# Supplementary material for: A COLQ Missense Mutation in Labrador Retrievers Having Congenital Myasthenic Syndrome
Source: PubMed Central journal article supplement (PMC4148433; doi:10.1371/journal.pone.0106425), 2014-08-28
Supplement: pone.0106425.s001.pdf [file pone.0106425.s001.pdf]

**Table S1. Primers (5'-3') for amplification of *CHRNA*, *CHRD*, and *COLQ***

| Gene         | Exon(s)     | Forward Primer Sequence (5'-3') | Reverse Primer Sequence (5'-3') | Cleanup Protocol    |
|--------------|-------------|---------------------------------|---------------------------------|---------------------|
| <i>CHRNA</i> | 1           | CCTGGCATTGTCATCTT               | TCAGGGGACAGAGGGTCT              | ExoSAP              |
|              | 2           | GTTGTCCCACCCGTCCT               | AAGAAGGGGCTGGCTCTA              | ExoSAP              |
|              | 3           | GACAGTGGGGGACACAGAG             | GTGCTAAGGGTGCCGTCC              | ExoSAP              |
|              | 4           | CCCTCCCTGCCTCTTCTG              | GGAAAAGGGACAAGTGGACA            | ExoSAP              |
|              | 5           | GCAGGTGGGGAGTAGCG               | TCCTTCCCTGCCTCAGTTTC            | ExoSAP              |
|              | 6           | GGCAGCAGAGGGGAGGAA              | CCTCCCTGTGCCACCCT               | Gel X               |
|              | 7           | GTCAGGCATCCAGTCTCC              | CACACACGAGACCACCTG              | Gel X               |
|              | 8           | GGGCATCACACACGAGAC              | CTACCCTCCTGCCACTCC              | ExoSAP              |
|              | 9           | CACTACCCTCCTGCCACTC             | TGTGGCAGGTGTATTATGC             | ExoSAP              |
|              | 10          | CAACCTTACCTTCTGCTCT             | CAGGTTGAGGAGAGAGAAGC            | ExoSAP              |
|              | 11          | CTTCTTCTCCACTCTATCCCA           | TGAGAAGGACCGAAGGAC              | ExoSAP              |
|              | 12          | GAGAAGGACCGAAGGACAC             | TGAGTGTGCTCTTTGGGAA             | ExoSAP              |
| <i>CHRD</i>  | 1           | TACTGGTCGTGTGTGGTAAGAG          | CTTCCCCTCCAGCCTCAGTT            | ExoSAP              |
|              | 2           | TTCCCCTCCAGCCTCAGT              | CTGGTAGATTGGGATTCTTCATC         | ExoSAP              |
|              | 3&4         | ATAGGCTCCCTTGGTTGTG             | CTGAAGCAGGAGGAAGAAG             | ExoSAP              |
|              | 5           | CCCCTGCTCTGTCCTGTTAG            | GGACATACCTACCGACACAAATCT        | ExoSAP              |
|              | 6           | GGAGACACCCACAAACAGAA            | CCTCTCCTCACTTCTCCTG             | Gel X               |
|              | 7&8         | ACTCACTCTCTCACTTGGTCCTCA        | CCAGGCACAAATGAGCAGAAG           | ExoSAP              |
|              | 9           | AATAGGGGAGAGTTGGAAGCA           | GACCAGAACGATTACAACGAGG          | ExoSAP              |
|              | 10          | CTGTAATAATAGCCTCCTTGTGTCC       | GGAGACACACACCCACTTAGATG         | ExoSAP              |
|              | 11          | TTACCCTCCTTAGACCCCT             | GAGAGGAAGGGAGAAACC              | ExoSAP              |
|              | <i>COLQ</i> | 1                               | GGGAAAGGAGAGAGAGAGACA           | TTCACCATTCTGCTCTCCG |
| 2            |             | CTGGGGGAAGGTTACATCAAG           | TGTGTCTGTTCTTCCACTGTC           | Gel X               |
| 3            |             | TCCATTCAAGCCAAGTATGTCTC         | GCTGCTGCCTAGATGGGTG             | Gel X               |
| 4&5          |             | AGTCCTGCCTTCCTACCA              | GTTGGGGGAGGGATGTGTAT            | Gel X               |
| 6            |             | TGAACCCCAAAACAAACC              | CTTCTCCTTCGGTTGGACTAC           | Gel X               |
| 7            |             | TGTCCTGGTTCATCCTAATCT           | ATTGAAAGCCAGTGCCG               | Gel X               |
| 8            |             | TTACAGCCCCACTAAAACCTG           | CAATGGTGAGCAGAAGACA             | Gel X               |
| 9&10         |             | TGGGCAAGTCCCTAATCTCTG           | TTGATGAGAGGGTTCCAGCA            | Gel X               |
| 11           |             | CAGTTGGAAAAAGTCTGGAATGAT        | GTGTAGGTGGGTGGTGTAGA            | Gel X               |
| 12           |             | GGCTCCTGCTCCAAAGTG              | GGAGAGGGCACAGGAGATG             | Gel X               |
| 13           |             | CGTGGACTTTGACCTTCTTTCT          | CGCAAAATCAGCCATCCAAC            | Gel X               |
| 14           |             | CTTCAGGAGGGATGACAGAGTG          | GAACCTCCTCTTTGAGCC              | Gel X               |
| 15           |             | AGAAGGTAGCCCCACAGAC             | CCTGTCCCTCCCTTTTCT              | Gel X               |
| 16           |             | GGCAGTCCCTGGATACAT              | TTTCTTAGTGCTCCTTATGTTCC         | Gel X               |
| 17a          |             | AGTGGCTGGTGTCTGATG              | CCAATAGCCAACCTTCAGT             | Gel X               |
| 17b          |             | GTCCAGTTTCTACCACCTTCATA         | TGGGTAGGCTTTTGGTGTTT            | Gel X               |
