# Supplementary material for: A COLQ Missense Mutation in Labrador Retrievers Having Congenital Myasthenic Syndrome
Source: PubMed Central journal article supplement (PMC4148433; doi:10.1371/journal.pone.0106425), 2014-08-28
Supplement: pone.0106425.s002.pdf [file pone.0106425.s002.pdf]

**Table S2. Candidate regions based on allele frequencies.**

| <b>CHR</b> | <b>SNP</b>             | <b>BP</b> | <b>A1</b> | <b>F_A</b> | <b>F_U</b> | <b>A2</b> |
|------------|------------------------|-----------|-----------|------------|------------|-----------|
| 3          | BICF2P187550           | 3039065   | 0         | 0          | 0          | C         |
| 3          | BICF2P686633           | 3069417   | A         | 0          | 0          | G         |
| 3          | BICF2P1191190          | 3092524   | G         | 0          | 0          | A         |
| 3          | BICF2P970802           | 3093508   | G         | 0          | 0          | A         |
| 3          | BICF2P446597           | 3114178   | G         | 0          | 0          | A         |
| 3          | BICF2P292856           | 3117110   | 0         | 0          | 0          | C         |
| 3          | TIGRP2P36343_rs8854696 | 3130036   | 0         | 0          | 0          | A         |
| 3          | BICF2P769773           | 3148115   | A         | 0          | 0          | G         |
| 3          | BICF2P892164           | 3153404   | 0         | 0          | 0          | A         |
| 3          | BICF2P273232           | 3168517   | G         | 0          | 0          | A         |
| 3          | BICF2P979854           | 3193623   | A         | 0          | 0          | G         |
| 3          | BICF2P957704           | 3198320   | C         | 0          | 0          | A         |
| 3          | BICF2P957980           | 3263471   | A         | 0          | 0          | G         |
| 3          | BICF2P1473165          | 3273029   | G         | 0          | 0          | A         |
| 3          | BICF2S22919855         | 3284779   | G         | 0.5        | 0.5        | C         |
| 3          | BICF2P260085           | 3300471   | A         | 0          | 0          | C         |
| 3          | BICF2P60226            | 3304950   | A         | 0.5        | 0.5        | G         |
| 3          | BICF2P1417361          | 3333218   | G         | 0.5        | 0.5        | A         |
| 3          | BICF2P1385313          | 3338634   | A         | 0          | 0          | G         |
| 3          | BICF2P1385315          | 3338821   | C         | 0.5        | 0.5        | A         |
| 3          | BICF2P1161316          | 3350089   | C         | 0.5        | 0.5        | A         |
| 3          | BICF2P483614           | 3351403   | A         | 0          | 0          | G         |
| 3          | BICF2P1250829          | 3368640   | A         | 0          | 0          | C         |
| 3          | BICF2P294175           | 3383005   | A         | 0.5        | 0.5        | G         |
| 3          | BICF2P698064           | 3395298   | A         | 0          | 0          | G         |
| 3          | BICF2P708935           | 3408351   | G         | 0.5        | 0.5        | A         |
| 3          | BICF2P826816           | 3421421   | G         | 0.5        | 0.5        | A         |
| 3          | BICF2P1361109          | 3434927   | G         | 0          | 0          | A         |
| 3          | BICF2P1385584          | 3448218   | A         | 0          | 0          | G         |
| 3          | BICF2P1226230          | 3467283   | A         | 0          | 0          | G         |
| 3          | BICF2P726132           | 3475890   | A         | 0          | 0          | G         |
| 3          | BICF2P321581           | 3487991   | G         | 0.5        | 0.5        | A         |
| 3          | BICF2P1157253          | 3501613   | A         | 0.5        | 0.5        | G         |
| 3          | BICF2P843988           | 3512438   | G         | 0.5        | 0.5        | A         |
| 3          | BICF2P350608           | 3521618   | A         | 0.5        | 0.5        | G         |
| 3          | BICF2P590308           | 3537778   | 0         | 0          | 0          | G         |
| 3          | BICF2P1496475          | 3547159   | A         | 0          | 0          | G         |
| 3          | BICF2P343750           | 3563420   | G         | 0.5        | 0.5        | A         |
| 3          | BICF2S23643602         | 3568490   | A         | 0.5        | 0.5        | G         |
| 3          | BICF2P216187           | 3593045   | A         | 0.5        | 0.5        | G         |
| 3          | BICF2P1342089          | 3620587   | A         | 0.5        | 0.5        | C         |
| 3          | BICF2S23734876         | 3624489   | G         | 1          | 0.7143     | A         |
| 3          | TIGRP2P36385_rs8799946 | 3665093   | G         | 0.5        | 0.5        | A         |
| 3          | TIGRP2P36389_rs9013240 | 3677104   | 0         | 0          | 0          | G         |

|   |                        |         |   |     |     |   |
|---|------------------------|---------|---|-----|-----|---|
| 3 | BICF2P388873           | 3680666 | 0 | 0   | 0   | G |
| 3 | TIGRP2P36393_rs9000896 | 3693974 | G | 0.5 | 0.5 | A |
| 3 | BICF2P211817           | 3712280 | A | 0.5 | 0.5 | C |
| 3 | BICF2P893560           | 3715842 | A | 0.5 | 0.5 | G |
| 3 | BICF2S23246428         | 3737394 | G | 0.5 | 0.5 | A |
| 3 | BICF2P211151           | 3745121 | A | 0.5 | 0.5 | G |
| 3 | BICF2P770078           | 3756501 | C | 0.5 | 0.5 | A |
| 3 | TIGRP2P36404_rs8872386 | 3763186 | 0 | 0   | 0   | A |
| 3 | BICF2P559486           | 3780109 | A | 0.5 | 0.5 | G |
| 3 | TIGRP2P36420_rs9214670 | 3798474 | A | 0   | 0   | G |
| 3 | TIGRP2P36424_rs9086194 | 3809151 | 0 | 0   | 0   | C |
| 3 | BICF2P386747           | 3819124 | G | 0.5 | 0.5 | A |
| 3 | BICF2S23234865         | 3870869 | A | 0   | 0   | G |
| 3 | BICF2S23230666         | 3875619 | A | 0   | 0   | G |
| 3 | BICF2S23735196         | 3903071 | G | 0   | 0   | A |
| 3 | BICF2P789209           | 3911149 | G | 0   | 0   | A |
| 3 | BICF2P229642           | 3922440 | A | 0   | 0   | G |
| 3 | TIGRP2P36451_rs8780839 | 3938760 | 0 | 0   | 0   | G |
| 3 | TIGRP2P36458_rs8587647 | 3946047 | G | 0   | 0   | A |
| 3 | BICF2S23328309         | 3956041 | C | 0   | 0   | A |
| 3 | BICF2P455712           | 3975513 | 0 | 0   | 0   | A |
| 3 | BICF2P948430           | 3983276 | T | 0   | 0   | A |
| 3 | BICF2S23019708         | 3997069 | A | 0   | 0   | G |
| 3 | BICF2P374175           | 4003152 | T | 0   | 0   | A |
| 3 | BICF2P1039509          | 4016616 | A | 1   | 1   | G |
| 3 | BICF2S23720562         | 4029146 | T | 0.5 | 0.5 | A |
| 3 | BICF2P1173228          | 4041855 | A | 1   | 1   | G |
| 3 | BICF2P579821           | 4056460 | A | 0   | 0   | G |
| 3 | BICF2P42954            | 4067754 | A | 1   | 1   | G |
| 3 | TIGRP2P36489_rs9234704 | 4069151 | C | 1   | 1   | A |
| 3 | TIGRP2P36492_rs8648834 | 4078544 | A | 0   | 0   | C |
| 3 | BICF2P174272           | 4083246 | C | 0   | 0   | A |
| 3 | BICF2P1239217          | 4112009 | G | 1   | 1   | A |
| 3 | BICF2S23118602         | 4119845 | 0 | 0   | 0   | G |
| 3 | TIGRP2P36496_rs9179969 | 4138894 | A | 1   | 1   | C |
| 3 | TIGRP2P36497_rs9146112 | 4147576 | G | 1   | 1   | A |
| 3 | BICF2S23327686         | 4156158 | G | 0   | 0   | C |
| 3 | BICF2P131234           | 4163973 | G | 0   | 0   | A |
| 3 | TIGRP2P36499_rs8778118 | 4179182 | A | 1   | 1   | T |
| 3 | BICF2P608440           | 4196413 | A | 0   | 0   | G |
| 3 | TIGRP2P36501_rs9086277 | 4218941 | A | 1   | 1   | G |
| 3 | BICF2P929337           | 4229407 | 0 | 0   | 0   | A |
| 3 | BICF2P173670           | 4235656 | 0 | 0   | 0   | T |
| 3 | BICF2S23536383         | 4246963 | 0 | 0   | 0   | C |
| 3 | BICF2P267803           | 4256968 | G | 1   | 1   | A |
| 3 | BICF2P132279           | 4274768 | G | 0   | 0   | A |
| 3 | BICF2S23522972         | 4309405 | G | 1   | 1   | C |

|   |                        |         |   |     |     |   |
|---|------------------------|---------|---|-----|-----|---|
| 3 | BICF2S2331851          | 4312101 | G | 0   | 0   | A |
| 3 | BICF2P1300188          | 4316110 | A | 0   | 0   | G |
| 3 | BICF2P882229           | 4333324 | A | 0.5 | 0.5 | C |
| 3 | BICF2S23141168         | 4346531 | 0 | 0   | 0   | G |
| 3 | BICF2S23347900         | 4352336 | A | 1   | 1   | G |
| 3 | BICF2P131240           | 4375256 | G | 0   | 0   | A |
| 3 | TIGRP2P36524_rs8789378 | 4387480 | A | 1   | 1   | G |
| 3 | BICF2S2315274          | 4389257 | C | 0   | 0   | A |
| 3 | BICF2S22942369         | 4410116 | T | 0   | 0   | A |
| 3 | BICF2P51740            | 4421103 | G | 1   | 1   | A |
| 3 | BICF2S2321203          | 4437180 | G | 0   | 0   | A |
| 3 | BICF2P646107           | 4441536 | G | 1   | 1   | A |
| 3 | BICF2S22942857         | 4468832 | A | 0   | 0   | C |
| 3 | TIGRP2P36564_rs8512496 | 4474123 | 0 | 0   | 0   | A |
| 3 | TIGRP2P36570_rs8784408 | 4489224 | A | 1   | 1   | C |
| 3 | BICF2P768261           | 4503704 | 0 | 0   | 0   | T |
| 3 | BICF2S22955566         | 4512472 | A | 1   | 1   | G |
| 3 | BICF2P675173           | 4527335 | G | 0   | 0   | A |
| 3 | TIGRP2P36576_rs9086577 | 4532615 | 0 | 0   | 0   | G |
| 3 | BICF2P770008           | 4553401 | G | 1   | 1   | A |
| 3 | BICF2P506590           | 4555779 | G | 0   | 0   | A |
| 3 | BICF2P8793             | 4593671 | A | 0   | 0   | G |
| 3 | BICF2S24112683         | 4625311 | A | 0   | 0   | G |
| 3 | BICF2P911821           | 4656514 | 0 | 0   | 0   | G |
| 3 | TIGRP2P36578_rs9180233 | 4668151 | 0 | 0   | 0   | G |
| 3 | BICF2P1446089          | 4671003 | 0 | 0   | 0   | G |
| 3 | BICF2P910977           | 4685799 | 0 | 0   | 0   | G |
| 3 | BICF2P863023           | 4695416 | G | 0   | 0   | A |
| 3 | BICF2S23051267         | 4711551 | A | 0.5 | 0.5 | G |
| 3 | BICF2P405194           | 4733612 | 0 | 0   | 0   | G |
| 3 | G213f32S347            | 4754957 | 0 | 0   | 0   | C |
| 3 | BICF2P817678           | 4776946 | T | 0   | 0   | A |
| 3 | BICF2S23119909         | 4800345 | A | 0   | 0   | G |
| 3 | BICF2P1149827          | 4807249 | 0 | 0   | 0   | A |
| 3 | BICF2S2454847          | 4820610 | G | 0   | 0   | A |
| 3 | BICF2S23354924         | 4834254 | A | 0   | 0   | G |
| 3 | BICF2S23655793         | 4843316 | A | 0   | 0   | C |
| 3 | TIGRP2P36588_rs9221704 | 4858035 | A | 0   | 0   | C |
| 3 | TIGRP2P36590_rs8840854 | 4871621 | G | 0   | 0   | A |
| 3 | BICF2P323237           | 4877956 | G | 0   | 0   | A |
| 3 | BICF2P763435           | 4888748 | 0 | 0   | 0   | T |
| 3 | BICF2P448218           | 4903560 | A | 0   | 0   | G |
| 3 | TIGRP2P36592_rs8960698 | 4914879 | G | 0   | 0   | A |
| 3 | BICF2P64170            | 4928180 | A | 0   | 0   | G |
| 3 | BICF2P1176410          | 4933849 | A | 1   | 1   | G |
| 3 | BICF2P597829           | 4954601 | A | 0   | 0   | G |
| 3 | BICF2P1080714          | 4959855 | G | 0   | 0   | A |

|   |                        |         |   |     |     |   |
|---|------------------------|---------|---|-----|-----|---|
| 3 | TIGRP2P36601_rs9162510 | 4973704 | A | 1   | 1   | G |
| 3 | BICF2S23030965         | 4980149 | A | 0   | 0   | G |
| 3 | TIGRP2P36602_rs8695031 | 4998453 | A | 0.5 | 0.5 | G |
| 3 | BICF2P373707           | 5002569 | A | 0   | 0   | G |
| 3 | BICF2P183465           | 5017690 | A | 0   | 0   | G |
| 3 | BICF2P123336           | 5026158 | A | 0   | 0   | G |
| 3 | TIGRP2P36605_rs8503054 | 5027243 | A | 0   | 0   | G |
| 3 | BICF2P1269887          | 5031928 | G | 0   | 0   | A |
| 3 | BICF2S23453643         | 5063126 | 0 | 0   | 0   | G |
| 3 | BICF2S23239386         | 5082620 | G | 0   | 0   | A |
| 3 | BICF2P502510           | 5084816 | T | 0.5 | 0.5 | A |
| 3 | BICF2S23452615         | 5095744 | G | 0   | 0   | A |
| 3 | BICF2S23214550         | 5106228 | A | 0   | 0   | G |
| 3 | BICF2P770946           | 5114261 | 0 | 0   | 0   | A |
| 3 | TIGRP2P45085_rs9080684 | 5121092 | A | 0   | 0   | G |
| 3 | BICF2P608989           | 5137673 | 0 | 0   | 0   | A |
| 3 | BICF2P399448           | 5151785 | 0 | 0   | 0   | G |
| 3 | BICF2P1117346          | 5162057 | A | 0   | 0   | C |
| 3 | BICF2P774726           | 5170412 | G | 0   | 0   | A |
| 3 | BICF2S23239200         | 5176486 | A | 0   | 0   | G |
| 3 | BICF2P39835            | 5187817 | 0 | 0   | 0   | A |
| 3 | BICF2P1436036          | 5201070 | A | 0   | 0   | C |
| 3 | BICF2P879101           | 5211310 | A | 0   | 0   | G |
| 3 | BICF2P113112           | 5221225 | A | 0.5 | 0.5 | G |
| 3 | BICF2P379530           | 5233667 | C | 0   | 0   | A |
| 3 | BICF2P475099           | 5245090 | A | 0   | 0   | G |
| 3 | TIGRP2P45104_rs8838788 | 5260931 | G | 0   | 0   | A |
| 3 | BICF2P640419           | 5268379 | 0 | 0   | 0   | A |
| 3 | BICF2P614195           | 5279507 | 0 | 0   | 0   | G |
| 3 | BICF2P150216           | 5299580 | A | 0   | 0   | G |
| 3 | BICF2P627931           | 5303385 | 0 | 0   | 0   | G |
| 3 | BICF2P360769           | 5317509 | 0 | 0   | 0   | G |
| 3 | BICF2P529456           | 5328933 | A | 0   | 0   | G |
| 3 | TIGRP2P45112_rs9001383 | 5338620 | C | 0   | 0   | A |
| 3 | BICF2S23246002         | 5360078 | 0 | 0   | 0   | G |
| 3 | BICF2P194703           | 5371137 | G | 0   | 0   | A |
| 3 | BICF2P209319           | 5384473 | G | 0   | 0   | A |
| 3 | BICF2P22627            | 5401853 | A | 0   | 0   | G |
| 3 | TIGRP2P45129_rs9029329 | 5410018 | A | 0   | 0   | G |
| 3 | BICF2P1038896          | 5426478 | A | 0   | 0   | G |
| 3 | BICF2S2337294          | 5436506 | A | 0   | 0   | G |
| 3 | BICF2P785126           | 5441183 | A | 0   | 0   | G |
| 3 | BICF2P1209289          | 5456793 | A | 0   | 0   | G |
| 3 | TIGRP2P45140_rs9126689 | 5471514 | G | 0   | 0   | A |
| 3 | TIGRP2P45143_rs8858705 | 5475615 | G | 0   | 0   | A |
| 3 | TIGRP2P45151_rs9083376 | 5487857 | G | 0   | 0   | A |
| 3 | TIGRP2P45157_rs8516350 | 5508995 | T | 1   | 1   | A |

|   |                        |         |   |     |     |   |
|---|------------------------|---------|---|-----|-----|---|
| 3 | BICF2P112727           | 5521110 | A | 0   | 0   | G |
| 3 | BICF2P148547           | 5534827 | A | 0   | 0   | G |
| 3 | TIGRP2P45171_rs8861245 | 5564882 | A | 1   | 1   | G |
| 3 | BICF2P761881           | 5573179 | C | 0.5 | 0.5 | A |
| 3 | BICF2P363714           | 5581700 | G | 1   | 1   | A |
| 3 | BICF2P1010972          | 5592544 | A | 1   | 1   | G |
| 3 | TIGRP2P45176_rs9105743 | 5638043 | A | 0   | 0   | G |
| 3 | TIGRP2P45178_rs9042445 | 5647032 | C | 0   | 0   | G |
| 3 | TIGRP2P45180_rs9114922 | 5663002 | 0 | 0   | 0   | G |
| 3 | BICF2P578362           | 5678533 | 0 | 0   | 0   | G |
| 3 | BICF2P1026069          | 5700685 | A | 0   | 0   | G |
| 3 | BICF2P327737           | 5709075 | A | 0   | 0   | G |
| 3 | TIGRP2P45197_rs8692610 | 5719522 | G | 0   | 0   | A |
| 3 | BICF2S22960989         | 5736343 | C | 0.5 | 0.5 | A |
| 3 | TIGRP2P45218_rs8912453 | 5742823 | G | 0.5 | 0.5 | A |
| 3 | BICF2P1190297          | 5752510 | G | 0.5 | 0.5 | A |
| 3 | BICF2S2328630          | 5770706 | A | 0   | 0   | G |
| 3 | BICF2P840628           | 5806192 | A | 0   | 0   | G |
| 3 | BICF2S23347294         | 5808087 | 0 | 0   | 0   | G |
| 3 | TIGRP2P45242_rs8804141 | 5834019 | G | 0   | 0   | A |
| 3 | BICF2P1294537          | 5849603 | 0 | 0   | 0   | A |
| 3 | TIGRP2P45246_rs8859379 | 5864745 | A | 0   | 0   | G |
| 3 | TIGRP2P45247_rs9138202 | 5865947 | A | 0.5 | 0.5 | G |
| 3 | TIGRP2P45249_rs9090647 | 5876747 | G | 0   | 0   | A |
| 3 | BICF2P721123           | 5899710 | G | 0   | 0   | A |
| 3 | BICF2P121216           | 5916047 | 0 | 0   | 0   | A |
| 3 | BICF2P1381494          | 5931456 | 0 | 0   | 0   | T |
| 3 | TIGRP2P45259_rs8833312 | 5942967 | A | 0   | 0   | C |
| 3 | TIGRP2P45264_rs8762304 | 5960454 | A | 0   | 0   | G |
| 3 | BICF2P1018229          | 5970041 | A | 0   | 0   | G |
| 3 | TIGRP2P45267_rs9126590 | 5988284 | G | 0   | 0   | C |
| 3 | BICF2P569426           | 6000198 | G | 0   | 0   | A |
| 3 | BICF2P238213           | 6009648 | C | 0   | 0   | A |
| 3 | BICF2P374874           | 6017539 | 0 | 0   | 0   | G |
| 3 | BICF2P370702           | 6036115 | 0 | 0   | 0   | G |
| 3 | TIGRP2P45276_rs9120264 | 6048543 | A | 0   | 0   | G |
| 3 | BICF2P432580           | 6063402 | 0 | 0   | 0   | A |
| 3 | BICF2P87500            | 6082996 | 0 | 0   | 0   | G |
| 3 | BICF2P1023047          | 6148587 | G | 0   | 0   | A |
| 3 | BICF2P926075           | 6174110 | 0 | 0   | 0   | G |
| 3 | BICF2P927164           | 6177284 | 0 | 0   | 0   | T |
| 3 | BICF2P133199           | 6216098 | A | 0   | 0   | G |
| 3 | BICF2P1340534          | 6230628 | 0 | 0   | 0   | G |
| 3 | BICF2P556026           | 6241715 | C | 0   | 0   | A |
| 3 | BICF2P35114            | 6250178 | G | 0.5 | 0.5 | A |
| 3 | BICF2P510160           | 6257542 | G | 0.5 | 0.5 | A |
| 3 | TIGRP2P45301_rs9104411 | 6272593 | A | 0   | 0   | G |

|   |                        |         |   |     |     |   |
|---|------------------------|---------|---|-----|-----|---|
| 3 | BICF2P412371           | 6280200 | G | 0.5 | 0.5 | A |
| 3 | BICF2P152439           | 6305511 | A | 0.5 | 0.5 | C |
| 3 | TIGRP2P45306_rs8965847 | 6319525 | A | 0   | 0   | G |
| 3 | G215f44S98             | 6340031 | A | 0.5 | 0.5 | G |
| 3 | BICF2P844916           | 6359765 | 0 | 0   | 0   | G |
| 3 | BICF2P623216           | 6379817 | A | 0.5 | 0.5 | G |
| 3 | TIGRP2P45309_rs9154617 | 6386168 | 0 | 0   | 0   | C |
| 3 | BICF2P1182555          | 6401686 | A | 0.5 | 0.5 | G |
| 3 | BICF2P64060            | 6411068 | A | 0.5 | 0.5 | G |
| 3 | BICF2P1458832          | 6417921 | A | 0.5 | 0.5 | C |
| 3 | BICF2P158838           | 6433958 | G | 0.5 | 0.5 | A |
| 3 | BICF2P255248           | 6448198 | 0 | 0   | 0   | A |
| 3 | BICF2S23717124         | 6453902 | G | 0   | 0   | C |
| 3 | BICF2P120908           | 6465754 | 0 | 0   | 0   | G |
| 3 | BICF2S23122481         | 6479523 | 0 | 0   | 0   | G |
| 3 | BICF2P778286           | 6488105 | A | 0.5 | 0.5 | C |
| 3 | BICF2P1072765          | 6535448 | G | 0   | 0   | A |
| 3 | BICF2P218960           | 6545410 | 0 | 0   | 0   | A |
| 3 | BICF2P764002           | 6565695 | A | 0.5 | 0.5 | G |
| 3 | BICF2S22911832         | 6585336 | 0 | 0   | 0   | A |
| 3 | BICF2P257223           | 6595265 | 0 | 0   | 0   | A |
| 3 | BICF2P775487           | 6608661 | 0 | 0   | 0   | A |
| 3 | BICF2P1038060          | 6617219 | A | 0.5 | 0.5 | G |
| 3 | BICF2P1389575          | 6643811 | A | 0.5 | 0.5 | G |
| 3 | BICF2P718727           | 6654087 | 0 | 0   | 0   | A |
| 3 | BICF2P1324543          | 6669598 | 0 | 0   | 0   | G |
| 3 | BICF2P1126290          | 6677696 | 0 | 0   | 0   | A |
| 3 | BICF2P625748           | 6684247 | A | 0.5 | 0.5 | C |
| 3 | BICF2P1475251          | 6693476 | T | 1   | 1   | A |
| 3 | BICF2P750243           | 6705845 | 0 | 0   | 0   | G |
| 3 | BICF2P818194           | 6717409 | G | 0   | 0   | A |
| 3 | BICF2P160065           | 6730555 | A | 0   | 0   | G |
| 3 | BICF2P425876           | 6751338 | 0 | 0   | 0   | A |
| 3 | BICF2S244930           | 6770801 | G | 0   | 0   | A |
| 3 | BICF2P226095           | 6784469 | 0 | 0   | 0   | A |
| 3 | BICF2P1275437          | 6814927 | 0 | 0   | 0   | A |
| 3 | BICF2S23218457         | 6829635 | A | 0   | 0   | G |
| 3 | BICF2S2444071          | 6838009 | 0 | 0   | 0   | A |
| 3 | TIGRP2P45350_rs8998629 | 6859497 | 0 | 0   | 0   | A |
| 3 | TIGRP2P45351_rs8778463 | 6902396 | 0 | 0   | 0   | C |
| 3 | TIGRP2P45352_rs9214992 | 6936062 | 0 | 0   | 0   | G |
| 3 | BICF2P1049811          | 6956567 | A | 0.5 | 0.5 | G |
| 3 | BICF2P1315430          | 6959902 | 0 | 0   | 0   | G |
| 3 | BICF2P1109615          | 6974365 | A | 0.5 | 0.5 | C |
| 3 | TIGRP2P45362_rs8911608 | 7003060 | A | 1   | 1   | C |
| 3 | TIGRP2P45363_rs9170628 | 7005739 | G | 0.5 | 0.5 | A |
| 3 | BICF2P963720           | 7015262 | 0 | 0   | 0   | A |

|   |                        |         |   |     |     |   |
|---|------------------------|---------|---|-----|-----|---|
| 3 | TIGRP2P45368_rs9056918 | 7031996 | T | 0.5 | 0.5 | A |
| 3 | BICF2P1100375          | 7044323 | A | 0.5 | 0.5 | G |
| 3 | BICF2P1191460          | 7053155 | 0 | 0   | 0   | G |
| 3 | BICF2P100171           | 7085123 | 0 | 0   | 0   | A |
| 3 | BICF2P1210047          | 7099529 | C | 1   | 1   | A |
| 3 | BICF2P324741           | 7108488 | A | 1   | 1   | G |
| 3 | BICF2P944098           | 7128965 | A | 1   | 1   | C |
| 3 | BICF2P1281325          | 7142656 | G | 1   | 1   | A |
| 3 | TIGRP2P45392_rs8912615 | 7157590 | C | 0   | 0   | G |
| 3 | BICF2P765781           | 7159271 | A | 1   | 1   | G |
| 3 | BICF2P1467435          | 7165460 | G | 1   | 1   | A |
| 3 | BICF2P548951           | 7183766 | A | 1   | 1   | G |
| 3 | BICF2P746545           | 7187572 | A | 1   | 1   | C |
| 3 | BICF2P321758           | 7200983 | 0 | 0   | 0   | C |
| 3 | BICF2P652168           | 7216242 | A | 1   | 1   | G |
| 3 | BICF2S23415855         | 7233462 | A | 0   | 0   | G |
| 3 | BICF2S23417246         | 7237134 | A | 0   | 0   | G |
| 3 | BICF2S23250633         | 7247855 | A | 0   | 0   | C |
| 3 | BICF2S2373463          | 7261663 | C | 0   | 0   | A |
| 3 | BICF2P721893           | 7271683 | A | 1   | 1   | G |
| 3 | BICF2P639558           | 7281263 | 0 | 0   | 0   | G |
| 3 | BICF2P1305404          | 7291000 | A | 1   | 1   | G |
| 3 | BICF2P1438676          | 7304494 | 0 | 0   | 0   | G |
| 3 | BICF2P334455           | 7318331 | A | 1   | 1   | G |
| 3 | BICF2P1235966          | 7324890 | 0 | 0   | 0   | G |
| 3 | BICF2S23343243         | 7330607 | C | 0   | 0   | A |
| 3 | BICF2S23622462         | 7338908 | G | 1   | 1   | A |
| 3 | BICF2S23442646         | 7360247 | A | 0   | 0   | G |
| 3 | BICF2S23144152         | 7374435 | G | 0   | 0   | A |
| 3 | TIGRP2P45421_rs9134255 | 7394172 | 0 | 0   | 0   | G |
| 3 | BICF2P402373           | 7400987 | 0 | 0   | 0   | C |
| 3 | BICF2P135713           | 7424979 | 0 | 0   | 0   | G |
| 3 | BICF2P1141444          | 7439976 | 0 | 0   | 0   | C |
| 3 | BICF2S2293065          | 7473058 | A | 0   | 0   | G |
| 3 | BICF2S2371566          | 7480480 | A | 0   | 0   | G |
| 3 | TIGRP2P45424_rs9030361 | 7499946 | 0 | 0   | 0   | G |
| 3 | BICF2S2296470          | 7512729 | A | 0   | 0   | C |
| 3 | BICF2P540583           | 7532293 | A | 1   | 1   | G |
| 3 | BICF2P545236           | 7546602 | 0 | 0   | 0   | G |
| 3 | BICF2P1196237          | 7585270 | G | 1   | 1   | A |
| 3 | BICF2P1189099          | 7591169 | 0 | 0   | 0   | G |
| 3 | BICF2S23637832         | 7607940 | C | 1   | 1   | A |
| 3 | BICF2P1248631          | 7621958 | A | 1   | 1   | G |
| 3 | TIGRP2P45434_rs8643526 | 7633836 | 0 | 0   | 0   | A |
| 3 | BICF2P1371995          | 7658828 | 0 | 0   | 0   | C |
| 3 | BICF2P1011641          | 7676703 | A | 1   | 1   | G |
| 3 | BICF2P191993           | 7686724 | 0 | 0   | 0   | A |

|   |                        |         |   |     |     |   |
|---|------------------------|---------|---|-----|-----|---|
| 3 | BICF2P384729           | 7694686 | G | 1   | 1   | A |
| 3 | BICF2P668685           | 7706187 | C | 1   | 1   | A |
| 3 | BICF2P113222           | 7719077 | 0 | 0   | 0   | G |
| 3 | BICF2P92993            | 7745945 | A | 1   | 1   | G |
| 3 | BICF2P1230901          | 7751495 | A | 1   | 1   | C |
| 3 | BICF2P59387            | 7771458 | A | 1   | 1   | G |
| 3 | TIGRP2P45454_rs8811853 | 7782466 | A | 1   | 1   | G |
| 3 | BICF2P877719           | 7791517 | G | 1   | 1   | A |
| 3 | TIGRP2P45462_rs8969936 | 7800966 | A | 0   | 0   | C |
| 3 | TIGRP2P45470_rs8903125 | 7809289 | A | 0   | 0   | G |
| 3 | BICF2S2339067          | 7821823 | A | 0.5 | 0.5 | G |
| 3 | TIGRP2P45492_rs9034213 | 7832484 | C | 0   | 0   | A |
| 3 | BICF2P1331559          | 7843594 | A | 0.5 | 0.5 | G |
| 3 | BICF2P365041           | 7845498 | G | 0.5 | 0.5 | A |
| 3 | BICF2P1339644          | 7869260 | G | 0   | 0   | A |
| 3 | BICF2P1093678          | 7898116 | 0 | 0   | 0   | A |
| 3 | BICF2P910224           | 7901603 | A | 0   | 0   | T |
| 3 | TIGRP2P45498_rs8907234 | 7913198 | 0 | 0   | 0   | G |
| 3 | BICF2S23148795         | 7941706 | T | 0   | 0   | A |
| 3 | BICF2P8038             | 7963004 | A | NA  | 0.5 | G |
| 3 | BICF2S23138077         | 7980952 | A | 0.5 | 0.5 | G |
| 3 | BICF2S23137813         | 7985001 | 0 | 0   | 0   | A |
| 3 | BICF2P121017           | 8005271 | 0 | 0   | 0   | A |
| 3 | BICF2P96074            | 8022952 | 0 | 0   | 0   | A |
| 3 | BICF2S23715582         | 8046860 | A | 0.5 | 0.5 | C |
| 3 | BICF2P239474           | 8052016 | 0 | 0   | 0   | A |
| 3 | BICF2P105885           | 8068793 | 0 | 0   | 0   | A |
| 3 | G216f18S108            | 8094673 | 0 | 0   | 0   | A |
| 3 | G216f22S363            | 8097273 | 0 | 0   | 0   | C |
| 3 | BICF2P1174301          | 8122987 | 0 | 0   | 0   | A |
| 3 | BICF2P1196757          | 8133607 | 0 | 0   | 0   | A |
| 3 | BICF2P249198           | 8165688 | A | 0   | 0   | G |
| 3 | TIGRP2P45503_rs9133910 | 8196101 | 0 | 0   | 0   | A |
| 3 | BICF2P1192849          | 8211178 | G | 0   | 0   | A |
| 3 | G217f42S297            | 8241731 | 0 | 0   | 0   | C |
| 3 | BICF2P852292           | 8269294 | A | 0.5 | 0.5 | G |
| 3 | BICF2P968439           | 8285812 | 0 | 0   | 0   | G |
| 3 | BICF2S2316598          | 8296160 | A | 0.5 | 0.5 | G |
| 3 | BICF2S22936690         | 8304460 | 0 | 0   | 0   | G |
| 3 | BICF2S2304070          | 8321106 | C | 0.5 | 0.5 | A |
| 3 | BICF2S24115352         | 8332047 | G | 0.5 | 0.5 | A |
| 3 | BICF2P1058423          | 8346513 | 0 | 0   | 0   | C |
| 3 | BICF2P223058           | 8370253 | 0 | 0   | 0   | G |
| 3 | TIGRP2P45505_rs9136545 | 8379921 | 0 | 0   | 0   | A |
| 3 | BICF2P1402035          | 8391807 | 0 | 0   | 0   | A |
| 3 | BICF2P384548           | 8400182 | A | 0.5 | 0.5 | C |
| 3 | BICF2P1061008          | 8440653 | A | 0.5 | 0.5 | C |



|   |                        |         |   |     |     |   |
|---|------------------------|---------|---|-----|-----|---|
| 3 | BICF2P394877           | 8443087 | A | 0.5 | 0.5 | G |
| 3 | BICF2P394880           | 8443237 | A | 0.5 | 0.5 | C |
| 3 | BICF2P1011805          | 8474530 | G | 0.5 | 0.5 | A |
| 3 | BICF2S23210027         | 8483449 | A | 0   | 0   | C |
| 3 | BICF2S23345528         | 8487745 | G | 0.5 | 0.5 | A |
| 3 | G218f46S257            | 8510901 | A | 0   | 0   | G |
| 3 | TIGRP2P45528_rs9141525 | 8525501 | A | 0   | 0   | G |
| 3 | BICF2P351298           | 8566768 | A | 0.5 | 0.5 | G |
| 3 | BICF2P1173106          | 8577197 | G | 0.5 | 0.5 | A |
| 3 | BICF2P906317           | 8582474 | A | 0.5 | 0.5 | G |
| 3 | BICF2S23413877         | 8596944 | C | 0   | 0   | A |
| 3 | BICF2P1361596          | 8610095 | G | 0   | 0   | A |
| 3 | BICF2P568320           | 8624923 | G | 0.5 | 0.5 | A |
| 3 | TIGRP2P45589_rs8592830 | 8637459 | G | 0.5 | 0.5 | A |
| 3 | BICF2P1207838          | 8657487 | G | 0.5 | 0.5 | A |
| 3 | BICF2P248036           | 8667425 | A | 0.5 | 0.5 | G |
| 3 | BICF2S23420591         | 8672885 | G | 0.5 | 0.5 | A |
| 3 | BICF2P856382           | 8691934 | G | 0   | 0   | A |
| 3 | BICF2P258336           | 8721170 | C | 0.5 | 0.5 | A |
| 3 | BICF2P295557           | 8737205 | A | 0.5 | 0.5 | C |
| 3 | TIGRP2P45615_rs9044961 | 8777165 | 0 | 0   | 0   | A |
| 3 | BICF2P1183213          | 8802690 | 0 | 0   | 0   | A |
| 3 | TIGRP2P45620_rs8593068 | 8813812 | 0 | 0   | 0   | A |
| 3 | BICF2P806256           | 8831011 | 0 | 0   | 0   | C |
| 3 | BICF2P274451           | 8851662 | 0 | 0   | 0   | A |
| 3 | BICF2P512031           | 8856941 | C | 1   | 1   | A |
| 3 | BICF2P732834           | 8892632 | 0 | 0   | 0   | G |
| 3 | TIGRP2P45621_rs8904167 | 8903718 | C | 0.5 | 0.5 | A |
| 3 | BICF2S23512103         | 8913698 | A | 0   | 0   | C |
| 3 | BICF2P1314301          | 8944849 | 0 | 0   | 0   | G |
| 3 | BICF2S23320254         | 8954795 | A | 0   | 0   | G |
| 3 | BICF2S23241911         | 8968621 | G | 0.5 | 0.5 | A |
| 3 | BICF2P290894           | 8978705 | C | 1   | 1   | A |
| 3 | BICF2P951218           | 8982612 | A | 1   | 1   | G |
| 3 | BICF2P1007222          | 8995523 | G | 1   | 1   | A |
| 3 | BICF2P569255           | 9004559 | A | 1   | 1   | G |
| 3 | BICF2P588481           | 9019454 | A | 1   | 1   | G |
| 3 | BICF2S23427319         | 9028398 | G | 0   | 0   | A |
| 3 | BICF2P5008             | 9032658 | G | 0.5 | 0.5 | A |
| 3 | BICF2P822346           | 9040798 | G | 0.5 | 0.5 | A |
| 3 | BICF2P834433           | 9058347 | A | 0.5 | 0.5 | G |
| 3 | BICF2P546585           | 9064208 | A | 0.5 | 0.5 | C |
| 3 | BICF2P937173           | 9074502 | A | 0.5 | 0.5 | G |
| 3 | BICF2P422772           | 9096468 | G | 0.5 | 0.5 | A |
| 3 | BICF2P1104313          | 9112930 | G | 0.5 | 0.5 | A |
| 3 | BICF2S23532115         | 9153378 | 0 | 0   | 0   | A |
| 3 | TIGRP2P45681_rs8909428 | 9160101 | 0 | 0   | 0   | C |

|   |                        |         |   |     |     |   |
|---|------------------------|---------|---|-----|-----|---|
| 3 | BICF2P992541           | 9167188 | A | 0.5 | 0.5 | G |
| 3 | TIGRP2P45691_rs8865526 | 9179326 | G | 0   | 0   | A |
| 3 | BICF2P258919           | 9190590 | G | 0   | 0   | A |
| 3 | BICF2P715385           | 9205664 | A | 0   | 0   | G |
| 3 | TIGRP2P45706_rs8599500 | 9218569 | G | 0   | 0   | A |
| 3 | BICF2S23333174         | 9229621 | G | 0   | 0   | A |
| 3 | BICF2S23148241         | 9241904 | A | 0.5 | 0.5 | G |
| 3 | BICF2P466284           | 9247011 | G | 0.5 | 0.5 | A |
| 3 | BICF2P457198           | 9260655 | G | 0.5 | 0.5 | A |
| 3 | BICF2P628008           | 9271118 | A | 0.5 | 0.5 | G |
| 3 | BICF2P483772           | 9289756 | C | 0   | 0   | A |
| 3 | BICF2P289429           | 9295671 | G | 0.5 | 0.5 | A |
| 3 | BICF2P966238           | 9306122 | A | 0.5 | 0.5 | G |
| 3 | BICF2P3611             | 9322095 | G | 0.5 | 0.5 | A |
| 3 | BICF2P1284028          | 9335997 | A | 0.5 | 0.5 | G |
| 3 | BICF2P552772           | 9346034 | C | 0.5 | 0.5 | G |
| 3 | TIGRP2P45754_rs9123858 | 9352098 | 0 | 0   | 0   | A |
| 3 | BICF2S24411064         | 9362773 | A | 0   | 0   | G |
| 3 | BICF2S23314596         | 9374543 | A | 0   | 0   | G |
| 3 | BICF2P173727           | 9388094 | A | 0.5 | 0.5 | C |
| 3 | TIGRP2P45779_rs9107776 | 9403160 | A | 0.5 | 0.5 | G |
| 3 | BICF2P755008           | 9410150 | 0 | 0   | 0   | A |
| 3 | TIGRP2P45797_rs9041842 | 9424776 | C | 0.5 | 0.5 | A |
| 3 | BICF2P601292           | 9434108 | A | 0.5 | 0.5 | G |
| 3 | TIGRP2P45824_rs8859874 | 9443380 | C | 0.5 | 0.5 | A |
| 3 | TIGRP2P45829_rs8770184 | 9459700 | A | 1   | 1   | G |
| 3 | BICF2S23612703         | 9472808 | A | 0.5 | 0.5 | G |
| 3 | BICF2S23535224         | 9483495 | C | 0.5 | 0.5 | A |
| 3 | BICF2P1177132          | 9498050 | 0 | 0   | 0   | G |
| 3 | BICF2P618328           | 9508000 | C | 1   | 1   | A |
| 3 | BICF2P597287           | 9520707 | G | 0.5 | 0.5 | A |
| 3 | BICF2P568205           | 9524677 | C | 0.5 | 0.5 | A |
| 3 | BICF2S23415543         | 9533656 | A | 0.5 | 0.5 | G |
| 3 | BICF2P321638           | 9548768 | A | 0.5 | 0.5 | G |
| 3 | TIGRP2P45860_rs8748956 | 9565006 | A | 0.5 | 0.5 | G |
| 3 | TIGRP2P45864_rs9117122 | 9570681 | G | 0   | 0   | A |
| 3 | TIGRP2P45870_rs8723359 | 9587629 | A | 0   | 0   | G |
| 3 | TIGRP2P45883_rs8651134 | 9598231 | G | 0.5 | 0.5 | A |
| 3 | TIGRP2P45888_rs8495342 | 9610915 | A | 0.5 | 0.5 | G |
| 3 | BICF2P1276741          | 9614971 | A | 0.5 | 0.5 | C |
| 3 | TIGRP2P45895_rs9120278 | 9636904 | G | 0.5 | 0.5 | A |
| 3 | BICF2P421687           | 9639531 | G | 0   | 0   | A |
| 3 | TIGRP2P45906_rs8571680 | 9649939 | C | 0.5 | 0.5 | A |
| 3 | BICF2P544891           | 9667374 | 0 | 0   | 0   | G |
| 3 | BICF2P243279           | 9683118 | A | 0.5 | 0.7 | G |
| 3 | BICF2P411956           | 9697479 | 0 | 0   | 0   | G |
| 3 | BICF2S23653857         | 9713463 | G | 0   | 0   | A |

|   |                        |          |   |     |     |   |
|---|------------------------|----------|---|-----|-----|---|
| 3 | BICF2S23452713         | 9718589  | G | 0   | 0   | A |
| 3 | TIGRP2P45913_rs8785988 | 9732824  | A | 0   | 0   | G |
| 3 | BICF2S23724973         | 9765040  | C | 0.5 | 0.5 | G |
| 3 | BICF2P48333            | 9780868  | G | 0   | 0   | A |
| 3 | BICF2P1436660          | 9801015  | G | 0   | 0   | A |
| 3 | BICF2S23312223         | 9818208  | A | 0   | 0   | G |
| 3 | BICF2P1216659          | 9836417  | A | 1   | 1   | T |
| 3 | BICF2P712305           | 9846089  | G | 0   | 0   | A |
| 3 | BICF2S23525101         | 9856191  | G | 0   | 0   | A |
| 3 | BICF2P874673           | 9869094  | A | 0   | 0   | G |
| 3 | BICF2S2302543          | 9882752  | C | 0   | 0   | A |
| 3 | BICF2P964521           | 9897612  | A | 0   | 0   | G |
| 3 | BICF2P322642           | 9910120  | A | 0   | 0   | G |
| 3 | BICF2P132784           | 9913272  | A | 0.5 | 0.5 | G |
| 3 | BICF2S23428747         | 9924517  | T | 0   | 0   | A |
| 3 | BICF2S23551404         | 9944981  | A | 0   | 0   | G |
| 3 | TIGRP2P45978_rs9156962 | 9954059  | G | 0.5 | 0.5 | A |
| 3 | BICF2S23335974         | 9963481  | A | 0   | 0   | G |
| 3 | TIGRP2P45985_rs8854856 | 9972611  | A | 1   | 1   | G |
| 3 | BICF2P638648           | 9995007  | C | 0   | 0   | A |
| 3 | BICF2P232647           | 10012277 | A | 1   | 1   | C |
| 3 | BICF2P205732           | 10020239 | A | 0   | 0   | C |
| 3 | BICF2S23144027         | 10031804 | A | 1   | 1   | G |
| 3 | BICF2P55003            | 10043907 | 0 | 0   | 0   | C |
| 3 | BICF2P245502           | 10055971 | C | 1   | 1   | A |
| 3 | BICF2P715712           | 10067941 | 0 | 0   | 0   | A |
| 3 | BICF2S23238701         | 10091291 | A | 0   | 0   | C |
| 3 | BICF2P1140981          | 10101122 | C | 1   | 1   | G |
| 3 | BICF2P533355           | 10115131 | C | 0.5 | 0.5 | A |
| 3 | BICF2S22943822         | 10120347 | G | 0   | 0   | A |
| 3 | BICF2P736471           | 10135700 | A | 0   | 0   | C |
| 3 | BICF2P610812           | 10160589 | 0 | 0   | 0   | A |
| 3 | BICF2P344170           | 10172367 | A | 0   | 0   | G |
| 3 | TIGRP2P36622_rs9183410 | 10188118 | A | 0   | 0   | G |
| 3 | BICF2P144764           | 10192064 | A | 1   | 1   | C |
| 3 | TIGRP2P36631_rs8783832 | 10221293 | G | 0   | 0   | A |
| 3 | BICF2P723714           | 10227835 | A | 1   | 1   | T |
| 3 | BICF2P761067           | 10236519 | A | 1   | 1   | C |
| 3 | BICF2S23319098         | 10250420 | A | 0   | 0   | G |
| 3 | BICF2S23020622         | 10264073 | A | 0   | 0   | G |
| 3 | BICF2P1216654          | 10275855 | G | 0   | 0   | A |
| 3 | BICF2P1162849          | 10285254 | G | 0   | 0   | A |
| 3 | BICF2P14296            | 10296328 | C | 0   | 0   | A |
| 3 | BICF2P1510622          | 10306292 | A | 0   | 0   | G |
| 3 | BICF2S231822           | 10326335 | G | 0   | 0   | A |
| 3 | BICF2P1330386          | 10328241 | G | 0   | 0   | A |
| 3 | TIGRP2P36683_rs8626297 | 10341071 | A | 0   | 0   | C |

|   |                        |          |   |     |     |   |
|---|------------------------|----------|---|-----|-----|---|
| 3 | BICF2P395505           | 10355292 | A | 0.5 | 0.5 | G |
| 3 | BICF2P901484           | 10372715 | 0 | 0   | 0   | A |
| 3 | BICF2P901485           | 10373289 | A | 0.5 | 0.5 | C |
| 3 | BICF2P999252           | 10384532 | G | 0.5 | 0.5 | A |
| 3 | BICF2P107402           | 10399716 | A | 0.5 | 0.5 | G |
| 3 | BICF2P594494           | 10430389 | C | 0.5 | 0.5 | A |
| 3 | BICF2P476249           | 10436969 | A | 0.5 | 0.5 | C |
| 3 | BICF2P822927           | 10452511 | G | 0.5 | 0.5 | A |
| 3 | TIGRP2P36715_rs8711082 | 10455881 | G | 0.5 | 0.5 | A |
| 3 | BICF2P370003           | 10468470 | G | 0.5 | 0.5 | A |
| 3 | BICF2P604268           | 10484925 | G | 0   | 0   | A |
| 3 | TIGRP2P36733_rs9090895 | 10488060 | G | 0.5 | 0.5 | A |
| 3 | BICF2P629147           | 10499521 | G | 0.5 | 0.5 | A |
| 3 | TIGRP2P36746_rs8772126 | 10512466 | A | 0   | 0   | G |
| 3 | BICF2P926937           | 10531115 | G | 0   | 0   | A |
| 3 | TIGRP2P36751_rs9193634 | 10543325 | A | 1   | 1   | G |
| 3 | BICF2P533876           | 10547662 | 0 | 0   | 0   | G |
| 3 | BICF2P403811           | 10566141 | G | 0   | 0   | A |
| 3 | BICF2P982386           | 10574372 | C | 1   | 1   | A |
| 3 | BICF2P1151110          | 10579925 | A | 1   | 1   | G |
| 3 | BICF2P919299           | 10583711 | G | 0   | 0   | A |
| 3 | BICF2P759842           | 10592323 | A | 1   | 1   | G |
| 3 | BICF2P819090           | 10598980 | A | 1   | 1   | G |
| 3 | BICF2P459711           | 10609988 | A | 0   | 0   | C |
| 3 | TIGRP2P36777_rs8579883 | 10618637 | G | 0   | 0   | A |
| 3 | BICF2P839933           | 10630359 | A | 0.5 | 0.5 | G |
| 3 | BICF2S22960543         | 10646996 | A | 0.5 | 0.5 | G |
| 3 | BICF2P512547           | 10655446 | 0 | 0   | 0   | G |
| 3 | TIGRP2P36804_rs8667668 | 10667871 | G | 0.5 | 0.5 | A |
| 3 | BICF2P180647           | 10683231 | G | 0.5 | 0.5 | A |
| 3 | BICF2P124146           | 10695322 | A | 0   | 0   | G |
| 3 | BICF2P738656           | 10717081 | 0 | 0   | 0   | G |
| 3 | BICF2P1028059          | 10727602 | G | 0   | 0   | A |
| 3 | BICF2P41627            | 10731878 | G | 0   | 0   | A |
| 3 | BICF2P674750           | 10751107 | G | 1   | 1   | A |
| 3 | BICF2P178694           | 10753798 | G | 1   | 1   | A |
| 3 | BICF2P736757           | 10767061 | G | 1   | 1   | A |
| 3 | BICF2P819554           | 10785940 | G | 0.5 | 0.5 | A |
| 3 | TIGRP2P36862_rs9078300 | 10788038 | G | 1   | 1   | A |
| 3 | BICF2P823912           | 10807515 | G | 0   | 0   | A |
| 3 | BICF2P1120851          | 10819591 | A | 0   | 0   | G |
| 3 | TIGRP2P36875_rs8966525 | 10829776 | G | 0   | 0   | A |
| 3 | BICF2P1125699          | 10833728 | G | 0.5 | 0.5 | A |
| 3 | BICF2S23121259         | 10848833 | G | 0.5 | 0.5 | A |
| 3 | BICF2P303472           | 10858968 | A | 0   | 0   | C |
| 3 | BICF2S2349428          | 10872213 | C | 1   | 1   | A |
| 3 | TIGRP2P36885_rs8763792 | 10886340 | A | 0.5 | 0.5 | G |

|   |                        |          |   |     |     |   |
|---|------------------------|----------|---|-----|-----|---|
| 3 | BICF2P1069225          | 10894273 | G | 0.5 | 0.5 | A |
| 3 | BICF2P192626           | 10902363 | G | 0   | 0   | A |
| 3 | BICF2P407904           | 10934470 | A | 0   | 0   | G |
| 3 | BICF2P786548           | 10953876 | A | 0   | 0   | G |
| 3 | BICF2S23026541         | 10967906 | C | 0   | 0   | A |
| 3 | BICF2P716758           | 10978842 | G | 0   | 0   | A |
| 3 | BICF2P648968           | 10999819 | G | 0   | 0   | A |
| 3 | BICF2P355091           | 11024892 | G | 0   | 0   | A |
| 3 | TIGRP2P36913_rs9074295 | 11031253 | A | 0   | 0   | G |
| 3 | BICF2P795341           | 11053726 | A | 0   | 0   | G |
| 3 | TIGRP2P36922_rs9028836 | 11063859 | G | 0   | 0   | A |
| 3 | TIGRP2P36926_rs8786180 | 11075791 | G | 0   | 0   | A |
| 3 | TIGRP2P36936_rs9137495 | 11093809 | A | 0   | 0   | T |
| 3 | BICF2P968794           | 11108039 | A | 0   | 0   | G |
| 3 | BICF2P968797           | 11109548 | C | 0   | 0   | A |
| 3 | BICF2S2337168          | 11111795 | G | 0   | 0   | A |
| 3 | TIGRP2P36944_rs8598010 | 11123567 | A | 0.5 | 0.5 | G |
| 3 | TIGRP2P36953_rs8559586 | 11132074 | A | 0   | 0   | C |
| 3 | BICF2P448370           | 11152865 | A | 0   | 0   | G |
| 3 | BICF2P503364           | 11159840 | G | 0   | 0   | A |
| 3 | BICF2S23158229         | 11171634 | A | 0.5 | 0.5 | C |
| 3 | BICF2P724585           | 11187415 | A | 0   | 0   | G |
| 3 | BICF2S22932515         | 11191297 | G | 0   | 0   | A |
| 3 | BICF2S23443419         | 11202424 | G | 0   | 0   | A |
| 3 | BICF2P893044           | 11212683 | A | 0   | 0   | G |
| 3 | BICF2P93678            | 11241077 | A | 0   | 0   | G |
| 3 | BICF2P696947           | 11256097 | A | 0   | 0   | C |
| 3 | BICF2P728680           | 11264446 | A | 0   | 0   | G |
| 3 | BICF2P785681           | 11270993 | A | 0   | 0   | G |
| 3 | BICF2P1040888          | 11285173 | G | 0   | 0   | A |
| 3 | BICF2P1063268          | 11295498 | A | 0   | 0   | C |
| 3 | BICF2P1277561          | 11305564 | G | 1   | 1   | A |
| 3 | BICF2P77485            | 11326527 | A | 0   | 0   | G |
| 3 | BICF2P77488            | 11327223 | G | 1   | 1   | A |
| 3 | BICF2P1295599          | 11337008 | A | 1   | 1   | G |
| 3 | BICF2P7036             | 11343553 | A | 0   | 0   | G |
| 3 | TIGRP2P37007_rs9095959 | 11360445 | G | 0   | 0   | A |
| 3 | BICF2P165491           | 11363967 | A | 0   | 0   | G |
| 3 | BICF2P423580           | 11383393 | 0 | 0   | 0   | A |
| 3 | BICF2S23326710         | 11386247 | A | 0.5 | 0.5 | G |
| 3 | BICF2P459172           | 11398372 | A | 1   | 1   | C |
| 3 | TIGRP2P37018_rs9229091 | 11409267 | G | 1   | 1   | A |
| 3 | BICF2P771589           | 11420033 | C | 1   | 1   | A |
| 3 | BICF2P1085025          | 11431074 | A | 0   | 0   | G |
| 3 | TIGRP2P37032_rs8579372 | 11448625 | 0 | 0   | 0   | G |
| 3 | BICF2P940908           | 11458192 | A | 0.5 | 0.5 | G |
| 3 | BICF2P210365           | 11467133 | A | 1   | 1   | G |

|   |                        |          |   |     |     |   |
|---|------------------------|----------|---|-----|-----|---|
| 3 | BICF2P574442           | 11480535 | A | 0   | 0   | G |
| 3 | BICF2P215968           | 11519852 | A | 0   | 0   | G |
| 3 | BICF2P366448           | 11534378 | G | 0.5 | 0.5 | A |
| 3 | BICF2P671174           | 11540377 | A | 0.5 | 0.5 | G |
| 3 | BICF2P233044           | 11546378 | 0 | 0   | 0   | A |
| 3 | BICF2P724577           | 11562857 | G | 0.5 | 0.5 | A |
| 3 | BICF2P428965           | 11580496 | G | 0.5 | 0.5 | A |
| 3 | BICF2P397686           | 11587215 | 0 | 0   | 0   | A |
| 3 | BICF2P1353167          | 11599231 | A | 0.5 | 0.5 | G |
| 3 | BICF2S23240631         | 11610468 | G | 0.5 | 0.5 | A |
| 3 | BICF2P462679           | 11637336 | G | 0.5 | 0.5 | A |
| 3 | BICF2P1234362          | 11642809 | G | 0.5 | 0.5 | A |
| 3 | BICF2P905533           | 11685513 | C | 0.5 | 0.5 | A |
| 3 | TIGRP2P37062_rs8620323 | 11697877 | G | 0   | 0   | A |
| 3 | BICF2P734604           | 11713985 | A | 0   | 0   | G |
| 3 | BICF2P211305           | 11741054 | 0 | 0   | 0   | A |
| 3 | BICF2P958827           | 11753329 | 0 | 0   | 0   | A |
| 3 | BICF2S23643570         | 11765779 | G | 0   | 0   | A |
| 3 | TIGRP2P37064_rs9027663 | 11781464 | G | 0.5 | 0.5 | A |
| 3 | TIGRP2P37066_rs8864371 | 11792182 | G | 0   | 0   | A |
| 3 | BICF2S23316437         | 11802184 | A | 0.5 | 0.5 | G |
| 3 | BICF2P451307           | 11817158 | 0 | 0   | 0   | A |
| 3 | BICF2P772232           | 11826877 | T | 0.5 | 0.5 | A |
| 3 | TIGRP2P37070_rs8801353 | 11839998 | 0 | 0   | 0   | C |
| 3 | BICF2P991961           | 11845844 | 0 | 0   | 0   | G |
| 3 | BICF2P1190915          | 11857309 | A | 0   | 0   | C |
| 3 | TIGRP2P37071_rs9237152 | 11874423 | 0 | 0   | 0   | A |
| 3 | BICF2S23424630         | 11890805 | A | 0   | 0   | T |
| 3 | BICF2P341630           | 11894226 | G | 0   | 0   | A |
| 3 | BICF2S23526145         | 11902752 | A | 0   | 0   | C |
| 3 | BICF2P44650            | 11917834 | A | 0   | 0   | G |
| 3 | BICF2S23329502         | 11960343 | A | 0   | 0   | C |
| 3 | BICF2P215327           | 11993227 | 0 | 0   | 0   | A |
| 3 | BICF2P1301193          | 12019245 | 0 | 0   | 0   | A |
| 3 | BICF2P1023944          | 12043963 | 0 | 0   | 0   | G |
| 3 | BICF2S2415265          | 12070746 | A | 0   | 0   | G |
| 3 | BICF2P132093           | 12078369 | A | 0   | 0   | G |
| 3 | BICF2P497244           | 12087796 | 0 | 0   | 0   | A |
| 3 | BICF2P97318            | 12100284 | A | 0   | 0   | C |
| 3 | BICF2P1170098          | 12111971 | A | 0   | 0   | T |
| 3 | BICF2P1108458          | 12122767 | G | 0   | 0   | A |
| 3 | BICF2S24512053         | 12142919 | 0 | 0   | 0   | A |
| 3 | BICF2P1356718          | 12152790 | 0 | 0   | 0   | A |
| 3 | BICF2P178933           | 12161552 | 0 | 0   | 0   | A |
| 3 | BICF2S23247040         | 12182362 | 0 | 0   | 0   | G |
| 3 | BICF2P1273390          | 12199344 | G | 0.5 | 0.5 | A |
| 3 | TIGRP2P37095_rs8781034 | 12207069 | A | 0.5 | 0.5 | C |

|   |                        |          |   |     |     |   |
|---|------------------------|----------|---|-----|-----|---|
| 3 | BICF2S23225857         | 12217142 | A | 0.5 | 0.5 | G |
| 3 | BICF2P943716           | 12224700 | 0 | 0   | 0   | T |
| 3 | BICF2S24110538         | 12238968 | C | 0   | 0   | A |
| 3 | BICF2P106465           | 12255919 | A | 0.5 | 0.5 | C |
| 3 | BICF2P1169041          | 12262363 | G | 1   | 1   | A |
| 3 | BICF2P344705           | 12270940 | A | 0.5 | 0.5 | G |
| 3 | TIGRP2P37102_rs8669940 | 12290222 | G | 0   | 0   | A |
| 3 | BICF2P1059276          | 12308017 | G | 0   | 0   | A |
| 3 | BICF2S23030474         | 12317340 | G | 1   | 1   | A |
| 3 | BICF2S2297571          | 12345445 | C | 0.5 | 0.5 | A |
| 3 | BICF2P172528           | 12354622 | G | 0.5 | 0.5 | A |
| 3 | BICF2P785100           | 12369838 | A | 0   | 0   | C |
| 3 | BICF2P326243           | 12382111 | A | 0.5 | 0.5 | G |
| 3 | BICF2S23524979         | 12388266 | A | 0.5 | 0.5 | C |
| 3 | BICF2P1250405          | 12400201 | C | 0   | 0   | A |
| 3 | BICF2P751259           | 12409828 | G | 1   | 1   | A |
| 3 | BICF2P1339840          | 12423171 | A | 1   | 1   | G |
| 3 | BICF2P460206           | 12439348 | A | 0   | 0   | G |
| 3 | BICF2P616721           | 12449359 | A | 1   | 1   | G |
| 3 | BICF2S23426432         | 12456791 | A | 0   | 0   | G |
| 3 | BICF2P18052            | 12471917 | G | 1   | 1   | A |
| 3 | BICF2P1105887          | 12482219 | G | 0   | 0   | A |
| 3 | BICF2P403216           | 12496007 | G | 0.5 | 0.5 | A |
| 3 | BICF2P699633           | 12501694 | G | 0.5 | 0.5 | A |
| 3 | BICF2S23347332         | 12521142 | A | 0   | 0   | G |
| 3 | BICF2S24410955         | 12527343 | G | 0   | 0   | A |
| 3 | BICF2P748769           | 12551373 | C | 0   | 0   | A |
| 3 | TIGRP2P37166_rs8932843 | 12564262 | A | 0   | 0   | G |
| 3 | TIGRP2P37176_rs9016831 | 12577361 | A | 0   | 0   | G |
| 3 | BICF2P846462           | 12582638 | G | 0   | 0   | A |
| 3 | BICF2P686189           | 12594004 | G | 0   | 0   | A |
| 3 | BICF2P1110909          | 12601092 | A | 0.5 | 0.5 | C |
| 3 | BICF2P1424985          | 12609145 | A | 0   | 0   | G |
| 3 | TIGRP2P37188_rs8901932 | 12615634 | A | 0   | 0   | G |
| 3 | BICF2S23322147         | 12631338 | A | 0.5 | 0.5 | G |
| 3 | BICF2S23238427         | 12640495 | A | 0.5 | 0.5 | G |
| 3 | BICF2P219067           | 12653764 | C | 0   | 0   | A |
| 3 | TIGRP2P37194_rs9077372 | 12664215 | A | 0   | 0   | T |
| 3 | BICF2P713806           | 12674721 | A | 0   | 0   | G |
| 3 | BICF2S23328242         | 12693619 | A | 0.5 | 0.5 | G |
| 3 | BICF2P459546           | 12698199 | 0 | 0   | 0   | G |
| 3 | BICF2S23436266         | 12733324 | G | 0   | 0   | A |
| 3 | BICF2P921776           | 12744983 | A | 0   | 0   | G |
| 3 | BICF2P662839           | 12755989 | 0 | 0   | 0   | A |
| 3 | BICF2S23519256         | 12780796 | A | 0.5 | 0.5 | G |
| 3 | BICF2S23318729         | 12853720 | G | 1   | 1   | C |
| 3 | BICF2P1113376          | 12859465 | A | 1   | 1   | G |

|   |                        |          |   |     |        |   |
|---|------------------------|----------|---|-----|--------|---|
| 3 | BICF2P372137           | 12879035 | 0 | 0   | 0      | G |
| 3 | BICF2P973463           | 12881665 | A | 1   | 1      | G |
| 3 | TIGRP2P37212_rs9195774 | 12897223 | G | 1   | 1      | A |
| 3 | TIGRP2P37215_rs9023022 | 12912100 | G | 1   | 1      | A |
| 3 | BICF2S23528652         | 12914872 | G | 0   | 0      | A |
| 3 | TIGRP2P37218_rs8525632 | 12935358 | A | 1   | 1      | G |
| 3 | BICF2S23551091         | 12947793 | G | 0.5 | 0.5    | C |
| 3 | BICF2S23551310         | 12951458 | A | 0.5 | 0.5    | G |
| 3 | BICF2P840255           | 12960968 | G | 1   | 1      | A |
| 3 | TIGRP2P37232_rs9114409 | 12982300 | A | 1   | 1      | G |
| 3 | BICF2P149851           | 12984151 | A | 0.5 | 0.5    | G |
| 3 | TIGRP2P37246_rs8856738 | 13001529 | A | 0.5 | 0.5    | G |
| 3 | TIGRP2P37258_rs8559316 | 13038213 | A | 0   | 0      | G |
| 3 | BICF2S23524855         | 13043288 | G | 0.5 | 0.5    | A |
| 3 | BICF2P424454           | 13077394 | C | 0   | 0      | A |
| 3 | TIGRP2P37271_rs9149830 | 13085445 | C | 0   | 0      | A |
| 3 | BICF2P1319182          | 13091739 | A | 0   | 0      | G |
| 3 | BICF2P536548           | 13117102 | 0 | 0   | 0      | A |
| 3 | BICF2S2399705          | 13137570 | G | 0.5 | 0.5    | A |
| 3 | BICF2S23327505         | 13147375 | G | 0.5 | 0.5    | A |
| 3 | BICF2S23214697         | 13185909 | A | 0   | 0      | G |
| 3 | BICF2S23424050         | 13193117 | G | 0   | 0      | A |
| 3 | TIGRP2P37283_rs8526227 | 13204082 | A | 0   | 0      | G |
| 3 | BICF2P1062023          | 13221751 | A | 0   | 0      | G |
| 3 | TIGRP2P37294_rs8555020 | 13228173 | G | 0   | 0      | A |
| 3 | BICF2P1188267          | 13237535 | A | 0.5 | 0.5    | C |
| 3 | BICF2P1174418          | 13253218 | A | 0.5 | 0.5    | G |
| 3 | TIGRP2P37299_rs9096243 | 13261835 | A | 0.5 | 0.5    | G |
| 3 | BICF2P520575           | 13272443 | 0 | 0   | 0      | G |
| 3 | BICF2P234820           | 13286037 | C | 0.5 | 0.5    | A |
| 3 | BICF2P455088           | 13300166 | G | 0.5 | 0.5    | A |
| 3 | BICF2P725253           | 13316914 | A | 0.5 | 0.5    | G |
| 3 | BICF2P1003142          | 13328828 | 0 | 0   | 0      | G |
| 3 | BICF2P426873           | 13345865 | G | 0.5 | 0.5    | A |
| 3 | BICF2P322969           | 13354710 | A | 0.5 | 0.5    | G |
| 3 | TIGRP2P37320_rs8620438 | 13372831 | G | 0   | 0      | A |
| 3 | BICF2P855574           | 13380299 | A | 0   | 0      | G |
| 3 | BICF2P460115           | 13395568 | G | 0.5 | 0.5    | A |
| 3 | BICF2P1405260          | 13409084 | C | 0   | 0      | G |
| 3 | BICF2S2338262          | 13439674 | C | 0.5 | 0.5    | A |
| 3 | BICF2P511129           | 13449536 | A | 0.5 | 0.5    | G |
| 3 | BICF2P414180           | 13456753 | A | 0.5 | 0.2857 | T |
| 3 | BICF2S23119273         | 13469170 | C | 0.5 | 0.2857 | A |
| 3 | BICF2P285817           | 13480409 | A | 0   | 0      | G |
| 3 | BICF2P1022802          | 13491070 | A | 0   | 0.2143 | G |
| 3 | TIGRP2P37369_rs8977768 | 13506748 | G | 0   | 0.2143 | A |
| 3 | BICF2P184748           | 13519752 | A | 0   | 0      | G |



|   |                        |          |   |     |        |   |
|---|------------------------|----------|---|-----|--------|---|
| 3 | TIGRP2P37379_rs9097265 | 13527575 | A | 0.5 | 0.5    | G |
| 3 | BICF2P30406            | 13546592 | A | 0   | 0      | G |
| 3 | BICF2S2306288          | 13549313 | A | 0.5 | 0.5    | G |
| 3 | TIGRP2P37392_rs9160368 | 13565145 | A | 0   | 0      | G |
| 3 | BICF2P216447           | 13565285 | A | 0   | 0      | C |
| 3 | BICF2P1241810          | 13569459 | A | 1   | 0.7857 | G |
| 3 | BICF2P1026277          | 13576155 | G | 0   | 0      | A |
| 3 | BICF2P1441940          | 13581887 | G | 0   | 0      | A |
| 3 | BICF2P820082           | 13604439 | A | 0.5 | 0.7143 | G |
| 3 | BICF2P122967           | 13608948 | A | 0   | 0      | G |
| 3 | BICF2P808674           | 13618358 | A | 0.5 | 0.7143 | G |
| 3 | BICF2P229390           | 13631883 | A | 0.5 | 0.2857 | C |
| 3 | TIGRP2P37403_rs8806468 | 13646981 | A | 0.5 | 0.2857 | G |
| 3 | BICF2P450187           | 13658271 | A | 0   | 0      | C |
| 3 | BICF2P450189           | 13658340 | G | 0.5 | 0.2857 | A |
| 3 | BICF2S23619751         | 13658602 | A | 0   | 0      | C |
| 3 | BICF2S2315014          | 13671386 | A | 1   | 0.7857 | G |
| 3 | BICF2S23349562         | 13682845 | A | 0.5 | 0.2857 | C |
| 3 | BICF2P410181           | 13685564 | G | 0.5 | 0.5    | A |
| 3 | BICF2P780674           | 13697080 | A | 0.5 | 0.5    | G |
| 3 | BICF2S23523926         | 13711408 | C | 0.5 | 0.5    | A |
| 3 | BICF2P353177           | 13721819 | A | 0   | 0      | G |
| 3 | BICF2P9189             | 13739068 | A | 0   | 0      | G |
| 3 | TIGRP2P37429_rs8511689 | 13742697 | A | 0   | 0.2143 | G |
| 3 | BICF2P1469511          | 13757471 | A | 0   | 0      | T |
| 3 | BICF2P384752           | 13771505 | A | 0   | 0      | G |
| 3 | TIGRP2P37451_rs8795953 | 13778843 | A | 0   | 0      | G |
| 3 | BICF2P929809           | 13790079 | A | 0.5 | 0.5    | G |
| 3 | BICF2P179192           | 13801482 | C | 0.5 | 0.5    | A |
| 3 | BICF2P823113           | 13811859 | A | 0.5 | 0.7143 | G |
| 3 | TIGRP2P37485_rs8664065 | 13824411 | G | 0   | 0      | A |
| 3 | BICF2P552674           | 13841897 | C | 0.5 | 0.7143 | A |
| 3 | BICF2P309148           | 13854567 | G | 0   | 0      | A |
| 3 | BICF2P698836           | 13860062 | A | 0.5 | 0.7143 | C |
| 3 | BICF2P1194771          | 13879127 | A | 0.5 | 0.7143 | G |
| 3 | BICF2P740885           | 13889231 | G | 0.5 | 0.7143 | A |
| 3 | BICF2P889516           | 13894319 | T | 0   | 0.2143 | A |
| 3 | BICF2P177046           | 13914621 | 0 | 0   | 0      | A |
| 3 | BICF2S23746636         | 13922790 | G | 0.5 | 0.7143 | A |
| 3 | BICF2P737878           | 13928418 | A | 0   | 0      | G |
| 3 | BICF2S22959231         | 13941421 | G | 0   | 0      | A |
| 3 | BICF2P604997           | 13949858 | A | 0.5 | 0.2857 | G |
| 3 | TIGRP2P37527_rs8792455 | 13962757 | 0 | 0   | 0      | G |
| 3 | BICF2S23434865         | 13975174 | A | 0   | 0      | G |
| 3 | BICF2S23419459         | 13985920 | A | NA  | 0.5    | C |
| 3 | BICF2S23435114         | 13999480 | C | 0   | 0      | A |
| 3 | BICF2P1368174          | 14011930 | G | 1   | 0.7857 | A |

|   |                        |          |   |     |        |   |
|---|------------------------|----------|---|-----|--------|---|
| 3 | TIGRP2P37531_rs8980563 | 14025263 | A | 0   | 0      | T |
| 3 | BICF2P174751           | 14039542 | G | 0   | 0.2143 | A |
| 3 | BICF2S22923775         | 14043537 | A | 0   | 0      | G |
| 3 | BICF2P38302            | 14069150 | T | 0.5 | 0.5    | A |
| 3 | BICF2P305584           | 14080267 | C | 0.5 | 0.5    | A |
| 3 | BICF2P774739           | 14091049 | A | 0.5 | 0.5    | G |
| 3 | BICF2P965349           | 14102906 | A | 0   | 0      | G |
| 3 | BICF2P496677           | 14124304 | A | 0   | 0.2143 | C |
| 3 | BICF2P385811           | 14134060 | A | 0.5 | 0.2857 | G |
| 3 | BICF2P568033           | 14140274 | A | 0.5 | 0.5    | G |
| 3 | BICF2P1177107          | 14151945 | A | 0   | 0      | G |
| 3 | BICF2P445195           | 14167357 | A | 0.5 | 0.2857 | G |
| 3 | BICF2P928962           | 14174447 | G | 0.5 | 0.2857 | A |
| 3 | BICF2P309787           | 14191817 | G | 0.5 | 0.5    | A |
| 3 | BICF2P67682            | 14206524 | A | 0.5 | 0.5    | C |
| 3 | BICF2P926118           | 14216112 | 0 | 0   | 0      | A |
| 3 | BICF2P859855           | 14233838 | A | 0.5 | 0.5    | G |
| 3 | BICF2P1170805          | 14265391 | A | 1   | 0.7857 | G |
| 3 | BICF2P1464897          | 14274245 | A | 1   | 0.7857 | G |
| 3 | TIGRP2P37620_rs8875131 | 14291149 | A | 0   | 0      | G |
| 3 | BICF2P1122319          | 14295057 | A | 0.5 | 0.5    | G |
| 3 | BICF2P2166             | 14307665 | G | 0.5 | 0.2857 | A |
| 3 | BICF2P963113           | 14325254 | 0 | 0   | 0      | A |
| 3 | BICF2P1400155          | 14330281 | G | 0.5 | 0.5    | A |
| 3 | BICF2S23425352         | 14357509 | A | 0.5 | 0.7143 | G |
| 3 | BICF2P1116208          | 14366542 | G | 0.5 | 0.5    | A |
| 3 | BICF2P261911           | 14386278 | G | 0   | 0      | A |
| 3 | BICF2S23211846         | 14399060 | G | 0   | 0.2143 | A |
| 3 | BICF2S2356607          | 14413388 | A | 1   | 0.7857 | G |
| 3 | BICF2P1142695          | 14422933 | 0 | 0   | 0      | A |
| 3 | TIGRP2P37633_rs8898064 | 14432992 | G | 0.5 | 0.25   | A |
| 3 | BICF2S2358620          | 14445552 | A | 0.5 | 0.2857 | G |
| 3 | BICF2S23546324         | 14456853 | G | 0.5 | 0.2857 | A |
| 3 | BICF2S23340205         | 14467151 | G | 0.5 | 0.25   | A |
| 3 | BICF2P327677           | 14487665 | G | 0.5 | 0.5    | A |
| 3 | BICF2P1004368          | 14495103 | G | 0.5 | 0.5    | A |
| 3 | BICF2S23055617         | 14505900 | A | 0   | 0      | G |
| 3 | BICF2P226096           | 14517798 | 0 | 0   | 0      | A |
| 3 | BICF2P1461292          | 14539916 | A | 0   | 0      | G |
| 3 | BICF2S23710973         | 14551192 | A | 1   | 0.7857 | G |
| 3 | BICF2P447550           | 14563241 | G | 0   | 0      | A |
| 3 | BICF2P283440           | 14578210 | G | 0   | 0      | A |
| 3 | BICF2P996183           | 14585741 | A | 0   | 0      | G |
| 3 | BICF2S23210201         | 14596954 | C | 0   | 0      | A |
| 3 | BICF2P467774           | 14607123 | A | 0.5 | 0.2857 | G |
| 3 | BICF2S2322937          | 14625123 | G | 0   | 0.2143 | A |
| 3 | TIGRP2P37703_rs8543293 | 14631607 | A | 0   | 0.2143 | G |

|   |                        |          |   |     |        |   |
|---|------------------------|----------|---|-----|--------|---|
| 3 | BICF2P1335336          | 14642087 | 0 | 0   | 0      | A |
| 3 | TIGRP2P37711_rs8831890 | 14662642 | 0 | 0   | 0      | G |
| 3 | BICF2P940625           | 14680231 | G | 0   | 0      | A |
| 3 | BICF2P685806           | 14687467 | G | 0   | 0      | A |
| 3 | BICF2P529279           | 14705033 | A | 0   | 0      | C |
| 3 | TIGRP2P37732_rs9039278 | 14714478 | G | 0.5 | 0.5    | A |
| 3 | BICF2P958553           | 14726803 | G | 0   | 0      | A |
| 3 | TIGRP2P37738_rs8866173 | 14735828 | A | 0   | 0.2143 | G |
| 3 | TIGRP2P37743_rs9243592 | 14747609 | 0 | 0   | 0      | A |
| 3 | BICF2P331050           | 14761741 | G | 0   | 0.2143 | A |
| 3 | BICF2P1218685          | 14767196 | A | 0.5 | 0.7143 | G |
| 3 | TIGRP2P37758_rs8588906 | 14778714 | A | 0   | 0.2143 | T |
| 3 | BICF2P1332205          | 14779102 | G | 0.5 | 0.7143 | A |
| 3 | BICF2P840661           | 14789546 | G | 0.5 | 0.5    | A |
| 3 | TIGRP2P37772_rs8887964 | 14803833 | A | 0.5 | 0.75   | G |
| 3 | TIGRP2P37775_rs9185133 | 14813424 | A | 0.5 | 0.7143 | G |
| 3 | BICF2P1124139          | 14834366 | A | 0   | 0      | G |
| 3 | TIGRP2P37784_rs8915307 | 14837412 | A | 0.5 | 0.7143 | C |
| 3 | BICF2P729215           | 14848270 | G | 0.5 | 0.2857 | A |
| 3 | TIGRP2P37803_rs9175644 | 14861433 | A | 0.5 | 0.5    | C |
| 3 | BICF2P621814           | 14875236 | G | 0.5 | 0.5    | A |
| 3 | TIGRP2P37817_rs8563529 | 14882121 | A | 0.5 | 0.2857 | G |
| 3 | TIGRP2P37821_rs9054568 | 14896097 | A | 1   | 0.7857 | G |
| 3 | TIGRP2P37822_rs8693004 | 14904525 | C | 0.5 | 0.2857 | A |
| 3 | BICF2P1257029          | 14925319 | G | 0   | 0      | A |
| 3 | BICF2P1468579          | 14930724 | A | 0.5 | 0.2857 | G |
| 3 | TIGRP2P37847_rs9214771 | 14941944 | G | 0.5 | 0.2857 | A |
| 3 | BICF2P1197951          | 14954251 | A | 0   | 0      | C |
| 3 | BICF2P550345           | 14962091 | A | 0   | 0      | G |
| 3 | BICF2P1350589          | 14980066 | A | 0   | 0      | G |
| 3 | TIGRP2P37867_rs9085019 | 14995054 | A | 0   | 0      | G |
| 3 | BICF2P443733           | 15006230 | G | 0   | 0      | A |
| 3 | BICF2P983169           | 15013438 | C | 0.5 | 0.5    | A |
| 3 | BICF2P1002948          | 15024671 | 0 | 0   | 0      | A |
| 3 | TIGRP2P37876_rs8678983 | 15038866 | 0 | 0   | 0      | T |
| 3 | BICF2S23528641         | 15044346 | G | 0   | 0      | A |
| 3 | BICF2P834479           | 15070221 | G | 1   | 1      | A |
| 3 | BICF2S22937557         | 15085973 | G | 0   | 0      | A |
| 3 | BICF2P367069           | 15099144 | A | 1   | 1      | G |
| 3 | TIGRP2P37888_rs9232957 | 15102813 | A | 0   | 0      | C |
| 3 | BICF2P575140           | 15118998 | C | 0   | 0      | A |
| 3 | TIGRP2P37911_rs9133602 | 15151502 | G | 0.5 | 0.5    | A |
| 3 | TIGRP2P37920_rs8865094 | 15164324 | A | 0   | 0      | G |
| 3 | BICF2P319805           | 15179109 | 0 | 0   | 0      | G |
| 3 | TIGRP2P37923_rs9170596 | 15188459 | G | 0   | 0.2143 | A |
| 3 | BICF2P245913           | 15196378 | A | 1   | 1      | T |
| 3 | BICF2S23013284         | 15206454 | A | 0   | 0      | G |

|   |                        |          |   |     |        |   |
|---|------------------------|----------|---|-----|--------|---|
| 3 | BICF2P482686           | 15214741 | G | 1   | 1      | A |
| 3 | BICF2P786284           | 15227152 | G | 0.5 | 0.5    | A |
| 3 | BICF2P706828           | 15247041 | A | 0   | 0.2143 | G |
| 3 | BICF2P1029008          | 15251459 | A | 0.5 | 0.7143 | C |
| 3 | BICF2P243703           | 15268765 | G | 1   | 1      | A |
| 3 | TIGRP2P37956_rs9082632 | 15275111 | G | 1   | 1      | A |
| 3 | BICF2P1092722          | 15291114 | A | 0   | 0.2143 | G |
| 3 | BICF2P336524           | 15295187 | A | 0   | 0.2143 | G |
| 3 | BICF2P673257           | 15312564 | 0 | 0   | 0      | A |
| 3 | TIGRP2P37971_rs8641504 | 15333472 | 0 | 0   | 0      | A |
| 3 | TIGRP2P37982_rs8795704 | 15346326 | G | 0.5 | 0.5    | A |
| 3 | BICF2P447670           | 15371954 | 0 | 0   | 0      | A |
| 3 | BICF2P957135           | 15375907 | T | 0.5 | 0.5    | A |
| 3 | BICF2P436367           | 15387074 | G | 0.5 | 0.5    | A |
| 3 | BICF2P491037           | 15400209 | A | 0   | 0      | G |
| 3 | TIGRP2P37995_rs8755294 | 15413657 | 0 | 0   | 0      | G |
| 3 | BICF2S2377050          | 15422937 | G | 0   | 0      | A |
| 3 | BICF2S23423057         | 15433607 | A | 0   | 0      | G |
| 3 | TIGRP2P38008_rs8705495 | 15439503 | G | 0   | 0.2143 | A |
| 3 | BICF2P424489           | 15446344 | A | 0   | 0.1667 | G |
| 3 | BICF2P424490           | 15446494 | G | 0   | 0.2143 | A |
| 3 | BICF2P789355           | 15460152 | A | 0   | 0.2143 | G |
| 3 | BICF2P464724           | 15473084 | A | 0   | 0      | C |
| 3 | BICF2P1349347          | 15482758 | G | 0   | 0.2143 | A |
| 3 | TIGRP2P38036_rs9146894 | 15494909 | A | 0   | 0.2143 | G |
| 3 | BICF2G630700972        | 15504843 | 0 | 0   | 0      | C |
| 3 | BICF2S2355060          | 15520955 | G | 0   | 0.2143 | A |
| 3 | BICF2P744681           | 15526315 | G | 0   | 0      | A |
| 3 | BICF2S23128637         | 15549531 | G | 0   | 0.1667 | A |
| 3 | BICF2S23128636         | 15549789 | A | 0   | 0      | G |
| 3 | BICF2G630700980        | 15560062 | C | 0.5 | 0.5    | A |
| 3 | BICF2G630700990        | 15573392 | A | 1   | 1      | G |
| 3 | BICF2G630701005        | 15586044 | G | 1   | 1      | A |
| 3 | BICF2G630701008        | 15595353 | C | 0   | 0.2143 | A |
| 3 | BICF2G630701024        | 15609259 | C | 0   | 0.2143 | A |
| 3 | BICF2G630701035        | 15618558 | A | 0   | 0.2143 | G |
| 3 | BICF2G630701052        | 15630142 | G | 0   | 0.2143 | A |
| 3 | BICF2G630701057        | 15643612 | A | 0   | 0.2143 | G |
| 3 | TIGRP2P38047_rs8889799 | 15657166 | G | 0.5 | 0.3333 | A |
| 3 | BICF2G630701064        | 15669428 | G | 0   | 0      | A |
| 3 | BICF2G630701077        | 15678826 | A | 0   | 0      | G |
| 3 | BICF2G630701099        | 15690259 | T | 0   | 0      | A |
| 3 | BICF2G630701116        | 15704246 | G | 0   | 0      | C |
| 3 | BICF2G630701126        | 15710578 | G | 1   | 1      | A |
| 3 | BICF2P402801           | 15721015 | A | 0   | 0      | G |
| 3 | BICF2G630701144        | 15732294 | A | 0   | 0      | G |
| 3 | BICF2G630701178        | 15762607 | G | 0.5 | 0.2857 | A |

|   |                        |          |   |     |        |   |
|---|------------------------|----------|---|-----|--------|---|
| 3 | BICF2P97074            | 15766977 | G | 0   | 0      | A |
| 3 | TIGRP2P38081_rs9190946 | 15784064 | A | 0.5 | 0.5    | G |
| 3 | BICF2P598598           | 15791297 | A | 1   | 1      | C |
| 3 | TIGRP2P38086_rs8767234 | 15805838 | A | 0   | 0.2143 | G |
| 3 | BICF2G630701265        | 15814891 | A | 0   | 0.2143 | G |
| 3 | BICF2G630701271        | 15824147 | A | 0   | 0      | C |
| 3 | BICF2G630701275        | 15836679 | A | 0.5 | 0.5    | C |
| 3 | BICF2G630701280        | 15854437 | A | 0.5 | 0.2857 | C |
| 3 | BICF2S23619860         | 15868283 | A | 0   | 0      | C |
| 3 | BICF2P1016953          | 15874174 | G | 0.5 | 0.2857 | A |
| 3 | BICF2P1297261          | 15879595 | A | 0   | 0      | T |
| 3 | TIGRP2P38098_rs8496083 | 15882608 | A | 0   | 0      | G |
| 3 | BICF2S23242270         | 15899066 | A | 0.5 | 0.5    | G |
| 3 | BICF2S23314277         | 15906753 | A | 0   | 0      | C |
| 3 | BICF2P710687           | 15918810 | A | 0   | 0      | G |
| 3 | BICF2P595641           | 15928869 | 0 | 0   | 0      | A |
| 3 | TIGRP2P38112_rs9067919 | 15947008 | G | 0   | 0      | A |
| 3 | TIGRP2P38118_rs8667303 | 15955148 | A | 0   | 0      | G |
| 3 | BICF2S23042954         | 15969274 | A | 1   | 1      | G |
| 3 | TIGRP2P38131_rs9101351 | 15984851 | A | 0   | 0      | G |
| 3 | BICF2S23444456         | 15991418 | A | 0.5 | 0.2143 | G |
| 3 | BICF2P869625           | 15999864 | C | 0   | 0.5    | A |
| 3 | TIGRP2P38139_rs9021354 | 16008385 | G | 0   | 0      | A |
| 3 | TIGRP2P38144_rs9105483 | 16019566 | A | 0   | 0      | G |
| 3 | BICF2P357969           | 16037988 | G | 0.5 | 0.7857 | A |
| 3 | BICF2P864287           | 16043247 | A | 0   | 0      | G |
| 3 | BICF2P606956           | 16056402 | G | 0   | 0.5    | A |
| 3 | BICF2P643809           | 16066704 | G | 0   | 0.5    | A |
| 3 | BICF2P350462           | 16083428 | A | 0   | 0      | G |
| 3 | BICF2P740970           | 16088549 | G | 0   | 0      | A |
| 3 | BICF2P674534           | 16105975 | G | 0.5 | 0.7143 | A |
| 3 | BICF2P455696           | 16111760 | G | 0   | 0      | A |
| 3 | BICF2P868828           | 16130996 | A | 0   | 0      | G |
| 3 | TIGRP2P38179_rs9093463 | 16137102 | A | 0   | 0      | G |
| 3 | TIGRP2P38184_rs9022398 | 16152015 | A | NA  | 0.875  | G |
| 3 | BICF2P1165882          | 16163393 | G | 0.5 | 0.7143 | A |
| 3 | TIGRP2P38197_rs8902626 | 16173747 | A | 1   | 0.5    | G |
| 3 | TIGRP2P38200_rs9020103 | 16181606 | A | 1   | 0.5    | G |
| 3 | BICF2S23120382         | 16198306 | A | 0   | 0.5    | G |
| 3 | BICF2P256997           | 16209690 | A | 0   | 0      | G |
| 3 | BICF2P120703           | 16224441 | A | 0.5 | 0.2143 | C |
| 3 | BICF2P1510439          | 16228061 | A | 0.5 | 0.2143 | G |
| 3 | BICF2P72855            | 16240165 | A | NA  | 0.1    | G |
| 3 | BICF2G630701313        | 16252554 | G | 0.5 | 0.2143 | A |
| 3 | BICF2P342472           | 16264048 | A | 0.5 | 0.2143 | G |
| 3 | BICF2G630701332        | 16275404 | G | 0.5 | 0.2143 | A |
| 3 | TIGRP2P38224_rs8700342 | 16285670 | 0 | 0   | 0      | A |

|   |                        |          |   |     |        |   |
|---|------------------------|----------|---|-----|--------|---|
| 3 | BICF2G630701350        | 16297901 | G | 0   | 0      | A |
| 3 | BICF2G630701358        | 16307641 | G | 0   | 0      | A |
| 3 | BICF2G630701366        | 16322301 | G | 0   | 0      | A |
| 3 | BICF2G630701373        | 16336059 | A | 0   | 0      | G |
| 3 | BICF2S23240830         | 16352815 | 0 | 0   | 0      | C |
| 3 | BICF2P1121302          | 16355254 | G | 1   | 0.5    | A |
| 3 | BICF2S23025632         | 16382670 | A | 0   | 0      | G |
| 3 | BICF2G630701430        | 16395011 | A | 0   | 0      | G |
| 3 | BICF2G630701448        | 16407852 | G | 0   | 0      | A |
| 3 | BICF2G630701454        | 16412476 | G | 0   | 0      | A |
| 3 | BICF2G630701475        | 16432023 | A | 0   | 0      | T |
| 3 | BICF2G630701477        | 16443933 | C | 0   | 0      | A |
| 3 | BICF2G630701481        | 16448993 | G | 0   | 0      | A |
| 3 | BICF2G630701495        | 16456914 | A | 1   | 0.5    | C |
| 3 | BICF2G630701514        | 16494323 | G | 0   | 0      | A |
| 3 | BICF2G630701527        | 16510274 | G | 1   | 0.5    | A |
| 3 | BICF2G630701538        | 16515631 | A | 0   | 0      | G |
| 3 | BICF2G630701556        | 16525965 | G | 1   | 0.5    | A |
| 3 | BICF2G630701589        | 16538375 | G | 1   | 0.5    | A |
| 3 | BICF2S22915658         | 16558921 | A | 1   | 1      | G |
| 3 | BICF2P628433           | 16575267 | 0 | 0   | 0      | C |
| 3 | BICF2P90664            | 16593361 | 0 | 0   | 0      | G |
| 3 | TIGRP2P38234_rs8917540 | 16609219 | 0 | 0   | 0      | A |
| 3 | BICF2G630701597        | 16628007 | G | 0   | 0      | A |
| 3 | BICF2P1388375          | 16651590 | C | 0.5 | 0.2857 | A |
| 3 | BICF2G630701602        | 16652435 | 0 | 0   | 0      | A |
| 3 | BICF2G630701627        | 16665544 | 0 | 0   | 0      | G |
| 3 | BICF2S23220688         | 16680382 | A | 0.5 | 0.7857 | G |
| 3 | BICF2G630701658        | 16686887 | C | 0.5 | 0.7857 | A |
| 3 | TIGRP2P38248_rs8968268 | 16701836 | G | 0.5 | 0.7857 | A |
| 3 | BICF2P612973           | 16710369 | 0 | 0   | 0      | G |
| 3 | BICF2G630701677        | 16721840 | G | 0   | 0      | A |
| 3 | BICF2S22947691         | 16734435 | G | 0.5 | 0.7857 | A |
| 3 | BICF2G630701687        | 16747091 | A | 0   | 0      | G |
| 3 | BICF2G630701695        | 16789517 | G | 0   | 0      | A |
| 3 | TIGRP2P38258_rs8817286 | 16790441 | A | 0.5 | 0.2143 | G |
| 3 | BICF2G630701706        | 16802889 | G | 0.5 | 0.2143 | A |
| 3 | BICF2S23736176         | 16821205 | G | 0.5 | 0.2143 | A |
| 3 | BICF2S24114087         | 16841237 | G | 0.5 | 0.2143 | A |
| 3 | BICF2G630701711        | 16854573 | G | 0.5 | 0.2143 | A |
| 3 | BICF2G630701714        | 16860523 | C | 0   | 0      | A |
| 3 | BICF2P1310360          | 16885023 | G | 0.5 | 0.1667 | A |
| 3 | BICF2P905908           | 16901027 | A | 0.5 | 0.2143 | G |
| 3 | BICF2P320638           | 16906165 | 0 | 0   | 0      | C |
| 3 | BICF2G630701715        | 16930588 | 0 | 0   | 0      | G |
| 3 | TIGRP2P38281_rs8816629 | 16946976 | 0 | 0   | 0      | A |
| 3 | BICF2P1337044          | 16969949 | 0 | 0   | 0      | C |

|   |                        |          |   |     |        |   |
|---|------------------------|----------|---|-----|--------|---|
| 3 | TIGRP2P38282_rs9010377 | 16992536 | 0 | 0   | 0      | A |
| 3 | TIGRP2P38283_rs8897540 | 17029727 | 0 | 0   | 0      | A |
| 3 | BICF2P216233           | 17037264 | A | 0   | 0      | G |
| 3 | BICF2P145991           | 17054184 | T | 0.5 | 0.2857 | A |
| 3 | BICF2G630701724        | 17061906 | A | 1   | 0.5    | G |
| 3 | BICF2P1395755          | 17070803 | G | 1   | 0.5    | A |
| 3 | BICF2G630701743        | 17079867 | A | 0   | 0.5    | C |
| 3 | BICF2G630701744        | 17089857 | G | 0   | 0      | A |
| 3 | BICF2P1244232          | 17101493 | C | 0.5 | 0.2143 | A |
| 3 | BICF2P40461            | 17117918 | 0 | 0   | 0      | A |
| 3 | BICF2S2439627          | 17127453 | A | 0.5 | 0.2857 | G |
| 3 | BICF2G630701747        | 17138300 | C | 0.5 | 0.2857 | A |
| 3 | BICF2P990365           | 17153177 | G | 1   | 0.5    | A |
| 3 | BICF2P276148           | 17159780 | A | 0   | 0      | G |
| 3 | BICF2P421915           | 17173176 | G | 0   | 0      | A |
| 3 | BICF2P611780           | 17176510 | A | 0   | 0      | G |
| 3 | BICF2G630701750        | 17184292 | A | 0.5 | 0.7857 | G |
| 3 | BICF2G630701765        | 17197794 | G | 0.5 | 0.2143 | A |
| 3 | BICF2G630701768        | 17210369 | G | 0   | 0      | A |
| 3 | BICF2G630701790        | 17222007 | C | 0   | 0      | A |
| 3 | BICF2G630701806        | 17231092 | G | 0   | 0      | A |
| 3 | BICF2G630701840        | 17245761 | G | 0   | 0      | A |
| 3 | BICF2G630701844        | 17256259 | C | 0   | 0      | A |
| 3 | BICF2G630701858        | 17265880 | 0 | 0   | 0      | A |
| 3 | BICF2G630701877        | 17273888 | C | 1   | 0.5    | A |
| 3 | BICF2S23453477         | 17285656 | 0 | 0   | 0      | G |
| 3 | BICF2G630701953        | 17296351 | A | 0.5 | 0.2143 | G |
| 3 | BICF2S23745471         | 17307748 | A | 0.5 | 0.2143 | G |
| 3 | BICF2G630702025        | 17330829 | A | 0   | 0      | G |
| 3 | BICF2G630702063        | 17348248 | A | 0   | 0.5    | G |
| 3 | BICF2S2342009          | 17355972 | A | 0   | 0      | G |
| 3 | BICF2P1101075          | 17368907 | A | 0   | 0      | G |
| 3 | BICF2S22950223         | 17383472 | A | 0   | 0.5    | G |
| 3 | BICF2P776868           | 17398083 | A | 0   | 0      | C |
| 3 | BICF2P180728           | 17405705 | G | 0   | 0      | A |
| 3 | BICF2P1281581          | 17416714 | G | 0.5 | 0.2857 | A |
| 3 | BICF2P1115233          | 17425357 | G | 1   | 0.5    | A |
| 3 | BICF2P1375792          | 17436361 | A | 1   | 0.5    | G |
| 3 | TIGRP2P38386_rs9192128 | 17451518 | G | 1   | 0.5    | A |
| 3 | BICF2P98993            | 17460549 | A | 0   | 0      | G |
| 3 | BICF2P997750           | 17479547 | A | 0   | 0      | G |
| 3 | BICF2P997752           | 17482017 | G | 0   | 0      | A |
| 3 | BICF2G630702079        | 17492054 | A | 0   | 0      | G |
| 3 | BICF2G630702084        | 17509067 | A | 0   | 0      | G |
| 3 | BICF2G630702090        | 17515666 | A | 0   | 0      | G |
| 3 | BICF2G630702114        | 17533787 | G | 0.5 | 0.2857 | A |
| 3 | BICF2G630702118        | 17539242 | A | 0.5 | 0.2857 | G |

|   |                 |          |   |     |        |   |
|---|-----------------|----------|---|-----|--------|---|
| 3 | BICF2G630702119 | 17539378 | A | 0.5 | 0.2857 | C |
| 3 | BICF2P555321    | 17545790 | A | 0   | 0      | T |
| 3 | BICF2G630702131 | 17552546 | C | 0.5 | 0.2857 | A |
| 3 | BICF2G630702150 | 17575057 | 0 | 0   | 0      | G |
| 3 | BICF2G630702156 | 17585963 | G | 0   | 0      | A |
| 3 | BICF2G630702157 | 17603451 | A | 0   | 0      | G |
| 3 | BICF2P821332    | 17612185 | G | 0   | 0      | A |
| 3 | BICF2G630702165 | 17621701 | C | 0   | 0      | A |
| 3 | BICF2G630702179 | 17634897 | A | 0   | 0      | G |
| 3 | BICF2P196662    | 17635661 | G | 0   | 0      | A |
| 3 | BICF2G630702190 | 17647483 | 0 | 0   | 0      | G |
| 3 | BICF2P1444739   | 17662566 | A | 1   | 1      | G |
| 3 | BICF2P475608    | 17667242 | G | 0.5 | 0.2857 | A |
| 3 | BICF2G630702222 | 17680894 | A | 0   | 0      | C |
| 3 | BICF2G630702225 | 17689693 | G | 0   | 0      | A |
| 3 | BICF2G630702234 | 17699781 | G | 0   | 0      | A |
| 3 | BICF2G630702244 | 17715101 | G | 0   | 0      | A |
| 3 | BICF2G630702251 | 17729554 | A | 0   | 0      | G |
| 3 | BICF2G630702257 | 17737465 | G | 0   | 0      | A |
| 3 | BICF2G630702265 | 17747067 | C | 0   | 0      | A |
| 3 | BICF2P1410710   | 17777453 | A | 0   | 0.5    | G |
| 3 | BICF2P35462     | 17783692 | G | 0   | 0.5    | A |
| 3 | BICF2P1303390   | 17792179 | G | 0   | 0.5    | A |
| 3 | BICF2G630702314 | 17804733 | A | 0   | 0.5    | G |
| 3 | BICF2G630702316 | 17816096 | A | 0   | 0      | G |
| 3 | BICF2G630702321 | 17829098 | A | 0   | 0.5    | C |
| 3 | BICF2P557227    | 17841704 | 0 | 0   | 0      | A |
| 3 | BICF2G630702329 | 17856464 | A | 0   | 0.5    | T |
| 3 | BICF2P165111    | 17865317 | 0 | 0   | 0      | G |
| 3 | BICF2G630702337 | 17867401 | A | 0.5 | 0.7857 | G |
| 3 | BICF2G630702344 | 17876514 | A | 0   | 0      | G |
| 3 | BICF2S23017032  | 17885099 | C | 0.5 | 0.7857 | A |
| 3 | BICF2S23136763  | 17895783 | A | 0.5 | 0.2143 | G |
| 3 | BICF2S2412425   | 17915305 | A | 0.5 | 0.2143 | C |
| 3 | BICF2G630702365 | 17918227 | G | 0.5 | 0.7857 | A |
| 3 | BICF2G630702397 | 17930158 | A | 0   | 0.5    | G |
| 3 | BICF2G630702413 | 17942926 | G | 0.5 | 0.7857 | A |
| 3 | BICF2G630702427 | 17951755 | G | 0.5 | 0.7857 | A |
| 3 | BICF2P881868    | 17963647 | A | 0.5 | 0.7143 | C |
| 3 | BICF2G630702453 | 17979085 | A | 0.5 | 0.7143 | C |
| 3 | BICF2G630702467 | 17988892 | 0 | 0   | 0      | T |
| 3 | BICF2P1116681   | 17998098 | C | 1   | 0.5    | A |
| 3 | BICF2G630702480 | 18012399 | 0 | 0   | 0      | G |
| 3 | BICF2P155967    | 18033212 | A | 0.5 | 0.2857 | G |
| 3 | BICF2G630702501 | 18054602 | G | 0.5 | 0.2857 | A |
| 3 | BICF2G630702504 | 18060114 | G | 0.5 | 0.7857 | A |
| 3 | BICF2G630702516 | 18071770 | 0 | 0   | 0      | A |



|   |                        |          |   |     |        |   |
|---|------------------------|----------|---|-----|--------|---|
| 3 | BICF2G630702521        | 18078445 | 0 | 0   | 0      | A |
| 3 | BICF2G630702531        | 18093604 | G | 0   | 0.5    | A |
| 3 | BICF2G630702558        | 18116540 | G | 0   | 0.5    | A |
| 3 | TIGRP2P38460_rs9189734 | 18124789 | 0 | 0   | 0      | G |
| 3 | BICF2G630702562        | 18128825 | G | 0   | 0.5    | A |
| 3 | BICF2G630702576        | 18143520 | G | 0   | 0.5    | C |
| 3 | BICF2G630702582        | 18151730 | 0 | 0   | 0      | A |
| 3 | BICF2G630702604        | 18164856 | 0 | 0   | 0      | A |
| 3 | BICF2G630702605        | 18170238 | 0 | 0   | 0      | A |
| 3 | BICF2G630702608        | 18181987 | A | 0   | 0      | C |
| 3 | BICF2G630702622        | 18194758 | A | 0   | 0      | G |
| 3 | BICF2G630702632        | 18215016 | A | 0   | 0      | C |
| 3 | BICF2G630702634        | 18216692 | A | 0   | 0      | G |
| 3 | BICF2G630702643        | 18234840 | A | 0   | 0      | C |
| 3 | BICF2G630702649        | 18241874 | A | 0   | 0      | G |
| 3 | BICF2G630702662        | 18257541 | C | 0   | 0      | A |
| 3 | BICF2S232346           | 18272310 | A | 0   | 0      | C |
| 3 | BICF2S23761366         | 18283572 | A | 0   | 0      | G |
| 3 | BICF2G630702677        | 18285390 | G | 0   | 0      | C |
| 3 | BICF2G630702679        | 18299368 | 0 | 0   | 0      | A |
| 3 | BICF2G630702683        | 18314344 | G | 0   | 0      | A |
| 3 | BICF2G630702685        | 18323618 | 0 | 0   | 0      | A |
| 3 | BICF2P1189187          | 18337862 | 0 | 0   | 0      | G |
| 3 | BICF2G630702689        | 18347913 | 0 | 0   | 0      | G |
| 3 | BICF2G630702700        | 18374016 | C | 0   | 0      | A |
| 3 | BICF2G630702703        | 18376467 | 0 | 0   | 0      | A |
| 3 | BICF2P1202236          | 18377270 | 0 | 0   | 0      | A |
| 3 | BICF2G630702709        | 18390288 | A | 0   | 0      | G |
| 3 | BICF2G630702716        | 18410324 | G | 0   | 0      | A |
| 3 | BICF2G630702723        | 18422733 | 0 | 0   | 0      | G |
| 3 | BICF2G630702725        | 18424972 | 0 | 0   | 0      | G |
| 3 | BICF2G630702729        | 18437521 | 0 | 0   | 0      | A |
| 3 | BICF2P958229           | 18446407 | A | 0   | 0      | G |
| 3 | BICF2P1108766          | 18465601 | 0 | 0   | 0      | A |
| 3 | BICF2G630702733        | 18475314 | G | 0   | 0      | A |
| 3 | BICF2P663455           | 18491402 | C | 0   | 0      | A |
| 3 | BICF2G630702741        | 18500212 | A | 0   | 0      | C |
| 3 | TIGRP2P38475_rs9037161 | 18512021 | G | 0   | 0      | C |
| 3 | BICF2P964513           | 18531517 | A | 0   | 0      | G |
| 3 | BICF2S2415971          | 18544107 | 0 | 0   | 0      | A |
| 3 | BICF2P1088595          | 18552274 | 0 | 0   | 0      | G |
| 3 | BICF2G630702755        | 18571735 | A | 0   | 0      | G |
| 3 | TIGRP2P38479_rs8501840 | 18575035 | A | 0   | 0      | G |
| 3 | BICF2P708685           | 18587977 | A | 0.5 | 0.2143 | G |
| 3 | BICF2P538525           | 18597140 | A | 0   | 0      | G |
| 3 | BICF2G630702757        | 18608252 | A | 0   | 0      | G |
| 3 | BICF2G630702764        | 18620631 | A | 0.5 | 0.2143 | G |

|   |                        |          |   |     |        |   |
|---|------------------------|----------|---|-----|--------|---|
| 3 | BICF2G630702769        | 18634070 | C | 0.5 | 0.2857 | A |
| 3 | BICF2G630702772        | 18653701 | C | 0.5 | 0.2143 | G |
| 3 | BICF2G630702777        | 18674782 | A | 0   | 0      | G |
| 3 | BICF2G630702779        | 18676158 | 0 | 0   | 0      | A |
| 3 | BICF2G630702783        | 18688997 | A | 0.5 | 0.1667 | C |
| 3 | BICF2G630702793        | 18700802 | A | 0.5 | 0.2143 | G |
| 3 | BICF2P508653           | 18711568 | A | 1   | 0.5    | G |
| 3 | BICF2G630702804        | 18733170 | A | 0.5 | 0.25   | C |
| 3 | TIGRP2P38501_rs9194254 | 18734967 | A | 0   | 0.5    | G |
| 3 | BICF2S23216307         | 18755070 | G | 0.5 | 0.2857 | A |
| 3 | BICF2G630702826        | 18767090 | A | 0.5 | 0.2857 | G |
| 3 | BICF2G630702827        | 18767185 | A | 0.5 | 0.2143 | T |
| 3 | BICF2P544779           | 18772675 | C | 0   | 0.5    | G |
| 3 | BICF2G630702838        | 18793308 | A | 0.5 | 0.2143 | G |
| 3 | BICF2G630702845        | 18803992 | A | 0   | 0      | G |
| 3 | TIGRP2P38508_rs9198208 | 18817367 | A | 0.5 | 0.2857 | G |
| 3 | BICF2G630702869        | 18848381 | G | 0.5 | 0.2857 | A |
| 3 | BICF2P1198038          | 18855030 | A | 0.5 | 0.7857 | T |
| 3 | BICF2G630702882        | 18860517 | A | 0.5 | 0.7857 | G |
| 3 | BICF2P232735           | 18875454 | C | 0   | 0      | A |
| 3 | BICF2P323649           | 18887708 | G | 0.5 | 0.2143 | A |
| 3 | TIGRP2P38522_rs8652558 | 18897187 | 0 | 0   | 0      | G |
| 3 | BICF2S23430670         | 18909666 | A | 1   | 1      | C |
| 3 | BICF2S2298506          | 18928811 | A | 0   | 0      | G |
| 3 | BICF2G630702902        | 18939550 | A | 1   | 1      | G |
| 3 | BICF2G630702903        | 18943264 | G | 1   | 1      | A |
| 3 | BICF2G630702914        | 18961026 | A | 0.5 | 0.2143 | C |
| 3 | BICF2G630702939        | 18989966 | 0 | 0   | 0      | A |
| 3 | BICF2S22947400         | 19001033 | G | 0   | 0      | A |
| 3 | BICF2P1331535          | 19031079 | 0 | 0   | 0      | G |
| 3 | BICF2S22926697         | 19035805 | A | 0   | 0      | G |
| 3 | BICF2P120117           | 19050898 | A | 0   | 0      | G |
| 3 | BICF2S2316728          | 19060344 | 0 | 0   | 0      | G |
| 3 | BICF2G630702944        | 19070601 | G | 0   | 0      | A |
| 3 | BICF2P732779           | 19079044 | G | 0.5 | 0.7143 | A |
| 3 | BICF2G630702970        | 19093318 | A | 0   | 0      | G |
| 3 | BICF2G630702985        | 19109056 | G | 0   | 0      | A |
| 3 | BICF2G630702988        | 19114662 | A | 0   | 0      | G |
| 3 | BICF2P1365344          | 19130129 | A | 0   | 0      | G |
| 3 | BICF2S23138900         | 19146081 | A | 0   | 0      | C |
| 3 | BICF2P603794           | 19147996 | G | 0   | 0      | A |
| 3 | TIGRP2P38558_rs9053658 | 19162081 | 0 | 0   | 0      | A |
| 3 | TIGRP2P38560_rs9237046 | 19171730 | A | 0   | 0      | G |
| 3 | BICF2G630703005        | 19184563 | 0 | 0   | 0      | A |
| 3 | BICF2G630703011        | 19200927 | 0 | 0   | 0      | G |
| 3 | BICF2G630703020        | 19206533 | A | 0   | 0      | G |
| 3 | BICF2G630703030        | 19216517 | G | 0   | 0      | A |

|   |                        |          |   |     |        |   |
|---|------------------------|----------|---|-----|--------|---|
| 3 | BICF2G630703056        | 19237173 | 0 | 0   | 0      | G |
| 3 | BICF2G630703061        | 19239561 | 0 | 0   | 0      | A |
| 3 | BICF2G630703095        | 19256245 | 0 | 0   | 0      | C |
| 3 | BICF2G630703124        | 19276605 | 0 | 0   | 0      | A |
| 3 | BICF2G630703137        | 19285614 | 0 | 0   | 0      | G |
| 3 | BICF2G630703151        | 19303013 | C | 0.5 | 0.25   | A |
| 3 | BICF2P841378           | 19312341 | G | 1   | 0.5    | A |
| 3 | BICF2G630703160        | 19317603 | A | 0   | 0.5    | C |
| 3 | BICF2G630703163        | 19320397 | G | 0   | 0      | A |
| 3 | BICF2P624502           | 19338973 | C | 0.5 | 0.2857 | A |
| 3 | BICF2S23057764         | 19345993 | A | 0.5 | 0.7143 | G |
| 3 | BICF2P131093           | 19354772 | A | 0   | 0      | G |
| 3 | BICF2G630703165        | 19376268 | A | 0   | 0      | G |
| 3 | TIGRP2P38581_rs9060853 | 19378023 | G | 0.5 | 0.7143 | A |
| 3 | BICF2G630703186        | 19398025 | A | 0.5 | 0.2143 | G |
| 3 | BICF2G630703200        | 19405029 | G | 0   | 0      | A |
| 3 | BICF2G630703208        | 19418101 | A | 0.5 | 0.2143 | G |
| 3 | BICF2G630703215        | 19426646 | G | 0   | 0      | A |
| 3 | BICF2G630703225        | 19437944 | A | 0   | 0      | G |
| 3 | BICF2G630703238        | 19447081 | A | 1   | 1      | G |
| 3 | BICF2G630703240        | 19461083 | A | 0   | 0      | C |
| 3 | BICF2G630703242        | 19470024 | G | 0.5 | 0.2857 | A |
| 3 | BICF2G630703245        | 19482991 | G | 0   | 0      | A |
| 3 | BICF2G630703259        | 19496345 | A | 0.5 | 0.2143 | G |
| 3 | BICF2G630703266        | 19506869 | A | 0   | 0      | G |
| 3 | BICF2P795472           | 19518958 | G | 0   | 0      | A |
| 3 | BICF2P866954           | 19538428 | G | 0   | 0      | A |
| 3 | BICF2P777955           | 19542668 | G | 0   | 0      | A |
| 3 | BICF2G630703308        | 19559403 | A | 0.5 | 0.2857 | G |
| 3 | BICF2P1431252          | 19568917 | A | 0   | 0      | G |
| 3 | BICF2G630703343        | 19585617 | G | 0.5 | 0.2857 | A |
| 3 | BICF2P152793           | 19586308 | A | 0   | 0      | C |
| 3 | BICF2G630703354        | 19596475 | A | 0   | 0      | G |
| 3 | BICF2G630703376        | 19611889 | G | 0   | 0      | A |
| 3 | BICF2G630703383        | 19629578 | C | 0.5 | 0.2857 | A |
| 3 | BICF2P731705           | 19635495 | A | 0.5 | 0.2857 | G |
| 3 | BICF2G630703403        | 19646292 | G | 0.5 | 0.2857 | A |
| 3 | BICF2G630703436        | 19679898 | G | 0   | 0      | A |
| 3 | BICF2P676761           | 19689532 | G | 0.5 | 0.2857 | A |
| 3 | BICF2G630703452        | 19722496 | A | 1   | 0.5    | G |
| 3 | G219f30S242            | 19743758 | A | 0   | 0      | G |
| 3 | BICF2G630703453        | 19763578 | A | 0.5 | 0.7857 | G |
| 3 | BICF2G630703457        | 19769884 | C | NA  | 1      | A |
| 3 | BICF2G630703480        | 19782527 | A | 0.5 | 0.7857 | G |
| 3 | BICF2G630703499        | 19802024 | C | 0.5 | 0.2857 | A |
| 3 | BICF2G630703507        | 19809004 | A | 1   | 0.5    | G |
| 3 | BICF2G630703528        | 19815216 | A | 0.5 | 0.2143 | G |

|   |                        |          |   |     |        |   |
|---|------------------------|----------|---|-----|--------|---|
| 3 | BICF2G630703540        | 19833615 | G | 0.5 | 0.2857 | A |
| 3 | BICF2P819277           | 19848981 | A | 0   | 0      | G |
| 3 | BICF2P425048           | 19849663 | A | 0   | 0      | G |
| 3 | TIGRP2P38645_rs8733900 | 19870660 | A | 0.5 | 0.2857 | G |
| 3 | TIGRP2P38654_rs9030381 | 19879973 | A | 0.5 | 0.2143 | G |
| 3 | BICF2P563532           | 19884385 | G | 0.5 | 0.2857 | A |
| 3 | BICF2P912159           | 19895823 | A | 0   | 0      | C |
| 3 | TIGRP2P38668_rs9181658 | 19914811 | G | 0   | 0      | A |
| 3 | BICF2S23432488         | 19919299 | G | 0   | 0.5    | A |
| 3 | BICF2S23024424         | 19933754 | G | 1   | 0.5    | A |
| 3 | BICF2S23228062         | 19942977 | A | 0   | 0      | G |
| 3 | BICF2G630703558        | 19953151 | A | 0   | 0      | G |
| 3 | TIGRP2P38679_rs8571535 | 19971122 | 0 | 0   | 0      | C |
| 3 | BICF2P896362           | 19976901 | A | 0   | 0      | G |
| 3 | BICF2G630703591        | 19995818 | 0 | 0   | 0      | G |
| 3 | BICF2P1021592          | 20000524 | A | 0   | 0      | G |
| 3 | BICF2G630703598        | 20017067 | A | 0   | 0      | G |
| 3 | BICF2G630703620        | 20026519 | G | 0.5 | 0.2143 | A |
| 3 | BICF2P1413618          | 20033803 | A | 0.5 | 0.2857 | G |
| 3 | BICF2G630703633        | 20050549 | A | 0   | 0      | G |
| 3 | BICF2G630703638        | 20056675 | G | 0   | 0      | A |
| 3 | BICF2G630703641        | 20069096 | G | 0   | 0.5    | A |
| 3 | BICF2G630703657        | 20089275 | C | 0.5 | 0.25   | A |
| 3 | TIGRP2P38714_rs8963275 | 20097715 | A | 0.5 | 0.2857 | G |
| 3 | BICF2P728993           | 20112571 | A | 0.5 | 0.2857 | G |
| 3 | BICF2P728990           | 20113630 | G | 0.5 | 0.2143 | A |
| 3 | BICF2P403384           | 20132409 | 0 | 0   | 0      | A |
| 3 | BICF2P1385868          | 20137858 | G | 0   | 0      | A |
| 3 | BICF2G630703694        | 20149828 | G | 0.5 | 0.2143 | A |
| 3 | BICF2G630703710        | 20160185 | G | 0   | 0      | A |
| 3 | BICF2P177556           | 20174664 | A | 0.5 | 0.7857 | C |
| 3 | BICF2P535618           | 20185982 | A | 0   | 0      | C |
| 3 | BICF2P685831           | 20197492 | A | 0.5 | 0.7857 | C |
| 3 | BICF2P68391            | 20209435 | A | 0.5 | 0.7857 | G |
| 3 | BICF2P916407           | 20220143 | 0 | 0   | 0      | A |
| 3 | BICF2P769583           | 20228640 | 0 | 0   | 0      | A |
| 3 | BICF2P252925           | 20247172 | G | 0   | 0      | A |
| 3 | BICF2P542982           | 20262267 | 0 | 0   | 0      | G |
| 3 | BICF2G630703735        | 20295114 | A | 0.5 | 0.2143 | T |
| 3 | BICF2G630703738        | 20297665 | G | 0.5 | 0.2143 | A |
| 3 | BICF2G630703741        | 20318499 | G | 0   | 0      | A |
| 3 | BICF2G630703743        | 20322930 | C | 0   | 0      | A |
| 3 | BICF2G630703754        | 20335945 | G | 0.5 | 0.2143 | A |
| 3 | BICF2G630703760        | 20344707 | G | 0   | 0      | A |
| 3 | BICF2G630703764        | 20356280 | A | 0.5 | 0.2143 | G |
| 3 | BICF2G630703765        | 20359373 | G | 0.5 | 0.2143 | A |
| 3 | TIGRP2P38769_rs8773291 | 20375206 | G | 0   | 0      | A |

|   |                        |          |   |     |        |   |
|---|------------------------|----------|---|-----|--------|---|
| 3 | BICF2G630703792        | 20385990 | C | 0   | 0      | A |
| 3 | BICF2G630703795        | 20400908 | A | 0   | 0      | G |
| 3 | BICF2G630703800        | 20406716 | A | 0   | 0      | G |
| 3 | BICF2G630703813        | 20423886 | A | 0   | 0      | G |
| 3 | BICF2G630703815        | 20431385 | G | 0.5 | 0.2143 | A |
| 3 | BICF2G630703820        | 20438830 | A | 0.5 | 0.2143 | G |
| 3 | BICF2G630703826        | 20451249 | G | 0.5 | 0.2143 | A |
| 3 | BICF2G630703828        | 20464761 | G | 0.5 | 0.2143 | A |
| 3 | BICF2G630703833        | 20471442 | G | 0.5 | 0.2143 | A |
| 3 | BICF2P1156514          | 20487166 | 0 | 0   | 0      | G |
| 3 | BICF2P243389           | 20501382 | 0 | 0   | 0      | A |
| 3 | BICF2G630703836        | 20505717 | C | 0.5 | 0.2143 | A |
| 3 | BICF2G630703840        | 20525151 | A | 0   | 0      | G |
| 3 | BICF2G630703842        | 20529992 | A | 0.5 | 0.2143 | G |
| 3 | BICF2G630703872        | 20556036 | 0 | 0   | 0      | C |
| 3 | BICF2P392704           | 20571421 | A | 0.5 | 0.2143 | C |
| 3 | BICF2G630703881        | 20581297 | A | 0.5 | 0.2143 | G |
| 3 | BICF2G630703888        | 20590954 | A | 0.5 | 0.2143 | G |
| 3 | BICF2G630703896        | 20607438 | 0 | 0   | 0      | C |
| 3 | BICF2G630703897        | 20610522 | 0 | 0   | 0      | G |
| 3 | BICF2P696038           | 20623665 | A | 0.5 | 0.7143 | G |
| 3 | BICF2P820316           | 20635937 | G | 0.5 | 0.7143 | A |
| 3 | BICF2P107454           | 20646227 | G | 0.5 | 0.7143 | A |
| 3 | BICF2P1425768          | 20655511 | A | 0   | 0.5    | G |
| 3 | BICF2G630703914        | 20665913 | 0 | 0   | 0      | A |
| 3 | BICF2G630703916        | 20680798 | A | 0   | 0.5    | G |
| 3 | BICF2P1140878          | 20698806 | G | 0.5 | 0.7143 | A |
| 3 | BICF2G630703924        | 20715001 | C | 0   | 0.5    | A |
| 3 | BICF2P1377213          | 20749552 | A | 0   | 0      | G |
| 3 | BICF2S24413706         | 20760778 | A | 0.5 | 0.2143 | G |
| 3 | BICF2G630703937        | 20782197 | G | 0   | 0      | A |
| 3 | BICF2S23634771         | 20792649 | 0 | 0   | 0      | G |
| 3 | BICF2P862831           | 20813300 | 0 | 0   | 0      | A |
| 3 | BICF2P1024676          | 20822329 | G | 0.5 | 0.7143 | A |
| 3 | BICF2P1171512          | 20828633 | 0 | 0   | 0      | C |
| 3 | BICF2G630703940        | 20843210 | A | 0.5 | 0.7143 | G |
| 3 | BICF2G630703951        | 20851767 | A | 0.5 | 0.7143 | C |
| 3 | BICF2P435096           | 20866372 | A | 0   | 0      | G |
| 3 | BICF2S23155225         | 20882541 | A | 0.5 | 0.7143 | G |
| 3 | BICF2P100686           | 20885173 | G | 0   | 0.5    | A |
| 3 | BICF2P785425           | 20901638 | A | 1   | 0.5    | G |
| 3 | BICF2P823068           | 20916763 | G | 1   | 0.5    | A |
| 3 | TIGRP2P38827_rs8662461 | 20924483 | G | 0   | 0.5    | A |
| 3 | BICF2G630703970        | 20933738 | 0 | 0   | 0      | G |
| 3 | BICF2S23661029         | 20948299 | A | 0   | 0.5    | G |
| 3 | BICF2S2373643          | 20959505 | A | 0.5 | 0.7143 | G |
| 3 | BICF2P674253           | 20966022 | 0 | 0   | 0      | A |

|   |                        |          |   |     |        |   |
|---|------------------------|----------|---|-----|--------|---|
| 3 | BICF2P1311415          | 20974420 | G | 0.5 | 0.2143 | A |
| 3 | BICF2P926553           | 20985086 | G | 1   | 0.5    | A |
| 3 | BICF2G630703974        | 20992168 | A | 0   | 0      | C |
| 3 | BICF2G630703986        | 21007121 | G | 0   | 0      | A |
| 3 | BICF2G630703990        | 21015972 | G | 0   | 0      | A |
| 3 | BICF2G630703997        | 21025756 | G | 0   | 0      | A |
| 3 | BICF2G630704003        | 21034016 | C | 0.5 | 0.2143 | A |
| 3 | BICF2G630704005        | 21046428 | 0 | 0   | 0      | A |
| 3 | BICF2G630704022        | 21072440 | C | 0   | 0      | A |
| 3 | BICF2G630704025        | 21083034 | G | 0.5 | 0.2143 | A |
| 3 | BICF2G630704031        | 21093302 | G | 0   | 0      | A |
| 3 | BICF2G630704040        | 21105681 | G | 0   | 0      | A |
| 3 | BICF2G630704051        | 21123015 | C | 0.5 | 0.2143 | A |
| 3 | BICF2P445420           | 21134775 | G | 0   | 0.5    | A |
| 3 | BICF2G630704069        | 21140138 | G | 0.5 | 0.7143 | A |
| 3 | BICF2G630704070        | 21141328 | G | 0.5 | 0.2143 | A |
| 3 | BICF2G630704084        | 21156688 | G | 0.5 | 0.2143 | A |
| 3 | BICF2G630704088        | 21160115 | C | 0.5 | 0.7143 | A |
| 3 | BICF2S23161534         | 21180618 | A | 0.5 | 0.2143 | T |
| 3 | BICF2G630704092        | 21184276 | C | 0.5 | 0.2143 | A |
| 3 | BICF2G630704093        | 21197733 | G | 0.5 | 0.2143 | A |
| 3 | BICF2G630704099        | 21209308 | G | 0.5 | 0.2143 | A |
| 3 | BICF2G630704115        | 21220106 | G | 0.5 | 0.2143 | A |
| 3 | BICF2G630704126        | 21230171 | G | 0.5 | 0.2143 | A |
| 3 | BICF2G630704131        | 21269377 | G | 0   | 0.5    | A |
| 3 | BICF2G630704143        | 21275535 | 0 | 0   | 0      | T |
| 3 | BICF2P1104599          | 21281629 | G | 0.5 | 0.7143 | A |
| 3 | TIGRP2P38864_rs8590289 | 21296387 | G | 0   | 0      | A |
| 3 | TIGRP2P38865_rs8711012 | 21298503 | 0 | 0   | 0      | G |
| 3 | BICF2P594612           | 21317307 | A | 0   | 0      | G |
| 3 | TIGRP2P38874_rs8636589 | 21325130 | A | 0   | 0      | T |
| 3 | BICF2P1386054          | 21334310 | 0 | 0   | 0      | G |
| 3 | TIGRP2P38882_rs9075166 | 21344514 | 0 | 0   | 0      | A |
| 3 | BICF2S2337717          | 21386068 | 0 | 0   | 0      | A |
| 3 | BICF2P1076691          | 21423953 | 0 | 0   | 0      | A |
| 3 | BICF2P1003709          | 21425680 | 0 | 0   | 0      | A |
| 3 | BICF2P1027258          | 21437655 | A | 0   | 0      | T |
| 3 | BICF2P614287           | 21475341 | 0 | 0   | 0      | T |
| 3 | BICF2S23218931         | 21520061 | 0 | 0   | 0      | A |
| 3 | BICF2P118782           | 21532796 | 0 | 0   | 0      | A |
| 3 | BICF2P1087899          | 21545394 | 0 | 0   | 0      | A |
| 3 | BICF2P812543           | 21554735 | 0 | 0   | 0      | C |
| 3 | BICF2P874126           | 21577483 | 0 | 0   | 0      | A |
| 3 | BICF2P1067466          | 21595904 | 0 | 0   | 0      | A |
| 3 | BICF2P1438162          | 21620707 | 0 | 0   | 0      | G |
| 3 | BICF2S23547902         | 21650840 | 0 | 0   | 0      | G |
| 3 | BICF2P1307535          | 21663645 | G | 0.5 | 0.2857 | A |

|   |                        |          |   |     |        |   |
|---|------------------------|----------|---|-----|--------|---|
| 3 | TIGRP2P38902_rs8823003 | 21751044 | 0 | 0   | 0      | A |
| 3 | BICF2P1006434          | 21785268 | 0 | 0   | 0      | A |
| 3 | G223f34S128            | 21805856 | 0 | 0   | 0      | C |
| 3 | BICF2P1472450          | 21830184 | 0 | 0   | 0      | A |
| 3 | BICF2P318427           | 21839851 | 0 | 0   | 0      | G |
| 3 | BICF2P797664           | 21882272 | G | 0   | 0.5    | A |
| 3 | BICF2P1213922          | 21886247 | 0 | 0   | 0      | A |
| 3 | BICF2P147784           | 21952562 | 0 | 0   | 0      | A |
| 3 | BICF2P117121           | 21956046 | 0 | 0   | 0      | A |
| 3 | TIGRP2P38908_rs9091489 | 21982181 | 0 | 0   | 0      | A |
| 3 | BICF2P571131           | 21997907 | A | 0   | 0.5    | G |
| 3 | BICF2P843931           | 22004586 | C | 0   | 0.5    | A |
| 3 | BICF2P1172002          | 22020263 | A | 0   | 0      | G |
| 3 | BICF2P1172003          | 22020354 | G | 0   | 0      | A |
| 3 | BICF2P1506703          | 22022910 | 0 | 0   | 0      | C |
| 3 | BICF2S23753620         | 22035624 | A | 0.5 | 0.7143 | G |
| 3 | BICF2P695830           | 22047890 | C | 0.5 | 0.7143 | A |
| 3 | TIGRP2P38910_rs8697050 | 22059384 | 0 | 0   | 0      | A |
| 3 | BICF2P1398376          | 22078534 | G | 0   | 0.5    | A |
| 3 | BICF2P1470119          | 22089159 | A | 0   | 0      | G |
| 3 | TIGRP2P38921_rs8642210 | 22100011 | A | 0   | 0.5    | G |
| 3 | TIGRP2P38932_rs8676347 | 22111274 | A | 0   | 0.5    | G |
| 3 | BICF2S23641595         | 22115038 | A | 0   | 0.5    | G |
| 3 | TIGRP2P38936_rs8732510 | 22127553 | C | 0.5 | 0.7143 | A |
| 3 | TIGRP2P38939_rs8780953 | 22138508 | A | 0   | 0      | G |
| 3 | BICF2P136332           | 22154425 | G | 0   | 0      | A |
| 3 | BICF2S2292282          | 22169108 | A | 0   | 0      | C |
| 3 | BICF2P856574           | 22203131 | 0 | 0   | 0      | A |
| 3 | BICF2S23646139         | 22215865 | G | 0   | 0      | A |
| 3 | TIGRP2P38948_rs8717770 | 22227209 | A | 0   | 0      | G |
| 3 | BICF2S23353083         | 22233338 | C | 0   | 0      | A |
| 3 | BICF2P941736           | 22252200 | A | 0   | 0      | G |
| 3 | BICF2P526597           | 22266555 | G | 0   | 0      | A |
| 3 | BICF2S23318678         | 22278940 | C | 0.5 | 0.2143 | A |
| 3 | BICF2P1189059          | 22287397 | 0 | 0   | 0      | G |
| 3 | BICF2P1271138          | 22304781 | A | 0.5 | 0.2143 | G |
| 3 | BICF2P875275           | 22310878 | A | 0.5 | 0.2143 | G |
| 3 | BICF2S23634710         | 22324424 | G | 0.5 | 0.2143 | A |
| 3 | BICF2P1080217          | 22338139 | G | 0.5 | 0.2143 | A |
| 3 | BICF2P842711           | 22350904 | 0 | 0   | 0      | C |
| 3 | BICF2P589379           | 22399723 | 0 | 0   | 0      | A |
| 3 | BICF2S23351315         | 22409332 | G | 0.5 | 0.2143 | A |
| 3 | BICF2P991877           | 22415198 | 0 | 0   | 0      | C |
| 3 | BICF2P144179           | 22452113 | 0 | 0   | 0      | G |
| 3 | BICF2S2311484          | 22468897 | G | 0.5 | 0.7143 | A |
| 3 | BICF2P1157776          | 22475279 | G | 0.5 | 0.7143 | A |
| 3 | BICF2P353546           | 22482943 | A | 0.5 | 0.1667 | G |

|   |                        |          |   |     |        |   |
|---|------------------------|----------|---|-----|--------|---|
| 3 | BICF2P885942           | 22497674 | G | 0.5 | 0.2143 | A |
| 3 | BICF2S22916431         | 22509566 | G | 0.5 | 0.7857 | A |
| 3 | BICF2S23244437         | 22521287 | G | 0.5 | 0.7857 | A |
| 3 | BICF2P453997           | 22534410 | 0 | 0   | 0      | C |
| 3 | BICF2P1283972          | 22548586 | G | 0   | 0.5    | A |
| 3 | BICF2S23117369         | 22556229 | A | 0   | 0      | G |
| 3 | BICF2P1312271          | 22570040 | 0 | 0   | 0      | G |
| 3 | BICF2S23251848         | 22576872 | G | 0   | 0      | A |
| 3 | BICF2P388477           | 22595205 | A | 0   | 0      | G |
| 3 | BICF2P268805           | 22601694 | 0 | 0   | 0      | A |
| 3 | TIGRP2P38992_rs9084574 | 22613040 | 0 | 0   | 0      | A |
| 3 | TIGRP2P38993_rs8657891 | 22629829 | 0 | 0   | 0      | C |
| 3 | BICF2S23539164         | 22634605 | A | 1   | 0.5    | G |
| 3 | BICF2P368655           | 22653761 | A | 1   | 0.5    | G |
| 3 | BICF2P1110565          | 22665388 | G | 0   | 0      | A |
| 3 | BICF2P493449           | 22667324 | G | 1   | 0.5    | A |
| 3 | BICF2P446530           | 22687977 | G | 0   | 0      | A |
| 3 | BICF2P739271           | 22691584 | A | 0   | 0      | G |
| 3 | BICF2P492922           | 22712913 | A | 0   | 0      | G |
| 3 | BICF2P828459           | 22728672 | C | 0   | 0.5    | A |
| 3 | BICF2P119003           | 22736566 | 0 | 0   | 0      | A |
| 3 | BICF2S2334492          | 22752574 | A | 0   | 0.5    | G |
| 3 | BICF2P458690           | 22769546 | C | 0   | 0.5    | A |
| 3 | BICF2S23721624         | 22779312 | G | 0   | 0      | A |
| 3 | BICF2P421448           | 22799244 | A | 0   | 0.5    | C |
| 3 | BICF2P1163892          | 22809511 | G | 0   | 0.5    | A |
| 3 | BICF2P1098056          | 22819966 | 0 | 0   | 0      | C |
| 3 | BICF2S22946718         | 22833598 | G | 0   | 0.5    | A |
| 3 | TIGRP2P38997_rs8659554 | 22839513 | G | 0.5 | 0.2143 | A |
| 3 | BICF2P331235           | 22860679 | A | 0   | 0      | G |
| 3 | BICF2P264333           | 22867119 | A | 0   | 0      | G |
| 3 | TIGRP2P39005_rs8875213 | 22874783 | A | 0.5 | 0.25   | G |
| 3 | BICF2P1134009          | 22895752 | A | 0.5 | 0.7857 | G |
| 3 | TIGRP2P39017_rs9159504 | 22902597 | A | 0.5 | 0.7857 | G |
| 3 | TIGRP2P39020_rs8933801 | 22912231 | G | 0.5 | 0.2143 | A |
| 3 | TIGRP2P39022_rs8924216 | 22920062 | 0 | 0   | 0      | C |
| 3 | TIGRP2P39029_rs8914036 | 22932700 | A | 0   | 0      | C |
| 3 | BICF2P961290           | 22944739 | C | 0   | 0      | A |
| 3 | BICF2P508378           | 22958540 | A | 0.5 | 0.2143 | G |
| 3 | BICF2P1057376          | 22964006 | A | 0   | 0      | G |
| 3 | BICF2P1118886          | 22975275 | C | 0.5 | 0.7857 | A |
| 3 | BICF2S23912901         | 22987520 | C | 0   | 0      | A |
| 3 | BICF2P349656           | 22989086 | A | 0   | 0      | G |
| 3 | BICF2P591392           | 23000723 | A | 0.5 | 0.7857 | G |
| 3 | TIGRP2P39064_rs8862137 | 23013823 | G | 0   | 0      | A |
| 3 | BICF2P928359           | 23028486 | 0 | 0   | 0      | G |
| 3 | BICF2P875580           | 23039291 | A | 0.5 | 0.7857 | C |



|   |                        |          |   |     |        |   |
|---|------------------------|----------|---|-----|--------|---|
| 3 | BICF2S23136277         | 23046664 | A | 0   | 0      | C |
| 3 | BICF2P580740           | 23075598 | C | 0   | 0      | A |
| 3 | BICF2P1243785          | 23089527 | A | 0   | 0      | G |
| 3 | BICF2P222513           | 23095289 | G | 0   | 0      | A |
| 3 | BICF2P865031           | 23104667 | A | 0   | 0      | G |
| 3 | BICF2P521685           | 23118440 | A | 0   | 0      | G |
| 3 | BICF2P468650           | 23136488 | G | 0   | 0      | A |
| 3 | BICF2P351775           | 23145729 | 0 | 0   | 0      | G |
| 3 | BICF2P351776           | 23146400 | A | 0.5 | 0.2857 | G |
| 3 | BICF2S2398047          | 23158204 | G | 0   | 0      | A |
| 3 | BICF2P246825           | 23164254 | T | 1   | 0.5    | A |
| 3 | BICF2P1385718          | 23176116 | A | 0.5 | 0.1667 | C |
| 3 | BICF2P623268           | 23186337 | A | 0.5 | 0.2143 | G |
| 3 | TIGRP2P39115_rs8718367 | 23218241 | C | 0.5 | 0.2857 | A |
| 3 | BICF2P701091           | 23221275 | C | 0.5 | 0.2143 | A |
| 3 | BICF2P1126860          | 23230988 | A | 0.5 | 0.2143 | T |
| 3 | BICF2P1033453          | 23253145 | A | 0.5 | 0.2143 | C |
| 3 | BICF2P173125           | 23268139 | G | 0.5 | 0.2143 | A |
| 3 | BICF2P270580           | 23280595 | G | 0.5 | 0.2143 | A |
| 3 | BICF2P169169           | 23297707 | C | 0.5 | 0.2143 | A |
| 3 | BICF2S23229652         | 23303439 | G | 0.5 | 0.2143 | A |
| 3 | TIGRP2P39125_rs9060488 | 23328391 | G | 0.5 | 0.2857 | A |
| 3 | BICF2S23146185         | 23332280 | A | 0.5 | 0.25   | C |
| 3 | BICF2S23146186         | 23332370 | A | 0.5 | 0.2857 | T |
| 3 | BICF2S23146626         | 23336179 | C | 0.5 | 0.2857 | A |
| 3 | BICF2P888889           | 23351158 | G | 0   | 0      | A |
| 3 | BICF2P856017           | 23358440 | 0 | 0   | 0      | A |
| 3 | BICF2P1030690          | 23368786 | G | 0.5 | 0.7857 | C |
| 3 | TIGRP2P39148_rs8905390 | 23379691 | 0 | 0   | 0      | G |
| 3 | BICF2P122888           | 23391906 | A | 0.5 | 0.2143 | G |
| 3 | BICF2P465473           | 23416078 | 0 | 0   | 0      | C |
| 3 | TIGRP2P39152_rs9235522 | 23435786 | A | 0   | 0      | G |
| 3 | BICF2S23162032         | 23447664 | C | 0   | 0      | G |
| 3 | BICF2S23162439         | 23450903 | C | 0   | 0      | A |
| 3 | BICF2P867663           | 23461780 | A | 0.5 | 0.7857 | G |
| 3 | BICF2P1035475          | 23476220 | G | 0.5 | 0.7857 | A |
| 3 | TIGRP2P39158_rs8540981 | 23483305 | A | 0.5 | 0.9    | C |
| 3 | BICF2S23221577         | 23501494 | G | 0.5 | 0.2143 | C |
| 3 | BICF2S23617513         | 23510970 | G | 0.5 | 0.2143 | A |
| 3 | TIGRP2P39169_rs8775070 | 23521461 | 0 | 0   | 0      | G |
| 3 | BICF2P1410994          | 23542679 | G | 0   | 0      | A |
| 3 | BICF2S23232383         | 23557152 | A | 0   | 0.5    | G |
| 3 | BICF2P200162           | 23564544 | A | 0   | 0      | G |
| 3 | BICF2P329448           | 23579446 | G | 0   | 0      | A |
| 3 | BICF2P1031182          | 23589110 | C | 0   | 0      | A |
| 3 | TIGRP2P39195_rs9227814 | 23610377 | A | 0   | 0      | G |
| 3 | BICF2P845619           | 23634880 | 0 | 0   | 0      | A |

|   |                        |          |   |     |        |   |
|---|------------------------|----------|---|-----|--------|---|
| 3 | BICF2P129403           | 23647980 | 0 | 0   | 0      | A |
| 3 | BICF2P123477           | 23665006 | G | 0.5 | 0.2143 | A |
| 3 | BICF2S2453627          | 23682958 | 0 | 0   | 0      | G |
| 3 | BICF2P886939           | 23694168 | A | 0.5 | 0.1667 | C |
| 3 | BICF2P307209           | 23703493 | C | 0.5 | 0.2143 | G |
| 3 | BICF2P1161338          | 23723692 | A | 0.5 | 0.1667 | G |
| 3 | TIGRP2P39240_rs9184695 | 23724971 | G | 0.5 | 0.2143 | C |
| 3 | BICF2P167222           | 23754738 | C | 0   | 0      | A |
| 3 | BICF2P1196530          | 23774455 | 0 | 0   | 0      | G |
| 3 | G226f18S241            | 23801585 | 0 | 0   | 0      | A |
| 3 | BICF2P663267           | 23832907 | A | 1   | 0.5    | G |
| 3 | G227f19S258            | 23855145 | 0 | 0   | 0      | C |
| 3 | TIGRP2P39268_rs8817594 | 23878651 | C | 0   | 0      | A |
| 3 | BICF2P419928           | 23902242 | 0 | 0   | 0      | A |
| 3 | BICF2S23050028         | 23914226 | A | 0   | 0      | C |
| 3 | BICF2S23354206         | 23934516 | A | 0   | 0      | G |
| 3 | BICF2S2417245          | 23949758 | A | 0   | 0.5    | G |
| 3 | TIGRP2P39281_rs9092970 | 23962165 | C | 1   | 1      | A |
| 3 | BICF2S23035138         | 24006708 | A | 0.5 | 0.2857 | G |
| 3 | G228f27S159            | 24030289 | 0 | 0   | 0      | G |
| 3 | BICF2S23027842         | 24055553 | T | 0.5 | 0.2857 | A |
| 3 | BICF2S23441320         | 24063446 | G | 0   | 0      | A |
| 3 | BICF2S23619319         | 24070901 | 0 | 0   | 0      | G |
| 3 | BICF2P360795           | 24098583 | A | 0   | 0      | G |
| 3 | BICF2P712561           | 24112831 | C | 0   | 0      | A |
| 3 | BICF2S23513533         | 24120137 | A | 1   | 1      | G |
| 3 | BICF2S23437075         | 24134024 | A | 0   | 0      | G |
| 3 | BICF2P1146146          | 24148101 | G | 0.5 | 0.25   | A |
| 3 | BICF2S22938778         | 24150654 | A | 0   | 0      | C |
| 3 | BICF2S23529877         | 24163528 | G | 0.5 | 0.2143 | A |
| 3 | TIGRP2P39300_rs8860106 | 24175230 | A | 0   | 0      | G |
| 3 | TIGRP2P39302_rs8633338 | 24185742 | G | 1   | 1      | A |
| 3 | BICF2P409071           | 24202023 | G | 0.5 | 0.8    | A |
| 3 | TIGRP2P39318_rs8715142 | 24213375 | A | 0.5 | 0.2143 | C |
| 3 | TIGRP2P39320_rs8747089 | 24230305 | 0 | 0   | 0      | G |
| 3 | BICF2S23634134         | 24251866 | A | 0   | 0      | G |
| 3 | BICF2S23631893         | 24256563 | G | 0.5 | 0.2143 | A |
| 3 | TIGRP2P39336_rs9111755 | 24275325 | G | 0.5 | 0.7143 | A |
| 3 | TIGRP2P39343_rs9086022 | 24287342 | A | 0   | 0      | G |
| 3 | BICF2S23650397         | 24302364 | 0 | 0   | 0      | G |
| 3 | BICF2P880355           | 24315938 | A | 0.5 | 0.7143 | G |
| 3 | BICF2S23439285         | 24332542 | A | 0.5 | 0.7143 | G |
| 3 | BICF2P1047463          | 24335637 | A | 0.5 | 0.7143 | G |
| 3 | BICF2P957161           | 24348731 | A | 0.5 | 0.2857 | G |
| 3 | BICF2S2444899          | 24359096 | A | 0.5 | 0.7143 | G |
| 3 | BICF2P643688           | 24361777 | A | 0.5 | 0.7143 | G |
| 3 | BICF2P1250319          | 24373394 | G | 0   | 0      | A |

|   |                        |          |   |     |        |   |
|---|------------------------|----------|---|-----|--------|---|
| 3 | BICF2P276691           | 24399421 | G | 0.5 | 0.7143 | C |
| 3 | BICF2P1017324          | 24419595 | A | 0.5 | 0.75   | G |
| 3 | BICF2P400723           | 24433978 | A | 0.5 | 0.7143 | C |
| 3 | BICF2P525257           | 24437877 | G | 0.5 | 0.7143 | C |
| 3 | TIGRP2P39383_rs8689514 | 24449994 | C | 0.5 | 0.7143 | A |
| 3 | BICF2S23515454         | 24466694 | A | 0.5 | 0.7143 | C |
| 3 | TIGRP2P39394_rs9029032 | 24478755 | A | 0.5 | 0.2857 | G |
| 3 | TIGRP2P39403_rs8797790 | 24486280 | G | 0.5 | 0.7143 | A |
| 3 | BICF2S24110294         | 24509461 | C | 0   | 0.5    | A |
| 3 | TIGRP2P39421_rs9214502 | 24525024 | 0 | 0   | 0      | G |
| 3 | BICF2P359531           | 24552875 | 0 | 0   | 0      | G |
| 3 | BICF2P1308230          | 24589115 | A | 0.5 | 0.2857 | G |
| 3 | TIGRP2P39480_rs8971143 | 24598864 | G | 0.5 | 0.2857 | A |
| 3 | BICF2P675091           | 24631026 | A | 0.5 | 0.2857 | G |
| 3 | BICF2S2329711          | 24653969 | G | 0   | 0.5    | A |
| 3 | BICF2S23414921         | 24662231 | A | 0   | 0.5    | G |
| 3 | TIGRP2P39492_rs8526946 | 24695270 | 0 | 0   | 0      | A |
| 3 | TIGRP2P39493_rs8596531 | 24702582 | A | 0   | 0.5    | G |
| 3 | BICF2S23621295         | 24717744 | G | 0   | 0.5    | A |
| 3 | BICF2S2318793          | 24728840 | A | 0   | 0.5    | G |
| 3 | BICF2S23132141         | 24748340 | G | 0   | 0.5    | A |
| 3 | BICF2P50041            | 24781908 | A | 0   | 0      | G |
| 3 | BICF2P655153           | 24816289 | G | 0   | 0.5    | C |
| 3 | BICF2P1369888          | 24847947 | A | 0   | 0.5    | G |
| 3 | BICF2S2359279          | 24852592 | G | 0   | 0.5    | A |
| 3 | BICF2P220833           | 24868090 | 0 | 0   | 0      | A |
| 3 | BICF2S23129534         | 24919255 | G | 0   | 0.5    | C |
| 3 | BICF2P258371           | 24962616 | 0 | 0   | 0      | A |
| 3 | BICF2P263159           | 24975784 | 0 | 0   | 0      | C |
| 3 | BICF2S23640689         | 25012387 | 0 | 0   | 0      | G |
| 3 | BICF2S23640225         | 25016620 | 0 | 0   | 0      | A |
| 3 | BICF2P422973           | 25105023 | 0 | 0   | 0      | A |
| 3 | G229f51S198            | 25134153 | G | 0   | 0      | A |
| 3 | BICF2P968932           | 25161507 | 0 | 0   | 0      | C |
| 3 | G230f36S128            | 25186657 | G | 0   | 0      | A |
| 3 | BICF2S23256653         | 25205032 | 0 | 0   | 0      | G |
| 3 | BICF2S23256268         | 25209199 | 0 | 0   | 0      | C |
| 3 | BICF2P500949           | 25241271 | 0 | 0   | 0      | A |
| 3 | BICF2P360758           | 25263247 | G | 0   | 0      | A |
| 3 | BICF2S23636912         | 25288291 | A | 0   | 0      | G |
| 3 | BICF2P701856           | 25290132 | C | 0   | 0.5    | G |
| 3 | G231f40S141            | 25310956 | A | 0   | 0      | G |
| 3 | G231f42S85             | 25312108 | T | 0   | 0      | A |
| 3 | BICF2S2458889          | 25325038 | G | 0   | 0      | A |
| 3 | BICF2P407379           | 25346499 | G | 0   | 0      | A |
| 3 | G232f29S243            | 25376520 | G | 0   | 0      | A |
| 3 | BICF2P202105           | 25398744 | 0 | 0   | 0      | A |

|   |                        |          |   |     |        |   |
|---|------------------------|----------|---|-----|--------|---|
| 3 | BICF2P1471305          | 25406842 | 0 | 0   | 0      | A |
| 3 | G233f29S171            | 25427121 | A | 0.5 | 0.2857 | C |
| 3 | BICF2P1362697          | 25465539 | 0 | 0   | 0      | A |
| 3 | BICF2S23751151         | 25477939 | A | NA  | 0.25   | G |
| 3 | TIGRP2P39533_rs8704484 | 25492353 | 0 | 0   | 0      | G |
| 3 | BICF2S23046425         | 25503305 | G | 0   | 0      | A |
| 3 | BICF2S2414722          | 25508635 | G | 0   | 0      | A |
| 3 | BICF2P553191           | 25537161 | C | 0   | 0      | A |
| 3 | G234f22S297            | 25567037 | 0 | 0   | 0      | A |
| 3 | BICF2P1414674          | 25596301 | G | 0   | 0      | A |
| 3 | BICF2S23911804         | 25620349 | G | 0   | 0.5    | A |
| 3 | BICF2S23324938         | 25630966 | A | 0   | 0.5    | G |
| 3 | BICF2P230811           | 25647436 | 0 | 0   | 0      | G |
| 3 | BICF2S23259979         | 25656748 | C | 0   | 0.5    | A |
| 3 | BICF2P389416           | 25679327 | G | 0   | 0.5    | A |
| 3 | BICF2P328536           | 25682735 | G | 0   | 0.5    | A |
| 3 | BICF2P1464927          | 25698880 | A | 0   | 0.5    | G |
| 3 | BICF2P184676           | 25709203 | G | 0   | 0.5    | A |
| 3 | BICF2P262945           | 25722340 | A | 0   | 0.5    | C |
| 3 | BICF2P1121278          | 25727109 | A | 0   | 0.5    | G |
| 3 | BICF2S23032154         | 25747407 | G | 0   | 0.5    | A |
| 3 | BICF2P1153944          | 25754784 | A | 0   | 0      | G |
| 3 | BICF2P131960           | 25790634 | 0 | 0   | 0      | G |
| 3 | BICF2P1097594          | 25809495 | 0 | 0   | 0      | A |
| 3 | BICF2S23655675         | 25825838 | G | 0   | 0      | A |
| 3 | BICF2P1017532          | 25861389 | G | 0   | 0      | A |
| 3 | TIGRP2P39575_rs8909431 | 25882960 | 0 | 0   | 0      | G |
| 3 | BICF2S2416461          | 25891108 | 0 | 0   | 0      | C |
| 3 | BICF2P1468746          | 25915104 | G | 0   | 0      | A |
| 3 | BICF2P954138           | 25921719 | 0 | 0   | 0      | C |
| 3 | BICF2P969157           | 25941336 | 0 | 0   | 0      | A |
| 3 | BICF2P31847            | 25958904 | A | 0   | 0      | G |
| 3 | BICF2S23130561         | 25996364 | A | 0.5 | 0.2857 | G |
| 3 | BICF2P1130908          | 26040200 | 0 | 0   | 0      | A |
| 3 | BICF2S23545557         | 26048569 | G | 0   | 0      | C |
| 3 | BICF2P949469           | 26091733 | A | 0   | 0      | G |
| 3 | BICF2S23535906         | 26101214 | A | 0   | 0      | G |
| 3 | BICF2P992327           | 26135807 | G | 0   | 0      | A |
| 3 | BICF2S2357429          | 26140385 | G | 0   | 0      | A |
| 3 | BICF2S23738401         | 26159968 | C | 1   | 1      | A |
| 3 | BICF2P973502           | 26166373 | A | 0   | 0      | G |
| 3 | BICF2P1257926          | 26180810 | A | 0   | 0.5    | G |
| 3 | BICF2P1506502          | 26191120 | A | 0   | 0      | G |
| 3 | BICF2P618822           | 26212315 | C | 0   | 0      | A |
| 3 | BICF2P1013068          | 26220527 | A | 0   | 0      | G |
| 3 | BICF2P525869           | 26245187 | A | 0   | 0      | G |
| 3 | BICF2P1393990          | 26257943 | G | 1   | 1      | A |

|   |                        |          |   |     |        |   |
|---|------------------------|----------|---|-----|--------|---|
| 3 | BICF2P506304           | 26269363 | G | 0   | 0.5    | A |
| 3 | BICF2S2293842          | 26280693 | A | 0   | 0      | G |
| 3 | BICF2P386807           | 26290081 | C | 0   | 0.5    | A |
| 3 | BICF2S23111278         | 26309064 | A | 0.5 | 0.7143 | G |
| 3 | BICF2S23447985         | 26316810 | A | 0.5 | 0.2857 | G |
| 3 | BICF2P19481            | 26336975 | G | 0   | 0.5    | A |
| 3 | BICF2P634314           | 26363858 | A | NA  | 0.8    | G |
| 3 | BICF2P926140           | 26369859 | A | 0   | 0      | C |
| 3 | TIGRP2P39585_rs8570590 | 26389159 | 0 | 0   | 0      | C |
| 3 | BICF2P557863           | 26399191 | A | 0.5 | 0.2143 | G |
| 3 | BICF2S23049495         | 26404558 | G | 0.5 | 0.7857 | A |
| 3 | BICF2P1056346          | 26420133 | A | 0   | 0      | T |
| 3 | BICF2P1414108          | 26427382 | A | 0   | 0      | G |
| 3 | BICF2P815348           | 26444974 | A | 0   | 0      | G |
| 3 | BICF2P904305           | 26454924 | G | 0   | 0      | A |
| 3 | BICF2P928905           | 26466190 | A | 0   | 0      | C |
| 3 | BICF2P1109448          | 26473163 | A | 0   | 0      | G |
| 3 | BICF2P162683           | 26485574 | G | 0   | 0      | A |
| 3 | BICF2P247820           | 26543188 | 0 | 0   | 0      | A |
| 3 | BICF2S23661479         | 26557956 | C | 0   | 0      | G |
| 3 | BICF2P839951           | 26565799 | G | 0   | 0      | A |
| 3 | BICF2P230345           | 26580009 | 0 | 0   | 0      | A |
| 3 | BICF2P892935           | 26590717 | G | 0   | 0      | A |
| 3 | BICF2P323914           | 26604337 | G | 0.5 | 0.7143 | A |
| 3 | BICF2P1272068          | 26617696 | 0 | 0   | 0      | A |
| 3 | BICF2P305031           | 26629323 | G | 0.5 | 0.7143 | A |
| 3 | BICF2P906090           | 26634672 | A | 0.5 | 0.7143 | G |
| 3 | BICF2P487494           | 26654672 | A | 0.5 | 0.7143 | G |
| 3 | BICF2S23020974         | 26662634 | A | 0.5 | 0.7143 | C |
| 3 | BICF2P795793           | 26676334 | 0 | 0   | 0      | A |
| 3 | BICF2P838944           | 26687529 | 0 | 0   | 0      | G |
| 3 | BICF2P71679            | 26700198 | G | 0.5 | 0.7143 | A |
| 3 | BICF2P1222117          | 26723056 | G | 0.5 | 0.7857 | A |
| 3 | BICF2P1026265          | 26735267 | 0 | 0   | 0      | G |
| 3 | BICF2P104847           | 26738656 | A | 0.5 | 0.2143 | G |
| 3 | BICF2P1336383          | 26749713 | G | 1   | 0.5    | A |
| 3 | BICF2S23450252         | 26760791 | G | 1   | 0.5    | A |
| 3 | BICF2P1387536          | 26779452 | A | 1   | 0.5    | G |
| 3 | BICF2S23144247         | 26793760 | G | 1   | 1      | A |
| 3 | BICF2P804534           | 26796016 | A | 1   | 1      | G |
| 3 | BICF2P213239           | 26819038 | 0 | 0   | 0      | T |
| 3 | BICF2P170026           | 26839490 | G | 0   | 0      | C |
| 3 | BICF2P786294           | 26854647 | C | 0.5 | 0.2857 | G |
| 3 | BICF2S23639760         | 26877172 | 0 | 0   | 0      | G |
| 3 | BICF2P433362           | 26911997 | A | 0   | 0.5    | C |
| 3 | BICF2P1093928          | 26927473 | G | 0   | 0.5    | C |
| 3 | BICF2P484725           | 26929046 | T | 0   | 0.5    | A |

|   |                |          |   |   |     |   |
|---|----------------|----------|---|---|-----|---|
| 3 | BICF2P707393   | 26937767 | G | 0 | 0.5 | A |
| 3 | BICF2P398233   | 26940248 | G | 1 | 1   | A |
| 3 | BICF2P882496   | 26952327 | G | 0 | 0.5 | A |
| 3 | BICF2P522592   | 26957127 | A | 0 | 0.5 | G |
| 3 | BICF2P1190     | 26969440 | 0 | 0 | 0   | A |
| 3 | BICF2S23734564 | 27000437 | A | 0 | 0.5 | T |
| 3 | BICF2S23537285 | 27002632 | A | 1 | 0.5 | G |
| 3 | BICF2P2488     | 27019426 | A | 0 | 0   | G |
| 3 | BICF2P1299857  | 27031306 | C | 0 | 0.5 | A |
| 3 | BICF2P522372   | 27037426 | G | 1 | 0.5 | A |
| 3 | BICF2P1188893  | 27049642 | A | 1 | 0.5 | G |
| 3 | BICF2S23143268 | 27062291 | G | 0 | 0   | A |
| 3 | BICF2P801025   | 27072503 | A | 0 | 0.5 | G |
| 3 | BICF2S23251194 | 27104661 | A | 0 | 0.5 | G |
| 3 | BICF2P965703   | 27107341 | 0 | 0 | 0   | A |
| 3 | BICF2P289076   | 27124402 | C | 0 | 0.5 | A |
| 3 | BICF2P1431987  | 27131195 | A | 0 | 0   | G |
| 3 | BICF2P548607   | 27141226 | 0 | 0 | 0   | A |
| 3 | BICF2S22943694 | 27152587 | C | 0 | 0.5 | G |
| 3 | BICF2P455281   | 27169426 | A | 0 | 0   | G |
| 3 | BICF2S23445983 | 27185563 | G | 0 | 0.5 | A |
| 3 | BICF2S23434272 | 27203016 | 0 | 0 | 0   | G |
| 3 | BICF2P879160   | 27229187 | 0 | 0 | 0   | A |
| 3 | BICF2S23729794 | 27237519 | A | 0 | 0.5 | G |
| 3 | BICF2P762254   | 27246859 | 0 | 0 | 0   | A |
| 3 | BICF2P904963   | 27263263 | 0 | 0 | 0   | G |
| 3 | BICF2P1420556  | 27266969 | 0 | 0 | 0   | A |
| 3 | BICF2P1410153  | 27282736 | 0 | 0 | 0   | A |
| 3 | BICF2P606301   | 27303479 | 0 | 0 | 0   | C |
| 3 | BICF2P1217355  | 27321334 | 0 | 0 | 0   | G |
| 3 | BICF2P1294181  | 27348322 | 0 | 0 | 0   | A |
| 3 | BICF2P343919   | 27409442 | 0 | 0 | 0   | A |
| 3 | BICF2P1129447  | 27430930 | 0 | 0 | 0   | G |
| 3 | BICF2P502138   | 27440789 | 0 | 0 | 0   | A |
| 3 | BICF2P243808   | 27455289 | 0 | 0 | 0   | G |
| 3 | BICF2S23625268 | 27465689 | G | 0 | 0   | A |
| 3 | BICF2S2394791  | 27476104 | G | 0 | 0.5 | A |
| 3 | BICF2P673244   | 27492245 | A | 0 | 0   | G |
| 3 | BICF2S22961979 | 27496567 | G | 0 | 0.5 | A |
| 3 | BICF2S2357596  | 27522282 | A | 1 | 0.5 | G |
| 3 | BICF2S23222621 | 27537681 | A | 0 | 0   | T |
| 3 | BICF2S2398146  | 27553186 | 0 | 0 | 0   | A |
| 3 | BICF2P104790   | 27564416 | A | 0 | 0   | T |
| 3 | BICF2P259318   | 27576863 | G | 1 | 0.5 | A |
| 3 | BICF2P390967   | 27586885 | C | 1 | 0.5 | A |
| 3 | BICF2P390970   | 27587058 | A | 1 | 0.5 | G |
| 3 | BICF2P366133   | 27589192 | A | 1 | 0.5 | G |

|   |                |          |   |     |        |   |
|---|----------------|----------|---|-----|--------|---|
| 3 | BICF2P46038    | 27602064 | 0 | 0   | 0      | A |
| 3 | BICF2P923955   | 27621820 | G | 0   | 0      | A |
| 3 | BICF2S23715427 | 27649262 | A | 0   | 0      | G |
| 3 | BICF2S2301082  | 27659324 | G | 0   | 0.5714 | A |
| 3 | BICF2P876619   | 27706926 | C | 1   | 0.4286 | A |
| 3 | BICF2S23325523 | 27715423 | A | 0   | 0      | G |
| 3 | BICF2P72852    | 27729965 | C | 0   | 0      | A |
| 3 | BICF2P792851   | 27742581 | A | 0   | 0      | G |
| 3 | BICF2P286736   | 27749630 | G | 0   | 0      | A |
| 3 | BICF2S23025088 | 27769218 | A | 0   | 0      | T |
| 3 | BICF2P833680   | 27778332 | G | 0.5 | 0.1429 | A |
| 3 | BICF2S23040767 | 27788552 | A | 0   | 0      | G |
| 3 | BICF2P901689   | 27804609 | A | 0   | 0      | G |
| 3 | BICF2P449184   | 27808018 | G | 0.5 | 0.1429 | A |
| 3 | BICF2P386907   | 27833506 | A | 0.5 | 0.1429 | G |
| 3 | BICF2P1182396  | 27846683 | 0 | 0   | 0      | G |
| 3 | BICF2P206483   | 27861785 | G | 1   | 0.4286 | A |
| 3 | BICF2S23225359 | 27869091 | C | 0   | 0      | G |
| 3 | BICF2S23316944 | 27883232 | A | 0   | 0      | T |
| 3 | BICF2P826176   | 27895457 | 0 | 0   | 0      | A |
| 3 | BICF2S23650428 | 27905563 | 0 | 0   | 0      | A |
| 3 | BICF2S23014760 | 27917659 | A | 0   | 0.5714 | G |
| 3 | BICF2P322726   | 27923254 | 0 | 0   | 0      | G |
| 3 | BICF2P496541   | 27942286 | G | 0   | 0      | A |
| 3 | BICF2P143014   | 27952916 | A | 0   | 0      | G |
| 3 | BICF2S23752096 | 27958271 | A | 0   | 0      | G |
| 3 | BICF2P830671   | 27972664 | C | 0   | 0.5714 | A |
| 3 | BICF2P1020933  | 27987015 | A | 0   | 0.5714 | G |
| 3 | BICF2S23523257 | 27996340 | A | 0   | 0.5714 | G |
| 3 | BICF2P370771   | 28005305 | A | 0   | 0.5714 | G |
| 3 | BICF2P638308   | 28014995 | G | 0.5 | 0.1429 | A |
| 3 | BICF2S23615024 | 28031123 | 0 | 0   | 0      | A |
| 3 | BICF2S23348565 | 28041026 | A | 0   | 0.6    | G |
| 3 | BICF2P1241730  | 28054319 | G | 0.5 | 0.7143 | A |
| 3 | BICF2P75457    | 28064273 | 0 | 0   | 0      | A |
| 3 | BICF2P1228706  | 28073814 | A | 0   | 0      | G |
| 3 | BICF2S23735831 | 28084913 | A | 0.5 | 0.1429 | G |
| 3 | BICF2S23428713 | 28104821 | G | 0.5 | 0.7143 | A |
| 3 | BICF2S23342014 | 28106511 | G | 0.5 | 0.7143 | A |
| 3 | BICF2S23644249 | 28119067 | G | 0.5 | 0.2857 | A |
| 3 | BICF2S2414730  | 28130150 | G | 0.5 | 0.2857 | A |
| 3 | BICF2P436531   | 28156450 | 0 | 0   | 0      | A |
| 3 | BICF2P159737   | 28167855 | G | 0.5 | 0.2857 | A |
| 3 | BICF2P161297   | 28182839 | G | 0.5 | 0.2857 | A |
| 3 | BICF2P1312074  | 28196051 | G | 0   | 0      | A |
| 3 | BICF2P770296   | 28200500 | A | 0   | 0      | G |
| 3 | BICF2P1128773  | 28217541 | 0 | 0   | 0      | A |

|   |                        |          |   |     |        |   |
|---|------------------------|----------|---|-----|--------|---|
| 3 | BICF2P1160610          | 28231024 | G | 0.5 | 0.2857 | A |
| 3 | BICF2P1277472          | 28242675 | C | 0   | 0      | A |
| 3 | BICF2P996731           | 28245451 | 0 | 0   | 0      | A |
| 3 | BICF2P800481           | 28257464 | G | 0.5 | 0.2857 | A |
| 3 | BICF2P418798           | 28273265 | 0 | 0   | 0      | C |
| 3 | BICF2P1375464          | 28289542 | A | 0   | 0      | C |
| 3 | BICF2P742446           | 28291082 | G | 0.5 | 0.2857 | A |
| 3 | BICF2P345904           | 28306859 | G | 0.5 | 0.125  | A |
| 3 | BICF2P1053435          | 28316632 | G | 0.5 | 0.2857 | A |
| 3 | BICF2P942722           | 28327765 | A | 1   | 1      | T |
| 3 | TIGRP2P39613_rs8521746 | 28344835 | 0 | 0   | 0      | G |
| 3 | BICF2P602810           | 28354775 | C | 0   | 0      | A |
| 3 | BICF2P1068506          | 28359706 | A | 0   | 0      | G |
| 3 | BICF2S23524749         | 28376427 | G | 0   | 0      | A |
| 3 | BICF2S23764041         | 28394120 | A | 0   | 0      | G |
| 3 | BICF2P686400           | 28412132 | A | 0.5 | 0.2857 | G |
| 3 | BICF2S23643545         | 28427238 | 0 | 0   | 0      | A |
| 3 | BICF2P888162           | 28444222 | A | 0   | 0      | T |
| 3 | BICF2P207058           | 28456599 | G | 0   | 0      | A |
| 3 | BICF2S23214831         | 28487970 | 0 | 0   | 0      | A |
| 3 | BICF2S23749747         | 28501151 | A | 0   | 0.5    | G |
| 3 | BICF2P214109           | 28514166 | G | 0.5 | 0.7143 | A |
| 3 | BICF2P602688           | 28520681 | G | 0   | 0      | C |
| 3 | BICF2P1275554          | 28538166 | G | 0   | 0      | A |
| 3 | BICF2P823712           | 28545513 | C | 0   | 0      | A |
| 3 | BICF2P345066           | 28557092 | G | 0   | 0      | A |
| 3 | TIGRP2P39619_rs8890737 | 28574281 | 0 | 0   | 0      | G |
| 3 | BICF2P335768           | 28583159 | A | 0   | 0      | C |
| 3 | BICF2P864385           | 28593142 | A | 0.5 | 0.2857 | T |
| 3 | BICF2P613099           | 28607094 | G | 0   | 0      | A |
| 3 | BICF2P968772           | 28627590 | A | 0   | 0      | C |
| 3 | BICF2P240284           | 28643478 | A | 0   | 0      | T |
| 3 | TIGRP2P39622_rs8875287 | 28672799 | 0 | 0   | 0      | C |
| 3 | BICF2P782360           | 28704455 | A | 0.5 | 0.2857 | G |
| 3 | BICF2P574188           | 28735452 | G | 0   | 0      | A |
| 3 | BICF2P1130462          | 28741419 | A | 0   | 0      | G |
| 3 | BICF2S23097            | 28758077 | C | 0.5 | 0.7143 | A |
| 3 | BICF2P1366454          | 28772873 | A | 0   | 0      | G |
| 3 | BICF2S23243416         | 28777614 | G | 0.5 | 0.2857 | A |
| 3 | BICF2S23258915         | 28789949 | A | 0   | 0      | G |
| 3 | BICF2P791792           | 28792461 | C | 0   | 0      | G |
| 3 | BICF2S23532408         | 28806139 | 0 | 0   | 0      | A |
| 3 | BICF2S2323387          | 28809330 | 0 | 0   | 0      | A |
| 3 | BICF2P1123096          | 28822700 | C | 0   | 0      | A |
| 3 | BICF2P71957            | 28831605 | 0 | 0   | 0      | A |
| 3 | BICF2S2355183          | 28849658 | G | 0.5 | 0.7143 | A |
| 3 | BICF2S23430651         | 28872678 | G | 0   | 0      | A |



|   |                |          |   |     |        |   |
|---|----------------|----------|---|-----|--------|---|
| 3 | BICF2P411143   | 28877013 | G | 0.5 | 0.7857 | A |
| 3 | BICF2P516268   | 28892832 | C | 0   | 0      | A |
| 3 | BICF2S23258887 | 28902757 | A | 0.5 | 0.2143 | G |
| 3 | BICF2S2337858  | 28913759 | A | 0   | 0      | G |
| 3 | BICF2P645291   | 28922948 | G | 0   | 0      | A |
| 3 | BICF2P110650   | 28940991 | G | 0.5 | 0.7857 | A |
| 3 | BICF2P224540   | 28945514 | C | 0.5 | 0.7857 | A |
| 3 | BICF2P77534    | 28957812 | 0 | 0   | 0      | G |
| 3 | BICF2P200069   | 28973331 | 0 | 0   | 0      | C |
| 3 | BICF2P237401   | 29002208 | T | 0.5 | 0.2857 | A |
| 3 | BICF2P101135   | 29004240 | C | 0   | 0      | A |
| 3 | BICF2P727795   | 29014860 | C | 0.5 | 0.2857 | A |
| 3 | BICF2P740499   | 29055962 | G | 0   | 0.5    | A |
| 3 | BICF2P449883   | 29062269 | G | 1   | 1      | A |
| 3 | BICF2S23057910 | 29081821 | A | 0.5 | 0.2857 | C |
| 3 | BICF2S23610777 | 29094728 | 0 | 0   | 0      | G |
| 3 | BICF2S2363826  | 29098746 | 0 | 0   | 0      | T |
| 3 | BICF2P760589   | 29110089 | A | 0.5 | 0.2857 | G |
| 3 | BICF2P448398   | 29123403 | C | 0   | 0      | A |
| 3 | BICF2P689243   | 29136015 | A | 0.5 | 0.2857 | G |
| 3 | BICF2S23761662 | 29149439 | G | 0   | 0      | A |
| 3 | BICF2P1125787  | 29154291 | A | 1   | 1      | C |
| 3 | BICF2P780704   | 29195208 | 0 | 0   | 0      | G |
| 3 | BICF2P449336   | 29210965 | A | 0.5 | 0.7143 | G |
| 3 | BICF2P1337760  | 29225806 | 0 | 0   | 0      | G |
| 3 | BICF2P184224   | 29236850 | 0 | 0   | 0      | A |
| 3 | BICF2P806955   | 29275088 | 0 | 0   | 0      | G |
| 3 | BICF2S2348799  | 29280939 | A | 1   | 0.5    | G |
| 3 | BICF2S23444014 | 29293918 | G | 1   | 0.5    | A |
| 3 | BICF2S23548777 | 29313767 | A | 1   | 0.5    | T |
| 3 | BICF2P1444593  | 29335571 | 0 | 0   | 0      | C |
| 3 | BICF2P191639   | 29346566 | A | 1   | 0.5    | C |
| 3 | BICF2P1436832  | 29351955 | 0 | 0   | 0      | G |
| 3 | BICF2S23731886 | 29370602 | G | 1   | 0.5    | A |
| 3 | BICF2P460793   | 29393488 | 0 | 0   | 0      | G |
| 3 | BICF2P1307080  | 29420007 | A | 1   | 1      | G |
| 3 | BICF2P817458   | 29429128 | A | 1   | 1      | G |
| 3 | BICF2P1089829  | 29440983 | A | 0.5 | 0.7857 | G |
| 3 | BICF2P741495   | 29459535 | A | 0   | 0      | G |
| 3 | BICF2S23732794 | 29465502 | G | 1   | 1      | A |
| 3 | BICF2P460360   | 29480798 | A | 1   | 0.5    | G |
| 3 | BICF2P430169   | 29499395 | G | 1   | 0.5    | A |
| 3 | BICF2P1143290  | 29526853 | A | 1   | 0.5    | G |
| 3 | BICF2S23024979 | 29545695 | A | 0   | 0      | T |
| 3 | BICF2P340942   | 29619350 | 0 | 0   | 0      | A |
| 3 | BICF2S2297262  | 29655385 | G | 0.5 | 0.2143 | A |
| 3 | BICF2S23425783 | 29660471 | G | 1   | 0.5    | A |

|   |                 |          |   |     |        |   |
|---|-----------------|----------|---|-----|--------|---|
| 3 | BICF2S23763170  | 29675904 | A | 0.5 | 0.2857 | G |
| 3 | BICF2S2299918   | 29688077 | G | 0   | 0      | A |
| 3 | BICF2P856855    | 29714061 | A | 0.5 | 0.2857 | T |
| 3 | BICF2P263446    | 29723351 | C | 0.5 | 0.2857 | A |
| 3 | BICF2S23048225  | 29728566 | C | 0.5 | 0.7857 | G |
| 3 | BICF2P790287    | 29749785 | A | 0   | 0.5    | G |
| 3 | BICF2P81531     | 29753289 | G | 0   | 0.5    | A |
| 3 | BICF2S23651049  | 29763908 | A | 1   | 0.5    | G |
| 3 | BICF2P1288047   | 29780756 | A | 0   | 0      | G |
| 3 | BICF2P309004    | 29783736 | G | 0   | 0      | A |
| 3 | BICF2P309003    | 29784015 | G | 0   | 0      | A |
| 3 | BICF2P781073    | 29790943 | A | 0.5 | 0.2143 | G |
| 3 | BICF2S23648843  | 29796684 | A | 0.5 | 0.7857 | G |
| 3 | BICF2P1271157   | 29827992 | A | 0   | 0      | G |
| 3 | BICF2S22925934  | 29840342 | A | 0   | 0      | C |
| 3 | BICF2S2327436   | 29847427 | C | 0   | 0      | A |
| 3 | BICF2P1452462   | 29855599 | A | 0   | 0      | G |
| 3 | BICF2S2346956   | 29869180 | C | 0   | 0      | A |
| 3 | BICF2P367760    | 29889879 | C | 1   | 0.5714 | A |
| 3 | BICF2P270615    | 29900815 | A | 1   | 0.5714 | G |
| 3 | BICF2P1011366   | 29903841 | A | 1   | 0.5714 | G |
| 3 | BICF2S2413225   | 29922674 | 0 | 0   | 0      | C |
| 3 | BICF2S23647639  | 29945170 | 0 | 0   | 0      | A |
| 3 | BICF2S23644295  | 29949728 | G | 0   | 0      | A |
| 3 | BICF2P415349    | 29965076 | G | 0   | 0.4286 | A |
| 3 | BICF2P357166    | 29984124 | A | 0   | 0.4286 | G |
| 3 | BICF2S23329646  | 30002398 | C | 0.5 | 0.7143 | G |
| 3 | BICF2S23329647  | 30002474 | A | 0.5 | 0.2857 | G |
| 3 | BICF2P724336    | 30010206 | C | 0   | 0      | G |
| 3 | BICF2P926172    | 30019018 | A | 0.5 | 0.2857 | G |
| 3 | BICF2P881821    | 30032848 | A | 0   | 0      | C |
| 3 | BICF2S23252486  | 30046076 | A | 0   | 0      | C |
| 3 | BICF2S23445287  | 30059175 | A | 0.5 | 0.2857 | G |
| 3 | BICF2S23658664  | 30063590 | G | 1   | 0.5714 | A |
| 3 | BICF2P1194662   | 30082394 | G | 0   | 0.4286 | A |
| 3 | BICF2P453152    | 30086301 | 0 | 0   | 0      | C |
| 3 | BICF2P1071875   | 30098076 | G | 0   | 0.4286 | A |
| 3 | BICF2P1095750   | 30114576 | A | 0   | 0      | G |
| 3 | BICF2S23554724  | 30140191 | A | 1   | 0.5714 | C |
| 3 | BICF2S23244025  | 30145544 | A | 1   | 0.5714 | G |
| 3 | BICF2P94176     | 30157239 | 0 | 0   | 0      | A |
| 3 | BICF2G630704173 | 30164905 | G | 0   | 0      | A |
| 3 | BICF2G630704177 | 30178909 | A | 0   | 0      | G |
| 3 | BICF2G630704182 | 30196894 | A | 0   | 0      | G |
| 3 | BICF2P353885    | 30200899 | T | 1   | 1      | A |
| 3 | BICF2P276702    | 30215138 | A | 0   | 0.4286 | G |
| 3 | BICF2P560963    | 30229810 | G | 0   | 0      | A |

|   |                 |          |   |     |        |   |
|---|-----------------|----------|---|-----|--------|---|
| 3 | BICF2P1303290   | 30241896 | A | 0.5 | 0.7143 | G |
| 3 | BICF2P770273    | 30252773 | G | 0   | 0      | A |
| 3 | BICF2S23035822  | 30263752 | G | 0   | 0      | A |
| 3 | BICF2P1360705   | 30268826 | C | 0   | 0      | A |
| 3 | BICF2P1109038   | 30287124 | A | 0   | 0      | G |
| 3 | BICF2G630704234 | 30294194 | A | 0   | 0      | G |
| 3 | BICF2G630704243 | 30304187 | G | 0.5 | 0.7143 | A |
| 3 | BICF2G630704249 | 30314493 | A | 0.5 | 0.7143 | G |
| 3 | BICF2G630704261 | 30326469 | G | 0   | 0      | A |
| 3 | BICF2G630704278 | 30346668 | G | 0   | 0      | A |
| 3 | BICF2G630704284 | 30352582 | G | 1   | 1      | A |
| 3 | BICF2P930463    | 30364362 | T | 1   | 1      | A |
| 3 | BICF2P495845    | 30382865 | C | 0   | 0      | G |
| 3 | BICF2P197385    | 30404020 | A | 0   | 0      | G |
| 3 | BICF2S23762981  | 30416931 | G | 1   | 1      | A |
| 3 | BICF2G630704292 | 30428922 | A | 0   | 0      | G |
| 3 | BICF2S23240902  | 30430108 | G | 0   | 0      | A |
| 3 | BICF2G630704294 | 30451610 | A | 0   | 0      | G |
| 3 | BICF2S23452927  | 30457794 | G | 0.5 | 0.7143 | A |
| 3 | BICF2P456217    | 30472754 | 0 | 0   | 0      | C |
| 3 | BICF2S23225389  | 30503827 | C | 0.5 | 0.2857 | A |
| 3 | BICF2G630704298 | 30530775 | C | 1   | 0.5714 | A |
| 3 | BICF2P1166071   | 30540146 | 0 | 0   | 0      | A |
| 3 | BICF2G630704313 | 30550559 | A | 1   | 1      | G |
| 3 | BICF2G630704329 | 30568341 | A | 0.5 | 0.2857 | G |
| 3 | BICF2P400976    | 30581602 | G | 0   | 0      | A |
| 3 | BICF2G630704343 | 30597963 | G | 0   | 0      | A |
| 3 | BICF2G630704365 | 30606257 | A | 0.5 | 0.2857 | G |
| 3 | BICF2P1176933   | 30613475 | G | 0.5 | 0.2857 | A |
| 3 | BICF2G630704404 | 30629414 | G | 0   | 0      | A |
| 3 | BICF2G630704414 | 30636006 | A | 0.5 | 0.2857 | G |
| 3 | BICF2G630704432 | 30648725 | G | 1   | 1      | A |
| 3 | BICF2P660895    | 30653466 | G | 0   | 0      | A |
| 3 | BICF2G630704438 | 30659663 | G | 0.5 | 0.2857 | A |
| 3 | BICF2G630704445 | 30674008 | G | 0.5 | 0.2857 | A |
| 3 | BICF2P58672     | 30684680 | A | 0.5 | 0.7143 | G |
| 3 | BICF2P58673     | 30684786 | A | 0   | 0      | G |
| 3 | BICF2S23540887  | 30695678 | A | 0.5 | 0.2857 | G |
| 3 | BICF2S23723565  | 30716444 | A | 1   | 0.5714 | G |
| 3 | BICF2P1125729   | 30727645 | 0 | 0   | 0      | A |
| 3 | BICF2P1259920   | 30756492 | G | 0   | 0.4286 | A |
| 3 | BICF2P664113    | 30774041 | G | 0.5 | 0.7143 | A |
| 3 | BICF2G630704471 | 30782110 | A | 0.5 | 0.7143 | G |
| 3 | BICF2G630704480 | 30792459 | 0 | 0   | 0      | G |
| 3 | BICF2G630704490 | 30799265 | G | 0   | 0.4286 | A |
| 3 | BICF2G630704511 | 30812031 | 0 | 0   | 0      | G |
| 3 | BICF2G630704526 | 30828281 | 0 | 0   | 0      | G |

|   |                 |          |   |     |        |   |
|---|-----------------|----------|---|-----|--------|---|
| 3 | BICF2G630704534 | 30832167 | A | 0.5 | 0.2857 | G |
| 3 | BICF2G630704559 | 30845264 | A | 0   | 0      | G |
| 3 | BICF2S23126266  | 30854820 | G | 0   | 0      | A |
| 3 | BICF2P716862    | 30874316 | G | 0   | 0      | A |
| 3 | BICF2G630704573 | 30878182 | 0 | 0   | 0      | G |
| 3 | BICF2P1034072   | 30899994 | G | 1   | 1      | A |
| 3 | BICF2P1034065   | 30900841 | G | 1   | 1      | A |
| 3 | BICF2P1049492   | 30919589 | A | 0.5 | 0.7143 | C |
| 3 | BICF2G630704599 | 30927673 | A | 1   | 1      | G |
| 3 | BICF2P967997    | 30939044 | A | 0   | 0      | G |
| 3 | BICF2G630704611 | 30942338 | A | 1   | 1      | G |
| 3 | BICF2G630704618 | 30949459 | A | 0   | 0      | C |
| 3 | BICF2S22931067  | 30958746 | A | 0   | 0      | G |
| 3 | BICF2G630704630 | 30969875 | A | 1   | 1      | G |
| 3 | BICF2G630704655 | 30986655 | C | 0   | 0      | A |
| 3 | BICF2G630704675 | 30994201 | A | 0   | 0      | G |
| 3 | BICF2G630704681 | 30995913 | A | 0   | 0      | G |
| 3 | BICF2G630704697 | 31010174 | C | 0   | 0      | A |
| 3 | BICF2G630704706 | 31018587 | G | 0   | 0      | A |
| 3 | BICF2G630704717 | 31028777 | A | 0   | 0      | C |
| 3 | BICF2G630704731 | 31046254 | G | 0.5 | 0.2857 | A |
| 3 | BICF2P752461    | 31058687 | A | 0   | 0      | G |
| 3 | BICF2G630704753 | 31059268 | G | 0   | 0      | A |
| 3 | BICF2G630704758 | 31063890 | A | 0   | 0      | G |
| 3 | BICF2G630704771 | 31076651 | G | 1   | 1      | A |
| 3 | BICF2G630704786 | 31082395 | G | 0   | 0      | A |
| 3 | BICF2G630704796 | 31086846 | 0 | 0   | 0      | A |
| 3 | BICF2G630704818 | 31103574 | G | 0   | 0      | A |
| 3 | BICF2G630704825 | 31108824 | G | 0.5 | 0.2857 | A |
| 3 | BICF2G630704841 | 31119989 | A | 0.5 | 0.7143 | G |
| 3 | BICF2G630704846 | 31132471 | A | 1   | 1      | G |
| 3 | BICF2P37982     | 31153482 | 0 | 0   | 0      | C |
| 3 | BICF2G630704855 | 31163217 | A | 1   | 1      | G |
| 3 | BICF2G630704858 | 31165850 | A | 0   | 0      | G |
| 3 | BICF2G630704866 | 31187342 | A | 0   | 0      | G |
| 3 | BICF2G630704870 | 31199538 | A | 0   | 0      | T |
| 3 | BICF2G630704876 | 31221809 | A | 0   | 0      | G |
| 3 | BICF2G630704880 | 31235088 | A | 1   | 1      | G |
| 3 | BICF2G630704885 | 31248499 | A | 1   | 1      | G |
| 3 | BICF2S23642809  | 31278767 | 0 | 0   | 0      | A |
| 3 | BICF2G630704902 | 31286025 | G | 0   | 0      | A |
| 3 | BICF2G630704907 | 31303177 | A | 1   | 1      | G |
| 3 | BICF2G630704922 | 31315152 | G | NA  | 0      | A |
| 3 | BICF2S22964837  | 31328839 | A | 0.5 | 0.7143 | G |
| 3 | BICF2G630704954 | 31341807 | G | 1   | 1      | A |
| 3 | BICF2G630704959 | 31351957 | C | 0.5 | 0.2857 | A |
| 3 | BICF2G630704969 | 31365788 | G | 1   | 1      | A |

|   |                        |          |   |     |        |   |
|---|------------------------|----------|---|-----|--------|---|
| 3 | BICF2G630704980        | 31383210 | A | 1   | 1      | C |
| 3 | BICF2G630704981        | 31390024 | A | 0   | 0      | G |
| 3 | BICF2G630704986        | 31404003 | A | 1   | 1      | G |
| 3 | BICF2G630704988        | 31412314 | A | 0   | 0      | G |
| 3 | BICF2G630704999        | 31430685 | A | 0   | 0      | C |
| 3 | BICF2G630705003        | 31449574 | A | 0   | 0      | G |
| 3 | BICF2P445265           | 31462933 | 0 | 0   | 0      | A |
| 3 | BICF2G630705006        | 31465329 | G | 1   | 1      | A |
| 3 | BICF2G630705012        | 31475837 | A | 1   | 1      | G |
| 3 | BICF2G630705021        | 31490103 | T | 0   | 0      | A |
| 3 | BICF2P130112           | 31508547 | A | 1   | 1      | G |
| 3 | BICF2G630705026        | 31514418 | G | 0   | 0      | A |
| 3 | BICF2G630705031        | 31527000 | A | 1   | 1      | G |
| 3 | BICF2G630705033        | 31536128 | G | 1   | 1      | A |
| 3 | BICF2P994292           | 31570799 | A | 1   | 1      | G |
| 3 | BICF2G630705040        | 31587223 | C | 1   | 1      | A |
| 3 | BICF2P1236507          | 31613155 | A | 0   | 0      | G |
| 3 | BICF2G630705049        | 31621990 | A | 1   | 1      | T |
| 3 | BICF2G630705050        | 31636088 | G | 1   | 1      | A |
| 3 | BICF2G630705053        | 31643473 | C | 0   | 0      | A |
| 3 | BICF2G630705055        | 31648935 | G | 0.5 | 0.7143 | A |
| 3 | BICF2G630705065        | 31663879 | A | 0   | 0      | G |
| 3 | BICF2G630705075        | 31677319 | G | 0.5 | 0.2857 | A |
| 3 | BICF2G630705081        | 31684376 | G | 0   | 0      | A |
| 3 | BICF2P1178293          | 31698752 | C | 0   | 0      | A |
| 3 | BICF2S2398896          | 31735251 | A | 0   | 0      | G |
| 3 | BICF2G630705098        | 31747696 | A | 0   | 0      | G |
| 3 | BICF2P1078994          | 31759214 | 0 | 0   | 0      | A |
| 3 | BICF2G630705111        | 31766592 | G | 0   | 0      | C |
| 3 | BICF2G630705112        | 31767817 | A | 0   | 0      | C |
| 3 | BICF2G630705117        | 31776343 | G | 0   | 0      | A |
| 3 | BICF2G630705122        | 31786693 | G | 0   | 0      | A |
| 3 | BICF2G630705143        | 31797925 | G | 0   | 0      | A |
| 3 | BICF2G630705163        | 31808118 | A | 0   | 0      | G |
| 3 | BICF2G630705183        | 31815866 | G | 0   | 0      | A |
| 3 | BICF2G630705201        | 31838535 | A | 0.5 | 0.7143 | G |
| 3 | BICF2S229611           | 31848617 | A | 0.5 | 0.7143 | G |
| 3 | BICF2G630705205        | 31859418 | A | 0   | 0      | G |
| 3 | BICF2S2296215          | 31871611 | T | 0.5 | 0.7143 | A |
| 3 | TIGRP2P39723_rs9214006 | 31885867 | 0 | 0   | 0      | G |
| 3 | BICF2P1357679          | 31907677 | 0 | 0   | 0      | G |
| 3 | BICF2P776848           | 31917926 | 0 | 0   | 0      | A |
| 3 | BICF2S23016713         | 31924305 | 0 | 0   | 0      | C |
| 3 | BICF2S23250152         | 31949049 | G | 0   | 0      | A |
| 3 | BICF2G630705208        | 31965120 | G | 0.5 | 0.7143 | A |
| 3 | BICF2G630705216        | 31974944 | G | 0.5 | 0.7143 | A |
| 3 | BICF2G630705224        | 32006992 | 0 | 0   | 0      | A |

|   |                 |          |   |     |        |   |
|---|-----------------|----------|---|-----|--------|---|
| 3 | BICF2S2375078   | 32049502 | G | 0   | 0      | A |
| 3 | BICF2G630705240 | 32052421 | A | 0.5 | 0.7143 | G |
| 3 | BICF2G630705251 | 32075009 | A | 0   | 0      | G |
| 3 | BICF2G630705257 | 32100451 | C | 0.5 | 0.7143 | A |
| 3 | BICF2G630705263 | 32118134 | G | 0.5 | 0.7143 | A |
| 3 | BICF2G630705266 | 32130229 | C | 0.5 | 0.75   | A |
| 3 | BICF2G630705273 | 32140551 | A | NA  | 0.75   | G |
| 3 | BICF2P902519    | 32143064 | A | 0.5 | 0.7143 | G |
| 3 | BICF2G630705279 | 32155318 | G | 0.5 | 0.7143 | A |
| 3 | BICF2G630705282 | 32173118 | G | 1   | 1      | A |
| 3 | BICF2G630705287 | 32181622 | G | 0.5 | 0.7143 | A |
| 3 | BICF2G630705306 | 32188869 | G | 1   | 1      | A |
| 3 | BICF2P487670    | 32206022 | 0 | 0   | 0      | T |
| 3 | BICF2P659009    | 32212094 | A | 1   | 1      | G |
| 3 | BICF2G630705323 | 32259408 | A | 1   | 1      | G |
| 3 | BICF2S22957004  | 32280342 | G | 0   | 0      | A |
| 3 | BICF2G630705335 | 32288273 | C | 1   | 1      | G |
| 3 | BICF2G630705339 | 32292208 | G | 1   | 1      | C |
| 3 | BICF2G630705340 | 32292529 | G | 0   | 0      | A |
| 3 | BICF2G630705371 | 32310426 | G | 0   | 0      | A |
| 3 | BICF2P861454    | 32324218 | A | 0   | 0      | G |
| 3 | BICF2G630705409 | 32342708 | A | 1   | 1      | G |
| 3 | BICF2G630705420 | 32353173 | G | 1   | 1      | A |
| 3 | BICF2G630705432 | 32362648 | G | 0.5 | 0.7143 | A |
| 3 | BICF2G630705449 | 32378037 | A | 0.5 | 0.7143 | G |
| 3 | BICF2P23073     | 32384818 | A | 0.5 | 0.7143 | C |
| 3 | BICF2P377786    | 32396152 | A | 0   | 0      | G |
| 3 | BICF2P1198425   | 32422534 | 0 | 0   | 0      | G |
| 3 | BICF2P248854    | 32423725 | A | 0   | 0      | G |
| 3 | BICF2G630705502 | 32433719 | C | 1   | 1      | A |
| 3 | BICF2P1281057   | 32447848 | G | 1   | 1      | A |
| 3 | BICF2P239967    | 32452666 | G | 1   | 1      | A |
| 3 | BICF2P285460    | 32455613 | A | 1   | 1      | C |
| 3 | BICF2P903929    | 32471455 | 0 | 0   | 0      | G |
| 3 | BICF2P967684    | 32480197 | G | 0   | 0      | A |
| 3 | BICF2G630705512 | 32496591 | A | 0   | 0      | G |
| 3 | BICF2G630705517 | 32501214 | G | 0   | 0      | A |
| 3 | BICF2S23752143  | 32512991 | C | 0   | 0      | A |
| 3 | BICF2G630705527 | 32524889 | G | 0   | 0      | A |
| 3 | BICF2G630705534 | 32534135 | G | 0   | 0      | A |
| 3 | BICF2G630705546 | 32545547 | T | 0   | 0      | A |
| 3 | BICF2G630705568 | 32561687 | A | 0   | 0      | G |
| 3 | BICF2G630705581 | 32570844 | C | 0   | 0      | A |
| 3 | BICF2G630705602 | 32584223 | C | 0   | 0      | G |
| 3 | BICF2G630705641 | 32610115 | G | 1   | 1      | A |
| 3 | BICF2G630705644 | 32614257 | A | 0   | 0      | G |
| 3 | BICF2G630705661 | 32630689 | A | 0   | 0      | G |

|   |                        |          |   |     |        |   |
|---|------------------------|----------|---|-----|--------|---|
| 3 | BICF2S23414795         | 32640922 | A | 0   | 0      | G |
| 3 | BICF2S2349746          | 32650063 | A | 0   | 0      | G |
| 3 | BICF2S23429852         | 32662716 | G | 0   | 0      | A |
| 3 | BICF2P1265387          | 32677764 | G | 0   | 0      | A |
| 3 | BICF2P442410           | 32684962 | G | 0   | 0      | A |
| 3 | BICF2P629029           | 32695675 | A | 0   | 0      | G |
| 3 | BICF2P1107935          | 32710231 | G | 0   | 0      | A |
| 3 | BICF2P1421518          | 32728138 | A | 0   | 0      | G |
| 3 | BICF2G630705690        | 32736491 | A | 0.5 | 0.7143 | G |
| 3 | BICF2P764513           | 32756555 | G | 0   | 0      | C |
| 3 | BICF2P193367           | 32768775 | A | 0.5 | 0.7143 | C |
| 3 | BICF2G630705724        | 32786259 | 0 | 0   | 0      | A |
| 3 | BICF2S23231085         | 32795114 | G | 0.5 | 0.7143 | A |
| 3 | BICF2G630705733        | 32825332 | A | 0   | 0      | C |
| 3 | BICF2G630705734        | 32845906 | 0 | 0   | 0      | A |
| 3 | BICF2S23713941         | 32856098 | T | 0   | 0      | A |
| 3 | BICF2S23339717         | 32888077 | C | 0   | 0      | A |
| 3 | BICF2S23659169         | 32898928 | A | 0   | 0      | C |
| 3 | BICF2G630705740        | 32909640 | 0 | 0   | 0      | C |
| 3 | BICF2G630705745        | 32913190 | A | 1   | 1      | C |
| 3 | BICF2P613112           | 32927987 | G | 0   | 0      | A |
| 3 | BICF2S23742266         | 32937335 | G | 0   | 0      | A |
| 3 | BICF2S2367305          | 32960201 | 0 | 0   | 0      | G |
| 3 | BICF2G630705758        | 32974334 | A | 0.5 | 0.2857 | T |
| 3 | BICF2G630705760        | 32988952 | A | 0.5 | 0.7143 | G |
| 3 | TIGRP2P39739_rs8684241 | 32996855 | 0 | 0   | 0      | A |
| 3 | BICF2S23545014         | 33008129 | G | 0   | 0      | A |
| 3 | BICF2G630705768        | 33019606 | A | 0.5 | 0.7143 | G |
| 3 | BICF2G630705781        | 33029540 | G | 0   | 0      | A |
| 3 | BICF2G630705795        | 33047875 | A | 0.5 | 0.7143 | G |
| 3 | BICF2G630705808        | 33058973 | A | 0   | 0      | G |
| 3 | BICF2G630705819        | 33061677 | A | 0   | 0      | G |
| 3 | BICF2P1092111          | 33063475 | A | 0   | 0      | G |
| 3 | BICF2G630705826        | 33078978 | A | 0.5 | 0.2857 | G |
| 3 | BICF2G630705838        | 33092025 | G | 0.5 | 0.2857 | A |
| 3 | BICF2P1278218          | 33103918 | 0 | 0   | 0      | G |
| 3 | BICF2S23643528         | 33117632 | A | 0   | 0      | C |
| 3 | BICF2G630705846        | 33129258 | A | 0.5 | 0.2857 | C |
| 3 | BICF2G630705853        | 33135447 | G | 0.5 | 0.7143 | A |
| 3 | BICF2G630705869        | 33149098 | C | 0.5 | 0.7143 | G |
| 3 | BICF2G630705902        | 33157327 | A | 0.5 | 0.2857 | G |
| 3 | BICF2G630705915        | 33167800 | A | NA  | NA     | G |
| 3 | BICF2G630705928        | 33180856 | G | 0.5 | 0.2857 | A |
| 3 | BICF2G630705941        | 33186081 | A | 0.5 | 0.2857 | G |
| 3 | BICF2G630705955        | 33191286 | G | 0.5 | 0.2857 | A |
| 3 | BICF2G630705959        | 33202953 | A | 0.5 | 0.2857 | G |
| 3 | BICF2G630705972        | 33212987 | G | 0.5 | 0.7143 | A |

|   |                 |          |   |     |        |   |
|---|-----------------|----------|---|-----|--------|---|
| 3 | BICF2G630705993 | 33230289 | A | 0.5 | 0.2857 | G |
| 3 | BICF2P991639    | 33242179 | A | 1   | 1      | G |
| 3 | BICF2G630706010 | 33257555 | A | 0.5 | 0.2857 | G |
| 3 | BICF2G630706014 | 33259058 | G | 0.5 | 0.2857 | A |
| 3 | BICF2G630706024 | 33269536 | A | 0.5 | 0.2857 | G |
| 3 | BICF2S22916507  | 33289605 | A | 0   | 0      | G |
| 3 | BICF2G630706034 | 33294225 | 0 | 0   | 0      | A |
| 3 | BICF2S23727801  | 33307583 | A | 1   | 1      | C |
| 3 | BICF2G630706036 | 33319356 | 0 | 0   | 0      | G |
| 3 | BICF2P1122760   | 33332930 | 0 | 0   | 0      | A |
| 3 | BICF2P802963    | 33355812 | 0 | 0   | 0      | A |
| 3 | BICF2P497923    | 33401415 | 0 | 0   | 0      | G |
| 3 | BICF2G630706040 | 33409702 | A | 0   | 0      | C |
| 3 | BICF2G630706066 | 33426570 | A | 0.5 | 0.2857 | T |
| 3 | BICF2G630706092 | 33431598 | G | 0.5 | 0.2857 | A |
| 3 | BICF2G630706144 | 33448055 | G | 0   | 0      | A |
| 3 | BICF2G630706155 | 33453932 | A | 0.5 | 0.25   | C |
| 3 | BICF2G630706178 | 33472405 | A | 0   | 0      | G |
| 3 | BICF2G630706180 | 33481012 | G | 0.5 | 0.2857 | A |
| 3 | BICF2G630706186 | 33488468 | C | 1   | 1      | A |
| 3 | BICF2G630706195 | 33501404 | A | 1   | 1      | G |
| 3 | BICF2G630706227 | 33518965 | G | 1   | 1      | A |
| 3 | BICF2G630706242 | 33524946 | C | 1   | 1      | A |
| 3 | BICF2P95479     | 33538034 | A | 0   | 0      | G |
| 3 | BICF2P697415    | 33547058 | G | 0   | 0      | A |
| 3 | BICF2P1299715   | 33558213 | C | 0   | 0      | A |
| 3 | BICF2P612073    | 33574710 | C | 0   | 0      | A |
| 3 | BICF2G630706333 | 33591366 | C | 1   | 1      | A |
| 3 | BICF2G630706335 | 33592851 | A | 0.5 | 0.7143 | C |
| 3 | BICF2G630706365 | 33605155 | A | 1   | 1      | G |
| 3 | BICF2G630706394 | 33618785 | A | 1   | 1      | G |
| 3 | BICF2G630706414 | 33629238 | A | 1   | 1      | G |
| 3 | BICF2G630706437 | 33640691 | G | 1   | 1      | A |
| 3 | BICF2G630706466 | 33657014 | G | 1   | 1      | A |
| 3 | BICF2G630706475 | 33661746 | A | 0   | 0      | G |
| 3 | BICF2S23437266  | 33676674 | A | 0.5 | 0.2857 | G |
| 3 | BICF2G630706494 | 33689223 | G | 0.5 | 0.7143 | A |
| 3 | BICF2G630706502 | 33701236 | G | 1   | 1      | A |
| 3 | BICF2P73373     | 33710931 | A | 0   | 0      | G |
| 3 | BICF2G630706525 | 33725374 | G | 1   | 1      | A |
| 3 | BICF2G630706539 | 33731118 | A | 1   | 1      | G |
| 3 | BICF2G630706558 | 33745101 | A | 0.5 | 0.7143 | C |
| 3 | BICF2P1027575   | 33753076 | 0 | 0   | 0      | C |
| 3 | BICF2G630706563 | 33767315 | A | 0.5 | 0.7143 | G |
| 3 | BICF2G630706571 | 33793939 | A | 0.5 | 0.7143 | G |
| 3 | BICF2G630706574 | 33805116 | A | 0   | 0      | G |
| 3 | BICF2G630706577 | 33818106 | A | 0.5 | 0.7143 | G |



|   |                        |          |   |     |        |   |
|---|------------------------|----------|---|-----|--------|---|
| 3 | BICF2G630706588        | 33836297 | G | 0.5 | 0.7143 | A |
| 3 | BICF2G630706597        | 33855550 | G | 0.5 | 0.75   | A |
| 3 | BICF2G630706598        | 33856364 | G | 0.5 | 0.7143 | A |
| 3 | BICF2G630706607        | 33870369 | A | 0.5 | 0.7143 | G |
| 3 | BICF2S23155837         | 33881474 | G | 0.5 | 0.7143 | A |
| 3 | BICF2G630706642        | 33908473 | G | 0.5 | 0.7143 | A |
| 3 | BICF2G630706643        | 33914503 | A | 0.5 | 0.7143 | G |
| 3 | BICF2P765488           | 33936454 | 0 | 0   | 0      | G |
| 3 | BICF2P1499671          | 33938353 | A | 1   | 1      | G |
| 3 | BICF2G630706670        | 33953622 | G | 1   | 1      | A |
| 3 | BICF2P466165           | 33978007 | 0 | 0   | 0      | G |
| 3 | BICF2S23440746         | 33984799 | A | 0   | 0      | G |
| 3 | BICF2G630706686        | 34102925 | C | 0   | 0      | A |
| 3 | BICF2G630706693        | 34117330 | A | 0.5 | 0.2857 | C |
| 3 | BICF2G630706701        | 34122261 | A | 0.5 | 0.7143 | C |
| 3 | BICF2G630706724        | 34154652 | G | 0.5 | 0.7    | A |
| 3 | BICF2P94158            | 34204620 | G | 0.5 | 0.7143 | A |
| 3 | BICF2G630707076        | 34281738 | A | 0.5 | 0.75   | G |
| 3 | BICF2P751515           | 34304944 | 0 | 0   | 0      | A |
| 3 | BICF2G630707194        | 34358044 | A | NA  | 0.75   | G |
| 3 | BICF2G630707245        | 34396539 | G | 0.5 | 0.7143 | A |
| 3 | BICF2G630707288        | 34409175 | A | 0.5 | 0.7143 | G |
| 3 | BICF2G630707421        | 34471250 | A | 0.5 | 0.2857 | G |
| 3 | BICF2G630707455        | 34483695 | G | 0.5 | 0.2    | A |
| 3 | BICF2G630707484        | 34488618 | G | NA  | 0.25   | A |
| 3 | TIGRP2P41019_rs8572873 | 34508399 | 0 | 0   | 0      | G |
| 3 | G236f20S298            | 34524018 | 0 | 0   | 0      | A |
| 3 | BICF2G630337470        | 34560969 | G | 0.5 | 0.7143 | A |
| 3 | BICF2G630337477        | 34568242 | 0 | 0   | 0      | G |
| 3 | BICF2G630337478        | 34570718 | G | 0.5 | 0.7143 | A |
| 3 | BICF2G630337484        | 34580593 | 0 | 0   | 0      | G |
| 3 | BICF2G630337494        | 34600733 | G | 0.5 | 0.7143 | A |
| 3 | BICF2G630337498        | 34604177 | G | 0.5 | 0.75   | A |
| 3 | BICF2G630337517        | 34620335 | 0 | 0   | 0      | G |
| 3 | BICF2P756511           | 34630563 | G | 0.5 | 0.7143 | C |
| 3 | BICF2G630337535        | 34643976 | A | 0.5 | 0.7143 | G |
| 3 | BICF2G630337540        | 34650557 | A | 0.5 | 0.75   | G |
| 3 | BICF2G630337555        | 34668969 | G | 0.5 | 0.7143 | A |
| 3 | BICF2G630337562        | 34672648 | A | 0.5 | 0.7143 | G |
| 3 | BICF2G630337567        | 34690200 | 0 | 0   | 0      | C |
| 3 | BICF2G630337573        | 34707206 | 0 | 0   | 0      | G |
| 3 | BICF2G630337587        | 34725254 | G | 0.5 | 0.7143 | C |
| 3 | BICF2G630337590        | 34731190 | 0 | 0   | 0      | A |
| 3 | BICF2P331952           | 34756985 | 0 | 0   | 0      | A |
| 3 | BICF2G630337624        | 34786449 | G | 0.5 | 0.7143 | A |
| 3 | BICF2S22954524         | 34787576 | A | 0.5 | 0.7143 | G |
| 3 | BICF2S22958963         | 34806577 | G | 0.5 | 0.7143 | A |

|   |                        |          |   |     |        |   |
|---|------------------------|----------|---|-----|--------|---|
| 3 | BICF2G630337644        | 34817750 | 0 | 0   | 0      | A |
| 3 | BICF2G630337648        | 34848173 | G | 0.5 | 0.2857 | A |
| 3 | G237f18S270            | 34871640 | G | 0   | 0      | A |
| 3 | BICF2G630337653        | 34900126 | A | 0   | 0      | C |
| 3 | BICF2P876861           | 34935041 | 0 | 0   | 0      | A |
| 3 | BICF2P386701           | 34953626 | 0 | 0   | 0      | T |
| 3 | BICF2G630337661        | 34976633 | 0 | 0   | 0      | A |
| 3 | BICF2G630337662        | 34988865 | A | 0   | 0      | C |
| 3 | BICF2G630337665        | 35027351 | A | 0   | 0      | G |
| 3 | BICF2G630337669        | 35058381 | A | 0.5 | 0.2857 | C |
| 3 | G238f9S294             | 35093114 | 0 | 0   | 0      | C |
| 3 | BICF2P1287964          | 35101211 | 0 | 0   | 0      | A |
| 3 | BICF2G630337705        | 35127520 | C | 0.5 | 0.2857 | A |
| 3 | BICF2G630337711        | 35136498 | G | 0.5 | 0.2857 | A |
| 3 | BICF2G630337726        | 35146536 | G | 0.5 | 0.2857 | A |
| 3 | BICF2G630337736        | 35155934 | 0 | 0   | 0      | A |
| 3 | BICF2G630337747        | 35172960 | A | 0.5 | 0.2857 | G |
| 3 | G239f21S306            | 35210414 | 0 | 0   | 0      | G |
| 3 | TIGRP2P41030_rs8566520 | 35232279 | 0 | 0   | 0      | C |
| 3 | BICF2P1305090          | 35236625 | A | 0   | 0      | G |
| 3 | TIGRP2P41031_rs8831671 | 35251192 | 0 | 0   | 0      | C |
| 3 | BICF2S23036294         | 35264780 | G | 0.5 | 0.2857 | A |
| 3 | BICF2G630106037        | 35288824 | G | 0.5 | 0.2857 | A |
| 3 | BICF2G630106039        | 35304384 | 0 | 0   | 0      | A |
| 3 | G240f23S204            | 35331753 | 0 | 0   | 0      | A |
| 3 | BICF2S22931832         | 35365665 | C | 0.5 | 0.2857 | A |
| 3 | BICF2S22929076         | 35381994 | G | 0.5 | 0.2857 | A |
| 3 | BICF2G630106043        | 35396083 | A | 0   | 0      | G |
| 3 | BICF2P1271063          | 35412405 | 0 | 0   | 0      | G |
| 3 | BICF2P352268           | 35427831 | 0 | 0   | 0      | A |
| 3 | BICF2P1047890          | 35463391 | 0 | 0   | 0      | G |
| 3 | BICF2P191589           | 35488035 | 0 | 0   | 0      | A |
| 3 | BICF2S23212956         | 35490383 | A | 0.5 | 0.2857 | G |
| 3 | G241f17S21             | 35519445 | A | 0.5 | 0.2857 | G |
| 3 | G241f18S277            | 35525943 | A | 0   | 0      | C |
| 3 | BICF2G630106061        | 35554593 | C | 0.5 | 0.2857 | A |
| 3 | BICF2G630106077        | 35561727 | A | 0.5 | 0.2857 | G |
| 3 | BICF2G630106088        | 35565691 | A | 0.5 | 0.2857 | T |
| 3 | BICF2S23423362         | 35590913 | A | 0.5 | 0.2857 | G |
| 3 | BICF2P988675           | 35594223 | A | 0   | 0.4286 | G |
| 3 | BICF2P134520           | 35605537 | G | 0   | 0      | A |
| 3 | BICF2P662888           | 35617909 | G | 0   | 0      | A |
| 3 | BICF2G630106151        | 35633609 | A | 0.5 | 0.2857 | G |
| 3 | BICF2G630106181        | 35645653 | G | 0.5 | 0.2857 | C |
| 3 | BICF2G630106202        | 35656108 | C | 0   | 0      | G |
| 3 | BICF2G630106206        | 35663990 | G | 0   | 0      | A |
| 3 | BICF2S23131953         | 35701884 | G | 0.5 | 0.2    | A |

|   |                        |          |   |     |        |   |
|---|------------------------|----------|---|-----|--------|---|
| 3 | BICF2G630106235        | 35727806 | G | 0   | 0      | A |
| 3 | BICF2G630106237        | 35739739 | A | 0   | 0      | G |
| 3 | BICF2G630106241        | 35742496 | G | 0   | 0      | A |
| 3 | BICF2G630106257        | 35762139 | C | 0.5 | 0.2857 | A |
| 3 | BICF2G630106274        | 35774486 | A | 0.5 | 0.2857 | C |
| 3 | BICF2G630106292        | 35785642 | T | 0   | 0.4286 | A |
| 3 | BICF2G630106304        | 35790057 | G | 0.5 | 0.75   | A |
| 3 | BICF2G630106341        | 35799839 | C | 0   | 0.4286 | A |
| 3 | BICF2G630106356        | 35821899 | C | 0.5 | 0.7143 | A |
| 3 | BICF2G630106360        | 35823798 | A | 0.5 | 0.7143 | G |
| 3 | BICF2G630106385        | 35837137 | A | 0.5 | 0.7143 | C |
| 3 | BICF2G630106390        | 35866782 | G | 1   | 1      | A |
| 3 | BICF2P222705           | 35930933 | A | 0   | 0      | G |
| 3 | G242f20S94             | 35955395 | A | 0   | 0      | G |
| 3 | BICF2G630106397        | 35995620 | A | 0   | 0      | T |
| 3 | BICF2P1496235          | 36040540 | 0 | NA  | 0      | A |
| 3 | BICF2P617130           | 36055823 | 0 | 0   | 0      | G |
| 3 | BICF2G630106399        | 36071787 | A | 0   | 0      | G |
| 3 | BICF2S23327759         | 36076169 | A | 0.5 | 0.2857 | G |
| 3 | BICF2G630106402        | 36123640 | A | 0.5 | 0.2857 | G |
| 3 | BICF2G630106463        | 36150674 | A | 0   | 0.4286 | G |
| 3 | BICF2G630106472        | 36158339 | G | 0.5 | 0.2857 | A |
| 3 | BICF2P523797           | 36175246 | A | 0   | 0      | G |
| 3 | BICF2P1363915          | 36207050 | A | 0.5 | 0.2857 | C |
| 3 | BICF2S23043164         | 36224089 | G | 0   | 0      | A |
| 3 | TIGRP2P41173_rs9234444 | 36236428 | G | 0   | 0      | A |
| 3 | BICF2P46127            | 36236612 | G | 0.5 | 0.2857 | C |
| 3 | TIGRP2P41180_rs9120523 | 36248011 | G | 0.5 | 0.2857 | A |
| 3 | TIGRP2P41189_rs8742795 | 36262561 | G | 0   | 0      | A |
| 3 | BICF2G630106482        | 36282419 | A | 0   | 0      | G |
| 3 | TIGRP2P41195_rs8796158 | 36282971 | A | 0   | 0      | G |
| 3 | BICF2P778347           | 36298018 | C | 0   | 0      | A |
| 3 | BICF2P621551           | 36306450 | C | 0   | 0      | A |
| 3 | BICF2G630106489        | 36328333 | G | 0   | 0      | A |
| 3 | BICF2P889439           | 36330130 | A | 0   | 0      | C |
| 3 | TIGRP2P41218_rs9231423 | 36355057 | G | 0.5 | 0.7143 | A |
| 3 | BICF2G630106551        | 36395966 | A | 0.5 | 0.7143 | T |
| 3 | BICF2G630106552        | 36398534 | G | 0.5 | 0.2857 | A |
| 3 | BICF2G630106563        | 36410575 | C | 0.5 | 0.2857 | G |
| 3 | BICF2G630106591        | 36432197 | G | 0.5 | 0.2857 | A |
| 3 | BICF2G630106597        | 36448642 | G | 0.5 | 0.7143 | A |
| 3 | BICF2P1103001          | 36457203 | 0 | 0   | 0      | A |
| 3 | BICF2G630106615        | 36476262 | A | 0.5 | 0.75   | C |
| 3 | BICF2G630106625        | 36482789 | A | 0.5 | 0.2857 | G |
| 3 | TIGRP2P41233_rs9009061 | 36490051 | A | 0.5 | 0.2857 | G |
| 3 | BICF2P531199           | 36509190 | A | 0   | 0      | G |
| 3 | BICF2P321547           | 36518028 | G | 0   | 0      | A |

|   |                        |          |   |     |        |   |
|---|------------------------|----------|---|-----|--------|---|
| 3 | BICF2P1255508          | 36525745 | A | 0   | 0      | G |
| 3 | BICF2G630106677        | 36530531 | G | 0.5 | 0.2857 | A |
| 3 | BICF2G630106693        | 36542297 | A | 0.5 | 0.25   | C |
| 3 | BICF2P424215           | 36548895 | G | 0.5 | 0.2857 | A |
| 3 | BICF2P153503           | 36565993 | C | 0.5 | 0.2857 | A |
| 3 | TIGRP2P41275_rs8985855 | 36575897 | 0 | 0   | 0      | A |
| 3 | BICF2P362029           | 36584899 | G | 0   | 0.4286 | A |
| 3 | BICF2G630106718        | 36633140 | C | 0   | 0      | A |
| 3 | BICF2G630106741        | 36649317 | C | 0   | 0      | A |
| 3 | BICF2P523410           | 36656068 | A | 0.5 | 0.2857 | G |
| 3 | BICF2G630106760        | 36671485 | G | 0.5 | 0.7143 | A |
| 3 | BICF2P572663           | 36684651 | A | 0   | 0.4167 | G |
| 3 | TIGRP2P41285_rs8544465 | 36685002 | G | 0   | 0.4286 | A |
| 3 | BICF2P448616           | 36709946 | A | 0   | 0.4286 | T |
| 3 | BICF2G630106782        | 36721494 | A | 0   | 0      | G |
| 3 | BICF2G630106786        | 36738612 | A | 0.5 | 0.2857 | G |
| 3 | BICF2G630106787        | 36748479 | A | 0.5 | 0.2857 | C |
| 3 | BICF2G630106790        | 36754360 | A | 0   | 0      | G |
| 3 | BICF2G630106808        | 36788461 | G | 0.5 | 0.2857 | A |
| 3 | TIGRP2P41307_rs8807822 | 36796650 | 0 | 0   | 0      | A |
| 3 | BICF2G630106811        | 36803951 | A | 0.5 | 0.2857 | G |
| 3 | BICF2G630106815        | 36819286 | A | 0   | 0      | G |
| 3 | BICF2G630106817        | 36824525 | A | 0   | 0      | G |
| 3 | BICF2G630106838        | 36848434 | A | 1   | 0.5714 | G |
| 3 | BICF2G630106857        | 36875341 | A | 0   | 0      | C |
| 3 | BICF2P100992           | 36899859 | G | 0   | 0      | A |
| 3 | BICF2G630106876        | 36906261 | G | 0   | 0      | A |
| 3 | BICF2G630106879        | 36924413 | A | 0   | 0      | G |
| 3 | BICF2G630106895        | 36936375 | A | 0.5 | 0.75   | C |
| 3 | BICF2G630106901        | 36943998 | A | 0.5 | 0.7143 | G |
| 3 | BICF2G630106912        | 36956577 | G | 0   | 0      | A |
| 3 | BICF2G630106926        | 36967027 | A | 0   | 0      | G |
| 3 | BICF2P1266151          | 36992234 | G | 0.5 | 0.7143 | A |
| 3 | BICF2G630106957        | 37000220 | A | 0.5 | 0.2857 | G |
| 3 | BICF2G630106970        | 37007850 | A | 0.5 | 0.2857 | G |
| 3 | BICF2S23719407         | 37018649 | G | 0.5 | 0.2857 | A |
| 3 | BICF2P798483           | 37050939 | A | 0   | 0      | G |
| 3 | BICF2P678049           | 37074377 | 0 | 0   | 0      | C |
| 3 | BICF2P1211828          | 37089347 | G | 0.5 | 0.7143 | A |
| 3 | BICF2G630106991        | 37100163 | A | 0   | 0.4286 | G |
| 3 | BICF2S22912703         | 37127801 | G | 0   | 0.4286 | A |
| 3 | BICF2P1398021          | 37138163 | A | 0   | 0.4286 | G |
| 3 | BICF2G630107005        | 37157251 | A | 0   | 0      | G |
| 3 | BICF2G630107019        | 37169571 | A | 0   | 0      | G |
| 3 | BICF2P610095           | 37185647 | G | 0   | 0      | A |
| 3 | BICF2G630107056        | 37192535 | A | 0   | 0      | G |
| 3 | BICF2G630107076        | 37211443 | A | 0   | 0      | G |

|   |                        |          |   |     |        |   |
|---|------------------------|----------|---|-----|--------|---|
| 3 | BICF2G630107090        | 37215049 | A | 0   | 0      | G |
| 3 | BICF2G630107107        | 37228125 | A | 0   | 0      | G |
| 3 | BICF2S23117827         | 37243570 | A | 0   | 0      | G |
| 3 | BICF2G630107136        | 37252772 | A | 0   | 0.4286 | G |
| 3 | BICF2G630107149        | 37262769 | A | 0   | 0.4286 | G |
| 3 | BICF2G630107155        | 37274474 | G | 0   | 0      | A |
| 3 | BICF2G630107179        | 37289259 | A | 0   | 0      | G |
| 3 | BICF2G630107204        | 37297566 | A | 1   | 0.5714 | G |
| 3 | BICF2G630107229        | 37324228 | A | 1   | 0.5714 | C |
| 3 | BICF2P401184           | 37342704 | T | 1   | 0.5714 | A |
| 3 | BICF2G630107237        | 37342973 | A | 0   | 0      | G |
| 3 | TIGRP2P41408_rs9028596 | 37362124 | G | 0   | 0.4286 | A |
| 3 | BICF2G630107255        | 37380260 | G | 0   | 0      | A |
| 3 | BICF2G630107271        | 37397250 | G | 0.5 | 0.2857 | A |
| 3 | BICF2G630107292        | 37409209 | A | 1   | 1      | T |
| 3 | BICF2G630107308        | 37420245 | A | 0   | 0      | G |
| 3 | BICF2G630107310        | 37422499 | A | 0   | 0      | G |
| 3 | BICF2G630107335        | 37433085 | A | 0.5 | 0.7143 | G |
| 3 | BICF2G630107381        | 37446376 | G | 0.5 | 0.2857 | A |
| 3 | BICF2G630107404        | 37459889 | C | 0.5 | 0.2857 | A |
| 3 | BICF2G630107451        | 37478740 | G | 0.5 | 0.2857 | A |
| 3 | BICF2G630107463        | 37500543 | G | 0.5 | 0.2857 | A |
| 3 | BICF2G630107465        | 37504146 | A | 0.5 | 0.2857 | G |
| 3 | BICF2G630107478        | 37535201 | G | 0.5 | 0.2857 | A |
| 3 | BICF2G630107483        | 37539732 | G | 0.5 | 0.25   | A |
| 3 | BICF2G630107488        | 37553938 | A | 0.5 | 0.2857 | G |
| 3 | BICF2G630107505        | 37559875 | A | 0.5 | 0.25   | G |
| 3 | BICF2G630107546        | 37578720 | G | 0.5 | 0.2857 | A |
| 3 | BICF2G630107565        | 37591557 | T | 0   | 0      | A |
| 3 | BICF2G630107566        | 37591793 | G | 0   | 0      | A |
| 3 | BICF2G630107567        | 37591987 | A | 0   | 0      | G |
| 3 | TIGRP2P41458_rs9205281 | 37596153 | A | 0   | 0      | G |
| 3 | BICF2G630107585        | 37607964 | G | 0   | 0      | A |
| 3 | TIGRP2P41466_rs8931554 | 37631618 | A | 0   | 0      | G |
| 3 | BICF2G630107620        | 37640940 | G | 0.5 | 0.2857 | A |
| 3 | BICF2G630107632        | 37655486 | 0 | 0   | 0      | A |
| 3 | BICF2P1393287          | 37675170 | G | 0.5 | 0.2857 | A |
| 3 | BICF2P1283031          | 37685920 | C | 0.5 | 0.2857 | G |
| 3 | BICF2G630107645        | 37691155 | G | 0.5 | 0.7143 | A |
| 3 | BICF2P1401845          | 37701483 | A | 0.5 | 0.7143 | G |
| 3 | TIGRP2P41485_rs9211195 | 37712424 | G | 1   | 1      | A |
| 3 | BICF2P970499           | 37729860 | G | 1   | 0.5714 | A |
| 3 | BICF2P783048           | 37733511 | A | 1   | 0.5714 | C |
| 3 | BICF2G630107672        | 37743285 | A | 0.5 | 0.2857 | G |
| 3 | BICF2G630107676        | 37757211 | G | 0.5 | 0.2857 | A |
| 3 | TIGRP2P41503_rs8599393 | 37766813 | G | 0   | 0      | A |
| 3 | BICF2G630107696        | 37790414 | G | 0   | 0      | A |

|   |                        |          |   |     |        |   |
|---|------------------------|----------|---|-----|--------|---|
| 3 | BICF2G630107714        | 37810019 | 0 | 0   | 0      | A |
| 3 | BICF2G630107717        | 37814785 | G | 0.5 | 0.7143 | A |
| 3 | BICF2G630107726        | 37830447 | 0 | 0   | 0      | G |
| 3 | BICF2G630107747        | 37853748 | G | 0.5 | 0.7143 | A |
| 3 | BICF2G630107767        | 37867683 | G | 0.5 | 0.7143 | A |
| 3 | BICF2G630107782        | 37874247 | 0 | 0   | 0      | G |
| 3 | BICF2S23240792         | 37904421 | A | 0   | 0      | G |
| 3 | BICF2G630107794        | 37915954 | A | 1   | 0.5833 | G |
| 3 | BICF2G630107839        | 37939953 | G | 0   | 0      | A |
| 3 | BICF2G630107853        | 37951617 | C | 1   | 1      | A |
| 3 | BICF2S23415334         | 37957183 | A | 0   | 0      | C |
| 3 | BICF2S23415333         | 37957261 | A | 0   | 0      | T |
| 3 | BICF2G630107873        | 37969837 | 0 | 0   | 0      | A |
| 3 | BICF2G630107882        | 37975988 | 0 | 0   | 0      | G |
| 3 | BICF2G630107902        | 37986469 | A | 0   | 0      | G |
| 3 | BICF2G630107925        | 38005218 | A | 0   | 0.4286 | G |
| 3 | BICF2G630107939        | 38010157 | G | 0   | 0.4286 | A |
| 3 | BICF2P627977           | 38048658 | C | 0   | 0      | G |
| 3 | BICF2G630107948        | 38056896 | G | 1   | 0.5714 | A |
| 3 | BICF2G630107949        | 38065848 | C | 0   | 0.4286 | A |
| 3 | BICF2G630107973        | 38095570 | 0 | 0   | 0      | C |
| 3 | BICF2P299730           | 38107353 | A | 1   | 0.5714 | C |
| 3 | TIGRP2P41556_rs9065281 | 38114688 | C | 0.5 | 0.2857 | G |
| 3 | G243f10S262            | 38126953 | G | 0.5 | 0.2857 | A |
| 3 | G244f4S92              | 38182726 | C | 0   | 0      | A |
| 3 | BICF2S23250460         | 38201963 | C | 0   | 0      | A |
| 3 | BICF2S23410538         | 38206087 | A | 0.5 | 0.25   | G |
| 3 | BICF2G630107989        | 38225516 | 0 | 0   | 0      | A |
| 3 | BICF2P1393860          | 38229297 | A | 0.5 | 0.2857 | G |
| 3 | TIGRP2P41573_rs8939936 | 38247132 | G | 0.5 | 0.2857 | A |
| 3 | BICF2P82045            | 38262610 | 0 | 0   | 0      | G |
| 3 | BICF2P602877           | 38272321 | A | 0   | 0.4286 | G |
| 3 | BICF2G630107990        | 38293172 | 0 | 0   | 0      | G |
| 3 | BICF2P297290           | 38304250 | A | 0.5 | 0.25   | G |
| 3 | BICF2P1141135          | 38311389 | 0 | NA  | 0      | G |
| 3 | BICF2P577483           | 38335649 | A | 0.5 | 0.2857 | G |
| 3 | BICF2P841998           | 38369439 | A | 0.5 | 0.2857 | G |
| 3 | BICF2P290367           | 38394225 | G | 0   | 0.4286 | A |
| 3 | BICF2P72203            | 38417816 | G | 0   | 0.4286 | A |
| 3 | TIGRP2P41596_rs8991090 | 38430822 | A | 0   | 0      | G |
| 3 | BICF2P956418           | 38440620 | G | 0   | 0.4286 | A |
| 3 | BICF2P742793           | 38450206 | A | 0   | 0.4286 | C |
| 3 | BICF2G630107993        | 38475275 | G | 0   | 0      | A |
| 3 | BICF2P451434           | 38504219 | A | 0   | 0      | G |
| 3 | BICF2P590342           | 38514990 | G | 0   | 0.4286 | A |
| 3 | BICF2P1136357          | 38548634 | A | 0   | 0      | G |
| 3 | BICF2G630107998        | 38566665 | 0 | 0   | 0      | G |

|   |                        |          |   |      |        |   |
|---|------------------------|----------|---|------|--------|---|
| 3 | BICF2P1195596          | 38571176 | A | 0    | 0      | C |
| 3 | BICF2P523258           | 38594972 | A | 0    | 0.4167 | G |
| 3 | BICF2P1275525          | 38607091 | A | 0    | 0.4286 | C |
| 3 | BICF2P422395           | 38622849 | A | 0    | 0.4167 | C |
| 3 | BICF2P838358           | 38638661 | C | 0    | 0.4167 | A |
| 3 | BICF2P124476           | 38644961 | C | 0    | 0      | G |
| 3 | BICF2P513550           | 38659699 | G | 0    | 0.4286 | A |
| 3 | TIGRP2P41786_rs8734585 | 38664186 | C | 0    | 0      | A |
| 3 | BICF2P1065968          | 38676703 | A | 0    | 0      | C |
| 3 | BICF2P846328           | 38694017 | C | 0    | 0.4286 | A |
| 3 | BICF2G630108159        | 38699826 | G | 0    | 0.4286 | A |
| 3 | BICF2S23114976         | 38712512 | C | 0    | 0      | A |
| 3 | TIGRP2P41826_rs9173489 | 38727830 | C | 1    | 0.5714 | A |
| 3 | BICF2S23130331         | 38734987 | A | 1    | 0.5714 | G |
| 3 | TIGRP2P41844_rs9040786 | 38747508 | G | 1    | 0.5714 | A |
| 3 | BICF2S23215515         | 38758694 | A | 1    | 0.5714 | G |
| 3 | BICF2S23023683         | 38779091 | G | 1    | 0.5714 | A |
| 3 | BICF2P1236304          | 38796678 | A | 1    | 0.5714 | C |
| 3 | TIGRP2P41862_rs8911839 | 38804687 | G | 1    | 0.5714 | A |
| 3 | G245f4S235             | 38826693 | 0 | 0    | 0      | A |
| 3 | G246f1S175             | 38883774 | 0 | 0    | 0      | C |
| 3 | BICF2P198292           | 38945183 | A | 0    | 0      | G |
| 3 | BICF2P372011           | 38960583 | 0 | 0    | 0      | A |
| 3 | BICF2G630108169        | 38971137 | A | 0    | 0      | G |
| 3 | BICF2P188686           | 38981318 | A | 0.5  | 0.2857 | C |
| 3 | BICF2G630108170        | 38988675 | A | 0    | 0      | G |
| 3 | BICF2G630108171        | 39001207 | C | 0    | 0      | A |
| 3 | TIGRP2P41929_rs9031905 | 39022566 | A | 0    | 0      | G |
| 3 | BICF2P1501362          | 39044801 | 0 | 0    | 0      | A |
| 3 | BICF2G630108179        | 39080205 | T | 0    | 0      | A |
| 3 | BICF2S23034309         | 39093205 | A | 0.75 | 0.5714 | G |
| 3 | TIGRP2P41932_rs8971398 | 39108430 | 0 | 0    | 0      | C |
| 3 | BICF2G630108182        | 39112556 | G | 0    | 0      | A |
| 3 | TIGRP2P41941_rs9189419 | 39185489 | C | 0    | 0      | G |
| 3 | BICF2P579846           | 39202443 | G | 0    | 0      | A |
| 3 | BICF2S2306486          | 39224190 | A | 1    | 1      | G |
| 3 | BICF2P767079           | 39237810 | G | 1    | 1      | A |
| 3 | BICF2G630108204        | 39238509 | A | 1    | 1      | G |
| 3 | BICF2G630108228        | 39270137 | A | 0    | 0      | G |
| 3 | TIGRP2P41949_rs9161169 | 39278037 | A | 1    | 1      | G |
| 3 | BICF2G630108239        | 39286424 | G | 0.25 | 0.4286 | A |
| 3 | BICF2P409381           | 39306656 | A | 0    | 0      | G |
| 3 | TIGRP2P41970_rs8639930 | 39330182 | G | 0    | 0      | A |
| 3 | BICF2G630108333        | 39352127 | A | 0    | 0      | G |
| 3 | BICF2P490864           | 39368647 | G | 0.25 | 0.4286 | A |
| 3 | BICF2S23622684         | 39395861 | G | 0    | 0      | A |
| 3 | BICF2G630108404        | 39424250 | G | 0    | 0      | A |

|   |                        |          |   |      |        |   |
|---|------------------------|----------|---|------|--------|---|
| 3 | BICF2G630108432        | 39443093 | A | 0    | 0      | G |
| 3 | BICF2P865064           | 39456397 | 0 | 0    | 0      | G |
| 3 | BICF2G630108456        | 39457918 | A | 0.25 | 0.4286 | G |
| 3 | BICF2S23148483         | 39469011 | G | 0    | 0      | A |
| 3 | BICF2G630108494        | 39485393 | G | 0.25 | 0.4286 | A |
| 3 | BICF2G630108499        | 39498529 | A | 0.25 | 0.4286 | G |
| 3 | BICF2S23042301         | 39510990 | A | 0    | 0      | G |
| 3 | BICF2P866702           | 39517119 | A | 0    | 0      | G |
| 3 | BICF2P1403833          | 39537009 | A | 0.25 | 0.4286 | G |
| 3 | BICF2G630108543        | 39551089 | A | 0    | 0      | G |
| 3 | BICF2G630108567        | 39572061 | A | 0    | 0      | G |
| 3 | BICF2G630108595        | 39606538 | C | 0.25 | 0.4286 | A |
| 3 | TIGRP2P42039_rs9057010 | 39626589 | A | 0    | 0.4286 | G |
| 3 | TIGRP2P42043_rs9217994 | 39636103 | G | 0.25 | 0.4286 | A |
| 3 | BICF2G630108626        | 39660974 | 0 | 0    | 0      | T |
| 3 | BICF2P1014669          | 39673434 | 0 | 0    | 0      | A |
| 3 | BICF2S23125394         | 39713807 | A | 0.75 | 0.7143 | C |
| 3 | BICF2G630108643        | 39726018 | 0 | 0    | 0      | A |
| 3 | BICF2P1208903          | 39745108 | C | 0.25 | 0.4286 | A |
| 3 | BICF2S22935083         | 39773224 | A | 0.5  | 0.2857 | G |
| 3 | BICF2S23040183         | 39783385 | A | 0    | 0      | G |
| 3 | BICF2G630108652        | 39794979 | 0 | 0    | 0      | C |
| 3 | BICF2P1435332          | 39823849 | 0 | 0    | 0      | A |
| 3 | BICF2G630108655        | 39832658 | C | 0.5  | 0.2857 | A |
| 3 | TIGRP2P42055_rs8921712 | 39836160 | C | 0.25 | 0.2857 | A |
| 3 | BICF2S23452236         | 39880576 | A | 0.5  | 0.2857 | G |
| 3 | BICF2G630108662        | 39899480 | C | 0.25 | 0.4286 | A |
| 3 | BICF2P1002549          | 39912032 | A | 0.25 | 0.2857 | G |
| 3 | BICF2P986838           | 39925309 | A | 0.5  | 0.5    | G |
| 3 | BICF2P205703           | 39956081 | A | 0.25 | 0.4286 | G |
| 3 | BICF2P246215           | 39984687 | A | 0.25 | 0.4286 | G |
| 3 | BICF2P516822           | 39988184 | A | 0    | 0      | G |
| 3 | BICF2G630108671        | 40029208 | A | 0.75 | 0.5714 | G |
| 3 | BICF2P390808           | 40039186 | A | 0    | 0      | G |
| 3 | BICF2G630108676        | 40042604 | A | 0.25 | 0.4286 | G |
| 3 | TIGRP2P42106_rs9061369 | 40045737 | G | 0.75 | 0.5714 | A |
| 3 | BICF2G630108688        | 40057269 | A | 0.25 | 0.4286 | G |
| 3 | TIGRP2P42111_rs9169155 | 40067345 | G | 0.25 | 0.4286 | C |
| 3 | BICF2P186653           | 40073821 | G | 0.75 | 0.5714 | A |
| 3 | TIGRP2P42115_rs8725922 | 40082298 | A | 0.75 | 0.5714 | G |
| 3 | BICF2G630337926        | 40093065 | C | 0.25 | 0.4286 | A |
| 3 | BICF2G630337942        | 40108436 | A | 0.25 | 0.4286 | G |
| 3 | BICF2G630337950        | 40116064 | A | 0    | 0.4167 | G |
| 3 | BICF2P933266           | 40141730 | 0 | 0    | 0      | A |
| 3 | BICF2G630337984        | 40162031 | A | 0    | 0.4286 | G |
| 3 | BICF2G630337991        | 40184776 | A | 0    | 0      | C |
| 3 | BICF2G630338000        | 40197981 | A | 0.75 | 0.5714 | G |



|   |                        |          |   |      |        |   |
|---|------------------------|----------|---|------|--------|---|
| 3 | BICF2G630338007        | 40206565 | G | 0.25 | 0.4286 | A |
| 3 | BICF2G630338024        | 40215817 | A | 0.25 | 0.4286 | G |
| 3 | BICF2G630338066        | 40231650 | A | 0.25 | 0.4286 | G |
| 3 | BICF2G630338087        | 40246132 | G | 0.25 | 0.4286 | A |
| 3 | BICF2G630338113        | 40254259 | A | 0.25 | 0.4286 | G |
| 3 | BICF2P156516           | 40270774 | A | 0    | 0      | G |
| 3 | BICF2G630338153        | 40283467 | A | 0.25 | 0.4286 | G |
| 3 | BICF2G630338168        | 40292838 | C | 0.25 | 0.4286 | A |
| 3 | TIGRP2P42156_rs8720215 | 40292943 | A | 0    | 0      | G |
| 3 | BICF2G630338174        | 40300142 | G | 0    | 0      | A |
| 3 | BICF2G630338208        | 40317985 | C | 0    | 0      | G |
| 3 | BICF2G630338211        | 40321019 | A | 0    | 0      | G |
| 3 | BICF2G630338219        | 40332959 | A | 0.5  | 0.7143 | C |
| 3 | BICF2G630338255        | 40351817 | A | 0.25 | 0.2857 | G |
| 3 | BICF2G630338258        | 40354792 | G | 0.5  | 0.7143 | A |
| 3 | BICF2G630338265        | 40364793 | G | 0.5  | 0.7143 | A |
| 3 | TIGRP2P42176_rs9091206 | 40370979 | A | 0.5  | 0.7143 | G |
| 3 | BICF2G630338273        | 40374442 | G | 0.5  | 0.7143 | C |
| 3 | TIGRP2P42177_rs8411128 | 40380180 | G | 0.25 | 0.2857 | A |
| 3 | BICF2P960472           | 40388090 | G | 0.5  | 0.7143 | A |
| 3 | BICF2G630338286        | 40401187 | 0 | 0    | 0      | C |
| 3 | TIGRP2P42186_rs8880518 | 40421396 | 0 | 0    | 0      | C |
| 3 | G248f45S296            | 40431499 | 0 | 0    | 0      | G |
| 3 | G248f50S177            | 40440818 | T | 0    | 0      | A |
| 3 | BICF2S23336288         | 40466410 | G | 0    | 0      | A |
| 3 | BICF2P1223825          | 40471308 | A | 0.25 | 0.4286 | G |
| 3 | TIGRP2P42195_rs9194739 | 40491743 | A | 0.25 | 0.4286 | G |
| 3 | BICF2P434416           | 40505005 | 0 | 0    | 0      | G |
| 3 | BICF2G630338333        | 40519829 | A | 0.25 | 0.4286 | G |
| 3 | BICF2S23728055         | 40533804 | A | 0.25 | 0.2857 | G |
| 3 | BICF2G630338353        | 40535225 | A | 0.25 | 0.4286 | C |
| 3 | BICF2G630338354        | 40540844 | A | 0    | 0      | G |
| 3 | BICF2P146473           | 40550214 | 0 | 0    | 0      | G |
| 3 | BICF2P1256816          | 40560941 | A | 0.25 | 0.4286 | G |
| 3 | BICF2G630338366        | 40580180 | A | 0    | 0      | G |
| 3 | BICF2P1303594          | 40592066 | A | 0.5  | 0.2857 | G |
| 3 | BICF2G630338372        | 40592980 | A | 0.25 | 0.4286 | G |
| 3 | BICF2P367279           | 40595622 | G | 0.5  | 0.2857 | A |
| 3 | BICF2G630338376        | 40595785 | G | 0.25 | 0.4286 | A |
| 3 | BICF2P1262655          | 40608564 | A | 0.5  | 0.2857 | G |
| 3 | BICF2P293107           | 40614346 | G | 0.25 | 0.2857 | A |
| 3 | BICF2G630338405        | 40623195 | A | 0.75 | 0.7143 | G |
| 3 | BICF2G630338428        | 40633388 | A | 0.25 | 0.4286 | G |
| 3 | BICF2G630338450        | 40647962 | A | 0.75 | 0.7143 | G |
| 3 | BICF2G630338456        | 40652831 | G | 0.25 | 0.4286 | A |
| 3 | BICF2G630338498        | 40671896 | G | 0    | 0      | C |
| 3 | BICF2G630338503        | 40678815 | A | 0    | 0      | G |

|   |                        |          |   |      |        |   |
|---|------------------------|----------|---|------|--------|---|
| 3 | BICF2G630338529        | 40690909 | A | 0.25 | 0.4286 | G |
| 3 | BICF2P643134           | 40704476 | G | 0.25 | 0.4286 | A |
| 3 | BICF2P695312           | 40714135 | G | 0.75 | 0.5714 | A |
| 3 | BICF2G630338548        | 40734830 | A | 0.25 | 0.2857 | G |
| 3 | BICF2G630338565        | 40748674 | G | 0    | 0      | A |
| 3 | BICF2S23754815         | 40762370 | A | 0.25 | 0.2857 | C |
| 3 | BICF2G630338573        | 40769567 | G | 0    | 0      | A |
| 3 | BICF2G630338589        | 40782544 | G | 0.25 | 0.2857 | A |
| 3 | BICF2G630338603        | 40790580 | A | 0.25 | 0.2857 | G |
| 3 | BICF2G630338622        | 40804943 | A | 0    | 0      | C |
| 3 | BICF2G630338650        | 40818313 | C | 0    | 0      | A |
| 3 | BICF2P1225475          | 40834327 | 0 | 0    | 0      | G |
| 3 | BICF2G630338653        | 40844380 | A | 0    | 0      | G |
| 3 | TIGRP2P42263_rs9208556 | 40858976 | G | 0    | 0      | A |
| 3 | BICF2G630338654        | 40864626 | G | 0    | 0      | A |
| 3 | BICF2P156497           | 40873735 | G | 0    | 0      | A |
| 3 | BICF2G630338666        | 40892957 | A | 0    | 0      | G |
| 3 | BICF2S23445965         | 40901963 | A | 0.25 | 0.4286 | C |
| 3 | BICF2G630338674        | 40914488 | A | 0.5  | 0.2857 | G |
| 3 | BICF2P1149544          | 40921015 | A | 0.5  | 0.2857 | G |
| 3 | BICF2P484635           | 40934388 | 0 | 0    | 0      | G |
| 3 | BICF2S22913970         | 40961557 | G | 0    | 0      | A |
| 3 | BICF2G630338700        | 40967788 | A | 0.5  | 0.7143 | G |
| 3 | BICF2G630338704        | 40988917 | C | 0.5  | 0.7143 | G |
| 3 | BICF2P1496229          | 41013156 | A | 0    | 0      | C |
| 3 | BICF2P275415           | 41028069 | C | 0    | 0      | G |
| 3 | BICF2G630338718        | 41040267 | C | 0.25 | 0.4286 | A |
| 3 | BICF2G630338738        | 41045170 | G | 0.25 | 0.4286 | A |
| 3 | BICF2P684982           | 41048247 | A | 0.25 | 0.4286 | G |
| 3 | BICF2G630338747        | 41063353 | G | 0.25 | 0.4286 | A |
| 3 | BICF2G630338778        | 41078493 | G | 0.25 | 0.4286 | A |
| 3 | BICF2G630338844        | 41112873 | A | 0.25 | 0.4286 | G |
| 3 | BICF2G630338855        | 41132703 | C | 0.25 | 0.4286 | A |
| 3 | BICF2S23226602         | 41157915 | A | 0    | 0      | G |
| 3 | BICF2G630338866        | 41166759 | G | 0.75 | 0.5714 | A |
| 3 | BICF2P1279830          | 41180995 | 0 | 0    | 0      | A |
| 3 | BICF2S23418256         | 41191394 | A | 0    | 0      | G |
| 3 | BICF2P320286           | 41206830 | 0 | 0    | 0      | G |
| 3 | BICF2G630338875        | 41219385 | A | 0.25 | 0.4286 | G |
| 3 | BICF2P1050747          | 41227703 | G | 0    | 0      | A |
| 3 | BICF2S23429322         | 41240470 | G | 1    | 1      | A |
| 3 | BICF2G630338879        | 41251838 | A | 0    | 0      | C |
| 3 | BICF2G630338891        | 41265309 | G | 0    | 0      | A |
| 3 | BICF2G630338894        | 41273930 | G | 0    | 0      | A |
| 3 | BICF2G630338918        | 41285363 | A | 0    | 0      | G |
| 3 | BICF2G630338927        | 41303025 | A | 0    | 0      | C |
| 3 | BICF2G630338928        | 41309053 | A | 0.25 | 0.4286 | G |

|   |                        |          |   |      |        |   |
|---|------------------------|----------|---|------|--------|---|
| 3 | BICF2P555557           | 41313663 | A | 0.25 | 0.4286 | G |
| 3 | BICF2G630338935        | 41324341 | A | 0.25 | 0.4286 | G |
| 3 | BICF2G630338965        | 41341678 | A | 0.25 | 0.4286 | C |
| 3 | BICF2G630338966        | 41342635 | G | 0    | 0.4167 | A |
| 3 | BICF2G630338996        | 41362935 | A | 0    | 0      | C |
| 3 | TIGRP2P42328_rs8767171 | 41367554 | C | 0    | 0      | A |
| 3 | TIGRP2P42333_rs9149913 | 41377483 | A | 0    | 0      | G |
| 3 | BICF2G630339022        | 41393709 | 0 | 0    | 0      | A |
| 3 | BICF2P496778           | 41406123 | 0 | 0    | 0      | A |
| 3 | BICF2P731550           | 41425748 | 0 | 0    | 0      | G |
| 3 | BICF2G630339024        | 41460029 | 0 | 0    | 0      | A |
| 3 | BICF2S23012614         | 41508558 | A | 0    | 0      | G |
| 3 | BICF2G630339037        | 41529556 | G | 1    | 1      | A |
| 3 | BICF2S23162322         | 41545262 | C | 0.5  | 0.2857 | G |
| 3 | BICF2G630339042        | 41550594 | G | 1    | 1      | A |
| 3 | BICF2G630339050        | 41561567 | G | 0    | 0      | A |
| 3 | TIGRP2P42352_rs8560797 | 41573909 | G | 0.5  | 0.2857 | A |
| 3 | BICF2G630339062        | 41593312 | C | 0    | 0      | A |
| 3 | BICF2G630339064        | 41598400 | G | 0    | 0      | A |
| 3 | BICF2G630339071        | 41608370 | G | 0.5  | 0.7143 | A |
| 3 | BICF2P231278           | 41619978 | 0 | 0    | 0      | A |
| 3 | BICF2G630339085        | 41630484 | G | 0    | 0      | A |
| 3 | BICF2G630339094        | 41653986 | A | 0    | 0      | G |
| 3 | BICF2S23134459         | 41655316 | G | 0.5  | 0.2857 | A |
| 3 | BICF2G630339101        | 41661203 | C | 0.5  | 0.7143 | G |
| 3 | BICF2G630339108        | 41668800 | A | 0    | 0      | G |
| 3 | BICF2G630339135        | 41693486 | A | 0.5  | 0.25   | C |
| 3 | TIGRP2P42363_rs9061832 | 41706030 | C | NA   | 0.2    | A |
| 3 | BICF2P1260907          | 41725230 | A | 0.5  | 0.7143 | G |
| 3 | BICF2S236866           | 41741366 | 0 | 0    | 0      | A |
| 3 | BICF2G630339144        | 41750695 | A | 0.5  | 0.7143 | C |
| 3 | BICF2G630339151        | 41757369 | A | 0    | 0      | G |
| 3 | BICF2G630339162        | 41768055 | A | 0.5  | 0.7143 | G |
| 3 | BICF2P628739           | 41780324 | A | 0    | 0      | G |
| 3 | BICF2P1398956          | 41808103 | G | 0.5  | 0.2857 | A |
| 3 | TIGRP2P42395_rs8869559 | 41815676 | A | 0.5  | 0.2857 | G |
| 3 | TIGRP2P42402_rs8997601 | 41831647 | A | 0    | 0      | G |
| 3 | BICF2G630339210        | 41838029 | A | 0    | 0      | T |
| 3 | BICF2P994362           | 41853572 | G | 0    | 0      | A |
| 3 | BICF2S23754010         | 41870926 | A | 0    | 0      | G |
| 3 | BICF2P1216097          | 41886981 | A | 0    | 0      | G |
| 3 | BICF2G630339226        | 41912134 | A | 0    | 0      | G |
| 3 | BICF2S22946127         | 41918728 | 0 | 0    | 0      | G |
| 3 | BICF2S23054523         | 41929703 | G | 0    | 0      | A |
| 3 | BICF2P154097           | 41941924 | 0 | 0    | 0      | C |
| 3 | BICF2G630339236        | 41961282 | A | 0.5  | 0.2857 | G |
| 3 | BICF2G630339239        | 41964494 | T | 0.75 | 0.5714 | A |

|   |                        |          |   |      |        |   |
|---|------------------------|----------|---|------|--------|---|
| 3 | BICF2S23721391         | 41975782 | G | 0.25 | 0.2857 | A |
| 3 | BICF2G630339250        | 42000675 | G | 0    | 0      | A |
| 3 | BICF2G630339255        | 42010056 | A | 0.75 | 0.5714 | G |
| 3 | BICF2G630339261        | 42028323 | G | 0.75 | 0.5714 | A |
| 3 | BICF2G630339270        | 42039748 | G | 0    | 0      | A |
| 3 | BICF2G630339274        | 42044033 | A | 1    | 1      | G |
| 3 | BICF2G630339296        | 42088959 | G | 1    | 1      | A |
| 3 | BICF2G630339298        | 42092803 | A | 0.5  | 0.2857 | G |
| 3 | TIGRP2P42432_rs8463557 | 42115002 | C | 0.25 | 0.2857 | G |
| 3 | TIGRP2P42442_rs9189133 | 42138759 | A | 0.5  | 0.2857 | G |
| 3 | TIGRP2P42449_rs9216481 | 42158410 | C | 0.5  | 0.2857 | A |
| 3 | BICF2P1247015          | 42169931 | A | 0.75 | 0.5714 | G |
| 3 | BICF2P713044           | 42177325 | A | 0.75 | 0.5714 | G |
| 3 | TIGRP2P42463_rs9073274 | 42181548 | A | 0.75 | 0.5714 | C |
| 3 | BICF2P429071           | 42182140 | G | 0.75 | 0.5714 | A |
| 3 | BICF2P1453717          | 42194378 | 0 | 0    | 0      | A |
| 3 | BICF2G630339307        | 42207073 | A | 0.75 | 0.5714 | G |
| 3 | BICF2G630339317        | 42219839 | A | 0.25 | 0.4286 | C |
| 3 | BICF2P69735            | 42229118 | G | 0    | 0      | A |
| 3 | TIGRP2P42480_rs9075195 | 42242921 | G | 0    | 0      | A |
| 3 | TIGRP2P42481_rs9021241 | 42253414 | G | 0    | 0      | A |
| 3 | BICF2P1239215          | 42269704 | A | 0    | 0      | G |
| 3 | BICF2G630339329        | 42282053 | A | 0    | 0      | G |
| 3 | BICF2G630339373        | 42307680 | A | 0.25 | 0.4286 | C |
| 3 | BICF2G630339376        | 42316963 | C | 0.25 | 0.4286 | A |
| 3 | BICF2P555818           | 42339876 | A | 0.75 | 0.5714 | G |
| 3 | TIGRP2P42493_rs8890264 | 42348458 | G | 0    | 0      | A |
| 3 | TIGRP2P42494_rs8890947 | 42358288 | A | 0    | 0      | G |
| 3 | BICF2S22936448         | 42368395 | C | 0.75 | 0.5714 | G |
| 3 | BICF2S2369266          | 42385522 | G | 0    | 0      | A |
| 3 | BICF2G630339389        | 42395352 | A | 0.5  | 0.2857 | C |
| 3 | BICF2G630339399        | 42404899 | A | 0.25 | 0.4286 | G |
| 3 | BICF2G630339410        | 42424902 | C | 0    | 0      | A |
| 3 | BICF2G630339421        | 42438275 | A | 0    | 0      | G |
| 3 | BICF2G630339425        | 42449579 | A | 0.25 | 0.2857 | C |
| 3 | BICF2P157577           | 42458005 | A | 0.25 | 0.2857 | G |
| 3 | BICF2P560851           | 42479513 | A | 0.25 | 0.2857 | G |
| 3 | BICF2G630339433        | 42492623 | G | 0.25 | 0.4286 | A |
| 3 | BICF2G630339440        | 42507351 | A | 0    | 0      | G |
| 3 | BICF2P1335812          | 42516120 | A | 0    | 0      | G |
| 3 | BICF2P689707           | 42531555 | C | 0.5  | 0.7143 | A |
| 3 | BICF2P265130           | 42548827 | A | 1    | 1      | G |
| 3 | BICF2G630339473        | 42560493 | G | 1    | 1      | A |
| 3 | BICF2G630339493        | 42565168 | A | 1    | 1      | G |
| 3 | BICF2G630339499        | 42577812 | A | 0.75 | 0.7143 | C |
| 3 | BICF2P165412           | 42586522 | A | 0.25 | 0.2857 | G |
| 3 | TIGRP2P42524_rs8603007 | 42600219 | G | 0.25 | 0.2857 | A |

|   |                        |          |   |      |        |   |
|---|------------------------|----------|---|------|--------|---|
| 3 | TIGRP2P42528_rs8728661 | 42611622 | G | 0    | 0      | A |
| 3 | BICF2G630339516        | 42626358 | A | 0.25 | 0.2857 | C |
| 3 | BICF2G630339525        | 42637201 | G | 0.25 | 0.4286 | A |
| 3 | BICF2P171546           | 42653266 | C | 0.25 | 0.4286 | A |
| 3 | BICF2G630339542        | 42659118 | A | 0.25 | 0.4286 | G |
| 3 | BICF2G630339547        | 42666802 | G | 0.25 | 0.4286 | A |
| 3 | BICF2G630339574        | 42685261 | A | 0.25 | 0.4286 | G |
| 3 | BICF2G630339584        | 42694477 | G | 0.25 | 0.4286 | A |
| 3 | BICF2P178696           | 42710085 | G | 0.75 | 0.7143 | A |
| 3 | TIGRP2P42536_rs9209225 | 42714862 | A | 0.75 | 0.7143 | G |
| 3 | BICF2S23541261         | 42722922 | A | 0.75 | 0.7143 | C |
| 3 | TIGRP2P42545_rs8835456 | 42749134 | A | 0.75 | 0.7143 | G |
| 3 | BICF2P897067           | 42761487 | A | 0    | 0      | G |
| 3 | BICF2G630339599        | 42773874 | 0 | 0    | 0      | A |
| 3 | TIGRP2P42557_rs8860550 | 42784668 | A | 0.25 | 0.2857 | G |
| 3 | TIGRP2P42559_rs8963357 | 42793607 | G | 0.25 | 0.2857 | A |
| 3 | BICF2G630339616        | 42824809 | G | 0.75 | 0.5714 | A |
| 3 | BICF2G630339621        | 42829136 | G | 0.5  | 0.2857 | A |
| 3 | TIGRP2P42564_rs8919420 | 42847774 | G | 0.5  | 0.2857 | A |
| 3 | BICF2P914100           | 42862621 | G | 0.25 | 0.25   | A |
| 3 | TIGRP2P42585_rs9169895 | 42877793 | A | 0.25 | 0.2857 | G |
| 3 | BICF2P188107           | 42878112 | G | 0.25 | 0.2857 | A |
| 3 | TIGRP2P42594_rs8943446 | 42884280 | A | 0    | 0      | G |
| 3 | BICF2P1302336          | 42896967 | A | 0    | 0      | G |
| 3 | BICF2P32874            | 42923585 | A | 0.25 | 0.4286 | G |
| 3 | BICF2P559541           | 42932098 | G | 0.25 | 0.4286 | A |
| 3 | BICF2G630339669        | 42943284 | A | 0    | 0      | G |
| 3 | BICF2G630339684        | 42953287 | A | 0    | 0      | T |
| 3 | BICF2G630339707        | 42969912 | G | 0    | 0      | A |
| 3 | BICF2G630339713        | 42976711 | G | 0    | 0      | A |
| 3 | BICF2P801184           | 42987507 | 0 | 0    | 0      | G |
| 3 | BICF2S23319506         | 43006057 | A | 0    | 0      | G |
| 3 | BICF2G630339728        | 43015006 | 0 | 0    | 0      | A |
| 3 | BICF2P794022           | 43022894 | A | 0.25 | 0.2857 | G |
| 3 | BICF2P387754           | 43067111 | 0 | 0    | 0      | A |
| 3 | BICF2P387756           | 43067697 | A | 0    | 0      | G |
| 3 | BICF2G630339732        | 43079314 | G | 0.25 | 0.2857 | A |
| 3 | BICF2G630339738        | 43092398 | C | 0.25 | 0.2857 | A |
| 3 | BICF2P937567           | 43094389 | A | 0.25 | 0.2857 | C |
| 3 | BICF2S23213482         | 43111383 | A | 0.25 | 0.2857 | G |
| 3 | BICF2G630339764        | 43114029 | A | 0    | 0      | G |
| 3 | BICF2G630339776        | 43128915 | G | 0.25 | 0.2857 | A |
| 3 | BICF2G630339788        | 43142694 | G | 0.25 | 0.2857 | A |
| 3 | BICF2G630339794        | 43145641 | T | 0.25 | 0.2857 | A |
| 3 | BICF2G630339796        | 43145699 | A | 0.25 | 0.2857 | G |
| 3 | BICF2G630339800        | 43150128 | A | 0.25 | 0.2857 | G |
| 3 | BICF2G630339806        | 43159521 | A | 0.25 | 0.2857 | G |

|   |                        |          |   |      |        |   |
|---|------------------------|----------|---|------|--------|---|
| 3 | G249f24S70             | 43195229 | G | 0    | 0      | A |
| 3 | BICF2P646966           | 43216511 | 0 | 0    | 0      | A |
| 3 | BICF2G630339813        | 43220000 | 0 | 0    | 0      | G |
| 3 | BICF2P1334017          | 43239116 | 0 | 0    | 0      | G |
| 3 | BICF2P657914           | 43257377 | 0 | 0    | 0      | G |
| 3 | BICF2S22937971         | 43265238 | G | 0    | 0      | A |
| 3 | BICF2G630339821        | 43274788 | 0 | 0    | 0      | A |
| 3 | BICF2G630339826        | 43292397 | 0 | 0    | 0      | G |
| 3 | BICF2P1146176          | 43305999 | 0 | 0    | 0      | A |
| 3 | BICF2G630339828        | 43313899 | 0 | 0    | 0      | T |
| 3 | TIGRP2P42614_rs9211918 | 43340039 | A | 0.25 | 0.2857 | G |
| 3 | BICF2P329270           | 43355717 | A | 0    | 0      | G |
| 3 | BICF2P909751           | 43368377 | A | 0    | 0      | G |
| 3 | TIGRP2P42618_rs8993407 | 43384704 | 0 | 0    | 0      | A |
| 3 | BICF2P247110           | 43397621 | A | 0.75 | 0.5833 | G |
| 3 | BICF2G630339832        | 43409020 | G | 0    | 0      | A |
| 3 | BICF2G630339833        | 43414411 | A | 0    | 0      | G |
| 3 | TIGRP2P42626_rs8800295 | 43427329 | C | 0.75 | 0.5714 | A |
| 3 | BICF2P58843            | 43445996 | A | 1    | 1      | C |
| 3 | BICF2P122621           | 43449278 | 0 | 0    | 0      | G |
| 3 | BICF2P1040272          | 43464965 | G | 0    | 0      | A |
| 3 | BICF2G630339843        | 43472851 | 0 | 0    | 0      | G |
| 3 | BICF2G630339850        | 43489192 | G | 0    | 0      | A |
| 3 | BICF2P898384           | 43499533 | A | 0.5  | 0.2857 | G |
| 3 | BICF2S23230642         | 43522701 | A | 0.25 | 0.4286 | G |
| 3 | BICF2S23622321         | 43552387 | G | 0    | 0      | A |
| 3 | BICF2S23312930         | 43562629 | 0 | 0    | 0      | G |
| 3 | BICF2S23415185         | 43576160 | A | 0    | 0      | G |
| 3 | BICF2P1175015          | 43587434 | 0 | 0    | 0      | A |
| 3 | BICF2G630339863        | 43597477 | A | 0.5  | 0.2857 | G |
| 3 | BICF2G630339865        | 43599336 | A | 0.5  | 0.7143 | C |
| 3 | BICF2G630339869        | 43605612 | G | 0.5  | 0.7143 | A |
| 3 | BICF2P1349863          | 43635120 | 0 | 0    | 0      | A |
| 3 | BICF2P864209           | 43651650 | G | 0.25 | 0.2857 | A |
| 3 | BICF2G630339874        | 43665475 | 0 | 0    | 0      | G |
| 3 | BICF2P144834           | 43670112 | 0 | 0    | 0      | C |
| 3 | BICF2P1352759          | 43688434 | A | 0.75 | 0.7143 | G |
| 3 | TIGRP2P42645_rs8875823 | 43694486 | A | 0.75 | 0.7143 | G |
| 3 | BICF2P873434           | 43702781 | G | 0.75 | 0.7143 | A |
| 3 | BICF2P201136           | 43715937 | A | 1    | 1      | G |
| 3 | BICF2G630339876        | 43723923 | 0 | 0    | 0      | G |
| 3 | TIGRP2P42660_rs8690947 | 43729382 | G | 0    | 0      | A |
| 3 | BICF2P992772           | 43754418 | A | 0    | 0      | G |
| 3 | BICF2S23628037         | 43765344 | A | 0.5  | 0.2857 | G |
| 3 | BICF2P963958           | 43781636 | A | 0.25 | 0.2857 | C |
| 3 | BICF2G630339885        | 43793652 | G | 0.25 | 0.2857 | A |
| 3 | TIGRP2P42684_rs9188380 | 43803902 | A | 0.5  | 0.2857 | C |

|   |                        |          |   |      |        |   |
|---|------------------------|----------|---|------|--------|---|
| 3 | BICF2G630339923        | 43816982 | A | 0.5  | 0.2857 | G |
| 3 | BICF2G630339930        | 43845408 | 0 | 0    | 0      | G |
| 3 | BICF2G630339931        | 43871645 | 0 | 0    | 0      | A |
| 3 | BICF2G630339932        | 43890044 | 0 | 0    | 0      | A |
| 3 | BICF2S22943910         | 43918353 | 0 | 0    | 0      | A |
| 3 | BICF2P547807           | 43929331 | 0 | 0    | 0      | A |
| 3 | G250f27S115            | 43950009 | A | 0    | 0      | C |
| 3 | BICF2P996261           | 43977219 | 0 | 0    | 0      | G |
| 3 | BICF2P127492           | 43991179 | 0 | 0    | 0      | G |
| 3 | BICF2G630339936        | 44003971 | A | 0.75 | 0.5714 | G |
| 3 | BICF2P720168           | 44021698 | 0 | 0    | 0      | A |
| 3 | BICF2P1103664          | 44032340 | 0 | 0    | 0      | A |
| 3 | BICF2G630339939        | 44033819 | C | 0    | 0      | A |
| 3 | BICF2P228369           | 44045545 | A | 0    | 0      | G |
| 3 | TIGRP2P42722_rs9206774 | 44061336 | A | 0.5  | 0.2857 | G |
| 3 | TIGRP2P42726_rs9145375 | 44074040 | A | 0.5  | 0.2857 | C |
| 3 | BICF2P1378441          | 44085302 | A | 0    | 0      | G |
| 3 | BICF2P279364           | 44099822 | A | 0.5  | 0.2857 | G |
| 3 | BICF2P936560           | 44103178 | G | 0.5  | 0.2857 | A |
| 3 | BICF2P233888           | 44114250 | G | 0.5  | 0.2857 | A |
| 3 | BICF2S22941908         | 44126215 | G | 0    | 0      | A |
| 3 | BICF2S22938870         | 44147699 | G | 0.25 | 0.2857 | A |
| 3 | BICF2G630339954        | 44154320 | A | 0.25 | 0.2857 | G |
| 3 | BICF2P1018678          | 44170507 | A | 0.5  | 0.2857 | G |
| 3 | BICF2P1018675          | 44171004 | A | 0.25 | 0.2857 | G |
| 3 | BICF2P1192466          | 44175898 | G | 0.25 | 0.2857 | A |
| 3 | BICF2G630339989        | 44191164 | G | 0.5  | 0.2857 | A |
| 3 | BICF2G630339993        | 44194848 | A | 0.5  | 0.2857 | G |
| 3 | BICF2G630340008        | 44210640 | A | 0.25 | 0.2857 | G |
| 3 | BICF2P393510           | 44239362 | G | 0.5  | 0.2857 | A |
| 3 | BICF2G630340017        | 44242160 | C | 0    | 0      | G |
| 3 | BICF2P841996           | 44254817 | G | 0.5  | 0.2857 | A |
| 3 | TIGRP2P42785_rs9076130 | 44277025 | A | 0.5  | 0.2857 | G |
| 3 | BICF2G630340031        | 44292469 | A | 0.25 | 0.2857 | C |
| 3 | BICF2G630340036        | 44304812 | C | 0.25 | 0.4286 | A |
| 3 | BICF2G630340037        | 44317100 | G | 0    | 0      | A |
| 3 | BICF2G630340041        | 44332123 | A | 0.25 | 0.2857 | C |
| 3 | BICF2S229813           | 44340149 | A | 0    | 0      | G |
| 3 | BICF2P161192           | 44358425 | A | 0.75 | 0.5714 | G |
| 3 | BICF2P800307           | 44367451 | A | 0.5  | 0.2857 | G |
| 3 | TIGRP2P42808_rs8796316 | 44382053 | A | 0.25 | 0.2857 | G |
| 3 | BICF2P716362           | 44398830 | C | 0    | 0      | A |
| 3 | BICF2S23240123         | 44405470 | A | 0.5  | 0.2857 | G |
| 3 | TIGRP2P42817_rs8967382 | 44423299 | A | 0.5  | 0.2857 | C |
| 3 | TIGRP2P42818_rs8618871 | 44428428 | 0 | 0    | 0      | G |
| 3 | TIGRP2P42825_rs8720568 | 44445705 | A | 0.5  | 0.2857 | C |
| 3 | TIGRP2P42827_rs9154080 | 44448182 | A | 0.25 | 0.4286 | G |

|   |                        |          |   |      |        |   |
|---|------------------------|----------|---|------|--------|---|
| 3 | TIGRP2P42832_rs8905541 | 44469087 | 0 | 0    | 0      | C |
| 3 | BICF2P1417609          | 44481999 | G | 0.75 | 0.5714 | A |
| 3 | BICF2P1417611          | 44483632 | G | 0.75 | 0.5714 | A |
| 3 | TIGRP2P42849_rs9217030 | 44495910 | A | 0.75 | 0.5714 | G |
| 3 | BICF2P1036426          | 44505514 | C | 0.75 | 0.5714 | G |
| 3 | BICF2G630340058        | 44519852 | G | 0.25 | 0.4286 | A |
| 3 | BICF2G630340077        | 44543893 | A | 0.25 | 0.2857 | G |
| 3 | BICF2G630340083        | 44551778 | A | 0    | 0      | T |
| 3 | BICF2G630340096        | 44563408 | A | 0    | 0      | G |
| 3 | BICF2G630340121        | 44592607 | C | 0    | 0      | A |
| 3 | BICF2P183331           | 44606365 | 0 | 0    | 0      | G |
| 3 | BICF2G630340127        | 44615782 | A | 0    | 0      | G |
| 3 | BICF2G630340128        | 44622942 | A | 0    | 0      | G |
| 3 | BICF2G630340133        | 44639029 | A | 0    | 0      | G |
| 3 | BICF2S23726155         | 44648858 | G | 0.25 | 0.2857 | A |
| 3 | TIGRP2P42865_rs9138451 | 44660125 | A | 0    | 0      | C |
| 3 | BICF2G630340139        | 44667313 | A | 0    | 0      | G |
| 3 | BICF2G630340148        | 44683097 | G | 0    | 0      | A |
| 3 | BICF2G630340151        | 44689464 | A | 0    | 0      | G |
| 3 | TIGRP2P42867_rs8516972 | 44708539 | G | 0    | 0      | A |
| 3 | BICF2G630340164        | 44713043 | G | 0    | 0      | A |
| 3 | BICF2G630340171        | 44721125 | A | 0    | 0      | G |
| 3 | BICF2G630340175        | 44733126 | A | 0    | 0      | C |
| 3 | BICF2G630340177        | 44735078 | C | 0    | 0      | A |
| 3 | BICF2G630340182        | 44750048 | C | 0    | 0      | A |
| 3 | BICF2P889260           | 44768592 | C | 0    | 0      | A |
| 3 | BICF2G630340191        | 44780948 | G | 0    | 0      | A |
| 3 | BICF2G630340192        | 44782059 | G | 0    | 0      | A |
| 3 | BICF2G630340196        | 44797967 | G | 0    | 0      | A |
| 3 | BICF2G630340201        | 44821173 | A | 0    | 0      | G |
| 3 | BICF2G630340206        | 44827161 | C | 0    | 0      | A |
| 3 | BICF2G630340217        | 44846605 | A | 0    | 0      | G |
| 3 | TIGRP2P42872_rs8820868 | 44857590 | C | 0    | 0      | A |
| 3 | BICF2G630340220        | 44864340 | A | 0    | 0      | C |
| 3 | TIGRP2P42876_rs8565984 | 44884277 | G | 0.75 | 0.7143 | A |
| 3 | BICF2P618831           | 44886722 | 0 | 0    | 0      | G |
| 3 | TIGRP2P42879_rs9048996 | 44899291 | G | 0.75 | 0.7143 | A |
| 3 | BICF2G630340222        | 44915687 | A | 0.25 | 0.2857 | G |
| 3 | BICF2S23144494         | 44929188 | G | 0.25 | 0.2857 | A |
| 3 | TIGRP2P42888_rs9083332 | 44939293 | 0 | 0    | 0      | G |
| 3 | BICF2P1130044          | 44952918 | 0 | 0    | 0      | G |
| 3 | BICF2G630340224        | 44959747 | A | 0    | 0      | G |
| 3 | BICF2G630340234        | 44966808 | G | 0.25 | 0.2857 | A |
| 3 | BICF2P1197185          | 44984911 | A | 0    | 0      | G |
| 3 | BICF2P415419           | 44994501 | A | 0.25 | 0.2857 | G |
| 3 | BICF2G630340256        | 45007105 | A | 0    | 0      | G |
| 3 | BICF2P1415923          | 45026840 | A | 0.75 | 0.7143 | G |



|   |                        |          |   |      |        |   |
|---|------------------------|----------|---|------|--------|---|
| 3 | BICF2G630340269        | 45026946 | 0 | 0    | 0      | G |
| 3 | BICF2G630340273        | 45038064 | G | 0.75 | 0.7143 | A |
| 3 | TIGRP2P42917_rs8640918 | 45053192 | 0 | 0    | 0      | G |
| 3 | BICF2P524350           | 45064899 | G | 0.75 | 0.7143 | A |
| 3 | BICF2P1213979          | 45075558 | G | 0.75 | 0.7143 | A |
| 3 | BICF2P24040            | 45088775 | A | 1    | 0.7143 | G |
| 3 | TIGRP2P42919_rs8861158 | 45108681 | G | 0    | 0      | A |
| 3 | BICF2P65875            | 45117124 | G | 0    | 0      | A |
| 3 | BICF2G630340305        | 45134667 | A | 0.25 | 0.2857 | G |
| 3 | BICF2G630340312        | 45147303 | A | 0.25 | 0.2857 | G |
| 3 | BICF2G630340316        | 45150218 | A | 0.25 | 0.2    | G |
| 3 | BICF2G630340334        | 45161257 | G | 0    | 0      | A |
| 3 | BICF2G630340347        | 45177848 | G | 0.75 | 0.7143 | A |
| 3 | BICF2S23437438         | 45185965 | 0 | 0    | 0      | G |
| 3 | BICF2G630340360        | 45201605 | A | 0.75 | 0.7143 | C |
| 3 | BICF2G630340367        | 45209848 | A | 0    | 0      | C |
| 3 | BICF2G630340375        | 45219756 | A | 0    | 0      | G |
| 3 | BICF2G630340390        | 45231951 | A | 0    | 0      | G |
| 3 | BICF2G630340420        | 45251647 | A | 0    | 0      | G |
| 3 | BICF2G630340423        | 45252005 | A | 0    | 0      | C |
| 3 | BICF2G630340424        | 45252198 | G | 0    | 0      | C |
| 3 | BICF2G630340425        | 45255398 | G | 0    | 0      | A |
| 3 | BICF2G630340429        | 45286264 | A | 0    | 0      | G |
| 3 | BICF2G630340454        | 45308695 | A | 0    | 0      | G |
| 3 | BICF2G630340458        | 45315009 | A | 0    | 0      | G |
| 3 | BICF2G630340488        | 45341118 | G | 0    | 0      | C |
| 3 | BICF2G630340501        | 45344845 | A | 0    | 0      | G |
| 3 | BICF2G630340542        | 45356122 | G | 0    | 0      | A |
| 3 | BICF2G630340566        | 45368222 | G | 0    | 0      | A |
| 3 | BICF2G630340591        | 45383843 | C | 0    | 0      | A |
| 3 | BICF2G630340595        | 45391606 | G | 1    | 0.7143 | A |
| 3 | BICF2G630340601        | 45406561 | A | 0.75 | 0.75   | G |
| 3 | BICF2P469832           | 45410993 | A | 0    | 0      | G |
| 3 | BICF2G630340609        | 45422732 | C | 0    | 0      | A |
| 3 | BICF2G630340624        | 45435818 | C | 0    | 0      | A |
| 3 | BICF2G630340647        | 45441892 | A | 0    | 0      | G |
| 3 | BICF2G630340654        | 45455674 | G | 0    | 0      | A |
| 3 | BICF2G630340666        | 45461295 | A | 1    | 1      | C |
| 3 | BICF2P1003371          | 45481237 | A | 0    | 0      | G |
| 3 | BICF2G630340679        | 45483408 | G | 0.75 | 0.7143 | A |
| 3 | BICF2G630340701        | 45487806 | A | 0.75 | 0.7143 | G |
| 3 | BICF2G630340720        | 45497515 | G | 0.75 | 0.7143 | A |
| 3 | BICF2G630340731        | 45507463 | T | 0.75 | 0.7143 | A |
| 3 | BICF2G630340744        | 45523141 | A | NA   | 0.5    | C |
| 3 | BICF2S23324122         | 45536639 | A | 0    | 0      | G |
| 3 | BICF2S2338165          | 45545376 | A | 0    | 0      | C |
| 3 | BICF2P1182264          | 45574148 | C | 0    | 0      | G |

|   |                        |          |   |      |        |   |
|---|------------------------|----------|---|------|--------|---|
| 3 | BICF2S23016977         | 45594832 | A | 0.75 | 0.7143 | G |
| 3 | TIGRP2P42942_rs8664578 | 45643432 | 0 | 0    | 0      | C |
| 3 | BICF2S23635003         | 45657202 | G | 0.25 | 0.2857 | A |
| 3 | BICF2G630340753        | 45676480 | A | 0.5  | 0.2857 | G |
| 3 | BICF2P299391           | 45683637 | 0 | 0    | 0      | A |
| 3 | BICF2S23540043         | 45696135 | A | 0.25 | 0.2857 | G |
| 3 | BICF2G630340757        | 45705417 | C | 0.25 | 0.2857 | A |
| 3 | BICF2G630340773        | 45718344 | A | 0    | 0      | G |
| 3 | BICF2S2359143          | 45725878 | G | 0    | 0      | A |
| 3 | BICF2G630340813        | 45746954 | G | 0.25 | 0.4286 | A |
| 3 | BICF2G630340827        | 45750809 | A | 0.25 | 0.4286 | G |
| 3 | BICF2P1150459          | 45768351 | A | 0    | 0      | G |
| 3 | BICF2G630340850        | 45774525 | G | 0    | 0      | A |
| 3 | BICF2P207885           | 45784224 | 0 | 0    | 0      | A |
| 3 | BICF2G630340864        | 45793545 | G | 0    | 0      | A |
| 3 | BICF2G630340881        | 45808638 | C | 0.25 | 0.3333 | G |
| 3 | BICF2G630340902        | 45820255 | A | 0    | 0      | G |
| 3 | BICF2G630340909        | 45831376 | G | 0.5  | 0.2857 | A |
| 3 | BICF2G630340913        | 45834497 | G | 0.5  | 0.2857 | A |
| 3 | BICF2G630340916        | 45844780 | G | 0    | 0      | A |
| 3 | BICF2G630340922        | 45852748 | G | 0.75 | 0.7143 | A |
| 3 | BICF2G630340927        | 45862403 | A | 0    | 0      | G |
| 3 | BICF2G630340930        | 45883843 | A | 0.25 | 0.4286 | G |
| 3 | BICF2G630340931        | 45885643 | G | 0    | 0      | A |
| 3 | BICF2G630340934        | 45898121 | G | 0    | 0      | A |
| 3 | BICF2G630340940        | 45912570 | G | 0    | 0      | A |
| 3 | BICF2G630340944        | 45920551 | G | 0.25 | 0.4286 | A |
| 3 | BICF2P1013202          | 45932586 | G | 0    | 0      | A |
| 3 | BICF2G630340989        | 45960132 | A | 1    | 1      | C |
| 3 | BICF2G630341007        | 45968752 | G | 0.25 | 0.4286 | A |
| 3 | BICF2G630341029        | 45981406 | A | 0.75 | 0.5714 | G |
| 3 | TIGRP2P42952_rs8811198 | 45995672 | 0 | 0    | 0      | C |
| 3 | BICF2S23113325         | 46008771 | 0 | 0    | 0      | G |
| 3 | BICF2G630341058        | 46013313 | G | 0.75 | 0.5714 | A |
| 3 | BICF2S2359785          | 46041527 | A | 0.25 | 0.2857 | G |
| 3 | BICF2G630341088        | 46046826 | G | 0    | 0      | A |
| 3 | BICF2G630341108        | 46058345 | A | 0.25 | 0.2857 | G |
| 3 | BICF2P554775           | 46072451 | A | 0.5  | 0.7143 | G |
| 3 | BICF2G630341140        | 46082745 | G | 0    | 0      | A |
| 3 | BICF2G630341141        | 46082799 | G | 0    | 0      | A |
| 3 | BICF2P226583           | 46092902 | C | 0.5  | 0.7143 | A |
| 3 | BICF2P705880           | 46109101 | G | 1    | 1      | A |
| 3 | BICF2P225883           | 46119146 | G | 0.75 | 0.7143 | A |
| 3 | BICF2P210686           | 46126626 | 0 | 0    | 0      | A |
| 3 | BICF2S24113788         | 46129799 | G | 0.75 | 0.7143 | A |
| 3 | BICF2G630341177        | 46147426 | G | 0.75 | 0.7143 | A |
| 3 | BICF2G630341181        | 46150382 | A | 0.75 | 0.7143 | G |

|   |                        |          |   |      |        |   |
|---|------------------------|----------|---|------|--------|---|
| 3 | BICF2G630341190        | 46169521 | A | 0.5  | 0.2857 | G |
| 3 | BICF2G630341202        | 46186173 | A | 0    | 0      | C |
| 3 | G251f39S186            | 46208036 | 0 | 0    | 0      | G |
| 3 | BICF2P1003568          | 46229417 | 0 | 0    | 0      | G |
| 3 | BICF2S23410777         | 46235344 | A | 0    | 0      | G |
| 3 | BICF2G630341206        | 46243521 | A | 0.5  | 0.2857 | G |
| 3 | BICF2G630341221        | 46255879 | A | 0.5  | 0.25   | C |
| 3 | BICF2G630341226        | 46268865 | G | 0.5  | 0.2857 | A |
| 3 | BICF2G630341238        | 46282868 | A | 0.5  | 0.2857 | G |
| 3 | BICF2S23610689         | 46289220 | A | 0.75 | 0.7143 | G |
| 3 | BICF2G630341243        | 46312671 | A | 0    | 0      | G |
| 3 | BICF2P352000           | 46343201 | G | 0.25 | 0.4286 | A |
| 3 | BICF2P511785           | 46346796 | A | 0.25 | 0.4286 | G |
| 3 | BICF2G630341245        | 46364683 | A | 0.75 | 0.5714 | G |
| 3 | BICF2G630341258        | 46372543 | G | 0    | 0      | A |
| 3 | TIGRP2P42954_rs9149511 | 46390942 | 0 | 0    | 0      | G |
| 3 | BICF2G630341259        | 46399999 | G | 0.75 | 0.7143 | A |
| 3 | BICF2G630341260        | 46409354 | 0 | 0    | 0      | G |
| 3 | BICF2G630341264        | 46458625 | G | 0    | 0      | A |
| 3 | BICF2G630341268        | 46467337 | A | 0    | 0      | G |
| 3 | BICF2G630341271        | 46498642 | A | 0.5  | 0.25   | C |
| 3 | BICF2G630341284        | 46506458 | A | 0.5  | 0.2857 | G |
| 3 | BICF2G630341298        | 46523619 | A | 0.5  | 0.2857 | C |
| 3 | BICF2G630341305        | 46530984 | C | 0    | 0      | A |
| 3 | BICF2G630341314        | 46542275 | C | 0    | 0      | A |
| 3 | BICF2S23160949         | 46564837 | A | 0    | 0      | G |
| 3 | BICF2S23649456         | 46616382 | G | 0.5  | 0.2857 | A |
| 3 | BICF2G630341331        | 46631875 | G | 0.5  | 0.2857 | A |
| 3 | BICF2G630341336        | 46639400 | C | 0.25 | 0.4286 | A |
| 3 | BICF2G630341356        | 46646251 | A | 0.25 | 0.4286 | G |
| 3 | BICF2P703683           | 46683073 | 0 | 0    | 0      | A |
| 3 | BICF2G630341360        | 46691807 | A | 0    | 0      | G |
| 3 | BICF2P669696           | 46702233 | A | 0    | 0      | G |
| 3 | BICF2G630341363        | 46739684 | 0 | 0    | 0      | T |
| 3 | BICF2G630341366        | 46748610 | G | 0    | 0      | A |
| 3 | TIGRP2P42963_rs9092855 | 46760455 | 0 | 0    | 0      | C |
| 3 | BICF2S23153423         | 46772012 | A | 0.25 | 0.4286 | G |
| 3 | BICF2P304511           | 46792256 | 0 | 0    | 0      | T |
| 3 | BICF2G630341376        | 46825437 | A | 0.5  | 0.2857 | C |
| 3 | BICF2G630341391        | 46832927 | A | 0.5  | 0.2857 | G |
| 3 | BICF2G630341403        | 46843957 | A | 0.75 | 0.7143 | C |
| 3 | BICF2G630341410        | 46851899 | G | 0.75 | 0.7143 | A |
| 3 | BICF2G630341422        | 46856261 | G | 0.75 | 0.7143 | C |
| 3 | BICF2P1410028          | 46864213 | A | 0.75 | 0.5714 | G |
| 3 | BICF2G630341438        | 46874044 | G | 0    | 0      | A |
| 3 | BICF2G630341451        | 46886951 | G | 0    | 0      | A |
| 3 | BICF2P1018831          | 46908459 | G | 0    | 0      | C |

|   |                         |           |   |      |        |   |
|---|-------------------------|-----------|---|------|--------|---|
| 3 | BICF2G630341479         | 46917064  | G | 0.25 | 0.2857 | A |
| 3 | BICF2G630341483         | 46924332  | A | 0.25 | 0.2857 | G |
| 3 | BICF2S22935424          | 46950934  | A | 0.5  | 0.2857 | G |
| 3 | BICF2G630341491         | 46977052  | A | 0.5  | 0.7143 | G |
| 3 | BICF2G630341492         | 46984347  | G | 0.5  | 0.2857 | C |
| 3 | BICF2G630341493         | 46992550  | A | 0.5  | 0.2857 | G |
| 3 | BICF2P567380            | 47012346  | 0 | 0    | 0      | C |
| 3 | BICF2G630341496         | 47033045  | A | 0    | 0      | G |
| 3 | BICF2P1426685           | 47046274  | A | 0    | 0      | C |
| 3 | BICF2P804475            | 47052807  | A | 0    | 0      | G |
| 3 | BICF2P1453798           | 47064332  | 0 | 0    | 0      | C |
| 3 | BICF2P227781            | 47073418  | A | 0    | 0      | G |
| 3 | BICF2P932403            | 47078606  | A | 0    | 0      | G |
| 3 | BICF2P368071            | 47086715  | A | 0    | 0      | C |
| 3 | BICF2P489172            | 47107220  | G | 0    | 0      | A |
| 3 | BICF2P1127703           | 471117124 | 0 | 0    | 0      | A |
| 3 | BICF2P1025882           | 47135124  | 0 | 0    | 0      | G |
| 3 | BICF2P645938            | 47147533  | 0 | 0    | 0      | A |
| 3 | TIGRP2P42971_rs8860098  | 47151340  | 0 | 0    | 0      | G |
| 3 | BICF2G630341507         | 47164178  | A | 0.75 | 0.7143 | G |
| 3 | BICF2P1004673           | 47175240  | G | 0.75 | 0.7143 | A |
| 3 | BICF2P1041506           | 47187165  | A | 0.75 | 0.7143 | T |
| 3 | BICF2P1058326           | 47194514  | G | 0.75 | 0.7143 | A |
| 3 | BICF2P1058327           | 47194645  | G | 0.75 | 0.7143 | A |
| 3 | BICF2G630341528         | 47198379  | C | 0.5  | 0.7143 | A |
| 3 | BICF2P841598            | 47213014  | A | 0.75 | 0.6    | C |
| 3 | BICF2S23034296          | 47229398  | C | 0.5  | 0.2857 | A |
| 3 | BICF2P286079            | 47237379  | A | 0.5  | 0.2857 | C |
| 3 | BICF2G630341544         | 47260773  | A | 0.75 | 0.7143 | C |
| 3 | BICF2P64775             | 47266457  | G | 0.25 | 0.4286 | A |
| 3 | BICF2G630341548         | 47282285  | A | 0    | 0      | G |
| 3 | BICF2S23551674          | 47299463  | A | 0    | 0      | T |
| 3 | BICF2P1075243           | 47304911  | T | 0    | 0      | A |
| 3 | BICF2G630341550         | 47319614  | G | 0    | 0      | A |
| 3 | BICF2S23625698          | 47326704  | A | 0.75 | 0.5714 | G |
| 3 | BICF2S23433417          | 47331901  | A | 0.5  | 0.7143 | G |
| 3 | BICF2S23550005          | 47338479  | G | 0    | 0      | A |
| 3 | BICF2S2359863           | 47343020  | G | 0    | 0      | A |
| 3 | BICF2S23417238          | 47348754  | A | 0.25 | 0.2857 | G |
| 3 | BICF2G630341593         | 47360896  | G | 0    | 0      | A |
| 3 | BICF2G630341597         | 47368642  | A | 0    | 0      | G |
| 3 | BICF2G630341612         | 47382183  | G | 0.5  | 0.2857 | A |
| 3 | BICF2G630341618         | 47392700  | G | 0.75 | 0.5714 | A |
| 3 | BICF2G630341654         | 47408410  | A | 0    | 0      | G |
| 3 | BICF2S22947478          | 47420606  | A | 0    | 0      | G |
| 3 | TIGRP2P107604_rs8885113 | 47426493  | 0 | 0    | 0      | G |
| 3 | BICF2G630341660         | 47441910  | G | 0    | 0      | A |

|   |                        |          |   |      |        |   |
|---|------------------------|----------|---|------|--------|---|
| 3 | BICF2G630341661        | 47462027 | G | 0.5  | 0.2857 | A |
| 3 | BICF2G630341669        | 47474157 | G | 0.5  | 0.2857 | C |
| 3 | BICF2P327833           | 47484646 | A | 0    | 0      | G |
| 3 | BICF2S2366790          | 47487148 | G | 0.5  | 0.2857 | A |
| 3 | TIGRP2P43002_rs8613954 | 47499394 | A | 0.5  | 0.2857 | C |
| 3 | TIGRP2P43006_rs8763585 | 47508529 | A | 0.5  | 0.2857 | G |
| 3 | BICF2P94700            | 47518643 | A | 0    | 0      | G |
| 3 | TIGRP2P43009_rs9194154 | 47531082 | A | 0    | 0      | G |
| 3 | BICF2G630341680        | 47543276 | G | 0    | 0      | A |
| 3 | BICF2G630341701        | 47554070 | G | 1    | 0.75   | A |
| 3 | BICF2G630341713        | 47574578 | G | 0.5  | 0.7143 | A |
| 3 | BICF2G630341724        | 47585499 | C | 0.25 | 0.4286 | G |
| 3 | BICF2G630341726        | 47590969 | C | 0    | 0      | A |
| 3 | BICF2G630341756        | 47606009 | A | 0.5  | 0.2857 | G |
| 3 | BICF2G630341767        | 47611665 | G | 0.75 | 0.7143 | A |
| 3 | BICF2G630341786        | 47627442 | A | 0.5  | 0.2857 | G |
| 3 | BICF2G630341790        | 47633164 | A | 0    | 0      | G |
| 3 | BICF2G630341794        | 47649379 | A | 0.25 | 0.2857 | G |
| 3 | BICF2G630341809        | 47657671 | A | 0    | 0      | G |
| 3 | BICF2G630341819        | 47662119 | G | 0    | 0      | A |
| 3 | BICF2G630341820        | 47677479 | 0 | 0    | 0      | A |
| 3 | BICF2P321592           | 47692430 | G | 0.25 | 0.2857 | A |
| 3 | BICF2P701892           | 47710735 | A | 0.5  | 0.7143 | G |
| 3 | BICF2P111391           | 47716066 | A | 0.25 | 0.4286 | G |
| 3 | BICF2P270861           | 47732652 | A | 0.5  | 0.2857 | G |
| 3 | BICF2P632856           | 47742699 | A | 0.25 | 0.2857 | G |
| 3 | BICF2G630341822        | 47764251 | 0 | 0    | 0      | G |
| 3 | BICF2P457992           | 47778623 | A | 0.25 | 0.4286 | G |
| 3 | TIGRP2P43067_rs8950841 | 47786975 | A | 0    | 0      | G |
| 3 | TIGRP2P43073_rs8796758 | 47797799 | A | 0    | 0      | G |
| 3 | BICF2P1506515          | 47810382 | A | 0    | 0      | G |
| 3 | BICF2G630341829        | 47822039 | C | 0.5  | 0.7143 | A |
| 3 | BICF2P1097910          | 47848325 | A | 0.5  | 0.2857 | G |
| 3 | BICF2G630341867        | 47856255 | A | 0.5  | 0.2857 | C |
| 3 | BICF2S2313861          | 47864535 | A | 0    | 0      | G |
| 3 | BICF2G630341893        | 47889869 | G | 0    | 0      | A |
| 3 | BICF2G630341905        | 47899656 | G | 0.25 | 0.4286 | A |
| 3 | BICF2G630341922        | 47910549 | C | 0.25 | 0.4286 | A |
| 3 | BICF2G630341924        | 47915261 | A | 0.25 | 0.4286 | G |
| 3 | BICF2G630341930        | 47924396 | A | 0.25 | 0.2857 | G |
| 3 | BICF2P626775           | 47938817 | G | 0    | 0      | C |
| 3 | BICF2P881714           | 47944625 | A | 0    | 0      | G |
| 3 | BICF2G630341953        | 47944786 | A | 0.25 | 0.2857 | G |
| 3 | BICF2P1259613          | 47963041 | G | 0    | 0      | A |
| 3 | BICF2P727856           | 47973222 | A | 0.5  | 0.2857 | G |
| 3 | TIGRP2P43123_rs9078122 | 47983585 | A | 0.25 | 0.4286 | G |
| 3 | BICF2P544095           | 47991544 | A | 0    | 0      | C |

|   |                        |          |   |      |        |   |
|---|------------------------|----------|---|------|--------|---|
| 3 | TIGRP2P43128_rs9154743 | 48003038 | C | 0    | 0      | A |
| 3 | BICF2P1460684          | 48013824 | G | 0    | 0      | A |
| 3 | TIGRP2P43139_rs8747445 | 48026036 | A | 0    | 0      | G |
| 3 | BICF2P620981           | 48042273 | C | 0.25 | 0.3571 | G |
| 3 | TIGRP2P43141_rs8556949 | 48054854 | G | 0    | 0      | A |
| 3 | BICF2P66852            | 48059810 | G | 0    | 0      | A |
| 3 | TIGRP2P43176_rs8829751 | 48141454 | 0 | 0    | 0      | A |
| 3 | BICF2P46955            | 48180068 | A | 0.25 | 0.2857 | G |
| 3 | BICF2P170932           | 48195150 | G | 0.5  | 0.6429 | A |
| 3 | BICF2P1116462          | 48202767 | C | 0.25 | 0.2857 | A |
| 3 | BICF2P416619           | 48217782 | G | 0.25 | 0.2857 | A |
| 3 | BICF2P245087           | 48230071 | A | 0.25 | 0.2857 | C |
| 3 | BICF2P790800           | 48233470 | G | 0    | 0      | A |
| 3 | TIGRP2P43195_rs8711997 | 48266577 | A | 0.25 | 0.2857 | G |
| 3 | BICF2P646035           | 48314597 | G | 0.25 | 0.25   | A |
| 3 | BICF2P1041612          | 48326158 | A | 0.25 | 0.2857 | G |
| 3 | BICF2P952644           | 48340282 | G | 0.5  | 0.3571 | C |
| 3 | BICF2P411942           | 48356813 | G | 0.25 | 0.2857 | A |
| 3 | BICF2S2357706          | 48366720 | A | 0.25 | 0.3571 | C |
| 3 | BICF2P1414521          | 48387997 | G | 0.25 | 0.3571 | A |
| 3 | TIGRP2P43242_rs9142432 | 48392545 | G | 0.25 | 0.3571 | A |
| 3 | BICF2P509355           | 48406122 | A | 0.25 | 0.3571 | G |
| 3 | BICF2P69764            | 48423251 | A | 0.25 | 0.3571 | C |
| 3 | BICF2S23211360         | 48456575 | C | 0    | 0      | A |
| 3 | BICF2P622583           | 48468443 | 0 | 0    | 0      | G |
| 3 | BICF2P508979           | 48475515 | A | 0    | 0      | G |
| 3 | BICF2P617639           | 48491565 | A | 0.5  | 0.3571 | G |
| 3 | BICF2P1012045          | 48500539 | G | 0.5  | 0.3571 | C |
| 3 | BICF2P957732           | 48515755 | A | 0    | 0      | C |
| 3 | BICF2P429917           | 48518810 | G | 0    | 0      | A |
| 3 | TIGRP2P43277_rs9112867 | 48534330 | 0 | 0    | 0      | A |
| 3 | BICF2P775828           | 48544454 | 0 | 0    | 0      | G |
| 3 | BICF2S23419889         | 48557713 | G | 0.5  | 0.3333 | A |
| 3 | TIGRP2P43282_rs8951545 | 48582174 | G | 0.5  | 0.3571 | A |
| 3 | BICF2S23434837         | 48602309 | 0 | 0    | 0      | G |
| 3 | TIGRP2P43290_rs8904658 | 48619926 | G | 0.25 | 0.2857 | A |
| 3 | BICF2S23763526         | 48622291 | G | 0.25 | 0.2857 | A |
| 3 | TIGRP2P43296_rs9251047 | 48636076 | A | 0    | 0      | C |
| 3 | BICF2P1059287          | 48652307 | C | 0.5  | 0.3571 | A |
| 3 | BICF2P1409573          | 48656627 | 0 | 0    | 0      | G |
| 3 | BICF2P81078            | 48674051 | G | 0.25 | 0.2857 | A |
| 3 | BICF2P386725           | 48680965 | G | 0.25 | 0.2857 | A |
| 3 | BICF2S23343347         | 48706968 | C | 0.5  | 0.3571 | A |
| 3 | TIGRP2P43310_rs8884436 | 48715280 | 0 | 0    | 0      | G |
| 3 | TIGRP2P43320_rs8941222 | 48734163 | C | 0.25 | 0.3571 | A |
| 3 | BICF2P710537           | 48737054 | G | 0    | 0      | A |
| 3 | BICF2P905084           | 48753066 | T | 0    | 0      | A |

|   |                        |          |   |      |        |   |
|---|------------------------|----------|---|------|--------|---|
| 3 | TIGRP2P43338_rs8711347 | 48800145 | A | 0.5  | 0.3571 | G |
| 3 | BICF2S2345469          | 48806975 | A | 0.5  | 0.3571 | G |
| 3 | BICF2P408958           | 48819877 | A | 0.5  | 0.6429 | T |
| 3 | BICF2P1382682          | 48837097 | G | 0    | 0      | A |
| 3 | BICF2P269531           | 48843117 | A | 0    | 0      | G |
| 3 | BICF2S23637784         | 48853189 | A | 0    | 0      | G |
| 3 | BICF2P1109077          | 48873558 | A | 1    | 1      | G |
| 3 | BICF2P1431921          | 48878860 | A | 1    | 1      | G |
| 3 | BICF2P241884           | 48880579 | A | 1    | 1      | G |
| 3 | BICF2P690735           | 48886741 | A | 0    | 0      | G |
| 3 | BICF2P818390           | 48903088 | A | 0    | 0      | C |
| 3 | BICF2P1010563          | 48914729 | C | 0    | 0      | A |
| 3 | BICF2P771998           | 48921928 | A | 0.5  | 0.3571 | G |
| 3 | BICF2S23331916         | 48932783 | G | 0    | 0      | A |
| 3 | BICF2P460650           | 48961588 | A | 0.5  | 0.6429 | G |
| 3 | BICF2P497253           | 48971248 | G | 0.5  | 0.6429 | A |
| 3 | BICF2P575277           | 48983968 | A | 0.5  | 0.6429 | G |
| 3 | BICF2S23114851         | 49000545 | A | 0.5  | 0.6429 | G |
| 3 | TIGRP2P43409_rs9238745 | 49002268 | G | 0.5  | 0.6429 | A |
| 3 | BICF2P1143318          | 49027809 | A | 0    | 0      | G |
| 3 | BICF2P360179           | 49039696 | G | 0    | 0      | A |
| 3 | BICF2S23054481         | 49070024 | 0 | 0    | 0      | A |
| 3 | BICF2S23210420         | 49080479 | A | 0.5  | 0.6429 | G |
| 3 | BICF2P199404           | 49085376 | A | 0    | 0      | C |
| 3 | BICF2P573237           | 49099344 | 0 | 0    | 0      | G |
| 3 | BICF2P794721           | 49105243 | 0 | 0    | 0      | G |
| 3 | BICF2P1213834          | 49119013 | 0 | 0    | 0      | G |
| 3 | BICF2S23252915         | 49133642 | A | 0    | 0      | G |
| 3 | BICF2P939368           | 49176126 | A | 0    | 0      | G |
| 3 | TIGRP2P43446_rs8921649 | 49198264 | A | 0    | 0      | C |
| 3 | BICF2P357072           | 49225143 | 0 | 0    | 0      | A |
| 3 | BICF2P685913           | 49247737 | T | 0    | 0      | A |
| 3 | BICF2P801170           | 49261686 | G | 0    | 0      | A |
| 3 | BICF2P740677           | 49278072 | C | 1    | 1      | A |
| 3 | BICF2P452121           | 49294235 | G | 0    | 0      | A |
| 3 | BICF2S23431990         | 49310104 | A | 0    | 0      | G |
| 3 | BICF2S23344894         | 49321425 | A | 1    | 1      | C |
| 3 | BICF2S23344617         | 49325263 | A | 1    | 1      | G |
| 3 | BICF2S23545799         | 49367005 | A | 0.5  | 0.6429 | G |
| 3 | BICF2S23322476         | 49378670 | A | 0.5  | 0.6429 | G |
| 3 | BICF2S23313295         | 49390061 | A | 1    | 1      | T |
| 3 | BICF2P552173           | 49411858 | G | 0.75 | 0.6429 | A |
| 3 | BICF2P118183           | 49423415 | A | 0    | 0      | G |
| 3 | TIGRP2P43454_rs8930478 | 49433529 | G | 1    | 1      | A |
| 3 | BICF2P977875           | 49446545 | A | 0    | 0      | G |
| 3 | BICF2P416762           | 49454281 | A | 0    | 0      | G |
| 3 | TIGRP2P43467_rs9191118 | 49468675 | 0 | 0    | 0      | G |

|   |                        |          |   |      |        |   |
|---|------------------------|----------|---|------|--------|---|
| 3 | BICF2P1462174          | 49480516 | G | 0.25 | 0.2857 | A |
| 3 | BICF2S23634659         | 49490953 | G | 0    | 0      | A |
| 3 | BICF2P1244112          | 49504025 | G | 0    | 0      | A |
| 3 | TIGRP2P43480_rs8711497 | 49508273 | T | 0    | 0      | A |
| 3 | BICF2S22935902         | 49524907 | 0 | 0    | 0      | G |
| 3 | BICF2P1371167          | 49538829 | A | 0    | 0      | G |
| 3 | BICF2S2444296          | 49550147 | 0 | 0    | 0      | A |
| 3 | TIGRP2P43485_rs9072900 | 49562707 | 0 | 0    | 0      | G |
| 3 | BICF2P104696           | 49569663 | 0 | 0    | 0      | A |
| 3 | BICF2P1081431          | 49579647 | G | 0    | 0      | A |
| 3 | BICF2P336849           | 49591455 | A | 0    | 0      | G |
| 3 | BICF2P689516           | 49600756 | A | 0.75 | 0.7143 | G |
| 3 | BICF2P411522           | 49602835 | A | 0    | 0      | G |
| 3 | BICF2P216217           | 49619879 | G | 0    | 0      | A |
| 3 | BICF2P1109826          | 49628484 | G | 0    | 0      | A |
| 3 | BICF2P992312           | 49638463 | 0 | 0    | 0      | C |
| 3 | TIGRP2P43520_rs8566114 | 49646752 | C | 0    | 0      | A |
| 3 | BICF2P777990           | 49660497 | G | 0    | 0      | A |
| 3 | BICF2P6182             | 49680612 | G | 1    | 1      | A |
| 3 | TIGRP2P43535_rs8522305 | 49703366 | A | 0.25 | 0.2857 | G |
| 3 | TIGRP2P43536_rs8983965 | 49721051 | 0 | 0    | 0      | C |
| 3 | BICF2S23913703         | 49743106 | 0 | 0    | 0      | G |
| 3 | BICF2P124425           | 49759222 | 0 | 0    | 0      | A |
| 3 | TIGRP2P43539_rs9129306 | 49763180 | A | 0.25 | 0.3571 | G |
| 3 | BICF2P1280201          | 49776468 | A | 0.25 | 0.3571 | G |
| 3 | BICF2P920675           | 49807406 | 0 | 0    | 0      | A |
| 3 | BICF2P904947           | 49843003 | 0 | 0    | 0      | C |
| 3 | BICF2P180878           | 49852688 | A | 0.5  | 0.3571 | C |
| 3 | BICF2S23716406         | 49864849 | G | 0    | 0      | C |
| 3 | BICF2P799126           | 49905504 | C | 0.75 | 0.7143 | A |
| 3 | BICF2P119710           | 49916642 | 0 | 0    | 0      | A |
| 3 | BICF2P71635            | 49941323 | 0 | 0    | 0      | C |
| 3 | BICF2P288751           | 49952729 | A | 0.5  | 0.3571 | G |
| 3 | BICF2S23049367         | 49965293 | A | 0    | 0      | G |
| 3 | BICF2S23427095         | 49996694 | A | 0    | 0      | G |
| 3 | BICF2P599622           | 50069770 | 0 | 0    | 0      | G |
| 3 | BICF2S23052135         | 50074261 | A | 0    | 0      | G |
| 3 | BICF2P1237424          | 50101305 | G | 0    | 0      | A |
| 3 | BICF2P279463           | 50107992 | G | 0.25 | 0.2857 | C |
| 3 | BICF2S23058351         | 50133368 | A | 0.25 | 0.2857 | G |
| 3 | TIGRP2P43568_rs8991953 | 50145224 | G | 0.25 | 0.2857 | A |
| 3 | BICF2P1040112          | 50157317 | G | 0.25 | 0.3571 | A |
| 3 | BICF2P1081093          | 50174116 | 0 | 0    | 0      | A |
| 3 | BICF2S23524990         | 50178660 | A | 0    | 0      | G |
| 3 | BICF2P136191           | 50193904 | 0 | 0    | 0      | A |
| 3 | BICF2P140578           | 50209351 | A | 0    | 0      | G |
| 3 | BICF2P1418437          | 50226414 | A | 0.5  | 0.3571 | G |



|   |                        |          |   |      |        |   |
|---|------------------------|----------|---|------|--------|---|
| 3 | TIGRP2P43587_rs8708977 | 50247389 | 0 | 0    | 0      | G |
| 3 | BICF2P1223807          | 50255938 | G | 0.25 | 0.3571 | A |
| 3 | TIGRP2P43599_rs9064856 | 50267225 | 0 | 0    | 0      | G |
| 3 | BICF2P905416           | 50290207 | C | 0.5  | 0.6667 | A |
| 3 | BICF2P146329           | 50304137 | A | 0    | 0      | G |
| 3 | TIGRP2P43611_rs8764675 | 50318315 | 0 | 0    | 0      | G |
| 3 | BICF2P699800           | 50330095 | C | 0.25 | 0.2857 | A |
| 3 | BICF2P1367028          | 50336106 | G | 0.25 | 0.2857 | A |
| 3 | BICF2P1349104          | 50359092 | C | 0.25 | 0.2857 | A |
| 3 | BICF2S23326476         | 50370738 | 0 | 0    | 0      | G |
| 3 | BICF2P649296           | 50389940 | A | 0    | 0      | G |
| 3 | BICF2P257821           | 50398822 | A | 0    | 0      | G |
| 3 | BICF2P257820           | 50398905 | A | 0    | 0      | C |
| 3 | BICF2P235641           | 50403783 | A | 0    | 0      | G |
| 3 | BICF2P235640           | 50403922 | G | 0    | 0      | A |
| 3 | TIGRP2P43642_rs8665397 | 50404660 | G | 0    | 0      | A |
| 3 | BICF2S23150313         | 50425248 | A | 0    | 0      | G |
| 3 | TIGRP2P43677_rs8680257 | 50427964 | A | 0    | 0      | G |
| 3 | BICF2P968952           | 50447243 | A | NA   | 0.3571 | G |
| 3 | TIGRP2P43686_rs8535575 | 50455954 | A | 0    | 0      | G |
| 3 | BICF2P576935           | 50473364 | A | 0    | 0      | G |
| 3 | BICF2P888225           | 50480269 | G | 0    | 0      | A |
| 3 | BICF2P1121544          | 50508105 | A | 0    | 0      | G |
| 3 | BICF2P902317           | 50509722 | A | 0    | 0      | G |
| 3 | BICF2P901297           | 50516162 | G | 0    | 0      | A |
| 3 | TIGRP2P43703_rs8619113 | 50521165 | G | 0    | 0      | A |
| 3 | TIGRP2P43707_rs8784101 | 50539646 | A | 0    | 0      | G |
| 3 | TIGRP2P43712_rs8544229 | 50548541 | A | 0    | 0      | G |
| 3 | BICF2P196697           | 50554700 | A | 0.25 | 0.2857 | G |
| 3 | BICF2P66339            | 50571877 | A | 0.75 | 0.6429 | G |
| 3 | BICF2P970603           | 50577823 | A | 0.75 | 0.6429 | G |
| 3 | BICF2P548052           | 50580673 | A | 0.75 | 0.6429 | G |
| 3 | BICF2P261287           | 50608403 | A | 1    | 1      | G |
| 3 | TIGRP2P43732_rs9088588 | 50632464 | C | 1    | 1      | A |
| 3 | TIGRP2P43736_rs8654288 | 50653808 | C | 0.5  | 0.4167 | A |
| 3 | BICF2S23313783         | 50664319 | G | 1    | 1      | A |
| 3 | TIGRP2P43747_rs9174560 | 50674011 | A | 1    | 1      | G |
| 3 | BICF2P934094           | 50690325 | G | 0.75 | 0.7143 | A |
| 3 | BICF2P379254           | 50697288 | A | 0.75 | 0.7143 | C |
| 3 | TIGRP2P43764_rs8649845 | 50712595 | A | 0    | 0      | G |
| 3 | TIGRP2P43766_rs8649844 | 50715130 | A | 0    | 0      | G |
| 3 | BICF2P471365           | 50737830 | A | 0    | 0      | G |
| 3 | BICF2P69681            | 50740095 | A | 0    | 0      | G |
| 3 | BICF2S23431126         | 50767096 | A | 0    | 0      | G |
| 3 | BICF2P908788           | 50783161 | A | 0.25 | 0.2857 | G |
| 3 | BICF2P915945           | 50788221 | G | 0.5  | 0.3571 | C |
| 3 | BICF2P681112           | 50797287 | G | 0.25 | 0.2857 | A |

|   |                        |          |   |      |        |   |
|---|------------------------|----------|---|------|--------|---|
| 3 | TIGRP2P43786_rs8652092 | 50823311 | A | 0.75 | 0.6429 | C |
| 3 | BICF2P466157           | 50825738 | A | 0.5  | 0.3571 | C |
| 3 | BICF2S23325013         | 50838957 | A | 0.75 | 0.6429 | G |
| 3 | BICF2P716851           | 50842299 | A | 0    | 0      | G |
| 3 | BICF2P1141190          | 50853483 | A | 0    | 0      | G |
| 3 | BICF2P601694           | 50867172 | G | 0    | 0      | A |
| 3 | BICF2P1221529          | 50879889 | A | 0.75 | 0.6429 | G |
| 3 | BICF2S2412246          | 50914556 | A | 0    | 0      | G |
| 3 | TIGRP2P43832_rs8800673 | 50924601 | A | 0    | 0      | C |
| 3 | BICF2P409204           | 50940931 | A | 0    | 0      | G |
| 3 | TIGRP2P43842_rs8817770 | 50945638 | A | 0    | 0      | G |
| 3 | BICF2P856624           | 50961131 | G | 0.25 | 0.2857 | A |
| 3 | BICF2S23325948         | 50962554 | A | 0.25 | 0.2857 | C |
| 3 | BICF2S2338207          | 50972108 | C | 0    | 0      | A |
| 3 | BICF2P555991           | 50983719 | A | 0    | 0      | G |
| 3 | BICF2P28182            | 51010226 | C | 0    | 0      | G |
| 3 | TIGRP2P43888_rs8831376 | 51018465 | A | 0    | 0      | G |
| 3 | BICF2P923746           | 51018487 | G | 0    | 0      | A |
| 3 | BICF2P17016            | 51043706 | A | 0.25 | 0.2857 | G |
| 3 | BICF2P920304           | 51055740 | G | 0.25 | 0.2857 | A |
| 3 | BICF2S23715254         | 51075543 | A | 0.5  | 0.3571 | C |
| 3 | TIGRP2P43926_rs9027764 | 51083690 | G | 0.5  | 0.3571 | A |
| 3 | BICF2P179731           | 51094337 | A | 0    | 0      | G |
| 3 | BICF2P179733           | 51094956 | A | 0    | 0      | G |
| 3 | BICF2P299996           | 51114246 | A | 0.75 | 0.6429 | G |
| 3 | TIGRP2P43932_rs9158460 | 51127898 | A | 0    | 0      | G |
| 3 | BICF2P572576           | 51134367 | G | 0.25 | 0.2857 | A |
| 3 | TIGRP2P43956_rs8976778 | 51141845 | 0 | 0    | 0      | G |
| 3 | BICF2P65435            | 51155555 | G | 0.5  | 0.3571 | A |
| 3 | TIGRP2P43980_rs9084836 | 51165073 | G | 0.25 | 0.2857 | A |
| 3 | BICF2P1093594          | 51179049 | A | 0.25 | 0.3571 | C |
| 3 | TIGRP2P43987_rs8645164 | 51194893 | A | 0.75 | 0.6429 | G |
| 3 | BICF2P95716            | 51207726 | A | 0.5  | 0.3571 | G |
| 3 | BICF2P1385988          | 51210397 | G | 0    | 0      | A |
| 3 | BICF2P170040           | 51221027 | G | 0.5  | 0.3571 | A |
| 3 | BICF2P1230346          | 51222231 | G | 0.5  | 0.3571 | A |
| 3 | BICF2S22937296         | 51241822 | G | 0.5  | 0.3571 | A |
| 3 | BICF2P1243654          | 51247299 | C | 0.25 | 0.3571 | A |
| 3 | BICF2P591088           | 51275771 | A | 0.25 | 0.3333 | C |
| 3 | BICF2P1010983          | 51279055 | A | 0    | 0.2857 | G |
| 3 | TIGRP2P44021_rs8775299 | 51290232 | A | 0    | 0      | G |
| 3 | BICF2P1110357          | 51307598 | A | 0    | 0      | G |
| 3 | BICF2P1315838          | 51315230 | C | 0    | 0      | A |
| 3 | BICF2P235961           | 51343538 | A | 0.25 | 0.3571 | G |
| 3 | BICF2P707145           | 51350669 | G | 0    | 0      | A |
| 3 | BICF2P408573           | 51377296 | G | 0.25 | 0.2857 | A |
| 3 | BICF2P1108386          | 51378652 | A | 0.25 | 0.2857 | G |

|   |                        |          |   |      |        |   |
|---|------------------------|----------|---|------|--------|---|
| 3 | BICF2P422004           | 51386480 | A | 0    | 0      | C |
| 3 | BICF2P117647           | 51399957 | G | 0    | 0      | A |
| 3 | TIGRP2P44070_rs8966334 | 51405959 | G | 0    | 0      | A |
| 3 | TIGRP2P44084_rs8735993 | 51418812 | A | 0.25 | 0.2857 | G |
| 3 | BICF2P83480            | 51428513 | A | 0.75 | 0.6429 | G |
| 3 | BICF2P590394           | 51439957 | C | 0.75 | 0.6429 | A |
| 3 | BICF2P792339           | 51457098 | A | 0.75 | 0.7143 | G |
| 3 | BICF2P736243           | 51466307 | G | 0.25 | 0.2857 | A |
| 3 | BICF2P823623           | 51474541 | C | 0.25 | 0.3571 | A |
| 3 | BICF2P861827           | 51496222 | A | 0    | 0      | G |
| 3 | BICF2P950127           | 51517073 | A | 0    | 0      | G |
| 3 | TIGRP2P44134_rs8816289 | 51517240 | A | 0    | 0      | G |
| 3 | BICF2P820977           | 51524876 | G | 0.25 | 0.3571 | A |
| 3 | BICF2P874397           | 51541371 | G | 0    | 0      | A |
| 3 | BICF2S23658443         | 51546152 | A | 0.25 | 0.3571 | G |
| 3 | BICF2P1121178          | 51555795 | A | 0    | 0      | G |
| 3 | TIGRP2P44162_rs9076906 | 51568325 | A | 0    | 0      | G |
| 3 | BICF2P193711           | 51582025 | G | 0.25 | 0.2857 | A |
| 3 | BICF2S22940000         | 51597793 | G | 0.5  | 0.3571 | A |
| 3 | TIGRP2P44186_rs8812771 | 51621549 | A | 0.5  | 0.3333 | G |
| 3 | TIGRP2P44188_rs8717237 | 51630672 | A | 0.5  | 0.6429 | G |
| 3 | BICF2P1027127          | 51641125 | G | 0    | 0      | A |
| 3 | TIGRP2P44206_rs8905582 | 51651301 | G | 1    | 1      | C |
| 3 | BICF2P52992            | 51663319 | G | 0.75 | 0.6429 | A |
| 3 | BICF2S2451509          | 51672879 | G | 0    | 0      | A |
| 3 | BICF2P663151           | 51681296 | G | 0.5  | 0.3571 | A |
| 3 | TIGRP2P44217_rs8524162 | 51696939 | A | 0.5  | 0.3571 | G |
| 3 | BICF2P111009           | 51704709 | G | 0.5  | 0.6429 | A |
| 3 | BICF2S23453029         | 51711327 | A | 0.5  | 0.6429 | G |
| 3 | BICF2P893059           | 51723615 | A | 0.5  | 0.3571 | G |
| 3 | BICF2P991573           | 51763781 | G | 0.25 | 0.2857 | A |
| 3 | BICF2P1212481          | 51773534 | A | 0.75 | 0.7143 | G |
| 3 | BICF2P229582           | 51798802 | A | 0.25 | 0.3571 | C |
| 3 | BICF2P921155           | 51813605 | G | 0.5  | 0.3571 | A |
| 3 | BICF2P1308013          | 51819602 | C | 0.5  | 0.3571 | A |
| 3 | BICF2P412106           | 51836152 | A | 0.25 | 0.3571 | G |
| 3 | BICF2S23334142         | 51849664 | G | 0    | 0.3333 | A |
| 3 | BICF2P284629           | 51855646 | G | 0.25 | 0.2857 | A |
| 3 | TIGRP2P44253_rs8686903 | 51863124 | C | 0.5  | 0.3571 | G |
| 3 | TIGRP2P44260_rs8695140 | 51869204 | G | 0.5  | 0.3571 | A |
| 3 | BICF2P266385           | 51877782 | A | 0.25 | 0.2857 | G |
| 3 | BICF2P1082896          | 51893285 | C | 0.5  | 0.3571 | A |
| 3 | BICF2P554275           | 51913312 | G | 0.5  | 0.3571 | A |
| 3 | BICF2P300063           | 51924565 | A | 0    | 0      | G |
| 3 | BICF2P274947           | 51937230 | A | 0.25 | 0.3571 | G |
| 3 | TIGRP2P44272_rs9137246 | 51953845 | T | 0    | 0      | A |
| 3 | BICF2P1146917          | 51958700 | G | 0    | 0      | A |

|   |                        |          |   |      |        |   |
|---|------------------------|----------|---|------|--------|---|
| 3 | BICF2P1263809          | 51971193 | G | 0.5  | 0.3571 | A |
| 3 | TIGRP2P44276_rs8613795 | 51988373 | 0 | 0    | 0      | G |
| 3 | TIGRP2P44278_rs8764029 | 52017595 | A | 0.5  | 0.3571 | G |
| 3 | BICF2P114641           | 52026619 | A | 0.5  | 0.3333 | G |
| 3 | BICF2P601431           | 52028635 | G | 0.75 | 0.6429 | A |
| 3 | TIGRP2P44281_rs9103118 | 52040593 | G | 0.5  | 0.3571 | A |
| 3 | TIGRP2P44283_rs8868505 | 52058570 | G | 0.5  | 0.3333 | A |
| 3 | BICF2P1260010          | 52063515 | G | 0.5  | 0.3571 | A |
| 3 | BICF2P573109           | 52072336 | G | 0.5  | 0.3571 | A |
| 3 | BICF2S23435447         | 52087102 | C | 0.5  | 0.3571 | G |
| 3 | TIGRP2P44286_rs9169939 | 52095041 | C | 0.5  | 0.3571 | A |
| 3 | BICF2P876669           | 52113353 | A | 0.5  | 0.3333 | G |
| 3 | TIGRP2P44290_rs8625527 | 52124026 | A | 0.5  | 0.3571 | G |
| 3 | BICF2P944359           | 52138319 | A | 0.5  | 0.3571 | G |
| 3 | TIGRP2P44296_rs9147030 | 52142664 | A | 0.5  | 0.3571 | G |
| 3 | TIGRP2P44300_rs8748342 | 52162947 | G | 0.5  | 0.3571 | A |
| 3 | TIGRP2P44301_rs8895405 | 52170087 | A | 0.5  | 0.3571 | G |
| 3 | BICF2P687613           | 52184775 | G | 0.25 | 0.25   | A |
| 3 | BICF2P528674           | 52196205 | C | 0    | 0      | A |
| 3 | BICF2P46818            | 52200995 | A | 0.75 | 0.7143 | C |
| 3 | BICF2S23649907         | 52220465 | A | 0.25 | 0.3571 | G |
| 3 | BICF2P1332217          | 52231894 | A | 0.25 | 0.3571 | G |
| 3 | BICF2P178716           | 52235252 | A | 0    | 0      | G |
| 3 | BICF2S2334503          | 52254560 | G | 0.75 | 0.6429 | A |
| 3 | BICF2P244978           | 52264153 | 0 | 0    | 0      | G |
| 3 | BICF2S23442987         | 52269077 | G | 0.25 | 0.3571 | A |
| 3 | BICF2S23430879         | 52294303 | C | 0    | 0      | A |
| 3 | BICF2P885986           | 52313018 | A | 0.75 | 0.7143 | G |
| 3 | BICF2P1390236          | 52315046 | A | 0.75 | 0.7143 | C |
| 3 | BICF2P1101079          | 52335942 | G | 0    | 0      | A |
| 3 | BICF2P745285           | 52338496 | C | 0    | 0      | A |
| 3 | BICF2P1284188          | 52355369 | T | 0    | 0      | A |
| 3 | BICF2P1284189          | 52355386 | 0 | 0    | 0      | G |
| 3 | TIGRP2P44401_rs8623038 | 52367323 | G | 0.75 | 0.6429 | A |
| 3 | TIGRP2P44407_rs8710523 | 52373627 | A | 0    | 0      | C |
| 3 | BICF2P889119           | 52387462 | 0 | 0    | 0      | A |
| 3 | TIGRP2P44416_rs8663241 | 52395675 | G | 0    | 0      | A |
| 3 | BICF2S23014752         | 52431157 | G | 0.5  | 0.3571 | A |
| 3 | BICF2P1125015          | 52448049 | 0 | 0    | 0      | G |
| 3 | TIGRP2P44421_rs8819250 | 52451735 | A | 0    | 0      | G |
| 3 | BICF2P50199            | 52466631 | 0 | 0    | 0      | A |
| 3 | BICF2P944575           | 52485526 | A | 0.5  | 0.6429 | G |
| 3 | BICF2P944569           | 52486561 | A | 0.5  | 0.6429 | C |
| 3 | BICF2P1422190          | 52498099 | G | 0.5  | 0.6429 | A |
| 3 | BICF2P1057404          | 52515137 | A | 0    | 0      | G |
| 3 | BICF2P234063           | 52529658 | A | 0.75 | 0.6429 | C |
| 3 | TIGRP2P44447_rs9028694 | 52537221 | A | 0.75 | 0.6429 | G |

|   |                         |          |   |      |        |   |
|---|-------------------------|----------|---|------|--------|---|
| 3 | BICF2P63522             | 52548350 | G | 1    | 1      | A |
| 3 | BICF2P743032            | 52564401 | G | 0.75 | 0.7143 | A |
| 3 | BICF2P1108719           | 52572108 | G | 0.75 | 0.7143 | A |
| 3 | BICF2P1038875           | 52586945 | A | 0.25 | 0.2857 | G |
| 3 | BICF2S23520724          | 52598578 | A | 0    | 0      | C |
| 3 | BICF2S23715583          | 52605332 | G | 0.25 | 0.3571 | A |
| 3 | BICF2P10837             | 52623524 | 0 | 0    | 0      | G |
| 3 | TIGRP2P444466_rs8793696 | 52631521 | A | 0    | 0      | G |
| 3 | BICF2P992370            | 52631763 | A | 0    | 0      | G |
| 3 | BICF2P643845            | 52638422 | A | 0.5  | 0.6429 | G |
| 3 | BICF2P984407            | 52648283 | A | 0.5  | 0.3571 | G |
| 3 | BICF2S2335582           | 52661140 | C | 0    | 0      | A |
| 3 | BICF2P560507            | 52673002 | G | 0    | 0      | A |
| 3 | BICF2S23659404          | 52683025 | G | 0    | 0      | A |
| 3 | BICF2S2326411           | 52695933 | C | 0.5  | 0.3571 | A |
| 3 | BICF2P722675            | 52705136 | C | 0.5  | 0.3571 | A |
| 3 | BICF2P1064847           | 52720884 | A | 0    | 0      | G |
| 3 | BICF2P265831            | 52734099 | A | 0.5  | 0.6429 | G |
| 3 | BICF2P912945            | 52739680 | A | 0.5  | 0.6429 | G |
| 3 | BICF2P312995            | 52760551 | G | 0    | 0      | A |
| 3 | BICF2P899090            | 52765315 | A | 0    | 0      | G |
| 3 | BICF2S23137549          | 52795650 | 0 | 0    | 0      | C |
| 3 | BICF2P742960            | 52804066 | G | 0.5  | 0.3571 | A |
| 3 | BICF2S229432            | 52811539 | C | 0    | 0      | G |
| 3 | BICF2P54257             | 52820643 | A | 0.5  | 0.3571 | G |
| 3 | BICF2P1416443           | 52845712 | G | 0    | 0      | A |
| 3 | BICF2S23020373          | 52864469 | C | 0    | 0      | A |
| 3 | BICF2P663112            | 52868607 | A | 0.75 | 0.6429 | C |
| 3 | BICF2P739380            | 52886174 | T | 0.5  | 0.3571 | A |
| 3 | BICF2P771807            | 52894396 | G | 0    | 0      | A |
| 3 | BICF2S22938607          | 52906696 | A | 0    | 0      | C |
| 3 | BICF2P880059            | 52910478 | A | 0    | 0      | T |
| 3 | BICF2P97590             | 52912216 | A | 0    | 0      | G |
| 3 | BICF2P993641            | 52928063 | A | 0.25 | 0.2857 | G |
| 3 | BICF2P475301            | 52944082 | G | 0.25 | 0.2857 | A |
| 3 | BICF2P1135353           | 52947122 | A | 0    | 0      | C |
| 3 | TIGRP2P44515_rs9191790  | 52961389 | A | 0.25 | 0.2857 | G |
| 3 | TIGRP2P44529_rs8887331  | 52973030 | A | 0.25 | 0.2857 | G |
| 3 | BICF2P1322570           | 52984514 | G | 0    | 0      | A |
| 3 | BICF2P693545            | 52993270 | A | 0.5  | 0.6429 | C |
| 3 | BICF2S23514203          | 53007306 | G | 0    | 0      | A |
| 3 | BICF2P263938            | 53025697 | G | 1    | 1      | A |
| 3 | BICF2S22955571          | 53037990 | T | 0    | 0      | A |
| 3 | BICF2P52557             | 53039085 | A | 0    | 0      | G |
| 3 | BICF2S23736202          | 53059698 | G | 0.5  | 0.6429 | A |
| 3 | BICF2S23158270          | 53068455 | G | 0    | 0      | A |
| 3 | BICF2S22944430          | 53091856 | A | 0    | 0.2857 | G |

|   |                        |          |   |      |        |   |
|---|------------------------|----------|---|------|--------|---|
| 3 | BICF2S2319554          | 53096655 | G | 0.25 | 0.2857 | A |
| 3 | BICF2P340993           | 53108429 | G | 0    | 0      | A |
| 3 | BICF2P689890           | 53129004 | A | 0.25 | 0.2857 | G |
| 3 | BICF2P1293197          | 53131074 | C | 0.75 | 0.7143 | A |
| 3 | BICF2P273204           | 53151334 | A | 0    | 0      | G |
| 3 | BICF2P6915             | 53159147 | G | 1    | 1      | A |
| 3 | BICF2P1070866          | 53167043 | A | 0.25 | 0.2857 | C |
| 3 | TIGRP2P44559_rs9212998 | 53181806 | G | 0    | 0      | A |
| 3 | BICF2P893699           | 53193767 | G | 0.25 | 0.2857 | A |
| 3 | BICF2S23518923         | 53203952 | A | 0    | 0      | G |
| 3 | BICF2P68877            | 53213774 | C | 0    | 0      | A |
| 3 | BICF2P1235551          | 53230138 | C | 0    | 0      | A |
| 3 | BICF2P332059           | 53239314 | G | 0    | 0      | A |
| 3 | BICF2P1408651          | 53260264 | A | 0    | 0      | G |
| 3 | BICF2P1059412          | 53274357 | G | 0    | 0      | A |
| 3 | BICF2P423203           | 53291074 | G | 0    | 0      | A |
| 3 | TIGRP2P44616_rs9187212 | 53306554 | 0 | 0    | 0      | G |
| 3 | BICF2P363011           | 53316722 | A | 0.5  | 0.3571 | G |
| 3 | BICF2P958474           | 53326168 | G | 0    | 0      | C |
| 3 | BICF2S23454295         | 53339867 | C | 0    | 0      | A |
| 3 | TIGRP2P44648_rs8941449 | 53358362 | A | 0    | 0      | G |
| 3 | G254f58S5              | 53378603 | G | 0    | 0      | A |
| 3 | BICF2P1365820          | 53416869 | 0 | 0    | 0      | A |
| 3 | BICF2S23212208         | 53427695 | A | 0    | 0      | G |
| 3 | BICF2P1038569          | 53431294 | G | 0    | 0      | A |
| 3 | BICF2P314623           | 53442796 | C | 0    | 0      | A |
| 3 | BICF2P1324021          | 53458497 | 0 | 0    | 0      | A |
| 3 | BICF2P884099           | 53465040 | 0 | 0    | 0      | A |
| 3 | BICF2P512470           | 53483301 | C | 0    | 0      | A |
| 3 | TIGRP2P44653_rs8998553 | 53506504 | A | 0    | 0      | G |
| 3 | TIGRP2P44655_rs8933932 | 53516242 | A | 0    | 0      | G |
| 3 | BICF2P872446           | 53528305 | A | 0    | 0      | G |
| 3 | BICF2P674653           | 53538925 | C | 0    | 0      | A |
| 3 | BICF2P1028986          | 53545467 | A | 0.25 | 0.2857 | G |
| 3 | BICF2P1426828          | 53564068 | A | 0    | 0      | T |
| 3 | TIGRP2P44692_rs8898988 | 53570326 | 0 | 0    | 0      | G |
| 3 | BICF2S23431697         | 53581087 | A | 0    | 0      | C |
| 3 | BICF2P223830           | 53591510 | 0 | 0    | 0      | A |
| 3 | BICF2S23915468         | 53606030 | A | 0    | 0      | G |
| 3 | BICF2P704841           | 53609120 | G | 1    | 1      | A |
| 3 | BICF2P618708           | 53626857 | C | 0    | 0      | A |
| 3 | TIGRP2P44721_rs9021873 | 53636717 | 0 | 0    | 0      | A |
| 3 | BICF2P290854           | 53648456 | 0 | 0    | 0      | G |
| 3 | BICF2S23239266         | 53665761 | G | 0.25 | 0.2857 | A |
| 3 | TIGRP2P44734_rs8965412 | 53677126 | A | 0.25 | 0.2857 | C |
| 3 | BICF2P633314           | 53686410 | A | 0    | 0      | G |
| 3 | BICF2P809883           | 53710832 | A | 0.25 | 0.2857 | C |

|   |                        |          |   |      |        |   |
|---|------------------------|----------|---|------|--------|---|
| 3 | BICF2P749436           | 53717819 | A | 0    | 0      | C |
| 3 | BICF2P638865           | 53735777 | 0 | 0    | 0      | A |
| 3 | BICF2P236945           | 53740437 | 0 | 0    | 0      | A |
| 3 | BICF2P856127           | 53758292 | A | 0    | 0      | G |
| 3 | BICF2P546627           | 53763219 | G | 0    | 0      | A |
| 3 | BICF2S23915658         | 53782384 | A | 0.75 | 0.7143 | C |
| 3 | BICF2P639571           | 53786283 | G | 1    | 1      | A |
| 3 | BICF2P404880           | 53798499 | G | 0    | 0      | A |
| 3 | BICF2P1330533          | 53806734 | T | 0    | 0      | A |
| 3 | BICF2P1330530          | 53809232 | A | 0.75 | 0.7143 | G |
| 3 | BICF2P451172           | 53824359 | A | 0    | 0      | T |
| 3 | BICF2P773672           | 53840474 | G | 0    | 0      | A |
| 3 | BICF2P173134           | 53844020 | A | 0    | 0      | G |
| 3 | BICF2S23419852         | 53875193 | A | 0    | 0      | G |
| 3 | BICF2S23513086         | 53882908 | G | 0.25 | 0.2857 | A |
| 3 | BICF2S2305914          | 53889874 | A | 0    | 0      | G |
| 3 | BICF2P1448707          | 53901580 | A | 0    | 0      | T |
| 3 | BICF2S22910036         | 53912183 | A | 1    | 1      | G |
| 3 | BICF2S23312245         | 53929785 | A | 1    | 1      | C |
| 3 | BICF2P625943           | 53940622 | A | 0    | 0      | G |
| 3 | BICF2S2362588          | 53951656 | A | 0.25 | 0.2857 | C |
| 3 | BICF2S23631021         | 53963519 | A | 1    | 1      | G |
| 3 | BICF2P1106056          | 53978961 | A | 0.75 | 0.7143 | G |
| 3 | BICF2P249986           | 53983379 | A | 1    | 1      | G |
| 3 | BICF2S23744551         | 53997714 | G | 0.25 | 0.2857 | A |
| 3 | BICF2S23448000         | 54019637 | A | 0    | 0      | G |
| 3 | BICF2S23447998         | 54019904 | A | 1    | 1      | G |
| 3 | BICF2S23618401         | 54034161 | G | 0    | 0      | A |
| 3 | BICF2P1276947          | 54047298 | G | 1    | 1      | A |
| 3 | TIGRP2P44863_rs9127806 | 54051694 | G | 1    | 1      | A |
| 3 | TIGRP2P44868_rs9085285 | 54063241 | A | 0.25 | 0.2857 | G |
| 3 | BICF2S23746185         | 54065452 | G | 0    | 0      | C |
| 3 | BICF2P1428463          | 54071460 | A | 0.25 | 0.2857 | C |
| 3 | BICF2P798582           | 54073108 | A | 0    | 0      | G |
| 3 | BICF2P463368           | 54086045 | G | 0    | 0      | A |
| 3 | BICF2P74349            | 54101477 | G | 0    | 0      | A |
| 3 | BICF2S23059076         | 54117714 | A | 0.75 | 0.7143 | G |
| 3 | BICF2P602661           | 54125429 | A | 0.75 | 0.7143 | G |
| 3 | BICF2P797821           | 54138989 | G | 0.25 | 0.2857 | C |
| 3 | BICF2S23447407         | 54142311 | G | 0.75 | 0.7143 | A |
| 3 | BICF2S23152168         | 54160905 | G | 0    | 0      | A |
| 3 | BICF2P386012           | 54178180 | G | 0    | 0      | A |
| 3 | BICF2P1185597          | 54192969 | G | 1    | 1      | A |
| 3 | BICF2P236884           | 54202813 | A | 0.25 | 0.2857 | G |
| 3 | BICF2S23550151         | 54203311 | G | 0    | 0      | A |
| 3 | BICF2P966382           | 54221303 | G | 0    | 0      | C |
| 3 | BICF2P1320211          | 54222577 | G | 0    | 0      | A |

|   |                        |          |   |      |        |   |
|---|------------------------|----------|---|------|--------|---|
| 3 | BICF2P1098349          | 54238168 | A | 0    | 0      | G |
| 3 | BICF2S23145338         | 54253010 | 0 | 0    | 0      | G |
| 3 | BICF2P150141           | 54258373 | A | 0    | 0      | C |
| 3 | BICF2P150142           | 54258488 | G | 0    | 0      | A |
| 3 | BICF2P1330114          | 54263618 | G | 0    | 0      | A |
| 3 | BICF2P490547           | 54274430 | A | 0    | 0      | G |
| 3 | BICF2P354228           | 54287564 | A | 0.25 | 0.2857 | C |
| 3 | BICF2S22947643         | 54300967 | T | 1    | 1      | A |
| 3 | BICF2S22935897         | 54305243 | A | 0    | 0      | G |
| 3 | BICF2P801933           | 54318404 | C | 0    | 0      | A |
| 3 | BICF2S23121736         | 54328008 | 0 | 0    | 0      | G |
| 3 | BICF2S2317646          | 54337965 | G | 0    | 0      | A |
| 3 | TIGRP2P44949_rs9095011 | 54351354 | A | 0    | 0      | C |
| 3 | BICF2P469289           | 54364353 | A | 1    | 1      | G |
| 3 | BICF2P125449           | 54379452 | 0 | 0    | 0      | C |
| 3 | BICF2S23145664         | 54393433 | T | 0    | 0      | A |
| 3 | BICF2S23317753         | 54414543 | A | 0    | 0      | G |
| 3 | TIGRP2P44951_rs8570923 | 54418694 | 0 | 0    | 0      | C |
| 3 | BICF2P423212           | 54431043 | G | 0    | 0      | A |
| 3 | BICF2P1053453          | 54455902 | A | 0    | 0      | G |
| 3 | BICF2P888363           | 54477636 | 0 | 0    | 0      | A |
| 3 | BICF2S23355550         | 54493689 | A | 0.25 | 0.2857 | G |
| 3 | BICF2S22940311         | 54521549 | A | 0.25 | 0.2857 | G |
| 3 | BICF2P1250963          | 54540089 | 0 | 0    | 0      | A |
| 3 | BICF2P1374449          | 54562372 | 0 | 0    | 0      | A |
| 3 | TIGRP2P44955_rs8657221 | 54574333 | 0 | 0    | 0      | G |
| 3 | BICF2P361611           | 54589685 | G | 0.25 | 0.2857 | A |
| 3 | BICF2P589675           | 54591630 | G | 0.25 | 0.2857 | A |
| 3 | BICF2S22925601         | 54619135 | A | 0    | 0      | G |
| 3 | BICF2S23153080         | 54635232 | G | 1    | 1      | A |
| 3 | BICF2S2291106          | 54637127 | A | 1    | 1      | G |
| 3 | BICF2P995123           | 54666903 | T | 0    | 0      | A |
| 3 | BICF2P1066948          | 54681203 | A | 0    | 0      | G |
| 3 | BICF2P1066951          | 54682780 | C | 0.75 | 0.7143 | G |
| 3 | TIGRP2P44992_rs8579777 | 54694616 | C | 0    | 0      | A |
| 3 | TIGRP2P45011_rs9208280 | 54712535 | A | 0.75 | 0.7143 | G |
| 3 | BICF2S23711086         | 54718911 | T | 0    | 0      | A |
| 3 | TIGRP2P45019_rs9104661 | 54729458 | A | 0.25 | 0.2857 | G |
| 3 | BICF2P1143865          | 54731201 | A | 0.25 | 0.2857 | G |
| 3 | BICF2S23356370         | 54767312 | G | 0.75 | 0.7143 | A |
| 3 | BICF2P905650           | 54775434 | G | 1    | 1      | A |
| 3 | BICF2P638856           | 54793396 | 0 | 0    | 0      | A |
| 3 | BICF2P88321            | 54797908 | A | 0    | 0      | C |
| 3 | BICF2P1370151          | 54826270 | A | 0.25 | 0.2857 | G |
| 3 | BICF2P843390           | 54831916 | A | 0.25 | 0.2857 | G |
| 3 | BICF2S2326663          | 54837339 | G | 1    | 1      | A |
| 3 | BICF2P913573           | 54845641 | A | 0    | 0      | G |



|   |                        |          |   |      |        |   |
|---|------------------------|----------|---|------|--------|---|
| 3 | BICF2P525801           | 54859347 | A | 0    | 0      | G |
| 3 | BICF2P487224           | 54867980 | G | 0.75 | 0.7143 | A |
| 3 | BICF2P1368727          | 54882411 | G | 0.75 | 0.7143 | A |
| 3 | BICF2S23911371         | 54890331 | A | 0.25 | 0.2857 | G |
| 3 | BICF2P378975           | 54910110 | G | 0    | 0      | A |
| 3 | BICF2P804036           | 54923295 | G | 0    | 0      | A |
| 3 | BICF2P126124           | 54927291 | A | 0    | 0      | G |
| 3 | BICF2P776971           | 54941361 | A | 0    | 0      | C |
| 3 | TIGRP2P46011_rs8639372 | 54954538 | A | 0    | 0      | C |
| 3 | BICF2P1391272          | 54967906 | G | 0    | 0      | A |
| 3 | BICF2P1391277          | 54971748 | G | 0    | 0      | A |
| 3 | BICF2P1137753          | 54989650 | A | 0.25 | 0.2857 | G |
| 3 | BICF2P1282690          | 54997381 | A | 0.25 | 0.2857 | G |
| 3 | BICF2S2356168          | 55011878 | A | 0    | 0      | G |
| 3 | BICF2S23643916         | 55018170 | A | 0    | 0      | C |
| 3 | BICF2P311666           | 55033159 | A | 0.25 | 0.2857 | G |
| 3 | BICF2P445387           | 55047093 | C | 0    | 0      | G |
| 3 | BICF2P579292           | 55057390 | 0 | 0    | 0      | A |
| 3 | BICF2P1367838          | 55071459 | 0 | 0    | 0      | A |
| 3 | TIGRP2P46028_rs9195993 | 55073754 | A | 1    | 1      | G |
| 3 | G255f49S50             | 55085017 | G | 0    | 0      | A |
| 3 | BICF2P1330621          | 55114205 | A | 0    | 0      | G |
| 3 | BICF2S23138463         | 55128931 | A | 0    | 0      | G |
| 3 | BICF2S23442092         | 55136194 | C | 0    | 0      | A |
| 3 | BICF2S23035503         | 55147296 | C | 0    | 0      | A |
| 3 | BICF2P456629           | 55157929 | G | 0.75 | 0.7143 | A |
| 3 | BICF2S23118209         | 55168117 | A | 0    | 0      | G |
| 3 | TIGRP2P46039_rs8660428 | 55183399 | A | 0    | 0      | G |
| 3 | BICF2P777556           | 55232129 | T | 0.75 | 0.7143 | A |
| 3 | BICF2P356709           | 55242126 | A | 0    | 0      | G |
| 3 | BICF2P564273           | 55250188 | A | 0.25 | 0.2857 | C |
| 3 | BICF2S23619253         | 55260355 | G | 1    | 1      | C |
| 3 | BICF2P1426885          | 55270728 | A | 0.25 | 0.2857 | G |
| 3 | BICF2S23711940         | 55284784 | 0 | 0    | 0      | A |
| 3 | BICF2S23148129         | 55287596 | A | 0    | 0      | T |
| 3 | BICF2S2357894          | 55289371 | A | 0    | 0      | G |
| 3 | BICF2P1159620          | 55292221 | A | 0.25 | 0.2857 | G |
| 3 | BICF2P515330           | 55300786 | A | 0    | 0      | G |
| 3 | BICF2P351574           | 55307553 | 0 | 0    | 0      | G |
| 3 | BICF2S23613080         | 55319424 | 0 | 0    | 0      | G |
| 3 | BICF2P387760           | 55335308 | G | 0    | 0      | A |
| 3 | BICF2S22936695         | 55342144 | A | 0.25 | 0.2857 | G |
| 3 | BICF2S23549343         | 55360264 | G | 0    | 0      | A |
| 3 | BICF2P638432           | 55366221 | A | 0.25 | 0.2857 | G |
| 3 | BICF2P679587           | 55375823 | G | 0.25 | 0.2857 | A |
| 3 | BICF2S23047550         | 55385795 | A | 0    | 0      | G |
| 3 | TIGRP2P46116_rs8756252 | 55403128 | A | 0.25 | 0.2857 | G |

|   |                        |          |   |      |        |   |
|---|------------------------|----------|---|------|--------|---|
| 3 | BICF2P1353429          | 55416892 | G | 0    | 0      | A |
| 3 | BICF2S23615375         | 55423607 | C | 0.25 | 0.2857 | A |
| 3 | TIGRP2P46133_rs8968403 | 55431543 | A | 0    | 0      | G |
| 3 | BICF2P1350820          | 55457601 | A | 0    | 0      | G |
| 3 | BICF2P1153163          | 55467376 | G | 0    | 0      | A |
| 3 | TIGRP2P46150_rs8784424 | 55484738 | G | 0    | 0      | A |
| 3 | BICF2S23763081         | 55490426 | 0 | 0    | 0      | A |
| 3 | BICF2P463061           | 55510437 | G | 0    | 0      | A |
| 3 | BICF2S233314           | 55518288 | C | 0    | 0      | G |
| 3 | BICF2P474501           | 55531762 | G | 1    | 1      | A |
| 3 | TIGRP2P46163_rs9021452 | 55554924 | A | 1    | 1      | G |
| 3 | BICF2S23752024         | 55561389 | A | 1    | 1      | G |
| 3 | TIGRP2P46169_rs8906864 | 55576425 | A | 1    | 1      | G |
| 3 | BICF2P403503           | 55578124 | G | 1    | 1      | A |
| 3 | BICF2P288112           | 55586976 | A | 1    | 1      | G |
| 3 | BICF2P1300512          | 55597276 | A | 0    | 0      | G |
| 3 | TIGRP2P46185_rs8721322 | 55606271 | A | 1    | 1      | G |
| 3 | TIGRP2P46192_rs8646740 | 55615364 | A | 0    | 0      | G |
| 3 | BICF2P716666           | 55619056 | A | 1    | 1      | G |
| 3 | BICF2P871170           | 55623487 | A | 1    | 1      | G |
| 3 | BICF2P702506           | 55635154 | A | 0    | 0      | G |
| 3 | BICF2P1387550          | 55639110 | A | 0    | 0      | G |
| 3 | BICF2P1048394          | 55643579 | A | 0    | 0      | G |
| 3 | BICF2P1031402          | 55653365 | G | 1    | 1      | A |
| 3 | TIGRP2P46216_rs8578059 | 55660225 | A | 0    | 0      | G |
| 3 | BICF2P258826           | 55700004 | 0 | 0    | 0      | G |
| 3 | BICF2P1256187          | 55727655 | 0 | 0    | 0      | A |
| 3 | BICF2P522834           | 55736109 | G | 1    | 1      | A |
| 3 | BICF2P1451351          | 55755973 | G | 1    | 1      | A |
| 3 | BICF2S23035325         | 55772900 | A | 1    | 1      | G |
| 3 | BICF2P354567           | 55787413 | G | 1    | 1      | A |
| 3 | TIGRP2P46258_rs8984567 | 55820441 | A | 1    | 1      | G |
| 3 | BICF2P622783           | 55821310 | A | 1    | 1      | G |
| 3 | TIGRP2P46272_rs8866951 | 55850602 | A | 1    | 1      | C |
| 3 | BICF2P162832           | 55868631 | G | 1    | 1      | A |
| 3 | BICF2P1421165          | 55883084 | G | 0.25 | 0      | A |
| 3 | BICF2P302065           | 55902728 | 0 | 0    | 0      | G |
| 3 | BICF2G630342021        | 55917898 | 0 | 0    | 0      | G |
| 3 | BICF2S23160800         | 55929551 | A | 0    | 0      | C |
| 3 | BICF2S23910594         | 55945329 | 0 | 0    | 0      | A |
| 3 | BICF2P688425           | 55952453 | C | 0.75 | 0.7143 | A |
| 3 | TIGRP2P46284_rs8838138 | 55981354 | A | 0    | 0      | T |
| 3 | BICF2P939679           | 55985032 | G | 0.25 | 0.2857 | A |
| 3 | BICF2P39442            | 55993521 | A | 0.25 | 0.2857 | G |
| 3 | BICF2S2332226          | 56005866 | A | 0.25 | 0.2857 | G |
| 3 | TIGRP2P46301_rs8960321 | 56022284 | A | 0    | 0      | G |
| 3 | BICF2P463721           | 56033699 | A | 0    | 0      | G |

|   |                        |          |   |      |        |   |
|---|------------------------|----------|---|------|--------|---|
| 3 | BICF2P322996           | 56043692 | A | 0    | 0      | G |
| 3 | TIGRP2P46309_rs8861647 | 56060376 | G | 0.25 | 0.2857 | C |
| 3 | TIGRP2P46311_rs8786028 | 56065303 | G | 0.25 | 0.2857 | A |
| 3 | TIGRP2P46315_rs9029249 | 56083779 | A | 0.25 | 0.2857 | C |
| 3 | TIGRP2P46324_rs8685794 | 56095589 | C | 0.25 | 0.2857 | A |
| 3 | BICF2P1126097          | 56098529 | G | 0.25 | 0.2857 | A |
| 3 | BICF2P195763           | 56114909 | A | 0.25 | 0.2857 | C |
| 3 | TIGRP2P46332_rs8567961 | 56134051 | A | 0.25 | 0.2857 | G |
| 3 | BICF2S23061083         | 56154248 | G | 0    | 0      | A |
| 3 | BICF2P948021           | 56156029 | G | 0.75 | 0.7143 | A |
| 3 | BICF2P948022           | 56156335 | A | 0.75 | 0.7143 | G |
| 3 | BICF2P1043804          | 56161311 | G | 0.75 | 0.7143 | A |
| 3 | BICF2P1371206          | 56170412 | A | 0    | 0      | G |
| 3 | TIGRP2P46350_rs9087864 | 56188542 | A | 0    | 0      | G |
| 3 | BICF2P43046            | 56192526 | C | 0    | 0      | A |
| 3 | BICF2P861945           | 56209231 | 0 | 0    | 0      | G |
| 3 | BICF2S2292455          | 56222665 | A | 0.25 | 0.2857 | C |
| 3 | BICF2S23420033         | 56233790 | A | 0    | 0      | G |
| 3 | BICF2S23152312         | 56245215 | G | 0.75 | 0.7143 | A |
| 3 | BICF2S23122083         | 56248415 | G | 0.75 | 0.7143 | A |
| 3 | BICF2S2398108          | 56265218 | C | 0.75 | 0.7143 | A |
| 3 | TIGRP2P46358_rs9083132 | 56270102 | 0 | 0    | 0      | A |
| 3 | BICF2S23111383         | 56303651 | C | 0.75 | 0.7143 | A |
| 3 | BICF2S23139400         | 56392703 | G | 0.75 | 0.7143 | A |
| 3 | BICF2P1459020          | 56412039 | 0 | 0    | 0      | C |
| 3 | BICF2G630342023        | 56423596 | A | 0.5  | 0.5    | G |
| 3 | BICF2S23139601         | 56446713 | G | 0.75 | 0.7143 | C |
| 3 | BICF2S23135235         | 56455534 | G | 0.5  | 0.5    | A |
| 3 | BICF2P1199134          | 56468276 | A | 1    | 1      | G |
| 3 | BICF2P1107829          | 56484982 | 0 | 0    | 0      | A |
| 3 | BICF2P1292085          | 56490759 | 0 | 0    | 0      | G |
| 3 | BICF2P1317713          | 56504090 | G | 0    | 0      | C |
| 3 | BICF2P1143742          | 56522827 | A | 1    | 1      | G |
| 3 | BICF2P731226           | 56544884 | A | 0.25 | 0.2857 | G |
| 3 | BICF2P1296465          | 56556413 | A | 0    | 0      | C |
| 3 | BICF2P1296466          | 56556653 | A | 0.25 | 0.2857 | G |
| 3 | TIGRP2P46387_rs8705305 | 56561903 | 0 | 0    | 0      | A |
| 3 | BICF2P157564           | 56573250 | A | 0.25 | 0.2857 | G |
| 3 | BICF2P1285815          | 56587122 | 0 | 0    | 0      | G |
| 3 | BICF2P1028290          | 56602528 | A | 0.25 | 0.2857 | G |
| 3 | BICF2P1028292          | 56603378 | G | 0.25 | 0.2857 | A |
| 3 | BICF2P812355           | 56623830 | A | 0    | 0      | G |
| 3 | BICF2P527992           | 56639179 | A | 0    | 0      | G |
| 3 | BICF2S23340184         | 56649556 | G | 0.25 | 0.2857 | A |
| 3 | BICF2P752720           | 56663579 | G | 1    | 1      | A |
| 3 | BICF2P1356640          | 56682293 | A | 0.25 | 0.2857 | G |
| 3 | BICF2P906599           | 56691492 | A | 0.25 | 0.2857 | G |

|   |                        |          |   |      |        |   |
|---|------------------------|----------|---|------|--------|---|
| 3 | BICF2S23356321         | 56697128 | C | 0.25 | 0.2857 | A |
| 3 | BICF2S23761113         | 56707855 | A | 0.25 | 0.2857 | C |
| 3 | BICF2P1378482          | 56730586 | A | 1    | 0.8    | G |
| 3 | BICF2P631541           | 56733617 | A | 0.75 | 0.7143 | T |
| 3 | BICF2P264970           | 56741149 | A | 0.75 | 0.7143 | G |
| 3 | BICF2P539248           | 56758127 | C | 0.75 | 0.7143 | A |
| 3 | BICF2P161096           | 56764379 | A | 0.75 | 0.7143 | G |
| 3 | BICF2S23244869         | 56777831 | A | 0.25 | 0.2857 | G |
| 3 | BICF2S23056688         | 56804659 | A | 0.25 | 0.2857 | G |
| 3 | BICF2P219474           | 56813514 | A | 0.5  | 0.3571 | C |
| 3 | BICF2S23013305         | 56840375 | A | 0.25 | 0.3571 | G |
| 3 | BICF2P596472           | 56851954 | G | 0.5  | 0.3571 | A |
| 3 | BICF2P345400           | 56876770 | A | 0.75 | 0.7143 | G |
| 3 | BICF2P978508           | 56884190 | C | 0.75 | 0.7143 | A |
| 3 | BICF2P1153515          | 56896699 | A | 0.75 | 0.7143 | G |
| 3 | BICF2P310206           | 56912174 | G | 0.75 | 0.7143 | A |
| 3 | BICF2P910151           | 56914137 | G | 0.75 | 0.7143 | A |
| 3 | BICF2S22951931         | 56925222 | A | 0.75 | 0.7143 | C |
| 3 | BICF2P193033           | 56936966 | A | 0.25 | 0.2857 | G |
| 3 | TIGRP2P46395_rs8740992 | 56954200 | C | 0.5  | 0.5    | A |
| 3 | BICF2P1364239          | 56965210 | A | 0    | 0      | G |
| 3 | BICF2P590783           | 56972702 | A | 0.25 | 0.2857 | C |
| 3 | BICF2P1337240          | 56985805 | G | 0.25 | 0.2857 | A |
| 3 | BICF2P317914           | 56995051 | G | 0.25 | 0.2857 | A |
| 3 | BICF2P1323306          | 57008087 | A | 0.25 | 0.3571 | G |
| 3 | BICF2P779616           | 57021552 | G | 0    | 0      | A |
| 3 | BICF2P154842           | 57034238 | 0 | 0    | 0      | G |
| 3 | BICF2P935449           | 57047258 | A | 0.5  | 0.3571 | G |
| 3 | BICF2P985389           | 57060019 | A | 0.5  | 0.3571 | G |
| 3 | BICF2P1359456          | 57072376 | G | 0.25 | 0.2857 | A |
| 3 | BICF2P576393           | 57080840 | A | 0.75 | 0.7143 | G |
| 3 | BICF2P1317716          | 57087733 | G | 0    | 0      | A |
| 3 | BICF2P1058409          | 57101425 | A | 1    | 0.75   | G |
| 3 | BICF2P225679           | 57110010 | G | 0    | 0      | A |
| 3 | BICF2P206965           | 57125969 | 0 | 0    | 0      | A |
| 3 | TIGRP2P46442_rs8769072 | 57141407 | A | 0.25 | 0.2857 | G |
| 3 | TIGRP2P46443_rs8697444 | 57149997 | 0 | 0    | 0      | C |
| 3 | BICF2P345423           | 57161195 | G | 0.75 | 0.7143 | C |
| 3 | BICF2P543344           | 57178980 | A | 0.25 | 0.2857 | G |
| 3 | BICF2P1216525          | 57180109 | A | 0.75 | 0.7143 | G |
| 3 | BICF2P1381745          | 57200871 | A | 0.25 | 0.2857 | G |
| 3 | TIGRP2P46456_rs8554843 | 57203362 | A | 0.25 | 0.2857 | G |
| 3 | BICF2S23039528         | 57226928 | A | 0.75 | 0.7143 | G |
| 3 | BICF2P1291007          | 57241368 | C | 0.75 | 0.7143 | A |
| 3 | BICF2S23510470         | 57263998 | A | 0    | 0      | G |
| 3 | BICF2P562243           | 57276207 | G | 0.25 | 0.2857 | A |
| 3 | BICF2P1342834          | 57289365 | T | 0.25 | 0.2857 | A |

|   |                        |          |   |      |        |   |
|---|------------------------|----------|---|------|--------|---|
| 3 | BICF2P805006           | 57300053 | G | 0.25 | 0.2857 | A |
| 3 | BICF2P1021727          | 57308756 | A | 0.25 | 0.2857 | G |
| 3 | TIGRP2P46459_rs8776472 | 57317093 | 0 | 0    | 0      | C |
| 3 | BICF2P361688           | 57344170 | C | 0.25 | 0.2857 | A |
| 3 | BICF2P777989           | 57355000 | A | 0.25 | 0.2857 | C |
| 3 | BICF2P1417321          | 57364905 | 0 | 0    | 0      | A |
| 3 | BICF2P35707            | 57382494 | A | 0.25 | 0.3571 | G |
| 3 | BICF2S22916819         | 57386010 | A | 0.25 | 0.3571 | G |
| 3 | BICF2S22951824         | 57396505 | A | 0    | 0      | C |
| 3 | BICF2P662576           | 57409524 | C | 0.75 | 0.6429 | A |
| 3 | BICF2P1340094          | 57427279 | G | 0.75 | 0.6429 | A |
| 3 | TIGRP2P46461_rs8541124 | 57440651 | A | 0.5  | 0.3571 | G |
| 3 | BICF2P713565           | 57449719 | G | 0.25 | 0.2857 | C |
| 3 | BICF2P326886           | 57456374 | A | 0.25 | 0.2857 | G |
| 3 | TIGRP2P46481_rs8815653 | 57466015 | C | 0.25 | 0.2857 | A |
| 3 | BICF2S23740841         | 57479877 | C | 0    | 0.2    | A |
| 3 | BICF2P64002            | 57495652 | G | 0.75 | 0.6429 | A |
| 3 | TIGRP2P46486_rs8889937 | 57500181 | G | 0.25 | 0.2857 | A |
| 3 | BICF2P861110           | 57505722 | A | 0    | 0.2    | G |
| 3 | BICF2P1155019          | 57522939 | A | 0    | 0      | G |
| 3 | BICF2P975550           | 57525613 | A | 0    | 0      | G |
| 3 | BICF2P723850           | 57538269 | A | 0    | 0      | G |
| 3 | BICF2P560104           | 57542327 | G | 0    | 0      | A |
| 3 | BICF2P560110           | 57543179 | C | 0    | 0      | G |
| 3 | BICF2P1056437          | 57556755 | G | 0    | 0      | A |
| 3 | BICF2P259449           | 57565870 | A | 0    | 0      | G |
| 3 | BICF2P1018628          | 57574407 | T | 0.5  | 0.3571 | A |
| 3 | BICF2P72059            | 57580692 | A | 0.5  | 0.3571 | G |
| 3 | BICF2P1014029          | 57592947 | A | 0    | 0      | G |
| 3 | TIGRP2P46511_rs8488293 | 57619212 | 0 | 0    | 0      | G |
| 3 | BICF2S22924381         | 57635546 | G | 0.5  | 0.3571 | A |
| 3 | BICF2P1024513          | 57646931 | C | 0    | 0      | A |
| 3 | BICF2P708229           | 57660110 | G | 0.75 | 0.7143 | A |
| 3 | BICF2P958059           | 57663178 | G | 0.75 | 0.7143 | A |
| 3 | BICF2P233194           | 57679896 | 0 | 0    | 0      | A |
| 3 | TIGRP2P46520_rs9200949 | 57694118 | A | 0.5  | 0.3571 | G |
| 3 | TIGRP2P46522_rs9184580 | 57698908 | A | 0.5  | 0.3571 | C |
| 3 | TIGRP2P46531_rs8655673 | 57714433 | G | 0    | 0      | A |
| 3 | BICF2P1326842          | 57724382 | A | 0    | 0      | G |
| 3 | BICF2P1417439          | 57732551 | G | 0    | 0      | A |
| 3 | BICF2S23051663         | 57762949 | A | 0    | 0      | G |
| 3 | BICF2P163789           | 57842562 | 0 | 0    | 0      | A |
| 3 | BICF2P1046163          | 57873830 | G | 0    | 0      | A |
| 3 | BICF2P797490           | 57889602 | A | 0    | 0      | G |
| 3 | BICF2P446253           | 57894658 | G | 0    | 0      | A |
| 3 | BICF2S23615791         | 57901338 | A | 0.5  | 0.6429 | G |
| 3 | BICF2S23611102         | 57905632 | A | 0.5  | 0.3571 | C |

|   |                        |          |   |      |        |   |
|---|------------------------|----------|---|------|--------|---|
| 3 | BICF2P1301559          | 57916874 | A | 0.25 | 0.3571 | G |
| 3 | BICF2S23018890         | 57936120 | G | 0.25 | 0.2857 | A |
| 3 | BICF2P1226516          | 57959197 | G | 0.25 | 0.3571 | C |
| 3 | BICF2P17124            | 57962088 | A | 0.25 | 0.3571 | G |
| 3 | TIGRP2P46568_rs9002672 | 57973552 | A | 0.75 | 0.6429 | G |
| 3 | BICF2P1028009          | 57983293 | A | 0.25 | 0.25   | G |
| 3 | BICF2P121699           | 57995232 | G | 0.5  | 0.3571 | A |
| 3 | BICF2P278666           | 58012067 | A | 0.25 | 0.2857 | G |
| 3 | BICF2P278665           | 58012250 | G | 0.25 | 0.2857 | A |
| 3 | BICF2P277878           | 58020190 | A | 0    | 0      | G |
| 3 | TIGRP2P46582_rs8739278 | 58036898 | G | 0.25 | 0.2857 | A |
| 3 | BICF2P1087702          | 58037821 | G | 0.25 | 0.2857 | A |
| 3 | BICF2P938427           | 58042150 | G | 0    | 0      | A |
| 3 | BICF2P30081            | 58056951 | T | 0    | 0      | A |
| 3 | BICF2P30088            | 58059094 | T | 0    | 0      | A |
| 3 | BICF2P908905           | 58065298 | A | 0    | 0      | G |
| 3 | BICF2P315515           | 58085421 | A | 0.25 | 0.2857 | G |
| 3 | BICF2S23525130         | 58085457 | A | 0.25 | 0.2857 | G |
| 3 | BICF2P459166           | 58085809 | A | 0.25 | 0.2857 | G |
| 3 | TIGRP2P46607_rs9218681 | 58089420 | A | 0.75 | 0.7143 | G |
| 3 | BICF2P940514           | 58100165 | G | 0.25 | 0.2857 | A |
| 3 | BICF2P240528           | 58119584 | A | 0.5  | 0.3571 | G |
| 3 | BICF2P648237           | 58132433 | G | 0.5  | 0.6429 | A |
| 3 | TIGRP2P46634_rs9067170 | 58149643 | A | 0.5  | 0.3571 | C |
| 3 | TIGRP2P46636_rs9180353 | 58164266 | A | 0.25 | 0.2857 | C |
| 3 | BICF2P1291281          | 58171553 | A | 0.5  | 0.6429 | G |
| 3 | BICF2S23010495         | 58184886 | A | 0.5  | 0.3571 | G |
| 3 | TIGRP2P46645_rs8576557 | 58196157 | A | 0    | 0      | G |
| 3 | BICF2S2365882          | 58210466 | A | 0    | 0      | G |
| 3 | BICF2P265483           | 58223247 | A | 0.5  | 0.3571 | G |
| 3 | BICF2S23328993         | 58258912 | A | 1    | 1      | G |
| 3 | TIGRP2P46656_rs9079808 | 58270801 | 0 | 0    | 0      | G |
| 3 | BICF2S23216141         | 58293204 | A | 0.25 | 0.2857 | G |
| 3 | TIGRP2P46658_rs8716954 | 58307845 | A | 0.75 | 0.7143 | G |
| 3 | BICF2P1209036          | 58316859 | 0 | 0    | 0      | G |
| 3 | BICF2S23056517         | 58338037 | C | 0.75 | 0.6429 | G |
| 3 | BICF2P336175           | 58340653 | 0 | 0    | 0      | C |
| 3 | BICF2P787395           | 58383063 | G | 0.5  | 0.3571 | A |
| 3 | BICF2P666894           | 58395936 | G | 0    | 0      | A |
| 3 | TIGRP2P46681_rs9107480 | 58404885 | G | 0    | 0      | A |
| 3 | BICF2P352274           | 58415007 | 0 | 0    | 0      | C |
| 3 | BICF2P623061           | 58432433 | G | 0.25 | 0.3571 | A |
| 3 | TIGRP2P46685_rs9017831 | 58447539 | 0 | 0    | 0      | G |
| 3 | BICF2S2412808          | 58487083 | C | 0.25 | 0.3571 | A |
| 3 | BICF2P701755           | 58489468 | A | 0    | 0      | G |
| 3 | BICF2P450864           | 58506050 | C | 0    | 0      | A |
| 3 | BICF2S2378091          | 58513008 | A | 0    | 0      | G |

|   |                        |          |   |      |        |   |
|---|------------------------|----------|---|------|--------|---|
| 3 | BICF2P527246           | 58515391 | G | 0    | 0      | A |
| 3 | BICF2P1423477          | 58533073 | G | 1    | 1      | A |
| 3 | BICF2P1423478          | 58533583 | A | 1    | 1      | G |
| 3 | TIGRP2P46709_rs8672244 | 58541916 | 0 | 0    | 0      | C |
| 3 | BICF2P600703           | 58553691 | A | 0    | 0      | G |
| 3 | TIGRP2P46718_rs8761151 | 58571772 | 0 | 0    | 0      | A |
| 3 | TIGRP2P46724_rs8570087 | 58586918 | A | 0    | 0      | C |
| 3 | BICF2P819372           | 58601172 | C | 0    | 0      | A |
| 3 | BICF2P129927           | 58610986 | G | 0    | 0      | A |
| 3 | BICF2P62222            | 58626431 | A | 0    | 0      | G |
| 3 | TIGRP2P46734_rs8928293 | 58632821 | 0 | 0    | 0      | A |
| 3 | BICF2S23027784         | 58641206 | A | 0    | 0      | G |
| 3 | TIGRP2P46743_rs8647384 | 58653198 | C | 0    | 0      | A |
| 3 | BICF2P1403991          | 58668741 | A | 0    | 0      | C |
| 3 | BICF2S2323938          | 58687388 | A | 0    | 0      | G |
| 3 | TIGRP2P46766_rs8736150 | 58697770 | A | 0    | 0      | G |
| 3 | TIGRP2P46773_rs9006821 | 58708428 | G | 1    | 1      | A |
| 3 | BICF2P981669           | 58721335 | A | 0    | 0      | G |
| 3 | TIGRP2P46789_rs8952227 | 58731798 | G | 0    | 0      | A |
| 3 | TIGRP2P46798_rs9165444 | 58744477 | C | 1    | 1      | A |
| 3 | TIGRP2P46803_rs8649370 | 58762413 | G | 0.75 | 0.6429 | C |
| 3 | TIGRP2P46811_rs9062999 | 58770543 | A | 0    | 0      | G |
| 3 | BICF2P986395           | 58778231 | 0 | 0    | 0      | A |
| 3 | BICF2S23735412         | 58790438 | A | 0.75 | 0.6429 | G |
| 3 | BICF2P1133363          | 58810862 | A | 0    | 0      | G |
| 3 | TIGRP2P46816_rs8721640 | 58821391 | 0 | 0    | 0      | G |
| 3 | BICF2P436626           | 58823466 | 0 | 0    | 0      | A |
| 3 | TIGRP2P46827_rs9140943 | 58850826 | G | 0.25 | 0.3571 | A |
| 3 | TIGRP2P46844_rs9108296 | 58858407 | G | 0    | 0      | A |
| 3 | BICF2P1228370          | 58889827 | G | 1    | 1      | A |
| 3 | BICF2P356938           | 58900022 | A | 0    | 0      | G |
| 3 | TIGRP2P46860_rs9117118 | 58909774 | A | 1    | 0.75   | G |
| 3 | BICF2P773829           | 58932471 | 0 | 0    | 0      | A |
| 3 | BICF2S22937646         | 58941454 | 0 | 0    | 0      | G |
| 3 | BICF2S22921233         | 58950510 | A | 0    | 0      | G |
| 3 | BICF2P189710           | 58966724 | C | 0.25 | 0.3571 | G |
| 3 | BICF2S23451528         | 58979408 | G | 0.75 | 0.6429 | A |
| 3 | BICF2P556667           | 58989085 | A | 0.25 | 0.3571 | G |
| 3 | BICF2P777999           | 59003457 | G | 0.25 | 0.3571 | A |
| 3 | BICF2S231757           | 59006732 | 0 | 0    | 0      | G |
| 3 | BICF2P634515           | 59023611 | A | 0    | 0      | C |
| 3 | BICF2P601900           | 59029115 | G | 0.75 | 0.6429 | A |
| 3 | TIGRP2P46884_rs8783818 | 59050415 | C | 0    | 0      | A |
| 3 | BICF2P196021           | 59056457 | A | 0.25 | 0.3571 | C |
| 3 | BICF2P461715           | 59059577 | A | 0.75 | 0.6429 | G |
| 3 | BICF2S23443302         | 59080239 | A | 0.75 | 0.6429 | G |
| 3 | TIGRP2P46892_rs8970576 | 59087097 | G | 1    | 1      | A |

|   |                        |          |   |      |        |   |
|---|------------------------|----------|---|------|--------|---|
| 3 | BICF2P651494           | 59088051 | G | 1    | 1      | A |
| 3 | TIGRP2P46905_rs8400984 | 59103745 | G | 0    | 0      | A |
| 3 | TIGRP2P46910_rs9000203 | 59112095 | G | 1    | 1      | A |
| 3 | BICF2P1408506          | 59125981 | 0 | 0    | 0      | C |
| 3 | TIGRP2P46917_rs8997867 | 59143441 | A | 0    | 0      | C |
| 3 | BICF2P765435           | 59147759 | C | 0    | 0      | A |
| 3 | BICF2S23514192         | 59157082 | A | 0    | 0      | G |
| 3 | BICF2P785723           | 59167431 | C | 0    | 0      | G |
| 3 | TIGRP2P46923_rs8759098 | 59178518 | A | 1    | 1      | C |
| 3 | BICF2P940901           | 59181893 | A | 0    | 0      | G |
| 3 | BICF2P193899           | 59194257 | 0 | NA   | NA     | G |
| 3 | TIGRP2P46929_rs8954995 | 59208474 | 0 | 0    | 0      | G |
| 3 | BICF2P125760           | 59217199 | A | 0    | 0      | G |
| 3 | BICF2P733852           | 59243330 | A | 1    | 1      | G |
| 3 | TIGRP2P46946_rs8985656 | 59250889 | G | 1    | 1      | A |
| 3 | BICF2P787031           | 59260229 | G | 1    | 1      | A |
| 3 | BICF2P684926           | 59275200 | G | 0    | 0      | A |
| 3 | BICF2P821692           | 59286924 | A | 0    | 0      | G |
| 3 | BICF2P850771           | 59309684 | G | 1    | 1      | A |
| 3 | TIGRP2P46983_rs8491385 | 59314616 | A | 0    | 0      | C |
| 3 | TIGRP2P46995_rs8491372 | 59317142 | A | 0    | 0      | G |
| 3 | BICF2S23742412         | 59336756 | A | 1    | 1      | T |
| 3 | BICF2S22941239         | 59349290 | A | 0    | 0      | G |
| 3 | BICF2S22941992         | 59353168 | A | 0    | 0      | G |
| 3 | BICF2P421085           | 59373975 | 0 | 0    | 0      | G |
| 3 | TIGRP2P47006_rs9026135 | 59378598 | A | 0    | 0      | G |
| 3 | BICF2P769122           | 59390065 | A | 1    | 1      | C |
| 3 | TIGRP2P47014_rs9092365 | 59399260 | G | 0    | 0      | C |
| 3 | BICF2P162635           | 59409601 | A | 0    | 0      | G |
| 3 | TIGRP2P47035_rs8530261 | 59428338 | A | 0    | 0      | G |
| 3 | BICF2P1126601          | 59435837 | A | 0    | 0      | G |
| 3 | BICF2S23150351         | 59444529 | A | 0.25 | 0.25   | G |
| 3 | BICF2P1369136          | 59455414 | G | 0    | 0      | A |
| 3 | BICF2P1394756          | 59472814 | A | 0    | 0      | G |
| 3 | BICF2S23126274         | 59481536 | A | 0.25 | 0.2857 | C |
| 3 | BICF2S23139063         | 59490371 | G | 0.25 | 0.2857 | A |
| 3 | TIGRP2P47078_rs9243047 | 59492660 | C | 0    | 0      | A |
| 3 | BICF2P638159           | 59502464 | A | 0    | 0      | G |
| 3 | BICF2P514286           | 59520794 | A | 0    | 0      | G |
| 3 | TIGRP2P47114_rs8854693 | 59530227 | A | 0    | 0      | G |
| 3 | BICF2P911926           | 59535500 | G | 0    | 0      | A |
| 3 | BICF2S23618562         | 59537372 | A | 0    | 0      | G |
| 3 | BICF2P560719           | 59541140 | A | 0    | 0      | C |
| 3 | BICF2P335633           | 59541960 | A | 0    | 0      | G |
| 3 | BICF2P399512           | 59547401 | A | 0    | 0      | C |
| 3 | BICF2P547573           | 59559495 | G | 0    | 0      | A |
| 3 | BICF2P1189190          | 59570345 | A | 0    | 0      | G |



|   |                        |          |   |      |        |   |
|---|------------------------|----------|---|------|--------|---|
| 3 | TIGRP2P47159_rs9182961 | 59582169 | A | 0    | 0      | C |
| 3 | BICF2P25895            | 59594734 | A | 0.75 | 0.7143 | G |
| 3 | TIGRP2P47184_rs8650949 | 59619158 | G | 0.75 | 0.7143 | A |
| 3 | BICF2P614740           | 59631071 | A | 0    | 0      | G |
| 3 | BICF2P934354           | 59644944 | A | 0    | 0      | G |
| 3 | BICF2P576162           | 59651227 | G | 0.75 | 0.7143 | A |
| 3 | BICF2P662354           | 59672947 | C | 0.25 | 0.2857 | A |
| 3 | TIGRP2P47208_rs9018581 | 59680429 | A | 0.75 | 0.7143 | G |
| 3 | TIGRP2P47213_rs8835960 | 59686810 | 0 | 0    | 0      | A |
| 3 | TIGRP2P47215_rs9082321 | 59699010 | A | 0    | 0      | G |
| 3 | BICF2S23435950         | 59708155 | A | 0    | 0      | C |
| 3 | BICF2S22928638         | 59741389 | A | 0    | 0      | C |
| 3 | BICF2S23746058         | 59762534 | G | 0.75 | 0.7143 | A |
| 3 | BICF2P1431115          | 59783388 | A | 0    | 0      | G |
| 3 | BICF2P971579           | 59797380 | 0 | 0    | 0      | G |
| 3 | BICF2P1272708          | 59803931 | A | 0.25 | 0.25   | G |
| 3 | BICF2S23759490         | 59823094 | A | 0.25 | 0.2857 | C |
| 3 | BICF2P496493           | 59844575 | G | 0    | 0      | A |
| 3 | BICF2S23543323         | 59846839 | A | 0    | 0      | G |
| 3 | TIGRP2P47247_rs9018900 | 59857899 | C | 0    | 0.2857 | A |
| 3 | BICF2P1339336          | 59876105 | A | 0    | 0      | G |
| 3 | BICF2P348925           | 59894803 | A | 0    | 0      | G |
| 3 | BICF2S23617348         | 59903982 | A | 0    | 0      | G |
| 3 | BICF2P933112           | 59942762 | A | 0    | 0      | G |
| 3 | BICF2P126084           | 59951421 | G | 0.25 | 0.2857 | A |
| 3 | BICF2P840702           | 59964791 | A | 0.25 | 0.2857 | G |
| 3 | BICF2P761632           | 59981619 | C | 0.25 | 0.2857 | A |
| 3 | BICF2S24319510         | 59985773 | G | 0.25 | 0.2857 | A |
| 3 | BICF2P1390607          | 59988696 | A | 0.25 | 0.2857 | G |
| 3 | BICF2P498967           | 60023127 | A | 1    | 1      | G |
| 3 | BICF2S2394890          | 60037359 | G | 0    | 0      | A |
| 3 | BICF2P816673           | 60042969 | 0 | 0    | 0      | C |
| 3 | BICF2S23257459         | 60060890 | A | 0.5  | 0.6429 | C |
| 3 | BICF2P136222           | 60070811 | G | 0.25 | 0.3571 | A |
| 3 | BICF2S2363134          | 60083608 | A | 0.25 | 0.2857 | G |
| 3 | BICF2S23146792         | 60089029 | A | 0.75 | 0.6667 | G |
| 3 | TIGRP2P47272_rs9158027 | 60103103 | G | 0.25 | 0.2857 | A |
| 3 | BICF2P1200174          | 60118737 | A | 0.75 | 0.6429 | G |
| 3 | BICF2S23318290         | 60125716 | C | 0.75 | 0.6429 | A |
| 3 | BICF2S23235862         | 60139595 | A | 0    | 0      | G |
| 3 | BICF2P493969           | 60150677 | A | 0    | 0      | G |
| 3 | BICF2P1132727          | 60156223 | A | NA   | 0      | T |
| 3 | BICF2P949897           | 60167287 | A | 0.75 | 0.7143 | G |
| 3 | BICF2S23025102         | 60171151 | A | 0.75 | 0.7143 | G |
| 3 | BICF2S23710268         | 60183356 | A | 0.75 | 0.7143 | G |
| 3 | TIGRP2P47329_rs9158777 | 60195187 | A | 0    | 0.3    | G |
| 3 | TIGRP2P47339_rs8853618 | 60208301 | A | 0    | 0      | G |

|   |                        |          |   |      |        |   |
|---|------------------------|----------|---|------|--------|---|
| 3 | BICF2P1071075          | 60214565 | A | 1    | 1      | G |
| 3 | TIGRP2P47346_rs8741608 | 60233742 | 0 | 0    | 0      | A |
| 3 | BICF2S23118161         | 60241529 | A | 0    | 0      | G |
| 3 | BICF2P750212           | 60257942 | G | 0    | 0      | A |
| 3 | BICF2P535866           | 60260695 | G | 0    | 0      | A |
| 3 | BICF2P1497831          | 60275491 | A | 0    | 0      | G |
| 3 | BICF2P584984           | 60293870 | A | 0    | 0      | G |
| 3 | BICF2P391848           | 60298984 | A | 0.25 | 0.2857 | G |
| 3 | BICF2P967467           | 60325835 | G | 0    | 0      | A |
| 3 | BICF2G630342052        | 60345668 | G | 0.25 | 0.2857 | A |
| 3 | BICF2G630342090        | 60370566 | A | 0.75 | 0.7143 | C |
| 3 | TIGRP2P47392_rs8934440 | 60373918 | G | 0.75 | 0.75   | A |
| 3 | BICF2P771848           | 60384820 | A | 0    | 0      | G |
| 3 | BICF2G630342165        | 60398515 | C | 0    | 0      | G |
| 3 | BICF2G630342183        | 60420517 | A | 0.5  | 0.6429 | G |
| 3 | BICF2G630342188        | 60421975 | A | 0    | 0      | G |
| 3 | BICF2G630342219        | 60440275 | C | 0    | 0      | G |
| 3 | BICF2S23530561         | 60454547 | G | 0    | 0      | A |
| 3 | BICF2G630342233        | 60456877 | A | 0    | 0      | G |
| 3 | BICF2P569275           | 60471309 | A | 0    | 0      | G |
| 3 | BICF2G630342252        | 60485857 | G | 0.5  | 0.3571 | A |
| 3 | BICF2S23730892         | 60491423 | G | 0.5  | 0.3571 | A |
| 3 | BICF2S23044035         | 60502892 | A | 0    | 0      | G |
| 3 | BICF2G630342289        | 60515050 | G | 0    | 0      | A |
| 3 | BICF2G630342295        | 60523425 | A | 0.5  | 0.3333 | C |
| 3 | BICF2G630342302        | 60529664 | A | 0    | 0      | G |
| 3 | BICF2G630342305        | 60546469 | G | 0    | 0      | C |
| 3 | BICF2G630342306        | 60548700 | C | 0.5  | 0.3571 | A |
| 3 | BICF2S23014069         | 60576604 | G | 0.5  | 0.6429 | A |
| 3 | BICF2G630342317        | 60585949 | A | 0.25 | 0.3333 | C |
| 3 | BICF2G630342336        | 60604161 | G | 0.25 | 0.2857 | A |
| 3 | BICF2S23220772         | 60605108 | A | 0.25 | 0.3571 | G |
| 3 | BICF2G630342348        | 60622432 | A | 0    | 0      | G |
| 3 | BICF2G630342351        | 60631260 | A | 0    | 0      | G |
| 3 | BICF2G630342358        | 60640066 | A | 0    | 0      | G |
| 3 | BICF2G630342412        | 60667409 | 0 | 0    | 0      | A |
| 3 | BICF2S2296229          | 60676983 | G | 0.75 | 0.6429 | A |
| 3 | BICF2G630342454        | 60690584 | A | 0    | 0      | G |
| 3 | BICF2G630342477        | 60703323 | A | 0.25 | 0.3571 | G |
| 3 | BICF2P1181576          | 60713511 | A | 0.25 | 0.3571 | G |
| 3 | TIGRP2P47472_rs8732868 | 60730652 | A | 0.75 | 0.6429 | G |
| 3 | BICF2S2323000          | 60737421 | G | 0.25 | 0.3571 | A |
| 3 | BICF2G630342485        | 60753407 | G | 0.5  | 0.6429 | A |
| 3 | BICF2G630342493        | 60756920 | G | 0.5  | 0.6429 | A |
| 3 | BICF2G630342532        | 60770724 | A | 0    | 0      | G |
| 3 | TIGRP2P47485_rs9021276 | 60777791 | A | 0.25 | 0.3571 | G |
| 3 | BICF2P902281           | 60793181 | T | 0.25 | 0.2857 | A |

|   |                        |          |   |      |        |   |
|---|------------------------|----------|---|------|--------|---|
| 3 | BICF2S23638610         | 60820280 | A | 0.5  | 0.3571 | C |
| 3 | BICF2S23640598         | 60825061 | C | 0.5  | 0.3571 | G |
| 3 | BICF2S23424250         | 60835993 | 0 | 0    | 0      | G |
| 3 | TIGRP2P47572_rs8743751 | 60855498 | 0 | 0    | 0      | G |
| 3 | BICF2P692658           | 60860668 | A | 0    | 0      | G |
| 3 | TIGRP2P47591_rs8580523 | 60870855 | A | 0.75 | 0.7143 | G |
| 3 | BICF2P522022           | 60888002 | A | 0    | 0      | C |
| 3 | BICF2G630342581        | 60907813 | A | 0.25 | 0.2857 | G |
| 3 | BICF2S2356938          | 60918350 | A | 0    | 0      | G |
| 3 | BICF2P980477           | 60931147 | A | 0    | 0      | G |
| 3 | BICF2P994346           | 60938941 | A | 0.75 | 0.6429 | G |
| 3 | BICF2G630342603        | 60959181 | A | 0.75 | 0.7143 | G |
| 3 | BICF2G630342623        | 60978779 | G | 0    | 0      | C |
| 3 | BICF2P465702           | 60993461 | G | 0.25 | 0.2857 | A |
| 3 | BICF2P635067           | 61006592 | A | 0.25 | 0.2857 | G |
| 3 | BICF2P805788           | 61008633 | G | 0.25 | 0.2857 | A |
| 3 | BICF2G630342638        | 61019969 | C | 0.25 | 0.3571 | A |
| 3 | BICF2S23622583         | 61035357 | A | 0    | 0      | G |
| 3 | TIGRP2P47676_rs9005554 | 61043109 | C | 0.25 | 0.2857 | A |
| 3 | BICF2P307990           | 61056570 | A | 0.5  | 0.3333 | G |
| 3 | BICF2P1043648          | 61069111 | A | 0.5  | 0.3571 | G |
| 3 | BICF2P1350378          | 61081502 | A | 0.5  | 0.3571 | G |
| 3 | BICF2P1184966          | 61094841 | A | 0.5  | 0.3571 | G |
| 3 | BICF2G630342723        | 61098781 | G | 0.75 | 0.7143 | A |
| 3 | BICF2G630342725        | 61100529 | G | 0.75 | 0.7143 | A |
| 3 | BICF2G630342748        | 61114920 | A | 0.25 | 0.3333 | G |
| 3 | BICF2P563518           | 61129840 | A | 0.25 | 0.2857 | C |
| 3 | BICF2G630342760        | 61144242 | A | 0.25 | 0.3571 | G |
| 3 | BICF2G630342761        | 61145506 | A | 0.25 | 0.2857 | G |
| 3 | BICF2P314519           | 61157377 | G | 0.5  | 0.3571 | A |
| 3 | TIGRP2P47728_rs8789067 | 61169833 | G | 0.25 | 0.3571 | A |
| 3 | TIGRP2P47734_rs8806656 | 61189901 | G | 0.5  | 0.6429 | A |
| 3 | TIGRP2P47735_rs8576948 | 61191986 | G | 0.5  | 0.6429 | A |
| 3 | BICF2S23433128         | 61210371 | A | 0    | 0      | G |
| 3 | BICF2P92856            | 61216493 | 0 | 0    | 0      | C |
| 3 | BICF2P998351           | 61244168 | G | 0.75 | 0.7143 | A |
| 3 | BICF2S2347901          | 61244760 | G | 0.25 | 0.2857 | A |
| 3 | BICF2S23644773         | 61251198 | A | 0    | 0      | C |
| 3 | TIGRP2P47760_rs8836179 | 61270159 | A | 0    | 0      | G |
| 3 | TIGRP2P47768_rs8503847 | 61280513 | A | 0    | 0      | G |
| 3 | TIGRP2P47772_rs9100052 | 61291200 | 0 | 0    | 0      | A |
| 3 | BICF2G630342799        | 61291248 | A | 0    | 0      | G |
| 3 | TIGRP2P47781_rs8936167 | 61309396 | C | 0    | 0      | A |
| 3 | BICF2S23233804         | 61335961 | A | 0    | 0      | G |
| 3 | BICF2S23614175         | 61342394 | C | 0    | 0      | A |
| 3 | BICF2P1299301          | 61364783 | 0 | 0    | 0      | G |
| 3 | TIGRP2P47807_rs8917856 | 61376409 | G | 0.75 | 0.7143 | A |

|   |                        |          |   |      |        |   |
|---|------------------------|----------|---|------|--------|---|
| 3 | BICF2P265077           | 61387207 | G | 0.75 | 0.7143 | A |
| 3 | BICF2G630342818        | 61407825 | G | 0.75 | 0.7143 | A |
| 3 | BICF2G630342831        | 61411604 | G | 0    | 0      | A |
| 3 | BICF2G630342862        | 61442748 | G | 0    | 0      | A |
| 3 | BICF2G630342901        | 61465893 | A | 0    | 0      | C |
| 3 | BICF2G630342913        | 61469967 | G | 0.5  | 0.3    | A |
| 3 | BICF2S23129486         | 61495568 | 0 | 0    | 0      | G |
| 3 | BICF2G630342935        | 61513470 | G | 0.5  | 0.3571 | A |
| 3 | BICF2G630342937        | 61516442 | A | 0.5  | 0.3571 | G |
| 3 | BICF2G630342954        | 61525785 | G | 0.5  | 0.3571 | A |
| 3 | TIGRP2P47893_rs8483655 | 61540437 | 0 | 0    | 0      | G |
| 3 | BICF2G630343024        | 61554384 | A | 0    | 0      | G |
| 3 | BICF2G630343035        | 61560534 | G | 0.5  | 0.4    | A |
| 3 | BICF2G630343046        | 61582117 | A | 0    | 0      | G |
| 3 | BICF2G630343050        | 61586653 | A | 0    | 0      | G |
| 3 | BICF2G630343081        | 61602001 | C | 0.5  | 0.3571 | G |
| 3 | BICF2P994384           | 61622980 | C | 0    | 0      | A |
| 3 | BICF2G630343094        | 61643221 | A | 0    | 0      | G |
| 3 | BICF2G630343100        | 61656590 | A | 0    | 0      | G |
| 3 | BICF2G630343111        | 61669551 | A | 0    | 0      | G |
| 3 | TIGRP2P47930_rs8546918 | 61692080 | A | 0.5  | 0.3571 | G |
| 3 | BICF2G630343137        | 61698622 | A | 0    | 0      | G |
| 3 | BICF2G630343144        | 61714946 | A | 0    | 0      | G |
| 3 | BICF2P956917           | 61722723 | 0 | 0    | 0      | G |
| 3 | BICF2P795021           | 61736406 | A | 0    | 0      | G |
| 3 | BICF2G630343157        | 61746899 | G | 0    | 0      | A |
| 3 | BICF2G630343177        | 61764408 | A | 0    | 0      | G |
| 3 | BICF2G630343195        | 61776444 | C | 0    | 0      | G |
| 3 | BICF2G630343199        | 61778381 | A | 0    | 0      | G |
| 3 | BICF2G630343201        | 61782194 | A | 0    | 0      | G |
| 3 | BICF2G630343209        | 61796167 | A | 0    | 0      | G |
| 3 | BICF2G630343218        | 61811149 | G | 0    | 0      | A |
| 3 | BICF2G630343227        | 61821320 | T | 0.25 | 0.3571 | A |
| 3 | BICF2G630343236        | 61822884 | A | 0    | 0      | T |
| 3 | BICF2G630343238        | 61823388 | G | 0    | 0      | A |
| 3 | BICF2P828618           | 61827150 | A | 0    | 0      | G |
| 3 | BICF2S22947559         | 61835833 | C | 0.25 | 0.3571 | A |
| 3 | BICF2G630343268        | 61850471 | G | 0    | 0      | A |
| 3 | BICF2G630343282        | 61860018 | A | 0.25 | 0.3571 | G |
| 3 | BICF2G630343289        | 61872666 | G | 0    | 0      | A |
| 3 | BICF2G630343296        | 61890193 | A | 0    | 0      | G |
| 3 | BICF2G630343300        | 61897429 | A | 0    | 0      | G |
| 3 | BICF2G630343306        | 61911022 | A | 0    | 0      | G |
| 3 | BICF2S2294724          | 61919106 | A | 1    | 1      | G |
| 3 | BICF2G630343315        | 61934362 | A | 0.75 | 0.6429 | G |
| 3 | TIGRP2P47976_rs9096075 | 61940175 | G | 0.25 | 0.3571 | A |
| 3 | BICF2P1408957          | 61950120 | A | 0.25 | 0.3571 | C |

|   |                 |          |   |      |        |   |
|---|-----------------|----------|---|------|--------|---|
| 3 | BICF2G630343318 | 61950224 | A | 0.5  | 0.3571 | G |
| 3 | BICF2G630343320 | 61953173 | G | 0    | 0      | A |
| 3 | BICF2G630343347 | 61963797 | G | 0.5  | 0.3571 | A |
| 3 | BICF2G630343376 | 61974633 | A | 0    | 0      | G |
| 3 | BICF2G630343398 | 61993311 | A | 0    | 0      | G |
| 3 | BICF2G630343405 | 62004113 | A | 0.5  | 0.3571 | G |
| 3 | BICF2G630343442 | 62019762 | A | 0.5  | 0.3571 | C |
| 3 | BICF2P257151    | 62039179 | G | 0    | 0      | A |
| 3 | BICF2G630343507 | 62044082 | G | 0    | 0      | A |
| 3 | BICF2G630343520 | 62055114 | G | 0.25 | 0.3571 | A |
| 3 | BICF2S23535584  | 62073789 | G | 0.25 | 0.3571 | A |
| 3 | BICF2P675684    | 62096654 | A | 0.5  | 0.6429 | G |
| 3 | BICF2P629597    | 62100238 | G | 0.5  | 0.6429 | A |
| 3 | BICF2P603949    | 62113880 | A | 0.5  | 0.6429 | C |
| 3 | BICF2P753151    | 62123479 | A | 0.5  | 0.3571 | G |
| 3 | BICF2G630343527 | 62136587 | A | 0.25 | 0.3571 | T |
| 3 | BICF2S23435649  | 62155441 | A | 0    | 0      | G |
| 3 | BICF2S22951698  | 62163778 | C | 0.25 | 0.2857 | A |
| 3 | BICF2G630343593 | 62174589 | A | 0.25 | 0.2857 | C |
| 3 | BICF2G630343615 | 62190638 | G | 0.25 | 0.2857 | A |
| 3 | BICF2G630343620 | 62199806 | A | 0.5  | 0.3571 | G |
| 3 | BICF2G630343629 | 62211510 | G | 0.5  | 0.3571 | A |
| 3 | BICF2G630343631 | 62215007 | G | 0.5  | 0.3571 | A |
| 3 | BICF2G630343656 | 62231357 | A | 0.5  | 0.6429 | T |
| 3 | BICF2G630343663 | 62242138 | G | 1    | 1      | C |
| 3 | BICF2G630343682 | 62256541 | A | 0    | 0      | G |
| 3 | BICF2G630343705 | 62261524 | A | 1    | 1      | G |
| 3 | BICF2G630343752 | 62273572 | C | 0.5  | 0.3571 | A |
| 3 | BICF2S23411121  | 62288923 | A | 0.75 | 0.6429 | G |
| 3 | BICF2P1379972   | 62296064 | 0 | 0    | 0      | A |
| 3 | BICF2P664615    | 62314635 | A | 0    | 0      | G |
| 3 | BICF2P772349    | 62323843 | A | 0    | 0      | G |
| 3 | BICF2S23539139  | 62330170 | G | 0.25 | 0.3571 | A |
| 3 | BICF2P756351    | 62344818 | A | 0.5  | 0.3571 | G |
| 3 | BICF2G630343787 | 62347679 | A | 0.75 | 0.6429 | G |
| 3 | BICF2S2344954   | 62355008 | A | 0.5  | 0.3571 | G |
| 3 | BICF2P778641    | 62365653 | G | 0.5  | 0.3571 | A |
| 3 | BICF2G630343819 | 62371768 | A | 0.25 | 0.2857 | G |
| 3 | BICF2G630343824 | 62380582 | C | 0    | 0      | A |
| 3 | BICF2G630343860 | 62391789 | A | 0    | 0      | G |
| 3 | BICF2G630343874 | 62399676 | A | 0.25 | 0.2857 | T |
| 3 | BICF2G630343901 | 62417619 | A | 0.25 | 0.3571 | G |
| 3 | BICF2S23019370  | 62422987 | G | 0.5  | 0.6429 | A |
| 3 | BICF2S2297194   | 62441438 | G | 0.25 | 0.2857 | A |
| 3 | BICF2P572151    | 62449519 | A | 0.25 | 0.2857 | G |
| 3 | BICF2P331789    | 62457327 | G | 1    | 1      | A |
| 3 | BICF2P275180    | 62472245 | A | 1    | 1      | G |

|   |                        |          |   |      |        |   |
|---|------------------------|----------|---|------|--------|---|
| 3 | BICF2P33688            | 62481096 | A | 0.25 | 0.2857 | G |
| 3 | BICF2P797226           | 62492861 | A | 0.25 | 0.2857 | G |
| 3 | TIGRP2P48207_rs8761162 | 62507510 | A | 0.75 | 0.7143 | G |
| 3 | BICF2P690343           | 62516337 | A | 0    | 0      | G |
| 3 | BICF2P202126           | 62526346 | G | 0.25 | 0.2857 | A |
| 3 | BICF2G630343911        | 62539350 | G | 0    | 0      | A |
| 3 | BICF2P716326           | 62551278 | A | 0.75 | 0.6429 | G |
| 3 | BICF2G630343957        | 62566321 | A | 0.25 | 0.3571 | C |
| 3 | BICF2P1137642          | 62577854 | G | 0    | 0      | A |
| 3 | BICF2P751285           | 62592273 | A | 0    | 0      | G |
| 3 | TIGRP2P48249_rs9077671 | 62599963 | G | 0    | 0      | A |
| 3 | BICF2G630344005        | 62612669 | A | 0.25 | 0.3571 | G |
| 3 | BICF2G630344018        | 62624404 | A | 0    | 0      | G |
| 3 | BICF2G630344019        | 62625087 | A | 0    | 0      | G |
| 3 | BICF2P1138157          | 62634378 | A | 0.5  | 0.6429 | G |
| 3 | TIGRP2P48255_rs9059761 | 62651265 | 0 | 0    | 0      | G |
| 3 | BICF2G630344050        | 62661742 | A | 0.5  | 0.6429 | C |
| 3 | BICF2S23659655         | 62670368 | A | 0.75 | 0.7143 | G |
| 3 | BICF2G630344069        | 62679327 | A | 0    | 0      | G |
| 3 | BICF2G630344078        | 62688040 | A | 0.25 | 0.2857 | G |
| 3 | BICF2P439860           | 62704095 | A | 0.75 | 0.7143 | C |
| 3 | BICF2G630344104        | 62705734 | A | 0.25 | 0.3571 | G |
| 3 | TIGRP2P48277_rs8579528 | 62711121 | A | 0.5  | 0.3571 | C |
| 3 | BICF2P1352497          | 62725738 | A | 0    | 0      | G |
| 3 | BICF2P423242           | 62733600 | G | 0    | 0      | A |
| 3 | TIGRP2P48312_rs8703374 | 62751020 | 0 | 0    | 0      | C |
| 3 | BICF2G630344171        | 62766706 | G | 0.5  | 0.3571 | A |
| 3 | BICF2P394142           | 62775318 | A | 0    | 0      | G |
| 3 | BICF2P724879           | 62778400 | G | 0    | 0      | A |
| 3 | BICF2P724891           | 62780161 | A | 0    | 0      | G |
| 3 | TIGRP2P48361_rs8664040 | 62792396 | A | 0    | 0      | G |
| 3 | BICF2P1285989          | 62804560 | G | 0.5  | 0.3571 | A |
| 3 | BICF2G630344210        | 62815972 | G | 0.75 | 0.7857 | A |
| 3 | BICF2G630344249        | 62830323 | A | 0    | 0      | G |
| 3 | BICF2P36500            | 62850765 | C | 0    | 0      | A |
| 3 | BICF2S23528080         | 62864057 | A | 0.75 | 0.5714 | G |
| 3 | BICF2S23025030         | 62876620 | G | 0    | 0      | A |
| 3 | BICF2P1284604          | 62877415 | G | 0    | 0      | A |
| 3 | BICF2P310822           | 62893465 | 0 | 0    | 0      | G |
| 3 | BICF2P310823           | 62894273 | A | 0.25 | 0.2143 | G |
| 3 | BICF2P852798           | 62904883 | A | 0    | 0      | G |
| 3 | BICF2G630344296        | 62925469 | A | 0    | 0      | C |
| 3 | BICF2G630344299        | 62928679 | G | 0.25 | 0.4286 | A |
| 3 | BICF2G630344324        | 62938727 | A | 0    | 0      | G |
| 3 | BICF2G630344330        | 62945847 | A | 0    | 0      | C |
| 3 | BICF2G630344343        | 62951807 | A | 0    | 0      | G |
| 3 | BICF2G630344371        | 62968609 | A | 0    | 0      | G |

|   |                        |          |   |      |        |   |
|---|------------------------|----------|---|------|--------|---|
| 3 | BICF2G630344389        | 62981499 | G | 0    | 0      | A |
| 3 | BICF2G630344410        | 62985536 | G | 0    | 0      | A |
| 3 | BICF2G630344441        | 63000129 | G | 0.75 | 0.7857 | A |
| 3 | BICF2P874613           | 63014606 | 0 | 0    | 0      | C |
| 3 | BICF2G630344491        | 63026180 | A | 0.25 | 0.4286 | T |
| 3 | BICF2S23160787         | 63042676 | A | 0.5  | 0.6429 | G |
| 3 | BICF2P920025           | 63044344 | A | 0.25 | 0.2143 | G |
| 3 | BICF2P467364           | 63058894 | A | 0.25 | 0.2143 | G |
| 3 | BICF2S23251871         | 63065087 | A | 0    | 0      | G |
| 3 | BICF2P980846           | 63074953 | A | 0.25 | 0.4286 | G |
| 3 | BICF2S23245766         | 63082816 | A | 0    | 0      | G |
| 3 | BICF2S23758385         | 63087817 | A | 0.25 | 0.1667 | G |
| 3 | BICF2P1458660          | 63090355 | A | 0.25 | 0.4286 | C |
| 3 | BICF2P133062           | 63101353 | A | 0    | 0      | G |
| 3 | BICF2P625063           | 63117855 | G | 0.25 | 0.2143 | A |
| 3 | TIGRP2P48552_rs8535624 | 63134021 | A | 0    | 0      | G |
| 3 | TIGRP2P48556_rs8535625 | 63135741 | A | 0    | 0      | C |
| 3 | BICF2G630344508        | 63148652 | A | 0    | 0      | G |
| 3 | BICF2G630344522        | 63168062 | A | 0.75 | 0.7857 | G |
| 3 | BICF2G630344525        | 63169634 | G | 0.75 | 0.7857 | A |
| 3 | BICF2G630344562        | 63182153 | A | 0    | 0      | G |
| 3 | BICF2G630344575        | 63196234 | G | 0    | 0      | A |
| 3 | BICF2S23320076         | 63202177 | G | 0    | 0      | A |
| 3 | BICF2P913696           | 63209002 | A | 1    | 1      | C |
| 3 | BICF2G630344606        | 63223013 | A | 0    | 0      | G |
| 3 | BICF2G630344617        | 63228310 | G | 0    | 0      | A |
| 3 | BICF2G630344656        | 63245413 | G | 0.5  | 0.3571 | A |
| 3 | BICF2G630344667        | 63250714 | A | 0.25 | 0.2143 | G |
| 3 | BICF2P953182           | 63255964 | A | 0.5  | 0.3571 | G |
| 3 | BICF2S2303353          | 63258859 | A | 0.25 | 0.2143 | C |
| 3 | BICF2P767422           | 63268838 | A | 0.25 | 0.2143 | G |
| 3 | BICF2G630344670        | 63274295 | A | 0    | 0      | G |
| 3 | TIGRP2P48590_rs9099015 | 63289377 | A | 0.25 | 0.2143 | G |
| 3 | BICF2G630344694        | 63304512 | G | 0    | 0      | A |
| 3 | BICF2G630344701        | 63311225 | A | 0.25 | 0.2143 | G |
| 3 | BICF2G630344715        | 63322119 | G | 0    | 0      | A |
| 3 | BICF2S23333400         | 63341213 | A | 0    | 0      | G |
| 3 | BICF2P664975           | 63345328 | A | 0.75 | 0.5714 | G |
| 3 | BICF2G630344724        | 63356045 | A | 0    | 0      | G |
| 3 | BICF2P1322888          | 63368010 | A | 0    | 0      | G |
| 3 | BICF2G630344739        | 63382691 | G | 0    | 0      | A |
| 3 | BICF2G630344751        | 63401319 | 0 | 0    | 0      | G |
| 3 | BICF2G630344768        | 63419783 | 0 | 0    | 0      | G |
| 3 | TIGRP2P48652_rs8688145 | 63425495 | A | 0.5  | 0.3571 | G |
| 3 | BICF2P705264           | 63435649 | C | 0    | 0      | A |
| 3 | BICF2P1103910          | 63448348 | A | 0    | 0      | G |
| 3 | BICF2P306560           | 63449859 | A | 0    | 0      | G |

|   |                        |          |   |      |        |   |
|---|------------------------|----------|---|------|--------|---|
| 3 | BICF2G630344776        | 63459071 | A | 0    | 0      | G |
| 3 | BICF2S23352016         | 63471330 | A | 0    | 0      | G |
| 3 | BICF2S23114047         | 63484442 | A | 0    | 0      | G |
| 3 | BICF2S23147827         | 63491641 | G | 0.5  | 0.3571 | A |
| 3 | BICF2P1395947          | 63505875 | A | 0    | 0      | C |
| 3 | TIGRP2P48699_rs8545474 | 63515105 | G | 0.75 | 0.7857 | A |
| 3 | BICF2S2327843          | 63527033 | A | 0    | 0.1429 | G |
| 3 | BICF2P589335           | 63533946 | A | 0    | 0      | G |
| 3 | BICF2P310837           | 63540221 | A | 0.25 | 0.4286 | G |
| 3 | BICF2S23212481         | 63558969 | A | 0    | 0.1429 | G |
| 3 | BICF2P1079764          | 63578412 | G | 0.75 | 0.7857 | A |
| 3 | BICF2P764626           | 63584918 | A | 0    | 0      | G |
| 3 | TIGRP2P48745_rs8936838 | 63600690 | A | 0    | 0.1429 | G |
| 3 | BICF2G630344816        | 63614805 | G | 0.25 | 0.2143 | A |
| 3 | BICF2P1231012          | 63618387 | A | 0    | 0      | G |
| 3 | TIGRP2P48762_rs9049599 | 63637131 | A | 0    | 0      | G |
| 3 | TIGRP2P48765_rs8876448 | 63641191 | G | 0.25 | 0.2857 | A |
| 3 | BICF2P584373           | 63660589 | 0 | 0    | 0      | C |
| 3 | TIGRP2P48774_rs8910077 | 63667614 | A | 0    | 0      | G |
| 3 | TIGRP2P48779_rs9090811 | 63680486 | C | 0    | 0      | A |
| 3 | BICF2P964958           | 63693565 | A | 0.5  | 0.3571 | G |
| 3 | BICF2P1069954          | 63704137 | 0 | 0    | 0      | T |
| 3 | BICF2P648863           | 63712849 | A | 0.25 | 0.2857 | G |
| 3 | BICF2P1239561          | 63725438 | A | 0    | 0      | C |
| 3 | BICF2P1140868          | 63740054 | G | 0.25 | 0.4286 | A |
| 3 | BICF2P1275566          | 63747674 | 0 | 0    | 0      | C |
| 3 | BICF2P1364100          | 63757754 | A | 0.25 | 0.4286 | G |
| 3 | BICF2P1393158          | 63776598 | G | 0.25 | 0.4286 | A |
| 3 | TIGRP2P48834_rs8776478 | 63791062 | A | 0.25 | 0.4    | G |
| 3 | BICF2S23658886         | 63805753 | A | 0.25 | 0.2857 | G |
| 3 | BICF2S23647186         | 63823062 | A | 0    | 0      | G |
| 3 | TIGRP2P48843_rs9241977 | 63829220 | A | 0    | 0      | C |
| 3 | BICF2P751737           | 63841073 | A | 0    | 0      | G |
| 3 | BICF2P936646           | 63852457 | G | 0.25 | 0.2857 | A |
| 3 | TIGRP2P48854_rs9248837 | 63858405 | A | 0    | 0      | G |
| 3 | BICF2P654531           | 63860805 | G | 0.75 | 0.5714 | C |
| 3 | TIGRP2P48876_rs8791684 | 63875363 | A | 0    | 0      | G |
| 3 | TIGRP2P48879_rs9084938 | 63882531 | C | 0    | 0      | A |
| 3 | BICF2P562884           | 63907288 | G | 0.75 | 0.5714 | A |
| 3 | BICF2P1347925          | 63918740 | G | 0    | 0      | A |
| 3 | BICF2P28563            | 63941417 | A | 0    | 0      | G |
| 3 | BICF2P621451           | 63952085 | A | 0.25 | 0.4286 | G |
| 3 | BICF2S23628019         | 63965444 | G | 0.25 | 0.2857 | C |
| 3 | TIGRP2P48892_rs9062439 | 63975320 | A | 0    | 0      | T |
| 3 | BICF2P787746           | 63989974 | 0 | 0    | 0      | G |
| 3 | BICF2P1468862          | 64006757 | G | 0    | 0      | A |
| 3 | TIGRP2P48895_rs9035989 | 64013828 | A | 0    | 0      | G |



|   |                        |          |   |      |        |   |
|---|------------------------|----------|---|------|--------|---|
| 3 | BICF2S23423111         | 64029682 | 0 | 0    | 0      | G |
| 3 | BICF2P1417016          | 64039970 | A | 0    | 0      | G |
| 3 | BICF2P435692           | 64051789 | G | 0.25 | 0.2857 | C |
| 3 | BICF2P565225           | 64053888 | G | 0.75 | 0.7857 | A |
| 3 | BICF2P256279           | 64058087 | A | 0.75 | 0.7857 | G |
| 3 | BICF2P100021           | 64071242 | 0 | 0    | 0      | G |
| 3 | BICF2P88342            | 64082134 | G | 0.75 | 0.7857 | A |
| 3 | BICF2S23147347         | 64100410 | A | 0.5  | 0.3571 | G |
| 3 | BICF2S23019603         | 64121948 | A | 0.5  | 0.3571 | G |
| 3 | BICF2P247653           | 64127047 | A | 0.25 | 0.2857 | G |
| 3 | BICF2P1024218          | 64135951 | G | 0.75 | 0.7857 | A |
| 3 | TIGRP2P48916_rs8937700 | 64148415 | G | 0.25 | 0.2857 | A |
| 3 | BICF2P174683           | 64161002 | C | NA   | NA     | A |
| 3 | BICF2S23037111         | 64170680 | A | 0    | 0.1429 | G |
| 3 | TIGRP2P48923_rs9082981 | 64181840 | C | 0    | 0.1429 | A |
| 3 | BICF2P515              | 64195515 | A | 0    | 0      | C |
| 3 | BICF2P301639           | 64205016 | A | 0    | 0      | G |
| 3 | TIGRP2P48928_rs9231399 | 64218794 | G | 0    | 0      | A |
| 3 | BICF2P395307           | 64227935 | A | 0    | 0      | G |
| 3 | TIGRP2P48933_rs8545710 | 64240590 | C | 0    | 0      | A |
| 3 | TIGRP2P48939_rs8938291 | 64258079 | A | 0    | 0      | G |
| 3 | TIGRP2P48942_rs9214541 | 64267241 | G | 0    | 0      | A |
| 3 | BICF2P775482           | 64279010 | G | 0    | 0      | A |
| 3 | TIGRP2P48949_rs8984522 | 64289056 | G | 0.25 | 0.2857 | A |
| 3 | TIGRP2P48951_rs8882532 | 64297322 | G | 0.25 | 0.2857 | A |
| 3 | BICF2S2444942          | 64311064 | A | 0.25 | 0.2    | G |
| 3 | BICF2P773345           | 64320192 | A | 0.25 | 0.25   | G |
| 3 | TIGRP2P48970_rs9050658 | 64335071 | 0 | 0    | 0      | C |
| 3 | BICF2S23453461         | 64350980 | G | 0.5  | 0.5    | A |
| 3 | TIGRP2P48980_rs9032474 | 64354729 | G | 0.5  | 0.5    | A |
| 3 | BICF2P411106           | 64365635 | A | 0.5  | 0.3571 | G |
| 3 | BICF2S23538058         | 64386124 | A | 0    | 0      | G |
| 3 | BICF2P1109281          | 64394072 | C | 0.5  | 0.5    | A |
| 3 | BICF2P423517           | 64411319 | A | 0.5  | 0.3571 | G |
| 3 | BICF2P264341           | 64421993 | A | 0.5  | 0.3571 | G |
| 3 | BICF2S23643404         | 64433666 | G | 0.5  | 0.3571 | A |
| 3 | BICF2P541067           | 64439304 | A | 0.5  | 0.3571 | G |
| 3 | BICF2P1052534          | 64452764 | C | 0    | 0      | G |
| 3 | BICF2S239724           | 64458956 | 0 | 0    | 0      | A |
| 3 | BICF2P1365720          | 64472930 | A | 0.5  | 0.3571 | G |
| 3 | BICF2P1358359          | 64503166 | G | 0.5  | 0.3571 | A |
| 3 | BICF2S23037417         | 64508829 | 0 | 0    | 0      | A |
| 3 | BICF2P242101           | 64525419 | G | 0.5  | 0.5    | A |
| 3 | BICF2P1467932          | 64535682 | C | 0.25 | 0.2143 | A |
| 3 | BICF2S23641880         | 64545361 | A | 0.25 | 0.2143 | G |
| 3 | TIGRP2P49028_rs8602859 | 64558746 | C | 0.25 | 0.2143 | A |
| 3 | BICF2S2367608          | 64561624 | A | 0.25 | 0.2143 | G |

|   |                        |          |   |      |        |   |
|---|------------------------|----------|---|------|--------|---|
| 3 | BICF2S23237800         | 64566686 | A | 0.25 | 0.2143 | G |
| 3 | BICF2P430946           | 64573123 | G | 0.25 | 0.2143 | A |
| 3 | BICF2P1225657          | 64603358 | G | 0    | 0      | A |
| 3 | BICF2S23635879         | 64610858 | 0 | 0    | 0      | G |
| 3 | BICF2S23221435         | 64640241 | A | 0.25 | 0.2143 | G |
| 3 | BICF2S23154903         | 64642649 | G | 0.75 | 0.5714 | A |
| 3 | BICF2S23653614         | 64658336 | A | 0.75 | 0.5714 | G |
| 3 | BICF2S2324339          | 64669920 | G | 0.5  | 0.3571 | A |
| 3 | TIGRP2P49036_rs8805651 | 64710816 | 0 | 0    | 0      | G |
| 3 | BICF2S23040613         | 64723341 | C | 0.25 | 0.2143 | A |
| 3 | BICF2P490876           | 64737796 | 0 | 0    | 0      | G |
| 3 | BICF2S2392712          | 64749333 | G | 0.5  | 0.3571 | A |
| 3 | BICF2P513996           | 64769568 | C | 0.5  | 0.5    | A |
| 3 | BICF2P1264870          | 64800557 | 0 | 0    | 0      | A |
| 3 | BICF2P804811           | 64826403 | C | 0.5  | 0.5    | A |
| 3 | BICF2P739402           | 64861390 | G | 0    | 0      | A |
| 3 | BICF2P43095            | 64879649 | G | 0.5  | 0.5    | A |
| 3 | BICF2P1352501          | 64902960 | A | 0.5  | 0.5    | G |
| 3 | BICF2P1153028          | 64909200 | A | 0.25 | 0.2857 | G |
| 3 | BICF2P1206807          | 64935199 | 0 | 0    | 0      | A |
| 3 | BICF2P639074           | 64945617 | 0 | 0    | 0      | C |
| 3 | BICF2S2331215          | 64966522 | C | 0.75 | 0.7143 | A |
| 3 | BICF2P1331666          | 64978020 | A | 0.5  | 0.6429 | G |
| 3 | BICF2P1438357          | 65005845 | A | 0.25 | 0.3571 | G |
| 3 | BICF2S2329727          | 65018201 | A | 0.25 | 0.2857 | G |
| 3 | TIGRP2P49043_rs8626439 | 65028420 | 0 | 0    | 0      | C |
| 3 | BICF2P1178263          | 65040857 | 0 | 0    | 0      | C |
| 3 | BICF2P1080329          | 65078184 | G | 0.25 | 0.3571 | A |
| 3 | BICF2P669450           | 65096689 | A | 0    | 0      | G |
| 3 | BICF2P66930            | 65101888 | 0 | 0    | 0      | G |
| 3 | BICF2P288807           | 65118122 | 0 | 0    | 0      | A |
| 3 | BICF2P1316750          | 65131354 | G | 0    | 0      | A |
| 3 | BICF2P1334644          | 65140462 | G | 0    | 0      | A |
| 3 | BICF2P729782           | 65151281 | G | 0.5  | 0.3333 | A |
| 3 | BICF2P843852           | 65161813 | A | 0    | 0      | G |
| 3 | BICF2P866800           | 65178515 | A | 0    | 0      | C |
| 3 | BICF2P558595           | 65184078 | G | 0    | 0      | A |
| 3 | BICF2P27635            | 65194743 | G | 0    | 0      | A |
| 3 | BICF2S2344808          | 65209415 | G | 0.75 | 0.6429 | A |
| 3 | BICF2S2374775          | 65226916 | G | 0.75 | 0.6429 | A |
| 3 | TIGRP2P49066_rs8525028 | 65235594 | G | 0.5  | 0.3571 | A |
| 3 | BICF2P178120           | 65243659 | G | 0.5  | 0.3571 | A |
| 3 | BICF2P1172482          | 65246590 | G | 0.5  | 0.3571 | A |
| 3 | BICF2P1117410          | 65253431 | G | 0.5  | 0.3571 | A |
| 3 | BICF2P662321           | 65280297 | A | 0.5  | 0.3571 | C |
| 3 | TIGRP2P49082_rs9178526 | 65285982 | G | 0.5  | 0.3571 | A |
| 3 | BICF2P74058            | 65302811 | A | 0    | 0      | G |

|   |                        |          |   |      |        |   |
|---|------------------------|----------|---|------|--------|---|
| 3 | TIGRP2P49103_rs9146336 | 65316634 | A | 0    | 0      | G |
| 3 | BICF2P837418           | 65320722 | G | 0    | 0      | C |
| 3 | TIGRP2P49111_rs8957607 | 65339786 | A | 0    | 0      | G |
| 3 | TIGRP2P49119_rs8846167 | 65353514 | G | 0.25 | 0.3571 | A |
| 3 | BICF2P894545           | 65356384 | G | 0    | 0      | A |
| 3 | BICF2P162060           | 65374962 | 0 | 0    | 0      | G |
| 3 | BICF2P606342           | 65387457 | A | 0    | 0      | G |
| 3 | BICF2P1126258          | 65398104 | A | 0.25 | 0.3571 | G |
| 3 | TIGRP2P49153_rs8613185 | 65402031 | A | 0.25 | 0.3571 | C |
| 3 | BICF2P321923           | 65420284 | A | 0.5  | 0.3571 | G |
| 3 | TIGRP2P49171_rs8870704 | 65432281 | G | 0.25 | 0.3571 | A |
| 3 | BICF2S233196           | 65435606 | 0 | 0    | 0      | G |
| 3 | TIGRP2P49191_rs8805750 | 65448134 | A | 0    | 0      | G |
| 3 | BICF2P520230           | 65464435 | G | 0.5  | 0.6429 | A |
| 3 | BICF2P769649           | 65471660 | C | 0.25 | 0.3571 | G |
| 3 | BICF2P1307374          | 65491350 | A | 0.25 | 0.3571 | G |
| 3 | BICF2S23022381         | 65492218 | A | 0.25 | 0.3571 | G |
| 3 | BICF2P453832           | 65495867 | G | 0.25 | 0.3571 | A |
| 3 | BICF2P719471           | 65508171 | A | 0.5  | 0.7    | C |
| 3 | BICF2P326606           | 65521032 | A | 0.5  | 0.6429 | T |
| 3 | BICF2P300958           | 65532774 | G | 0    | 0      | A |
| 3 | TIGRP2P49234_rs8488140 | 65539565 | C | 0.25 | 0.3571 | A |
| 3 | TIGRP2P49239_rs9250235 | 65559164 | G | 0    | 0      | A |
| 3 | BICF2P658394           | 65566630 | G | 0    | 0      | A |
| 3 | BICF2P490086           | 65577908 | G | 0.25 | 0.3571 | A |
| 3 | BICF2P502811           | 65585619 | C | 0.25 | 0.3571 | A |
| 3 | TIGRP2P49255_rs8824353 | 65599045 | A | 0.25 | 0.3571 | T |
| 3 | BICF2P934755           | 65608113 | C | 0.25 | 0.3571 | A |
| 3 | BICF2P1250546          | 65624121 | A | 0.25 | 0.3571 | G |
| 3 | BICF2P301717           | 65641386 | G | 1    | 1      | A |
| 3 | BICF2P709341           | 65647100 | G | 0.5  | 0.5    | A |
| 3 | TIGRP2P49281_rs8893465 | 65656763 | A | 0    | 0.1429 | G |
| 3 | BICF2P569615           | 65671605 | A | 0    | 0.1429 | G |
| 3 | TIGRP2P49316_rs8806912 | 65679389 | A | NA   | 0      | G |
| 3 | BICF2P35664            | 65692398 | A | 0    | 0      | C |
| 3 | BICF2S23519714         | 65701180 | 0 | 0    | 0      | T |
| 3 | BICF2S23618444         | 65719704 | 0 | 0    | 0      | G |
| 3 | BICF2P21544            | 65733033 | A | 0    | 0      | G |
| 3 | BICF2P642457           | 65741110 | A | 0.5  | 0.5    | G |
| 3 | BICF2S2332988          | 65754103 | A | 1    | 1      | G |
| 3 | BICF2S23427474         | 65768058 | A | 0    | 0      | G |
| 3 | TIGRP2P49323_rs8616963 | 65772273 | G | 0.25 | 0.2857 | A |
| 3 | BICF2S23716361         | 65782820 | A | 0    | 0      | T |
| 3 | TIGRP2P49338_rs8816394 | 65798932 | A | 0.25 | 0.2857 | G |
| 3 | BICF2P542628           | 65805602 | C | 0.25 | 0.2857 | A |
| 3 | BICF2P819375           | 65819677 | A | 0.5  | 0.5    | G |
| 3 | BICF2P193250           | 65828321 | G | 0.5  | 0.5    | A |

|   |                        |          |   |      |        |   |
|---|------------------------|----------|---|------|--------|---|
| 3 | BICF2S2355918          | 65878368 | A | 0.5  | 0.3571 | G |
| 3 | BICF2P694343           | 65887720 | A | 0.5  | 0.5    | C |
| 3 | TIGRP2P49370_rs8999964 | 65902596 | A | 0.5  | 0.5    | G |
| 3 | BICF2P1103227          | 65909090 | A | 0.25 | 0.3571 | G |
| 3 | TIGRP2P49382_rs9098498 | 65918354 | A | 0    | 0.1429 | G |
| 3 | BICF2P1090399          | 65936595 | A | 0    | 0.1429 | G |
| 3 | BICF2P1468754          | 65946368 | G | 0    | 0.1429 | A |
| 3 | BICF2P555691           | 65960857 | 0 | 0    | 0      | A |
| 3 | BICF2P764473           | 65973039 | A | 0.25 | 0.3571 | G |
| 3 | TIGRP2P49402_rs9012777 | 65982789 | A | 0.25 | 0.2143 | C |
| 3 | BICF2S23152827         | 65987276 | A | 0.25 | 0.4286 | G |
| 3 | BICF2P592635           | 65998877 | A | 0.75 | 0.5714 | G |
| 3 | BICF2S23130617         | 66013421 | G | 0.25 | 0.4286 | A |
| 3 | BICF2S23638859         | 66024768 | A | 0.25 | 0.4286 | G |
| 3 | BICF2P1366510          | 66041506 | 0 | 0    | 0      | G |
| 3 | BICF2S22951222         | 66065045 | C | 0.25 | 0.2143 | G |
| 3 | TIGRP2P49443_rs8907435 | 66069853 | G | 0.25 | 0.2143 | A |
| 3 | BICF2S23736695         | 66089780 | G | 0.25 | 0.2143 | A |
| 3 | BICF2S22915070         | 66096931 | A | 0.25 | 0.2143 | C |
| 3 | BICF2P322435           | 66108564 | 0 | 0    | 0      | G |
| 3 | TIGRP2P49457_rs8894721 | 66122325 | G | 0.25 | 0.2857 | A |
| 3 | TIGRP2P49463_rs8782464 | 66131428 | C | 0    | 0      | A |
| 3 | TIGRP2P49465_rs8603847 | 66139117 | G | 0.5  | 0.5    | A |
| 3 | BICF2P1097241          | 66149547 | A | 0.25 | 0.2143 | C |
| 3 | BICF2P240201           | 66163367 | 0 | 0    | 0      | G |
| 3 | BICF2P856918           | 66202083 | 0 | 0    | 0      | C |
| 3 | TIGRP2P49485_rs8740704 | 66243437 | A | 0.25 | 0.2143 | G |
| 3 | BICF2P997216           | 66267153 | 0 | 0    | 0      | C |
| 3 | BICF2P1014101          | 66274565 | G | 0.25 | 0.2857 | A |
| 3 | TIGRP2P49493_rs8923196 | 66286706 | G | 0.5  | 0.5    | A |
| 3 | BICF2P321009           | 66297524 | A | 0    | 0      | T |
| 3 | TIGRP2P49503_rs8588300 | 66313308 | A | 0    | 0      | G |
| 3 | BICF2P1317936          | 66323543 | A | 0.25 | 0.2143 | G |
| 3 | BICF2P640768           | 66336117 | G | 0    | 0      | A |
| 3 | BICF2P787994           | 66348280 | A | 0    | 0      | G |
| 3 | BICF2P251730           | 66377205 | A | 0    | 0      | C |
| 3 | BICF2P298595           | 66384297 | G | 0.5  | 0.3333 | A |
| 3 | BICF2P416288           | 66384942 | A | 0.5  | 0.3571 | G |
| 3 | BICF2P1368437          | 66393222 | A | 0.5  | 0.3571 | G |
| 3 | BICF2P617840           | 66402781 | 0 | 0    | 0      | G |
| 3 | BICF2P1294407          | 66416172 | G | 0.5  | 0.3571 | A |
| 3 | BICF2P312117           | 66429336 | 0 | 0    | 0      | A |
| 3 | TIGRP2P49515_rs9087005 | 66438974 | G | 0    | 0      | A |
| 3 | BICF2P1075017          | 66451777 | A | 0    | 0.1429 | C |
| 3 | BICF2P734859           | 66468931 | A | 0.25 | 0.3571 | G |
| 3 | BICF2P1163811          | 66471791 | A | 0.25 | 0.3571 | G |
| 3 | BICF2P1154239          | 66491608 | A | 0.5  | 0.3571 | G |

|   |                        |          |   |      |        |   |
|---|------------------------|----------|---|------|--------|---|
| 3 | BICF2P994544           | 66494958 | G | 0    | 0      | C |
| 3 | BICF2P542436           | 66513676 | A | 0    | 0      | G |
| 3 | BICF2P58639            | 66521123 | G | 0.5  | 0.5    | A |
| 3 | BICF2P48815            | 66529334 | G | 0.75 | 0.7143 | A |
| 3 | BICF2P959145           | 66550016 | 0 | 0    | 0      | T |
| 3 | BICF2P959146           | 66551971 | A | 0    | 0      | C |
| 3 | BICF2S2392617          | 66564883 | A | 0.75 | 0.7857 | G |
| 3 | BICF2P1163375          | 66574331 | A | 0.75 | 0.6429 | G |
| 3 | BICF2P848619           | 66586691 | A | 0.5  | 0.3571 | G |
| 3 | BICF2P1382935          | 66598466 | A | 0.25 | 0.2143 | G |
| 3 | TIGRP2P49555_rs9082920 | 66611026 | 0 | 0    | 0      | C |
| 3 | BICF2P468740           | 66625495 | 0 | 0    | 0      | G |
| 3 | BICF2S23342385         | 66635649 | C | 0    | 0      | A |
| 3 | BICF2P368516           | 66663886 | G | 0.25 | 0.2857 | A |
| 3 | BICF2P1396444          | 66683189 | 0 | 0    | 0      | A |
| 3 | BICF2P931287           | 66696910 | 0 | 0    | 0      | A |
| 3 | BICF2P891498           | 66701847 | G | 0.5  | 0.3571 | A |
| 3 | BICF2P168507           | 66717151 | A | 0    | 0      | G |
| 3 | BICF2P610913           | 66726168 | G | 0.75 | 0.7857 | A |
| 3 | BICF2S23056422         | 66745235 | A | 0    | 0      | C |
| 3 | BICF2P1073231          | 66750386 | G | 0    | 0      | A |
| 3 | BICF2P338360           | 66767746 | G | 0.25 | 0.2857 | A |
| 3 | BICF2S23020868         | 66776073 | G | 0.75 | 0.6429 | A |
| 3 | BICF2S23116437         | 66788808 | G | 0.75 | 0.6429 | A |
| 3 | BICF2P1438438          | 66794802 | A | 0.25 | 0.2857 | G |
| 3 | BICF2P46639            | 66797351 | A | 0.25 | 0.2857 | G |
| 3 | BICF2P46642            | 66797875 | A | 0.25 | 0.2857 | G |
| 3 | BICF2P169178           | 66803028 | A | 0    | 0      | G |
| 3 | BICF2P447527           | 66810286 | G | 0.25 | 0.2857 | C |
| 3 | BICF2P447529           | 66811189 | A | 0    | 0      | G |
| 3 | TIGRP2P49576_rs9100268 | 66824733 | A | 0    | 0      | G |
| 3 | BICF2P773595           | 66830938 | C | 0    | 0      | G |
| 3 | BICF2S22940151         | 66840067 | A | 0    | 0      | G |
| 3 | BICF2S22940150         | 66840260 | A | 0    | 0      | G |
| 3 | BICF2P1384848          | 66843894 | A | 0    | 0      | G |
| 3 | BICF2S23332321         | 66867572 | A | 0.5  | 0.3571 | C |
| 3 | BICF2P714427           | 66873406 | G | 0    | 0      | A |
| 3 | BICF2P1026251          | 66888730 | A | 0.25 | 0.2857 | C |
| 3 | TIGRP2P49634_rs8688959 | 66897187 | A | 0.25 | 0.3571 | G |
| 3 | TIGRP2P49655_rs8812824 | 66910500 | G | 0.25 | 0.2857 | A |
| 3 | BICF2S23415368         | 66924426 | A | 0.5  | 0.3571 | C |
| 3 | BICF2P44586            | 66931307 | A | 0.5  | 0.5    | G |
| 3 | BICF2P363864           | 66944740 | A | 0.5  | 0.6429 | C |
| 3 | TIGRP2P49662_rs8852356 | 66958772 | A | 0    | 0      | C |
| 3 | BICF2P1293295          | 66977621 | A | 0.25 | 0.3571 | G |
| 3 | TIGRP2P49666_rs8695194 | 67012961 | G | 0.25 | 0.3571 | A |
| 3 | BICF2S23727063         | 67028911 | A | 0    | 0      | G |

|   |                        |          |   |      |        |   |
|---|------------------------|----------|---|------|--------|---|
| 3 | BICF2P512949           | 67036555 | A | 0    | 0      | G |
| 3 | BICF2P535851           | 67055333 | A | 0    | 0      | G |
| 3 | BICF2P309055           | 67056782 | G | 0.5  | 0.6429 | A |
| 3 | BICF2P688082           | 67063890 | 0 | 0    | 0      | G |
| 3 | BICF2P492132           | 67068552 | A | 0.25 | 0.2143 | G |
| 3 | BICF2S23626216         | 67074930 | G | 0    | 0      | A |
| 3 | TIGRP2P49699_rs9116058 | 67082489 | 0 | 0    | 0      | G |
| 3 | BICF2P530359           | 67092919 | G | 0.25 | 0.2143 | A |
| 3 | BICF2P683939           | 67102843 | A | 0    | 0      | G |
| 3 | BICF2S22942140         | 67114726 | G | 0.5  | 0.5    | A |
| 3 | BICF2P1386441          | 67125807 | C | 0    | 0      | G |
| 3 | BICF2P65473            | 67131513 | A | 0.25 | 0.2857 | G |
| 3 | TIGRP2P49720_rs8614640 | 67138798 | G | 0.75 | 0.6429 | A |
| 3 | BICF2P1073727          | 67154892 | G | 0.75 | 0.6429 | A |
| 3 | BICF2S23751029         | 67161315 | G | 0    | 0      | A |
| 3 | BICF2P567431           | 67171666 | A | 0.75 | 0.6429 | G |
| 3 | BICF2P26328            | 67190435 | A | 0    | 0      | G |
| 3 | BICF2P1424969          | 67202324 | G | 0    | 0      | A |
| 3 | TIGRP2P49740_rs8959733 | 67208156 | A | 0.5  | 0.3571 | G |
| 3 | BICF2P240270           | 67223110 | 0 | 0    | 0      | C |
| 3 | BICF2P712052           | 67234725 | 0 | 0    | 0      | A |
| 3 | BICF2P1424914          | 67239116 | 0 | 0    | 0      | A |
| 3 | BICF2P317973           | 67245773 | A | 0.25 | 0.2143 | G |
| 3 | TIGRP2P49760_rs8958538 | 67261480 | A | 0.25 | 0.2857 | G |
| 3 | BICF2S23142243         | 67268191 | G | 0.25 | 0.2857 | A |
| 3 | BICF2P1043342          | 67278561 | A | 0.25 | 0.2143 | G |
| 3 | BICF2P894852           | 67287393 | A | 0.75 | 0.7857 | G |
| 3 | BICF2P78723            | 67298418 | 0 | 0    | 0      | G |
| 3 | BICF2P358456           | 67314634 | G | 0    | 0      | A |
| 3 | BICF2P1443597          | 67331430 | G | 0.5  | 0.3571 | A |
| 3 | BICF2P7008             | 67335818 | A | 0.5  | 0.3571 | G |
| 3 | BICF2P552620           | 67350592 | A | 0.75 | 0.7857 | G |
| 3 | TIGRP2P49812_rs9051671 | 67358831 | T | 0.75 | 0.7857 | A |
| 3 | BICF2P869841           | 67367856 | G | 0    | 0      | A |
| 3 | BICF2S22917354         | 67387649 | G | 0.25 | 0.4286 | A |
| 3 | BICF2S2299139          | 67391711 | T | 0.5  | 0.6429 | A |
| 3 | BICF2S22932414         | 67411536 | A | 0    | 0.1429 | C |
| 3 | BICF2P180050           | 67419174 | A | 0.25 | 0.3571 | G |
| 3 | BICF2S2457463          | 67430638 | A | 1    | 0.8571 | G |
| 3 | BICF2S23428312         | 67445082 | G | 0.25 | 0.3571 | A |
| 3 | BICF2S23539070         | 67452634 | G | 0.5  | 0.3571 | A |
| 3 | BICF2S22947988         | 67459698 | G | 0.75 | 0.6429 | A |
| 3 | BICF2G630344836        | 67480795 | G | 0.75 | 0.6429 | A |
| 3 | BICF2P995134           | 67490324 | C | 0.5  | 0.5    | A |
| 3 | TIGRP2P49822_rs8875284 | 67498577 | G | 0.25 | 0.2143 | A |
| 3 | BICF2P816097           | 67507471 | A | 0    | 0      | G |
| 3 | TIGRP2P49838_rs8998603 | 67533451 | A | 0    | 0.1429 | G |

|   |                        |          |   |      |         |   |
|---|------------------------|----------|---|------|---------|---|
| 3 | BICF2P661179           | 67548649 | A | 0    | 0.1429  | G |
| 3 | BICF2P635501           | 67551095 | G | 0.5  | 0.5     | A |
| 3 | BICF2P519601           | 67574906 | A | 0    | 0.1429  | G |
| 3 | BICF2S23153107         | 67578621 | G | 0.5  | 0.5     | A |
| 3 | BICF2S23131014         | 67591489 | G | 0.25 | 0.2857  | A |
| 3 | BICF2G630344838        | 67601686 | 0 | 0    | 0       | G |
| 3 | BICF2G630344853        | 67612212 | 0 | 0    | 0       | A |
| 3 | BICF2S23433396         | 67629000 | A | 1    | 0.8571  | G |
| 3 | BICF2G630344873        | 67635310 | A | 0    | 0.08333 | G |
| 3 | BICF2G630344887        | 67643449 | 0 | 0    | 0       | G |
| 3 | BICF2G630344897        | 67658709 | A | 0    | 0       | G |
| 3 | BICF2P1471820          | 67666262 | G | 0    | 0.08333 | A |
| 3 | BICF2P1264821          | 67685912 | A | 0.25 | 0.4286  | G |
| 3 | BICF2G630344913        | 67686137 | A | 0.25 | 0.2857  | G |
| 3 | BICF2G630344915        | 67686711 | A | 0.5  | 0.3571  | G |
| 3 | BICF2G630344927        | 67691251 | A | 0    | 0       | G |
| 3 | BICF2G630344936        | 67705849 | A | 0    | 0       | G |
| 3 | BICF2G630344945        | 67712095 | A | 0.75 | 0.5714  | G |
| 3 | BICF2G630344967        | 67724932 | G | 0.75 | 0.7143  | A |
| 3 | BICF2P557415           | 67725714 | G | 0.75 | 0.7143  | A |
| 3 | BICF2G630344981        | 67735724 | A | 0.75 | 0.5714  | T |
| 3 | TIGRP2P49866_rs9008125 | 67740234 | G | 0    | 0       | A |
| 3 | BICF2G630345011        | 67755303 | A | 0    | 0       | G |
| 3 | BICF2G630345026        | 67763483 | G | 0.25 | 0.2857  | A |
| 3 | BICF2P309665           | 67779501 | 0 | 0    | 0       | A |
| 3 | BICF2G630345065        | 67786972 | A | 0    | 0       | G |
| 3 | BICF2G630345066        | 67787519 | A | 0.75 | 0.7143  | G |
| 3 | BICF2G630345080        | 67794889 | A | 0    | 0       | G |
| 3 | BICF2S23331471         | 67810190 | G | 0.75 | 0.7143  | A |
| 3 | BICF2G630345101        | 67820032 | G | 0.25 | 0.2857  | A |
| 3 | BICF2G630345121        | 67831403 | 0 | 0    | 0       | A |
| 3 | BICF2G630345144        | 67844629 | 0 | 0    | 0       | A |
| 3 | BICF2G630345156        | 67852801 | C | 0.5  | 0.6429  | A |
| 3 | BICF2G630345196        | 67872772 | C | 0    | 0       | G |
| 3 | BICF2G630345201        | 67874772 | 0 | 0    | 0       | G |
| 3 | BICF2G630345220        | 67888202 | C | 0    | 0       | G |
| 3 | BICF2S23218201         | 67897603 | A | 0.25 | 0.2143  | G |
| 3 | BICF2P1283067          | 67914760 | G | 0.75 | 0.6429  | A |
| 3 | BICF2G630345260        | 67923630 | 0 | 0    | 0       | G |
| 3 | BICF2P285312           | 67932091 | A | 1    | 0.8571  | T |
| 3 | BICF2P473628           | 67937731 | A | 1    | 0.8571  | G |
| 3 | BICF2P1185439          | 67944661 | A | 0.5  | 0.3571  | G |
| 3 | BICF2P709396           | 67962554 | 0 | 0    | 0       | T |
| 3 | BICF2P1123361          | 67975617 | A | 1    | 0.8571  | G |
| 3 | BICF2P1123362          | 67977288 | A | 0    | 0       | G |
| 3 | BICF2P1251459          | 67990743 | A | 0.5  | 0.3571  | G |
| 3 | BICF2P1132914          | 68023120 | A | 0    | 0       | G |

|   |                        |          |   |      |         |   |
|---|------------------------|----------|---|------|---------|---|
| 3 | TIGRP2P49917_rs9117548 | 68044070 | 0 | 0    | 0       | G |
| 3 | BICF2P959251           | 68053465 | G | 0    | 0       | A |
| 3 | BICF2P1145840          | 68069386 | A | 0    | 0       | C |
| 3 | BICF2P761855           | 68085992 | G | 0    | 0       | A |
| 3 | BICF2P274285           | 68099807 | A | 0.5  | 0.5     | G |
| 3 | BICF2P138501           | 68103223 | A | 0    | 0.08333 | C |
| 3 | BICF2P228853           | 68124649 | A | 0    | 0.1429  | C |
| 3 | BICF2P609956           | 68126903 | A | 0    | 0.1429  | G |
| 3 | BICF2P1213451          | 68139813 | A | 0    | 0       | C |
| 3 | BICF2S23640431         | 68165617 | G | 0.5  | 0.5     | A |
| 3 | BICF2S23344482         | 68205869 | A | 0.75 | 0.5714  | G |
| 3 | BICF2P439249           | 68209925 | A | 0.25 | 0.2857  | G |
| 3 | BICF2P7565             | 68219772 | A | 0.25 | 0.2857  | G |
| 3 | BICF2P245896           | 68229669 | A | 0    | 0       | C |
| 3 | TIGRP2P49928_rs8790711 | 68242993 | A | 0.25 | 0.2857  | G |
| 3 | BICF2S23143373         | 68260652 | G | 0    | 0.1429  | A |
| 3 | BICF2S23345176         | 68267363 | A | 0    | 0       | G |
| 3 | BICF2S23014631         | 68282170 | A | 0    | 0       | G |
| 3 | BICF2P846585           | 68288751 | G | 1    | 0.75    | A |
| 3 | BICF2P1103033          | 68307060 | A | 0.5  | 0.3571  | C |
| 3 | TIGRP2P49942_rs8703629 | 68310410 | A | 0    | 0       | C |
| 3 | BICF2P973388           | 68331032 | A | 0    | 0.1429  | G |
| 3 | BICF2S2316059          | 68333394 | G | 0.75 | 0.6667  | A |
| 3 | BICF2S23132463         | 68339839 | A | 0.25 | 0.4286  | G |
| 3 | BICF2P467898           | 68345210 | A | 0.25 | 0.2857  | G |
| 3 | BICF2S2322715          | 68366130 | G | 0.75 | 0.7857  | A |
| 3 | BICF2P1451136          | 68377590 | A | 0    | 0       | G |
| 3 | BICF2S23730494         | 68389918 | G | 0.25 | 0.2857  | A |
| 3 | BICF2P414412           | 68398777 | G | 0.75 | 0.8333  | A |
| 3 | BICF2P1372577          | 68403630 | A | NA   | 1       | G |
| 3 | BICF2P457326           | 68414265 | A | 0.75 | 0.7143  | G |
| 3 | BICF2P654341           | 68428527 | A | 0.25 | 0.2857  | G |
| 3 | BICF2S23617521         | 68441724 | G | 0    | 0       | A |
| 3 | TIGRP2P49969_rs8871623 | 68454861 | A | 0    | 0       | G |
| 3 | BICF2P1237477          | 68466584 | A | 0.5  | 0.3571  | G |
| 3 | BICF2P489823           | 68479078 | G | 0.5  | 0.5     | A |
| 3 | BICF2P1386329          | 68491366 | G | 0.25 | 0.2143  | C |
| 3 | BICF2P1186035          | 68504949 | G | 0.5  | 0.5     | A |
| 3 | BICF2P132838           | 68506087 | A | 0.5  | 0.5     | G |
| 3 | TIGRP2P49979_rs8990898 | 68527985 | G | 0    | 0       | A |
| 3 | BICF2P609698           | 68529551 | A | 0    | 0       | G |
| 3 | TIGRP2P49999_rs8581867 | 68553145 | A | 0.75 | 0.7857  | G |
| 3 | BICF2P177393           | 68574297 | A | 0    | 0       | C |
| 3 | TIGRP2P50007_rs9061085 | 68579798 | A | 0.5  | 0.5     | G |
| 3 | BICF2S23043248         | 68589318 | G | 0.5  | 0.5     | A |
| 3 | BICF2P187049           | 68593030 | A | 0.5  | 0.5     | G |
| 3 | BICF2P1324033          | 68602798 | A | 0.5  | 0.5     | G |



|   |                        |          |   |      |        |   |
|---|------------------------|----------|---|------|--------|---|
| 3 | BICF2P1324491          | 68616598 | A | 0.5  | 0.5    | G |
| 3 | BICF2S23427334         | 68628755 | A | 0.5  | 0.5    | G |
| 3 | TIGRP2P50020_rs8998002 | 68640323 | C | 0.5  | 0.3571 | A |
| 3 | BICF2P51950            | 68646738 | A | 0    | 0.1429 | G |
| 3 | BICF2P502761           | 68659250 | G | 0    | 0.1429 | A |
| 3 | BICF2S23758753         | 68667118 | G | 0.5  | 0.3571 | A |
| 3 | BICF2P929916           | 68678428 | 0 | 0    | 0      | C |
| 3 | BICF2P72727            | 68734456 | A | 0    | 0      | T |
| 3 | TIGRP2P50046_rs9033895 | 68745255 | A | 0.25 | 0.2857 | C |
| 3 | BICF2P894266           | 68765812 | G | 0.25 | 0.2143 | A |
| 3 | TIGRP2P50052_rs8620719 | 68777949 | 0 | 0    | 0      | A |
| 3 | BICF2P1364518          | 68791918 | 0 | 0    | 0      | G |
| 3 | TIGRP2P50055_rs8669528 | 68795364 | A | 0    | 0      | G |
| 3 | BICF2P593682           | 68813286 | G | 0.5  | 0.6429 | A |
| 3 | BICF2P18746            | 68819182 | C | 0    | 0      | G |
| 3 | BICF2P779130           | 68822743 | C | 0    | 0      | A |
| 3 | BICF2P710229           | 68828416 | 0 | 0    | 0      | A |
| 3 | BICF2P500977           | 68854204 | G | 0    | 0      | A |
| 3 | TIGRP2P50073_rs8498840 | 68862653 | A | 0    | 0      | G |
| 3 | TIGRP2P50082_rs9191723 | 68874216 | G | 0.25 | 0.2857 | A |
| 3 | BICF2P1126281          | 68886788 | A | 0.75 | 0.6429 | G |
| 3 | BICF2S2315924          | 68900707 | A | 0    | 0      | G |
| 3 | BICF2P565216           | 68910570 | A | 0.75 | 0.6667 | C |
| 3 | BICF2P723911           | 68928478 | G | 1    | 0.8571 | A |
| 3 | BICF2S23738452         | 68933915 | G | 0.25 | 0.2857 | A |
| 3 | BICF2P648372           | 68945567 | A | 0.25 | 0.3571 | C |
| 3 | BICF2S22957793         | 68960830 | A | 0.25 | 0.2143 | G |
| 3 | BICF2P527136           | 68975843 | A | 0    | 0      | C |
| 3 | BICF2P1186716          | 68986874 | A | 0.5  | 0.5    | C |
| 3 | BICF2P1186710          | 68990291 | G | 0    | 0.1429 | A |
| 3 | BICF2P303544           | 69006427 | 0 | 0    | 0      | A |
| 3 | BICF2P732794           | 69021070 | A | 0    | 0.1429 | G |
| 3 | BICF2S2329505          | 69031025 | A | 0.5  | 0.6429 | G |
| 3 | BICF2P1097648          | 69035536 | G | 0    | 0      | A |
| 3 | BICF2P243298           | 69051615 | A | 0    | 0      | G |
| 3 | BICF2P524402           | 69062854 | A | 0    | 0      | G |
| 3 | BICF2P379989           | 69076414 | A | 0    | 0      | C |
| 3 | BICF2P1467922          | 69088664 | 0 | 0    | 0      | A |
| 3 | BICF2P261621           | 69111456 | A | 0    | 0.2857 | G |
| 3 | BICF2P96219            | 69117997 | G | 0.75 | 0.5714 | C |
| 3 | BICF2P648682           | 69127226 | G | 0    | 0      | A |
| 3 | BICF2P1129696          | 69149359 | 0 | 0    | 0      | A |
| 3 | BICF2P849209           | 69154338 | A | 0.75 | 0.7857 | C |
| 3 | BICF2S23448872         | 69161697 | A | 0    | 0.1429 | G |
| 3 | BICF2P328746           | 69172980 | G | 0.25 | 0.2143 | A |
| 3 | BICF2P1156154          | 69185359 | 0 | 0    | 0      | G |
| 3 | BICF2P992809           | 69203064 | G | 0.75 | 0.7857 | A |

|   |                        |          |   |      |        |   |
|---|------------------------|----------|---|------|--------|---|
| 3 | BICF2S23520686         | 69218276 | A | 0    | 0      | C |
| 3 | BICF2P688220           | 69223699 | G | 0    | 0.1429 | A |
| 3 | TIGRP2P50215_rs8728468 | 69234436 | 0 | 0    | 0      | A |
| 3 | BICF2P1083868          | 69243978 | 0 | 0    | 0      | A |
| 3 | BICF2P916420           | 69258507 | 0 | 0    | 0      | G |
| 3 | BICF2P350158           | 69272190 | C | 0    | 0.1429 | G |
| 3 | BICF2S23714291         | 69280578 | C | 1    | 0.8571 | G |
| 3 | BICF2P886901           | 69288749 | G | 1    | 0.8571 | C |
| 3 | BICF2P249565           | 69299286 | A | 1    | 0.8571 | C |
| 3 | BICF2P935862           | 69313456 | A | 0    | 0      | G |
| 3 | BICF2P399980           | 69323758 | G | 0    | 0.1429 | A |
| 3 | TIGRP2P50242_rs8861480 | 69338780 | A | 0.25 | 0.2143 | G |
| 3 | BICF2S23526990         | 69355627 | A | 0    | 0      | G |
| 3 | TIGRP2P50246_rs8547899 | 69359254 | A | 0    | 0      | G |
| 3 | BICF2P54999            | 69368988 | A | 0.25 | 0.2143 | C |
| 3 | BICF2P969447           | 69393345 | G | 0    | 0      | A |
| 3 | BICF2P642590           | 69408881 | G | 0.75 | 0.6429 | A |
| 3 | TIGRP2P50258_rs8798843 | 69415426 | 0 | 0    | 0      | A |
| 3 | BICF2P835144           | 69434513 | C | 0.25 | 0.3571 | G |
| 3 | BICF2G630345263        | 69435096 | A | 0    | 0      | T |
| 3 | BICF2G630345270        | 69444577 | C | 0.25 | 0.3571 | A |
| 3 | BICF2G630345286        | 69459185 | G | 0.25 | 0.3571 | A |
| 3 | BICF2G630345289        | 69466824 | G | 0.25 | 0.3571 | A |
| 3 | BICF2G630345293        | 69471784 | G | 0    | 0      | A |
| 3 | BICF2S23136281         | 69490762 | G | 0    | 0      | C |
| 3 | BICF2G630345318        | 69503924 | A | 0.25 | 0.3571 | C |
| 3 | BICF2S2296258          | 69539934 | A | 0    | 0      | G |
| 3 | BICF2G630345330        | 69544125 | A | 0    | 0      | G |
| 3 | BICF2G630345336        | 69569274 | A | 0    | 0      | C |
| 3 | BICF2G630345352        | 69581680 | G | 0    | 0      | A |
| 3 | BICF2G630345367        | 69589789 | A | 0.75 | 0.6429 | G |
| 3 | BICF2G630345396        | 69597139 | A | 0.75 | 0.6429 | G |
| 3 | BICF2G630345410        | 69604454 | A | 0.25 | 0.3571 | G |
| 3 | BICF2G630345426        | 69610135 | C | 0.25 | 0.3571 | A |
| 3 | BICF2S23250158         | 69621013 | A | 1    | 1      | G |
| 3 | BICF2G630345466        | 69634623 | A | 0    | 0      | G |
| 3 | BICF2G630345490        | 69648339 | A | 0    | 0      | G |
| 3 | BICF2G630345504        | 69657743 | A | 0    | 0      | G |
| 3 | BICF2G630345507        | 69669598 | G | 0.75 | 0.6429 | A |
| 3 | BICF2G630345527        | 69679660 | A | 0.75 | 0.6429 | G |
| 3 | BICF2G630345576        | 69693921 | C | 0.75 | 0.6429 | G |
| 3 | BICF2G630345596        | 69709314 | C | 0.75 | 0.6429 | A |
| 3 | TIGRP2P50308_rs8927007 | 69718879 | A | 0.25 | 0.2143 | C |
| 3 | BICF2G630345618        | 69725979 | A | 0.75 | 0.6429 | C |
| 3 | BICF2G630345625        | 69730837 | A | 0    | 0.1429 | G |
| 3 | BICF2G630345635        | 69745232 | A | 0.75 | 0.6429 | G |
| 3 | BICF2G630345647        | 69754125 | G | 0.75 | 0.6429 | A |

|   |                        |          |   |      |        |   |
|---|------------------------|----------|---|------|--------|---|
| 3 | BICF2G630345649        | 69760998 | A | 0    | 0.1429 | G |
| 3 | BICF2P10506            | 69778761 | 0 | 0    | 0      | G |
| 3 | BICF2G630345673        | 69790926 | T | 0.75 | 0.6429 | A |
| 3 | BICF2G630345674        | 69791354 | A | 0.75 | 0.6429 | G |
| 3 | BICF2G630345690        | 69802257 | C | 0.75 | 0.7857 | A |
| 3 | TIGRP2P50320_rs8755840 | 69808184 | 0 | 0    | 0      | A |
| 3 | BICF2P1081142          | 69816728 | C | 0    | 0      | A |
| 3 | BICF2P459498           | 69833015 | A | 0    | 0      | G |
| 3 | BICF2G630345711        | 69840368 | A | 0    | 0.1429 | G |
| 3 | BICF2G630345740        | 69857166 | A | 0    | 0      | T |
| 3 | BICF2G630345754        | 69862892 | G | 0    | 0      | A |
| 3 | BICF2G630345774        | 69879927 | C | 0.5  | 0.3571 | G |
| 3 | BICF2G630345786        | 69890009 | G | 0.5  | 0.3571 | A |
| 3 | BICF2G630345802        | 69905649 | A | 0.75 | 0.6429 | C |
| 3 | BICF2G630345808        | 69911168 | T | 0.5  | 0.5    | A |
| 3 | BICF2G630345826        | 69920556 | A | 0    | 0      | G |
| 3 | BICF2G630345828        | 69933007 | T | 0    | 0      | A |
| 3 | BICF2P1214528          | 69946507 | A | 0.25 | 0.4286 | T |
| 3 | BICF2G630345839        | 69960441 | A | 0    | 0      | G |
| 3 | BICF2P17991            | 69975205 | C | 0    | 0.1429 | A |
| 3 | BICF2S23526539         | 69977749 | A | 0.75 | 0.5714 | G |
| 3 | BICF2S23355278         | 69995706 | G | 0    | 0.1429 | A |
| 3 | BICF2P948881           | 70009692 | A | 0    | 0.1429 | G |
| 3 | BICF2P79149            | 70014068 | G | 0    | 0.1429 | A |
| 3 | TIGRP2P50394_rs9036798 | 70028209 | G | 0.75 | 0.7857 | A |
| 3 | BICF2P758703           | 70035165 | G | 0.25 | 0.4286 | A |
| 3 | BICF2G630345852        | 70049657 | A | 0    | 0      | G |
| 3 | BICF2G630345858        | 70054032 | A | 0    | 0      | G |
| 3 | BICF2G630345875        | 70064843 | A | 0.75 | 0.6429 | T |
| 3 | BICF2S2309863          | 70070862 | A | 0    | 0.1429 | G |
| 3 | TIGRP2P50432_rs9000420 | 70082400 | A | 0.25 | 0.2857 | G |
| 3 | BICF2G630345921        | 70097063 | C | 0    | 0      | A |
| 3 | BICF2P518476           | 70113548 | G | 0.75 | 0.6429 | A |
| 3 | BICF2P518474           | 70113864 | G | 0.75 | 0.6429 | A |
| 3 | BICF2G630345967        | 70117499 | C | 0    | 0      | G |
| 3 | BICF2G630345981        | 70126870 | C | 0    | 0.1429 | G |
| 3 | BICF2G630345989        | 70130362 | A | 0    | 0      | G |
| 3 | BICF2G630346015        | 70139605 | A | 0.5  | 0.3571 | G |
| 3 | BICF2G630346055        | 70152534 | A | 0    | 0      | C |
| 3 | BICF2G630346070        | 70158591 | A | 0.75 | 0.6429 | G |
| 3 | BICF2G630346076        | 70164800 | G | 0    | 0.1429 | A |
| 3 | BICF2G630346114        | 70179319 | G | 0    | 0.1429 | A |
| 3 | BICF2G630346124        | 70185797 | G | 0    | 0.1429 | A |
| 3 | BICF2G630346139        | 70203326 | A | 0.75 | 0.7143 | G |
| 3 | BICF2G630346140        | 70203556 | G | 0.75 | 0.7143 | A |
| 3 | BICF2S23018412         | 70204740 | C | 0    | 0      | A |
| 3 | BICF2P206870           | 70210381 | A | 0    | 0      | C |

|   |                        |          |   |      |         |   |
|---|------------------------|----------|---|------|---------|---|
| 3 | BICF2S2333853          | 70237721 | G | 0.25 | 0.2143  | A |
| 3 | BICF2G630346148        | 70243707 | A | 0    | 0.1429  | G |
| 3 | BICF2G630346177        | 70257239 | A | 0.5  | 0.5     | G |
| 3 | BICF2G630346192        | 70267418 | G | 0.5  | 0.5     | A |
| 3 | BICF2P687530           | 70292683 | 0 | 0    | 0       | G |
| 3 | BICF2G630346205        | 70304250 | C | 0    | 0       | A |
| 3 | BICF2G630346215        | 70313892 | A | 0.25 | 0.2143  | G |
| 3 | BICF2G630346253        | 70328498 | G | 0    | 0       | A |
| 3 | BICF2G630346277        | 70337891 | G | 0    | 0       | A |
| 3 | BICF2G630346294        | 70352777 | G | 0.25 | 0.2143  | A |
| 3 | BICF2G630346295        | 70353088 | A | 0    | 0.2143  | T |
| 3 | BICF2G630346312        | 70362867 | G | 0    | 0       | A |
| 3 | BICF2G630346337        | 70369295 | A | 0    | 0       | G |
| 3 | BICF2G630346378        | 70385175 | A | 0.25 | 0.2143  | G |
| 3 | BICF2P984507           | 70398896 | G | 0.25 | 0.2143  | A |
| 3 | BICF2G630346400        | 70405977 | A | 0.75 | 0.6429  | G |
| 3 | BICF2P801735           | 70419734 | A | 0.75 | 0.6429  | G |
| 3 | TIGRP2P50503_rs8880756 | 70430956 | A | 0.75 | 0.6429  | C |
| 3 | BICF2G630346420        | 70442914 | G | 0    | 0       | A |
| 3 | BICF2G630346442        | 70457519 | A | 0.75 | 0.6429  | G |
| 3 | BICF2P1376419          | 70466313 | A | 0    | 0.1429  | C |
| 3 | BICF2G630346449        | 70474108 | G | 0.75 | 0.6429  | A |
| 3 | BICF2G630346466        | 70495378 | A | 0    | 0       | G |
| 3 | BICF2P534809           | 70513154 | G | 0    | 0.1429  | A |
| 3 | BICF2G630346470        | 70518642 | C | 0    | 0.08333 | A |
| 3 | BICF2P530052           | 70529662 | A | 0    | 0       | G |
| 3 | BICF2G630346481        | 70542063 | G | 0    | 0       | A |
| 3 | BICF2G630346504        | 70553341 | C | 0.25 | 0.1     | A |
| 3 | BICF2G630346524        | 70566153 | A | 0.25 | 0.2143  | G |
| 3 | TIGRP2P50542_rs9199122 | 70577496 | 0 | 0    | 0       | G |
| 3 | BICF2G630346570        | 70592503 | A | 0.25 | 0.4286  | G |
| 3 | BICF2G630346592        | 70600677 | A | 0.25 | 0.4286  | C |
| 3 | BICF2G630346621        | 70612887 | G | 1    | 1       | A |
| 3 | BICF2S23741132         | 70621871 | G | 0    | 0       | A |
| 3 | BICF2G630346633        | 70635732 | A | 0    | 0.1429  | G |
| 3 | BICF2G630346639        | 70646946 | A | 0    | 0       | G |
| 3 | BICF2G630346654        | 70659010 | A | 0    | 0       | G |
| 3 | BICF2G630346685        | 70673530 | A | 0    | 0       | G |
| 3 | BICF2G630346705        | 70683990 | A | 0.25 | 0.2857  | G |
| 3 | BICF2G630346722        | 70696592 | G | 0    | 0.2143  | A |
| 3 | BICF2G630346748        | 70705296 | G | 0    | 0       | A |
| 3 | BICF2G630346757        | 70715809 | T | 0    | 0       | A |
| 3 | BICF2G630346806        | 70726005 | A | 0    | 0       | G |
| 3 | BICF2P1305514          | 70746883 | A | 0    | 0.1429  | G |
| 3 | BICF2G630346821        | 70748090 | A | 0    | 0.1429  | G |
| 3 | BICF2G630346846        | 70765878 | A | 0    | 0       | T |
| 3 | BICF2G630346856        | 70774716 | A | 0    | 0       | G |

|   |                        |          |   |      |        |   |
|---|------------------------|----------|---|------|--------|---|
| 3 | BICF2P441522           | 70791155 | A | 0    | 0      | C |
| 3 | BICF2P441524           | 70791458 | A | 0    | 0      | T |
| 3 | BICF2P1069152          | 70798514 | A | 0    | 0.1429 | C |
| 3 | BICF2P219616           | 70815775 | A | 0    | 0.1429 | G |
| 3 | BICF2G630346906        | 70836391 | A | 0    | 0      | G |
| 3 | BICF2G630346917        | 70840759 | G | 1    | 1      | A |
| 3 | BICF2S22918373         | 70853907 | A | 0    | 0      | G |
| 3 | BICF2G630346944        | 70865137 | A | 0.5  | 0.6429 | G |
| 3 | BICF2S23338900         | 70876425 | G | 0.5  | 0.5    | A |
| 3 | BICF2G630346977        | 70903599 | A | 0.5  | 0.6429 | G |
| 3 | TIGRP2P50581_rs9033606 | 70914958 | C | 0.5  | 0.3571 | A |
| 3 | BICF2G630346994        | 70922649 | G | 0.5  | 0.6429 | A |
| 3 | TIGRP2P50592_rs8753807 | 70935976 | A | 0    | 0      | G |
| 3 | BICF2P738728           | 70939763 | G | 0.5  | 0.6429 | A |
| 3 | BICF2G630347017        | 70943959 | A | 0    | 0      | G |
| 3 | BICF2G630347036        | 70955174 | A | 0.25 | 0.3571 | G |
| 3 | BICF2S22918699         | 70973257 | C | 0.5  | 0.6429 | A |
| 3 | BICF2G630347062        | 70981310 | A | 0    | 0      | G |
| 3 | BICF2G630347110        | 70990639 | A | 0    | 0      | G |
| 3 | BICF2G630347144        | 71003477 | A | 0    | 0      | G |
| 3 | BICF2P269213           | 71019627 | G | 0.25 | 0.2143 | A |
| 3 | BICF2G630347165        | 71028495 | G | 0.25 | 0.2143 | A |
| 3 | BICF2P353800           | 71045878 | A | 0.75 | 0.5714 | C |
| 3 | BICF2G630347168        | 71051486 | G | 0    | 0      | A |
| 3 | BICF2S23120885         | 71062605 | G | 0.75 | 0.5714 | A |
| 3 | BICF2G630347177        | 71070587 | A | 0    | 0      | G |
| 3 | BICF2G630347196        | 71082011 | G | 0.75 | 0.7143 | A |
| 3 | BICF2G630347220        | 71101561 | G | 0.75 | 0.7143 | A |
| 3 | BICF2S23719507         | 71108118 | A | 0.75 | 0.7143 | G |
| 3 | BICF2G630347233        | 71116588 | C | 0.75 | 0.7143 | A |
| 3 | BICF2S22949005         | 71129633 | G | 0    | 0      | A |
| 3 | BICF2G630347243        | 71145537 | A | 0.25 | 0.4286 | C |
| 3 | BICF2G630347268        | 71151315 | G | 0.75 | 0.7857 | A |
| 3 | BICF2G630347272        | 71155871 | A | 0.75 | 0.7857 | G |
| 3 | BICF2G630347317        | 71182647 | A | 0    | 0      | G |
| 3 | BICF2G630347325        | 71188032 | A | 0    | 0      | C |
| 3 | BICF2P1319289          | 71197980 | A | 0    | 0      | C |
| 3 | BICF2P1461417          | 71214348 | G | 0    | 0      | A |
| 3 | BICF2P1007558          | 71221439 | A | 0.75 | 0.7857 | G |
| 3 | BICF2G630347341        | 71232685 | T | 0    | 0      | A |
| 3 | BICF2S23424012         | 71253392 | G | 0    | 0      | A |
| 3 | BICF2G630347342        | 71255987 | A | 0    | 0      | G |
| 3 | TIGRP2P50626_rs8682637 | 71272924 | G | 0    | 0      | A |
| 3 | BICF2P1124383          | 71281919 | A | 0    | 0      | T |
| 3 | BICF2G630347351        | 71293182 | A | 0.75 | 0.6429 | C |
| 3 | BICF2S23021807         | 71301841 | G | 0.25 | 0.2857 | A |
| 3 | BICF2G630347383        | 71322263 | A | 0.25 | 0.2143 | G |

|   |                        |          |   |      |         |   |
|---|------------------------|----------|---|------|---------|---|
| 3 | BICF2G630347384        | 71323591 | A | 0    | 0.1429  | G |
| 3 | BICF2S23238260         | 71341132 | G | 0.25 | 0.2857  | A |
| 3 | BICF2S23338505         | 71353837 | G | 0.75 | 0.5714  | A |
| 3 | BICF2P493832           | 71368891 | T | 0    | 0       | A |
| 3 | BICF2G630347399        | 71378585 | G | 0    | 0       | A |
| 3 | BICF2G630347417        | 71388170 | C | 0    | 0.1429  | A |
| 3 | BICF2G630347439        | 71395797 | G | 0    | 0.1429  | A |
| 3 | BICF2G630347463        | 71404996 | G | 0    | 0.1429  | A |
| 3 | BICF2G630347491        | 71415537 | A | 0    | 0.1429  | G |
| 3 | BICF2G630347520        | 71427205 | A | 0    | 0       | G |
| 3 | BICF2P72337            | 71445387 | G | 1    | 0.8571  | A |
| 3 | BICF2P432596           | 71453898 | A | 0.25 | 0.2857  | T |
| 3 | BICF2G630347578        | 71468137 | A | 0.25 | 0.2857  | G |
| 3 | BICF2P221716           | 71475304 | A | 0.25 | 0.4167  | G |
| 3 | BICF2G630347622        | 71487729 | A | 0.25 | 0.4286  | G |
| 3 | BICF2P365699           | 71496977 | G | 0.25 | 0.4286  | A |
| 3 | BICF2S2303708          | 71527181 | A | 0    | 0.1429  | G |
| 3 | BICF2G630347627        | 71538386 | A | 1    | 0.8571  | C |
| 3 | TIGRP2P50724_rs8961586 | 71541987 | G | 0    | 0.1429  | A |
| 3 | BICF2P992012           | 71555943 | G | 0    | 0.1429  | A |
| 3 | BICF2G630347652        | 71568191 | A | 0    | 0       | G |
| 3 | BICF2G630347666        | 71573298 | A | 0.5  | 0.5     | G |
| 3 | BICF2G630347692        | 71583344 | G | 0.5  | 0.5     | A |
| 3 | BICF2G630347699        | 71587787 | A | 0.5  | 0.5     | G |
| 3 | BICF2G630347737        | 71600779 | A | 0.5  | 0.5     | G |
| 3 | BICF2P217260           | 71613837 | 0 | 0    | 0       | A |
| 3 | BICF2G630347746        | 71624503 | G | 0.5  | 0.5     | A |
| 3 | BICF2G630347756        | 71641175 | G | 0    | 0.1429  | A |
| 3 | BICF2G630347769        | 71646796 | A | 0    | 0.08333 | G |
| 3 | BICF2P121267           | 71657451 | C | 0    | 0       | A |
| 3 | BICF2G630347779        | 71668200 | C | 0.25 | 0.3571  | A |
| 3 | BICF2G630347788        | 71688922 | A | 0    | 0.1429  | G |
| 3 | BICF2G630347794        | 71702440 | A | 0    | 0.1429  | G |
| 3 | BICF2G630347798        | 71707174 | G | 0.75 | 0.5714  | A |
| 3 | BICF2P444394           | 71709260 | C | 0.75 | 0.5714  | A |
| 3 | BICF2G630347814        | 71719914 | G | 0    | 0       | A |
| 3 | BICF2G630347836        | 71736803 | G | 0    | 0.1429  | A |
| 3 | BICF2G630347841        | 71737753 | A | 1    | 0.8571  | G |
| 3 | BICF2G630347859        | 71751778 | G | 0.5  | 0.5     | A |
| 3 | BICF2G630347872        | 71760916 | A | 0.5  | 0.5     | G |
| 3 | BICF2S23548534         | 71772975 | C | 0.25 | 0.2143  | G |
| 3 | BICF2S23548535         | 71772992 | A | 0.25 | 0.2143  | G |
| 3 | BICF2S23548540         | 71773212 | A | 0.25 | 0.2143  | G |
| 3 | BICF2P770452           | 71787096 | 0 | 0    | 0       | C |
| 3 | TIGRP2P50780_rs8719116 | 71800066 | 0 | 0    | 0       | G |
| 3 | BICF2G630347886        | 71815398 | A | 0.5  | 0.5     | G |
| 3 | BICF2G630347890        | 71821018 | A | 0.5  | 0.5     | G |

|   |                        |          |   |      |        |   |
|---|------------------------|----------|---|------|--------|---|
| 3 | BICF2G630347902        | 71829153 | G | 0.25 | 0.2857 | A |
| 3 | BICF2G630347930        | 71856931 | G | 0.75 | 0.5714 | A |
| 3 | BICF2G630347951        | 71870691 | A | 0    | 0      | G |
| 3 | BICF2G630347953        | 71870968 | G | 0    | 0      | A |
| 3 | BICF2P1468025          | 71879154 | G | 0    | 0      | A |
| 3 | BICF2P557472           | 71896408 | G | 0.75 | 0.7857 | A |
| 3 | BICF2P869960           | 71898732 | A | 0.75 | 0.7857 | G |
| 3 | BICF2P1109292          | 71912261 | A | 0    | 0      | T |
| 3 | BICF2P60654            | 71923771 | A | 0    | 0      | G |
| 3 | BICF2P615665           | 71932535 | G | 0    | 0      | A |
| 3 | BICF2P1272848          | 71948543 | G | 0    | 0      | A |
| 3 | BICF2P330663           | 71959362 | 0 | 0    | 0      | G |
| 3 | TIGRP2P50831_rs8956749 | 71973132 | G | 0    | 0      | A |
| 3 | TIGRP2P50833_rs8932257 | 71982066 | C | 0    | 0      | G |
| 3 | BICF2P178053           | 71996218 | A | 0.5  | 0.5    | G |
| 3 | TIGRP2P50846_rs8702602 | 72005779 | A | 0    | 0      | C |
| 3 | BICF2P1127874          | 72015450 | A | 0    | 0      | G |
| 3 | BICF2P9173             | 72034203 | A | 0    | 0      | G |
| 3 | BICF2P625852           | 72038826 | 0 | 0    | 0      | A |
| 3 | BICF2P566461           | 72051166 | 0 | 0    | 0      | G |
| 3 | BICF2S22954802         | 72064496 | A | 0.5  | 0.5    | C |
| 3 | BICF2P228774           | 72073318 | A | 0    | 0      | G |
| 3 | BICF2P1192071          | 72093129 | G | 0.5  | 0.5    | A |
| 3 | BICF2S23732589         | 72098850 | G | 0.5  | 0.5    | A |
| 3 | BICF2S2321653          | 72113424 | A | 0.5  | 0.5    | T |
| 3 | TIGRP2P50882_rs8551791 | 72119854 | G | 0.5  | 0.5    | A |
| 3 | BICF2P242241           | 72129624 | A | 0.5  | 0.5    | G |
| 3 | BICF2P1392927          | 72148949 | A | 0.75 | 0.6429 | G |
| 3 | BICF2P667799           | 72153585 | A | 0.25 | 0.2143 | G |
| 3 | TIGRP2P50911_rs8594995 | 72164164 | A | 0    | 0      | G |
| 3 | TIGRP2P50914_rs9094815 | 72183994 | C | 0.5  | 0.3571 | A |
| 3 | BICF2P1072780          | 72193443 | A | 0.25 | 0.2857 | G |
| 3 | BICF2S23318793         | 72203466 | A | 0.25 | 0.2143 | G |
| 3 | BICF2P395650           | 72208959 | G | 0.5  | 0.5    | A |
| 3 | BICF2P923795           | 72223819 | G | 0.25 | 0.2857 | A |
| 3 | BICF2S2366662          | 72225068 | A | 0.25 | 0.2857 | G |
| 3 | BICF2S235409           | 72231761 | A | 0    | 0      | G |
| 3 | BICF2S23145647         | 72246471 | A | 0.25 | 0.2857 | C |
| 3 | BICF2P961864           | 72274592 | 0 | 0    | 0      | A |
| 3 | TIGRP2P50941_rs9148102 | 72284943 | G | 0    | 0      | A |
| 3 | BICF2P1016747          | 72298148 | 0 | 0    | 0      | G |
| 3 | BICF2P1468191          | 72307188 | A | 0.25 | 0.2857 | G |
| 3 | BICF2P708664           | 72313899 | 0 | 0    | 0      | G |
| 3 | BICF2S23060671         | 72332273 | G | 0.75 | 0.5714 | A |
| 3 | BICF2S2445407          | 72340915 | 0 | 0    | 0      | G |
| 3 | BICF2P1135229          | 72353255 | G | 0.75 | 0.5714 | A |
| 3 | BICF2P957428           | 72369230 | A | 0.5  | 0.3571 | C |

|   |                        |          |   |      |        |   |
|---|------------------------|----------|---|------|--------|---|
| 3 | BICF2P1333491          | 72370758 | A | 0.5  | 0.3571 | G |
| 3 | BICF2P243267           | 72381996 | A | 0.5  | 0.3571 | G |
| 3 | BICF2P360283           | 72402830 | A | 0    | 0      | G |
| 3 | BICF2P1052561          | 72404255 | A | 0    | 0      | G |
| 3 | BICF2S23454836         | 72425599 | 0 | 0    | 0      | A |
| 3 | BICF2P1136548          | 72432601 | A | 0    | 0      | G |
| 3 | BICF2P1301995          | 72441308 | A | 0    | 0      | T |
| 3 | BICF2S23248707         | 72453034 | T | 0    | 0      | A |
| 3 | BICF2P1406464          | 72466455 | G | 0    | 0      | C |
| 3 | BICF2S23660412         | 72494744 | A | 0    | 0      | G |
| 3 | BICF2S2325069          | 72501056 | A | 0    | 0      | G |
| 3 | BICF2P378404           | 72525542 | A | 0    | 0      | G |
| 3 | BICF2P340157           | 72532661 | 0 | 0    | 0      | A |
| 3 | BICF2P1068900          | 72544096 | A | 0    | 0      | G |
| 3 | BICF2P930535           | 72559605 | A | 0    | 0      | G |
| 3 | BICF2P788663           | 72575868 | G | 0    | 0      | A |
| 3 | BICF2P1379863          | 72596815 | A | 0    | 0.1429 | G |
| 3 | BICF2S22916658         | 72608124 | G | 0.25 | 0.2143 | A |
| 3 | BICF2P610015           | 72611617 | 0 | 0    | 0      | A |
| 3 | BICF2P1238123          | 72631735 | C | 0.25 | 0.3571 | G |
| 3 | TIGRP2P51004_rs8687942 | 72636084 | C | 0.25 | 0.3571 | A |
| 3 | BICF2P1392344          | 72646112 | A | 0.75 | 0.6429 | G |
| 3 | BICF2S23010369         | 72654000 | A | 0.75 | 0.6429 | T |
| 3 | BICF2P873500           | 72663570 | A | 0.25 | 0.2143 | G |
| 3 | BICF2P461716           | 72666187 | G | 0.75 | 0.7857 | A |
| 3 | BICF2S23516817         | 72690768 | G | 0.75 | 0.7857 | A |
| 3 | BICF2P96174            | 72695282 | G | 0.75 | 0.6429 | A |
| 3 | BICF2P825759           | 72704274 | A | 0.75 | 0.7857 | C |
| 3 | BICF2S23248106         | 72722088 | G | 0.75 | 0.7857 | A |
| 3 | BICF2P521131           | 72727082 | A | 0    | 0.1429 | G |
| 3 | BICF2P183632           | 72746555 | G | 0    | 0.1429 | A |
| 3 | BICF2P170895           | 72754703 | 0 | 0    | 0      | A |
| 3 | BICF2P420058           | 72763866 | G | 0.75 | 0.7857 | A |
| 3 | BICF2P894119           | 72772508 | G | 0    | 0.1429 | A |
| 3 | BICF2P1100109          | 72784438 | C | 0    | 0.1429 | A |
| 3 | BICF2P261633           | 72806259 | A | 0    | 0      | G |
| 3 | BICF2P261632           | 72807411 | A | 0    | 0      | G |
| 3 | BICF2P605847           | 72826897 | G | 0.75 | 0.6429 | C |
| 3 | TIGRP2P51037_rs9166790 | 72832353 | C | 0    | 0.1429 | A |
| 3 | BICF2P470927           | 72841282 | A | 0    | 0      | G |
| 3 | BICF2P545282           | 72857689 | G | 0    | 0      | C |
| 3 | BICF2S23147554         | 72868505 | 0 | 0    | 0      | G |
| 3 | BICF2P80520            | 72875831 | A | 0.5  | 0.5    | C |
| 3 | BICF2S2374352          | 72887814 | A | 0.5  | 0.5    | G |
| 3 | BICF2P947946           | 72892536 | G | 0.5  | 0.5    | C |
| 3 | BICF2P1119585          | 72905638 | C | 0.25 | 0.2143 | A |
| 3 | BICF2P713236           | 72931950 | A | 0.25 | 0.2143 | G |



|   |                        |          |   |      |        |   |
|---|------------------------|----------|---|------|--------|---|
| 3 | BICF2P1438424          | 72941299 | G | 0.75 | 0.5714 | A |
| 3 | TIGRP2P51100_rs9163137 | 72945605 | G | 0    | 0      | A |
| 3 | BICF2P709410           | 72960253 | A | 0.75 | 0.5714 | G |
| 3 | BICF2P312351           | 72967639 | A | 0.5  | 0.3571 | G |
| 3 | TIGRP2P51108_rs9153785 | 72990414 | A | 0    | 0      | C |
| 3 | BICF2P1401786          | 73000579 | A | 0.75 | 0.7143 | G |
| 3 | BICF2S22927352         | 73001936 | A | 0.75 | 0.7143 | G |
| 3 | TIGRP2P51122_rs8719003 | 73020643 | G | 0.75 | 0.7143 | A |
| 3 | TIGRP2P51126_rs8638818 | 73025435 | A | 0.75 | 0.6429 | G |
| 3 | BICF2P1327535          | 73037104 | T | 0.75 | 0.6429 | A |
| 3 | BICF2P1252199          | 73058693 | A | 0.75 | 0.7857 | G |
| 3 | BICF2P1377845          | 73062129 | G | 0.5  | 0.5833 | A |
| 3 | BICF2P896521           | 73071513 | A | 0    | 0      | C |
| 3 | BICF2P808591           | 73085096 | A | 0    | 0      | C |
| 3 | BICF2P196588           | 73093046 | A | 0.75 | 0.6429 | C |
| 3 | TIGRP2P51172_rs8992730 | 73097368 | A | 0.25 | 0.2143 | G |
| 3 | BICF2S23014059         | 73106086 | A | 0    | 0      | G |
| 3 | BICF2S2328793          | 73117143 | C | 0    | 0.1429 | A |
| 3 | BICF2P1448320          | 73141562 | A | 0    | 0.1429 | G |
| 3 | BICF2P1363449          | 73159735 | G | 1    | 1      | A |
| 3 | BICF2P1174412          | 73164522 | A | 1    | 1      | G |
| 3 | BICF2P946015           | 73177829 | G | 1    | 0.9167 | A |
| 3 | TIGRP2P51213_rs9048321 | 73192459 | T | 0.25 | 0.2857 | A |
| 3 | BICF2P426848           | 73204747 | A | 0.25 | 0.2857 | C |
| 3 | BICF2P1050238          | 73223479 | A | 0    | 0      | C |
| 3 | G258f9S223             | 73264264 | G | 0    | 0.1429 | A |
| 3 | BICF2S23138930         | 73308714 | A | 0    | 0      | G |
| 3 | BICF2P1180402          | 73315471 | G | 0    | 0      | A |
| 3 | TIGRP2P51273_rs8750177 | 73338962 | A | 0    | 0      | T |
| 3 | BICF2P781101           | 73347280 | 0 | 0    | 0      | A |
| 3 | BICF2P354818           | 73376035 | A | 0.5  | 0.5    | C |
| 3 | BICF2P1047844          | 73397081 | G | 0    | 0      | A |
| 3 | BICF2P979666           | 73446002 | 0 | 0    | 0      | A |
| 3 | BICF2P794473           | 73471353 | A | 0    | 0.1429 | G |
| 3 | TIGRP2P51291_rs9194575 | 73480519 | 0 | 0    | 0      | G |
| 3 | BICF2P1133744          | 73495967 | G | 1    | 0.8571 | A |
| 3 | BICF2P3479             | 73502785 | G | 1    | 0.8571 | A |
| 3 | BICF2S2413222          | 73515498 | G | 0    | 0.1429 | A |
| 3 | BICF2P834603           | 73515695 | A | 0    | 0.1429 | G |
| 3 | BICF2P1023666          | 73522218 | A | 0    | 0.1429 | G |
| 3 | BICF2P1167144          | 73525040 | A | 0    | 0.1429 | G |
| 3 | BICF2P982426           | 73544442 | A | 0.75 | 0.6429 | G |
| 3 | BICF2S23731276         | 73560324 | A | 0.25 | 0.3571 | G |
| 3 | BICF2P873286           | 73571000 | G | 0.25 | 0.3571 | A |
| 3 | BICF2P939079           | 73578399 | A | 0    | 0.1429 | G |
| 3 | BICF2P659016           | 73596196 | A | 0.25 | 0.4286 | G |
| 3 | TIGRP2P51334_rs8862149 | 73597780 | G | 0.25 | 0.4286 | A |

|   |                        |          |   |      |        |   |
|---|------------------------|----------|---|------|--------|---|
| 3 | TIGRP2P51338_rs9018373 | 73607697 | G | 0.25 | 0.4286 | A |
| 3 | BICF2P632475           | 73618543 | A | 0.25 | 0.4286 | G |
| 3 | TIGRP2P51350_rs8849029 | 73626967 | G | 0    | 0.1429 | A |
| 3 | BICF2P890578           | 73627212 | A | 0    | 0.1429 | G |
| 3 | BICF2P11678            | 73636617 | A | 0    | 0      | G |
| 3 | BICF2P1445689          | 73649181 | A | 0.75 | 0.7143 | T |
| 3 | BICF2P6967             | 73662071 | A | 0.25 | 0.2857 | G |
| 3 | BICF2S23221558         | 73673799 | A | 0    | 0      | G |
| 3 | BICF2P281036           | 73688175 | A | 0.5  | 0.3571 | G |
| 3 | BICF2S23146789         | 73698381 | G | 0.25 | 0.3571 | A |
| 3 | BICF2P954856           | 73703936 | G | 0.5  | 0.5    | A |
| 3 | G259f43S141            | 73729311 | A | 0.5  | 0.5    | G |
| 3 | BICF2P90273            | 73755990 | A | 0.5  | 0.5    | G |
| 3 | BICF2P1037985          | 73769188 | C | 0    | 0      | A |
| 3 | BICF2P1119519          | 73780207 | 0 | 0    | 0      | G |
| 3 | BICF2S23255725         | 73784960 | G | 0.5  | 0.5    | A |
| 3 | BICF2P728232           | 73807753 | C | 0    | 0      | G |
| 3 | BICF2P728233           | 73807904 | C | 0    | 0      | A |
| 3 | BICF2P180998           | 73828246 | G | 0    | 0      | A |
| 3 | BICF2P1370573          | 73833402 | A | 0    | 0      | G |
| 3 | BICF2P581198           | 73839482 | G | 0    | 0      | A |
| 3 | BICF2P1172461          | 73843085 | 0 | 0    | 0      | G |
| 3 | BICF2P69130            | 73863730 | A | 0    | 0      | G |
| 3 | BICF2P296071           | 73869145 | A | 0.5  | 0.5    | C |
| 3 | BICF2S23143105         | 73883322 | A | 0    | 0      | G |
| 3 | BICF2S23018094         | 73889266 | T | 0.5  | 0.5    | A |
| 3 | BICF2P778817           | 73902672 | C | 0.25 | 0.2857 | A |
| 3 | TIGRP2P51430_rs8695788 | 73920450 | A | 0    | 0      | C |
| 3 | TIGRP2P51431_rs8842193 | 73923070 | 0 | 0    | 0      | A |
| 3 | BICF2P1066162          | 73944748 | 0 | 0    | 0      | G |
| 3 | BICF2S23341988         | 73946266 | G | 0.75 | 0.6429 | C |
| 3 | BICF2S23027829         | 73962149 | G | 1    | 0.8571 | A |
| 3 | BICF2P81375            | 73972394 | A | 0.5  | 0.5    | G |
| 3 | BICF2P29133            | 73981180 | G | 0.25 | 0.2857 | A |
| 3 | BICF2P257902           | 73998075 | A | 0.25 | 0.3571 | G |
| 3 | BICF2P1304854          | 74003993 | A | 0.5  | 0.5    | G |
| 3 | BICF2P916246           | 74016375 | A | 0.5  | 0.5    | G |
| 3 | BICF2P124436           | 74023926 | A | 0.5  | 0.4167 | G |
| 3 | BICF2P734792           | 74026387 | G | 0.5  | 0.5    | A |
| 3 | BICF2S2443102          | 74047624 | G | 0.25 | 0.2143 | A |
| 3 | BICF2P8218             | 74055408 | 0 | 0    | 0      | C |
| 3 | BICF2S23713529         | 74074557 | A | 0    | 0      | G |
| 3 | BICF2S23055151         | 74085609 | G | 0.25 | 0.2857 | A |
| 3 | BICF2S22951811         | 74104472 | A | 0.5  | 0.375  | G |
| 3 | BICF2S239917           | 74108087 | C | 0.25 | 0.4286 | A |
| 3 | BICF2S23037351         | 74127585 | A | 0.25 | 0.2143 | G |
| 3 | TIGRP2P51453_rs8489444 | 74136356 | C | NA   | 0.3333 | A |

|   |                        |          |   |      |        |   |
|---|------------------------|----------|---|------|--------|---|
| 3 | BICF2P855213           | 74161596 | A | 0    | 0      | C |
| 3 | BICF2P358326           | 74174311 | G | 0    | 0      | A |
| 3 | BICF2S23236572         | 74189324 | G | 0    | 0      | A |
| 3 | BICF2S23319791         | 74220247 | C | 0    | 0      | G |
| 3 | BICF2G630347978        | 74230710 | A | 0.5  | 0.3571 | C |
| 3 | BICF2G630347979        | 74233163 | C | 0.5  | 0.6429 | A |
| 3 | BICF2G630348010        | 74259093 | G | 0    | 0      | A |
| 3 | BICF2G630348051        | 74273641 | A | 0    | 0      | G |
| 3 | TIGRP2P51459_rs9041828 | 74285157 | 0 | 0    | 0      | A |
| 3 | BICF2G630348067        | 74290766 | A | 0    | 0      | G |
| 3 | BICF2G630348101        | 74305180 | G | 0    | 0      | A |
| 3 | BICF2G630348129        | 74313818 | A | 0    | 0      | G |
| 3 | BICF2G630348153        | 74325989 | A | 0    | 0      | G |
| 3 | TIGRP2P51461_rs8628566 | 74338531 | A | 0    | 0      | G |
| 3 | BICF2G630348194        | 74351297 | G | 1    | 1      | A |
| 3 | BICF2G630348211        | 74360719 | A | 0.5  | 0.6429 | G |
| 3 | BICF2G630348227        | 74376285 | G | 1    | 1      | A |
| 3 | BICF2G630348235        | 74382533 | A | 0.75 | 0.6429 | G |
| 3 | BICF2S22958901         | 74397432 | A | 0.75 | 0.6429 | G |
| 3 | BICF2S23034985         | 74416816 | G | 0.75 | 0.7143 | A |
| 3 | BICF2P528832           | 74435389 | A | 0.25 | 0.2857 | G |
| 3 | BICF2P245826           | 74444030 | G | 0.25 | 0.3571 | A |
| 3 | TIGRP2P51482_rs9049112 | 74459311 | A | 0.75 | 0.6429 | G |
| 3 | BICF2G630348282        | 74464384 | A | 0    | 0      | C |
| 3 | BICF2G630348283        | 74465961 | A | 0    | 0      | G |
| 3 | BICF2P335747           | 74476842 | G | 0.5  | 0.3571 | A |
| 3 | BICF2G630348291        | 74494813 | A | 1    | 0.8571 | G |
| 3 | BICF2G630348304        | 74505349 | G | 0.25 | 0.4286 | A |
| 3 | BICF2P417767           | 74517809 | G | 0    | 0.1429 | A |
| 3 | BICF2G630348308        | 74523478 | A | 0.25 | 0.4286 | G |
| 3 | BICF2G630348339        | 74535183 | A | 0    | 0      | G |
| 3 | BICF2P705542           | 74536246 | G | 0.5  | 0.3571 | A |
| 3 | BICF2G630348347        | 74538486 | G | 0.25 | 0.2857 | A |
| 3 | BICF2G630348359        | 74547958 | C | 0    | 0      | G |
| 3 | BICF2G630348375        | 74556961 | A | 0.75 | 0.6429 | G |
| 3 | BICF2P1433760          | 74570209 | A | 0.75 | 0.6429 | T |
| 3 | BICF2P1435022          | 74575003 | A | 0.5  | 0.7    | G |
| 3 | BICF2G630348400        | 74580325 | A | 0.75 | 0.7857 | G |
| 3 | BICF2S22913713         | 74597055 | G | 0    | 0      | A |
| 3 | BICF2S232997           | 74601227 | A | 0.5  | 0.5    | G |
| 3 | BICF2G630348432        | 74612235 | A | 0.75 | 0.5714 | G |
| 3 | BICF2G630348441        | 74624197 | A | 0    | 0.25   | C |
| 3 | BICF2P1232035          | 74646455 | A | 0.25 | 0.4286 | G |
| 3 | BICF2P712567           | 74655067 | G | 1    | 0.8571 | A |
| 3 | BICF2G630348457        | 74655694 | A | 0    | 0      | G |
| 3 | BICF2G630348459        | 74657432 | A | 0    | 0      | C |
| 3 | BICF2G630348466        | 74665486 | A | 0    | 0      | G |

|   |                        |          |   |      |        |   |
|---|------------------------|----------|---|------|--------|---|
| 3 | BICF2G630348474        | 74679563 | A | 1    | 0.8571 | G |
| 3 | BICF2G630348488        | 74686683 | C | 0    | 0      | A |
| 3 | BICF2G630348501        | 74696125 | G | 1    | 0.8571 | A |
| 3 | BICF2G630348518        | 74708966 | A | 1    | 0.8571 | G |
| 3 | BICF2S23549679         | 74724867 | G | 1    | 0.9167 | A |
| 3 | BICF2P1080484          | 74743010 | G | 0    | 0      | A |
| 3 | BICF2P39201            | 74764009 | G | 0    | 0      | A |
| 3 | BICF2P1158700          | 74787893 | G | 0    | 0      | A |
| 3 | BICF2G630348527        | 74803723 | 0 | 0    | 0      | G |
| 3 | BICF2G630348528        | 74808188 | A | 0.25 | 0.2857 | G |
| 3 | BICF2P337164           | 74821246 | A | 0.75 | 0.7857 | G |
| 3 | BICF2G630348552        | 74834524 | G | 0.25 | 0.4286 | A |
| 3 | TIGRP2P51612_rs8726259 | 74850629 | G | 0    | 0      | A |
| 3 | BICF2P1446224          | 74863193 | G | 0.5  | 0.6429 | A |
| 3 | BICF2P1016209          | 74877912 | A | 0.25 | 0.2143 | G |
| 3 | BICF2S2331039          | 74892123 | C | 0.25 | 0.4286 | A |
| 3 | BICF2G630348560        | 74901970 | G | 0.25 | 0.2143 | A |
| 3 | BICF2P1291068          | 74916812 | T | 0.5  | 0.3571 | A |
| 3 | TIGRP2P51626_rs8771887 | 74923533 | 0 | 0    | 0      | G |
| 3 | BICF2P420002           | 74943960 | 0 | 0    | 0      | A |
| 3 | BICF2G630348561        | 74947509 | 0 | 0    | 0      | C |
| 3 | BICF2G630348576        | 74957735 | A | 0.5  | 0.5    | G |
| 3 | BICF2S23332395         | 74976281 | G | 1    | 0.8571 | A |
| 3 | BICF2G630348578        | 74982720 | 0 | 0    | 0      | G |
| 3 | BICF2P272681           | 75001794 | T | 0    | 0      | A |
| 3 | BICF2S23335442         | 75021255 | T | 0.25 | 0.3333 | A |
| 3 | BICF2S23748055         | 75029902 | A | 0.5  | 0.3571 | G |
| 3 | BICF2S23055790         | 75044834 | C | 0.25 | 0.2857 | A |
| 3 | BICF2P961084           | 75058536 | G | 1    | 0.8571 | A |
| 3 | BICF2P332981           | 75074539 | A | 0    | 0.1429 | G |
| 3 | BICF2S23027120         | 75084547 | A | 0    | 0.1429 | G |
| 3 | BICF2S23342718         | 75096037 | A | 0.5  | 0.3571 | C |
| 3 | BICF2P66747            | 75119943 | C | 0    | 0      | A |
| 3 | BICF2P1215949          | 75135006 | G | 0.25 | 0.2143 | A |
| 3 | BICF2P1260092          | 75147101 | A | 0.25 | 0.3571 | C |
| 3 | BICF2G630348586        | 75163574 | A | 0.25 | 0.2857 | G |
| 3 | BICF2P830792           | 75165239 | A | 0.25 | 0.3571 | T |
| 3 | BICF2G630348588        | 75176143 | G | 0.5  | 0.3571 | A |
| 3 | BICF2P30779            | 75202718 | A | 0    | 0.1667 | C |
| 3 | TIGRP2P51664_rs9040587 | 75232997 | 0 | 0    | 0      | G |
| 3 | BICF2G630348608        | 75251825 | A | 0    | 0      | G |
| 3 | BICF2G630348613        | 75264196 | A | 0.5  | 0.5    | G |
| 3 | BICF2G630348620        | 75271134 | A | 0.25 | 0.2857 | C |
| 3 | BICF2P281021           | 75279795 | 0 | 0    | 0      | C |
| 3 | BICF2S23142730         | 75308206 | A | 0.5  | 0.5    | G |
| 3 | BICF2P511640           | 75327306 | 0 | 0    | 0      | A |
| 3 | BICF2P830303           | 75339207 | 0 | 0    | 0      | C |

|   |                        |          |   |      |        |   |
|---|------------------------|----------|---|------|--------|---|
| 3 | BICF2G630348651        | 75363304 | G | 0.75 | 0.7857 | A |
| 3 | BICF2G630348662        | 75382092 | A | 0.75 | 0.7857 | G |
| 3 | BICF2P1029559          | 75385573 | G | 0    | 0      | A |
| 3 | TIGRP2P51665_rs8909172 | 75399202 | 0 | 0    | 0      | G |
| 3 | BICF2G630348671        | 75415141 | A | 0.25 | 0.4286 | G |
| 3 | BICF2G630348680        | 75424473 | G | 0.25 | 0.4286 | A |
| 3 | BICF2G630348681        | 75429157 | A | 0.25 | 0.4286 | G |
| 3 | BICF2G630348693        | 75453798 | G | 0.25 | 0.4286 | A |
| 3 | BICF2G630348696        | 75465521 | 0 | 0    | 0      | G |
| 3 | BICF2G630348703        | 75476379 | 0 | 0    | 0      | A |
| 3 | BICF2G630348705        | 75486320 | A | 0.25 | 0.4286 | G |
| 3 | BICF2G630348712        | 75501321 | G | 0.25 | 0.4286 | A |
| 3 | BICF2G630348726        | 75518355 | A | 0.25 | 0.4286 | G |
| 3 | BICF2G630348740        | 75528018 | 0 | 0    | 0      | A |
| 3 | BICF2G630348753        | 75534860 | A | 1    | 1      | C |
| 3 | BICF2P159353           | 75548207 | 0 | 0    | 0      | A |
| 3 | BICF2G630348780        | 75557345 | A | 0.25 | 0.4286 | G |
| 3 | BICF2G630348802        | 75594176 | A | 0.75 | 0.7857 | C |
| 3 | BICF2G630348809        | 75608168 | A | 1    | 0.9167 | C |
| 3 | BICF2G630348813        | 75612783 | A | 0.5  | 0.5    | G |
| 3 | BICF2G630348832        | 75625821 | G | 0.5  | 0.5    | A |
| 3 | BICF2G630348853        | 75639428 | A | 0.5  | 0.5    | G |
| 3 | BICF2G630348856        | 75645309 | 0 | 0    | 0      | G |
| 3 | BICF2G630348862        | 75664237 | A | 0.5  | 0.5    | G |
| 3 | TIGRP2P51678_rs9103452 | 75670037 | 0 | 0    | 0      | A |
| 3 | BICF2P496561           | 75691772 | 0 | 0    | 0      | G |
| 3 | BICF2P1177787          | 75703008 | 0 | 0    | 0      | A |
| 3 | BICF2P758757           | 75713382 | A | 0.75 | 0.5714 | T |
| 3 | BICF2P69899            | 75722321 | 0 | 0    | 0      | A |
| 3 | BICF2P10422            | 75736804 | 0 | 0    | 0      | G |
| 3 | TIGRP2P51697_rs9130909 | 75741694 | C | 0.75 | 0.5714 | A |
| 3 | BICF2G630348870        | 75760819 | 0 | 0    | 0      | C |
| 3 | BICF2G630348872        | 75763252 | A | 0    | 0.1429 | C |
| 3 | BICF2G630348887        | 75774686 | A | 0    | 0.1429 | G |
| 3 | BICF2P1285271          | 75790936 | 0 | 0    | 0      | G |
| 3 | BICF2G630348906        | 75803421 | A | 0    | 0      | G |
| 3 | BICF2G630348909        | 75814564 | G | 0    | 0      | A |
| 3 | BICF2S23039999         | 75837390 | A | 0    | 0      | G |
| 3 | BICF2P622973           | 75850042 | G | 0.5  | 0.5    | A |
| 3 | TIGRP2P51704_rs8494220 | 75861173 | 0 | 0    | 0      | G |
| 3 | BICF2G630348931        | 75869864 | G | 0.25 | 0.3571 | A |
| 3 | TIGRP2P51712_rs9152073 | 75888387 | A | 0    | 0      | G |
| 3 | BICF2P60427            | 75900261 | G | 0    | 0      | A |
| 3 | TIGRP2P51720_rs9084682 | 75921529 | A | 0    | 0      | T |
| 3 | TIGRP2P51722_rs8677777 | 75924666 | 0 | 0    | 0      | G |
| 3 | BICF2P208763           | 75938480 | A | 0    | 0      | G |
| 3 | BICF2G630348954        | 75946371 | A | 0    | 0      | G |

|   |                        |          |   |      |        |   |
|---|------------------------|----------|---|------|--------|---|
| 3 | TIGRP2P51730_rs9081380 | 75963298 | A | 0    | 0      | G |
| 3 | BICF2P879946           | 75974378 | G | 0    | 0      | A |
| 3 | BICF2S23055054         | 75983366 | A | 0    | 0      | G |
| 3 | BICF2S23423331         | 75994661 | A | 0.5  | 0.3333 | G |
| 3 | BICF2P1160261          | 76009002 | A | 0.5  | 0.3333 | G |
| 3 | TIGRP2P51747_rs8880370 | 76018571 | A | 0    | 0      | C |
| 3 | BICF2P971557           | 76028632 | G | 0.5  | 0.3571 | A |
| 3 | BICF2P508493           | 76038030 | G | 0.5  | 0.3571 | A |
| 3 | BICF2P158199           | 76064227 | 0 | 0    | 0      | G |
| 3 | BICF2G630348959        | 76088384 | A | 0.5  | 0.5    | C |
| 3 | BICF2P668082           | 76108602 | A | 0    | 0      | T |
| 3 | BICF2P783171           | 76145366 | 0 | 0    | 0      | T |
| 3 | BICF2G630348964        | 76153739 | C | 0    | 0.1429 | A |
| 3 | BICF2G630348969        | 76170598 | C | 0.75 | 0.5714 | A |
| 3 | BICF2P432339           | 76190131 | G | 0    | 0      | A |
| 3 | TIGRP2P51796_rs9160734 | 76216782 | A | 0    | 0      | G |
| 3 | BICF2G630348974        | 76224598 | A | 0.5  | 0.5    | G |
| 3 | BICF2G630349009        | 76236837 | G | 0.75 | 0.7143 | A |
| 3 | TIGRP2P51809_rs9131941 | 76245472 | A | 0    | 0      | G |
| 3 | BICF2G630349050        | 76264351 | A | 1    | 0.8571 | G |
| 3 | BICF2G630349065        | 76268380 | G | 1    | 0.8571 | A |
| 3 | TIGRP2P51811_rs8899455 | 76280705 | A | 0.5  | 0.3571 | G |
| 3 | BICF2G630349110        | 76314243 | G | 0.5  | 0.3571 | A |
| 3 | BICF2S23350455         | 76330010 | A | 0.5  | 0.3571 | G |
| 3 | BICF2G630349119        | 76358704 | C | 0    | 0      | G |
| 3 | BICF2P535165           | 76363428 | A | 0    | 0      | G |
| 3 | BICF2P684422           | 76372063 | A | 0.75 | 0.7857 | G |
| 3 | BICF2P1164341          | 76398500 | A | 0.5  | 0.3571 | G |
| 3 | TIGRP2P51864_rs8694831 | 76398656 | A | 0    | 0      | G |
| 3 | BICF2G630349127        | 76409636 | A | 0    | 0      | G |
| 3 | BICF2G630349145        | 76421633 | A | 0    | 0      | G |
| 3 | BICF2P628966           | 76432944 | G | 0.5  | 0.5    | A |
| 3 | BICF2S23156690         | 76464697 | G | 0.75 | 0.7857 | A |
| 3 | BICF2G630349156        | 76477343 | A | 0    | 0      | G |
| 3 | BICF2G630349158        | 76491101 | A | 0    | 0      | G |
| 3 | BICF2P1256783          | 76501278 | G | 0.25 | 0.4286 | A |
| 3 | BICF2G630349187        | 76511018 | A | 0    | 0      | G |
| 3 | TIGRP2P51897_rs8761598 | 76528237 | G | 1    | 0.8571 | A |
| 3 | BICF2P629516           | 76534139 | A | 0    | 0.1429 | G |
| 3 | BICF2S23635067         | 76549026 | G | 0.75 | 0.5714 | A |
| 3 | BICF2G630349208        | 76556394 | 0 | 0    | 0      | G |
| 3 | BICF2P1303810          | 76569069 | A | 0    | 0      | G |
| 3 | BICF2G630349242        | 76585862 | A | 0    | 0      | G |
| 3 | BICF2G630349258        | 76591546 | G | 0    | 0      | A |
| 3 | BICF2G630349288        | 76603385 | A | 0    | 0      | G |
| 3 | BICF2G630349313        | 76616736 | C | 0.75 | 0.5714 | A |
| 3 | BICF2G630349321        | 76627986 | A | 0.75 | 0.5714 | G |

|   |                        |          |   |      |        |   |
|---|------------------------|----------|---|------|--------|---|
| 3 | BICF2G630349344        | 76647136 | G | 0.75 | 0.5714 | A |
| 3 | BICF2G630349388        | 76670427 | G | 0.5  | 0.6429 | A |
| 3 | BICF2G630349414        | 76686949 | G | 0    | 0.1429 | C |
| 3 | BICF2S23021560         | 76687591 | A | 0.5  | 0.5    | C |
| 3 | BICF2G630349419        | 76695044 | G | 0    | 0      | A |
| 3 | BICF2G630349422        | 76712664 | A | 0.75 | 0.5714 | G |
| 3 | BICF2G630349427        | 76718717 | A | 0.25 | 0.2857 | G |
| 3 | BICF2G630349435        | 76736276 | 0 | 0    | 0      | A |
| 3 | BICF2G630349439        | 76742406 | G | 0.25 | 0.2857 | C |
| 3 | BICF2G630349453        | 76754889 | G | 0.25 | 0.2143 | A |
| 3 | BICF2P1345210          | 76771428 | A | 0.5  | 0.3571 | C |
| 3 | BICF2G630349487        | 76775110 | A | 0.25 | 0.2857 | G |
| 3 | BICF2P799197           | 76779236 | A | 0    | 0      | G |
| 3 | BICF2G630349494        | 76780451 | A | 0.25 | 0.2857 | G |
| 3 | BICF2P1363352          | 76787207 | A | 0    | 0      | G |
| 3 | BICF2P767878           | 76815454 | A | 0.25 | 0.2857 | G |
| 3 | BICF2P1172332          | 76823135 | A | 0    | 0      | G |
| 3 | BICF2P1128420          | 76840426 | A | 0.75 | 0.7143 | C |
| 3 | BICF2P1351343          | 76853434 | G | 0    | 0      | A |
| 3 | BICF2P194303           | 76858933 | A | 0    | 0.1429 | G |
| 3 | BICF2S23726902         | 76866712 | A | 0.25 | 0.2143 | G |
| 3 | BICF2P1221611          | 76868039 | A | 0.75 | 0.6429 | G |
| 3 | BICF2P1010828          | 76873849 | A | 0    | 0.1429 | G |
| 3 | BICF2S23026850         | 76882343 | C | 0.25 | 0.4286 | A |
| 3 | BICF2P421182           | 76889015 | G | 0.75 | 0.5714 | A |
| 3 | TIGRP2P51989_rs8879126 | 76905021 | A | 0.25 | 0.2    | G |
| 3 | TIGRP2P51992_rs8717996 | 76915735 | G | 0.25 | 0.2143 | A |
| 3 | BICF2S23314011         | 76928912 | 0 | 0    | 0      | G |
| 3 | BICF2S22945795         | 76931700 | A | 0    | 0      | G |
| 3 | BICF2S22957553         | 76939044 | A | 0.5  | 0.3571 | G |
| 3 | BICF2P597143           | 76948680 | A | 0    | 0      | G |
| 3 | TIGRP2P52015_rs9000772 | 76965152 | A | 0    | 0      | C |
| 3 | BICF2P588803           | 76965621 | G | 0.5  | 0.3571 | A |
| 3 | BICF2P303600           | 76972709 | A | 0    | 0      | G |
| 3 | BICF2S2363772          | 76982570 | A | 0.5  | 0.5    | G |
| 3 | BICF2P447707           | 76993944 | A | 1    | 0.8571 | G |
| 3 | BICF2P581718           | 77008938 | G | 0.5  | 0.5    | A |
| 3 | TIGRP2P52037_rs8836449 | 77017567 | G | 0.5  | 0.5    | A |
| 3 | BICF2P480331           | 77027506 | G | 0.75 | 0.6429 | A |
| 3 | BICF2P1329771          | 77044070 | A | 0    | 0      | T |
| 3 | BICF2P1329770          | 77044398 | A | 0.5  | 0.6429 | G |
| 3 | TIGRP2P52054_rs8894580 | 77051936 | G | 0.5  | 0.3571 | A |
| 3 | BICF2P198634           | 77064729 | 0 | 0    | 0      | A |
| 3 | BICF2P935759           | 77082250 | G | 0    | 0      | A |
| 3 | TIGRP2P52083_rs8917637 | 77091309 | G | 0.25 | 0.4286 | A |
| 3 | BICF2S23436526         | 77100589 | A | 0.75 | 0.5714 | G |
| 3 | BICF2P211600           | 77114189 | G | 0.75 | 0.5714 | A |

|   |                        |          |   |      |        |   |
|---|------------------------|----------|---|------|--------|---|
| 3 | BICF2P370559           | 77123436 | G | 0.75 | 0.5714 | A |
| 3 | BICF2P1034830          | 77132463 | A | 0    | 0      | G |
| 3 | BICF2P461272           | 77145667 | G | 0    | 0      | A |
| 3 | BICF2P612776           | 77163507 | G | 0.25 | 0.2857 | A |
| 3 | TIGRP2P52123_rs8945903 | 77167296 | G | 0.25 | 0.2143 | A |
| 3 | BICF2P1458746          | 77186343 | 0 | 0    | 0      | G |
| 3 | BICF2P357425           | 77192506 | 0 | 0    | 0      | G |
| 3 | TIGRP2P52139_rs8921562 | 77199959 | G | 0    | 0      | A |
| 3 | BICF2S23629281         | 77211742 | A | 0    | 0      | G |
| 3 | TIGRP2P52152_rs8706382 | 77232016 | A | 0.5  | 0.3571 | G |
| 3 | TIGRP2P52164_rs9233667 | 77235984 | A | 0    | 0.1429 | C |
| 3 | BICF2S23120139         | 77246576 | C | 0    | 0.1429 | A |
| 3 | BICF2P899066           | 77259768 | A | 0    | 0.1429 | G |
| 3 | BICF2S23054595         | 77274253 | G | 0.5  | 0.6429 | A |
| 3 | BICF2P254094           | 77284846 | A | 0.25 | 0.4286 | G |
| 3 | BICF2P780826           | 77292153 | A | 0.25 | 0.3571 | G |
| 3 | BICF2P174582           | 77312759 | A | 0.5  | 0.3571 | G |
| 3 | TIGRP2P52204_rs8728111 | 77319808 | A | 0.75 | 0.6429 | G |
| 3 | TIGRP2P52208_rs8998680 | 77329699 | G | 0    | 0      | A |
| 3 | BICF2P1331463          | 77340454 | A | 0    | 0.1429 | G |
| 3 | BICF2P493602           | 77350118 | A | 0.5  | 0.5    | C |
| 3 | BICF2S23040234         | 77371515 | A | 0.25 | 0.2143 | G |
| 3 | BICF2S23042961         | 77375714 | A | 0.25 | 0.2143 | G |
| 3 | BICF2S22911397         | 77388107 | A | 0.75 | 0.6429 | G |
| 3 | BICF2G630349507        | 77398683 | A | 0.5  | 0.3571 | G |
| 3 | BICF2G630349514        | 77403017 | A | 1    | 1      | G |
| 3 | BICF2S23657288         | 77409440 | G | 0    | 0      | A |
| 3 | BICF2G630349570        | 77420427 | A | 0    | 0      | G |
| 3 | BICF2G630349577        | 77421906 | G | 0    | 0      | A |
| 3 | BICF2G630349582        | 77434496 | A | 0.5  | 0.3571 | C |
| 3 | BICF2P785980           | 77434528 | G | 0.25 | 0.2857 | A |
| 3 | BICF2G630349611        | 77450054 | A | 0.5  | 0.5    | G |
| 3 | BICF2P601460           | 77462040 | A | 0.75 | 0.7857 | G |
| 3 | BICF2G630349638        | 77473272 | C | 0    | 0      | G |
| 3 | BICF2G630349656        | 77484653 | G | 0    | 0      | A |
| 3 | BICF2P742001           | 77492832 | C | 0.5  | 0.5    | A |
| 3 | BICF2P832035           | 77495231 | G | 0    | 0      | A |
| 3 | BICF2P832034           | 77495352 | G | 0.25 | 0.2857 | A |
| 3 | TIGRP2P52228_rs8981579 | 77499353 | G | 0.75 | 0.7143 | A |
| 3 | BICF2P155225           | 77513136 | A | 0.25 | 0.2857 | C |
| 3 | BICF2P1297019          | 77523199 | G | 0.25 | 0.2857 | C |
| 3 | BICF2P468395           | 77535819 | A | 0    | 0.1429 | G |
| 3 | BICF2G630349680        | 77545893 | C | 0.5  | 0.5    | A |
| 3 | BICF2G630349685        | 77550729 | A | 0    | 0.1429 | G |
| 3 | BICF2G630349703        | 77559364 | A | 0    | 0.1429 | G |
| 3 | TIGRP2P52267_rs9018117 | 77572364 | A | 1    | 0.8571 | G |
| 3 | BICF2G630349736        | 77598589 | G | 0    | 0      | A |



|   |                        |          |   |      |        |   |
|---|------------------------|----------|---|------|--------|---|
| 3 | BICF2P98220            | 77602060 | C | 0    | 0      | A |
| 3 | BICF2G630349762        | 77617467 | G | 0    | 0      | A |
| 3 | BICF2G630349775        | 77625147 | A | 0    | 0      | G |
| 3 | BICF2G630349793        | 77638581 | A | 0    | 0      | G |
| 3 | BICF2S23912836         | 77650260 | 0 | 0    | 0      | A |
| 3 | BICF2S23037810         | 77662474 | A | 0.25 | 0.2143 | G |
| 3 | BICF2G630349802        | 77676446 | A | 0.75 | 0.5714 | C |
| 3 | TIGRP2P52286_rs8742992 | 77687076 | G | 0    | 0      | A |
| 3 | G260f57S271            | 77719513 | 0 | 0    | 0      | C |
| 3 | BICF2P1251492          | 77757407 | 0 | 0    | 0      | G |
| 3 | BICF2P203299           | 77777415 | A | 0.5  | 0.5    | G |
| 3 | BICF2P511457           | 77787903 | A | 0    | 0.1429 | G |
| 3 | BICF2P1371258          | 77799453 | 0 | 0    | 0      | A |
| 3 | BICF2P367290           | 77812046 | A | 0    | 0.1429 | G |
| 3 | BICF2S23743883         | 77839601 | A | 0    | 0      | G |
| 3 | BICF2G630349815        | 77845643 | G | 0    | 0      | A |
| 3 | TIGRP2P52300_rs8780585 | 77858838 | A | 0    | 0      | G |
| 3 | BICF2G630349827        | 77876070 | G | 0    | 0      | A |
| 3 | BICF2P701334           | 77882539 | G | 0    | 0      | A |
| 3 | BICF2G630349864        | 77902349 | G | 0    | 0      | A |
| 3 | TIGRP2P52322_rs9163918 | 77919316 | C | 0    | 0      | A |
| 3 | BICF2P804602           | 77934564 | A | 0    | 0      | C |
| 3 | BICF2G630349877        | 77954740 | A | 0    | 0      | G |
| 3 | BICF2G630349906        | 77969447 | C | 0    | 0      | A |
| 3 | BICF2G630349908        | 77970949 | C | 0    | 0      | A |
| 3 | BICF2G630349937        | 77987698 | G | 0    | 0      | A |
| 3 | BICF2G630349943        | 77995876 | G | 0    | 0      | A |
| 3 | BICF2G630349947        | 78006496 | A | 0    | 0      | G |
| 3 | BICF2P438218           | 78019204 | G | 0    | 0      | A |
| 3 | TIGRP2P52342_rs8868715 | 78044628 | 0 | 0    | 0      | A |
| 3 | TIGRP2P52344_rs9147391 | 78053304 | C | 0    | 0.1429 | A |
| 3 | BICF2P928261           | 78069320 | G | 0    | 0.1429 | A |
| 3 | BICF2P1015040          | 78083966 | 0 | 0    | 0      | A |
| 3 | BICF2G630349985        | 78102542 | 0 | 0    | 0      | G |
| 3 | BICF2S23764213         | 78121971 | C | 0    | 0      | G |
| 3 | BICF2P136769           | 78142294 | 0 | 0    | 0      | G |
| 3 | BICF2S23111583         | 78153961 | A | 1    | 1      | G |
| 3 | BICF2P19789            | 78156052 | 0 | 0    | 0      | A |
| 3 | BICF2G630350010        | 78170662 | A | 0.25 | 0.3571 | G |
| 3 | BICF2G630350031        | 78180593 | A | 0    | 0      | G |
| 3 | TIGRP2P52378_rs8550921 | 78190148 | 0 | 0    | 0      | A |
| 3 | TIGRP2P52392_rs9010331 | 78203243 | T | 0    | 0      | A |
| 3 | BICF2P1079711          | 78213482 | G | 0.25 | 0.2857 | A |
| 3 | BICF2P731342           | 78228787 | 0 | 0    | 0      | A |
| 3 | BICF2G630350055        | 78245370 | C | 0    | 0      | A |
| 3 | BICF2G630350056        | 78246123 | G | 0    | 0      | A |
| 3 | BICF2G630350091        | 78268086 | A | 0    | 0      | G |

|   |                        |          |   |      |        |   |
|---|------------------------|----------|---|------|--------|---|
| 3 | BICF2G630350096        | 78270333 | A | 0    | 0      | G |
| 3 | BICF2G630350122        | 78283283 | G | 0.25 | 0.25   | A |
| 3 | BICF2G630350140        | 78294250 | 0 | 0    | 0      | G |
| 3 | BICF2G630350157        | 78306101 | G | 0.75 | 0.6429 | A |
| 3 | BICF2G630350178        | 78318394 | A | 0.5  | 0.3571 | G |
| 3 | BICF2G630350205        | 78337812 | A | 0    | 0      | G |
| 3 | BICF2G630350208        | 78338645 | 0 | 0    | 0      | G |
| 3 | TIGRP2P52407_rs8676594 | 78349582 | A | 0    | 0      | G |
| 3 | BICF2P467023           | 78365777 | G | 0.25 | 0.2857 | A |
| 3 | BICF2G630350266        | 78375599 | C | 0.25 | 0.2143 | A |
| 3 | BICF2G630350278        | 78390514 | G | 0    | 0.1429 | A |
| 3 | BICF2P938917           | 78401594 | G | 0.25 | 0.2857 | A |
| 3 | BICF2S23613021         | 78410733 | A | 0    | 0      | G |
| 3 | BICF2P981921           | 78428265 | 0 | 0    | 0      | A |
| 3 | BICF2P1394511          | 78451311 | G | 0    | 0      | A |
| 3 | TIGRP2P52418_rs9005402 | 78458918 | G | 0    | 0      | A |
| 3 | BICF2P826538           | 78465543 | A | 0.25 | 0.2143 | G |
| 3 | BICF2G630350280        | 78481536 | 0 | 0    | 0      | A |
| 3 | TIGRP2P52420_rs8817908 | 78487527 | A | 0.5  | 0.3571 | C |
| 3 | BICF2S23053881         | 78507473 | C | 0.5  | 0.5    | A |
| 3 | BICF2G630350314        | 78514818 | A | 0    | 0      | G |
| 3 | TIGRP2P52432_rs8898465 | 78523773 | A | 0.25 | 0.4286 | G |
| 3 | BICF2G630350331        | 78533723 | G | 0    | 0      | A |
| 3 | BICF2G630350342        | 78547465 | A | 0.25 | 0.4167 | G |
| 3 | BICF2P220016           | 78565160 | A | 0    | 0      | G |
| 3 | BICF2G630350370        | 78568398 | G | 0.25 | 0.4286 | A |
| 3 | BICF2P817449           | 78585526 | A | 0    | 0.4286 | C |
| 3 | BICF2P88103            | 78597075 | G | 0.25 | 0.4286 | A |
| 3 | BICF2P285254           | 78611845 | A | 0    | 0.4167 | G |
| 3 | BICF2G630350421        | 78619209 | A | 0    | 0      | G |
| 3 | BICF2G630350444        | 78636039 | G | 1    | 0.8571 | A |
| 3 | BICF2G630350447        | 78637087 | A | 0    | 0.1429 | G |
| 3 | BICF2G630350457        | 78649779 | A | 0    | 0.1429 | G |
| 3 | BICF2G630350469        | 78661044 | G | 0.25 | 0.3571 | A |
| 3 | TIGRP2P52457_rs8886612 | 78674756 | A | 0.75 | 0.6429 | G |
| 3 | TIGRP2P52467_rs8761491 | 78694396 | 0 | 0    | 0      | A |
| 3 | BICF2P515586           | 78707952 | A | 0    | 0.1429 | G |
| 3 | BICF2P271022           | 78720491 | A | 0    | 0.1429 | C |
| 3 | BICF2G630350484        | 78731522 | C | 0    | 0.1429 | G |
| 3 | BICF2G630350495        | 78744858 | C | 0    | 0      | A |
| 3 | TIGRP2P52493_rs8933866 | 78754516 | G | 0.5  | 0.5    | A |
| 3 | BICF2P867441           | 78766026 | A | 0    | 0      | G |
| 3 | BICF2G630350530        | 78775036 | G | 0    | 0.1429 | A |
| 3 | BICF2P1047609          | 78794982 | A | 0.25 | 0.4286 | G |
| 3 | BICF2P176587           | 78808483 | T | 0.5  | 0.6429 | A |
| 3 | BICF2P31893            | 78810511 | A | 0.25 | 0.4286 | G |
| 3 | TIGRP2P52529_rs9110366 | 78823092 | A | 0.25 | 0.4286 | C |

|   |                        |          |   |      |        |   |
|---|------------------------|----------|---|------|--------|---|
| 3 | BICF2P1235979          | 78836678 | A | 0.5  | 0.6429 | G |
| 3 | BICF2G630350549        | 78849091 | G | 0.5  | 0.6429 | A |
| 3 | BICF2G630350568        | 78858764 | G | 0.5  | 0.6429 | A |
| 3 | BICF2G630350585        | 78871088 | G | 0.5  | 0.6429 | A |
| 3 | BICF2G630350598        | 78882371 | A | 0.5  | 0.6429 | G |
| 3 | BICF2S23723021         | 78890598 | A | 0.25 | 0.4286 | G |
| 3 | BICF2G630350625        | 78905878 | G | 0.25 | 0.4286 | A |
| 3 | TIGRP2P52562_rs8912466 | 78913355 | A | 0.5  | 0.6429 | G |
| 3 | BICF2G630350655        | 78925104 | A | 0.25 | 0.2143 | C |
| 3 | BICF2G630350673        | 78938267 | A | 0.75 | 0.5714 | G |
| 3 | BICF2P158944           | 78984961 | A | 0.5  | 0.3571 | G |
| 3 | BICF2G630350680        | 79008271 | A | 0    | 0      | G |
| 3 | BICF2S235788           | 79032165 | A | 0    | 0      | G |
| 3 | BICF2G630350733        | 79057111 | A | 0.75 | 0.5714 | G |
| 3 | BICF2G630350750        | 79066740 | A | 0    | 0.1429 | G |
| 3 | BICF2P350476           | 79084338 | A | 0    | 0.1429 | T |
| 3 | BICF2G630350797        | 79096289 | G | 0.25 | 0.2857 | A |
| 3 | BICF2G630350798        | 79098334 | G | 0.25 | 0.2857 | A |
| 3 | BICF2G630350817        | 79110313 | C | 0    | 0      | A |
| 3 | BICF2G630350829        | 79134016 | G | 0    | 0      | A |
| 3 | BICF2G630350854        | 79148088 | G | 0.75 | 0.6429 | A |
| 3 | BICF2S22923022         | 79158126 | 0 | 0    | 0      | G |
| 3 | BICF2G630350875        | 79166004 | G | 0    | 0.1429 | A |
| 3 | BICF2G630350909        | 79180723 | A | 0    | 0.1429 | G |
| 3 | BICF2G630350926        | 79189529 | G | 0.25 | 0.2143 | A |
| 3 | TIGRP2P52627_rs8594309 | 79208003 | A | 0    | 0      | G |
| 3 | BICF2P910940           | 79213365 | A | 0.25 | 0.4167 | G |
| 3 | BICF2G630350937        | 79229821 | A | 0    | 0      | G |
| 3 | BICF2G630350951        | 79237982 | G | 1    | 0.8571 | A |
| 3 | BICF2G630350988        | 79250592 | G | 0    | 0      | A |
| 3 | BICF2G630351019        | 79264559 | A | 0    | 0      | G |
| 3 | BICF2G630351037        | 79279744 | G | 0    | 0      | A |
| 3 | BICF2G630351044        | 79282793 | G | 0.75 | 0.6429 | A |
| 3 | BICF2G630351048        | 79283989 | G | 0.75 | 0.6429 | A |
| 3 | BICF2G630351066        | 79302715 | A | 0    | 0      | G |
| 3 | BICF2P1318782          | 79305920 | G | 0.75 | 0.6429 | A |
| 3 | BICF2P636424           | 79306893 | G | 0.75 | 0.6429 | A |
| 3 | BICF2P1209669          | 79317191 | G | 0.25 | 0.3571 | A |
| 3 | BICF2G630351083        | 79328247 | G | 0.25 | 0.3571 | A |
| 3 | BICF2G630351085        | 79347494 | A | 0    | 0      | T |
| 3 | BICF2P738381           | 79353205 | G | 0    | 0      | A |
| 3 | BICF2G630351108        | 79366709 | G | 0    | 0      | A |
| 3 | BICF2G630351132        | 79376145 | A | 0    | 0      | G |
| 3 | BICF2G630351160        | 79387950 | G | 0    | 0      | A |
| 3 | BICF2G630351179        | 79397412 | A | 0.25 | 0.2143 | C |
| 3 | BICF2G630351193        | 79413315 | G | 0.25 | 0.2143 | A |
| 3 | BICF2S23519935         | 79419697 | G | 0    | 0      | A |

|   |                        |          |   |      |        |   |
|---|------------------------|----------|---|------|--------|---|
| 3 | BICF2G630351236        | 79434470 | A | 0    | 0      | C |
| 3 | BICF2G630351247        | 79445813 | G | 0    | 0      | A |
| 3 | BICF2G630351248        | 79445904 | A | 0    | 0      | T |
| 3 | BICF2G630351268        | 79453670 | G | 0    | 0      | A |
| 3 | BICF2G630351281        | 79471478 | G | 0    | 0      | A |
| 3 | BICF2G630351287        | 79477511 | G | 0    | 0      | A |
| 3 | BICF2G630351304        | 79488468 | A | 0    | 0      | C |
| 3 | BICF2G630351314        | 79500669 | A | 0    | 0      | T |
| 3 | BICF2G630351326        | 79513219 | C | 0    | 0      | A |
| 3 | BICF2G630351334        | 79523561 | A | 0.5  | 0.3571 | G |
| 3 | BICF2G630351361        | 79547129 | A | 0.5  | 0.3571 | G |
| 3 | BICF2P619667           | 79557135 | 0 | 0    | 0      | T |
| 3 | BICF2P655413           | 79570235 | A | 0    | 0      | G |
| 3 | BICF2G630351386        | 79581043 | A | 1    | 0.5833 | C |
| 3 | BICF2G630351415        | 79595089 | C | 0    | 0      | A |
| 3 | BICF2G630351438        | 79611303 | A | 1    | 0.8571 | G |
| 3 | BICF2G630351455        | 79628868 | A | 0.75 | 0.5714 | G |
| 3 | BICF2G630351466        | 79643568 | A | 1    | 0.9167 | C |
| 3 | BICF2P1375355          | 79653276 | A | 1    | 0.8571 | C |
| 3 | BICF2G630351527        | 79670918 | A | 0    | 0      | G |
| 3 | BICF2G630351530        | 79672651 | C | 1    | 0.8571 | A |
| 3 | BICF2S22929895         | 79689102 | A | 0.25 | 0.4286 | G |
| 3 | BICF2S23127335         | 79702898 | G | 0.75 | 0.7857 | A |
| 3 | BICF2S2311919          | 79712939 | G | 0    | 0.1429 | A |
| 3 | BICF2P356174           | 79722257 | C | 1    | 1      | A |
| 3 | BICF2G630351548        | 79742288 | G | 0    | 0      | A |
| 3 | BICF2G630351560        | 79753070 | G | 0    | 0.1429 | A |
| 3 | BICF2P336665           | 79766411 | A | 0    | 0.1429 | G |
| 3 | BICF2S2377445          | 79785881 | A | 0    | 0      | G |
| 3 | BICF2G630351596        | 79794503 | A | 0.75 | 0.7143 | G |
| 3 | BICF2G630351615        | 79806468 | G | 0    | 0      | C |
| 3 | BICF2G630351638        | 79828801 | A | 0    | 0.1429 | G |
| 3 | BICF2P985366           | 79838408 | G | 0.5  | 0.3571 | A |
| 3 | BICF2G630351670        | 79854953 | A | 0    | 0      | G |
| 3 | TIGRP2P52740_rs8736588 | 79860774 | A | 0    | 0      | G |
| 3 | BICF2G630351682        | 79867991 | G | 1    | 1      | A |
| 3 | BICF2S23335038         | 79887712 | A | 0.5  | 0.3571 | G |
| 3 | BICF2S2396612          | 79897238 | G | 0    | 0      | A |
| 3 | TIGRP2P52745_rs8756117 | 79910793 | 0 | 0    | 0      | A |
| 3 | BICF2P914922           | 79920914 | G | 0.5  | 0.3571 | A |
| 3 | BICF2P819052           | 79934161 | G | 0    | 0      | A |
| 3 | BICF2P819051           | 79934358 | G | 0    | 0      | A |
| 3 | BICF2S22963906         | 79945520 | A | 0    | 0      | T |
| 3 | BICF2P1232976          | 79954709 | G | 0.75 | 0.7143 | A |
| 3 | BICF2G630351698        | 79962138 | A | 0    | 0      | G |
| 3 | BICF2G630351712        | 79964546 | C | 0.25 | 0.2143 | G |
| 3 | BICF2G630351727        | 79977654 | C | 0    | 0      | A |

|   |                        |          |   |      |        |   |
|---|------------------------|----------|---|------|--------|---|
| 3 | BICF2G630351734        | 79984511 | G | 0.25 | 0.2143 | A |
| 3 | BICF2G630351748        | 79996299 | A | 0    | 0      | G |
| 3 | TIGRP2P52773_rs8951371 | 80015718 | G | 0.75 | 0.6429 | A |
| 3 | BICF2G630351779        | 80027023 | A | 0    | 0.1429 | T |
| 3 | BICF2S2367381          | 80035245 | 0 | 0    | 0      | A |
| 3 | BICF2S23040483         | 80047451 | A | 0    | 0      | G |
| 3 | BICF2G630351787        | 80054839 | 0 | 0    | 0      | C |
| 3 | TIGRP2P52803_rs9198335 | 80070562 | A | 0.25 | 0.2143 | G |
| 3 | BICF2P718663           | 80082492 | C | 0.25 | 0.4286 | A |
| 3 | BICF2P414826           | 80086095 | C | 0.25 | 0.4286 | A |
| 3 | TIGRP2P52822_rs9003030 | 80105817 | A | 0    | 0      | G |
| 3 | BICF2G630351801        | 80114990 | G | 0.5  | 0.6429 | A |
| 3 | BICF2P330097           | 80128364 | 0 | 0    | 0      | A |
| 3 | BICF2G630351828        | 80140623 | C | 0    | 0      | A |
| 3 | BICF2G630351846        | 80152528 | G | 0.5  | 0.3571 | A |
| 3 | BICF2G630351852        | 80156101 | G | 0    | 0      | A |
| 3 | BICF2P606587           | 80164745 | A | 0    | 0      | G |
| 3 | BICF2G630351861        | 80166712 | A | 0.5  | 0.3571 | G |
| 3 | BICF2G630351882        | 80178241 | A | 0.25 | 0.2857 | G |
| 3 | BICF2S23060697         | 80189746 | C | 0    | 0      | G |
| 3 | BICF2S23758115         | 80203644 | A | 0    | 0      | G |
| 3 | BICF2G630351916        | 80214528 | G | 0.25 | 0.2857 | A |
| 3 | BICF2G630351931        | 80228000 | A | 0    | 0.2857 | G |
| 3 | BICF2G630351936        | 80235939 | A | 0.25 | 0.25   | G |
| 3 | TIGRP2P52854_rs8971349 | 80248522 | C | 0    | 0.1429 | A |
| 3 | BICF2G630351961        | 80265404 | G | 0.25 | 0.4286 | A |
| 3 | BICF2G630351969        | 80270038 | 0 | 0    | 0      | G |
| 3 | BICF2G630351991        | 80287340 | G | 1    | 0.8571 | A |
| 3 | BICF2G630352002        | 80302832 | G | 0.75 | 0.6429 | A |
| 3 | BICF2G630352027        | 80311390 | G | 0    | 0      | C |
| 3 | BICF2G630352039        | 80321200 | G | 0    | 0      | A |
| 3 | BICF2G630352059        | 80329880 | G | 0    | 0      | A |
| 3 | TIGRP2P52881_rs8913452 | 80343076 | C | 0    | 0.1429 | A |
| 3 | BICF2G630352088        | 80345225 | A | 0    | 0      | G |
| 3 | BICF2G630352098        | 80353173 | G | 0.25 | 0.3571 | A |
| 3 | BICF2G630352123        | 80364443 | G | 0    | 0.1429 | A |
| 3 | BICF2G630352144        | 80374146 | A | 0.75 | 0.7857 | G |
| 3 | BICF2G630352171        | 80386420 | G | 0    | 0      | A |
| 3 | BICF2P338286           | 80396664 | G | 0    | 0      | A |
| 3 | TIGRP2P52906_rs8752263 | 80418801 | A | 0    | 0      | G |
| 3 | BICF2G630352218        | 80423419 | A | 0    | 0      | G |
| 3 | BICF2G630352228        | 80431713 | G | 0.25 | 0.2857 | A |
| 3 | BICF2P286852           | 80443429 | C | 0    | 0      | A |
| 3 | BICF2G630352257        | 80464707 | A | 0.25 | 0      | C |
| 3 | BICF2G630352263        | 80467514 | G | 0.25 | 0.2857 | A |
| 3 | BICF2G630352285        | 80477329 | A | 0    | 0      | G |
| 3 | TIGRP2P52947_rs8934715 | 80493595 | A | 0    | 0      | G |

|   |                        |          |   |      |        |   |
|---|------------------------|----------|---|------|--------|---|
| 3 | BICF2G630352302        | 80505564 | G | 0.75 | 0.6429 | A |
| 3 | BICF2G630352322        | 80520903 | A | 0    | 0      | G |
| 3 | BICF2S2444900          | 80528686 | G | 0.25 | 0.3571 | A |
| 3 | BICF2G630352353        | 80548984 | A | 0.75 | 0.7143 | G |
| 3 | BICF2G630352358        | 80563660 | G | 0.75 | 0.7143 | A |
| 3 | BICF2G630352374        | 80576248 | A | 0    | 0      | G |
| 3 | BICF2G630352375        | 80576378 | G | 0.75 | 0.7143 | A |
| 3 | BICF2P1027365          | 80582847 | A | 0.25 | 0.3333 | G |
| 3 | BICF2G630352395        | 80597432 | A | 0    | 0      | G |
| 3 | BICF2P820596           | 80604924 | A | 0    | 0      | G |
| 3 | BICF2G630352412        | 80619443 | A | 0    | 0      | G |
| 3 | BICF2P398015           | 80626708 | G | 0.5  | 0.3571 | C |
| 3 | BICF2G630352430        | 80638623 | A | 0    | 0      | C |
| 3 | BICF2P378883           | 80649840 | A | 0.5  | 0.6429 | C |
| 3 | BICF2G630352476        | 80661364 | C | 0.75 | 0.6429 | A |
| 3 | BICF2P1130015          | 80675511 | C | 0    | 0      | G |
| 3 | BICF2P1307987          | 80684065 | A | 0.25 | 0.2857 | G |
| 3 | BICF2G630352488        | 80701051 | G | 0.5  | 0.6429 | A |
| 3 | BICF2G630352516        | 80707135 | G | 0.25 | 0.2857 | A |
| 3 | BICF2G630352537        | 80718567 | A | 0.75 | 0.7143 | G |
| 3 | BICF2S23019521         | 80735258 | A | 0.5  | 0.3571 | C |
| 3 | TIGRP2P53013_rs9161504 | 80746593 | 0 | 0    | 0      | A |
| 3 | BICF2G630352541        | 80759499 | C | 0.5  | 0.3571 | A |
| 3 | BICF2G630352562        | 80768212 | G | 0    | 0      | A |
| 3 | BICF2G630352570        | 80779965 | T | 0    | 0      | A |
| 3 | BICF2G630352589        | 80790798 | A | 0.5  | 0.6429 | C |
| 3 | BICF2G630352603        | 80801257 | G | 0    | 0      | A |
| 3 | BICF2S23646130         | 80815435 | A | 0    | 0      | G |
| 3 | BICF2G630352623        | 80826994 | A | 0.5  | 0.6667 | G |
| 3 | BICF2G630352631        | 80834869 | A | 1    | 0.8    | C |
| 3 | BICF2G630352636        | 80859355 | A | 0.5  | 0.3571 | G |
| 3 | BICF2G630352655        | 80868905 | A | 0.5  | 0.5    | G |
| 3 | BICF2G630352670        | 80880200 | A | 0    | 0      | G |
| 3 | BICF2S23431583         | 80901087 | G | 0.75 | 0.7857 | A |
| 3 | BICF2S23447659         | 80904651 | G | 0.25 | 0.2857 | A |
| 3 | BICF2S23647860         | 80915084 | A | 0.5  | 0.5    | C |
| 3 | BICF2G630352679        | 80934759 | A | 0.5  | 0.5    | G |
| 3 | BICF2G630352683        | 80937583 | G | 0.75 | 0.7857 | A |
| 3 | BICF2G630352700        | 80949037 | A | 0    | 0      | G |
| 3 | BICF2G630352723        | 80962990 | G | 0.75 | 0.7857 | A |
| 3 | BICF2P596527           | 80978069 | G | 1    | 0.8571 | A |
| 3 | BICF2G630352736        | 80989827 | A | 0    | 0.1429 | G |
| 3 | BICF2G630352743        | 80997714 | A | 0    | 0.1429 | G |
| 3 | BICF2G630352753        | 81011766 | A | 0.5  | 0.5    | T |
| 3 | BICF2G630352772        | 81022130 | G | 0.25 | 0.2857 | A |
| 3 | BICF2S2299618          | 81034529 | G | 0.75 | 0.5714 | A |
| 3 | BICF2G630352830        | 81043795 | G | 0.75 | 0.6429 | A |

|   |                        |          |   |      |        |   |
|---|------------------------|----------|---|------|--------|---|
| 3 | BICF2G630352847        | 81054600 | A | 0.25 | 0.3571 | G |
| 3 | BICF2G630352898        | 81078376 | A | 0    | 0      | C |
| 3 | BICF2P535731           | 81088665 | G | 0.75 | 0.6429 | A |
| 3 | TIGRP2P53083_rs8731448 | 81098611 | A | 0    | 0      | G |
| 3 | BICF2S23331003         | 81111559 | A | 0.25 | 0.2857 | G |
| 3 | BICF2G630352919        | 81122789 | A | 0.5  | 0.6429 | G |
| 3 | BICF2P720809           | 81141706 | G | 0.75 | 0.7143 | A |
| 3 | BICF2G630352940        | 81144023 | G | 0.75 | 0.7143 | A |
| 3 | BICF2P918968           | 81158706 | A | 0.5  | 0.5    | C |
| 3 | BICF2P1419798          | 81168419 | G | 0    | 0      | A |
| 3 | BICF2S23713111         | 81180675 | A | 0.25 | 0.3571 | G |
| 3 | BICF2G630352964        | 81197048 | G | 0.5  | 0.6667 | A |
| 3 | BICF2G630352972        | 81204994 | G | 0    | 0      | A |
| 3 | BICF2G630352992        | 81217941 | A | 0    | 0      | G |
| 3 | BICF2G630353014        | 81226612 | A | 0.5  | 0.5    | C |
| 3 | BICF2G630353026        | 81236278 | A | 0.5  | 0.5    | G |
| 3 | BICF2G630353072        | 81251679 | G | 0.5  | 0.5    | A |
| 3 | BICF2G630353085        | 81260069 | A | 0.5  | 0.5    | C |
| 3 | BICF2S23356466         | 81272685 | G | 0    | 0      | A |
| 3 | BICF2P203547           | 81283151 | A | 0.5  | 0.5    | G |
| 3 | BICF2P1377301          | 81295319 | G | 0    | 0      | A |
| 3 | TIGRP2P53115_rs9188435 | 81307080 | 0 | 0    | 0      | G |
| 3 | BICF2G630353110        | 81321706 | A | 0.5  | 0.6429 | G |
| 3 | BICF2G630353115        | 81332061 | A | 0.25 | 0.3571 | G |
| 3 | BICF2P744392           | 81349164 | G | 0    | 0      | A |
| 3 | BICF2G630353124        | 81352688 | G | 0.5  | 0.5    | A |
| 3 | BICF2G630353159        | 81368575 | A | 0    | 0.1429 | G |
| 3 | BICF2G630353164        | 81374898 | C | 0    | 0      | A |
| 3 | BICF2G630353188        | 81392541 | C | 0.25 | 0.2857 | A |
| 3 | BICF2G630353199        | 81397454 | G | 0    | 0.1429 | A |
| 3 | BICF2P492879           | 81409974 | A | 0    | 0      | G |
| 3 | BICF2P1396993          | 81426723 | G | 0.25 | 0.3571 | A |
| 3 | BICF2S23541639         | 81442657 | A | 0.25 | 0.2857 | C |
| 3 | BICF2G630353235        | 81446119 | A | 0    | 0      | C |
| 3 | BICF2G630353261        | 81457673 | C | 0    | 0.1429 | A |
| 3 | BICF2G630353280        | 81470961 | A | 0    | 0.1429 | G |
| 3 | BICF2G630353298        | 81481760 | A | 0    | 0.1429 | G |
| 3 | BICF2G630353318        | 81494304 | A | 0    | 0.1429 | G |
| 3 | BICF2G630353329        | 81505801 | A | 0.25 | 0.25   | G |
| 3 | BICF2G630353343        | 81513678 | G | 0.25 | 0.3571 | A |
| 3 | BICF2G630353361        | 81526188 | G | 0.25 | 0.2857 | A |
| 3 | BICF2G630353380        | 81547005 | G | 0.25 | 0.3571 | A |
| 3 | BICF2G630353404        | 81562205 | G | 0.5  | 0.5    | C |
| 3 | TIGRP2P53119_rs8582261 | 81570129 | A | 0    | 0.1429 | G |
| 3 | BICF2G630353408        | 81570257 | C | 0    | 0.1429 | G |
| 3 | BICF2P968238           | 81581529 | A | 0    | 0      | T |
| 3 | BICF2G630353451        | 81593625 | A | 0.75 | 0.6429 | G |

|   |                        |          |   |      |        |   |
|---|------------------------|----------|---|------|--------|---|
| 3 | BICF2P1268518          | 81608905 | G | 0    | 0      | A |
| 3 | BICF2S2305298          | 81622482 | G | 0.25 | 0.2143 | A |
| 3 | BICF2P323806           | 81629679 | A | 0    | 0.1429 | G |
| 3 | BICF2P147859           | 81649558 | C | 0    | 0.1429 | A |
| 3 | BICF2P887071           | 81656307 | C | 0.25 | 0.3571 | G |
| 3 | BICF2P176337           | 81670800 | A | 0    | 0.1429 | G |
| 3 | TIGRP2P53164_rs9084471 | 81677134 | A | 0.5  | 0.3571 | G |
| 3 | BICF2P188465           | 81684553 | A | 0.25 | 0.25   | C |
| 3 | BICF2P330098           | 81696737 | A | 0.5  | 0.3571 | G |
| 3 | BICF2S23656996         | 81718821 | A | 0.5  | 0.3571 | G |
| 3 | BICF2P357872           | 81719430 | A | 0.5  | 0.3571 | G |
| 3 | TIGRP2P53179_rs8876441 | 81731529 | A | 0.25 | 0.3333 | G |
| 3 | BICF2S23339371         | 81747509 | G | 0.5  | 0.3571 | A |
| 3 | BICF2P308830           | 81759916 | G | 0.25 | 0.2857 | A |
| 3 | BICF2P534725           | 81766348 | A | 0    | 0.2857 | T |
| 3 | TIGRP2P53204_rs8953266 | 81782018 | G | 0.25 | 0.3571 | A |
| 3 | BICF2G630353474        | 81783730 | A | 0.25 | 0.25   | G |
| 3 | BICF2S23338036         | 81794955 | A | 0.5  | 0.3    | G |
| 3 | BICF2G630353489        | 81809378 | G | 1    | 1      | A |
| 3 | BICF2P327754           | 81831663 | A | 0.5  | 0.5    | C |
| 3 | BICF2S23752543         | 81835300 | G | 0.5  | 0.5    | A |
| 3 | BICF2G630353565        | 81854536 | 0 | 0    | 0      | A |
| 3 | BICF2G630353572        | 81859673 | A | 0.75 | 0.7857 | G |
| 3 | BICF2G630353589        | 81869511 | A | 0.75 | 0.7857 | G |
| 3 | BICF2P619275           | 81873170 | G | 0.25 | 0.4286 | A |
| 3 | BICF2G630353629        | 81883092 | A | 0.5  | 0.6429 | G |
| 3 | BICF2P498905           | 81894488 | G | 0.25 | 0.4286 | A |
| 3 | BICF2P872459           | 81912681 | G | 0    | 0      | A |
| 3 | BICF2G630353682        | 81923682 | G | 0.25 | 0.1667 | A |
| 3 | BICF2G630353692        | 81936089 | C | 0.25 | 0.2143 | A |
| 3 | TIGRP2P53247_rs9011208 | 81943014 | A | 0.25 | 0.25   | G |
| 3 | BICF2P384316           | 81953535 | G | 0.5  | 0.6429 | A |
| 3 | BICF2G630353710        | 81963285 | G | 0.5  | 0.6429 | A |
| 3 | BICF2G630353736        | 81983499 | T | 1    | 1      | A |
| 3 | BICF2G630353762        | 81992067 | G | 0.75 | 0.75   | A |
| 3 | BICF2G630353776        | 82006134 | G | 0.5  | 0.5    | A |
| 3 | BICF2P908017           | 82010803 | A | 0    | 0      | G |
| 3 | BICF2G630353795        | 82020214 | A | 0.5  | 0.5    | G |
| 3 | BICF2S23429490         | 82034758 | A | 0    | 0      | C |
| 3 | BICF2G630353804        | 82041467 | 0 | 0    | 0      | G |
| 3 | BICF2G630353823        | 82059075 | A | 0.75 | 0.7857 | G |
| 3 | BICF2G630353829        | 82066003 | A | 0.5  | 0.3571 | G |
| 3 | BICF2G630353842        | 82075688 | A | 0.5  | 0.5    | G |
| 3 | BICF2P125810           | 82094802 | A | 0    | 0.4167 | G |
| 3 | BICF2P1332991          | 82117525 | C | 0    | 0      | A |
| 3 | BICF2P683381           | 82122204 | G | 0    | 0.1429 | A |
| 3 | BICF2P1097877          | 82133864 | G | 0    | 0      | A |



|   |                        |          |   |      |        |   |
|---|------------------------|----------|---|------|--------|---|
| 3 | BICF2P885972           | 82143098 | A | 0    | 0      | G |
| 3 | BICF2P1342564          | 82148878 | G | 0.5  | 0.5    | A |
| 3 | BICF2P980426           | 82164001 | 0 | 0    | 0      | G |
| 3 | TIGRP2P53292_rs8747144 | 82171660 | 0 | 0    | 0      | T |
| 3 | BICF2P774372           | 82187294 | G | 0    | 0.1429 | A |
| 3 | BICF2P315087           | 82192325 | G | 1    | 1      | A |
| 3 | BICF2P450388           | 82204122 | G | 1    | 1      | A |
| 3 | BICF2P349336           | 82214620 | A | 0.75 | 0.7143 | G |
| 3 | BICF2P274497           | 82225893 | A | 1    | 0.75   | G |
| 3 | BICF2P1144541          | 82240338 | G | 0.25 | 0.2143 | A |
| 3 | TIGRP2P53312_rs8723956 | 82249450 | A | 0    | 0      | G |
| 3 | BICF2P1116169          | 82261144 | A | 0    | 0      | G |
| 3 | BICF2P518314           | 82275318 | A | 0    | 0      | G |
| 3 | BICF2S23645482         | 82294464 | G | 1    | 0.8571 | A |
| 3 | BICF2P1105366          | 82314805 | A | 0.5  | 0.5    | G |
| 3 | BICF2S23719887         | 82317800 | A | 0.5  | 0.3571 | G |
| 3 | BICF2P1156194          | 82333403 | G | 0.5  | 0.3571 | A |
| 3 | BICF2P1125677          | 82342011 | G | 0.5  | 0.3571 | A |
| 3 | BICF2P1011005          | 82362238 | A | 0.5  | 0.6429 | C |
| 3 | TIGRP2P53355_rs8579202 | 82368181 | A | 0.5  | 0.6429 | G |
| 3 | TIGRP2P53357_rs9187653 | 82374867 | A | 0.25 | 0.2143 | G |
| 3 | BICF2S23210287         | 82388755 | G | 0.5  | 0.6429 | C |
| 3 | BICF2P211876           | 82392735 | A | 0.5  | 0.6429 | G |
| 3 | BICF2P351423           | 82407649 | A | 0.5  | 0.5    | G |
| 3 | BICF2S23720670         | 82415331 | A | 0    | 0.4167 | C |
| 3 | BICF2S23543305         | 82441139 | A | 0.75 | 0.6429 | C |
| 3 | BICF2S22954619         | 82466086 | G | 0.25 | 0.2143 | A |
| 3 | TIGRP2P53391_rs8707920 | 82476362 | G | 0    | 0.1429 | A |
| 3 | TIGRP2P53394_rs9146936 | 82478172 | A | 0.25 | 0.3571 | G |
| 3 | TIGRP2P53410_rs9155465 | 82497821 | G | 0    | 0.1429 | A |
| 3 | BICF2P807595           | 82508242 | C | 0    | 0.1429 | A |
| 3 | BICF2P525932           | 82520023 | A | 1    | 1      | T |
| 3 | BICF2S23726110         | 82527438 | T | 0.5  | 0.5    | A |
| 3 | BICF2S23737781         | 82541720 | C | 0    | 0      | A |
| 3 | BICF2P347939           | 82551354 | G | 0.5  | 0.5    | A |
| 3 | BICF2P1271500          | 82562206 | G | 0.5  | 0.6429 | A |
| 3 | BICF2P485843           | 82573784 | G | 0.5  | 0.5    | A |
| 3 | BICF2P998082           | 82583186 | G | 0    | 0      | A |
| 3 | BICF2P1096140          | 82597380 | G | 1    | 0.8571 | A |
| 3 | TIGRP2P53476_rs8736981 | 82606973 | 0 | 0    | 0      | C |
| 3 | TIGRP2P53477_rs8992924 | 82627358 | A | 1    | 0.8571 | G |
| 3 | BICF2P828798           | 82630385 | G | 0.75 | 0.6429 | A |
| 3 | BICF2P1320078          | 82650187 | G | 0.75 | 0.6429 | C |
| 3 | TIGRP2P53487_rs8847032 | 82654564 | G | 0    | 0      | A |
| 3 | TIGRP2P53514_rs8977688 | 82669887 | G | 1    | 1      | A |
| 3 | BICF2S23127058         | 82684665 | A | 0    | 0.1429 | G |
| 3 | BICF2S23351425         | 82693577 | A | 0    | 0.1429 | G |

|   |                        |          |   |      |        |   |
|---|------------------------|----------|---|------|--------|---|
| 3 | BICF2P905769           | 82704209 | 0 | 0    | 0      | G |
| 3 | BICF2P25756            | 82708959 | C | 1    | 1      | A |
| 3 | BICF2P573494           | 82726483 | 0 | 0    | 0      | A |
| 3 | BICF2S23522632         | 82733187 | A | 0.25 | 0.4286 | G |
| 3 | BICF2P290493           | 82744999 | C | 0    | 0      | A |
| 3 | BICF2P1233261          | 82761195 | T | 1    | 1      | A |
| 3 | BICF2P397912           | 82766251 | A | 0.5  | 0.3571 | G |
| 3 | BICF2P397907           | 82767564 | G | 0.25 | 0.2143 | A |
| 3 | TIGRP2P53545_rs8910179 | 82783785 | A | 0.25 | 0.2143 | G |
| 3 | BICF2P109049           | 82790410 | A | 0.5  | 0.3571 | C |
| 3 | BICF2P516591           | 82804094 | G | 0    | 0      | C |
| 3 | BICF2P525577           | 82812087 | C | 0    | 0      | A |
| 3 | BICF2S23222335         | 82843821 | A | 0.25 | 0.2857 | G |
| 3 | BICF2P1021741          | 82847568 | A | 1    | 1      | G |
| 3 | BICF2P337683           | 82865569 | A | 0.75 | 0.5714 | G |
| 3 | BICF2S23342553         | 82869195 | A | 1    | 1      | G |
| 3 | BICF2P1249342          | 82870031 | G | 0    | 0.1429 | A |
| 3 | TIGRP2P53579_rs8974870 | 82883006 | A | 0.5  | 0.5    | C |
| 3 | BICF2P894936           | 82894917 | G | 0.25 | 0.4286 | A |
| 3 | BICF2P858838           | 82904198 | A | 0    | 0      | G |
| 3 | BICF2S23320911         | 82917515 | A | 0.25 | 0.3571 | G |
| 3 | BICF2P461845           | 82928581 | A | 0    | 0      | G |
| 3 | BICF2P263082           | 82940459 | A | 0.25 | 0.3571 | C |
| 3 | BICF2P942586           | 82964671 | A | 0.5  | 0.3571 | C |
| 3 | BICF2P1049730          | 82975253 | 0 | 0    | 0      | A |
| 3 | BICF2P99511            | 82993804 | A | 0.25 | 0.2857 | C |
| 3 | TIGRP2P53619_rs9234379 | 83006482 | A | 0.75 | 0.6429 | G |
| 3 | BICF2P921462           | 83012438 | C | 0.75 | 0.6429 | A |
| 3 | TIGRP2P53620_rs8828953 | 83018546 | G | 0.75 | 0.6429 | A |
| 3 | BICF2P1298241          | 83030135 | A | 1    | 0.8571 | C |
| 3 | BICF2S23024737         | 83044375 | G | 1    | 0.8571 | A |
| 3 | TIGRP2P53639_rs9161436 | 83058149 | C | 0    | 0      | A |
| 3 | TIGRP2P53643_rs8983141 | 83068152 | C | 0    | 0      | A |
| 3 | BICF2S23319317         | 83080708 | A | 0.75 | 0.7143 | G |
| 3 | TIGRP2P53660_rs8817748 | 83088508 | A | 0.25 | 0.3571 | C |
| 3 | TIGRP2P53672_rs8805193 | 83099450 | 0 | 0    | 0      | A |
| 3 | BICF2S23038061         | 83111606 | C | 0.25 | 0.2857 | A |
| 3 | BICF2P1189195          | 83123639 | A | 0.5  | 0.3571 | G |
| 3 | BICF2P207217           | 83133691 | C | 0.25 | 0.2857 | G |
| 3 | BICF2P658659           | 83149347 | G | 0.25 | 0.2857 | A |
| 3 | TIGRP2P53689_rs8704547 | 83158462 | 0 | 0    | 0      | G |
| 3 | BICF2P665409           | 83168613 | A | 0    | 0.1429 | G |
| 3 | BICF2P1347927          | 83191741 | G | 0.75 | 0.5714 | A |
| 3 | TIGRP2P53709_rs8603572 | 83207487 | G | 0.75 | 0.6429 | A |
| 3 | BICF2P1313603          | 83221323 | A | 0    | 0.1429 | G |
| 3 | BICF2P289699           | 83226640 | A | 0.25 | 0.4286 | G |
| 3 | BICF2S23724823         | 83247930 | A | 0    | 0      | G |

|   |                        |          |   |      |        |   |
|---|------------------------|----------|---|------|--------|---|
| 3 | BICF2P376613           | 83249341 | G | 0.25 | 0.2857 | A |
| 3 | BICF2P327951           | 83250031 | A | 0    | 0.1429 | G |
| 3 | BICF2P418337           | 83263121 | G | 0.5  | 0.5    | A |
| 3 | TIGRP2P53724_rs9069573 | 83272139 | A | 0.25 | 0.2143 | T |
| 3 | BICF2P1206866          | 83288530 | 0 | 0    | 0      | A |
| 3 | BICF2P106451           | 83299111 | G | 0.75 | 0.6429 | A |
| 3 | BICF2P520660           | 83312546 | A | 0    | 0.1429 | G |
| 3 | BICF2P490997           | 83325788 | A | 0.25 | 0.4286 | G |
| 3 | BICF2P783430           | 83331530 | G | 0.75 | 0.5714 | C |
| 3 | BICF2S23317675         | 83345121 | A | 0.75 | 0.5714 | G |
| 3 | BICF2P1340843          | 83361269 | G | 0.25 | 0.2143 | A |
| 3 | TIGRP2P53768_rs9238519 | 83366529 | G | 0.25 | 0.2857 | A |
| 3 | BICF2P821092           | 83376818 | A | 0.25 | 0.2857 | G |
| 3 | BICF2S23544955         | 83390731 | G | 1    | 0.8571 | A |
| 3 | BICF2P1329311          | 83410135 | A | 0    | 0      | G |
| 3 | TIGRP2P53783_rs9118797 | 83431877 | A | 0.5  | 0.3571 | G |
| 3 | TIGRP2P53788_rs9081929 | 83441858 | A | 0    | 0      | G |
| 3 | TIGRP2P53789_rs8883486 | 83444407 | C | 1    | 0.8571 | A |
| 3 | BICF2P1281888          | 83456602 | A | 0    | 0      | G |
| 3 | BICF2P332154           | 83470734 | T | 0    | 0      | A |
| 3 | BICF2P863731           | 83484302 | G | 1    | 0.8571 | A |
| 3 | BICF2P1209608          | 83499102 | G | 1    | 0.8571 | A |
| 3 | BICF2P573477           | 83520091 | A | 1    | 0.8571 | T |
| 3 | BICF2S2363742          | 83526124 | 0 | 0    | 0      | G |
| 3 | BICF2P53494            | 83562496 | 0 | 0    | 0      | A |
| 3 | TIGRP2P53829_rs8846258 | 83574104 | A | 0.5  | 0.3571 | G |
| 3 | TIGRP2P53839_rs8678033 | 83592405 | G | 0    | 0      | A |
| 3 | BICF2P156090           | 83604309 | G | 0.5  | 0.3571 | A |
| 3 | BICF2P406943           | 83606491 | G | 0.5  | 0.3571 | A |
| 3 | TIGRP2P53851_rs8800016 | 83625440 | C | 0.5  | 0.3571 | G |
| 3 | TIGRP2P53857_rs8497336 | 83646911 | A | 0.5  | 0.3571 | G |
| 3 | BICF2P494821           | 83654337 | A | 0.5  | 0.3571 | G |
| 3 | BICF2P93316            | 83669119 | G | 0    | 0      | A |
| 3 | TIGRP2P53881_rs9104135 | 83676657 | A | 0.25 | 0.2143 | G |
| 3 | BICF2P628275           | 83685995 | C | 1    | 0.8571 | G |
| 3 | BICF2P589754           | 83706518 | G | 0.75 | 0.6429 | A |
| 3 | TIGRP2P53889_rs8904484 | 83715369 | 0 | 0    | 0      | A |
| 3 | BICF2P280384           | 83726659 | 0 | 0    | 0      | G |
| 3 | TIGRP2P53912_rs9075478 | 83733096 | A | 0.25 | 0.2143 | C |
| 3 | TIGRP2P53926_rs8521009 | 83745309 | A | 1    | 0.8571 | T |
| 3 | BICF2P293673           | 83756106 | 0 | 0    | 0      | A |
| 3 | G261f38S125            | 83775932 | A | 1    | 0.8571 | T |
| 3 | TIGRP2P53931_rs8741851 | 83783206 | 0 | 0    | 0      | G |
| 3 | BICF2P987955           | 83798854 | G | 0    | 0.2143 | A |
| 3 | BICF2S23549123         | 83801163 | G | 0    | 0      | A |
| 3 | BICF2P1158180          | 83819394 | A | 0.25 | 0.2143 | G |
| 3 | BICF2S2351140          | 83828618 | A | 0    | 0      | G |

|   |                        |          |   |      |        |   |
|---|------------------------|----------|---|------|--------|---|
| 3 | BICF2P974752           | 83843926 | A | 0.25 | 0.1    | C |
| 3 | BICF2P1327554          | 83858045 | A | 0.25 | 0.2143 | G |
| 3 | BICF2P1319407          | 83880428 | A | 0.25 | 0.2143 | G |
| 3 | BICF2P213131           | 83884204 | C | 0.25 | 0.2143 | A |
| 3 | BICF2P801483           | 83898298 | G | 0    | 0      | A |
| 3 | BICF2P726412           | 83902791 | G | 0    | 0      | A |
| 3 | BICF2P1070803          | 83920177 | A | 0    | 0      | G |
| 3 | BICF2S2366714          | 83955551 | G | 0    | 0      | A |
| 3 | BICF2P972151           | 83962101 | A | 0    | 0      | G |
| 3 | BICF2P667331           | 83978862 | C | 0    | 0      | A |
| 3 | BICF2P1296708          | 83987349 | 0 | 0    | 0      | A |
| 3 | TIGRP2P53943_rs8908278 | 83997919 | C | 0    | 0      | A |
| 3 | BICF2P1147704          | 84011701 | G | 0.75 | 0.6429 | A |
| 3 | BICF2P1050373          | 84024987 | G | 0.75 | 0.6429 | A |
| 3 | BICF2S23620236         | 84034450 | G | 0    | 0      | A |
| 3 | BICF2S23516729         | 84044485 | A | 0    | 0      | G |
| 3 | BICF2P137158           | 84063248 | 0 | 0    | 0      | A |
| 3 | BICF2P157556           | 84069547 | C | 0    | 0      | A |
| 3 | BICF2P104190           | 84078976 | A | 0.75 | 0.6667 | G |
| 3 | BICF2P167169           | 84089480 | A | 0    | 0      | G |
| 3 | BICF2P375093           | 84104124 | C | 0    | 0      | G |
| 3 | BICF2P294431           | 84121710 | A | 0    | 0      | G |
| 3 | TIGRP2P53960_rs8998545 | 84133182 | G | 0.75 | 0.6429 | A |
| 3 | BICF2P1314918          | 84139326 | A | 0.75 | 0.6429 | G |
| 3 | BICF2P1245917          | 84162993 | 0 | 0    | 0      | A |
| 3 | BICF2P1270358          | 84187273 | A | 0.75 | 0.6429 | G |
| 3 | BICF2P966653           | 84195436 | A | 0    | 0      | G |
| 3 | BICF2S2326180          | 84224129 | A | 0    | 0      | G |
| 3 | BICF2S23538758         | 84252628 | G | 0    | 0      | A |
| 3 | BICF2P761094           | 84265414 | 0 | 0    | 0      | C |
| 3 | BICF2P323251           | 84284506 | 0 | 0    | 0      | A |
| 3 | BICF2P25233            | 84297068 | 0 | 0    | 0      | G |
| 3 | BICF2P592907           | 84328797 | 0 | 0    | 0      | A |
| 3 | BICF2S2339009          | 84344867 | A | 0    | 0      | G |
| 3 | BICF2S23621071         | 84357731 | G | 1    | 1      | A |
| 3 | BICF2P590503           | 84366842 | C | 0    | 0      | A |
| 3 | BICF2P824891           | 84378086 | A | 0    | 0      | G |
| 3 | BICF2S23645832         | 84392498 | A | 0    | 0      | G |
| 3 | BICF2P246579           | 84401380 | C | 1    | 1      | A |
| 3 | BICF2P534349           | 84411029 | A | 1    | 1      | C |
| 3 | BICF2P1205774          | 84423314 | C | 1    | 1      | A |
| 3 | BICF2P406679           | 84433666 | A | 1    | 1      | G |
| 3 | BICF2P531383           | 84447755 | G | 0    | 0      | A |
| 3 | BICF2P532792           | 84457801 | A | 1    | 1      | G |
| 3 | BICF2P1190149          | 84471700 | G | 0    | 0      | A |
| 3 | BICF2P690691           | 84490100 | G | 0.25 | 0.3571 | A |
| 3 | BICF2S23155841         | 84524508 | A | 0.25 | 0.3571 | G |

|   |                        |          |   |      |        |   |
|---|------------------------|----------|---|------|--------|---|
| 3 | BICF2S23218996         | 84530710 | A | 0    | 0      | G |
| 3 | BICF2P884615           | 84545969 | G | 0    | 0      | A |
| 3 | BICF2P29565            | 84552727 | G | 0    | 0      | A |
| 3 | BICF2S2342348          | 84569446 | A | 0    | 0      | G |
| 3 | BICF2S22917428         | 84571107 | A | 0    | 0      | C |
| 3 | BICF2P1091176          | 84587016 | A | 0    | 0      | C |
| 3 | BICF2S23535199         | 84595052 | A | 0    | 0      | G |
| 3 | BICF2P1339623          | 84612353 | A | 0    | 0      | G |
| 3 | BICF2P1088116          | 84622084 | A | 0    | 0      | G |
| 3 | BICF2S23429361         | 84635942 | G | 0    | 0      | A |
| 3 | BICF2P666599           | 84648887 | A | 0    | 0      | G |
| 3 | BICF2S2342085          | 84661795 | C | 0    | 0      | A |
| 3 | TIGRP2P54019_rs8610151 | 84665259 | C | 0.25 | 0.3571 | A |
| 3 | TIGRP2P54021_rs9106848 | 84681767 | A | 0    | 0      | G |
| 3 | BICF2S23733490         | 84699707 | G | 0.25 | 0.3571 | A |
| 3 | BICF2S23327029         | 84712846 | G | 0.75 | 0.6429 | A |
| 3 | BICF2P704014           | 84739032 | A | 0.25 | 0.2143 | G |
| 3 | BICF2P1406832          | 84754945 | G | 1    | 1      | A |
| 3 | BICF2P1406826          | 84755286 | G | 1    | 1      | A |
| 3 | BICF2P380031           | 84777759 | G | 0.25 | 0.3571 | A |
| 3 | BICF2P1213717          | 84790422 | G | 0.75 | 0.6429 | A |
| 3 | TIGRP2P54057_rs9051236 | 84805686 | A | 1    | 0.8571 | G |
| 3 | BICF2P268833           | 84830491 | G | 1    | 1      | A |
| 3 | BICF2P1362134          | 84836043 | G | 0    | 0.1429 | A |
| 3 | BICF2P791308           | 84849711 | G | 0    | 0      | A |
| 3 | BICF2P1076740          | 84860287 | 0 | 0    | 0      | G |
| 3 | BICF2P131107           | 84871295 | A | 0    | 0      | G |
| 3 | TIGRP2P54086_rs9040865 | 84885587 | 0 | 0    | 0      | T |
| 3 | BICF2P785166           | 84917918 | 0 | 0    | 0      | A |
| 3 | BICF2S23746026         | 84934559 | A | 0.75 | 0.7857 | G |
| 3 | BICF2S23316367         | 84944693 | A | 0.75 | 0.7857 | C |
| 3 | BICF2P644431           | 84950240 | A | 0    | 0      | G |
| 3 | BICF2S23335587         | 84959306 | A | 0.25 | 0.2143 | C |
| 3 | BICF2S23330853         | 84962549 | G | 0.25 | 0.2143 | A |
| 3 | BICF2P1447101          | 84976213 | A | 0.25 | 0.3571 | G |
| 3 | TIGRP2P54095_rs9036325 | 84980180 | G | 0.25 | 0.3571 | A |
| 3 | TIGRP2P54102_rs8649896 | 85000432 | A | 0    | 0      | G |
| 3 | TIGRP2P54115_rs9123739 | 85008634 | A | 0.75 | 0.7857 | G |
| 3 | TIGRP2P54233_rs8779655 | 85028067 | C | 0.75 | 0.7857 | G |
| 3 | BICF2P461602           | 85032660 | A | 0.75 | 0.7857 | G |
| 3 | BICF2S23120607         | 85041746 | G | 0.75 | 0.7857 | A |
| 3 | BICF2S23340573         | 85049214 | A | 0    | 0      | G |
| 3 | BICF2P385903           | 85055394 | A | 0.75 | 0.6429 | G |
| 3 | BICF2P1254163          | 85067723 | 0 | 0    | 0      | C |
| 3 | BICF2S24117207         | 85086506 | G | 0    | 0      | A |
| 3 | BICF2P423011           | 85098144 | A | 0    | 0      | C |
| 3 | BICF2P805182           | 85117617 | 0 | 0    | 0      | A |

|   |                        |          |   |      |        |   |
|---|------------------------|----------|---|------|--------|---|
| 3 | BICF2P721731           | 85132407 | 0 | 0    | 0      | A |
| 3 | BICF2P40213            | 85144716 | G | 0.75 | 0.6429 | A |
| 3 | TIGRP2P54246_rs8657228 | 85164426 | 0 | 0    | 0      | G |
| 3 | BICF2S23737307         | 85169998 | A | 0    | 0      | G |
| 3 | BICF2P1379990          | 85185018 | C | 1    | 1      | G |
| 3 | BICF2S23639513         | 85195031 | A | 1    | 1      | G |
| 3 | BICF2P1230210          | 85214288 | 0 | 0    | 0      | A |
| 3 | BICF2P1172537          | 85217406 | A | 1    | 1      | G |
| 3 | TIGRP2P54278_rs8814964 | 85232374 | G | 1    | 1      | C |
| 3 | BICF2P604465           | 85249224 | A | 0    | 0      | C |
| 3 | TIGRP2P54285_rs8993335 | 85250215 | A | 1    | 0.8571 | G |
| 3 | BICF2P233704           | 85271705 | A | 0.75 | 0.6429 | G |
| 3 | BICF2P1283946          | 85275343 | G | 0    | 0      | A |
| 3 | BICF2P1100147          | 85293152 | A | 0    | 0.1429 | G |
| 3 | TIGRP2P54297_rs8830346 | 85304339 | A | 0.25 | 0.2143 | G |
| 3 | BICF2P459737           | 85312835 | G | 0.25 | 0.2143 | C |
| 3 | BICF2S22934159         | 85325315 | C | 0.25 | 0.2143 | G |
| 3 | BICF2P872873           | 85333250 | A | 0.25 | 0.2143 | G |
| 3 | TIGRP2P54318_rs8993068 | 85348386 | A | 0    | 0      | G |
| 3 | BICF2P305308           | 85354181 | C | 0.75 | 0.6429 | A |
| 3 | BICF2S23429590         | 85371914 | 0 | 0    | 0      | G |
| 3 | BICF2P602949           | 85376840 | 0 | 0    | 0      | G |
| 3 | BICF2P340336           | 85396030 | 0 | 0    | 0      | A |
| 3 | BICF2P341502           | 85408186 | 0 | 0    | 0      | A |
| 3 | TIGRP2P54320_rs8750063 | 85419225 | A | 0.25 | 0.3571 | G |
| 3 | TIGRP2P54326_rs9119631 | 85425658 | 0 | 0    | 0      | G |
| 3 | BICF2P680033           | 85439712 | A | 0.25 | 0.3571 | G |
| 3 | TIGRP2P54329_rs9153128 | 85445971 | G | 0.25 | 0.3571 | A |
| 3 | BICF2P485381           | 85473616 | A | 0.25 | 0.3571 | G |
| 3 | TIGRP2P54362_rs9232807 | 85487544 | A | 0    | 0      | G |
| 3 | TIGRP2P54368_rs9023687 | 85491248 | A | 0    | 0      | G |
| 3 | BICF2P73594            | 85508096 | G | 0.75 | 0.6429 | A |
| 3 | BICF2P825508           | 85517063 | A | 0.75 | 0.6429 | G |
| 3 | BICF2P1184786          | 85533280 | 0 | 0    | 0      | G |
| 3 | TIGRP2P54391_rs9008388 | 85557597 | A | 0    | 0      | G |
| 3 | BICF2S2374373          | 85577997 | A | 1    | 1      | G |
| 3 | BICF2S2374372          | 85578269 | C | 1    | 1      | A |
| 3 | BICF2S2336388          | 85589719 | 0 | 0    | 0      | T |
| 3 | BICF2S23231050         | 85594990 | A | 0    | 0      | C |
| 3 | BICF2S229186           | 85608697 | G | 0    | 0.1429 | A |
| 3 | TIGRP2P54395_rs8895672 | 85640400 | C | 0    | 0.1429 | A |
| 3 | BICF2P1212167          | 85647926 | C | 0    | 0.1429 | A |
| 3 | BICF2S23541438         | 85656214 | A | 0    | 0      | G |
| 3 | TIGRP2P54421_rs8803573 | 85668105 | G | 0    | 0.1429 | A |
| 3 | TIGRP2P54428_rs8680040 | 85684974 | A | 0    | 0.1429 | G |
| 3 | BICF2P512037           | 85689826 | G | 1    | 1      | A |
| 3 | BICF2S23421003         | 85702073 | G | 1    | 1      | A |

|   |                        |          |   |      |        |   |
|---|------------------------|----------|---|------|--------|---|
| 3 | BICF2P978779           | 85715602 | A | 1    | 1      | G |
| 3 | BICF2P659903           | 85732393 | A | 0    | 0      | G |
| 3 | TIGRP2P54443_rs8932828 | 85736134 | A | 1    | 1      | G |
| 3 | BICF2P1501195          | 85747824 | G | 1    | 1      | A |
| 3 | TIGRP2P54447_rs8784158 | 85756854 | G | 1    | 1      | A |
| 3 | BICF2S23326188         | 85771925 | A | 0    | 0.1429 | G |
| 3 | BICF2P98099            | 85788553 | A | 1    | 1      | G |
| 3 | BICF2P98100            | 85788686 | A | 1    | 0.8571 | C |
| 3 | BICF2P186550           | 85790043 | A | 1    | 1      | G |
| 3 | BICF2P357365           | 85804819 | C | 0    | 0      | G |
| 3 | BICF2P104002           | 85814856 | A | 0    | 0.1429 | G |
| 3 | BICF2P445309           | 85824704 | G | 0    | 0.1429 | A |
| 3 | TIGRP2P54459_rs8554281 | 85864893 | G | 0.25 | 0.3571 | A |
| 3 | BICF2S2353371          | 85874493 | A | 0.25 | 0.3571 | G |
| 3 | TIGRP2P54471_rs8694649 | 85887162 | A | 0.25 | 0.3571 | G |
| 3 | TIGRP2P54476_rs9139863 | 85898534 | G | 0.25 | 0.3571 | A |
| 3 | TIGRP2P54491_rs8967010 | 85910193 | C | 0.25 | 0.3333 | A |
| 3 | BICF2P658181           | 85910634 | G | 0.25 | 0.3571 | A |
| 3 | BICF2P1402829          | 85925485 | G | 0.25 | 0.3571 | A |
| 3 | BICF2P1363900          | 85932776 | T | 0.25 | 0.3571 | A |
| 3 | BICF2S23115040         | 85939679 | G | 0.25 | 0.2143 | A |
| 3 | BICF2P945593           | 85951618 | G | 0.25 | 0.2143 | A |
| 3 | BICF2P996639           | 85963233 | G | 1    | 1      | A |
| 3 | BICF2S22937367         | 85983036 | A | 0.75 | 0.6429 | G |
| 3 | BICF2P284759           | 85987286 | 0 | 0    | 0      | A |
| 3 | BICF2P1504745          | 86001737 | A | 0    | 0      | G |
| 3 | BICF2P240147           | 86012264 | 0 | 0    | 0      | A |
| 3 | BICF2S23013072         | 86035993 | G | NA   | 0.5    | A |
| 3 | BICF2P118538           | 86052252 | G | 0.25 | 0.3571 | A |
| 3 | BICF2P1248122          | 86072424 | A | 0    | 0      | G |
| 3 | BICF2S23255121         | 86088077 | A | 0.75 | 0.6429 | G |
| 3 | BICF2S23254797         | 86091708 | G | 0.75 | 0.6667 | A |
| 3 | G263f41S60             | 86112699 | G | 0    | 0.1429 | A |
| 3 | BICF2S23050492         | 86140007 | A | 0    | 0      | G |
| 3 | BICF2P595766           | 86148223 | G | 1    | 0.8571 | A |
| 3 | BICF2P1220445          | 86160759 | A | 0.25 | 0.2143 | G |
| 3 | BICF2P1258895          | 86169673 | G | 0.25 | 0.2143 | A |
| 3 | BICF2S23236388         | 86182534 | G | 0    | 0      | A |
| 3 | BICF2S23648437         | 86198841 | G | 0    | 0      | A |
| 3 | BICF2S23734615         | 86212021 | G | 1    | 1      | A |
| 3 | BICF2P479234           | 86217478 | G | 1    | 1      | A |
| 3 | BICF2P143331           | 86229784 | A | 0    | 0      | G |
| 3 | TIGRP2P54533_rs8609660 | 86241578 | C | 0    | 0      | A |
| 3 | BICF2P988491           | 86251480 | A | 0    | 0      | C |
| 3 | TIGRP2P54553_rs9019590 | 86270985 | C | 0    | 0      | A |
| 3 | TIGRP2P54568_rs8872042 | 86278497 | C | 0    | 0      | A |
| 3 | BICF2P678427           | 86284939 | A | 0    | 0      | G |

|   |                        |          |   |      |         |   |
|---|------------------------|----------|---|------|---------|---|
| 3 | TIGRP2P54579_rs8631111 | 86300409 | G | 0    | 0       | A |
| 3 | BICF2S23725924         | 86311306 | G | 0    | 0       | A |
| 3 | BICF2S2335282          | 86322701 | G | 0    | 0       | A |
| 3 | BICF2P171964           | 86331041 | O | 0    | 0       | G |
| 3 | BICF2P972570           | 86347221 | C | 0.25 | 0.2143  | A |
| 3 | BICF2S22915988         | 86349925 | G | 0    | 0       | A |
| 3 | BICF2P997826           | 86354628 | A | 0.25 | 0.3571  | G |
| 3 | BICF2S23646854         | 86372185 | T | 0.25 | 0.3571  | A |
| 3 | BICF2S2371005          | 86378924 | G | 0    | 0.1429  | A |
| 3 | TIGRP2P54622_rs8529807 | 86397551 | C | 0.75 | 0.7857  | A |
| 3 | BICF2P872327           | 86403839 | G | 0.75 | 0.7857  | A |
| 3 | BICF2P845255           | 86412804 | G | 0.75 | 0.7857  | A |
| 3 | BICF2P477119           | 86432265 | G | 0    | 0       | A |
| 3 | BICF2P692472           | 86437117 | G | 0.75 | 0.7857  | A |
| 3 | BICF2P1046949          | 86445497 | O | 0    | 0       | A |
| 3 | BICF2P1046953          | 86446985 | C | 0.75 | 0.7857  | A |
| 3 | BICF2P1269599          | 86468147 | G | 0.75 | 0.7857  | A |
| 3 | TIGRP2P54641_rs8837605 | 86470336 | A | 0.75 | 0.7857  | G |
| 3 | BICF2P866743           | 86481742 | A | 0.75 | 0.7857  | G |
| 3 | BICF2P677825           | 86494938 | A | 0.75 | 0.7857  | G |
| 3 | BICF2P1322449          | 86525684 | G | 0.75 | 0.7857  | A |
| 3 | BICF2P495288           | 86531507 | A | 0.75 | 0.7857  | G |
| 3 | BICF2P1157267          | 86546302 | A | 0    | 0.08333 | C |
| 3 | TIGRP2P54664_rs9035952 | 86550672 | A | 0.25 | 0.2143  | G |
| 3 | BICF2P161091           | 86562584 | A | 0    | 0.1429  | G |
| 3 | TIGRP2P54686_rs9006094 | 86575198 | A | 0    | 0       | G |
| 3 | BICF2P55526            | 86591178 | G | 0    | 0       | A |
| 3 | BICF2S2295729          | 86596620 | A | 0.75 | 0.7857  | G |
| 3 | BICF2S23136096         | 86612659 | G | 0    | 0.1429  | A |
| 3 | BICF2S23125423         | 86619301 | G | 0    | 0.1429  | A |
| 3 | BICF2P1430054          | 86639713 | G | 0.75 | 0.7857  | A |
| 3 | BICF2P453459           | 86644273 | A | 0    | 0       | G |
| 3 | TIGRP2P54734_rs9099263 | 86663806 | G | 0    | 0       | A |
| 3 | BICF2P264030           | 86665477 | C | 0.75 | 0.7857  | A |
| 3 | TIGRP2P54743_rs8694610 | 86676611 | A | 0    | 0.1429  | T |
| 3 | TIGRP2P54751_rs8715177 | 86689744 | G | 0.75 | 0.7857  | A |
| 3 | TIGRP2P54760_rs9235980 | 86704402 | G | 0    | 0       | A |
| 3 | BICF2P869845           | 86732079 | G | 0.75 | 0.6429  | A |
| 3 | BICF2P152485           | 86733643 | G | 0.75 | 0.6429  | A |
| 3 | BICF2P850481           | 86745035 | O | 0    | 0       | A |
| 3 | BICF2P471295           | 86763411 | A | 0.25 | 0.3571  | G |
| 3 | TIGRP2P54788_rs8976376 | 86782192 | G | 0.75 | 0.7857  | A |
| 3 | BICF2S23750064         | 86801163 | G | 0.25 | 0.3571  | A |
| 3 | BICF2S23753732         | 86803219 | A | 0    | 0       | G |
| 3 | BICF2P1343705          | 86814586 | C | 0    | 0       | A |
| 3 | BICF2G630353868        | 86823281 | A | 0    | 0       | C |
| 3 | BICF2G630353890        | 86835275 | C | 0.75 | 0.7857  | G |



|   |                        |          |   |      |        |   |
|---|------------------------|----------|---|------|--------|---|
| 3 | BICF2G630353893        | 86836550 | A | 0.75 | 0.7857 | G |
| 3 | BICF2P688357           | 86849529 | A | 1    | 1      | C |
| 3 | BICF2G630353909        | 86858401 | A | 0    | 0      | G |
| 3 | BICF2G630353913        | 86861508 | A | 1    | 1      | G |
| 3 | BICF2G630353933        | 86875054 | C | 0    | 0      | A |
| 3 | BICF2S22926677         | 86887809 | A | 0.25 | 0.2143 | C |
| 3 | BICF2G630353937        | 86897716 | A | 0.25 | 0.3571 | G |
| 3 | BICF2G630353938        | 86915512 | G | 0.25 | 0.3571 | A |
| 3 | TIGRP2P54812_rs8614417 | 86928489 | 0 | 0    | 0      | A |
| 3 | BICF2S2342150          | 86948527 | A | 0.25 | 0.2143 | G |
| 3 | BICF2S23624701         | 86961225 | G | 0.25 | 0.2143 | A |
| 3 | BICF2S24415473         | 86974042 | G | 0.25 | 0.2143 | A |
| 3 | BICF2P1171201          | 86989506 | G | 0.25 | 0.2143 | A |
| 3 | BICF2G630353950        | 86998520 | A | 0    | 0      | G |
| 3 | BICF2G630353960        | 87009772 | A | 0    | 0      | G |
| 3 | BICF2P714471           | 87024213 | A | 0.25 | 0.2143 | G |
| 3 | BICF2G630353969        | 87040724 | G | 0.75 | 0.6429 | A |
| 3 | BICF2G630353970        | 87043914 | G | 0    | 0      | A |
| 3 | BICF2P357975           | 87055519 | A | 0.25 | 0.2143 | G |
| 3 | BICF2G630353978        | 87069600 | A | 0    | 0      | G |
| 3 | TIGRP2P54845_rs8745137 | 87080529 | G | 0.75 | 0.7857 | A |
| 3 | BICF2G630354004        | 87098004 | G | 0.75 | 0.6429 | A |
| 3 | BICF2G630354028        | 87110416 | A | 0.25 | 0.3571 | G |
| 3 | BICF2G630354054        | 87122431 | A | 0.75 | 0.6429 | C |
| 3 | BICF2S23044057         | 87127127 | A | 0    | 0      | G |
| 3 | BICF2G630354070        | 87137693 | A | 0.75 | 0.6429 | C |
| 3 | BICF2G630354090        | 87148877 | A | 0.75 | 0.7857 | G |
| 3 | BICF2G630354100        | 87158880 | G | 0.75 | 0.6429 | A |
| 3 | BICF2G630354113        | 87175709 | G | 1    | 0.8571 | A |
| 3 | BICF2G630354117        | 87180410 | G | 1    | 0.8571 | A |
| 3 | BICF2G630354118        | 87181098 | G | 1    | 0.8571 | A |
| 3 | BICF2G630354121        | 87183671 | G | 1    | 1      | A |
| 3 | BICF2P25746            | 87193941 | A | 1    | 1      | G |
| 3 | BICF2G630354161        | 87208542 | G | 0    | 0.1429 | A |
| 3 | BICF2P233426           | 87227061 | A | 0    | 0.1429 | G |
| 3 | BICF2G630354176        | 87238147 | A | 1    | 0.9167 | G |
| 3 | BICF2G630354178        | 87238784 | A | 1    | 0.8571 | G |
| 3 | BICF2G630354185        | 87240247 | A | 0    | 0      | G |
| 3 | BICF2G630354211        | 87260088 | A | 1    | 0.8571 | G |
| 3 | BICF2S2372445          | 87264628 | A | 1    | 1      | G |
| 3 | BICF2S23322019         | 87281824 | G | 0    | 0      | A |
| 3 | BICF2G630354227        | 87287907 | A | 0    | 0      | G |
| 3 | BICF2G630354247        | 87293739 | G | 0    | 0      | A |
| 3 | BICF2P540899           | 87298569 | A | 0.25 | 0.3571 | G |
| 3 | BICF2S23331953         | 87314488 | 0 | 0    | 0      | A |
| 3 | BICF2G630354291        | 87328476 | G | 0.75 | 0.6429 | A |
| 3 | BICF2G630354295        | 87335463 | A | 0    | 0      | G |

|   |                        |          |   |      |        |   |
|---|------------------------|----------|---|------|--------|---|
| 3 | BICF2G630354311        | 87345610 | A | 0    | 0      | G |
| 3 | BICF2S23428498         | 87363835 | A | 0.25 | 0.2857 | C |
| 3 | BICF2G630354353        | 87384657 | A | 0    | 0      | G |
| 3 | BICF2P86187            | 87389771 | 0 | 0    | 0      | G |
| 3 | BICF2S23524859         | 87409491 | G | 0    | 0      | A |
| 3 | BICF2P1218152          | 87419347 | G | 0.75 | 0.7143 | A |
| 3 | BICF2G630354380        | 87430807 | C | 0.75 | 0.7143 | A |
| 3 | BICF2G630354395        | 87435544 | G | 0.75 | 0.7143 | A |
| 3 | BICF2G630354399        | 87448468 | A | 0.75 | 0.7143 | G |
| 3 | BICF2S23159175         | 87456447 | G | 0    | 0      | A |
| 3 | BICF2G630354407        | 87464393 | T | 0    | 0      | A |
| 3 | BICF2P83915            | 87478706 | C | 0    | 0      | A |
| 3 | BICF2P83911            | 87480167 | A | 0    | 0      | G |
| 3 | BICF2S2314217          | 87491770 | T | 0    | 0      | A |
| 3 | BICF2P527602           | 87498668 | 0 | 0    | 0      | A |
| 3 | TIGRP2P54976_rs8765673 | 87513623 | T | 0    | 0      | A |
| 3 | BICF2G630354410        | 87517616 | A | 0    | 0      | C |
| 3 | BICF2P1342955          | 87528392 | C | 0    | 0      | A |
| 3 | BICF2P786531           | 87540447 | A | 0    | 0      | G |
| 3 | BICF2P1410883          | 87556948 | A | 0.5  | 0.3571 | G |
| 3 | BICF2P639445           | 87565740 | A | 0.5  | 0.5    | G |
| 3 | BICF2P529273           | 87572866 | G | 0.25 | 0.2857 | A |
| 3 | BICF2P349              | 87587606 | A | 0.25 | 0.3571 | C |
| 3 | BICF2P718095           | 87597329 | C | 0    | 0.1429 | A |
| 3 | BICF2P1439630          | 87612795 | G | 0.25 | 0.2143 | A |
| 3 | TIGRP2P55093_rs8873590 | 87619090 | A | 0    | 0      | G |
| 3 | TIGRP2P55102_rs8659844 | 87646010 | G | 0.5  | 0.5    | A |
| 3 | TIGRP2P55107_rs8536869 | 87662664 | G | 0    | 0      | A |
| 3 | BICF2P1383213          | 87664894 | A | 0    | 0      | G |
| 3 | BICF2P296559           | 87677563 | A | 0.5  | 0.6429 | C |
| 3 | BICF2P467821           | 87687756 | A | 0    | 0      | G |
| 3 | TIGRP2P55124_rs8698359 | 87699246 | A | 0    | 0.1429 | C |
| 3 | BICF2S23115974         | 87718312 | A | 0    | 0      | G |
| 3 | BICF2P965687           | 87724489 | A | 0    | 0.1429 | G |
| 3 | TIGRP2P55135_rs9182432 | 87740825 | G | 0.5  | 0.5    | A |
| 3 | TIGRP2P55142_rs8633645 | 87750605 | G | 0    | 0.1429 | A |
| 3 | TIGRP2P55145_rs9069918 | 87763014 | G | 0.5  | 0.5    | A |
| 3 | TIGRP2P55155_rs9168928 | 87790773 | A | 0.5  | 0.3571 | C |
| 3 | BICF2G630354481        | 87802430 | C | 0.5  | 0.3571 | A |
| 3 | BICF2G630354486        | 87804060 | G | 0    | 0      | A |
| 3 | TIGRP2P55162_rs9014022 | 87817240 | 0 | 0    | 0      | A |
| 3 | BICF2S23716752         | 87830585 | A | 0    | 0.1429 | C |
| 3 | BICF2G630354516        | 87838490 | A | 1    | 0.8571 | G |
| 3 | BICF2P785990           | 87849460 | 0 | 0    | 0      | C |
| 3 | BICF2G630354549        | 87861393 | A | 0    | 0      | G |
| 3 | BICF2G630354573        | 87872088 | G | 0    | 0.1429 | A |
| 3 | BICF2G630354615        | 87890888 | A | 1    | 1      | G |

|   |                        |          |   |      |        |   |
|---|------------------------|----------|---|------|--------|---|
| 3 | BICF2G630354623        | 87894691 | 0 | 0    | 0      | G |
| 3 | BICF2G630354651        | 87913266 | G | 0    | 0      | A |
| 3 | BICF2G630354660        | 87917531 | A | 0.5  | 0.6429 | G |
| 3 | BICF2G630354679        | 87929093 | A | 0.25 | 0.3571 | G |
| 3 | BICF2G630354725        | 87948518 | G | 0.25 | 0.3571 | A |
| 3 | BICF2P754440           | 87961120 | A | 0.5  | 0.3571 | G |
| 3 | BICF2G630354733        | 87967409 | A | 0.25 | 0.2143 | G |
| 3 | TIGRP2P55183_rs8574209 | 87976703 | A | 0    | 0      | G |
| 3 | BICF2G630354781        | 87987914 | A | 0    | 0      | G |
| 3 | BICF2P1008034          | 88007430 | G | 0    | 0      | C |
| 3 | BICF2P1116832          | 88010533 | G | 0.5  | 0.3571 | A |
| 3 | BICF2P244762           | 88039909 | A | 0.25 | 0.2143 | G |
| 3 | BICF2P504292           | 88051536 | G | 0.25 | 0.2857 | A |
| 3 | BICF2P733834           | 88055521 | A | 0.75 | 0.7857 | C |
| 3 | BICF2G630354843        | 88071328 | A | 0.25 | 0.2143 | G |
| 3 | BICF2G630354859        | 88080183 | A | 0    | 0      | C |
| 3 | BICF2S23536469         | 88096201 | A | 0.25 | 0.2143 | G |
| 3 | TIGRP2P55255_rs8563210 | 88103432 | A | 0    | 0      | G |
| 3 | BICF2S23336675         | 88103633 | G | 0.75 | 0.6429 | A |
| 3 | BICF2S2342753          | 88109868 | A | 0.75 | 0.6429 | G |
| 3 | BICF2G630354922        | 88116331 | A | 0.75 | 0.5714 | C |
| 3 | BICF2G630354937        | 88130429 | G | 0.25 | 0.2143 | A |
| 3 | BICF2G630354944        | 88137822 | A | 0    | 0      | G |
| 3 | TIGRP2P55281_rs8884009 | 88146237 | G | 0.75 | 0.5714 | A |
| 3 | BICF2G630354947        | 88156919 | G | 0.25 | 0.4286 | A |
| 3 | BICF2G630354955        | 88159126 | G | 0.25 | 0.4286 | A |
| 3 | BICF2G630354969        | 88172792 | A | 0.25 | 0.4286 | G |
| 3 | BICF2P548970           | 88210401 | A | 0    | 0      | G |
| 3 | BICF2G630355069        | 88222437 | G | 0.25 | 0.4286 | A |
| 3 | BICF2P1453147          | 88230573 | A | 0    | 0      | T |
| 3 | BICF2G630355103        | 88240942 | A | 0.25 | 0.4286 | G |
| 3 | BICF2G630355149        | 88256788 | A | 0    | 0      | G |
| 3 | BICF2G630355158        | 88264568 | C | 0    | 0      | A |
| 3 | BICF2G630355176        | 88275058 | G | 0.25 | 0.4286 | A |
| 3 | BICF2P759838           | 88291044 | A | 0.25 | 0.4286 | T |
| 3 | BICF2G630355187        | 88302348 | G | 0.25 | 0.2857 | A |
| 3 | BICF2P160533           | 88318463 | G | 0.75 | 0.7857 | A |
| 3 | BICF2G630355218        | 88329354 | G | 0    | 0      | A |
| 3 | BICF2G630355223        | 88331575 | A | 0    | 0      | G |
| 3 | BICF2P1385640          | 88334903 | A | 0    | 0      | G |
| 3 | BICF2P846449           | 88350962 | G | 0.25 | 0.2857 | A |
| 3 | BICF2P846438           | 88354629 | A | 0.25 | 0.2857 | G |
| 3 | BICF2S2415484          | 88407530 | A | 0.25 | 0.2857 | G |
| 3 | BICF2P1269894          | 88421670 | 0 | 0    | 0      | A |
| 3 | BICF2S23723485         | 88430732 | G | 0.25 | 0.2857 | A |
| 3 | BICF2S23135712         | 88440500 | A | 0    | 0      | G |
| 3 | BICF2G630355258        | 88467411 | A | 0    | 0      | C |

|   |                        |          |   |      |        |   |
|---|------------------------|----------|---|------|--------|---|
| 3 | BICF2G630355260        | 88470055 | A | 0.25 | 0.2857 | C |
| 3 | BICF2P527426           | 88492158 | 0 | 0    | 0      | G |
| 3 | BICF2S23048528         | 88494320 | A | 0    | 0      | G |
| 3 | BICF2S2297778          | 88506450 | A | 0    | 0      | G |
| 3 | BICF2P321713           | 88512406 | 0 | 0    | 0      | A |
| 3 | BICF2G630355275        | 88524973 | G | 0    | 0      | A |
| 3 | BICF2S23416517         | 88533180 | A | 0.75 | 0.7143 | G |
| 3 | BICF2G630355286        | 88543508 | A | 0    | 0      | G |
| 3 | BICF2G630355296        | 88553757 | A | 0    | 0      | G |
| 3 | BICF2G630355317        | 88562463 | A | 0    | 0      | G |
| 3 | BICF2G630355367        | 88578968 | A | 0    | 0      | G |
| 3 | BICF2G630355378        | 88585595 | G | 0.25 | 0.2857 | A |
| 3 | TIGRP2P55389_rs8902261 | 88600745 | A | 0.25 | 0.2857 | G |
| 3 | BICF2G630355422        | 88607867 | A | 0.25 | 0.2857 | G |
| 3 | BICF2G630355434        | 88621090 | G | 0.25 | 0.2857 | A |
| 3 | BICF2G630355441        | 88631803 | A | 0    | 0      | G |
| 3 | BICF2G630355445        | 88636523 | G | 0.25 | 0.2857 | A |
| 3 | BICF2P1316274          | 88643658 | G | 0.25 | 0.2857 | A |
| 3 | BICF2G630355451        | 88657763 | A | 0.25 | 0.2857 | T |
| 3 | BICF2P298966           | 88661363 | A | 0    | 0      | G |
| 3 | BICF2P1188903          | 88684315 | G | 0.25 | 0.2857 | A |
| 3 | BICF2G630355467        | 88688943 | A | 0.75 | 0.7143 | G |
| 3 | BICF2P1400938          | 88709676 | A | 0    | 0      | G |
| 3 | BICF2G630355477        | 88712844 | A | 0    | 0      | C |
| 3 | BICF2P326103           | 88722536 | 0 | 0    | 0      | G |
| 3 | BICF2G630355506        | 88730294 | A | 0.75 | 0.7143 | G |
| 3 | BICF2G630355520        | 88737074 | A | 1    | 1      | G |
| 3 | BICF2G630355529        | 88746254 | G | 0.75 | 0.7143 | A |
| 3 | BICF2G630355542        | 88759196 | G | 0.25 | 0.2857 | A |
| 3 | BICF2G630355559        | 88776538 | A | 0    | 0      | G |
| 3 | BICF2G630355567        | 88782868 | C | 0    | 0      | A |
| 3 | BICF2G630355588        | 88800079 | A | 0.5  | 0.5    | G |
| 3 | TIGRP2P55427_rs8618538 | 88808988 | A | 0    | 0      | G |
| 3 | BICF2G630355615        | 88819842 | A | 0.5  | 0.5    | G |
| 3 | BICF2G630355625        | 88826870 | A | 0.5  | 0.5    | G |
| 3 | BICF2P394014           | 88843548 | G | 0.25 | 0.2857 | A |
| 3 | BICF2G630355646        | 88855677 | G | 0.25 | 0.2143 | A |
| 3 | BICF2G630355670        | 88864725 | A | 0.25 | 0.2857 | T |
| 3 | BICF2G630355701        | 88879079 | A | 0    | 0      | G |
| 3 | TIGRP2P55431_rs9116380 | 88893816 | A | 0    | 0      | G |
| 3 | BICF2G630355714        | 88897174 | G | 0.75 | 0.7857 | A |
| 3 | TIGRP2P55432_rs8807909 | 88926600 | G | 0    | 0      | A |
| 3 | BICF2G630355732        | 88939019 | A | 0    | 0      | C |
| 3 | BICF2G630355738        | 88941999 | G | 0.25 | 0.2857 | A |
| 3 | BICF2G630355758        | 88953365 | G | 0    | 0      | A |
| 3 | BICF2P853105           | 88965070 | A | 0.5  | 0.5    | G |
| 3 | BICF2S24318709         | 88985716 | G | 0.5  | 0.5    | A |

|   |                        |          |   |      |        |   |
|---|------------------------|----------|---|------|--------|---|
| 3 | BICF2G630355828        | 88989230 | G | 0.25 | 0.2857 | A |
| 3 | BICF2G630355851        | 89004408 | A | 0.25 | 0.2857 | G |
| 3 | BICF2P1404126          | 89013551 | A | 0.75 | 0.7857 | G |
| 3 | BICF2P1326614          | 89023174 | O | 0    | 0      | T |
| 3 | BICF2P778113           | 89031642 | A | 0.25 | 0.2857 | G |
| 3 | BICF2G630355875        | 89040117 | G | 0    | 0      | A |
| 3 | BICF2G630355876        | 89040160 | G | 0.25 | 0.2143 | A |
| 3 | BICF2G630355893        | 89050253 | G | 0.25 | 0.2143 | A |
| 3 | BICF2G630355909        | 89056035 | A | 0.25 | 0.2143 | C |
| 3 | BICF2G630355937        | 89070950 | A | 0    | 0      | G |
| 3 | BICF2G630355949        | 89082340 | A | 0    | 0      | G |
| 3 | BICF2G630355956        | 89092267 | A | 0.25 | 0.2143 | G |
| 3 | BICF2S23445034         | 89102109 | A | 0    | 0      | G |
| 3 | BICF2G630355965        | 89115451 | G | 0    | 0      | A |
| 3 | BICF2G630355982        | 89135642 | G | 0    | 0      | A |
| 3 | BICF2S23347031         | 89146316 | A | 0    | 0      | G |
| 3 | BICF2G630356013        | 89151306 | G | 0.25 | 0.2143 | A |
| 3 | BICF2G630356026        | 89159078 | A | 0    | 0      | G |
| 3 | BICF2G630356027        | 89159216 | A | 0    | 0      | G |
| 3 | BICF2S2346012          | 89159812 | A | 0    | 0      | G |
| 3 | BICF2G630356044        | 89172826 | A | 0.5  | 0.5    | G |
| 3 | BICF2G630356073        | 89186028 | A | 0.25 | 0.2857 | G |
| 3 | BICF2P514014           | 89195373 | C | 0    | 0      | A |
| 3 | BICF2G630356099        | 89216567 | G | 0.25 | 0.2143 | A |
| 3 | BICF2P228434           | 89218315 | A | 0.25 | 0.2143 | G |
| 3 | BICF2G630356112        | 89224916 | A | 0    | 0      | T |
| 3 | BICF2G630356115        | 89229582 | G | NA   | NA     | A |
| 3 | BICF2P1253474          | 89243765 | G | 0.5  | 0.5    | A |
| 3 | BICF2G630356171        | 89261683 | A | 0    | 0      | G |
| 3 | BICF2G630356178        | 89267065 | A | 0    | 0      | G |
| 3 | BICF2G630356195        | 89284056 | G | 1    | 1      | A |
| 3 | BICF2G630356200        | 89285807 | A | 1    | 1      | C |
| 3 | BICF2G630356205        | 89287012 | A | 0.5  | 0.5    | G |
| 3 | BICF2G630356221        | 89299322 | A | 0.25 | 0.2143 | G |
| 3 | BICF2P1416281          | 89309010 | A | 0    | 0      | G |
| 3 | BICF2G630356255        | 89321536 | G | 0.25 | 0.2143 | A |
| 3 | BICF2P881093           | 89335949 | A | 0.25 | 0.2857 | G |
| 3 | BICF2P605518           | 89343330 | A | 0    | 0      | T |
| 3 | BICF2P544534           | 89352825 | A | 0.75 | 0.7857 | G |
| 3 | BICF2P297559           | 89355248 | G | 0    | 0      | A |
| 3 | BICF2G630356326        | 89388259 | A | 0.25 | 0.2857 | G |
| 3 | TIGRP2P55490_rs8868634 | 89392461 | A | 0.25 | 0.2143 | G |
| 3 | BICF2P857116           | 89402283 | G | 0.25 | 0.2143 | A |
| 3 | BICF2P1343469          | 89419819 | C | 0.25 | 0.2143 | A |
| 3 | BICF2P977797           | 89431260 | A | 0.5  | 0.5    | G |
| 3 | BICF2P1176918          | 89444236 | G | 0.5  | 0.5    | A |
| 3 | BICF2P346845           | 89449609 | A | 0    | 0      | C |

|   |                        |          |   |      |        |   |
|---|------------------------|----------|---|------|--------|---|
| 3 | BICF2P329146           | 89461817 | G | 0    | 0      | A |
| 3 | BICF2P101048           | 89472215 | A | 0    | 0      | G |
| 3 | BICF2P1418480          | 89490312 | 0 | 0    | 0      | G |
| 3 | TIGRP2P55525_rs8735190 | 89495882 | G | 0.5  | 0.5    | A |
| 3 | TIGRP2P55530_rs9107251 | 89510966 | A | 0    | 0      | C |
| 3 | BICF2P1141118          | 89517733 | A | 0    | 0      | C |
| 3 | BICF2P1133207          | 89531836 | G | 1    | 1      | A |
| 3 | BICF2P1295882          | 89541710 | G | 0    | 0      | A |
| 3 | BICF2G630356365        | 89551297 | A | 0    | 0      | C |
| 3 | BICF2G630356396        | 89563948 | G | 0    | 0      | C |
| 3 | BICF2G630356417        | 89573640 | A | 0    | 0      | G |
| 3 | BICF2P1426993          | 89592661 | 0 | 0    | 0      | A |
| 3 | BICF2G630356442        | 89598786 | A | 0.5  | 0.5    | G |
| 3 | BICF2G630356452        | 89618611 | A | 0    | 0      | G |
| 3 | BICF2G630356455        | 89623082 | A | 0    | 0      | G |
| 3 | BICF2G630356463        | 89631192 | A | 0    | 0      | G |
| 3 | BICF2G630356484        | 89642627 | C | 0    | 0      | A |
| 3 | BICF2G630356516        | 89654003 | C | 0.75 | 0.7143 | A |
| 3 | BICF2G630356604        | 89678792 | G | 0.25 | 0.2857 | A |
| 3 | BICF2G630356628        | 89689045 | A | 0.25 | 0.2857 | C |
| 3 | BICF2S2318439          | 89702266 | G | 0.25 | 0.2857 | A |
| 3 | TIGRP2P55579_rs9187865 | 89714506 | A | 0.5  | 0.5    | G |
| 3 | BICF2S22913163         | 89729794 | A | 0.25 | 0.2143 | G |
| 3 | BICF2S23216860         | 89752511 | G | 0    | 0      | A |
| 3 | BICF2S22917719         | 89765429 | A | 0    | 0      | G |
| 3 | BICF2G630356647        | 89775440 | A | 0    | 0      | G |
| 3 | BICF2G630356655        | 89781992 | T | 0.25 | 0.2857 | A |
| 3 | BICF2G630356669        | 89793145 | A | 0    | 0      | G |
| 3 | BICF2G630356689        | 89803710 | A | 0.5  | 0.5    | G |
| 3 | BICF2G630356714        | 89820656 | A | 0.5  | 0.5    | G |
| 3 | BICF2G630356729        | 89827681 | A | 0.5  | 0.5    | G |
| 3 | BICF2P1164525          | 89838155 | C | 0    | 0      | A |
| 3 | BICF2G630356766        | 89850126 | G | 0.5  | 0.5    | A |
| 3 | TIGRP2P55601_rs8863097 | 89877535 | A | 0.25 | 0.2857 | C |
| 3 | BICF2P151582           | 89878445 | G | 0.25 | 0.2857 | A |
| 3 | BICF2P457751           | 89882180 | A | 0.25 | 0.2857 | G |
| 3 | BICF2P267040           | 89892953 | A | 0.25 | 0.2857 | G |
| 3 | BICF2G630356780        | 89904012 | G | 0    | 0      | A |
| 3 | BICF2G630356788        | 89910136 | A | 0.25 | 0.2143 | G |
| 3 | BICF2G630356817        | 89922792 | A | 0.25 | 0.2143 | G |
| 3 | BICF2G630356837        | 89935922 | A | 0.25 | 0.2857 | G |
| 3 | BICF2G630356866        | 89948783 | A | 0.5  | 0.5    | C |
| 3 | BICF2P1021583          | 89953056 | A | 0.75 | 0.7143 | G |
| 3 | BICF2G630356932        | 89967365 | G | 0.25 | 0.2857 | A |
| 3 | BICF2G630356957        | 89977511 | G | 0.5  | 0.5    | A |
| 3 | BICF2G630356983        | 89988327 | G | 0.75 | 0.7857 | A |
| 3 | BICF2G630357032        | 90003245 | A | 0.25 | 0.2143 | C |

|   |                 |          |   |      |        |   |
|---|-----------------|----------|---|------|--------|---|
| 3 | BICF2G630357072 | 90019424 | G | 0.75 | 0.7857 | A |
| 3 | BICF2G630357081 | 90022114 | A | 0    | 0      | G |
| 3 | BICF2P1149848   | 90033614 | G | 0.25 | 0.2143 | A |
| 3 | BICF2G630357140 | 90047032 | G | 0    | 0      | A |
| 3 | BICF2G630357215 | 90067970 | A | 0.25 | 0.2857 | G |
| 3 | BICF2P736644    | 90070178 | A | 0.25 | 0.2857 | G |
| 3 | BICF2G630357248 | 90101416 | G | 0.5  | 0.5    | A |
| 3 | BICF2G630357260 | 90110643 | C | 0    | 0      | A |
| 3 | BICF2G630357274 | 90117965 | A | 0    | 0      | G |
| 3 | BICF2P1260487   | 90134431 | G | 0    | 0      | A |
| 3 | BICF2G630357299 | 90139314 | C | 0.25 | 0.2143 | A |
| 3 | BICF2S23032490  | 90148614 | A | 0    | 0      | C |
| 3 | BICF2G630357319 | 90160750 | G | 0.25 | 0.2857 | A |
| 3 | BICF2G630357334 | 90174919 | G | 0.75 | 0.7143 | A |
| 3 | BICF2G630357341 | 90180731 | A | 0.75 | 0.75   | G |
| 3 | BICF2P435419    | 90193262 | C | 0.25 | 0.2857 | A |
| 3 | BICF2S2309707   | 90194722 | A | 0.25 | 0.2857 | G |
| 3 | BICF2S23315277  | 90207859 | G | 0.75 | 0.7143 | A |
| 3 | BICF2S23315274  | 90208111 | A | 0    | 0      | G |
| 3 | BICF2G630357407 | 90219273 | G | 0.25 | 0.2143 | A |
| 3 | BICF2G630357414 | 90221599 | G | 0    | 0      | A |
| 3 | BICF2G630357432 | 90231702 | A | 0    | 0      | G |
| 3 | BICF2G630357442 | 90246482 | A | 0    | 0      | G |
| 3 | BICF2G630357452 | 90256404 | A | 0    | 0      | G |
| 3 | BICF2G630357458 | 90261236 | A | 0    | 0      | G |
| 3 | BICF2G630357472 | 90269479 | A | 0    | 0      | G |
| 3 | BICF2G630357488 | 90278825 | A | 0    | 0      | G |
| 3 | BICF2G630357515 | 90293285 | A | 0.25 | 0.2857 | G |
| 3 | BICF2G630357534 | 90298614 | A | 0.25 | 0.2857 | C |
| 3 | BICF2P1251270   | 90312715 | G | 0.25 | 0.2143 | A |
| 3 | BICF2G630357616 | 90328149 | G | 0.25 | 0.2143 | A |
| 3 | BICF2G630357625 | 90338160 | G | 0    | 0      | A |
| 3 | BICF2G630357647 | 90347514 | A | 0    | 0      | G |
| 3 | BICF2G630357710 | 90368989 | G | 0.75 | 0.7143 | A |
| 3 | BICF2G630357728 | 90381075 | G | 0    | 0      | A |
| 3 | BICF2G630357748 | 90397417 | A | 0.25 | 0.2857 | G |
| 3 | BICF2G630357768 | 90414435 | G | 0    | 0      | A |
| 3 | BICF2G630357780 | 90430513 | C | 0    | 0      | A |
| 3 | BICF2P725076    | 90445365 | 0 | 0    | 0      | C |
| 3 | BICF2P427640    | 90454862 | 0 | 0    | 0      | A |
| 3 | BICF2S2352275   | 90466189 | A | 0.25 | 0.2857 | G |
| 3 | BICF2P965985    | 90474124 | G | 0.25 | 0.2857 | A |
| 3 | BICF2S23720272  | 90489157 | A | 1    | 1      | G |
| 3 | BICF2P874738    | 90498112 | G | 0.25 | 0.2857 | A |
| 3 | BICF2P874739    | 90498565 | A | 0.25 | 0.2857 | G |
| 3 | BICF2S2337940   | 90525676 | A | 0    | 0      | G |
| 3 | BICF2S23336259  | 90530673 | A | 0    | 0      | G |

|   |                        |          |   |      |        |   |
|---|------------------------|----------|---|------|--------|---|
| 3 | BICF2G630357835        | 90563150 | A | 0.25 | 0.2857 | G |
| 3 | BICF2G630357849        | 90575284 | A | 0    | 0      | G |
| 3 | BICF2P856988           | 90587115 | G | 1    | 1      | A |
| 3 | BICF2P856987           | 90587396 | G | 1    | 1      | A |
| 3 | BICF2P263449           | 90588369 | G | 1    | 1      | A |
| 3 | BICF2G630357873        | 90601528 | A | 0    | 0      | G |
| 3 | TIGRP2P55710_rs9174112 | 90611300 | G | 0    | 0      | A |
| 3 | BICF2G630357890        | 90626083 | G | 0.25 | 0.2857 | A |
| 3 | TIGRP2P55718_rs8893256 | 90634191 | A | 0    | 0      | G |
| 3 | BICF2G630357943        | 90656425 | C | 0.25 | 0.2857 | A |
| 3 | BICF2P401637           | 90675531 | A | 0    | 0      | G |
| 3 | BICF2G630357966        | 90677333 | G | 0    | 0.1429 | A |
| 3 | BICF2G630357968        | 90679530 | A | 0    | 0      | G |
| 3 | BICF2G630357985        | 90693648 | C | 0.25 | 0.4286 | A |
| 3 | BICF2G630358035        | 90718802 | C | 0    | 0      | A |
| 3 | BICF2G630358046        | 90724165 | G | 1    | 0.8571 | A |
| 3 | BICF2G630358064        | 90742553 | C | 1    | 0.9167 | A |
| 3 | BICF2P866204           | 90757469 | G | 0    | 0      | A |
| 3 | BICF2G630358096        | 90767797 | A | 0    | 0.1429 | G |
| 3 | BICF2G630358118        | 90773840 | G | 0.75 | 0.6429 | A |
| 3 | BICF2S22912748         | 90787957 | C | 0    | 0.1429 | A |
| 3 | BICF2P793882           | 90799028 | C | 0    | 0      | A |
| 3 | BICF2G630358124        | 90807324 | A | 0    | 0      | C |
| 3 | BICF2G630358126        | 90817113 | G | 1    | 1      | A |
| 3 | BICF2P781352           | 90829889 | G | 0.25 | 0.3571 | A |
| 3 | BICF2S23220241         | 90832872 | A | 0    | 0      | G |
| 3 | BICF2G630358129        | 90842529 | A | 0.25 | 0.2143 | G |
| 3 | BICF2G630358140        | 90850009 | G | 0.75 | 0.7143 | A |
| 3 | BICF2G630358155        | 90861550 | G | 0.5  | 0.5    | A |
| 3 | BICF2G630358205        | 90876433 | A | 0    | 0      | G |
| 3 | BICF2G630358221        | 90885261 | A | 0.25 | 0.4286 | G |
| 3 | BICF2G630358225        | 90889366 | A | 0    | 0      | C |
| 3 | BICF2G630358244        | 90896109 | A | 0.25 | 0.2143 | G |
| 3 | BICF2G630358257        | 90906836 | A | 0.25 | 0.2143 | G |
| 3 | BICF2S23242114         | 90907197 | A | 0.25 | 0.2143 | C |
| 3 | BICF2G630358279        | 90915155 | A | 0    | 0      | G |
| 3 | BICF2G630358287        | 90919121 | C | 0.25 | 0.2143 | A |
| 3 | BICF2P217896           | 90922391 | G | 0.75 | 0.625  | A |
| 3 | BICF2G630358305        | 90933142 | A | 0    | 0      | G |
| 3 | BICF2S23221091         | 90953280 | A | 1    | 1      | C |
| 3 | BICF2G630358346        | 90954735 | A | 1    | 1      | G |
| 3 | TIGRP2P55830_rs9237785 | 90965971 | G | 0.25 | 0.2857 | A |
| 3 | BICF2P854814           | 90985609 | G | 1    | 0.8571 | A |
| 3 | BICF2G630358393        | 90987595 | A | 0    | 0      | C |
| 3 | BICF2G630358395        | 90988310 | G | 0    | 0.1429 | A |
| 3 | BICF2P552322           | 91006987 | G | 0.25 | 0.2857 | A |
| 3 | BICF2S23649843         | 91018500 | A | 0.25 | 0.4286 | G |



|   |                        |          |   |      |        |   |
|---|------------------------|----------|---|------|--------|---|
| 3 | BICF2P1298736          | 91031497 | G | 0.75 | 0.7857 | A |
| 3 | TIGRP2P55842_rs8846762 | 91037189 | A | 0    | 0      | G |
| 3 | TIGRP2P55856_rs9224139 | 91048832 | 0 | 0    | 0      | A |
| 3 | BICF2G630358448        | 91077800 | A | 0.5  | 0.5    | G |
| 3 | BICF2G630358465        | 91084659 | A | 0    | 0.1429 | G |
| 3 | BICF2G630358478        | 91087300 | A | 0    | 0.1429 | C |
| 3 | BICF2G630358491        | 91093319 | A | 0    | 0.1429 | G |
| 3 | BICF2P726237           | 91108125 | 0 | 0    | 0      | A |
| 3 | BICF2G630358500        | 91118478 | T | 0.25 | 0.2857 | A |
| 3 | BICF2S23348076         | 91133389 | G | 0    | 0.1429 | A |
| 3 | BICF2P1152859          | 91143858 | A | 0    | 0.1429 | G |
| 3 | TIGRP2P55888_rs9211220 | 91147591 | G | 0.5  | 0.5    | A |
| 3 | TIGRP2P55895_rs8565358 | 91159415 | T | 0    | 0.1429 | A |
| 3 | BICF2P213912           | 91161736 | C | 0    | 0.1429 | A |
| 3 | BICF2G630358507        | 91180492 | G | 0.25 | 0.2143 | A |
| 3 | BICF2G630358512        | 91185426 | A | 0.75 | 0.7857 | G |
| 3 | TIGRP2P55899_rs8955313 | 91198889 | C | 0.5  | 0.3571 | G |
| 3 | BICF2G630358530        | 91201876 | A | 0.25 | 0.3571 | C |
| 3 | BICF2G630358534        | 91203501 | A | 0.25 | 0.2857 | T |
| 3 | BICF2P192508           | 91209284 | G | 0.5  | 0.3571 | A |
| 3 | BICF2P1329392          | 91219743 | G | 0.5  | 0.3571 | A |
| 3 | BICF2G630358589        | 91233444 | A | 0.25 | 0.3571 | T |
| 3 | BICF2G630358611        | 91247771 | A | 0    | 0      | G |
| 3 | BICF2G630358638        | 91255099 | A | 1    | 1      | C |
| 3 | TIGRP2P55933_rs8767797 | 91273897 | A | 0.25 | 0.3    | G |
| 3 | BICF2S23120051         | 91284844 | A | 0.5  | 0.3571 | G |
| 3 | BICF2P391939           | 91289839 | 0 | 0    | 0      | A |
| 3 | BICF2S23520428         | 91304682 | G | 0    | 0      | A |
| 3 | BICF2G630358640        | 91314456 | G | 0.25 | 0.3571 | C |
| 3 | BICF2S23142281         | 91324432 | 0 | 0    | 0      | G |
| 3 | BICF2P461483           | 91336346 | 0 | 0    | 0      | A |
| 3 | BICF2G630358684        | 91365888 | G | 0.5  | 0.3571 | A |
| 3 | BICF2G630358687        | 91369267 | C | 0.5  | 0.3333 | A |
| 3 | BICF2G630358690        | 91369800 | G | 0.5  | 0.3571 | C |
| 3 | BICF2G630358717        | 91380967 | C | 0.5  | 0.3571 | A |
| 3 | BICF2G630358738        | 91391177 | G | 0.5  | 0.5    | A |
| 3 | BICF2P903299           | 91402786 | A | 0.5  | 0.3571 | G |
| 3 | BICF2G630358788        | 91406506 | G | 0    | 0.1429 | A |
| 3 | BICF2G630358801        | 91418066 | A | 0    | 0      | G |
| 3 | BICF2G630358827        | 91433824 | A | 0.5  | 0.3571 | G |
| 3 | BICF2G630358846        | 91438673 | A | 1    | 0.8571 | G |
| 3 | BICF2G630358864        | 91456583 | G | 0    | 0      | A |
| 3 | BICF2G630358871        | 91468680 | A | 0    | 0      | G |
| 3 | BICF2P528180           | 91471138 | A | 0    | 0.1429 | G |
| 3 | BICF2P1141218          | 91487767 | G | 0    | 0.1429 | A |
| 3 | BICF2P1282453          | 91493748 | A | 0    | 0.1429 | G |
| 3 | BICF2G630358907        | 91494413 | A | 0    | 0      | G |

|   |                        |          |   |     |        |   |
|---|------------------------|----------|---|-----|--------|---|
| 3 | BICF2P235747           | 91511643 | A | 0   | 0.1429 | G |
| 3 | BICF2G630358959        | 91518210 | A | 0   | 0      | C |
| 3 | BICF2P1145732          | 91537696 | T | 0   | 0.2857 | A |
| 3 | BICF2G630359000        | 91539418 | G | 0.5 | 0.3571 | A |
| 3 | TIGRP2P56000_rs8602529 | 91549042 | A | 0   | 0.1429 | C |
| 3 | BICF2G630359015        | 91553711 | G | 0   | 0      | A |
| 3 | BICF2S23159307         | 91557582 | G | 0.5 | 0.3571 | A |
| 3 | BICF2G630359046        | 91571695 | A | 0.5 | 0.3571 | G |
| 3 | BICF2G630359047        | 91571825 | G | 0   | 0      | A |
| 3 | BICF2G630359066        | 91582955 | A | 0   | 0      | C |
| 3 | BICF2P1156603          | 91594342 | A | 0.5 | 0.3571 | G |
| 3 | BICF2G630359092        | 91595106 | G | 0.5 | 0.3571 | A |
| 3 | BICF2G630359107        | 91600495 | A | 0.5 | 0.3571 | G |
| 3 | BICF2S23646464         | 91609883 | A | 0.5 | 0.2143 | C |
| 3 | BICF2P1282800          | 91629817 | A | 0   | 0.2857 | G |
| 3 | TIGRP2P56017_rs8890666 | 91632249 | 0 | 0   | 0      | A |
| 3 | BICF2P1435943          | 91647652 | C | 1   | 0.8571 | G |
| 3 | TIGRP2P56046_rs9039529 | 91661684 | 0 | 0   | 0      | A |
| 3 | BICF2G630359132        | 91666827 | A | 0   | 0      | G |
| 3 | BICF2G630359134        | 91678586 | A | 1   | 0.5714 | G |
| 3 | BICF2G630359182        | 91692951 | A | 0.5 | 0.5    | G |
| 3 | BICF2S23653217         | 91701153 | A | 0.5 | 0.3571 | G |
| 3 | BICF2G630359186        | 91721437 | C | 0   | 0.1429 | A |
| 3 | BICF2P1097236          | 91721974 | A | 0.5 | 0.2143 | G |
| 3 | BICF2S23539373         | 91724378 | A | 0   | 0      | C |
| 3 | BICF2P310706           | 91740607 | A | 0   | 0.1429 | C |
| 3 | BICF2S2346160          | 91747119 | A | 0   | 0      | G |
| 3 | BICF2G630359233        | 91764521 | G | 0   | 0      | A |
| 3 | BICF2G630359242        | 91770049 | A | 0.5 | 0.2143 | G |
| 3 | BICF2P280649           | 91785257 | A | 0   | 0.4286 | T |
| 3 | BICF2P280650           | 91785665 | A | 0   | 0.4286 | G |
| 3 | BICF2G630359277        | 91802222 | A | 0   | 0      | G |
| 3 | BICF2S22920827         | 91804817 | C | 0   | 0      | A |
| 3 | BICF2G630359334        | 91816766 | G | 0.5 | 0.2143 | A |
| 3 | BICF2G630359356        | 91829514 | G | 0.5 | 0.3571 | A |
| 3 | BICF2S23657159         | 91849499 | G | 1   | 0.5714 | A |
| 3 | BICF2G630359393        | 91849783 | G | 1   | 0.8571 | A |
| 3 | BICF2G630359424        | 91867282 | G | 0   | 0      | A |
| 3 | BICF2G630359433        | 91875286 | A | 0.5 | 0.6429 | G |
| 3 | BICF2G630359448        | 91890729 | G | 1   | 0.8571 | A |
| 3 | BICF2G630359454        | 91900153 | C | 1   | 0.8571 | A |
| 3 | BICF2P12045            | 91909053 | G | 0   | 0      | A |
| 3 | BICF2G630359478        | 91923091 | G | 0.5 | 0.2143 | A |
| 3 | BICF2G630359488        | 91933300 | G | 0.5 | 0.3571 | C |
| 3 | BICF2S22956632         | 91939525 | A | 1   | 0.5714 | G |
| 3 | BICF2G630359517        | 91944314 | A | 0   | 0      | C |
| 3 | BICF2G630359539        | 91954471 | G | 1   | 0.8571 | A |

|   |                        |          |   |     |         |   |
|---|------------------------|----------|---|-----|---------|---|
| 3 | BICF2P1405503          | 91965542 | A | 0   | 0.1429  | G |
| 3 | BICF2G630359593        | 91972805 | A | 1   | 0.8571  | G |
| 3 | BICF2G630359611        | 91979851 | G | 0   | 0.1429  | A |
| 3 | BICF2G630359629        | 91995750 | C | 1   | 0.5714  | A |
| 3 | BICF2P204702           | 92007286 | A | 1   | 0.9167  | G |
| 3 | BICF2G630359661        | 92016374 | T | 0   | 0       | A |
| 3 | BICF2G630359688        | 92023901 | A | 0   | 0.2857  | G |
| 3 | TIGRP2P56189_rs9051831 | 92038947 | A | 0.5 | 0.2143  | C |
| 3 | BICF2G630359740        | 92046482 | A | 0   | 0       | G |
| 3 | BICF2G630359785        | 92060036 | G | 0.5 | 0.2143  | A |
| 3 | BICF2G630359806        | 92076801 | A | 0.5 | 0.2143  | G |
| 3 | BICF2G630359825        | 92083794 | A | 0   | 0.1429  | C |
| 3 | BICF2G630359853        | 92093703 | A | 0.5 | 0.2143  | G |
| 3 | TIGRP2P56199_rs8868169 | 92105769 | 0 | 0   | 0       | C |
| 3 | BICF2P1331792          | 92118498 | G | 0.5 | 0.2143  | A |
| 3 | BICF2G630359866        | 92129218 | A | 0   | 0.2857  | C |
| 3 | BICF2G630359877        | 92142778 | G | 1   | 0.8571  | A |
| 3 | BICF2P300068           | 92157207 | G | 0   | 0       | A |
| 3 | BICF2G630359898        | 92163860 | A | 1   | 0.9167  | C |
| 3 | BICF2G630359917        | 92173779 | A | 0   | 0.1429  | G |
| 3 | BICF2G630359938        | 92186454 | G | 0   | 0       | A |
| 3 | BICF2G630359951        | 92196460 | A | 0   | 0       | C |
| 3 | BICF2G630359981        | 92207326 | G | 0   | 0       | A |
| 3 | BICF2G630360010        | 92223569 | G | 0.5 | 0.5     | A |
| 3 | BICF2G630360016        | 92225694 | A | 0.5 | 0.3571  | G |
| 3 | BICF2G630360036        | 92230594 | A | 0.5 | 0.5     | C |
| 3 | BICF2G630360054        | 92247429 | A | 0   | 0       | C |
| 3 | BICF2G630360062        | 92259782 | G | 0.5 | 0.3571  | A |
| 3 | BICF2G630360067        | 92266056 | G | 0.5 | 0.3571  | A |
| 3 | BICF2G630360106        | 92279131 | A | 0   | 0       | C |
| 3 | BICF2G630360159        | 92295134 | G | 0   | 0       | A |
| 3 | BICF2G630360179        | 92304010 | A | 0   | 0       | G |
| 3 | TIGRP2P56266_rs9151482 | 92314560 | A | 0   | 0       | G |
| 3 | BICF2G630360211        | 92325351 | C | 0   | 0.2857  | A |
| 3 | TIGRP2P56271_rs8992400 | 92337946 | A | 0.5 | 0.7857  | G |
| 3 | BICF2S2341832          | 92351729 | A | 0   | 0.08333 | C |
| 3 | BICF2P606039           | 92357499 | A | 0.5 | 0.2143  | G |
| 3 | BICF2S23033256         | 92370635 | G | 0   | 0       | A |
| 3 | BICF2G630360225        | 92386749 | A | 0   | 0       | G |
| 3 | BICF2P862964           | 92402043 | G | 0   | 0.4286  | A |
| 3 | BICF2P964095           | 92411287 | C | 0.5 | 0.2143  | G |
| 3 | BICF2G630360248        | 92417378 | G | 0   | 0       | A |
| 3 | BICF2G630360272        | 92429580 | G | 0   | 0       | A |
| 3 | BICF2G630360278        | 92434850 | A | 0   | 0       | G |
| 3 | BICF2P1444829          | 92444609 | 0 | 0   | 0       | A |
| 3 | BICF2G630360282        | 92454874 | G | 0   | 0       | A |
| 3 | BICF2P238409           | 92463582 | A | 0.5 | 0.3571  | G |

|   |                        |          |   |     |        |   |
|---|------------------------|----------|---|-----|--------|---|
| 3 | BICF2G630360306        | 92476123 | A | 0.5 | 0.3571 | C |
| 3 | BICF2G630360326        | 92487972 | A | 1   | 0.5714 | G |
| 3 | TIGRP2P56296_rs8626443 | 92497811 | A | 1   | 0.7143 | G |
| 3 | BICF2S2337748          | 92527005 | G | 0   | 0      | A |
| 3 | BICF2G630360337        | 92529071 | 0 | 0   | 0      | G |
| 3 | BICF2P94972            | 92551164 | G | 0   | 0      | A |
| 3 | TIGRP2P56300_rs8682212 | 92555190 | A | 0   | 0      | G |
| 3 | BICF2P577230           | 92569486 | G | 0.5 | 0.3571 | A |
| 3 | BICF2P573054           | 92584140 | G | 1   | 0.5714 | A |
| 3 | BICF2P559214           | 92592289 | 0 | 0   | 0      | G |
| 3 | TIGRP2P56325_rs8972094 | 92600209 | G | 1   | 0.5714 | A |
| 3 | BICF2P305365           | 92611988 | A | 0   | 0      | C |
| 3 | BICF2P462755           | 92618508 | A | 0.5 | 0.3571 | G |
| 3 | BICF2P178641           | 92632104 | G | 1   | 0.8571 | A |
| 3 | BICF2S23310557         | 92639431 | A | 0   | 0.2857 | G |
| 3 | BICF2S2326451          | 92656899 | A | 0.5 | 0.5    | G |
| 3 | BICF2G630360341        | 92669263 | G | 0   | 0.1429 | A |
| 3 | BICF2G630360352        | 92679280 | A | 0   | 0.4286 | C |
| 3 | BICF2G630360392        | 92696042 | G | 1   | 0.7143 | A |
| 3 | TIGRP2P56360_rs8991444 | 92704755 | A | 0   | 0      | G |
| 3 | BICF2S22958394         | 92714412 | G | 0.5 | 0.3571 | A |
| 3 | BICF2G630360421        | 92730902 | A | 0.5 | 0.3571 | T |
| 3 | BICF2P736282           | 92737264 | 0 | 0   | 0      | G |
| 3 | BICF2G630360437        | 92758002 | A | 1   | 0.8571 | G |
| 3 | BICF2G630360440        | 92762689 | A | 0.5 | 0.8333 | C |
| 3 | BICF2P1085907          | 92771518 | A | 0.5 | 0.7857 | G |
| 3 | BICF2G630360460        | 92782126 | G | 0.5 | 0.6429 | A |
| 3 | BICF2P440167           | 92801379 | T | 0   | 0.2857 | A |
| 3 | BICF2G630360498        | 92814113 | A | 0.5 | 0.6429 | C |
| 3 | BICF2P965800           | 92818162 | A | 0   | 0.2857 | C |
| 3 | BICF2P1433471          | 92844742 | 0 | 0   | 0      | G |
| 3 | BICF2G630360527        | 92861353 | G | 0.5 | 0.3571 | A |
| 3 | BICF2G630360540        | 92864088 | A | 0.5 | 0.3571 | G |
| 3 | BICF2G630360558        | 92876102 | A | 0.5 | 0.3571 | G |
| 3 | BICF2G630360569        | 92888906 | A | 0.5 | 0.2143 | G |
| 3 | BICF2G630360596        | 92898131 | G | 0.5 | 0.3571 | A |
| 3 | BICF2G630360626        | 92918288 | A | 0.5 | 0.3571 | G |
| 3 | BICF2G630360632        | 92920698 | A | 0.5 | 0.2143 | G |
| 3 | BICF2S22910940         | 92934377 | A | 1   | 0.5714 | G |
| 3 | BICF2G630360637        | 92948610 | A | 0   | 0      | G |
| 3 | BICF2P971218           | 92959822 | A | 1   | 0.8571 | G |
| 3 | BICF2P1000952          | 92968134 | A | 0   | 0      | G |
| 3 | BICF2S23434560         | 92979889 | A | 0   | 0.1429 | G |
| 3 | BICF2S2299695          | 92997196 | A | 0   | 0.4286 | G |
| 3 | BICF2G630360651        | 93002840 | G | 1   | 0.8571 | A |
| 3 | BICF2G630360662        | 93015509 | A | 0   | 0.2857 | C |
| 3 | BICF2G630360692        | 93026056 | 0 | 0   | 0      | G |

|   |                        |          |   |     |        |   |
|---|------------------------|----------|---|-----|--------|---|
| 3 | BICF2G630360725        | 93036963 | G | 0   | 0      | C |
| 3 | BICF2G630360750        | 93049536 | A | 1   | 0.8571 | T |
| 3 | TIGRP2P56461_rs8795035 | 93068421 | A | 0   | 0      | C |
| 3 | BICF2P1383106          | 93069666 | T | 0   | 0      | A |
| 3 | BICF2G630360758        | 93083109 | A | 0   | 0      | G |
| 3 | BICF2G630360771        | 93106600 | G | 0.5 | 0.3571 | A |
| 3 | TIGRP2P56495_rs9206866 | 93106827 | G | 0   | 0      | A |
| 3 | BICF2P285489           | 93118976 | A | 0   | 0      | G |
| 3 | BICF2S2334899          | 93136680 | G | 0   | 0.1429 | A |
| 3 | BICF2G630360777        | 93141486 | A | 0   | 0      | T |
| 3 | BICF2G630360807        | 93158328 | 0 | 0   | 0      | G |
| 3 | BICF2S23020837         | 93175173 | 0 | 0   | 0      | A |
| 3 | BICF2G630360814        | 93190144 | G | 0   | 0      | A |
| 3 | BICF2P1334353          | 93207105 | C | 0   | 0.2857 | A |
| 3 | TIGRP2P56508_rs9191466 | 93209970 | G | 0   | 0.2857 | A |
| 3 | TIGRP2P56519_rs8959077 | 93226945 | C | 0   | 0      | A |
| 3 | BICF2G630360841        | 93232560 | G | 0   | 0      | A |
| 3 | BICF2G630360899        | 93252748 | A | 0   | 0.1429 | G |
| 3 | BICF2G630360917        | 93261593 | A | 0.5 | 0.7857 | G |
| 3 | BICF2G630360921        | 93266933 | A | 0.5 | 0.3571 | G |
| 3 | BICF2P547826           | 93287324 | G | 0   | 0.1429 | A |
| 3 | BICF2G630360965        | 93288970 | G | 0   | 0      | A |
| 3 | BICF2P985903           | 93300498 | C | 0   | 0.1429 | G |
| 3 | BICF2G630360986        | 93302632 | T | 1   | 0.8571 | A |
| 3 | TIGRP2P56526_rs8841319 | 93315941 | 0 | 0   | 0      | G |
| 3 | BICF2P1442524          | 93323292 | A | 0   | 0      | C |
| 3 | BICF2G630361025        | 93334344 | G | 0   | 0      | A |
| 3 | BICF2G630361060        | 93351298 | C | 0   | 0      | A |
| 3 | BICF2P1316299          | 93359777 | G | 0   | 0      | A |
| 3 | BICF2P1400721          | 93364570 | A | 0   | 0      | C |
| 3 | BICF2G630361118        | 93373458 | A | 0   | 0      | G |
| 3 | BICF2G630361156        | 93388160 | G | 0   | 0      | C |
| 3 | BICF2G630361183        | 93397800 | G | 0.5 | 0.2143 | A |
| 3 | BICF2P1386355          | 93408534 | A | 0   | 0      | G |
| 3 | BICF2G630361219        | 93415696 | G | 0   | 0      | A |
| 3 | BICF2P486742           | 93432486 | A | 0.5 | 0.7857 | G |
| 3 | BICF2P616077           | 93435448 | A | 0.5 | 0.6429 | C |
| 3 | BICF2G630361240        | 93443600 | G | 0.5 | 0.3571 | A |
| 3 | TIGRP2P56552_rs8783692 | 93449255 | A | 0.5 | 0.3571 | C |
| 3 | BICF2G630361250        | 93453951 | A | 0.5 | 0.2143 | G |
| 3 | BICF2S23739949         | 93458125 | G | 0   | 0      | A |
| 3 | BICF2P736579           | 93468384 | G | 0.5 | 0.3571 | A |
| 3 | BICF2P1034616          | 93478160 | G | 1   | 1      | A |
| 3 | BICF2S23140592         | 93490378 | A | 0   | 0      | G |
| 3 | BICF2P1336605          | 93496113 | A | 0   | 0      | G |
| 3 | BICF2S23320812         | 93520425 | C | 0   | 0.4286 | A |
| 3 | TIGRP2P56604_rs8738045 | 93539230 | G | 0   | 0      | A |

|   |                        |          |   |      |        |   |
|---|------------------------|----------|---|------|--------|---|
| 3 | BICF2P1090735          | 93542118 | A | 0    | 0      | G |
| 3 | BICF2S23630742         | 93554654 | A | 0.5  | 0.3571 | C |
| 3 | BICF2S23658912         | 93572732 | A | 0    | 0      | G |
| 3 | TIGRP2P56631_rs9248872 | 93576449 | C | 0    | 0      | A |
| 3 | TIGRP2P56632_rs8586189 | 93594808 | A | 0.5  | 0.7857 | G |
| 3 | BICF2P186901           | 93609499 | 0 | 0    | 0      | G |
| 3 | BICF2P186904           | 93610097 | G | 0.5  | 0.2143 | C |
| 3 | BICF2P16210            | 93618479 | C | 0.5  | 0.7857 | G |
| 3 | TIGRP2P56654_rs9051017 | 93622231 | A | 0    | 0      | G |
| 3 | BICF2P593795           | 93639445 | A | 0    | 0      | G |
| 3 | TIGRP2P56667_rs9213518 | 93654803 | A | 0    | 0      | G |
| 3 | BICF2P69321            | 93656112 | A | 0    | 0      | G |
| 3 | TIGRP2P56697_rs8554529 | 93668058 | G | 0    | 0      | A |
| 3 | BICF2G630361279        | 93684805 | A | 0    | 0      | G |
| 3 | BICF2G630361292        | 93697691 | A | 0.5  | 0.6429 | G |
| 3 | BICF2S23344409         | 93700678 | A | 0    | 0      | G |
| 3 | BICF2S23021180         | 93702157 | G | 0    | 0      | A |
| 3 | BICF2G630361358        | 93715699 | G | 0    | 0      | A |
| 3 | BICF2G630361390        | 93731523 | A | 0    | 0      | G |
| 3 | BICF2G630361402        | 93737251 | A | 0    | 0      | G |
| 3 | TIGRP2P56753_rs8687916 | 93757480 | A | 0.75 | 0.7857 | C |
| 3 | BICF2G630361429        | 93759842 | G | 0.75 | 0.7857 | A |
| 3 | BICF2G630361447        | 93771750 | A | 1    | 1      | G |
| 3 | TIGRP2P56757_rs8845596 | 93782961 | C | 0    | 0      | A |
| 3 | BICF2G630361486        | 93799182 | C | 0    | 0      | A |
| 3 | TIGRP2P56768_rs9180220 | 93815429 | A | 0.75 | 0.7143 | G |
| 3 | BICF2P157363           | 93815630 | T | 0    | 0      | A |
| 3 | BICF2G630361536        | 93826885 | T | 0    | 0      | A |
| 3 | BICF2G630361552        | 93848039 | A | 0    | 0      | G |
| 3 | BICF2P635494           | 93851186 | A | 0.5  | 0.6429 | G |
| 3 | BICF2G630361560        | 93855729 | A | 0    | 0      | G |
| 3 | BICF2G630361583        | 93864300 | G | 0.5  | 0.5    | A |
| 3 | BICF2G630361616        | 93878015 | G | 0.25 | 0.2857 | A |
| 3 | BICF2S2377250          | 93890772 | G | 0    | 0      | A |
| 3 | BICF2G630361659        | 93897764 | A | 0    | 0      | G |
| 3 | BICF2G630361674        | 93914980 | G | 0.5  | 0.5    | A |
| 3 | BICF2G630361693        | 93927492 | A | 0.25 | 0.3571 | G |
| 3 | TIGRP2P56799_rs8666557 | 93933450 | A | 0.25 | 0.2857 | C |
| 3 | BICF2G630361702        | 93944095 | A | 0    | 0      | G |
| 3 | TIGRP2P56825_rs9063147 | 93955329 | G | 0.25 | 0.2857 | A |
| 3 | BICF2G630361725        | 93970062 | A | 0.25 | 0.2857 | C |
| 3 | BICF2G630361729        | 93988514 | T | 0.25 | 0.2857 | A |
| 3 | BICF2G630361732        | 93996489 | T | 0.25 | 0.2857 | A |
| 3 | BICF2G630361734        | 94008502 | C | 0.25 | 0.4286 | A |
| 3 | BICF2G630361736        | 94014134 | G | 0    | 0      | A |
| 3 | BICF2G630361738        | 94025739 | A | 0.25 | 0.2857 | G |
| 3 | BICF2G630361742        | 94035855 | C | 0.25 | 0.2857 | A |

|   |                        |          |   |      |        |   |
|---|------------------------|----------|---|------|--------|---|
| 3 | BICF2G630361752        | 94075783 | G | 0.25 | 0.2857 | A |
| 3 | BICF2G630361761        | 94088224 | A | 0.25 | 0.2857 | G |
| 3 | BICF2S23417660         | 94098516 | A | 0    | 0      | G |
| 3 | BICF2G630361774        | 94112168 | A | 0    | 0      | G |
| 3 | BICF2P120209           | 94119812 | 0 | 0    | 0      | G |
| 3 | BICF2G630361777        | 94129590 | G | 0    | 0      | A |
| 3 | BICF2G630361781        | 94145159 | A | 0    | 0      | T |
| 3 | BICF2G630361787        | 94159014 | G | 0.25 | 0.3571 | A |
| 3 | BICF2G630361800        | 94163416 | C | 0.25 | 0.3571 | A |
| 3 | BICF2G630361819        | 94183739 | A | 0    | 0.1429 | G |
| 3 | BICF2S2302098          | 94186764 | G | 0    | 0.1429 | A |
| 3 | BICF2G630361830        | 94202201 | C | 0    | 0      | A |
| 3 | BICF2P1456918          | 94211980 | A | 0    | 0.1429 | G |
| 3 | BICF2P981487           | 94221985 | A | 0    | 0      | G |
| 3 | BICF2G630361854        | 94234613 | C | 0    | 0      | G |
| 3 | BICF2P124515           | 94246515 | G | 1    | 1      | A |
| 3 | BICF2G630361863        | 94254918 | G | 0    | 0      | A |
| 3 | BICF2P1251013          | 94268480 | 0 | 0    | 0      | G |
| 3 | BICF2G630361892        | 94271352 | G | 0    | 0      | A |
| 3 | BICF2G630361903        | 94287447 | A | 0.25 | 0.2143 | G |
| 3 | BICF2P12847            | 94296622 | A | 0    | 0      | G |
| 3 | BICF2P1008504          | 94306027 | G | 0.75 | 0.7857 | A |
| 3 | BICF2P1240644          | 94321355 | A | 0    | 0      | G |
| 3 | BICF2P888349           | 94323625 | G | 0.25 | 0.3571 | A |
| 3 | BICF2P440396           | 94355737 | A | 0    | 0      | G |
| 3 | BICF2S23326367         | 94365026 | 0 | 0    | 0      | G |
| 3 | BICF2G630361929        | 94372069 | A | 0    | 0      | G |
| 3 | BICF2P570239           | 94389426 | A | 0.25 | 0.3571 | G |
| 3 | BICF2G630361953        | 94397805 | A | 0.75 | 0.6667 | G |
| 3 | BICF2G630361960        | 94410234 | G | 0.25 | 0.3571 | A |
| 3 | BICF2G630361962        | 94415960 | G | 1    | 1      | A |
| 3 | BICF2G630361968        | 94444210 | A | 0.75 | 0.6429 | G |
| 3 | BICF2G630361978        | 94451861 | A | 0    | 0      | G |
| 3 | BICF2S2323991          | 94469321 | A | 0    | 0      | G |
| 3 | BICF2G630362013        | 94476356 | G | 0.75 | 0.6429 | A |
| 3 | BICF2G630362025        | 94484373 | A | 0    | 0      | G |
| 3 | TIGRP2P56940_rs9188947 | 94503865 | 0 | 0    | 0      | G |
| 3 | TIGRP2P56941_rs9070076 | 94507527 | 0 | 0    | 0      | G |
| 3 | BICF2G630362033        | 94526955 | C | 0    | 0      | A |
| 3 | BICF2G630362037        | 94545445 | G | 0    | 0      | A |
| 3 | BICF2G630362040        | 94560609 | A | 0    | 0      | G |
| 3 | BICF2S23735867         | 94574810 | A | 0.25 | 0.2143 | G |
| 3 | BICF2G630362044        | 94578249 | A | 0    | 0      | G |
| 3 | BICF2G630362047        | 94588307 | A | 0    | 0      | G |
| 3 | BICF2G630362054        | 94607062 | A | 0    | 0      | G |
| 3 | BICF2G630362055        | 94622240 | A | 0.25 | 0.2143 | G |
| 3 | TIGRP2P56952_rs9077464 | 94641142 | 0 | 0    | 0      | C |

|   |                        |          |   |      |         |   |
|---|------------------------|----------|---|------|---------|---|
| 3 | BICF2G630362059        | 94659212 | G | 0    | 0       | A |
| 3 | BICF2G630362060        | 94668519 | A | 0.25 | 0.2143  | C |
| 3 | BICF2S22917226         | 94684238 | C | 0    | 0       | A |
| 3 | BICF2P1491488          | 94693816 | 0 | 0    | 0       | G |
| 5 | BICF2P1500181          | 3110350  | A | 0    | 0       | G |
| 5 | BICF2P56652            | 3125894  | A | 0    | 0       | G |
| 5 | BICF2P114876           | 3141134  | A | 0    | 0       | G |
| 5 | BICF2P1288014          | 3154438  | A | 0    | 0       | G |
| 5 | BICF2P475735           | 3167473  | A | 0    | 0       | G |
| 5 | BICF2P677323           | 3192752  | C | 0    | 0       | A |
| 5 | BICF2P675052           | 3206571  | G | 0    | 0       | A |
| 5 | TIGRP2P69198_rs8753444 | 3210199  | 0 | 0    | 0       | A |
| 5 | BICF2P778734           | 3222808  | G | 0    | 0.07143 | A |
| 5 | BICF2P1201924          | 3236960  | G | 0    | 0       | A |
| 5 | BICF2S23351408         | 3246631  | A | 0    | 0       | G |
| 5 | BICF2S2363087          | 3267089  | G | 1    | 0.7857  | A |
| 5 | BICF2S23145124         | 3288561  | A | 0    | 0       | G |
| 5 | BICF2S23144867         | 3292352  | A | 0    | 0.2857  | C |
| 5 | BICF2S23656250         | 3309063  | A | 0    | 0       | G |
| 5 | BICF2P1302176          | 3324711  | 0 | 0    | 0       | A |
| 5 | BICF2P255244           | 3349182  | 0 | 0    | 0       | A |
| 5 | BICF2P762227           | 3376802  | 0 | 0    | 0       | A |
| 5 | BICF2P1470603          | 3398537  | 0 | 0    | 0       | A |
| 5 | BICF2S23347568         | 3412417  | A | 0    | 0       | G |
| 5 | BICF2P1230843          | 3423976  | 0 | 0    | 0       | T |
| 5 | BICF2S23246910         | 3440799  | A | 0    | 0       | G |
| 5 | BICF2S23111744         | 3468623  | A | 0    | 0       | C |
| 5 | BICF2P1004508          | 3482952  | 0 | 0    | 0       | A |
| 5 | BICF2P878791           | 3489634  | 0 | 0    | 0       | A |
| 5 | TIGRP2P69200_rs8912367 | 3517064  | 0 | 0    | 0       | C |
| 5 | BICF2S23145981         | 3529758  | G | 0    | 0       | A |
| 5 | BICF2P781083           | 3532699  | 0 | 0    | 0       | A |
| 5 | BICF2P1299264          | 3551586  | A | 0    | 0       | G |
| 5 | BICF2S232682           | 3551748  | A | 0    | 0       | G |
| 5 | BICF2P1168178          | 3555046  | 0 | 0    | 0       | C |
| 5 | BICF2S23043641         | 3576014  | G | 0    | 0       | A |
| 5 | BICF2P68740            | 3582721  | A | 0    | 0       | G |
| 5 | BICF2P11220            | 3596243  | 0 | 0    | 0       | A |
| 5 | BICF2P1370280          | 3601062  | 0 | 0    | 0       | G |
| 5 | BICF2S23630240         | 3629824  | A | 0    | 0.2143  | G |
| 5 | BICF2S2378885          | 3639193  | A | 1    | 0.7857  | G |
| 5 | BICF2S23019493         | 3653290  | G | 1    | 0.75    | A |
| 5 | BICF2P1268945          | 3662168  | 0 | 0    | 0       | C |
| 5 | BICF2P399740           | 3690698  | 0 | 0    | 0       | G |
| 5 | BICF2P1334765          | 3722027  | A | 0    | 0       | G |
| 5 | TIGRP2P69203_rs8645766 | 3735899  | 0 | 0    | 0       | C |
| 5 | BICF2S23713946         | 3741194  | G | 0    | 0.2143  | A |



|   |                        |         |   |   |        |   |
|---|------------------------|---------|---|---|--------|---|
| 5 | TIGRP2P69205_rs8688773 | 3764172 | 0 | 0 | 0      | C |
| 5 | BICF2S23331034         | 3789372 | A | 0 | 0      | G |
| 5 | G320f26S259            | 3814438 | G | 0 | 0.2143 | A |
| 5 | BICF2S23654148         | 3838565 | A | 1 | 0.7857 | G |
| 5 | BICF2S23312738         | 3841187 | A | 0 | 0      | C |
| 5 | BICF2S23229412         | 3856781 | A | 0 | 0      | G |
| 5 | BICF2S23763724         | 3874176 | A | 0 | 0      | G |
| 5 | BICF2S23630569         | 3888762 | G | 0 | 0      | A |
| 5 | BICF2S23024940         | 3921483 | A | 0 | 0      | G |
| 5 | BICF2S23022533         | 3940307 | A | 0 | 0      | C |
| 5 | BICF2S23027795         | 3956713 | G | 0 | 0      | A |
| 5 | BICF2S23316443         | 3970728 | A | 0 | 0      | G |
| 5 | BICF2S23723731         | 3984647 | A | 0 | 0      | G |
| 5 | TIGRP2P69207_rs9190391 | 3993303 | 0 | 0 | 0      | C |
| 5 | BICF2S23018252         | 4005343 | A | 0 | 0      | G |
| 5 | BICF2P1368718          | 4020276 | G | 0 | 0      | A |
| 5 | BICF2P792591           | 4032314 | 0 | 0 | 0      | G |
| 5 | BICF2S23341594         | 4047398 | G | 0 | 0      | A |
| 5 | BICF2P392853           | 4062985 | 0 | 0 | 0      | A |
| 5 | BICF2S23225878         | 4073074 | A | 0 | 0.2143 | G |
| 5 | BICF2S23615788         | 4087919 | G | 0 | 0      | A |
| 5 | BICF2S23438379         | 4109201 | A | 0 | 0      | G |
| 5 | BICF2S2308288          | 4122702 | G | 0 | 0      | A |
| 5 | BICF2S23333242         | 4136210 | A | 0 | 0      | G |
| 5 | BICF2S23422195         | 4159669 | A | 0 | 0      | G |
| 5 | BICF2P117765           | 4168368 | A | 0 | 0      | C |
| 5 | BICF2S2459722          | 4195975 | G | 0 | 0      | A |
| 5 | TIGRP2P69209_rs8802587 | 4198535 | 0 | 0 | 0      | A |
| 5 | BICF2S2362618          | 4219765 | G | 0 | 0      | A |
| 5 | BICF2P524908           | 4221133 | 0 | 0 | 0      | C |
| 5 | BICF2S23325646         | 4242068 | A | 0 | 0      | G |
| 5 | BICF2P500511           | 4260995 | 0 | 0 | 0      | G |
| 5 | BICF2S2397964          | 4289863 | A | 0 | 0.2143 | G |
| 5 | BICF2S23313764         | 4304623 | G | 0 | 0      | A |
| 5 | BICF2S23127889         | 4314822 | A | 0 | 0      | G |
| 5 | BICF2P374835           | 4340964 | A | 0 | 0      | G |
| 5 | TIGRP2P69210_rs8950597 | 4355547 | 0 | 0 | 0      | G |
| 5 | G321f18S109            | 4359281 | A | 0 | 0      | G |
| 5 | BICF2P862384           | 4388522 | A | 0 | 0      | G |
| 5 | BICF2S23251062         | 4394285 | A | 0 | 0      | G |
| 5 | BICF2P656448           | 4423748 | A | 0 | 0      | G |
| 5 | BICF2P656450           | 4423865 | 0 | 0 | 0      | C |
| 5 | BICF2S23618216         | 4445761 | A | 0 | 0      | G |
| 5 | BICF2P1170793          | 4451358 | 0 | 0 | 0      | G |
| 5 | BICF2P886802           | 4477088 | A | 0 | 0      | G |
| 5 | BICF2P856824           | 4485926 | 0 | 0 | 0      | C |
| 5 | BICF2S23527029         | 4498273 | A | 0 | 0      | G |

|   |                        |         |   |   |        |   |
|---|------------------------|---------|---|---|--------|---|
| 5 | BICF2P196552           | 4518164 | 0 | 0 | 0      | A |
| 5 | BICF2S23140940         | 4528783 | A | 0 | 0      | G |
| 5 | BICF2S2379205          | 4558780 | C | 0 | 0.2143 | A |
| 5 | BICF2P742243           | 4571811 | A | 0 | 0      | G |
| 5 | BICF2P1266529          | 4593592 | 0 | 0 | 0      | C |
| 5 | BICF2P1368700          | 4600369 | 0 | 0 | 0      | G |
| 5 | BICF2P334147           | 4620374 | 0 | 0 | 0      | A |
| 5 | BICF2P1041087          | 4649433 | 0 | 0 | 0      | A |
| 5 | BICF2S23347253         | 4664452 | A | 0 | 0.5    | G |
| 5 | BICF2P179815           | 4685577 | 0 | 0 | 0      | A |
| 5 | BICF2S23056544         | 4697408 | G | 0 | 0.5    | A |
| 5 | G322f34S191            | 4728376 | C | 0 | 0.5    | A |
| 5 | BICF2S23418659         | 4781523 | G | 0 | 0.2143 | A |
| 5 | BICF2S2345424          | 4790781 | G | 0 | 0.2143 | A |
| 5 | BICF2S23537022         | 4796153 | G | 0 | 0.1667 | A |
| 5 | BICF2S23714765         | 4812737 | A | 0 | 0      | C |
| 5 | BICF2S2441187          | 4830522 | A | 0 | 0.1667 | G |
| 5 | BICF2P1195895          | 4850514 | 0 | 0 | 0      | G |
| 5 | BICF2S23061033         | 4874678 | A | 0 | 0      | C |
| 5 | BICF2S23617519         | 4890275 | A | 0 | 0      | G |
| 5 | BICF2S23531185         | 4910141 | A | 0 | 0.2143 | G |
| 5 | TIGRP2P69220_rs9087523 | 4912769 | 0 | 0 | 0      | C |
| 5 | BICF2P768596           | 4927198 | 0 | 0 | 0      | A |
| 5 | BICF2S23233354         | 4943609 | A | 0 | 0      | G |
| 5 | BICF2S23427325         | 4959605 | G | 0 | 0      | A |
| 5 | BICF2S23752195         | 4979116 | A | 0 | 0      | G |
| 5 | BICF2S23736883         | 4995639 | A | 0 | 0.2857 | G |
| 5 | BICF2P1298577          | 5003186 | A | 0 | 0      | C |
| 5 | BICF2P954875           | 5022265 | A | 0 | 0      | G |
| 5 | BICF2S23121225         | 5036566 | A | 1 | 0.5    | G |
| 5 | BICF2P1219699          | 5053170 | A | 0 | 0      | G |
| 5 | BICF2P287339           | 5061258 | G | 0 | 0      | A |
| 5 | BICF2P1140415          | 5080128 | C | 0 | 0      | G |
| 5 | BICF2S23323013         | 5081598 | A | 0 | 0      | G |
| 5 | BICF2P1114742          | 5092933 | A | 0 | 0      | C |
| 5 | BICF2P1238072          | 5096384 | G | 0 | 0.2143 | A |
| 5 | BICF2P96458            | 5109464 | A | 0 | 0      | G |
| 5 | BICF2P96460            | 5109887 | A | 0 | 0.1667 | G |
| 5 | BICF2P818281           | 5116564 | A | 0 | 0      | G |
| 5 | BICF2P818283           | 5117883 | G | 0 | 0.2143 | A |
| 5 | BICF2P1056586          | 5132750 | G | 0 | 0      | A |
| 5 | BICF2P302891           | 5141847 | A | 0 | 0.2143 | G |
| 5 | BICF2P1019023          | 5160498 | G | 0 | 0.2143 | A |
| 5 | BICF2P1209432          | 5164730 | G | 0 | 0      | A |
| 5 | BICF2P262272           | 5182010 | C | 0 | 0.2143 | A |
| 5 | BICF2P708831           | 5183984 | G | 0 | 0.2143 | A |
| 5 | BICF2P520838           | 5192454 | G | 0 | 0.2143 | A |

|   |                |         |   |     |        |   |
|---|----------------|---------|---|-----|--------|---|
| 5 | BICF2P782395   | 5200504 | A | 0   | 0      | C |
| 5 | BICF2P567634   | 5220300 | G | 0   | 0.2143 | A |
| 5 | BICF2P201270   | 5227328 | 0 | 0   | 0      | A |
| 5 | BICF2P908011   | 5239342 | G | 0   | 0.125  | A |
| 5 | BICF2P1457733  | 5245724 | G | 0   | 0      | A |
| 5 | BICF2S23245588 | 5262874 | G | 0   | 0.2143 | A |
| 5 | BICF2P735121   | 5265124 | A | 0   | 0.2143 | G |
| 5 | BICF2P527923   | 5268134 | A | 0   | 0.2143 | G |
| 5 | BICF2P978257   | 5289248 | A | 0   | 0.2143 | G |
| 5 | BICF2P192233   | 5291944 | 0 | 0   | 0      | A |
| 5 | BICF2P443580   | 5301973 | A | 0.5 | 0.5714 | G |
| 5 | BICF2P1183273  | 5321680 | 0 | 0   | 0      | G |
| 5 | BICF2P913682   | 5323685 | A | 0.5 | 0.7857 | C |
| 5 | BICF2P1171838  | 5325494 | A | 0   | 0      | G |
| 5 | BICF2S23311911 | 5337103 | A | 1   | 1      | G |
| 5 | BICF2P270770   | 5356257 | G | 0.5 | 0.7857 | A |
| 5 | BICF2P29644    | 5362514 | G | 0.5 | 0.5833 | A |
| 5 | BICF2P617470   | 5371348 | 0 | 0   | 0      | A |
| 5 | BICF2P275101   | 5385868 | 0 | 0   | 0      | G |
| 5 | BICF2P274313   | 5395196 | G | 0.5 | 0.7857 | A |
| 5 | BICF2P40584    | 5410299 | A | 0.5 | 0.7857 | C |
| 5 | BICF2P950563   | 5419410 | T | 0.5 | 0.5714 | A |
| 5 | BICF2P1146050  | 5430745 | A | 0.5 | 0.5714 | G |
| 5 | BICF2P663601   | 5445283 | A | 0.5 | 0.7857 | G |
| 5 | BICF2P962049   | 5451580 | G | 0.5 | 0.7857 | A |
| 5 | BICF2P450265   | 5471532 | 0 | 0   | 0      | A |
| 5 | BICF2P876078   | 5481390 | A | 0.5 | 0.7857 | C |
| 5 | BICF2P283157   | 5489168 | C | 0.5 | 0.7857 | G |
| 5 | BICF2P593671   | 5498902 | A | 0   | 0      | G |
| 5 | BICF2P966369   | 5520845 | A | 0   | 0.1    | G |
| 5 | BICF2P658310   | 5535341 | G | 0   | 0      | A |
| 5 | BICF2P1405369  | 5543739 | C | 0   | 0      | A |
| 5 | BICF2P164675   | 5556488 | G | 0   | 0.2143 | A |
| 5 | BICF2S23346904 | 5570196 | G | 0   | 0      | A |
| 5 | BICF2P854713   | 5583551 | A | 0   | 0      | G |
| 5 | BICF2P1273243  | 5594800 | G | 0.5 | 0.5714 | A |
| 5 | BICF2P936669   | 5600355 | G | 0.5 | 0.5714 | A |
| 5 | BICF2P409122   | 5607836 | G | 0.5 | 0.5714 | A |
| 5 | BICF2P338231   | 5618069 | G | 0.5 | 0.5714 | A |
| 5 | BICF2P1359807  | 5628417 | G | 0.5 | 0.5714 | A |
| 5 | BICF2P410802   | 5636733 | G | 0.5 | 0.5714 | A |
| 5 | BICF2S23729849 | 5648607 | G | 0   | 0.2143 | A |
| 5 | BICF2P1076530  | 5665939 | A | 0.5 | 0.5714 | G |
| 5 | BICF2P763240   | 5673924 | C | 0.5 | 0.5714 | A |
| 5 | BICF2P802518   | 5681566 | A | 0.5 | 0.5714 | G |
| 5 | BICF2P760534   | 5692818 | G | 0.5 | 0.5714 | C |
| 5 | BICF2S23217065 | 5699287 | G | 0.5 | 0.5714 | A |

|   |                        |         |   |     |        |   |
|---|------------------------|---------|---|-----|--------|---|
| 5 | BICF2P813213           | 5705199 | A | 0.5 | 0.5714 | G |
| 5 | BICF2S2342356          | 5717604 | A | 0   | 0      | G |
| 5 | BICF2S22951057         | 5737390 | 0 | 0   | 0      | A |
| 5 | BICF2P462619           | 5739133 | A | 0.5 | 0.5714 | G |
| 5 | BICF2P349906           | 5748505 | A | 0.5 | 0.7857 | G |
| 5 | BICF2P547074           | 5753687 | A | 0.5 | 0.7857 | C |
| 5 | BICF2P137781           | 5772954 | G | 0.5 | 0.7857 | A |
| 5 | BICF2S23764501         | 5783703 | A | 0.5 | 0.7857 | G |
| 5 | BICF2S2331712          | 5789074 | A | 0.5 | 0.7857 | G |
| 5 | BICF2S23041361         | 5799854 | G | 0   | 0      | A |
| 5 | BICF2P275085           | 5810731 | G | 0   | 0      | A |
| 5 | BICF2S23061625         | 5825871 | A | 0.5 | 0.5714 | G |
| 5 | BICF2P669852           | 5833032 | A | 0.5 | 0.5714 | G |
| 5 | BICF2P565692           | 5846112 | A | 0   | 0      | G |
| 5 | BICF2P422273           | 5854248 | A | 0   | 0      | G |
| 5 | BICF2P1224352          | 5873621 | G | 0.5 | 0.5714 | A |
| 5 | BICF2P1049948          | 5879846 | A | 0   | 0      | C |
| 5 | BICF2P27137            | 5891169 | A | 0   | 0      | G |
| 5 | BICF2S23130444         | 5900427 | G | 0.5 | 0.5714 | A |
| 5 | BICF2P1267468          | 5921480 | A | 0   | 0      | G |
| 5 | BICF2S23311427         | 5932893 | G | 0.5 | 0.5714 | A |
| 5 | BICF2P277249           | 5937923 | 0 | 0   | 0      | G |
| 5 | BICF2P94903            | 5941857 | C | 0   | 0      | G |
| 5 | BICF2S22918910         | 5952369 | G | 0.5 | 0.5714 | A |
| 5 | BICF2P822990           | 5960485 | A | 0   | 0      | G |
| 5 | BICF2P574548           | 5976732 | A | 0.5 | 0.5714 | G |
| 5 | BICF2S23716205         | 5980372 | A | 0   | 0      | T |
| 5 | BICF2S23317601         | 5998728 | G | 0.5 | 0.5714 | A |
| 5 | BICF2S23225204         | 6025573 | A | 0.5 | 0.5714 | G |
| 5 | BICF2P1463618          | 6031051 | A | 0   | 0      | G |
| 5 | BICF2S2368993          | 6048559 | A | 0   | 0      | G |
| 5 | BICF2P1489253          | 6058123 | A | NA  | 0.9    | G |
| 5 | BICF2S22919400         | 6060683 | A | 0.5 | 0.7857 | C |
| 5 | BICF2S22951159         | 6073736 | A | 0.5 | 0.7857 | G |
| 5 | BICF2P458418           | 6085601 | A | 0.5 | 0.7857 | G |
| 5 | BICF2P946923           | 6095996 | A | 0   | 0      | G |
| 5 | BICF2P1336010          | 6110503 | G | 0   | 0      | A |
| 5 | BICF2S23424650         | 6125853 | A | 0   | 0      | G |
| 5 | BICF2P109254           | 6132159 | A | 0   | 0      | G |
| 5 | BICF2S22956006         | 6142871 | A | 0.5 | 0.7857 | G |
| 5 | TIGRP2P73489_rs8781647 | 6162210 | 0 | 0   | 0      | C |
| 5 | BICF2P678287           | 6169061 | 0 | 0   | 0      | G |
| 5 | BICF2P418082           | 6181271 | 0 | 0   | 0      | G |
| 5 | BICF2P328089           | 6187161 | 0 | 0   | 0      | A |
| 5 | BICF2S23718810         | 6221628 | A | 0.5 | 0.7857 | G |
| 5 | BICF2P361729           | 6234873 | G | 0.5 | 0.7857 | C |
| 5 | BICF2P358450           | 6247457 | A | 0   | 0      | G |

|   |                        |         |   |     |        |   |
|---|------------------------|---------|---|-----|--------|---|
| 5 | BICF2S23423433         | 6264155 | A | 0   | 0      | C |
| 5 | BICF2P95925            | 6277167 | G | 0.5 | 0.7857 | C |
| 5 | BICF2S23044458         | 6288253 | G | 0.5 | 0.7857 | A |
| 5 | BICF2P249643           | 6290277 | A | 0.5 | 0.2143 | T |
| 5 | TIGRP2P73491_rs8806909 | 6295243 | 0 | 0   | 0      | G |
| 5 | BICF2P998148           | 6307113 | G | 0.5 | 0.7857 | A |
| 5 | BICF2S23443345         | 6324948 | C | 0   | 0      | A |
| 5 | BICF2P623280           | 6346954 | G | 0   | 0      | A |
| 5 | BICF2S2339277          | 6355278 | G | 0   | 0      | A |
| 5 | BICF2P1201958          | 6361572 | C | 0   | 0      | A |
| 5 | BICF2P970174           | 6371504 | G | 0   | 0.2143 | A |
| 5 | BICF2S23621667         | 6371874 | G | 0   | 0.2143 | A |
| 5 | BICF2S2367248          | 6376251 | G | 0   | 0.2143 | A |
| 5 | BICF2S23212839         | 6382805 | G | 0   | 0.2143 | A |
| 5 | BICF2S22948594         | 6395969 | C | 0   | 0.2143 | A |
| 5 | BICF2P928430           | 6406245 | C | 0   | 0      | A |
| 5 | BICF2P104550           | 6422437 | A | 0   | 0.2143 | G |
| 5 | BICF2P905612           | 6438626 | A | 0   | 0.2143 | G |
| 5 | BICF2P346474           | 6442368 | A | 0   | 0      | G |
| 5 | BICF2P821272           | 6462042 | G | 0.5 | 0.7857 | A |
| 5 | BICF2P496900           | 6468702 | A | 0.5 | 0.7857 | G |
| 5 | BICF2P1161121          | 6468991 | A | 0   | 0      | G |
| 5 | BICF2S23342198         | 6484160 | A | 0.5 | 0.8333 | G |
| 5 | BICF2P386891           | 6489792 | A | 0   | 0      | G |
| 5 | BICF2P327120           | 6501229 | A | 0.5 | 0.2143 | G |
| 5 | BICF2P1011341          | 6511850 | C | 0   | 0      | A |
| 5 | BICF2S23014890         | 6523125 | A | 0.5 | 0.2143 | G |
| 5 | BICF2S23749922         | 6542442 | 0 | 0   | 0      | A |
| 5 | BICF2P1220399          | 6551490 | A | 0.5 | 0.2143 | T |
| 5 | BICF2P988510           | 6561550 | A | 0.5 | 0.7857 | G |
| 5 | BICF2P988505           | 6563412 | C | 0.5 | 0.1667 | A |
| 5 | BICF2P298458           | 6568259 | C | 0.5 | 0.2143 | A |
| 5 | BICF2P660389           | 6585039 | A | 0.5 | 0.2143 | G |
| 5 | BICF2S23047171         | 6600112 | A | 0   | 0      | G |
| 5 | TIGRP2P73496_rs8548167 | 6611464 | 0 | 0   | 0      | A |
| 5 | BICF2P609378           | 6632641 | A | 0.5 | 0.2143 | G |
| 5 | BICF2S23733179         | 6641594 | A | 0.5 | 0.2143 | G |
| 5 | BICF2P289685           | 6654666 | A | 0.5 | 0.7857 | G |
| 5 | BICF2S23411666         | 6666105 | A | 0.5 | 0.7857 | G |
| 5 | BICF2S23250848         | 6672170 | A | 0.5 | 0.2143 | C |
| 5 | BICF2P939030           | 6681601 | G | 0.5 | 0.2143 | A |
| 5 | BICF2P612888           | 6708781 | A | 0.5 | 0.7857 | G |
| 5 | BICF2P570076           | 6726621 | A | 0   | 0      | G |
| 5 | BICF2S23020630         | 6734516 | A | 0.5 | 0.7857 | G |
| 5 | BICF2P422814           | 6739940 | A | 0.5 | 0.7857 | G |
| 5 | TIGRP2P73498_rs8813145 | 6764276 | 0 | 0   | 0      | C |
| 5 | G323f51S335            | 6782936 | A | 0.5 | 0.2143 | G |

|   |                        |         |   |     |        |   |
|---|------------------------|---------|---|-----|--------|---|
| 5 | BICF2S2372976          | 6802372 | G | 0.5 | 0.1667 | A |
| 5 | BICF2P479084           | 6811163 | A | 0.5 | 0.2143 | G |
| 5 | BICF2P844114           | 6822191 | G | 0   | 0      | A |
| 5 | BICF2P1196760          | 6837959 | A | 0.5 | 0.2143 | C |
| 5 | BICF2S23411284         | 6846068 | G | 0.5 | 0.5714 | A |
| 5 | BICF2S23516808         | 6854115 | C | 0.5 | 0.2143 | G |
| 5 | BICF2S23028916         | 6872999 | A | 0   | 0      | G |
| 5 | BICF2P314907           | 6881047 | A | 0   | 0      | G |
| 5 | TIGRP2P73499_rs8891394 | 6890614 | 0 | 0   | 0      | A |
| 5 | BICF2P385491           | 6900850 | 0 | 0   | 0      | C |
| 5 | BICF2P396103           | 6919931 | 0 | 0   | 0      | A |
| 5 | BICF2P1052934          | 6923096 | G | 0   | 0      | A |
| 5 | BICF2P983907           | 6942016 | A | 0   | 0      | G |
| 5 | BICF2P1291712          | 6953139 | A | 0   | 0      | G |
| 5 | BICF2P763452           | 6959608 | A | 0   | 0      | G |
| 5 | TIGRP2P73500_rs8658143 | 6971242 | 0 | 0   | 0      | G |
| 5 | BICF2S22926218         | 6989610 | C | 0   | 0      | A |
| 5 | BICF2P893669           | 6993873 | A | 0   | 0      | C |
| 5 | BICF2P294775           | 7004964 | A | 0   | 0      | C |
| 5 | BICF2P923672           | 7027318 | 0 | 0   | 0      | A |
| 5 | BICF2P993892           | 7045753 | A | 0   | 0      | G |
| 5 | BICF2P946105           | 7051426 | G | 0   | 0      | A |
| 5 | BICF2P563333           | 7067664 | A | 0.5 | 0.5714 | G |
| 5 | TIGRP2P73501_rs8955616 | 7075374 | 0 | 0   | 0      | C |
| 5 | BICF2P997516           | 7093497 | G | 0   | 0      | A |
| 5 | BICF2P328405           | 7097117 | G | 0   | 0      | A |
| 5 | BICF2P170610           | 7108476 | G | 0   | 0      | A |
| 5 | BICF2P1000377          | 7122325 | C | 0   | 0      | A |
| 5 | BICF2P321784           | 7135905 | G | 0   | 0      | A |
| 5 | BICF2P301624           | 7141864 | A | 0   | 0      | C |
| 5 | BICF2P904767           | 7156459 | G | 1   | 0.7857 | A |
| 5 | BICF2P803057           | 7172513 | C | 1   | 0.7857 | A |
| 5 | BICF2P34472            | 7180036 | A | 1   | 0.7857 | C |
| 5 | TIGRP2P73504_rs8659642 | 7194072 | 0 | 0   | 0      | G |
| 5 | BICF2P1128068          | 7203176 | A | 1   | 0.7857 | G |
| 5 | BICF2P1228877          | 7220674 | T | 1   | 0.7857 | A |
| 5 | BICF2P1228880          | 7223976 | G | 1   | 0.7857 | A |
| 5 | BICF2P601729           | 7233793 | A | 1   | 1      | G |
| 5 | BICF2P204690           | 7246149 | A | 0   | 0.2143 | G |
| 5 | BICF2P1454248          | 7249608 | A | 0   | 0.2143 | G |
| 5 | BICF2S2368607          | 7263243 | G | 0   | 0      | A |
| 5 | G324f43S107            | 7299006 | G | 0.5 | 0.4286 | A |
| 5 | BICF2S23354874         | 7332927 | G | 0.5 | 0.4286 | A |
| 5 | BICF2P1179832          | 7340425 | 0 | 0   | 0      | A |
| 5 | BICF2S23716108         | 7357415 | A | 0.5 | 0.4286 | G |
| 5 | BICF2S2307909          | 7366369 | G | 0   | 0      | C |
| 5 | BICF2S23048095         | 7382306 | A | 0.5 | 0.4286 | T |

|   |                        |         |   |     |        |   |
|---|------------------------|---------|---|-----|--------|---|
| 5 | BICF2S23313988         | 7391060 | G | 0.5 | 0.4286 | A |
| 5 | BICF2P1216277          | 7397084 | 0 | 0   | 0      | A |
| 5 | BICF2P1036955          | 7407297 | A | 0.5 | 0.4286 | G |
| 5 | BICF2P512060           | 7411215 | A | 0.5 | 0.4286 | G |
| 5 | BICF2P928381           | 7425061 | C | 0.5 | 0.4286 | A |
| 5 | BICF2P466850           | 7450719 | A | 0.5 | 0.4167 | C |
| 5 | BICF2P169441           | 7460558 | G | 0.5 | 0.4286 | C |
| 5 | TIGRP2P73510_rs9106036 | 7470123 | 0 | 0   | 0      | G |
| 5 | BICF2P1281485          | 7482639 | 0 | 0   | 0      | G |
| 5 | BICF2P27483            | 7502526 | A | 0   | 0      | G |
| 5 | BICF2P1216802          | 7517027 | A | 0.5 | 0.4286 | G |
| 5 | BICF2P1075101          | 7521234 | 0 | 0   | 0      | G |
| 5 | BICF2P985803           | 7532778 | G | 0.5 | 0.4286 | A |
| 5 | BICF2P588552           | 7551712 | G | 0.5 | 0.4286 | A |
| 5 | BICF2P322252           | 7574500 | A | 0   | 0.2143 | G |
| 5 | BICF2P877535           | 7587421 | A | 0.5 | 0.4286 | C |
| 5 | BICF2P633894           | 7608309 | G | 0.5 | 0.4286 | A |
| 5 | BICF2P1444435          | 7622557 | A | 0.5 | 0.4286 | G |
| 5 | BICF2P760817           | 7636126 | 0 | 0   | 0      | A |
| 5 | BICF2S23616325         | 7657908 | A | 0   | 0      | G |
| 5 | BICF2P293444           | 7661842 | A | 0   | 0.2143 | G |
| 5 | BICF2P449192           | 7671826 | G | 0   | 0.2143 | A |
| 5 | BICF2P355426           | 7684888 | A | 0   | 0      | G |
| 5 | BICF2S2313550          | 7693481 | G | 0   | 0.2143 | A |
| 5 | BICF2P684237           | 7704011 | A | 0   | 0      | G |
| 5 | BICF2P892636           | 7711426 | G | 0   | 0.2143 | A |
| 5 | BICF2P269678           | 7721397 | G | 0   | 0      | A |
| 5 | BICF2P306752           | 7729020 | C | 0.5 | 0.4286 | A |
| 5 | BICF2P650448           | 7749905 | A | 0   | 0.2143 | G |
| 5 | BICF2P1226388          | 7756159 | G | 1   | 0.7857 | A |
| 5 | BICF2P1108144          | 7773174 | A | 1   | 0.7857 | C |
| 5 | BICF2P111587           | 7784639 | G | 1   | 0.7857 | A |
| 5 | BICF2P1022876          | 7787722 | 0 | 0   | 0      | G |
| 5 | BICF2P362486           | 7800486 | A | 0   | 0.2143 | G |
| 5 | BICF2P1083233          | 7809960 | A | 0   | 0.2143 | G |
| 5 | BICF2P1113875          | 7826084 | A | 0   | 0.2143 | C |
| 5 | BICF2P990630           | 7841252 | G | 0   | 0      | A |
| 5 | BICF2P553048           | 7847373 | G | 1   | 0.7857 | A |
| 5 | BICF2P441206           | 7860155 | A | 0   | 0      | G |
| 5 | TIGRP2P73517_rs8784336 | 7875549 | 0 | 0   | 0      | G |
| 5 | BICF2P1252730          | 7895618 | A | 0   | 0      | G |
| 5 | BICF2P823483           | 7903247 | A | 1   | 0.7857 | G |
| 5 | BICF2P1272902          | 7913607 | A | 1   | 0.7857 | G |
| 5 | BICF2P259784           | 7927672 | 0 | 0   | 0      | A |
| 5 | BICF2G63029786         | 7940183 | A | NA  | 0.625  | C |
| 5 | BICF2P1143709          | 7957120 | 0 | 0   | 0      | A |
| 5 | G325f44S300            | 7982325 | G | 0.5 | 0.4286 | A |

|   |                        |         |   |     |        |   |
|---|------------------------|---------|---|-----|--------|---|
| 5 | TIGRP2P73519_rs8546790 | 8002061 | 0 | 0   | 0      | G |
| 5 | BICF2P453866           | 8007493 | A | 0.5 | 0.4286 | G |
| 5 | BICF2S23028486         | 8028303 | 0 | 0   | 0      | G |
| 5 | BICF2S23617216         | 8049849 | A | 0.5 | 0.4286 | G |
| 5 | BICF2S23655418         | 8054776 | G | 0   | 0      | A |
| 5 | TIGRP2P73520_rs8558250 | 8069590 | 0 | 0   | 0      | G |
| 5 | BICF2P1453799          | 8078703 | A | 0   | 0      | C |
| 5 | BICF2S23345084         | 8086546 | A | 0   | 0      | G |
| 5 | BICF2P367820           | 8117843 | G | 0.5 | 0.4286 | A |
| 5 | BICF2P1416575          | 8123860 | A | 0   | 0      | G |
| 5 | BICF2P786776           | 8133936 | G | 0.5 | 0.4286 | A |
| 5 | BICF2P595992           | 8145181 | A | 0   | 0      | G |
| 5 | BICF2P100247           | 8153182 | G | 0.5 | 0.2143 | A |
| 5 | BICF2P679226           | 8164493 | A | 0   | 0      | G |
| 5 | BICF2P679228           | 8165567 | A | 0   | 0      | C |
| 5 | BICF2P679235           | 8167840 | C | 0   | 0      | G |
| 5 | BICF2P161774           | 8178275 | A | 0   | 0      | G |
| 5 | BICF2P559023           | 8181132 | C | 0.5 | 0.2143 | A |
| 5 | BICF2S23331443         | 8198098 | A | 0.5 | 0.2143 | G |
| 5 | BICF2P1270553          | 8199726 | C | 0   | 0      | A |
| 5 | BICF2P212434           | 8220709 | A | 0   | 0      | G |
| 5 | BICF2P1460811          | 8226617 | A | 0   | 0      | T |
| 5 | BICF2P587342           | 8236608 | C | 0.5 | 0.2143 | A |
| 5 | BICF2P1190362          | 8246297 | G | 0   | 0      | A |
| 5 | BICF2P199944           | 8264978 | 0 | 0   | 0      | A |
| 5 | BICF2P1031709          | 8270658 | 0 | 0   | 0      | A |
| 5 | BICF2P727870           | 8284381 | 0 | 0   | 0      | G |
| 5 | BICF2S23516940         | 8309107 | G | 0.5 | 0.7857 | A |
| 5 | BICF2P393947           | 8317993 | A | 0   | 0.2143 | G |
| 5 | BICF2P1238336          | 8330532 | A | 0   | 0.2143 | G |
| 5 | BICF2S23764223         | 8351353 | 0 | 0   | 0      | G |
| 5 | BICF2P1433032          | 8360922 | A | 0   | 0.2143 | C |
| 5 | BICF2P514190           | 8372980 | 0 | 0   | 0      | G |
| 5 | BICF2S2374670          | 8386024 | G | 0.5 | 0.5714 | A |
| 5 | BICF2S23251941         | 8402221 | A | 0   | 0      | G |
| 5 | BICF2S23648905         | 8413628 | A | 0.5 | 0.5714 | G |
| 5 | BICF2P807873           | 8428475 | A | 0.5 | 0.2143 | G |
| 5 | BICF2P778319           | 8431406 | A | 0.5 | 0.2143 | G |
| 5 | BICF2P577422           | 8441119 | C | 0   | 0.2143 | A |
| 5 | BICF2P941840           | 8461462 | G | 0   | 0.2143 | A |
| 5 | BICF2P835938           | 8474798 | A | 0   | 0.1667 | G |
| 5 | BICF2P547394           | 8487193 | A | 0.5 | 0.2143 | G |
| 5 | BICF2P596163           | 8499362 | A | 0   | 0      | G |
| 5 | BICF2P113307           | 8520585 | A | 0   | 0      | G |
| 5 | BICF2P409041           | 8525720 | G | 0   | 0      | A |
| 5 | BICF2P425559           | 8534361 | G | 0   | 0.2143 | A |
| 5 | BICF2P459093           | 8545161 | G | 0   | 0      | A |



|   |                        |         |   |   |        |   |
|---|------------------------|---------|---|---|--------|---|
| 5 | BICF2P775495           | 8575669 | G | 0 | 0.2143 | A |
| 5 | BICF2P1145854          | 8585886 | G | 1 | 0.7857 | A |
| 5 | BICF2P967481           | 8600959 | A | 1 | 0.8333 | G |
| 5 | BICF2P1216168          | 8611182 | T | 1 | 0.7857 | A |
| 5 | BICF2P177246           | 8616904 | 0 | 0 | 0      | G |
| 5 | BICF2P1252515          | 8633038 | A | 0 | 0      | G |
| 5 | BICF2P507935           | 8644109 | G | 1 | 0.7857 | A |
| 5 | BICF2P38116            | 8658391 | C | 1 | 0.7857 | A |
| 5 | BICF2P186795           | 8660653 | C | 0 | 0      | A |
| 5 | BICF2S23042567         | 8671724 | A | 1 | 0.7857 | C |
| 5 | BICF2P433258           | 8685927 | G | 1 | 0.7857 | A |
| 5 | BICF2P562411           | 8696240 | A | 0 | 0      | G |
| 5 | BICF2P170762           | 8718248 | A | 0 | 0      | G |
| 5 | TIGRP2P73530_rs9107162 | 8730733 | 0 | 0 | 0      | C |
| 5 | BICF2S23445477         | 8761953 | G | 1 | 0.7857 | A |
| 5 | BICF2P1162142          | 8774202 | A | 0 | 0      | G |
| 5 | BICF2P1162141          | 8777090 | A | 0 | 0      | C |
| 5 | BICF2P1305555          | 8790991 | 0 | 0 | 0      | A |
| 5 | BICF2S2373655          | 8802527 | G | 0 | 0      | A |
| 5 | BICF2S23539848         | 8817649 | A | 0 | 0      | C |
| 5 | BICF2P511566           | 8825848 | G | 0 | 0.2143 | A |
| 5 | BICF2S23650339         | 8849907 | C | 0 | 0.2143 | A |
| 5 | BICF2P648039           | 8856895 | G | 0 | 0.2143 | A |
| 5 | BICF2P1120663          | 8871210 | G | 0 | 0.2143 | A |
| 5 | TIGRP2P73532_rs8771680 | 8878858 | 0 | 0 | 0      | A |
| 5 | BICF2S22938380         | 8897619 | A | 0 | 0      | G |
| 5 | BICF2P1347006          | 8901998 | A | 0 | 0      | G |
| 5 | BICF2S23251377         | 8913258 | A | 0 | 0      | G |
| 5 | BICF2P798746           | 8941225 | A | 0 | 0      | C |
| 5 | BICF2P361727           | 8955468 | A | 0 | 0      | G |
| 5 | BICF2P1052213          | 8958697 | A | 0 | 0      | G |
| 5 | BICF2P1075940          | 8970642 | 0 | 0 | 0      | G |
| 5 | BICF2P1330496          | 8982583 | A | 0 | 0      | G |
| 5 | BICF2P969459           | 8993156 | C | 0 | 0      | A |
| 5 | BICF2P1260756          | 9003478 | A | 0 | 0      | G |
| 5 | BICF2P1260757          | 9003790 | A | 0 | 0      | G |
| 5 | BICF2P209036           | 9014826 | A | 0 | 0      | G |
| 5 | BICF2P231169           | 9016714 | 0 | 0 | 0      | A |
| 5 | BICF2P1044913          | 9033125 | G | 0 | 0      | A |
| 5 | BICF2P807093           | 9043641 | 0 | 0 | 0      | G |
| 5 | BICF2S23656242         | 9060221 | 0 | 0 | 0      | A |
| 5 | BICF2P419806           | 9081965 | G | 0 | 0.2143 | A |
| 5 | BICF2P6354             | 9093402 | G | 0 | 0.2143 | A |
| 5 | BICF2P195002           | 9097360 | A | 0 | 0.2143 | C |
| 5 | BICF2P599920           | 9112951 | A | 0 | 0.2143 | G |
| 5 | BICF2S23641666         | 9120531 | A | 0 | 0      | G |
| 5 | BICF2P694044           | 9144363 | G | 0 | 0      | A |

|   |                |         |   |     |        |   |
|---|----------------|---------|---|-----|--------|---|
| 5 | BICF2P671395   | 9154232 | A | 0.5 | 0.5    | G |
| 5 | BICF2P274462   | 9166427 | A | 0.5 | 0.5    | G |
| 5 | BICF2P480018   | 9179033 | A | 0.5 | 0.5    | G |
| 5 | BICF2P1383988  | 9192686 | A | 0.5 | 0.5    | G |
| 5 | BICF2S24414079 | 9210602 | 0 | 0   | 0      | C |
| 5 | BICF2S233180   | 9213807 | A | 0   | 0      | C |
| 5 | BICF2P122791   | 9236017 | 0 | 0   | 0      | G |
| 5 | BICF2P526985   | 9260074 | 0 | 0   | 0      | G |
| 5 | BICF2S23311763 | 9271502 | 0 | 0   | 0      | G |
| 5 | BICF2S22929451 | 9303481 | 0 | 0   | 0      | A |
| 5 | BICF2P1002841  | 9305559 | 0 | 0   | 0      | A |
| 5 | BICF2P696751   | 9322251 | 0 | 0   | 0      | A |
| 5 | BICF2P1108003  | 9327073 | A | 0.5 | 0.5    | G |
| 5 | BICF2P901051   | 9341108 | A | 0.5 | 0.5    | T |
| 5 | BICF2S234771   | 9381287 | T | 0   | 0      | A |
| 5 | BICF2P323743   | 9394659 | A | 0   | 0      | G |
| 5 | BICF2P1347656  | 9397630 | A | 0   | 0      | T |
| 5 | BICF2S2448481  | 9409914 | 0 | 0   | 0      | G |
| 5 | BICF2P1223677  | 9429066 | A | 0.5 | 0.5    | G |
| 5 | BICF2P1223676  | 9433040 | 0 | 0   | 0      | G |
| 5 | BICF2P897594   | 9454814 | 0 | 0   | 0      | A |
| 5 | BICF2P695937   | 9475139 | C | 0   | 0      | G |
| 5 | BICF2P238498   | 9486787 | 0 | 0   | 0      | G |
| 5 | BICF2P671327   | 9489918 | 0 | 0   | 0      | A |
| 5 | BICF2P236473   | 9500981 | A | 0   | 0      | G |
| 5 | BICF2P928339   | 9512590 | A | 0   | 0      | C |
| 5 | BICF2P792620   | 9531655 | G | 0   | 0      | A |
| 5 | BICF2P446931   | 9544597 | T | 0   | 0      | A |
| 5 | BICF2P142759   | 9550347 | A | 0.5 | 0.5    | G |
| 5 | BICF2P1045926  | 9558009 | A | 0.5 | 0.5    | G |
| 5 | BICF2S23136278 | 9599696 | A | 0.5 | 0.5    | G |
| 5 | BICF2S23139217 | 9603848 | G | 0.5 | 0.5    | A |
| 5 | BICF2P574481   | 9614044 | 0 | 0   | 0      | G |
| 5 | BICF2S22963731 | 9630785 | A | 0   | 0      | T |
| 5 | BICF2S23648363 | 9655372 | A | 0.5 | 0.5    | G |
| 5 | BICF2P1027720  | 9671740 | A | 0   | 0.2143 | G |
| 5 | BICF2P229894   | 9690103 | G | 0   | 0.2143 | A |
| 5 | BICF2P27987    | 9696998 | C | 0   | 0      | G |
| 5 | BICF2P23185    | 9710306 | G | 0   | 0      | A |
| 5 | BICF2P755609   | 9719169 | A | 0   | 0      | G |
| 5 | BICF2P403938   | 9725557 | G | 0   | 0      | A |
| 5 | BICF2P740506   | 9739332 | A | 0   | 0      | G |
| 5 | BICF2P563884   | 9745992 | G | 0   | 0      | A |
| 5 | BICF2S22931998 | 9753213 | G | 0   | 0      | A |
| 5 | BICF2P880291   | 9775791 | G | 0.5 | 0.5    | A |
| 5 | BICF2P591233   | 9789678 | A | 0.5 | 0.5    | G |
| 5 | BICF2P989392   | 9798988 | G | 0.5 | 0.5    | A |

|   |                |          |   |     |     |   |
|---|----------------|----------|---|-----|-----|---|
| 5 | BICF2P747550   | 9812910  | A | 0.5 | 0.5 | G |
| 5 | BICF2S23319496 | 9840309  | A | 0.5 | 0.5 | G |
| 5 | BICF2P1406785  | 9846907  | G | 0.5 | 0.5 | A |
| 5 | BICF2S22944200 | 9861068  | G | 0.5 | 0.5 | A |
| 5 | BICF2P1058372  | 9877020  | A | 0.5 | 0.5 | C |
| 5 | BICF2P262865   | 9889825  | G | 0.5 | 0.5 | A |
| 5 | BICF2P783651   | 9901470  | A | 0.5 | 0.5 | G |
| 5 | BICF2P429415   | 9909125  | G | 0.5 | 0.5 | A |
| 5 | BICF2P108968   | 9920932  | A | 0.5 | 0.5 | G |
| 5 | BICF2P1334895  | 9935296  | T | 0.5 | 0.5 | A |
| 5 | BICF2P793888   | 9944659  | G | 0.5 | 0.5 | A |
| 5 | BICF2P164592   | 9950297  | A | 0.5 | 0.5 | G |
| 5 | BICF2P1195515  | 9965683  | 0 | 0   | 0   | A |
| 5 | BICF2P233219   | 9974862  | 0 | 0   | 0   | A |
| 5 | BICF2S23233557 | 9993114  | C | 0.5 | 0.5 | A |
| 5 | BICF2P1139266  | 9994525  | 0 | 0   | 0   | C |
| 5 | BICF2P417629   | 10011493 | G | 0.5 | 0.5 | A |
| 5 | BICF2P267691   | 10022427 | 0 | 0   | 0   | C |
| 5 | BICF2P849588   | 10033060 | 0 | 0   | 0   | A |
| 5 | BICF2P425900   | 10041907 | 0 | 0   | 0   | G |
| 5 | BICF2P755037   | 10056554 | A | 0   | 0   | G |
| 5 | BICF2P876498   | 10073869 | G | 0   | 0   | A |
| 5 | BICF2S23727124 | 10099391 | G | 0.5 | 0.5 | A |
| 5 | BICF2S23224141 | 10108534 | A | 0.5 | 0.5 | G |
| 5 | BICF2P238221   | 10128161 | G | 0.5 | 0.5 | A |
| 5 | BICF2P713312   | 10135024 | G | 0.5 | 0.5 | A |
| 5 | BICF2S23647820 | 10150114 | A | 0   | 0   | G |
| 5 | BICF2P1338552  | 10161015 | A | 0.5 | 0.5 | G |
| 5 | BICF2S23251688 | 10172032 | A | 0.5 | 0.5 | G |
| 5 | BICF2P566212   | 10186513 | A | 0.5 | 0.5 | G |
| 5 | BICF2P339373   | 10191993 | G | 0.5 | 0.5 | A |
| 5 | BICF2P1075451  | 10218955 | A | 0.5 | 0.5 | G |
| 5 | BICF2P414980   | 10223783 | G | 0.5 | 0.5 | A |
| 5 | BICF2P918372   | 10226190 | A | 0.5 | 0.5 | G |
| 5 | BICF2P1271812  | 10241643 | A | 0.5 | 0.5 | G |
| 5 | BICF2S23120518 | 10252621 | A | 0.5 | 0.5 | G |
| 5 | BICF2P754020   | 10259031 | G | 0.5 | 0.5 | A |
| 5 | BICF2S23451221 | 10271055 | G | 0.5 | 0.5 | A |
| 5 | BICF2P610605   | 10290006 | G | 0   | 0   | A |
| 5 | BICF2P1245235  | 10322417 | G | 0.5 | 0.5 | A |
| 5 | BICF2P888461   | 10346793 | A | 0   | 0   | G |
| 5 | BICF2S23634726 | 10350567 | C | 0   | 0   | G |
| 5 | BICF2P970472   | 10365810 | A | 0   | 0   | C |
| 5 | BICF2S23411584 | 10373683 | G | 0   | 0   | A |
| 5 | BICF2P1018796  | 10385293 | 0 | 0   | 0   | A |
| 5 | BICF2P900105   | 10397310 | C | 0   | 0   | A |
| 5 | BICF2P509022   | 10407926 | A | 0   | 0   | G |

|   |                |          |   |     |     |   |
|---|----------------|----------|---|-----|-----|---|
| 5 | BICF2P1029684  | 10421446 | G | 0   | 0   | A |
| 5 | BICF2P256064   | 10441003 | A | 0   | 0   | T |
| 5 | BICF2P508313   | 10445445 | A | 0   | 0   | G |
| 5 | BICF2P1063131  | 10461643 | G | 0   | 0   | A |
| 5 | BICF2S23316058 | 10465026 | A | 0.5 | 0.5 | G |
| 5 | BICF2P820756   | 10485924 | G | 0.5 | 0.5 | A |
| 5 | BICF2S23631341 | 10497290 | 0 | 0   | 0   | G |
| 5 | BICF2P690235   | 10505237 | G | 0   | 0   | A |
| 5 | BICF2P1471782  | 10511987 | C | 0.5 | 0.5 | G |
| 5 | BICF2S23518539 | 10529652 | A | 0   | 0   | G |
| 5 | BICF2P738079   | 10534379 | A | 0   | 0   | G |
| 5 | BICF2P1401927  | 10550916 | G | 0   | 0   | A |
| 5 | BICF2P1198876  | 10565740 | G | 0   | 0   | A |
| 5 | BICF2S23229297 | 10574896 | A | 0   | 0   | G |
| 5 | BICF2P1409972  | 10587628 | G | 0.5 | 0.5 | A |
| 5 | BICF2S23312759 | 10593209 | G | 0.5 | 0.5 | A |
| 5 | BICF2P1126494  | 10611371 | A | 0.5 | 0.5 | G |
| 5 | BICF2P1298     | 10618754 | A | 0.5 | 0.5 | G |
| 5 | BICF2P420675   | 10624696 | A | 0   | 0   | G |
| 5 | BICF2P420676   | 10624870 | A | 0   | 0   | G |
| 5 | BICF2P420678   | 10626038 | A | 0   | 0   | C |
| 5 | BICF2P965823   | 10648948 | G | 0.5 | 0.5 | A |
| 5 | BICF2P965825   | 10649581 | C | 0   | 0   | G |
| 5 | BICF2S2331073  | 10667930 | A | 0.5 | 0.5 | G |
| 5 | BICF2P992296   | 10689794 | A | 0   | 0   | G |
| 5 | BICF2P1153431  | 10699593 | A | 0   | 0   | G |
| 5 | BICF2S23025903 | 10709446 | A | 0.5 | 0.5 | G |
| 5 | BICF2S23519930 | 10728844 | G | 0.5 | 0.5 | A |
| 5 | BICF2P936127   | 10738903 | A | 0.5 | 0.5 | G |
| 5 | BICF2P1051614  | 10749378 | A | 1   | 1   | G |
| 5 | BICF2P181763   | 10753716 | A | 0   | 0   | G |
| 5 | BICF2S23433857 | 10774160 | G | 0   | 0   | A |
| 5 | BICF2S23121408 | 10777123 | A | 0   | 0   | G |
| 5 | BICF2S23537652 | 10803369 | G | 0   | 0   | A |
| 5 | BICF2S2335445  | 10817786 | A | 0.5 | 0.5 | G |
| 5 | BICF2S23260147 | 10835304 | A | 0   | 0   | G |
| 5 | BICF2P1056510  | 10863587 | C | 0   | 0   | A |
| 5 | BICF2P443528   | 10868132 | 0 | 0   | 0   | A |
| 5 | BICF2S23336119 | 10884067 | C | 0   | 0   | A |
| 5 | BICF2S23544923 | 10897305 | G | 0   | 0   | A |
| 5 | BICF2P321097   | 10905328 | A | 0   | 0   | G |
| 5 | BICF2P581289   | 10924159 | A | 0.5 | 0.5 | G |
| 5 | BICF2P1088190  | 10929591 | G | 0   | 0   | C |
| 5 | BICF2P1252369  | 10939048 | G | 0.5 | 0.5 | A |
| 5 | BICF2P1304606  | 10945409 | G | 0   | 0   | C |
| 5 | BICF2P1382751  | 10958104 | A | 0   | 0   | G |
| 5 | BICF2P861901   | 10969082 | G | 0   | 0   | A |

|   |                        |          |   |     |        |   |
|---|------------------------|----------|---|-----|--------|---|
| 5 | BICF2P696509           | 10979208 | G | 0.5 | 0.5    | A |
| 5 | BICF2P127169           | 10987063 | A | 0   | 0      | C |
| 5 | BICF2P1116413          | 10999889 | A | 0   | 0      | T |
| 5 | TIGRP2P69237_rs8716033 | 11015838 | 0 | 0   | 0      | A |
| 5 | BICF2P1132629          | 11018174 | C | 0.5 | 0.5    | G |
| 5 | BICF2P1198736          | 11039782 | A | 0.5 | 0.5    | G |
| 5 | BICF2S23214566         | 11040870 | A | 0   | 0.2143 | G |
| 5 | BICF2P91381            | 11054525 | C | 1   | 0.7857 | G |
| 5 | BICF2P1246599          | 11070616 | G | 0   | 0      | A |
| 5 | BICF2S23036030         | 11082019 | A | 0.5 | 0.5    | G |
| 5 | BICF2P801692           | 11098995 | A | 0.5 | 0.5    | G |
| 5 | BICF2P1266439          | 11107972 | A | 0   | 0      | G |
| 5 | TIGRP2P69239_rs8760907 | 11110824 | 0 | 0   | 0      | G |
| 5 | BICF2S23318127         | 11124145 | A | 0   | 0.2143 | G |
| 5 | BICF2P569504           | 11143162 | A | 0   | 0      | G |
| 5 | BICF2S23247073         | 11172089 | A | 0   | 0      | G |
| 5 | BICF2S23648390         | 11179986 | A | 0   | 0      | C |
| 5 | BICF2S23134295         | 11185193 | A | 0   | 0      | G |
| 5 | BICF2S23354345         | 11192338 | 0 | 0   | 0      | G |
| 5 | BICF2P677197           | 11201680 | A | 0   | 0      | G |
| 5 | BICF2P27872            | 11222952 | G | 0.5 | 0.7143 | A |
| 5 | BICF2P27877            | 11225752 | A | 1   | 1      | G |
| 5 | BICF2S23545738         | 11240220 | A | 0.5 | 0.125  | G |
| 5 | BICF2P377323           | 11250501 | A | 0.5 | 0.2857 | G |
| 5 | BICF2P266391           | 11267932 | C | 0.5 | 0.7143 | A |
| 5 | BICF2P936883           | 11283458 | 0 | 0   | 0      | G |
| 5 | BICF2P786311           | 11300258 | 0 | 0   | 0      | G |
| 5 | BICF2P1407423          | 11305816 | G | 0.5 | 0.2857 | A |
| 5 | BICF2P1235803          | 11316954 | A | 0   | 0      | G |
| 5 | BICF2P978215           | 11331372 | A | 0   | 0      | G |
| 5 | BICF2P245720           | 11350367 | A | 0   | 0      | G |
| 5 | BICF2S23722093         | 11356448 | A | 0   | 0.2143 | G |
| 5 | BICF2P340539           | 11365120 | G | 1   | 1      | A |
| 5 | BICF2P77482            | 11376892 | G | 0   | 0      | A |
| 5 | BICF2P1035987          | 11380134 | A | 0   | 0      | G |
| 5 | BICF2P1324173          | 11387458 | G | 0   | 0      | A |
| 5 | BICF2P468971           | 11402056 | 0 | 0   | 0      | G |
| 5 | BICF2P195501           | 11415041 | A | 0   | 0      | G |
| 5 | BICF2P90315            | 11425115 | 0 | 0   | 0      | A |
| 5 | BICF2P323435           | 11442115 | G | 0   | 0      | A |
| 5 | BICF2S22957866         | 11452821 | A | 0   | 0      | G |
| 5 | BICF2S23221365         | 11459112 | 0 | 0   | 0      | G |
| 5 | BICF2P631698           | 11465760 | A | 0.5 | 0.2857 | G |
| 5 | BICF2P526293           | 11473340 | A | 0.5 | 0.7143 | G |
| 5 | BICF2P288723           | 11478157 | 0 | 0   | 0      | A |
| 5 | BICF2P710978           | 11491221 | 0 | 0   | 0      | G |
| 5 | BICF2S2321232          | 11511412 | G | 0   | 0      | A |

|   |                        |          |   |     |        |   |
|---|------------------------|----------|---|-----|--------|---|
| 5 | BICF2P483462           | 11524556 | C | 0   | 0      | A |
| 5 | BICF2P1175359          | 11535735 | A | 0   | 0      | G |
| 5 | BICF2S23350669         | 11548014 | C | 0.5 | 0.2857 | A |
| 5 | BICF2S2314237          | 11559341 | A | 0.5 | 0.7143 | G |
| 5 | BICF2P756033           | 11574376 | A | 0.5 | 0.2857 | G |
| 5 | BICF2P1347622          | 11588444 | C | 0.5 | 0.2857 | A |
| 5 | BICF2P589843           | 11596807 | A | 0.5 | 0.7143 | G |
| 5 | BICF2S23030813         | 11605230 | 0 | 0   | 0      | G |
| 5 | BICF2S22945821         | 11620549 | C | 0.5 | 0.5    | A |
| 5 | BICF2P80998            | 11626631 | A | 0.5 | 0.2857 | G |
| 5 | BICF2P1513296          | 11641915 | A | 0.5 | 0.2857 | G |
| 5 | BICF2S23915973         | 11665319 | G | 0.5 | 0.5    | A |
| 5 | BICF2S23255824         | 11680172 | T | 0.5 | 0.7143 | A |
| 5 | BICF2P214985           | 11703129 | A | 0   | 0.2143 | G |
| 5 | BICF2P1364834          | 11709571 | G | 1   | 1      | A |
| 5 | BICF2S23760710         | 11727282 | 0 | 0   | 0      | T |
| 5 | BICF2S23211707         | 11749750 | 0 | 0   | 0      | G |
| 5 | BICF2S23035109         | 11757453 | A | 0   | 0      | G |
| 5 | BICF2P143005           | 11782563 | G | 0   | 0      | A |
| 5 | BICF2S23338809         | 11788973 | G | 0.5 | 0.2857 | A |
| 5 | BICF2P285774           | 11806996 | A | 0   | 0      | C |
| 5 | BICF2P1413950          | 11815077 | 0 | 0   | 0      | C |
| 5 | BICF2S2318369          | 11849961 | 0 | 0   | 0      | A |
| 5 | BICF2P1220267          | 11879801 | 0 | 0   | 0      | G |
| 5 | BICF2P1073124          | 11893611 | 0 | 0   | 0      | A |
| 5 | BICF2S23227133         | 11912661 | G | 0   | 0      | A |
| 5 | BICF2P1142329          | 11933903 | 0 | 0   | 0      | A |
| 5 | BICF2P389247           | 11938789 | 0 | 0   | 0      | G |
| 5 | BICF2P1142810          | 11954313 | A | 0   | 0      | C |
| 5 | BICF2P1142809          | 11954874 | A | 0   | 0      | G |
| 5 | BICF2P618001           | 11963111 | A | 0   | 0      | C |
| 5 | BICF2P441330           | 11990076 | A | 0.5 | 0.5    | G |
| 5 | BICF2P567779           | 11995050 | 0 | 0   | 0      | G |
| 5 | BICF2P473338           | 12013928 | G | 0.5 | 0.5    | A |
| 5 | BICF2P829190           | 12030443 | 0 | 0   | 0      | G |
| 5 | BICF2P689724           | 12035365 | A | 0.5 | 0.5    | G |
| 5 | TIGRP2P69333_rs9126746 | 12050756 | 0 | 0   | 0      | G |
| 5 | BICF2S23525452         | 12058319 | T | 0   | 0.2143 | A |
| 5 | BICF2P284882           | 12066205 | A | 1   | 0.7857 | G |
| 5 | BICF2P1333034          | 12078999 | A | 0   | 0.2143 | G |
| 5 | BICF2P313109           | 12089358 | A | 0   | 0.2143 | G |
| 5 | BICF2S23544899         | 12108061 | A | 0   | 0      | G |
| 5 | BICF2P291824           | 12117732 | G | 0   | 0      | A |
| 5 | BICF2P922080           | 12129573 | A | 0   | 0      | C |
| 5 | BICF2P1329657          | 12134149 | G | 0   | 0      | A |
| 5 | BICF2P1471836          | 12144492 | A | 0   | 0      | G |
| 5 | BICF2S23661616         | 12156834 | A | 0   | 0      | G |

|   |                        |          |   |     |        |   |
|---|------------------------|----------|---|-----|--------|---|
| 5 | BICF2P542783           | 12173468 | G | 0.5 | 0.2857 | A |
| 5 | BICF2P658339           | 12184635 | G | 0.5 | 0.2857 | A |
| 5 | BICF2S2311440          | 12211740 | G | 0.5 | 0.7143 | C |
| 5 | BICF2S23652232         | 12226926 | A | 0.5 | 0.2857 | T |
| 5 | BICF2P1210760          | 12234808 | A | 0   | 0      | G |
| 5 | BICF2P917384           | 12238082 | G | 0.5 | 0.75   | A |
| 5 | BICF2P270689           | 12257360 | A | 0.5 | 0.7143 | G |
| 5 | BICF2P1359766          | 12269705 | A | 0.5 | 0.7143 | G |
| 5 | BICF2S23325138         | 12269826 | A | 0   | 0      | G |
| 5 | BICF2S23744336         | 12277232 | A | 0.5 | 0.7143 | G |
| 5 | BICF2P791023           | 12283960 | G | 0.5 | 0.7143 | A |
| 5 | BICF2S23443188         | 12303349 | A | 0   | 0      | C |
| 5 | BICF2P1308329          | 12309350 | 0 | 0   | 0      | C |
| 5 | BICF2P270740           | 12335265 | 0 | 0   | 0      | G |
| 5 | BICF2S23626863         | 12364679 | 0 | 0   | 0      | G |
| 5 | BICF2S23542205         | 12379889 | A | 0   | 0      | G |
| 5 | BICF2P649922           | 12396622 | A | 0   | 0      | G |
| 5 | BICF2S23355971         | 12398294 | A | 0   | 0      | G |
| 5 | BICF2P1154998          | 12409186 | G | 1   | 1      | A |
| 5 | BICF2P1154993          | 12409662 | A | 0.5 | 0.5    | G |
| 5 | BICF2P1018940          | 12427619 | G | 1   | 1      | A |
| 5 | BICF2P50276            | 12442952 | A | 0.5 | 0.5    | G |
| 5 | BICF2P22830            | 12460594 | A | 0.5 | 0.5    | G |
| 5 | BICF2P1393128          | 12486652 | A | 0.5 | 0.5    | G |
| 5 | BICF2P758349           | 12492364 | 0 | 0   | 0      | G |
| 5 | BICF2P822706           | 12501391 | G | 0.5 | 0.5    | A |
| 5 | BICF2P829027           | 12519889 | A | 0.5 | 0.5    | G |
| 5 | BICF2P1435673          | 12526871 | A | 0.5 | 0.5    | G |
| 5 | BICF2P765257           | 12547442 | A | 0   | 0.2143 | G |
| 5 | BICF2P715466           | 12561460 | A | 0.5 | 0.5    | G |
| 5 | BICF2P397272           | 12565887 | G | 0.5 | 0.5    | A |
| 5 | BICF2P217349           | 12579201 | G | 0.5 | 0.7143 | A |
| 5 | BICF2P377004           | 12583708 | A | 0   | 0      | G |
| 5 | BICF2P132228           | 12594076 | A | 0   | 0      | G |
| 5 | TIGRP2P69341_rs8704434 | 12626418 | 0 | 0   | 0      | G |
| 5 | BICF2P517389           | 12629284 | G | 0.5 | 0.5    | A |
| 5 | BICF2P338054           | 12647234 | G | 0   | 0      | A |
| 5 | BICF2P1139153          | 12659103 | 0 | 0   | 0      | A |
| 5 | BICF2P808029           | 12664450 | G | 0   | 0      | A |
| 5 | BICF2P720245           | 12669075 | G | 0   | 0      | A |
| 5 | BICF2P181037           | 12679814 | C | 0   | 0.2143 | A |
| 5 | BICF2P176768           | 12694561 | A | 0   | 0.2143 | G |
| 5 | BICF2P728600           | 12716435 | A | 0.5 | 0.5    | G |
| 5 | BICF2P1232283          | 12719301 | G | 0.5 | 0.5    | A |
| 5 | BICF2P1367589          | 12740837 | G | 1   | 0.7857 | C |
| 5 | BICF2P1367586          | 12742216 | A | 1   | 0.7857 | G |
| 5 | BICF2P216035           | 12763852 | A | 1   | 0.7857 | G |

|   |                        |          |   |     |        |   |
|---|------------------------|----------|---|-----|--------|---|
| 5 | BICF2P866682           | 12766047 | G | 1   | 0.8333 | A |
| 5 | BICF2P945343           | 12776878 | G | 1   | 0.7857 | A |
| 5 | BICF2P870437           | 12796265 | G | 0   | 0      | A |
| 5 | BICF2P915346           | 12808553 | A | 1   | 0.7857 | G |
| 5 | BICF2P306969           | 12821552 | A | 1   | 0.7857 | G |
| 5 | BICF2P1496192          | 12835431 | A | 0   | 0      | T |
| 5 | BICF2P364550           | 12855516 | C | 0   | 0      | A |
| 5 | BICF2P460930           | 12867035 | A | 0.5 | 0.5    | G |
| 5 | BICF2S2338469          | 12887465 | A | 1   | 1      | G |
| 5 | BICF2S23717676         | 12902613 | A | 0.5 | 0.5    | G |
| 5 | BICF2P1152382          | 12904633 | 0 | 0   | 0      | A |
| 5 | BICF2P24839            | 12917375 | 0 | 0   | 0      | G |
| 5 | BICF2S23756307         | 12934988 | G | 0.5 | 0.5    | A |
| 5 | BICF2S23615385         | 12972537 | G | 0   | 0.2143 | A |
| 5 | BICF2P906919           | 12990799 | A | 0.5 | 0.5    | G |
| 5 | BICF2P1182162          | 12996719 | G | 1   | 0.9    | A |
| 5 | BICF2P813287           | 13008328 | C | 0   | 0.2143 | A |
| 5 | BICF2S23543795         | 13027174 | A | 0.5 | 0.2857 | C |
| 5 | BICF2P288040           | 13037107 | 0 | 0   | 0      | A |
| 5 | BICF2P490491           | 13057835 | C | 0.5 | 0.5    | G |
| 5 | BICF2S23611054         | 13131063 | C | 0   | 0.2143 | G |
| 5 | BICF2P1034442          | 13152546 | G | 0   | 0.1    | A |
| 5 | BICF2P1034441          | 13152739 | G | 0   | 0.2143 | A |
| 5 | BICF2P253414           | 13161629 | A | 0   | 0.1667 | C |
| 5 | BICF2P366738           | 13166847 | G | 0.5 | 0.5    | A |
| 5 | BICF2P288436           | 13170075 | A | 0.5 | 0.5    | G |
| 5 | BICF2P83127            | 13187692 | G | 0.5 | 0.5    | A |
| 5 | TIGRP2P69381_rs8583945 | 13196090 | 0 | 0   | 0      | G |
| 5 | BICF2S23514750         | 13203959 | A | 0.5 | 0.5    | G |
| 5 | BICF2S23124045         | 13218834 | A | 0.5 | 0.5    | G |
| 5 | BICF2P72123            | 13239645 | A | 0.5 | 0.5    | G |
| 5 | BICF2S24111973         | 13254970 | A | 0.5 | 0.5    | G |
| 5 | BICF2S23630064         | 13274263 | A | 0   | 0      | G |
| 5 | BICF2S23010456         | 13284621 | A | 0   | 0      | G |
| 5 | BICF2P269780           | 13310902 | G | 0   | 0      | A |
| 5 | BICF2P1269391          | 13321812 | A | 0   | 0      | G |
| 5 | BICF2P512578           | 13343383 | A | 0   | 0      | G |
| 5 | BICF2P727149           | 13351975 | 0 | 0   | 0      | G |
| 5 | BICF2P950203           | 13365755 | A | 0   | 0      | C |
| 5 | BICF2P791607           | 13384368 | 0 | 0   | 0      | A |
| 5 | BICF2P684744           | 13402532 | 0 | 0   | 0      | A |
| 5 | BICF2P943542           | 13419838 | 0 | 0   | 0      | C |
| 5 | BICF2P1151846          | 13497556 | C | 0   | 0      | A |
| 5 | BICF2P413830           | 13516566 | A | 0.5 | 0.2857 | G |
| 5 | BICF2P850932           | 13544403 | A | 0.5 | 0.7143 | G |
| 5 | BICF2P444717           | 13552002 | G | 0.5 | 0.5    | A |
| 5 | BICF2P1024144          | 13566348 | A | 0   | 0      | T |



|   |                        |          |   |     |        |   |
|---|------------------------|----------|---|-----|--------|---|
| 5 | BICF2P408893           | 13577694 | G | 0   | 0      | A |
| 5 | BICF2P152160           | 13591464 | G | 0.5 | 0.5    | C |
| 5 | BICF2P162841           | 13595727 | 0 | 0   | 0      | A |
| 5 | BICF2P1138078          | 13605079 | A | 0   | 0      | C |
| 5 | BICF2S23015885         | 13637079 | A | 0.5 | 0.2857 | G |
| 5 | BICF2P550709           | 13647308 | 0 | 0   | 0      | A |
| 5 | BICF2S23216861         | 13665979 | A | 0   | 0      | G |
| 5 | BICF2S23648538         | 13681280 | A | 0   | 0      | G |
| 5 | BICF2P665240           | 13701845 | A | 0   | 0      | G |
| 5 | BICF2P1185446          | 13720366 | A | 0   | 0      | G |
| 5 | BICF2P849943           | 13723482 | A | 0   | 0      | C |
| 5 | BICF2P316822           | 13740736 | A | 0   | 0      | G |
| 5 | BICF2P457106           | 13746466 | A | 0.5 | 0.5    | G |
| 5 | BICF2P467965           | 13755478 | A | 1   | 1      | G |
| 5 | BICF2P869857           | 13767480 | A | 0   | 0      | G |
| 5 | BICF2P1100948          | 13779820 | G | 0.5 | 0.5    | A |
| 5 | BICF2P806481           | 13794715 | 0 | 0   | 0      | G |
| 5 | BICF2P901531           | 13801889 | G | 0   | 0      | A |
| 5 | BICF2P596467           | 13816803 | A | 0   | 0      | G |
| 5 | BICF2P273659           | 13833281 | G | 0   | 0      | A |
| 5 | BICF2P512691           | 13836895 | G | 0   | 0      | A |
| 5 | BICF2P868516           | 13846175 | G | 0   | 0      | A |
| 5 | BICF2P1199176          | 13868942 | G | 0   | 0.2143 | A |
| 5 | BICF2P1199173          | 13869376 | G | 0   | 0.2143 | A |
| 5 | BICF2P556777           | 13890378 | G | 0.5 | 0.2857 | A |
| 5 | BICF2S23218797         | 13894798 | A | 0.5 | 0.2857 | G |
| 5 | BICF2P1212200          | 13903817 | A | 1   | 0.7857 | G |
| 5 | BICF2S23429011         | 13920211 | G | 0   | 0.2143 | A |
| 5 | BICF2S23029677         | 13929201 | C | 0   | 0.2143 | A |
| 5 | BICF2P964216           | 13939240 | G | 0   | 0.2143 | A |
| 5 | BICF2P818584           | 13954764 | G | 1   | 0.7857 | A |
| 5 | BICF2P916601           | 13966262 | A | 0   | 0      | G |
| 5 | BICF2P99078            | 13980665 | A | 0.5 | 0.2857 | T |
| 5 | BICF2P2784             | 13990533 | A | 0.5 | 0.2857 | C |
| 5 | BICF2P619703           | 13999150 | A | 0.5 | 0.2857 | C |
| 5 | TIGRP2P69477_rs8667274 | 14025020 | 0 | 0   | 0      | C |
| 5 | BICF2P137560           | 14038114 | A | 0   | 0      | G |
| 5 | BICF2P241141           | 14042889 | A | 0.5 | 0.2857 | G |
| 5 | BICF2P492967           | 14055101 | A | 0.5 | 0.5    | G |
| 5 | BICF2S23612390         | 14076313 | A | 0   | 0      | C |
| 5 | BICF2S2329967          | 14107488 | A | 1   | 1      | G |
| 5 | BICF2P1041476          | 14121823 | A | 0   | 0      | G |
| 5 | BICF2P1044813          | 14131105 | A | 0   | 0      | C |
| 5 | BICF2P567274           | 14133880 | G | 0.5 | 0.2857 | A |
| 5 | BICF2S23230191         | 14153105 | A | 0.5 | 0.5    | G |
| 5 | BICF2P25397            | 14159270 | A | 0.5 | 0.2857 | G |
| 5 | BICF2P241038           | 14171132 | A | 0.5 | 0.2857 | C |

|   |                        |          |   |     |        |   |
|---|------------------------|----------|---|-----|--------|---|
| 5 | BICF2P582449           | 14184795 | C | 1   | 0.7857 | A |
| 5 | BICF2P1157823          | 14239736 | A | 0   | 0.2143 | G |
| 5 | BICF2P1157824          | 14239872 | G | 1   | 0.7857 | A |
| 5 | BICF2P648926           | 14251181 | A | 1   | 0.7857 | G |
| 5 | BICF2P757684           | 14260132 | G | 0.5 | 0.5    | A |
| 5 | BICF2P532123           | 14275831 | A | 0   | 0.2143 | G |
| 5 | BICF2P139494           | 14287747 | T | 0   | 0.2143 | A |
| 5 | BICF2P589              | 14340394 | A | 0   | 0.2143 | G |
| 5 | TIGRP2P69493_rs8575791 | 14354256 | 0 | 0   | 0      | G |
| 5 | BICF2P592117           | 14371373 | G | 0.5 | 0.2857 | A |
| 5 | BICF2P496521           | 14377816 | G | 1   | 0.7857 | A |
| 5 | BICF2P1033376          | 14389229 | C | 0   | 0      | A |
| 5 | BICF2P962958           | 14400316 | 0 | 0   | 0      | A |
| 5 | BICF2S23142293         | 14416517 | G | 0.5 | 0.2857 | C |
| 5 | BICF2S23259203         | 14423750 | A | 0.5 | 0.5    | C |
| 5 | BICF2P1031342          | 14439940 | A | 0   | 0.4286 | G |
| 5 | BICF2S235436           | 14444900 | A | 0   | 0.4286 | G |
| 5 | BICF2S23524450         | 14459436 | A | 1   | 0.5714 | G |
| 5 | BICF2P581323           | 14469835 | C | 1   | 0.5714 | A |
| 5 | BICF2S23624056         | 14488048 | A | 0   | 0      | C |
| 5 | BICF2P1347753          | 14503797 | G | 0.5 | 0.2857 | A |
| 5 | BICF2P970354           | 14514784 | G | 0   | 0.2143 | A |
| 5 | BICF2P1058242          | 14545095 | 0 | 0   | 0      | G |
| 5 | BICF2S22918177         | 14554811 | G | 0.5 | 0.5    | A |
| 5 | BICF2P1003588          | 14586210 | A | 0   | 0.2143 | G |
| 5 | BICF2P480962           | 14595370 | G | 0   | 0.2143 | A |
| 5 | BICF2S23030198         | 14612489 | G | 1   | 0.7857 | A |
| 5 | BICF2S23331160         | 14619729 | A | 0   | 0.4286 | G |
| 5 | BICF2P1005050          | 14639021 | G | 0.5 | 0.2857 | A |
| 5 | BICF2P1272546          | 14642424 | A | 0   | 0      | G |
| 5 | BICF2P1093029          | 14651301 | A | 0   | 0      | C |
| 5 | BICF2P1327219          | 14666146 | A | 0   | 0      | C |
| 5 | BICF2S23617243         | 14689681 | G | 0.5 | 0.5    | A |
| 5 | BICF2S23419564         | 14699979 | A | 0.5 | 0.2857 | G |
| 5 | BICF2P114010           | 14720253 | 0 | 0   | 0      | C |
| 5 | BICF2S23535303         | 14740098 | A | 0   | 0.2143 | G |
| 5 | BICF2P736188           | 14748527 | 0 | 0   | 0      | T |
| 5 | BICF2S23520119         | 14759439 | G | 0   | 0.2143 | A |
| 5 | G326f32S322            | 14786078 | A | 0   | 0      | G |
| 5 | G327f27S309            | 14830219 | 0 | 0   | 0      | C |
| 5 | BICF2S23642432         | 14853533 | G | 0   | 0      | A |
| 5 | BICF2P1353635          | 14876354 | 0 | 0   | 0      | G |
| 5 | BICF2P924735           | 14888727 | 0 | 0   | 0      | A |
| 5 | BICF2S23482            | 14902056 | A | 0   | 0      | C |
| 5 | BICF2S23533437         | 14927242 | A | 1   | 1      | G |
| 5 | BICF2P482141           | 14952768 | C | 0   | 0      | A |
| 5 | BICF2P607717           | 14967324 | A | 1   | 1      | G |

|   |                        |          |   |     |        |   |
|---|------------------------|----------|---|-----|--------|---|
| 5 | BICF2P1116982          | 14977997 | G | 0   | 0      | A |
| 5 | BICF2S23238674         | 14999278 | A | 0.5 | 0.2857 | G |
| 5 | BICF2P645758           | 15006237 | A | 0   | 0.2143 | G |
| 5 | BICF2P189890           | 15009903 | G | 0   | 0      | A |
| 5 | BICF2S23619875         | 15023115 | A | 0.5 | 0.2857 | G |
| 5 | BICF2S23013685         | 15041043 | 0 | 0   | 0      | G |
| 5 | BICF2P91661            | 15051153 | A | 0   | 0.2143 | G |
| 5 | BICF2P819174           | 15062440 | G | 0.5 | 0.2857 | A |
| 5 | BICF2P9713             | 15067750 | A | 0.5 | 0.7143 | G |
| 5 | BICF2S23112461         | 15086259 | C | 0.5 | 0.2857 | A |
| 5 | BICF2P162666           | 15104598 | G | 0   | 0      | A |
| 5 | BICF2P634673           | 15118130 | C | 0   | 0      | A |
| 5 | BICF2P1366853          | 15123506 | A | 0   | 0      | C |
| 5 | BICF2P651107           | 15148707 | G | 0   | 0      | C |
| 5 | BICF2P783447           | 15158075 | A | 0   | 0      | G |
| 5 | BICF2P146232           | 15169211 | G | 0   | 0      | A |
| 5 | BICF2P930440           | 15181741 | C | 0   | 0      | A |
| 5 | BICF2P1239880          | 15191694 | A | 1   | 1      | G |
| 5 | BICF2P1014123          | 15220105 | G | 1   | 1      | A |
| 5 | BICF2P1413236          | 15233763 | A | 1   | 1      | C |
| 5 | BICF2P1413235          | 15234054 | G | 1   | 1      | A |
| 5 | BICF2P170792           | 15243369 | A | 0   | 0      | C |
| 5 | BICF2P775251           | 15254166 | G | 0   | 0      | A |
| 5 | BICF2S23746532         | 15264066 | G | 1   | 1      | A |
| 5 | BICF2P764765           | 15273223 | G | 0   | 0      | A |
| 5 | BICF2P1418275          | 15292575 | C | 0.5 | 0.7143 | A |
| 5 | BICF2P632662           | 15303262 | G | 0   | 0.2143 | A |
| 5 | BICF2P183540           | 15323098 | G | 0   | 0      | A |
| 5 | BICF2P1162557          | 15333462 | G | 0.5 | 0.5    | A |
| 5 | BICF2P987262           | 15347498 | G | 0.5 | 0.5    | A |
| 5 | TIGRP2P69505_rs8566039 | 15356597 | 0 | 0   | 0      | G |
| 5 | BICF2S23538747         | 15391207 | A | 0.5 | 0.5    | G |
| 5 | BICF2S23538670         | 15395179 | A | 0.5 | 0.5    | C |
| 5 | BICF2P179781           | 15400072 | G | 0   | 0      | A |
| 5 | BICF2P1061302          | 15413152 | A | 0   | 0      | G |
| 5 | BICF2S23517126         | 15423382 | G | 0   | 0      | A |
| 5 | BICF2S23218055         | 15433708 | G | 0   | 0      | A |
| 5 | BICF2P680751           | 15448667 | C | 0   | 0.2143 | G |
| 5 | BICF2S23125549         | 15466604 | A | 0.5 | 0.5    | C |
| 5 | BICF2P386284           | 15468372 | 0 | 0   | 0      | C |
| 5 | BICF2P452627           | 15488541 | 0 | 0   | 0      | C |
| 5 | BICF2S23619618         | 15491250 | G | 1   | 0.5714 | A |
| 5 | BICF2P886233           | 15503336 | A | 0   | 0.2143 | G |
| 5 | BICF2P458557           | 15519936 | G | 0.5 | 0.5    | A |
| 5 | BICF2S23356373         | 15525552 | G | 0.5 | 0.2857 | A |
| 5 | BICF2S23524220         | 15543347 | G | 0   | 0      | A |
| 5 | BICF2P928313           | 15554569 | A | 0   | 0      | G |

|   |                |          |   |     |        |   |
|---|----------------|----------|---|-----|--------|---|
| 5 | BICF2P630915   | 15567990 | A | 0.5 | 0.2857 | G |
| 5 | BICF2S23741230 | 15572077 | A | 0   | 0      | G |
| 5 | BICF2P723782   | 15590020 | A | 0   | 0      | G |
| 5 | BICF2P699194   | 15597996 | A | 0   | 0.2143 | G |
| 5 | BICF2S23721264 | 15612535 | A | 1   | 0.7857 | G |
| 5 | BICF2P1233780  | 15627536 | A | 0   | 0      | G |
| 5 | BICF2S23617616 | 15638016 | C | 0.5 | 0.5    | A |
| 5 | BICF2P185733   | 15642829 | A | 0   | 0.2143 | G |
| 5 | BICF2P611465   | 15654192 | A | 0.5 | 0.7143 | G |
| 5 | BICF2P611464   | 15654379 | G | 0.5 | 0.7143 | A |
| 5 | BICF2S2294672  | 15664891 | A | 1   | 0.7857 | G |
| 5 | BICF2P798692   | 15681298 | A | 0.5 | 0.5    | G |
| 5 | BICF2P812671   | 15688456 | A | 0.5 | 0.2857 | G |
| 5 | BICF2P40856    | 15698504 | A | 0   | 0      | G |
| 5 | BICF2P158702   | 15712481 | A | 0.5 | 0.7143 | G |
| 5 | BICF2P473053   | 15726242 | A | 1   | 0.7857 | C |
| 5 | BICF2S23742785 | 15740293 | G | 0   | 0      | A |
| 5 | BICF2P581302   | 15754734 | G | 0   | 0.4286 | A |
| 5 | BICF2S23036420 | 15755640 | A | 1   | 0.5714 | G |
| 5 | BICF2S23054630 | 15776734 | A | 0   | 0      | C |
| 5 | BICF2S23030135 | 15798741 | G | 0.5 | 0.5    | A |
| 5 | BICF2S22933536 | 15819129 | G | 0.5 | 0.5    | A |
| 5 | BICF2P226495   | 15831194 | G | 0   | 0      | A |
| 5 | BICF2S2329683  | 15842557 | C | 0.5 | 0.2857 | A |
| 5 | BICF2S23249465 | 15877137 | A | 0   | 0      | C |
| 5 | BICF2S23349696 | 15893558 | G | 0.5 | 0.5    | A |
| 5 | BICF2P714824   | 15907438 | A | 0.5 | 0.5    | G |
| 5 | BICF2P714822   | 15907601 | A | 0   | 0.2143 | G |
| 5 | BICF2P1132921  | 15920920 | A | 0   | 0.2143 | C |
| 5 | BICF2P103563   | 15936995 | A | 1   | 0.7857 | G |
| 5 | BICF2P535266   | 15942976 | 0 | 0   | 0      | C |
| 5 | BICF2S2305764  | 15971748 | C | 1   | 1      | G |
| 5 | BICF2S2308953  | 15993903 | A | 0   | 0      | G |
| 5 | BICF2S23218924 | 16001655 | C | 0.5 | 0.5    | A |
| 5 | BICF2P249942   | 16009916 | 0 | 0   | 0      | T |
| 5 | BICF2P1309564  | 16025307 | 0 | 0   | 0      | C |
| 5 | BICF2P1085959  | 16043319 | G | 0   | 0.2143 | C |
| 5 | BICF2P871146   | 16071170 | A | 0   | 0.4286 | G |
| 5 | BICF2P1194727  | 16085937 | G | 0.5 | 0.7143 | A |
| 5 | BICF2P381887   | 16093715 | A | 0.5 | 0.5    | G |
| 5 | BICF2P381179   | 16108115 | G | 0   | 0      | A |
| 5 | BICF2P968528   | 16114280 | A | 0.5 | 0.5    | G |
| 5 | BICF2S2312301  | 16124082 | 0 | 0   | 0      | T |
| 5 | BICF2P1248827  | 16145308 | A | 0.5 | 0.5    | G |
| 5 | BICF2S23149838 | 16152956 | G | 1   | 0.7857 | A |
| 5 | BICF2P1074015  | 16164136 | G | 0   | 0      | A |
| 5 | BICF2S23519155 | 16176369 | A | 0.5 | 0.2857 | G |

|   |                        |          |   |     |        |   |
|---|------------------------|----------|---|-----|--------|---|
| 5 | BICF2P217390           | 16188647 | A | 0   | 0      | G |
| 5 | BICF2P334044           | 16188961 | A | 0   | 0      | G |
| 5 | BICF2P226781           | 16207910 | G | 0   | 0      | A |
| 5 | BICF2P759597           | 16217217 | A | 0   | 0.2143 | G |
| 5 | BICF2P674329           | 16227231 | A | 0   | 0.2143 | G |
| 5 | BICF2S2456305          | 16252559 | A | 0.5 | 0.2857 | G |
| 5 | BICF2P316282           | 16260762 | A | 0   | 0      | G |
| 5 | BICF2P1314557          | 16270556 | G | 0.5 | 0.2857 | A |
| 5 | BICF2P222913           | 16279181 | G | 1   | 0.7857 | A |
| 5 | BICF2P956309           | 16288151 | G | 0   | 0      | C |
| 5 | BICF2P1146563          | 16306323 | G | 0   | 0.2143 | A |
| 5 | BICF2P1022032          | 16312040 | A | 0   | 0      | C |
| 5 | BICF2P1464282          | 16331678 | 0 | 0   | 0      | G |
| 5 | BICF2P1206671          | 16341673 | A | 1   | 0.5714 | G |
| 5 | BICF2P747510           | 16356561 | G | 0   | 0.2143 | A |
| 5 | BICF2S23214056         | 16370176 | G | 0.5 | 0.5    | A |
| 5 | BICF2P206682           | 16370289 | T | 0.5 | 0.5    | A |
| 5 | BICF2P1317432          | 16377676 | A | 0.5 | 0.7143 | C |
| 5 | BICF2S2351279          | 16392135 | G | 0.5 | 0.5    | A |
| 5 | BICF2S23256937         | 16406662 | A | 0   | 0.1667 | G |
| 5 | BICF2S23716181         | 16421253 | C | 0   | 0.2143 | A |
| 5 | BICF2S22924708         | 16422891 | A | 0   | 0.2143 | G |
| 5 | BICF2P127170           | 16440753 | A | 0.5 | 0.2857 | G |
| 5 | BICF2P1356169          | 16459604 | 0 | 0   | 0      | G |
| 5 | BICF2P305821           | 16477646 | G | 0   | 0      | A |
| 5 | BICF2P273153           | 16490832 | C | 0   | 0.4286 | A |
| 5 | BICF2P640510           | 16497317 | G | 0.5 | 0.7143 | A |
| 5 | BICF2P1223830          | 16528977 | G | 0   | 0      | A |
| 5 | BICF2P1061824          | 16544072 | G | 0   | 0      | A |
| 5 | BICF2P151844           | 16550552 | G | 0.5 | 0.2857 | A |
| 5 | BICF2P315940           | 16561832 | A | 0   | 0      | G |
| 5 | BICF2P730019           | 16572475 | G | 0   | 0      | A |
| 5 | BICF2P2606             | 16589251 | A | 0   | 0      | G |
| 5 | BICF2P1319138          | 16599165 | G | 0   | 0      | A |
| 5 | BICF2P330178           | 16606683 | T | 0   | 0      | A |
| 5 | BICF2P359998           | 16621016 | 0 | 0   | 0      | A |
| 5 | BICF2P1119709          | 16630844 | G | 0   | 0      | A |
| 5 | BICF2P1055574          | 16644635 | G | 0   | 0      | A |
| 5 | BICF2P1239233          | 16657564 | G | 0   | 0      | A |
| 5 | BICF2S23653740         | 16669107 | G | 0.5 | 0.2857 | A |
| 5 | BICF2S23545538         | 16705288 | G | 0   | 0      | A |
| 5 | BICF2P661268           | 16717807 | C | 0.5 | 0.7143 | G |
| 5 | BICF2S24512323         | 16720827 | A | 0.5 | 0.7143 | G |
| 5 | TIGRP2P69530_rs8868101 | 16732753 | 0 | 0   | 0      | C |
| 5 | BICF2S23146205         | 16750668 | G | 0.5 | 0.7143 | A |
| 5 | BICF2P1440841          | 16761504 | 0 | 0   | 0      | C |
| 5 | BICF2P481230           | 16775765 | C | 0.5 | 0.7143 | A |

|   |                        |          |   |     |        |   |
|---|------------------------|----------|---|-----|--------|---|
| 5 | BICF2S235419           | 16783540 | A | 0   | 0      | G |
| 5 | BICF2P194511           | 16798879 | G | 0.5 | 0.7143 | A |
| 5 | TIGRP2P69533_rs8898361 | 16807761 | 0 | 0   | 0      | C |
| 5 | BICF2S23439535         | 16822849 | G | 1   | 1      | A |
| 5 | BICF2S2346072          | 16835856 | C | 0   | 0      | G |
| 5 | BICF2S236874           | 16836574 | G | 0   | 0.2143 | A |
| 5 | BICF2P1313806          | 16850124 | G | 0   | 0.4286 | A |
| 5 | BICF2S22940824         | 16864648 | A | 1   | 0.7857 | G |
| 5 | BICF2P455040           | 16873608 | A | 0   | 0.2143 | G |
| 5 | BICF2P455039           | 16874290 | T | 0   | 0.2143 | A |
| 5 | BICF2P521691           | 16885457 | G | 0.5 | 0.5    | A |
| 5 | BICF2P886910           | 16899293 | A | 1   | 1      | T |
| 5 | BICF2S22960029         | 16905090 | A | 0.5 | 0.2857 | G |
| 5 | BICF2S23624113         | 16927071 | A | 1   | 0.7857 | G |
| 5 | BICF2P267777           | 16932906 | A | 0.5 | 0.5    | G |
| 5 | BICF2P848578           | 16935132 | G | 1   | 1      | A |
| 5 | BICF2P426639           | 16945814 | G | 0.5 | 0.2857 | A |
| 5 | TIGRP2P69534_rs9239806 | 16959852 | 0 | 0   | 0      | C |
| 5 | BICF2P1200199          | 16972277 | G | 0   | 0      | A |
| 5 | BICF2P388745           | 16977086 | A | 0   | 0.2143 | G |
| 5 | BICF2P1281216          | 16991371 | G | 0.5 | 0.7143 | A |
| 5 | BICF2S23744535         | 16998129 | A | 0   | 0      | C |
| 5 | BICF2S23636477         | 17019216 | G | 0.5 | 0.2857 | A |
| 5 | BICF2P1006740          | 17026256 | A | 0   | 0.2143 | G |
| 5 | BICF2S23048932         | 17043462 | G | 1   | 0.7857 | A |
| 5 | BICF2P493586           | 17061931 | 0 | 0   | 0      | C |
| 5 | BICF2S2351863          | 17071878 | A | 0   | 0      | G |
| 5 | BICF2P52254            | 17078854 | A | 0.5 | 0.5    | G |
| 5 | BICF2P197711           | 17089516 | A | 0   | 0      | G |
| 5 | BICF2P1326141          | 17103412 | A | 1   | 0.7857 | G |
| 5 | BICF2P1330255          | 17118795 | G | 1   | 0.5714 | A |
| 5 | BICF2P793761           | 17129825 | A | 1   | 0.7857 | C |
| 5 | BICF2P621561           | 17137029 | G | 1   | 0.7857 | A |
| 5 | BICF2P1046359          | 17141178 | G | 1   | 0.7857 | A |
| 5 | BICF2P1164762          | 17148019 | A | 1   | 0.7857 | G |
| 5 | BICF2P641829           | 17167612 | A | 0   | 0      | G |
| 5 | BICF2P473966           | 17170109 | 0 | 0   | 0      | G |
| 5 | BICF2S23626390         | 17188642 | G | 0.5 | 0.2857 | A |
| 5 | BICF2P136548           | 17224618 | G | 0   | 0      | A |
| 5 | BICF2P1338128          | 17232356 | A | 0   | 0.2143 | G |
| 5 | BICF2P496647           | 17238946 | 0 | 0   | 0      | C |
| 5 | BICF2S23060275         | 17257609 | A | 0   | 0      | C |
| 5 | BICF2P1278929          | 17271563 | C | 0   | 0      | A |
| 5 | BICF2P1391941          | 17276013 | A | 0   | 0      | G |
| 5 | BICF2P580925           | 17292710 | A | 0   | 0      | G |
| 5 | BICF2P214288           | 17304555 | 0 | 0   | 0      | G |
| 5 | BICF2P812846           | 17311725 | A | 0   | 0      | G |

|   |                        |          |   |     |        |   |
|---|------------------------|----------|---|-----|--------|---|
| 5 | BICF2P672668           | 17326526 | A | 0   | 0      | G |
| 5 | BICF2P325835           | 17336263 | 0 | 0   | 0      | C |
| 5 | BICF2P1200187          | 17342682 | A | 0   | 0      | G |
| 5 | BICF2P618794           | 17366997 | A | 0   | 0      | G |
| 5 | BICF2P1205465          | 17387751 | A | 0.5 | 0.7143 | C |
| 5 | BICF2P1296120          | 17396330 | A | 0.5 | 0.2857 | G |
| 5 | BICF2P1105129          | 17402256 | G | 0.5 | 0.2857 | A |
| 5 | BICF2S23721939         | 17413749 | A | 1   | 0.5714 | G |
| 5 | BICF2P128112           | 17444526 | A | 0.5 | 0.2857 | G |
| 5 | BICF2S23614209         | 17454091 | A | 0.5 | 0.5    | G |
| 5 | BICF2P291151           | 17462975 | A | 0.5 | 0.2857 | G |
| 5 | BICF2S23012014         | 17468734 | A | 0   | 0.2143 | G |
| 5 | BICF2P979429           | 17484092 | A | 0   | 0.1    | G |
| 5 | BICF2P1287877          | 17495189 | A | 0   | 0.2143 | G |
| 5 | BICF2P328139           | 17508142 | A | 0.5 | 0.5    | G |
| 5 | BICF2P106780           | 17517856 | A | 0   | 0.2143 | G |
| 5 | BICF2P587621           | 17535496 | A | 0   | 0      | G |
| 5 | BICF2P629360           | 17538058 | A | 0   | 0.2143 | G |
| 5 | BICF2S23744802         | 17553588 | A | 0.5 | 0.5    | G |
| 5 | BICF2P435454           | 17571483 | A | 0.5 | 0.5    | G |
| 5 | BICF2P334988           | 17574480 | 0 | 0   | 0      | C |
| 5 | BICF2P743460           | 17590740 | A | 0.5 | 0.5    | C |
| 5 | BICF2S23755153         | 17600443 | G | 0   | 0.2143 | A |
| 5 | BICF2P1317224          | 17629845 | A | 0   | 0.2143 | T |
| 5 | BICF2P509046           | 17651465 | C | 0   | 0.1667 | A |
| 5 | BICF2P877357           | 17663682 | A | 0   | 0.4286 | G |
| 5 | BICF2P1424470          | 17673656 | 0 | 0   | 0      | A |
| 5 | BICF2S23427476         | 17677230 | C | 0   | 0.4286 | G |
| 5 | BICF2P105169           | 17689790 | A | 0   | 0      | G |
| 5 | BICF2S2313713          | 17702510 | A | 0   | 0.4286 | G |
| 5 | BICF2P951758           | 17726057 | G | 0.5 | 0.7143 | A |
| 5 | BICF2P126981           | 17735795 | G | 0.5 | 0.7143 | A |
| 5 | BICF2P659775           | 17737965 | A | 0.5 | 0.2857 | G |
| 5 | BICF2P938162           | 17753602 | 0 | 0   | 0      | C |
| 5 | BICF2P1310512          | 17774478 | A | 1   | 1      | C |
| 5 | BICF2P1310511          | 17775037 | A | 1   | 1      | G |
| 5 | BICF2P646561           | 17786364 | A | 0   | 0      | G |
| 5 | BICF2P570408           | 17796496 | A | 0   | 0      | C |
| 5 | TIGRP2P69542_rs8628467 | 17803774 | 0 | 0   | 0      | C |
| 5 | BICF2P1077898          | 17831850 | G | 0.5 | 0.7143 | A |
| 5 | BICF2P1327161          | 17837490 | A | 0   | 0      | G |
| 5 | BICF2P1327160          | 17837536 | G | 0   | 0      | A |
| 5 | BICF2P1129415          | 17842948 | 0 | 0   | 0      | G |
| 5 | BICF2P213311           | 17852808 | A | 0   | 0.2143 | C |
| 5 | BICF2P831940           | 17861402 | A | 0   | 0.2143 | G |
| 5 | BICF2S2329289          | 17873995 | G | 0.5 | 0.5    | A |
| 5 | BICF2P1342349          | 17888928 | C | 0.5 | 0.5    | A |

|   |                        |          |   |     |        |   |
|---|------------------------|----------|---|-----|--------|---|
| 5 | BICF2P962078           | 17903845 | 0 | 0   | 0      | G |
| 5 | BICF2S23437546         | 17916971 | C | 0   | 0      | G |
| 5 | BICF2S23326269         | 17932186 | A | 0   | 0      | G |
| 5 | BICF2P1236535          | 17947543 | G | 0   | 0      | A |
| 5 | BICF2S2303704          | 17955031 | A | 0   | 0      | G |
| 5 | BICF2P1117258          | 17963578 | C | 0.5 | 0.5    | A |
| 5 | BICF2P712774           | 17978527 | A | 0.5 | 0.7143 | C |
| 5 | BICF2S23732032         | 18022536 | A | 0   | 0      | G |
| 5 | BICF2P461292           | 18062682 | G | 0   | 0      | A |
| 5 | BICF2S23047187         | 18088532 | G | 0.5 | 0.2857 | A |
| 5 | TIGRP2P69577_rs8861600 | 18096047 | A | 0.5 | 0.2857 | G |
| 5 | BICF2P787100           | 18109826 | A | 0   | 0      | G |
| 5 | BICF2P145462           | 18119285 | 0 | 0   | 0      | C |
| 5 | BICF2P1392000          | 18132808 | A | 0.5 | 0.2857 | G |
| 5 | BICF2P987667           | 18145938 | G | 0   | 0.4286 | A |
| 5 | BICF2P1442735          | 18154271 | 0 | 0   | 0      | A |
| 5 | BICF2P725569           | 18166548 | A | 0.5 | 0.2857 | G |
| 5 | BICF2P221416           | 18173728 | G | 0   | 0      | A |
| 5 | BICF2P1357842          | 18184109 | A | 0.5 | 0.2857 | G |
| 5 | BICF2P1056057          | 18196237 | G | 0   | 0      | A |
| 5 | BICF2P331411           | 18211749 | A | 0   | 0      | G |
| 5 | BICF2P661430           | 18216685 | 0 | 0   | 0      | G |
| 5 | BICF2P912454           | 18247735 | 0 | 0   | 0      | G |
| 5 | BICF2P178038           | 18252488 | 0 | 0   | 0      | G |
| 5 | BICF2P1408010          | 18266448 | A | 0   | 0      | C |
| 5 | BICF2P1462644          | 18275054 | 0 | 0   | 0      | A |
| 5 | BICF2S24413919         | 18300453 | G | 0.5 | 0.2857 | A |
| 5 | BICF2S23719163         | 18332836 | A | 0   | 0      | G |
| 5 | BICF2P768656           | 18363924 | 0 | 0   | 0      | G |
| 5 | BICF2P1015227          | 18396335 | G | 0   | 0.4286 | A |
| 5 | BICF2P558375           | 18399624 | G | 0   | 0.4286 | A |
| 5 | BICF2P120708           | 18409048 | A | 0   | 0      | G |
| 5 | BICF2P616630           | 18411649 | 0 | 0   | 0      | A |
| 5 | BICF2P1035511          | 18426858 | 0 | 0   | 0      | A |
| 5 | BICF2S22932080         | 18437791 | G | 0.5 | 0.7143 | A |
| 5 | BICF2P799501           | 18450432 | G | 0   | 0      | A |
| 5 | BICF2S23032018         | 18464789 | A | 0.5 | 0.7143 | G |
| 5 | BICF2P341482           | 18475103 | 0 | 0   | 0      | C |
| 5 | BICF2S23346280         | 18487145 | A | 1   | 0.5833 | C |
| 5 | BICF2S22911048         | 18502362 | G | 1   | 1      | A |
| 5 | BICF2P709864           | 18508143 | A | 0   | 0      | G |
| 5 | BICF2S23114666         | 18517129 | A | 0.5 | 0.7143 | G |
| 5 | BICF2P878980           | 18524144 | G | 0   | 0      | A |
| 5 | BICF2P811629           | 18529567 | A | 0.5 | 0.2857 | C |
| 5 | BICF2P566027           | 18541317 | A | 0   | 0      | G |
| 5 | BICF2P1221960          | 18566090 | G | 0.5 | 0.2857 | A |
| 5 | BICF2S23543303         | 18581678 | A | 0.5 | 0.7143 | G |



|   |                |          |   |     |        |   |
|---|----------------|----------|---|-----|--------|---|
| 5 | BICF2S23048431 | 18589742 | A | 0.5 | 0.7143 | C |
| 5 | BICF2S23338227 | 18600102 | A | 0.5 | 0.7143 | G |
| 5 | BICF2S237373   | 18615374 | A | 0.5 | 0.7143 | G |
| 5 | BICF2S2305882  | 18622992 | G | 0.5 | 0.25   | A |
| 5 | BICF2S23162331 | 18630879 | C | 0   | 0      | A |
| 5 | BICF2P1376065  | 18634442 | A | 0   | 0      | G |
| 5 | BICF2S23232833 | 18634495 | A | 0   | 0      | G |
| 5 | BICF2P531811   | 18644299 | C | 0.5 | 0.2857 | A |
| 5 | BICF2P831765   | 18656130 | 0 | 0   | 0      | G |
| 5 | BICF2S23710878 | 18686327 | A | 0   | 0      | G |
| 5 | BICF2P450511   | 18692734 | A | 0   | 0      | G |
| 5 | BICF2G63029793 | 18700754 | C | NA  | 0      | A |
| 5 | BICF2G63029807 | 18715747 | G | 0   | 0      | A |
| 5 | BICF2G63029823 | 18724955 | A | 0.5 | 0.7143 | G |
| 5 | BICF2S23048653 | 18731576 | C | 0   | 0.4286 | G |
| 5 | BICF2G63029835 | 18748496 | A | 0   | 0      | G |
| 5 | BICF2P1224199  | 18761717 | A | 0   | 0      | G |
| 5 | BICF2G63029880 | 18775291 | A | 0   | 0      | C |
| 5 | BICF2S2355613  | 18791200 | G | 0   | 0      | A |
| 5 | BICF2G63029892 | 18808481 | G | 1   | 0.5714 | A |
| 5 | BICF2S2349130  | 18817112 | C | 0.5 | 0.2857 | G |
| 5 | BICF2G63029903 | 18825609 | C | 0.5 | 0.75   | A |
| 5 | BICF2G63029913 | 18843989 | A | 0   | 0.4    | C |
| 5 | BICF2G63029919 | 18858001 | G | 1   | 0.5714 | A |
| 5 | BICF2G63029920 | 18863288 | G | 0.5 | 0.2857 | A |
| 5 | BICF2G63029924 | 18874733 | G | 0.5 | 0.2857 | A |
| 5 | BICF2S23660104 | 18884697 | G | 1   | 1      | A |
| 5 | BICF2G63029928 | 18894656 | 0 | 0   | 0      | G |
| 5 | BICF2G63029934 | 18926870 | A | 0   | 0      | G |
| 5 | BICF2G63029938 | 18931795 | C | 1   | 1      | A |
| 5 | BICF2P230310   | 18947901 | G | 0.5 | 0.7143 | A |
| 5 | BICF2P700065   | 18959034 | G | 0.5 | 0.2857 | A |
| 5 | BICF2P920767   | 18964057 | A | 0.5 | 0.7143 | T |
| 5 | BICF2P392914   | 18967456 | G | 0.5 | 0.2857 | A |
| 5 | BICF2S23029725 | 18972939 | A | 0   | 0      | G |
| 5 | BICF2P1201179  | 18978515 | G | 0.5 | 0.7143 | A |
| 5 | BICF2G63029965 | 18991838 | A | 0.5 | 0.2857 | C |
| 5 | BICF2G63029976 | 19001066 | G | 1   | 1      | A |
| 5 | BICF2S24116226 | 19016878 | G | 0.5 | 0.7143 | A |
| 5 | BICF2G63029995 | 19024283 | A | 0   | 0      | G |
| 5 | BICF2G63029999 | 19034368 | C | 0   | 0.4286 | A |
| 5 | BICF2G63030014 | 19047216 | A | 0.5 | 0.7143 | G |
| 5 | BICF2G63030039 | 19057555 | A | 0.5 | 0.7143 | G |
| 5 | BICF2P346011   | 19075972 | G | 0   | 0      | C |
| 5 | BICF2P1057771  | 19078881 | A | 0.5 | 0.7143 | G |
| 5 | BICF2P46619    | 19090293 | G | 0   | 0      | A |
| 5 | BICF2P803240   | 19104994 | A | 0   | 0      | G |

|   |                |          |   |     |        |   |
|---|----------------|----------|---|-----|--------|---|
| 5 | BICF2G63030080 | 19125370 | A | 0.5 | 0.2857 | G |
| 5 | BICF2G63030101 | 19142824 | A | 0   | 0      | G |
| 5 | BICF2P234679   | 19151059 | A | 0   | 0      | G |
| 5 | BICF2G63030142 | 19161617 | A | 0   | 0      | G |
| 5 | BICF2G63030163 | 19170520 | G | 0.5 | 0.2857 | A |
| 5 | BICF2P215337   | 19184700 | G | 0.5 | 0.2857 | A |
| 5 | BICF2G63030206 | 19195420 | A | 0   | 0      | G |
| 5 | BICF2G63030222 | 19206382 | C | 1   | 0.5714 | G |
| 5 | BICF2G63030243 | 19227253 | G | 0   | 0      | A |
| 5 | BICF2P1408805  | 19233830 | G | 1   | 0.5714 | A |
| 5 | BICF2P538198   | 19242989 | A | 0   | 0      | G |
| 5 | BICF2G63030274 | 19254463 | G | 1   | 0.5714 | A |
| 5 | BICF2P652567   | 19263931 | A | 0.5 | 0.2857 | G |
| 5 | BICF2S23651202 | 19266033 | G | 0.5 | 0.2857 | A |
| 5 | BICF2P970872   | 19277800 | A | 0.5 | 0.2857 | G |
| 5 | BICF2G63030296 | 19286890 | A | 0.5 | 0.2857 | C |
| 5 | BICF2G63030320 | 19302058 | A | 0   | 0      | G |
| 5 | BICF2P229870   | 19310513 | 0 | 0   | 0      | G |
| 5 | BICF2G63030324 | 19320078 | A | 1   | 0.5714 | G |
| 5 | BICF2G63030346 | 19353890 | A | 1   | 0.5714 | G |
| 5 | BICF2G63030354 | 19369015 | G | 1   | 0.5714 | C |
| 5 | BICF2S2362330  | 19381324 | C | 0   | 0      | A |
| 5 | BICF2S239345   | 19398790 | 0 | 0   | 0      | G |
| 5 | BICF2P810830   | 19408020 | A | 1   | 1      | G |
| 5 | BICF2P935231   | 19420165 | G | 1   | 1      | A |
| 5 | BICF2P466134   | 19433509 | G | 1   | 1      | A |
| 5 | BICF2P796412   | 19436463 | A | 0.5 | 0.7143 | G |
| 5 | BICF2P145304   | 19450700 | 0 | 0   | 0      | A |
| 5 | BICF2P745390   | 19467336 | A | 1   | 0.5714 | G |
| 5 | BICF2P286394   | 19470902 | G | 1   | 0.5714 | A |
| 5 | BICF2P871564   | 19482016 | C | 0   | 0      | A |
| 5 | BICF2P865713   | 19503337 | G | 0.5 | 0.7143 | A |
| 5 | BICF2S23634546 | 19504008 | G | 0.5 | 0.7143 | A |
| 5 | BICF2P576720   | 19526279 | 0 | 0   | 0      | G |
| 5 | BICF2P1298918  | 19529311 | G | 0.5 | 0.7143 | A |
| 5 | BICF2P1145558  | 19553187 | A | 0.5 | 0.7143 | G |
| 5 | BICF2S23739220 | 19570007 | A | 0.5 | 0.7143 | G |
| 5 | BICF2P1060034  | 19578019 | G | 0.5 | 0.7143 | A |
| 5 | BICF2P1144998  | 19596411 | A | 0.5 | 0.7143 | G |
| 5 | BICF2P1239293  | 19616857 | G | 0   | 0      | A |
| 5 | BICF2P695835   | 19619277 | C | 0   | 0      | A |
| 5 | BICF2P271204   | 19630570 | A | 0   | 0      | G |
| 5 | BICF2S23061242 | 19650941 | 0 | 0   | 0      | G |
| 5 | BICF2P244029   | 19660113 | A | 0   | 0      | G |
| 5 | BICF2P234087   | 19672855 | A | 0   | 0      | G |
| 5 | BICF2P614043   | 19682969 | G | 0   | 0      | A |
| 5 | BICF2P931931   | 19690509 | G | 0   | 0.4286 | A |

|   |                |          |   |     |        |   |
|---|----------------|----------|---|-----|--------|---|
| 5 | BICF2P555849   | 19700697 | G | 0   | 0      | A |
| 5 | BICF2P900569   | 19717430 | G | 0   | 0.4286 | A |
| 5 | BICF2S23149319 | 19723215 | A | 0   | 0.4286 | G |
| 5 | BICF2P1392272  | 19734361 | A | 0.5 | 0.2857 | G |
| 5 | BICF2S23234348 | 19750323 | A | 0   | 0      | C |
| 5 | BICF2P140503   | 19759159 | G | 1   | 1      | A |
| 5 | BICF2S23546397 | 19769451 | G | 0   | 0      | A |
| 5 | BICF2P802193   | 19789089 | 0 | 0   | 0      | G |
| 5 | G328f32S18     | 19809379 | G | 0   | 0      | A |
| 5 | BICF2S23057404 | 19836717 | A | 0.5 | 0.2857 | G |
| 5 | BICF2P357640   | 19849654 | 0 | 0   | 0      | G |
| 5 | BICF2S23052900 | 19870685 | G | 0.5 | 0.2857 | A |
| 5 | BICF2P1029295  | 19874676 | G | 0.5 | 0.2857 | A |
| 5 | BICF2S23262    | 19902916 | A | 0   | 0      | G |
| 5 | BICF2S23045280 | 19917259 | A | 0   | 0      | G |
| 5 | BICF2P1503117  | 19940409 | G | 0   | 0      | A |
| 5 | BICF2P536811   | 19944257 | A | 0   | 0.4286 | G |
| 5 | BICF2P235149   | 19954059 | C | 0   | 0.4286 | A |
| 5 | BICF2S23539512 | 19966655 | A | 0   | 0.4286 | G |
| 5 | BICF2P883323   | 19986370 | G | 0   | 0      | A |
| 5 | BICF2S2356054  | 19989193 | A | 0   | 0.4286 | C |
| 5 | BICF2P231227   | 20004706 | A | 0   | 0      | G |
| 5 | BICF2P509473   | 20021892 | A | 0   | 0      | G |
| 5 | BICF2P125401   | 20035966 | G | 0   | 0      | A |
| 5 | BICF2P256085   | 20044972 | 0 | 0   | 0      | C |
| 5 | BICF2P760579   | 20060359 | A | 0.5 | 0.2857 | G |
| 5 | BICF2P847338   | 20068718 | A | 0.5 | 0.2857 | G |
| 5 | BICF2P691547   | 20076176 | A | 0.5 | 0.2857 | G |
| 5 | BICF2P671065   | 20081789 | A | 0.5 | 0.7143 | G |
| 5 | BICF2P402885   | 20092146 | G | 0.5 | 0.2857 | A |
| 5 | BICF2P599310   | 20110578 | A | 0.5 | 0.7143 | G |
| 5 | BICF2S23422587 | 20118948 | A | 0.5 | 0.2857 | G |
| 5 | BICF2S23146714 | 20127171 | C | 0.5 | 0.2857 | A |
| 5 | BICF2P811711   | 20148442 | A | 0   | 0      | C |
| 5 | BICF2P870087   | 20170698 | A | 0.5 | 0.2857 | G |
| 5 | BICF2S23049108 | 20173734 | G | 0.5 | 0.2857 | A |
| 5 | BICF2P948210   | 20193547 | 0 | 0   | 0      | A |
| 5 | BICF2P1193309  | 20198556 | A | 0.5 | 0.2857 | G |
| 5 | BICF2P1171720  | 20216380 | A | 0.5 | 0.2857 | G |
| 5 | BICF2P579011   | 20224862 | A | 0   | 0      | G |
| 5 | BICF2P70399    | 20230718 | A | 0.5 | 0.7143 | G |
| 5 | BICF2S2315603  | 20241615 | 0 | 0   | 0      | G |
| 5 | BICF2P931796   | 20256603 | A | 0.5 | 0.2857 | G |
| 5 | BICF2P1152135  | 20272083 | G | 1   | 1      | A |
| 5 | BICF2P831528   | 20272545 | T | 1   | 0.5714 | A |
| 5 | BICF2P831529   | 20272747 | A | 1   | 0.5714 | G |
| 5 | BICF2P545684   | 20273767 | G | 1   | 1      | A |

|   |                        |          |   |     |        |   |
|---|------------------------|----------|---|-----|--------|---|
| 5 | BICF2P1446277          | 20280908 | A | 0   | 0      | G |
| 5 | BICF2P259747           | 20293309 | A | 0   | 0      | G |
| 5 | BICF2P955060           | 20298211 | A | 0   | 0.4167 | C |
| 5 | BICF2S23145830         | 20307502 | A | 0   | 0.4286 | G |
| 5 | BICF2P1207666          | 20310889 | G | 1   | 0.5714 | A |
| 5 | BICF2P1207667          | 20311521 | A | 0   | 0      | G |
| 5 | BICF2P452427           | 20323798 | A | 0   | 0.4286 | G |
| 5 | BICF2S23526949         | 20338601 | A | 0   | 0      | C |
| 5 | TIGRP2P69613_rs8811156 | 20354869 | 0 | 0   | 0      | G |
| 5 | BICF2S2418044          | 20376058 | 0 | 0   | 0      | C |
| 5 | BICF2S23627287         | 20381986 | 0 | 0   | 0      | C |
| 5 | BICF2S23911685         | 20395797 | G | 0   | 0      | A |
| 5 | BICF2S23658918         | 20398452 | G | 0   | 0      | A |
| 5 | BICF2S2291675          | 20408220 | A | 0.5 | 0.2857 | G |
| 5 | BICF2P549810           | 20415213 | A | 0.5 | 0.2857 | G |
| 5 | BICF2S23646010         | 20430463 | 0 | 0   | 0      | A |
| 5 | BICF2P1358887          | 20440173 | 0 | 0   | 0      | A |
| 5 | BICF2S22958286         | 20447166 | G | 0.5 | 0.7143 | A |
| 5 | BICF2P1158142          | 20481132 | 0 | 0   | 0      | C |
| 5 | BICF2S23136398         | 20488146 | C | 0   | 0      | A |
| 5 | BICF2S23056541         | 20493161 | A | 0   | 0      | G |
| 5 | BICF2P1070127          | 20505973 | 0 | 0   | 0      | G |
| 5 | BICF2P1399588          | 20522614 | A | 0   | 0.4286 | G |
| 5 | BICF2P340918           | 20536061 | A | 1   | 0.5714 | G |
| 5 | BICF2P362878           | 20554896 | 0 | 0   | 0      | G |
| 5 | BICF2S23234452         | 20564351 | A | 1   | 0.5714 | G |
| 5 | TIGRP2P69615_rs8928655 | 20579308 | 0 | 0   | 0      | C |
| 5 | BICF2S2298845          | 20603363 | A | 0   | 0      | G |
| 5 | BICF2P1211673          | 20608729 | A | 0   | 0      | G |
| 5 | BICF2S24415510         | 20611966 | G | 0   | 0      | A |
| 5 | BICF2P1226363          | 20624402 | G | 1   | 0.5714 | C |
| 5 | BICF2P1226360          | 20625590 | A | 1   | 1      | G |
| 5 | BICF2P424906           | 20634364 | A | 1   | 1      | G |
| 5 | BICF2P888612           | 20644874 | C | 0   | 0      | A |
| 5 | BICF2P127019           | 20652288 | G | 0   | 0      | A |
| 5 | BICF2S23241671         | 20655161 | A | 0   | 0      | G |
| 5 | BICF2S23758654         | 20672720 | A | 0   | 0      | G |
| 5 | BICF2P1378682          | 20687184 | A | 0   | 0      | G |
| 5 | BICF2P403755           | 20700018 | A | 0   | 0      | G |
| 5 | BICF2P1210862          | 20715662 | A | 0.5 | 0.7143 | G |
| 5 | BICF2P1457147          | 20723156 | A | 1   | 1      | G |
| 5 | BICF2P1402805          | 20734824 | A | 0.5 | 0.7143 | G |
| 5 | BICF2P1263839          | 20746366 | A | 0   | 0      | G |
| 5 | BICF2P7050             | 20764011 | T | 0   | 0      | A |
| 5 | BICF2P292822           | 20766982 | A | 0   | 0      | G |
| 5 | BICF2P111218           | 20773014 | A | 0.5 | 0.2857 | G |
| 5 | BICF2P81438            | 20793085 | G | 0.5 | 0.2857 | A |

|   |                        |          |   |     |        |   |
|---|------------------------|----------|---|-----|--------|---|
| 5 | BICF2P566020           | 20811822 | C | 0.5 | 0.2857 | G |
| 5 | BICF2P1070674          | 20815150 | G | 0.5 | 0.2857 | A |
| 5 | BICF2S23715907         | 20827332 | A | 0   | 0      | G |
| 5 | BICF2P995795           | 20840652 | A | 0.5 | 0.7143 | G |
| 5 | BICF2P1362489          | 20854094 | A | 0   | 0      | G |
| 5 | BICF2P90309            | 20863350 | A | 0.5 | 0.7143 | G |
| 5 | BICF2P1147840          | 20882278 | A | 0   | 0      | G |
| 5 | BICF2S23615264         | 20889617 | T | 1   | 1      | A |
| 5 | BICF2S23019675         | 20901519 | T | 0   | 0.4286 | A |
| 5 | BICF2S23113315         | 20913544 | A | 0.5 | 0.2857 | C |
| 5 | BICF2S23514695         | 20945925 | G | 1   | 1      | A |
| 5 | BICF2P822798           | 20957596 | C | 0   | 0.4286 | A |
| 5 | BICF2P514215           | 20973407 | G | 0.5 | 0.7143 | A |
| 5 | BICF2P1155828          | 20980899 | A | 0.5 | 0.7143 | G |
| 5 | BICF2P379525           | 20988455 | A | 1   | 0.5714 | G |
| 5 | TIGRP2P69624_rs8975891 | 21003970 | 0 | 0   | 0      | A |
| 5 | BICF2P1224761          | 21023580 | G | 0.5 | 0.2857 | A |
| 5 | BICF2P1311837          | 21052615 | A | 0   | 0      | G |
| 5 | BICF2P37531            | 21067005 | A | 0.5 | 0.2857 | G |
| 5 | BICF2P998466           | 21074952 | G | 1   | 1      | A |
| 5 | BICF2S23016360         | 21088185 | A | 0.5 | 0.7143 | G |
| 5 | BICF2S23319437         | 21100621 | 0 | 0   | 0      | G |
| 5 | BICF2P806011           | 21107905 | G | 0   | 0      | A |
| 5 | BICF2S2379469          | 21121572 | G | 0   | 0.4286 | A |
| 5 | BICF2S22945217         | 21125883 | G | 0   | 0.4286 | A |
| 5 | G329f55S54             | 21153292 | 0 | 0   | 0      | C |
| 5 | BICF2S23531075         | 21179968 | G | 0.5 | 0.2857 | A |
| 5 | BICF2P364029           | 21191040 | A | 0.5 | 0.2857 | C |
| 5 | BICF2S2292315          | 21202898 | G | 0   | 0      | A |
| 5 | BICF2P1468408          | 21210013 | C | 0.5 | 0.2857 | G |
| 5 | BICF2S23260377         | 21225852 | A | 0   | 0      | G |
| 5 | BICF2S23412053         | 21238306 | G | 0.5 | 0.2857 | A |
| 5 | BICF2S23419975         | 21241106 | C | 0.5 | 0.2857 | A |
| 5 | BICF2S23419974         | 21241159 | A | 0.5 | 0.2857 | G |
| 5 | BICF2P3593             | 21253826 | A | 0   | 0      | G |
| 5 | BICF2P764469           | 21263779 | 0 | 0   | 0      | A |
| 5 | BICF2P547456           | 21294613 | A | 0   | 0      | T |
| 5 | BICF2P93679            | 21301218 | 0 | 0   | 0      | A |
| 5 | BICF2P201050           | 21320672 | A | 0.5 | 0.7143 | C |
| 5 | BICF2S2412221          | 21321666 | A | 0   | 0      | G |
| 5 | BICF2S23610734         | 21342784 | G | 0   | 0      | A |
| 5 | BICF2P400390           | 21385934 | A | 0   | 0      | G |
| 5 | BICF2S23054765         | 21390237 | G | 1   | 0.5714 | A |
| 5 | BICF2P899740           | 21419190 | A | 0   | 0.4286 | G |
| 5 | BICF2P250955           | 21421149 | A | 0   | 0      | C |
| 5 | BICF2P77676            | 21435425 | G | 0   | 0      | A |
| 5 | BICF2P77684            | 21436147 | A | 0   | 0      | G |

|   |                        |          |   |     |        |   |
|---|------------------------|----------|---|-----|--------|---|
| 5 | BICF2S23353079         | 21467072 | A | 0   | 0      | G |
| 5 | BICF2S2326462          | 21474045 | A | 1   | 0.5714 | C |
| 5 | BICF2P197830           | 21482096 | 0 | 0   | 0      | G |
| 5 | BICF2P401528           | 21496276 | A | 0   | 0      | G |
| 5 | BICF2P557209           | 21509131 | 0 | 0   | 0      | C |
| 5 | BICF2S23158625         | 21516926 | A | 0.5 | 0.2857 | G |
| 5 | BICF2S23214895         | 21531909 | A | 0   | 0      | G |
| 5 | BICF2P164676           | 21549788 | A | 0   | 0      | G |
| 5 | BICF2P1445904          | 21571520 | G | 0.5 | 0.2857 | C |
| 5 | BICF2P592080           | 21575271 | G | 0.5 | 0.2857 | A |
| 5 | BICF2P722065           | 21598031 | A | 0   | 0      | G |
| 5 | BICF2P1035807          | 21611327 | A | 0   | 0      | C |
| 5 | BICF2P552959           | 21627436 | A | 0   | 0.4286 | C |
| 5 | BICF2P1454022          | 21651436 | A | 0.5 | 0.2857 | G |
| 5 | BICF2P907281           | 21654752 | G | 0   | 0      | A |
| 5 | BICF2P464189           | 21676267 | G | 0   | 0      | A |
| 5 | BICF2P1328959          | 21677097 | A | 0   | 0      | G |
| 5 | BICF2S2441785          | 21709596 | A | 0.5 | 0.2857 | C |
| 5 | BICF2P1107438          | 21712829 | 0 | 0   | 0      | A |
| 5 | BICF2P1144946          | 21731042 | A | 0   | 0      | C |
| 5 | BICF2S23138520         | 21744401 | C | 0.5 | 0.7143 | A |
| 5 | BICF2P263321           | 21750467 | A | 0.5 | 0.2857 | G |
| 5 | BICF2P133802           | 21785799 | A | 0   | 0      | G |
| 5 | BICF2P1332073          | 21793699 | G | 0   | 0      | A |
| 5 | BICF2P646920           | 21836061 | A | 0   | 0      | G |
| 5 | BICF2P136066           | 21845647 | A | 0   | 0      | G |
| 5 | BICF2S231948           | 21891218 | A | 0.5 | 0.7143 | C |
| 5 | BICF2P399317           | 21910544 | A | 0   | 0      | G |
| 5 | BICF2P1103144          | 21927210 | A | 0   | 0      | G |
| 5 | BICF2P312496           | 21931407 | G | 0   | 0      | A |
| 5 | TIGRP2P69639_rs8579595 | 21973334 | 0 | 0   | 0      | A |
| 5 | BICF2P615039           | 21984396 | T | 0   | 0      | A |
| 5 | BICF2P1322636          | 21996131 | A | 0   | 0      | C |
| 5 | BICF2P757061           | 22004465 | A | 0   | 0      | G |
| 5 | BICF2P1266478          | 22012301 | A | 0   | 0      | G |
| 5 | BICF2P689500           | 22026410 | A | 0   | 0      | G |
| 5 | BICF2S23537650         | 22034931 | A | 0   | 0      | G |
| 5 | BICF2P801106           | 22051566 | 0 | 0   | 0      | A |
| 5 | BICF2S23417578         | 22063462 | 0 | 0   | 0      | A |
| 5 | BICF2P147870           | 22080544 | 0 | 0   | 0      | G |
| 5 | BICF2P605094           | 22092076 | A | 0.5 | 0.7143 | G |
| 5 | BICF2P238421           | 22104028 | A | 0.5 | 0.2857 | C |
| 5 | BICF2P238425           | 22104441 | A | 0.5 | 0.2857 | G |
| 5 | BICF2P453352           | 22125698 | G | 0.5 | 0.7143 | A |
| 5 | BICF2P775454           | 22132125 | G | 1   | 1      | A |
| 5 | BICF2P1284063          | 22148829 | G | 0   | 0      | A |
| 5 | BICF2P1189797          | 22149499 | G | 0   | 0      | A |

|   |                        |          |   |     |        |   |
|---|------------------------|----------|---|-----|--------|---|
| 5 | BICF2P1334463          | 22157157 | G | 0.5 | 0.7143 | A |
| 5 | BICF2P261357           | 22167407 | G | 0.5 | 0.7143 | A |
| 5 | BICF2S23238779         | 22174002 | A | 0   | 0      | G |
| 5 | BICF2P747377           | 22193527 | C | 0.5 | 0.2857 | A |
| 5 | BICF2P308219           | 22199430 | A | 0.5 | 0.2857 | G |
| 5 | BICF2S23660065         | 22207512 | C | 0   | 0      | G |
| 5 | TIGRP2P69643_rs8634020 | 22227616 | 0 | 0   | 0      | G |
| 5 | BICF2S23019641         | 22235030 | C | 1   | 1      | A |
| 5 | BICF2P289755           | 22241449 | C | 0.5 | 0.2857 | A |
| 5 | BICF2P388196           | 22260501 | A | 0   | 0.4286 | G |
| 5 | BICF2P1074386          | 22272484 | A | 0.5 | 0.2857 | G |
| 5 | BICF2P803928           | 22276218 | A | 0   | 0      | G |
| 5 | BICF2P247124           | 22296366 | 0 | 0   | 0      | T |
| 5 | BICF2P1316947          | 22307571 | 0 | 0   | 0      | C |
| 5 | BICF2S23738231         | 22314822 | A | 0   | 0      | C |
| 5 | BICF2P568798           | 22326153 | 0 | 0   | 0      | G |
| 5 | BICF2P1252566          | 22333236 | 0 | 0   | 0      | G |
| 5 | BICF2S23125122         | 22350016 | A | 0   | 0      | G |
| 5 | BICF2S23125123         | 22350240 | A | 0.5 | 0.2857 | G |
| 5 | BICF2P1004839          | 22357941 | A | 0.5 | 0.2857 | G |
| 5 | BICF2P408488           | 22369773 | 0 | 0   | 0      | A |
| 5 | BICF2S23535145         | 22382190 | G | 0.5 | 0.2857 | A |
| 5 | BICF2S23447493         | 22451834 | A | 0.5 | 0.2857 | G |
| 5 | BICF2S23047309         | 22480182 | G | 0   | 0      | A |
| 5 | BICF2P1137716          | 22490850 | A | 0   | 0      | G |
| 5 | BICF2P93323            | 22511417 | A | 1   | 1      | G |
| 5 | BICF2S22911439         | 22528127 | A | 1   | 1      | G |
| 5 | BICF2P722352           | 22529080 | A | 1   | 1      | G |
| 5 | BICF2P1443513          | 22547405 | A | 0   | 0      | G |
| 5 | BICF2P658693           | 22551796 | 0 | 0   | 0      | C |
| 5 | BICF2P378795           | 22573520 | A | 0.5 | 0.7143 | G |
| 5 | BICF2P231732           | 22593398 | 0 | 0   | 0      | G |
| 5 | TIGRP2P69652_rs8819407 | 22603487 | 0 | 0   | 0      | A |
| 5 | G331f25S214            | 22631634 | G | 0.5 | 0.2857 | A |
| 5 | TIGRP2P69653_rs9157692 | 22642563 | 0 | 0   | 0      | C |
| 5 | BICF2P1249104          | 22654780 | G | 0.5 | 0.7143 | A |
| 5 | BICF2P1249103          | 22655534 | G | 0.5 | 0.7143 | A |
| 5 | BICF2S23659282         | 22660745 | G | 0.5 | 0.7143 | A |
| 5 | BICF2S23048457         | 22674913 | C | 0   | 0      | G |
| 5 | BICF2S23153363         | 22686458 | A | 1   | 1      | G |
| 5 | BICF2S23727595         | 22699346 | A | 0   | 0      | G |
| 5 | BICF2P532373           | 22704412 | G | 0.5 | 0.2857 | A |
| 5 | BICF2P1359630          | 22714569 | A | 0.5 | 0.2857 | C |
| 5 | BICF2S22912536         | 22731808 | A | 0   | 0      | C |
| 5 | BICF2S23657115         | 22739424 | G | 0.5 | 0.2857 | A |
| 5 | BICF2P889900           | 22748703 | A | 0   | 0      | G |
| 5 | BICF2P548123           | 22759310 | A | 0   | 0      | C |

|   |                        |          |   |     |        |   |
|---|------------------------|----------|---|-----|--------|---|
| 5 | BICF2P905138           | 22775537 | G | 0.5 | 0.2857 | C |
| 5 | BICF2S22964504         | 22782671 | G | 0.5 | 0.2857 | A |
| 5 | BICF2S23126854         | 22798935 | G | 0   | 0.4286 | A |
| 5 | BICF2P406747           | 22814678 | 0 | 0   | 0      | G |
| 5 | BICF2S23119566         | 22821266 | A | 0   | 0      | G |
| 5 | BICF2P251646           | 22838646 | A | 0   | 0      | G |
| 5 | BICF2S23753081         | 22840374 | 0 | 0   | 0      | G |
| 5 | TIGRP2P69655_rs8622836 | 22854608 | 0 | 0   | 0      | G |
| 5 | BICF2P783886           | 22868846 | G | 0.5 | 0.2857 | A |
| 5 | BICF2P573421           | 22875384 | A | 0   | 0      | G |
| 5 | BICF2S2446098          | 22888434 | A | 0   | 0      | C |
| 5 | BICF2P12807            | 22903498 | A | 0   | 0.3333 | G |
| 5 | BICF2P788683           | 22912298 | G | 0   | 0      | A |
| 5 | BICF2P1330944          | 22920343 | A | 0   | 0      | C |
| 5 | BICF2P907815           | 22932032 | G | 0   | 0      | A |
| 5 | BICF2S23054235         | 22955359 | A | 0.5 | 0.2857 | G |
| 5 | BICF2P356602           | 22972716 | A | 0   | 0.4286 | G |
| 5 | BICF2P667205           | 22989124 | A | 0   | 0.4286 | G |
| 5 | BICF2P797660           | 23003467 | G | 0.5 | 0.7143 | A |
| 5 | BICF2S23643068         | 23017584 | A | 0   | 0      | G |
| 5 | BICF2S23643069         | 23017776 | A | 0   | 0      | G |
| 5 | BICF2S23219334         | 23023588 | A | 0   | 0.4286 | T |
| 5 | BICF2S23127387         | 23035558 | A | 0   | 0      | G |
| 5 | BICF2P1343483          | 23049359 | G | 0.5 | 0.7143 | A |
| 5 | BICF2P755652           | 23059691 | 0 | 0   | 0      | C |
| 5 | BICF2S2371950          | 23074197 | 0 | 0   | 0      | G |
| 5 | BICF2P140611           | 23081428 | G | 0   | 0      | A |
| 5 | BICF2S23749664         | 23097271 | A | 0   | 0      | G |
| 5 | BICF2P1357459          | 23106719 | A | 0   | 0      | G |
| 5 | TIGRP2P69658_rs8826937 | 23116213 | 0 | 0   | 0      | G |
| 5 | BICF2P1130497          | 23127274 | 0 | 0   | 0      | G |
| 5 | BICF2S22945346         | 23144612 | G | 0   | 0      | A |
| 5 | BICF2P1083578          | 23149876 | G | 1   | 0.5714 | A |
| 5 | BICF2P434622           | 23161131 | 0 | 0   | 0      | A |
| 5 | BICF2S23248031         | 23189410 | A | 0   | 0      | G |
| 5 | BICF2P1165354          | 23195627 | G | 0   | 0      | A |
| 5 | BICF2S23733495         | 23222971 | 0 | 0   | 0      | C |
| 5 | BICF2P1385917          | 23236599 | G | 0.5 | 0.2857 | A |
| 5 | BICF2P940369           | 23239971 | A | 0   | 0      | G |
| 5 | BICF2P1089638          | 23245692 | A | 0   | 0.4286 | G |
| 5 | BICF2P860677           | 23260631 | G | 1   | 1      | A |
| 5 | BICF2P882260           | 23275068 | G | 0   | 0      | A |
| 5 | BICF2S2314899          | 23287392 | A | 0.5 | 0.2857 | G |
| 5 | BICF2S23522523         | 23287767 | A | 0   | 0      | C |
| 5 | BICF2P1098115          | 23302624 | G | 1   | 1      | A |
| 5 | BICF2S23427480         | 23317716 | A | 1   | 1      | G |
| 5 | BICF2S22939484         | 23328594 | A | 0   | 0      | G |



|   |                |          |   |     |        |   |
|---|----------------|----------|---|-----|--------|---|
| 5 | BICF2P676493   | 23332253 | G | NA  | 0.5    | A |
| 5 | BICF2P112229   | 23333613 | A | 0   | 0      | C |
| 5 | BICF2P1331295  | 23345652 | A | 0   | 0      | G |
| 5 | BICF2S24414248 | 23363696 | 0 | 0   | 0      | A |
| 5 | BICF2P221897   | 23372396 | G | 0   | 0      | A |
| 5 | BICF2S23539360 | 23389930 | A | 0   | 0      | G |
| 5 | BICF2S2305644  | 23392169 | G | 0   | 0      | A |
| 5 | BICF2S2327544  | 23413866 | A | 0   | 0      | G |
| 5 | BICF2P1079949  | 23430337 | G | 1   | 1      | A |
| 5 | BICF2P266869   | 23469938 | A | 0   | 0      | G |
| 5 | BICF2P1184979  | 23491323 | G | 0   | 0      | A |
| 5 | BICF2P1063782  | 23512148 | A | 0   | 0      | G |
| 5 | BICF2P48564    | 23518238 | G | 0   | 0      | A |
| 5 | BICF2S23312123 | 23542528 | A | 1   | 1      | G |
| 5 | BICF2S2325423  | 23568801 | C | 0   | 0.4286 | A |
| 5 | BICF2S23032291 | 23579995 | G | 1   | 0.5714 | A |
| 5 | BICF2S23516216 | 23592502 | G | 0   | 0.4286 | A |
| 5 | BICF2S23346643 | 23613271 | G | 0   | 0.4286 | A |
| 5 | BICF2S23141799 | 23616891 | A | 0   | 0.4286 | G |
| 5 | BICF2S23144358 | 23621134 | C | 1   | 0.5714 | A |
| 5 | BICF2S23151652 | 23658322 | G | 1   | 0.5714 | A |
| 5 | BICF2S23745382 | 23690199 | G | 0   | 0.4286 | A |
| 5 | BICF2P217420   | 23722233 | G | 1   | 1      | A |
| 5 | BICF2P881522   | 23725191 | G | 1   | 1      | A |
| 5 | BICF2P515969   | 23746514 | G | 1   | 1      | C |
| 5 | BICF2P677536   | 23749424 | G | 0   | 0      | A |
| 5 | BICF2P433869   | 23761387 | A | 1   | 0.5714 | G |
| 5 | BICF2S2397392  | 23779852 | A | 0   | 0      | C |
| 5 | BICF2P793925   | 23786655 | 0 | 0   | 0      | A |
| 5 | BICF2P322045   | 23803089 | C | 0   | 0.4286 | A |
| 5 | BICF2P163929   | 23816068 | G | 0   | 0.4286 | A |
| 5 | BICF2P1324622  | 23823986 | G | 0   | 0.4286 | A |
| 5 | BICF2P449445   | 23834099 | A | 0   | 0.4286 | G |
| 5 | BICF2P1294313  | 23845902 | G | 0   | 0.4286 | A |
| 5 | BICF2P637301   | 23853808 | A | 0   | 0.4286 | G |
| 5 | BICF2P1311372  | 23875790 | 0 | 0   | 0      | C |
| 5 | BICF2P682783   | 23902846 | 0 | 0   | 0      | G |
| 5 | BICF2P703677   | 23917114 | G | 0.5 | 1      | A |
| 5 | BICF2P150309   | 23942921 | 0 | 0   | 0      | G |
| 5 | BICF2P158502   | 23975094 | C | 1   | 1      | A |
| 5 | BICF2S23551781 | 23994536 | A | 0   | 0      | G |
| 5 | BICF2P1186540  | 24013358 | 0 | 0   | 0      | A |
| 5 | BICF2S2319358  | 24027799 | A | 0   | 0      | G |
| 5 | BICF2P959468   | 24064707 | C | 1   | 0.5714 | G |
| 5 | BICF2P1076197  | 24082687 | 0 | 0   | 0      | A |
| 5 | BICF2P301328   | 24108517 | A | 1   | 0.5714 | T |
| 5 | BICF2P787224   | 24119541 | 0 | 0   | 0      | A |

|   |                        |          |   |   |        |   |
|---|------------------------|----------|---|---|--------|---|
| 5 | BICF2P623587           | 24133747 | 0 | 0 | 0      | G |
| 5 | BICF2P1380969          | 24142445 | 0 | 0 | 0      | G |
| 5 | BICF2P806412           | 24156174 | 0 | 0 | 0      | G |
| 5 | BICF2P217461           | 24178013 | G | 0 | 0      | C |
| 5 | BICF2P1135026          | 24184498 | A | 0 | 0      | G |
| 5 | BICF2S23240996         | 24193742 | C | 0 | 0      | G |
| 5 | BICF2P1070838          | 24212917 | G | 0 | 0      | C |
| 5 | BICF2P586809           | 24222868 | C | 0 | 0.4286 | A |
| 5 | BICF2P640581           | 24239983 | A | 0 | 0.4286 | G |
| 5 | TIGRP2P69696_rs9188236 | 24253081 | 0 | 0 | 0      | C |
| 5 | TIGRP2P69697_rs9179016 | 24259078 | 0 | 0 | 0      | G |
| 5 | BICF2P35066            | 24267730 | G | 0 | 0.4286 | A |
| 5 | BICF2P274447           | 24283242 | A | 0 | 0      | C |
| 5 | BICF2S2348307          | 24294925 | G | 1 | 1      | C |
| 5 | BICF2P607466           | 24300979 | G | 0 | 0      | A |
| 5 | BICF2P1152227          | 24318504 | A | 0 | 0      | C |
| 5 | BICF2P1330729          | 24326362 | A | 0 | 0      | G |
| 5 | BICF2S23439232         | 24343167 | A | 0 | 0      | G |
| 5 | BICF2P156965           | 24351399 | 0 | 0 | 0      | C |
| 5 | BICF2S22910364         | 24369104 | G | 0 | 0      | A |
| 5 | BICF2P94579            | 24381098 | A | 0 | 0      | G |
| 5 | BICF2P1316563          | 24384478 | C | 0 | 0      | A |
| 5 | BICF2P315042           | 24402486 | C | 0 | 0      | A |
| 5 | BICF2P786205           | 24405207 | C | 0 | 0      | A |
| 5 | BICF2S23415880         | 24418048 | C | 0 | 0      | A |
| 5 | BICF2P296022           | 24448440 | A | 0 | 0      | G |
| 5 | BICF2P154216           | 24452544 | G | 0 | 0      | A |
| 5 | BICF2P315632           | 24467432 | G | 0 | 0      | A |
| 5 | BICF2P424727           | 24489706 | 0 | 0 | 0      | C |
| 5 | BICF2P129258           | 24506467 | G | 0 | 0      | A |
| 5 | BICF2P337183           | 24508094 | G | 1 | 1      | A |
| 5 | BICF2S23153157         | 24521527 | A | 0 | 0      | G |
| 5 | BICF2S23752222         | 24537369 | A | 0 | 0      | G |
| 5 | BICF2S23552348         | 24546493 | A | 0 | 0.4286 | G |
| 5 | BICF2S22963843         | 24561513 | A | 0 | 0.4286 | G |
| 5 | BICF2P817755           | 24599967 | A | 0 | 0      | G |
| 5 | BICF2S24510030         | 24623301 | G | 1 | 0.5714 | A |
| 5 | BICF2S2297318          | 24649418 | G | 0 | 0      | A |
| 5 | TIGRP2P69702_rs9196017 | 24665967 | 0 | 0 | 0      | C |
| 5 | BICF2S23424951         | 24676880 | A | 0 | 0      | G |
| 5 | BICF2P1406281          | 24689306 | 0 | 0 | 0      | A |
| 5 | BICF2S2375030          | 24695172 | A | 0 | 0      | G |
| 5 | BICF2P516386           | 24711502 | 0 | 0 | 0      | A |
| 5 | BICF2S23130350         | 24718977 | G | 1 | 0.5714 | A |
| 5 | BICF2P1203071          | 24725184 | A | 0 | 0      | G |
| 5 | BICF2P304568           | 24739648 | G | 0 | 0      | A |
| 5 | BICF2S23223770         | 24751732 | A | 0 | 0      | G |

|   |                        |          |   |    |        |   |
|---|------------------------|----------|---|----|--------|---|
| 5 | BICF2S23610058         | 24787253 | A | 0  | 0      | G |
| 5 | BICF2S23231858         | 24797063 | A | 0  | 0      | G |
| 5 | BICF2S23631513         | 24805953 | A | 1  | 1      | G |
| 5 | BICF2S23014895         | 24826416 | C | 0  | 0      | A |
| 5 | BICF2S23241688         | 24846280 | A | 0  | 0      | G |
| 5 | BICF2P319831           | 24856569 | 0 | 0  | 0      | A |
| 5 | BICF2P191437           | 24867191 | A | 0  | 0      | G |
| 5 | BICF2S22914812         | 24892966 | A | 1  | 1      | G |
| 5 | BICF2P300662           | 24900060 | G | 1  | 1      | A |
| 5 | BICF2P1498026          | 24914704 | 0 | 0  | 0      | G |
| 5 | BICF2P1292805          | 24923633 | A | 1  | 1      | G |
| 5 | BICF2P669565           | 24939307 | G | 0  | 0      | A |
| 5 | BICF2S2325576          | 24990179 | G | 0  | 0      | A |
| 5 | G332f28S218            | 25011744 | A | 0  | 0      | G |
| 5 | G332f32S99             | 25014577 | A | 0  | 0      | G |
| 5 | BICF2P713885           | 25045841 | G | 0  | 0      | C |
| 5 | BICF2P1395185          | 25050953 | 0 | 0  | 0      | A |
| 5 | BICF2S22946078         | 25061526 | 0 | 0  | 0      | G |
| 5 | BICF2P591807           | 25068324 | 0 | 0  | 0      | G |
| 5 | BICF2P1114638          | 25070596 | 0 | 0  | 0      | A |
| 5 | BICF2P464081           | 25088963 | G | 0  | 0      | A |
| 5 | BICF2P1402492          | 25095918 | 0 | 0  | 0      | G |
| 5 | BICF2P72616            | 25121080 | 0 | 0  | 0      | G |
| 5 | BICF2P1383599          | 25129280 | 0 | 0  | 0      | C |
| 5 | BICF2P365050           | 25140273 | 0 | 0  | 0      | C |
| 5 | BICF2P169208           | 25151865 | 0 | 0  | 0      | G |
| 5 | BICF2P755067           | 25179615 | G | 0  | 0      | A |
| 5 | BICF2P374521           | 25188969 | G | 0  | 0      | A |
| 5 | BICF2P830540           | 25199894 | A | 0  | 0      | G |
| 5 | TIGRP2P69707_rs9164702 | 25218834 | 0 | NA | 0      | C |
| 5 | BICF2P220753           | 25229580 | 0 | 0  | 0      | A |
| 5 | BICF2P904539           | 25233068 | A | 0  | 0      | C |
| 5 | BICF2S23647271         | 25254780 | A | 0  | 0      | T |
| 5 | TIGRP2P69710_rs8782058 | 25272770 | 0 | 0  | 0      | G |
| 5 | G333f39S78             | 25284738 | G | 0  | 0      | A |
| 5 | BICF2P1297399          | 25313838 | G | 0  | 0      | A |
| 5 | BICF2P1422265          | 25341310 | G | 0  | 0      | A |
| 5 | BICF2P64139            | 25364046 | G | 0  | 0      | A |
| 5 | BICF2P564200           | 25379215 | A | 0  | 0      | G |
| 5 | BICF2P771559           | 25391442 | 0 | 0  | 0      | G |
| 5 | BICF2P45748            | 25404785 | 0 | 0  | 0      | A |
| 5 | BICF2S24319495         | 25417355 | G | 0  | 0      | A |
| 5 | G334f43S206            | 25426015 | A | 0  | 0.4286 | G |
| 5 | BICF2P455561           | 25455890 | A | 0  | 0.4286 | C |
| 5 | BICF2P1106352          | 25472493 | G | 0  | 0.4286 | A |
| 5 | BICF2S2293365          | 25481459 | A | 0  | 0.4286 | G |
| 5 | BICF2P102405           | 25489392 | A | 0  | 0.4286 | G |

|   |                        |          |   |   |        |   |
|---|------------------------|----------|---|---|--------|---|
| 5 | BICF2P715624           | 25505776 | 0 | 0 | 0      | A |
| 5 | BICF2S23625274         | 25512583 | A | 0 | 0.4286 | C |
| 5 | TIGRP2P69713_rs8911425 | 25519946 | 0 | 0 | 0      | G |
| 5 | BICF2P298913           | 25537005 | G | 1 | 1      | A |
| 5 | BICF2P899783           | 25552180 | 0 | 0 | 0      | G |
| 5 | BICF2S23647041         | 25563084 | A | 0 | 0      | G |
| 5 | BICF2P1350676          | 25571922 | A | 0 | 0.4    | G |
| 5 | BICF2P262568           | 25594017 | G | 0 | 0.4286 | A |
| 5 | TIGRP2P69715_rs8875346 | 25614782 | 0 | 0 | 0      | G |
| 5 | BICF2P557902           | 25648909 | A | 1 | 0.6    | G |
| 5 | BICF2P779759           | 25651551 | G | 1 | 0.5714 | A |
| 5 | BICF2P329571           | 25675595 | C | 1 | 1      | G |
| 5 | BICF2P1349041          | 25682894 | G | 0 | 0.4286 | A |
| 5 | BICF2P1021602          | 25719154 | A | 0 | 0.4286 | G |
| 5 | BICF2P1196946          | 25727138 | A | 0 | 0.4286 | G |
| 5 | BICF2P801877           | 25738126 | A | 0 | 0.4286 | G |
| 5 | BICF2P872476           | 25750704 | G | 0 | 0      | A |
| 5 | BICF2S24412854         | 25766770 | C | 0 | 0      | G |
| 5 | BICF2S23658554         | 25783030 | G | 0 | 0      | A |
| 5 | BICF2P390378           | 25797086 | A | 0 | 0.4286 | C |
| 5 | BICF2P1104518          | 25808076 | G | 0 | 0.4286 | A |
| 5 | BICF2S23229964         | 25847184 | C | 0 | 0      | A |
| 5 | BICF2S23630284         | 25852550 | G | 0 | 0.4286 | A |
| 5 | BICF2P523710           | 25877691 | A | 0 | 0      | C |
| 5 | BICF2S23014586         | 25892221 | A | 0 | 0      | G |
| 5 | BICF2S23758350         | 25927621 | G | 1 | 1      | A |
| 5 | BICF2P241668           | 25940750 | G | 0 | 0      | A |
| 5 | BICF2P1333682          | 25944479 | G | 0 | 0      | A |
| 5 | BICF2P418238           | 25960472 | A | 0 | 0.4286 | G |
| 5 | BICF2P716998           | 25969285 | A | 0 | 0      | G |
| 5 | BICF2P360913           | 25981453 | C | 0 | 0.4286 | A |
| 5 | BICF2P966417           | 25990649 | G | 1 | 0.5714 | A |
| 5 | BICF2P881601           | 25991661 | G | 1 | 0.5714 | A |
| 5 | BICF2P449137           | 26008722 | G | 1 | 1      | A |
| 5 | BICF2S22958152         | 26026918 | G | 0 | 0      | A |
| 5 | BICF2P1294930          | 26044902 | G | 0 | 0      | C |
| 5 | BICF2S23710390         | 26057417 | C | 0 | 0      | A |
| 5 | BICF2P82143            | 26063661 | G | 1 | 0.5714 | A |
| 5 | BICF2P1207080          | 26080379 | A | 0 | 0      | G |
| 5 | BICF2P1288841          | 26082184 | 0 | 0 | 0      | A |
| 5 | BICF2P1502752          | 26097814 | G | 0 | 0      | A |
| 5 | BICF2P56980            | 26103232 | A | 1 | 1      | G |
| 5 | BICF2S23120818         | 26107153 | G | 0 | 0      | A |
| 5 | BICF2P576246           | 26121840 | 0 | 0 | 0      | G |
| 5 | BICF2S2311767          | 26129976 | A | 0 | 0      | G |
| 5 | BICF2P546213           | 26142906 | C | 0 | 0.4286 | A |
| 5 | BICF2P548780           | 26161828 | G | 0 | 0.4286 | A |

|   |                        |          |   |   |        |   |
|---|------------------------|----------|---|---|--------|---|
| 5 | BICF2S2309025          | 26169039 | A | 0 | 0      | C |
| 5 | BICF2S23412235         | 26195837 | A | 1 | 0.5714 | G |
| 5 | BICF2S23412236         | 26195871 | A | 0 | 0      | C |
| 5 | BICF2P542603           | 26214365 | A | 0 | 0      | G |
| 5 | BICF2P670557           | 26222619 | G | 0 | 0      | C |
| 5 | BICF2P1414192          | 26225852 | A | 0 | 0      | C |
| 5 | BICF2P1070834          | 26248115 | T | 0 | 0      | A |
| 5 | BICF2P417087           | 26263814 | A | 0 | 0      | G |
| 5 | BICF2P617374           | 26270475 | G | 0 | 0      | A |
| 5 | BICF2P1415849          | 26284567 | A | 1 | 0.5714 | G |
| 5 | BICF2P944064           | 26292160 | G | 1 | 0.5714 | A |
| 5 | BICF2S22942870         | 26309746 | G | 0 | 0.4286 | A |
| 5 | BICF2P2785             | 26316708 | G | 0 | 0      | A |
| 5 | BICF2S23311076         | 26329210 | A | 0 | 0      | G |
| 5 | BICF2P717258           | 26344003 | A | 0 | 0      | G |
| 5 | BICF2P576778           | 26356643 | G | 0 | 0      | A |
| 5 | BICF2P304309           | 26365242 | G | 1 | 1      | A |
| 5 | BICF2S2325371          | 26378515 | G | 1 | 1      | A |
| 5 | BICF2P224905           | 26411070 | 0 | 0 | 0      | A |
| 5 | BICF2P800504           | 26441089 | 0 | 0 | 0      | A |
| 5 | BICF2S23239785         | 26451489 | G | 0 | 0.4286 | A |
| 5 | BICF2S23714456         | 26487822 | G | 1 | 0.5714 | A |
| 5 | BICF2S23012314         | 26500899 | A | 0 | 0.4286 | G |
| 5 | BICF2P1427805          | 26509599 | A | 0 | 0      | G |
| 5 | BICF2P1414531          | 26523868 | C | 0 | 0      | A |
| 5 | BICF2S2306878          | 26540825 | A | 0 | 0      | G |
| 5 | BICF2P646477           | 26552524 | G | 1 | 1      | A |
| 5 | BICF2P646482           | 26553040 | A | 1 | 1      | T |
| 5 | BICF2P1448677          | 26559764 | A | 0 | 0      | C |
| 5 | BICF2S23035952         | 26573126 | A | 0 | 0      | G |
| 5 | BICF2P313469           | 26578298 | G | 0 | 0.4286 | A |
| 5 | BICF2P426132           | 26591727 | G | 0 | 0      | A |
| 5 | BICF2P607832           | 26610933 | G | 0 | 0.4286 | A |
| 5 | TIGRP2P69733_rs9034885 | 26615914 | 0 | 0 | 0      | A |
| 5 | BICF2P971848           | 26628665 | G | 0 | 0      | A |
| 5 | BICF2P252633           | 26642061 | A | 1 | 1      | G |
| 5 | BICF2P556436           | 26649847 | A | 0 | 0      | G |
| 5 | BICF2P204076           | 26664226 | A | 0 | 0.4286 | G |
| 5 | BICF2P833272           | 26672843 | A | 0 | 0      | G |
| 5 | BICF2P507262           | 26682308 | A | 0 | 0      | G |
| 5 | BICF2P592586           | 26717482 | A | 0 | 0      | G |
| 5 | BICF2S23314564         | 26728845 | A | 0 | 0.4286 | G |
| 5 | BICF2P248028           | 26742699 | A | 0 | 0      | G |
| 5 | BICF2P580460           | 26753955 | A | 0 | 0      | G |
| 5 | BICF2S2332821          | 26765307 | A | 0 | 0.4286 | G |
| 5 | BICF2P464218           | 26780696 | A | 0 | 0      | G |
| 5 | TIGRP2P69734_rs9224828 | 26787868 | 0 | 0 | 0      | A |

|   |                        |          |   |   |        |   |
|---|------------------------|----------|---|---|--------|---|
| 5 | BICF2P265017           | 26804535 | 0 | 0 | 0      | G |
| 5 | BICF2P251582           | 26845794 | T | 0 | 0.4286 | A |
| 5 | BICF2P1084718          | 26861262 | 0 | 0 | 0      | A |
| 5 | BICF2P252615           | 26885589 | 0 | 0 | 0      | A |
| 5 | BICF2P628029           | 26906493 | A | 0 | 0      | G |
| 5 | BICF2P1182505          | 26921421 | 0 | 0 | 0      | G |
| 5 | BICF2P1182500          | 26923050 | A | 0 | 0      | G |
| 5 | BICF2P1331127          | 26933123 | A | 0 | 0      | G |
| 5 | BICF2P989189           | 26951071 | 0 | 0 | 0      | C |
| 5 | BICF2S23454452         | 26978369 | C | 0 | 0.4286 | A |
| 5 | BICF2S23733931         | 26987340 | C | 0 | 0.4286 | A |
| 5 | BICF2P1463130          | 26998505 | A | 1 | 0.5714 | G |
| 5 | BICF2S23350723         | 27009611 | A | 0 | 0.4286 | G |
| 5 | BICF2P610157           | 27017517 | G | 0 | 0.4286 | A |
| 5 | BICF2P673330           | 27030782 | A | 0 | 0      | G |
| 5 | BICF2P1161390          | 27044231 | A | 0 | 0      | G |
| 5 | BICF2S23249598         | 27062919 | A | 0 | 0      | G |
| 5 | BICF2S23658762         | 27092817 | A | 1 | 0.5714 | G |
| 5 | BICF2P1004327          | 27110391 | A | 0 | 0.4286 | G |
| 5 | BICF2P307070           | 27141362 | A | 0 | 0.3571 | C |
| 5 | BICF2P594847           | 27155428 | 0 | 0 | 0      | A |
| 5 | TIGRP2P69739_rs8820208 | 27173105 | 0 | 0 | 0      | G |
| 5 | BICF2P834292           | 27175796 | A | 1 | 0.6429 | G |
| 5 | BICF2P547035           | 27191176 | G | 1 | 0.6429 | A |
| 5 | BICF2P28601            | 27206322 | G | 1 | 0.6429 | A |
| 5 | BICF2P651744           | 27212539 | G | 1 | 0.6429 | A |
| 5 | BICF2P953991           | 27227210 | A | 1 | 0.6429 | G |
| 5 | BICF2P1142001          | 27237911 | C | 1 | 0.6429 | A |
| 5 | BICF2S22928079         | 27253812 | G | 1 | 0.6429 | A |
| 5 | BICF2P556324           | 27258964 | G | 1 | 0.6667 | A |
| 5 | BICF2P388698           | 27270458 | T | 1 | 0.6429 | A |
| 5 | BICF2P924127           | 27295366 | G | 1 | 0.6429 | A |
| 5 | BICF2P461903           | 27303909 | A | 1 | 0.6429 | C |
| 5 | BICF2P1085876          | 27316610 | G | 1 | 1      | A |
| 5 | BICF2P592421           | 27329336 | A | 0 | 0      | G |
| 5 | TIGRP2P69743_rs8705751 | 27341885 | 0 | 0 | 0      | A |
| 5 | BICF2P255319           | 27349941 | G | 0 | 0      | A |
| 5 | BICF2P612450           | 27363368 | C | 0 | 0      | A |
| 5 | BICF2P225117           | 27371841 | G | 1 | 1      | A |
| 5 | BICF2P559446           | 27384344 | A | 0 | 0      | G |
| 5 | BICF2S23040872         | 27438864 | G | 1 | 0.6429 | A |
| 5 | BICF2P343989           | 27442075 | C | 1 | 0.6429 | G |
| 5 | BICF2P1025859          | 27464519 | 0 | 0 | 0      | A |
| 5 | BICF2P987822           | 27480203 | G | 1 | 0.6429 | A |
| 5 | BICF2P1163306          | 27489154 | G | 1 | 0.6667 | A |
| 5 | BICF2G63030367         | 27501577 | A | 0 | 0      | G |
| 5 | BICF2S23347835         | 27511021 | G | 1 | 0.6429 | A |

|   |                        |          |   |    |        |   |
|---|------------------------|----------|---|----|--------|---|
| 5 | BICF2G63030421         | 27525766 | G | NA | NA     | A |
| 5 | BICF2G63030434         | 27533333 | A | 0  | 0      | C |
| 5 | BICF2G63030458         | 27550040 | A | 0  | 0      | G |
| 5 | BICF2P202847           | 27554151 | A | 0  | 0.3333 | G |
| 5 | BICF2G63030473         | 27566072 | T | 0  | 0      | A |
| 5 | BICF2G63030485         | 27579278 | 0 | 0  | 0      | G |
| 5 | BICF2P431566           | 27594610 | 0 | 0  | 0      | G |
| 5 | BICF2G63030531         | 27609458 | A | 0  | 0      | G |
| 5 | BICF2S23546786         | 27615820 | G | 0  | 0      | A |
| 5 | BICF2G63030558         | 27627477 | A | 1  | 0.6429 | G |
| 5 | BICF2P1354888          | 27638338 | 0 | 0  | 0      | G |
| 5 | BICF2G63030602         | 27647036 | G | 0  | 0      | A |
| 5 | BICF2G63030615         | 27658051 | G | 0  | 0      | A |
| 5 | BICF2G63030657         | 27670399 | G | 0  | 0      | A |
| 5 | BICF2G63030677         | 27684538 | G | 0  | 0      | A |
| 5 | BICF2G63030689         | 27718185 | A | 0  | 0      | G |
| 5 | BICF2G63030696         | 27732913 | A | 0  | 0      | G |
| 5 | BICF2P300693           | 27747565 | A | 0  | 0      | G |
| 5 | BICF2G63030711         | 27760860 | G | 0  | 0.3571 | A |
| 5 | BICF2G63030716         | 27764439 | G | 0  | 0      | A |
| 5 | BICF2G63030723         | 27773825 | A | 0  | 0.3571 | C |
| 5 | BICF2G63030739         | 27785589 | A | 0  | 0.3571 | G |
| 5 | BICF2G63030748         | 27798875 | A | 1  | 0.6429 | G |
| 5 | BICF2S23017403         | 27809810 | A | 0  | 0.3571 | G |
| 5 | TIGRP2P69774_rs9213759 | 27818519 | 0 | 0  | 0      | G |
| 5 | BICF2S23628879         | 27844079 | A | 0  | 0      | G |
| 5 | BICF2S23058247         | 27879633 | A | 1  | 0.6429 | G |
| 5 | G335f29S227            | 27901626 | A | 0  | 0      | G |
| 5 | BICF2P382068           | 27921917 | 0 | 0  | 0      | C |
| 5 | BICF2S22933716         | 27932219 | C | 1  | 0.6429 | A |
| 5 | BICF2S23719564         | 27942118 | A | 0  | 0      | G |
| 5 | BICF2P418753           | 27946859 | G | 0  | 0      | A |
| 5 | BICF2P440874           | 27951377 | G | 1  | 0.6429 | A |
| 5 | BICF2P378499           | 27963748 | A | 0  | 0      | G |
| 5 | BICF2P985188           | 27979293 | A | 0  | 0      | G |
| 5 | BICF2P1424898          | 28000821 | A | 0  | 0      | G |
| 5 | BICF2G63030793         | 28010388 | A | 0  | 0      | T |
| 5 | BICF2P715543           | 28015612 | A | 0  | 0      | C |
| 5 | BICF2G63030813         | 28032072 | G | 0  | 0      | A |
| 5 | BICF2P80306            | 28047509 | G | 1  | 0.6429 | A |
| 5 | BICF2P80300            | 28048558 | A | 1  | 0.6429 | G |
| 5 | BICF2P869599           | 28071198 | C | 1  | 1      | A |
| 5 | BICF2P483742           | 28076927 | G | 1  | 1      | A |
| 5 | BICF2P225518           | 28088205 | C | 1  | 0.6429 | G |
| 5 | BICF2P1302785          | 28095773 | G | 1  | 1      | A |
| 5 | BICF2G63030840         | 28109441 | A | 0  | 0      | G |
| 5 | BICF2P307301           | 28127099 | A | 0  | 0      | G |

|   |                        |          |   |   |        |   |
|---|------------------------|----------|---|---|--------|---|
| 5 | BICF2G63030847         | 28138119 | G | 0 | 0.3571 | A |
| 5 | TIGRP2P69777_rs8972782 | 28140761 | A | 0 | 0      | G |
| 5 | BICF2P309660           | 28162679 | G | 1 | 0.6429 | C |
| 5 | BICF2G63030886         | 28165760 | A | 0 | 0      | G |
| 5 | BICF2G63030897         | 28176445 | C | 0 | 0      | A |
| 5 | BICF2G63030917         | 28190325 | C | 0 | 0      | A |
| 5 | BICF2P1091287          | 28204673 | A | 0 | 0      | G |
| 5 | BICF2G63030940         | 28211906 | O | 0 | 0      | A |
| 5 | BICF2G63030973         | 28230423 | A | 1 | 0.6429 | C |
| 5 | BICF2G63030975         | 28232604 | A | 1 | 0.6429 | C |
| 5 | BICF2G63031012         | 28254379 | T | 1 | 0.6429 | A |
| 5 | BICF2G63031013         | 28256023 | A | 1 | 0.6429 | G |
| 5 | BICF2G63031016         | 28269753 | C | 0 | 0      | A |
| 5 | BICF2G63031055         | 28290219 | O | 0 | 0      | A |
| 5 | BICF2G63031081         | 28313544 | A | 0 | 0      | G |
| 5 | BICF2G63031101         | 28329067 | A | 1 | 0.6429 | G |
| 5 | BICF2P973462           | 28337108 | A | 1 | 0.6429 | G |
| 5 | BICF2P204790           | 28343793 | A | 1 | 0.6429 | G |
| 5 | BICF2G63031118         | 28358571 | A | 0 | 0      | G |
| 5 | BICF2G63031126         | 28374980 | G | 0 | 0      | A |
| 5 | BICF2G63031142         | 28386586 | A | 0 | 0.3571 | G |
| 5 | TIGRP2P69815_rs9065337 | 28399556 | A | 1 | 0.6429 | G |
| 5 | BICF2P677047           | 28414140 | A | 1 | 0.6429 | G |
| 5 | BICF2G63031176         | 28417516 | G | 1 | 1      | A |
| 5 | TIGRP2P69832_rs8987158 | 28432119 | G | 0 | 0.3333 | A |
| 5 | BICF2P348295           | 28445035 | O | 0 | 0      | C |
| 5 | BICF2P1344746          | 28457273 | G | 0 | 0.3571 | A |
| 5 | BICF2P586920           | 28483722 | A | 1 | 0.6429 | G |
| 5 | TIGRP2P69844_rs9142704 | 28494065 | O | 0 | 0      | C |
| 5 | BICF2P1338555          | 28502263 | G | 1 | 0.6429 | A |
| 5 | TIGRP2P69849_rs9120834 | 28514699 | A | 1 | 0.6429 | G |
| 5 | BICF2G63031191         | 28522460 | G | 0 | 0      | A |
| 5 | BICF2G63031205         | 28532781 | A | 0 | 0      | G |
| 5 | BICF2G63031220         | 28545338 | A | 0 | 0      | G |
| 5 | BICF2G63031266         | 28565024 | G | 1 | 0.6667 | A |
| 5 | BICF2P485462           | 28575591 | A | 0 | 0.3    | C |
| 5 | TIGRP2P69870_rs9016534 | 28583308 | G | 0 | 0.3571 | A |
| 5 | BICF2G63031284         | 28593405 | A | 1 | 0.6429 | G |
| 5 | BICF2G63031294         | 28606509 | A | 0 | 0      | C |
| 5 | BICF2S23644595         | 28614825 | G | 1 | 0.6429 | A |
| 5 | BICF2G63031301         | 28630505 | A | 0 | 0      | G |
| 5 | BICF2G63031305         | 28635071 | A | 0 | 0      | C |
| 5 | BICF2G63031322         | 28657373 | A | 0 | 0      | G |
| 5 | BICF2G63031325         | 28659812 | G | 0 | 0.3571 | A |
| 5 | BICF2G63031337         | 28675378 | A | 0 | 0      | G |
| 5 | BICF2G63031349         | 28683028 | G | 0 | 0      | A |
| 5 | BICF2G63031363         | 28694072 | A | 0 | 0      | C |



|   |                        |          |   |     |        |   |
|---|------------------------|----------|---|-----|--------|---|
| 5 | BICF2G63031369         | 28704430 | C | 0   | 0      | A |
| 5 | BICF2G63031429         | 28755240 | G | 0   | 0      | A |
| 5 | BICF2G63031454         | 28766959 | C | 0   | 0      | A |
| 5 | BICF2G63031474         | 28776063 | A | 1   | 1      | T |
| 5 | BICF2S23414114         | 28801341 | A | 0   | 0      | G |
| 5 | BICF2G63031498         | 28826010 | G | 0   | 0      | A |
| 5 | BICF2G63031507         | 28835964 | A | 0   | 0      | G |
| 5 | TIGRP2P69908_rs8806827 | 28843093 | 0 | 0   | 0      | G |
| 5 | BICF2G63031523         | 28854093 | C | 1   | 1      | A |
| 5 | TIGRP2P69919_rs9141849 | 28870199 | A | 0   | 0      | G |
| 5 | BICF2P23629            | 28878227 | C | 0   | 0      | A |
| 5 | BICF2G63031567         | 28889867 | A | 0   | 0      | C |
| 5 | BICF2G63031570         | 28904298 | G | 0   | 0      | A |
| 5 | BICF2G63031573         | 28911103 | A | 0   | 0.3571 | C |
| 5 | BICF2G63031584         | 28928626 | C | 0   | 0.3571 | A |
| 5 | BICF2G63031592         | 28939731 | G | 0   | 0.3571 | A |
| 5 | BICF2G63031611         | 28946687 | C | 0   | 0      | A |
| 5 | BICF2P869775           | 28957026 | A | 0   | 0      | G |
| 5 | BICF2P1109424          | 28978236 | A | 0   | 0      | G |
| 5 | BICF2G63031632         | 28988342 | A | 0   | 0      | C |
| 5 | BICF2G63031643         | 28992412 | G | 0.5 | 0.3571 | A |
| 5 | BICF2G63031655         | 29007870 | G | 0   | 0.3571 | A |
| 5 | BICF2P536829           | 29023899 | G | 0   | 0.3571 | A |
| 5 | BICF2S23020902         | 29037489 | A | 0   | 0      | G |
| 5 | BICF2G63031740         | 29052752 | G | 0   | 0.3571 | A |
| 5 | BICF2P1221170          | 29061354 | C | 0   | 0      | A |
| 5 | BICF2G63031781         | 29080423 | A | 0   | 0      | G |
| 5 | BICF2G63031802         | 29098927 | G | 0   | 0      | A |
| 5 | BICF2G63031830         | 29115024 | A | 0.5 | 0.2857 | G |
| 5 | BICF2G63031835         | 29119914 | G | 0   | 0      | A |
| 5 | BICF2P998739           | 29130431 | C | 0.5 | 0.2857 | G |
| 5 | BICF2G63031871         | 29148725 | A | NA  | 0.25   | G |
| 5 | BICF2G63031880         | 29160733 | T | 0.5 | 0.2857 | A |
| 5 | BICF2G63031894         | 29168364 | A | 0   | 0      | G |
| 5 | BICF2G63031908         | 29180619 | C | 0   | 0      | A |
| 5 | BICF2G63031913         | 29187154 | A | 0.5 | 0.2857 | G |
| 5 | BICF2G63031930         | 29201876 | G | 0   | 0      | A |
| 5 | BICF2P994296           | 29219876 | A | 0   | 0      | G |
| 5 | BICF2P90146            | 29226500 | C | 0   | 0      | A |
| 5 | BICF2G63031937         | 29240705 | A | 0   | 0      | G |
| 5 | BICF2G63031951         | 29248704 | A | 0.5 | 0.3571 | G |
| 5 | BICF2G63031958         | 29257724 | C | 0   | 0      | A |
| 5 | BICF2G63031971         | 29273188 | G | 0   | 0      | A |
| 5 | BICF2G63032001         | 29291802 | A | 0   | 0      | G |
| 5 | BICF2S22950399         | 29304216 | 0 | 0   | 0      | C |
| 5 | BICF2G63032048         | 29314132 | G | 0   | 0.3571 | A |
| 5 | BICF2G63032061         | 29328486 | A | 0.5 | 0.7143 | G |

|   |                        |          |   |     |        |   |
|---|------------------------|----------|---|-----|--------|---|
| 5 | BICF2G63032074         | 29336643 | G | 0   | 0.3571 | A |
| 5 | BICF2G63032093         | 29351324 | G | 0.5 | 0.7143 | A |
| 5 | BICF2G63032105         | 29361503 | A | 0.5 | 0.7143 | G |
| 5 | BICF2S23241306         | 29376767 | C | 0.5 | 0.3571 | A |
| 5 | BICF2S2328244          | 29382982 | A | 1   | 0.6429 | G |
| 5 | BICF2P1087959          | 29396757 | G | 0.5 | 0.2857 | A |
| 5 | BICF2P1087958          | 29397019 | A | 0.5 | 0.2857 | G |
| 5 | BICF2G63032163         | 29409871 | A | 0.5 | 0.3571 | G |
| 5 | BICF2G63032189         | 29421378 | A | 0   | 0      | G |
| 5 | BICF2G63032193         | 29429230 | A | 0.5 | 0.7143 | G |
| 5 | BICF2G63032207         | 29441924 | A | 0   | 0      | G |
| 5 | BICF2S23052973         | 29451949 | A | 0.5 | 0.2857 | C |
| 5 | BICF2S235100           | 29470704 | A | 0   | 0.3571 | C |
| 5 | BICF2G63032241         | 29476582 | A | 1   | 1      | G |
| 5 | BICF2S23222066         | 29488390 | G | 0   | 0      | A |
| 5 | BICF2P844637           | 29499337 | G | 1   | 0.6429 | A |
| 5 | BICF2G63032274         | 29499549 | A | 0   | 0      | G |
| 5 | BICF2G63032279         | 29505059 | G | 1   | 1      | A |
| 5 | BICF2P962297           | 29513666 | A | 1   | 0.6667 | G |
| 5 | BICF2P1115567          | 29521381 | A | 0   | 0.3571 | G |
| 5 | BICF2P1115566          | 29521583 | A | 1   | 0.6429 | T |
| 5 | BICF2G63032318         | 29533153 | G | 0   | 0      | A |
| 5 | BICF2G63032335         | 29547532 | G | 1   | 1      | A |
| 5 | BICF2G63032373         | 29580964 | G | 0   | 0      | A |
| 5 | BICF2G63032378         | 29592981 | A | 0   | 0      | G |
| 5 | BICF2G63032382         | 29601500 | A | 0   | 0      | G |
| 5 | TIGRP2P69980_rs8928235 | 29613582 | 0 | 0   | 0      | A |
| 5 | BICF2G63032418         | 29625075 | A | 0.5 | 0.7143 | G |
| 5 | BICF2G63032424         | 29640672 | A | 0.5 | 0.7143 | G |
| 5 | BICF2S23619646         | 29652990 | A | 0   | 0      | G |
| 5 | BICF2G63032434         | 29683178 | G | 0.5 | 0.2857 | A |
| 5 | BICF2G63032466         | 29698842 | C | 0   | 0.3571 | A |
| 5 | BICF2P129808           | 29714885 | A | 0.5 | 0.7143 | G |
| 5 | BICF2G63032495         | 29724894 | G | 0.5 | 0.7143 | A |
| 5 | BICF2G63032501         | 29727799 | A | 0.5 | 0.7143 | G |
| 5 | BICF2G63032519         | 29741123 | G | 0   | 0      | A |
| 5 | BICF2G63032546         | 29753947 | G | 0   | 0.3571 | A |
| 5 | BICF2G63032559         | 29765922 | A | 0   | 0.3571 | G |
| 5 | BICF2S23440474         | 29779607 | G | 0.5 | 0.7143 | A |
| 5 | BICF2S23551885         | 29791715 | G | 0   | 0      | A |
| 5 | BICF2S22929850         | 29796951 | C | 0   | 0      | A |
| 5 | BICF2G63032572         | 29836736 | G | 0.5 | 0.6429 | A |
| 5 | BICF2G63032574         | 29841770 | A | 0   | 0.3571 | G |
| 5 | BICF2G63032576         | 29842652 | G | 0   | 0      | A |
| 5 | BICF2G63032599         | 29855214 | G | 0   | 0      | A |
| 5 | BICF2G63032614         | 29870576 | A | 0   | 0.3571 | G |
| 5 | BICF2G63032671         | 29905336 | A | 1   | 1      | C |

|   |                        |          |   |     |        |   |
|---|------------------------|----------|---|-----|--------|---|
| 5 | BICF2G63032689         | 29911810 | C | 0   | 0.3571 | G |
| 5 | BICF2P905524           | 29932711 | A | 0   | 0.3571 | T |
| 5 | BICF2G63032709         | 29935731 | G | 0.5 | 0.3571 | A |
| 5 | BICF2G63032714         | 29949442 | A | 0   | 0.3571 | C |
| 5 | BICF2G63032728         | 29966471 | G | 1   | 1      | A |
| 5 | BICF2G63032752         | 29974876 | C | 1   | 1      | A |
| 5 | BICF2G63032767         | 29984993 | C | 0   | 0      | A |
| 5 | TIGRP2P69985_rs8533119 | 29994659 | 0 | 0   | 0      | A |
| 5 | BICF2G63032804         | 30004141 | G | 0   | 0      | A |
| 5 | BICF2S23215601         | 30016833 | 0 | 0   | 0      | C |
| 5 | BICF2G63032841         | 30028734 | G | 0.5 | 0.3571 | A |
| 5 | BICF2G63032850         | 30046409 | G | 0.5 | 0.6429 | A |
| 5 | BICF2G63032860         | 30054115 | G | 1   | 1      | A |
| 5 | BICF2G63032870         | 30066572 | A | 0.5 | 0.6429 | G |
| 5 | BICF2G63032873         | 30076577 | A | 0.5 | 0.6429 | G |
| 5 | BICF2G63032887         | 30084993 | A | 1   | 1      | G |
| 5 | BICF2G63032888         | 30085018 | C | 1   | 1      | A |
| 5 | BICF2G63032933         | 30098167 | C | 0.5 | 0.6429 | A |
| 5 | BICF2G63032973         | 30107018 | G | 0.5 | 0.6429 | A |
| 5 | BICF2S22935388         | 30137509 | G | 1   | 1      | A |
| 5 | TIGRP2P69988_rs8806469 | 30157215 | 0 | 0   | 0      | A |
| 5 | BICF2S23061646         | 30172188 | G | 0   | 0      | A |
| 5 | BICF2S23060677         | 30180065 | A | 0.5 | 0.6429 | G |
| 5 | BICF2G63033001         | 30210371 | A | 0   | 0      | G |
| 5 | BICF2G63033003         | 30211671 | T | 0   | 0      | A |
| 5 | BICF2S23726420         | 30229507 | A | 0   | 0      | G |
| 5 | BICF2S23726606         | 30233609 | 0 | 0   | 0      | A |
| 5 | BICF2G63033066         | 30257395 | G | 0   | 0      | A |
| 5 | BICF2S23161211         | 30279817 | C | 0.5 | 0.3571 | A |
| 5 | BICF2S23711187         | 30300619 | A | 0.5 | 0.3571 | G |
| 5 | BICF2G63033082         | 30305812 | 0 | 0   | 0      | G |
| 5 | BICF2G63033098         | 30320304 | A | 0.5 | 0.3571 | G |
| 5 | BICF2G63033117         | 30333342 | A | 0.5 | 0.6429 | C |
| 5 | BICF2G63033153         | 30342614 | G | 0   | 0      | A |
| 5 | BICF2G63033159         | 30352452 | G | 0   | 0      | A |
| 5 | BICF2P333449           | 30362916 | A | 0   | 0      | G |
| 5 | BICF2G63033185         | 30374962 | A | 0   | 0      | G |
| 5 | BICF2G63033203         | 30387234 | A | 0   | 0      | G |
| 5 | BICF2G63033210         | 30396066 | G | 0   | 0      | A |
| 5 | BICF2P1228901          | 30411139 | A | 0   | 0      | G |
| 5 | BICF2G63033237         | 30422600 | G | 0   | 0      | A |
| 5 | BICF2G63033265         | 30438012 | G | 0.5 | 0.3333 | A |
| 5 | BICF2G63033271         | 30441037 | A | 0.5 | 0.3571 | G |
| 5 | BICF2G63033285         | 30448114 | A | 0.5 | 0.6429 | G |
| 5 | BICF2G63033299         | 30452799 | G | 0.5 | 0.3571 | A |
| 5 | BICF2G63033318         | 30466533 | A | 0   | 0      | C |
| 5 | BICF2G63033326         | 30475681 | 0 | 0   | 0      | A |

|   |                |          |   |     |        |   |
|---|----------------|----------|---|-----|--------|---|
| 5 | BICF2P1077938  | 30487079 | A | 0   | 0      | G |
| 5 | BICF2P840637   | 30498497 | A | 0   | 0      | C |
| 5 | BICF2G63033332 | 30512832 | A | 0.5 | 0.3571 | G |
| 5 | BICF2G63033342 | 30522636 | C | 0.5 | 0.3571 | A |
| 5 | BICF2G63033395 | 30535262 | A | 0.5 | 0.6429 | G |
| 5 | BICF2P1469725  | 30537437 | A | 0   | 0      | G |
| 5 | BICF2S23449325 | 30547078 | G | 0.5 | 0.3571 | A |
| 5 | BICF2G63033434 | 30561665 | G | 0   | 0      | A |
| 5 | BICF2G63033470 | 30576872 | G | 0.5 | 0.3571 | A |
| 5 | BICF2G63033477 | 30579521 | G | 1   | 1      | A |
| 5 | BICF2S23136358 | 30591943 | C | 0.5 | 0.3571 | A |
| 5 | BICF2G63033484 | 30601530 | G | 0.5 | 0.3571 | A |
| 5 | BICF2G63033497 | 30621477 | G | 0.5 | 0.3571 | A |
| 5 | BICF2G63033506 | 30626672 | A | 0.5 | 0.6429 | G |
| 5 | BICF2G63033513 | 30637027 | A | 0   | 0      | G |
| 5 | BICF2G63033527 | 30649699 | A | 0.5 | 0.6429 | G |
| 5 | BICF2G63033569 | 30662803 | A | 0.5 | 0.6429 | G |
| 5 | BICF2S23410489 | 30678445 | G | NA  | 0.3571 | A |
| 5 | BICF2P1207789  | 30685627 | A | 0.5 | 0.3571 | G |
| 5 | BICF2G63033582 | 30701936 | G | 1   | 1      | A |
| 5 | BICF2G63033603 | 30716416 | G | 1   | 1      | A |
| 5 | BICF2G63033608 | 30718517 | G | 0   | 0      | A |
| 5 | BICF2P1210032  | 30734633 | A | 0.5 | 0.7143 | G |
| 5 | BICF2P158482   | 30742888 | A | 0   | 0      | G |
| 5 | BICF2P1472590  | 30754855 | G | 1   | 0.6429 | A |
| 5 | BICF2G63033621 | 30766517 | G | 0.5 | 0.2857 | A |
| 5 | BICF2S23335615 | 30781554 | A | 0.5 | 0.3571 | G |
| 5 | BICF2G63033627 | 30785799 | G | 0.5 | 0.2857 | A |
| 5 | BICF2G63033640 | 30799553 | G | 0   | 0.3571 | A |
| 5 | BICF2G63033644 | 30809466 | A | 0   | 0      | G |
| 5 | BICF2G63033657 | 30822667 | G | 0   | 0      | A |
| 5 | BICF2G63033670 | 30831938 | A | 0.5 | 0.6429 | G |
| 5 | BICF2S23314481 | 30860617 | A | 0.5 | 0.6429 | G |
| 5 | BICF2P476422   | 30867849 | A | 0   | 0.3571 | G |
| 5 | BICF2G63033741 | 30878045 | A | 0   | 0.3571 | G |
| 5 | BICF2G63033765 | 30889860 | A | 0   | 0      | G |
| 5 | BICF2P624217   | 30900943 | A | 0   | 0      | G |
| 5 | BICF2P406499   | 30913730 | A | 0   | 0      | T |
| 5 | BICF2G63033784 | 30941202 | G | 0.5 | 0.2857 | A |
| 5 | BICF2G63033789 | 30948076 | A | 0.5 | 0.7    | G |
| 5 | BICF2G63033803 | 30951350 | G | 0.5 | 0.6429 | A |
| 5 | BICF2P709220   | 30956204 | G | 0   | 0      | A |
| 5 | BICF2G63033818 | 30958172 | G | 0.5 | 0.3571 | A |
| 5 | BICF2G63033849 | 30977480 | G | 0   | 0.3571 | A |
| 5 | BICF2G63033858 | 30984516 | G | 0   | 0.3571 | A |
| 5 | BICF2G63033865 | 30993290 | A | 0.5 | 0.3571 | G |
| 5 | BICF2G63033883 | 31011976 | 0 | 0   | 0      | A |

|   |                |          |   |     |        |   |
|---|----------------|----------|---|-----|--------|---|
| 5 | BICF2G63033893 | 31023864 | G | 0   | 0      | A |
| 5 | BICF2G63033902 | 31028031 | G | 0   | 0.3571 | A |
| 5 | BICF2G63033903 | 31028244 | A | 0   | 0      | C |
| 5 | BICF2G63033915 | 31039120 | A | 0   | 0      | G |
| 5 | BICF2S23627253 | 31058181 | A | 0   | 0.3571 | G |
| 5 | BICF2G63033930 | 31062046 | A | 1   | 0.6667 | G |
| 5 | BICF2G63033945 | 31071417 | C | 1   | 1      | G |
| 5 | BICF2G63033951 | 31072030 | A | 0.5 | 0.3571 | G |
| 5 | BICF2G63033963 | 31076976 | A | 0   | 0      | G |
| 5 | BICF2G63033971 | 31086787 | G | 1   | 1      | A |
| 5 | BICF2G63033987 | 31097057 | A | 1   | 1      | G |
| 5 | BICF2G63034021 | 31110576 | C | 0.5 | 0.2857 | A |
| 5 | BICF2P1163372  | 31125282 | C | 0   | 0      | A |
| 5 | BICF2G63034037 | 31125456 | A | 1   | 1      | G |
| 5 | BICF2G63034086 | 31138482 | G | 0.5 | 0.7143 | A |
| 5 | BICF2G63034095 | 31141565 | A | 0.5 | 0.7143 | G |
| 5 | BICF2G63034108 | 31147442 | C | 0.5 | 0.7143 | G |
| 5 | BICF2G63034127 | 31153504 | A | 0.5 | 0.7143 | G |
| 5 | BICF2G63034139 | 31168636 | G | 0.5 | 0.7143 | A |
| 5 | BICF2G63034160 | 31177061 | A | 0   | 0      | G |
| 5 | BICF2G63034170 | 31187132 | G | 0   | 0      | A |
| 5 | BICF2S23523475 | 31194466 | G | 0.5 | 0.2857 | A |
| 5 | BICF2G63034179 | 31203884 | A | 1   | 1      | C |
| 5 | BICF2S23148482 | 31213169 | G | 1   | 1      | A |
| 5 | BICF2G63034206 | 31222884 | A | 0   | 0      | G |
| 5 | BICF2G63034222 | 31234383 | C | 0   | 0      | A |
| 5 | BICF2G63034231 | 31246561 | C | 0   | 0      | A |
| 5 | BICF2G63034255 | 31254300 | C | 0   | 0      | A |
| 5 | BICF2G63034293 | 31268440 | G | 0   | 0      | A |
| 5 | BICF2G63034299 | 31273170 | 0 | 0   | 0      | G |
| 5 | BICF2P1408545  | 31278639 | G | 0.5 | 0.7143 | A |
| 5 | BICF2G63034336 | 31280997 | A | 0.5 | 0.7143 | G |
| 5 | BICF2S23517647 | 31310408 | A | 0   | 0      | G |
| 5 | BICF2S23426087 | 31318820 | A | 0   | 0      | G |
| 5 | BICF2G63034379 | 31343141 | A | 0.5 | 0.2857 | G |
| 5 | BICF2G63034383 | 31351106 | 0 | 0   | 0      | G |
| 5 | BICF2P623629   | 31362258 | A | 0.5 | 0.2857 | G |
| 5 | BICF2P781470   | 31373326 | A | 0   | 0      | G |
| 5 | BICF2G63034395 | 31385967 | A | 0   | 0      | G |
| 5 | BICF2G63034416 | 31403921 | A | 1   | 1      | G |
| 5 | BICF2G63034436 | 31413282 | G | 1   | 1      | A |
| 5 | BICF2G63034460 | 31423000 | G | 1   | 1      | A |
| 5 | BICF2G63034481 | 31434120 | A | 1   | 1      | C |
| 5 | BICF2G63034524 | 31457670 | G | 1   | 1      | A |
| 5 | BICF2G63034526 | 31464419 | C | 1   | 1      | A |
| 5 | BICF2G63034550 | 31489084 | G | 1   | 1      | A |
| 5 | BICF2G63034555 | 31499340 | A | 0.5 | 0.7143 | G |

|   |                |          |   |     |        |   |
|---|----------------|----------|---|-----|--------|---|
| 5 | BICF2G63034575 | 31529995 | 0 | 0   | 0      | A |
| 5 | BICF2G63034582 | 31544323 | 0 | 0   | 0      | A |
| 5 | BICF2P44411    | 31545314 | C | 0.5 | 0.7143 | A |
| 5 | BICF2G63034594 | 31561357 | A | 0.5 | 0.7143 | G |
| 5 | BICF2G63034601 | 31576703 | 0 | 0   | 0      | G |
| 5 | BICF2G63034605 | 31588080 | A | 0.5 | 0.7143 | G |
| 5 | BICF2P610496   | 31595937 | A | 0.5 | 0.7143 | G |
| 5 | BICF2S22936165 | 31605748 | A | 0   | 0      | G |
| 5 | BICF2P773632   | 31615209 | T | 0.5 | 0.7143 | A |
| 5 | BICF2P709414   | 31633381 | G | 0.5 | 0.7143 | A |
| 5 | BICF2G63034628 | 31636840 | 0 | 0   | 0      | A |
| 5 | BICF2G63034631 | 31653501 | 0 | 0   | 0      | G |
| 5 | BICF2P223818   | 31660232 | A | 0.5 | 0.7143 | G |
| 5 | BICF2G63034652 | 31678326 | 0 | 0   | 0      | G |
| 5 | BICF2G63034660 | 31689856 | A | 0   | 0      | G |
| 5 | BICF2G63034666 | 31696524 | C | 0   | 0      | G |
| 5 | BICF2P1144217  | 31724860 | A | 0.5 | 0.7143 | C |
| 5 | BICF2G63034681 | 31729509 | G | 0   | 0      | A |
| 5 | BICF2S22961775 | 31745277 | G | 0   | 0      | A |
| 5 | BICF2S23235080 | 31754419 | G | 0   | 0      | A |
| 5 | BICF2S22916604 | 31772797 | G | 0.5 | 0.7143 | A |
| 5 | BICF2S2314539  | 31777755 | A | 0.5 | 0.7143 | G |
| 5 | G336f39S126    | 31802515 | 0 | 0   | 0      | C |
| 5 | BICF2S23713499 | 31820074 | G | 0   | 0      | A |
| 5 | BICF2P1349419  | 31821126 | 0 | 0   | 0      | A |
| 5 | BICF2S23732925 | 31838235 | G | 0.5 | 0.2857 | A |
| 5 | BICF2G63034707 | 31851058 | A | 0.5 | 0.2857 | T |
| 5 | BICF2G63034712 | 31864346 | G | 1   | 1      | A |
| 5 | BICF2G63034715 | 31867203 | G | 1   | 1      | A |
| 5 | BICF2G63034729 | 31882133 | A | 0   | 0      | G |
| 5 | BICF2G63034732 | 31883823 | A | 1   | 1      | G |
| 5 | BICF2G63034742 | 31891009 | G | 0   | 0      | A |
| 5 | BICF2P142455   | 31909726 | G | 0.5 | 0.2857 | C |
| 5 | BICF2G63034778 | 31916573 | A | 0.5 | 0.2857 | G |
| 5 | BICF2P367560   | 31930804 | 0 | 0   | 0      | A |
| 5 | BICF2S23057738 | 31955509 | G | 0   | 0      | A |
| 5 | BICF2G63034795 | 31972325 | G | 0.5 | 0.7143 | A |
| 5 | BICF2G63034802 | 31984377 | G | 1   | 1      | A |
| 5 | BICF2G63034824 | 31994049 | A | 1   | 1      | G |
| 5 | BICF2G63034825 | 31994119 | A | 0   | 0      | G |
| 5 | BICF2G63034848 | 32005227 | A | 0.5 | 0.7143 | C |
| 5 | BICF2P644940   | 32018566 | G | 0.5 | 0.7143 | A |
| 5 | BICF2S23351182 | 32029995 | G | 0   | 0      | A |
| 5 | BICF2P1255456  | 32049403 | A | 0.5 | 0.6    | T |
| 5 | BICF2P948952   | 32054008 | G | 0.5 | 0.8    | A |
| 5 | BICF2P297927   | 32068916 | G | 0   | 0      | A |
| 5 | BICF2P497913   | 32075807 | G | 1   | 1      | A |

|   |                        |          |   |     |        |   |
|---|------------------------|----------|---|-----|--------|---|
| 5 | BICF2G63034889         | 32096001 | G | 1   | 1      | A |
| 5 | BICF2G63034907         | 32104199 | A | 0.5 | 0.7143 | G |
| 5 | BICF2P893461           | 32114865 | G | 0   | 0      | C |
| 5 | BICF2G63034943         | 32125897 | A | 1   | 1      | G |
| 5 | BICF2G63034949         | 32140044 | G | 0.5 | 0.2857 | A |
| 5 | BICF2G63034955         | 32143993 | A | 0   | 0      | C |
| 5 | BICF2G63034972         | 32159024 | A | 0   | 0      | C |
| 5 | BICF2G63034979         | 32166446 | 0 | 0   | 0      | G |
| 5 | BICF2G63035005         | 32182654 | G | 0.5 | 0.2857 | A |
| 5 | BICF2G63035030         | 32197936 | A | 0.5 | 0.7143 | G |
| 5 | BICF2G63035039         | 32200727 | A | 0   | 0      | G |
| 5 | BICF2S23034980         | 32215439 | G | 0   | 0      | A |
| 5 | BICF2G63035069         | 32227113 | G | 0   | 0      | A |
| 5 | BICF2G63035080         | 32242056 | A | 0   | 0      | G |
| 5 | BICF2P853011           | 32246812 | A | 0.5 | 0.2857 | G |
| 5 | BICF2G63035105         | 32266043 | A | 0   | 0      | G |
| 5 | BICF2G63035108         | 32270051 | A | 0   | 0      | G |
| 5 | BICF2S23435595         | 32270135 | G | 0   | 0      | A |
| 5 | BICF2G63035153         | 32282151 | G | 0   | 0      | A |
| 5 | BICF2G63035174         | 32289895 | G | 0   | 0      | A |
| 5 | BICF2G63035178         | 32292911 | C | 0   | 0      | A |
| 5 | BICF2G63035229         | 32305333 | A | 0   | 0      | G |
| 5 | BICF2S23741834         | 32308206 | A | 0   | 0      | G |
| 5 | BICF2G63035269         | 32315955 | G | 0   | 0      | A |
| 5 | BICF2G63035282         | 32327925 | G | 0   | 0      | A |
| 5 | BICF2G63035298         | 32338735 | G | 0   | 0      | A |
| 5 | BICF2P209517           | 32359028 | A | 0   | 0      | G |
| 5 | BICF2G63035338         | 32367525 | A | 0   | 0      | C |
| 5 | BICF2G63035343         | 32373488 | A | 0   | 0      | G |
| 5 | BICF2G63035352         | 32389983 | G | 0   | 0      | A |
| 5 | BICF2G63035363         | 32397199 | G | 1   | 1      | A |
| 5 | TIGRP2P70116_rs9132150 | 32436246 | 0 | 0   | 0      | G |
| 5 | G337f67S283            | 32457828 | G | 0   | 0      | A |
| 5 | BICF2S23212122         | 32486180 | A | 0   | 0      | C |
| 5 | BICF2S23049729         | 32498150 | A | 0   | 0      | T |
| 5 | BICF2P564732           | 32509030 | A | 0   | 0      | C |
| 5 | BICF2P531159           | 32513704 | 0 | 0   | 0      | A |
| 5 | BICF2S23058014         | 32531966 | A | 1   | 1      | G |
| 5 | BICF2S23056870         | 32535803 | G | 1   | 1      | A |
| 5 | BICF2P190310           | 32545774 | G | 0   | 0      | A |
| 5 | BICF2P875162           | 32557813 | A | 0   | 0      | G |
| 5 | BICF2G63035369         | 32578583 | 0 | 0   | 0      | A |
| 5 | BICF2P115675           | 32580081 | A | 1   | 1      | G |
| 5 | BICF2P1209136          | 32596236 | G | 1   | 1      | A |
| 5 | BICF2G63035376         | 32611758 | A | 0   | 0      | G |
| 5 | BICF2G63035383         | 32622509 | A | 0   | 0      | T |
| 5 | BICF2G63035403         | 32632285 | G | 0   | 0      | A |

|   |                 |          |   |   |   |   |
|---|-----------------|----------|---|---|---|---|
| 5 | BICF2G63035423  | 32666562 | A | 0 | 0 | G |
| 5 | BICF2P1403452   | 32674842 | A | 1 | 1 | G |
| 5 | BICF2G63035429  | 32677016 | A | 0 | 0 | G |
| 5 | BICF2G63035445  | 32688767 | G | 0 | 0 | A |
| 5 | BICF2S2324177   | 32691619 | G | 1 | 1 | A |
| 5 | BICF2P1257162   | 32704081 | A | 1 | 1 | C |
| 5 | BICF2G63035476  | 32708612 | G | 0 | 0 | A |
| 5 | BICF2S23317145  | 32725862 | G | 0 | 0 | A |
| 5 | BICF2G63035506  | 32739976 | A | 0 | 0 | G |
| 5 | BICF2P271455    | 32743994 | G | 1 | 1 | A |
| 5 | BICF2P1405079   | 32757545 | A | 1 | 1 | C |
| 5 | BICF2G63035510  | 32757807 | C | 1 | 1 | A |
| 5 | BICF2G63035542  | 32771537 | G | 1 | 1 | A |
| 5 | BICF2P363092    | 32772158 | G | 1 | 1 | A |
| 5 | BICF2G63035558  | 32781895 | G | 1 | 1 | A |
| 5 | BICF2G63035564  | 32787898 | A | 1 | 1 | G |
| 5 | BICF2G63035577  | 32804686 | G | 1 | 1 | A |
| 5 | BICF2G63035590  | 32812469 | A | 0 | 0 | G |
| 5 | BICF2G63035622  | 32825677 | G | 0 | 0 | A |
| 5 | BICF2G63035634  | 32839388 | G | 0 | 0 | A |
| 5 | BICF2G63035639  | 32845055 | G | 0 | 0 | A |
| 5 | BICF2G63035674  | 32858771 | A | 0 | 0 | G |
| 5 | BICF2G63035700  | 32876294 | C | 0 | 0 | A |
| 5 | BICF2G63035705  | 32879166 | C | 0 | 0 | A |
| 5 | BICF2G63035726  | 32901346 | G | 1 | 1 | A |
| 5 | BICF2G63035729  | 32902463 | G | 1 | 1 | A |
| 5 | BICF2G63035735  | 32907940 | A | 0 | 0 | C |
| 5 | BICF2G63035745  | 32915280 | A | 1 | 1 | G |
| 5 | BICF2G63035754  | 32926679 | G | 0 | 0 | A |
| 5 | BICF2P1376728   | 32938943 | 0 | 0 | 0 | A |
| 5 | BICF2G63035778  | 32954927 | A | 1 | 1 | G |
| 5 | BICF2S235971    | 32959073 | A | 1 | 1 | G |
| 5 | BICF2G63035789  | 32972070 | A | 1 | 1 | G |
| 5 | BICF2S232422    | 32983613 | A | 1 | 1 | G |
| 5 | BICF2G63035829  | 32998418 | G | 0 | 0 | A |
| 5 | BICF2P93507     | 33009401 | A | 1 | 1 | G |
| 5 | BICF2S23250257  | 33017317 | G | 1 | 1 | A |
| 5 | BICF2G630182095 | 33066504 | A | 0 | 0 | G |
| 5 | BICF2G630182101 | 33087875 | 0 | 0 | 0 | G |
| 5 | BICF2G630182112 | 33109469 | 0 | 0 | 0 | G |
| 5 | BICF2G630182114 | 33111397 | 0 | 0 | 0 | G |
| 5 | BICF2G630182116 | 33112623 | G | 0 | 0 | A |
| 5 | BICF2G630182122 | 33114868 | G | 0 | 0 | A |
| 5 | BICF2G630182126 | 33121641 | A | 0 | 0 | C |
| 5 | BICF2G630182130 | 33132321 | A | 0 | 0 | G |
| 5 | BICF2G630182143 | 33145023 | A | 0 | 0 | G |
| 5 | BICF2G630182161 | 33161069 | G | 0 | 0 | A |



|   |                        |          |   |   |        |   |
|---|------------------------|----------|---|---|--------|---|
| 5 | BICF2G630182163        | 33172996 | A | 0 | 0      | C |
| 5 | BICF2G630182165        | 33180027 | A | 0 | 0      | G |
| 5 | BICF2G630182171        | 33194533 | G | 0 | 0      | A |
| 5 | BICF2G630182175        | 33200436 | A | 0 | 0      | G |
| 5 | BICF2G630182178        | 33205153 | A | 0 | 0      | G |
| 5 | BICF2G630182181        | 33222993 | 0 | 0 | 0      | G |
| 5 | BICF2G630182182        | 33223759 | 0 | 0 | 0      | G |
| 5 | BICF2P244956           | 33235295 | A | 0 | 0      | G |
| 5 | BICF2G630182187        | 33249352 | T | 0 | 0      | A |
| 5 | BICF2G630182191        | 33271775 | A | 0 | 0      | G |
| 5 | BICF2P342766           | 33306736 | A | 1 | 1      | G |
| 5 | TIGRP2P70256_rs8990724 | 33336430 | 0 | 0 | 0      | C |
| 5 | BICF2S23641676         | 33349773 | G | 0 | 0      | A |
| 5 | BICF2P18343            | 33382614 | 0 | 0 | 0      | A |
| 5 | BICF2P860608           | 33392133 | 0 | 0 | 0      | G |
| 5 | BICF2G630182200        | 33404832 | A | 0 | 0      | C |
| 5 | BICF2P1339473          | 33411030 | A | 0 | 0.1667 | C |
| 5 | BICF2P584586           | 33464861 | 0 | 0 | 0      | G |
| 5 | BICF2G630182204        | 33481797 | T | 0 | 0      | A |
| 5 | BICF2G630182217        | 33489043 | A | 0 | 0      | G |
| 5 | BICF2G630182219        | 33505032 | A | 1 | 1      | G |
| 5 | BICF2G630182225        | 33523633 | A | 1 | 1      | G |
| 5 | BICF2G630182263        | 33542974 | A | 0 | 0      | C |
| 5 | BICF2S23647232         | 33555229 | A | 0 | 0      | C |
| 5 | BICF2S233851           | 33565857 | 0 | 0 | 0      | A |
| 5 | BICF2S23135707         | 33576622 | A | 0 | 0      | G |
| 5 | BICF2P113597           | 33591032 | G | 0 | 0      | A |
| 5 | BICF2P949256           | 33599543 | G | 1 | 1      | A |
| 5 | BICF2G630182280        | 33610155 | 0 | 0 | 0      | G |
| 5 | BICF2P509283           | 33617005 | G | 0 | 0.3571 | A |
| 5 | BICF2P891223           | 33626796 | A | 0 | 0      | C |
| 5 | BICF2P475219           | 33641408 | C | 0 | 0.3571 | A |
| 5 | BICF2G630182288        | 33656088 | A | 0 | 0      | G |
| 5 | BICF2G630182300        | 33667537 | G | 0 | 0      | A |
| 5 | BICF2S23722402         | 33682368 | A | 1 | 1      | G |
| 5 | BICF2G630182317        | 33694580 | A | 0 | 0      | G |
| 5 | BICF2P711366           | 33695207 | C | 0 | 0      | A |
| 5 | BICF2S23756179         | 33706617 | A | 1 | 1      | G |
| 5 | BICF2G630182331        | 33724420 | A | 1 | 1      | G |
| 5 | BICF2G630182334        | 33734017 | G | 1 | 1      | A |
| 5 | BICF2G630182339        | 33744815 | G | 1 | 1      | A |
| 5 | BICF2S23351431         | 33758285 | A | 1 | 1      | G |
| 5 | BICF2S23712534         | 33774147 | G | 0 | 0      | A |
| 5 | BICF2P534414           | 33778368 | A | 0 | 0      | G |
| 5 | BICF2G630182351        | 33787544 | A | 1 | 1      | G |
| 5 | BICF2G630182360        | 33802647 | G | 1 | 1      | A |
| 5 | TIGRP2P70281_rs9009889 | 33815843 | 0 | 0 | 0      | C |

|   |                        |          |   |   |        |   |
|---|------------------------|----------|---|---|--------|---|
| 5 | BICF2P387265           | 33822236 | C | 0 | 0      | A |
| 5 | BICF2G630182371        | 33841293 | G | 0 | 0      | A |
| 5 | BICF2G630182377        | 33855235 | A | 0 | 0      | G |
| 5 | BICF2G630182387        | 33863122 | A | 0 | 0      | G |
| 5 | BICF2G630182394        | 33872520 | G | 1 | 0.6429 | A |
| 5 | BICF2G630182408        | 33885310 | A | 0 | 0      | G |
| 5 | BICF2G630182416        | 33900370 | A | 0 | 0      | G |
| 5 | BICF2G630182417        | 33902404 | A | 0 | 0      | C |
| 5 | BICF2G630182419        | 33907693 | A | 0 | 0      | G |
| 5 | BICF2G630182423        | 33920793 | A | 1 | 1      | G |
| 5 | BICF2S2294378          | 33932564 | A | 1 | 0.6429 | G |
| 5 | BICF2S23426541         | 33941015 | 0 | 0 | 0      | G |
| 5 | BICF2S23034711         | 33948691 | C | 1 | 0.6429 | A |
| 5 | BICF2P309809           | 33951606 | A | 0 | 0      | G |
| 5 | BICF2G630182434        | 33958216 | A | 0 | 0.3571 | G |
| 5 | BICF2P165957           | 33960444 | A | 0 | 0      | G |
| 5 | BICF2G630182458        | 33980891 | A | 0 | 0      | G |
| 5 | BICF2S23339487         | 33983392 | A | 1 | 1      | C |
| 5 | BICF2G630182460        | 33995804 | A | 0 | 0      | G |
| 5 | BICF2S23036463         | 34009871 | A | 1 | 1      | G |
| 5 | BICF2G630182484        | 34023117 | A | 0 | 0      | G |
| 5 | BICF2G630182500        | 34032870 | G | 1 | 1      | A |
| 5 | BICF2P58417            | 34042443 | G | 1 | 1      | A |
| 5 | BICF2P849914           | 34053245 | C | 1 | 1      | A |
| 5 | BICF2P1243852          | 34066265 | C | 1 | 1      | A |
| 5 | BICF2P1243844          | 34067927 | G | 1 | 1      | A |
| 5 | BICF2P47085            | 34082534 | 0 | 0 | 0      | G |
| 5 | TIGRP2P70316_rs9232068 | 34090631 | A | 1 | 1      | G |
| 5 | BICF2P961576           | 34108486 | G | 1 | 1      | A |
| 5 | BICF2P1384061          | 34110469 | G | 1 | 1      | A |
| 5 | BICF2P1345275          | 34124126 | A | 1 | 1      | G |
| 5 | BICF2P94109            | 34157574 | A | 1 | 1      | G |
| 5 | BICF2P328828           | 34167997 | A | 1 | 1      | G |
| 5 | BICF2P1086169          | 34181930 | A | 1 | 1      | G |
| 5 | BICF2P1086165          | 34183023 | C | 0 | 0      | G |
| 5 | BICF2S23431976         | 34199594 | 0 | 0 | 0      | A |
| 5 | BICF2P739313           | 34211721 | A | 0 | 0      | G |
| 5 | BICF2P495815           | 34213282 | A | 0 | 0      | G |
| 5 | BICF2P1245098          | 34234918 | 0 | 0 | 0      | C |
| 5 | BICF2P1298063          | 34240012 | G | 0 | 0      | A |
| 5 | BICF2P646287           | 34247685 | C | 0 | 0      | A |
| 5 | BICF2S23353822         | 34265402 | A | 0 | 0      | G |
| 5 | BICF2P170841           | 34275412 | 0 | 0 | 0      | T |
| 5 | TIGRP2P70360_rs8802599 | 34291290 | 0 | 0 | 0      | A |
| 5 | BICF2G630182542        | 34306753 | C | 1 | 1      | A |
| 5 | BICF2P1270366          | 34336828 | A | 0 | 0      | G |
| 5 | BICF2P1226001          | 34340133 | 0 | 0 | 0      | C |

|   |                        |          |   |   |        |   |
|---|------------------------|----------|---|---|--------|---|
| 5 | BICF2P576634           | 34364903 | 0 | 0 | 0      | G |
| 5 | BICF2P449694           | 34373710 | A | 0 | 0      | G |
| 5 | BICF2S2332602          | 34390597 | A | 1 | 1      | G |
| 5 | BICF2G630182563        | 34407893 | A | 0 | 0      | T |
| 5 | BICF2P1217448          | 34411959 | A | 1 | 1      | G |
| 5 | BICF2P291957           | 34430217 | A | 0 | 0      | G |
| 5 | BICF2P1115042          | 34434701 | T | 1 | 1      | A |
| 5 | BICF2S23353896         | 34453995 | C | 1 | 1      | A |
| 5 | BICF2P791484           | 34463023 | G | 0 | 0      | A |
| 5 | BICF2P154622           | 34480550 | A | 0 | 0      | G |
| 5 | BICF2G630182569        | 34490530 | A | 0 | 0      | G |
| 5 | BICF2G630182583        | 34512211 | T | 0 | 0      | A |
| 5 | BICF2G630182589        | 34523422 | A | 0 | 0      | G |
| 5 | BICF2G630182604        | 34538796 | A | 0 | 0      | G |
| 5 | BICF2G630182609        | 34548761 | A | 0 | 0      | G |
| 5 | BICF2S23416100         | 34552051 | G | 0 | 0      | A |
| 5 | BICF2G630182626        | 34558314 | A | 0 | 0      | G |
| 5 | BICF2G630182632        | 34569605 | 0 | 0 | 0      | C |
| 5 | BICF2G630182636        | 34589470 | A | 1 | 1      | G |
| 5 | BICF2S23544401         | 34603343 | G | 0 | 0      | A |
| 5 | BICF2G630182650        | 34607317 | A | 1 | 1      | G |
| 5 | BICF2G630182654        | 34624101 | G | 1 | 1      | A |
| 5 | BICF2G630182655        | 34631197 | G | 1 | 1      | A |
| 5 | BICF2G630182658        | 34647442 | G | 0 | 0      | A |
| 5 | BICF2G630182661        | 34652148 | G | 1 | 1      | A |
| 5 | TIGRP2P70367_rs9004740 | 34662362 | 0 | 0 | 0      | A |
| 5 | BICF2P692633           | 34675781 | A | 1 | 1      | G |
| 5 | BICF2G630182675        | 34704328 | G | 1 | 0.6429 | A |
| 5 | BICF2S23443053         | 34710722 | A | 0 | 0.3571 | G |
| 5 | BICF2G630182679        | 34720473 | G | 1 | 0.6429 | A |
| 5 | BICF2G630182687        | 34738198 | A | 1 | 0.6429 | G |
| 5 | BICF2S23443332         | 34741886 | 0 | 0 | 0      | G |
| 5 | BICF2P1312293          | 34760753 | A | 0 | 0      | G |
| 5 | BICF2G630182729        | 34796613 | A | 0 | 0      | C |
| 5 | BICF2G630182746        | 34808975 | G | 0 | 0      | A |
| 5 | BICF2G630182755        | 34814503 | A | 0 | 0      | G |
| 5 | BICF2P254932           | 34826160 | 0 | 0 | 0      | G |
| 5 | BICF2P450384           | 34841789 | 0 | 0 | 0      | G |
| 5 | BICF2P496810           | 34851816 | 0 | 0 | 0      | C |
| 5 | BICF2S23631833         | 34879011 | 0 | 0 | 0      | C |
| 5 | BICF2S2349724          | 34886283 | 0 | 0 | 0      | G |
| 5 | BICF2G630182762        | 34892243 | A | 1 | 1      | G |
| 5 | BICF2G630182765        | 34912496 | A | 0 | 0      | C |
| 5 | BICF2G630182771        | 34916736 | A | 0 | 0      | G |
| 5 | BICF2G630182801        | 34933874 | C | 0 | 0      | A |
| 5 | BICF2G630182805        | 34948327 | G | 1 | 1      | A |
| 5 | BICF2G630182807        | 34955867 | A | 0 | 0      | C |

|   |                        |          |   |   |   |   |
|---|------------------------|----------|---|---|---|---|
| 5 | BICF2G630182810        | 34960599 | G | 0 | 0 | A |
| 5 | BICF2G630182831        | 34980333 | A | 0 | 0 | G |
| 5 | BICF2G630182835        | 34988366 | T | 0 | 0 | A |
| 5 | BICF2G630182839        | 34998591 | C | 0 | 0 | A |
| 5 | BICF2G630182847        | 35010844 | G | 0 | 0 | A |
| 5 | BICF2G630182861        | 35018779 | A | 0 | 0 | G |
| 5 | BICF2G630182874        | 35029528 | G | 0 | 0 | A |
| 5 | BICF2G630182886        | 35056533 | A | 0 | 0 | G |
| 5 | BICF2S2361137          | 35075059 | 0 | 0 | 0 | G |
| 5 | BICF2P1149896          | 35092108 | 0 | 0 | 0 | C |
| 5 | BICF2G630182901        | 35108429 | A | 0 | 0 | C |
| 5 | BICF2G630182902        | 35110780 | G | 0 | 0 | A |
| 5 | BICF2G630182934        | 35139762 | C | 0 | 0 | G |
| 5 | TIGRP2P70373_rs9067743 | 35148325 | 0 | 0 | 0 | C |
| 5 | BICF2G630182944        | 35155584 | A | 0 | 0 | G |
| 5 | BICF2G630182945        | 35171523 | C | 0 | 0 | A |
| 5 | BICF2G630182947        | 35186711 | A | 0 | 0 | T |
| 5 | TIGRP2P70375_rs9205113 | 35197029 | 0 | 0 | 0 | G |
| 5 | BICF2S23652976         | 35203942 | A | 0 | 0 | T |
| 5 | BICF2P1133895          | 35227099 | 0 | 0 | 0 | A |
| 5 | BICF2G630182952        | 35267557 | A | 0 | 0 | G |
| 5 | BICF2S23323312         | 35270649 | A | 0 | 0 | C |
| 5 | BICF2S23630802         | 35313124 | G | 0 | 0 | A |
| 5 | BICF2P698330           | 35317283 | 0 | 0 | 0 | C |
| 5 | BICF2P380586           | 35329108 | 0 | 0 | 0 | G |
| 5 | BICF2S23649880         | 35348610 | G | 0 | 0 | A |
| 5 | BICF2G630182974        | 35352729 | G | 0 | 0 | A |
| 5 | BICF2P1211313          | 35370670 | G | 0 | 0 | C |
| 5 | BICF2G630182979        | 35384970 | G | 1 | 1 | A |
| 5 | BICF2G630182980        | 35396466 | 0 | 0 | 0 | C |
| 5 | BICF2P803532           | 35399480 | A | 0 | 0 | T |
| 5 | BICF2P1099503          | 35416892 | A | 0 | 0 | G |
| 5 | BICF2P125222           | 35421800 | G | 0 | 0 | A |
| 5 | BICF2P798838           | 35439870 | G | 0 | 0 | A |
| 5 | BICF2S23721153         | 35454577 | G | 0 | 0 | A |
| 5 | BICF2P557550           | 35468371 | A | 0 | 0 | C |
| 5 | BICF2G630182991        | 35479814 | A | 1 | 1 | C |
| 5 | BICF2P621135           | 35496567 | A | 0 | 0 | G |
| 5 | BICF2P734687           | 35504251 | G | 0 | 0 | A |
| 5 | BICF2P974089           | 35545353 | 0 | 0 | 0 | A |
| 5 | BICF2P1023292          | 35551827 | 0 | 0 | 0 | C |
| 5 | BICF2P902647           | 35561689 | 0 | 0 | 0 | G |
| 5 | BICF2P516942           | 35589042 | 0 | 0 | 0 | G |
| 5 | BICF2P232753           | 35593850 | 0 | 0 | 0 | G |
| 5 | BICF2S23626288         | 35609132 | A | 0 | 0 | G |
| 5 | BICF2P84424            | 35623993 | 0 | 0 | 0 | C |
| 5 | BICF2P538531           | 35636542 | G | 0 | 0 | A |

|   |                 |          |   |   |        |   |
|---|-----------------|----------|---|---|--------|---|
| 5 | BICF2P1256516   | 35640937 | A | 0 | 0      | G |
| 5 | BICF2P1150834   | 35681646 | G | 0 | 0      | A |
| 5 | BICF2P963308    | 35706834 | 0 | 0 | 0      | C |
| 5 | BICF2P168496    | 35740097 | 0 | 0 | 0      | G |
| 5 | BICF2P1051264   | 35751575 | 0 | 0 | 0      | G |
| 5 | BICF2P338628    | 35755815 | G | 0 | 0      | A |
| 5 | BICF2S23656118  | 35781878 | A | 0 | 0      | G |
| 5 | BICF2G630183016 | 35795481 | A | 1 | 1      | C |
| 5 | BICF2G630183027 | 35806461 | A | 0 | 0      | G |
| 5 | BICF2P763491    | 35818300 | A | 0 | 0      | G |
| 5 | BICF2G630183045 | 35834085 | C | 0 | 0      | A |
| 5 | BICF2P99750     | 35855279 | C | 0 | 0      | G |
| 5 | BICF2G630183070 | 35865449 | A | 1 | 1      | G |
| 5 | BICF2G630183073 | 35871340 | A | 0 | 0      | G |
| 5 | BICF2G630183083 | 35889481 | T | 0 | 0      | A |
| 5 | BICF2G630183089 | 35897353 | G | 1 | 1      | A |
| 5 | BICF2P1231200   | 35915206 | G | 1 | 1      | A |
| 5 | BICF2S23412476  | 35920124 | A | 1 | 1      | G |
| 5 | BICF2G630183104 | 35926254 | A | 0 | 0      | C |
| 5 | BICF2P645423    | 35940905 | A | 1 | 1      | C |
| 5 | BICF2G630183107 | 35958915 | A | 1 | 1      | G |
| 5 | BICF2S23449369  | 35963813 | G | 1 | 1      | A |
| 5 | BICF2G630183111 | 35985186 | A | 0 | 0      | G |
| 5 | BICF2P639123    | 35995857 | G | 0 | 0      | A |
| 5 | BICF2G630183119 | 35995970 | C | 1 | 1      | A |
| 5 | BICF2G630183123 | 36015910 | A | 0 | 0      | G |
| 5 | BICF2G630183126 | 36021759 | C | 0 | 0      | A |
| 5 | BICF2P215448    | 36040214 | A | 0 | 0      | C |
| 5 | BICF2S2325790   | 36081874 | G | 1 | 0.6429 | A |
| 5 | BICF2P731728    | 36098191 | G | 0 | 0.3571 | C |
| 5 | BICF2S23242721  | 36104924 | G | 1 | 0.6429 | A |
| 5 | BICF2G630183134 | 36115718 | A | 1 | 0.6429 | G |
| 5 | BICF2G630183158 | 36129586 | C | 0 | 0      | A |
| 5 | BICF2G630183160 | 36139809 | C | 0 | 0.3333 | A |
| 5 | BICF2S2333678   | 36149650 | A | 0 | 0      | G |
| 5 | BICF2G630183175 | 36159293 | A | 0 | 0      | G |
| 5 | BICF2P163422    | 36167824 | A | 1 | 0.6429 | G |
| 5 | BICF2G630183195 | 36180581 | G | 1 | 1      | A |
| 5 | BICF2G630183204 | 36191301 | C | 0 | 0.3571 | A |
| 5 | BICF2G630183230 | 36220358 | G | 0 | 0      | A |
| 5 | BICF2S2309606   | 36225969 | G | 0 | 0      | A |
| 5 | BICF2G630183260 | 36237561 | A | 0 | 0.3571 | G |
| 5 | BICF2G630183278 | 36253204 | A | 0 | 0      | G |
| 5 | BICF2G630183286 | 36267981 | A | 0 | 0      | G |
| 5 | BICF2G630183294 | 36275423 | A | 0 | 0.3571 | G |
| 5 | BICF2G630183307 | 36286782 | A | 0 | 0      | G |
| 5 | BICF2G630183311 | 36297512 | G | 0 | 0      | A |

|   |                        |          |   |   |        |   |
|---|------------------------|----------|---|---|--------|---|
| 5 | BICF2G630183316        | 36308339 | A | 0 | 0.3571 | G |
| 5 | BICF2S23628022         | 36323725 | 0 | 0 | 0      | G |
| 5 | BICF2G630183322        | 36329420 | G | 0 | 0.3571 | A |
| 5 | BICF2P464907           | 36347068 | A | 0 | 0      | G |
| 5 | BICF2G630183333        | 36380114 | A | 0 | 0      | G |
| 5 | BICF2G630183337        | 36386455 | A | 0 | 0.3571 | G |
| 5 | BICF2G630183354        | 36417176 | A | 0 | 0.3571 | G |
| 5 | BICF2G630183360        | 36424277 | A | 0 | 0      | G |
| 5 | BICF2P974193           | 36432179 | G | 0 | 0.3571 | A |
| 5 | BICF2G630183370        | 36433846 | G | 0 | 0      | A |
| 5 | BICF2G630183385        | 36448165 | A | 0 | 0      | G |
| 5 | BICF2G630183412        | 36455085 | A | 0 | 0      | G |
| 5 | BICF2P908870           | 36466881 | A | 1 | 1      | G |
| 5 | BICF2P52587            | 36476657 | A | 1 | 0.6429 | C |
| 5 | BICF2G630183440        | 36483249 | A | 0 | 0      | G |
| 5 | BICF2G630183462        | 36493588 | A | 0 | 0      | G |
| 5 | BICF2G630183477        | 36502769 | G | 1 | 0.6429 | A |
| 5 | BICF2G630183494        | 36516031 | A | 0 | 0.3571 | G |
| 5 | BICF2G630183502        | 36526036 | G | 1 | 1      | A |
| 5 | BICF2P300064           | 36544568 | A | 1 | 1      | G |
| 5 | BICF2G630183510        | 36551475 | G | 0 | 0      | A |
| 5 | TIGRP2P70406_rs9057888 | 36569755 | 0 | 0 | 0      | G |
| 5 | BICF2S22943297         | 36580694 | G | 1 | 0.6429 | A |
| 5 | BICF2P684828           | 36581825 | 0 | 0 | 0      | C |
| 5 | BICF2S23247854         | 36627467 | A | 0 | 0      | C |
| 5 | BICF2P954487           | 36629550 | G | 1 | 0.6429 | A |
| 5 | BICF2G630183540        | 36641857 | A | 0 | 0      | G |
| 5 | BICF2P662247           | 36680712 | 0 | 0 | 0      | C |
| 5 | TIGRP2P70409_rs8755759 | 36688323 | 0 | 0 | 0      | G |
| 5 | BICF2G630183551        | 36738109 | A | 0 | 0.3571 | G |
| 5 | BICF2G630183554        | 36744398 | 0 | 0 | 0      | G |
| 5 | BICF2G630183575        | 36758281 | A | 0 | 0.3571 | G |
| 5 | BICF2G630183581        | 36766013 | A | 0 | 0.3571 | G |
| 5 | BICF2G630183588        | 36782760 | A | 0 | 0      | G |
| 5 | BICF2G630183598        | 36795159 | A | 0 | 0      | T |
| 5 | BICF2G630183600        | 36801419 | A | 0 | 0      | G |
| 5 | BICF2P1396246          | 36817650 | A | 0 | 0      | G |
| 5 | BICF2G630183615        | 36829037 | G | 0 | 0      | A |
| 5 | BICF2G630183623        | 36839546 | A | 0 | 0      | G |
| 5 | BICF2G630183626        | 36845402 | G | 0 | 0      | A |
| 5 | BICF2G630183630        | 36848237 | G | 0 | 0      | A |
| 5 | BICF2P153003           | 36866416 | G | 0 | 0      | A |
| 5 | BICF2G630183638        | 36866798 | 0 | 0 | 0      | T |
| 5 | BICF2P65741            | 36877443 | G | 0 | 0      | A |
| 5 | BICF2G630183652        | 36882261 | 0 | 0 | 0      | G |
| 5 | BICF2G630183659        | 36901882 | 0 | 0 | 0      | G |
| 5 | BICF2G630183672        | 36918297 | G | 0 | 0      | A |

|   |                        |          |   |   |        |   |
|---|------------------------|----------|---|---|--------|---|
| 5 | BICF2G630183701        | 36942978 | 0 | 0 | 0      | G |
| 5 | BICF2G630183721        | 36970791 | 0 | 0 | 0      | G |
| 5 | BICF2G630183725        | 36980723 | C | 0 | 0      | A |
| 5 | BICF2P1228354          | 36987035 | G | 0 | 0      | A |
| 5 | BICF2G630183733        | 36995725 | 0 | 0 | 0      | G |
| 5 | BICF2G630183754        | 37010344 | 0 | 0 | 0      | G |
| 5 | BICF2G630183765        | 37023412 | 0 | 0 | 0      | C |
| 5 | BICF2S2297096          | 37039243 | A | 0 | 0      | G |
| 5 | BICF2G630183778        | 37049364 | 0 | 0 | 0      | A |
| 5 | BICF2G630183781        | 37055529 | A | 0 | 0      | G |
| 5 | BICF2G630183793        | 37069801 | G | 0 | 0      | A |
| 5 | BICF2G630183805        | 37081986 | A | 0 | 0      | G |
| 5 | BICF2S23749414         | 37090201 | A | 0 | 0      | G |
| 5 | BICF2P267306           | 37099612 | A | 0 | 0      | G |
| 5 | BICF2P1337948          | 37111219 | C | 0 | 0      | A |
| 5 | BICF2S23438844         | 37128092 | A | 0 | 0      | G |
| 5 | BICF2P68050            | 37134649 | A | 0 | 0      | G |
| 5 | BICF2P1190032          | 37152828 | G | 0 | 0.3571 | A |
| 5 | BICF2P215349           | 37160731 | A | 0 | 0      | G |
| 5 | BICF2G630183806        | 37172005 | 0 | 0 | 0      | A |
| 5 | BICF2P470453           | 37198278 | A | 0 | 0.3571 | C |
| 5 | BICF2S22919273         | 37221857 | A | 0 | 0.3571 | G |
| 5 | BICF2P252322           | 37225409 | A | 0 | 0.3571 | G |
| 5 | BICF2S23059225         | 37233291 | A | 0 | 0      | G |
| 5 | TIGRP2P70421_rs8809030 | 37247015 | 0 | 0 | 0      | G |
| 5 | BICF2P963999           | 37248661 | 0 | 0 | 0      | A |
| 5 | BICF2P957356           | 37264375 | 0 | 0 | 0      | A |
| 5 | BICF2P421158           | 37289012 | 0 | 0 | 0      | G |
| 5 | TIGRP2P70423_rs9171653 | 37298295 | 0 | 0 | 0      | G |
| 5 | BICF2P875538           | 37315008 | G | 0 | 0      | A |
| 5 | BICF2P875539           | 37315513 | G | 0 | 0      | A |
| 5 | BICF2P677057           | 37318220 | G | 0 | 0      | A |
| 5 | BICF2G630183807        | 37355744 | A | 1 | 0.6429 | G |
| 5 | BICF2S23122235         | 37366597 | A | 0 | 0      | G |
| 5 | BICF2G630183812        | 37382169 | G | 0 | 0      | A |
| 5 | BICF2P443615           | 37397200 | A | 0 | 0      | G |
| 5 | BICF2G630183831        | 37406702 | G | 0 | 0      | A |
| 5 | BICF2G630183856        | 37423251 | G | 0 | 0      | A |
| 5 | BICF2G630183881        | 37436555 | A | 0 | 0      | C |
| 5 | BICF2G630183899        | 37445259 | A | 0 | 0      | G |
| 5 | BICF2G630183914        | 37462987 | 0 | 0 | 0      | G |
| 5 | BICF2S23612088         | 37470829 | A | 0 | 0      | G |
| 5 | TIGRP2P70429_rs9233234 | 37479330 | 0 | 0 | 0      | C |
| 5 | BICF2G630183931        | 37490895 | A | 0 | 0      | G |
| 5 | BICF2G630183936        | 37522717 | 0 | 0 | 0      | G |
| 5 | BICF2P230614           | 37535456 | 0 | 0 | 0      | G |
| 5 | BICF2G630183937        | 37545942 | 0 | 0 | 0      | G |

|   |                        |          |   |   |   |   |
|---|------------------------|----------|---|---|---|---|
| 5 | BICF2P34344            | 37552003 | 0 | 0 | 0 | C |
| 5 | G338f35S290            | 37578368 | A | 1 | 1 | C |
| 5 | G338f42S239            | 37584702 | G | 1 | 1 | A |
| 5 | BICF2G630183952        | 37609394 | A | 0 | 0 | G |
| 5 | BICF2G630183953        | 37621742 | G | 0 | 0 | A |
| 5 | BICF2S2311835          | 37631936 | A | 0 | 0 | C |
| 5 | BICF2P860094           | 37654458 | 0 | 0 | 0 | A |
| 5 | BICF2P974099           | 37669878 | A | 0 | 0 | G |
| 5 | BICF2G630183956        | 37677712 | T | 0 | 0 | A |
| 5 | BICF2G630183959        | 37689838 | G | 0 | 0 | A |
| 5 | BICF2G630183964        | 37707206 | A | 0 | 0 | T |
| 5 | BICF2G630183965        | 37709895 | C | 0 | 0 | A |
| 5 | BICF2G630183984        | 37736985 | C | 0 | 0 | A |
| 5 | BICF2G630183987        | 37743815 | C | 0 | 0 | A |
| 5 | BICF2G630184002        | 37756314 | C | 0 | 0 | A |
| 5 | BICF2S235711           | 37876722 | G | 0 | 0 | A |
| 5 | BICF2P1186960          | 37907013 | 0 | 0 | 0 | A |
| 5 | BICF2G630184009        | 37921975 | G | 0 | 0 | A |
| 5 | BICF2G630184023        | 37929790 | A | 0 | 0 | G |
| 5 | BICF2G630184036        | 37949401 | A | 0 | 0 | G |
| 5 | BICF2G630184039        | 37953528 | A | 0 | 0 | G |
| 5 | BICF2G630184049        | 37970568 | G | 0 | 0 | A |
| 5 | BICF2G630184051        | 37973447 | G | 0 | 0 | A |
| 5 | BICF2G630184059        | 37994917 | G | 0 | 0 | A |
| 5 | BICF2G630184061        | 37996061 | C | 0 | 0 | A |
| 5 | BICF2G630184094        | 38013111 | A | 0 | 0 | G |
| 5 | BICF2G630184103        | 38027373 | A | 0 | 0 | G |
| 5 | BICF2G630184111        | 38033352 | A | 1 | 1 | C |
| 5 | BICF2G630184122        | 38044426 | G | 1 | 1 | A |
| 5 | BICF2G630184139        | 38060129 | G | 0 | 0 | A |
| 5 | BICF2P580706           | 38066798 | G | 0 | 0 | A |
| 5 | BICF2G630184159        | 38068065 | G | 0 | 0 | A |
| 5 | BICF2G630184165        | 38077457 | A | 0 | 0 | G |
| 5 | BICF2G630184189        | 38091216 | A | 1 | 1 | G |
| 5 | BICF2G630184196        | 38097112 | A | 0 | 0 | G |
| 5 | BICF2P941188           | 38102848 | A | 0 | 0 | G |
| 5 | BICF2G630184234        | 38118038 | A | 1 | 1 | C |
| 5 | BICF2G630184240        | 38126167 | G | 1 | 1 | A |
| 5 | TIGRP2P70446_rs8969744 | 38151503 | 0 | 0 | 0 | G |
| 5 | BICF2G630184243        | 38157575 | A | 0 | 0 | G |
| 5 | BICF2P781236           | 38174646 | A | 0 | 0 | G |
| 5 | BICF2G630184245        | 38186891 | G | 0 | 0 | C |
| 5 | TIGRP2P70448_rs8751283 | 38198306 | 0 | 0 | 0 | G |
| 5 | BICF2P927065           | 38205183 | 0 | 0 | 0 | C |
| 5 | BICF2G630184248        | 38216242 | A | 0 | 0 | G |
| 5 | BICF2G630184254        | 38240684 | G | 0 | 0 | A |
| 5 | BICF2P1062097          | 38250309 | G | 0 | 0 | A |



|   |                 |          |   |   |   |   |
|---|-----------------|----------|---|---|---|---|
| 5 | BICF2G630184285 | 38271670 | A | 0 | 0 | G |
| 5 | BICF2P233650    | 38284991 | A | 0 | 0 | C |
| 5 | BICF2G630184334 | 38298395 | G | 0 | 0 | A |
| 5 | BICF2G630184335 | 38298615 | G | 0 | 0 | A |
| 5 | BICF2P648451    | 38309886 | A | 0 | 0 | C |
| 5 | BICF2G630184367 | 38319693 | A | 0 | 0 | G |
| 5 | BICF2G630184378 | 38330071 | G | 0 | 0 | A |
| 5 | BICF2G630184401 | 38345784 | A | 0 | 0 | G |
| 5 | BICF2G630184432 | 38355077 | G | 0 | 0 | A |
| 5 | BICF2G630184468 | 38364482 | A | 0 | 0 | C |
| 5 | BICF2G630184477 | 38370782 | A | 0 | 0 | G |
| 5 | BICF2S2312076   | 38384585 | G | 0 | 0 | A |
| 5 | BICF2G630184496 | 38404483 | A | 1 | 1 | T |
| 5 | BICF2S23421104  | 38426955 | G | 0 | 0 | A |
| 5 | BICF2S22936116  | 38434139 | G | 0 | 0 | A |
| 5 | BICF2P629205    | 38467785 | A | 0 | 0 | G |
| 5 | BICF2S22915624  | 38488629 | C | 0 | 0 | A |
| 5 | BICF2G630184499 | 38491106 | A | 0 | 0 | G |
| 5 | BICF2G630184505 | 38500885 | G | 0 | 0 | A |
| 5 | BICF2G630184506 | 38502485 | A | 0 | 0 | G |
| 5 | BICF2G630184521 | 38523708 | A | 0 | 0 | G |
| 5 | BICF2G630184528 | 38531445 | A | 1 | 1 | G |
| 5 | BICF2G630184543 | 38542626 | A | 1 | 1 | G |
| 5 | BICF2G630184550 | 38545408 | A | 1 | 1 | G |
| 5 | BICF2G630184566 | 38555601 | A | 1 | 1 | G |
| 5 | BICF2S236913    | 38559980 | G | 0 | 0 | A |
| 5 | BICF2S23150704  | 38571041 | A | 0 | 0 | C |
| 5 | BICF2G630184589 | 38574354 | A | 1 | 1 | G |
| 5 | BICF2G630184598 | 38590200 | A | 0 | 0 | G |
| 5 | BICF2P871388    | 38600756 | G | 0 | 0 | A |
| 5 | BICF2P579191    | 38607039 | G | 0 | 0 | A |
| 5 | BICF2G630184611 | 38617168 | 0 | 0 | 0 | G |
| 5 | BICF2P1212067   | 38638060 | A | 0 | 0 | G |
| 5 | BICF2P389767    | 38643147 | G | 1 | 1 | A |
| 5 | BICF2S22958135  | 38655877 | G | 1 | 1 | A |
| 5 | BICF2P301964    | 38666847 | G | 1 | 1 | A |
| 5 | BICF2P934960    | 38675905 | G | 1 | 1 | A |
| 5 | BICF2P887730    | 38687309 | A | 0 | 0 | C |
| 5 | BICF2P887727    | 38688057 | A | 1 | 1 | G |
| 5 | BICF2P1001197   | 38703372 | G | 0 | 0 | A |
| 5 | BICF2P875587    | 38713660 | A | 1 | 1 | G |
| 5 | BICF2G630184621 | 38726120 | A | 0 | 0 | G |
| 5 | BICF2G630184625 | 38732273 | G | 0 | 0 | A |
| 5 | BICF2G630184635 | 38743889 | A | 0 | 0 | C |
| 5 | BICF2G630184645 | 38758791 | C | 1 | 1 | A |
| 5 | BICF2G630184683 | 38799914 | A | 0 | 0 | G |
| 5 | BICF2G630184692 | 38808874 | G | 0 | 0 | C |

|   |                 |          |   |   |   |   |
|---|-----------------|----------|---|---|---|---|
| 5 | BICF2G630184696 | 38820269 | G | 0 | 0 | A |
| 5 | BICF2G630184702 | 38834368 | A | 0 | 0 | G |
| 5 | BICF2P1420622   | 38839053 | A | 0 | 0 | G |
| 5 | BICF2P626493    | 38856340 | A | 0 | 0 | G |
| 5 | BICF2P219353    | 38868614 | T | 0 | 0 | A |
| 5 | BICF2P33190     | 38871634 | G | 0 | 0 | A |
| 5 | BICF2G630184732 | 38883786 | G | 0 | 0 | A |
| 5 | BICF2G630184745 | 38896505 | A | 0 | 0 | C |
| 5 | BICF2P887550    | 38914737 | G | 1 | 1 | A |
| 5 | BICF2G630184760 | 38916761 | A | 1 | 1 | G |
| 5 | BICF2P875786    | 38937989 | 0 | 0 | 0 | G |
| 5 | BICF2G630184774 | 38940745 | C | 0 | 0 | G |
| 5 | BICF2P273219    | 38954623 | 0 | 0 | 0 | A |
| 5 | BICF2G630184776 | 38963283 | A | 0 | 0 | G |
| 5 | BICF2G630184778 | 38980340 | A | 0 | 0 | C |
| 5 | BICF2G630184789 | 38989681 | G | 0 | 0 | A |
| 5 | BICF2G630184802 | 39000326 | A | 0 | 0 | G |
| 5 | BICF2P909109    | 39010970 | A | 0 | 0 | C |
| 5 | BICF2S2459689   | 39025380 | G | 1 | 1 | A |
| 5 | G339f35S50      | 39039930 | 0 | 0 | 0 | C |
| 5 | BICF2P485263    | 39062288 | G | 0 | 0 | A |
| 5 | BICF2G630184824 | 39067660 | A | 0 | 0 | G |
| 5 | BICF2P527630    | 39087221 | G | 0 | 0 | A |
| 5 | BICF2S2303153   | 39094325 | G | 0 | 0 | A |
| 5 | BICF2P1247185   | 39102104 | G | 0 | 0 | A |
| 5 | BICF2P1085370   | 39117210 | 0 | 0 | 0 | G |
| 5 | BICF2G630184848 | 39136415 | A | 0 | 0 | G |
| 5 | BICF2P1281226   | 39166404 | 0 | 0 | 0 | C |
| 5 | BICF2G630184850 | 39174454 | G | 0 | 0 | C |
| 5 | BICF2S23641943  | 39181509 | 0 | 0 | 0 | G |
| 5 | BICF2G630184853 | 39234378 | G | 0 | 0 | A |
| 5 | BICF2S23639279  | 39248207 | A | 0 | 0 | G |
| 5 | BICF2G630184865 | 39280769 | A | 1 | 1 | G |
| 5 | BICF2G630184870 | 39284390 | A | 0 | 0 | G |
| 5 | BICF2G630184875 | 39298279 | A | 0 | 0 | G |
| 5 | BICF2G630184881 | 39308506 | G | 0 | 0 | A |
| 5 | BICF2P937775    | 39334106 | G | 0 | 0 | A |
| 5 | BICF2P1373995   | 39341513 | G | 0 | 0 | A |
| 5 | BICF2P354334    | 39359652 | G | 0 | 0 | A |
| 5 | BICF2G630184900 | 39370825 | G | 0 | 0 | A |
| 5 | BICF2G630184903 | 39384667 | A | 0 | 0 | G |
| 5 | BICF2G630184907 | 39390411 | C | 0 | 0 | G |
| 5 | BICF2P282293    | 39400165 | G | 0 | 0 | A |
| 5 | BICF2G630184918 | 39413982 | C | 0 | 0 | G |
| 5 | BICF2P128827    | 39422818 | C | 1 | 1 | A |
| 5 | BICF2P1268557   | 39443480 | C | 0 | 0 | G |
| 5 | BICF2G630184924 | 39447402 | A | 0 | 0 | G |

|   |                        |          |   |   |   |   |
|---|------------------------|----------|---|---|---|---|
| 5 | BICF2G630184934        | 39460520 | G | 0 | 0 | A |
| 5 | BICF2G630184941        | 39466825 | C | 0 | 0 | A |
| 5 | BICF2G630184955        | 39487924 | G | 0 | 0 | A |
| 5 | BICF2G630184958        | 39491134 | C | 0 | 0 | A |
| 5 | BICF2P1072032          | 39506217 | A | 0 | 0 | G |
| 5 | BICF2P113131           | 39523653 | A | 0 | 0 | G |
| 5 | BICF2P172730           | 39542250 | A | 0 | 0 | G |
| 5 | BICF2S23015977         | 39553565 | A | 0 | 0 | G |
| 5 | BICF2P1246466          | 39562270 | A | 0 | 0 | G |
| 5 | BICF2P69171            | 39579110 | A | 0 | 0 | G |
| 5 | BICF2P69174            | 39579213 | G | 0 | 0 | A |
| 5 | BICF2P707262           | 39584458 | A | 0 | 0 | G |
| 5 | BICF2G630184973        | 39596209 | A | 0 | 0 | C |
| 5 | BICF2G630184974        | 39596323 | A | 0 | 0 | C |
| 5 | BICF2S23017937         | 39606164 | A | 0 | 0 | G |
| 5 | BICF2G630184995        | 39619136 | G | 0 | 0 | A |
| 5 | BICF2G630185003        | 39629615 | A | 0 | 0 | G |
| 5 | BICF2S23730174         | 39641254 | A | 0 | 0 | G |
| 5 | BICF2G630185015        | 39661283 | A | 0 | 0 | G |
| 5 | TIGRP2P70472_rs9080288 | 39678199 | 0 | 0 | 0 | G |
| 5 | BICF2G630185017        | 39703097 | A | 0 | 0 | G |
| 5 | BICF2P172591           | 39718358 | 0 | 0 | 0 | G |
| 5 | BICF2G630185022        | 39721987 | 0 | 0 | 0 | G |
| 5 | BICF2G630185029        | 39742084 | G | 0 | 0 | A |
| 5 | BICF2G630185036        | 39748358 | C | 0 | 0 | A |
| 5 | BICF2G630185055        | 39758138 | C | 1 | 1 | G |
| 5 | BICF2S24116278         | 39768477 | 0 | 0 | 0 | G |
| 5 | BICF2G630185060        | 39787536 | G | 0 | 0 | A |
| 5 | BICF2P900833           | 39791764 | 0 | 0 | 0 | A |
| 5 | BICF2G630185062        | 39837194 | G | 0 | 0 | A |
| 5 | BICF2G630185069        | 39847118 | A | 0 | 0 | G |
| 5 | BICF2G630185077        | 39849004 | G | 0 | 0 | A |
| 5 | BICF2G630185078        | 39849125 | A | 0 | 0 | G |
| 5 | BICF2P24480            | 39860925 | 0 | 0 | 0 | A |
| 5 | BICF2P933506           | 39883763 | A | 0 | 0 | G |
| 5 | BICF2P257525           | 39894275 | A | 1 | 1 | G |
| 5 | BICF2P174945           | 39909316 | G | 1 | 1 | A |
| 5 | BICF2G630185097        | 39922961 | 0 | 0 | 0 | G |
| 5 | BICF2G630185121        | 39942730 | G | 0 | 0 | A |
| 5 | BICF2G630185137        | 39953733 | G | 0 | 0 | A |
| 5 | BICF2S23648024         | 39965990 | G | 0 | 0 | A |
| 5 | BICF2G630185148        | 39976342 | A | 0 | 0 | C |
| 5 | BICF2G630185163        | 39993746 | G | 1 | 1 | A |
| 5 | BICF2G630185166        | 40000693 | A | 0 | 0 | G |
| 5 | BICF2P75883            | 40041289 | 0 | 0 | 0 | G |
| 5 | BICF2S23127907         | 40045102 | A | 0 | 0 | G |
| 5 | BICF2S23237409         | 40066370 | G | 1 | 1 | A |

|   |                 |          |   |   |        |   |
|---|-----------------|----------|---|---|--------|---|
| 5 | BICF2S23341074  | 40079424 | A | 1 | 1      | G |
| 5 | BICF2P740376    | 40095131 | 0 | 0 | 0      | G |
| 5 | BICF2S23347193  | 40116418 | A | 0 | 0      | G |
| 5 | BICF2G630185169 | 40123507 | 0 | 0 | 0      | T |
| 5 | BICF2P440245    | 40146100 | A | 1 | 1      | G |
| 5 | BICF2P862897    | 40148742 | A | 0 | 0      | G |
| 5 | BICF2P1402905   | 40164399 | G | 1 | 1      | A |
| 5 | BICF2P864238    | 40178240 | A | 1 | 1      | G |
| 5 | BICF2S23057646  | 40191847 | G | 1 | 1      | A |
| 5 | BICF2P743426    | 40203559 | G | 0 | 0      | A |
| 5 | BICF2S23440678  | 40215420 | A | 0 | 0      | G |
| 5 | BICF2P964815    | 40218819 | A | 0 | 0      | G |
| 5 | BICF2P173306    | 40227031 | A | 0 | 0      | C |
| 5 | BICF2S23144314  | 40246039 | A | 0 | 0      | G |
| 5 | BICF2P219390    | 40250934 | G | 0 | 0      | A |
| 5 | BICF2S23763062  | 40268848 | G | 0 | 0      | A |
| 5 | BICF2P118278    | 40269836 | A | 0 | 0      | G |
| 5 | BICF2S24110017  | 40273932 | A | 0 | 0      | G |
| 5 | BICF2S23634319  | 40292947 | A | 0 | 0      | G |
| 5 | BICF2S23634320  | 40293087 | A | 0 | 0      | G |
| 5 | BICF2S23356294  | 40297123 | G | 0 | 0      | A |
| 5 | BICF2S22923370  | 40316845 | G | 0 | 0      | A |
| 5 | BICF2S2321955   | 40325104 | A | 0 | 0      | G |
| 5 | BICF2P976309    | 40339283 | G | 0 | 0      | A |
| 5 | BICF2G630185190 | 40352191 | A | 0 | 0      | G |
| 5 | BICF2G630185199 | 40360278 | G | 0 | 0      | A |
| 5 | BICF2G630185210 | 40365446 | G | 0 | 0      | A |
| 5 | BICF2G630185224 | 40386823 | A | 0 | 0      | G |
| 5 | BICF2G630185225 | 40389950 | A | 0 | 0      | G |
| 5 | BICF2G630185238 | 40406273 | A | 0 | 0      | G |
| 5 | BICF2G630185241 | 40411376 | 0 | 0 | 0      | C |
| 5 | BICF2P948047    | 40411905 | 0 | 0 | 0      | G |
| 5 | BICF2P1232840   | 40431749 | A | 0 | 0.3571 | G |
| 5 | BICF2G630185255 | 40453665 | 0 | 0 | 0      | C |
| 5 | BICF2G630185266 | 40463862 | G | 0 | 0      | A |
| 5 | BICF2G630185277 | 40474772 | A | 0 | 0      | G |
| 5 | BICF2P548682    | 40480498 | A | 0 | 0      | C |
| 5 | BICF2G630185294 | 40492493 | A | 0 | 0      | G |
| 5 | BICF2G630185298 | 40505686 | C | 1 | 0.6429 | G |
| 5 | BICF2P953223    | 40525772 | A | 0 | 0.3571 | C |
| 5 | BICF2G630185334 | 40530268 | A | 0 | 0      | G |
| 5 | BICF2G630185374 | 40547873 | C | 0 | 0      | A |
| 5 | BICF2G630185381 | 40552195 | A | 0 | 0      | G |
| 5 | BICF2G630185389 | 40561273 | G | 0 | 0.3571 | A |
| 5 | BICF2G630185416 | 40573153 | G | 1 | 0.7    | A |
| 5 | BICF2G630185442 | 40584164 | G | 0 | 0.3571 | A |
| 5 | BICF2G630185475 | 40606486 | A | 0 | 0      | G |

|   |                        |          |   |   |        |   |
|---|------------------------|----------|---|---|--------|---|
| 5 | BICF2G630185490        | 40616981 | C | 0 | 0      | A |
| 5 | BICF2G630185491        | 40618237 | G | 0 | 0      | A |
| 5 | BICF2P709783           | 40640574 | T | 0 | 0.3571 | A |
| 5 | BICF2S23448260         | 40649273 | G | 0 | 0.3571 | A |
| 5 | BICF2S23448423         | 40652509 | A | 0 | 0.3571 | C |
| 5 | BICF2P83298            | 40668224 | G | 0 | 0.3571 | A |
| 5 | BICF2P370830           | 40678588 | O | 0 | 0      | G |
| 5 | BICF2P151703           | 40692078 | G | 1 | 0.6429 | A |
| 5 | BICF2G630185562        | 40708214 | G | 0 | 0      | A |
| 5 | BICF2G630185614        | 40716559 | A | 1 | 0.6429 | G |
| 5 | BICF2G630185617        | 40727608 | A | 0 | 0      | G |
| 5 | BICF2G630185621        | 40733573 | A | 1 | 0.6429 | G |
| 5 | BICF2G630185630        | 40746782 | A | 0 | 0      | G |
| 5 | BICF2G630185640        | 40758915 | A | 0 | 0      | G |
| 5 | BICF2P513069           | 40776571 | A | 0 | 0      | G |
| 5 | BICF2G630185657        | 40778736 | A | 0 | 0      | G |
| 5 | BICF2G630185666        | 40781089 | A | 0 | 0      | G |
| 5 | BICF2S236331           | 40803331 | O | 0 | 0      | G |
| 5 | BICF2P512787           | 40821224 | A | 0 | 0.3571 | C |
| 5 | BICF2G630185725        | 40827188 | G | 0 | 0.3571 | A |
| 5 | BICF2G630185754        | 40853871 | G | 0 | 0      | C |
| 5 | BICF2G630185758        | 40859918 | G | 0 | 0      | A |
| 5 | TIGRP2P70482_rs9124925 | 40877377 | O | 0 | 0      | G |
| 5 | BICF2G630185771        | 40886029 | G | 0 | 0      | A |
| 5 | BICF2G630185774        | 40894606 | C | 0 | 0      | A |
| 5 | BICF2G630185787        | 40905773 | G | 1 | 0.6429 | A |
| 5 | BICF2G630185802        | 40919843 | C | 1 | 0.6429 | A |
| 5 | BICF2S2308493          | 40935023 | C | 0 | 0      | A |
| 5 | BICF2G630185816        | 40950354 | A | 0 | 0      | G |
| 5 | BICF2G630185826        | 40952673 | A | 0 | 0      | G |
| 5 | BICF2P682357           | 40965077 | G | 0 | 0      | A |
| 5 | BICF2G630185860        | 40977364 | C | 0 | 0      | A |
| 5 | BICF2G630185885        | 40994094 | G | 0 | 0      | A |
| 5 | BICF2G630185897        | 40998333 | A | 0 | 0      | G |
| 5 | BICF2G630185919        | 41011517 | G | 0 | 0      | C |
| 5 | BICF2G630185948        | 41028708 | A | 0 | 0      | C |
| 5 | BICF2G630185956        | 41038084 | A | 0 | 0.3333 | C |
| 5 | BICF2G630185964        | 41045480 | A | 1 | 1      | G |
| 5 | BICF2G630185974        | 41055278 | A | 1 | 0.6429 | G |
| 5 | BICF2G630186008        | 41074007 | A | 1 | 1      | G |
| 5 | BICF2S23444652         | 41093413 | A | 0 | 0      | G |
| 5 | BICF2G630186024        | 41107067 | G | 0 | 0      | A |
| 5 | BICF2G630186032        | 41116843 | G | 1 | 1      | A |
| 5 | BICF2G630186046        | 41128879 | A | 1 | 0.6429 | G |
| 5 | BICF2S23120140         | 41146472 | A | 0 | 0      | G |
| 5 | BICF2S23549913         | 41159832 | G | 0 | 0      | A |
| 5 | BICF2G630186048        | 41179801 | G | 0 | 0.3571 | A |

|   |                        |          |   |   |        |   |
|---|------------------------|----------|---|---|--------|---|
| 5 | BICF2S23112756         | 41191729 | A | 0 | 0      | G |
| 5 | BICF2S23715617         | 41200003 | C | 0 | 0      | A |
| 5 | BICF2S22920330         | 41237038 | A | 0 | 0      | C |
| 5 | BICF2S22965002         | 41242928 | A | 0 | 0      | G |
| 5 | BICF2S23711084         | 41257313 | G | 0 | 0      | A |
| 5 | BICF2S22963621         | 41262494 | C | 0 | 0      | A |
| 5 | BICF2P206170           | 41278284 | A | 1 | 0.6429 | G |
| 5 | BICF2P314107           | 41289767 | 0 | 0 | 0      | G |
| 5 | BICF2S244621           | 41300215 | C | 0 | 0      | A |
| 5 | BICF2P193342           | 41317118 | 0 | 0 | 0      | G |
| 5 | BICF2P320722           | 41320363 | 0 | 0 | 0      | A |
| 5 | BICF2P806751           | 41345473 | 0 | 0 | 0      | A |
| 5 | BICF2P509731           | 41358055 | 0 | 0 | 0      | A |
| 5 | BICF2G630186061        | 41369703 | G | 0 | 0      | A |
| 5 | BICF2G630186064        | 41385129 | A | 1 | 1      | G |
| 5 | BICF2G630186079        | 41404963 | A | 1 | 0.6429 | C |
| 5 | BICF2G630186094        | 41411815 | A | 1 | 0.6429 | G |
| 5 | BICF2G630186106        | 41425649 | G | 0 | 0      | A |
| 5 | BICF2S23714222         | 41444144 | A | 0 | 0      | G |
| 5 | BICF2P237050           | 41462639 | A | 1 | 1      | G |
| 5 | BICF2G630186171        | 41472065 | A | 0 | 0      | G |
| 5 | BICF2G630186180        | 41480845 | G | 0 | 0      | A |
| 5 | BICF2G630186182        | 41481189 | A | 0 | 0      | G |
| 5 | BICF2G630186215        | 41496464 | G | 0 | 0      | A |
| 5 | BICF2G630186224        | 41505178 | A | 0 | 0      | G |
| 5 | BICF2G630186239        | 41524158 | A | 0 | 0      | C |
| 5 | BICF2G630186251        | 41528401 | A | 0 | 0      | G |
| 5 | BICF2G630186279        | 41551076 | T | 0 | 0      | A |
| 5 | BICF2P439713           | 41564157 | G | 0 | 0      | A |
| 5 | BICF2G630186301        | 41575639 | C | 0 | 0      | A |
| 5 | BICF2P1125615          | 41586812 | A | 0 | 0      | G |
| 5 | BICF2G630186303        | 41596934 | A | 0 | 0      | G |
| 5 | BICF2P681858           | 41610826 | G | 0 | 0      | C |
| 5 | BICF2S23340102         | 41625388 | G | 0 | 0      | A |
| 5 | TIGRP2P70542_rs9158013 | 41641465 | G | 0 | 0      | A |
| 5 | BICF2S2441921          | 41643035 | C | 0 | 0      | A |
| 5 | BICF2P1408286          | 41663705 | G | 0 | 0      | A |
| 5 | TIGRP2P70555_rs8536328 | 41665006 | C | 0 | 0      | A |
| 5 | TIGRP2P70559_rs8710169 | 41678942 | G | 0 | 0      | A |
| 5 | BICF2G630186310        | 41690223 | 0 | 0 | 0      | A |
| 5 | BICF2G630186325        | 41699670 | A | 0 | 0      | G |
| 5 | BICF2P309143           | 41713520 | G | 0 | 0.3571 | A |
| 5 | BICF2G630186332        | 41717160 | A | 0 | 0      | G |
| 5 | BICF2G630186351        | 41730505 | A | 1 | 1      | G |
| 5 | BICF2G630186354        | 41737933 | G | 0 | 0      | A |
| 5 | BICF2P645920           | 41749654 | A | 0 | 0      | G |
| 5 | TIGRP2P70595_rs9042416 | 41766902 | A | 0 | 0      | G |

|   |                        |          |   |   |        |   |
|---|------------------------|----------|---|---|--------|---|
| 5 | BICF2G630186387        | 41769809 | G | 0 | 0      | A |
| 5 | BICF2G630186400        | 41788357 | A | 0 | 0      | G |
| 5 | BICF2P266158           | 41791042 | A | 0 | 0      | G |
| 5 | BICF2P266162           | 41791761 | G | 0 | 0      | A |
| 5 | TIGRP2P70630_rs8733196 | 41806120 | A | 0 | 0      | G |
| 5 | BICF2P182887           | 41822825 | A | 0 | 0      | G |
| 5 | TIGRP2P70640_rs8831120 | 41845687 | C | 1 | 0.6429 | A |
| 5 | BICF2P223980           | 41859458 | C | 1 | 0.6429 | G |
| 5 | BICF2P223979           | 41859667 | A | 1 | 0.6429 | G |
| 5 | BICF2P211633           | 41863092 | A | 1 | 0.6429 | C |
| 5 | BICF2P216771           | 41877056 | A | 0 | 0.3571 | C |
| 5 | BICF2P647721           | 41885844 | G | 0 | 0.3571 | A |
| 5 | BICF2P1414260          | 41896366 | A | 0 | 0      | G |
| 5 | BICF2P1079376          | 41908306 | G | 0 | 0      | A |
| 5 | BICF2P345420           | 41919294 | G | 1 | 0.6667 | A |
| 5 | BICF2P726422           | 41934494 | A | 1 | 0.6429 | G |
| 5 | BICF2P621331           | 41945851 | A | 0 | 0      | G |
| 5 | BICF2P269131           | 41956356 | G | 0 | 0      | A |
| 5 | TIGRP2P70690_rs8985094 | 41965452 | A | 1 | 1      | G |
| 5 | BICF2P225206           | 41978918 | G | 1 | 1      | A |
| 5 | BICF2P363932           | 41997987 | A | 0 | 0      | G |
| 5 | BICF2G630186413        | 42000988 | G | 0 | 0      | A |
| 5 | BICF2P555882           | 42018918 | G | 0 | 0      | A |
| 5 | BICF2P329738           | 42024607 | A | 0 | 0      | G |
| 5 | TIGRP2P70716_rs8856320 | 42035734 | A | 0 | 0      | G |
| 5 | TIGRP2P70719_rs9094935 | 42046057 | G | 0 | 0      | A |
| 5 | TIGRP2P70721_rs9147066 | 42059750 | A | 0 | 0      | G |
| 5 | BICF2P394905           | 42079112 | G | 0 | 0      | A |
| 5 | TIGRP2P70736_rs9186315 | 42094433 | A | 0 | 0      | G |
| 5 | BICF2P271975           | 42107650 | 0 | 0 | 0      | T |
| 5 | BICF2P940891           | 42119094 | G | 0 | 0.3571 | A |
| 5 | BICF2P1023313          | 42132476 | G | 0 | 0.3571 | A |
| 5 | TIGRP2P70746_rs9194124 | 42139804 | A | 0 | 0.3571 | G |
| 5 | BICF2S24512133         | 42155332 | G | 0 | 0.3571 | A |
| 5 | BICF2P441608           | 42166617 | A | 0 | 0      | G |
| 5 | TIGRP2P70748_rs9204968 | 42191132 | G | 0 | 0      | A |
| 5 | TIGRP2P70751_rs8741611 | 42199692 | G | 0 | 0.3571 | A |
| 5 | TIGRP2P70756_rs8657816 | 42209697 | A | 0 | 0      | G |
| 5 | BICF2P1470873          | 42224401 | G | 0 | 0      | A |
| 5 | BICF2P434000           | 42230987 | C | 0 | 0.3571 | G |
| 5 | BICF2P523055           | 42246436 | A | 0 | 0      | T |
| 5 | BICF2P229103           | 42273904 | 0 | 0 | 0      | A |
| 5 | BICF2G630186423        | 42312538 | A | 0 | 0      | G |
| 5 | BICF2P256438           | 42352599 | 0 | 0 | 0      | A |
| 5 | BICF2P1054108          | 42361791 | A | 0 | 0      | G |
| 5 | BICF2P430858           | 42391295 | 0 | 0 | 0      | G |
| 5 | BICF2P1195929          | 42410907 | 0 | 0 | 0      | G |

|   |                        |          |   |    |        |   |
|---|------------------------|----------|---|----|--------|---|
| 5 | BICF2S23129951         | 42419630 | A | 0  | 0.3571 | G |
| 5 | BICF2S23761118         | 42426988 | A | 0  | 0.3333 | G |
| 5 | TIGRP2P70766_rs8607439 | 42447798 | C | 0  | 0.3571 | G |
| 5 | BICF2P777938           | 42453935 | A | 0  | 0.3571 | C |
| 5 | BICF2P422007           | 42455159 | A | 0  | 0      | G |
| 5 | BICF2S23237413         | 42466640 | A | 0  | 0.3571 | C |
| 5 | BICF2S229680           | 42472747 | A | 0  | 0      | G |
| 5 | BICF2P1078254          | 42483441 | A | 0  | 0      | G |
| 5 | TIGRP2P70775_rs9120494 | 42498418 | 0 | 0  | 0      | C |
| 5 | TIGRP2P70776_rs9130739 | 42506503 | A | 0  | 0      | G |
| 5 | BICF2G630186424        | 42571631 | A | 0  | 0      | T |
| 5 | BICF2P37723            | 42582241 | G | 0  | 0      | A |
| 5 | BICF2S22950038         | 42614306 | G | 0  | 0      | A |
| 5 | BICF2S23714382         | 42621129 | A | 0  | 0      | G |
| 5 | BICF2S23022881         | 42634661 | C | 0  | 0      | G |
| 5 | BICF2P253667           | 42643469 | 0 | 0  | 0      | G |
| 5 | BICF2S23732327         | 42669448 | A | 0  | 0      | G |
| 5 | BICF2P1293791          | 42687053 | 0 | 0  | 0      | C |
| 5 | BICF2P257464           | 42718007 | 0 | 0  | 0      | A |
| 5 | BICF2S22928611         | 42735086 | A | 0  | 0      | G |
| 5 | BICF2P343582           | 42772325 | 0 | 0  | 0      | A |
| 5 | BICF2P635605           | 42811058 | 0 | 0  | 0      | G |
| 5 | BICF2P701721           | 42824856 | 0 | 0  | 0      | C |
| 5 | TIGRP2P70795_rs8826446 | 42858157 | 0 | 0  | 0      | A |
| 5 | BICF2P768879           | 42869858 | 0 | 0  | 0      | A |
| 5 | TIGRP2P70797_rs8708908 | 42875792 | 0 | 0  | 0      | A |
| 5 | BICF2S23161529         | 42892497 | A | 0  | 0      | G |
| 5 | BICF2P429559           | 42903803 | 0 | 0  | 0      | A |
| 5 | BICF2P1176440          | 42907773 | C | 1  | 1      | A |
| 5 | BICF2P683055           | 42922739 | A | NA | NA     | G |
| 5 | BICF2P1238614          | 42937434 | G | 0  | 0      | A |
| 5 | TIGRP2P70805_rs8717739 | 42946941 | A | 0  | 0      | C |
| 5 | BICF2P1119048          | 42974065 | A | 0  | 0      | T |
| 5 | BICF2P1341365          | 42976185 | A | 0  | 0      | G |
| 5 | BICF2P1356047          | 42993653 | A | 0  | 0      | G |
| 5 | BICF2P753299           | 43020550 | A | 0  | 0      | G |
| 5 | BICF2S23741924         | 43029020 | G | 1  | 1      | A |
| 5 | BICF2S22952409         | 43038096 | G | 1  | 1      | A |
| 5 | BICF2P596088           | 43051311 | A | 1  | 0.6429 | C |
| 5 | BICF2P1120589          | 43080676 | A | 0  | 0      | G |
| 5 | BICF2P727196           | 43103765 | G | 0  | 0      | C |
| 5 | TIGRP2P70849_rs8612351 | 43119082 | A | 0  | 0.3571 | G |
| 5 | BICF2P1427483          | 43128054 | A | 0  | 0      | G |
| 5 | BICF2P310590           | 43142761 | A | 0  | 0      | G |
| 5 | BICF2P937003           | 43150186 | 0 | 0  | 0      | G |
| 5 | BICF2P338952           | 43164475 | A | 0  | 0      | G |
| 5 | BICF2G630186426        | 43176690 | 0 | 0  | 0      | A |



|   |                        |          |   |   |        |   |
|---|------------------------|----------|---|---|--------|---|
| 5 | BICF2S23419705         | 43202747 | A | 1 | 0.6429 | G |
| 5 | BICF2P1356360          | 43227275 | G | 0 | 0      | A |
| 5 | BICF2P758787           | 43231868 | C | 0 | 0      | G |
| 5 | TIGRP2P70866_rs8870723 | 43245970 | G | 0 | 0.3571 | A |
| 5 | BICF2P1000375          | 43261526 | A | 0 | 0.3571 | C |
| 5 | BICF2P292425           | 43267073 | A | 0 | 0.3571 | G |
| 5 | TIGRP2P70876_rs9139741 | 43276128 | A | 0 | 0.3571 | G |
| 5 | TIGRP2P70882_rs8673006 | 43294294 | A | 0 | 0      | G |
| 5 | BICF2P289423           | 43297626 | G | 0 | 0      | A |
| 5 | BICF2S23139937         | 43320461 | G | 0 | 0.3571 | A |
| 5 | BICF2P96875            | 43333733 | G | 0 | 0.3571 | A |
| 5 | TIGRP2P70903_rs8740143 | 43347687 | G | 0 | 0.3571 | A |
| 5 | BICF2P1334728          | 43358922 | A | 0 | 0      | G |
| 5 | TIGRP2P70907_rs8959367 | 43377265 | 0 | 0 | 0      | C |
| 5 | G342f53S228            | 43388939 | 0 | 0 | 0      | G |
| 5 | TIGRP2P70908_rs8673568 | 43391456 | C | 0 | 0      | A |
| 5 | TIGRP2P70910_rs9104870 | 43409523 | G | 0 | 0      | A |
| 5 | BICF2P1039167          | 43417843 | G | 0 | 0      | A |
| 5 | BICF2P1039165          | 43419543 | G | 0 | 0.3571 | A |
| 5 | BICF2S24116593         | 43426969 | 0 | 0 | 0      | G |
| 5 | BICF2S23162446         | 43441719 | A | 0 | 0.3571 | G |
| 5 | BICF2P1391141          | 43452070 | A | 0 | 0.3571 | C |
| 5 | BICF2P194103           | 43461715 | G | 0 | 0.3571 | A |
| 5 | BICF2P290705           | 43475080 | G | 0 | 0.3571 | A |
| 5 | TIGRP2P70925_rs8835810 | 43486480 | A | 0 | 0.3571 | G |
| 5 | BICF2P914791           | 43486543 | A | 0 | 0      | G |
| 5 | TIGRP2P70926_rs8619729 | 43489683 | A | 0 | 0.3571 | G |
| 5 | BICF2P1283967          | 43490133 | G | 0 | 0.3571 | A |
| 5 | TIGRP2P70931_rs8620298 | 43499913 | A | 0 | 0.3333 | G |
| 5 | BICF2P154619           | 43509876 | G | 0 | 0.3571 | C |
| 5 | BICF2S2316820          | 43521313 | C | 0 | 0.3333 | A |
| 5 | BICF2S22946142         | 43538690 | 0 | 0 | 0      | C |
| 5 | BICF2S23712651         | 43574834 | A | 0 | 0      | G |
| 5 | BICF2S23127046         | 43596112 | 0 | 0 | 0      | G |
| 5 | BICF2P591505           | 43612855 | A | 0 | 0.3571 | G |
| 5 | BICF2P1025058          | 43624678 | A | 0 | 0.3571 | G |
| 5 | BICF2S23719316         | 43633059 | G | 0 | 0.3571 | A |
| 5 | BICF2S2446554          | 43647582 | 0 | 0 | 0      | G |
| 5 | BICF2P78778            | 43668332 | 0 | 0 | 0      | G |
| 5 | BICF2S2318341          | 43677675 | G | 0 | 0.3571 | A |
| 5 | BICF2S23516038         | 43688883 | T | 0 | 0.3571 | A |
| 5 | BICF2P906984           | 43704781 | 0 | 0 | 0      | G |
| 5 | G343f37S21             | 43731084 | G | 0 | 0      | A |
| 5 | BICF2S23135376         | 43753642 | G | 0 | 0.2857 | A |
| 5 | BICF2S2362355          | 43791024 | G | 0 | 0.2857 | A |
| 5 | TIGRP2P70983_rs8602715 | 43797131 | 0 | 0 | 0      | C |
| 5 | TIGRP2P70984_rs8618055 | 43808558 | 0 | 0 | 0      | A |

|   |                        |          |   |   |        |   |
|---|------------------------|----------|---|---|--------|---|
| 5 | BICF2P716067           | 43843342 | G | 0 | 0.2857 | A |
| 5 | BICF2P352386           | 43864668 | 0 | 0 | 0      | C |
| 5 | TIGRP2P70993_rs8824848 | 43887324 | A | 0 | 0      | G |
| 5 | BICF2S2314059          | 43899193 | A | 0 | 0      | G |
| 5 | BICF2P993275           | 43914843 | A | 0 | 0      | C |
| 5 | BICF2P760674           | 43928291 | G | 0 | 0.2857 | A |
| 5 | BICF2P1281968          | 43933979 | G | 1 | 1      | A |
| 5 | BICF2P871850           | 43950557 | C | 0 | 0      | A |
| 5 | BICF2G630186433        | 43956581 | 0 | 0 | 0      | C |
| 5 | BICF2S23529389         | 43972174 | A | 0 | 0      | G |
| 5 | BICF2P712925           | 43981803 | A | 0 | 0.2857 | G |
| 5 | BICF2P592511           | 44000344 | 0 | 0 | 0      | G |
| 5 | BICF2P1413613          | 44020376 | G | 0 | 0      | A |
| 5 | BICF2P1108505          | 44030449 | G | 0 | 0      | A |
| 5 | BICF2P703663           | 44047600 | A | 1 | 0.7143 | G |
| 5 | TIGRP2P71030_rs9013592 | 44057317 | C | 0 | 0      | A |
| 5 | BICF2P58200            | 44078797 | G | 0 | 0      | A |
| 5 | TIGRP2P71054_rs8629930 | 44085571 | A | 0 | 0      | G |
| 5 | TIGRP2P71063_rs8965943 | 44108553 | 0 | 0 | 0      | A |
| 5 | BICF2P997736           | 44117925 | A | 0 | 0      | G |
| 5 | BICF2P1070583          | 44131651 | C | 1 | 1      | G |
| 5 | BICF2P41192            | 44146070 | A | 0 | 0      | G |
| 5 | BICF2P170755           | 44149035 | G | 0 | 0      | A |
| 5 | BICF2P1425957          | 44169481 | C | 1 | 0.7143 | A |
| 5 | TIGRP2P71072_rs9073129 | 44179705 | A | 0 | 0      | C |
| 5 | BICF2P211464           | 44183777 | C | 0 | 0      | A |
| 5 | TIGRP2P71085_rs8828691 | 44205757 | A | 0 | 0      | T |
| 5 | TIGRP2P71086_rs9053099 | 44223626 | A | 0 | 0      | G |
| 5 | BICF2P862464           | 44231887 | A | 0 | 0.2857 | G |
| 5 | BICF2P831393           | 44241926 | A | 0 | 0.2857 | G |
| 5 | BICF2P633912           | 44257555 | A | 0 | 0      | G |
| 5 | BICF2P1055821          | 44270437 | G | 1 | 0.7143 | A |
| 5 | BICF2P1055820          | 44270665 | A | 1 | 0.7143 | G |
| 5 | BICF2P1300835          | 44276420 | G | 1 | 0.7143 | A |
| 5 | BICF2P543784           | 44288432 | C | 1 | 0.7143 | A |
| 5 | BICF2P764356           | 44309705 | A | 1 | 0.7143 | G |
| 5 | BICF2P374997           | 44321099 | A | 0 | 0      | G |
| 5 | BICF2P1177298          | 44341037 | A | 1 | 0.7143 | G |
| 5 | BICF2P161242           | 44354530 | 0 | 0 | 0      | A |
| 5 | BICF2P161245           | 44355096 | 0 | 0 | 0      | G |
| 5 | BICF2P1098323          | 44360593 | G | 1 | 0.7143 | A |
| 5 | TIGRP2P71121_rs8749800 | 44369645 | C | 0 | 0      | A |
| 5 | BICF2P1040388          | 44386425 | 0 | 0 | 0      | G |
| 5 | TIGRP2P71134_rs8995432 | 44393739 | C | 0 | 0      | A |
| 5 | BICF2P1246411          | 44406005 | A | 0 | 0      | G |
| 5 | BICF2P1426462          | 44416208 | A | 0 | 0      | G |
| 5 | BICF2P1091500          | 44435870 | A | 0 | 0.2857 | G |

|   |                        |          |   |   |        |   |
|---|------------------------|----------|---|---|--------|---|
| 5 | TIGRP2P71148_rs9045255 | 44447167 | G | 1 | 0.7143 | A |
| 5 | BICF2P1065249          | 44458340 | A | 0 | 0.2857 | G |
| 5 | BICF2P1127037          | 44461758 | A | 0 | 0      | G |
| 5 | BICF2P140730           | 44477113 | A | 1 | 0.7143 | G |
| 5 | BICF2P694183           | 44502381 | G | 1 | 1      | A |
| 5 | BICF2S2304979          | 44515583 | A | 0 | 0.2857 | G |
| 5 | BICF2P1122683          | 44518399 | G | 1 | 1      | A |
| 5 | TIGRP2P71160_rs8830132 | 44531121 | A | 1 | 1      | G |
| 5 | BICF2P1469672          | 44542628 | G | 1 | 0.7143 | A |
| 5 | BICF2S24114334         | 44557832 | A | 1 | 0.7143 | G |
| 5 | BICF2P667702           | 44563520 | A | 1 | 0.7143 | G |
| 5 | BICF2P1224829          | 44579495 | G | 1 | 0.7143 | A |
| 5 | BICF2S2445944          | 44585680 | G | 1 | 0.7143 | A |
| 5 | BICF2P252588           | 44586151 | A | 1 | 0.7143 | G |
| 5 | BICF2P773172           | 44606853 | A | 1 | 0.7143 | G |
| 5 | BICF2P1173109          | 44610945 | A | 1 | 0.7143 | G |
| 5 | TIGRP2P71190_rs8688242 | 44618000 | A | 1 | 0.7143 | G |
| 5 | TIGRP2P71191_rs8963019 | 44624964 | A | 1 | 0.7143 | G |
| 5 | BICF2P464664           | 44634112 | A | 1 | 0.7143 | C |
| 5 | BICF2P86247            | 44644679 | 0 | 0 | 0      | G |
| 5 | BICF2P764192           | 44661096 | 0 | 0 | 0      | G |
| 5 | BICF2P397305           | 44675224 | C | 0 | 0      | G |
| 5 | BICF2P790965           | 44681461 | A | 1 | 0.7143 | G |
| 5 | BICF2P564534           | 44689109 | A | 1 | 0.7143 | G |
| 5 | TIGRP2P71206_rs8740239 | 44701598 | 0 | 0 | 0      | C |
| 5 | BICF2P1168121          | 44733392 | A | 0 | 0      | G |
| 5 | BICF2P473627           | 44741643 | 0 | 0 | 0      | C |
| 5 | TIGRP2P71207_rs8548472 | 44757342 | 0 | 0 | 0      | G |
| 5 | BICF2P507511           | 44764263 | 0 | 0 | 0      | G |
| 5 | BICF2P703930           | 44788911 | A | 0 | 0      | C |
| 5 | BICF2P426604           | 44793994 | 0 | 0 | 0      | A |
| 5 | TIGRP2P71213_rs9156976 | 44810504 | A | 0 | 0      | G |
| 5 | TIGRP2P71216_rs8563499 | 44818855 | A | 0 | 0      | G |
| 5 | BICF2P74407            | 44829938 | G | 0 | 0      | A |
| 5 | BICF2P254361           | 44847121 | 0 | 0 | 0      | G |
| 5 | BICF2P374635           | 44870564 | 0 | 0 | 0      | C |
| 5 | BICF2P167552           | 44880153 | A | 1 | 0.7143 | C |
| 5 | BICF2P881350           | 44894115 | A | 1 | 0.7143 | G |
| 5 | BICF2P341199           | 44897493 | G | 1 | 0.7143 | A |
| 5 | BICF2P330613           | 44917551 | A | 1 | 0.7143 | G |
| 5 | BICF2P733704           | 44939843 | A | 1 | 0.7143 | G |
| 5 | BICF2P1022878          | 44944533 | G | 1 | 0.7143 | A |
| 5 | BICF2P209879           | 44958674 | A | 0 | 0.2857 | G |
| 5 | BICF2P1256881          | 44965608 | A | 0 | 0.2857 | G |
| 5 | BICF2S23646053         | 44978999 | T | 1 | 0.7143 | A |
| 5 | BICF2P1076079          | 44982158 | A | 1 | 0.7143 | C |
| 5 | BICF2P264710           | 44990396 | G | 1 | 0.7143 | A |

|   |                        |          |   |   |        |   |
|---|------------------------|----------|---|---|--------|---|
| 5 | BICF2S23130606         | 45007528 | A | 0 | 0      | G |
| 5 | BICF2P769053           | 45008619 | G | 1 | 0.7143 | A |
| 5 | TIGRP2P71274_rs8563921 | 45021363 | 0 | 0 | 0      | A |
| 5 | BICF2P1368808          | 45022579 | A | 0 | 0      | G |
| 5 | BICF2S2328056          | 45035865 | G | 0 | 0      | C |
| 5 | BICF2P1135793          | 45039575 | G | 0 | 0      | A |
| 5 | BICF2P1253115          | 45047863 | A | 0 | 0      | C |
| 5 | BICF2P1293078          | 45068348 | G | 0 | 0      | A |
| 5 | BICF2P1293073          | 45069181 | C | 0 | 0      | G |
| 5 | BICF2P243681           | 45086157 | 0 | 0 | 0      | C |
| 5 | TIGRP2P71276_rs8965891 | 45100786 | 0 | 0 | 0      | G |
| 5 | BICF2P168367           | 45118982 | C | 0 | 0.2857 | A |
| 5 | BICF2P599846           | 45138131 | G | 0 | 0.2857 | A |
| 5 | BICF2P1166160          | 45151323 | A | 0 | 0.2857 | G |
| 5 | BICF2P1055722          | 45162144 | G | 0 | 0.2857 | A |
| 5 | BICF2P1099142          | 45181080 | G | 0 | 0.2857 | A |
| 5 | BICF2P622213           | 45184489 | C | 0 | 0.2857 | A |
| 5 | BICF2P937318           | 45196265 | G | 0 | 0.125  | A |
| 5 | BICF2P163563           | 45217395 | G | 0 | 0.2857 | A |
| 5 | BICF2S233727           | 45230494 | C | 0 | 0.2857 | A |
| 5 | BICF2P1330462          | 45242984 | 0 | 0 | 0      | A |
| 5 | TIGRP2P71279_rs8590046 | 45243339 | 0 | 0 | 0      | G |
| 5 | BICF2P967078           | 45257690 | A | 0 | 0      | G |
| 5 | BICF2S2321350          | 45272650 | A | 0 | 0      | G |
| 5 | BICF2P1412083          | 45282726 | A | 0 | 0      | G |
| 5 | BICF2P789003           | 45290858 | A | 0 | 0      | G |
| 5 | BICF2P998380           | 45308409 | G | 0 | 0.2857 | A |
| 5 | BICF2S23018364         | 45312776 | A | 0 | 0.2857 | G |
| 5 | BICF2P917537           | 45334656 | A | 0 | 0      | G |
| 5 | BICF2P1202106          | 45370446 | A | 0 | 0.2857 | C |
| 5 | BICF2S2323662          | 45382916 | A | 1 | 0.7143 | G |
| 5 | BICF2P882771           | 45395079 | A | 0 | 0      | G |
| 5 | G344f43S206            | 45434757 | A | 0 | 0      | G |
| 5 | G344f47S123            | 45439830 | A | 0 | 0      | G |
| 5 | BICF2P1188677          | 45472932 | 0 | 0 | 0      | G |
| 5 | BICF2S23443985         | 45499341 | A | 0 | 0      | C |
| 5 | BICF2P544205           | 45511883 | 0 | 0 | 0      | A |
| 5 | BICF2P600330           | 45534451 | G | 0 | 0      | A |
| 5 | BICF2P527008           | 45550138 | 0 | 0 | 0      | G |
| 5 | G345f13S257            | 45576890 | G | 0 | 0.2857 | A |
| 5 | BICF2P825145           | 45603573 | 0 | 0 | 0      | C |
| 5 | BICF2P710637           | 45636986 | 0 | 0 | 0      | G |
| 5 | BICF2S2307645          | 45661442 | A | 0 | 0.2857 | G |
| 5 | G346f51S28             | 45698126 | C | 0 | 0.2857 | G |
| 5 | BICF2P455389           | 45723828 | 0 | 0 | 0      | C |
| 5 | BICF2P7464             | 45729524 | 0 | 0 | 0      | G |
| 5 | TIGRP2P71289_rs8899736 | 45735996 | 0 | 0 | 0      | A |

|   |                        |          |   |   |        |   |
|---|------------------------|----------|---|---|--------|---|
| 5 | BICF2P1201551          | 45757632 | G | 0 | 0      | A |
| 5 | BICF2P116993           | 45763276 | 0 | 0 | 0      | G |
| 5 | BICF2P298304           | 45778362 | 0 | 0 | 0      | A |
| 5 | TIGRP2P71292_rs8962905 | 45792882 | 0 | 0 | 0      | A |
| 5 | BICF2P707836           | 45795172 | A | 0 | 0      | G |
| 5 | BICF2P518930           | 45821184 | 0 | 0 | 0      | G |
| 5 | BICF2S22928795         | 45839465 | G | 0 | 0.2857 | A |
| 5 | BICF2P476564           | 45855194 | A | 1 | 0.7143 | G |
| 5 | BICF2P428095           | 45863257 | 0 | 0 | 0      | A |
| 5 | BICF2S23331634         | 45922522 | A | 1 | 0.7143 | G |
| 5 | BICF2S2413183          | 45935460 | G | 0 | 0      | A |
| 5 | BICF2P309812           | 45953835 | C | 1 | 1      | A |
| 5 | BICF2S23133529         | 45980016 | G | 1 | 1      | A |
| 5 | BICF2G630186638        | 45989240 | G | 1 | 1      | A |
| 5 | BICF2G630186647        | 46004305 | G | 1 | 1      | A |
| 5 | BICF2G630186657        | 46015372 | G | 1 | 1      | A |
| 5 | BICF2G630186658        | 46025287 | A | 0 | 0      | G |
| 5 | BICF2G630186668        | 46041552 | G | 1 | 1      | A |
| 5 | BICF2G630186696        | 46062303 | A | 1 | 1      | G |
| 5 | BICF2G630186718        | 46072535 | A | 1 | 1      | G |
| 5 | BICF2G630186735        | 46079166 | A | 1 | 1      | C |
| 5 | BICF2G630186743        | 46083925 | G | 1 | 1      | A |
| 5 | BICF2G630186763        | 46106356 | A | 0 | 0      | G |
| 5 | BICF2P129904           | 46128551 | 0 | 0 | 0      | A |
| 5 | BICF2G630186777        | 46158109 | A | 0 | 0      | C |
| 5 | BICF2G630186779        | 46168185 | C | 0 | 0      | A |
| 5 | BICF2P1375880          | 46181807 | A | 0 | 0      | C |
| 5 | BICF2G630186791        | 46217490 | G | 0 | 0      | A |
| 5 | BICF2G630186795        | 46222474 | G | 0 | 0      | A |
| 5 | BICF2G630186833        | 46245603 | A | 0 | 0      | C |
| 5 | BICF2P274180           | 46249714 | A | 0 | 0      | G |
| 5 | BICF2P1392393          | 46250407 | A | 0 | 0      | G |
| 5 | BICF2G630186851        | 46258320 | A | 0 | 0      | G |
| 5 | BICF2S23524531         | 46264506 | C | 0 | 0      | A |
| 5 | TIGRP2P71427_rs8866516 | 46309692 | 0 | 0 | 0      | T |
| 5 | BICF2G630186869        | 46315900 | 0 | 0 | 0      | G |
| 5 | BICF2S2367641          | 46340032 | A | 0 | 0      | G |
| 5 | G347f36S116            | 46363445 | 0 | 0 | 0      | G |
| 5 | BICF2P181027           | 46383361 | G | 0 | 0      | A |
| 5 | BICF2G630186879        | 46408387 | A | 0 | 0      | G |
| 5 | BICF2G630186892        | 46418781 | G | 0 | 0      | A |
| 5 | BICF2G630186927        | 46435777 | A | 0 | 0      | G |
| 5 | BICF2G630186933        | 46438890 | A | 0 | 0      | G |
| 5 | BICF2G630186953        | 46451107 | A | 0 | 0      | G |
| 5 | BICF2G630186964        | 46463491 | G | 0 | 0      | A |
| 5 | BICF2G630186985        | 46471727 | G | 0 | 0      | A |
| 5 | BICF2P217445           | 46489577 | 0 | 0 | 0      | A |

|   |                        |          |   |   |        |   |
|---|------------------------|----------|---|---|--------|---|
| 5 | BICF2G630186995        | 46498069 | G | 1 | 1      | A |
| 5 | BICF2G630187000        | 46511658 | A | 0 | 0      | G |
| 5 | BICF2S23423959         | 46524163 | T | 0 | 0      | A |
| 5 | BICF2G630187013        | 46538636 | C | 0 | 0      | A |
| 5 | BICF2P422578           | 46548474 | 0 | 0 | 0      | G |
| 5 | BICF2G630187016        | 46560470 | A | 1 | 1      | G |
| 5 | BICF2G630187018        | 46568994 | A | 0 | 0      | G |
| 5 | BICF2G630187020        | 46583644 | A | 0 | 0.2    | G |
| 5 | BICF2G630187022        | 46587057 | G | 0 | 0.2857 | A |
| 5 | TIGRP2P71448_rs8939649 | 46622155 | A | 0 | 0.2857 | G |
| 5 | BICF2P1394519          | 46643192 | A | 1 | 1      | G |
| 5 | BICF2P283701           | 46654276 | G | 0 | 0.2857 | A |
| 5 | BICF2P1259970          | 46674946 | A | 0 | 0.2857 | G |
| 5 | BICF2S2392653          | 46685227 | G | 1 | 0.7143 | A |
| 5 | BICF2P763805           | 46692681 | A | 1 | 0.8    | G |
| 5 | BICF2G630187050        | 46702497 | A | 1 | 0.7143 | G |
| 5 | BICF2G630187066        | 46716461 | A | 0 | 0      | G |
| 5 | BICF2P56117            | 46721860 | A | 0 | 0.2857 | G |
| 5 | BICF2G630187070        | 46729345 | A | 0 | 0      | C |
| 5 | BICF2G630187075        | 46736938 | A | 1 | 1      | G |
| 5 | BICF2G630187106        | 46774514 | A | 0 | 0.2857 | G |
| 5 | BICF2G630187117        | 46785340 | A | 0 | 0      | G |
| 5 | BICF2G630187121        | 46797455 | A | 0 | 0      | G |
| 5 | BICF2G630187129        | 46808035 | G | 0 | 0.2857 | A |
| 5 | BICF2G630187144        | 46817654 | C | 0 | 0.2857 | G |
| 5 | BICF2P97580            | 46830016 | 0 | 0 | 0      | C |
| 5 | BICF2G630187147        | 46844229 | 0 | 0 | 0      | G |
| 5 | BICF2P1513176          | 46866466 | G | 1 | 1      | A |
| 5 | BICF2G630187158        | 46884482 | A | 0 | 0      | C |
| 5 | BICF2G630187160        | 46886644 | G | 0 | 0      | A |
| 5 | BICF2G630187171        | 46899140 | A | 0 | 0      | G |
| 5 | BICF2S23111031         | 46913495 | C | 0 | 0      | G |
| 5 | TIGRP2P71490_rs8492309 | 46922985 | A | 0 | 0      | G |
| 5 | BICF2G630187198        | 46937085 | T | 0 | 0      | A |
| 5 | BICF2G630187206        | 46944163 | A | 1 | 1      | G |
| 5 | BICF2S23511087         | 46956371 | A | 0 | 0      | C |
| 5 | BICF2G630187227        | 46966504 | A | 0 | 0      | C |
| 5 | BICF2G630187264        | 46986065 | G | 0 | 0      | A |
| 5 | BICF2G630187267        | 46989781 | G | 0 | 0      | A |
| 5 | BICF2G630187268        | 46990030 | A | 0 | 0      | G |
| 5 | BICF2G630187337        | 47010908 | G | 1 | 1      | A |
| 5 | BICF2G630187355        | 47016766 | G | 0 | 0      | A |
| 5 | BICF2G630187387        | 47036440 | G | 1 | 1      | C |
| 5 | BICF2G630187403        | 47047616 | A | 0 | 0      | G |
| 5 | BICF2G630187408        | 47063355 | G | 0 | 0      | A |
| 5 | BICF2P1084320          | 47070258 | A | 0 | 0      | C |
| 5 | BICF2P1505313          | 47090810 | A | 0 | 0      | G |

|   |                        |          |   |   |        |   |
|---|------------------------|----------|---|---|--------|---|
| 5 | TIGRP2P71511_rs8502819 | 47095461 | C | 1 | 1      | A |
| 5 | BICF2P416741           | 47107111 | A | 0 | 0      | G |
| 5 | BICF2P272358           | 47116899 | G | 1 | 1      | A |
| 5 | BICF2P1089498          | 47128310 | G | 0 | 0      | A |
| 5 | BICF2P232416           | 47148086 | G | 0 | 0      | A |
| 5 | BICF2G630187455        | 47150997 | G | 0 | 0      | A |
| 5 | BICF2G630187468        | 47163453 | A | 0 | 0      | G |
| 5 | BICF2G630187469        | 47163546 | A | 0 | 0      | G |
| 5 | BICF2G630187475        | 47173022 | G | 0 | 0      | A |
| 5 | BICF2G630187491        | 47192258 | A | 1 | 0.7143 | G |
| 5 | BICF2G630187498        | 47195264 | A | 1 | 1      | T |
| 5 | BICF2G630187503        | 47214400 | G | 1 | 0.7143 | A |
| 5 | BICF2P1170772          | 47229455 | A | 0 | 0      | G |
| 5 | BICF2P419745           | 47232749 | T | 0 | 0      | A |
| 5 | BICF2P209903           | 47245908 | A | 0 | 0      | G |
| 5 | TIGRP2P71547_rs8844997 | 47256559 | A | 0 | 0      | G |
| 5 | TIGRP2P71548_rs8644695 | 47265430 | A | 0 | 0      | G |
| 5 | BICF2P365609           | 47277620 | G | 0 | 0      | A |
| 5 | BICF2S23234898         | 47294203 | G | 0 | 0      | A |
| 5 | BICF2P167514           | 47300476 | A | 0 | 0      | G |
| 5 | BICF2P250380           | 47317049 | G | 0 | 0      | A |
| 5 | BICF2G630187516        | 47324118 | G | 0 | 0.2857 | A |
| 5 | TIGRP2P71560_rs8937362 | 47335318 | A | 0 | 0      | G |
| 5 | BICF2P360563           | 47350942 | A | 0 | 0.2857 | G |
| 5 | BICF2P1229538          | 47358271 | G | 0 | 0      | A |
| 5 | TIGRP2P71570_rs9248163 | 47372989 | A | 0 | 0      | G |
| 5 | BICF2G630187527        | 47375859 | A | 0 | 0      | T |
| 5 | BICF2G630187536        | 47386531 | A | 0 | 0      | G |
| 5 | BICF2G630187548        | 47391598 | A | 0 | 0.2857 | G |
| 5 | BICF2P277933           | 47408778 | A | 0 | 0      | C |
| 5 | TIGRP2P71577_rs8794018 | 47414734 | A | 0 | 0      | C |
| 5 | BICF2G630187586        | 47430380 | G | 0 | 0.2857 | A |
| 5 | BICF2G630187596        | 47440047 | G | 0 | 0.2857 | A |
| 5 | BICF2P253425           | 47456234 | G | 0 | 0      | A |
| 5 | BICF2S23647701         | 47460682 | A | 0 | 0      | G |
| 5 | BICF2S23639621         | 47476953 | A | 0 | 0      | G |
| 5 | BICF2P446737           | 47493970 | A | 0 | 0      | G |
| 5 | TIGRP2P71608_rs8802111 | 47501573 | A | 0 | 0      | G |
| 5 | BICF2P294747           | 47514597 | A | 0 | 0.2857 | G |
| 5 | TIGRP2P71617_rs9250386 | 47525882 | G | 0 | 0      | A |
| 5 | BICF2P1122600          | 47532136 | G | 0 | 0      | A |
| 5 | BICF2P291809           | 47542477 | G | 0 | 0      | A |
| 5 | BICF2P115332           | 47558944 | G | 1 | 0.7143 | A |
| 5 | BICF2P661404           | 47566104 | G | 0 | 0.2857 | A |
| 5 | BICF2P980625           | 47577747 | A | 1 | 0.7143 | G |
| 5 | BICF2P525607           | 47587736 | 0 | 0 | 0      | G |
| 5 | BICF2G630187615        | 47606221 | G | 1 | 0.7143 | A |

|   |                        |          |   |   |        |   |
|---|------------------------|----------|---|---|--------|---|
| 5 | BICF2P625366           | 47617114 | G | 1 | 0.7143 | A |
| 5 | BICF2P1420185          | 47630122 | G | 1 | 0.7143 | A |
| 5 | BICF2G630187649        | 47644089 | T | 1 | 1      | A |
| 5 | BICF2G630187658        | 47652578 | A | 1 | 1      | G |
| 5 | BICF2P981519           | 47660892 | G | 0 | 0.2857 | A |
| 5 | BICF2G630187682        | 47668708 | C | 0 | 0.2857 | A |
| 5 | BICF2G630187696        | 47689361 | C | 0 | 0.2857 | A |
| 5 | BICF2G630187698        | 47690835 | A | 0 | 0      | G |
| 5 | BICF2G630187705        | 47707624 | A | 0 | 0      | G |
| 5 | BICF2G630187712        | 47714308 | G | 0 | 0      | A |
| 5 | BICF2P384664           | 47727062 | A | 0 | 0      | G |
| 5 | BICF2G630187716        | 47747458 | T | 0 | 0      | A |
| 5 | BICF2P777829           | 47752866 | A | 1 | 0.7143 | C |
| 5 | BICF2G630187722        | 47760526 | G | 0 | 0      | A |
| 5 | BICF2G630187725        | 47773220 | G | 0 | 0      | A |
| 5 | BICF2P860194           | 47784696 | A | 1 | 0.7143 | G |
| 5 | TIGRP2P71670_rs8870230 | 47794633 | A | 0 | 0      | G |
| 5 | BICF2G630187728        | 47816656 | T | 0 | 0      | A |
| 5 | BICF2S2327772          | 47828053 | A | 0 | 0.2857 | G |
| 5 | BICF2G630187732        | 47835346 | 0 | 0 | 0      | G |
| 5 | BICF2P1335186          | 47848554 | 0 | 0 | 0      | G |
| 5 | BICF2G630187745        | 47862493 | C | 0 | 0.2857 | A |
| 5 | BICF2G630187751        | 47863106 | G | 0 | 0.2857 | A |
| 5 | BICF2G630187781        | 47876311 | A | 0 | 0.2857 | G |
| 5 | BICF2G630187783        | 47886685 | A | 0 | 0      | C |
| 5 | BICF2P583791           | 47906309 | 0 | 0 | 0      | A |
| 5 | BICF2S23041992         | 47931399 | G | 0 | 0      | C |
| 5 | BICF2G630187785        | 47940263 | A | 0 | 0      | G |
| 5 | BICF2S24415085         | 47961072 | 0 | 0 | 0      | G |
| 5 | TIGRP2P71676_rs8990315 | 47975174 | 0 | 0 | 0      | A |
| 5 | BICF2S23024764         | 47980801 | A | 0 | 0      | G |
| 5 | BICF2G630187793        | 47996518 | A | 0 | 0      | G |
| 5 | TIGRP2P71680_rs9038471 | 48011761 | C | 0 | 0      | A |
| 5 | BICF2G630187798        | 48018522 | A | 0 | 0      | G |
| 5 | BICF2G630187804        | 48041671 | G | 0 | 0      | A |
| 5 | BICF2G630187811        | 48056873 | A | 0 | 0.2857 | G |
| 5 | BICF2G630187815        | 48090358 | 0 | 0 | 0      | G |
| 5 | BICF2P408006           | 48114518 | A | 0 | 0      | G |
| 5 | BICF2S23147082         | 48120450 | G | 0 | 0      | A |
| 5 | BICF2P1026929          | 48130205 | A | 1 | 1      | G |
| 5 | BICF2G630187837        | 48141422 | G | 1 | 1      | A |
| 5 | BICF2P964054           | 48151351 | C | 0 | 0.2857 | A |
| 5 | BICF2G630187854        | 48172024 | A | 1 | 1      | G |
| 5 | BICF2S23757204         | 48176254 | G | 0 | 0      | A |
| 5 | BICF2G630187856        | 48200745 | A | 1 | 0.7143 | G |
| 5 | BICF2P212694           | 48209905 | G | 0 | 0.2857 | A |
| 5 | BICF2P680631           | 48225037 | C | 0 | 0.2857 | A |



|   |                        |          |   |   |        |   |
|---|------------------------|----------|---|---|--------|---|
| 5 | BICF2P819073           | 48234900 | A | 0 | 0.2857 | G |
| 5 | BICF2P334730           | 48250241 | G | 0 | 0.2857 | A |
| 5 | BICF2P504716           | 48254824 | A | 0 | 0.25   | G |
| 5 | BICF2P1274127          | 48271371 | G | 0 | 0.2857 | A |
| 5 | TIGRP2P71719_rs9104422 | 48277332 | A | 0 | 0.2857 | G |
| 5 | TIGRP2P71729_rs9248555 | 48290301 | 0 | 0 | 0      | G |
| 5 | BICF2P1114921          | 48301502 | G | 0 | 0.2857 | A |
| 5 | BICF2P305241           | 48322141 | 0 | 0 | 0      | G |
| 5 | BICF2P953030           | 48326945 | 0 | 0 | 0      | A |
| 5 | TIGRP2P71774_rs9240394 | 48341772 | 0 | 0 | 0      | G |
| 5 | BICF2P384624           | 48349170 | G | 0 | 0.2857 | C |
| 5 | TIGRP2P71781_rs8738964 | 48360935 | 0 | 0 | 0      | C |
| 5 | BICF2P781415           | 48370597 | 0 | 0 | 0      | G |
| 5 | BICF2P781411           | 48373003 | A | 0 | 0      | G |
| 5 | BICF2P1271569          | 48378004 | 0 | 0 | 0      | A |
| 5 | BICF2P414650           | 48384857 | C | 0 | 0.2857 | A |
| 5 | TIGRP2P71793_rs8764066 | 48391366 | 0 | 0 | 0      | G |
| 5 | TIGRP2P71795_rs8819957 | 48395722 | 0 | 0 | 0      | A |
| 5 | BICF2P401308           | 48406766 | C | 1 | 1      | G |
| 5 | BICF2G630187864        | 48446057 | A | 1 | 0.7143 | G |
| 5 | BICF2G630187869        | 48453502 | G | 1 | 1      | A |
| 5 | BICF2G630187888        | 48468139 | C | 1 | 1      | G |
| 5 | TIGRP2P71809_rs8491038 | 48474779 | G | 0 | 0      | A |
| 5 | BICF2P279275           | 48485845 | A | 0 | 0.2857 | C |
| 5 | BICF2G630187901        | 48497433 | A | 1 | 1      | G |
| 5 | BICF2G630187908        | 48522899 | A | 1 | 0.7143 | C |
| 5 | BICF2P468245           | 48534047 | A | 1 | 0.7143 | G |
| 5 | BICF2S23529098         | 48551980 | A | 0 | 0.2857 | G |
| 5 | TIGRP2P71828_rs8550473 | 48559893 | A | 0 | 0      | G |
| 5 | BICF2P1388567          | 48560525 | A | 1 | 0.7143 | G |
| 5 | BICF2G630187927        | 48564869 | G | 1 | 1      | A |
| 5 | BICF2G630187953        | 48581523 | A | 1 | 1      | G |
| 5 | BICF2P1200980          | 48588720 | A | 0 | 0.2857 | G |
| 5 | BICF2G630187970        | 48608611 | G | 1 | 1      | A |
| 5 | BICF2G630187975        | 48612050 | A | 1 | 0.7143 | G |
| 5 | TIGRP2P71831_rs8638282 | 48630303 | 0 | 0 | 0      | A |
| 5 | BICF2G630187995        | 48637045 | G | 0 | 0      | A |
| 5 | BICF2G630188001        | 48650051 | A | 0 | 0      | T |
| 5 | BICF2P1423293          | 48660270 | A | 0 | 0      | G |
| 5 | BICF2G630188042        | 48685964 | A | 1 | 0.7143 | G |
| 5 | BICF2G630188045        | 48692940 | G | 0 | 0      | A |
| 5 | BICF2G630188059        | 48708572 | A | 1 | 0.7143 | G |
| 5 | BICF2G630188062        | 48714572 | G | 1 | 0.7143 | A |
| 5 | BICF2G630188075        | 48729406 | C | 1 | 1      | A |
| 5 | BICF2G630188080        | 48746336 | G | 1 | 0.7143 | A |
| 5 | BICF2P251265           | 48756520 | 0 | 0 | 0      | A |
| 5 | BICF2S23620647         | 48768926 | G | 1 | 1      | A |

|   |                        |          |   |   |        |   |
|---|------------------------|----------|---|---|--------|---|
| 5 | BICF2P1010252          | 48773672 | A | 1 | 1      | G |
| 5 | TIGRP2P71853_rs8814509 | 48801915 | C | 1 | 1      | A |
| 5 | TIGRP2P71861_rs8965568 | 48816073 | G | 1 | 1      | A |
| 5 | BICF2P1428306          | 48839040 | A | 1 | 1      | G |
| 5 | BICF2P338180           | 48848198 | A | 0 | 0      | T |
| 5 | BICF2P219609           | 48852997 | A | 0 | 0.2857 | G |
| 5 | BICF2P895161           | 48867973 | G | 1 | 0.7143 | A |
| 5 | BICF2P1257343          | 48876988 | C | 0 | 0      | A |
| 5 | BICF2G630188091        | 48886520 | A | 1 | 0.7143 | G |
| 5 | BICF2P866878           | 48907460 | C | 1 | 0.7143 | G |
| 5 | BICF2G630188123        | 48920589 | A | 1 | 0.7143 | G |
| 5 | BICF2G630188125        | 48921462 | G | 1 | 0.7143 | A |
| 5 | BICF2G630188146        | 48932946 | G | 0 | 0.2857 | A |
| 5 | BICF2G630188149        | 48944640 | G | 1 | 0.7143 | A |
| 5 | BICF2P742832           | 48960515 | A | 0 | 0      | C |
| 5 | BICF2S23430932         | 48971669 | 0 | 0 | 0      | A |
| 5 | BICF2G630188179        | 48988920 | A | 0 | 0.2857 | G |
| 5 | BICF2S23730100         | 48999644 | G | 0 | 0      | A |
| 5 | BICF2G630188212        | 49010342 | G | 1 | 0.7143 | A |
| 5 | BICF2G630188226        | 49020553 | A | 1 | 0.7143 | G |
| 5 | BICF2G630188240        | 49031379 | A | 1 | 0.7143 | G |
| 5 | BICF2G630188253        | 49040635 | A | 0 | 0.2857 | G |
| 5 | BICF2P1421257          | 49052338 | A | 1 | 0.7143 | G |
| 5 | BICF2G630188255        | 49052513 | A | 0 | 0.2857 | G |
| 5 | BICF2P756122           | 49065505 | C | 0 | 0      | A |
| 5 | BICF2S23737438         | 49072560 | G | 0 | 0      | A |
| 5 | BICF2G630188283        | 49082442 | A | 0 | 0      | G |
| 5 | BICF2G630188290        | 49100246 | C | 0 | 0      | A |
| 5 | BICF2G630188293        | 49107657 | A | 1 | 0.7143 | G |
| 5 | BICF2G630188303        | 49116502 | A | 0 | 0      | G |
| 5 | BICF2S24116869         | 49131711 | 0 | 0 | 0      | G |
| 5 | BICF2P781275           | 49148018 | T | 0 | 0      | A |
| 5 | BICF2P100580           | 49154058 | 0 | 0 | 0      | A |
| 5 | BICF2G630188323        | 49164091 | G | 0 | 0      | A |
| 5 | BICF2G630188339        | 49174135 | A | 0 | 0      | G |
| 5 | BICF2P1371496          | 49186658 | 0 | 0 | 0      | A |
| 5 | BICF2G630188374        | 49207892 | G | 0 | 0      | A |
| 5 | BICF2P1166770          | 49217076 | A | 0 | 0      | G |
| 5 | BICF2P1166771          | 49217444 | A | 0 | 0      | G |
| 5 | BICF2G630188388        | 49230621 | G | 0 | 0      | A |
| 5 | BICF2G630188396        | 49233686 | 0 | 0 | 0      | G |
| 5 | BICF2G630188406        | 49245046 | A | 0 | 0      | C |
| 5 | BICF2G630188417        | 49261179 | G | 0 | 0      | A |
| 5 | BICF2G630188426        | 49272644 | A | 0 | 0      | G |
| 5 | BICF2G630188436        | 49279936 | G | 0 | 0      | A |
| 5 | BICF2G630188459        | 49290037 | G | 0 | 0      | A |
| 5 | TIGRP2P71922_rs9026470 | 49302350 | C | 1 | 1      | A |

|   |                        |          |   |   |        |   |
|---|------------------------|----------|---|---|--------|---|
| 5 | BICF2G630188464        | 49321757 | G | 1 | 1      | A |
| 5 | BICF2G630188471        | 49330334 | A | 1 | 1      | G |
| 5 | BICF2P1000909          | 49333944 | A | 0 | 0      | G |
| 5 | BICF2G630188484        | 49340493 | A | 1 | 1      | G |
| 5 | BICF2G630188485        | 49340633 | A | 1 | 1      | C |
| 5 | BICF2G630188491        | 49354815 | A | 0 | 0      | G |
| 5 | BICF2P1278036          | 49363038 | G | 1 | 1      | A |
| 5 | BICF2G630188518        | 49375178 | A | 0 | 0      | G |
| 5 | BICF2G630188530        | 49383378 | G | 1 | 1      | A |
| 5 | BICF2G630188536        | 49397019 | C | 1 | 1      | A |
| 5 | BICF2G630188548        | 49411581 | G | 0 | 0      | A |
| 5 | BICF2G630188553        | 49416795 | A | 1 | 1      | G |
| 5 | BICF2G630188571        | 49444519 | A | 1 | 1      | G |
| 5 | BICF2G630188573        | 49453351 | A | 1 | 1      | G |
| 5 | BICF2S23222404         | 49478884 | A | 0 | 0      | G |
| 5 | BICF2S23343169         | 49487828 | A | 0 | 0      | G |
| 5 | BICF2P783410           | 49505972 | 0 | 0 | 0      | C |
| 5 | BICF2P855616           | 49513375 | A | 0 | 0      | G |
| 5 | BICF2P773187           | 49534633 | A | 0 | 0      | G |
| 5 | BICF2P1106606          | 49550344 | G | 0 | 0      | A |
| 5 | BICF2G630188596        | 49554234 | A | 0 | 0.2857 | G |
| 5 | BICF2G630188599        | 49566681 | A | 0 | 0.2857 | G |
| 5 | BICF2P1384417          | 49582319 | G | 0 | 0      | A |
| 5 | BICF2P557905           | 49594917 | A | 0 | 0      | G |
| 5 | BICF2P1211502          | 49601493 | G | 0 | 0      | A |
| 5 | BICF2P11137            | 49613791 | G | 0 | 0      | A |
| 5 | BICF2P82260            | 49622997 | A | 0 | 0      | G |
| 5 | BICF2P998662           | 49636116 | C | 0 | 0      | A |
| 5 | BICF2G630188609        | 49648706 | C | 0 | 0      | A |
| 5 | BICF2S23048165         | 49677964 | T | 0 | 0.2857 | A |
| 5 | BICF2G630188617        | 49689955 | T | 0 | 0.2857 | A |
| 5 | BICF2P832162           | 49692954 | 0 | 0 | 0      | T |
| 5 | BICF2P92384            | 49715707 | 0 | 0 | 0      | A |
| 5 | BICF2G630188619        | 49745678 | A | 0 | 0.2857 | G |
| 5 | BICF2S23018325         | 49752743 | A | 0 | 0.2857 | G |
| 5 | BICF2P745610           | 49760643 | 0 | 0 | 0      | A |
| 5 | BICF2G630188624        | 49790683 | A | 0 | 0.2857 | G |
| 5 | BICF2G630188633        | 49802619 | C | 1 | 0.7143 | A |
| 5 | BICF2G630188644        | 49815138 | A | 1 | 0.75   | G |
| 5 | TIGRP2P72040_rs8637209 | 49820049 | G | 1 | 1      | A |
| 5 | BICF2P281149           | 49832980 | A | 0 | 0      | G |
| 5 | BICF2G630188658        | 49845668 | A | 0 | 0      | G |
| 5 | BICF2G630188673        | 49854800 | G | 0 | 0      | A |
| 5 | BICF2G630188697        | 49866374 | G | 0 | 0      | A |
| 5 | BICF2G630188723        | 49889914 | G | 0 | 0      | C |
| 5 | BICF2G630188727        | 49893072 | G | 0 | 0      | A |
| 5 | BICF2G630188736        | 49900354 | G | 0 | 0      | C |

|   |                        |          |   |   |        |   |
|---|------------------------|----------|---|---|--------|---|
| 5 | BICF2G630188740        | 49900564 | C | 0 | 0      | A |
| 5 | BICF2S23043187         | 49919398 | A | 0 | 0      | G |
| 5 | BICF2G630188746        | 49933380 | A | 0 | 0      | G |
| 5 | BICF2G630188754        | 49945892 | A | 0 | 0      | G |
| 5 | BICF2G630188772        | 49965822 | A | 0 | 0      | G |
| 5 | BICF2G630188786        | 49971811 | G | 0 | 0      | A |
| 5 | BICF2G630188798        | 49988587 | A | 0 | 0      | G |
| 5 | BICF2G630188802        | 49992765 | G | 0 | 0      | A |
| 5 | BICF2G630188814        | 50005191 | C | 0 | 0      | A |
| 5 | BICF2S2357962          | 50024311 | 0 | 0 | 0      | G |
| 5 | BICF2G630188822        | 50028802 | A | 0 | 0      | G |
| 5 | BICF2G630188824        | 50038163 | C | 1 | 0.7143 | G |
| 5 | BICF2G630188842        | 50056426 | A | 1 | 0.5    | C |
| 5 | BICF2G630188847        | 50060252 | A | 1 | 0.7143 | G |
| 5 | BICF2G630188851        | 50088599 | C | 0 | 0      | A |
| 5 | BICF2G630188869        | 50102227 | A | 0 | 0.2857 | G |
| 5 | BICF2G630188877        | 50107004 | A | 0 | 0.2857 | G |
| 5 | BICF2G630188891        | 50117729 | A | 0 | 0      | C |
| 5 | BICF2G630188914        | 50130244 | A | 1 | 1      | G |
| 5 | BICF2P838494           | 50141027 | C | 0 | 0      | A |
| 5 | TIGRP2P72055_rs8623838 | 50154961 | 0 | 0 | 0      | A |
| 5 | BICF2P889552           | 50168752 | G | 0 | 0      | A |
| 5 | BICF2G630188941        | 50177607 | G | 0 | 0      | A |
| 5 | BICF2G630188963        | 50187749 | G | 0 | 0      | A |
| 5 | BICF2G630188977        | 50199759 | A | 0 | 0      | C |
| 5 | BICF2P1188662          | 50212403 | G | 0 | 0      | A |
| 5 | BICF2P816447           | 50221989 | G | 0 | 0      | A |
| 5 | BICF2G630188999        | 50240244 | A | 0 | 0      | G |
| 5 | BICF2G630189008        | 50245423 | A | 0 | 0      | G |
| 5 | BICF2G630189010        | 50255576 | G | 0 | 0      | A |
| 5 | BICF2G630189029        | 50276072 | A | 0 | 0      | G |
| 5 | BICF2G630189031        | 50278715 | C | 0 | 0      | A |
| 5 | BICF2G630189038        | 50291416 | A | 0 | 0      | G |
| 5 | BICF2G630189050        | 50301115 | G | 0 | 0      | A |
| 5 | BICF2G630189061        | 50312836 | A | 0 | 0      | C |
| 5 | BICF2G630189074        | 50326798 | A | 0 | 0      | C |
| 5 | BICF2P445723           | 50348752 | G | 0 | 0      | A |
| 5 | BICF2G630189118        | 50361806 | G | 0 | 0      | A |
| 5 | BICF2G630189132        | 50371541 | A | 0 | 0      | G |
| 5 | BICF2G630189148        | 50381560 | A | 0 | 0      | G |
| 5 | BICF2G630189165        | 50395816 | A | 0 | 0      | G |
| 5 | BICF2G630189198        | 50410207 | A | 0 | 0      | C |
| 5 | BICF2G630189206        | 50417530 | A | 0 | 0.125  | C |
| 5 | TIGRP2P72101_rs9005933 | 50433232 | A | 0 | 0      | G |
| 5 | BICF2P157110           | 50445498 | A | 0 | 0      | G |
| 5 | BICF2S2454671          | 50456371 | 0 | 0 | 0      | G |
| 5 | TIGRP2P72103_rs8801543 | 50469550 | G | 0 | 0      | A |

|   |                        |          |   |   |        |   |
|---|------------------------|----------|---|---|--------|---|
| 5 | TIGRP2P72106_rs8517100 | 50476903 | A | 0 | 0      | G |
| 5 | BICF2G630189226        | 50505734 | G | 0 | 0      | A |
| 5 | BICF2P942719           | 50529646 | G | 0 | 0      | A |
| 5 | TIGRP2P72123_rs8878024 | 50550799 | 0 | 0 | 0      | G |
| 5 | BICF2P118660           | 50558480 | 0 | 0 | 0      | G |
| 5 | TIGRP2P72131_rs8705801 | 50565697 | 0 | 0 | 0      | G |
| 5 | BICF2P1131825          | 50581624 | 0 | 0 | 0      | A |
| 5 | BICF2P192244           | 50589844 | 0 | 0 | 0      | G |
| 5 | BICF2P183793           | 50608958 | 0 | 0 | 0      | A |
| 5 | BICF2G630189232        | 50626425 | C | 0 | 0      | G |
| 5 | BICF2G630189235        | 50637458 | A | 0 | 0      | G |
| 5 | BICF2G630189239        | 50657066 | A | 0 | 0      | G |
| 5 | TIGRP2P72153_rs9163020 | 50668999 | A | 0 | 0      | C |
| 5 | TIGRP2P72160_rs8508364 | 50697635 | 0 | 0 | 0      | C |
| 5 | TIGRP2P72161_rs8575688 | 50707207 | 0 | 0 | 0      | A |
| 5 | BICF2P1184636          | 50724747 | A | 1 | 0.7143 | G |
| 5 | BICF2P385445           | 50726965 | 0 | 0 | 0      | G |
| 5 | BICF2P556382           | 50748165 | A | 0 | 0      | G |
| 5 | BICF2P578956           | 50764794 | 0 | 0 | 0      | A |
| 5 | BICF2G630189251        | 50789784 | A | 0 | 0.2857 | G |
| 5 | BICF2P613646           | 50796333 | 0 | 0 | 0      | A |
| 5 | BICF2G630189275        | 50808029 | G | 0 | 0.2857 | A |
| 5 | BICF2G630189299        | 50820355 | G | 0 | 0.2857 | A |
| 5 | BICF2S243883           | 50828648 | A | 0 | 0      | G |
| 5 | BICF2G630189318        | 50838115 | A | 0 | 0.2857 | G |
| 5 | BICF2G630189330        | 50841807 | A | 0 | 0.2857 | G |
| 5 | TIGRP2P72223_rs8630596 | 50854369 | G | 0 | 0      | A |
| 5 | TIGRP2P72227_rs9188337 | 50864883 | A | 0 | 0.2857 | G |
| 5 | BICF2P1144347          | 50878379 | G | 0 | 0.2857 | A |
| 5 | BICF2G630189424        | 50901328 | A | 1 | 1      | C |
| 5 | BICF2P786597           | 50914929 | A | 1 | 1      | G |
| 5 | BICF2P349668           | 50924216 | G | 0 | 0      | A |
| 5 | BICF2P1075763          | 50933064 | A | 1 | 0.7143 | C |
| 5 | BICF2G630189427        | 50933790 | A | 0 | 0      | C |
| 5 | BICF2P164477           | 50937430 | A | 1 | 0.7143 | G |
| 5 | BICF2G630189430        | 50954208 | C | 0 | 0      | A |
| 5 | BICF2P284528           | 50957856 | A | 0 | 0      | G |
| 5 | BICF2G630189475        | 50984412 | 0 | 0 | 0      | A |
| 5 | BICF2P961681           | 50993251 | A | 0 | 0      | G |
| 5 | BICF2G630189479        | 51002870 | A | 0 | 0.25   | G |
| 5 | BICF2P108137           | 51015178 | A | 0 | 0      | G |
| 5 | BICF2S23454421         | 51025573 | A | 1 | 1      | C |
| 5 | BICF2P1445767          | 51048754 | G | 0 | 0.2857 | A |
| 5 | TIGRP2P72295_rs8907455 | 51071313 | G | 1 | 0.7143 | A |
| 5 | TIGRP2P72296_rs8907459 | 51071979 | 0 | 0 | 0      | A |
| 5 | BICF2P720600           | 51087104 | A | 0 | 0.2857 | C |
| 5 | BICF2S23145177         | 51097644 | A | 1 | 1      | G |

|   |                        |          |   |   |        |   |
|---|------------------------|----------|---|---|--------|---|
| 5 | BICF2S23713244         | 51111200 | A | 0 | 0.2857 | G |
| 5 | BICF2P595750           | 51121559 | A | 0 | 0      | G |
| 5 | BICF2P1326496          | 51131646 | G | 1 | 0.7143 | A |
| 5 | BICF2P576113           | 51145440 | A | 1 | 0.7143 | G |
| 5 | BICF2P460246           | 51180911 | G | 0 | 0.2857 | A |
| 5 | BICF2P550455           | 51190172 | 0 | 0 | 0      | A |
| 5 | TIGRP2P72329_rs8945238 | 51204151 | C | 0 | 0      | A |
| 5 | BICF2S23335908         | 51215427 | G | 1 | 0.7143 | A |
| 5 | BICF2P153341           | 51223109 | G | 0 | 0      | A |
| 5 | BICF2P201184           | 51251794 | 0 | 0 | 0      | A |
| 5 | BICF2G630189499        | 51265565 | A | 0 | 0.2857 | G |
| 5 | BICF2G630189510        | 51282743 | G | 0 | 0.2857 | A |
| 5 | BICF2P815511           | 51302744 | C | 0 | 0      | G |
| 5 | BICF2G630189519        | 51322690 | A | 0 | 0.2857 | G |
| 5 | BICF2G630189537        | 51332238 | G | 1 | 1      | A |
| 5 | BICF2P954643           | 51345136 | A | 0 | 0      | G |
| 5 | BICF2P1058252          | 51350026 | G | 1 | 1      | A |
| 5 | BICF2S23524716         | 51372910 | 0 | 0 | 0      | A |
| 5 | BICF2P824860           | 51390174 | G | 1 | 1      | A |
| 5 | TIGRP2P72354_rs8664203 | 51404087 | A | 0 | 0      | G |
| 5 | BICF2P741610           | 51412556 | 0 | 0 | 0      | A |
| 5 | TIGRP2P72356_rs9030426 | 51431428 | A | 1 | 0.7143 | G |
| 5 | BICF2G630189564        | 51431551 | A | 1 | 0.7143 | G |
| 5 | BICF2G630189574        | 51448708 | G | 0 | 0.2857 | A |
| 5 | BICF2S23143370         | 51456540 | C | 0 | 0      | A |
| 5 | BICF2G630189592        | 51469589 | C | 0 | 0.2857 | A |
| 5 | BICF2S22952978         | 51483806 | A | 0 | 0      | T |
| 5 | BICF2G630189614        | 51488759 | A | 0 | 0      | G |
| 5 | BICF2G630189626        | 51501381 | A | 0 | 0      | G |
| 5 | BICF2S23519156         | 51509482 | A | 0 | 0.2857 | G |
| 5 | BICF2G630189633        | 51520443 | A | 0 | 0      | C |
| 5 | BICF2G630189646        | 51534992 | A | 1 | 0.7143 | G |
| 5 | BICF2G630189652        | 51545452 | G | 0 | 0      | A |
| 5 | TIGRP2P72370_rs9072559 | 51559989 | G | 1 | 0.7143 | A |
| 5 | BICF2G630189667        | 51579558 | A | 1 | 0.7143 | G |
| 5 | BICF2P1090252          | 51589627 | A | 0 | 0      | G |
| 5 | BICF2G630189681        | 51600250 | A | 0 | 0      | G |
| 5 | BICF2G630189684        | 51604093 | G | 0 | 0      | A |
| 5 | BICF2G630189693        | 51614598 | A | 0 | 0      | G |
| 5 | BICF2P566885           | 51624631 | 0 | 0 | 0      | C |
| 5 | BICF2S23760191         | 51639046 | A | 0 | 0      | C |
| 5 | BICF2P316670           | 51656972 | A | 0 | 0      | T |
| 5 | BICF2G630189713        | 51670566 | G | 1 | 0.7143 | A |
| 5 | BICF2P418608           | 51683930 | A | 1 | 0.7143 | G |
| 5 | BICF2G630189719        | 51697464 | G | 1 | 0.7143 | A |
| 5 | BICF2G630189722        | 51711321 | G | 0 | 0      | A |
| 5 | BICF2P1172297          | 51721755 | 0 | 0 | 0      | G |

|   |                        |          |   |   |        |   |
|---|------------------------|----------|---|---|--------|---|
| 5 | BICF2G630189726        | 51730260 | A | 0 | 0      | C |
| 5 | BICF2S22916666         | 51740959 | G | 0 | 0      | A |
| 5 | BICF2G630189735        | 51753750 | A | 0 | 0      | G |
| 5 | BICF2G630189743        | 51775244 | A | 0 | 0.2857 | G |
| 5 | BICF2G630189750        | 51794389 | C | 0 | 0.2857 | A |
| 5 | BICF2P1006725          | 51798403 | C | 1 | 1      | A |
| 5 | TIGRP2P72397_rs9006225 | 51807701 | T | 0 | 0.2857 | A |
| 5 | BICF2G630189755        | 51823234 | A | 0 | 0      | G |
| 5 | BICF2P940216           | 51831739 | O | 0 | 0      | C |
| 5 | BICF2S23528959         | 51842046 | A | 0 | 0      | G |
| 5 | BICF2P462792           | 51863289 | A | 1 | 1      | C |
| 5 | BICF2G630189758        | 51867621 | A | 0 | 0      | G |
| 5 | BICF2P473972           | 51872358 | A | 1 | 0.7143 | G |
| 5 | BICF2G630189764        | 51872563 | A | 0 | 0      | G |
| 5 | BICF2G630189772        | 51876778 | A | 0 | 0      | G |
| 5 | BICF2S23448999         | 51891481 | G | 0 | 0.2857 | A |
| 5 | BICF2G630189786        | 51906170 | T | 0 | 0      | A |
| 5 | BICF2G630189790        | 51910699 | O | 0 | 0      | G |
| 5 | BICF2G630189796        | 51915396 | A | 1 | 1      | C |
| 5 | BICF2G630189830        | 51927276 | C | 1 | 1      | A |
| 5 | BICF2G630189842        | 51942302 | A | 1 | 0.6667 | C |
| 5 | BICF2P829379           | 51946093 | O | 0 | 0      | G |
| 5 | BICF2G630189849        | 51964614 | G | 0 | 0.2857 | A |
| 5 | BICF2P1046481          | 51970683 | O | 0 | 0      | A |
| 5 | BICF2P1317579          | 51984575 | A | 1 | 0.7143 | G |
| 5 | TIGRP2P72441_rs8565316 | 52000305 | A | 1 | 0.7143 | C |
| 5 | TIGRP2P72443_rs8677242 | 52010416 | G | 1 | 0.7143 | A |
| 5 | TIGRP2P72445_rs8975196 | 52016911 | G | 1 | 0.7143 | A |
| 5 | BICF2P1243477          | 52037374 | A | 0 | 0      | G |
| 5 | TIGRP2P72455_rs9232689 | 52052890 | A | 1 | 0.7143 | G |
| 5 | TIGRP2P72460_rs8843321 | 52061770 | G | 1 | 0.7143 | A |
| 5 | BICF2P653870           | 52075285 | A | 0 | 0      | G |
| 5 | BICF2P299041           | 52100119 | A | 0 | 0      | G |
| 5 | BICF2P644448           | 52125269 | G | 1 | 0.7143 | A |
| 5 | TIGRP2P72483_rs9127121 | 52131873 | G | 0 | 0      | A |
| 5 | BICF2S23529704         | 52149907 | A | 0 | 0      | T |
| 5 | BICF2P977545           | 52153448 | A | 1 | 0.7143 | G |
| 5 | BICF2P708036           | 52162303 | O | 0 | 0      | G |
| 5 | BICF2P492365           | 52166071 | G | 0 | 0.2857 | A |
| 5 | TIGRP2P72504_rs8748895 | 52178571 | A | 0 | 0      | G |
| 5 | BICF2P460367           | 52199832 | A | 0 | 0      | G |
| 5 | BICF2P569352           | 52217778 | C | 0 | 0.2857 | A |
| 5 | BICF2P490173           | 52244410 | G | 0 | 0.2857 | C |
| 5 | TIGRP2P72534_rs9087606 | 52252801 | G | 0 | 0.2857 | A |
| 5 | TIGRP2P72538_rs9159219 | 52265490 | O | 0 | 0      | A |
| 5 | BICF2P284159           | 52273256 | A | 0 | 0      | G |
| 5 | BICF2S22930616         | 52280903 | G | 1 | 0.7143 | A |

|   |                        |          |   |   |        |   |
|---|------------------------|----------|---|---|--------|---|
| 5 | TIGRP2P72550_rs8695048 | 52298200 | G | 0 | 0.2857 | A |
| 5 | TIGRP2P72551_rs8964711 | 52306490 | 0 | 0 | 0      | A |
| 5 | BICF2P1310782          | 52315333 | G | 1 | 0.7143 | A |
| 5 | BICF2P1328896          | 52329937 | A | 1 | 0.7143 | G |
| 5 | BICF2P102338           | 52340239 | A | 0 | 0      | G |
| 5 | BICF2P80151            | 52349210 | A | 1 | 0.7143 | G |
| 5 | BICF2S23244873         | 52393976 | G | 0 | 0      | A |
| 5 | TIGRP2P72568_rs8626712 | 52397194 | 0 | 0 | 0      | G |
| 5 | BICF2P556386           | 52406254 | G | 0 | 0      | A |
| 5 | BICF2P1404981          | 52421872 | A | 1 | 0.7143 | G |
| 5 | TIGRP2P72583_rs8845970 | 52430947 | G | 0 | 0      | C |
| 5 | BICF2S2336757          | 52450603 | G | 0 | 0      | A |
| 5 | BICF2P298129           | 52476846 | G | 1 | 1      | A |
| 5 | TIGRP2P72607_rs8633043 | 52486063 | A | 1 | 1      | T |
| 5 | BICF2P1300177          | 52505153 | 0 | 0 | 0      | A |
| 5 | BICF2P1155240          | 52509415 | G | 0 | 0      | A |
| 5 | TIGRP2P72628_rs8950654 | 52526260 | A | 0 | 0      | G |
| 5 | BICF2P499875           | 52537203 | A | 0 | 0      | G |
| 5 | BICF2P1190821          | 52544589 | G | 0 | 0      | A |
| 5 | BICF2P1080350          | 52561183 | G | 1 | 1      | A |
| 5 | BICF2P213671           | 52570364 | A | 0 | 0      | C |
| 5 | TIGRP2P72674_rs8962319 | 52594588 | 0 | 0 | 0      | C |
| 5 | BICF2P913925           | 52622811 | A | 0 | 0      | G |
| 5 | BICF2P78353            | 52632803 | G | 1 | 1      | A |
| 5 | TIGRP2P72680_rs8518845 | 52641903 | G | 1 | 1      | A |
| 5 | BICF2P184221           | 52650426 | A | 0 | 0      | G |
| 5 | BICF2P906049           | 52659717 | A | 0 | 0      | G |
| 5 | BICF2P555354           | 52671293 | A | 1 | 1      | G |
| 5 | BICF2P985597           | 52683997 | G | 1 | 1      | A |
| 5 | BICF2S23621078         | 52708058 | A | 0 | 0      | C |
| 5 | TIGRP2P72726_rs8609913 | 52721205 | A | 0 | 0      | G |
| 5 | BICF2P1020322          | 52735449 | G | 0 | 0      | A |
| 5 | TIGRP2P72735_rs8731289 | 52742721 | A | 0 | 0      | G |
| 5 | TIGRP2P72744_rs8562131 | 52759318 | A | 1 | 1      | G |
| 5 | BICF2P1389814          | 52765704 | A | 1 | 1      | G |
| 5 | BICF2P283578           | 52790917 | A | 0 | 0      | G |
| 5 | TIGRP2P72774_rs9157257 | 52803967 | G | 0 | 0      | A |
| 5 | BICF2S2346153          | 52828335 | A | 1 | 1      | C |
| 5 | BICF2P77375            | 52831723 | A | 0 | 0      | G |
| 5 | BICF2P20310            | 52853287 | A | 0 | 0      | C |
| 5 | BICF2P1471371          | 52855285 | G | 0 | 0      | C |
| 5 | BICF2P604453           | 52872378 | A | 1 | 1      | G |
| 5 | BICF2S23442504         | 52883592 | C | 1 | 1      | A |
| 5 | BICF2P330737           | 52897341 | G | 0 | 0      | A |
| 5 | TIGRP2P72807_rs8724021 | 52903077 | G | 1 | 1      | A |
| 5 | BICF2S2323131          | 52918202 | A | 0 | 0      | G |
| 5 | TIGRP2P72825_rs8502385 | 52921744 | A | 0 | 0      | G |



|   |                        |          |   |   |   |   |
|---|------------------------|----------|---|---|---|---|
| 5 | BICF2P874007           | 52956607 | 0 | 0 | 0 | A |
| 5 | BICF2S2293218          | 52971705 | G | 0 | 0 | A |
| 5 | BICF2S2343736          | 53002084 | G | 0 | 0 | A |
| 5 | BICF2P1264564          | 53010789 | A | 0 | 0 | G |
| 5 | BICF2P1396557          | 53055058 | 0 | 0 | 0 | A |
| 5 | BICF2P1253543          | 53067727 | G | 0 | 0 | A |
| 5 | BICF2P1214298          | 53081185 | G | 0 | 0 | A |
| 5 | BICF2P1282816          | 53099511 | A | 1 | 1 | G |
| 5 | BICF2S2341189          | 53108246 | A | 0 | 0 | G |
| 5 | BICF2S23131957         | 53134151 | A | 0 | 0 | C |
| 5 | BICF2P476978           | 53150914 | G | 0 | 0 | A |
| 5 | BICF2P337146           | 53154486 | A | 0 | 0 | C |
| 5 | BICF2P958437           | 53165188 | G | 0 | 0 | A |
| 5 | BICF2P813727           | 53187409 | C | 0 | 0 | A |
| 5 | BICF2P114893           | 53198823 | 0 | 0 | 0 | A |
| 5 | BICF2S2322246          | 53204915 | 0 | 0 | 0 | A |
| 5 | BICF2P1285549          | 53217906 | A | 0 | 0 | G |
| 5 | BICF2P325845           | 53224077 | C | 0 | 0 | A |
| 5 | BICF2S23520698         | 53241675 | 0 | 0 | 0 | A |
| 5 | BICF2S2334544          | 53252611 | A | 0 | 0 | G |
| 5 | TIGRP2P72860_rs9147420 | 53266203 | A | 0 | 0 | G |
| 5 | BICF2S23118328         | 53272803 | G | 0 | 0 | A |
| 5 | BICF2S2343001          | 53279732 | 0 | 0 | 0 | G |
| 5 | BICF2P132698           | 53292621 | G | 0 | 0 | A |
| 5 | BICF2P720673           | 53309907 | A | 0 | 0 | G |
| 5 | BICF2P1163368          | 53318812 | A | 0 | 0 | G |
| 5 | BICF2S23018058         | 53336490 | A | 0 | 0 | G |
| 5 | BICF2P586593           | 53344207 | G | 0 | 0 | C |
| 5 | BICF2P1324481          | 53364577 | A | 0 | 0 | G |
| 5 | TIGRP2P72882_rs8865436 | 53371173 | G | 0 | 0 | A |
| 5 | BICF2P845796           | 53380092 | A | 0 | 0 | G |
| 5 | BICF2P291789           | 53392305 | G | 0 | 0 | A |
| 5 | BICF2P1386757          | 53396144 | A | 1 | 1 | G |
| 5 | BICF2P1340165          | 53423246 | A | 0 | 0 | G |
| 5 | BICF2P857994           | 53435286 | A | 0 | 0 | T |
| 5 | TIGRP2P72914_rs8652483 | 53448970 | G | 0 | 0 | A |
| 5 | BICF2P1280245          | 53459506 | A | 1 | 1 | G |
| 5 | BICF2P421194           | 53461225 | A | 0 | 0 | G |
| 5 | BICF2P590986           | 53469682 | A | 0 | 0 | G |
| 5 | BICF2P614014           | 53476408 | A | 1 | 1 | G |
| 5 | TIGRP2P72939_rs8773747 | 53494666 | G | 0 | 0 | A |
| 5 | BICF2P791083           | 53498243 | C | 0 | 0 | A |
| 5 | BICF2S23619668         | 53511523 | A | 0 | 0 | G |
| 5 | TIGRP2P72947_rs9091807 | 53530171 | 0 | 0 | 0 | A |
| 5 | BICF2P1091264          | 53545048 | A | 1 | 1 | G |
| 5 | BICF2P623795           | 53563492 | A | 1 | 1 | C |
| 5 | BICF2P297774           | 53570728 | A | 1 | 1 | G |

|   |                        |          |   |   |        |   |
|---|------------------------|----------|---|---|--------|---|
| 5 | BICF2S23427581         | 53582312 | A | 0 | 0      | G |
| 5 | BICF2P240089           | 53597746 | A | 1 | 1      | G |
| 5 | TIGRP2P72958_rs8595976 | 53609386 | G | 0 | 0      | A |
| 5 | BICF2P1147423          | 53626894 | C | 1 | 1      | A |
| 5 | BICF2P427240           | 53636271 | G | 1 | 1      | A |
| 5 | BICF2P289565           | 53655034 | A | 0 | 0      | G |
| 5 | BICF2P650212           | 53664074 | A | 0 | 0      | G |
| 5 | BICF2S2298298          | 53673377 | A | 0 | 0      | G |
| 5 | BICF2P404783           | 53687444 | G | 0 | 0.2857 | A |
| 5 | BICF2P1287283          | 53701768 | A | 1 | 0.7143 | C |
| 5 | BICF2P1915             | 53710448 | T | 1 | 0.7143 | A |
| 5 | BICF2P1022554          | 53720288 | 0 | 0 | 0      | A |
| 5 | BICF2P728579           | 53735814 | G | 1 | 1      | A |
| 5 | BICF2S23044413         | 53743192 | A | 0 | 0      | C |
| 5 | BICF2P1162831          | 53751794 | A | 1 | 1      | C |
| 5 | BICF2P1033898          | 53768573 | G | 1 | 0.7143 | A |
| 5 | TIGRP2P72998_rs8991510 | 53776936 | A | 1 | 1      | G |
| 5 | BICF2P1289100          | 53796144 | C | 1 | 0.7143 | G |
| 5 | TIGRP2P73008_rs8616224 | 53796343 | C | 1 | 1      | G |
| 5 | TIGRP2P73009_rs8616226 | 53797457 | G | 1 | 1      | A |
| 5 | BICF2P655673           | 53813197 | C | 0 | 0      | G |
| 5 | TIGRP2P73026_rs8803245 | 53820695 | A | 0 | 0.2857 | G |
| 5 | TIGRP2P73036_rs9090878 | 53834903 | A | 1 | 0.7143 | C |
| 5 | BICF2S22930406         | 53857263 | G | 1 | 1      | A |
| 5 | BICF2P206746           | 53868645 | T | 1 | 0.7143 | A |
| 5 | BICF2P1187649          | 53879069 | A | 1 | 1      | C |
| 5 | BICF2P576789           | 53899318 | G | 0 | 0      | A |
| 5 | BICF2P1307722          | 53906797 | A | 0 | 0.2857 | G |
| 5 | BICF2P1024075          | 53922174 | A | 1 | 0.7143 | G |
| 5 | BICF2P571722           | 53927834 | A | 1 | 1      | G |
| 5 | TIGRP2P73097_rs9216599 | 53941386 | G | 0 | 0.2857 | A |
| 5 | BICF2S23252373         | 53965840 | G | 0 | 0      | A |
| 5 | BICF2P988690           | 53977500 | C | 1 | 0.7143 | A |
| 5 | BICF2P1084522          | 53984611 | G | 1 | 0.7143 | A |
| 5 | TIGRP2P73111_rs8638496 | 54002497 | A | 0 | 0      | G |
| 5 | BICF2P1062905          | 54015148 | A | 1 | 1      | G |
| 5 | TIGRP2P73125_rs8647601 | 54017712 | G | 0 | 0      | A |
| 5 | BICF2P406736           | 54031599 | G | 0 | 0      | A |
| 5 | BICF2S2301754          | 54052233 | G | 0 | 0      | A |
| 5 | BICF2P1041109          | 54066642 | A | 0 | 0      | G |
| 5 | TIGRP2P73173_rs9192893 | 54073853 | G | 0 | 0      | A |
| 5 | TIGRP2P73195_rs9075785 | 54101913 | 0 | 0 | 0      | A |
| 5 | BICF2P471600           | 54116203 | G | 0 | 0      | A |
| 5 | BICF2P1242746          | 54119668 | 0 | 0 | 0      | A |
| 5 | BICF2P529554           | 54130772 | A | 0 | 0      | G |
| 5 | BICF2P279210           | 54142978 | C | 0 | 0      | A |
| 5 | BICF2P425661           | 54167590 | 0 | 0 | 0      | A |

|   |                        |          |   |   |        |   |
|---|------------------------|----------|---|---|--------|---|
| 5 | BICF2P334751           | 54181238 | G | 0 | 0      | A |
| 5 | BICF2P132146           | 54209078 | A | 0 | 0      | G |
| 5 | TIGRP2P73235_rs9103464 | 54215489 | 0 | 0 | 0      | G |
| 5 | BICF2P378508           | 54231348 | A | 0 | 0      | C |
| 5 | TIGRP2P73253_rs8764434 | 54246492 | A | 0 | 0      | G |
| 5 | BICF2S2339970          | 54265601 | G | 0 | 0      | A |
| 5 | BICF2S23123459         | 54274262 | G | 1 | 1      | A |
| 5 | TIGRP2P73280_rs8716956 | 54293460 | G | 1 | 1      | A |
| 5 | TIGRP2P73287_rs8688696 | 54314200 | A | 0 | 0      | G |
| 5 | BICF2P1336778          | 54333422 | A | 0 | 0      | G |
| 5 | BICF2S23349827         | 54338697 | A | 0 | 0      | C |
| 5 | BICF2P1349570          | 54356315 | G | 0 | 0      | A |
| 5 | BICF2S23332356         | 54360526 | G | 0 | 0      | A |
| 5 | TIGRP2P73305_rs9166594 | 54375408 | A | 0 | 0      | G |
| 5 | BICF2P982367           | 54388000 | 0 | 0 | 0      | C |
| 5 | TIGRP2P73313_rs8495446 | 54395396 | 0 | 0 | 0      | G |
| 5 | BICF2P1361406          | 54413166 | A | 1 | 1      | C |
| 5 | BICF2S2343004          | 54422388 | C | 0 | 0      | A |
| 5 | TIGRP2P73335_rs8608516 | 54438251 | G | 1 | 1      | A |
| 5 | BICF2P1151094          | 54442717 | G | 0 | 0      | A |
| 5 | BICF2P796192           | 54452960 | A | 0 | 0      | G |
| 5 | TIGRP2P73348_rs8989397 | 54474478 | A | 0 | 0      | G |
| 5 | TIGRP2P73350_rs9155015 | 54475715 | A | 0 | 0      | G |
| 5 | BICF2P595972           | 54491755 | G | 0 | 0      | A |
| 5 | TIGRP2P73372_rs9062018 | 54515573 | A | 0 | 0      | C |
| 5 | BICF2P1110259          | 54521656 | A | 1 | 1      | C |
| 5 | BICF2P926995           | 54543956 | C | 1 | 1      | A |
| 5 | BICF2P580306           | 54554829 | A | 0 | 0      | G |
| 5 | BICF2P1124104          | 54564821 | C | 0 | 0      | A |
| 5 | TIGRP2P73415_rs9136142 | 54565830 | C | 0 | 0      | A |
| 5 | BICF2P388200           | 54568597 | C | 0 | 0      | A |
| 5 | BICF2P1395672          | 54572244 | G | 0 | 0      | C |
| 5 | BICF2P710089           | 54582216 | G | 1 | 1      | A |
| 5 | BICF2P710090           | 54582269 | G | 0 | 0      | A |
| 5 | BICF2P914363           | 54587936 | C | 1 | 1      | A |
| 5 | BICF2P346015           | 54591596 | A | 0 | 0      | G |
| 5 | BICF2P945533           | 54606497 | A | 1 | 1      | G |
| 5 | BICF2P626729           | 54614400 | C | 0 | 0      | A |
| 5 | BICF2P305702           | 54637609 | A | 0 | 0      | G |
| 5 | BICF2P434707           | 54650283 | A | 0 | 0      | G |
| 5 | BICF2P1083180          | 54663649 | G | 0 | 0      | A |
| 5 | BICF2S23427002         | 54672536 | A | 1 | 0.7143 | C |
| 5 | BICF2S23634774         | 54689288 | A | 1 | 0.7143 | C |
| 5 | BICF2P641943           | 54696564 | G | 1 | 0.7143 | A |
| 5 | BICF2P1133974          | 54699216 | A | 1 | 0.7143 | G |
| 5 | BICF2P10642            | 54703444 | A | 1 | 0.7143 | C |
| 5 | BICF2P163180           | 54712984 | G | 1 | 0.7143 | A |

|   |                        |          |   |   |        |   |
|---|------------------------|----------|---|---|--------|---|
| 5 | BICF2P217209           | 54728145 | A | 0 | 0      | C |
| 5 | TIGRP2P73441_rs8656989 | 54734323 | 0 | 0 | 0      | A |
| 5 | BICF2P93211            | 54743982 | A | 0 | 0      | G |
| 5 | BICF2P380874           | 54758429 | 0 | 0 | 0      | A |
| 5 | BICF2P1145021          | 54767869 | A | 0 | 0      | C |
| 5 | BICF2P279387           | 54783511 | A | 0 | 0      | G |
| 5 | BICF2P1114380          | 54789239 | A | 0 | 0      | G |
| 5 | TIGRP2P73461_rs8691599 | 54798263 | A | 0 | 0      | G |
| 5 | BICF2S23229423         | 54816226 | A | 0 | 0      | G |
| 5 | BICF2P642286           | 54843106 | 0 | 0 | 0      | G |
| 5 | BICF2P642287           | 54843838 | 0 | 0 | 0      | A |
| 5 | TIGRP2P73469_rs8816552 | 54867315 | 0 | 0 | 0      | A |
| 5 | TIGRP2P73472_rs8885698 | 54879375 | 0 | 0 | 0      | A |
| 5 | BICF2S23547409         | 54892387 | A | 0 | 0      | G |
| 5 | TIGRP2P73474_rs8857033 | 54903342 | A | 0 | 0      | G |
| 5 | BICF2P114108           | 54915282 | 0 | 0 | 0      | A |
| 5 | BICF2S23658302         | 54930170 | C | 0 | 0      | A |
| 5 | BICF2S23517150         | 54944407 | T | 0 | 0      | A |
| 5 | BICF2S23033911         | 54962431 | 0 | 0 | 0      | C |
| 5 | BICF2P284000           | 54991421 | C | 0 | 0      | A |
| 5 | TIGRP2P73550_rs8955501 | 54995363 | A | 0 | 0      | C |
| 5 | BICF2S23161961         | 55007296 | G | 0 | 0      | A |
| 5 | BICF2S23660272         | 55026850 | T | 0 | 0      | A |
| 5 | BICF2S23351020         | 55043523 | G | 0 | 0      | A |
| 5 | BICF2P1404006          | 55061717 | 0 | 0 | 0      | C |
| 5 | TIGRP2P73555_rs8964490 | 55074181 | 0 | 0 | 0      | T |
| 5 | TIGRP2P73556_rs8914703 | 55102818 | A | 0 | 0.1429 | C |
| 5 | BICF2P1153745          | 55109050 | A | 0 | 0.1429 | G |
| 5 | BICF2S23052465         | 55121196 | C | 0 | 0      | A |
| 5 | TIGRP2P73571_rs9199026 | 55136460 | A | 0 | 0      | G |
| 5 | BICF2P1231219          | 55150726 | A | 0 | 0.1429 | G |
| 5 | BICF2S23122998         | 55158719 | G | 0 | 0      | A |
| 5 | BICF2S23133037         | 55166163 | G | 0 | 0      | A |
| 5 | BICF2P1236411          | 55182542 | G | 1 | 1      | A |
| 5 | BICF2P1236407          | 55182885 | G | 0 | 0      | A |
| 5 | BICF2P1148990          | 55212186 | G | 0 | 0      | A |
| 5 | BICF2P1439605          | 55224932 | G | 1 | 0.8571 | A |
| 5 | TIGRP2P73615_rs8953511 | 55242154 | G | 1 | 0.8571 | A |
| 5 | BICF2P671511           | 55253494 | G | 0 | 0      | A |
| 5 | TIGRP2P73625_rs8672880 | 55270216 | A | 0 | 0      | G |
| 5 | BICF2S2399594          | 55283003 | C | 0 | 0      | A |
| 5 | BICF2P1140554          | 55298562 | G | 0 | 0      | A |
| 5 | BICF2P1430426          | 55303493 | T | 0 | 0      | A |
| 5 | BICF2P612311           | 55305504 | A | 0 | 0      | G |
| 5 | BICF2S23033955         | 55317674 | G | 0 | 0      | A |
| 5 | TIGRP2P73637_rs8689653 | 55341696 | A | 0 | 0.1429 | C |
| 5 | BICF2S23521501         | 55385542 | A | 0 | 0      | G |

|   |                        |          |   |   |        |   |
|---|------------------------|----------|---|---|--------|---|
| 5 | TIGRP2P73649_rs8531435 | 55402922 | A | 0 | 0      | G |
| 5 | BICF2P495439           | 55415152 | A | 0 | 0      | G |
| 5 | TIGRP2P73652_rs8754614 | 55419100 | G | 0 | 0.1429 | A |
| 5 | BICF2P215300           | 55435469 | A | 0 | 0.1429 | G |
| 5 | BICF2P1166272          | 55451006 | G | 0 | 0      | A |
| 5 | BICF2S23755139         | 55474311 | G | 1 | 0.8571 | C |
| 5 | BICF2S23750469         | 55478061 | A | 0 | 0.1429 | G |
| 5 | BICF2P625705           | 55500310 | G | 0 | 0      | C |
| 5 | TIGRP2P73671_rs9040148 | 55505982 | G | 0 | 0      | C |
| 5 | BICF2P1185405          | 55513332 | A | 1 | 1      | G |
| 5 | BICF2P835463           | 55527379 | A | 0 | 0      | G |
| 5 | BICF2P835464           | 55528241 | T | 1 | 1      | A |
| 5 | BICF2S23722833         | 55536121 | G | 0 | 0      | A |
| 5 | BICF2P345316           | 55547618 | G | 0 | 0      | A |
| 5 | BICF2P1254176          | 55560906 | C | 0 | 0      | A |
| 5 | BICF2P95061            | 55575451 | G | 1 | 1      | A |
| 5 | BICF2S23447550         | 55580160 | C | 1 | 0.8571 | A |
| 5 | BICF2P384981           | 55595164 | C | 0 | 0.1429 | A |
| 5 | BICF2P561184           | 55602030 | T | 0 | 0      | A |
| 5 | BICF2S23346221         | 55608357 | 0 | 0 | 0      | A |
| 5 | BICF2P442900           | 55620169 | A | 0 | 0.1429 | C |
| 5 | BICF2S23454554         | 55660427 | A | 0 | 0      | G |
| 5 | BICF2P478343           | 55673388 | G | 1 | 1      | A |
| 5 | BICF2S23110842         | 55726278 | T | 0 | 0      | A |
| 5 | BICF2P865506           | 55730734 | A | 0 | 0.1429 | G |
| 5 | TIGRP2P73719_rs8796772 | 55741910 | A | 0 | 0      | G |
| 5 | BICF2P560403           | 55761999 | G | 0 | 0.1429 | A |
| 5 | BICF2P560412           | 55763554 | A | 0 | 0.1429 | G |
| 5 | BICF2P170588           | 55780623 | A | 1 | 0.8571 | G |
| 5 | BICF2P441225           | 55819622 | 0 | 0 | 0      | G |
| 5 | BICF2S24112818         | 55821177 | 0 | 0 | 0      | G |
| 5 | BICF2P1062625          | 55835501 | 0 | 0 | 0      | A |
| 5 | BICF2P668730           | 55853387 | 0 | 0 | 0      | A |
| 5 | BICF2P1122012          | 55882369 | G | 1 | 1      | A |
| 5 | BICF2P577823           | 55891675 | A | 1 | 1      | G |
| 5 | BICF2P1040203          | 55909751 | G | 0 | 0.1429 | A |
| 5 | BICF2P655614           | 55914457 | 0 | 0 | 0      | G |
| 5 | BICF2P892826           | 55925426 | G | 0 | 0.1429 | A |
| 5 | BICF2P116815           | 55942562 | A | 1 | 1      | G |
| 5 | BICF2P942932           | 55954218 | G | 1 | 0.8571 | A |
| 5 | BICF2P874797           | 55967186 | A | 0 | 0      | G |
| 5 | TIGRP2P73761_rs9065473 | 55976235 | A | 0 | 0      | T |
| 5 | BICF2S23426150         | 55987596 | C | 1 | 1      | A |
| 5 | BICF2P1014265          | 55991538 | G | 0 | 0      | A |
| 5 | BICF2S23623906         | 55997198 | A | 1 | 0.8571 | G |
| 5 | BICF2P99989            | 56015697 | G | 0 | 0      | A |
| 5 | BICF2P1425293          | 56017287 | G | 0 | 0      | A |

|   |                        |          |   |   |         |   |
|---|------------------------|----------|---|---|---------|---|
| 5 | BICF2P619042           | 56048456 | G | 1 | 0.8571  | A |
| 5 | BICF2P735711           | 56051983 | C | 1 | 0.8571  | G |
| 5 | BICF2P305086           | 56071527 | 0 | 0 | 0       | G |
| 5 | BICF2P1171382          | 56077015 | A | 1 | 1       | G |
| 5 | BICF2P520787           | 56078029 | G | 1 | 1       | A |
| 5 | BICF2P417250           | 56093037 | A | 1 | 1       | G |
| 5 | BICF2S23012036         | 56099182 | A | 0 | 0       | G |
| 5 | BICF2P125723           | 56109903 | C | 1 | 1       | A |
| 5 | BICF2P66983            | 56126773 | 0 | 0 | 0       | A |
| 5 | BICF2P1361849          | 56147328 | G | 1 | 1       | A |
| 5 | BICF2P1453921          | 56162384 | G | 0 | 0       | A |
| 5 | BICF2P338915           | 56167610 | G | 0 | 0       | A |
| 5 | BICF2P103684           | 56184112 | G | 0 | 0.1429  | A |
| 5 | BICF2P21235            | 56199928 | G | 1 | 1       | A |
| 5 | BICF2S2374826          | 56216652 | A | 0 | 0       | G |
| 5 | BICF2P415323           | 56232363 | A | 0 | 0.1429  | G |
| 5 | BICF2P938692           | 56235165 | C | 1 | 1       | A |
| 5 | BICF2P123925           | 56270416 | 0 | 0 | 0       | A |
| 5 | BICF2P1262146          | 56326911 | A | 0 | 0.1429  | G |
| 5 | BICF2P115705           | 56341206 | G | 0 | 0       | A |
| 5 | BICF2P226666           | 56357691 | A | 1 | 0.8571  | G |
| 5 | BICF2P59539            | 56364732 | 0 | 0 | 0       | A |
| 5 | BICF2S22963273         | 56379568 | A | 0 | 0.1429  | G |
| 5 | BICF2P957897           | 56393870 | A | 0 | 0       | G |
| 5 | BICF2S23654220         | 56400446 | G | 0 | 0.1429  | A |
| 5 | BICF2P1419536          | 56420999 | A | 1 | 1       | G |
| 5 | BICF2P696143           | 56448301 | A | 0 | 0.1429  | G |
| 5 | TIGRP2P73810_rs8738272 | 56461302 | 0 | 0 | 0       | C |
| 5 | BICF2P213318           | 56478336 | A | 0 | 0.1429  | G |
| 5 | BICF2P599784           | 56491050 | A | 0 | 0       | G |
| 5 | BICF2P1346770          | 56509464 | 0 | 0 | 0       | G |
| 5 | BICF2P460294           | 56512422 | A | 0 | 0.1429  | G |
| 5 | BICF2S23624472         | 56534479 | G | 0 | 0       | A |
| 5 | TIGRP2P73813_rs8866094 | 56547694 | 0 | 0 | 0       | C |
| 5 | BICF2P287589           | 56565288 | A | 1 | 1       | G |
| 5 | BICF2P1424794          | 56568134 | C | 1 | 1       | A |
| 5 | BICF2P1207646          | 56569000 | A | 1 | 1       | G |
| 5 | BICF2P500586           | 56571560 | A | 1 | 1       | G |
| 5 | BICF2P669228           | 56584643 | G | 0 | 0.1429  | A |
| 5 | BICF2P507129           | 56591899 | C | 0 | 0       | A |
| 5 | BICF2P134523           | 56606405 | 0 | 0 | 0       | A |
| 5 | BICF2S23751438         | 56616662 | G | 0 | 0       | A |
| 5 | BICF2P5275             | 56648359 | G | 0 | 0.08333 | A |
| 5 | BICF2S23643500         | 56658005 | A | 0 | 0       | G |
| 5 | BICF2P356200           | 56661767 | A | 0 | 0       | C |
| 5 | BICF2P514039           | 56682739 | C | 0 | 0       | A |
| 5 | BICF2S23649940         | 56687597 | 0 | 0 | 0       | A |

|   |                        |          |   |    |        |   |
|---|------------------------|----------|---|----|--------|---|
| 5 | BICF2P296772           | 56698636 | 0 | 0  | 0      | G |
| 5 | BICF2P297574           | 56712768 | A | 0  | 0.1429 | G |
| 5 | BICF2P1425500          | 56720005 | A | 1  | 0.8571 | G |
| 5 | BICF2P93073            | 56730511 | 0 | 0  | 0      | A |
| 5 | BICF2P156295           | 56751662 | G | 0  | 0      | A |
| 5 | BICF2P1451725          | 56757988 | A | 0  | 0      | G |
| 5 | BICF2P1331513          | 56762997 | A | 1  | 0.8571 | G |
| 5 | BICF2P949000           | 56767647 | G | 0  | 0      | A |
| 5 | BICF2P530111           | 56785060 | A | 0  | 0      | G |
| 5 | BICF2P1295926          | 56808156 | G | 0  | 0      | A |
| 5 | BICF2P520189           | 56813401 | 0 | 0  | 0      | G |
| 5 | BICF2P296260           | 56821902 | A | 0  | 0      | G |
| 5 | G348f29S259            | 56838815 | 0 | NA | 0      | A |
| 5 | TIGRP2P73817_rs9151544 | 56854895 | 0 | 0  | 0      | A |
| 5 | BICF2P1311036          | 56867094 | A | 0  | 0.1429 | G |
| 5 | BICF2P277677           | 56871806 | A | 0  | 0.1429 | T |
| 5 | BICF2P136419           | 56901789 | 0 | 0  | 0      | G |
| 5 | G349f38S161            | 56927943 | A | 0  | 0.1429 | G |
| 5 | BICF2S22960475         | 56958729 | G | 0  | 0.1429 | A |
| 5 | BICF2P1438467          | 56961693 | A | 0  | 0      | G |
| 5 | BICF2P884891           | 56982084 | A | 0  | 0      | G |
| 5 | BICF2P852466           | 57014208 | 0 | 0  | 0      | G |
| 5 | BICF2P1183078          | 57017031 | 0 | 0  | 0      | A |
| 5 | BICF2P1135106          | 57032184 | 0 | 0  | 0      | G |
| 5 | BICF2P206666           | 57074141 | C | 1  | 1      | A |
| 5 | BICF2P1008946          | 57077615 | A | 0  | 0      | G |
| 5 | BICF2P679597           | 57094031 | G | 1  | 1      | A |
| 5 | BICF2P449153           | 57101015 | A | 0  | 0      | G |
| 5 | BICF2P728930           | 57110117 | C | 0  | 0      | A |
| 5 | BICF2S23646198         | 57128137 | A | 0  | 0      | C |
| 5 | BICF2P1412444          | 57155207 | A | 0  | 0      | G |
| 5 | BICF2P1037474          | 57168752 | A | 0  | 0      | C |
| 5 | BICF2P77326            | 57180161 | A | 1  | 1      | G |
| 5 | TIGRP2P73821_rs9167540 | 57196387 | 0 | 0  | 0      | G |
| 5 | BICF2S23449404         | 57204210 | G | 0  | 0.1429 | A |
| 5 | BICF2S23256201         | 57217847 | G | 1  | 1      | A |
| 5 | BICF2S23720220         | 57232502 | G | 1  | 0.8571 | A |
| 5 | BICF2P650512           | 57241072 | A | 0  | 0.1429 | G |
| 5 | BICF2S23643009         | 57251901 | A | 0  | 0.1429 | G |
| 5 | BICF2P183298           | 57264745 | A | 1  | 1      | G |
| 5 | BICF2P1283419          | 57282425 | A | 0  | 0.1429 | G |
| 5 | BICF2P243218           | 57301363 | 0 | 0  | 0      | A |
| 5 | BICF2S23616008         | 57314907 | G | 1  | 0.8571 | A |
| 5 | BICF2S23120710         | 57322976 | A | 1  | 0.8571 | G |
| 5 | BICF2S23031741         | 57338144 | A | 1  | 0.8571 | G |
| 5 | BICF2P184880           | 57343627 | G | 1  | 0.8571 | A |
| 5 | BICF2P207683           | 57354035 | A | 1  | 0.8571 | G |

|   |                        |          |   |   |        |   |
|---|------------------------|----------|---|---|--------|---|
| 5 | BICF2P721170           | 57366389 | A | 1 | 0.8571 | G |
| 5 | BICF2P828526           | 57374914 | G | 1 | 0.8571 | A |
| 5 | BICF2P1390528          | 57392208 | G | 1 | 1      | C |
| 5 | BICF2P853840           | 57402580 | C | 1 | 1      | G |
| 5 | BICF2S2311289          | 57417789 | A | 0 | 0      | G |
| 5 | BICF2S23763447         | 57440117 | G | 0 | 0.1429 | A |
| 5 | BICF2P1033222          | 57452175 | A | 1 | 0.8571 | G |
| 5 | BICF2S23143997         | 57454080 | A | 0 | 0      | C |
| 5 | BICF2P590622           | 57492656 | A | 0 | 0.1429 | G |
| 5 | BICF2P1413095          | 57501346 | A | 0 | 0      | G |
| 5 | BICF2P1012952          | 57516231 | A | 0 | 0      | G |
| 5 | BICF2S23754149         | 57537811 | G | 0 | 0      | A |
| 5 | TIGRP2P73826_rs8614351 | 57589528 | 0 | 0 | 0      | G |
| 5 | BICF2S23137199         | 57593274 | G | 1 | 1      | A |
| 5 | BICF2P560343           | 57604668 | 0 | 0 | 0      | A |
| 5 | BICF2P164781           | 57618197 | A | 0 | 0.1429 | C |
| 5 | BICF2P1079460          | 57636971 | A | 0 | 0.1429 | G |
| 5 | BICF2P1049308          | 57643185 | G | 0 | 0.1429 | A |
| 5 | BICF2S23423876         | 57676511 | G | 0 | 0.2857 | A |
| 5 | BICF2P1363293          | 57708716 | C | 0 | 0.2    | A |
| 5 | TIGRP2P73828_rs8624577 | 57728231 | 0 | 0 | 0      | G |
| 5 | BICF2P637072           | 57736572 | A | 0 | 0.1429 | G |
| 5 | BICF2P618438           | 57737874 | A | 0 | 0.1429 | G |
| 5 | BICF2P540679           | 57744956 | A | 0 | 0.1429 | G |
| 5 | BICF2P1409826          | 57766215 | 0 | 0 | 0      | A |
| 5 | BICF2S23134807         | 57783220 | A | 0 | 0      | C |
| 5 | BICF2P1320133          | 57804395 | A | 0 | 0.1429 | G |
| 5 | BICF2S23518229         | 57811123 | G | 0 | 0.1429 | A |
| 5 | BICF2P931809           | 57843352 | A | 0 | 0      | C |
| 5 | BICF2P262071           | 57849566 | 0 | 0 | 0      | C |
| 5 | BICF2P130934           | 57867594 | 0 | 0 | 0      | A |
| 5 | BICF2P164739           | 57878270 | 0 | 0 | 0      | A |
| 5 | BICF2P891262           | 57887172 | A | 0 | 0      | G |
| 5 | BICF2S23717988         | 57893453 | A | 0 | 0      | G |
| 5 | BICF2P1232732          | 57903612 | G | 0 | 0      | C |
| 5 | BICF2P1158852          | 57915134 | G | 0 | 0      | A |
| 5 | BICF2P652278           | 57954486 | G | 0 | 0      | A |
| 5 | BICF2P354429           | 57968053 | A | 0 | 0.1429 | G |
| 5 | BICF2P176489           | 57983543 | A | 0 | 0.1429 | G |
| 5 | BICF2P832744           | 57995875 | A | 0 | 0.1429 | T |
| 5 | BICF2P3419             | 58008377 | 0 | 0 | 0      | A |
| 5 | BICF2S23021451         | 58033215 | A | 1 | 0.8571 | G |
| 5 | BICF2S2364117          | 58070017 | A | 0 | 0.2857 | G |
| 5 | BICF2P885328           | 58084565 | A | 0 | 0      | G |
| 5 | BICF2S23216522         | 58089339 | G | 0 | 0      | A |
| 5 | BICF2P673585           | 58119200 | C | 0 | 0.2857 | A |
| 5 | BICF2P1431760          | 58124167 | 0 | 0 | 0      | A |



|   |                        |          |   |   |        |   |
|---|------------------------|----------|---|---|--------|---|
| 5 | BICF2P133848           | 58140219 | 0 | 0 | 0      | G |
| 5 | BICF2S23647936         | 58144866 | A | 0 | 0      | G |
| 5 | BICF2S23044774         | 58157756 | A | 0 | 0      | G |
| 5 | BICF2S23717817         | 58169929 | G | 0 | 0      | A |
| 5 | BICF2P1111142          | 58220621 | 0 | 0 | 0      | G |
| 5 | BICF2P66756            | 58235967 | 0 | 0 | 0      | G |
| 5 | BICF2P1025407          | 58241006 | A | 1 | 0.7143 | G |
| 5 | BICF2P32366            | 58256046 | A | 1 | 1      | G |
| 5 | BICF2P1165068          | 58267199 | A | 0 | 0      | G |
| 5 | BICF2S23732228         | 58274716 | G | 1 | 0.8571 | A |
| 5 | BICF2S23051512         | 58291053 | C | 1 | 0.8571 | G |
| 5 | BICF2P1455635          | 58296743 | 0 | 0 | 0      | G |
| 5 | BICF2S23313815         | 58308989 | A | 0 | 0.1429 | G |
| 5 | TIGRP2P73846_rs8929884 | 58327930 | 0 | 0 | 0      | G |
| 5 | BICF2S2327675          | 58333238 | A | 0 | 0.1429 | G |
| 5 | BICF2P548766           | 58344660 | 0 | 0 | 0      | G |
| 5 | BICF2P496837           | 58351443 | A | 1 | 0.9167 | G |
| 5 | BICF2P655028           | 58378311 | 0 | 0 | 0      | C |
| 5 | BICF2P140412           | 58394201 | 0 | 0 | 0      | G |
| 5 | BICF2P180121           | 58427413 | 0 | 0 | 0      | A |
| 5 | BICF2S23160788         | 58448372 | 0 | 0 | 0      | G |
| 5 | BICF2S2399924          | 58461937 | A | 0 | 0.1429 | G |
| 5 | BICF2P1127509          | 58465014 | G | 0 | 0.1429 | A |
| 5 | BICF2S23530901         | 58469767 | C | 0 | 0      | A |
| 5 | BICF2P859521           | 58483247 | G | 0 | 0.2857 | A |
| 5 | TIGRP2P73848_rs9164005 | 58492322 | 0 | 0 | 0      | C |
| 5 | BICF2P687109           | 58510047 | G | 1 | 1      | A |
| 5 | BICF2P606241           | 58523440 | A | 1 | 0.7143 | G |
| 5 | BICF2P1208954          | 58527562 | G | 0 | 0.1429 | A |
| 5 | BICF2S23758199         | 58536201 | C | 0 | 0      | A |
| 5 | BICF2S2335536          | 58549508 | A | 0 | 0      | G |
| 5 | BICF2S23635090         | 58590938 | G | 0 | 0      | A |
| 5 | BICF2P1034640          | 58614993 | G | 0 | 0      | A |
| 5 | BICF2P384451           | 58616905 | G | 0 | 0      | A |
| 5 | BICF2P815877           | 58630166 | G | 0 | 0.1429 | A |
| 5 | BICF2P1166755          | 58649092 | G | 0 | 0      | A |
| 5 | BICF2S233824           | 58657699 | A | 0 | 0      | G |
| 5 | BICF2P973678           | 58666248 | A | 0 | 0.1429 | G |
| 5 | BICF2P29371            | 58673493 | A | 0 | 0      | G |
| 5 | BICF2S23644875         | 58686741 | A | 0 | 0      | G |
| 5 | BICF2P86068            | 58699817 | A | 1 | 0.7143 | T |
| 5 | BICF2S2337585          | 58707692 | A | 0 | 0.1429 | G |
| 5 | BICF2P76776            | 58720278 | A | 0 | 0.1429 | G |
| 5 | BICF2P1037429          | 58735478 | A | 0 | 0.1429 | G |
| 5 | BICF2S2348206          | 58750699 | G | 0 | 0      | A |
| 5 | BICF2S2374194          | 58761977 | A | 0 | 0      | G |
| 5 | BICF2S2374274          | 58765585 | A | 0 | 0      | G |

|   |                        |          |   |   |        |   |
|---|------------------------|----------|---|---|--------|---|
| 5 | BICF2S23451135         | 58790110 | G | 1 | 0.7143 | A |
| 5 | BICF2S2447028          | 58807639 | 0 | 0 | 0      | G |
| 5 | BICF2P829769           | 58812746 | 0 | 0 | 0      | C |
| 5 | BICF2P1411748          | 58824097 | G | 1 | 0.7143 | A |
| 5 | BICF2P723475           | 58861898 | A | 0 | 0      | G |
| 5 | BICF2S22955914         | 58887081 | G | 0 | 0      | A |
| 5 | BICF2P666334           | 58897049 | T | 0 | 0      | A |
| 5 | G350f28S66             | 58934767 | A | 0 | 0      | G |
| 5 | BICF2S23327776         | 58970656 | A | 0 | 0.1429 | G |
| 5 | BICF2P1246470          | 58986298 | A | 0 | 0      | G |
| 5 | BICF2P303707           | 59019257 | 0 | 0 | 0      | C |
| 5 | BICF2S23133419         | 59033520 | A | 0 | 0      | G |
| 5 | G351f19S158            | 59058333 | 0 | 0 | 0      | C |
| 5 | BICF2S22931227         | 59089267 | C | 0 | 0      | A |
| 5 | BICF2P1290359          | 59137606 | G | 0 | 0      | A |
| 5 | BICF2P1013393          | 59145414 | A | 0 | 0      | C |
| 5 | BICF2P376584           | 59172521 | A | 0 | 0      | G |
| 5 | BICF2P1399847          | 59181016 | 0 | 0 | 0      | A |
| 5 | BICF2P86010            | 59192287 | G | 0 | 0      | A |
| 5 | BICF2S23755890         | 59202762 | G | 0 | 0.1429 | A |
| 5 | BICF2P333047           | 59208734 | 0 | 0 | 0      | G |
| 5 | BICF2P528235           | 59226321 | G | 0 | 0.1429 | A |
| 5 | BICF2P1289805          | 59239424 | A | 1 | 0.8571 | C |
| 5 | BICF2P899650           | 59250849 | G | 0 | 0.1429 | A |
| 5 | BICF2S23536184         | 59257466 | G | 1 | 0.8571 | A |
| 5 | BICF2P1301992          | 59264746 | 0 | 0 | 0      | G |
| 5 | BICF2P1237403          | 59275431 | A | 1 | 0.8571 | G |
| 5 | BICF2P1030618          | 59286429 | A | 1 | 0.8571 | G |
| 5 | BICF2P200733           | 59296978 | G | 0 | 0      | A |
| 5 | BICF2P1451505          | 59328765 | C | 1 | 0.8571 | A |
| 5 | BICF2S23216682         | 59351226 | A | 0 | 0      | G |
| 5 | BICF2S23529355         | 59361569 | G | 1 | 0.8571 | A |
| 5 | BICF2P1108442          | 59365149 | A | 0 | 0      | G |
| 5 | TIGRP2P73867_rs9191093 | 59382844 | 0 | 0 | 0      | C |
| 5 | BICF2P73892            | 59411910 | A | 0 | 0      | G |
| 5 | BICF2P514268           | 59456285 | 0 | 0 | 0      | C |
| 5 | BICF2S23537627         | 59486408 | G | 1 | 0.8571 | A |
| 5 | BICF2S23018858         | 59510797 | 0 | 0 | 0      | G |
| 5 | BICF2P1171973          | 59522860 | 0 | 0 | 0      | G |
| 5 | BICF2S22963543         | 59554074 | A | 0 | 0      | G |
| 5 | BICF2S23554129         | 59572227 | C | 1 | 0.8571 | A |
| 5 | BICF2P1041396          | 59582705 | A | 0 | 0      | C |
| 5 | BICF2S23438281         | 59593771 | G | 0 | 0      | A |
| 5 | BICF2S2413175          | 59661467 | G | 0 | 0.1429 | A |
| 5 | BICF2P132009           | 59670036 | 0 | 0 | 0      | G |
| 5 | BICF2P1302363          | 59675059 | A | 1 | 0.8571 | C |
| 5 | BICF2S22955550         | 59686896 | 0 | 0 | 0      | C |

|   |                        |          |   |   |        |   |
|---|------------------------|----------|---|---|--------|---|
| 5 | BICF2S23417359         | 59705789 | G | 1 | 0.8571 | A |
| 5 | BICF2S2355886          | 59716831 | T | 1 | 0.8571 | A |
| 5 | BICF2S23636715         | 59741152 | 0 | 0 | 0      | G |
| 5 | BICF2P641906           | 59745328 | 0 | 0 | 0      | G |
| 5 | BICF2S23250226         | 59784236 | A | 1 | 1      | G |
| 5 | BICF2S2354351          | 59791019 | C | 1 | 0.8571 | G |
| 5 | BICF2P324332           | 59803222 | 0 | 0 | 0      | A |
| 5 | BICF2P372348           | 59813421 | 0 | 0 | 0      | A |
| 5 | BICF2S23158542         | 59859030 | 0 | 0 | 0      | G |
| 5 | BICF2P854840           | 59875568 | 0 | 0 | 0      | A |
| 5 | BICF2S23533471         | 59900123 | A | 0 | 0      | G |
| 5 | BICF2P204770           | 59914675 | 0 | 0 | 0      | C |
| 5 | BICF2P1245717          | 59923373 | A | 0 | 0      | T |
| 5 | BICF2S24311425         | 59927394 | G | 0 | 0      | A |
| 5 | BICF2P24404            | 59941583 | 0 | 0 | 0      | A |
| 5 | BICF2S23620705         | 59951359 | 0 | 0 | 0      | G |
| 5 | BICF2P7498             | 59969674 | A | 0 | 0      | G |
| 5 | BICF2P919944           | 59989288 | G | 0 | 0      | A |
| 5 | BICF2P164246           | 59995551 | 0 | 0 | 0      | C |
| 5 | BICF2P659174           | 60008650 | A | 1 | 0.8571 | G |
| 5 | BICF2P971364           | 60017973 | C | 0 | 0      | A |
| 5 | BICF2P573035           | 60029234 | A | 0 | 0      | G |
| 5 | BICF2P878456           | 60033083 | 0 | 0 | 0      | C |
| 5 | BICF2S22929699         | 60049801 | G | 0 | 0      | A |
| 5 | BICF2P322883           | 60057305 | A | 0 | 0.1429 | G |
| 5 | BICF2P365153           | 60062123 | A | 0 | 0      | G |
| 5 | BICF2S23655756         | 60063887 | A | 0 | 0      | G |
| 5 | BICF2P1307859          | 60065450 | A | 0 | 0      | G |
| 5 | BICF2P1266762          | 60079673 | A | 0 | 0      | G |
| 5 | BICF2P1460429          | 60089384 | A | 1 | 0.8571 | G |
| 5 | BICF2S23350610         | 60100621 | A | 0 | 0.1429 | C |
| 5 | BICF2S22964286         | 60112714 | A | 1 | 0.7143 | G |
| 5 | BICF2P1426032          | 60124549 | A | 0 | 0.1429 | G |
| 5 | BICF2P917755           | 60140618 | G | 0 | 0      | A |
| 5 | BICF2S23518605         | 60155859 | A | 1 | 0.7143 | G |
| 5 | TIGRP2P73874_rs8907494 | 60183342 | 0 | 0 | 0      | G |
| 5 | BICF2P135556           | 60195435 | 0 | 0 | 0      | A |
| 5 | BICF2P1168900          | 60206683 | G | 1 | 0.75   | A |
| 5 | BICF2P227260           | 60220126 | 0 | 0 | 0      | C |
| 5 | BICF2P309939           | 60228223 | 0 | 0 | 0      | C |
| 5 | BICF2P883839           | 60246112 | C | 1 | 0.7143 | A |
| 5 | BICF2P496082           | 60250571 | A | 1 | 0.875  | G |
| 5 | BICF2P1029667          | 60261977 | C | 1 | 0.7143 | A |
| 5 | BICF2P840319           | 60276317 | A | 1 | 0.7143 | G |
| 5 | BICF2P568092           | 60283617 | G | 1 | 0.7143 | A |
| 5 | BICF2S23658639         | 60302233 | A | 1 | 0.7143 | G |
| 5 | BICF2S23613937         | 60315043 | 0 | 0 | 0      | C |

|   |                        |          |   |   |        |   |
|---|------------------------|----------|---|---|--------|---|
| 5 | BICF2P716130           | 60325438 | A | 0 | 0      | C |
| 5 | BICF2P1071049          | 60349288 | A | 1 | 0.7143 | G |
| 5 | BICF2P224611           | 60352746 | 0 | 0 | 0      | G |
| 5 | BICF2P601              | 60372410 | A | 1 | 0.8571 | G |
| 5 | BICF2P649426           | 60379786 | A | 1 | 1      | G |
| 5 | BICF2P257149           | 60391081 | A | 1 | 0.7143 | C |
| 5 | BICF2P629229           | 60406125 | 0 | 0 | 0      | C |
| 5 | BICF2P1186456          | 60418721 | C | 0 | 0.1429 | A |
| 5 | BICF2P370959           | 60435609 | C | 0 | 0.1429 | G |
| 5 | BICF2S23146611         | 60454123 | A | 1 | 0.8571 | G |
| 5 | BICF2P1260976          | 60457620 | C | 1 | 0.8571 | A |
| 5 | BICF2P339176           | 60479042 | A | 0 | 0      | G |
| 5 | BICF2S23739501         | 60495282 | A | 1 | 0.7143 | G |
| 5 | BICF2S23745508         | 60502450 | A | 1 | 0.7143 | G |
| 5 | BICF2S23132895         | 60524086 | G | 1 | 0.8571 | A |
| 5 | BICF2S23042067         | 60525942 | A | 1 | 1      | G |
| 5 | BICF2P551347           | 60542162 | 0 | 0 | 0      | A |
| 5 | BICF2P1296243          | 60549519 | C | 0 | 0      | A |
| 5 | BICF2P430775           | 60561888 | G | 0 | 0      | A |
| 5 | BICF2P1000085          | 60576493 | G | 0 | 0      | A |
| 5 | BICF2S23137920         | 60582492 | G | 0 | 0      | A |
| 5 | BICF2P492463           | 60600758 | G | 0 | 0.1429 | A |
| 5 | BICF2P1224372          | 60605892 | A | 0 | 0.1429 | C |
| 5 | BICF2P1050290          | 60618077 | G | 0 | 0      | A |
| 5 | BICF2P930967           | 60637219 | A | 1 | 0.8571 | G |
| 5 | BICF2P306092           | 60647937 | G | 1 | 0.8571 | A |
| 5 | BICF2P426477           | 60650658 | A | 0 | 0      | G |
| 5 | BICF2P426491           | 60651669 | A | 1 | 1      | G |
| 5 | BICF2P1008528          | 60666131 | A | 0 | 0      | G |
| 5 | BICF2P545482           | 60693445 | A | 0 | 0      | G |
| 5 | BICF2P55220            | 60700019 | 0 | 0 | 0      | G |
| 5 | BICF2S23721356         | 60708612 | A | 0 | 0.1429 | C |
| 5 | BICF2P807942           | 60722738 | T | 0 | 0      | A |
| 5 | BICF2P684523           | 60734432 | 0 | 0 | 0      | A |
| 5 | BICF2P681320           | 60735904 | 0 | 0 | 0      | G |
| 5 | BICF2P224450           | 60751478 | A | 0 | 0      | G |
| 5 | BICF2P1291561          | 60760631 | G | 1 | 0.7143 | A |
| 5 | BICF2P1263770          | 60774189 | G | 0 | 0.1429 | A |
| 5 | BICF2P113158           | 60779790 | A | 0 | 0      | G |
| 5 | BICF2P275580           | 60790283 | A | 1 | 0.8571 | G |
| 5 | BICF2S23015528         | 60804420 | A | 0 | 0.1429 | G |
| 5 | BICF2S23158519         | 60819480 | A | 1 | 0.8571 | G |
| 5 | BICF2S23420988         | 60825225 | A | 0 | 0      | G |
| 5 | BICF2P576047           | 60840651 | A | 0 | 0      | G |
| 5 | BICF2P198906           | 60855772 | A | 0 | 0      | G |
| 5 | TIGRP2P73881_rs8961452 | 60862578 | 0 | 0 | 0      | C |
| 5 | BICF2S23644675         | 60875079 | G | 0 | 0.1429 | A |

|   |                        |          |   |   |        |   |
|---|------------------------|----------|---|---|--------|---|
| 5 | BICF2P543708           | 60882263 | 0 | 0 | 0      | C |
| 5 | BICF2S2309075          | 60895991 | G | 0 | 0.2857 | A |
| 5 | BICF2P701197           | 60902980 | 0 | 0 | 0      | C |
| 5 | BICF2S2344926          | 60912194 | G | 0 | 0.1429 | A |
| 5 | BICF2P1062567          | 60919189 | 0 | 0 | 0      | G |
| 5 | BICF2S23739122         | 60931806 | G | 0 | 0.1429 | A |
| 5 | BICF2S23022921         | 60944228 | G | 0 | 0.1429 | A |
| 5 | BICF2P585831           | 60959876 | 0 | 0 | 0      | C |
| 5 | BICF2S23013436         | 60964286 | G | 0 | 0      | A |
| 5 | BICF2P531176           | 60980808 | A | 0 | 0.1429 | G |
| 5 | BICF2P261246           | 60992066 | G | 0 | 0      | C |
| 5 | BICF2S23147246         | 61003015 | A | 0 | 0      | G |
| 5 | BICF2P926              | 61009539 | A | 0 | 0      | G |
| 5 | BICF2P615855           | 61020612 | C | 1 | 0.7143 | G |
| 5 | BICF2P789241           | 61029262 | G | 0 | 0.1429 | A |
| 5 | BICF2P938745           | 61033753 | A | 1 | 0.8571 | G |
| 5 | BICF2P308439           | 61044607 | A | 0 | 0.1429 | G |
| 5 | BICF2S23055692         | 61057940 | A | 1 | 0.7143 | G |
| 5 | BICF2S23612325         | 61070004 | A | 0 | 0      | G |
| 5 | BICF2S22951128         | 61072878 | A | 0 | 0.1429 | G |
| 5 | BICF2S23344066         | 61084402 | A | 0 | 0      | G |
| 5 | BICF2S23126597         | 61090881 | A | 1 | 0.7143 | G |
| 5 | BICF2S22964047         | 61101002 | A | 1 | 0.7143 | G |
| 5 | BICF2P1322256          | 61116175 | A | 0 | 0.1429 | G |
| 5 | BICF2P734496           | 61122335 | A | 1 | 0.8571 | C |
| 5 | BICF2S2338996          | 61130468 | G | 1 | 0.8571 | A |
| 5 | BICF2S22940587         | 61135750 | G | 0 | 0.1429 | A |
| 5 | BICF2P111279           | 61148211 | C | 1 | 0.7143 | G |
| 5 | TIGRP2P73884_rs8991562 | 61165204 | 0 | 0 | 0      | C |
| 5 | BICF2P838405           | 61175647 | G | 0 | 0      | A |
| 5 | BICF2S23034181         | 61184653 | G | 0 | 0.2857 | A |
| 5 | BICF2S23536448         | 61194707 | G | 0 | 0.1429 | A |
| 5 | BICF2P1323558          | 61207635 | 0 | 0 | 0      | G |
| 5 | BICF2P1031795          | 61221963 | A | 0 | 0      | G |
| 5 | BICF2P1097136          | 61228962 | G | 0 | 0      | A |
| 5 | BICF2P103106           | 61242034 | G | 0 | 0      | A |
| 5 | BICF2P502586           | 61250687 | A | 0 | 0      | G |
| 5 | BICF2P509456           | 61278980 | A | 0 | 0      | G |
| 5 | BICF2P369361           | 61288210 | 0 | 0 | 0      | G |
| 5 | BICF2P620440           | 61303054 | 0 | 0 | 0      | G |
| 5 | BICF2S24115746         | 61331312 | G | 0 | 0      | A |
| 5 | BICF2S23644248         | 61350080 | G | 0 | 0      | A |
| 5 | BICF2S23651339         | 61361959 | 0 | 0 | 0      | G |
| 5 | BICF2P1371030          | 61388118 | 0 | 0 | 0      | C |
| 5 | BICF2P787130           | 61409813 | 0 | 0 | 0      | G |
| 5 | BICF2P423861           | 61432360 | 0 | 0 | 0      | T |
| 5 | TIGRP2P73890_rs9187903 | 61437994 | 0 | 0 | 0      | C |

|   |                        |          |   |      |        |   |
|---|------------------------|----------|---|------|--------|---|
| 5 | BICF2S23629342         | 61453717 | G | 0    | 0.1429 | A |
| 5 | BICF2S23749773         | 61457202 | G | 0.25 | 0.2857 | A |
| 5 | BICF2S23759548         | 61479265 | A | 0    | 0.1429 | G |
| 5 | BICF2P1367053          | 61497389 | A | 0.25 | 0.2857 | G |
| 5 | BICF2S23629239         | 61497824 | A | 0.75 | 0.7143 | G |
| 5 | BICF2S23553461         | 61498887 | G | 0.75 | 0.7143 | A |
| 5 | BICF2P726067           | 61507357 | G | 0.25 | 0.1429 | A |
| 5 | BICF2S23654628         | 61524808 | A | 0    | 0      | C |
| 5 | BICF2P316254           | 61533129 | A | 0    | 0.1429 | G |
| 5 | BICF2P145549           | 61546076 | C | 0    | 0.1429 | A |
| 5 | BICF2S23320766         | 61548092 | G | 0    | 0.1429 | A |
| 5 | TIGRP2P73894_rs8875693 | 61563191 | 0 | 0    | 0      | A |
| 5 | BICF2P1198823          | 61575773 | 0 | 0    | 0      | G |
| 5 | BICF2P1386655          | 61598979 | 0 | 0    | 0      | C |
| 5 | BICF2P921696           | 61607925 | 0 | 0    | 0      | A |
| 5 | TIGRP2P73895_rs9140236 | 61628441 | 0 | 0    | 0      | G |
| 5 | BICF2S23347069         | 61632724 | A | 0.75 | 0.7143 | G |
| 5 | BICF2S23049013         | 61647863 | G | 0.75 | 0.7143 | A |
| 5 | BICF2P1025641          | 61662394 | G | 0.25 | 0.1429 | A |
| 5 | BICF2P1293606          | 61666432 | G | 0    | 0      | A |
| 5 | BICF2P25010            | 61671651 | A | 0    | 0.1429 | C |
| 5 | BICF2P578358           | 61676536 | G | 0    | 0.1429 | A |
| 5 | BICF2P154295           | 61704410 | C | 0.75 | 0.7143 | A |
| 5 | BICF2P990315           | 61710781 | G | 0.75 | 0.8571 | A |
| 5 | BICF2P204722           | 61721289 | G | 1    | 1      | A |
| 5 | BICF2P1364613          | 61726388 | C | 1    | 1      | G |
| 5 | BICF2S23742197         | 61726755 | C | 1    | 1      | G |
| 5 | BICF2P792978           | 61748350 | 0 | 0    | 0      | A |
| 5 | BICF2P917530           | 61760513 | A | 0.25 | 0.1429 | G |
| 5 | BICF2P1233480          | 61786333 | A | 0    | 0      | G |
| 5 | BICF2S24322835         | 61799697 | A | 0    | 0      | G |
| 5 | BICF2S23640766         | 61804936 | G | 0.75 | 0.8571 | C |
| 5 | BICF2P295506           | 61815695 | 0 | 0    | 0      | T |
| 5 | BICF2S23153845         | 61833676 | A | 0.25 | 0.1429 | C |
| 5 | BICF2S23410224         | 61842712 | A | 0.25 | 0.1429 | G |
| 5 | BICF2P771991           | 61855654 | G | 0.25 | 0.1429 | A |
| 5 | BICF2P1377532          | 61859810 | G | 0.25 | 0.1429 | A |
| 5 | BICF2P948872           | 61880881 | A | 0    | 0.1429 | G |
| 5 | BICF2S2323655          | 61885534 | G | 0.25 | 0.2857 | A |
| 5 | BICF2S23743523         | 61894381 | A | 0    | 0      | G |
| 5 | BICF2S23148902         | 61913657 | A | 0.25 | 0.2857 | G |
| 5 | BICF2S23018664         | 61928153 | 0 | 0    | 0      | G |
| 5 | BICF2S23450135         | 61939844 | A | 0    | 0.1429 | G |
| 5 | BICF2P1387692          | 61953132 | A | 0    | 0.1429 | C |
| 5 | BICF2P1417125          | 61972499 | A | 0    | 0      | C |
| 5 | BICF2P1249260          | 61979603 | G | 0.25 | 0.1429 | A |
| 5 | BICF2P652209           | 61990991 | A | 0.75 | 0.7143 | G |

|   |                        |          |   |      |         |   |
|---|------------------------|----------|---|------|---------|---|
| 5 | BICF2S23033273         | 62014826 | A | 0    | 0.1429  | G |
| 5 | BICF2P1056685          | 62022403 | 0 | 0    | 0       | G |
| 5 | BICF2P162259           | 62031503 | 0 | 0    | 0       | C |
| 5 | BICF2P110863           | 62050695 | A | 0    | 0       | C |
| 5 | BICF2P628228           | 62054806 | A | 0    | 0       | G |
| 5 | BICF2P230961           | 62067802 | A | 0    | 0       | G |
| 5 | BICF2P1385513          | 62070342 | C | 0    | 0       | A |
| 5 | BICF2S23748248         | 62088994 | A | 0    | 0       | G |
| 5 | BICF2P952785           | 62108424 | A | 0    | 0       | G |
| 5 | BICF2S23122797         | 62113347 | A | 0.75 | 0.7143  | C |
| 5 | BICF2P375889           | 62128119 | A | 0.75 | 0.7143  | G |
| 5 | BICF2S23114580         | 62134478 | A | 0.25 | 0.08333 | G |
| 5 | TIGRP2P73915_rs8564849 | 62144420 | 0 | 0    | 0       | A |
| 5 | BICF2P828236           | 62146702 | 0 | 0    | 0       | C |
| 5 | BICF2S23134813         | 62158552 | G | 0.25 | 0.1429  | A |
| 5 | BICF2P788297           | 62178178 | 0 | NA   | 0       | A |
| 5 | BICF2S23655820         | 62184572 | G | 0.25 | 0.1429  | A |
| 5 | BICF2P1302497          | 62194064 | 0 | 0    | 0       | G |
| 5 | BICF2P386638           | 62215937 | A | 0    | 0       | G |
| 5 | BICF2P195246           | 62243645 | C | 0    | 0       | A |
| 5 | BICF2P345338           | 62260333 | T | 0    | 0       | A |
| 5 | BICF2P1032             | 62262473 | A | 0.25 | 0.1429  | C |
| 5 | BICF2P494613           | 62281854 | 0 | 0    | 0       | A |
| 5 | BICF2P3735             | 62294933 | 0 | 0    | 0       | G |
| 5 | BICF2P395433           | 62305652 | A | 1    | 1       | G |
| 5 | BICF2S22951187         | 62312688 | G | NA   | 1       | A |
| 5 | BICF2P856717           | 62329417 | 0 | 0    | 0       | G |
| 5 | BICF2P663814           | 62331465 | 0 | 0    | 0       | G |
| 5 | BICF2P1306408          | 62349167 | A | 1    | 1       | G |
| 5 | BICF2P1129904          | 62356671 | T | 1    | 0.8571  | A |
| 5 | BICF2P1046219          | 62358943 | C | 0.25 | 0.1429  | A |
| 5 | BICF2P403862           | 62363747 | A | 0    | 0       | G |
| 5 | BICF2S23762207         | 62369677 | A | 0.75 | 0.7143  | G |
| 5 | BICF2P166943           | 62377852 | A | 0    | 0       | G |
| 5 | BICF2P1030100          | 62392561 | 0 | 0    | 0       | G |
| 5 | BICF2P883787           | 62408156 | A | 1    | 0.8571  | G |
| 5 | BICF2P162925           | 62412895 | G | 1    | 0.8571  | A |
| 5 | BICF2P941409           | 62424558 | G | 1    | 0.8571  | A |
| 5 | BICF2P967798           | 62437093 | G | 0    | 0       | A |
| 5 | BICF2S23757774         | 62445935 | A | 0    | 0       | G |
| 5 | BICF2P226251           | 62473659 | G | 0.25 | 0.1429  | A |
| 5 | BICF2P603693           | 62478402 | A | 1    | 1       | G |
| 5 | BICF2P1185301          | 62484399 | A | 0    | 0       | T |
| 5 | BICF2P314157           | 62488337 | G | 1    | 1       | A |
| 5 | BICF2P1218861          | 62497480 | A | 0    | 0       | G |
| 5 | BICF2S23139721         | 62497731 | A | 0.25 | 0.2857  | G |
| 5 | BICF2S23529341         | 62504166 | G | 0    | 0       | A |

|   |                        |          |   |      |        |   |
|---|------------------------|----------|---|------|--------|---|
| 5 | BICF2S22964157         | 62516475 | A | 0.75 | 0.7143 | G |
| 5 | BICF2P662028           | 62528476 | A | 0.75 | 0.7143 | G |
| 5 | BICF2P395661           | 62551398 | A | 0.75 | 0.7143 | G |
| 5 | BICF2S23742056         | 62568325 | G | 0    | 0      | A |
| 5 | BICF2S22951983         | 62572467 | G | 0    | 0      | A |
| 5 | BICF2P547063           | 62574151 | G | 0    | 0      | A |
| 5 | BICF2P547062           | 62574345 | G | 1    | 0.8571 | A |
| 5 | BICF2P451858           | 62587654 | 0 | 0    | 0      | C |
| 5 | BICF2P982582           | 62595780 | G | 0    | 0.1429 | A |
| 5 | BICF2S2298492          | 62607920 | A | 0    | 0.1429 | G |
| 5 | BICF2P1408505          | 62617296 | A | 0    | 0.1429 | G |
| 5 | BICF2P1134477          | 62620708 | A | 0    | 0      | G |
| 5 | BICF2P837559           | 62631864 | G | 0    | 0.1429 | A |
| 5 | BICF2P238860           | 62632720 | G | 0    | 0.1429 | A |
| 5 | BICF2P523496           | 62640790 | A | 0    | 0.1429 | G |
| 5 | BICF2S22923497         | 62655017 | A | 0    | 0.1429 | G |
| 5 | BICF2P314054           | 62664566 | 0 | 0    | 0      | G |
| 5 | BICF2P419954           | 62681603 | A | 0    | 0      | G |
| 5 | BICF2P864419           | 62697757 | G | 0    | 0.1429 | A |
| 5 | BICF2P43154            | 62704672 | A | 0    | 0.1429 | G |
| 5 | BICF2P644285           | 62717698 | G | 1    | 0.8571 | A |
| 5 | BICF2P599779           | 62721323 | A | 0.25 | 0.1429 | C |
| 5 | BICF2P284536           | 62737838 | C | 0.75 | 0.8571 | G |
| 5 | BICF2P340616           | 62739158 | A | 0.75 | 0.8571 | G |
| 5 | BICF2P586796           | 62748765 | G | 0    | 0      | A |
| 5 | BICF2S23617122         | 62762892 | A | 0    | 0      | G |
| 5 | BICF2P1065513          | 62769820 | A | 0.75 | 0.7143 | G |
| 5 | BICF2P109813           | 62791093 | C | 0.75 | 1      | A |
| 5 | BICF2P425961           | 62806275 | 0 | 0    | 0      | T |
| 5 | BICF2S2339876          | 62814100 | A | 0.25 | 0.1429 | G |
| 5 | BICF2S2305634          | 62825773 | A | 0    | 0      | C |
| 5 | BICF2P364621           | 62838076 | 0 | 0    | 0      | A |
| 5 | BICF2S23649793         | 62851384 | 0 | 0    | 0      | G |
| 5 | BICF2S23551305         | 62865891 | A | 0.25 | 0.1429 | G |
| 5 | BICF2S23551304         | 62866239 | A | 0.25 | 0.1429 | G |
| 5 | BICF2P381728           | 62875525 | 0 | 0    | 0      | G |
| 5 | BICF2P1130383          | 62881806 | A | 0.25 | 0.1429 | G |
| 5 | BICF2S23251419         | 62882935 | A | 0.25 | 0.1429 | G |
| 5 | BICF2P1471945          | 62899060 | A | 1    | 0.8571 | G |
| 5 | BICF2P734582           | 62906422 | A | 0.25 | 0.1429 | G |
| 5 | BICF2P895865           | 62920447 | G | 0.25 | 0.1429 | A |
| 5 | BICF2P779271           | 62928346 | A | 1    | 0.8571 | G |
| 5 | BICF2P779272           | 62928369 | A | 1    | 0.8571 | G |
| 5 | BICF2P150665           | 62929254 | C | 0.75 | 0.7143 | A |
| 5 | TIGRP2P73922_rs8706568 | 62944160 | 0 | 0    | 0      | C |
| 5 | BICF2P1247515          | 62960567 | 0 | 0    | 0      | G |
| 5 | BICF2P379558           | 62973600 | A | 0    | 0.1429 | G |



|   |                        |          |   |      |        |   |
|---|------------------------|----------|---|------|--------|---|
| 5 | BICF2S23542432         | 62977993 | A | 0    | 0.1429 | G |
| 5 | BICF2P58604            | 62985884 | A | 0.25 | 0.1429 | G |
| 5 | BICF2S23625200         | 63005709 | G | 0.75 | 0.7143 | A |
| 5 | BICF2P932245           | 63026179 | C | 1    | 0.75   | G |
| 5 | BICF2P533881           | 63037190 | A | 0    | 0      | G |
| 5 | BICF2P958242           | 63057251 | A | 0    | 0      | C |
| 5 | BICF2P398795           | 63076415 | A | 0.25 | 0.1429 | G |
| 5 | TIGRP2P73923_rs8816621 | 63088795 | 0 | 0    | 0      | G |
| 5 | TIGRP2P73925_rs8624162 | 63091516 | 0 | 0    | 0      | A |
| 5 | BICF2P203155           | 63107338 | A | 0.25 | 0.1429 | G |
| 5 | BICF2P420332           | 63118860 | C | 0    | 0      | A |
| 5 | BICF2P1130664          | 63126048 | G | 0.25 | 0.1429 | A |
| 5 | BICF2P181378           | 63136846 | A | 0    | 0      | C |
| 5 | BICF2P555702           | 63155494 | 0 | 0    | 0      | A |
| 5 | BICF2P505656           | 63162250 | A | 0    | 0      | G |
| 5 | BICF2P910269           | 63177558 | 0 | 0    | 0      | G |
| 5 | BICF2S23152601         | 63188144 | G | 0.75 | 0.8571 | A |
| 5 | BICF2P1342085          | 63200014 | A | 0    | 0      | G |
| 5 | BICF2S23757016         | 63210215 | A | 0.25 | 0.1429 | G |
| 5 | BICF2P621003           | 63221479 | A | 0    | 0      | T |
| 5 | BICF2S23731658         | 63230044 | A | 0.75 | 0.8571 | G |
| 5 | BICF2P1099792          | 63243480 | 0 | 0    | 0      | C |
| 5 | BICF2P184948           | 63281387 | A | 0    | 0      | G |
| 5 | BICF2P903729           | 63282534 | G | 0    | 0      | A |
| 5 | BICF2P664412           | 63287197 | G | 0.75 | 0.7857 | A |
| 5 | TIGRP2P73928_rs8675763 | 63297010 | 0 | 0    | 0      | G |
| 5 | BICF2S23116616         | 63309161 | 0 | 0    | 0      | G |
| 5 | BICF2S2451694          | 63320612 | A | 0    | 0      | G |
| 5 | TIGRP2P73930_rs8977458 | 63341459 | 0 | 0    | 0      | G |
| 5 | BICF2S23642687         | 63352591 | A | 0    | 0      | C |
| 5 | BICF2P364190           | 63374771 | 0 | 0    | 0      | A |
| 5 | BICF2P359197           | 63403005 | C | 0    | 0      | A |
| 5 | BICF2P538597           | 63411776 | A | 0    | 0      | G |
| 5 | BICF2P571085           | 63431677 | G | 0    | 0      | A |
| 5 | BICF2P646842           | 63435029 | A | 0.25 | 0.1429 | C |
| 5 | BICF2P1207574          | 63467286 | A | 0.25 | 0.2143 | G |
| 5 | BICF2P286234           | 63476571 | A | 0.5  | 0.6429 | G |
| 5 | BICF2P1870             | 63486165 | A | 0.25 | 0.2143 | G |
| 5 | BICF2P1191829          | 63492385 | 0 | 0    | 0      | A |
| 5 | BICF2P710738           | 63524164 | A | 0.5  | 0.6429 | T |
| 5 | BICF2P1002098          | 63537122 | A | 0    | 0      | G |
| 5 | BICF2P1181199          | 63544208 | A | 0.25 | 0.1429 | G |
| 5 | BICF2P116463           | 63549364 | A | 0.25 | 0.1429 | G |
| 5 | BICF2P890916           | 63568036 | C | 0    | 0      | G |
| 5 | BICF2S2334987          | 63573484 | A | 0    | 0      | G |
| 5 | BICF2P1238650          | 63585519 | G | 0.5  | 0.3571 | A |
| 5 | BICF2P459537           | 63604188 | C | 0.5  | 0.3571 | A |

|   |                        |          |   |      |        |   |
|---|------------------------|----------|---|------|--------|---|
| 5 | BICF2P590230           | 63616356 | G | 0.5  | 0.6429 | A |
| 5 | BICF2P1058413          | 63629122 | A | 0.5  | 0.3571 | C |
| 5 | BICF2P1077109          | 63633777 | 0 | 0    | 0      | G |
| 5 | BICF2P1264195          | 63649662 | A | 0.5  | 0.3571 | G |
| 5 | TIGRP2P73938_rs8652474 | 63658120 | 0 | 0    | 0      | A |
| 5 | BICF2P306915           | 63665707 | 0 | 0    | 0      | C |
| 5 | BICF2P988353           | 63676571 | 0 | 0    | 0      | G |
| 5 | BICF2P954835           | 63693463 | A | 0.5  | 0.6667 | G |
| 5 | BICF2P117500           | 63702773 | A | 0.5  | 0.6429 | G |
| 5 | BICF2P700435           | 63718972 | G | 0    | 0      | A |
| 5 | BICF2S23328017         | 63727644 | A | 0.75 | 0.7857 | G |
| 5 | BICF2S22941126         | 63736475 | A | 0.75 | 0.7857 | G |
| 5 | BICF2P1263414          | 63745775 | C | 0.75 | 0.7857 | A |
| 5 | BICF2P476733           | 63756253 | G | 0.25 | 0.2143 | A |
| 5 | BICF2P193794           | 63777135 | G | 0    | 0      | A |
| 5 | BICF2P1230869          | 63788259 | A | 0    | 0      | G |
| 5 | BICF2P1181614          | 63794303 | A | 0.25 | 0.2143 | G |
| 5 | BICF2P1259651          | 63795017 | A | 0    | 0.1429 | C |
| 5 | BICF2P255178           | 63817785 | A | 0.25 | 0.2143 | G |
| 5 | BICF2P575866           | 63822540 | A | 0.25 | 0.2143 | C |
| 5 | BICF2P984200           | 63828640 | A | 0.25 | 0.1429 | C |
| 5 | BICF2P210043           | 63853602 | A | 0.25 | 0.2143 | G |
| 5 | BICF2P749237           | 63855578 | G | 0.25 | 0.2143 | A |
| 5 | BICF2P891738           | 63860162 | A | 0.25 | 0.2143 | G |
| 5 | BICF2P105189           | 63873964 | A | 0.25 | 0.2143 | G |
| 5 | BICF2P753046           | 63885172 | A | 0.75 | 0.7857 | G |
| 5 | BICF2P1162252          | 63910385 | C | 0.25 | 0.1429 | A |
| 5 | TIGRP2P73940_rs8894040 | 63978994 | 0 | 0    | 0      | G |
| 5 | BICF2P159532           | 64024966 | 0 | 0    | 0      | A |
| 5 | BICF2S23616382         | 64035047 | G | 0.25 | 0.2143 | A |
| 5 | BICF2S23714189         | 64038300 | A | 0.5  | 0.3571 | C |
| 5 | BICF2S2329199          | 64044420 | A | 0.25 | 0.2143 | G |
| 5 | BICF2S22910865         | 64058057 | G | 0.25 | 0.2143 | A |
| 5 | BICF2S23512139         | 64069727 | G | 0.25 | 0.1429 | A |
| 5 | BICF2P459900           | 64082210 | 0 | 0    | 0      | A |
| 5 | BICF2P492346           | 64090595 | 0 | 0    | 0      | A |
| 5 | BICF2S23323363         | 64109520 | A | 0    | 0      | T |
| 5 | BICF2S23325358         | 64113324 | G | 0    | 0      | C |
| 5 | BICF2S23339468         | 64139010 | G | 0    | 0      | A |
| 5 | TIGRP2P73944_rs8855125 | 64154659 | 0 | 0    | 0      | C |
| 5 | BICF2S23418861         | 64162444 | G | 0.5  | 0.6429 | A |
| 5 | BICF2S24113320         | 64177818 | 0 | 0    | 0      | G |
| 5 | BICF2P1111296          | 64187315 | 0 | 0    | 0      | A |
| 5 | BICF2S23422048         | 64215092 | G | 0.75 | 0.8571 | A |
| 5 | BICF2S23054888         | 64225008 | G | 0.25 | 0.1429 | C |
| 5 | BICF2P131865           | 64248145 | 0 | 0    | 0      | A |
| 5 | BICF2S23729463         | 64261843 | G | 0.5  | 0.6667 | A |

|   |                        |          |   |      |        |   |
|---|------------------------|----------|---|------|--------|---|
| 5 | BICF2P789962           | 64262973 | G | 0    | 0      | A |
| 5 | BICF2P789964           | 64263475 | A | 0    | 0      | G |
| 5 | BICF2P393975           | 64273884 | 0 | 0    | 0      | T |
| 5 | BICF2P284102           | 64287286 | G | 0    | 0      | A |
| 5 | BICF2S23251601         | 64304532 | A | 0.75 | 0.8571 | G |
| 5 | BICF2P904869           | 64308018 | 0 | 0    | 0      | A |
| 5 | BICF2P1023180          | 64326385 | 0 | 0    | 0      | C |
| 5 | BICF2S23553838         | 64340765 | A | 0.5  | 0.3571 | G |
| 5 | BICF2S2358214          | 64347512 | A | 0    | 0      | G |
| 5 | BICF2P1298080          | 64366209 | A | 0    | 0      | G |
| 5 | BICF2S24116755         | 64387736 | G | 0    | 0      | A |
| 5 | BICF2P1344258          | 64405086 | C | 0    | 0      | G |
| 5 | BICF2P198413           | 64413174 | 0 | 0    | 0      | G |
| 5 | BICF2P872522           | 64438437 | 0 | 0    | 0      | G |
| 5 | TIGRP2P73951_rs8712216 | 64452060 | 0 | 0    | 0      | A |
| 5 | BICF2S23626885         | 64458416 | 0 | 0    | 0      | G |
| 5 | BICF2P228016           | 64480380 | 0 | 0    | 0      | G |
| 5 | BICF2P721056           | 64504388 | 0 | 0    | 0      | G |
| 5 | BICF2S23260404         | 64534918 | A | 0.75 | 0.7857 | C |
| 5 | BICF2P589653           | 64549832 | G | 0    | 0      | C |
| 5 | BICF2S24110385         | 64572153 | G | 0    | 0      | A |
| 5 | BICF2P1156229          | 64578516 | A | 0    | 0      | C |
| 5 | BICF2S23741020         | 64614327 | A | 0    | 0      | T |
| 5 | BICF2S23042158         | 64623207 | A | 0    | 0      | G |
| 5 | BICF2P585992           | 64637884 | G | 0.25 | 0.2143 | A |
| 5 | BICF2P828345           | 64671412 | A | 0    | 0      | C |
| 5 | BICF2P644972           | 64676488 | G | 0.25 | 0.2143 | A |
| 5 | BICF2S22920210         | 64698044 | G | 0    | 0      | A |
| 5 | BICF2P208716           | 64710056 | A | 0.5  | 0.6429 | G |
| 5 | BICF2P897153           | 64719235 | A | 0.5  | 0.3571 | G |
| 5 | BICF2P1019000          | 64725909 | G | 0    | 0      | A |
| 5 | BICF2P592562           | 64731967 | C | 0    | 0      | G |
| 5 | BICF2S23723037         | 64735144 | A | 0.5  | 0.3571 | G |
| 5 | TIGRP2P73955_rs9145818 | 64754756 | 0 | 0    | 0      | C |
| 5 | BICF2S2296202          | 64759902 | G | 0    | 0      | A |
| 5 | BICF2P837905           | 64772353 | A | 0    | 0      | G |
| 5 | BICF2P1167879          | 64785830 | G | 0    | 0      | A |
| 5 | BICF2S23540037         | 64793041 | G | 0    | 0      | A |
| 5 | BICF2P770743           | 64801713 | A | 0    | 0      | G |
| 5 | BICF2P280497           | 64810545 | A | 0    | 0      | G |
| 5 | BICF2P599131           | 64816044 | A | 0    | 0      | G |
| 5 | BICF2P1334164          | 64841941 | A | 0    | 0      | C |
| 5 | BICF2P583160           | 64850462 | A | 0    | 0      | G |
| 5 | BICF2P76253            | 64868684 | G | 0    | 0      | A |
| 5 | BICF2P885011           | 64872269 | 0 | 0    | 0      | C |
| 5 | BICF2P485524           | 64887855 | A | 0    | 0      | G |
| 5 | BICF2P77974            | 64906633 | A | 0    | 0      | G |

|   |                        |          |   |      |        |   |
|---|------------------------|----------|---|------|--------|---|
| 5 | BICF2P852606           | 64936309 | A | 0    | 0      | G |
| 5 | BICF2P959210           | 64947239 | A | 0    | 0      | G |
| 5 | BICF2P591961           | 64962283 | 0 | 0    | 0      | A |
| 5 | BICF2P1049057          | 64968325 | C | 0    | 0      | A |
| 5 | BICF2P1252891          | 64975201 | 0 | 0    | 0      | C |
| 5 | BICF2P1255647          | 65005563 | C | 0    | 0      | A |
| 5 | BICF2P602271           | 65017673 | 0 | 0    | 0      | A |
| 5 | BICF2P137180           | 65039318 | 0 | 0    | 0      | C |
| 5 | BICF2S23746657         | 65055122 | G | 0    | 0      | A |
| 5 | BICF2P798233           | 65058305 | A | 0    | 0      | G |
| 5 | BICF2P1159424          | 65079821 | C | 0    | 0      | A |
| 5 | BICF2P677921           | 65092233 | G | 0    | 0      | A |
| 5 | BICF2P559352           | 65112634 | A | 0    | 0      | G |
| 5 | BICF2P791429           | 65137373 | A | 0    | 0      | T |
| 5 | BICF2S23748722         | 65183488 | A | 0    | 0      | G |
| 5 | BICF2P901346           | 65201391 | 0 | 0    | 0      | G |
| 5 | BICF2S23425854         | 65209599 | C | 0.75 | 0.7857 | A |
| 5 | BICF2S22935060         | 65224353 | 0 | 0    | 0      | C |
| 5 | BICF2S23335310         | 65230874 | G | 0    | 0      | A |
| 5 | BICF2S23329871         | 65253957 | C | 0    | 0      | A |
| 5 | BICF2S23633732         | 65267999 | A | 0    | 0      | G |
| 5 | TIGRP2P73964_rs8805463 | 65300431 | C | 0    | 0      | A |
| 5 | BICF2P1055973          | 65314494 | G | 0.25 | 0.2143 | A |
| 5 | BICF2P1220990          | 65327351 | G | 0.25 | 0.1429 | A |
| 5 | BICF2P869348           | 65332305 | G | 0    | 0.1429 | A |
| 5 | BICF2S23652495         | 65354461 | A | 0    | 0      | G |
| 5 | BICF2P84750            | 65356597 | G | 0    | 0      | A |
| 5 | BICF2P794732           | 65374524 | A | 0.25 | 0.1429 | G |
| 5 | BICF2S23646717         | 65378221 | 0 | 0    | 0      | C |
| 5 | BICF2S2364368          | 65394827 | G | 0    | 0      | A |
| 5 | BICF2S23525384         | 65406128 | G | 0    | 0      | A |
| 5 | BICF2P1152604          | 65412097 | A | 0.75 | 0.7857 | C |
| 5 | BICF2P373505           | 65424843 | G | 0.25 | 0.2143 | A |
| 5 | BICF2P1145753          | 65436228 | A | 0.75 | 0.7857 | C |
| 5 | BICF2P294513           | 65453232 | 0 | 0    | 0      | A |
| 5 | BICF2P310097           | 65458859 | A | 0.75 | 0.7857 | G |
| 5 | BICF2P926490           | 65475238 | A | 0    | 0      | C |
| 5 | BICF2S23613434         | 65513339 | A | 0.25 | 0.2143 | C |
| 5 | BICF2P1324303          | 65516498 | 0 | 0    | 0      | G |
| 5 | BICF2S23121859         | 65543776 | G | 0.5  | 0.3571 | A |
| 5 | BICF2S23030250         | 65554791 | A | 0.25 | 0.1429 | G |
| 5 | BICF2S2298406          | 65572857 | A | 0.25 | 0.1429 | G |
| 5 | BICF2P590932           | 65580375 | A | 0    | 0      | C |
| 5 | BICF2P264665           | 65583805 | A | 0.5  | 0.6429 | G |
| 5 | BICF2P487417           | 65598717 | A | 0    | 0      | G |
| 5 | BICF2S23213370         | 65617952 | G | 0    | 0      | A |
| 5 | BICF2P726705           | 65626903 | C | 0    | 0      | A |

|   |                |          |   |      |        |   |
|---|----------------|----------|---|------|--------|---|
| 5 | BICF2P438923   | 65638159 | A | 0    | 0      | C |
| 5 | BICF2P566787   | 65642605 | G | 0    | 0      | A |
| 5 | BICF2P852277   | 65662615 | G | 0    | 0      | A |
| 5 | BICF2P199241   | 65667824 | A | 0.5  | 0.6429 | G |
| 5 | BICF2P775376   | 65678460 | G | 0.5  | 0.6429 | A |
| 5 | BICF2P263118   | 65690301 | A | 0    | 0      | G |
| 5 | BICF2P117484   | 65702013 | A | 0    | 0      | C |
| 5 | BICF2P1266081  | 65732067 | G | 0    | 0      | A |
| 5 | BICF2P885648   | 65740765 | G | 0    | 0      | A |
| 5 | BICF2S23658549 | 65750026 | A | 0.25 | 0.1429 | C |
| 5 | BICF2P339558   | 65768560 | G | 0    | 0      | A |
| 5 | BICF2P631236   | 65795145 | G | 0    | 0      | A |
| 5 | BICF2P950750   | 65813169 | T | 0    | 0      | A |
| 5 | BICF2P139786   | 65824772 | A | 0    | 0      | G |
| 5 | BICF2P4646     | 65826557 | A | 0    | 0      | C |
| 5 | BICF2P167471   | 65841311 | G | 0    | 0      | A |
| 5 | BICF2P875594   | 65856573 | A | 0    | 0      | C |
| 5 | BICF2P1326030  | 65868568 | A | 0.5  | 0.3571 | G |
| 5 | BICF2S23534689 | 65880179 | A | 0    | 0      | G |
| 5 | BICF2P227960   | 65883831 | A | 0    | 0      | G |
| 5 | BICF2P157295   | 65900638 | A | 0    | 0      | G |
| 5 | BICF2P889074   | 65906730 | G | 0    | 0      | C |
| 5 | BICF2P1345400  | 65923061 | G | 0.25 | 0.2143 | A |
| 5 | BICF2S23434355 | 65929595 | G | 0    | 0.2143 | A |
| 5 | BICF2P837417   | 65942280 | C | 0.25 | 0.2143 | A |
| 5 | BICF2P280982   | 65957407 | A | 0    | 0      | G |
| 5 | BICF2P999906   | 65976465 | A | 0    | 0      | T |
| 5 | BICF2S22937361 | 66019001 | G | 0    | 0      | A |
| 5 | BICF2P264790   | 66029693 | C | 0.25 | 0.2143 | G |
| 5 | BICF2P1147056  | 66038436 | G | 0    | 0      | C |
| 5 | BICF2S22921021 | 66051131 | A | 0.25 | 0.1429 | G |
| 5 | BICF2P1340443  | 66067189 | G | 0    | 0.1429 | A |
| 5 | BICF2S2336022  | 66068054 | A | 0.25 | 0.1429 | G |
| 5 | BICF2P662214   | 66072118 | A | 0.25 | 0.1429 | C |
| 5 | BICF2P662213   | 66072337 | A | 0.25 | 0.1429 | G |
| 5 | BICF2P590431   | 66086380 | A | 0    | 0      | G |
| 5 | BICF2P298506   | 66097097 | G | 0.75 | 0.7857 | A |
| 5 | BICF2P458734   | 66107767 | G | 0.5  | 0.6429 | A |
| 5 | BICF2P599460   | 66114778 | 0 | 0    | 0      | G |
| 5 | BICF2P987741   | 66133216 | A | 0.75 | 0.9167 | G |
| 5 | BICF2P137188   | 66143876 | G | 0    | 0      | A |
| 5 | BICF2P1359421  | 66157198 | G | 0    | 0      | A |
| 5 | BICF2P967379   | 66164077 | A | 0.75 | 0.8571 | C |
| 5 | BICF2P85291    | 66175256 | A | 0.5  | 0.6429 | G |
| 5 | BICF2P1195485  | 66191185 | C | 0    | 0      | A |
| 5 | BICF2P922937   | 66194465 | T | 0.5  | 0.6429 | A |
| 5 | BICF2P1040552  | 66222258 | G | 0.5  | 0.6429 | A |

|   |                |          |   |      |        |   |
|---|----------------|----------|---|------|--------|---|
| 5 | BICF2P1138616  | 66239640 | G | 0.5  | 0.6429 | A |
| 5 | BICF2S2327433  | 66261286 | A | 0    | 0      | G |
| 5 | BICF2P1122940  | 66265898 | G | 0    | 0      | A |
| 5 | BICF2P365667   | 66276959 | A | 0.5  | 0.6429 | G |
| 5 | BICF2P127478   | 66289020 | G | 0.5  | 0.6429 | A |
| 5 | BICF2P1410528  | 66297552 | A | 0    | 0      | G |
| 5 | BICF2P178795   | 66311263 | C | 0.5  | 0.6429 | A |
| 5 | BICF2S23219015 | 66323457 | A | 0    | 0      | G |
| 5 | BICF2S23740064 | 66362971 | 0 | 0    | 0      | A |
| 5 | BICF2P1027117  | 66366598 | C | 1    | 0.9167 | A |
| 5 | BICF2P1008770  | 66381245 | A | 0.25 | 0.1429 | G |
| 5 | BICF2P232151   | 66394771 | 0 | 0    | 0      | C |
| 5 | BICF2P808731   | 66404859 | C | 0.25 | 0.1429 | A |
| 5 | BICF2P173590   | 66423253 | G | 0    | 0      | A |
| 5 | BICF2P124088   | 66429400 | 0 | 0    | 0      | G |
| 5 | BICF2S23537042 | 66445530 | G | 0    | 0      | A |
| 5 | BICF2S23325812 | 66456986 | A | 0    | 0      | G |
| 5 | BICF2P945173   | 66465953 | A | 0.75 | 0.8571 | G |
| 5 | BICF2P731816   | 66488558 | G | 0.75 | 0.8571 | A |
| 5 | BICF2P244177   | 66489532 | T | 0.75 | 0.8571 | A |
| 5 | BICF2P857625   | 66496108 | G | 0.75 | 0.8571 | A |
| 5 | BICF2P1040066  | 66504537 | A | 0.75 | 0.8571 | G |
| 5 | BICF2P645336   | 66518848 | A | 0.25 | 0.2143 | G |
| 5 | BICF2P70559    | 66537234 | G | 0.75 | 0.8571 | A |
| 5 | BICF2P900214   | 66549569 | A | 0.25 | 0.2143 | G |
| 5 | BICF2S23425198 | 66559525 | G | 0    | 0      | A |
| 5 | BICF2S23019847 | 66571130 | A | 0.25 | 0.2143 | G |
| 5 | BICF2S2351224  | 66576208 | A | 0.25 | 0.2143 | G |
| 5 | BICF2P301683   | 66586052 | 0 | 0    | 0      | G |
| 5 | BICF2P153184   | 66598914 | A | 0    | 0      | G |
| 5 | BICF2P855794   | 66613665 | T | 0.25 | 0.2143 | A |
| 5 | BICF2P1288638  | 66620365 | A | 0.25 | 0.2143 | G |
| 5 | BICF2P1107834  | 66637742 | G | 0.25 | 0.2143 | A |
| 5 | BICF2S23444006 | 66639366 | G | 0    | 0      | A |
| 5 | BICF2S23426377 | 66653826 | A | 0    | 0      | G |
| 5 | BICF2S23624769 | 66664263 | A | 0    | 0      | G |
| 5 | BICF2P260580   | 66669052 | A | 0.5  | 0.3571 | C |
| 5 | BICF2P343766   | 66681390 | A | 0.25 | 0.1429 | G |
| 5 | BICF2P854025   | 66693084 | G | 0.75 | 0.7857 | A |
| 5 | BICF2P854028   | 66696051 | G | 0.5  | 0.6429 | C |
| 5 | BICF2P601502   | 66708382 | G | 0.5  | 0.3571 | A |
| 5 | BICF2P575049   | 66716173 | G | 0.5  | 0.3571 | A |
| 5 | BICF2P831934   | 66726828 | A | 0.5  | 0.6429 | G |
| 5 | BICF2P733518   | 66743328 | 0 | 0    | 0      | G |
| 5 | BICF2S23547384 | 66768255 | G | 0.5  | 0.6667 | A |
| 5 | BICF2P613327   | 66792280 | G | 0.5  | 0.6429 | A |
| 5 | BICF2S23244461 | 66812669 | A | 0.5  | 0.6429 | G |

|   |                |          |   |      |        |   |
|---|----------------|----------|---|------|--------|---|
| 5 | BICF2S23513441 | 66822663 | A | 0    | 0      | G |
| 5 | BICF2P817031   | 66829648 | G | 0.5  | 0.6429 | A |
| 5 | BICF2P865778   | 66840909 | G | 0.5  | 0.6429 | A |
| 5 | BICF2P242469   | 66851701 | A | 0.5  | 0.6429 | G |
| 5 | BICF2P906690   | 66863128 | A | 0.25 | 0.2143 | G |
| 5 | BICF2S23510884 | 66883190 | 0 | 0    | 0      | G |
| 5 | BICF2P1258819  | 66900853 | G | 0.25 | 0.2143 | A |
| 5 | BICF2P81075    | 66909003 | G | 0    | 0      | A |
| 5 | BICF2S22929501 | 66912576 | A | 0.75 | 0.7857 | G |
| 5 | BICF2P296029   | 66926250 | A | 0    | 0      | G |
| 5 | BICF2S23257208 | 66931215 | G | 0.5  | 0.6429 | A |
| 5 | BICF2P302437   | 66964140 | 0 | 0    | 0      | C |
| 5 | BICF2S22943205 | 66968865 | G | 0.5  | 0.3571 | A |
| 5 | BICF2P350901   | 66978687 | 0 | 0    | 0      | G |
| 5 | BICF2S22924625 | 66997931 | G | 0.5  | 0.3571 | A |
| 5 | BICF2P217318   | 67005003 | 0 | 0    | 0      | C |
| 5 | BICF2P631510   | 67022978 | A | 0    | 0      | G |
| 5 | BICF2P1497690  | 67043806 | G | 0    | 0      | A |
| 5 | BICF2P1352122  | 67062387 | A | 0.5  | 0.3571 | C |
| 5 | BICF2P569338   | 67068039 | C | 0    | 0      | A |
| 5 | BICF2P770287   | 67085884 | G | 0    | 0      | A |
| 5 | BICF2P770286   | 67087007 | A | 0    | 0      | G |
| 5 | BICF2P142110   | 67092365 | A | 0    | 0      | T |
| 5 | BICF2P114074   | 67116098 | G | 0    | 0      | A |
| 5 | BICF2P190824   | 67142519 | G | 0.5  | 0.6429 | A |
| 5 | BICF2P811405   | 67149640 | C | 0    | 0      | A |
| 5 | BICF2P501891   | 67172058 | A | 0.5  | 0.3571 | G |
| 5 | BICF2P501890   | 67172242 | A | 0    | 0      | G |
| 5 | BICF2P307030   | 67187803 | 0 | 0    | 0      | A |
| 5 | BICF2P1393784  | 67197981 | A | 0    | 0      | G |
| 5 | BICF2P1206786  | 67212249 | A | 0    | 0      | G |
| 5 | BICF2P931406   | 67215880 | G | 0.5  | 0.6667 | A |
| 5 | BICF2P779982   | 67222474 | 0 | 0    | 0      | G |
| 5 | BICF2P452033   | 67235346 | A | 0    | 0      | G |
| 5 | BICF2P126843   | 67260410 | C | 0.25 | 0.1429 | A |
| 5 | BICF2S23241657 | 67297616 | A | 0.5  | 0.6429 | G |
| 5 | BICF2P995400   | 67301293 | A | 0    | 0      | G |
| 5 | G354f36S28     | 67319384 | 0 | 0    | 0      | A |
| 5 | BICF2S23746792 | 67342420 | G | 0    | 0      | A |
| 5 | BICF2P582738   | 67351124 | A | 0    | 0      | G |
| 5 | BICF2S23764120 | 67356143 | C | 0    | 0      | A |
| 5 | BICF2S24116343 | 67401378 | 0 | 0    | 0      | C |
| 5 | BICF2S23252006 | 67402458 | A | 0.25 | 0.1429 | G |
| 5 | BICF2P383304   | 67437450 | 0 | 0    | 0      | G |
| 5 | BICF2P317290   | 67457321 | A | 0    | 0      | C |
| 5 | BICF2P838630   | 67461998 | A | 0.75 | 0.8571 | G |
| 5 | BICF2P95564    | 67497537 | 0 | 0    | 0      | G |

|   |                |          |   |      |        |   |
|---|----------------|----------|---|------|--------|---|
| 5 | BICF2P549906   | 67524019 | 0 | 0    | 0      | C |
| 5 | BICF2P689773   | 67549949 | A | 0    | 0      | G |
| 5 | BICF2S23045390 | 67552633 | A | 0.25 | 0.1429 | G |
| 5 | BICF2P1015480  | 67573954 | A | 0.25 | 0.1429 | G |
| 5 | BICF2P381779   | 67576960 | G | 0.75 | 0.7857 | A |
| 5 | BICF2P473103   | 67592407 | C | 0.5  | 0.3571 | G |
| 5 | BICF2P414351   | 67608137 | A | 0.5  | 0.6429 | G |
| 5 | BICF2P236614   | 67611755 | A | 0.5  | 0.6429 | G |
| 5 | BICF2P391963   | 67627875 | G | 0    | 0      | A |
| 5 | BICF2P721420   | 67652615 | A | 0.5  | 0.3571 | G |
| 5 | BICF2S23123672 | 67659259 | A | 0.25 | 0.1429 | G |
| 5 | BICF2P402395   | 67663263 | G | 0.5  | 0.3571 | A |
| 5 | BICF2S23421788 | 67668216 | A | 0.5  | 0.3571 | G |
| 5 | BICF2P95307    | 67678182 | 0 | 0    | 0      | G |
| 5 | BICF2P279427   | 67707081 | 0 | 0    | 0      | G |
| 5 | BICF2S23435618 | 67713262 | A | 0.25 | 0.2143 | G |
| 5 | BICF2P772074   | 67732568 | C | 0.25 | 0.1429 | A |
| 5 | BICF2P973352   | 67737551 | C | 0.25 | 0.1429 | A |
| 5 | BICF2S24113801 | 67740450 | G | 0.25 | 0.2143 | A |
| 5 | BICF2S22935158 | 67751339 | A | 0.5  | 0.6429 | G |
| 5 | BICF2P483155   | 67752477 | A | 0.5  | 0.6429 | G |
| 5 | BICF2P1316251  | 67767329 | A | 0.25 | 0.1429 | G |
| 5 | BICF2P965647   | 67775316 | A | 0    | 0      | G |
| 5 | BICF2P377442   | 67791922 | A | 0    | 0      | G |
| 5 | BICF2P512317   | 67793983 | G | 0.25 | 0.1429 | A |
| 5 | BICF2P512316   | 67794062 | A | 0    | 0      | G |
| 5 | BICF2P597885   | 67801380 | A | 0.25 | 0.1429 | G |
| 5 | BICF2P848956   | 67821641 | 0 | 0    | 0      | G |
| 5 | BICF2S23046523 | 67832703 | G | 0    | 0      | A |
| 5 | BICF2P940599   | 67839436 | 0 | 0    | 0      | G |
| 5 | BICF2P1387272  | 67855671 | 0 | 0    | 0      | G |
| 5 | BICF2P1295354  | 67867186 | A | 0    | 0      | C |
| 5 | BICF2P1007652  | 67883709 | G | 0    | 0      | A |
| 5 | BICF2S23740895 | 67912410 | A | 0.25 | 0.2143 | G |
| 5 | BICF2S2331458  | 67919382 | G | 0    | 0      | A |
| 5 | BICF2P577927   | 67952631 | C | 0    | 0      | G |
| 5 | BICF2P577930   | 67955195 | G | 0    | 0      | A |
| 5 | BICF2P370655   | 67986806 | G | 0    | 0      | A |
| 5 | BICF2P1355548  | 67991138 | A | 0    | 0      | G |
| 5 | BICF2P1175699  | 68004480 | A | 0    | 0      | G |
| 5 | BICF2P742360   | 68009762 | A | 0    | 0      | G |
| 5 | BICF2P388881   | 68020259 | C | 0    | 0      | A |
| 5 | BICF2S22942411 | 68022531 | A | 0    | 0      | C |
| 5 | BICF2S23131499 | 68044654 | G | 0    | 0      | A |
| 5 | BICF2P416487   | 68063545 | A | 0    | 0      | G |
| 5 | BICF2S22918688 | 68071732 | G | 0    | 0      | A |
| 5 | BICF2P796488   | 68087057 | C | 0    | 0      | A |



|   |                        |          |   |      |         |   |
|---|------------------------|----------|---|------|---------|---|
| 5 | BICF2P145786           | 68100867 | A | 0.25 | 0.08333 | G |
| 5 | BICF2P195922           | 68107472 | G | 0.25 | 0.1429  | C |
| 5 | BICF2P1175409          | 68116090 | A | 0.5  | 0.6429  | G |
| 5 | BICF2P1425515          | 68132369 | G | 0.5  | 0.6429  | A |
| 5 | BICF2P226937           | 68139713 | A | 0    | 0       | G |
| 5 | BICF2P1181570          | 68156340 | G | 0.5  | 0.3571  | A |
| 5 | BICF2P1269609          | 68167614 | G | 0.25 | 0.1429  | A |
| 5 | BICF2P296647           | 68182815 | A | 0.5  | 0.6429  | G |
| 5 | BICF2P519303           | 68188297 | G | 0.5  | 0.6429  | A |
| 5 | BICF2P1218410          | 68192123 | A | 0.5  | 0.3571  | G |
| 5 | BICF2P882024           | 68196577 | A | 0.5  | 0.6429  | G |
| 5 | BICF2P1100899          | 68200396 | A | 0.5  | 0.6429  | G |
| 5 | BICF2S23745026         | 68213962 | A | 0.5  | 0.3571  | G |
| 5 | BICF2S23711828         | 68218539 | A | 0.5  | 0.3571  | T |
| 5 | BICF2P616884           | 68230836 | 0 | 0    | 0       | G |
| 5 | BICF2P1193120          | 68245518 | 0 | 0    | 0       | G |
| 5 | BICF2S23344809         | 68252769 | A | 0.5  | 0.3571  | G |
| 5 | BICF2P1225165          | 68267532 | A | 0.25 | 0.1429  | G |
| 5 | BICF2S23532143         | 68277744 | C | 0.5  | 0.3333  | A |
| 5 | BICF2S2323030          | 68287996 | C | 0.25 | 0.2143  | G |
| 5 | BICF2P905700           | 68303296 | G | 0.5  | 0.3571  | A |
| 5 | BICF2P24608            | 68314479 | A | 0.25 | 0.2143  | G |
| 5 | BICF2P1270212          | 68327176 | A | 0.75 | 0.8571  | G |
| 5 | BICF2P103450           | 68343893 | A | 0.25 | 0.2143  | G |
| 5 | BICF2S237233           | 68349540 | A | 0    | 0       | G |
| 5 | BICF2P416896           | 68363809 | G | 0.25 | 0.2143  | C |
| 5 | BICF2S23219168         | 68372044 | A | 0.25 | 0.2143  | G |
| 5 | BICF2P552323           | 68393959 | A | 0.25 | 0.2143  | G |
| 5 | BICF2S23436293         | 68410197 | C | 0    | 0       | A |
| 5 | BICF2S23322721         | 68435244 | C | 0    | 0       | A |
| 5 | BICF2P94251            | 68436876 | G | 0    | 0       | A |
| 5 | BICF2P515777           | 68451424 | G | 0    | 0       | A |
| 5 | BICF2P56458            | 68466653 | A | 0    | 0       | T |
| 5 | BICF2P542776           | 68481853 | G | 0.5  | 0.3571  | A |
| 5 | TIGRP2P74042_rs9021762 | 68482973 | 0 | 0    | 0       | C |
| 5 | BICF2S23159097         | 68496148 | G | 0.5  | 0.6429  | A |
| 5 | BICF2P932869           | 68508811 | A | 0    | 0       | C |
| 5 | BICF2P804974           | 68520814 | G | 1    | 1       | A |
| 5 | BICF2P847619           | 68532753 | A | 0    | 0       | G |
| 5 | BICF2P394707           | 68543290 | C | 1    | 1       | A |
| 5 | BICF2P394706           | 68543610 | C | 1    | 1       | A |
| 5 | BICF2P1275219          | 68546633 | A | 0    | 0       | G |
| 5 | BICF2P71168            | 68555799 | G | 0.75 | 0.8571  | A |
| 5 | BICF2P572765           | 68558161 | A | 0.75 | 0.8571  | G |
| 5 | BICF2S23530493         | 68564524 | A | 0    | 0       | G |
| 5 | BICF2P995532           | 68580063 | A | 0.5  | 0.3571  | G |
| 5 | BICF2P258200           | 68588263 | G | 0.25 | 0.1429  | A |

|   |                        |          |   |      |         |   |
|---|------------------------|----------|---|------|---------|---|
| 5 | BICF2P1400616          | 68597937 | A | 0.75 | 0.7857  | G |
| 5 | BICF2P1394996          | 68615039 | A | 0    | 0       | G |
| 5 | BICF2P989786           | 68630173 | G | 0.5  | 0.3571  | A |
| 5 | BICF2P651730           | 68637766 | A | 0    | 0       | G |
| 5 | BICF2P772897           | 68650812 | G | 0    | 0       | A |
| 5 | BICF2P1230450          | 68663691 | A | 0    | 0       | G |
| 5 | BICF2P245940           | 68673405 | A | 0    | 0       | C |
| 5 | BICF2P699705           | 68699362 | A | 0.25 | 0.2143  | G |
| 5 | BICF2P991235           | 68774140 | A | 0    | 0       | G |
| 5 | BICF2P630232           | 68785060 | A | 0    | 0       | G |
| 5 | BICF2P992773           | 68793022 | A | 0    | 0       | G |
| 5 | BICF2P216142           | 68816354 | G | 0.25 | 0.1667  | A |
| 5 | BICF2P1078243          | 68835481 | 0 | 0    | 0       | G |
| 5 | BICF2P269901           | 68849706 | A | 0.25 | 0.2143  | G |
| 5 | BICF2P178168           | 68857367 | A | 0    | 0       | C |
| 5 | BICF2P126196           | 68862535 | A | 0.25 | 0.2143  | C |
| 5 | BICF2S23444281         | 68864953 | A | 0    | 0       | C |
| 5 | BICF2P1003979          | 68866198 | A | 0.75 | 0.7857  | G |
| 5 | BICF2S23730537         | 68881020 | C | 1    | 1       | G |
| 5 | BICF2S23520424         | 68892417 | A | 0    | 0       | G |
| 5 | BICF2P89833            | 68898234 | C | 0.25 | 0.08333 | A |
| 5 | BICF2P937925           | 68910417 | C | 0.5  | 0.3571  | A |
| 5 | BICF2S23528026         | 68927781 | T | 0.5  | 0.6667  | A |
| 5 | BICF2P1240934          | 68931194 | A | 0.25 | 0.2143  | G |
| 5 | BICF2S23732438         | 68942719 | A | 0.5  | 0.3571  | G |
| 5 | BICF2P486648           | 68957677 | G | 0.75 | 0.9167  | A |
| 5 | BICF2S23433094         | 68966704 | T | 0.75 | 0.8571  | A |
| 5 | BICF2S22947805         | 68977147 | A | 0    | 0       | C |
| 5 | BICF2P616723           | 68995000 | G | 0.75 | 0.7857  | A |
| 5 | BICF2P1254407          | 69032645 | 0 | 0    | 0       | A |
| 5 | BICF2S23030455         | 69070220 | G | 0    | 0       | A |
| 5 | BICF2P223987           | 69076323 | A | 0    | 0       | G |
| 5 | BICF2S23660314         | 69084953 | G | 0    | 0       | A |
| 5 | TIGRP2P74058_rs9206877 | 69095815 | 0 | 0    | 0       | C |
| 5 | BICF2S23210717         | 69108099 | A | 0.25 | 0.1429  | G |
| 5 | BICF2P481578           | 69136132 | 0 | 0    | 0       | G |
| 5 | BICF2P894795           | 69203988 | A | 0    | 0       | G |
| 5 | BICF2P891928           | 69215731 | A | 0    | 0       | G |
| 5 | BICF2P1191301          | 69237278 | A | 0    | 0       | G |
| 5 | BICF2P783831           | 69245474 | 0 | 0    | 0       | G |
| 5 | BICF2P1436951          | 69255084 | G | 1    | 1       | A |
| 5 | BICF2S22933109         | 69269475 | G | 0    | 0       | A |
| 5 | BICF2P54597            | 69277174 | A | 1    | 1       | G |
| 5 | BICF2P687902           | 69291059 | A | 0    | 0       | G |
| 5 | BICF2P962301           | 69304382 | A | 0    | 0       | G |
| 5 | BICF2S23154273         | 69306623 | A | 0    | 0       | G |
| 5 | BICF2G63083146         | 69318755 | A | 0    | 0       | G |

|   |                        |          |   |      |        |   |
|---|------------------------|----------|---|------|--------|---|
| 5 | BICF2G63083150         | 69322577 | A | 0    | 0      | G |
| 5 | BICF2G63083170         | 69334604 | A | 1    | 1      | G |
| 5 | BICF2P590826           | 69351798 | G | 0    | 0      | A |
| 5 | BICF2G63083204         | 69365912 | A | 0    | 0      | G |
| 5 | BICF2G63083262         | 69413843 | G | 0    | 0      | A |
| 5 | BICF2G63083279         | 69426966 | 0 | 0    | 0      | A |
| 5 | BICF2P938698           | 69438492 | 0 | 0    | 0      | C |
| 5 | BICF2S2363313          | 69468831 | G | 0    | 0      | A |
| 5 | BICF2P1215452          | 69512795 | A | 0    | 0      | G |
| 5 | BICF2G630242634        | 69532100 | A | 0.25 | 0.2143 | C |
| 5 | BICF2G630242607        | 69542273 | G | 0.75 | 0.7857 | A |
| 5 | BICF2P1070301          | 69552518 | A | 0    | 0      | T |
| 5 | BICF2P1070294          | 69553015 | A | 0    | 0      | G |
| 5 | BICF2G630242586        | 69564102 | A | 1    | 1      | G |
| 5 | BICF2G630242568        | 69578735 | A | 0.25 | 0.2143 | G |
| 5 | BICF2G630242564        | 69596522 | A | 0    | 0      | C |
| 5 | BICF2G630242563        | 69603343 | G | 1    | 1      | A |
| 5 | BICF2G630242560        | 69609721 | C | 0    | 0      | A |
| 5 | BICF2G630242545        | 69632081 | A | 0.25 | 0.2143 | C |
| 5 | BICF2S23642280         | 69634558 | G | 0    | 0      | A |
| 5 | BICF2G630242521        | 69648780 | G | 0    | 0      | A |
| 5 | BICF2P351043           | 69663291 | A | 0.25 | 0.2143 | G |
| 5 | BICF2G630242486        | 69675017 | A | 0    | 0      | G |
| 5 | BICF2G630242477        | 69684936 | A | 0    | 0      | G |
| 5 | BICF2G630242475        | 69685016 | A | 0    | 0      | G |
| 5 | BICF2P1194497          | 69693172 | A | 1    | 1      | G |
| 5 | BICF2G630242432        | 69705615 | G | 1    | 1      | A |
| 5 | BICF2G630242387        | 69721784 | 0 | 0    | 0      | G |
| 5 | BICF2G630242353        | 69730551 | C | 0    | 0      | G |
| 5 | BICF2G630242342        | 69735342 | A | 0    | 0      | G |
| 5 | BICF2P1404031          | 69763906 | A | 0.25 | 0.2143 | G |
| 5 | TIGRP2P74069_rs9141074 | 69772365 | 0 | 0    | 0      | T |
| 5 | BICF2G630242321        | 69793062 | A | 0    | 0      | G |
| 5 | BICF2P788523           | 69806382 | G | 0    | 0      | A |
| 5 | BICF2S23333761         | 69879641 | A | 0.75 | 0.7857 | G |
| 5 | BICF2G630242237        | 69888456 | 0 | 0    | 0      | G |
| 5 | BICF2G630242223        | 69897534 | A | 0.75 | 0.8333 | G |
| 5 | BICF2G630242211        | 69912932 | G | 0    | 0      | A |
| 5 | TIGRP2P74071_rs8877866 | 69921302 | 0 | 0    | 0      | C |
| 5 | BICF2P1082888          | 69941485 | A | 0    | 0      | G |
| 5 | BICF2G630242196        | 69946103 | A | 0    | 0      | G |
| 5 | BICF2S23210169         | 69958686 | G | 0.25 | 0.2143 | A |
| 5 | BICF2G630242180        | 69969778 | G | 0.75 | 0.7857 | A |
| 5 | BICF2G630242175        | 69980476 | 0 | 0    | 0      | G |
| 5 | BICF2G630242167        | 69995168 | A | 0    | 0      | G |
| 5 | BICF2G630242159        | 70006166 | A | 0.25 | 0.2143 | G |
| 5 | BICF2P1086234          | 70019083 | A | 0.75 | 0.7857 | G |

|   |                        |          |   |      |        |   |
|---|------------------------|----------|---|------|--------|---|
| 5 | BICF2G630242119        | 70031708 | A | 0    | 0      | G |
| 5 | BICF2G630242095        | 70043414 | A | 0    | 0      | G |
| 5 | BICF2P205133           | 70050871 | G | 0.25 | 0.2143 | A |
| 5 | BICF2P1316906          | 70069136 | G | 0    | 0      | A |
| 5 | BICF2G630242089        | 70079099 | A | 0    | 0      | G |
| 5 | BICF2S22922527         | 70087091 | A | 1    | 1      | G |
| 5 | BICF2P108567           | 70105365 | 0 | 0    | 0      | C |
| 5 | BICF2G630242072        | 70131616 | A | 0    | 0      | C |
| 5 | BICF2G630242045        | 70156735 | A | 0    | 0      | G |
| 5 | BICF2G630242040        | 70161991 | G | 0    | 0      | A |
| 5 | BICF2G630242017        | 70176438 | A | 0    | 0      | G |
| 5 | BICF2G630242012        | 70186030 | A | 0    | 0      | G |
| 5 | BICF2G630241995        | 70200989 | 0 | 0    | 0      | G |
| 5 | BICF2G630241993        | 70212750 | A | 1    | 1      | G |
| 5 | BICF2G630241963        | 70235881 | A | 0    | 0      | C |
| 5 | BICF2P1416176          | 70248344 | 0 | 0    | 0      | G |
| 5 | BICF2P712007           | 70254402 | G | 0    | 0      | C |
| 5 | BICF2G630241926        | 70255665 | A | 0    | 0      | G |
| 5 | BICF2P655600           | 70267386 | A | 0    | 0      | G |
| 5 | BICF2P1121745          | 70277970 | A | 0.25 | 0.2143 | G |
| 5 | BICF2P158937           | 70279275 | A | 0.25 | 0.1667 | G |
| 5 | BICF2G630241895        | 70289733 | A | 0    | 0      | G |
| 5 | BICF2G630241884        | 70304014 | 0 | 0    | 0      | G |
| 5 | BICF2P1456251          | 70315073 | 0 | 0    | 0      | A |
| 5 | BICF2S2443239          | 70332612 | A | 0    | 0      | G |
| 5 | BICF2P1079771          | 70335830 | 0 | 0    | 0      | A |
| 5 | BICF2P1317221          | 70347104 | A | 0.75 | 0.7857 | G |
| 5 | BICF2G630241882        | 70358833 | G | 0.25 | 0.2143 | A |
| 5 | BICF2G630241879        | 70376098 | G | 0    | 0      | A |
| 5 | BICF2G630241874        | 70381756 | C | 0    | 0      | A |
| 5 | BICF2G630241850        | 70395337 | A | 0    | 0      | C |
| 5 | BICF2G630241832        | 70410515 | G | 0    | 0      | A |
| 5 | BICF2S23638002         | 70425953 | A | 1    | 1      | G |
| 5 | BICF2G630241824        | 70427145 | G | 1    | 1      | C |
| 5 | BICF2P69983            | 70443908 | A | 1    | 1      | G |
| 5 | BICF2P173096           | 70461120 | A | 0    | 0      | C |
| 5 | BICF2P78736            | 70478483 | A | 0    | 0      | G |
| 5 | BICF2P1313120          | 70488868 | 0 | 0    | 0      | A |
| 5 | BICF2P1244340          | 70504339 | 0 | 0    | 0      | G |
| 5 | BICF2P851960           | 70545426 | 0 | 0    | 0      | A |
| 5 | BICF2P304947           | 70569141 | 0 | 0    | 0      | A |
| 5 | BICF2P1137673          | 70618033 | G | 0    | 0      | A |
| 5 | BICF2G630241796        | 70632470 | A | 0    | 0      | G |
| 5 | TIGRP2P74085_rs8576204 | 70639852 | 0 | 0    | 0      | G |
| 5 | BICF2G630241779        | 70649120 | A | 1    | 1      | G |
| 5 | BICF2G630241742        | 70659804 | G | 1    | 1      | A |
| 5 | BICF2G630241723        | 70673418 | G | 0    | 0      | C |

|   |                 |          |   |   |   |   |
|---|-----------------|----------|---|---|---|---|
| 5 | BICF2G630241709 | 70684629 | 0 | 0 | 0 | G |
| 5 | BICF2G630241705 | 70694436 | G | 0 | 0 | A |
| 5 | BICF2G630241695 | 70702648 | A | 1 | 1 | G |
| 5 | BICF2G630241673 | 70719755 | 0 | 0 | 0 | C |
| 5 | BICF2G630241659 | 70732713 | G | 0 | 0 | A |
| 5 | BICF2P1203151   | 70743819 | A | 0 | 0 | G |
| 5 | BICF2G630241647 | 70749900 | C | 1 | 1 | A |
| 5 | BICF2G630241643 | 70763995 | A | 0 | 0 | G |
| 5 | BICF2G630241631 | 70778326 | 0 | 0 | 0 | A |
| 5 | BICF2P339031    | 70782938 | A | 1 | 1 | G |
| 5 | BICF2G630241626 | 70785876 | G | 1 | 1 | A |
| 5 | BICF2G630241609 | 70807935 | 0 | 0 | 0 | A |
| 5 | BICF2G630241608 | 70828986 | G | 0 | 0 | A |
| 5 | BICF2G630241596 | 70840837 | A | 0 | 0 | G |
| 5 | BICF2S23542472  | 70861378 | A | 0 | 0 | G |
| 5 | BICF2G630241586 | 70894032 | A | 0 | 0 | G |
| 5 | BICF2G630241579 | 70901696 | A | 0 | 0 | G |
| 5 | BICF2G630241561 | 70911384 | G | 0 | 0 | A |
| 5 | BICF2G630241559 | 70912302 | A | 0 | 0 | G |
| 5 | BICF2G630241531 | 70921247 | G | 0 | 0 | A |
| 5 | BICF2G630241518 | 70937238 | A | 1 | 1 | G |
| 5 | BICF2G630241511 | 70946189 | A | 0 | 0 | G |
| 5 | BICF2P859461    | 70962625 | A | 0 | 0 | G |
| 5 | BICF2G630241472 | 70974384 | G | 1 | 1 | A |
| 5 | BICF2G630241436 | 70988904 | A | 0 | 0 | G |
| 5 | BICF2G630241419 | 70995182 | C | 1 | 1 | A |
| 5 | BICF2G630241395 | 71001816 | G | 0 | 0 | A |
| 5 | BICF2G630241393 | 71002044 | G | 0 | 0 | A |
| 5 | BICF2G630241343 | 71014465 | A | 0 | 0 | G |
| 5 | BICF2G630241308 | 71025645 | A | 0 | 0 | G |
| 5 | BICF2G630241274 | 71045251 | C | 0 | 0 | A |
| 5 | BICF2G630241272 | 71047816 | G | 1 | 1 | A |
| 5 | BICF2G630241268 | 71051791 | G | 1 | 1 | A |
| 5 | BICF2G630241250 | 71064832 | A | 0 | 0 | G |
| 5 | BICF2G630241243 | 71071472 | G | 0 | 0 | A |
| 5 | BICF2G630241216 | 71092552 | G | 0 | 0 | C |
| 5 | BICF2G630241201 | 71098537 | A | 0 | 0 | G |
| 5 | BICF2G630241187 | 71105309 | A | 0 | 0 | G |
| 5 | BICF2P2846      | 71114870 | A | 1 | 1 | G |
| 5 | BICF2S2357716   | 71132085 | G | 0 | 0 | A |
| 5 | BICF2P836205    | 71137031 | G | 0 | 0 | A |
| 5 | BICF2P1224497   | 71157114 | G | 0 | 0 | A |
| 5 | BICF2P1297229   | 71167003 | A | 1 | 1 | G |
| 5 | BICF2G630241089 | 71180977 | A | 0 | 0 | G |
| 5 | BICF2G630241077 | 71192310 | A | 0 | 0 | G |
| 5 | BICF2G630241040 | 71211852 | A | 0 | 0 | G |
| 5 | BICF2G630241031 | 71224193 | A | 0 | 0 | G |

|   |                        |          |   |   |   |   |
|---|------------------------|----------|---|---|---|---|
| 5 | BICF2G630241008        | 71239919 | A | 0 | 0 | G |
| 5 | BICF2G630240970        | 71281645 | A | 0 | 0 | C |
| 5 | BICF2G630240954        | 71289201 | G | 0 | 0 | A |
| 5 | BICF2G630240922        | 71311210 | A | 1 | 1 | G |
| 5 | BICF2S23317800         | 71323937 | A | 0 | 0 | G |
| 5 | BICF2G630240912        | 71337310 | A | 0 | 0 | G |
| 5 | BICF2G630240909        | 71352216 | A | 0 | 0 | G |
| 5 | BICF2G630240897        | 71363104 | A | 0 | 0 | G |
| 5 | BICF2G630240872        | 71379229 | A | 0 | 0 | G |
| 5 | BICF2S23033755         | 71386889 | A | 1 | 1 | G |
| 5 | BICF2G630240867        | 71395332 | A | 0 | 0 | G |
| 5 | BICF2P1296033          | 71404616 | A | 0 | 0 | G |
| 5 | BICF2G630240851        | 71417317 | G | 0 | 0 | C |
| 5 | BICF2S23045788         | 71437880 | A | 1 | 1 | G |
| 5 | BICF2G630240845        | 71439654 | A | 0 | 0 | T |
| 5 | BICF2G630240835        | 71455365 | A | 0 | 0 | G |
| 5 | BICF2G630240820        | 71468560 | A | 0 | 0 | G |
| 5 | BICF2S2323475          | 71477084 | C | 0 | 0 | A |
| 5 | BICF2G630240812        | 71489926 | G | 1 | 1 | A |
| 5 | BICF2G630240803        | 71497178 | G | 1 | 1 | A |
| 5 | BICF2P719146           | 71521509 | G | 1 | 1 | A |
| 5 | TIGRP2P74102_rs8812146 | 71545960 | 0 | 0 | 0 | G |
| 5 | BICF2G630240757        | 71554439 | A | 0 | 0 | G |
| 5 | BICF2G630240744        | 71564656 | A | 1 | 1 | G |
| 5 | BICF2P407857           | 71577238 | 0 | 0 | 0 | G |
| 5 | BICF2P1130435          | 71604605 | G | 0 | 0 | C |
| 5 | BICF2G630240741        | 71615495 | A | 0 | 0 | G |
| 5 | BICF2G630240740        | 71625117 | C | 1 | 1 | A |
| 5 | BICF2P763446           | 71637761 | A | 0 | 0 | G |
| 5 | BICF2P540963           | 71647797 | A | 0 | 0 | G |
| 5 | BICF2S2338428          | 71674323 | G | 0 | 0 | A |
| 5 | BICF2G630240730        | 71679900 | A | 0 | 0 | G |
| 5 | BICF2P1198706          | 71699719 | 0 | 0 | 0 | G |
| 5 | BICF2G630240727        | 71711226 | A | 0 | 0 | G |
| 5 | BICF2S23254404         | 71723750 | G | 0 | 0 | A |
| 5 | BICF2G630240718        | 71729849 | C | 1 | 1 | G |
| 5 | BICF2G630240714        | 71738675 | G | 0 | 0 | A |
| 5 | TIGRP2P74109_rs8779164 | 71762722 | 0 | 0 | 0 | A |
| 5 | BICF2G630240688        | 71777290 | A | 0 | 0 | G |
| 5 | BICF2G630240674        | 71785567 | A | 0 | 0 | C |
| 5 | BICF2G630240665        | 71801145 | G | 0 | 0 | A |
| 5 | BICF2G630240654        | 71807186 | A | 0 | 0 | C |
| 5 | BICF2P1096540          | 71820505 | G | 0 | 0 | A |
| 5 | BICF2G630240621        | 71833727 | G | 0 | 0 | A |
| 5 | BICF2G630240612        | 71840561 | C | 0 | 0 | A |
| 5 | BICF2G630240583        | 71865105 | A | 1 | 1 | G |
| 5 | BICF2P262001           | 71876626 | A | 0 | 0 | G |

|   |                 |          |   |   |   |   |
|---|-----------------|----------|---|---|---|---|
| 5 | BICF2P827128    | 71881868 | A | 0 | 0 | G |
| 5 | BICF2P637002    | 71884918 | G | 0 | 0 | A |
| 5 | BICF2G630240524 | 71900303 | G | 0 | 0 | A |
| 5 | BICF2G630240486 | 71919892 | A | 0 | 0 | C |
| 5 | BICF2G630240481 | 71923108 | G | 0 | 0 | A |
| 5 | BICF2G630240463 | 71941670 | G | 0 | 0 | A |
| 5 | BICF2S22914258  | 71957903 | A | 0 | 0 | G |
| 5 | BICF2G630240434 | 71970285 | C | 0 | 0 | G |
| 5 | BICF2G630240420 | 71980370 | G | 0 | 0 | A |
| 5 | BICF2G630240398 | 71993850 | C | 0 | 0 | A |
| 5 | BICF2G630240391 | 71999836 | A | 0 | 0 | G |
| 5 | BICF2G630240383 | 72003307 | A | 0 | 0 | G |
| 5 | BICF2G630240356 | 72025848 | G | 1 | 1 | C |
| 5 | BICF2S22918836  | 72026056 | A | 0 | 0 | C |
| 5 | BICF2G630240328 | 72037218 | G | 0 | 0 | A |
| 5 | BICF2G630240303 | 72053121 | A | 0 | 0 | G |
| 5 | BICF2G630240278 | 72072533 | A | 0 | 0 | G |
| 5 | BICF2G630240265 | 72084740 | G | 0 | 0 | A |
| 5 | BICF2G630240249 | 72093926 | C | 0 | 0 | A |
| 5 | BICF2G630240235 | 72105104 | C | 0 | 0 | A |
| 5 | BICF2P472865    | 72120128 | G | 1 | 1 | A |
| 5 | BICF2P363265    | 72133520 | C | 0 | 0 | G |
| 5 | BICF2G630240203 | 72164485 | A | 0 | 0 | G |
| 5 | BICF2G630240171 | 72171092 | G | 0 | 0 | A |
| 5 | BICF2P1361702   | 72177047 | A | 0 | 0 | G |
| 5 | BICF2P1462323   | 72255904 | G | 0 | 0 | A |
| 5 | BICF2G630240149 | 72266887 | A | 0 | 0 | G |
| 5 | BICF2P159123    | 72288489 | G | 0 | 0 | A |
| 5 | BICF2S2345833   | 72311492 | A | 0 | 0 | C |
| 5 | BICF2G630240133 | 72315642 | A | 0 | 0 | G |
| 5 | BICF2G630240128 | 72333059 | G | 0 | 0 | A |
| 5 | BICF2G630240118 | 72337792 | A | 0 | 0 | G |
| 5 | BICF2P644863    | 72349173 | A | 0 | 0 | G |
| 5 | BICF2G630240057 | 72364478 | A | 1 | 1 | G |
| 5 | BICF2P1118980   | 72372253 | G | 0 | 0 | A |
| 5 | BICF2S2299438   | 72382944 | A | 1 | 1 | C |
| 5 | BICF2G630240049 | 72402769 | G | 1 | 1 | A |
| 5 | BICF2G630240048 | 72405063 | C | 0 | 0 | A |
| 5 | BICF2G630240025 | 72418578 | G | 0 | 0 | A |
| 5 | BICF2G630240000 | 72433090 | A | 0 | 0 | G |
| 5 | BICF2G630239994 | 72440696 | G | 0 | 0 | A |
| 5 | BICF2G630239973 | 72451687 | G | 0 | 0 | A |
| 5 | BICF2G630239952 | 72463717 | C | 1 | 1 | A |
| 5 | BICF2G630239936 | 72473429 | A | 1 | 1 | G |
| 5 | BICF2G630239899 | 72498035 | G | 0 | 0 | A |
| 5 | BICF2G630239892 | 72504691 | G | 0 | 0 | A |
| 5 | BICF2G630239888 | 72515660 | A | 0 | 0 | C |

|   |                        |          |   |   |   |   |
|---|------------------------|----------|---|---|---|---|
| 5 | BICF2P781770           | 72519278 | C | 0 | 0 | A |
| 5 | BICF2G630239876        | 72532335 | A | 0 | 0 | G |
| 5 | BICF2G630239862        | 72536241 | A | 0 | 0 | G |
| 5 | BICF2G630239850        | 72543321 | A | 0 | 0 | C |
| 5 | BICF2G630239829        | 72554750 | G | 0 | 0 | A |
| 5 | BICF2P1162890          | 72571944 | G | 1 | 1 | A |
| 5 | BICF2P287003           | 72577782 | A | 0 | 0 | C |
| 5 | BICF2G630239803        | 72603225 | G | 0 | 0 | A |
| 5 | BICF2G630239794        | 72607008 | A | 1 | 1 | G |
| 5 | BICF2G630239777        | 72620574 | G | 1 | 1 | A |
| 5 | BICF2G630239747        | 72638895 | A | 0 | 0 | C |
| 5 | BICF2G630239731        | 72647480 | A | 0 | 0 | G |
| 5 | BICF2P633093           | 72658303 | 0 | 0 | 0 | A |
| 5 | BICF2S23156606         | 72670236 | G | 0 | 0 | A |
| 5 | BICF2G630239705        | 72690257 | 0 | 0 | 0 | G |
| 5 | BICF2P1267825          | 72700637 | G | 0 | 0 | A |
| 5 | BICF2P1458515          | 72708781 | G | 0 | 0 | A |
| 5 | TIGRP2P74125_rs8724700 | 72716248 | 0 | 0 | 0 | G |
| 5 | BICF2P467885           | 72728221 | A | 0 | 0 | G |
| 5 | BICF2P674068           | 72743180 | A | 1 | 1 | G |
| 5 | BICF2P1214345          | 72754910 | 0 | 0 | 0 | G |
| 5 | BICF2S23422605         | 72761552 | A | 0 | 0 | G |
| 5 | BICF2S23128923         | 72772399 | 0 | 0 | 0 | C |
| 5 | BICF2S23132939         | 72786292 | A | 0 | 0 | C |
| 5 | BICF2P1134831          | 72805138 | G | 0 | 0 | A |
| 5 | BICF2P1134833          | 72806954 | A | 0 | 0 | G |
| 5 | BICF2P1134838          | 72808418 | C | 0 | 0 | G |
| 5 | BICF2P784635           | 72825942 | A | 0 | 0 | G |
| 5 | BICF2G630239699        | 72833241 | G | 0 | 0 | A |
| 5 | BICF2P907867           | 72844614 | 0 | 0 | 0 | A |
| 5 | TIGRP2P74129_rs8958825 | 72852658 | 0 | 0 | 0 | A |
| 5 | BICF2G630239696        | 72895601 | A | 0 | 0 | G |
| 5 | BICF2G630239687        | 72909717 | A | 0 | 0 | G |
| 5 | BICF2G630239669        | 72916528 | G | 0 | 0 | A |
| 5 | BICF2P75332            | 72930983 | G | 1 | 1 | A |
| 5 | BICF2G630239653        | 72937144 | G | 0 | 0 | A |
| 5 | BICF2G630239650        | 72947496 | C | 0 | 0 | A |
| 5 | BICF2G630239639        | 72956060 | C | 0 | 0 | A |
| 5 | BICF2G630239622        | 72976310 | C | 0 | 0 | A |
| 5 | BICF2S23324064         | 72982383 | T | 0 | 0 | A |
| 5 | TIGRP2P74133_rs8672560 | 72995297 | 0 | 0 | 0 | G |
| 5 | BICF2G630239620        | 73005608 | 0 | 0 | 0 | G |
| 5 | BICF2P221933           | 73017574 | T | 0 | 0 | A |
| 5 | BICF2G630239617        | 73038433 | A | 0 | 0 | G |
| 5 | BICF2G630239609        | 73052398 | G | 0 | 0 | A |
| 5 | BICF2P330751           | 73065026 | A | 0 | 0 | G |
| 5 | BICF2P330750           | 73065271 | 0 | 0 | 0 | G |



|   |                 |          |   |   |   |   |
|---|-----------------|----------|---|---|---|---|
| 5 | BICF2G630239602 | 73074399 | C | 0 | 0 | A |
| 5 | BICF2G630239599 | 73089574 | 0 | 0 | 0 | G |
| 5 | BICF2S2302711   | 73097059 | G | 0 | 0 | A |
| 5 | BICF2G630239581 | 73109857 | 0 | 0 | 0 | A |
| 5 | BICF2G630239562 | 73123006 | 0 | 0 | 0 | A |
| 5 | BICF2G630239556 | 73128590 | A | 0 | 0 | G |
| 5 | BICF2G630239541 | 73144801 | G | 0 | 0 | A |
| 5 | BICF2G630239511 | 73162587 | A | 0 | 0 | C |
| 5 | BICF2G630239510 | 73164119 | A | 0 | 0 | G |
| 5 | BICF2G630239487 | 73185371 | A | 1 | 1 | G |
| 5 | BICF2G630239484 | 73188256 | A | 0 | 0 | G |
| 5 | BICF2P287436    | 73214645 | A | 0 | 0 | G |
| 5 | BICF2P469356    | 73229433 | G | 0 | 0 | A |
| 5 | BICF2G630239446 | 73232784 | A | 0 | 0 | G |
| 5 | BICF2G630239398 | 73250624 | A | 0 | 0 | G |
| 5 | BICF2G630239383 | 73260530 | A | 0 | 0 | C |
| 5 | BICF2P98698     | 73266556 | G | 0 | 0 | A |
| 5 | BICF2G630239334 | 73279356 | G | 1 | 1 | A |
| 5 | BICF2G630239319 | 73295737 | G | 1 | 1 | A |
| 5 | BICF2P747263    | 73302339 | A | 0 | 0 | G |
| 5 | BICF2G630239316 | 73318458 | A | 1 | 1 | G |
| 5 | BICF2G630239311 | 73333993 | A | 1 | 1 | G |
| 5 | BICF2G630239304 | 73338054 | G | 0 | 0 | A |
| 5 | BICF2G630239286 | 73351786 | A | 0 | 0 | G |
| 5 | BICF2G630239269 | 73364115 | A | 0 | 0 | G |
| 5 | BICF2P708903    | 73370597 | G | 0 | 0 | C |
| 5 | BICF2P1423605   | 73381969 | C | 1 | 1 | A |
| 5 | BICF2S23156063  | 73398168 | A | 0 | 0 | G |
| 5 | BICF2P1451281   | 73424513 | A | 0 | 0 | G |
| 5 | BICF2P768152    | 73433523 | A | 1 | 1 | G |
| 5 | BICF2G630239258 | 73448997 | A | 1 | 1 | G |
| 5 | BICF2G630239256 | 73450794 | A | 1 | 1 | G |
| 5 | BICF2P744722    | 73462765 | G | 1 | 1 | A |
| 5 | BICF2G630239243 | 73477770 | A | 0 | 0 | G |
| 5 | BICF2P969806    | 73496959 | 0 | 0 | 0 | G |
| 5 | BICF2G630239241 | 73512474 | G | 0 | 0 | A |
| 5 | BICF2P685871    | 73520124 | A | 1 | 1 | G |
| 5 | BICF2P685870    | 73520141 | G | 1 | 1 | A |
| 5 | BICF2S23727888  | 73545188 | G | 0 | 0 | A |
| 5 | BICF2G630239232 | 73555562 | G | 0 | 0 | A |
| 5 | BICF2G630239231 | 73572918 | A | 0 | 0 | G |
| 5 | BICF2G630239225 | 73584392 | G | 0 | 0 | A |
| 5 | BICF2G630239218 | 73608789 | G | 0 | 0 | A |
| 5 | BICF2G630239215 | 73617054 | A | 0 | 0 | G |
| 5 | BICF2P1100409   | 73623624 | 0 | 0 | 0 | G |
| 5 | BICF2P172684    | 73642713 | 0 | 0 | 0 | C |
| 5 | BICF2S2331542   | 73660477 | C | 0 | 0 | A |

|   |                        |          |   |      |        |   |
|---|------------------------|----------|---|------|--------|---|
| 5 | TIGRP2P74140_rs8940327 | 73673086 | 0 | 0    | 0      | A |
| 5 | BICF2G630239201        | 73696067 | A | 0    | 0      | G |
| 5 | BICF2G630239192        | 73707438 | A | 0    | 0      | G |
| 5 | BICF2P880179           | 73719510 | 0 | 0    | 0      | A |
| 5 | BICF2G630239175        | 73720117 | C | 0    | 0      | A |
| 5 | BICF2G630239170        | 73736736 | 0 | 0    | 0      | G |
| 5 | BICF2G630239169        | 73743668 | G | 0    | 0      | A |
| 5 | BICF2G630239157        | 73749918 | C | 0    | 0      | A |
| 5 | BICF2G630239145        | 73761606 | C | 1    | 1      | A |
| 5 | BICF2G630239124        | 73782818 | G | 0    | 0      | A |
| 5 | BICF2G630239122        | 73786069 | A | 0    | 0      | G |
| 5 | BICF2G630239120        | 73798386 | A | 1    | 1      | G |
| 5 | BICF2G630239116        | 73817830 | A | 0    | 0      | G |
| 5 | BICF2G630239114        | 73828779 | G | 0    | 0      | A |
| 5 | BICF2P1038631          | 73839116 | G | 0    | 0      | A |
| 5 | BICF2G630239106        | 73861873 | C | 1    | 1      | A |
| 5 | BICF2G630239100        | 73867142 | T | 0.75 | 0.8571 | A |
| 5 | BICF2P1361919          | 73882633 | G | 0    | 0      | A |
| 5 | BICF2G630239093        | 73882804 | G | 0.5  | 0.6429 | C |
| 5 | BICF2G630239085        | 73892013 | A | 0.75 | 0.8571 | G |
| 5 | TIGRP2P74204_rs9151137 | 73899337 | 0 | 0    | 0      | G |
| 5 | BICF2G630239073        | 73914842 | G | 0    | 0      | A |
| 5 | BICF2G630239059        | 73926046 | A | 1    | 1      | C |
| 5 | BICF2G630239031        | 73941222 | G | 0    | 0      | A |
| 5 | BICF2S23642308         | 73954398 | A | 0    | 0      | G |
| 5 | BICF2G630239009        | 73979320 | A | 0    | 0      | C |
| 5 | BICF2G630239004        | 73989238 | A | 0    | 0      | G |
| 5 | BICF2P1422777          | 73990917 | G | 0    | 0      | A |
| 5 | BICF2G630238999        | 73991514 | G | 0    | 0      | C |
| 5 | TIGRP2P74233_rs9050710 | 74012803 | A | 0.25 | 0.2143 | G |
| 5 | BICF2P430577           | 74021212 | G | 0.25 | 0.2143 | A |
| 5 | BICF2S23634538         | 74028983 | C | 0.25 | 0.2143 | A |
| 5 | BICF2P52155            | 74037517 | G | 0.75 | 0.8333 | A |
| 5 | BICF2P17924            | 74050411 | A | 0.75 | 0.7857 | G |
| 5 | BICF2P1236223          | 74062405 | A | 1    | 1      | G |
| 5 | BICF2P934785           | 74081558 | A | 0    | 0      | G |
| 5 | BICF2P945138           | 74085459 | C | 0    | 0      | A |
| 5 | BICF2P474755           | 74095897 | G | 0.75 | 0.7857 | A |
| 5 | TIGRP2P74263_rs9081839 | 74122091 | G | 0    | 0      | A |
| 5 | BICF2S23618060         | 74134132 | 0 | 0    | 0      | G |
| 5 | BICF2P394406           | 74144876 | A | 0    | 0      | G |
| 5 | BICF2G630238956        | 74151225 | A | 0.75 | 0.7857 | G |
| 5 | BICF2G630238943        | 74166152 | G | 0.25 | 0.2143 | A |
| 5 | TIGRP2P74273_rs9137653 | 74175266 | G | 0    | 0      | A |
| 5 | BICF2G630238932        | 74187367 | G | 0    | 0      | A |
| 5 | TIGRP2P74282_rs8944571 | 74197030 | G | 0    | 0      | A |
| 5 | BICF2P907423           | 74198240 | C | 0    | 0      | A |

|   |                        |          |   |      |        |   |
|---|------------------------|----------|---|------|--------|---|
| 5 | BICF2S22918871         | 74222524 | A | 0    | 0      | G |
| 5 | BICF2G630238907        | 74253793 | A | 0    | 0      | G |
| 5 | BICF2G630238904        | 74257324 | G | 0    | 0      | A |
| 5 | BICF2G630238903        | 74257564 | A | 0    | 0      | G |
| 5 | BICF2P1040804          | 74278018 | A | 0    | 0      | C |
| 5 | BICF2G630238893        | 74280046 | A | 0    | 0      | G |
| 5 | BICF2P907696           | 74291117 | A | 0    | 0      | G |
| 5 | BICF2P424965           | 74302445 | G | 0    | 0      | A |
| 5 | BICF2P1314195          | 74303153 | G | 0    | 0      | A |
| 5 | BICF2G630238869        | 74322869 | A | 0.25 | 0.2143 | G |
| 5 | BICF2G630238863        | 74331932 | 0 | 0    | 0      | G |
| 5 | BICF2P541650           | 74341418 | G | 0    | 0      | A |
| 5 | BICF2G630238849        | 74347743 | A | 0    | 0      | G |
| 5 | BICF2G630238818        | 74371706 | G | 0    | 0      | A |
| 5 | BICF2G630238810        | 74384152 | A | 0    | 0      | G |
| 5 | BICF2G630238803        | 74398391 | A | 0.25 | 0.2143 | G |
| 5 | BICF2G630238791        | 74417641 | A | 0    | 0      | G |
| 5 | BICF2G630238787        | 74432558 | 0 | 0    | 0      | G |
| 5 | BICF2P807606           | 74449516 | C | 0    | 0      | A |
| 5 | BICF2G630238771        | 74471873 | A | 1    | 1      | G |
| 5 | BICF2G630238769        | 74477201 | A | 0.75 | 0.7857 | G |
| 5 | BICF2G630238764        | 74488605 | A | 0    | 0      | G |
| 5 | TIGRP2P74329_rs9067706 | 74502446 | A | 0.75 | 0.7857 | G |
| 5 | BICF2G630238755        | 74510476 | A | 0.25 | 0.2143 | G |
| 5 | BICF2P708536           | 74526115 | G | 0    | 0      | A |
| 5 | BICF2G630238736        | 74531521 | G | 0    | 0      | A |
| 5 | BICF2G630238720        | 74545250 | G | 0    | 0      | A |
| 5 | BICF2G630238705        | 74557072 | A | 0    | 0      | G |
| 5 | BICF2G630238703        | 74567205 | A | 1    | 1      | G |
| 5 | BICF2G630238691        | 74577509 | A | 0.75 | 0.7857 | G |
| 5 | BICF2G630238648        | 74597740 | G | 0    | 0      | A |
| 5 | BICF2G630238644        | 74607138 | A | 0.75 | 0.7857 | G |
| 5 | BICF2G630238638        | 74612746 | A | 0.75 | 0.7857 | C |
| 5 | BICF2G630238618        | 74623532 | A | 0    | 0      | G |
| 5 | BICF2G630238593        | 74635311 | A | 0.75 | 0.7857 | G |
| 5 | BICF2G630238587        | 74647592 | G | 0.25 | 0.2143 | A |
| 5 | BICF2G630238579        | 74662492 | A | 0    | 0      | G |
| 5 | BICF2P498356           | 74685678 | G | 0.25 | 0.2143 | A |
| 5 | BICF2P230747           | 74693521 | G | 0.25 | 0.2143 | A |
| 5 | BICF2G630238557        | 74704218 | A | 0    | 0      | T |
| 5 | BICF2G630238553        | 74707142 | G | 0.25 | 0.2143 | A |
| 5 | BICF2G630238552        | 74707198 | C | 0.25 | 0.2143 | A |
| 5 | BICF2S23617478         | 74713345 | G | 0    | 0      | C |
| 5 | BICF2G630238542        | 74725840 | C | 0    | 0      | G |
| 5 | BICF2S23448033         | 74730557 | G | 0.75 | 0.7857 | A |
| 5 | BICF2G630238537        | 74743313 | G | 0.75 | 0.7857 | A |
| 5 | BICF2G630238533        | 74752237 | A | 0.25 | 0.2143 | C |

|   |                        |          |   |      |        |   |
|---|------------------------|----------|---|------|--------|---|
| 5 | TIGRP2P74354_rs8652504 | 74762147 | 0 | 0    | 0      | G |
| 5 | BICF2S23241256         | 74776683 | A | 0    | 0      | G |
| 5 | BICF2G630238455        | 74790147 | A | 0.75 | 0.7857 | G |
| 5 | BICF2P810273           | 74797420 | A | 0.75 | 0.7857 | G |
| 5 | BICF2G630238449        | 74798688 | C | 0.75 | 0.7857 | A |
| 5 | BICF2G630238424        | 74802542 | A | 0.75 | 0.7857 | G |
| 5 | BICF2S2412625          | 74810286 | G | 0    | 0      | A |
| 5 | TIGRP2P74359_rs8568385 | 74826769 | G | 0.25 | 0.2143 | A |
| 5 | BICF2G630238417        | 74841669 | G | 0.25 | 0.2143 | A |
| 5 | BICF2G630238416        | 74842073 | A | 0.25 | 0.2143 | G |
| 5 | BICF2G630238395        | 74849595 | A | 0    | 0      | G |
| 5 | BICF2G630238378        | 74862839 | A | 1    | 1      | G |
| 5 | BICF2G630238371        | 74871350 | G | 0.75 | 0.8333 | A |
| 5 | BICF2P466503           | 74880234 | G | 0    | 0      | A |
| 5 | BICF2G630238333        | 74895820 | G | 0    | 0      | A |
| 5 | BICF2G630238323        | 74906585 | A | 0    | 0      | G |
| 5 | BICF2P533384           | 74911480 | C | 0.75 | 0.7857 | A |
| 5 | BICF2P334255           | 74931343 | A | 0.75 | 0.7857 | G |
| 5 | BICF2P972643           | 74938052 | A | 0.75 | 0.7857 | G |
| 5 | BICF2S23118963         | 74950648 | A | 0    | 0      | G |
| 5 | BICF2P1061386          | 74976017 | A | 0.75 | 0.7857 | G |
| 5 | BICF2P1061989          | 74983294 | G | 1    | 1      | A |
| 5 | TIGRP2P74383_rs9036670 | 74991854 | A | 0    | 0      | G |
| 5 | TIGRP2P74385_rs9052551 | 75006259 | C | 0    | 0      | A |
| 5 | BICF2G630238241        | 75017261 | G | 0    | 0      | A |
| 5 | BICF2P1336749          | 75026759 | A | 0    | 0      | G |
| 5 | BICF2G630238178        | 75048923 | C | 0.75 | 0.7857 | A |
| 5 | BICF2G630238167        | 75057564 | A | 1    | 1      | G |
| 5 | BICF2G630238162        | 75062569 | A | 1    | 1      | G |
| 5 | BICF2G630238138        | 75076210 | A | 0    | 0      | G |
| 5 | BICF2G630238119        | 75084852 | A | 0    | 0      | G |
| 5 | BICF2G630238112        | 75095227 | A | 0    | 0      | G |
| 5 | BICF2P235792           | 75113818 | G | 0.25 | 0.2143 | A |
| 5 | TIGRP2P74426_rs8662754 | 75125293 | 0 | 0    | 0      | A |
| 5 | BICF2P168192           | 75133399 | G | 0    | 0      | C |
| 5 | BICF2S23723329         | 75147304 | A | 0    | 0      | G |
| 5 | BICF2S2322813          | 75155106 | G | 0    | 0      | A |
| 5 | BICF2S23641804         | 75171263 | A | 0    | 0      | C |
| 5 | BICF2P1471313          | 75182064 | A | 1    | 1      | G |
| 5 | BICF2S2375260          | 75189050 | G | 1    | 1      | A |
| 5 | BICF2S23235758         | 75205631 | A | 0    | 0      | G |
| 5 | BICF2S23649042         | 75211035 | A | 0    | 0      | G |
| 5 | BICF2P525566           | 75226029 | A | 0.25 | 0.2143 | C |
| 5 | TIGRP2P74428_rs8862114 | 75235684 | A | 1    | 1      | T |
| 5 | BICF2P1087441          | 75250969 | C | 0    | 0      | G |
| 5 | BICF2P1170982          | 75258257 | G | 0.25 | 0.2143 | A |
| 5 | BICF2S23010721         | 75275821 | A | 0.25 | 0.2143 | G |

|   |                        |          |   |      |        |   |
|---|------------------------|----------|---|------|--------|---|
| 5 | BICF2S23650410         | 75289255 | A | 0    | 0      | G |
| 5 | BICF2P764662           | 75300743 | A | 0.25 | 0.2143 | G |
| 5 | BICF2P1311306          | 75305676 | G | 0.25 | 0.2143 | A |
| 5 | BICF2P1103586          | 75319892 | C | 0    | 0      | A |
| 5 | BICF2P366638           | 75331171 | A | 0    | 0      | G |
| 5 | BICF2P83744            | 75342986 | C | 0.75 | 0.7857 | A |
| 5 | BICF2P1100611          | 75354488 | G | 0.25 | 0.2143 | A |
| 5 | BICF2P321788           | 75359006 | G | 0    | 0      | A |
| 5 | BICF2S23330460         | 75369784 | G | 0.75 | 0.7857 | A |
| 5 | BICF2S23624819         | 75380411 | G | 0    | 0      | A |
| 5 | BICF2P961059           | 75382681 | A | 0    | 0      | C |
| 5 | BICF2P1384661          | 75394990 | A | 0    | 0      | G |
| 5 | BICF2P1432168          | 75406902 | G | 0.25 | 0.2143 | A |
| 5 | BICF2S23115128         | 75425177 | G | 0.25 | 0.2143 | A |
| 5 | BICF2P526616           | 75429504 | A | 0    | 0      | G |
| 5 | BICF2P526618           | 75429890 | G | 0.75 | 0.7857 | A |
| 5 | BICF2P595275           | 75441596 | C | 0.75 | 0.7857 | A |
| 5 | BICF2P781060           | 75452643 | A | 0.75 | 0.7857 | G |
| 5 | BICF2P675053           | 75473554 | A | 0    | 0      | G |
| 5 | BICF2P980661           | 75476911 | A | 0    | 0      | G |
| 5 | BICF2S23334898         | 75499890 | A | 0    | 0      | G |
| 5 | BICF2P1262096          | 75510140 | A | 0.75 | 0.7857 | G |
| 5 | BICF2P1215689          | 75521854 | 0 | 0    | 0      | G |
| 5 | TIGRP2P74434_rs8780145 | 75534408 | 0 | 0    | 0      | G |
| 5 | BICF2P192896           | 75552241 | A | 0.25 | 0.2143 | G |
| 5 | BICF2P1108131          | 75565993 | G | 0    | 0      | A |
| 5 | BICF2S23148563         | 75568887 | C | 0    | 0      | G |
| 5 | BICF2P983531           | 75588056 | 0 | 0    | 0      | A |
| 5 | BICF2S23318910         | 75605465 | G | 0.25 | 0.2143 | A |
| 5 | BICF2P606314           | 75616507 | 0 | 0    | 0      | C |
| 5 | BICF2P1326037          | 75629294 | A | 0    | 0      | G |
| 5 | BICF2P596370           | 75638383 | A | 0.75 | 0.7857 | G |
| 5 | BICF2P1304755          | 75648422 | A | 0.25 | 0.2143 | C |
| 5 | BICF2S23648174         | 75664243 | A | 0.25 | 0.2143 | G |
| 5 | BICF2P277083           | 75681334 | A | 0.75 | 0.7857 | G |
| 5 | BICF2P744747           | 75691532 | A | 0    | 0      | G |
| 5 | BICF2S23024731         | 75701449 | A | 0    | 0      | G |
| 5 | BICF2S23029870         | 75705312 | G | 0.75 | 0.7857 | A |
| 5 | BICF2P791785           | 75710339 | A | 0    | 0      | G |
| 5 | BICF2P791787           | 75710485 | A | 0.25 | 0.2143 | G |
| 5 | BICF2P259433           | 75722315 | A | 1    | 1      | G |
| 5 | BICF2S2356258          | 75737267 | A | 0    | 0      | G |
| 5 | BICF2P1237609          | 75743481 | G | 0    | 0      | A |
| 5 | BICF2P1034274          | 75749754 | A | 0.25 | 0.2143 | G |
| 5 | BICF2S23641888         | 75760468 | A | 0    | 0      | G |
| 5 | BICF2P253481           | 75769665 | A | 0    | 0      | G |
| 5 | BICF2P269251           | 75774586 | 0 | 0    | 0      | A |

|   |                        |          |   |      |        |   |
|---|------------------------|----------|---|------|--------|---|
| 5 | BICF2S22954357         | 75787288 | G | 0    | 0      | A |
| 5 | BICF2P451975           | 75800035 | G | 0    | 0      | A |
| 5 | BICF2S23449139         | 75810700 | G | 1    | 1      | A |
| 5 | BICF2S2371215          | 75819791 | G | 1    | 1      | A |
| 5 | BICF2P1295312          | 75833527 | A | 0.75 | 0.7857 | G |
| 5 | BICF2S23154811         | 75843878 | A | 1    | 1      | G |
| 5 | BICF2P76256            | 75855667 | A | 0.25 | 0.2143 | G |
| 5 | BICF2P356847           | 75868081 | A | 0    | 0      | G |
| 5 | BICF2P1085939          | 75882052 | G | 0    | 0      | A |
| 5 | BICF2P279143           | 75897610 | G | 0.25 | 0.2143 | A |
| 5 | BICF2P256380           | 75916767 | T | 1    | 1      | A |
| 5 | BICF2S22943145         | 75927690 | A | 0.25 | 0.2143 | C |
| 5 | BICF2P294742           | 75935413 | G | 0.75 | 0.7143 | A |
| 5 | BICF2S23626509         | 75948857 | C | 0.75 | 0.7857 | A |
| 5 | BICF2S22939223         | 75952401 | A | 0.75 | 0.7857 | C |
| 5 | BICF2S2335234          | 75959851 | A | 0    | 0      | G |
| 5 | BICF2S23710745         | 75973965 | A | 0    | 0      | C |
| 5 | TIGRP2P74441_rs8614804 | 75987166 | 0 | 0    | 0      | G |
| 5 | BICF2S2374753          | 76000298 | A | 0    | 0      | G |
| 5 | BICF2P11341            | 76013968 | G | 0    | 0      | A |
| 5 | BICF2P479316           | 76016288 | C | 0.25 | 0.2143 | A |
| 5 | BICF2S23721520         | 76052349 | G | 0.5  | 0.5    | A |
| 5 | BICF2S23717194         | 76073934 | A | 0.5  | 0.5    | C |
| 5 | BICF2S23610187         | 76095548 | A | 0    | 0      | G |
| 5 | BICF2P277454           | 76116890 | 0 | 0    | 0      | A |
| 5 | BICF2P256226           | 76124458 | C | 0.75 | 0.7143 | A |
| 5 | BICF2S23526474         | 76129534 | A | 0    | 0      | G |
| 5 | BICF2P236475           | 76134972 | 0 | 0    | 0      | C |
| 5 | BICF2P305708           | 76143427 | A | 0    | 0      | G |
| 5 | G355f56S136            | 76169133 | A | 1    | 1      | G |
| 5 | BICF2S23538757         | 76193820 | A | 0.75 | 0.7857 | G |
| 5 | BICF2P1425833          | 76201263 | C | 0    | 0      | A |
| 5 | BICF2P1104560          | 76212122 | G | 0    | 0      | A |
| 5 | BICF2S23551041         | 76222312 | A | 0.5  | 0.5    | G |
| 5 | BICF2P789098           | 76239372 | A | 0    | 0      | G |
| 5 | BICF2P1274553          | 76248560 | A | 0.5  | 0.5    | C |
| 5 | BICF2P670653           | 76260181 | 0 | 0    | 0      | A |
| 5 | BICF2P453940           | 76278140 | A | 0.5  | 0.5    | G |
| 5 | BICF2S23658742         | 76278648 | A | 0    | 0      | G |
| 5 | BICF2S23657572         | 76283036 | A | 0.5  | 0.5    | C |
| 5 | BICF2P551628           | 76297870 | T | 0    | 0      | A |
| 5 | BICF2S22950408         | 76308391 | C | 0    | 0      | A |
| 5 | BICF2P1145385          | 76312633 | G | 0    | 0      | A |
| 5 | BICF2P597433           | 76321734 | A | 0.25 | 0.2857 | G |
| 5 | BICF2P140966           | 76346994 | G | 0    | 0      | A |
| 5 | BICF2P517559           | 76357037 | G | 0.25 | 0.2143 | A |
| 5 | BICF2P520274           | 76364073 | A | 1    | 1      | C |

|   |                 |          |   |      |        |   |
|---|-----------------|----------|---|------|--------|---|
| 5 | BICF2P948849    | 76380142 | G | 0.25 | 0.2143 | C |
| 5 | BICF2P1002496   | 76386896 | C | 0.25 | 0.2143 | A |
| 5 | BICF2S23613445  | 76395077 | A | 0.75 | 0.7857 | C |
| 5 | BICF2S23633793  | 76407885 | G | 0.25 | 0.2143 | A |
| 5 | BICF2P433434    | 76424969 | G | 0.25 | 0.2143 | A |
| 5 | BICF2P278121    | 76430571 | A | 0.75 | 0.7857 | G |
| 5 | BICF2S23010712  | 76448180 | A | 0.5  | 0.5    | G |
| 5 | BICF2S2352278   | 76456161 | G | 0.5  | 0.5    | A |
| 5 | BICF2P105586    | 76472161 | G | 0.25 | 0.2143 | A |
| 5 | BICF2S2328460   | 76476332 | G | 0.5  | 0.5    | A |
| 5 | BICF2S23614965  | 76492076 | A | 0.25 | 0.2143 | G |
| 5 | BICF2P775279    | 76501162 | A | 0.25 | 0.2143 | G |
| 5 | BICF2S23735344  | 76506078 | A | 0    | 0      | G |
| 5 | BICF2P587644    | 76509555 | A | 0.25 | 0.2857 | G |
| 5 | BICF2P1373154   | 76523940 | A | 0    | 0      | G |
| 5 | BICF2S22960737  | 76535768 | C | 0    | 0      | G |
| 5 | BICF2P882089    | 76553509 | A | 0    | 0      | G |
| 5 | BICF2P40483     | 76558928 | G | 0.25 | 0.2143 | A |
| 5 | BICF2P877243    | 76576065 | G | 0.25 | 0.2857 | A |
| 5 | BICF2P575652    | 76578482 | A | 0.75 | 0.7857 | G |
| 5 | BICF2P321044    | 76584246 | C | 0.25 | 0.2857 | G |
| 5 | BICF2G630238042 | 76597554 | T | 0.75 | 0.7857 | A |
| 5 | BICF2G630238037 | 76599382 | A | 0.25 | 0.25   | G |
| 5 | BICF2G630238027 | 76607923 | G | 0.25 | 0.2857 | A |
| 5 | BICF2G630238013 | 76615243 | C | 0.25 | 0.2857 | A |
| 5 | BICF2G630238009 | 76624812 | G | 0.75 | 0.7857 | A |
| 5 | BICF2G630237990 | 76643928 | G | 0.25 | 0.2857 | A |
| 5 | BICF2P604278    | 76652568 | A | 0    | 0      | C |
| 5 | BICF2G630237965 | 76662168 | C | 0.25 | 0.2143 | G |
| 5 | BICF2P907158    | 76672593 | A | 0.25 | 0.2143 | G |
| 5 | BICF2G630237959 | 76687692 | A | 0    | 0      | T |
| 5 | BICF2P910925    | 76729805 | 0 | 0    | 0      | A |
| 5 | BICF2G630237944 | 76745647 | A | 0.25 | 0.2143 | G |
| 5 | BICF2S2366938   | 76753487 | A | 0    | 0      | G |
| 5 | BICF2G630237908 | 76774877 | G | 0.75 | 0.7857 | A |
| 5 | BICF2P413559    | 76797078 | C | 0.75 | 0.7143 | A |
| 5 | BICF2P1002252   | 76813633 | G | 0    | 0      | A |
| 5 | BICF2G630237900 | 76820699 | A | 0.5  | 0.5    | G |
| 5 | BICF2P435893    | 76842075 | A | 0.5  | 0.5    | G |
| 5 | BICF2P358530    | 76858190 | 0 | 0    | 0      | G |
| 5 | BICF2P521576    | 76872361 | A | 0.5  | 0.5    | G |
| 5 | BICF2S23247925  | 76880262 | G | 0.5  | 0.5    | A |
| 5 | BICF2P624631    | 76889611 | 0 | 0    | 0      | C |
| 5 | BICF2P552783    | 76906234 | A | 0    | 0      | G |
| 5 | BICF2P1015291   | 76916364 | C | 0.25 | 0.2143 | A |
| 5 | BICF2S24318081  | 76924201 | A | 0.75 | 0.7857 | T |
| 5 | BICF2P220782    | 76945349 | A | 0.25 | 0.2143 | G |

|   |                        |          |   |      |        |   |
|---|------------------------|----------|---|------|--------|---|
| 5 | BICF2S23153978         | 76949783 | G | 0.25 | 0.2857 | A |
| 5 | BICF2S23641931         | 76999500 | C | 0.25 | 0.2857 | A |
| 5 | BICF2S2398991          | 77014360 | A | 0.25 | 0.2857 | G |
| 5 | BICF2P1086565          | 77024037 | C | 0.75 | 0.7143 | G |
| 5 | BICF2S23327736         | 77036472 | A | 0.75 | 0.7143 | G |
| 5 | BICF2S23011045         | 77040668 | A | 0.75 | 0.7143 | G |
| 5 | BICF2P200952           | 77052373 | A | 0.75 | 0.7143 | G |
| 5 | TIGRP2P74483_rs9035285 | 77062337 | 0 | 0    | 0      | C |
| 5 | BICF2S23437454         | 77080017 | G | 0.75 | 0.7143 | A |
| 5 | BICF2S23650778         | 77100802 | G | 0.75 | 0.7143 | A |
| 5 | BICF2P529114           | 77115858 | A | 0    | 0      | G |
| 5 | BICF2P281411           | 77122164 | A | 0.25 | 0.2143 | G |
| 5 | BICF2P410471           | 77136150 | A | 0    | 0      | G |
| 5 | BICF2P1460559          | 77143819 | A | 0    | 0      | G |
| 5 | BICF2S23319208         | 77161031 | G | 0.5  | 0.5    | A |
| 5 | BICF2P379950           | 77172629 | A | 0    | 0      | G |
| 5 | BICF2P1211863          | 77187434 | A | 0    | 0      | T |
| 5 | BICF2S23646549         | 77189734 | A | 0.25 | 0.2143 | G |
| 5 | BICF2P772267           | 77207882 | G | 0.5  | 0.5    | A |
| 5 | BICF2S23425529         | 77216239 | A | 0.25 | 0.2143 | G |
| 5 | BICF2S23120302         | 77239771 | A | 0    | 0      | G |
| 5 | BICF2P344950           | 77254283 | A | 0.25 | 0.2143 | G |
| 5 | BICF2P471058           | 77259372 | A | 0.5  | 0.5    | G |
| 5 | BICF2P192262           | 77269994 | A | 0.5  | 0.5    | G |
| 5 | BICF2P553400           | 77280014 | A | 0    | 0      | G |
| 5 | BICF2P306631           | 77290407 | G | 0.25 | 0.2143 | C |
| 5 | BICF2P1266312          | 77300255 | G | 0.25 | 0.2143 | A |
| 5 | BICF2P979819           | 77306504 | A | 0.25 | 0.1667 | G |
| 5 | BICF2P99215            | 77318448 | A | 0    | 0      | G |
| 5 | BICF2P1188277          | 77337216 | A | 0.5  | 0.5    | G |
| 5 | BICF2S23249428         | 77367397 | G | 0    | 0      | A |
| 5 | BICF2S23718407         | 77380714 | A | 0.25 | 0.2857 | G |
| 5 | BICF2P1221558          | 77385205 | A | 0.25 | 0.1667 | G |
| 5 | BICF2P1076142          | 77400770 | G | 0.25 | 0.2143 | A |
| 5 | BICF2P1303114          | 77417808 | A | 0.25 | 0.25   | G |
| 5 | BICF2P261187           | 77420806 | C | 0.75 | 0.7143 | A |
| 5 | BICF2P393228           | 77433333 | G | 0.25 | 0.2857 | A |
| 5 | BICF2S23738370         | 77458766 | A | 0.5  | 0.5    | G |
| 5 | BICF2S23237461         | 77470586 | G | 0    | 0      | A |
| 5 | BICF2P112101           | 77477756 | 0 | 0    | 0      | A |
| 5 | BICF2S2379709          | 77491913 | 0 | 0    | 0      | G |
| 5 | BICF2P792026           | 77501182 | A | 0.75 | 0.7143 | G |
| 5 | BICF2P457467           | 77517988 | A | 0.25 | 0.2143 | G |
| 5 | BICF2S23723904         | 77522606 | A | 0.5  | 0.5    | G |
| 5 | BICF2P295441           | 77538011 | A | 0.5  | 0.5    | G |
| 5 | BICF2P1053844          | 77544612 | A | 0.25 | 0.2143 | C |
| 5 | BICF2P1085616          | 77566277 | A | 0.5  | 0.5    | C |



|   |                        |          |   |      |        |   |
|---|------------------------|----------|---|------|--------|---|
| 5 | BICF2S23727725         | 77572280 | G | 0    | 0      | A |
| 5 | BICF2P217620           | 77584004 | A | 0.25 | 0.2143 | G |
| 5 | BICF2P198477           | 77603086 | A | 0.25 | 0.2143 | G |
| 5 | BICF2P1337735          | 77616550 | G | 0.5  | 0.4286 | A |
| 5 | BICF2P492839           | 77627567 | 0 | 0    | 0      | A |
| 5 | BICF2S23648659         | 77653897 | 0 | 0    | 0      | G |
| 5 | BICF2S23221966         | 77677531 | A | 0.25 | 0.2    | G |
| 5 | BICF2P341036           | 77686070 | A | 0.25 | 0.2143 | G |
| 5 | BICF2P771581           | 77694674 | G | 0.5  | 0.5    | A |
| 5 | BICF2S2346016          | 77716491 | G | 0.75 | 0.7857 | A |
| 5 | BICF2S22949529         | 77725781 | T | 0    | 0      | A |
| 5 | BICF2P1402953          | 77739188 | 0 | 0    | 0      | A |
| 5 | BICF2S23714922         | 77745591 | A | 0.5  | 0.4286 | G |
| 5 | BICF2P603658           | 77751621 | A | 0    | 0      | G |
| 5 | BICF2P1224248          | 77763140 | A | 0.25 | 0.2857 | G |
| 5 | BICF2P872640           | 77784887 | G | 0.5  | 0.5    | A |
| 5 | BICF2P833448           | 77791225 | A | 0.25 | 0.2857 | G |
| 5 | BICF2P833458           | 77792617 | A | 0.25 | 0.25   | C |
| 5 | BICF2P1234092          | 77799176 | A | 0.25 | 0.2857 | G |
| 5 | BICF2P364660           | 77812382 | G | 0.25 | 0.2143 | A |
| 5 | BICF2P632907           | 77821333 | A | 0.5  | 0.5    | G |
| 5 | BICF2P561672           | 77834560 | G | 0.5  | 0.5    | A |
| 5 | BICF2P1190411          | 77850134 | C | 0.5  | 0.5    | G |
| 5 | BICF2P1134467          | 77856712 | A | 0    | 0      | C |
| 5 | TIGRP2P74510_rs8899522 | 77874593 | 0 | 0    | 0      | A |
| 5 | BICF2P1210309          | 77880825 | A | 0    | 0      | G |
| 5 | BICF2P1335787          | 77890774 | G | 0.5  | 0.5    | A |
| 5 | BICF2P691586           | 77915931 | A | 0.25 | 0.2143 | T |
| 5 | BICF2P351817           | 77941109 | 0 | 0    | 0      | A |
| 5 | BICF2S23417919         | 77952599 | A | 0.5  | 0.5    | G |
| 5 | BICF2S23512051         | 78003804 | G | 0.25 | 0.2857 | A |
| 5 | BICF2P445970           | 78012253 | 0 | 0    | 0      | A |
| 5 | BICF2S23343143         | 78020041 | A | 0.25 | 0.2857 | G |
| 5 | BICF2P664157           | 78038863 | C | 0.75 | 0.7857 | A |
| 5 | BICF2S23243433         | 78049590 | A | 0    | 0      | G |
| 5 | BICF2P880002           | 78060575 | C | 0.25 | 0.2857 | G |
| 5 | BICF2S23220618         | 78068436 | A | 0    | 0      | G |
| 5 | BICF2S2365872          | 78081601 | G | 0.25 | 0.2143 | A |
| 5 | BICF2P987661           | 78091794 | G | 0.25 | 0.2143 | A |
| 5 | BICF2P1342129          | 78101262 | G | 0    | 0      | A |
| 5 | BICF2P537153           | 78111890 | G | 0    | 0      | A |
| 5 | BICF2P1169180          | 78135199 | A | 0.25 | 0.2143 | G |
| 5 | BICF2P575848           | 78143484 | A | 0.25 | 0.2143 | G |
| 5 | BICF2P757789           | 78164665 | A | 0.25 | 0.2143 | G |
| 5 | BICF2S23542292         | 78173984 | A | 0.25 | 0.2143 | G |
| 5 | BICF2S22939955         | 78178282 | G | 0.5  | 0.3333 | A |
| 5 | BICF2P1185687          | 78203565 | G | 0.25 | 0.2143 | A |

|   |                        |          |   |      |        |   |
|---|------------------------|----------|---|------|--------|---|
| 5 | BICF2P746082           | 78211465 | C | 0    | 0      | A |
| 5 | BICF2P1172338          | 78222290 | A | 0.25 | 0.25   | G |
| 5 | BICF2P70507            | 78227032 | A | 0    | 0      | G |
| 5 | BICF2P1096776          | 78236619 | A | 0    | 0      | G |
| 5 | TIGRP2P74520_rs8986773 | 78250106 | 0 | 0    | 0      | G |
| 5 | BICF2P1406685          | 78258347 | G | 0    | 0      | A |
| 5 | BICF2P478495           | 78270303 | A | 0    | 0      | G |
| 5 | BICF2P157965           | 78294237 | A | 0.25 | 0.2143 | G |
| 5 | BICF2P228357           | 78310223 | T | 0.25 | 0.2857 | A |
| 5 | BICF2P168255           | 78326806 | A | 0    | 0      | G |
| 5 | BICF2P1038269          | 78358223 | C | 0.25 | 0.2143 | A |
| 5 | BICF2P695998           | 78361000 | C | 0.25 | 0.2143 | A |
| 5 | BICF2P324659           | 78381705 | C | 0.25 | 0.2143 | A |
| 5 | BICF2P994453           | 78387847 | A | 0    | 0      | C |
| 5 | BICF2P1099772          | 78416196 | A | 0    | 0      | G |
| 5 | BICF2P255110           | 78425016 | A | 0    | 0      | G |
| 5 | BICF2P542950           | 78437368 | G | 0.25 | 0.2143 | A |
| 5 | BICF2P770917           | 78452288 | A | 0    | 0      | G |
| 5 | BICF2P265273           | 78453978 | A | 0    | 0      | G |
| 5 | BICF2P1458168          | 78466356 | A | 0.25 | 0.2143 | G |
| 5 | BICF2P757106           | 78479172 | G | 0.25 | 0.2143 | A |
| 5 | BICF2P573955           | 78497024 | G | 0.25 | 0.2143 | A |
| 5 | BICF2P1393995          | 78505484 | 0 | 0    | 0      | A |
| 5 | BICF2P1055428          | 78518547 | G | 0.5  | 0.4286 | A |
| 5 | BICF2P884698           | 78525890 | G | 0    | 0      | A |
| 5 | BICF2P903598           | 78534982 | A | 0    | 0      | G |
| 5 | BICF2P1222477          | 78546290 | C | 0    | 0      | A |
| 5 | BICF2P651457           | 78561129 | A | 0    | 0      | G |
| 5 | BICF2S23411861         | 78573283 | A | 0.25 | 0.2857 | G |
| 5 | BICF2P1233816          | 78584180 | G | 0.25 | 0.2857 | C |
| 5 | BICF2P884310           | 78593664 | A | 0.25 | 0.2857 | G |
| 5 | BICF2P1060811          | 78605802 | G | 1    | 0.7143 | A |
| 5 | BICF2P345035           | 78615242 | A | 0.75 | 0.7143 | G |
| 5 | BICF2P1276357          | 78617952 | A | 0    | 0      | G |
| 5 | BICF2P406829           | 78626208 | A | 0.25 | 0.2857 | G |
| 5 | BICF2P110015           | 78644496 | A | 0.25 | 0.2857 | G |
| 5 | BICF2P650718           | 78654574 | A | 0.25 | 0.2857 | C |
| 5 | BICF2P596822           | 78668781 | A | 0.75 | 0.7143 | G |
| 5 | BICF2P594711           | 78680880 | G | 0.25 | 0.2857 | A |
| 5 | BICF2P1230152          | 78687243 | G | 0.75 | 0.7143 | A |
| 5 | BICF2P453140           | 78702445 | G | 0    | 0      | A |
| 5 | BICF2P1146125          | 78708631 | A | 0    | 0      | G |
| 5 | BICF2P445715           | 78725207 | A | 0    | 0      | G |
| 5 | BICF2P658211           | 78729305 | G | 0    | 0      | A |
| 5 | BICF2S23254812         | 78743384 | A | 0    | 0      | G |
| 5 | BICF2S22957436         | 78758672 | A | 0    | 0      | G |
| 5 | BICF2P1333692          | 78769488 | G | 0.5  | 0.5714 | A |

|   |                        |          |   |      |        |   |
|---|------------------------|----------|---|------|--------|---|
| 5 | BICF2P396145           | 78780788 | A | 0    | 0      | C |
| 5 | BICF2P276902           | 78787304 | 0 | 0    | 0      | A |
| 5 | BICF2P97761            | 78806696 | 0 | 0    | 0      | A |
| 5 | BICF2P404578           | 78814915 | G | 0    | 0      | C |
| 5 | BICF2P216384           | 78825339 | A | 0.5  | 0.5714 | G |
| 5 | BICF2P1262776          | 78839054 | C | 0    | 0      | G |
| 5 | BICF2P1374060          | 78847455 | A | 0    | 0      | G |
| 5 | BICF2P268447           | 78862849 | A | 0    | 0      | G |
| 5 | BICF2P67693            | 78867341 | G | 0    | 0      | A |
| 5 | BICF2P1438212          | 78889949 | A | 0.5  | 0.5714 | C |
| 5 | BICF2S23438427         | 78890745 | A | 0    | 0      | T |
| 5 | BICF2S23521542         | 78904012 | A | 0    | 0      | G |
| 5 | BICF2P488596           | 78915627 | A | 0.5  | 0.5714 | G |
| 5 | BICF2P1439891          | 78928004 | A | 0    | 0      | G |
| 5 | BICF2P838279           | 78966981 | G | 0    | 0      | A |
| 5 | BICF2P563345           | 78971552 | G | 1    | 1      | A |
| 5 | BICF2P1263867          | 78984517 | A | 0    | 0      | G |
| 5 | BICF2P370990           | 78998011 | A | 0    | 0      | T |
| 5 | BICF2P523308           | 79008866 | C | 0    | 0      | A |
| 5 | BICF2P1106483          | 79024717 | A | 0    | 0      | C |
| 5 | BICF2P223449           | 79028905 | C | 0.5  | 0.5714 | A |
| 5 | BICF2P120791           | 79047969 | C | 0    | 0      | A |
| 5 | BICF2P558384           | 79058634 | G | 0    | 0      | A |
| 5 | BICF2P703501           | 79079463 | A | 0    | 0      | G |
| 5 | BICF2P1187669          | 79090831 | A | 0.5  | 0.4286 | C |
| 5 | BICF2P801215           | 79109322 | G | 0    | 0      | A |
| 5 | BICF2P771372           | 79142536 | G | 0    | 0      | A |
| 5 | BICF2S23534026         | 79150374 | 0 | 0    | 0      | G |
| 5 | BICF2P553061           | 79165613 | A | 0    | 0      | C |
| 5 | BICF2P676718           | 79176194 | G | 0    | 0      | A |
| 5 | BICF2P1186166          | 79191510 | C | 0    | 0      | G |
| 5 | TIGRP2P74548_rs9174853 | 79226313 | 0 | 0    | 0      | G |
| 5 | BICF2S23422517         | 79237910 | A | 0.5  | 0.4286 | G |
| 5 | BICF2S23623158         | 79269277 | A | 0.5  | 0.4286 | G |
| 5 | BICF2S2366695          | 79271446 | 0 | 0    | 0      | A |
| 5 | BICF2P1142258          | 79283549 | G | 0.75 | 0.7857 | A |
| 5 | BICF2S2339101          | 79297457 | A | 0.25 | 0      | C |
| 5 | BICF2P904193           | 79305089 | 0 | 0    | 0      | C |
| 5 | BICF2P660308           | 79320498 | C | 0.25 | 0.2143 | A |
| 5 | TIGRP2P74566_rs8798601 | 79343581 | 0 | 0    | 0      | C |
| 5 | BICF2P1006569          | 79382670 | 0 | 0    | 0      | A |
| 5 | BICF2P479520           | 79391075 | 0 | 0    | 0      | A |
| 5 | BICF2S23243790         | 79407035 | G | 0.5  | 0.5714 | A |
| 5 | BICF2S2359345          | 79407580 | A | 0.5  | 0.5714 | C |
| 5 | BICF2S23255827         | 79442427 | A | 0.5  | 0.5714 | G |
| 5 | BICF2P287049           | 79462093 | 0 | 0    | 0      | C |
| 5 | TIGRP2P74573_rs8708481 | 79478150 | 0 | 0    | 0      | G |

|   |                        |          |   |      |        |   |
|---|------------------------|----------|---|------|--------|---|
| 5 | BICF2P934033           | 79492867 | 0 | 0    | 0      | G |
| 5 | BICF2P309765           | 79517937 | 0 | 0    | 0      | C |
| 5 | BICF2S2297212          | 79522993 | A | 0    | 0      | G |
| 5 | BICF2P1064351          | 79545777 | 0 | 0    | 0      | A |
| 5 | BICF2S23761304         | 79560308 | A | 0    | 0      | G |
| 5 | BICF2P894439           | 79577467 | 0 | 0    | 0      | G |
| 5 | BICF2P1067313          | 79584926 | G | 0    | 0      | A |
| 5 | BICF2P957527           | 79601154 | G | 0    | 0      | C |
| 5 | BICF2P93284            | 79612824 | A | 0    | 0      | G |
| 5 | BICF2S23122830         | 79638040 | A | 0.5  | 0.5    | G |
| 5 | BICF2S23225232         | 79654073 | A | 0.75 | 0.75   | G |
| 5 | BICF2P641629           | 79668045 | A | 0    | 0      | G |
| 5 | BICF2P543724           | 79675876 | 0 | 0    | 0      | A |
| 5 | BICF2P889549           | 79687526 | 0 | 0    | 0      | C |
| 5 | BICF2P983566           | 79702618 | G | 0.5  | 0.5    | A |
| 5 | BICF2P491431           | 79708771 | A | 0    | 0.2143 | G |
| 5 | BICF2P691133           | 79726286 | A | 0.5  | 0.5    | G |
| 5 | BICF2P1280107          | 79733517 | A | 0.25 | 0.2143 | G |
| 5 | BICF2S23639629         | 79748306 | C | 0.25 | 0.2143 | G |
| 5 | G356f27S24             | 79781530 | 0 | 0    | 0      | C |
| 5 | BICF2P1243400          | 79804595 | A | 0.5  | 0.5    | G |
| 5 | BICF2P423013           | 79831289 | A | 0.5  | 0.5    | G |
| 5 | BICF2P643533           | 79836110 | 0 | 0    | 0      | G |
| 5 | BICF2S2452507          | 79864080 | 0 | 0    | 0      | G |
| 5 | BICF2P684984           | 79873010 | 0 | 0    | 0      | C |
| 5 | TIGRP2P74577_rs9113068 | 79890647 | 0 | 0    | 0      | A |
| 5 | BICF2S2357479          | 79911628 | G | 0    | 0      | A |
| 5 | BICF2S23732474         | 79936072 | G | 0    | 0      | A |
| 5 | BICF2P931049           | 79955455 | 0 | 0    | 0      | A |
| 5 | TIGRP2P74578_rs8638767 | 79970037 | 0 | 0    | 0      | G |
| 5 | BICF2P184734           | 79972220 | 0 | 0    | 0      | C |
| 5 | BICF2P228970           | 80004238 | 0 | 0    | 0      | A |
| 5 | BICF2P373634           | 80027563 | A | 0    | 0      | G |
| 5 | BICF2P1022237          | 80037053 | A | 0    | 0      | G |
| 5 | BICF2S23427148         | 80074325 | G | 0    | 0      | C |
| 5 | TIGRP2P74581_rs8603211 | 80081504 | 0 | 0    | 0      | C |
| 5 | TIGRP2P74583_rs8569418 | 80086494 | G | 0    | 0      | A |
| 5 | TIGRP2P74585_rs8882658 | 80109196 | 0 | 0    | 0      | G |
| 5 | BICF2P557163           | 80131029 | 0 | 0    | 0      | G |
| 5 | BICF2P1041551          | 80138808 | 0 | 0    | 0      | C |
| 5 | BICF2P1295263          | 80150843 | 0 | 0    | 0      | G |
| 5 | BICF2P1418265          | 80161222 | 0 | 0    | 0      | A |
| 5 | BICF2P1142629          | 80190234 | A | 0    | 0      | G |
| 5 | TIGRP2P74586_rs9121579 | 80205366 | 0 | 0    | 0      | A |
| 5 | BICF2P674952           | 80213154 | G | 0    | 0      | A |
| 5 | BICF2P1329549          | 80229734 | G | 0    | 0      | A |
| 5 | BICF2P1173815          | 80251273 | 0 | 0    | 0      | C |

|   |                        |          |   |      |        |   |
|---|------------------------|----------|---|------|--------|---|
| 5 | TIGRP2P74588_rs8793470 | 80261941 | 0 | 0    | 0      | C |
| 5 | BICF2P771488           | 80279639 | 0 | 0    | 0      | C |
| 5 | BICF2P1168127          | 80292941 | G | 0    | 0      | C |
| 5 | BICF2P597576           | 80308664 | G | 0    | 0      | A |
| 5 | BICF2P1388620          | 80322665 | G | 0    | 0      | A |
| 5 | BICF2S23059016         | 80338819 | G | 0    | 0      | A |
| 5 | BICF2S23059190         | 80343008 | G | 0    | 0      | A |
| 5 | BICF2S23644334         | 80377425 | G | 0.25 | 0.2857 | A |
| 5 | BICF2P22256            | 80386291 | T | 0    | 0      | A |
| 5 | BICF2P1384796          | 80398693 | A | 0.25 | 0.25   | G |
| 5 | BICF2P482369           | 80416250 | A | 0    | 0      | G |
| 5 | TIGRP2P74597_rs8674102 | 80427301 | 0 | 0    | 0      | G |
| 5 | BICF2P1374371          | 80432278 | G | 0.75 | 0.7143 | C |
| 5 | BICF2S2415626          | 80438846 | 0 | 0    | 0      | G |
| 5 | BICF2P999654           | 80451336 | G | 0.75 | 0.7143 | A |
| 5 | BICF2P1457235          | 80457839 | A | 0.25 | 0.2857 | G |
| 5 | BICF2P1212730          | 80497043 | A | 0.25 | 0.25   | C |
| 5 | BICF2S23043880         | 80503581 | C | 0.25 | 0.2857 | G |
| 5 | BICF2P171484           | 80511891 | G | 0.5  | 0.5    | A |
| 5 | BICF2P651953           | 80525807 | G | 0.75 | 0.7143 | A |
| 5 | BICF2P766758           | 80537541 | A | 0.75 | 0.7143 | G |
| 5 | G357f51S288            | 80565233 | 0 | 0    | 0      | G |
| 5 | BICF2P1331418          | 80596842 | A | 0.25 | 0.2857 | C |
| 5 | TIGRP2P74601_rs8921964 | 80615765 | 0 | 0    | 0      | G |
| 5 | TIGRP2P74602_rs9098555 | 80635758 | 0 | 0    | 0      | A |
| 5 | BICF2S2374384          | 80654029 | A | 0    | 0      | C |
| 5 | BICF2P1001866          | 80666429 | A | 0.25 | 0.2857 | C |
| 5 | BICF2P643357           | 80685638 | G | 0.25 | 0.2857 | A |
| 5 | TIGRP2P74603_rs9071261 | 80699403 | 0 | NA   | NA     | A |
| 5 | BICF2P1186062          | 80707339 | 0 | 0    | 0      | G |
| 5 | BICF2P414301           | 80725735 | C | 0    | 0.2857 | A |
| 5 | BICF2P290286           | 80731014 | G | 0.25 | 0.2857 | A |
| 5 | BICF2P1353070          | 80741678 | A | 0.25 | 0.2857 | G |
| 5 | BICF2P412596           | 80761018 | T | 0.25 | 0.2857 | A |
| 5 | TIGRP2P74607_rs8887358 | 80769182 | 0 | 0    | 0      | G |
| 5 | G358f42S122            | 80784502 | 0 | 0    | 0      | C |
| 5 | G358f45S20             | 80796344 | G | 0.25 | 0.2857 | A |
| 5 | BICF2S23411270         | 80799200 | A | 0.25 | 0.25   | G |
| 5 | BICF2P1227870          | 80816868 | G | 0.25 | 0.2857 | A |
| 5 | BICF2S23713959         | 80829485 | A | 0    | 0      | G |
| 5 | BICF2P112508           | 80835013 | 0 | 0    | 0      | A |
| 5 | BICF2P1065576          | 80845504 | C | 0.5  | 0.5    | A |
| 5 | BICF2P649182           | 80868030 | 0 | 0    | 0      | A |
| 5 | BICF2P782334           | 80885805 | 0 | 0    | 0      | C |
| 5 | BICF2P515274           | 80892751 | 0 | 0    | 0      | G |
| 5 | BICF2S23338388         | 80913805 | G | 0.5  | 0.4286 | A |
| 5 | BICF2S2316269          | 80920591 | A | 0.5  | 0.5714 | G |

|   |                        |          |   |      |         |   |
|---|------------------------|----------|---|------|---------|---|
| 5 | BICF2P658100           | 80954632 | 0 | 0    | 0       | A |
| 5 | TIGRP2P74609_rs8990510 | 80969909 | 0 | 0    | 0       | G |
| 5 | BICF2P1043987          | 80998455 | A | 0.25 | 0.2857  | C |
| 5 | BICF2P1078805          | 81008576 | A | 0    | 0       | G |
| 5 | BICF2P682906           | 81036692 | 0 | 0    | 0       | A |
| 5 | BICF2P844771           | 81042705 | A | 0.25 | 0.2857  | G |
| 5 | BICF2P1319778          | 81083575 | G | 0    | 0       | A |
| 5 | BICF2S23137799         | 81101445 | A | 0    | 0       | G |
| 5 | BICF2P573137           | 81133200 | A | 0    | 0       | C |
| 5 | BICF2P515440           | 81151478 | 0 | 0    | 0       | A |
| 5 | BICF2S22954464         | 81196360 | G | 0    | 0.125   | A |
| 5 | BICF2S23258500         | 81237331 | G | 0    | 0.1667  | A |
| 5 | BICF2S23340614         | 81252457 | G | 0.25 | 0.1429  | A |
| 5 | BICF2S2336667          | 81295441 | G | 0    | 0.08333 | A |
| 5 | BICF2S232289           | 81308624 | A | 0    | 0.1429  | G |
| 5 | BICF2P477114           | 81323649 | A | 0.5  | 0.5     | G |
| 5 | BICF2S22920880         | 81365059 | G | 0    | 0.2143  | A |
| 5 | BICF2P572798           | 81403177 | 0 | 0    | 0       | A |
| 5 | BICF2S23157170         | 81427721 | C | 0.25 | 0.2143  | A |
| 5 | BICF2P936230           | 81481856 | A | 0    | 0       | G |
| 5 | BICF2S23144004         | 81493523 | G | 0.5  | 0.5     | A |
| 5 | BICF2P99964            | 81505841 | G | 0.75 | 0.7857  | A |
| 5 | BICF2P1121933          | 81530370 | A | 0.75 | 0.7857  | C |
| 5 | BICF2P156868           | 81537949 | A | 0    | 0       | G |
| 5 | BICF2P10853            | 81547115 | G | 0.75 | 0.7143  | A |
| 5 | BICF2P220299           | 81566234 | A | 0.75 | 0.7143  | G |
| 5 | BICF2P1022362          | 81569748 | A | 0.5  | 0.5     | G |
| 5 | BICF2S23214821         | 81572466 | G | 0    | 0       | A |
| 5 | BICF2P850374           | 81583586 | A | 0.25 | 0.2857  | C |
| 5 | BICF2P1010737          | 81600470 | 0 | 0    | 0       | C |
| 5 | BICF2P685647           | 81605733 | A | 0.25 | 0.2857  | G |
| 5 | BICF2P698040           | 81617081 | 0 | 0    | 0       | C |
| 5 | BICF2P1226027          | 81633676 | A | 0    | 0       | G |
| 5 | BICF2P1089022          | 81648941 | 0 | 0    | 0       | G |
| 5 | BICF2S23319572         | 81651188 | A | 0.5  | 0.5     | G |
| 5 | BICF2S22936793         | 81670223 | G | 0    | 0       | A |
| 5 | BICF2S23431121         | 81681395 | A | 0    | 0       | C |
| 5 | BICF2P258856           | 81690362 | 0 | 0    | 0       | A |
| 5 | BICF2P1359501          | 81697025 | A | 0    | 0       | G |
| 5 | BICF2P740997           | 81710105 | A | 0.25 | 0.2143  | C |
| 5 | BICF2P1264748          | 81724690 | A | 0.5  | 0.4286  | G |
| 5 | BICF2P501959           | 81740735 | G | 0    | 0       | A |
| 5 | BICF2P487199           | 81750844 | T | 0.5  | 0.4286  | A |
| 5 | BICF2P1096337          | 81762550 | A | 0    | 0       | G |
| 5 | BICF2P798185           | 81768370 | G | 0.5  | 0.4286  | A |
| 5 | BICF2P1159106          | 81776593 | C | 0.5  | 0.4286  | A |
| 5 | BICF2P994428           | 81789360 | A | 0    | 0       | G |

|   |                        |          |   |      |        |   |
|---|------------------------|----------|---|------|--------|---|
| 5 | BICF2P451934           | 81803047 | G | 0    | 0      | A |
| 5 | BICF2S23753903         | 81808377 | A | 0    | 0      | G |
| 5 | BICF2P1391754          | 81816418 | A | 0.25 | 0.2857 | G |
| 5 | BICF2S23521397         | 81825996 | G | 0.25 | 0.2143 | A |
| 5 | BICF2S23649005         | 81836688 | A | 0.25 | 0.2143 | G |
| 5 | BICF2P639345           | 81852391 | G | 0.25 | 0.2143 | A |
| 5 | BICF2P318446           | 81863636 | A | 0    | 0      | G |
| 5 | BICF2P139695           | 81869371 | G | 0    | 0      | A |
| 5 | BICF2P1431             | 81885244 | A | 0    | 0      | G |
| 5 | BICF2P856483           | 81892362 | A | 0    | 0      | G |
| 5 | BICF2P526058           | 81916847 | G | 0    | 0      | A |
| 5 | BICF2P570236           | 81927096 | A | 0    | 0      | G |
| 5 | BICF2P1324156          | 81940163 | C | 0.5  | 0.5714 | A |
| 5 | BICF2P989928           | 81950340 | A | 0    | 0      | G |
| 5 | BICF2P1037224          | 81970332 | C | 0.25 | 0.2143 | A |
| 5 | BICF2P1007603          | 81978565 | A | 0.25 | 0.2143 | G |
| 5 | BICF2P213461           | 81991205 | A | 0.5  | 0.5714 | G |
| 5 | BICF2P963805           | 82000595 | A | 0.25 | 0.2143 | C |
| 5 | BICF2P284945           | 82012036 | A | 0.25 | 0.2143 | G |
| 5 | TIGRP2P74637_rs9220749 | 82025816 | A | 0.5  | 0.4286 | T |
| 5 | TIGRP2P74638_rs8740799 | 82033585 | A | 0    | 0      | G |
| 5 | BICF2P479033           | 82065461 | 0 | 0    | 0      | C |
| 5 | BICF2S23026966         | 82089777 | A | 0.25 | 0.2857 | C |
| 5 | BICF2P949209           | 82109215 | A | 0.25 | 0.2857 | G |
| 5 | BICF2P159065           | 82120219 | A | 0    | 0      | G |
| 5 | BICF2P1179501          | 82130025 | 0 | 0    | 0      | G |
| 5 | BICF2S23528772         | 82134285 | A | 0    | 0      | G |
| 5 | BICF2P578406           | 82145629 | 0 | 0    | 0      | C |
| 5 | BICF2P946635           | 82172312 | G | 0.5  | 0.5    | A |
| 5 | BICF2P46320            | 82186830 | G | 0.5  | 0.5    | A |
| 5 | BICF2P1366040          | 82194248 | G | 0.75 | 0.7857 | A |
| 5 | BICF2S23261251         | 82208750 | A | 0.25 | 0.2857 | C |
| 5 | BICF2S23238048         | 82215581 | 0 | 0    | 0      | T |
| 5 | TIGRP2P74673_rs8884982 | 82228153 | G | 0.75 | 0.8333 | A |
| 5 | BICF2P240034           | 82250181 | A | 0.25 | 0.3571 | G |
| 5 | TIGRP2P74677_rs8938896 | 82263944 | C | 0    | 0      | A |
| 5 | BICF2P611915           | 82280522 | A | 0.5  | 0.5    | G |
| 5 | BICF2P154169           | 82283682 | G | 0.5  | 0.5    | A |
| 5 | BICF2P200848           | 82295594 | G | 0.25 | 0.2857 | A |
| 5 | BICF2S22942614         | 82314628 | A | 0.25 | 0.2857 | G |
| 5 | BICF2P269011           | 82317477 | A | 0    | 0      | G |
| 5 | BICF2P1128708          | 82333144 | A | 1    | 0.7143 | C |
| 5 | BICF2P1284677          | 82345869 | G | 0.25 | 0.2857 | A |
| 5 | TIGRP2P74703_rs8804659 | 82363583 | A | 0    | 0      | G |
| 5 | BICF2S23114932         | 82378344 | A | 0.25 | 0.2143 | G |
| 5 | BICF2P994097           | 82390923 | A | 0.5  | 0.5    | G |
| 5 | BICF2S23251982         | 82402458 | A | 0.5  | 0.5    | G |

|   |                        |          |   |      |        |   |
|---|------------------------|----------|---|------|--------|---|
| 5 | BICF2P924797           | 82411928 | G | 0.5  | 0.5    | A |
| 5 | BICF2S23329805         | 82435953 | G | 0.5  | 0.5    | A |
| 5 | BICF2S22947699         | 82449807 | A | 0.75 | 0.7857 | G |
| 5 | BICF2P1210832          | 82471114 | G | 0    | 0      | A |
| 5 | BICF2P1403159          | 82487962 | A | 0.5  | 0.5    | G |
| 5 | BICF2S23447848         | 82497581 | A | 0.5  | 0.5    | G |
| 5 | BICF2P1412928          | 82501061 | G | 0.5  | 0.5    | A |
| 5 | BICF2P366887           | 82522698 | G | 0    | 0      | A |
| 5 | BICF2P1400494          | 82541687 | G | 0.75 | 0.7857 | A |
| 5 | BICF2S234323           | 82556817 | C | 0    | 0      | G |
| 5 | TIGRP2P74751_rs8716448 | 82565945 | A | 0    | 0      | G |
| 5 | BICF2P418463           | 82577052 | G | 0.5  | 0.5    | A |
| 5 | TIGRP2P74761_rs8753236 | 82591905 | A | 0.5  | 0.5    | C |
| 5 | BICF2P334344           | 82594089 | A | 0    | 0      | G |
| 5 | BICF2P189452           | 82609110 | G | 0    | 0      | A |
| 5 | BICF2S23018372         | 82618353 | G | 0    | 0      | A |
| 5 | BICF2P740930           | 82641407 | G | 0.5  | 0.5    | A |
| 5 | TIGRP2P74776_rs9030566 | 82654371 | A | 0.5  | 0.5    | G |
| 5 | TIGRP2P74782_rs8840929 | 82671949 | G | 1    | 1      | A |
| 5 | BICF2P232634           | 82678668 | C | 0.5  | 0.5    | A |
| 5 | BICF2P417412           | 82692799 | A | 0.5  | 0.5    | C |
| 5 | BICF2P1078185          | 82703732 | A | 0.5  | 0.5    | G |
| 5 | BICF2S2411401          | 82716044 | A | 0.5  | 0.5    | G |
| 5 | BICF2S23424207         | 82719922 | C | 0.5  | 0.5    | A |
| 5 | BICF2P225088           | 82745908 | G | 0.5  | 0.5    | A |
| 5 | TIGRP2P74809_rs9136292 | 82754957 | G | 0.5  | 0.5    | A |
| 5 | TIGRP2P74819_rs8950173 | 82773493 | 0 | 0    | 0      | A |
| 5 | BICF2P1255862          | 82799520 | G | 0    | 0      | A |
| 5 | BICF2S23434868         | 82810047 | 0 | 0    | 0      | A |
| 5 | BICF2S2325581          | 82831659 | A | 0    | 0      | G |
| 5 | BICF2P888321           | 82845297 | 0 | 0    | 0      | A |
| 5 | BICF2P1441874          | 82846817 | 0 | 0    | 0      | G |
| 5 | BICF2S244469           | 82879867 | 0 | 0    | 0      | A |
| 5 | BICF2S22945330         | 82885835 | A | 0    | 0      | G |
| 5 | BICF2P243536           | 82894662 | 0 | 0    | 0      | A |
| 5 | BICF2P360755           | 82956464 | 0 | 0    | 0      | G |
| 5 | BICF2S23356966         | 82980875 | C | 1    | 0.7143 | A |
| 5 | BICF2P826188           | 82989817 | T | 0    | 0      | A |
| 5 | TIGRP2P74832_rs8839296 | 83006933 | 0 | 0    | 0      | G |
| 5 | TIGRP2P74834_rs8614371 | 83014654 | A | 0.25 | 0.5    | G |
| 5 | BICF2P1112465          | 83038015 | G | 0.25 | 0.5    | A |
| 5 | BICF2P1088349          | 83044281 | G | 0    | 0      | A |
| 5 | BICF2P581497           | 83104728 | G | 0    | 0      | A |
| 5 | TIGRP2P74854_rs8641188 | 83111263 | C | 0    | 0      | A |
| 5 | BICF2P1218176          | 83127144 | G | 1    | 0.7857 | A |
| 5 | BICF2P146998           | 83142677 | A | 0    | 0      | G |
| 5 | BICF2P1200967          | 83146366 | G | 0    | 0      | A |



|   |                        |          |   |      |        |   |
|---|------------------------|----------|---|------|--------|---|
| 5 | BICF2S23736502         | 83161073 | A | 1    | 0.7143 | C |
| 5 | BICF2P1364953          | 83175177 | A | 1    | 0.7143 | C |
| 5 | TIGRP2P74868_rs9012988 | 83187601 | A | 0    | 0      | G |
| 5 | BICF2P147006           | 83198499 | G | 1    | 0.7143 | A |
| 5 | TIGRP2P74880_rs9068825 | 83212645 | A | 1    | 0.7143 | G |
| 5 | BICF2P438252           | 83215283 | C | 1    | 0.7143 | A |
| 5 | BICF2S23312881         | 83228334 | G | 1    | 0.7143 | A |
| 5 | BICF2P516628           | 83244160 | G | 0.25 | 0.2143 | A |
| 5 | BICF2P1284548          | 83250034 | A | 0.75 | 0.5    | G |
| 5 | BICF2P648260           | 83260776 | G | 0.75 | 0.5    | A |
| 5 | BICF2S23336730         | 83271972 | A | 0.75 | 0.5    | T |
| 5 | BICF2P90887            | 83287730 | A | 0    | 0      | G |
| 5 | TIGRP2P74901_rs9130859 | 83298723 | G | 0    | 0.2857 | C |
| 5 | BICF2P539971           | 83335663 | A | 0    | 0      | G |
| 5 | BICF2S23426085         | 83342648 | G | 0.25 | 0.2143 | C |
| 5 | BICF2P1283151          | 83357091 | T | 0    | 0      | A |
| 5 | BICF2S23753615         | 83405665 | A | 0    | 0      | G |
| 5 | BICF2S23354018         | 83429534 | A | 0.75 | 0.7857 | G |
| 5 | BICF2P1358059          | 83447231 | A | 0.25 | 0.2143 | G |
| 5 | TIGRP2P74924_rs8520835 | 83463857 | A | 0.75 | 0.7857 | G |
| 5 | TIGRP2P74928_rs8948895 | 83474155 | A | 0    | 0.2857 | G |
| 5 | BICF2P1288493          | 83479553 | G | 0.25 | 0.5    | A |
| 5 | BICF2P1415389          | 83501491 | G | 0    | 0      | A |
| 5 | TIGRP2P74936_rs8947700 | 83506314 | 0 | 0    | 0      | A |
| 5 | BICF2S23318836         | 83524154 | A | 0.75 | 0.5    | G |
| 5 | BICF2P32514            | 83530026 | G | 0    | 0.25   | A |
| 5 | BICF2S23057084         | 83533895 | A | 0.25 | 0.2143 | G |
| 5 | TIGRP2P74956_rs8708324 | 83546006 | A | 0.25 | 0.2143 | G |
| 5 | BICF2S23228838         | 83557630 | C | 0    | 0.2857 | G |
| 5 | BICF2P690241           | 83571520 | A | 0.25 | 0.2143 | G |
| 5 | G359f55S51             | 83608737 | A | 0    | 0      | G |
| 5 | TIGRP2P74961_rs8791011 | 83637790 | 0 | 0    | 0      | C |
| 5 | BICF2P1244948          | 83642656 | 0 | 0    | 0      | A |
| 5 | BICF2S2354730          | 83661091 | 0 | 0    | 0      | G |
| 5 | G360f30S181            | 83681168 | C | 0    | 0      | A |
| 5 | BICF2P1168580          | 83702136 | 0 | 0    | 0      | G |
| 5 | BICF2S24413382         | 83711809 | G | 0.75 | 0.5    | A |
| 5 | BICF2S23759391         | 83725340 | A | 0.75 | 0.5    | C |
| 5 | BICF2S23318828         | 83743215 | G | 0.75 | 0.5    | A |
| 5 | TIGRP2P74966_rs8498524 | 83757616 | C | 0.5  | 0.5    | A |
| 5 | TIGRP2P74970_rs8563461 | 83780084 | 0 | 0    | 0      | G |
| 5 | BICF2S23312047         | 83798897 | C | 0    | 0      | G |
| 5 | BICF2P900400           | 83802030 | G | 0.5  | 0.5    | C |
| 5 | BICF2P860831           | 83819550 | C | 0.5  | 0.5    | A |
| 5 | BICF2P462052           | 83844814 | C | 0.5  | 0.2143 | G |
| 5 | TIGRP2P74985_rs8599207 | 83854941 | A | 0.5  | 0.2143 | G |
| 5 | BICF2P1316090          | 83855663 | C | 0.5  | 0.2143 | A |

|   |                        |          |   |      |        |   |
|---|------------------------|----------|---|------|--------|---|
| 5 | BICF2P1311763          | 83861310 | G | 0.5  | 0.2143 | A |
| 5 | BICF2P1369962          | 83870485 | G | 0    | 0      | A |
| 5 | BICF2P845317           | 83887686 | A | 0    | 0      | G |
| 5 | TIGRP2P75014_rs8612167 | 83903527 | G | 0.25 | 0.2857 | A |
| 5 | BICF2S23651669         | 83904880 | A | 0.25 | 0.2857 | G |
| 5 | TIGRP2P75015_rs8683878 | 83920436 | A | 0.25 | 0.2857 | C |
| 5 | TIGRP2P75027_rs8946823 | 83946125 | G | 0    | 0      | A |
| 5 | BICF2P980227           | 83958867 | A | 0    | 0      | G |
| 5 | BICF2P704255           | 83969117 | A | 0    | 0      | G |
| 5 | BICF2P907969           | 83981525 | C | 0    | 0      | A |
| 5 | TIGRP2P75054_rs8985383 | 83986492 | A | 0    | 0      | T |
| 5 | BICF2P1144617          | 84002603 | A | 0.25 | 0.2857 | C |
| 5 | TIGRP2P75056_rs8787542 | 84017831 | A | 0    | 0      | G |
| 5 | BICF2S2301301          | 84052008 | C | 0    | 0.2857 | G |
| 5 | TIGRP2P75060_rs8899330 | 84103388 | G | 0.25 | 0.2857 | A |
| 5 | BICF2S23722882         | 84116335 | A | 0    | 0.2857 | G |
| 5 | BICF2S23522094         | 84136154 | A | 1    | 0.75   | G |
| 5 | BICF2S23548152         | 84145768 | G | 0    | 0.2857 | A |
| 5 | BICF2P452304           | 84168297 | A | 1    | 0.7143 | C |
| 5 | BICF2P1063473          | 84171944 | A | 1    | 0.7143 | G |
| 5 | BICF2P70203            | 84193246 | A | 1    | 0.7143 | G |
| 5 | BICF2P1429054          | 84234556 | A | 1    | 0.75   | G |
| 5 | BICF2P150113           | 84245776 | A | 1    | 0.7143 | G |
| 5 | BICF2P729936           | 84255303 | 0 | 0    | 0      | A |
| 5 | BICF2P681165           | 84270220 | G | 0    | 0      | A |
| 5 | BICF2S23540135         | 84272280 | A | 0    | 0.25   | G |
| 5 | TIGRP2P75066_rs8651427 | 84290656 | C | 0    | 0      | A |
| 5 | BICF2P134458           | 84300719 | G | 0.75 | 0.4286 | A |
| 5 | BICF2P585143           | 84309727 | T | 0.25 | 0.2857 | A |
| 5 | BICF2S23421573         | 84333873 | G | 0    | 0      | A |
| 5 | BICF2P928831           | 84347972 | A | 0.75 | 0.4286 | G |
| 5 | BICF2P1108439          | 84363341 | 0 | 0    | 0      | G |
| 5 | TIGRP2P75069_rs8875210 | 84378171 | T | 0.5  | 0.2143 | A |
| 5 | G361f30S240            | 84392108 | G | 0    | 0      | A |
| 5 | BICF2S23451655         | 84501740 | G | 0.25 | 0.2143 | A |
| 5 | BICF2S23043454         | 84504027 | A | 0.25 | 0.2143 | G |
| 5 | TIGRP2P75080_rs8831344 | 84517548 | A | 0.25 | 0.2143 | C |
| 5 | BICF2P567133           | 84529873 | A | 0.5  | 0.7857 | G |
| 5 | BICF2P236106           | 84544752 | G | 0.5  | 0.7857 | A |
| 5 | BICF2S22925174         | 84559629 | A | 0.25 | 0.3    | G |
| 5 | TIGRP2P75086_rs8882140 | 84577831 | G | 0.5  | 0.7857 | A |
| 5 | BICF2S23011586         | 84585399 | A | 0.25 | 0.5    | G |
| 5 | BICF2P994925           | 84591084 | A | 0.25 | 0.5    | G |
| 5 | BICF2P362347           | 84601225 | G | 0.5  | 0.7857 | A |
| 5 | BICF2P1236811          | 84616992 | G | 0.25 | 0.5    | A |
| 5 | BICF2P1236810          | 84617778 | G | 0.25 | 0.5    | C |
| 5 | BICF2P998860           | 84646644 | 0 | 0    | 0      | A |

|   |                        |          |   |      |        |   |
|---|------------------------|----------|---|------|--------|---|
| 5 | BICF2S23133300         | 84660246 | A | 0.25 | 0.2857 | C |
| 5 | G362f40S256            | 84686563 | G | 0    | 0      | A |
| 5 | BICF2P1416416          | 84720784 | 0 | 0    | 0      | T |
| 5 | BICF2P1152013          | 84787093 | 0 | 0    | 0      | G |
| 5 | BICF2P207053           | 84794368 | 0 | 0    | 0      | G |
| 5 | TIGRP2P75096_rs8620505 | 84801545 | A | 0    | 0      | C |
| 5 | BICF2P1136530          | 84813306 | A | 0.75 | 0.7143 | T |
| 5 | BICF2P73743            | 84877466 | G | 0    | 0      | A |
| 5 | BICF2S23530034         | 84911353 | A | 0    | 0      | G |
| 5 | BICF2S23530033         | 84911469 | C | 0    | 0      | A |
| 5 | BICF2P978080           | 84932441 | 0 | 0    | 0      | A |
| 5 | TIGRP2P75104_rs9114068 | 84963204 | 0 | 0    | 0      | G |
| 5 | BICF2P528065           | 84982784 | 0 | 0    | 0      | C |
| 5 | BICF2P891553           | 84989278 | 0 | 0    | 0      | G |
| 5 | BICF2P258299           | 85016316 | 0 | 0    | 0      | G |
| 5 | BICF2P390438           | 85038436 | 0 | 0    | 0      | A |
| 5 | BICF2S24412081         | 85050442 | 0 | 0    | 0      | A |
| 5 | BICF2P1119161          | 85070084 | 0 | 0    | 0      | A |
| 5 | BICF2S2459240          | 85083653 | G | 0.25 | 0.2857 | A |
| 5 | TIGRP2P75111_rs8806681 | 85098297 | 0 | 0    | 0      | G |
| 5 | BICF2P667463           | 85122962 | C | 0    | 0      | G |
| 5 | BICF2S23739808         | 85126430 | A | 0    | 0.5    | C |
| 5 | TIGRP2P75113_rs8883161 | 85149954 | 0 | 0    | 0      | C |
| 5 | TIGRP2P75114_rs9092503 | 85168513 | 0 | 0    | 0      | C |
| 5 | BICF2S233822           | 85179413 | G | 0.25 | 0.5    | A |
| 5 | BICF2S23334044         | 85188767 | A | 0.25 | 0.5    | G |
| 5 | TIGRP2P75115_rs9023680 | 85192871 | 0 | 0    | 0      | C |
| 5 | BICF2S2348065          | 85213276 | G | 0    | 0.2857 | A |
| 5 | BICF2S24415334         | 85215239 | A | 0.75 | 0.7143 | C |
| 5 | TIGRP2P75118_rs8937987 | 85233671 | 0 | 0    | 0      | A |
| 5 | BICF2P1391586          | 85246527 | C | 0    | 0      | G |
| 5 | TIGRP2P75120_rs9048220 | 85256398 | A | 0.75 | 0.5    | T |
| 5 | BICF2P1508550          | 85291594 | A | 0.75 | 0.5    | G |
| 5 | BICF2P720051           | 85308161 | G | 1    | 0.7143 | A |
| 5 | BICF2S23223785         | 85319943 | A | 0.5  | 0.5    | G |
| 5 | BICF2P1055101          | 85331025 | A | 0.75 | 0.7143 | G |
| 5 | BICF2P171630           | 85349946 | A | 0    | 0      | T |
| 5 | BICF2P1327755          | 85359846 | G | 0.75 | 0.7143 | A |
| 5 | BICF2S23614179         | 85366466 | G | 0.5  | 0.5    | A |
| 5 | BICF2P4270             | 85378780 | A | NA   | 0.375  | T |
| 5 | BICF2P7341             | 85406339 | G | 0    | 0.2857 | A |
| 5 | TIGRP2P75161_rs8912677 | 85411324 | G | 0    | 0.2857 | A |
| 5 | BICF2S23349764         | 85428840 | C | 1    | 1      | A |
| 5 | BICF2P479813           | 85433993 | 0 | 0    | 0      | G |
| 5 | BICF2P497236           | 85452443 | A | 0.25 | 0.2143 | G |
| 5 | TIGRP2P75176_rs8804408 | 85457175 | A | 0    | 0.2143 | C |
| 5 | BICF2P603053           | 85468886 | G | 0.25 | 0.2143 | A |

|   |                        |          |   |      |        |   |
|---|------------------------|----------|---|------|--------|---|
| 5 | BICF2P574012           | 85486627 | G | 0.25 | 0.2143 | A |
| 5 | BICF2P707625           | 85495774 | G | 0.75 | 0.4286 | C |
| 5 | BICF2P1039936          | 85509827 | C | 0    | 0.2143 | A |
| 5 | BICF2P1344770          | 85516596 | G | 0.25 | 0.2143 | A |
| 5 | BICF2P23488            | 85534135 | G | 0.75 | 0.4286 | A |
| 5 | BICF2S23716600         | 85539925 | G | 0.75 | 0.4286 | A |
| 5 | TIGRP2P75204_rs9201036 | 85552416 | C | 0.25 | 0.2143 | A |
| 5 | BICF2S23133417         | 85569773 | A | 0.25 | 0.2143 | G |
| 5 | TIGRP2P75210_rs9165148 | 85580803 | G | 0.25 | 0.2143 | A |
| 5 | TIGRP2P75213_rs9214312 | 85583049 | G | 0.75 | 0.4286 | A |
| 5 | BICF2P1240467          | 85610193 | 0 | 0    | 0      | C |
| 5 | TIGRP2P75219_rs8773625 | 85663346 | 0 | 0    | 0      | A |
| 5 | BICF2P736965           | 85703913 | 0 | 0    | 0      | T |
| 5 | BICF2P479636           | 85723327 | 0 | 0    | 0      | A |
| 5 | TIGRP2P75235_rs8884972 | 85738342 | A | 0.5  | 0.7857 | C |
| 5 | BICF2P794461           | 85755354 | 0 | 0    | 0      | G |
| 5 | TIGRP2P75238_rs8648077 | 85760256 | 0 | 0    | 0      | G |
| 5 | BICF2S23344649         | 85786965 | A | 0.25 | 0.2143 | G |
| 5 | BICF2P398747           | 85798179 | A | 0    | 0      | G |
| 5 | BICF2P209928           | 85798703 | A | 0.5  | 0.5    | G |
| 5 | BICF2P643681           | 85812955 | A | 0    | 0      | G |
| 5 | BICF2P1322089          | 85817880 | 0 | 0    | 0      | A |
| 5 | BICF2P193619           | 85846264 | A | 0    | 0      | G |
| 5 | BICF2P458967           | 85868614 | G | 0.25 | 0.5    | A |
| 5 | BICF2S23655067         | 85881846 | A | 0    | 0      | C |
| 5 | BICF2P717934           | 85888969 | G | 0.25 | 0.2857 | C |
| 5 | BICF2P305431           | 85919183 | C | 0.5  | 0.2143 | A |
| 5 | BICF2P136820           | 85929216 | 0 | 0    | 0      | A |
| 5 | TIGRP2P75257_rs9032815 | 85948030 | A | 0.75 | 0.5    | G |
| 5 | BICF2P166317           | 85953882 | 0 | 0    | 0      | A |
| 5 | BICF2P645065           | 85970780 | G | 0.5  | 0.1667 | A |
| 5 | BICF2P1425161          | 85980313 | G | 0    | 0      | A |
| 5 | BICF2P1085916          | 85994391 | A | 0.5  | 0.7857 | G |
| 5 | BICF2P633960           | 85998059 | G | 0.5  | 0.7857 | A |
| 5 | TIGRP2P75301_rs9046915 | 86013360 | A | 0    | 0.2857 | G |
| 5 | BICF2P852719           | 86028929 | A | 0.5  | 0.5    | G |
| 5 | BICF2S2295560          | 86031501 | A | 0.5  | 0.5    | G |
| 5 | TIGRP2P75325_rs8949803 | 86045748 | G | 0.25 | 0.2857 | A |
| 5 | TIGRP2P75327_rs9201589 | 86064186 | A | 0    | 0      | C |
| 5 | BICF2S23541391         | 86069201 | A | 0.75 | 0.4286 | G |
| 5 | BICF2S23763367         | 86110927 | A | 0.25 | 0.2143 | G |
| 5 | BICF2P460301           | 86112011 | 0 | 0    | 0      | C |
| 5 | BICF2S23137021         | 86124860 | A | 0    | 0      | G |
| 5 | BICF2P42863            | 86146185 | A | 0.25 | 0.2857 | G |
| 5 | BICF2P31552            | 86158895 | A | 0    | 0      | C |
| 5 | TIGRP2P75397_rs9008342 | 86172029 | C | 0.5  | 0.5    | A |
| 5 | TIGRP2P75408_rs8974317 | 86183942 | G | 0    | 0      | A |

|   |                        |          |   |      |        |   |
|---|------------------------|----------|---|------|--------|---|
| 5 | BICF2S23742672         | 86192580 | G | 0    | 0      | A |
| 5 | BICF2S23541350         | 86212701 | A | 0.25 | 0.5    | G |
| 5 | BICF2P840560           | 86221390 | G | 0.5  | 0.5    | A |
| 5 | BICF2P738173           | 86232998 | O | 0    | 0      | A |
| 5 | BICF2S2392196          | 86242496 | G | 0.5  | 0.5    | A |
| 5 | BICF2P1037210          | 86248084 | A | 0    | 0      | G |
| 5 | BICF2P485005           | 86251177 | C | 1    | 1      | A |
| 5 | BICF2P925936           | 86268558 | G | 1    | 1      | A |
| 5 | BICF2S22946128         | 86277141 | A | 0    | 0      | G |
| 5 | BICF2P489630           | 86283951 | A | 1    | 0.7143 | C |
| 5 | BICF2S23148421         | 86284586 | A | 1    | 0.7143 | G |
| 5 | BICF2P1305460          | 86307504 | A | 0    | 0      | G |
| 5 | BICF2P1087177          | 86331535 | A | 0    | 0.2857 | C |
| 5 | BICF2P258546           | 86351283 | G | 0.5  | 0.5    | A |
| 5 | TIGRP2P75532_rs8516428 | 86368455 | G | 0.5  | 0.7143 | A |
| 5 | BICF2P115041           | 86386676 | A | 0    | 0      | G |
| 5 | TIGRP2P75567_rs8617189 | 86404625 | G | 0.5  | 0.2857 | A |
| 5 | BICF2P1087566          | 86410759 | A | 0    | 0      | G |
| 5 | BICF2S23143270         | 86420690 | A | 0.25 | 0.2857 | G |
| 5 | BICF2S23656455         | 86424312 | G | 0.25 | 0.5    | A |
| 5 | BICF2S2367907          | 86435708 | G | 0.25 | 0.2857 | A |
| 5 | BICF2P483162           | 86441914 | G | 0.25 | 0.2143 | A |
| 5 | TIGRP2P75599_rs9087741 | 86448262 | A | 0.25 | 0.4286 | C |
| 5 | TIGRP2P75602_rs9096339 | 86450459 | T | 0.5  | 0.7143 | A |
| 5 | BICF2P384915           | 86450846 | G | 0.5  | 0.7143 | C |
| 5 | TIGRP2P75612_rs9146001 | 86462325 | A | 0.25 | 0.2143 | G |
| 5 | BICF2P863234           | 86475139 | A | 0    | 0      | G |
| 5 | BICF2P1156675          | 86495848 | A | 0    | 0      | G |
| 5 | BICF2S23523955         | 86507967 | A | 0    | 0      | G |
| 5 | TIGRP2P75650_rs8701340 | 86524326 | G | 0    | 0      | A |
| 5 | TIGRP2P75660_rs8750031 | 86536219 | A | 0    | 0      | G |
| 5 | BICF2P261920           | 86562417 | G | 0.5  | 0.5    | A |
| 5 | BICF2P624118           | 86576991 | A | 0.5  | 0.2857 | G |
| 5 | TIGRP2P75694_rs8595883 | 86591098 | A | 0.25 | 0.2143 | G |
| 5 | BICF2P1061801          | 86595707 | G | 0.25 | 0.2143 | A |
| 5 | BICF2P1458217          | 86602038 | A | 0.25 | 0.2143 | G |
| 5 | BICF2P939474           | 86610635 | G | 0.25 | 0.2143 | A |
| 5 | BICF2S23215977         | 86619155 | A | 0.25 | 0.2143 | G |
| 5 | BICF2S23255587         | 86632065 | G | 0.75 | 0.5    | A |
| 5 | BICF2P422753           | 86645984 | G | 0    | 0      | A |
| 5 | TIGRP2P75735_rs9121017 | 86660306 | G | 0    | 0      | C |
| 5 | BICF2P323747           | 86660476 | A | 0    | 0      | C |
| 5 | BICF2S23653213         | 86671254 | C | 0    | 0      | A |
| 5 | TIGRP2P75745_rs9145499 | 86675574 | A | 0    | 0      | G |
| 5 | TIGRP2P75750_rs9137076 | 86691606 | O | 0    | 0      | A |
| 5 | TIGRP2P75758_rs8645281 | 86699227 | A | 0.5  | 0.5    | G |
| 5 | BICF2P1246439          | 86699305 | A | 0.5  | 0.5    | G |

|   |                        |          |   |      |        |   |
|---|------------------------|----------|---|------|--------|---|
| 5 | BICF2P864300           | 86713228 | A | 0.5  | 0.5    | T |
| 5 | TIGRP2P75766_rs8863139 | 86713339 | A | 0    | 0      | C |
| 5 | BICF2P816538           | 86727703 | A | 0.5  | 0.5    | G |
| 5 | BICF2P1387924          | 86737059 | G | 0.25 | 0.2143 | A |
| 5 | BICF2P1387923          | 86737371 | G | 0.25 | 0.2143 | A |
| 5 | BICF2P1415480          | 86753439 | A | 0    | 0      | T |
| 5 | BICF2S2438527          | 86757007 | A | 0    | 0      | T |
| 5 | BICF2P1123931          | 86776998 | A | 0.5  | 0.5    | G |
| 5 | TIGRP2P75806_rs8952823 | 86779921 | G | 0.5  | 0.5    | A |
| 5 | BICF2P1089267          | 86800985 | C | 0.5  | 0.2857 | A |
| 5 | BICF2P417824           | 86819421 | A | 0.25 | 0.2143 | G |
| 5 | BICF2P1290104          | 86827216 | C | 0.25 | 0.5    | A |
| 5 | TIGRP2P75827_rs8745485 | 86829380 | A | 0.25 | 0.5    | G |
| 5 | BICF2P1072073          | 86838640 | G | 0    | 0.2143 | A |
| 5 | BICF2P783496           | 86858380 | C | 0.75 | 0.7857 | G |
| 5 | BICF2P818669           | 86868598 | C | 0.75 | 0.7857 | G |
| 5 | BICF2S23742584         | 86872045 | C | 0    | 0.2143 | A |
| 5 | BICF2P1095202          | 86889699 | A | 0    | 0      | G |
| 5 | BICF2P1274665          | 86900422 | A | 0    | 0      | G |
| 5 | TIGRP2P75869_rs9032805 | 86907986 | A | 0.25 | 0.2143 | G |
| 5 | TIGRP2P75877_rs8968176 | 86924742 | A | 0.75 | 0.7857 | G |
| 5 | BICF2S23520343         | 86934701 | G | 0    | 0      | A |
| 5 | BICF2P1116920          | 86954697 | G | 0    | 0      | A |
| 5 | BICF2P343569           | 86963846 | A | 0    | 0      | G |
| 5 | BICF2P1399181          | 86977946 | C | 0    | 0      | A |
| 5 | TIGRP2P75902_rs8767464 | 86994177 | A | 0.75 | 0.7857 | G |
| 5 | BICF2P89504            | 87000116 | G | 0    | 0      | A |
| 5 | BICF2S23650081         | 87019597 | A | 0.25 | 0.2143 | G |
| 5 | BICF2S23416687         | 87020973 | A | 0    | 0      | G |
| 5 | BICF2P324794           | 87042175 | C | 0.25 | 0.2143 | A |
| 5 | BICF2P354004           | 87050035 | G | 0    | 0      | A |
| 5 | TIGRP2P75924_rs8778915 | 87060899 | A | 0    | 0      | G |
| 5 | BICF2P647562           | 87069941 | A | 0.25 | 0.25   | G |
| 5 | BICF2S23022328         | 87078778 | G | 0.75 | 0.7857 | A |
| 5 | BICF2S23212617         | 87102163 | A | 0    | 0      | G |
| 5 | BICF2S22918307         | 87122840 | A | 0    | 0      | G |
| 5 | BICF2S23055285         | 87124780 | G | 0.75 | 0.5714 | A |
| 5 | BICF2S23540792         | 87144379 | A | 0.25 | 0.4286 | G |
| 5 | BICF2P522936           | 87150183 | G | 0.5  | 0.6    | A |
| 5 | BICF2S2337403          | 87184328 | G | 0    | 0      | A |
| 5 | BICF2P693020           | 87197023 | A | 0.25 | 0.4286 | C |
| 5 | BICF2P537835           | 87206783 | G | 0.25 | 0.4286 | A |
| 5 | BICF2S23040766         | 87220748 | A | 0    | 0      | G |
| 5 | BICF2S23141092         | 87236953 | A | 0    | 0      | G |
| 5 | BICF2P1037886          | 87247634 | G | 0    | 0      | A |
| 5 | BICF2S23018396         | 87260069 | G | 0    | 0      | A |
| 5 | BICF2P726333           | 87262702 | A | 0    | 0      | C |

|   |                        |          |   |      |        |   |
|---|------------------------|----------|---|------|--------|---|
| 5 | BICF2S229500           | 87278670 | G | 0.75 | 0.5714 | A |
| 5 | BICF2P784360           | 87292070 | A | 0.25 | 0.4286 | C |
| 5 | BICF2P68576            | 87308901 | A | 1    | 1      | G |
| 5 | BICF2S23261228         | 87340681 | A | 0    | 0      | G |
| 5 | TIGRP2P75939_rs8744537 | 87343904 | 0 | 0    | 0      | G |
| 5 | BICF2P957315           | 87359213 | G | 0.25 | 0.4286 | A |
| 5 | BICF2S2353613          | 87377340 | A | 0    | 0      | G |
| 5 | BICF2S2296814          | 87391274 | A | 0    | 0      | G |
| 5 | BICF2P501577           | 87402296 | G | 0.75 | 0.5714 | A |
| 5 | BICF2S23627302         | 87418607 | A | 0    | 0      | T |
| 5 | BICF2S23626438         | 87423344 | A | 0.25 | 0.4286 | G |
| 5 | BICF2P556328           | 87437551 | A | 0    | 0      | T |
| 5 | BICF2S23416041         | 87480088 | G | 0    | 0.2143 | A |
| 5 | BICF2S23422111         | 87495103 | G | 0    | 0.1667 | A |
| 5 | BICF2S23659598         | 87512139 | G | 0    | 0      | A |
| 5 | BICF2S23658946         | 87516903 | A | 0    | 0      | C |
| 5 | BICF2P227682           | 87536170 | A | 0.25 | 0.2143 | G |
| 5 | BICF2P1278635          | 87543512 | A | 0.75 | 0.5714 | G |
| 5 | TIGRP2P75941_rs8964137 | 87551918 | 0 | 0    | 0      | A |
| 5 | BICF2S2457188          | 87562095 | 0 | 0    | 0      | A |
| 5 | BICF2P822638           | 87581787 | C | 0    | 0      | A |
| 5 | BICF2P280791           | 87584091 | A | 0    | 0      | C |
| 5 | BICF2P600816           | 87598870 | 0 | 0    | 0      | A |
| 5 | BICF2S23147066         | 87613340 | A | 0    | 0      | G |
| 5 | BICF2S23034491         | 87632274 | G | 0.5  | 0.2857 | A |
| 5 | BICF2P1333910          | 87644802 | G | 0.25 | 0.2143 | A |
| 5 | BICF2P251004           | 87654938 | G | 0.75 | 0.5833 | A |
| 5 | BICF2P1242649          | 87664661 | A | 0.5  | 0.5    | C |
| 5 | BICF2S23549124         | 87677582 | G | 0.5  | 0.5833 | A |
| 5 | BICF2P1276772          | 87688322 | A | 0    | 0      | T |
| 5 | BICF2P774451           | 87702471 | A | 0    | 0      | G |
| 5 | BICF2P1494170          | 87713738 | 0 | 0    | 0      | G |
| 5 | BICF2P965216           | 87725404 | 0 | 0    | 0      | A |
| 5 | BICF2P1059699          | 87741405 | A | 0    | 0      | G |
| 5 | BICF2P1310593          | 87745364 | 0 | 0    | 0      | G |
| 5 | TIGRP2P75960_rs8738319 | 87759280 | A | 0.5  | 0.2857 | C |
| 5 | TIGRP2P75970_rs8603400 | 87777661 | A | 0.25 | 0.2857 | G |
| 5 | BICF2P1310468          | 87780446 | G | 0.25 | 0.2857 | A |
| 5 | BICF2P195967           | 87822280 | A | 0.75 | 0.7857 | G |
| 5 | BICF2P819923           | 87827494 | G | 0    | 0      | A |
| 5 | BICF2P557573           | 87843405 | G | 0.25 | 0.2143 | A |
| 5 | BICF2S23247013         | 87862086 | A | 0.5  | 0.25   | G |
| 5 | BICF2P186489           | 87875616 | 0 | 0    | 0      | A |
| 5 | BICF2P728701           | 87890116 | A | 0.25 | 0.2143 | G |
| 5 | BICF2P979227           | 87897065 | G | 0.75 | 0.5    | A |
| 5 | TIGRP2P76018_rs9160263 | 87908157 | G | 0.25 | 0.5    | A |
| 5 | TIGRP2P76031_rs8810392 | 87923699 | A | 0.75 | 0.5    | G |

|   |                        |          |   |      |        |   |
|---|------------------------|----------|---|------|--------|---|
| 5 | BICF2P119318           | 87933432 | G | 0.25 | 0.2143 | A |
| 5 | BICF2P420159           | 87942662 | A | 0    | 0      | G |
| 5 | BICF2P124934           | 87957290 | A | 0    | 0      | G |
| 5 | BICF2P209565           | 87964742 | A | 0.5  | 0.2857 | G |
| 5 | BICF2P301512           | 87975292 | G | 0.5  | 0.2857 | A |
| 5 | TIGRP2P76070_rs9123791 | 87999968 | A | 0    | 0      | G |
| 5 | BICF2S23451432         | 88012999 | C | 0    | 0      | A |
| 5 | BICF2P867787           | 88030262 | G | 0.75 | 0.5714 | A |
| 5 | BICF2P1273720          | 88040212 | G | 0    | 0      | A |
| 5 | BICF2P942522           | 88049850 | A | 0    | 0      | G |
| 5 | BICF2P1138003          | 88067104 | A | 0.75 | 0.5    | G |
| 5 | BICF2P1313425          | 88074382 | G | 0    | 0      | A |
| 5 | TIGRP2P76110_rs9188353 | 88087097 | A | 0    | 0.2143 | G |
| 5 | TIGRP2P76127_rs8951329 | 88101586 | A | 0    | 0.2143 | G |
| 5 | BICF2P567309           | 88120720 | A | 0    | 0      | G |
| 5 | BICF2P373082           | 88135665 | C | 0.75 | 0.5714 | A |
| 5 | TIGRP2P76146_rs8893155 | 88136922 | 0 | 0    | 0      | G |
| 5 | BICF2P296031           | 88148138 | G | 1    | 0.6    | A |
| 5 | BICF2P352788           | 88161794 | A | 0    | 0.2143 | G |
| 5 | BICF2P566038           | 88181594 | 0 | 0    | 0      | G |
| 5 | BICF2S2307115          | 88184606 | G | 0.5  | 0.5    | A |
| 5 | BICF2S23027879         | 88200141 | G | 0.25 | 0.2143 | A |
| 5 | BICF2P286447           | 88205032 | A | NA   | 0.25   | G |
| 5 | BICF2P331153           | 88216706 | A | 0    | 0.2143 | G |
| 5 | BICF2P445542           | 88237425 | A | 0.25 | 0.2857 | G |
| 5 | BICF2P201358           | 88248588 | C | 0.25 | 0.5    | A |
| 5 | BICF2P1389721          | 88251884 | A | 0    | 0      | G |
| 5 | BICF2P1219736          | 88264347 | A | 0.25 | 0.2857 | G |
| 5 | BICF2S2333065          | 88275610 | G | 0    | 0.2143 | A |
| 5 | BICF2P734734           | 88307320 | A | 0.25 | 0.5    | G |
| 5 | BICF2P281057           | 88314595 | 0 | 0    | 0      | A |
| 5 | BICF2P657807           | 88320389 | A | 0.5  | 0.5    | G |
| 5 | TIGRP2P76184_rs9075053 | 88335968 | A | 0.5  | 0.5    | G |
| 5 | BICF2P414890           | 88343876 | A | 0    | 0.2143 | G |
| 5 | BICF2S23440885         | 88355979 | G | 0.5  | 0.7143 | A |
| 5 | BICF2P624954           | 88366858 | C | 0.5  | 0.2857 | A |
| 5 | BICF2P832065           | 88377861 | A | 0.5  | 0.2857 | G |
| 5 | BICF2P1258276          | 88397692 | A | 0    | 0      | G |
| 5 | TIGRP2P76229_rs9087303 | 88408221 | A | 0    | 0.2143 | G |
| 5 | BICF2S23256078         | 88427648 | G | NA   | NA     | A |
| 5 | TIGRP2P76281_rs8824292 | 88444970 | A | 0    | 0      | G |
| 5 | BICF2S23629284         | 88452146 | A | 1    | 0.7857 | G |
| 5 | BICF2P1346673          | 88458174 | A | 1    | 0.7857 | G |
| 5 | BICF2S23312942         | 88480992 | A | NA   | 0.5    | G |
| 5 | BICF2P611102           | 88501646 | A | 0    | 0.2143 | G |
| 5 | BICF2S23756076         | 88521440 | A | 0    | 0.2143 | C |
| 5 | BICF2P1335207          | 88527467 | A | 0    | 0.2143 | G |



|   |                        |          |   |   |        |   |
|---|------------------------|----------|---|---|--------|---|
| 5 | TIGRP2P76340_rs8725849 | 88548832 | A | 0 | 0.2143 | G |
| 5 | BICF2S23019786         | 88566093 | A | 0 | 0      | G |
| 5 | BICF2P1090240          | 88566611 | G | 0 | 0      | A |
| 5 | BICF2P293552           | 88580168 | A | 0 | 0      | C |
| 5 | BICF2S23443354         | 88587395 | A | 0 | 0      | G |
| 5 | TIGRP2P76367_rs8590070 | 88606809 | A | 0 | 0      | G |
| 5 | BICF2P106837           | 88612152 | A | 1 | 0.7857 | G |
| 5 | TIGRP2P76373_rs8981011 | 88625130 | A | 0 | 0      | C |
| 5 | TIGRP2P76374_rs9109328 | 88630771 | G | 0 | 0.2143 | A |
| 5 | BICF2S22953455         | 88643998 | A | 0 | 0      | G |
| 5 | BICF2P378711           | 88661681 | A | 0 | 0      | C |
| 5 | BICF2P569832           | 88666178 | G | 1 | 0.7857 | A |
| 5 | BICF2P1329997          | 88677981 | A | 1 | 0.7857 | G |
| 5 | BICF2P312287           | 88694403 | G | 1 | 0.7857 | A |
| 5 | BICF2S23755824         | 88704780 | G | 1 | 1      | A |
| 5 | BICF2S22941255         | 88727842 | A | 1 | 0.7857 | G |
| 5 | BICF2S22924846         | 88747513 | C | 1 | 0.7857 | A |
| 5 | BICF2P438108           | 88770412 | A | 1 | 0.7857 | C |
| 5 | BICF2P173743           | 88781621 | G | 0 | 0.2143 | A |
| 5 | BICF2P586787           | 88797730 | A | 1 | 0.7857 | C |
| 5 | BICF2P592280           | 88806390 | G | 1 | 0.7857 | A |
| 5 | BICF2S23710417         | 88816634 | C | 1 | 1      | A |
| 5 | BICF2P785182           | 88831014 | A | 0 | 0.2143 | G |
| 5 | BICF2P953115           | 88843019 | A | 0 | 0.2143 | G |
| 5 | BICF2P949081           | 88853335 | A | 0 | 0.2143 | C |
| 5 | BICF2P144978           | 88861985 | G | 0 | 0.2143 | A |
| 5 | TIGRP2P76420_rs9098097 | 88879168 | A | 0 | 0      | G |
| 5 | TIGRP2P76425_rs9126422 | 88885060 | A | 0 | 0      | G |
| 5 | BICF2P906344           | 88898756 | A | 1 | 1      | G |
| 5 | BICF2G630237833        | 88914881 | G | 1 | 0.7857 | A |
| 5 | BICF2G630237827        | 88919869 | G | 1 | 0.7857 | A |
| 5 | BICF2G630237804        | 88932546 | G | 1 | 0.7857 | A |
| 5 | TIGRP2P76436_rs8741083 | 88942672 | C | 0 | 0      | A |
| 5 | BICF2P1011813          | 88957579 | G | 1 | 0.7857 | A |
| 5 | BICF2S23759230         | 88968141 | G | 1 | 0.7857 | A |
| 5 | TIGRP2P76463_rs9080278 | 88978932 | G | 1 | 0.7857 | A |
| 5 | BICF2P399478           | 88996695 | A | 0 | 0      | G |
| 5 | BICF2P399479           | 88996895 | A | 1 | 0.7857 | G |
| 5 | BICF2P1278113          | 88999211 | C | 0 | 0.2143 | A |
| 5 | BICF2G630237730        | 89012083 | A | 1 | 0.7857 | C |
| 5 | BICF2P1236165          | 89031689 | A | 0 | 0      | G |
| 5 | BICF2P596593           | 89051311 | G | 1 | 1      | A |
| 5 | BICF2G630237698        | 89063277 | G | 0 | 0      | A |
| 5 | BICF2G630237686        | 89068107 | A | 0 | 0      | C |
| 5 | BICF2P1336702          | 89079980 | A | 0 | 0      | G |
| 5 | BICF2S2336655          | 89092415 | A | 0 | 0      | C |
| 5 | BICF2P1028369          | 89104729 | G | 0 | 0      | A |

|   |                        |          |   |   |        |   |
|---|------------------------|----------|---|---|--------|---|
| 5 | TIGRP2P76520_rs9181607 | 89124163 | A | 0 | 0      | G |
| 5 | BICF2P779183           | 89132355 | A | 1 | 0.7857 | G |
| 5 | TIGRP2P76529_rs9133954 | 89137039 | A | 0 | 0      | G |
| 5 | BICF2G630237639        | 89159442 | G | 0 | 0.2143 | A |
| 5 | TIGRP2P76540_rs8802141 | 89161462 | A | 0 | 0      | G |
| 5 | BICF2G630237633        | 89171520 | A | 1 | 1      | T |
| 5 | BICF2G630237611        | 89182742 | G | 1 | 1      | A |
| 5 | BICF2G630237608        | 89205232 | A | 0 | 0      | G |
| 5 | BICF2P439727           | 89219464 | A | 0 | 0      | G |
| 5 | BICF2G630237568        | 89219710 | A | 0 | 0      | G |
| 5 | BICF2G630237539        | 89234894 | G | 0 | 0      | A |
| 5 | BICF2G630237514        | 89243493 | A | 0 | 0      | C |
| 5 | BICF2G630237513        | 89243879 | A | 0 | 0      | T |
| 5 | BICF2G630237500        | 89256535 | G | 0 | 0      | A |
| 5 | BICF2P765879           | 89265727 | G | 0 | 0.2143 | A |
| 5 | BICF2P1367382          | 89284578 | A | 0 | 0      | C |
| 5 | BICF2S23331483         | 89287093 | A | 0 | 0      | C |
| 5 | BICF2G630237460        | 89303504 | A | 0 | 0      | C |
| 5 | BICF2G630237438        | 89315218 | G | 0 | 0      | A |
| 5 | BICF2S23347621         | 89320929 | T | 0 | 0      | A |
| 5 | BICF2P546692           | 89334048 | A | 0 | 0      | G |
| 5 | BICF2P1035247          | 89347811 | G | 0 | 0      | A |
| 5 | TIGRP2P76614_rs8873562 | 89358810 | A | 1 | 0.7857 | G |
| 5 | BICF2P274245           | 89373546 | A | 0 | 0.2143 | G |
| 5 | BICF2G630237378        | 89382833 | G | 1 | 0.7857 | A |
| 5 | BICF2G630237373        | 89392963 | A | 0 | 0      | G |
| 5 | BICF2G630237344        | 89407629 | A | 0 | 0      | G |
| 5 | BICF2G630237338        | 89409097 | G | 0 | 0      | A |
| 5 | BICF2S23541564         | 89412946 | 0 | 0 | 0      | G |
| 5 | BICF2G630237307        | 89424540 | G | 0 | 0      | A |
| 5 | BICF2S23738413         | 89454416 | G | 0 | 0      | A |
| 5 | BICF2G630237292        | 89459387 | 0 | 0 | 0      | G |
| 5 | BICF2G630237244        | 89478560 | G | 0 | 0      | A |
| 5 | BICF2G630237241        | 89479766 | T | 0 | 0      | A |
| 5 | BICF2S23332793         | 89489917 | C | 0 | 0      | A |
| 5 | BICF2G630237233        | 89491611 | G | 0 | 0      | A |
| 5 | BICF2P920412           | 89493962 | 0 | 0 | 0      | G |
| 5 | BICF2G630237207        | 89508041 | G | 0 | 0.2143 | A |
| 5 | BICF2G630237191        | 89515754 | A | 0 | 0      | T |
| 5 | BICF2G630237188        | 89525643 | A | 0 | 0      | G |
| 5 | BICF2P850257           | 89528706 | G | 0 | 0      | C |
| 5 | BICF2P324887           | 89549303 | C | 0 | 0      | A |
| 5 | BICF2S23621878         | 89570889 | A | 0 | 0      | G |
| 5 | BICF2G630237153        | 89577861 | G | 0 | 0      | A |
| 5 | BICF2G630237128        | 89591708 | A | 1 | 1      | G |
| 5 | BICF2S232285           | 89596695 | A | 0 | 0      | G |
| 5 | BICF2G630237105        | 89608146 | A | 0 | 0      | G |

|   |                        |          |   |   |        |   |
|---|------------------------|----------|---|---|--------|---|
| 5 | BICF2G630237085        | 89626964 | G | 0 | 0      | A |
| 5 | BICF2G630237046        | 89645148 | A | 1 | 0.7857 | G |
| 5 | BICF2P521928           | 89658572 | C | 1 | 1      | A |
| 5 | BICF2P807704           | 89671556 | G | 1 | 1      | A |
| 5 | BICF2S23344251         | 89689742 | G | 0 | 0      | A |
| 5 | BICF2G630237037        | 89712046 | 0 | 0 | 0      | A |
| 5 | BICF2P1273185          | 89731752 | A | 0 | 0      | G |
| 5 | BICF2G630237036        | 89740681 | A | 0 | 0      | G |
| 5 | BICF2G630237034        | 89746207 | G | 0 | 0.2143 | A |
| 5 | BICF2G630237033        | 89746787 | G | 0 | 0.2143 | A |
| 5 | BICF2G630237018        | 89761894 | C | 0 | 0      | A |
| 5 | BICF2G630236994        | 89772592 | A | 0 | 0      | G |
| 5 | BICF2G630236979        | 89782003 | A | 0 | 0.2143 | C |
| 5 | TIGRP2P76720_rs8988781 | 89802931 | 0 | 0 | 0      | C |
| 5 | BICF2P1491931          | 89808608 | A | 1 | 0.7857 | G |
| 5 | BICF2G630236945        | 89817604 | A | 0 | 0      | G |
| 5 | BICF2S23353766         | 89829408 | A | 0 | 0.2143 | G |
| 5 | BICF2S23720320         | 89838858 | A | 1 | 0.7857 | G |
| 5 | BICF2S23524513         | 89850637 | G | 0 | 0.2143 | A |
| 5 | BICF2P863931           | 89853750 | T | 1 | 0.7857 | A |
| 5 | TIGRP2P76725_rs8624135 | 89863328 | 0 | 0 | 0      | G |
| 5 | BICF2G630236901        | 89875344 | A | 0 | 0      | G |
| 5 | BICF2G630236868        | 89885180 | G | 0 | 0      | A |
| 5 | BICF2G630236867        | 89885784 | C | 0 | 0      | A |
| 5 | BICF2G630236819        | 89904868 | G | 0 | 0      | A |
| 5 | BICF2G630236807        | 89907161 | A | 0 | 0      | G |
| 5 | BICF2P136844           | 89926072 | A | 0 | 0      | G |
| 5 | BICF2S23159247         | 89930397 | A | 0 | 0      | G |
| 5 | BICF2G630236750        | 89942584 | A | 1 | 1      | G |
| 5 | BICF2P1061199          | 89957289 | A | 0 | 0      | G |
| 5 | BICF2G630236738        | 89965070 | A | 0 | 0      | G |
| 5 | BICF2P308118           | 89977342 | A | 0 | 0.2143 | G |
| 5 | BICF2G630236694        | 89989747 | A | 1 | 1      | G |
| 5 | BICF2G630236653        | 90000572 | A | 0 | 0      | G |
| 5 | BICF2P546360           | 90021344 | A | 1 | 0.7857 | G |
| 5 | BICF2G630236621        | 90026301 | G | 0 | 0      | A |
| 5 | BICF2G630236596        | 90035404 | G | 1 | 0.7857 | A |
| 5 | BICF2S23443788         | 90060772 | C | 1 | 0.7857 | A |
| 5 | BICF2S23760858         | 90072280 | C | 1 | 0.7857 | A |
| 5 | BICF2P103105           | 90087577 | 0 | 0 | 0      | G |
| 5 | BICF2G630236529        | 90112725 | A | 0 | 0      | G |
| 5 | BICF2G630236519        | 90122139 | C | 0 | 0      | A |
| 5 | BICF2G630236507        | 90126984 | A | 0 | 0      | C |
| 5 | BICF2S229290           | 90139777 | G | 0 | 0.2143 | A |
| 5 | BICF2P808123           | 90157109 | G | 0 | 0      | A |
| 5 | BICF2G630236470        | 90163881 | G | 0 | 0      | A |
| 5 | BICF2P1008799          | 90176516 | G | 0 | 0      | A |

|   |                        |          |   |   |        |   |
|---|------------------------|----------|---|---|--------|---|
| 5 | BICF2P938020           | 90200224 | A | 0 | 0.2143 | G |
| 5 | BICF2G630236411        | 90209170 | A | 0 | 0.1667 | G |
| 5 | BICF2G630236401        | 90220289 | G | 0 | 0      | A |
| 5 | BICF2G630236389        | 90236384 | G | 0 | 0.2143 | A |
| 5 | BICF2P1178443          | 90241480 | G | 0 | 0      | A |
| 5 | BICF2G630236379        | 90252019 | C | 0 | 0      | A |
| 5 | BICF2P697194           | 90267315 | G | 1 | 0.7857 | A |
| 5 | BICF2G630236350        | 90283538 | A | 0 | 0      | G |
| 5 | BICF2G630236310        | 90293896 | A | 0 | 0      | G |
| 5 | BICF2G630236297        | 90304012 | A | 0 | 0      | G |
| 5 | BICF2S23410386         | 90314778 | A | 0 | 0      | G |
| 5 | BICF2G630236279        | 90327247 | G | 0 | 0      | A |
| 5 | BICF2P1333832          | 90348856 | G | 1 | 0.7857 | A |
| 5 | BICF2S22914308         | 90357833 | A | 0 | 0      | G |
| 5 | BICF2P1434787          | 90369858 | A | 0 | 0      | C |
| 5 | BICF2P187684           | 90372009 | A | 1 | 0.8333 | G |
| 5 | BICF2G630236215        | 90379296 | G | 0 | 0      | A |
| 5 | TIGRP2P76791_rs8653865 | 90392252 | A | 1 | 1      | G |
| 5 | TIGRP2P76804_rs9164669 | 90412656 | A | 0 | 0.2143 | G |
| 5 | BICF2P1141923          | 90418770 | 0 | 0 | 0      | G |
| 5 | TIGRP2P76807_rs8731763 | 90424910 | A | 0 | 0      | G |
| 5 | TIGRP2P76811_rs8705133 | 90440698 | G | 0 | 0.2143 | A |
| 5 | BICF2G630236171        | 90455482 | C | 0 | 0.2143 | A |
| 5 | BICF2G630236161        | 90462767 | G | 0 | 0      | A |
| 5 | TIGRP2P76827_rs9121943 | 90470968 | 0 | 0 | 0      | G |
| 5 | BICF2G630236127        | 90492472 | A | 0 | 0      | C |
| 5 | BICF2G630236116        | 90499713 | C | 0 | 0      | A |
| 5 | BICF2P975291           | 90511325 | C | 1 | 1      | A |
| 5 | BICF2G630236082        | 90517537 | G | 0 | 0      | A |
| 5 | BICF2P1131625          | 90534847 | G | 1 | 0.7857 | C |
| 5 | BICF2G630236036        | 90540185 | A | 0 | 0      | C |
| 5 | BICF2P1036138          | 90559706 | A | 0 | 0      | G |
| 5 | BICF2G630235980        | 90574089 | G | 1 | 0.7857 | A |
| 5 | BICF2G630235957        | 90586872 | G | 0 | 0.2143 | A |
| 5 | BICF2G630235910        | 90597168 | A | 0 | 0.2143 | G |
| 5 | BICF2G630235890        | 90609781 | C | 0 | 0.2143 | A |
| 5 | TIGRP2P76894_rs8697907 | 90623766 | A | 1 | 0.7857 | G |
| 5 | BICF2S23520348         | 90640246 | A | 1 | 1      | G |
| 5 | BICF2G630235783        | 90669729 | G | 0 | 0      | A |
| 5 | BICF2S2313329          | 90679523 | 0 | 0 | 0      | G |
| 5 | BICF2G630235756        | 90692217 | A | 0 | 0.2143 | G |
| 5 | BICF2G630235743        | 90700841 | G | 0 | 0.2143 | A |
| 5 | BICF2P72255            | 90712702 | A | 0 | 0      | G |
| 5 | BICF2G630235670        | 90732242 | G | 0 | 0      | A |
| 5 | BICF2G630235669        | 90739878 | A | 0 | 0.2143 | G |
| 5 | BICF2P1299170          | 90740011 | G | 1 | 0.7857 | A |
| 5 | BICF2P322652           | 90754689 | G | 0 | 0      | A |

|   |                        |          |   |      |        |   |
|---|------------------------|----------|---|------|--------|---|
| 5 | BICF2G630235651        | 90754943 | G | 0    | 0      | A |
| 5 | BICF2G630235647        | 90762714 | A | 0    | 0      | G |
| 5 | BICF2G630235604        | 90783046 | A | 0    | 0      | G |
| 5 | BICF2G630235595        | 90798208 | A | 0    | 0      | G |
| 5 | BICF2G630235554        | 90823836 | G | 0    | 0      | A |
| 5 | BICF2G630235524        | 90832313 | G | 0    | 0      | A |
| 5 | BICF2S2303333          | 90847234 | C | 0    | 0.2143 | A |
| 5 | BICF2G630235498        | 90855474 | A | 1    | 0.7857 | C |
| 5 | BICF2G630235488        | 90865436 | A | 0    | 0      | T |
| 5 | BICF2G630235472        | 90872715 | C | 0    | 0      | G |
| 5 | BICF2P662460           | 90874086 | G | 1    | 0.7857 | A |
| 5 | BICF2P151720           | 90891935 | A | 0    | 0.2143 | G |
| 5 | BICF2S22922517         | 90894031 | G | 0    | 0      | A |
| 5 | TIGRP2P77011_rs8753364 | 90898048 | A | 1    | 0.7857 | C |
| 5 | BICF2G630235419        | 90908018 | A | 1    | 0.7857 | C |
| 5 | BICF2G630235405        | 90919209 | G | 1    | 1      | C |
| 5 | BICF2S23645691         | 90932953 | A | 0    | 0      | G |
| 5 | BICF2G630235398        | 90942205 | A | 1    | 0.7857 | G |
| 5 | BICF2G630235381        | 90956816 | G | 0    | 0      | A |
| 5 | BICF2G630235341        | 90976043 | G | 1    | 1      | A |
| 5 | TIGRP2P77032_rs8975548 | 90986661 | G | 0    | 0      | A |
| 5 | BICF2G630235288        | 91003652 | G | 1    | 0.7857 | A |
| 5 | BICF2G630235282        | 91009061 | G | 0    | 0.2143 | A |
| 5 | BICF2G630235264        | 91012391 | C | 0    | 0.2143 | A |
| 5 | BICF2P1409689          | 91023273 | A | 0    | 0.2143 | G |
| 5 | BICF2P190084           | 91038224 | G | 0    | 0      | A |
| 5 | TIGRP2P77071_rs9152979 | 91046110 | G | 0.25 | 0.2857 | A |
| 5 | BICF2P1165456          | 91058091 | A | 0    | 0.2143 | G |
| 5 | BICF2P1138622          | 91071345 | A | 0    | 0      | G |
| 5 | BICF2P597043           | 91084936 | A | 0    | 0.2143 | G |
| 5 | BICF2P628486           | 91094861 | C | 0    | 0      | A |
| 5 | TIGRP2P77083_rs9025204 | 91103068 | G | 0.25 | 0.5    | A |
| 5 | BICF2P171915           | 91115257 | G | 0    | 0      | A |
| 5 | BICF2P699067           | 91131687 | A | 0.75 | 0.5    | G |
| 5 | BICF2P1206590          | 91146127 | G | 0.75 | 0.7143 | A |
| 5 | BICF2S23247077         | 91149775 | G | 0.75 | 0.7143 | A |
| 5 | BICF2P1115610          | 91163168 | A | 0    | 0      | C |
| 5 | BICF2P940164           | 91168960 | A | 0.25 | 0.2857 | G |
| 5 | BICF2P35852            | 91173383 | A | 0.75 | 0.5    | G |
| 5 | BICF2P1223969          | 91190854 | A | 0.25 | 0.5    | G |
| 5 | TIGRP2P77132_rs8686166 | 91213843 | A | 0    | 0      | G |
| 5 | BICF2P159734           | 91225092 | C | 0.75 | 0.5    | A |
| 5 | BICF2P4386             | 91230445 | 0 | 0    | 0      | G |
| 5 | TIGRP2P77153_rs8839493 | 91241014 | A | 0    | 0      | G |
| 5 | BICF2P705297           | 91260508 | C | 0    | 0.2143 | A |
| 5 | BICF2P454083           | 91269384 | A | 0    | 0.2143 | G |
| 5 | BICF2S22931980         | 91280774 | A | 0.75 | 0.5    | G |

|   |                         |          |   |      |        |   |
|---|-------------------------|----------|---|------|--------|---|
| 5 | BICF2S23250722          | 91288207 | G | 0.75 | 0.5    | A |
| 5 | BICF2P568220            | 91302417 | A | 0    | 0.2143 | G |
| 5 | TIGRP2P771169_rs8577749 | 91319951 | A | 0    | 0      | G |
| 5 | TIGRP2P771170_rs9137174 | 91321670 | G | 0    | 0      | A |
| 5 | TIGRP2P771173_rs9041258 | 91333254 | A | 0.75 | 0.7143 | C |
| 5 | BICF2P488860            | 91341721 | G | 0.25 | 0.2857 | A |
| 5 | BICF2P1094808           | 91366572 | G | 0    | 0      | A |
| 5 | BICF2P728227            | 91398593 | C | 0.25 | 0.2857 | A |
| 5 | BICF2P417303            | 91406200 | G | 0    | 0      | A |
| 5 | BICF2S23519839          | 91416768 | C | 0.25 | 0.5    | A |
| 5 | BICF2P770863            | 91434888 | A | 0    | 0      | G |
| 5 | BICF2P1112603           | 91444017 | A | 0.25 | 0.5    | G |
| 5 | BICF2P745624            | 91449056 | A | 0.25 | 0.5    | G |
| 5 | BICF2P411375            | 91462125 | A | 0    | 0      | G |
| 5 | BICF2P692485            | 91480005 | A | 0    | 0      | G |
| 5 | BICF2P833190            | 91485997 | A | 0    | 0      | G |
| 5 | BICF2P273921            | 91503697 | C | 0    | 0      | G |
| 5 | BICF2P1111967           | 91510734 | G | 0.25 | 0.2857 | A |
| 5 | BICF2S22948100          | 91528176 | G | 0    | 0      | A |
| 5 | BICF2S22947542          | 91532350 | A | 0.75 | 0.5    | G |
| 5 | BICF2S23544580          | 91545451 | A | 0    | 0      | G |
| 5 | BICF2P1143605           | 91571096 | C | 0    | 0.2143 | A |
| 5 | BICF2P675434            | 91579355 | A | 0    | 0      | G |
| 5 | BICF2S23421987          | 91594916 | A | 0    | 0.2143 | G |
| 5 | BICF2P1470416           | 91597942 | A | 0.25 | 0.2857 | G |
| 5 | BICF2S22925959          | 91610503 | A | NA   | NA     | G |
| 5 | BICF2P1038512           | 91631297 | G | 0.25 | 0.2857 | A |
| 5 | BICF2P678717            | 91632586 | G | 1    | 1      | A |
| 5 | BICF2P758545            | 91644658 | A | 0    | 0      | G |
| 5 | BICF2P690475            | 91656414 | A | 0    | 0      | G |
| 5 | BICF2S23535576          | 91675810 | A | 0    | 0      | G |
| 5 | BICF2P265693            | 91683708 | 0 | 0    | 0      | A |
| 5 | BICF2P1280324           | 91704331 | A | 0.25 | 0.2857 | G |
| 5 | BICF2P568401            | 91719035 | A | 0    | 0.2143 | G |
| 5 | BICF2P587295            | 91734464 | A | 0.75 | 0.7143 | G |
| 5 | BICF2P827737            | 91738036 | C | 0.25 | 0.2857 | A |
| 5 | BICF2P739108            | 91752189 | A | 0.75 | 0.7143 | G |
| 5 | BICF2P307276            | 91760591 | A | 0.75 | 0.7143 | G |
| 5 | BICF2S24411815          | 91774080 | C | 0.25 | 0.2857 | A |
| 5 | BICF2S23213551          | 91784522 | A | 0.25 | 0.2857 | G |
| 5 | BICF2P605427            | 91811939 | G | 0.75 | 0.5    | A |
| 5 | BICF2P1103859           | 91819292 | A | 0.25 | 0.5    | C |
| 5 | BICF2S23311810          | 91838553 | C | 1    | 1      | A |
| 5 | BICF2P616371            | 91842244 | G | 0    | 0      | A |
| 5 | BICF2P1106607           | 91850783 | A | 0    | 0      | G |
| 5 | BICF2S23420334          | 91863559 | G | 0    | 0      | A |
| 5 | BICF2P8576              | 91893912 | A | 0    | 0      | G |

|   |                        |          |   |      |        |   |
|---|------------------------|----------|---|------|--------|---|
| 5 | BICF2S23153948         | 91908518 | A | 0.75 | 0.7143 | G |
| 5 | BICF2S23529696         | 91928627 | A | 0    | 0      | C |
| 5 | BICF2P731256           | 91931258 | 0 | 0    | 0      | A |
| 5 | BICF2P798075           | 91969480 | C | 0    | 0      | G |
| 6 | BICF2G630807302        | 3048830  | 0 | 0    | 0      | G |
| 6 | BICF2S2452969          | 3084469  | 0 | 0    | 0      | G |
| 6 | BICF2G630807331        | 3098913  | 0 | 0    | 0      | A |
| 6 | TIGRP2P77241_rs9233066 | 3295041  | 0 | 0    | 0      | A |
| 6 | BICF2G630807407        | 3330209  | G | 1    | 0.3571 | A |
| 6 | TIGRP2P77250_rs9255272 | 3341099  | A | 0    | 0.2857 | G |
| 6 | BICF2P302182           | 3363625  | C | 1    | 0.3571 | G |
| 6 | G370f5S127             | 3425487  | G | 0    | 0      | A |
| 6 | G370f11S160            | 3441866  | 0 | 0    | 0      | C |
| 6 | BICF2G630807418        | 3457489  | G | 1    | 0.3571 | A |
| 6 | BICF2P364070           | 3462052  | C | 0    | 0.2857 | A |
| 6 | BICF2P75630            | 3487846  | A | 0    | 0      | G |
| 6 | BICF2P186459           | 3509745  | A | 0    | 0.2857 | G |
| 6 | BICF2P1234367          | 3575884  | 0 | 0    | 0      | C |
| 6 | BICF2G630807436        | 3580953  | G | 0    | 0      | A |
| 6 | BICF2G630807441        | 3590484  | 0 | 0    | 0      | G |
| 6 | BICF2P1416917          | 3601436  | A | 0    | 0      | G |
| 6 | BICF2P686276           | 3618974  | C | 0    | 0      | G |
| 6 | BICF2P764557           | 3645062  | A | 0    | 0.2857 | G |
| 6 | BICF2P1368662          | 3654288  | 0 | 0    | 0      | G |
| 6 | BICF2G630807461        | 3687451  | A | 0    | 0      | G |
| 6 | BICF2G630807462        | 3692623  | C | 0    | 0      | A |
| 6 | BICF2G630807466        | 3709700  | A | 0    | 0.3571 | C |
| 6 | BICF2G630807470        | 3728817  | A | 0    | 0.2857 | G |
| 6 | BICF2P1049684          | 3740764  | A | 0    | 0.2857 | C |
| 6 | BICF2S23221032         | 3742461  | A | 0    | 0.3571 | G |
| 6 | BICF2G630807476        | 3749300  | G | 0    | 0.3571 | A |
| 6 | BICF2G630807480        | 3767273  | A | 0    | 0.2857 | G |
| 6 | BICF2G630807482        | 3782237  | A | 0    | 0.2857 | G |
| 6 | BICF2G630807484        | 3807813  | A | 1    | 0.3571 | G |
| 6 | BICF2G630807495        | 3846545  | A | 0    | 0.3571 | G |
| 6 | TIGRP2P77302_rs8857434 | 3865999  | G | 0    | 0.2857 | A |
| 6 | BICF2G630807507        | 3885313  | A | 0    | 0.2857 | G |
| 6 | BICF2G630807509        | 3887416  | G | 0    | 0.2857 | A |
| 6 | BICF2G630807513        | 3905289  | G | 0    | 0.2857 | A |
| 6 | BICF2P511890           | 3911709  | 0 | 0    | 0      | A |
| 6 | BICF2P1048920          | 3942650  | G | 0    | 0.3571 | A |
| 6 | BICF2G630807522        | 3980304  | G | 0    | 0.2857 | C |
| 6 | G371f21S197            | 4032421  | 0 | 0    | 0      | G |
| 6 | BICF2P1165143          | 4056995  | 0 | 0    | 0      | A |
| 6 | BICF2G630807530        | 4071100  | A | 0    | 0      | G |
| 6 | BICF2P309937           | 4092736  | G | 0    | 0.3333 | A |
| 6 | BICF2P346677           | 4098786  | A | 0    | 0.3333 | G |

|   |                        |         |   |   |        |   |
|---|------------------------|---------|---|---|--------|---|
| 6 | BICF2G630807538        | 4105650 | 0 | 0 | 0      | G |
| 6 | BICF2G630807541        | 4133786 | 0 | 0 | 0      | G |
| 6 | BICF2P1005384          | 4147452 | 0 | 0 | 0      | A |
| 6 | BICF2G630807542        | 4155133 | A | 0 | 0.3571 | G |
| 6 | BICF2P1215893          | 4178961 | G | 0 | 0.3571 | A |
| 6 | BICF2G630807550        | 4190046 | G | 0 | 0.3571 | A |
| 6 | BICF2P1065106          | 4198108 | C | 0 | 0.3571 | A |
| 6 | TIGRP2P77316_rs9069415 | 4215043 | 0 | 0 | 0      | G |
| 6 | BICF2P1351136          | 4224712 | A | 0 | 0.3571 | G |
| 6 | BICF2G630807553        | 4238404 | 0 | 0 | 0      | A |
| 6 | BICF2P586728           | 4244796 | G | 0 | 0.3333 | A |
| 6 | BICF2G630807554        | 4256792 | 0 | 0 | 0      | C |
| 6 | BICF2P1198480          | 4275339 | G | 0 | 0.6429 | A |
| 6 | BICF2P869258           | 4281473 | 0 | 0 | 0      | A |
| 6 | BICF2G630807565        | 4290210 | G | 0 | 0      | A |
| 6 | BICF2G630807607        | 4341749 | C | 0 | 0.6429 | A |
| 6 | BICF2G630807614        | 4352128 | A | 0 | 0.6429 | G |
| 6 | BICF2G630807623        | 4362265 | A | 0 | 0.6429 | G |
| 6 | BICF2G630807631        | 4374013 | C | 0 | 0.6429 | A |
| 6 | BICF2G630807637        | 4382351 | G | 0 | 0.6429 | A |
| 6 | BICF2G630807650        | 4394855 | C | 0 | 0      | A |
| 6 | BICF2G630807659        | 4408303 | A | 0 | 0.6429 | G |
| 6 | BICF2P208106           | 4420632 | C | 0 | 0.6429 | A |
| 6 | BICF2G630807667        | 4432094 | C | 0 | 0.6429 | A |
| 6 | BICF2G630807676        | 4447220 | G | 0 | 0      | A |
| 6 | BICF2G630807688        | 4466160 | A | 0 | 0.6429 | G |
| 6 | BICF2P700648           | 4479706 | G | 0 | 0.6429 | A |
| 6 | BICF2G630807707        | 4485894 | G | 0 | 0.6429 | A |
| 6 | BICF2G630807718        | 4500852 | C | 0 | 0.6429 | A |
| 6 | BICF2P204085           | 4516539 | 0 | 0 | 0      | A |
| 6 | BICF2G630807744        | 4526933 | G | 0 | 0.6429 | A |
| 6 | BICF2G630807756        | 4538895 | C | 0 | 0      | A |
| 6 | BICF2S23659611         | 4547102 | A | 0 | 0.6429 | C |
| 6 | BICF2G630807768        | 4552881 | C | 1 | 1      | A |
| 6 | BICF2G630807771        | 4559777 | G | 0 | 0      | A |
| 6 | BICF2G630807774        | 4584641 | 0 | 0 | 0      | C |
| 6 | BICF2P160024           | 4589606 | 0 | 0 | 0      | G |
| 6 | TIGRP2P77335_rs8717909 | 4602387 | 0 | 0 | 0      | C |
| 6 | G372f27S33             | 4617743 | G | 1 | 1      | A |
| 6 | TIGRP2P77336_rs8620358 | 4640630 | 0 | 0 | 0      | C |
| 6 | G373f56S243            | 4683329 | G | 0 | 0.6429 | A |
| 6 | BICF2S2312684          | 4707777 | A | 0 | 0.6429 | G |
| 6 | BICF2S2313412          | 4739725 | G | 1 | 1      | A |
| 6 | BICF2P1304023          | 4756066 | 0 | 0 | 0      | A |
| 6 | BICF2S23350957         | 4770530 | A | 1 | 1      | G |
| 6 | BICF2S23335740         | 4792065 | A | 0 | 0.6429 | G |
| 6 | BICF2S23337456         | 4795578 | G | 1 | 1      | A |



|   |                        |         |   |   |        |   |
|---|------------------------|---------|---|---|--------|---|
| 6 | BICF2S23736139         | 4811198 | A | 1 | 1      | G |
| 6 | BICF2S23023616         | 4822328 | C | 1 | 1      | A |
| 6 | TIGRP2P77342_rs9228179 | 4840409 | 0 | 0 | 0      | A |
| 6 | BICF2S23133566         | 4844121 | G | 1 | 1      | A |
| 6 | BICF2P388710           | 4883081 | 0 | 0 | 0      | G |
| 6 | TIGRP2P77343_rs8588595 | 4908449 | 0 | 0 | 0      | A |
| 6 | TIGRP2P77345_rs8617758 | 4930165 | 0 | 0 | 0      | G |
| 6 | BICF2S2335528          | 4936366 | A | 1 | 1      | G |
| 6 | BICF2S23630642         | 4951931 | C | 1 | 1      | G |
| 6 | BICF2P234410           | 4962643 | 0 | 0 | 0      | A |
| 6 | BICF2S23661934         | 4970337 | G | 1 | 0.3571 | A |
| 6 | BICF2S23344691         | 4996791 | G | 1 | 1      | A |
| 6 | BICF2S23012633         | 5018141 | G | 0 | 0.6429 | A |
| 6 | BICF2S23061237         | 5041725 | C | 0 | 0.6429 | A |
| 6 | BICF2S23028626         | 5071386 | G | 1 | 1      | A |
| 6 | BICF2P104379           | 5075243 | 0 | 0 | 0      | G |
| 6 | BICF2G630807793        | 5107541 | A | 0 | 0      | G |
| 6 | BICF2G630807799        | 5126167 | 0 | 0 | 0      | G |
| 6 | BICF2P674590           | 5131197 | G | 1 | 1      | A |
| 6 | BICF2G630807819        | 5151644 | 0 | 0 | 0      | C |
| 6 | BICF2S23332716         | 5165742 | 0 | 0 | 0      | A |
| 6 | BICF2G630807851        | 5176582 | G | 1 | 1      | A |
| 6 | BICF2P923427           | 5191624 | 0 | 0 | 0      | A |
| 6 | BICF2G630807874        | 5205381 | A | 1 | 1      | C |
| 6 | BICF2G630807875        | 5205615 | G | 1 | 1      | A |
| 6 | BICF2P1128572          | 5211171 | 0 | 0 | 0      | G |
| 6 | BICF2G630807889        | 5224091 | G | 0 | 0.2857 | A |
| 6 | BICF2G630807891        | 5240929 | 0 | 0 | 0      | G |
| 6 | BICF2P538164           | 5249293 | 0 | 0 | 0      | A |
| 6 | BICF2P1399225          | 5258267 | 0 | 0 | 0      | A |
| 6 | G374f43S325            | 5282126 | 0 | 0 | 0      | A |
| 6 | BICF2G630807896        | 5311154 | A | 1 | 0.7143 | C |
| 6 | BICF2P879392           | 5319290 | 0 | 0 | 0      | A |
| 6 | BICF2G630807897        | 5327243 | 0 | 0 | 0      | A |
| 6 | BICF2G630807901        | 5337960 | 0 | 0 | 0      | A |
| 6 | TIGRP2P85299_rs8984073 | 5346888 | 0 | 0 | 0      | C |
| 6 | BICF2G630807902        | 5356035 | A | 1 | 0.7143 | G |
| 6 | BICF2G630807903        | 5369220 | 0 | 0 | 0      | A |
| 6 | BICF2P169873           | 5372611 | 0 | 0 | 0      | C |
| 6 | BICF2G630807904        | 5386786 | 0 | 0 | 0      | G |
| 6 | BICF2P1364421          | 5403969 | 0 | 0 | 0      | G |
| 6 | BICF2P1222717          | 5422740 | 0 | 0 | 0      | A |
| 6 | BICF2G630807909        | 5444016 | G | 1 | 0.7143 | A |
| 6 | BICF2G630807914        | 5465923 | 0 | 0 | 0      | G |
| 6 | BICF2G630807917        | 5476144 | A | 0 | 0.3571 | G |
| 6 | TIGRP2P85307_rs8662940 | 5492171 | 0 | 0 | 0      | A |
| 6 | BICF2S2342680          | 5508702 | A | 0 | 0      | G |

|   |                        |         |   |   |        |   |
|---|------------------------|---------|---|---|--------|---|
| 6 | BICF2P1060947          | 5528289 | 0 | 0 | 0      | G |
| 6 | TIGRP2P85310_rs9185345 | 5552948 | 0 | 0 | 0      | G |
| 6 | BICF2S2302533          | 5555696 | C | 0 | 0.6429 | A |
| 6 | BICF2S23156663         | 5572455 | G | 0 | 0.6429 | A |
| 6 | BICF2G630807928        | 5597988 | A | 0 | 0      | T |
| 6 | BICF2P1381769          | 5608401 | 0 | 0 | 0      | A |
| 6 | TIGRP2P85311_rs9195922 | 5619938 | G | 0 | 0      | A |
| 6 | BICF2P621026           | 5663568 | G | 0 | 0      | A |
| 6 | BICF2S2335197          | 5671106 | G | 0 | 0      | A |
| 6 | BICF2P632198           | 5686380 | 0 | 0 | 0      | G |
| 6 | TIGRP2P85315_rs8803473 | 5694610 | A | 0 | 0.2857 | G |
| 6 | BICF2S23224285         | 5704091 | G | 0 | 0      | A |
| 6 | BICF2P1433712          | 5721549 | G | 0 | 0      | A |
| 6 | BICF2P658867           | 5749209 | A | 0 | 0      | G |
| 6 | BICF2P342547           | 5754903 | A | 0 | 0      | G |
| 6 | BICF2P874933           | 5758133 | A | 0 | 0      | G |
| 6 | BICF2G630807938        | 5767336 | 0 | 0 | 0      | C |
| 6 | BICF2P922787           | 5770721 | G | 0 | 0      | A |
| 6 | BICF2P1005381          | 5779207 | A | 0 | 0      | G |
| 6 | BICF2P880946           | 5786349 | A | 0 | 0      | G |
| 6 | BICF2P1335911          | 5799020 | A | 0 | 0      | G |
| 6 | BICF2P790802           | 5810672 | A | 0 | 0      | G |
| 6 | BICF2P795577           | 5822572 | A | 0 | 0.6429 | G |
| 6 | BICF2P438014           | 5831638 | 0 | 0 | 0      | A |
| 6 | BICF2P939836           | 5843844 | T | 0 | 0      | A |
| 6 | BICF2P695305           | 5858924 | A | 0 | 0.2857 | G |
| 6 | BICF2P189516           | 5870138 | A | 0 | 0      | G |
| 6 | BICF2G630807941        | 5885076 | G | 1 | 0.7143 | A |
| 6 | BICF2P208674           | 5896276 | G | 1 | 0.7143 | A |
| 6 | BICF2P121934           | 5901586 | 0 | 0 | 0      | A |
| 6 | TIGRP2P85325_rs8639285 | 5911378 | G | 0 | 0      | A |
| 6 | BICF2G630807943        | 5930654 | G | 1 | 0.7143 | A |
| 6 | BICF2P900559           | 5943325 | G | 0 | 0      | A |
| 6 | BICF2G630807946        | 5948170 | C | 0 | 0      | A |
| 6 | BICF2G630807947        | 5962902 | A | 0 | 0      | G |
| 6 | TIGRP2P85332_rs8678007 | 5974172 | A | 1 | 1      | G |
| 6 | BICF2G630807951        | 5980969 | A | 0 | 0      | G |
| 6 | BICF2G630807959        | 5999698 | 0 | 0 | 0      | G |
| 6 | BICF2G630807962        | 6007585 | A | 0 | 0      | G |
| 6 | TIGRP2P85335_rs8968831 | 6017588 | G | 1 | 1      | A |
| 6 | BICF2G630807965        | 6030686 | A | 0 | 0.2857 | C |
| 6 | BICF2G630807968        | 6045609 | A | 0 | 0      | G |
| 6 | BICF2G630807972        | 6049578 | G | 0 | 0      | A |
| 6 | TIGRP2P85341_rs8897195 | 6053960 | A | 0 | 0      | G |
| 6 | BICF2G630807977        | 6061620 | G | 1 | 1      | A |
| 6 | BICF2G630807979        | 6067508 | G | 1 | 1      | A |
| 6 | BICF2G630807981        | 6072266 | G | 1 | 0.7143 | A |

|   |                        |         |   |   |        |   |
|---|------------------------|---------|---|---|--------|---|
| 6 | BICF2P119720           | 6093526 | A | 0 | 0.2857 | G |
| 6 | BICF2P415895           | 6099202 | C | 0 | 0      | A |
| 6 | BICF2S23050935         | 6107984 | A | 0 | 0      | G |
| 6 | BICF2P646823           | 6119461 | G | 0 | 0.2857 | A |
| 6 | BICF2P389457           | 6145173 | A | 0 | 0      | G |
| 6 | BICF2P189450           | 6175268 | 0 | 0 | 0      | A |
| 6 | TIGRP2P85358_rs9009190 | 6183638 | A | 0 | 0.2857 | G |
| 6 | BICF2P998045           | 6193477 | A | 0 | 0      | G |
| 6 | BICF2S2333373          | 6209899 | G | 0 | 0.2857 | C |
| 6 | BICF2P270925           | 6216176 | A | 0 | 0.2857 | G |
| 6 | BICF2P458065           | 6223608 | 0 | 0 | 0      | A |
| 6 | BICF2P899400           | 6235345 | G | 0 | 0.2857 | A |
| 6 | BICF2P1150504          | 6253442 | 0 | 0 | 0      | G |
| 6 | BICF2P231069           | 6259931 | 0 | 0 | 0      | A |
| 6 | BICF2P567461           | 6269182 | G | 0 | 0.2857 | C |
| 6 | BICF2G630807993        | 6283197 | 0 | 0 | 0      | G |
| 6 | BICF2P867435           | 6291535 | A | 0 | 0.2857 | C |
| 6 | BICF2P785778           | 6307446 | A | 0 | 0      | G |
| 6 | BICF2P440904           | 6320310 | G | 0 | 0.2857 | A |
| 6 | BICF2G630807994        | 6327465 | G | 0 | 0      | A |
| 6 | TIGRP2P85373_rs9017032 | 6340439 | 0 | 0 | 0      | C |
| 6 | BICF2P481732           | 6351099 | C | 0 | 0.2857 | A |
| 6 | BICF2G630807999        | 6365646 | 0 | 0 | 0      | A |
| 6 | TIGRP2P85377_rs9069041 | 6380698 | C | 0 | 0      | A |
| 6 | BICF2P524562           | 6384649 | T | 0 | 0      | A |
| 6 | BICF2G630808002        | 6398781 | 0 | 0 | 0      | G |
| 6 | BICF2P1403221          | 6406947 | G | 0 | 0.25   | A |
| 6 | BICF2P1367401          | 6424507 | A | 0 | 0      | G |
| 6 | TIGRP2P85384_rs8956654 | 6443279 | 0 | 0 | 0      | G |
| 6 | TIGRP2P85385_rs9028187 | 6455895 | G | 0 | 0.2857 | A |
| 6 | BICF2P732401           | 6467443 | A | 0 | 0.2857 | G |
| 6 | BICF2P515380           | 6482411 | 0 | 0 | 0      | G |
| 6 | BICF2P310287           | 6506874 | G | 0 | 0.2857 | A |
| 6 | BICF2G630808007        | 6521502 | 0 | 0 | 0      | G |
| 6 | BICF2P1049268          | 6534913 | A | 0 | 0.2857 | G |
| 6 | BICF2P974170           | 6554302 | A | 0 | 0.2857 | G |
| 6 | BICF2G630808008        | 6555729 | 0 | 0 | 0      | G |
| 6 | TIGRP2P85393_rs9077443 | 6575350 | G | 0 | 0.2857 | C |
| 6 | TIGRP2P85396_rs9217314 | 6578790 | G | 0 | 0      | A |
| 6 | TIGRP2P85399_rs9207475 | 6590390 | A | 0 | 0      | G |
| 6 | BICF2G630808010        | 6603115 | G | 0 | 0.2857 | A |
| 6 | BICF2P877588           | 6622270 | G | 0 | 0      | A |
| 6 | BICF2P877587           | 6624478 | A | 0 | 0      | G |
| 6 | BICF2P138086           | 6645963 | 0 | 0 | 0      | A |
| 6 | BICF2P685466           | 6665132 | G | 0 | 0.2857 | A |
| 6 | BICF2P1276465          | 6678458 | A | 0 | 0      | C |
| 6 | BICF2P625713           | 6691308 | A | 0 | 0      | G |

|   |                        |         |   |   |        |   |
|---|------------------------|---------|---|---|--------|---|
| 6 | BICF2P435896           | 6702494 | G | 0 | 0.2857 | A |
| 6 | BICF2P776106           | 6706961 | A | 0 | 0.2857 | C |
| 6 | BICF2G630808020        | 6716301 | A | 0 | 0      | T |
| 6 | BICF2P746431           | 6737023 | A | 0 | 0.2857 | G |
| 6 | BICF2P657904           | 6743737 | A | 0 | 0      | G |
| 6 | BICF2S23753813         | 6761771 | C | 0 | 0.2857 | A |
| 6 | BICF2P569510           | 6783122 | A | 0 | 0.2857 | G |
| 6 | BICF2P433079           | 6787603 | G | 0 | 0.2857 | A |
| 6 | BICF2S23214236         | 6804191 | A | 0 | 0      | G |
| 6 | BICF2P666773           | 6819087 | T | 0 | 0      | A |
| 6 | BICF2G630808022        | 6821211 | 0 | 0 | 0      | G |
| 6 | TIGRP2P85426_rs9127206 | 6832400 | A | 0 | 0      | G |
| 6 | BICF2P1018975          | 6842888 | G | 0 | 0      | A |
| 6 | BICF2P19143            | 6848071 | A | 0 | 0      | C |
| 6 | BICF2G630808028        | 6862977 | G | 0 | 0      | A |
| 6 | BICF2G630808031        | 6868873 | A | 0 | 0      | T |
| 6 | BICF2G630808034        | 6880175 | A | 0 | 0      | G |
| 6 | BICF2G630808041        | 6894390 | G | 0 | 0.2857 | A |
| 6 | BICF2G630808048        | 6910874 | 0 | 0 | 0      | A |
| 6 | BICF2P1148245          | 6913635 | A | 0 | 0      | T |
| 6 | BICF2G630808055        | 6929204 | 0 | 0 | 0      | G |
| 6 | BICF2G630808058        | 6934749 | A | 0 | 0      | C |
| 6 | BICF2P425383           | 6953009 | 0 | 0 | 0      | A |
| 6 | BICF2G630808073        | 6971304 | G | 0 | 0      | A |
| 6 | BICF2G630808075        | 6984659 | A | 0 | 0      | T |
| 6 | BICF2P957230           | 6998342 | A | 0 | 0      | G |
| 6 | TIGRP2P85444_rs8695680 | 7009542 | A | 0 | 0      | G |
| 6 | BICF2P864992           | 7019553 | A | 0 | 0      | T |
| 6 | BICF2P711144           | 7034558 | A | 0 | 0      | G |
| 6 | BICF2G630808078        | 7046446 | G | 0 | 0      | A |
| 6 | BICF2S23441278         | 7052538 | G | 0 | 0      | A |
| 6 | BICF2P427009           | 7066382 | G | 0 | 0      | A |
| 6 | BICF2P560997           | 7072609 | A | 0 | 0      | G |
| 6 | TIGRP2P85455_rs8949533 | 7087246 | G | 0 | 0.3571 | A |
| 6 | TIGRP2P85459_rs8744175 | 7095917 | C | 0 | 0.3571 | A |
| 6 | BICF2G630808104        | 7114293 | G | 0 | 0.3571 | A |
| 6 | BICF2G630808120        | 7128438 | C | 0 | 0      | A |
| 6 | BICF2G630808125        | 7136835 | 0 | 0 | 0      | C |
| 6 | BICF2P788615           | 7148724 | C | 0 | 0      | A |
| 6 | BICF2P965582           | 7151393 | A | 0 | 0      | G |
| 6 | BICF2G630808134        | 7151783 | A | 0 | 0      | G |
| 6 | BICF2G630808135        | 7153065 | A | 0 | 0      | C |
| 6 | BICF2P298753           | 7166152 | G | 0 | 0      | A |
| 6 | BICF2P1065607          | 7184264 | G | 0 | 0.3571 | A |
| 6 | BICF2P1065608          | 7184358 | G | 0 | 0.3571 | A |
| 6 | BICF2P487152           | 7190211 | C | 0 | 0.3571 | A |
| 6 | BICF2G630808154        | 7191400 | A | 0 | 0      | T |

|   |                        |         |   |    |        |   |
|---|------------------------|---------|---|----|--------|---|
| 6 | BICF2G630808161        | 7195213 | T | 0  | 0      | A |
| 6 | BICF2G630808172        | 7202222 | A | 0  | 0      | G |
| 6 | BICF2G630808190        | 7214015 | G | 0  | 0      | A |
| 6 | TIGRP2P85490_rs9242706 | 7222463 | A | 0  | 0      | C |
| 6 | BICF2P914005           | 7242740 | A | 0  | 0      | C |
| 6 | BICF2P252126           | 7246794 | C | 0  | 0      | A |
| 6 | BICF2G630808208        | 7265846 | A | 0  | 0      | C |
| 6 | BICF2G630808212        | 7268892 | G | 0  | 0      | A |
| 6 | BICF2G630808220        | 7281984 | A | 0  | 0.3571 | G |
| 6 | BICF2G630808232        | 7300950 | T | 0  | 0      | A |
| 6 | BICF2G630808235        | 7307422 | A | 0  | 0      | G |
| 6 | BICF2G630808241        | 7317201 | G | 1  | 0.7143 | A |
| 6 | BICF2G630808246        | 7330203 | G | 0  | 0.3571 | A |
| 6 | BICF2G630808253        | 7341001 | A | 0  | 0.3571 | G |
| 6 | TIGRP2P85505_rs8537382 | 7343974 | A | 0  | 0.2857 | G |
| 6 | BICF2P1163743          | 7350501 | G | 0  | 0.2857 | A |
| 6 | BICF2G630808276        | 7362514 | A | 0  | 0      | G |
| 6 | BICF2G630808290        | 7374436 | A | 0  | 0.6429 | G |
| 6 | BICF2G630808297        | 7387353 | A | 0  | 0      | C |
| 6 | BICF2P200610           | 7402781 | A | 1  | 0.3571 | G |
| 6 | BICF2P1026609          | 7403259 | A | 1  | 0.3571 | T |
| 6 | BICF2G630808339        | 7410716 | A | 1  | 0.3571 | G |
| 6 | BICF2G630808343        | 7419897 | A | 1  | 0.3571 | G |
| 6 | BICF2G630808360        | 7435195 | A | 0  | 0      | G |
| 6 | TIGRP2P85563_rs9122879 | 7443288 | C | 0  | 0      | A |
| 6 | BICF2G630808377        | 7454888 | G | 0  | 0      | A |
| 6 | BICF2G630808386        | 7472781 | G | 0  | 0.6429 | A |
| 6 | BICF2G630808387        | 7476674 | A | 0  | 0      | G |
| 6 | BICF2G630808404        | 7487908 | G | 0  | 0.6429 | A |
| 6 | BICF2G630808430        | 7515010 | A | 0  | 0      | G |
| 6 | BICF2S2364813          | 7524143 | G | 0  | 0.6429 | A |
| 6 | BICF2G630808431        | 7536473 | 0 | NA | 0      | G |
| 6 | BICF2P413222           | 7555654 | 0 | 0  | 0      | T |
| 6 | BICF2S23221602         | 7588608 | G | 0  | 0.3571 | A |
| 6 | BICF2S23413244         | 7601735 | A | 0  | 0.3571 | G |
| 6 | G375f38S36             | 7625642 | 0 | 0  | 0      | A |
| 6 | BICF2P405533           | 7654387 | 0 | 0  | 0      | A |
| 6 | BICF2G630808437        | 7663934 | 0 | 0  | 0      | G |
| 6 | BICF2P487203           | 7675667 | 0 | 0  | 0      | A |
| 6 | BICF2S2366976          | 7691403 | 0 | 0  | 0      | G |
| 6 | BICF2S23113663         | 7699463 | A | 1  | 0.3571 | G |
| 6 | BICF2P833371           | 7708590 | A | 0  | 0      | G |
| 6 | G376f41S131            | 7728673 | 0 | 0  | 0      | C |
| 6 | BICF2P1179970          | 7748592 | G | 0  | 0      | A |
| 6 | BICF2P341188           | 7766292 | 0 | 0  | 0      | A |
| 6 | BICF2P1045674          | 7781805 | 0 | 0  | 0      | A |
| 6 | BICF2P920080           | 7791557 | 0 | 0  | 0      | A |

|   |                        |         |   |   |        |   |
|---|------------------------|---------|---|---|--------|---|
| 6 | BICF2G630808440        | 7822527 | A | 0 | 0      | G |
| 6 | BICF2P450641           | 7855826 | 0 | 0 | 0      | A |
| 6 | BICF2G630808441        | 7872661 | 0 | 0 | 0      | G |
| 6 | BICF2P616879           | 7885305 | 0 | 0 | 0      | A |
| 6 | BICF2G630808444        | 7905370 | A | 0 | 0      | C |
| 6 | BICF2G630808446        | 7957181 | G | 0 | 0.3571 | A |
| 6 | BICF2G630808450        | 8019902 | A | 0 | 0      | C |
| 6 | BICF2P42048            | 8030174 | A | 0 | 0.3571 | G |
| 6 | BICF2G630808463        | 8033272 | G | 0 | 0.3571 | A |
| 6 | BICF2G630808481        | 8049336 | G | 0 | 0.3571 | A |
| 6 | BICF2G630808483        | 8051454 | A | 0 | 0.3571 | G |
| 6 | BICF2G630808519        | 8064625 | A | 0 | 0      | G |
| 6 | BICF2P886253           | 8073345 | A | 0 | 0      | G |
| 6 | BICF2G630808533        | 8094239 | 0 | 0 | 0      | G |
| 6 | BICF2G630808539        | 8104856 | A | 0 | 0      | G |
| 6 | BICF2G630808541        | 8109560 | A | 0 | 0      | G |
| 6 | BICF2G630808556        | 8121763 | A | 0 | 0      | G |
| 6 | BICF2G630808560        | 8130674 | 0 | 0 | 0      | C |
| 6 | BICF2P283817           | 8144107 | T | 0 | 0      | A |
| 6 | BICF2P278591           | 8154132 | A | 0 | 0      | G |
| 6 | BICF2S2374580          | 8167051 | G | 0 | 0      | A |
| 6 | BICF2G630808588        | 8177077 | A | 0 | 0      | G |
| 6 | BICF2G630808592        | 8182275 | A | 0 | 0      | C |
| 6 | BICF2P530224           | 8188256 | C | 0 | 0      | A |
| 6 | BICF2G630808600        | 8221834 | 0 | 0 | 0      | A |
| 6 | BICF2S23148661         | 8231439 | A | 0 | 0.3571 | G |
| 6 | BICF2G630808603        | 8234131 | G | 0 | 0      | A |
| 6 | BICF2G630808607        | 8249919 | A | 1 | 0.3571 | G |
| 6 | BICF2P93749            | 8273411 | 0 | 0 | 0      | A |
| 6 | BICF2P889665           | 8286341 | C | 0 | 0.2857 | G |
| 6 | TIGRP2P85584_rs9119519 | 8300910 | G | 1 | 0.6429 | A |
| 6 | BICF2P418360           | 8307288 | A | 0 | 0.2857 | G |
| 6 | BICF2P1305352          | 8317816 | 0 | 0 | 0      | A |
| 6 | BICF2G630808630        | 8330338 | G | 1 | 0.6429 | A |
| 6 | BICF2G630808634        | 8334939 | 0 | 0 | 0      | G |
| 6 | BICF2G630808635        | 8337821 | A | 0 | 0      | G |
| 6 | BICF2G630808646        | 8349878 | A | 0 | 0      | C |
| 6 | BICF2G630808666        | 8362242 | A | 0 | 0      | G |
| 6 | BICF2G630808674        | 8373481 | A | 0 | 0.2857 | G |
| 6 | BICF2G630808687        | 8383828 | 0 | 0 | 0      | G |
| 6 | BICF2G630808690        | 8395888 | 0 | 0 | 0      | A |
| 6 | BICF2G630808698        | 8414432 | A | 1 | 1      | G |
| 6 | BICF2S23046882         | 8438812 | A | 1 | 0.3571 | G |
| 6 | BICF2G630808719        | 8444136 | 0 | 0 | 0      | G |
| 6 | BICF2G630808730        | 8453008 | 0 | 0 | 0      | A |
| 6 | BICF2P1200540          | 8466080 | G | 0 | 0      | A |
| 6 | BICF2G630808760        | 8480773 | A | 0 | 0      | G |

|   |                        |         |   |   |        |   |
|---|------------------------|---------|---|---|--------|---|
| 6 | BICF2G630808767        | 8489299 | A | 0 | 0.3571 | C |
| 6 | BICF2G630808783        | 8499991 | A | 0 | 0.3571 | C |
| 6 | BICF2P573422           | 8529188 | 0 | 0 | 0      | G |
| 6 | BICF2G630808787        | 8555692 | A | 0 | 0.6429 | G |
| 6 | BICF2P1369869          | 8556068 | A | 1 | 0.3571 | G |
| 6 | BICF2G630808804        | 8569675 | A | 0 | 0      | G |
| 6 | BICF2G630808812        | 8586739 | A | 0 | 0.2857 | G |
| 6 | BICF2P794739           | 8596608 | A | 0 | 0.3571 | G |
| 6 | BICF2S23133902         | 8604567 | A | 0 | 0      | G |
| 6 | BICF2G630808834        | 8611722 | 0 | 0 | 0      | G |
| 6 | TIGRP2P85630_rs9243498 | 8614525 | A | 1 | 0.3571 | G |
| 6 | BICF2G630808859        | 8627632 | G | 1 | 0.3    | A |
| 6 | BICF2S23618658         | 8636804 | 0 | 0 | 0      | A |
| 6 | BICF2P112316           | 8657708 | A | 1 | 0.3571 | G |
| 6 | BICF2P64033            | 8670477 | C | 0 | 0      | A |
| 6 | BICF2P97144            | 8675095 | T | 0 | 0.6667 | A |
| 6 | BICF2P952702           | 8690202 | A | 1 | 0.3571 | C |
| 6 | TIGRP2P85650_rs8622789 | 8694979 | C | 0 | 0.6429 | A |
| 6 | TIGRP2P85656_rs8866227 | 8714281 | C | 0 | 0.6667 | A |
| 6 | BICF2G630808907        | 8723326 | A | 0 | 0.2857 | G |
| 6 | BICF2G630808914        | 8736232 | A | 0 | 0.2857 | G |
| 6 | BICF2G630808921        | 8742463 | A | 0 | 0.2857 | G |
| 6 | BICF2G630808932        | 8752410 | A | 0 | 0.3571 | G |
| 6 | BICF2G630808939        | 8765891 | G | 0 | 0.3571 | A |
| 6 | BICF2G630808945        | 8778049 | 0 | 0 | 0      | G |
| 6 | BICF2G630808956        | 8795934 | A | 0 | 0.3571 | G |
| 6 | BICF2G630808966        | 8806510 | A | 0 | 0      | G |
| 6 | TIGRP2P85684_rs9036504 | 8811028 | G | 0 | 0.3571 | A |
| 6 | BICF2S23012129         | 8824250 | A | 0 | 0.2857 | G |
| 6 | BICF2P187556           | 8834992 | A | 0 | 0.3571 | G |
| 6 | BICF2P1195281          | 8850065 | C | 1 | 0.3571 | G |
| 6 | BICF2S2293092          | 8857920 | 0 | 0 | 0      | A |
| 6 | BICF2G630808997        | 8866867 | C | 1 | 0.3571 | A |
| 6 | BICF2G630809008        | 8882290 | A | 1 | 0.3571 | G |
| 6 | BICF2P1175380          | 8891211 | A | 1 | 0.6429 | G |
| 6 | BICF2G630809017        | 8903364 | A | 0 | 0      | G |
| 6 | BICF2P291644           | 8913574 | A | 0 | 0.3571 | G |
| 6 | BICF2G630809065        | 8930360 | G | 1 | 0.6429 | A |
| 6 | BICF2G630809074        | 8934044 | T | 1 | 0.6429 | A |
| 6 | BICF2P1291646          | 8939214 | A | 0 | 0.2857 | G |
| 6 | BICF2S23354079         | 8957416 | A | 1 | 0.7143 | G |
| 6 | BICF2G630809102        | 8968628 | A | 0 | 0.2857 | G |
| 6 | BICF2G630809112        | 8972089 | A | 0 | 0.2857 | G |
| 6 | BICF2G630809130        | 8983376 | A | 0 | 0      | G |
| 6 | BICF2G630809142        | 8996718 | G | 0 | 0      | A |
| 6 | BICF2G630809161        | 9014652 | A | 0 | 0      | G |
| 6 | BICF2G630809165        | 9017867 | G | 0 | 0      | A |

|   |                        |         |   |   |        |   |
|---|------------------------|---------|---|---|--------|---|
| 6 | BICF2G630809194        | 9040198 | G | 0 | 0      | A |
| 6 | TIGRP2P85735_rs8612074 | 9043224 | A | 0 | 0      | G |
| 6 | BICF2G630809202        | 9052787 | A | 0 | 0      | G |
| 6 | TIGRP2P85743_rs8643382 | 9066007 | A | 1 | 0.6429 | G |
| 6 | TIGRP2P85748_rs8641594 | 9074446 | A | 1 | 0.6429 | G |
| 6 | TIGRP2P85754_rs8602612 | 9095578 | T | 1 | 0.6429 | A |
| 6 | TIGRP2P85758_rs8905305 | 9098056 | A | 0 | 0.2857 | G |
| 6 | BICF2P894756           | 9110284 | A | 0 | 0      | G |
| 6 | BICF2G630809296        | 9117947 | G | 0 | 0      | A |
| 6 | BICF2G630809301        | 9125232 | A | 0 | 0      | C |
| 6 | BICF2G630809319        | 9135681 | G | 0 | 0      | A |
| 6 | TIGRP2P85763_rs8693289 | 9144002 | A | 0 | 0.2857 | G |
| 6 | BICF2G630809337        | 9161707 | A | 0 | 0      | G |
| 6 | BICF2G630809343        | 9168664 | A | 0 | 0.2857 | G |
| 6 | BICF2G630809349        | 9183325 | G | 1 | 0.7143 | A |
| 6 | BICF2G630809350        | 9183957 | C | 1 | 1      | A |
| 6 | BICF2P206518           | 9211190 | 0 | 0 | 0      | A |
| 6 | BICF2P361906           | 9219378 | A | 0 | 0.3571 | G |
| 6 | BICF2G630809365        | 9225774 | A | 0 | 0.3571 | G |
| 6 | BICF2G630809373        | 9254578 | A | 0 | 0.6429 | G |
| 6 | BICF2S23016970         | 9268507 | G | 1 | 1      | A |
| 6 | BICF2P1413964          | 9271826 | A | 0 | 0.6429 | G |
| 6 | TIGRP2P85780_rs9028355 | 9281668 | A | 0 | 0      | G |
| 6 | BICF2G630809385        | 9300303 | G | 1 | 1      | A |
| 6 | BICF2P1031334          | 9304579 | G | 1 | 1      | A |
| 6 | BICF2P504081           | 9317612 | 0 | 0 | 0      | A |
| 6 | BICF2G630809392        | 9333490 | G | 0 | 0      | A |
| 6 | BICF2G630809397        | 9344517 | G | 0 | 0      | A |
| 6 | BICF2G630809405        | 9352755 | A | 1 | 0.7143 | C |
| 6 | BICF2G630809420        | 9363690 | 0 | 0 | 0      | C |
| 6 | BICF2P58503            | 9379907 | A | 1 | 0.6429 | G |
| 6 | BICF2G630809426        | 9389502 | A | 1 | 0.6667 | G |
| 6 | BICF2G630809438        | 9425834 | A | 0 | 0      | G |
| 6 | BICF2G630809443        | 9430116 | A | 0 | 0      | G |
| 6 | BICF2P784242           | 9448887 | A | 0 | 0      | G |
| 6 | BICF2G630809468        | 9454619 | 0 | 0 | 0      | A |
| 6 | BICF2P573880           | 9468364 | A | 0 | 0.3571 | G |
| 6 | TIGRP2P85800_rs8665808 | 9478785 | G | 0 | 0.6429 | A |
| 6 | BICF2G630809489        | 9493730 | G | 0 | 0.6429 | A |
| 6 | BICF2S23430467         | 9501976 | A | 0 | 0.6429 | G |
| 6 | BICF2G630809506        | 9534669 | C | 0 | 0.6429 | A |
| 6 | BICF2P38863            | 9540366 | G | 0 | 0.6429 | A |
| 6 | TIGRP2P85803_rs8963098 | 9549074 | A | 0 | 0.6429 | T |
| 6 | BICF2S23740063         | 9560403 | A | 0 | 0      | G |
| 6 | BICF2G630809515        | 9573756 | A | 0 | 0.6429 | C |
| 6 | BICF2G630809517        | 9586001 | G | 0 | 0.6429 | A |
| 6 | BICF2S23623800         | 9600690 | G | 0 | 0      | A |



|   |                        |          |   |     |        |   |
|---|------------------------|----------|---|-----|--------|---|
| 6 | BICF2G630809522        | 9633039  | A | 0   | 0      | G |
| 6 | TIGRP2P85806_rs9039902 | 9637936  | 0 | 0   | 0      | G |
| 6 | BICF2G630809523        | 9651466  | G | 0   | 0.6429 | A |
| 6 | BICF2G630809527        | 9665608  | G | 0   | 0.3571 | A |
| 6 | BICF2G630809531        | 9674795  | T | 0   | 0      | A |
| 6 | BICF2G630809536        | 9685064  | A | 0   | 0.2857 | G |
| 6 | BICF2G630809548        | 9698547  | A | 0   | 0.2857 | G |
| 6 | BICF2G630809552        | 9711819  | G | 0   | 0.2857 | A |
| 6 | BICF2G630809557        | 9719984  | C | 0   | 0      | A |
| 6 | BICF2P1373355          | 9730302  | G | 0   | 0      | A |
| 6 | BICF2P313907           | 9745700  | 0 | 0   | 0      | C |
| 6 | BICF2G630809578        | 9757683  | G | 0   | 0.2857 | A |
| 6 | BICF2G630809584        | 9764959  | A | 0   | 0      | G |
| 6 | BICF2G630809590        | 9776467  | A | 0   | 0      | C |
| 6 | BICF2G630809602        | 9797780  | C | 0   | 0      | A |
| 6 | BICF2G630809617        | 9816608  | G | 0   | 0      | A |
| 6 | BICF2P756196           | 9830592  | A | 0   | 0.3571 | G |
| 6 | BICF2G630809636        | 9836478  | G | 0   | 0      | A |
| 6 | BICF2G630809645        | 9844100  | A | 0   | 0      | G |
| 6 | BICF2G630809664        | 9859615  | A | 0   | 0      | G |
| 6 | BICF2G630809679        | 9867633  | A | 0   | 0      | G |
| 6 | BICF2G630809703        | 9878732  | A | 0   | 0      | G |
| 6 | BICF2G630809704        | 9878905  | A | 0   | 0      | G |
| 6 | BICF2G630809733        | 9898267  | A | 0   | 0.6429 | G |
| 6 | BICF2G630809739        | 9908416  | A | 0   | 0.6429 | G |
| 6 | BICF2G630809754        | 9921343  | A | 0   | 0.2857 | G |
| 6 | BICF2G630809759        | 9926174  | G | 0   | 0.6429 | A |
| 6 | BICF2G630809788        | 9944620  | G | 0   | 0.6429 | A |
| 6 | BICF2S2373477          | 9978392  | C | 0   | 0      | A |
| 6 | TIGRP2P85832_rs9184468 | 9998099  | 0 | 0   | 0      | C |
| 6 | G378f45S224            | 10006580 | A | 0   | 0.3571 | C |
| 6 | BICF2S23225290         | 10026042 | A | 1   | 0.7143 | G |
| 6 | BICF2G630809797        | 10031286 | 0 | 0   | 0      | A |
| 6 | BICF2S22927431         | 10040320 | A | 1   | 0.7143 | C |
| 6 | TIGRP2P85833_rs8822660 | 10060721 | G | 0   | 0.2857 | C |
| 6 | BICF2S23439135         | 10065193 | C | 1   | 0.7143 | G |
| 6 | BICF2S23629444         | 10089941 | G | 1   | 0.7143 | A |
| 6 | BICF2P1221621          | 10113879 | 0 | 0   | 0      | C |
| 6 | TIGRP2P85841_rs8598796 | 10127152 | A | 0   | 0.3571 | G |
| 6 | BICF2P1405819          | 10139176 | A | 0   | 0      | G |
| 6 | BICF2P384372           | 10154114 | A | 0   | 0      | G |
| 6 | BICF2S22913951         | 10156015 | G | 1   | 0.3571 | A |
| 6 | BICF2S23634217         | 10171062 | 0 | 0   | 0      | G |
| 6 | TIGRP2P85850_rs9028642 | 10178625 | A | 1   | 0.3571 | G |
| 6 | BICF2S2363070          | 10208513 | A | 1   | 0.3571 | G |
| 6 | BICF2G630809810        | 10234121 | A | 0.5 | 0.2143 | G |
| 6 | BICF2G630809814        | 10237567 | G | 1   | 0.7143 | A |

|   |                        |          |   |     |        |   |
|---|------------------------|----------|---|-----|--------|---|
| 6 | BICF2G630809819        | 10254073 | A | 0   | 0.2857 | G |
| 6 | BICF2G630809838        | 10271748 | G | 0   | 0.2857 | A |
| 6 | TIGRP2P77353_rs8979714 | 10282579 | A | 0   | 0.2857 | G |
| 6 | BICF2G630809855        | 10287408 | G | 0.5 | 0.2143 | A |
| 6 | BICF2G630809858        | 10292711 | A | 0   | 0.2857 | G |
| 6 | BICF2S23121456         | 10307641 | A | 0   | 0      | G |
| 6 | BICF2G630809889        | 10317422 | A | 0   | 0      | G |
| 6 | BICF2G630809896        | 10336273 | A | 0   | 0      | G |
| 6 | BICF2G630809900        | 10339000 | G | 0   | 0      | A |
| 6 | BICF2P115812           | 10354346 | C | 0.5 | 0.5    | G |
| 6 | BICF2G630809917        | 10364926 | G | 0.5 | 0.5    | A |
| 6 | BICF2G630809937        | 10383477 | A | 1   | 1      | G |
| 6 | BICF2G630809939        | 10385533 | G | 0.5 | 0.5    | A |
| 6 | BICF2G630809964        | 10399453 | G | 0.5 | 0.5    | A |
| 6 | BICF2G630809974        | 10407672 | A | 0   | 0      | G |
| 6 | BICF2G630809997        | 10429516 | A | 0.5 | 0.5    | C |
| 6 | BICF2G630810005        | 10438635 | A | 0.5 | 0.5    | G |
| 6 | TIGRP2P77381_rs9090428 | 10450247 | A | 0   | 0      | G |
| 6 | BICF2G630810029        | 10456010 | A | 0.5 | 0.5    | G |
| 6 | BICF2P955008           | 10470181 | G | 0   | 0      | A |
| 6 | BICF2P1023099          | 10486603 | G | 0.5 | 0.5    | A |
| 6 | BICF2G630810035        | 10487125 | G | 0.5 | 0.5    | A |
| 6 | BICF2P243201           | 10489838 | A | 0   | 0      | G |
| 6 | BICF2P764928           | 10499548 | A | 0.5 | 0.5    | G |
| 6 | BICF2P642986           | 10516282 | C | 0   | 0      | A |
| 6 | BICF2P1306827          | 10531823 | A | 0   | 0      | T |
| 6 | BICF2P1076842          | 10543888 | 0 | 0   | 0      | G |
| 6 | BICF2S23621423         | 10553491 | 0 | 0   | 0      | A |
| 6 | BICF2G630810040        | 10561492 | T | 0.5 | 0.5    | A |
| 6 | BICF2S24415287         | 10575221 | A | 0   | 0      | C |
| 6 | TIGRP2P77399_rs8829879 | 10586075 | A | 0   | 0      | G |
| 6 | BICF2P877858           | 10588551 | G | 0   | 0      | A |
| 6 | TIGRP2P77405_rs8498134 | 10592446 | A | 0   | 0      | G |
| 6 | TIGRP2P77409_rs8493131 | 10603523 | 0 | 0   | 0      | G |
| 6 | BICF2G630810056        | 10615480 | A | 0   | 0      | C |
| 6 | BICF2P987030           | 10635387 | G | 0   | 0      | A |
| 6 | BICF2G630810069        | 10636139 | A | 1   | 1      | G |
| 6 | BICF2G630810073        | 10638196 | G | 1   | 1      | A |
| 6 | BICF2G630810079        | 10650101 | A | 0   | 0      | G |
| 6 | BICF2G630810101        | 10667040 | A | 0   | 0      | G |
| 6 | BICF2G630810109        | 10679173 | G | 0   | 0      | C |
| 6 | BICF2G630810120        | 10694015 | G | 0   | 0      | A |
| 6 | BICF2P697084           | 10704445 | A | 0   | 0      | G |
| 6 | BICF2P467354           | 10726039 | G | 0   | 0      | A |
| 6 | BICF2P682297           | 10735534 | G | 1   | 1      | A |
| 6 | BICF2P682295           | 10736387 | A | 0   | 0      | G |
| 6 | TIGRP2P77443_rs8790294 | 10743546 | G | 0   | 0      | A |

|   |                        |          |   |     |        |   |
|---|------------------------|----------|---|-----|--------|---|
| 6 | BICF2S23652505         | 10762282 | G | 0   | 0      | A |
| 6 | TIGRP2P77447_rs9077638 | 10766523 | A | 0.5 | 0.5    | G |
| 6 | BICF2P327568           | 10779815 | C | 1   | 1      | A |
| 6 | BICF2S23248600         | 10795566 | A | 0.5 | 0.1429 | G |
| 6 | BICF2P342880           | 10799366 | O | 0   | 0      | G |
| 6 | TIGRP2P77455_rs9078707 | 10812162 | T | 0   | 0      | A |
| 6 | BICF2P1465616          | 10815849 | O | 0   | 0      | G |
| 6 | BICF2P300904           | 10823730 | T | 0   | 0      | A |
| 6 | BICF2G630810130        | 10839065 | A | 0   | 0      | C |
| 6 | BICF2P1441066          | 10855464 | A | 0   | 0      | G |
| 6 | TIGRP2P77469_rs9255898 | 10861512 | O | 0   | 0      | G |
| 6 | BICF2P495282           | 10876452 | T | 1   | 1      | A |
| 6 | BICF2S23428867         | 10876861 | A | 1   | 1      | G |
| 6 | BICF2P495280           | 10877248 | O | 0   | 0      | A |
| 6 | BICF2P1114126          | 10883206 | A | 1   | 1      | G |
| 6 | BICF2P912520           | 10899201 | A | 1   | 1      | G |
| 6 | TIGRP2P77484_rs9160374 | 10905976 | A | 0   | 0      | G |
| 6 | BICF2P1359735          | 10918203 | O | 0   | 0      | A |
| 6 | TIGRP2P77495_rs9051517 | 10932750 | G | 0   | 0      | A |
| 6 | BICF2P821586           | 10940087 | C | 1   | 1      | A |
| 6 | TIGRP2P77502_rs8717555 | 10951738 | G | 0   | 0      | A |
| 6 | BICF2P1290654          | 10958588 | A | 0.5 | 0.8571 | G |
| 6 | BICF2P998154           | 10961992 | G | 1   | 1      | A |
| 6 | BICF2S22934028         | 10975957 | G | 0   | 0      | A |
| 6 | BICF2P575737           | 10992901 | G | 1   | 1      | A |
| 6 | BICF2P575733           | 10994213 | C | 1   | 1      | A |
| 6 | BICF2P669712           | 11009206 | G | 1   | 1      | C |
| 6 | BICF2P1026297          | 11020002 | A | 0   | 0      | G |
| 6 | BICF2P704063           | 11035074 | G | 0.5 | 0.1429 | A |
| 6 | BICF2P559912           | 11048220 | A | 0.5 | 0.1429 | C |
| 6 | BICF2S2321981          | 11052200 | G | 0.5 | 0.1429 | A |
| 6 | BICF2P945044           | 11066613 | A | 0   | 0      | G |
| 6 | TIGRP2P77537_rs8866486 | 11074638 | G | 0   | 0      | A |
| 6 | BICF2P477684           | 11096212 | G | 0.5 | 0.1429 | A |
| 6 | BICF2P491986           | 11106977 | A | 0.5 | 0.1429 | G |
| 6 | TIGRP2P77546_rs8851635 | 11112698 | O | 0   | 0      | G |
| 6 | TIGRP2P77549_rs8918169 | 11123290 | A | 0   | 0      | G |
| 6 | BICF2G630810143        | 11130832 | G | 0.5 | 0.1429 | A |
| 6 | BICF2P740888           | 11132170 | C | 0   | 0      | A |
| 6 | BICF2G630810149        | 11154363 | G | 0   | 0      | A |
| 6 | TIGRP2P77558_rs8954907 | 11163148 | G | 0   | 0      | C |
| 6 | BICF2G630810159        | 11177149 | G | 0.5 | 0.1429 | A |
| 6 | BICF2G630810173        | 11181920 | A | 0.5 | 0.1429 | G |
| 6 | BICF2P32896            | 11213909 | G | 0   | 0      | A |
| 6 | BICF2S22950026         | 11214576 | A | 0   | 0      | G |
| 6 | TIGRP2P77576_rs9025297 | 11228500 | A | 0   | 0      | T |
| 6 | BICF2S23310435         | 11245775 | A | 0   | 0      | G |

|   |                        |          |   |     |         |   |
|---|------------------------|----------|---|-----|---------|---|
| 6 | BICF2P552025           | 11252689 | A | 0   | 0       | G |
| 6 | BICF2P387089           | 11263777 | 0 | 0   | 0       | G |
| 6 | BICF2P945074           | 11276256 | A | 0.5 | 0.8571  | G |
| 6 | BICF2P529738           | 11284638 | A | 0   | 0       | G |
| 6 | TIGRP2P77604_rs8593295 | 11308719 | A | 0.5 | 0.1429  | G |
| 6 | BICF2S22958911         | 11319148 | A | 0   | 0       | G |
| 6 | BICF2P206053           | 11333515 | G | 0.5 | 0.1429  | A |
| 6 | TIGRP2P77615_rs8965168 | 11346649 | G | 0   | 0       | A |
| 6 | TIGRP2P77618_rs8741496 | 11350761 | A | 0   | 0       | G |
| 6 | BICF2S23729890         | 11375391 | A | 0.5 | 0.8571  | T |
| 6 | BICF2P254777           | 11398772 | 0 | 0   | 0       | G |
| 6 | BICF2P124399           | 11418616 | A | 0   | 0       | G |
| 6 | BICF2P1332903          | 11424752 | A | 0   | 0       | C |
| 6 | BICF2P170661           | 11439931 | A | 0.5 | 0.8571  | G |
| 6 | BICF2P412007           | 11451540 | A | 0.5 | 0.8571  | G |
| 6 | BICF2P1354767          | 11462695 | G | 0.5 | 0.8571  | A |
| 6 | BICF2P472346           | 11474009 | A | 0.5 | 0.9167  | G |
| 6 | BICF2P205255           | 11484772 | A | 0.5 | 0.1429  | G |
| 6 | BICF2P763423           | 11497039 | C | 0.5 | 0.8571  | A |
| 6 | BICF2P837893           | 11506498 | G | 0   | 0       | A |
| 6 | TIGRP2P77646_rs9074967 | 11514648 | 0 | 0   | 0       | A |
| 6 | BICF2P925836           | 11524207 | A | 0.5 | 0.1429  | G |
| 6 | TIGRP2P77652_rs9122981 | 11535417 | 0 | 0   | 0       | C |
| 6 | TIGRP2P77653_rs9032601 | 11569936 | A | 0.5 | 0.1429  | G |
| 6 | BICF2S24111320         | 11589080 | G | 0   | 0       | A |
| 6 | TIGRP2P77661_rs8793881 | 11600849 | G | 1   | 1       | A |
| 6 | BICF2P1381179          | 11605114 | C | 1   | 1       | G |
| 6 | TIGRP2P77677_rs8519218 | 11608766 | G | 1   | 1       | A |
| 6 | BICF2P1430225          | 11608900 | A | 1   | 1       | G |
| 6 | BICF2S2296995          | 11616418 | G | 1   | 1       | A |
| 6 | BICF2P354986           | 11632379 | A | 1   | 1       | C |
| 6 | TIGRP2P77687_rs8584168 | 11646154 | 0 | 0   | 0       | C |
| 6 | BICF2P1231900          | 11659824 | A | 0.5 | 0.1667  | G |
| 6 | TIGRP2P77693_rs8680618 | 11663197 | G | 1   | 1       | A |
| 6 | BICF2P642393           | 11665493 | G | 1   | 1       | A |
| 6 | TIGRP2P77697_rs9073780 | 11678147 | G | 1   | 1       | A |
| 6 | BICF2S23029673         | 11690964 | A | 1   | 1       | G |
| 6 | BICF2P686512           | 11705024 | A | 1   | 1       | G |
| 6 | BICF2P637416           | 11712666 | A | 0   | 0       | G |
| 6 | TIGRP2P77702_rs8638668 | 11713666 | A | 0   | 0       | G |
| 6 | BICF2P1375625          | 11719143 | G | 0   | 0       | A |
| 6 | BICF2P650989           | 11732013 | A | 0.5 | 0.8571  | C |
| 6 | BICF2S2366502          | 11742507 | A | 0   | 0       | G |
| 6 | TIGRP2P77740_rs8999913 | 11753630 | G | 0   | 0       | A |
| 6 | BICF2S23547427         | 11765750 | C | NA  | 0.08333 | A |
| 6 | BICF2P379548           | 11785775 | 0 | 0   | 0       | A |
| 6 | BICF2S23216925         | 11794401 | A | 0   | 0       | C |

|   |                        |          |   |     |        |   |
|---|------------------------|----------|---|-----|--------|---|
| 6 | BICF2P179458           | 11802500 | T | 0   | 0      | A |
| 6 | TIGRP2P77745_rs9176333 | 11820555 | G | 0   | 0      | A |
| 6 | BICF2S23745316         | 11824187 | A | 0   | 0      | G |
| 6 | TIGRP2P77772_rs8534320 | 11833822 | 0 | 0   | 0      | A |
| 6 | BICF2S2343751          | 11853430 | G | 0   | 0      | A |
| 6 | TIGRP2P77778_rs8924525 | 11867729 | 0 | 0   | 0      | C |
| 6 | TIGRP2P77783_rs8491126 | 11876794 | A | 0   | 0      | G |
| 6 | TIGRP2P77788_rs8658572 | 11886329 | 0 | 0   | 0      | A |
| 6 | BICF2P1405965          | 11899552 | A | 0.5 | 0.1429 | C |
| 6 | BICF2P1327277          | 11904372 | A | 0   | 0      | G |
| 6 | TIGRP2P77794_rs8909680 | 11920326 | G | 0   | 0      | A |
| 6 | BICF2P177358           | 11933630 | A | 0   | 0      | G |
| 6 | BICF2S23337047         | 11938181 | A | 0.5 | 0.1667 | G |
| 6 | BICF2P299916           | 11955836 | 0 | 0   | 0      | C |
| 6 | TIGRP2P77797_rs8964151 | 11962340 | A | 0   | 0      | G |
| 6 | TIGRP2P77806_rs9175977 | 11982455 | A | 0   | 0      | G |
| 6 | TIGRP2P77808_rs8624745 | 11984193 | G | 0.5 | 0.8571 | A |
| 6 | TIGRP2P77822_rs8918983 | 12002285 | A | 0.5 | 0.8571 | G |
| 6 | TIGRP2P77827_rs8950242 | 12012400 | C | 0   | 0      | A |
| 6 | BICF2S23622530         | 12021986 | A | 0   | 0      | G |
| 6 | BICF2P2926             | 12032507 | 0 | 0   | 0      | G |
| 6 | TIGRP2P77831_rs9121910 | 12050970 | A | 0.5 | 0.8571 | T |
| 6 | BICF2P331957           | 12059688 | A | 0   | 0      | G |
| 6 | TIGRP2P77836_rs8871869 | 12063246 | G | 0.5 | 0.8571 | A |
| 6 | BICF2P536041           | 12072681 | 0 | 0   | 0      | G |
| 6 | BICF2P835967           | 12075668 | G | 0.5 | 0.1429 | A |
| 6 | TIGRP2P77845_rs8807963 | 12091870 | G | 0.5 | 0.1429 | A |
| 6 | TIGRP2P77850_rs8992811 | 12101971 | A | 0.5 | 0.8571 | G |
| 6 | BICF2P605563           | 12102033 | A | 0.5 | 0.8571 | G |
| 6 | BICF2P711427           | 12112784 | A | 0   | 0      | G |
| 6 | BICF2P491557           | 12126804 | G | 0.5 | 0.1429 | A |
| 6 | BICF2S23211211         | 12147147 | 0 | 0   | 0      | G |
| 6 | TIGRP2P77862_rs8495477 | 12158330 | 0 | 0   | 0      | G |
| 6 | BICF2P346286           | 12168542 | 0 | 0   | 0      | A |
| 6 | BICF2S2323842          | 12186191 | G | 0   | 0      | A |
| 6 | BICF2P1344319          | 12201458 | A | 0.5 | 0.8571 | C |
| 6 | TIGRP2P77865_rs9194262 | 12207719 | C | 0.5 | 0.8571 | A |
| 6 | BICF2P254004           | 12215067 | G | 0   | 0      | A |
| 6 | BICF2S23228793         | 12244272 | G | 0   | 0      | A |
| 6 | BICF2P517444           | 12248027 | A | 0.5 | 0.8571 | G |
| 6 | TIGRP2P77882_rs9236598 | 12260829 | G | 0.5 | 0.8571 | A |
| 6 | TIGRP2P77887_rs8911366 | 12276934 | G | 0.5 | 0.8571 | A |
| 6 | BICF2P58871            | 12286024 | G | 0.5 | 0.8571 | A |
| 6 | TIGRP2P78040_rs8902718 | 12305364 | 0 | 0   | 0      | G |
| 6 | TIGRP2P77996_rs8995127 | 12324662 | 0 | 0   | 0      | G |
| 6 | BICF2P376084           | 12325873 | A | 0.5 | 0.9167 | G |
| 6 | BICF2P871275           | 12334576 | G | 0   | 0      | A |

|   |                        |          |   |     |        |   |
|---|------------------------|----------|---|-----|--------|---|
| 6 | BICF2S2294384          | 12341209 | G | 0   | 0      | A |
| 6 | BICF2P829738           | 12361209 | A | 0.5 | 0.1429 | G |
| 6 | BICF2P778011           | 12373962 | A | 0.5 | 0.1429 | G |
| 6 | BICF2P322746           | 12381491 | T | 0.5 | 0.8571 | A |
| 6 | BICF2P788382           | 12388969 | G | 0.5 | 0.1429 | A |
| 6 | BICF2P209679           | 12401714 | G | 0   | 0      | A |
| 6 | BICF2P1101770          | 12414216 | A | 0   | 0      | G |
| 6 | TIGRP2P78025_rs9119855 | 12420938 | A | 0   | 0      | T |
| 6 | BICF2P1262152          | 12435974 | A | 0   | 0      | G |
| 6 | BICF2P566250           | 12444605 | A | 0   | 0      | T |
| 6 | BICF2P910338           | 12469495 | C | 0.5 | 0.1429 | G |
| 6 | TIGRP2P78149_rs8673832 | 12478945 | A | 0   | 0      | G |
| 6 | BICF2P447231           | 12500769 | G | 0   | 0      | A |
| 6 | BICF2P631013           | 12514882 | G | 0   | 0      | A |
| 6 | BICF2P666214           | 12533559 | G | 0   | 0      | A |
| 6 | BICF2P1266835          | 12541308 | G | NA  | NA     | A |
| 6 | BICF2P125690           | 12547760 | A | 0.5 | 0.8571 | G |
| 6 | TIGRP2P78173_rs8572320 | 12560833 | 0 | 0   | 0      | A |
| 6 | BICF2S23253168         | 12569758 | A | 0.5 | 0.1429 | C |
| 6 | TIGRP2P78176_rs8869726 | 12588352 | 0 | 0   | 0      | C |
| 6 | BICF2P219365           | 12594267 | G | 0   | 0      | A |
| 6 | BICF2P1266769          | 12611810 | 0 | 0   | 0      | G |
| 6 | BICF2P170102           | 12617301 | G | 0.5 | 0.5714 | A |
| 6 | TIGRP2P78196_rs8743097 | 12633119 | 0 | 0   | 0      | G |
| 6 | BICF2P843506           | 12640124 | C | 0   | 0.2857 | A |
| 6 | BICF2P1037515          | 12642603 | 0 | 0   | 0      | G |
| 6 | BICF2P1402144          | 12655925 | A | 0   | 0.2857 | G |
| 6 | BICF2S23727650         | 12661827 | G | 0   | 0      | A |
| 6 | BICF2P797313           | 12678880 | A | 0   | 0      | G |
| 6 | TIGRP2P78223_rs9153087 | 12690825 | A | 0   | 0      | G |
| 6 | BICF2P456521           | 12697693 | A | 0   | 0      | G |
| 6 | TIGRP2P78235_rs9174406 | 12726085 | A | 0   | 0      | C |
| 6 | TIGRP2P78246_rs8833699 | 12731789 | A | 0   | 0.2857 | G |
| 6 | BICF2S23413415         | 12748394 | G | 0.5 | 0.5833 | A |
| 6 | TIGRP2P78298_rs8808224 | 12765968 | G | 0.5 | 0.5833 | A |
| 6 | BICF2P178829           | 12812822 | A | 0.5 | 0.5714 | G |
| 6 | BICF2S22954901         | 12842410 | A | 0   | 0      | G |
| 6 | BICF2P949227           | 12861376 | A | 0.5 | 0.5714 | G |
| 6 | BICF2P515522           | 12875489 | A | 0.5 | 0.5714 | C |
| 6 | BICF2P515523           | 12875650 | A | 0.5 | 0.5714 | G |
| 6 | TIGRP2P78377_rs8768163 | 12886521 | 0 | 0   | 0      | A |
| 6 | BICF2P382771           | 12895379 | A | 0.5 | 0.5714 | C |
| 6 | BICF2P384551           | 12896490 | A | 0.5 | 0.5714 | G |
| 6 | BICF2P1300041          | 12913285 | 0 | 0   | 0      | C |
| 6 | BICF2P1172682          | 12944318 | G | 0.5 | 0.5714 | A |
| 6 | BICF2P1317053          | 12948831 | A | 0.5 | 0.5714 | T |
| 6 | BICF2P1211237          | 12949783 | G | 0.5 | 0.5714 | A |

|   |                        |          |   |     |        |   |
|---|------------------------|----------|---|-----|--------|---|
| 6 | BICF2P582779           | 12968736 | T | 0.5 | 0.5714 | A |
| 6 | BICF2P139555           | 12982534 | A | 0.5 | 0.5714 | T |
| 6 | BICF2P955019           | 12984297 | A | 0.5 | 0.5714 | G |
| 6 | BICF2P327162           | 13003881 | G | 0   | 0.2857 | A |
| 6 | BICF2S23913391         | 13008697 | A | 0   | 0.2857 | G |
| 6 | BICF2S23229035         | 13027991 | G | 0   | 0.2857 | A |
| 6 | BICF2P1139791          | 13040285 | A | 0   | 0      | G |
| 6 | TIGRP2P78388_rs8665983 | 13047787 | C | 0   | 0      | A |
| 6 | TIGRP2P78394_rs8651698 | 13058575 | G | 0.5 | 0.5714 | A |
| 6 | BICF2P1235752          | 13058974 | G | 0.5 | 0.5714 | A |
| 6 | TIGRP2P78405_rs9180048 | 13069692 | A | 0.5 | 0.5714 | G |
| 6 | BICF2S23551027         | 13078232 | A | 0.5 | 0.5833 | G |
| 6 | BICF2S23720891         | 13088563 | G | 1   | 0.7143 | A |
| 6 | BICF2S23024984         | 13102051 | A | 0   | 0.2857 | C |
| 6 | BICF2S22954260         | 13113605 | A | 0   | 0.2857 | G |
| 6 | BICF2P1358119          | 13131171 | G | 0.5 | 0.4286 | C |
| 6 | BICF2P627377           | 13134801 | A | 0   | 0      | G |
| 6 | BICF2S2445184          | 13145341 | A | 0   | 0      | G |
| 6 | BICF2P224466           | 13145950 | A | 0.5 | 0.1429 | G |
| 6 | BICF2S23750152         | 13158504 | G | 0.5 | 0.1429 | A |
| 6 | BICF2P1363434          | 13170881 | A | 0.5 | 0.1429 | C |
| 6 | BICF2P935338           | 13182379 | A | 0.5 | 0.5714 | G |
| 6 | BICF2S23611482         | 13200874 | 0 | 0   | 0      | G |
| 6 | BICF2P1135692          | 13203556 | G | 0   | 0      | A |
| 6 | TIGRP2P78514_rs9046184 | 13224329 | G | 0   | 0      | A |
| 6 | BICF2P330828           | 13225503 | G | 0.5 | 0.5714 | C |
| 6 | BICF2P1283462          | 13255513 | A | 0   | 0      | G |
| 6 | BICF2P537170           | 13266839 | G | 0.5 | 0.4286 | A |
| 6 | BICF2P1306200          | 13276027 | A | 0.5 | 0.4286 | G |
| 6 | BICF2P993619           | 13288042 | A | 0.5 | 0.4286 | G |
| 6 | BICF2P177672           | 13297697 | G | 0.5 | 0.4286 | A |
| 6 | BICF2S23141804         | 13309946 | 0 | 0   | 0      | G |
| 6 | TIGRP2P78530_rs8723919 | 13325171 | A | 0.5 | 0.4286 | G |
| 6 | BICF2P937973           | 13334875 | C | 0   | 0.25   | A |
| 6 | TIGRP2P78544_rs9149166 | 13351357 | A | 1   | 1      | G |
| 6 | TIGRP2P78545_rs8931309 | 13354259 | A | 1   | 1      | G |
| 6 | BICF2S23217689         | 13365691 | A | 0.5 | 0.1429 | G |
| 6 | BICF2P1354149          | 13394775 | G | 1   | 1      | A |
| 6 | BICF2P763992           | 13400396 | G | 0   | 0      | A |
| 6 | BICF2P486572           | 13411816 | A | 0   | 0      | C |
| 6 | BICF2P1446011          | 13424348 | C | 0   | 0      | G |
| 6 | BICF2P23598            | 13433485 | G | 0.5 | 0.8571 | A |
| 6 | BICF2P227603           | 13469250 | A | 0   | 0      | G |
| 6 | TIGRP2P78565_rs8621872 | 13484086 | G | 0   | 0      | A |
| 6 | TIGRP2P78566_rs8769768 | 13491997 | A | 0.5 | 0.1429 | T |
| 6 | BICF2P1411957          | 13502749 | G | 0.5 | 0.1429 | A |
| 6 | BICF2P73852            | 13519271 | A | 0   | 0      | C |

|   |                        |          |   |     |        |   |
|---|------------------------|----------|---|-----|--------|---|
| 6 | TIGRP2P78571_rs8731813 | 13532232 | C | 0   | 0      | G |
| 6 | BICF2S23125774         | 13538677 | C | 0   | 0      | A |
| 6 | BICF2P1388279          | 13543189 | C | 0.5 | 0.1429 | A |
| 6 | BICF2P390830           | 13549952 | G | 0   | 0      | A |
| 6 | BICF2S22938413         | 13564349 | A | 0   | 0      | G |
| 6 | BICF2P488011           | 13572536 | A | 0.5 | 0.1429 | C |
| 6 | BICF2S2295983          | 13585433 | A | 0   | 0      | G |
| 6 | TIGRP2P78575_rs8688353 | 13596418 | C | 0.5 | 0.1429 | A |
| 6 | BICF2P917176           | 13626385 | G | 0.5 | 0.1429 | A |
| 6 | TIGRP2P78579_rs8727064 | 13631978 | 0 | 0   | 0      | C |
| 6 | TIGRP2P78581_rs8600057 | 13640972 | A | 0.5 | 0.1429 | C |
| 6 | BICF2P275833           | 13662603 | 0 | 0   | 0      | C |
| 6 | BICF2S2312493          | 13676226 | G | 0.5 | 0.1429 | A |
| 6 | BICF2S23538908         | 13689158 | A | 0   | 0      | C |
| 6 | BICF2P1358427          | 13696788 | A | 0.5 | 0.4286 | G |
| 6 | BICF2P65354            | 13711624 | A | 0.5 | 0.5714 | G |
| 6 | BICF2S2398855          | 13722032 | 0 | 0   | 0      | G |
| 6 | BICF2S2419516          | 13751048 | G | 0   | 0.2857 | A |
| 6 | BICF2S23449355         | 13755478 | G | 0   | 0.2857 | A |
| 6 | BICF2P1339750          | 13776065 | A | 0   | 0      | G |
| 6 | BICF2S23232242         | 13782401 | A | 0   | 0.2857 | G |
| 6 | BICF2P1425949          | 13784727 | A | 1   | 0.7143 | G |
| 6 | BICF2P1425947          | 13784914 | A | 1   | 0.7143 | G |
| 6 | BICF2P190746           | 13788078 | A | 0   | 0      | C |
| 6 | TIGRP2P78625_rs9121072 | 13798235 | A | 0   | 0      | G |
| 6 | BICF2P871594           | 13800609 | A | 0.5 | 0.8571 | G |
| 6 | BICF2P779813           | 13819695 | A | 1   | 1      | G |
| 6 | BICF2P775123           | 13825899 | A | 0   | 0      | G |
| 6 | BICF2P997250           | 13849133 | G | 1   | 1      | A |
| 6 | BICF2P372762           | 13865166 | G | 1   | 1      | A |
| 6 | BICF2S22958632         | 13872926 | A | 0   | 0.2857 | G |
| 6 | BICF2P916273           | 13886763 | A | 0   | 0.2857 | G |
| 6 | BICF2P1248640          | 13899871 | G | 0   | 0.2857 | A |
| 6 | BICF2P566973           | 13908168 | A | 0   | 0.2857 | C |
| 6 | TIGRP2P78635_rs9034179 | 13916115 | A | 0.5 | 0.1429 | G |
| 6 | BICF2P823254           | 13932909 | G | 0.5 | 0.4286 | A |
| 6 | BICF2P613425           | 13944836 | A | 0.5 | 0.4286 | G |
| 6 | BICF2P908268           | 13951377 | G | 0   | 0      | A |
| 6 | BICF2P1378341          | 13968146 | G | 1   | 1      | A |
| 6 | TIGRP2P78658_rs8655727 | 13975904 | G | 0   | 0.2857 | A |
| 6 | BICF2P520673           | 13990813 | G | 0   | 0.2857 | A |
| 6 | BICF2P34631            | 13997258 | G | 0   | 0.25   | A |
| 6 | BICF2P822850           | 14010081 | C | 0   | 0.25   | A |
| 6 | BICF2P612603           | 14027540 | G | 0   | 0      | A |
| 6 | TIGRP2P78673_rs8617682 | 14036063 | C | 0   | 0.2857 | G |
| 6 | BICF2P1114423          | 14051057 | A | 0   | 0.2857 | C |
| 6 | BICF2P842351           | 14055365 | C | 0   | 0.2857 | G |



|   |                        |          |   |     |        |   |
|---|------------------------|----------|---|-----|--------|---|
| 6 | BICF2P692506           | 14066825 | A | 0   | 0      | G |
| 6 | BICF2S23324965         | 14077648 | C | 0.5 | 0.1429 | G |
| 6 | BICF2P1409446          | 14083990 | A | 1   | 1      | G |
| 6 | BICF2S22961650         | 14092057 | A | 0.5 | 0.1429 | G |
| 6 | BICF2P1272661          | 14104716 | G | 0.5 | 0.8571 | A |
| 6 | BICF2S23438619         | 14113527 | A | 0.5 | 1      | C |
| 6 | BICF2P968142           | 14127897 | A | NA  | 0.6    | C |
| 6 | TIGRP2P78701_rs8603486 | 14138393 | C | 0.5 | 0.5714 | A |
| 6 | BICF2P1311300          | 14160633 | G | 0   | 0      | A |
| 6 | BICF2P732609           | 14187655 | G | 0.5 | 0.5714 | A |
| 6 | TIGRP2P78730_rs8752893 | 14195194 | 0 | 0   | 0      | A |
| 6 | TIGRP2P78731_rs8758837 | 14204194 | 0 | 0   | 0      | C |
| 6 | BICF2P343906           | 14218937 | A | 0   | 0      | G |
| 6 | BICF2S23711465         | 14236518 | G | 0   | 0.2857 | A |
| 6 | BICF2P813065           | 14246515 | A | 0   | 0      | G |
| 6 | BICF2S23441251         | 14249612 | A | 0   | 0      | C |
| 6 | BICF2P398305           | 14277877 | A | 0   | 0      | C |
| 6 | TIGRP2P78765_rs9034457 | 14286533 | C | 0   | 0.25   | A |
| 6 | BICF2S22946577         | 14299458 | A | 0   | 0.2857 | C |
| 6 | BICF2S23617767         | 14307786 | A | 1   | 0.7143 | G |
| 6 | BICF2P624547           | 14322156 | A | 1   | 1      | G |
| 6 | BICF2S2326721          | 14332028 | G | 1   | 1      | A |
| 6 | BICF2P882837           | 14341802 | G | 1   | 1      | A |
| 6 | BICF2P43109            | 14359828 | G | 1   | 1      | A |
| 6 | BICF2P180714           | 14365278 | A | 1   | 1      | C |
| 6 | BICF2P953117           | 14377909 | G | 1   | 1      | A |
| 6 | BICF2S23329890         | 14392873 | G | 1   | 0.7143 | A |
| 6 | BICF2P402499           | 14408543 | C | 1   | 1      | A |
| 6 | BICF2P741731           | 14409737 | 0 | 0   | 0      | G |
| 6 | BICF2P232281           | 14429133 | 0 | 0   | 0      | A |
| 6 | BICF2P769566           | 14434709 | 0 | 0   | 0      | G |
| 6 | BICF2P182583           | 14448060 | A | 0   | 0.2857 | C |
| 6 | BICF2P1393042          | 14471843 | 0 | 0   | 0      | G |
| 6 | BICF2P1053047          | 14482272 | 0 | 0   | 0      | A |
| 6 | BICF2P586580           | 14490107 | G | 0.5 | 0.5714 | A |
| 6 | BICF2P224339           | 14517105 | A | 0   | 0      | G |
| 6 | BICF2P620438           | 14556650 | A | 0.5 | 0.4286 | G |
| 6 | TIGRP2P78780_rs8547863 | 14564011 | A | 0.5 | 0.5714 | G |
| 6 | BICF2P821921           | 14569078 | A | 0.5 | 0.5714 | G |
| 6 | BICF2P1278810          | 14573662 | G | 0.5 | 0.8571 | A |
| 6 | BICF2P748383           | 14584984 | G | 0.5 | 0.1429 | A |
| 6 | BICF2P912731           | 14589583 | A | 0.5 | 0.1429 | G |
| 6 | BICF2S23112476         | 14593929 | T | 0   | 0.2857 | A |
| 6 | BICF2S23058317         | 14614094 | A | 0   | 0.2857 | C |
| 6 | BICF2P1350739          | 14644724 | 0 | 0   | 0      | A |
| 6 | BICF2P1438024          | 14669820 | 0 | 0   | 0      | A |
| 6 | BICF2S24512436         | 14674940 | A | 0   | 0      | C |

|   |                        |          |   |     |        |   |
|---|------------------------|----------|---|-----|--------|---|
| 6 | BICF2P528885           | 14691184 | A | 0   | 0.2857 | G |
| 6 | TIGRP2P78807_rs8577635 | 14703365 | 0 | 0   | 0      | G |
| 6 | BICF2P20799            | 14719405 | A | 0   | 0.2857 | G |
| 6 | BICF2S23156482         | 14756898 | A | 0.5 | 0.5714 | T |
| 6 | BICF2P248518           | 14766813 | G | 0.5 | 0.5714 | A |
| 6 | BICF2P788996           | 14785359 | A | 0.5 | 0.5714 | C |
| 6 | BICF2S23250501         | 14795185 | G | 0.5 | 0.5714 | A |
| 6 | BICF2P879759           | 14807396 | A | 0   | 0.2857 | G |
| 6 | TIGRP2P78825_rs9032978 | 14822434 | C | 0   | 0.2857 | A |
| 6 | BICF2P699862           | 14845203 | G | 0   | 0      | A |
| 6 | BICF2P334177           | 14859427 | C | 0   | 0      | A |
| 6 | BICF2P1177973          | 14869714 | A | 0.5 | 0.1429 | G |
| 6 | TIGRP2P78856_rs8917635 | 14882956 | A | 0   | 0      | G |
| 6 | TIGRP2P78865_rs9094914 | 14897240 | A | 0   | 0      | G |
| 6 | BICF2S22939059         | 14918381 | C | 0.5 | 0.1429 | A |
| 6 | TIGRP2P78868_rs8956526 | 14932368 | A | 0   | 0      | G |
| 6 | TIGRP2P78877_rs8929874 | 14940870 | A | 0.5 | 0.1429 | G |
| 6 | BICF2P698143           | 14960716 | 0 | 0   | 0      | G |
| 6 | BICF2P217086           | 14969381 | A | 0   | 0      | G |
| 6 | BICF2S23146736         | 15004894 | A | 0   | 0      | G |
| 6 | TIGRP2P78882_rs9085196 | 15015242 | G | 0   | 0.2857 | A |
| 6 | BICF2P1215387          | 15021300 | G | 0   | 0      | A |
| 6 | BICF2P1426801          | 15038691 | A | 0   | 0      | G |
| 6 | BICF2P486512           | 15092668 | 0 | 0   | 0      | A |
| 6 | BICF2P390512           | 15156935 | 0 | 0   | 0      | G |
| 6 | TIGRP2P78967_rs8772007 | 15162337 | C | 0   | 0      | G |
| 6 | BICF2P741065           | 15171742 | G | 0   | 0      | A |
| 6 | BICF2P74125            | 15182037 | A | 0   | 0      | G |
| 6 | BICF2P1313887          | 15219237 | C | 0   | 0      | A |
| 6 | BICF2S23343413         | 15238364 | C | 0   | 0.2857 | G |
| 6 | TIGRP2P78987_rs8874853 | 15253412 | A | 0   | 0      | G |
| 6 | BICF2P1448305          | 15261699 | G | 0   | 0      | A |
| 6 | TIGRP2P78990_rs8656455 | 15277922 | A | 0   | 0.2857 | G |
| 6 | BICF2S22938732         | 15291714 | G | 0   | 0.2857 | A |
| 6 | BICF2S23338576         | 15300104 | C | 0   | 0.25   | A |
| 6 | TIGRP2P78995_rs8983531 | 15311085 | A | 0.5 | 0.5    | T |
| 6 | TIGRP2P79002_rs9180140 | 15331159 | G | 0   | 0.2857 | C |
| 6 | BICF2S24115642         | 15350474 | G | 0   | 0.2857 | A |
| 6 | TIGRP2P79007_rs8677643 | 15353985 | A | 0   | 0.2857 | G |
| 6 | BICF2P132251           | 15368708 | G | 1   | 1      | A |
| 6 | BICF2P504795           | 15377854 | A | 0   | 0      | C |
| 6 | BICF2P1452398          | 15391872 | A | 0   | 0      | G |
| 6 | BICF2S23161640         | 15402224 | A | 0   | 0.2857 | G |
| 6 | BICF2P896636           | 15413290 | A | 0.5 | 0.9167 | G |
| 6 | TIGRP2P79042_rs8561557 | 15427813 | A | 0   | 0.2857 | G |
| 6 | BICF2P1372971          | 15428663 | C | 0.5 | 0.5714 | A |
| 6 | BICF2S23158048         | 15435399 | A | 0.5 | 0.8571 | G |

|   |                        |          |   |     |        |   |
|---|------------------------|----------|---|-----|--------|---|
| 6 | BICF2P1286441          | 15453047 | A | 0   | 0      | G |
| 6 | BICF2P1461175          | 15455294 | A | 0.5 | 0.1429 | G |
| 6 | BICF2P573209           | 15460624 | A | 0   | 0      | G |
| 6 | BICF2P409215           | 15477123 | A | 0.5 | 0.8571 | G |
| 6 | BICF2P438684           | 15480469 | G | 0.5 | 0.8571 | A |
| 6 | BICF2P824836           | 15485195 | G | 0.5 | 0.8571 | A |
| 6 | BICF2P1267860          | 15494779 | A | 0   | 0      | G |
| 6 | BICF2S2351545          | 15511936 | A | 0.5 | 0.8571 | G |
| 6 | BICF2S23028659         | 15522236 | C | 0.5 | 0.1429 | G |
| 6 | BICF2P1206066          | 15533002 | A | 0.5 | 0.1429 | G |
| 6 | BICF2S2365739          | 15539171 | T | 0.5 | 0.8571 | A |
| 6 | BICF2P465503           | 15551144 | C | 0.5 | 0.8571 | A |
| 6 | BICF2P637863           | 15561597 | A | 0   | 0      | G |
| 6 | BICF2P1165724          | 15577093 | G | 0   | 0      | A |
| 6 | TIGRP2P79085_rs8778454 | 15587070 | C | 1   | 1      | A |
| 6 | BICF2P958223           | 15597619 | A | 0.5 | 0.1429 | G |
| 6 | BICF2P1181620          | 15606307 | G | 0   | 0      | A |
| 6 | TIGRP2P79105_rs8782366 | 15617093 | G | 0   | 0      | C |
| 6 | BICF2S23432256         | 15640611 | A | 0   | 0      | C |
| 6 | BICF2P969271           | 15658510 | G | 0   | 0.2857 | A |
| 6 | BICF2P935743           | 15669194 | A | 0   | 0.2857 | G |
| 6 | BICF2S2346973          | 15681792 | A | 0   | 0.2857 | G |
| 6 | BICF2P1099159          | 15686940 | A | 0   | 0.2857 | G |
| 6 | TIGRP2P79115_rs9069087 | 15698090 | C | 0   | 0.25   | A |
| 6 | BICF2P1131020          | 15714331 | A | 0   | 0      | G |
| 6 | BICF2P629390           | 15726088 | A | 0.5 | 0.1429 | G |
| 6 | TIGRP2P79126_rs9138471 | 15742530 | A | 0   | 0.2857 | G |
| 6 | BICF2P646509           | 15752646 | G | 0   | 0.2857 | A |
| 6 | BICF2P1186091          | 15760049 | G | 0   | 0      | C |
| 6 | BICF2S23223735         | 15775594 | A | 0   | 0.2857 | G |
| 6 | BICF2S23212354         | 15778814 | C | 0   | 0.2857 | A |
| 6 | BICF2P1087335          | 15794703 | 0 | 0   | 0      | C |
| 6 | BICF2P1048320          | 15802787 | A | 0   | 0.2857 | G |
| 6 | BICF2P510738           | 15815613 | G | 0   | 0.2857 | A |
| 6 | BICF2P499590           | 15825019 | G | 0   | 0.25   | A |
| 6 | BICF2P1407106          | 15845480 | A | 0   | 0      | G |
| 6 | TIGRP2P79148_rs8818736 | 15849993 | A | 0.5 | 0.5714 | G |
| 6 | BICF2P434712           | 15868136 | A | 0   | 0      | G |
| 6 | BICF2P1231911          | 15870354 | A | 1   | 0.7143 | G |
| 6 | BICF2P412093           | 15876975 | G | 1   | 0.7143 | A |
| 6 | BICF2P1380167          | 15885731 | A | 0   | 0      | G |
| 6 | BICF2P820521           | 15890484 | A | 1   | 0.7143 | G |
| 6 | BICF2P1128886          | 15896957 | G | 1   | 0.7143 | A |
| 6 | TIGRP2P79156_rs8692770 | 15904681 | A | 0   | 0      | G |
| 6 | BICF2P387801           | 15925776 | A | 0   | 0      | C |
| 6 | BICF2S23658510         | 15933385 | G | 0   | 0.2857 | A |
| 6 | TIGRP2P79158_rs8542216 | 15945105 | C | 0   | 0      | A |

|   |                        |          |   |     |        |   |
|---|------------------------|----------|---|-----|--------|---|
| 6 | BICF2P1399403          | 15945348 | C | 0   | 0      | A |
| 6 | BICF2P731828           | 15960639 | A | 0   | 0      | G |
| 6 | BICF2P52793            | 15967410 | A | 0   | 0      | G |
| 6 | BICF2P272134           | 15972865 | A | 0   | 0      | C |
| 6 | BICF2P222137           | 15993923 | G | 0   | 0      | A |
| 6 | BICF2P908334           | 16002276 | G | 0   | 0      | A |
| 6 | BICF2P217831           | 16013304 | C | 0.5 | 0.1429 | A |
| 6 | BICF2P1075489          | 16026571 | G | 0.5 | 0.4286 | A |
| 6 | BICF2P691170           | 16037996 | A | 0.5 | 0.4286 | G |
| 6 | BICF2P691171           | 16038448 | A | 0.5 | 0.4286 | T |
| 6 | BICF2P1324968          | 16043741 | C | 0.5 | 0.4286 | A |
| 6 | BICF2P752628           | 16065141 | A | 0.5 | 0.4286 | G |
| 6 | BICF2P853453           | 16067551 | G | 0   | 0.2857 | A |
| 6 | BICF2P628214           | 16089943 | C | 0.5 | 0.5714 | A |
| 6 | BICF2P780760           | 16104556 | G | 0.5 | 0.5714 | A |
| 6 | BICF2P199767           | 16124909 | A | 0.5 | 0.5714 | G |
| 6 | BICF2S23152126         | 16136331 | A | 0   | 0.2857 | G |
| 6 | TIGRP2P79230_rs8923886 | 16150143 | A | 0.5 | 0.5714 | G |
| 6 | BICF2P595134           | 16158469 | A | 0   | 0      | G |
| 6 | BICF2P344658           | 16174633 | G | 0   | 0      | A |
| 6 | BICF2S23239556         | 16182604 | A | 1   | 1      | G |
| 6 | TIGRP2P79282_rs9130099 | 16208598 | A | 0.5 | 0.1429 | G |
| 6 | BICF2S23528492         | 16212993 | A | 0   | 0      | G |
| 6 | BICF2S22940954         | 16215859 | A | 0   | 0      | G |
| 6 | BICF2S23756581         | 16228446 | A | 0   | 0.2857 | G |
| 6 | BICF2P1367032          | 16241862 | A | 0   | 0      | G |
| 6 | BICF2P827576           | 16258930 | G | 0.5 | 0.4286 | A |
| 6 | BICF2P165773           | 16272859 | A | 0   | 0.2857 | G |
| 6 | TIGRP2P79322_rs8867438 | 16289391 | G | 0.5 | 0.4286 | A |
| 6 | TIGRP2P79333_rs9029093 | 16301382 | A | 0   | 0.2857 | G |
| 6 | BICF2P400239           | 16307791 | 0 | 0   | 0      | A |
| 6 | BICF2P784872           | 16322416 | G | 0.5 | 0.5714 | A |
| 6 | BICF2S2343695          | 16324133 | A | 0.5 | 0.4286 | G |
| 6 | TIGRP2P79344_rs8800619 | 16330641 | A | 0.5 | 0.5714 | G |
| 6 | BICF2P555431           | 16354148 | A | 0   | 0      | G |
| 6 | BICF2S23317698         | 16365019 | A | 0   | 0      | G |
| 6 | TIGRP2P79364_rs9150499 | 16378187 | A | 0   | 0      | G |
| 6 | BICF2S23552717         | 16390250 | A | 0.5 | 0.5714 | G |
| 6 | TIGRP2P79374_rs8668113 | 16403085 | G | 0   | 0      | A |
| 6 | BICF2G630165635        | 16414778 | G | 0.5 | 0.4286 | A |
| 6 | TIGRP2P79384_rs9045956 | 16431799 | A | 0   | 0.2857 | G |
| 6 | TIGRP2P79385_rs8578665 | 16444942 | A | 0   | 0      | G |
| 6 | TIGRP2P79391_rs9078044 | 16448688 | G | 1   | 0.7143 | A |
| 6 | BICF2S23759798         | 16468281 | A | 0.5 | 0.5714 | T |
| 6 | BICF2G630165643        | 16490083 | A | 0   | 0      | G |
| 6 | BICF2P97044            | 16494557 | 0 | 0   | 0      | C |
| 6 | BICF2S23512744         | 16505342 | A | 0.5 | 0.5714 | G |

|   |                        |          |   |     |        |   |
|---|------------------------|----------|---|-----|--------|---|
| 6 | BICF2S23763361         | 16525764 | G | 0   | 0      | A |
| 6 | BICF2S23522180         | 16551518 | A | 0.5 | 0.5714 | C |
| 6 | BICF2G630165645        | 16566020 | A | 0   | 0      | C |
| 6 | BICF2G630165647        | 16613871 | G | 0.5 | 0.5714 | A |
| 6 | BICF2G630165648        | 16628155 | C | 0   | 0      | G |
| 6 | BICF2P929328           | 16655852 | 0 | 0   | 0      | C |
| 6 | BICF2G630165650        | 16675347 | G | 0   | 0      | C |
| 6 | BICF2S23160764         | 16691730 | G | 0.5 | 0.5714 | A |
| 6 | BICF2S23226142         | 16708680 | A | 0   | 0      | G |
| 6 | TIGRP2P79394_rs8798240 | 16713868 | 0 | 0   | 0      | A |
| 6 | BICF2S22924787         | 16752333 | G | 0   | 0      | A |
| 6 | BICF2S22943322         | 16756215 | A | 0   | 0      | C |
| 6 | BICF2G630165656        | 16776444 | A | 0   | 0      | G |
| 6 | BICF2S23910889         | 16799199 | 0 | 0   | 0      | C |
| 6 | BICF2S2312649          | 16806629 | A | 0   | 0.2857 | G |
| 6 | G380f50S157            | 16834845 | 0 | 0   | 0      | G |
| 6 | BICF2P715806           | 16865215 | 0 | 0   | 0      | G |
| 6 | BICF2G630165660        | 16875303 | G | 0   | 0      | A |
| 6 | BICF2S23521560         | 16884945 | A | 0   | 0.2857 | T |
| 6 | BICF2P1164778          | 16908855 | 0 | 0   | 0      | G |
| 6 | BICF2G630165668        | 16934422 | A | 0   | 0      | G |
| 6 | BICF2S22944684         | 16942840 | A | 0   | 0.2857 | G |
| 6 | BICF2G630165669        | 16953787 | G | 0   | 0      | A |
| 6 | BICF2S2301462          | 16964247 | G | 0   | 0      | A |
| 6 | BICF2S2354357          | 16976104 | A | 0   | 0.2857 | G |
| 6 | BICF2P1472860          | 17012814 | 0 | 0   | 0      | A |
| 6 | BICF2G630165674        | 17020287 | A | 0   | 0      | C |
| 6 | BICF2S23635374         | 17039225 | G | 0   | 0.2857 | A |
| 6 | BICF2G630165678        | 17054152 | A | 0   | 0      | G |
| 6 | BICF2P318931           | 17061368 | A | 0   | 0.2857 | G |
| 6 | BICF2P1180369          | 17068771 | A | 0   | 0      | C |
| 6 | BICF2G630165703        | 17079014 | A | 0   | 0      | G |
| 6 | BICF2G630165720        | 17110138 | G | 0.5 | 0.4286 | A |
| 6 | BICF2G630165728        | 17115716 | C | 0.5 | 0.4286 | A |
| 6 | BICF2G630165737        | 17122209 | G | 0.5 | 0.1429 | A |
| 6 | BICF2G630165741        | 17127356 | A | 0.5 | 0.5714 | G |
| 6 | BICF2S23132116         | 17144593 | A | 0.5 | 0.1429 | G |
| 6 | BICF2G630165762        | 17150874 | C | 0.5 | 0.1429 | A |
| 6 | TIGRP2P79422_rs9090197 | 17158066 | A | 0.5 | 0.4167 | G |
| 6 | BICF2G630165780        | 17170470 | A | 0.5 | 0.1429 | C |
| 6 | BICF2G630165797        | 17191981 | G | 0   | 0      | A |
| 6 | BICF2G630165801        | 17193336 | A | 0.5 | 0.1429 | G |
| 6 | BICF2G630165819        | 17205014 | A | 0   | 0      | G |
| 6 | TIGRP2P79424_rs8626030 | 17220142 | 0 | 0   | 0      | A |
| 6 | BICF2G630165821        | 17228477 | C | 0   | 0      | G |
| 6 | BICF2S23659882         | 17261356 | G | 0   | 0      | A |
| 6 | BICF2G630165837        | 17277156 | G | 0.5 | 0.3571 | A |

|   |                        |          |   |     |        |   |
|---|------------------------|----------|---|-----|--------|---|
| 6 | BICF2G630165856        | 17290324 | 0 | 0   | 0      | A |
| 6 | BICF2G630165862        | 17297859 | 0 | 0   | 0      | G |
| 6 | BICF2G630165886        | 17312223 | C | 0   | 0      | G |
| 6 | TIGRP2P79437_rs8609967 | 17319063 | G | 0.5 | 0.3571 | A |
| 6 | BICF2P919938           | 17340435 | A | 0   | 0      | C |
| 6 | BICF2P312896           | 17347072 | A | 0   | 0      | G |
| 6 | BICF2P901872           | 17357797 | G | 0   | 0      | A |
| 6 | BICF2P562790           | 17367263 | A | 0.5 | 0.3571 | G |
| 6 | BICF2S22956235         | 17380274 | G | 0   | 0      | A |
| 6 | BICF2P265325           | 17390573 | 0 | 0   | 0      | A |
| 6 | BICF2P674111           | 17403253 | 0 | 0   | 0      | G |
| 6 | TIGRP2P79459_rs8564038 | 17422982 | 0 | 0   | 0      | C |
| 6 | BICF2S2454777          | 17474264 | 0 | 0   | 0      | G |
| 6 | BICF2P941394           | 17484263 | A | 0   | 0      | G |
| 6 | BICF2G630165901        | 17492311 | C | 0   | 0      | G |
| 6 | TIGRP2P79467_rs8877073 | 17516247 | 0 | 0   | 0      | G |
| 6 | BICF2G630165903        | 17539533 | G | 0   | 0.2143 | A |
| 6 | TIGRP2P79473_rs8518325 | 17551545 | A | 0   | 0.2143 | G |
| 6 | BICF2P912757           | 17555554 | G | 0   | 0.2143 | A |
| 6 | BICF2S2313369          | 17574911 | 0 | 0   | 0      | G |
| 6 | BICF2G630165911        | 17587132 | A | 0   | 0.2143 | G |
| 6 | BICF2P564916           | 17612433 | 0 | 0   | 0      | C |
| 6 | BICF2P545657           | 17624764 | 0 | 0   | 0      | G |
| 6 | BICF2P511818           | 17648460 | 0 | 0   | 0      | G |
| 6 | TIGRP2P79484_rs9117238 | 17665587 | 0 | 0   | 0      | C |
| 6 | BICF2S22916016         | 17679529 | G | 0   | 0      | A |
| 6 | TIGRP2P79493_rs9197881 | 17687738 | A | 0   | 0      | G |
| 6 | TIGRP2P79495_rs9237040 | 17706161 | A | 0   | 0      | G |
| 6 | BICF2P942186           | 17719675 | A | 0.5 | 0.4286 | G |
| 6 | BICF2S23443954         | 17730208 | G | 0   | 0      | A |
| 6 | BICF2S2413592          | 17733307 | 0 | 0   | 0      | C |
| 6 | BICF2P1347596          | 17744160 | A | 0   | 0      | G |
| 6 | TIGRP2P79505_rs8813150 | 17746922 | A | 0   | 0      | G |
| 6 | BICF2G630165933        | 17762563 | G | 0   | 0.2143 | A |
| 6 | BICF2S2358041          | 17776232 | 0 | 0   | 0      | G |
| 6 | BICF2P527851           | 17797306 | 0 | 0   | 0      | G |
| 6 | BICF2S2377546          | 17807268 | 0 | 0   | 0      | G |
| 6 | BICF2P985283           | 17845902 | G | 0   | 0      | A |
| 6 | BICF2G630165939        | 17848411 | A | 0   | 0.2143 | G |
| 6 | BICF2G630165945        | 17864553 | G | 1   | 0.7857 | A |
| 6 | BICF2P674567           | 17874297 | A | 0   | 0      | G |
| 6 | BICF2G630165981        | 17894209 | G | 1   | 0.7857 | A |
| 6 | TIGRP2P79523_rs8785657 | 17906042 | 0 | 0   | 0      | C |
| 6 | BICF2P199049           | 17923386 | G | 0   | 0      | A |
| 6 | BICF2G630165989        | 17930754 | A | 0   | 0      | G |
| 6 | BICF2G630165999        | 17943765 | A | 0   | 0      | G |
| 6 | BICF2G630166002        | 17951795 | C | 0   | 0      | A |

|   |                        |          |   |     |        |   |
|---|------------------------|----------|---|-----|--------|---|
| 6 | BICF2G630166016        | 17969354 | G | 0   | 0      | C |
| 6 | BICF2G630166022        | 17978221 | A | 0   | 0      | G |
| 6 | BICF2G630166034        | 17989651 | A | 0   | 0      | G |
| 6 | BICF2G630166047        | 18006680 | G | 0   | 0      | C |
| 6 | BICF2P1044897          | 18009325 | A | 0   | 0      | G |
| 6 | BICF2G630166051        | 18029837 | G | 0   | 0.2143 | A |
| 6 | BICF2G630166053        | 18040666 | G | 0   | 0.2143 | A |
| 6 | BICF2S23632271         | 18053959 | G | 0   | 0      | A |
| 6 | BICF2G630166056        | 18057377 | G | 0   | 0.2143 | A |
| 6 | BICF2G630166058        | 18069332 | A | 0   | 0      | G |
| 6 | BICF2S22957410         | 18078772 | G | 0   | 0      | C |
| 6 | BICF2G630166094        | 18100384 | G | 0   | 0.2143 | A |
| 6 | BICF2G630166095        | 18100509 | G | 0   | 0      | A |
| 6 | BICF2G630166121        | 18108213 | A | 0   | 0      | G |
| 6 | BICF2G630166128        | 18118076 | A | 0   | 0      | G |
| 6 | BICF2G630166135        | 18128222 | A | 0   | 0      | G |
| 6 | BICF2P107821           | 18140217 | 0 | 0   | 0      | C |
| 6 | TIGRP2P79533_rs8725946 | 18166461 | 0 | 0   | 0      | C |
| 6 | BICF2P916100           | 18171869 | 0 | 0   | 0      | A |
| 6 | BICF2G630166141        | 18191899 | A | 1   | 1      | G |
| 6 | BICF2G630166142        | 18193815 | C | 1   | 1      | A |
| 6 | BICF2G630166164        | 18210957 | G | 1   | 1      | A |
| 6 | BICF2G630166174        | 18214638 | G | 1   | 0.7857 | A |
| 6 | BICF2G630166178        | 18223109 | G | 1   | 1      | A |
| 6 | BICF2G630166187        | 18234420 | A | 1   | 1      | G |
| 6 | BICF2G630166193        | 18240385 | C | 1   | 1      | A |
| 6 | BICF2G630166209        | 18255445 | G | 0   | 0.2143 | A |
| 6 | BICF2G630166227        | 18264435 | G | 0   | 0      | A |
| 6 | BICF2P730611           | 18280695 | A | 0.5 | 0.2143 | G |
| 6 | BICF2S23548789         | 18292481 | A | 0   | 0      | G |
| 6 | BICF2G630166285        | 18296716 | G | 0.5 | 0.2143 | A |
| 6 | BICF2G630166298        | 18308388 | A | 0   | 0      | G |
| 6 | BICF2G630166303        | 18323456 | A | 0   | 0      | G |
| 6 | BICF2P775622           | 18339882 | G | 0.5 | 0.5714 | A |
| 6 | BICF2G630166315        | 18351358 | A | 0.5 | 0.2143 | G |
| 6 | BICF2P641294           | 18360511 | A | 0   | 0      | G |
| 6 | BICF2G630166353        | 18375060 | A | 0   | 0      | G |
| 6 | BICF2G630166366        | 18387605 | G | 0.5 | 0.2143 | A |
| 6 | BICF2G630166370        | 18396595 | G | 0.5 | 0.2143 | A |
| 6 | BICF2G630166371        | 18399156 | C | 0.5 | 0.2143 | G |
| 6 | BICF2G630166376        | 18406220 | A | 0.5 | 0.2143 | G |
| 6 | BICF2G630166380        | 18413153 | A | 0.5 | 0.1667 | G |
| 6 | TIGRP2P79555_rs8757162 | 18424319 | C | 1   | 0.7857 | A |
| 6 | TIGRP2P79558_rs8831227 | 18436038 | G | 0.5 | 0.2143 | C |
| 6 | BICF2P434856           | 18454226 | G | 0.5 | 0.5714 | A |
| 6 | BICF2P693564           | 18466722 | A | 0   | 0      | G |
| 6 | BICF2S23330041         | 18471383 | A | 0.5 | 0.2143 | G |

|   |                        |          |   |     |        |   |
|---|------------------------|----------|---|-----|--------|---|
| 6 | BICF2S23421211         | 18481025 | A | 0.5 | 0.2143 | G |
| 6 | TIGRP2P79578_rs8553201 | 18498495 | A | 0   | 0      | G |
| 6 | BICF2P966934           | 18503927 | G | 1   | 0.7857 | A |
| 6 | BICF2G630166456        | 18517258 | A | 0   | 0      | C |
| 6 | BICF2G630166462        | 18526820 | A | 0   | 0      | G |
| 6 | BICF2G630166482        | 18540236 | A | 0.5 | 0.2143 | T |
| 6 | BICF2G630166509        | 18553724 | A | 0.5 | 0.2143 | G |
| 6 | BICF2G630166528        | 18561175 | A | 0.5 | 0.4286 | G |
| 6 | BICF2G630166536        | 18576119 | G | 0.5 | 0.4286 | A |
| 6 | BICF2G630166569        | 18590229 | A | 0   | 0.2143 | G |
| 6 | BICF2P497579           | 18601292 | A | 0.5 | 0.2143 | G |
| 6 | BICF2G630726239        | 18617019 | A | 0.5 | 0.7857 | C |
| 6 | BICF2P1090035          | 18620404 | G | 0.5 | 0.7857 | A |
| 6 | BICF2P1284279          | 18641128 | A | 0   | 0.2143 | G |
| 6 | BICF2P549414           | 18646599 | G | 1   | 1      | A |
| 6 | BICF2P158390           | 18657214 | A | 0   | 0.2143 | G |
| 6 | BICF2S23011665         | 18673032 | A | 0.5 | 0.5714 | C |
| 6 | BICF2S23217442         | 18682251 | T | 0   | 0      | A |
| 6 | BICF2S23519373         | 18692017 | G | 0.5 | 0.4286 | A |
| 6 | BICF2P1318132          | 18701219 | A | 0   | 0      | G |
| 6 | BICF2P31296            | 18720516 | A | 0   | 0      | G |
| 6 | BICF2P31297            | 18721121 | A | 0   | 0      | G |
| 6 | BICF2P31299            | 18722749 | A | 1   | 1      | G |
| 6 | BICF2S23348453         | 18738136 | A | 0.5 | 0.5833 | G |
| 6 | BICF2P882584           | 18749183 | A | 0.5 | 0.5714 | G |
| 6 | BICF2S2291996          | 18760582 | A | 0.5 | 0.5714 | G |
| 6 | BICF2S23213167         | 18772702 | G | 0   | 0.2143 | C |
| 6 | BICF2P942266           | 18788832 | G | 1   | 0.7857 | A |
| 6 | BICF2P526875           | 18800881 | A | 0.5 | 0.2143 | G |
| 6 | BICF2S2346466          | 18809942 | A | 0.5 | 0.5714 | G |
| 6 | BICF2P490505           | 18825154 | A | 0.5 | 0.5714 | G |
| 6 | BICF2S2348808          | 18834342 | A | 0.5 | 0.5714 | G |
| 6 | BICF2P758806           | 18834832 | A | 0   | 0      | G |
| 6 | BICF2S2348668          | 18837854 | A | 0.5 | 0.5714 | G |
| 6 | BICF2P516901           | 18850429 | A | 0.5 | 0.2143 | G |
| 6 | BICF2P183784           | 18863322 | A | 0.5 | 0.2143 | G |
| 6 | BICF2P603747           | 18865639 | A | 0.5 | 0.2143 | G |
| 6 | BICF2P1117531          | 18878983 | G | 0.5 | 0.2143 | A |
| 6 | BICF2S23320553         | 18887178 | 0 | 0   | 0      | G |
| 6 | BICF2P1470616          | 18901385 | A | 0.5 | 0.7857 | C |
| 6 | BICF2P636274           | 18910212 | A | 0.5 | 0.7857 | G |
| 6 | BICF2P1258050          | 18926358 | G | 0.5 | 0.7857 | A |
| 6 | BICF2P641063           | 18929706 | C | 0.5 | 0.2143 | A |
| 6 | BICF2S23445502         | 18951433 | A | 1   | 1      | G |
| 6 | BICF2P215635           | 18958337 | G | 1   | 1      | A |
| 6 | BICF2S23746091         | 18963790 | G | 0.5 | 0.5714 | A |
| 6 | BICF2P1291928          | 18997571 | G | 0   | 0.2143 | A |



|   |                 |          |   |     |        |   |
|---|-----------------|----------|---|-----|--------|---|
| 6 | BICF2S23027519  | 19008473 | A | 0   | 0      | G |
| 6 | BICF2P534126    | 19019631 | A | 0.5 | 0.7857 | C |
| 6 | BICF2P976752    | 19021368 | A | 0   | 0.2143 | G |
| 6 | BICF2P442186    | 19029758 | A | 0   | 0.2143 | G |
| 6 | BICF2P1261613   | 19032658 | G | 0   | 0.2143 | A |
| 6 | BICF2P806453    | 19044420 | A | 0   | 0.2143 | G |
| 6 | BICF2P306800    | 19058985 | T | 0.5 | 0.7857 | A |
| 6 | BICF2P516779    | 19070909 | A | 0.5 | 0.7857 | G |
| 6 | BICF2P1421595   | 19093841 | A | 0.5 | 0.7857 | G |
| 6 | BICF2G630726231 | 19105822 | G | 0.5 | 0.7857 | A |
| 6 | BICF2G630726209 | 19123343 | G | 0.5 | 0.7857 | A |
| 6 | BICF2G630726206 | 19130145 | G | 0.5 | 0.7857 | A |
| 6 | BICF2P1238222   | 19140294 | A | 0.5 | 0.2143 | C |
| 6 | BICF2P1256373   | 19148366 | G | 0.5 | 0.2143 | A |
| 6 | BICF2S23726297  | 19160610 | G | 0   | 0      | A |
| 6 | BICF2G630726201 | 19178071 | A | 0   | 0.2143 | G |
| 6 | BICF2P720754    | 19184163 | G | 0   | 0      | A |
| 6 | BICF2P385680    | 19194566 | G | 0   | 0      | A |
| 6 | BICF2P150288    | 19207177 | 0 | 0   | 0      | C |
| 6 | BICF2P1176185   | 19224356 | A | 0   | 0.2143 | G |
| 6 | BICF2G630726184 | 19237408 | G | 0   | 0.2143 | A |
| 6 | BICF2G630726183 | 19240502 | A | 0   | 0.2143 | G |
| 6 | BICF2G630726171 | 19255556 | A | 0.5 | 0.7857 | G |
| 6 | BICF2G630726170 | 19255686 | 0 | 0   | 0      | G |
| 6 | BICF2P643323    | 19273069 | G | 0   | 0      | A |
| 6 | BICF2G630726153 | 19274049 | G | 0   | 0      | A |
| 6 | BICF2P453903    | 19286116 | A | 0   | 0      | G |
| 6 | BICF2P257899    | 19297809 | C | 0   | 0.2143 | A |
| 6 | BICF2G630726138 | 19311714 | G | 0.5 | 0.2143 | A |
| 6 | BICF2P1434901   | 19329301 | A | 0.5 | 0.4286 | G |
| 6 | BICF2P529830    | 19334460 | G | 0.5 | 0.5714 | A |
| 6 | BICF2P1442414   | 19349108 | A | 0.5 | 0.2143 | T |
| 6 | BICF2P807878    | 19355903 | A | 0   | 0      | G |
| 6 | BICF2P321827    | 19373311 | G | 0   | 0      | A |
| 6 | BICF2P386169    | 19382129 | C | 0   | 0.2143 | A |
| 6 | BICF2S2337499   | 19392703 | G | 0   | 0      | A |
| 6 | BICF2S23729483  | 19404264 | G | 0   | 0      | A |
| 6 | BICF2P1264689   | 19439834 | A | 0   | 0      | G |
| 6 | BICF2P1171217   | 19449922 | A | 0   | 0      | G |
| 6 | BICF2P1270390   | 19461924 | G | 1   | 1      | A |
| 6 | BICF2S2315404   | 19480498 | G | 0   | 0      | A |
| 6 | BICF2P310535    | 19484630 | 0 | 0   | 0      | C |
| 6 | BICF2P398199    | 19503467 | A | 0   | 0      | C |
| 6 | BICF2S23628785  | 19512803 | G | 0.5 | 0.2143 | A |
| 6 | BICF2P699169    | 19517085 | G | 0   | 0      | C |
| 6 | BICF2P919791    | 19528152 | C | 0   | 0      | A |
| 6 | BICF2P1241073   | 19543427 | G | 0.5 | 0.2143 | A |

|   |                        |          |   |     |        |   |
|---|------------------------|----------|---|-----|--------|---|
| 6 | BICF2S23030024         | 19555140 | A | 0   | 0      | G |
| 6 | BICF2P255639           | 19559599 | A | 0   | 0.2143 | C |
| 6 | BICF2P583173           | 19573929 | A | 0   | 0      | G |
| 6 | BICF2P1215116          | 19588207 | A | NA  | 0.7857 | C |
| 6 | BICF2P195090           | 19598328 | A | 0   | 0      | G |
| 6 | BICF2P692076           | 19608012 | A | 0   | 0      | G |
| 6 | BICF2P1210099          | 19613971 | A | 0   | 0      | C |
| 6 | BICF2S23146375         | 19626595 | G | 0.5 | 0.2143 | A |
| 6 | BICF2S23639066         | 19635916 | A | 0   | 0      | C |
| 6 | BICF2S23434277         | 19661337 | C | 1   | 1      | G |
| 6 | BICF2S23552358         | 19667892 | G | NA  | 1      | A |
| 6 | BICF2P748460           | 19681602 | A | 1   | 1      | G |
| 6 | BICF2P1168691          | 19691978 | A | 0   | 0      | G |
| 6 | BICF2P1318500          | 19702295 | G | 0   | 0      | A |
| 6 | BICF2S22931981         | 19711056 | G | 0   | 0      | A |
| 6 | BICF2P977673           | 19749873 | T | 0   | 0      | A |
| 6 | BICF2S23437217         | 19767947 | A | 1   | 1      | G |
| 6 | TIGRP2P79914_rs9050518 | 19768501 | A | 0.5 | 0.5714 | G |
| 6 | BICF2P508954           | 19784746 | A | 0   | 0      | G |
| 6 | BICF2P811960           | 19792153 | A | 0   | 0      | G |
| 6 | BICF2P811961           | 19792249 | C | 0   | 0      | A |
| 6 | BICF2P452172           | 19804263 | 0 | 0   | 0      | C |
| 6 | BICF2P149504           | 19837019 | G | 0.5 | 0.4286 | C |
| 6 | BICF2P8975             | 19850034 | 0 | 0   | 0      | T |
| 6 | BICF2S23445794         | 19905378 | A | 0.5 | 0.2857 | C |
| 6 | BICF2P284371           | 19909554 | A | 0   | 0      | G |
| 6 | BICF2P208890           | 19934438 | A | 0   | 0      | G |
| 6 | BICF2P1464259          | 19952437 | A | 0.5 | 0.2143 | G |
| 6 | BICF2P171851           | 19954823 | 0 | 0   | 0      | C |
| 6 | BICF2P938684           | 19964751 | 0 | 0   | 0      | A |
| 6 | BICF2P586763           | 19983637 | G | 0.5 | 0.7143 | A |
| 6 | BICF2P640167           | 19989766 | G | 0.5 | 0.5    | A |
| 6 | BICF2P1022622          | 20009862 | T | 0.5 | 0.2857 | A |
| 6 | BICF2P843371           | 20010124 | A | 0.5 | 0.2857 | G |
| 6 | BICF2P538740           | 20021592 | A | 0   | 0      | G |
| 6 | BICF2P988051           | 20060523 | 0 | 0   | 0      | G |
| 6 | BICF2P888273           | 20070983 | 0 | 0   | 0      | C |
| 6 | BICF2P23991            | 20090372 | A | 0.5 | 0.7143 | G |
| 6 | BICF2P920657           | 20096792 | A | 0.5 | 0.2857 | G |
| 6 | BICF2P276290           | 20108289 | G | 0.5 | 0.4286 | A |
| 6 | BICF2P1154158          | 20118516 | A | 0   | 0      | G |
| 6 | BICF2P940453           | 20126054 | G | 0   | 0      | A |
| 6 | BICF2P576269           | 20132645 | G | 0.5 | 0.7143 | A |
| 6 | BICF2P1088608          | 20141344 | 0 | 0   | 0      | G |
| 6 | TIGRP2P79685_rs8677021 | 20152777 | A | 0.5 | 0.2143 | C |
| 6 | TIGRP2P79684_rs8926829 | 20168013 | A | 0   | 0.2857 | G |
| 6 | BICF2P1126805          | 20174245 | A | 0.5 | 0.2857 | G |

|   |                        |          |   |     |        |   |
|---|------------------------|----------|---|-----|--------|---|
| 6 | BICF2P316204           | 20192754 | A | 0   | 0      | G |
| 6 | BICF2P404373           | 20202557 | G | 0   | 0.2857 | A |
| 6 | BICF2P1024392          | 20215306 | 0 | 0   | 0      | G |
| 6 | BICF2S23612366         | 20223548 | A | 0   | 0.2857 | C |
| 6 | BICF2P955749           | 20228747 | 0 | 0   | 0      | C |
| 6 | TIGRP2P79670_rs8580717 | 20249732 | C | 0   | 0      | A |
| 6 | BICF2P676753           | 20254743 | G | 0   | 0      | A |
| 6 | TIGRP2P79669_rs8732764 | 20282836 | 0 | 0   | 0      | G |
| 6 | BICF2P1281363          | 20308928 | G | 0   | 0      | A |
| 6 | BICF2P1281360          | 20309555 | G | 0   | 0      | A |
| 6 | BICF2P1420142          | 20341715 | A | 0.5 | 0.2143 | G |
| 6 | BICF2P469015           | 20354766 | A | 0.5 | 0.2143 | G |
| 6 | TIGRP2P79666_rs8902600 | 20383136 | C | 0.5 | 0.2143 | G |
| 6 | BICF2P1410895          | 20399776 | A | 0   | 0      | C |
| 6 | TIGRP2P79656_rs8723233 | 20403659 | 0 | 0   | 0      | G |
| 6 | BICF2S23764035         | 20427246 | A | 0   | 0      | G |
| 6 | TIGRP2P79654_rs9051450 | 20435662 | 0 | 0   | 0      | C |
| 6 | BICF2P1187572          | 20457244 | 0 | 0   | 0      | C |
| 6 | BICF2P173328           | 20462398 | 0 | 0   | 0      | C |
| 6 | BICF2S23141776         | 20482746 | A | 1   | 0.5    | G |
| 6 | BICF2P682790           | 20518153 | G | 0   | 0.2857 | A |
| 6 | BICF2S23418945         | 20522832 | T | 0   | 0.5    | A |
| 6 | BICF2S23125853         | 20538663 | G | 0   | 0.2857 | A |
| 6 | BICF2P279522           | 20544026 | G | 0   | 0      | A |
| 6 | TIGRP2P79641_rs9161090 | 20556407 | 0 | 0   | 0      | G |
| 6 | BICF2P488953           | 20562877 | A | 0   | 0.2857 | G |
| 6 | BICF2S245493           | 20590990 | G | 0   | 0      | A |
| 6 | BICF2P1214519          | 20600902 | G | 1   | 0.7857 | A |
| 6 | BICF2P628556           | 20608801 | A | 1   | 0.7857 | G |
| 6 | BICF2P1122349          | 20628577 | A | 0   | 0.2857 | G |
| 6 | BICF2P660509           | 20641069 | G | 0   | 0.2857 | A |
| 6 | BICF2P638782           | 20649240 | A | 0   | 0.2143 | G |
| 6 | BICF2P959425           | 20654045 | G | 0   | 0.2857 | A |
| 6 | BICF2P512053           | 20690326 | A | 0   | 0      | G |
| 6 | BICF2P675080           | 20700754 | A | 1   | 0.5    | G |
| 6 | BICF2P1271206          | 20713644 | A | 0   | 0.2857 | G |
| 6 | TIGRP2P79612_rs8876379 | 20729216 | G | 0   | 0.2857 | A |
| 6 | BICF2P1471715          | 20741022 | 0 | 0   | 0      | A |
| 6 | BICF2P990435           | 20748399 | G | 0   | 0.2857 | A |
| 6 | BICF2P116727           | 20757772 | G | 0.5 | 0.7143 | A |
| 6 | BICF2P777060           | 20770313 | A | 0.5 | 0.5714 | G |
| 6 | BICF2P1127288          | 20790620 | A | 0   | 0      | G |
| 6 | BICF2P986665           | 20793706 | G | 0.5 | 0.2857 | A |
| 6 | BICF2S2306548          | 20809704 | A | 0   | 0.2857 | G |
| 6 | TIGRP2P79945_rs8635789 | 20823419 | A | 0.5 | 0.2857 | G |
| 6 | BICF2S23446482         | 20827347 | G | 0   | 0.2143 | A |
| 6 | BICF2S23110188         | 20838176 | G | 0   | 0.2143 | A |

|   |                        |          |   |     |        |   |
|---|------------------------|----------|---|-----|--------|---|
| 6 | TIGRP2P79966_rs8503217 | 20850614 | G | 0.5 | 0.5    | A |
| 6 | BICF2S2325932          | 20925889 | C | 0   | 0.2857 | A |
| 6 | BICF2P658082           | 20934103 | A | 0   | 0      | G |
| 6 | BICF2S23253491         | 20943640 | A | 0.5 | 0.4286 | G |
| 6 | BICF2P54453            | 20955191 | 0 | 0   | 0      | G |
| 6 | G383f22S118            | 20988801 | G | 0.5 | 0.4286 | C |
| 6 | BICF2S22959118         | 21012142 | A | 0.5 | 0.4286 | T |
| 6 | BICF2P1092577          | 21025350 | G | 0   | 0      | A |
| 6 | BICF2S2322474          | 21032372 | A | 0.5 | 0.4286 | G |
| 6 | BICF2P1070150          | 21034377 | G | 0.5 | 0.4286 | A |
| 6 | BICF2P765445           | 21060921 | 0 | 0   | 0      | G |
| 6 | BICF2P856602           | 21074771 | G | 0.5 | 0.5    | A |
| 6 | BICF2P1055311          | 21084056 | A | 0.5 | 0.2143 | G |
| 6 | BICF2P610704           | 21092861 | A | 0.5 | 0.2143 | G |
| 6 | TIGRP2P80010_rs9224131 | 21110584 | G | 0   | 0.1667 | A |
| 6 | BICF2P1185671          | 21119373 | A | 0   | 0.5    | G |
| 6 | BICF2P342724           | 21136662 | 0 | 0   | 0      | A |
| 6 | BICF2P231529           | 21155078 | G | 0.5 | 0.7857 | A |
| 6 | TIGRP2P80029_rs8863419 | 21169957 | G | 0.5 | 0.5    | A |
| 6 | BICF2P66265            | 21179934 | G | 0.5 | 0.5    | A |
| 6 | BICF2P1456652          | 21192353 | 0 | 0   | 0      | G |
| 6 | BICF2P889408           | 21210293 | A | 0   | 0      | G |
| 6 | BICF2P905974           | 21234939 | C | 0.5 | 0.75   | A |
| 6 | BICF2S23058504         | 21252831 | A | 0   | 0      | G |
| 6 | BICF2S23411791         | 21266405 | G | 0.5 | 0.5    | A |
| 6 | BICF2P793039           | 21310983 | G | 0   | 0      | A |
| 6 | BICF2S2455062          | 21330513 | C | 0   | 0      | A |
| 6 | BICF2S23056199         | 21353759 | G | 0   | 0      | A |
| 6 | BICF2P439484           | 21358819 | 0 | 0   | 0      | G |
| 6 | BICF2P408801           | 21368837 | A | 0   | 0      | G |
| 6 | BICF2P816669           | 21383608 | C | 0   | 0      | A |
| 6 | BICF2P1092907          | 21402143 | A | 0   | 0      | G |
| 6 | BICF2S22953650         | 21422688 | A | 0   | 0      | G |
| 6 | BICF2P1397621          | 21430990 | G | 0   | 0.2143 | A |
| 6 | BICF2P510833           | 21438987 | A | 1   | 0.7857 | G |
| 6 | TIGRP2P80097_rs9061518 | 21461664 | G | 0   | 0.2143 | A |
| 6 | BICF2P1379427          | 21471820 | 0 | 0   | 0      | G |
| 6 | BICF2S23521169         | 21475826 | G | 0   | 0.2857 | A |
| 6 | BICF2S23059526         | 21485516 | A | 0.5 | 0.2143 | G |
| 6 | BICF2P356826           | 21501847 | A | 0.5 | 0.5    | C |
| 6 | BICF2P1335555          | 21510867 | A | 0.5 | 0.2857 | G |
| 6 | TIGRP2P80110_rs8777403 | 21531938 | 0 | 0   | 0      | A |
| 6 | BICF2P396913           | 21542146 | 0 | 0   | 0      | C |
| 6 | BICF2S23656452         | 21561096 | C | 0   | 0      | A |
| 6 | BICF2S23453040         | 21564761 | A | 0.5 | 0.4286 | G |
| 6 | TIGRP2P80111_rs9084598 | 21583907 | G | 0.5 | 0.4286 | A |
| 6 | TIGRP2P80114_rs8633526 | 21588227 | A | 0.5 | 0.5714 | G |

|   |                        |          |   |     |        |   |
|---|------------------------|----------|---|-----|--------|---|
| 6 | TIGRP2P80117_rs8818830 | 21615290 | G | 0.5 | 0.4286 | A |
| 6 | BICF2P1304979          | 21625520 | A | 0.5 | 0.5714 | C |
| 6 | TIGRP2P80136_rs8875559 | 21640693 | A | 0.5 | 0.5714 | G |
| 6 | TIGRP2P80140_rs8631555 | 21646978 | G | 0.5 | 0.5714 | A |
| 6 | BICF2P1014709          | 21658584 | 0 | 0   | 0      | C |
| 6 | BICF2P157697           | 21670314 | A | 0.5 | 0.4286 | G |
| 6 | TIGRP2P80144_rs9180125 | 21680750 | A | 0.5 | 0.4286 | G |
| 6 | BICF2S2411183          | 21691864 | A | 1   | 1      | G |
| 6 | BICF2P225105           | 21708159 | G | 0   | 0.2857 | A |
| 6 | BICF2P960220           | 21717456 | G | 0   | 0      | A |
| 6 | TIGRP2P80169_rs8878040 | 21724010 | A | 0   | 0      | T |
| 6 | BICF2P915764           | 21737492 | C | 0   | 0      | A |
| 6 | TIGRP2P80181_rs9233714 | 21757532 | A | 0   | 0      | T |
| 6 | BICF2P730207           | 21770869 | A | 0   | 0      | G |
| 6 | BICF2P827446           | 21781937 | T | 0.5 | 0.5    | A |
| 6 | BICF2P1261365          | 21800213 | G | 0   | 0.5    | A |
| 6 | BICF2P656970           | 21805666 | G | 0   | 0.2143 | A |
| 6 | BICF2S22945285         | 21816463 | G | 0   | 0.5    | A |
| 6 | BICF2P327789           | 21835681 | A | 0   | 0      | G |
| 6 | BICF2P1434054          | 21844179 | A | 0.5 | 0.5    | C |
| 6 | BICF2P963856           | 21857090 | A | 0.5 | 0.7857 | G |
| 6 | BICF2P1056692          | 21868347 | A | 1   | 0.7143 | G |
| 6 | BICF2P1076583          | 21878549 | A | 0.5 | 0.5714 | G |
| 6 | BICF2P843137           | 21892665 | C | 0.5 | 0.5    | A |
| 6 | BICF2P468591           | 21904956 | G | 0   | 0      | A |
| 6 | BICF2P1151032          | 21913612 | A | 0   | 0.2857 | G |
| 6 | BICF2P591588           | 21920236 | C | 0   | 0.2857 | G |
| 6 | BICF2P224894           | 21931008 | G | 0.5 | 0.5    | A |
| 6 | BICF2P1146822          | 21942766 | T | 0   | 0.2857 | A |
| 6 | BICF2P288167           | 21959711 | A | 0   | 0.5    | G |
| 6 | BICF2P265335           | 21973978 | 0 | 0   | 0      | G |
| 6 | BICF2P177560           | 21985339 | A | 0   | 0.2143 | G |
| 6 | TIGRP2P80271_rs8840639 | 21989598 | A | 1   | 0.5    | G |
| 6 | BICF2P1367451          | 21994033 | A | 0   | 0      | G |
| 6 | TIGRP2P80274_rs8849509 | 21999319 | A | 0   | 0      | C |
| 6 | BICF2P1252205          | 22004644 | A | 1   | 0.5    | G |
| 6 | BICF2P567522           | 22019994 | A | 0   | 0      | G |
| 6 | BICF2P822911           | 22042815 | A | 0.5 | 0.7857 | G |
| 6 | BICF2P1256117          | 22054070 | A | 0   | 0.5    | G |
| 6 | BICF2P1198968          | 22066041 | G | 1   | 1      | A |
| 6 | BICF2P127036           | 22068945 | G | 0   | 0.5    | A |
| 6 | BICF2S23511117         | 22089737 | G | 1   | 0.5    | A |
| 6 | BICF2P1508833          | 22100906 | A | 0   | 0      | C |
| 6 | BICF2P583511           | 22105558 | A | 0   | 0      | G |
| 6 | BICF2P827773           | 22121152 | A | 0   | 0      | C |
| 6 | TIGRP2P80294_rs9255675 | 22128687 | C | 1   | 0.5    | A |
| 6 | BICF2P170182           | 22143878 | A | 0.5 | 0.2857 | G |

|   |                        |          |   |     |        |   |
|---|------------------------|----------|---|-----|--------|---|
| 6 | BICF2S22943160         | 22152105 | A | 0.5 | 0.2857 | G |
| 6 | BICF2P287510           | 22166876 | A | 0.5 | 0.5714 | C |
| 6 | BICF2P1313485          | 22173911 | A | 0   | 0.5    | G |
| 6 | BICF2P936056           | 22184017 | A | 0   | 0.5    | G |
| 6 | BICF2S23240806         | 22208975 | G | 0   | 0      | A |
| 6 | BICF2P182491           | 22227637 | G | 0.5 | 0.2143 | A |
| 6 | BICF2P1340920          | 22251314 | A | 0   | 0      | G |
| 6 | BICF2S23615897         | 22255482 | A | 0.5 | 0.7857 | G |
| 6 | BICF2P1196538          | 22272366 | C | 0.5 | 0.7143 | A |
| 6 | BICF2S22940669         | 22274957 | A | 0   | 0.1667 | G |
| 6 | BICF2S23258724         | 22284618 | A | 0   | 0      | G |
| 6 | BICF2P1217429          | 22302942 | G | 0   | 0.2143 | A |
| 6 | BICF2P769637           | 22313239 | G | 0   | 0.1667 | A |
| 6 | BICF2P1415494          | 22324548 | A | 0   | 0.5    | G |
| 6 | BICF2S23339930         | 22335735 | C | 0.5 | 0.2143 | G |
| 6 | BICF2P674727           | 22347967 | G | 0.5 | 0.7143 | A |
| 6 | BICF2S2312894          | 22376644 | A | 1   | 0.7143 | G |
| 6 | BICF2S23441346         | 22383702 | G | 0   | 0      | A |
| 6 | BICF2P1231173          | 22396069 | 0 | 0   | 0      | G |
| 6 | BICF2P1005607          | 22402279 | A | 0.5 | 0.5    | G |
| 6 | BICF2S22929532         | 22413594 | A | 0.5 | 0.5    | G |
| 6 | TIGRP2P80429_rs8779621 | 22435319 | G | 0.5 | 0.7143 | A |
| 6 | BICF2P447760           | 22438521 | A | 0.5 | 0.7143 | G |
| 6 | BICF2S23713344         | 22456706 | 0 | 0   | 0      | G |
| 6 | BICF2S23710871         | 22460298 | G | 0   | 0      | A |
| 6 | BICF2P404773           | 22471857 | G | 0   | 0      | A |
| 6 | BICF2S2297676          | 22488429 | G | 0.5 | 0.5    | A |
| 6 | BICF2S22915561         | 22511728 | A | 0.5 | 0.2857 | G |
| 6 | BICF2P961527           | 22521067 | 0 | 0   | 0      | G |
| 6 | TIGRP2P80452_rs8956890 | 22561295 | G | 0.5 | 0.5714 | A |
| 6 | BICF2P1369027          | 22563604 | 0 | 0   | 0      | C |
| 6 | BICF2P1349962          | 22575317 | A | 1   | 0.5    | G |
| 6 | BICF2P229142           | 22586928 | G | 0.5 | 0.7143 | A |
| 6 | BICF2P1208382          | 22602963 | A | 0   | 0      | G |
| 6 | BICF2P430934           | 22619634 | T | 0   | 0.2857 | A |
| 6 | TIGRP2P80478_rs8892064 | 22625444 | A | 0   | 0.1667 | G |
| 6 | BICF2S2377226          | 22647516 | C | 0   | 0      | A |
| 6 | BICF2P730879           | 22663408 | T | 0   | 0.5    | A |
| 6 | TIGRP2P80500_rs8640278 | 22671288 | C | 0   | 0      | G |
| 6 | TIGRP2P80505_rs8694163 | 22683048 | G | 0   | 0      | A |
| 6 | BICF2P596603           | 22688546 | A | 0   | 0.2857 | G |
| 6 | BICF2P1400688          | 22693213 | A | 0   | 0      | G |
| 6 | BICF2P221871           | 22708628 | A | 1   | 0.5    | G |
| 6 | BICF2P778479           | 22712870 | A | 1   | 0.5    | C |
| 6 | BICF2P755544           | 22730430 | A | 1   | 0.5    | G |
| 6 | BICF2P238948           | 22737598 | C | 1   | 0.5    | A |
| 6 | BICF2P933473           | 22751428 | A | 1   | 0.5    | C |

|   |                        |          |   |     |        |   |
|---|------------------------|----------|---|-----|--------|---|
| 6 | BICF2P626198           | 22767869 | G | 0.5 | 0.2857 | A |
| 6 | BICF2S23748042         | 22782917 | G | 0   | 0      | A |
| 6 | BICF2P1359282          | 22796089 | G | 1   | 0.7143 | C |
| 6 | BICF2P855300           | 22807980 | A | 0.5 | 0.5    | G |
| 6 | BICF2S2442357          | 22815920 | A | 0.5 | 0.7857 | G |
| 6 | BICF2P1147102          | 22817054 | G | 0.5 | 0.7857 | A |
| 6 | BICF2P867806           | 22838199 | G | 0   | 0.25   | A |
| 6 | BICF2S22955543         | 22844453 | A | 0.5 | 0.5714 | G |
| 6 | BICF2P1165582          | 22861769 | T | 0   | 0.2857 | A |
| 6 | BICF2P832452           | 22870775 | A | 0   | 0.2857 | G |
| 6 | TIGRP2P80570_rs9112951 | 22877954 | A | 0.5 | 0.5    | T |
| 6 | BICF2S23312940         | 22885510 | A | 0.5 | 0.4286 | G |
| 6 | BICF2P1036894          | 22891831 | C | 0.5 | 0.5    | G |
| 6 | BICF2P717472           | 22898363 | A | 0   | 0      | G |
| 6 | BICF2P519620           | 22916578 | A | 0   | 0.2857 | G |
| 6 | BICF2P1147939          | 22919033 | A | 1   | 1      | G |
| 6 | BICF2S2349473          | 22931534 | G | 1   | 0.7857 | A |
| 6 | BICF2P1277678          | 22946613 | G | 1   | 1      | A |
| 6 | BICF2S2308419          | 22952282 | A | 0   | 0      | G |
| 6 | BICF2P398154           | 22955113 | G | 0   | 0.2857 | A |
| 6 | BICF2P1402372          | 22965757 | T | 0   | 0.2857 | A |
| 6 | BICF2P847578           | 22998502 | G | 0   | 0      | A |
| 6 | BICF2S23327134         | 23028375 | A | 0.5 | 0.1667 | C |
| 6 | BICF2S23023203         | 23029439 | A | 0.5 | 0.7857 | C |
| 6 | BICF2S23730116         | 23039445 | G | 1   | 1      | A |
| 6 | BICF2P88757            | 23048450 | G | 0.5 | 0.7857 | A |
| 6 | BICF2P177924           | 23050430 | G | 1   | 1      | A |
| 6 | BICF2P599836           | 23052925 | A | 0.5 | 0.7857 | G |
| 6 | BICF2P1040977          | 23062364 | C | 0.5 | 0.5714 | A |
| 6 | BICF2P1008553          | 23067362 | A | 0.5 | 0.2143 | G |
| 6 | BICF2P155392           | 23078751 | G | 0.5 | 0.5714 | A |
| 6 | BICF2P261288           | 23088441 | G | 0.5 | 0.5714 | A |
| 6 | BICF2S23717478         | 23090325 | T | 0   | 0.2143 | A |
| 6 | BICF2P713801           | 23096713 | A | 0.5 | 0.6    | C |
| 6 | BICF2P1186603          | 23104205 | C | 0.5 | 0.7857 | A |
| 6 | BICF2P337494           | 23115373 | G | 0.5 | 0.2143 | A |
| 6 | BICF2S22920764         | 23136875 | 0 | 0   | 0      | G |
| 6 | BICF2P1385199          | 23140368 | G | 0   | 0.5    | A |
| 6 | BICF2P92193            | 23151484 | G | 0   | 0      | A |
| 6 | BICF2P272963           | 23160353 | C | 0   | 0      | A |
| 6 | BICF2P1383149          | 23165771 | A | 0   | 0      | G |
| 6 | BICF2P807460           | 23177930 | A | 0   | 0      | G |
| 6 | BICF2P895074           | 23184965 | G | 0   | 0      | A |
| 6 | BICF2P430603           | 23206728 | A | 0.5 | 0.2857 | G |
| 6 | BICF2P248269           | 23207533 | G | 0.5 | 0.2857 | A |
| 6 | BICF2P164417           | 23220828 | 0 | 0   | 0      | C |
| 6 | BICF2P544911           | 23239069 | 0 | 0   | 0      | T |

|   |                        |          |   |     |        |   |
|---|------------------------|----------|---|-----|--------|---|
| 6 | BICF2S23120661         | 23247787 | A | 1   | 0.7143 | G |
| 6 | BICF2P564616           | 23257649 | G | 0   | 0      | A |
| 6 | BICF2P767435           | 23276974 | A | 1   | 0.5    | G |
| 6 | BICF2S232109           | 23289906 | A | 0.5 | 0.2857 | C |
| 6 | BICF2S2455844          | 23294775 | T | 0   | 0      | A |
| 6 | BICF2P1009202          | 23299427 | A | 0.5 | 0.2857 | G |
| 6 | BICF2P960195           | 23303915 | G | 0   | 0      | A |
| 6 | BICF2P799684           | 23318567 | A | 0.5 | 0.5    | G |
| 6 | BICF2P487163           | 23321575 | A | 0.5 | 0.5    | G |
| 6 | BICF2P735904           | 23326052 | G | 0   | 0      | A |
| 6 | BICF2P453669           | 23340000 | A | 0.5 | 0.2857 | G |
| 6 | BICF2P247749           | 23354453 | 0 | 0   | 0      | C |
| 6 | BICF2S23730820         | 23356530 | A | 0.5 | 0.7143 | G |
| 6 | BICF2P1171190          | 23359520 | A | 0   | 0      | G |
| 6 | BICF2S23120491         | 23367194 | A | 0.5 | 0.7143 | C |
| 6 | BICF2S23530716         | 23373917 | A | 0   | 0      | G |
| 6 | BICF2P699604           | 23379943 | A | 0   | 0      | G |
| 6 | BICF2P108780           | 23388976 | A | 1   | 0.7857 | C |
| 6 | BICF2P766339           | 23392158 | A | 0   | 0.2143 | C |
| 6 | BICF2P220794           | 23405694 | G | 1   | 0.7857 | A |
| 6 | BICF2P762211           | 23416271 | A | 0.5 | 0.5714 | C |
| 6 | BICF2P248923           | 23429457 | A | 0.5 | 0.4286 | G |
| 6 | BICF2S23131259         | 23437046 | G | 0.5 | 0.4286 | A |
| 6 | BICF2P989945           | 23452942 | 0 | 0   | 0      | C |
| 6 | BICF2S2325707          | 23463622 | A | 0   | 0      | G |
| 6 | BICF2S23654624         | 23480507 | C | 0   | 0.2143 | A |
| 6 | BICF2P499606           | 23492059 | A | 0   | 0      | C |
| 6 | BICF2S23133527         | 23498861 | G | 0   | 0      | A |
| 6 | BICF2S23439352         | 23510575 | G | 0.5 | 0.2143 | A |
| 6 | BICF2S23322775         | 23526681 | A | 0   | 0      | C |
| 6 | BICF2P112458           | 23542574 | A | 0.5 | 0.2143 | G |
| 6 | BICF2P205612           | 23549300 | C | 0   | 0      | A |
| 6 | BICF2P329014           | 23555121 | A | 0   | 0      | G |
| 6 | BICF2S2316242          | 23564913 | G | NA  | 0      | A |
| 6 | BICF2P1056304          | 23578055 | A | 0   | 0.5    | C |
| 6 | BICF2S23135724         | 23604145 | T | 0.5 | 0.2857 | A |
| 6 | BICF2P393069           | 23629285 | A | 0   | 0      | G |
| 6 | BICF2S23010122         | 23633365 | A | 0   | 0      | G |
| 6 | TIGRP2P80587_rs9001499 | 23655061 | 0 | 0   | 0      | A |
| 6 | BICF2S22959051         | 23673392 | G | 0.5 | 0.2857 | A |
| 6 | BICF2S23718630         | 23680809 | A | 1   | 0.5    | G |
| 6 | BICF2P1000422          | 23691597 | A | 0.5 | 0.2857 | G |
| 6 | BICF2P268704           | 23702001 | A | 0   | 0      | G |
| 6 | BICF2S23319061         | 23722084 | G | 0.5 | 0.4286 | A |
| 6 | BICF2P1182130          | 23730566 | G | 0.5 | 0.4286 | A |
| 6 | BICF2S23531949         | 23736871 | A | 0.5 | 0.5    | G |
| 6 | BICF2P492430           | 23745927 | G | 1   | 0.5    | A |



|   |                |          |   |     |        |   |
|---|----------------|----------|---|-----|--------|---|
| 6 | BICF2P278457   | 23750398 | G | 0.5 | 0.2857 | A |
| 6 | BICF2P910004   | 23775090 | G | 1   | 0.7143 | A |
| 6 | BICF2P1264202  | 23788358 | A | 1   | 0.5    | G |
| 6 | BICF2S24414619 | 23798643 | G | 1   | 0.5    | A |
| 6 | BICF2P636189   | 23815720 | A | 0   | 0.25   | G |
| 6 | BICF2P162837   | 23824748 | C | 0   | 0.2857 | A |
| 6 | BICF2P393480   | 23837507 | G | 0.5 | 0.7143 | A |
| 6 | BICF2P492438   | 23843445 | G | 0   | 0.2143 | A |
| 6 | BICF2S22950355 | 23856872 | T | 0.5 | 0.2857 | A |
| 6 | BICF2S23162537 | 23865456 | G | 0   | 0      | A |
| 6 | BICF2S23019381 | 23880628 | G | 0.5 | 0.4286 | A |
| 6 | BICF2S23617522 | 23887338 | A | 0   | 0      | G |
| 6 | BICF2P218732   | 23903407 | A | 0.5 | 0.2143 | G |
| 6 | BICF2P1355245  | 23918117 | A | 0.5 | 0.2143 | G |
| 6 | BICF2P1127709  | 23925585 | A | 0.5 | 0.2143 | C |
| 6 | BICF2P1331561  | 23936306 | 0 | 0   | 0      | G |
| 6 | BICF2P1062599  | 23948377 | 0 | 0   | 0      | C |
| 6 | BICF2S23112533 | 23959474 | A | 0.5 | 0.2143 | G |
| 6 | BICF2P176655   | 23979591 | A | 0.5 | 0.2143 | G |
| 6 | BICF2P176652   | 23979786 | A | 0   | 0      | G |
| 6 | BICF2S2369943  | 23997058 | A | 0   | 0      | G |
| 6 | BICF2P1035894  | 24007929 | A | 0   | 0      | G |
| 6 | BICF2P900599   | 24027137 | A | 0   | 0      | G |
| 6 | BICF2S23621198 | 24043394 | A | 0   | 0      | G |
| 6 | BICF2S23448364 | 24057780 | A | 0   | 0      | G |
| 6 | BICF2P911381   | 24058564 | A | 0.5 | 0.2857 | G |
| 6 | BICF2P799365   | 24084340 | G | 0.5 | 0.2857 | A |
| 6 | BICF2P310640   | 24086653 | C | 0   | 0      | A |
| 6 | BICF2P673753   | 24094484 | A | 0   | 0      | G |
| 6 | BICF2P316451   | 24104844 | G | 0   | 0      | A |
| 6 | BICF2P761897   | 24124265 | A | 0   | 0      | G |
| 6 | BICF2S23052895 | 24127792 | A | NA  | 0.25   | G |
| 6 | BICF2P353410   | 24141625 | C | 0   | 0      | A |
| 6 | BICF2S23638052 | 24151703 | A | 0.5 | 0.2857 | G |
| 6 | BICF2P94760    | 24164168 | A | 0   | 0      | G |
| 6 | BICF2P1392321  | 24174549 | C | 0.5 | 0.2857 | A |
| 6 | BICF2S2327858  | 24184877 | A | 0.5 | 0.2857 | G |
| 6 | BICF2P717608   | 24197948 | G | 0.5 | 0.2857 | A |
| 6 | BICF2P304357   | 24209538 | 0 | 0   | 0      | G |
| 6 | BICF2P965091   | 24225895 | 0 | 0   | 0      | G |
| 6 | BICF2S23764437 | 24238036 | C | 0.5 | 0.2143 | A |
| 6 | BICF2P360986   | 24244607 | G | 0   | 0      | A |
| 6 | BICF2P701406   | 24256984 | A | 1   | 0.5    | G |
| 6 | BICF2P195907   | 24265947 | G | 0   | 0      | A |
| 6 | BICF2P264265   | 24284825 | 0 | 0   | 0      | A |
| 6 | BICF2P826082   | 24326333 | A | 0   | 0      | G |
| 6 | BICF2P575251   | 24337169 | A | 0   | 0      | G |

|   |                |          |   |     |        |   |
|---|----------------|----------|---|-----|--------|---|
| 6 | BICF2P1049614  | 24347907 | C | 0   | 0      | G |
| 6 | BICF2S23212685 | 24368835 | A | 0   | 0.2143 | G |
| 6 | BICF2P1241155  | 24382095 | A | 0   | 0      | G |
| 6 | BICF2P45948    | 24401532 | G | 0.5 | 0.5714 | A |
| 6 | BICF2P785593   | 24405526 | A | 1   | 0.7857 | G |
| 6 | BICF2P451245   | 24419953 | A | 0   | 0      | C |
| 6 | BICF2P1058864  | 24426787 | A | 1   | 0.7857 | G |
| 6 | BICF2P1275478  | 24441035 | G | 0   | 0      | A |
| 6 | BICF2P313656   | 24451753 | A | 0   | 0      | G |
| 6 | BICF2S23053171 | 24471954 | G | 0   | 0      | A |
| 6 | BICF2P1397387  | 24475099 | G | 0   | 0      | A |
| 6 | BICF2P961808   | 24498758 | G | 0   | 0      | A |
| 6 | BICF2P473936   | 24509646 | C | 1   | 0.7857 | A |
| 6 | BICF2P756559   | 24522798 | C | 1   | 0.7857 | A |
| 6 | BICF2P1155853  | 24539988 | T | 0.5 | 0.7857 | A |
| 6 | BICF2P666665   | 24542422 | G | 0.5 | 0.7857 | A |
| 6 | BICF2P305201   | 24563276 | G | 0.5 | 0.5    | C |
| 6 | BICF2P640016   | 24570819 | C | 0   | 0.2143 | A |
| 6 | BICF2S24320536 | 24577002 | G | 0.5 | 0.2857 | A |
| 6 | BICF2P1416082  | 24579645 | A | 0.5 | 0.2857 | T |
| 6 | BICF2S2329620  | 24591869 | G | 0.5 | 0.2857 | A |
| 6 | BICF2P448459   | 24604540 | C | 0   | 0.2857 | A |
| 6 | BICF2P1343119  | 24611172 | G | 0.5 | 0.2857 | A |
| 6 | BICF2P982485   | 24624576 | G | 0.5 | 0.75   | A |
| 6 | BICF2S2378529  | 24640527 | G | 0   | 0      | A |
| 6 | BICF2P955237   | 24643742 | A | 0.5 | 0.2857 | G |
| 6 | BICF2S23637231 | 24650553 | A | 0   | 0.2857 | G |
| 6 | BICF2P667970   | 24656459 | A | 0   | 0      | G |
| 6 | BICF2S23134394 | 24675157 | G | 0.5 | 0.2143 | A |
| 6 | BICF2P281266   | 24687326 | A | 0.5 | 0.5714 | C |
| 6 | BICF2P906612   | 24701822 | A | 0   | 0.5    | G |
| 6 | BICF2P1426137  | 24707531 | G | 0.5 | 0.7857 | A |
| 6 | BICF2P661149   | 24724921 | A | 0   | 0.2143 | G |
| 6 | BICF2S23644398 | 24735975 | A | 0   | 0.2143 | G |
| 6 | BICF2P969294   | 24742537 | A | 0   | 0      | G |
| 6 | BICF2S23441551 | 24758279 | C | 0   | 0      | A |
| 6 | BICF2P63017    | 24760122 | G | 0   | 0.2857 | A |
| 6 | BICF2P669531   | 24780252 | A | 0   | 0      | G |
| 6 | BICF2S23055298 | 24791309 | A | 0.5 | 0.4286 | G |
| 6 | BICF2S23055390 | 24795227 | A | 0   | 0      | G |
| 6 | BICF2S23416516 | 24807212 | G | 0.5 | 0.4286 | A |
| 6 | BICF2P763077   | 24817190 | A | 1   | 0.5    | G |
| 6 | BICF2S23137884 | 24832147 | A | 0   | 0      | G |
| 6 | BICF2P543675   | 24846372 | G | 0   | 0      | A |
| 6 | BICF2P1028826  | 24852118 | C | 0.5 | 0.2857 | A |
| 6 | BICF2S23016168 | 24866755 | A | 0   | 0      | G |
| 6 | BICF2S23449922 | 24875516 | A | 0.5 | 0.2143 | G |

|   |                        |          |   |     |        |   |
|---|------------------------|----------|---|-----|--------|---|
| 6 | BICF2P659354           | 24896834 | C | 0.5 | 0.2143 | A |
| 6 | BICF2P452891           | 24898670 | 0 | 0   | 0      | G |
| 6 | BICF2S2329286          | 24919622 | A | 0   | 0.5    | G |
| 6 | BICF2P603046           | 24921857 | A | 0   | 0      | G |
| 6 | BICF2P874868           | 24931768 | A | 0   | 0      | C |
| 6 | BICF2P1202203          | 24940827 | A | 0   | 0      | G |
| 6 | TIGRP2P80615_rs8796947 | 24965196 | 0 | 0   | 0      | A |
| 6 | BICF2P889950           | 24967981 | G | 0.5 | 0.4286 | A |
| 6 | BICF2P943395           | 24985533 | A | 0   | 0      | G |
| 6 | BICF2P1152802          | 25011392 | A | 0   | 0      | G |
| 6 | BICF2S22936820         | 25017590 | G | 0.5 | 0.7143 | A |
| 6 | BICF2P232298           | 25025715 | G | 0.5 | 0.2143 | A |
| 6 | BICF2P619569           | 25041464 | 0 | 0   | 0      | G |
| 6 | BICF2P896198           | 25047261 | 0 | 0   | 0      | A |
| 6 | BICF2P1114903          | 25063728 | G | 0   | 0.5    | C |
| 6 | BICF2P1278464          | 25070193 | 0 | 0   | 0      | A |
| 6 | BICF2S23123703         | 25083936 | A | 0   | 0.2857 | G |
| 6 | BICF2S23629231         | 25103286 | 0 | 0   | 0      | A |
| 6 | BICF2P708967           | 25146897 | A | 0   | 0      | G |
| 6 | BICF2P299319           | 25161185 | G | 0   | 0.5    | A |
| 6 | BICF2P709137           | 25163642 | A | 0   | 0.2143 | C |
| 6 | BICF2P1211155          | 25174415 | G | 0.5 | 0.7857 | C |
| 6 | BICF2S2305513          | 25195196 | G | 0   | 0      | A |
| 6 | BICF2S23253635         | 25196588 | G | 0   | 0.5    | A |
| 6 | BICF2S23014008         | 25219452 | G | 0   | 0.5    | A |
| 6 | BICF2S23011518         | 25223408 | A | 0   | 0      | C |
| 6 | BICF2P1256091          | 25232129 | 0 | 0   | 0      | G |
| 6 | BICF2P318271           | 25243730 | G | 0.5 | 0.2857 | C |
| 6 | BICF2P353285           | 25255725 | G | 0   | 0      | C |
| 6 | BICF2P58303            | 25268838 | 0 | 0   | 0      | C |
| 6 | BICF2P585001           | 25283409 | A | 0   | 0.2143 | C |
| 6 | BICF2S23327463         | 25291185 | A | 0   | 0.2143 | C |
| 6 | BICF2P526182           | 25295621 | A | 0   | 0      | G |
| 6 | BICF2P259466           | 25303566 | G | 0   | 0      | A |
| 6 | BICF2P736504           | 25317872 | A | 0   | 0.2143 | G |
| 6 | BICF2P806165           | 25323560 | G | 0   | 0      | A |
| 6 | BICF2P372909           | 25343732 | 0 | 0   | 0      | C |
| 6 | BICF2P649580           | 25347780 | G | 0   | 0.2143 | A |
| 6 | BICF2P253867           | 25360217 | G | 0   | 0      | A |
| 6 | BICF2S2447033          | 25380362 | G | 0   | 0.2143 | A |
| 6 | BICF2P302510           | 25401566 | G | 0.5 | 0.5    | C |
| 6 | BICF2P262801           | 25413233 | A | 0.5 | 0.5    | G |
| 6 | BICF2S22911256         | 25417598 | C | 0.5 | 0.5    | A |
| 6 | BICF2P635933           | 25425933 | G | 0.5 | 0.2857 | A |
| 6 | BICF2P1105226          | 25437661 | G | 0.5 | 0.5    | A |
| 6 | BICF2P255057           | 25439489 | A | 0   | 0.2143 | G |
| 6 | BICF2S23656103         | 25457771 | G | 0.5 | 0.5    | A |

|   |                        |          |   |     |        |   |
|---|------------------------|----------|---|-----|--------|---|
| 6 | BICF2P1014432          | 25472371 | G | 0.5 | 0.5    | A |
| 6 | BICF2P1212911          | 25489543 | 0 | 0   | 0      | C |
| 6 | BICF2P396755           | 25499073 | A | 0   | 0      | G |
| 6 | BICF2P416030           | 25501594 | A | 0   | 0      | G |
| 6 | BICF2P1362514          | 25511520 | A | 0   | 0      | C |
| 6 | BICF2P887368           | 25521533 | A | 0   | 0.2143 | G |
| 6 | BICF2P716085           | 25550109 | C | 0   | 0      | A |
| 6 | BICF2P252611           | 25556007 | A | 0   | 0.2857 | G |
| 6 | BICF2P130385           | 25564680 | 0 | 0   | 0      | C |
| 6 | BICF2P1440795          | 25578013 | A | 0   | 0      | G |
| 6 | BICF2S23637076         | 25598912 | G | 0   | 0      | A |
| 6 | BICF2S23510273         | 25608826 | G | 0   | 0      | A |
| 6 | BICF2P524687           | 25617813 | A | 0   | 0      | G |
| 6 | BICF2P326907           | 25646074 | A | 0   | 0      | G |
| 6 | BICF2P314717           | 25666078 | A | 0   | 0.2857 | G |
| 6 | BICF2P1384220          | 25673357 | 0 | 0   | 0      | A |
| 6 | BICF2P657290           | 25685826 | A | 0   | 0.2857 | T |
| 6 | BICF2P1061739          | 25691386 | G | 0   | 0.2857 | A |
| 6 | BICF2P1280826          | 25712636 | A | 0   | 0.2857 | G |
| 6 | BICF2S22923866         | 25715121 | A | 0   | 0      | C |
| 6 | TIGRP2P80630_rs8985200 | 25731846 | 0 | 0   | 0      | G |
| 6 | BICF2P301503           | 25740329 | A | 0   | 0      | T |
| 6 | BICF2S23722765         | 25754349 | A | 1   | 0.7143 | G |
| 6 | BICF2S23657929         | 25769618 | A | 0   | 0      | G |
| 6 | BICF2S23540616         | 25772484 | A | 0   | 0      | G |
| 6 | BICF2S23532804         | 25785750 | G | 0   | 0.2857 | A |
| 6 | BICF2S23055056         | 25798400 | A | 0   | 0      | C |
| 6 | BICF2S2357063          | 25815666 | G | 0   | 0.2857 | A |
| 6 | BICF2P1081726          | 25819273 | C | 0.5 | 0.5714 | A |
| 6 | BICF2P401516           | 25826238 | G | NA  | 0.5    | A |
| 6 | BICF2P1058213          | 25829411 | G | 0.5 | 0.2857 | A |
| 6 | BICF2P1436428          | 25841871 | A | 0   | 0      | G |
| 6 | BICF2P1249950          | 25853399 | C | 0   | 0      | A |
| 6 | BICF2P339474           | 25858300 | A | 0   | 0      | G |
| 6 | BICF2P1206542          | 25863855 | 0 | 0   | 0      | G |
| 6 | BICF2S2343483          | 25875949 | A | 0.5 | 0.4286 | G |
| 6 | BICF2P187877           | 25888360 | G | 0.5 | 0.4286 | A |
| 6 | BICF2P372161           | 25900797 | A | 0.5 | 0.4286 | G |
| 6 | TIGRP2P80632_rs9058647 | 25910361 | 0 | 0   | 0      | G |
| 6 | BICF2P186302           | 25921932 | A | 0.5 | 0.4286 | G |
| 6 | TIGRP2P80634_rs9086288 | 25935356 | 0 | 0   | 0      | C |
| 6 | BICF2P168831           | 25953471 | G | 0   | 0.25   | A |
| 6 | BICF2S22911317         | 25966319 | A | 0.5 | 0.4286 | C |
| 6 | BICF2S23728625         | 25977637 | A | 0   | 0      | G |
| 6 | BICF2S23233285         | 25986523 | G | 0.5 | 0.5714 | A |
| 6 | BICF2S23233792         | 25990248 | A | 0   | 0      | G |
| 6 | BICF2S23447666         | 26006339 | 0 | 0   | 0      | A |

|   |                        |          |   |     |        |   |
|---|------------------------|----------|---|-----|--------|---|
| 6 | BICF2P756867           | 26027991 | 0 | 0   | 0      | G |
| 6 | BICF2S22949912         | 26037154 | C | 0   | 0.2857 | A |
| 6 | BICF2P919545           | 26061181 | A | 0.5 | 0.5714 | G |
| 6 | BICF2P536806           | 26082329 | 0 | 0   | 0      | G |
| 6 | BICF2P1456049          | 26097103 | A | 0   | 0.2857 | G |
| 6 | BICF2P1283639          | 26108462 | G | 0   | 0.2857 | A |
| 6 | BICF2P1084186          | 26125572 | G | 0.5 | 0.5714 | A |
| 6 | BICF2P446708           | 26128076 | A | 0.5 | 0.5714 | G |
| 6 | BICF2P943894           | 26141946 | A | 0.5 | 0.5714 | G |
| 6 | BICF2P378451           | 26151474 | A | 0.5 | 0.5714 | G |
| 6 | BICF2S23637794         | 26163376 | C | 0.5 | 0.5714 | A |
| 6 | BICF2P764827           | 26185365 | 0 | 0   | 0      | A |
| 6 | BICF2S2414709          | 26201797 | A | 0   | 0      | G |
| 6 | BICF2S23117697         | 26213732 | G | 0.5 | 0.5714 | A |
| 6 | BICF2S23034247         | 26230979 | A | 0   | 0      | G |
| 6 | BICF2S23246310         | 26265530 | A | 1   | 1      | T |
| 6 | BICF2P1035154          | 26299063 | 0 | 0   | 0      | T |
| 6 | BICF2P1009396          | 26319136 | 0 | 0   | 0      | A |
| 6 | BICF2P1471156          | 26325315 | 0 | 0   | 0      | C |
| 6 | BICF2S23037907         | 26344333 | A | 0   | 0      | G |
| 6 | BICF2S22960526         | 26359180 | G | 0   | 0      | A |
| 6 | BICF2S23036401         | 26389387 | A | 0   | 0      | C |
| 6 | BICF2S23212317         | 26410743 | G | 0.5 | 0.5714 | A |
| 6 | BICF2S23735439         | 26421756 | A | 0.5 | 0.5714 | G |
| 6 | TIGRP2P80642_rs8538069 | 26463664 | 0 | 0   | 0      | A |
| 6 | BICF2S2366962          | 26506128 | A | 0.5 | 0.7143 | C |
| 6 | BICF2S23321662         | 26517892 | A | 0.5 | 0.2857 | G |
| 6 | BICF2S23411908         | 26545462 | G | 0   | 0      | A |
| 6 | BICF2P498378           | 26560796 | 0 | 0   | 0      | G |
| 6 | BICF2P866984           | 26576260 | 0 | 0   | 0      | G |
| 6 | BICF2S2455331          | 26582747 | 0 | 0   | 0      | G |
| 6 | BICF2P1365348          | 26597820 | 0 | 0   | 0      | G |
| 6 | BICF2S22959249         | 26601998 | T | 0   | 0      | A |
| 6 | BICF2S22924180         | 26624552 | G | 0   | 0      | A |
| 6 | BICF2S23353616         | 26641496 | G | 0   | 0      | A |
| 6 | BICF2P1117545          | 26655781 | 0 | 0   | 0      | C |
| 6 | BICF2P1156472          | 26663978 | 0 | 0   | 0      | A |
| 6 | BICF2P83870            | 26683898 | A | 0   | 0      | G |
| 6 | BICF2P894420           | 26704079 | 0 | 0   | 0      | A |
| 6 | G384f30S274            | 26749367 | 0 | 0   | 0      | C |
| 6 | BICF2P541014           | 26787207 | 0 | 0   | 0      | C |
| 6 | BICF2P274200           | 26812642 | C | 0   | 0      | A |
| 6 | BICF2P1033202          | 26819684 | 0 | 0   | 0      | A |
| 6 | BICF2P127824           | 26840601 | G | 0   | 0      | A |
| 6 | BICF2P698604           | 26868447 | G | 0   | 0      | C |
| 6 | BICF2P706527           | 26881144 | A | 0   | 0      | G |
| 6 | BICF2P187851           | 26890469 | G | 0   | 0      | A |

|   |                        |          |   |     |        |   |
|---|------------------------|----------|---|-----|--------|---|
| 6 | BICF2P1263694          | 26917473 | C | 0   | 0      | A |
| 6 | BICF2P1278096          | 26924547 | A | 0   | 0      | C |
| 6 | BICF2P369796           | 26938748 | G | 0   | 0      | A |
| 6 | BICF2P1336628          | 26966586 | A | 0   | 0      | G |
| 6 | BICF2P653938           | 26971119 | G | 0   | 0      | A |
| 6 | BICF2P285670           | 26979226 | 0 | 0   | 0      | G |
| 6 | BICF2P595815           | 26995207 | 0 | 0   | 0      | A |
| 6 | BICF2P402302           | 27004019 | 0 | 0   | 0      | A |
| 6 | BICF2P1139947          | 27008081 | 0 | 0   | 0      | G |
| 6 | BICF2P200611           | 27025761 | 0 | 0   | 0      | A |
| 6 | BICF2P266979           | 27079201 | 0 | 0   | 0      | C |
| 6 | BICF2P505604           | 27086523 | 0 | 0   | 0      | A |
| 6 | BICF2P107406           | 27124771 | 0 | 0   | 0      | A |
| 6 | BICF2P1007943          | 27156668 | 0 | 0   | 0      | C |
| 6 | BICF2P588284           | 27173426 | 0 | 0   | 0      | A |
| 6 | BICF2P754953           | 27184689 | 0 | 0   | 0      | A |
| 6 | BICF2P729785           | 27212714 | 0 | 0   | 0      | G |
| 6 | BICF2P289004           | 27233468 | 0 | 0   | 0      | C |
| 6 | BICF2P334084           | 27255723 | 0 | 0   | 0      | G |
| 6 | BICF2S2291174          | 27267098 | 0 | 0   | 0      | A |
| 6 | BICF2S23611133         | 27285067 | 0 | 0   | 0      | G |
| 6 | BICF2P761076           | 27290070 | A | 0.5 | 0.2857 | C |
| 6 | BICF2P1088357          | 27304538 | 0 | 0   | 0      | A |
| 6 | BICF2P907990           | 27323357 | A | 0   | 0      | G |
| 6 | BICF2S23911581         | 27376247 | G | 0   | 0      | A |
| 6 | BICF2P1087458          | 27385905 | 0 | 0   | 0      | G |
| 6 | G385f21S257            | 27406353 | 0 | 0   | 0      | C |
| 6 | BICF2S230253           | 27428560 | C | 0   | 0      | A |
| 6 | BICF2P303540           | 27458682 | 0 | 0   | 0      | C |
| 6 | BICF2P27420            | 27511198 | C | 0.5 | 0.4286 | A |
| 6 | BICF2P971245           | 27520540 | A | 0.5 | 0.4286 | G |
| 6 | BICF2S23014753         | 27535949 | G | 0.5 | 0.4286 | A |
| 6 | BICF2P508762           | 27544093 | C | 0.5 | 0.4286 | G |
| 6 | BICF2P414711           | 27555000 | G | 0.5 | 0.2857 | A |
| 6 | BICF2P257991           | 27580395 | G | 0.5 | 0.5714 | A |
| 6 | BICF2P437919           | 27590235 | A | 0.5 | 0.5714 | G |
| 6 | BICF2P718776           | 27593605 | A | 0.5 | 0.5714 | G |
| 6 | BICF2P759672           | 27600299 | G | 0.5 | 0.5714 | A |
| 6 | BICF2P1410889          | 27601481 | A | 0.5 | 0.5714 | G |
| 6 | BICF2P90444            | 27618262 | A | NA  | 0.5714 | G |
| 6 | BICF2P716026           | 27623002 | A | 0   | 0      | G |
| 6 | BICF2P1312040          | 27635133 | A | 0   | 0.25   | C |
| 6 | BICF2P1182553          | 27650224 | 0 | 0   | 0      | A |
| 6 | BICF2S23424899         | 27667357 | C | 0   | 0.2857 | A |
| 6 | BICF2P174935           | 27669659 | A | 0   | 0.2857 | C |
| 6 | BICF2S24117176         | 27723200 | 0 | 0   | 0      | C |
| 6 | TIGRP2P80717_rs9253449 | 27727675 | 0 | 0   | 0      | C |

|   |                        |          |   |     |        |   |
|---|------------------------|----------|---|-----|--------|---|
| 6 | BICF2P1327108          | 27755153 | 0 | 0   | 0      | G |
| 6 | BICF2P1331756          | 27791309 | 0 | 0   | 0      | A |
| 6 | BICF2S23652912         | 27825840 | G | 0   | 0      | A |
| 6 | TIGRP2P80803_rs8598256 | 27860481 | 0 | 0   | 0      | G |
| 6 | G386f14S161            | 27880693 | A | 0   | 0      | G |
| 6 | BICF2S23713729         | 27904452 | 0 | 0   | 0      | G |
| 6 | BICF2P967289           | 27921634 | G | 0   | 0      | A |
| 6 | BICF2P114763           | 27926336 | 0 | 0   | 0      | G |
| 6 | BICF2P515434           | 27955410 | 0 | 0   | 0      | A |
| 6 | BICF2S23335435         | 27960374 | G | 0.5 | 0.5714 | A |
| 6 | BICF2S23233208         | 27978635 | 0 | 0   | 0      | G |
| 6 | BICF2S23054602         | 27999134 | T | 0   | 0      | A |
| 6 | BICF2P176230           | 28005160 | 0 | 0   | 0      | A |
| 6 | BICF2S23617758         | 28023064 | A | 0   | 0      | G |
| 6 | BICF2S23031846         | 28070745 | A | 0   | 0      | G |
| 6 | BICF2P811438           | 28074377 | A | 0   | 0      | C |
| 6 | BICF2P940877           | 28092014 | 0 | 0   | 0      | A |
| 6 | BICF2P1468189          | 28126145 | 0 | 0   | 0      | G |
| 6 | G387f48S371            | 28152754 | C | 0   | 0      | A |
| 6 | BICF2P1104199          | 28181913 | 0 | 0   | 0      | G |
| 6 | BICF2P348368           | 28201184 | 0 | 0   | 0      | T |
| 6 | BICF2P384961           | 28265045 | 0 | 0   | 0      | A |
| 6 | BICF2P678912           | 28279447 | 0 | 0   | 0      | A |
| 6 | BICF2P1129268          | 28322447 | 0 | 0   | 0      | A |
| 6 | BICF2P536946           | 28325541 | 0 | 0   | 0      | C |
| 6 | BICF2P638218           | 28342915 | A | 0   | 0      | G |
| 6 | G388f28S192            | 28361904 | G | 0   | 0.2857 | A |
| 6 | BICF2P477959           | 28387382 | 0 | 0   | 0      | G |
| 6 | BICF2S23224133         | 28416738 | A | 0   | 0      | G |
| 6 | BICF2S23618820         | 28436834 | G | 1   | 0.7143 | A |
| 6 | BICF2S23712545         | 28442168 | C | 0   | 0      | G |
| 6 | BICF2P897154           | 28471083 | 0 | 0   | 0      | A |
| 6 | BICF2S23126187         | 28479939 | A | 0   | 0      | G |
| 6 | BICF2P536394           | 28495202 | 0 | 0   | 0      | G |
| 6 | BICF2P280733           | 28500894 | 0 | 0   | 0      | C |
| 6 | BICF2P407684           | 28508637 | 0 | 0   | 0      | G |
| 6 | BICF2P8597             | 28530222 | A | 0   | 0      | G |
| 6 | BICF2P1032507          | 28534122 | G | 1   | 0.7143 | C |
| 6 | BICF2P1032505          | 28534475 | C | 1   | 0.7143 | A |
| 6 | BICF2P1436009          | 28548286 | A | 0   | 0      | G |
| 6 | BICF2P907235           | 28557712 | A | 1   | 0.7143 | G |
| 6 | BICF2P1206103          | 28578732 | G | 0   | 0      | A |
| 6 | BICF2P954348           | 28594291 | A | 0   | 0      | G |
| 6 | BICF2P1431752          | 28608774 | A | 0   | 0      | G |
| 6 | BICF2P1431746          | 28612163 | A | 0   | 0      | G |
| 6 | BICF2S2294961          | 28624934 | C | 0   | 0.2857 | A |
| 6 | BICF2P1399691          | 28640185 | G | 0   | 0.2857 | A |

|   |                        |          |   |   |        |   |
|---|------------------------|----------|---|---|--------|---|
| 6 | BICF2P1134399          | 28646855 | 0 | 0 | 0      | G |
| 6 | BICF2P1069823          | 28669053 | A | 1 | 0.7143 | G |
| 6 | BICF2S23211337         | 28676718 | A | 0 | 0      | G |
| 6 | BICF2S23247346         | 28691044 | G | 0 | 0      | A |
| 6 | BICF2S22942748         | 28694703 | A | 0 | 0      | G |
| 6 | BICF2S2348227          | 28711128 | A | 0 | 0      | G |
| 6 | BICF2P682517           | 28723588 | A | 0 | 0      | G |
| 6 | BICF2P990387           | 28736395 | A | 1 | 0.7143 | G |
| 6 | BICF2P165280           | 28741862 | G | 1 | 0.7143 | A |
| 6 | BICF2S2448495          | 28753894 | A | 0 | 0      | G |
| 6 | BICF2P265761           | 28767134 | G | 0 | 0      | C |
| 6 | BICF2S23247530         | 28773876 | G | 1 | 1      | A |
| 6 | BICF2S23434971         | 28786359 | A | 1 | 1      | G |
| 6 | BICF2P383630           | 28804181 | A | 1 | 1      | G |
| 6 | BICF2P1120940          | 28823083 | 0 | 0 | 0      | G |
| 6 | BICF2P482754           | 28833933 | A | 0 | 0      | G |
| 6 | BICF2P270340           | 28848321 | 0 | 0 | 0      | G |
| 6 | BICF2S23052260         | 28855681 | C | 0 | 0      | A |
| 6 | BICF2P1146913          | 28876243 | A | 0 | 0      | G |
| 6 | BICF2S23044577         | 28884072 | A | 0 | 0      | G |
| 6 | BICF2P716684           | 28889451 | A | 0 | 0      | G |
| 6 | BICF2S23112733         | 28902499 | A | 0 | 0      | G |
| 6 | BICF2P272179           | 28919275 | A | 0 | 0      | G |
| 6 | BICF2P545493           | 28923498 | G | 0 | 0      | A |
| 6 | BICF2P545494           | 28923516 | A | 0 | 0      | G |
| 6 | BICF2P288170           | 28927711 | A | 0 | 0      | G |
| 6 | BICF2P637916           | 28933513 | C | 0 | 0      | G |
| 6 | BICF2S23121085         | 28938587 | A | 0 | 0      | G |
| 6 | TIGRP2P80823_rs9105750 | 28960627 | A | 0 | 0      | C |
| 6 | BICF2P350446           | 28972984 | A | 0 | 0      | G |
| 6 | TIGRP2P80824_rs8805371 | 28989075 | 0 | 0 | 0      | G |
| 6 | BICF2S23439037         | 29004501 | 0 | 0 | 0      | A |
| 6 | BICF2P129894           | 29015864 | G | 0 | 0      | A |
| 6 | BICF2P1327659          | 29047479 | 0 | 0 | 0      | G |
| 6 | BICF2S23152130         | 29078847 | A | 0 | 0      | G |
| 6 | BICF2P649566           | 29093918 | A | 0 | 0.25   | C |
| 6 | BICF2P1095108          | 29113290 | G | 0 | 0      | A |
| 6 | BICF2S2378645          | 29115537 | A | 0 | 0      | T |
| 6 | BICF2P992505           | 29123215 | 0 | 0 | 0      | G |
| 6 | BICF2P333430           | 29130831 | A | 0 | 0      | G |
| 6 | BICF2S22951669         | 29144756 | 0 | 0 | 0      | A |
| 6 | BICF2P1417818          | 29181012 | A | 1 | 0.7143 | G |
| 6 | BICF2P1457574          | 29194916 | G | 0 | 0      | A |
| 6 | BICF2P1313122          | 29205729 | A | 0 | 0      | G |
| 6 | BICF2P930421           | 29211506 | A | 0 | 0      | C |
| 6 | BICF2S22938690         | 29224882 | G | 0 | 0      | A |
| 6 | BICF2P704885           | 29236525 | A | 0 | 0      | G |



|   |                |          |   |     |        |   |
|---|----------------|----------|---|-----|--------|---|
| 6 | BICF2P423478   | 29248457 | A | 0   | 0      | G |
| 6 | BICF2P1167348  | 29258705 | C | 0   | 0      | A |
| 6 | BICF2P254642   | 29267768 | A | 0   | 0      | G |
| 6 | BICF2P1239210  | 29286370 | C | 0   | 0      | A |
| 6 | BICF2P1067537  | 29295101 | A | 0   | 0      | G |
| 6 | BICF2S2341108  | 29307071 | G | 0   | 0      | A |
| 6 | BICF2P1016121  | 29323840 | C | 0   | 0      | A |
| 6 | BICF2P605982   | 29328965 | 0 | 0   | 0      | A |
| 6 | BICF2P1201594  | 29343278 | 0 | 0   | 0      | A |
| 6 | BICF2P365262   | 29356374 | A | 0.5 | 0.2857 | G |
| 6 | BICF2P576464   | 29363433 | C | 0   | 0      | A |
| 6 | BICF2P211746   | 29379193 | T | 0.5 | 0.2857 | A |
| 6 | BICF2P1275401  | 29384655 | G | 0.5 | 0.2857 | A |
| 6 | BICF2S23328313 | 29420944 | C | 0.5 | 0.25   | A |
| 6 | BICF2P1100715  | 29436007 | 0 | 0   | 0      | C |
| 6 | BICF2P667672   | 29442655 | A | 0   | 0.2857 | G |
| 6 | BICF2P439682   | 29459077 | A | 0   | 0.2857 | G |
| 6 | BICF2P484381   | 29470908 | A | 0   | 0.2857 | G |
| 6 | BICF2P1182563  | 29481649 | A | 0   | 0.2857 | G |
| 6 | BICF2P37958    | 29490247 | G | 0.5 | 0.5714 | A |
| 6 | BICF2P1123224  | 29508015 | C | 0   | 0.2857 | A |
| 6 | BICF2P1015466  | 29511282 | C | 0   | 0.2857 | A |
| 6 | BICF2S23443978 | 29541867 | A | 0   | 0.2857 | G |
| 6 | BICF2S23658175 | 29559055 | G | 0   | 0.2857 | A |
| 6 | BICF2P1335505  | 29566400 | A | 0.5 | 0.2857 | G |
| 6 | BICF2P621911   | 29587447 | A | 0.5 | 0.4286 | C |
| 6 | BICF2P678360   | 29594766 | A | 0.5 | 0.2857 | C |
| 6 | BICF2P1425876  | 29597429 | T | 0.5 | 0.2857 | A |
| 6 | BICF2S2316921  | 29604620 | A | 0   | 0.2857 | G |
| 6 | BICF2P918508   | 29619790 | A | 0   | 0      | G |
| 6 | BICF2P906459   | 29632974 | A | 0   | 0      | G |
| 6 | BICF2P596865   | 29645949 | 0 | 0   | 0      | G |
| 6 | G389f25S329    | 29668017 | C | 0   | 0      | A |
| 6 | BICF2P920365   | 29687744 | A | 0   | 0      | G |
| 6 | BICF2P646755   | 29694430 | A | 0.5 | 0.5714 | G |
| 6 | BICF2P1004250  | 29708503 | A | 1   | 0.7143 | G |
| 6 | BICF2P168471   | 29726203 | G | 0   | 0      | C |
| 6 | BICF2P1316323  | 29728523 | A | 0   | 0.2857 | G |
| 6 | BICF2S23759301 | 29748033 | A | 0.5 | 0.4286 | G |
| 6 | BICF2P395778   | 29750867 | G | 0.5 | 0.2857 | A |
| 6 | BICF2P696050   | 29784277 | A | 0.5 | 0.5714 | C |
| 6 | BICF2S23724885 | 29788824 | A | 0   | 0      | G |
| 6 | BICF2S22960534 | 29823320 | G | 0.5 | 0.4286 | A |
| 6 | BICF2P1455640  | 29832894 | A | 0   | 0      | G |
| 6 | BICF2P1018710  | 29843115 | C | 0   | 0      | A |
| 6 | BICF2S229607   | 29862688 | C | 0.5 | 0.5714 | A |
| 6 | BICF2P900547   | 29875599 | C | 0   | 0.2857 | A |

|   |                        |          |   |      |        |   |
|---|------------------------|----------|---|------|--------|---|
| 6 | BICF2P94612            | 29885183 | A | 0.5  | 0.2857 | G |
| 6 | BICF2S23530601         | 29892061 | G | 0.5  | 0.5714 | A |
| 6 | BICF2P195368           | 29901293 | A | 0.5  | 0.2857 | G |
| 6 | BICF2P1266054          | 29922226 | G | 0    | 0      | A |
| 6 | BICF2P622131           | 29928970 | A | 0    | 0      | G |
| 6 | BICF2P1159271          | 29940038 | A | 0    | 0.2857 | G |
| 6 | BICF2P180699           | 29950944 | C | 0.5  | 0.2857 | G |
| 6 | BICF2P1365488          | 29955696 | A | 0    | 0      | G |
| 6 | BICF2P638752           | 29966010 | G | 0.5  | 0.5714 | A |
| 6 | BICF2P594608           | 29979778 | A | 0.5  | 0.2857 | G |
| 6 | BICF2P447605           | 29986161 | A | 0    | 0      | G |
| 6 | BICF2P872463           | 29992635 | A | 0    | 0      | G |
| 6 | BICF2P632743           | 30002668 | G | 0.5  | 0.2857 | A |
| 6 | BICF2P737234           | 30003722 | A | 0    | 0      | G |
| 6 | BICF2P1211036          | 30019861 | A | 1    | 0.7143 | G |
| 6 | BICF2S2342707          | 30032808 | A | 0    | 0.2857 | G |
| 6 | BICF2S22925667         | 30040622 | A | 1    | 0.7143 | G |
| 6 | BICF2P505905           | 30057849 | A | 0    | 0      | G |
| 6 | BICF2S23644328         | 30072136 | A | 0.25 | 0.6429 | G |
| 6 | G390f36S199            | 30100616 | 0 | 0    | 0      | C |
| 6 | BICF2S23528738         | 30125059 | A | 0.5  | 0.7143 | G |
| 6 | BICF2P1408246          | 30131017 | 0 | 0    | 0      | C |
| 6 | BICF2P812428           | 30151745 | T | 0.5  | 0.2857 | A |
| 6 | TIGRP2P80844_rs9030379 | 30155036 | 0 | 0    | 0      | A |
| 6 | BICF2S23447005         | 30168915 | G | 0    | 0      | A |
| 6 | BICF2S22963847         | 30180325 | C | 0    | 0      | A |
| 6 | BICF2P126725           | 30201043 | 0 | 0    | 0      | G |
| 6 | BICF2P424925           | 30216395 | G | 1    | 1      | A |
| 6 | BICF2P891201           | 30222205 | A | 0    | 0      | C |
| 6 | BICF2P394949           | 30234716 | G | 0    | 0      | A |
| 6 | BICF2P796471           | 30237281 | A | 0    | 0      | G |
| 6 | BICF2P1199652          | 30245566 | 0 | 0    | 0      | A |
| 6 | BICF2P49911            | 30259363 | C | 1    | 0.7143 | A |
| 6 | BICF2P367160           | 30268808 | A | 1    | 0.7143 | G |
| 6 | BICF2P1410071          | 30281444 | G | 0    | 0.2857 | A |
| 6 | BICF2P1024427          | 30320968 | G | 0.5  | 0.4286 | A |
| 6 | BICF2P332405           | 30329729 | A | 0    | 0      | G |
| 6 | BICF2P402565           | 30342875 | A | 1    | 1      | G |
| 6 | BICF2P1371467          | 30355315 | G | 0    | 0      | A |
| 6 | BICF2P534120           | 30390022 | A | 0    | 0      | C |
| 6 | TIGRP2P80849_rs9025818 | 30390799 | 0 | 0    | 0      | G |
| 6 | BICF2P148784           | 30395314 | A | 1    | 1      | G |
| 6 | BICF2P163535           | 30414787 | 0 | 0    | 0      | G |
| 6 | BICF2P481067           | 30418905 | 0 | 0    | 0      | A |
| 6 | BICF2P989853           | 30442390 | 0 | 0    | 0      | A |
| 6 | BICF2P137751           | 30464951 | G | 0    | 0      | A |
| 6 | BICF2S23538926         | 30500492 | G | 0    | 0      | A |

|   |                |          |   |     |        |   |
|---|----------------|----------|---|-----|--------|---|
| 6 | BICF2P905484   | 30515147 | C | 0.5 | 0.2857 | G |
| 6 | BICF2S2303270  | 30527416 | G | 0   | 0.2857 | A |
| 6 | BICF2S23230434 | 30547221 | G | 0   | 0      | A |
| 6 | BICF2P1282995  | 30555767 | A | 0   | 0      | G |
| 6 | BICF2P468703   | 30570019 | A | 0   | 0.2857 | C |
| 6 | BICF2P1276861  | 30578724 | A | 1   | 0.7143 | G |
| 6 | BICF2P396597   | 30590175 | C | 0.5 | 0.2857 | A |
| 6 | BICF2P387883   | 30604319 | A | 0.5 | 0.2857 | G |
| 6 | BICF2P1245661  | 30621327 | C | 0.5 | 0.2857 | A |
| 6 | BICF2S22949377 | 30641636 | G | 0   | 0.2857 | C |
| 6 | BICF2P816740   | 30669336 | A | 0.5 | 0.7143 | G |
| 6 | BICF2P30466    | 30675469 | A | 0.5 | 0.7143 | C |
| 6 | BICF2S23244470 | 30690911 | A | 0   | 0      | G |
| 6 | BICF2P836619   | 30694717 | G | 0.5 | 0.5714 | A |
| 6 | BICF2P282715   | 30705314 | 0 | 0   | 0      | A |
| 6 | BICF2P1397874  | 30722469 | C | 0.5 | 0.5714 | G |
| 6 | BICF2P917923   | 30741076 | G | 0.5 | 0.2857 | A |
| 6 | BICF2P917920   | 30741920 | G | 0.5 | 0.2857 | A |
| 6 | BICF2P1353848  | 30757081 | 0 | 0   | 0      | G |
| 6 | BICF2P874646   | 30771177 | A | 0.5 | 0.2857 | G |
| 6 | BICF2P874654   | 30774274 | A | 0.5 | 0.2857 | G |
| 6 | BICF2P1180339  | 30788504 | A | 0.5 | 0.2857 | G |
| 6 | BICF2P514244   | 30800164 | G | 0.5 | 0.2857 | A |
| 6 | BICF2P856881   | 30809290 | 0 | 0   | 0      | C |
| 6 | BICF2S23251131 | 30823103 | G | 0.5 | 0.2857 | A |
| 6 | BICF2P598167   | 30835881 | A | 0   | 0      | G |
| 6 | BICF2P198317   | 30848628 | 0 | 0   | 0      | A |
| 6 | BICF2S23716269 | 30855695 | G | 0.5 | 0.2857 | A |
| 6 | BICF2P1386120  | 30868801 | A | 0.5 | 0.2857 | G |
| 6 | BICF2P204270   | 30886921 | G | 0.5 | 0.4286 | A |
| 6 | BICF2P873440   | 30894927 | 0 | 0   | 0      | A |
| 6 | BICF2P873446   | 30896499 | A | 0   | 0      | G |
| 6 | BICF2P144559   | 30900665 | 0 | 0   | 0      | C |
| 6 | BICF2P1470629  | 30917487 | A | 0   | 0      | G |
| 6 | BICF2S23226656 | 30940261 | G | 0   | 0      | A |
| 6 | BICF2P668315   | 30949244 | 0 | 0   | 0      | C |
| 6 | BICF2S23014331 | 30960792 | A | 0   | 0      | G |
| 6 | BICF2P438456   | 30971665 | A | 0   | 0      | C |
| 6 | BICF2P137455   | 30984247 | A | 0.5 | 0.5714 | G |
| 6 | BICF2P1440930  | 30996512 | A | 0.5 | 0.4286 | G |
| 6 | BICF2P1440922  | 30998693 | C | 0.5 | 0.4167 | A |
| 6 | BICF2P90975    | 31010975 | 0 | 0   | 0      | T |
| 6 | BICF2P886957   | 31023348 | 0 | 0   | 0      | C |
| 6 | BICF2S23019547 | 31031645 | A | 1   | 1      | G |
| 6 | BICF2P1106134  | 31049028 | G | 1   | 1      | A |
| 6 | BICF2P521657   | 31058982 | G | 1   | 1      | A |
| 6 | BICF2P172351   | 31067563 | A | 0   | 0      | G |

|   |                        |          |   |     |        |   |
|---|------------------------|----------|---|-----|--------|---|
| 6 | BICF2P445676           | 31073734 | C | 0   | 0.2143 | A |
| 6 | BICF2P406152           | 31087763 | A | 0   | 0      | G |
| 6 | BICF2P898398           | 31099237 | G | 0   | 0      | A |
| 6 | BICF2P1126147          | 31108747 | A | 1   | 1      | C |
| 6 | BICF2P369864           | 31120160 | A | 0   | 0.2143 | G |
| 6 | BICF2P589362           | 31130569 | A | 1   | 0.7857 | G |
| 6 | BICF2P1002330          | 31136571 | C | 0   | 0.2143 | A |
| 6 | BICF2S23239881         | 31144892 | A | 1   | 0.7857 | G |
| 6 | BICF2P169514           | 31158603 | G | 0   | 0      | A |
| 6 | BICF2P978858           | 31160725 | G | 0   | 0      | A |
| 6 | BICF2P203401           | 31175232 | A | 0   | 0      | G |
| 6 | BICF2P357604           | 31187243 | C | 0   | 0      | A |
| 6 | BICF2P304666           | 31188863 | G | 0   | 0.2857 | A |
| 6 | BICF2G630586560        | 31221139 | G | 0   | 0      | A |
| 6 | BICF2G630586555        | 31223490 | G | 1   | 0.7857 | A |
| 6 | BICF2G630586533        | 31234056 | A | 0   | 0      | G |
| 6 | BICF2G630586490        | 31266640 | C | 1   | 0.7857 | A |
| 6 | BICF2P68842            | 31274337 | G | 1   | 1      | A |
| 6 | BICF2G630586474        | 31282253 | G | 1   | 1      | A |
| 6 | BICF2G630586426        | 31303150 | C | 0   | 0      | A |
| 6 | BICF2G630586413        | 31323912 | 0 | 0   | 0      | C |
| 6 | BICF2P316380           | 31326899 | 0 | 0   | 0      | A |
| 6 | BICF2G630586410        | 31339166 | A | 0.5 | 0.2857 | G |
| 6 | BICF2P889173           | 31359258 | A | 0   | 0      | G |
| 6 | BICF2P1354575          | 31370678 | G | 0.5 | 0.4286 | A |
| 6 | BICF2G630586406        | 31373113 | G | 0.5 | 0.2143 | A |
| 6 | BICF2G630586373        | 31392244 | A | 0.5 | 0.7857 | G |
| 6 | BICF2G630586361        | 31403633 | C | 0   | 0      | A |
| 6 | BICF2G630586350        | 31415653 | G | 0   | 0      | A |
| 6 | BICF2G630586341        | 31421513 | A | 0   | 0      | G |
| 6 | BICF2P1283892          | 31439964 | C | 0.5 | 0.2143 | G |
| 6 | BICF2P1283893          | 31440015 | 0 | 0   | 0      | A |
| 6 | BICF2G630586305        | 31495544 | A | 0   | 0      | G |
| 6 | BICF2S22941570         | 31508401 | T | 0.5 | 0.5714 | A |
| 6 | BICF2G630586304        | 31516448 | A | 0   | 0.2143 | G |
| 6 | BICF2S23140292         | 31527771 | G | 0   | 0      | A |
| 6 | BICF2S23229089         | 31553428 | 0 | 0   | 0      | G |
| 6 | TIGRP2P80872_rs8782871 | 31600468 | 0 | 0   | 0      | G |
| 6 | BICF2G630586300        | 31603604 | A | 0.5 | 0.4286 | G |
| 6 | BICF2P1320833          | 31636517 | 0 | 0   | 0      | C |
| 6 | BICF2S23023929         | 31684025 | G | 0   | 0      | A |
| 6 | BICF2P934520           | 31698321 | G | 0   | 0      | C |
| 6 | BICF2P933043           | 31731949 | 0 | 0   | 0      | A |
| 6 | BICF2P686007           | 31746530 | 0 | 0   | 0      | A |
| 6 | TIGRP2P80880_rs8685059 | 31761429 | 0 | 0   | 0      | C |
| 6 | BICF2P1053587          | 31768381 | A | 0   | 0      | G |
| 6 | BICF2S23032355         | 31776253 | C | 0.5 | 0.5    | A |

|   |                        |          |   |     |        |   |
|---|------------------------|----------|---|-----|--------|---|
| 6 | BICF2S23122920         | 31791794 | G | 0   | 0      | A |
| 6 | BICF2P365482           | 31812759 | 0 | 0   | 0      | G |
| 6 | BICF2P442357           | 31820768 | 0 | 0   | 0      | G |
| 6 | BICF2P515022           | 31823557 | C | 0   | 0.1667 | A |
| 6 | BICF2P379136           | 31832571 | A | 0   | 0      | G |
| 6 | BICF2P403395           | 31844584 | 0 | 0   | 0      | G |
| 6 | BICF2P167158           | 31859099 | A | 0   | 0.2143 | C |
| 6 | BICF2P364263           | 31868891 | C | 0.5 | 0.5    | A |
| 6 | BICF2P1416367          | 31885889 | G | 0   | 0.2143 | A |
| 6 | BICF2P334562           | 31894565 | C | 0.5 | 0.5    | A |
| 6 | BICF2S22958858         | 31914941 | A | 0.5 | 0.2857 | G |
| 6 | BICF2P235383           | 31926097 | A | 0.5 | 0.5    | G |
| 6 | BICF2S23611000         | 31943854 | A | 0.5 | 0.5    | G |
| 6 | BICF2P580104           | 31964007 | A | 0.5 | 0.25   | C |
| 6 | BICF2P676216           | 31970161 | 0 | 0   | 0      | G |
| 6 | TIGRP2P80892_rs9239190 | 31986531 | 0 | 0   | 0      | G |
| 6 | BICF2S23124815         | 32001000 | G | 0   | 0      | A |
| 6 | BICF2S23124548         | 32004983 | A | 0   | 0      | G |
| 6 | BICF2P574946           | 32026980 | 0 | 0   | 0      | A |
| 6 | BICF2S23416665         | 32049690 | 0 | 0   | 0      | A |
| 6 | BICF2P694019           | 32064532 | 0 | 0   | 0      | A |
| 6 | BICF2S2346673          | 32077176 | 0 | 0   | 0      | G |
| 6 | BICF2S23526203         | 32113806 | A | 0.5 | 0.5    | C |
| 6 | BICF2P1033914          | 32119954 | G | 0.5 | 0.2    | A |
| 6 | BICF2P712476           | 32153514 | 0 | 0   | 0      | G |
| 6 | G393f33S95             | 32178464 | G | 0   | 0      | A |
| 6 | G394f40S328            | 32223324 | G | 0   | 0      | A |
| 6 | BICF2P107844           | 32247074 | 0 | 0   | 0      | A |
| 6 | BICF2G630586289        | 32262704 | A | 0.5 | 0.2857 | G |
| 6 | BICF2G630586273        | 32276966 | A | 0.5 | 0.2857 | G |
| 6 | BICF2G630586252        | 32290577 | A | 0.5 | 0.2857 | G |
| 6 | BICF2G630586251        | 32294221 | G | 0.5 | 0.2857 | A |
| 6 | BICF2P1049781          | 32304865 | 0 | 0   | 0      | C |
| 6 | BICF2G630586247        | 32320193 | C | 0.5 | 0.2857 | A |
| 6 | BICF2G630586243        | 32330786 | A | 0.5 | 0.2857 | G |
| 6 | BICF2G630586237        | 32335990 | G | 0.5 | 0.2857 | A |
| 6 | BICF2G630586232        | 32339725 | A | 0.5 | 0.2857 | C |
| 6 | BICF2G630586221        | 32349517 | G | 0   | 0      | A |
| 6 | BICF2G630586204        | 32362008 | A | 0   | 0      | G |
| 6 | BICF2G630586195        | 32388206 | A | 0.5 | 0.2857 | G |
| 6 | BICF2G630586186        | 32395733 | A | 0.5 | 0.2857 | G |
| 6 | BICF2G630586174        | 32410899 | C | 0.5 | 0.2857 | G |
| 6 | BICF2P766934           | 32427818 | 0 | 0   | 0      | G |
| 6 | BICF2G630586173        | 32433646 | A | 0   | 0      | C |
| 6 | BICF2G630586172        | 32459136 | T | 0   | 0      | A |
| 6 | TIGRP2P80903_rs9220084 | 32470293 | 0 | 0   | 0      | A |
| 6 | BICF2P1048494          | 32482787 | 0 | 0   | 0      | G |

|   |                        |          |   |     |        |   |
|---|------------------------|----------|---|-----|--------|---|
| 6 | BICF2P1274393          | 32510434 | 0 | 0   | 0      | A |
| 6 | BICF2P554711           | 32531179 | 0 | 0   | 0      | A |
| 6 | BICF2S23238114         | 32550032 | G | 0   | 0      | A |
| 6 | BICF2S23913859         | 32560872 | G | 0   | 0      | A |
| 6 | BICF2P1082465          | 32578247 | 0 | 0   | 0      | C |
| 6 | BICF2G630586164        | 32611556 | A | 0.5 | 0.25   | G |
| 6 | BICF2S23751231         | 32614977 | 0 | 0   | 0      | G |
| 6 | BICF2P940079           | 32636052 | 0 | 0   | 0      | G |
| 6 | BICF2S23764469         | 32677686 | G | 0   | 0      | A |
| 6 | BICF2G630586159        | 32691102 | G | 0.5 | 0.2857 | A |
| 6 | BICF2S23318850         | 32701813 | G | 0   | 0      | A |
| 6 | BICF2P395369           | 32717258 | A | 0   | 0      | G |
| 6 | BICF2P393159           | 32726110 | 0 | 0   | 0      | C |
| 6 | BICF2G630586157        | 32737268 | A | 0   | 0      | G |
| 6 | BICF2G630586155        | 32751599 | A | 0   | 0      | C |
| 6 | BICF2G630586152        | 32760070 | A | 0   | 0      | G |
| 6 | BICF2G630586148        | 32764439 | G | 0   | 0      | A |
| 6 | BICF2G630586141        | 32776531 | A | 1   | 1      | G |
| 6 | BICF2G630586120        | 32792009 | A | 0   | 0      | T |
| 6 | BICF2G630586118        | 32792862 | A | 0   | 0      | C |
| 6 | BICF2G630586094        | 32804049 | A | 0.5 | 0.75   | G |
| 6 | BICF2G630586089        | 32816745 | A | 0.5 | 0.7143 | G |
| 6 | BICF2G630586076        | 32823773 | A | 0   | 0.25   | G |
| 6 | BICF2G630586060        | 32832568 | A | 0   | 0.2    | C |
| 6 | BICF2G630586047        | 32845553 | A | 0   | 0.2857 | G |
| 6 | TIGRP2P80934_rs8562242 | 32858477 | A | 0.5 | 0.2143 | G |
| 6 | BICF2G630586041        | 32858538 | A | 0.5 | 0.5714 | G |
| 6 | BICF2G630586035        | 32870834 | A | 0   | 0.2143 | C |
| 6 | BICF2G630586021        | 32888928 | A | 0   | 0.2143 | G |
| 6 | BICF2G630586020        | 32892236 | G | 0   | 0.2143 | A |
| 6 | BICF2P1463132          | 32908844 | A | 0   | 0.2857 | G |
| 6 | BICF2S23519332         | 32922375 | 0 | 0   | 0      | G |
| 6 | BICF2G630585990        | 32934066 | A | 0   | 0      | G |
| 6 | BICF2G630585988        | 32944553 | A | 0   | 0      | G |
| 6 | BICF2G630585983        | 32950706 | G | 1   | 0.5    | A |
| 6 | BICF2S22920613         | 32960859 | A | 0.5 | 0.2857 | G |
| 6 | BICF2G630585970        | 32979178 | A | 0.5 | 0.2143 | G |
| 6 | BICF2G630585948        | 32995803 | A | 1   | 0.5    | G |
| 6 | BICF2G630585939        | 33012983 | G | 1   | 0.5    | A |
| 6 | BICF2P266971           | 33022613 | G | 0   | 0      | A |
| 6 | BICF2P876678           | 33029507 | 0 | 0   | 0      | G |
| 6 | BICF2P159698           | 33045349 | 0 | 0   | 0      | C |
| 6 | BICF2S23740638         | 33056727 | A | 0   | 0      | G |
| 6 | BICF2P779237           | 33066944 | 0 | 0   | 0      | A |
| 6 | BICF2G630585924        | 33080427 | G | 0   | 0      | A |
| 6 | BICF2S23611539         | 33086696 | G | 0   | 0      | A |
| 6 | BICF2S2361347          | 33102379 | A | 0   | 0      | G |

|   |                        |          |   |     |        |   |
|---|------------------------|----------|---|-----|--------|---|
| 6 | BICF2S2441636          | 33109656 | A | 0   | 0      | G |
| 6 | BICF2G630585909        | 33128416 | A | 1   | 0.5    | G |
| 6 | BICF2G630585884        | 33136151 | A | 0   | 0      | G |
| 6 | BICF2S2317602          | 33144178 | A | 0   | 0.2143 | G |
| 6 | BICF2G630585862        | 33161209 | A | 1   | 0.5    | G |
| 6 | BICF2G630585860        | 33168480 | A | 1   | 0.5    | C |
| 6 | BICF2G630585845        | 33184829 | G | 0   | 0      | A |
| 6 | BICF2S23335292         | 33189108 | A | 0   | 0      | G |
| 6 | BICF2G630585822        | 33204966 | A | 0   | 0      | G |
| 6 | BICF2G630585816        | 33212835 | A | 1   | 0.5    | G |
| 6 | BICF2P842066           | 33224059 | A | 1   | 0.5    | G |
| 6 | BICF2S23327080         | 33232181 | A | 0   | 0.2143 | G |
| 6 | BICF2G630585790        | 33237422 | A | 0   | 0      | C |
| 6 | BICF2S22919529         | 33257269 | A | 0   | 0.5    | G |
| 6 | BICF2G630585768        | 33260944 | G | 0   | 0      | A |
| 6 | BICF2G630585754        | 33277659 | A | 0   | 0      | G |
| 6 | TIGRP2P80963_rs8969411 | 33291381 | A | 0   | 0.2857 | G |
| 6 | TIGRP2P80964_rs8775794 | 33293874 | A | 0   | 0.2857 | G |
| 6 | BICF2G630585683        | 33305291 | A | 0   | 0      | G |
| 6 | BICF2P1114240          | 33317329 | A | 0   | 0.2143 | G |
| 6 | TIGRP2P80972_rs8979745 | 33320114 | G | 0.5 | 0.4286 | A |
| 6 | BICF2P633167           | 33320273 | A | 0.5 | 0.4286 | G |
| 6 | TIGRP2P80989_rs8632560 | 33336139 | G | NA  | 0.6667 | A |
| 6 | BICF2P500653           | 33339952 | G | 0.5 | 0.2857 | A |
| 6 | BICF2S2336013          | 33342213 | A | 0.5 | 0.4286 | G |
| 6 | BICF2P510086           | 33350226 | C | 0.5 | 0.2857 | G |
| 6 | BICF2P266206           | 33361996 | G | 0.5 | 0.2857 | A |
| 6 | TIGRP2P81019_rs8968368 | 33377323 | G | 0   | 0.5    | A |
| 6 | BICF2G630585615        | 33388716 | A | 0.5 | 0.4286 | G |
| 6 | BICF2G630585581        | 33396458 | C | 0.5 | 0.2857 | G |
| 6 | BICF2G630585553        | 33407763 | C | 0.5 | 0.5    | A |
| 6 | BICF2G630585521        | 33423400 | C | 0   | 0.2143 | A |
| 6 | BICF2G630585516        | 33427083 | A | 0.5 | 0.5    | C |
| 6 | TIGRP2P81041_rs9013616 | 33432114 | A | 0.5 | 0.5    | C |
| 6 | BICF2P140675           | 33443279 | A | 0.5 | 0.5    | G |
| 6 | BICF2S23113728         | 33455565 | A | 0.5 | 0.4    | G |
| 6 | BICF2S23512763         | 33468177 | G | 0.5 | 0.5    | A |
| 6 | BICF2G630585504        | 33481415 | A | 0.5 | 0.2143 | G |
| 6 | BICF2S22943050         | 33489890 | C | 0.5 | 0.2857 | A |
| 6 | BICF2G630585497        | 33500464 | A | 0   | 0.2857 | G |
| 6 | BICF2G630585464        | 33521214 | G | 0.5 | 0.5714 | A |
| 6 | BICF2P932616           | 33525066 | G | 0.5 | 0.2857 | A |
| 6 | BICF2G630585419        | 33548297 | A | 0   | 0.2857 | G |
| 6 | BICF2G630585403        | 33566573 | A | 0   | 0      | G |
| 6 | BICF2G630585392        | 33570931 | A | 0   | 0      | C |
| 6 | BICF2G630585368        | 33582449 | G | 0   | 0      | A |
| 6 | BICF2S2327131          | 33591521 | A | 0   | 0      | G |

|   |                        |          |   |     |        |   |
|---|------------------------|----------|---|-----|--------|---|
| 6 | BICF2G630585306        | 33613786 | G | 0   | 0      | A |
| 6 | BICF2P1383420          | 33620695 | G | 0   | 0      | A |
| 6 | BICF2G630585288        | 33621483 | A | 0   | 0      | T |
| 6 | BICF2G630585283        | 33625491 | G | 0   | 0      | A |
| 6 | TIGRP2P81106_rs8624553 | 33627945 | A | 0   | 0      | G |
| 6 | BICF2G630585276        | 33646931 | A | 0   | 0      | C |
| 6 | BICF2G630585269        | 33668574 | G | 0   | 0      | A |
| 6 | BICF2G630585267        | 33677577 | C | 0   | 0      | A |
| 6 | BICF2P1071770          | 33686123 | A | 0   | 0.2143 | G |
| 6 | BICF2G630585260        | 33713224 | G | 0.5 | 0.2857 | A |
| 6 | BICF2G630585251        | 33728186 | G | 0   | 0      | A |
| 6 | BICF2S2432793          | 33731272 | A | 0   | 0      | G |
| 6 | BICF2G630585247        | 33731293 | A | 0   | 0      | G |
| 6 | BICF2G630585246        | 33731696 | A | 0   | 0      | G |
| 6 | BICF2G630585244        | 33733629 | A | 0.5 | 0.5    | C |
| 6 | BICF2S2293427          | 33742519 | A | 0.5 | 0.5    | G |
| 6 | BICF2P289952           | 33753776 | A | 0.5 | 0.5    | C |
| 6 | BICF2P289953           | 33753798 | A | 0.5 | 0.5    | G |
| 6 | BICF2G630585189        | 33768975 | A | 0.5 | 0.5    | G |
| 6 | BICF2G630585177        | 33778623 | A | 0.5 | 0.5    | G |
| 6 | BICF2G630585155        | 33794401 | G | 0   | 0.2143 | A |
| 6 | BICF2G630585148        | 33799904 | G | 0   | 0.2143 | A |
| 6 | BICF2S2341729          | 33812952 | C | 0   | 0.2143 | A |
| 6 | BICF2P872134           | 33821965 | A | 0   | 0.2143 | G |
| 6 | BICF2G630585128        | 33835903 | C | 0   | 0.2143 | A |
| 6 | BICF2G630585105        | 33860261 | G | 0   | 0.2143 | A |
| 6 | BICF2G630585101        | 33863487 | C | 0   | 0.2143 | A |
| 6 | BICF2G630585090        | 33871128 | A | 0   | 0.2143 | G |
| 6 | BICF2G630585084        | 33885598 | A | 1   | 0.7857 | G |
| 6 | BICF2G630585076        | 33891088 | A | 0   | 0      | G |
| 6 | BICF2G630585064        | 33903379 | G | 0   | 0      | A |
| 6 | TIGRP2P81125_rs8413452 | 33915762 | C | 0   | 0.2143 | A |
| 6 | BICF2P195062           | 33936166 | A | 0.5 | 0.7857 | C |
| 6 | BICF2G630584996        | 33941504 | A | 0.5 | 0.5714 | G |
| 6 | BICF2G630584989        | 33952280 | A | 0   | 0      | G |
| 6 | BICF2G630584984        | 33961302 | A | 0.5 | 0.5714 | G |
| 6 | BICF2G630584967        | 33977225 | A | 0.5 | 0.2143 | G |
| 6 | BICF2G630584961        | 33983750 | A | 0.5 | 0.1667 | G |
| 6 | BICF2G630584946        | 33994334 | A | 0.5 | 0.2143 | G |
| 6 | BICF2G630584929        | 34012214 | G | 0.5 | 0.2143 | A |
| 6 | BICF2G630584915        | 34026012 | G | 0.5 | 0.7857 | A |
| 6 | BICF2G630584910        | 34031035 | A | 0   | 0      | C |
| 6 | BICF2G630584879        | 34052522 | A | 0.5 | 0.2143 | G |
| 6 | BICF2G630584875        | 34067028 | G | 0.5 | 0.2143 | A |
| 6 | TIGRP2P81145_rs9092512 | 34078085 | A | 0.5 | 0.5714 | T |
| 6 | TIGRP2P81148_rs9079944 | 34088697 | A | 0.5 | 0.5714 | G |
| 6 | TIGRP2P81156_rs9086008 | 34104789 | G | 0.5 | 0.5714 | A |



|   |                        |          |   |     |        |   |
|---|------------------------|----------|---|-----|--------|---|
| 6 | BICF2G630584866        | 34119279 | G | 0.5 | 0.5    | A |
| 6 | BICF2G630584860        | 34127555 | G | 0.5 | 0.5    | A |
| 6 | BICF2G630584850        | 34138475 | G | 0.5 | 0.5    | A |
| 6 | BICF2G630584847        | 34145646 | G | 0.5 | 0.5    | A |
| 6 | BICF2G630584843        | 34150002 | A | 0.5 | 0.2143 | G |
| 6 | BICF2G630584824        | 34164204 | G | 0.5 | 0.5    | A |
| 6 | BICF2S23319359         | 34171127 | G | 0.5 | 0.5    | A |
| 6 | BICF2P960979           | 34179155 | A | 0.5 | 0.5    | G |
| 6 | BICF2P665165           | 34196845 | G | 0.5 | 0.2143 | A |
| 6 | BICF2G630584798        | 34198956 | A | 0   | 0      | G |
| 6 | BICF2P1219939          | 34203582 | A | 0.5 | 0.2143 | C |
| 6 | TIGRP2P81177_rs8680801 | 34222467 | G | 0.5 | 0.2143 | A |
| 6 | BICF2P62557            | 34227981 | A | 0.5 | 0.2143 | G |
| 6 | BICF2P1041381          | 34242682 | A | 0   | 0.2857 | G |
| 6 | BICF2S23513093         | 34251825 | A | 0   | 0      | G |
| 6 | BICF2G630584731        | 34255085 | A | 0   | 0      | G |
| 6 | BICF2G630584703        | 34260936 | G | 1   | 0.7143 | A |
| 6 | BICF2G630584685        | 34275407 | C | 1   | 1      | A |
| 6 | BICF2G630584662        | 34282987 | A | 0   | 0      | G |
| 6 | BICF2G630584639        | 34297408 | A | 0   | 0      | G |
| 6 | BICF2G630584604        | 34315357 | A | 0   | 0      | G |
| 6 | BICF2P793970           | 34326625 | A | 0   | 0      | G |
| 6 | BICF2G630584586        | 34327941 | A | 0   | 0      | G |
| 6 | BICF2P993907           | 34348364 | G | 0   | 0      | A |
| 6 | BICF2P312113           | 34361015 | A | 0   | 0      | G |
| 6 | BICF2G630584534        | 34361331 | G | 0   | 0      | A |
| 6 | BICF2G630584524        | 34368266 | A | 0   | 0      | G |
| 6 | BICF2G630584509        | 34382260 | A | 0   | 0.2857 | G |
| 6 | BICF2P1257291          | 34395175 | G | 0   | 0.2857 | A |
| 6 | BICF2G630584488        | 34398652 | A | 0   | 0      | G |
| 6 | BICF2P1144792          | 34409440 | A | 0   | 0.2857 | G |
| 6 | BICF2P923393           | 34425853 | A | 0.5 | 0.5    | G |
| 6 | BICF2G630584465        | 34432216 | C | 0.5 | 0.1667 | A |
| 6 | BICF2G630584454        | 34445435 | A | 0.5 | 0.2143 | G |
| 6 | BICF2P915525           | 34460412 | C | 0   | 0      | A |
| 6 | BICF2G630584419        | 34462130 | C | 0   | 0      | G |
| 6 | BICF2G630584417        | 34462770 | A | 0   | 0      | C |
| 6 | BICF2G630584408        | 34473683 | A | 0   | 0      | G |
| 6 | BICF2G630584401        | 34477090 | A | 0   | 0      | C |
| 6 | BICF2S24415381         | 34491126 | 0 | 0   | 0      | C |
| 6 | BICF2G630584358        | 34510554 | A | 0   | 0      | G |
| 6 | TIGRP2P81256_rs9074948 | 34517257 | G | 0.5 | 0.7857 | A |
| 6 | TIGRP2P81260_rs9032553 | 34527943 | 0 | 0   | 0      | G |
| 6 | BICF2P126834           | 34535955 | A | 0   | 0.2857 | G |
| 6 | BICF2P573476           | 34551591 | A | 0   | 0      | G |
| 6 | BICF2P412160           | 34558904 | 0 | 0   | 0      | G |
| 6 | BICF2G630584326        | 34569339 | A | 0   | 0      | G |

|   |                 |          |   |     |        |   |
|---|-----------------|----------|---|-----|--------|---|
| 6 | BICF2P879558    | 34581239 | 0 | 0   | 0      | G |
| 6 | BICF2G630584311 | 34595469 | A | 0   | 0      | G |
| 6 | BICF2G630584282 | 34616995 | A | 1   | 1      | G |
| 6 | BICF2G630584265 | 34635530 | C | 0   | 0      | A |
| 6 | BICF2G630584254 | 34643811 | C | 0   | 0      | A |
| 6 | BICF2G630584243 | 34650065 | G | 0   | 0      | A |
| 6 | BICF2P415461    | 34670914 | A | 0.5 | 0.2143 | G |
| 6 | BICF2G630584206 | 34673016 | A | 0   | 0      | G |
| 6 | BICF2P1289134   | 34690173 | A | 0   | 0      | G |
| 6 | BICF2G630584177 | 34700841 | A | 0.5 | 0.7857 | G |
| 6 | BICF2G630584171 | 34705790 | A | 0.5 | 0.7857 | G |
| 6 | BICF2G630584167 | 34708232 | A | 0   | 0      | G |
| 6 | BICF2G630584155 | 34719660 | A | 0.5 | 0.7857 | G |
| 6 | BICF2G630584154 | 34723098 | T | 0.5 | 0.2143 | A |
| 6 | BICF2G630584147 | 34731480 | G | 0.5 | 0.2143 | A |
| 6 | BICF2P882062    | 34747657 | A | 0   | 0      | G |
| 6 | BICF2G630584115 | 34754925 | G | 0   | 0      | C |
| 6 | BICF2G630584097 | 34760041 | A | 0   | 0      | C |
| 6 | BICF2G630584081 | 34772603 | T | 0   | 0      | A |
| 6 | BICF2G630584076 | 34782166 | A | 0   | 0      | T |
| 6 | BICF2P665652    | 34790892 | A | 0   | 0      | G |
| 6 | BICF2P567160    | 34794377 | G | 0.5 | 0.2143 | A |
| 6 | BICF2G630584039 | 34809359 | A | 0.5 | 0.7857 | G |
| 6 | BICF2G630584034 | 34812095 | A | 0   | 0      | G |
| 6 | BICF2G630584010 | 34824165 | A | 0   | 0      | G |
| 6 | BICF2G630583996 | 34828903 | A | 0   | 0      | G |
| 6 | BICF2G630583987 | 34839464 | A | 0   | 0      | G |
| 6 | BICF2P388604    | 34846842 | A | 0   | 0      | G |
| 6 | BICF2P91415     | 34859257 | A | 0.5 | 0.2143 | G |
| 6 | BICF2G630583975 | 34874368 | G | 0.5 | 0.7857 | A |
| 6 | BICF2G630583949 | 34881365 | G | 0.5 | 0.5    | A |
| 6 | BICF2S23330281  | 34894830 | A | 0.5 | 0.5    | G |
| 6 | BICF2G630583937 | 34897774 | G | 0.5 | 0.5    | A |
| 6 | BICF2G630583924 | 34911762 | A | 0   | 0      | G |
| 6 | BICF2G630583909 | 34917587 | A | 0   | 0      | G |
| 6 | BICF2S23252462  | 34935950 | G | 0.5 | 0.5714 | A |
| 6 | BICF2P305135    | 34939563 | A | 0   | 0      | C |
| 6 | BICF2P266900    | 34956002 | C | 0.5 | 0.2143 | A |
| 6 | BICF2P469674    | 34963301 | A | 0.5 | 0.2857 | G |
| 6 | BICF2G630583872 | 34977604 | G | 0.5 | 0.2857 | A |
| 6 | BICF2G630583856 | 34990481 | A | 0.5 | 0.4286 | C |
| 6 | BICF2G630583839 | 34997726 | T | 0   | 0.2143 | A |
| 6 | BICF2P1325833   | 35008979 | A | 0.5 | 0.2143 | C |
| 6 | BICF2G630583799 | 35014520 | G | 1   | 0.7857 | A |
| 6 | BICF2S22928590  | 35028456 | G | 0.5 | 0.7143 | C |
| 6 | BICF2P528826    | 35041042 | G | 0.5 | 0.5714 | A |
| 6 | BICF2S2337208   | 35062793 | C | 1   | 0.7857 | A |

|   |                        |          |   |     |        |   |
|---|------------------------|----------|---|-----|--------|---|
| 6 | BICF2G630583777        | 35072272 | A | 0.5 | 0.2143 | G |
| 6 | BICF2P591573           | 35079251 | A | 0   | 0      | G |
| 6 | BICF2G630583767        | 35097961 | 0 | 0   | 0      | G |
| 6 | BICF2P1236425          | 35109329 | A | 0   | 0      | G |
| 6 | TIGRP2P81378_rs8760318 | 35129440 | G | 0.5 | 0.2143 | A |
| 6 | BICF2P1227098          | 35136590 | A | 0.5 | 0.2143 | G |
| 6 | BICF2S2339809          | 35147968 | A | 0   | 0.2857 | C |
| 6 | BICF2P1164130          | 35160437 | G | 0.5 | 0.2143 | A |
| 6 | TIGRP2P81392_rs8946488 | 35172216 | G | 0.5 | 0.2143 | C |
| 6 | BICF2S2395270          | 35179023 | T | 0   | 0      | A |
| 6 | G395f28S166            | 35192365 | C | 0.5 | 0.2143 | A |
| 6 | BICF2P1070091          | 35218310 | A | 0   | 0.2857 | G |
| 6 | BICF2G630583761        | 35245202 | 0 | 0   | 0      | C |
| 6 | BICF2P984531           | 35261294 | A | 0   | 0      | G |
| 6 | BICF2P792980           | 35277569 | A | 0.5 | 0.2143 | G |
| 6 | BICF2P166168           | 35288882 | A | 0   | 0      | G |
| 6 | BICF2G630583744        | 35310200 | A | 0.5 | 0.2143 | G |
| 6 | BICF2G630583738        | 35321312 | 0 | 0   | 0      | G |
| 6 | BICF2G630583731        | 35331385 | G | 0.5 | 0.2143 | A |
| 6 | BICF2G630583726        | 35350092 | C | 0   | 0.2857 | G |
| 6 | BICF2G630583723        | 35363287 | A | 0   | 0.2857 | G |
| 6 | BICF2G630583720        | 35377335 | C | 0   | 0.2857 | G |
| 6 | BICF2S23155698         | 35394361 | A | 0   | 0.2857 | G |
| 6 | BICF2G630583716        | 35422125 | A | 0   | 0.2857 | G |
| 6 | BICF2G630583698        | 35449934 | A | 0.5 | 0.7857 | G |
| 6 | BICF2G630583685        | 35459495 | A | 0.5 | 0.7857 | G |
| 6 | BICF2G630583674        | 35467492 | G | 0.5 | 0.7857 | A |
| 6 | BICF2G630583670        | 35480448 | A | 0.5 | 0.7857 | G |
| 6 | BICF2G630583669        | 35491820 | C | 0   | 0      | G |
| 6 | BICF2P1012737          | 35504451 | 0 | 0   | 0      | A |
| 6 | BICF2G630583666        | 35531234 | 0 | 0   | 0      | G |
| 6 | BICF2G630583660        | 35539753 | G | 0.5 | 0.5    | A |
| 6 | BICF2G630583645        | 35551424 | A | 0   | 0      | G |
| 6 | BICF2G630583639        | 35557330 | A | 0.5 | 0.2143 | G |
| 6 | BICF2G630583638        | 35557812 | G | 0.5 | 0.2143 | A |
| 6 | BICF2G630583636        | 35559772 | A | 0.5 | 0.2143 | G |
| 6 | BICF2G630583614        | 35572104 | C | 0.5 | 0.5    | A |
| 6 | BICF2G630583587        | 35581592 | G | 0   | 0      | A |
| 6 | TIGRP2P81425_rs9204625 | 35596059 | A | 0.5 | 0.5    | G |
| 6 | BICF2G630583536        | 35610093 | C | 0   | 0.2857 | G |
| 6 | BICF2G630583531        | 35616569 | G | 0   | 0      | A |
| 6 | BICF2G630583524        | 35625293 | A | 0   | 0      | G |
| 6 | BICF2G630583521        | 35628191 | A | 0   | 0      | G |
| 6 | BICF2G630583509        | 35641555 | A | 0   | 0      | G |
| 6 | BICF2G630583507        | 35650404 | G | 0.5 | 0.5    | A |
| 6 | BICF2G630583498        | 35672733 | G | 0   | 0      | A |
| 6 | BICF2G630583492        | 35679347 | A | 0.5 | 0.7857 | G |

|   |                        |          |   |     |        |   |
|---|------------------------|----------|---|-----|--------|---|
| 6 | BICF2G630583485        | 35686319 | A | 0.5 | 0.7857 | G |
| 6 | BICF2P1388321          | 35699879 | 0 | 0   | 0      | A |
| 6 | BICF2P704998           | 35713069 | 0 | 0   | 0      | A |
| 6 | BICF2S23159009         | 35723291 | A | 0.5 | 0.5    | G |
| 6 | BICF2G630583469        | 35741588 | C | 0.5 | 0.7857 | A |
| 6 | BICF2G630583465        | 35742260 | G | 0.5 | 0.7857 | A |
| 6 | BICF2G630583450        | 35749162 | A | 0   | 0      | G |
| 6 | BICF2G630583431        | 35756354 | A | 0.5 | 0.5    | G |
| 6 | BICF2G630583408        | 35774621 | A | 0   | 0.2143 | C |
| 6 | BICF2S23325507         | 35792470 | A | 0   | 0.2857 | G |
| 6 | BICF2S22962399         | 35805096 | A | 0   | 0.2857 | C |
| 6 | BICF2S23719622         | 35833989 | A | 0   | 0.1667 | C |
| 6 | BICF2S23547531         | 35835271 | A | 0.5 | 0.5833 | C |
| 6 | BICF2S2352468          | 35854249 | G | 0.5 | 0.1667 | A |
| 6 | TIGRP2P81445_rs8715661 | 35860314 | C | 0   | 0      | A |
| 6 | G396f39S331            | 35875031 | G | 0   | 0      | A |
| 6 | BICF2P140480           | 35897311 | A | 0   | 0.2143 | G |
| 6 | BICF2S23725873         | 35910533 | G | 0.5 | 0.2143 | A |
| 6 | BICF2P831172           | 35917836 | G | 0   | 0      | A |
| 6 | BICF2S23715398         | 35926191 | G | 0.5 | 0.2143 | A |
| 6 | BICF2P1399036          | 35941835 | A | 0   | 0      | G |
| 6 | BICF2P1405840          | 35971183 | A | 0   | 0.2143 | C |
| 6 | BICF2P720129           | 35979542 | 0 | 0   | 0      | A |
| 6 | BICF2P39527            | 35988605 | 0 | 0   | 0      | G |
| 6 | TIGRP2P81457_rs8691370 | 35999162 | G | 0.5 | 0.5    | A |
| 6 | BICF2P436603           | 36008867 | A | 0   | 0.2143 | G |
| 6 | TIGRP2P81459_rs8888004 | 36028163 | C | 0   | 0      | A |
| 6 | BICF2P814810           | 36028303 | G | 0.5 | 0.2143 | A |
| 6 | BICF2S23049310         | 36040852 | G | 1   | 0.5    | A |
| 6 | BICF2P1459416          | 36041946 | A | 0.5 | 0.2143 | G |
| 6 | BICF2P1122110          | 36053705 | C | 1   | 0.5    | A |
| 6 | BICF2P1413778          | 36083307 | A | 0   | 0      | G |
| 6 | BICF2P464343           | 36089768 | A | 1   | 0.5    | G |
| 6 | BICF2P464346           | 36090140 | A | 1   | 0.5    | C |
| 6 | BICF2S23031597         | 36099165 | A | 0   | 0      | G |
| 6 | BICF2S23257230         | 36111870 | A | 1   | 0.5    | G |
| 6 | BICF2P837034           | 36131825 | A | 0   | 0      | G |
| 6 | BICF2S23751196         | 36133708 | A | 0.5 | 0.2857 | G |
| 6 | BICF2P678015           | 36147283 | G | 1   | 0.5    | A |
| 6 | BICF2P504496           | 36158966 | G | 1   | 0.5    | A |
| 6 | BICF2P10251            | 36164299 | G | 1   | 0.5    | A |
| 6 | BICF2P851295           | 36174980 | G | 1   | 0.5    | A |
| 6 | TIGRP2P81491_rs8816063 | 36180006 | A | 0   | 0      | G |
| 6 | BICF2P708711           | 36190555 | T | 1   | 0.5    | A |
| 6 | BICF2P92824            | 36204004 | 0 | 0   | 0      | A |
| 6 | TIGRP2P81493_rs8881128 | 36216258 | 0 | 0   | 0      | C |
| 6 | BICF2S2411755          | 36241225 | G | 0   | 0      | A |

|   |                        |          |   |     |        |   |
|---|------------------------|----------|---|-----|--------|---|
| 6 | TIGRP2P81496_rs9252277 | 36252900 | 0 | 0   | 0      | G |
| 6 | BICF2S2311850          | 36261227 | G | 1   | 0.7857 | A |
| 6 | TIGRP2P81501_rs8538978 | 36301763 | A | 0   | 0.2143 | G |
| 6 | BICF2P421833           | 36310832 | G | 0   | 0.2143 | A |
| 6 | BICF2P1172651          | 36319056 | A | 0   | 0      | G |
| 6 | BICF2P1393262          | 36336135 | A | 0   | 0.2143 | G |
| 6 | BICF2P810072           | 36348436 | A | 0   | 0.2143 | C |
| 6 | BICF2S23760026         | 36378861 | 0 | 0   | 0      | G |
| 6 | BICF2P688184           | 36389377 | 0 | 0   | 0      | G |
| 6 | TIGRP2P81528_rs8818067 | 36401127 | C | NA  | 0.7143 | A |
| 6 | BICF2P146328           | 36420524 | A | 0.5 | 0.7143 | G |
| 6 | BICF2P969004           | 36437516 | A | 0.5 | 0.7143 | G |
| 6 | BICF2P838077           | 36450765 | C | 0.5 | 0.7143 | G |
| 6 | BICF2P721402           | 36462210 | G | 0.5 | 0.7143 | A |
| 6 | TIGRP2P81549_rs9206834 | 36474320 | G | 0.5 | 0.7143 | A |
| 6 | BICF2P1468727          | 36479098 | A | 0.5 | 0.7143 | G |
| 6 | BICF2P719051           | 36492792 | A | 0.5 | 0.7143 | G |
| 6 | BICF2P1329144          | 36501164 | A | 0.5 | 0.7143 | T |
| 6 | TIGRP2P81571_rs8755669 | 36509464 | A | 0.5 | 0.7143 | G |
| 6 | BICF2P969841           | 36517359 | A | 0.5 | 0.7143 | G |
| 6 | TIGRP2P81578_rs8510967 | 36527961 | A | 0.5 | 0.7143 | G |
| 6 | TIGRP2P81584_rs8610786 | 36537648 | G | 0.5 | 0.7143 | A |
| 6 | TIGRP2P81585_rs9000889 | 36555768 | A | 1   | 1      | G |
| 6 | BICF2P122841           | 36565320 | 0 | 0   | 0      | G |
| 6 | BICF2P1060614          | 36577595 | A | 0.5 | 0.7143 | G |
| 6 | BICF2P1060613          | 36577634 | A | 0.5 | 0.7143 | G |
| 6 | BICF2P1000501          | 36590590 | A | 1   | 1      | G |
| 6 | BICF2P1000500          | 36590724 | G | 1   | 1      | C |
| 6 | TIGRP2P81600_rs8854929 | 36598530 | C | 1   | 1      | A |
| 6 | BICF2P1456728          | 36605166 | G | 1   | 1      | A |
| 6 | BICF2S23121175         | 36618296 | A | 1   | 1      | G |
| 6 | BICF2P24253            | 36619565 | G | 1   | 1      | A |
| 6 | TIGRP2P81614_rs8946224 | 36628645 | A | 1   | 1      | C |
| 6 | BICF2P310965           | 36648557 | A | 0   | 0      | G |
| 6 | BICF2P589524           | 36653210 | A | 0   | 0      | G |
| 6 | TIGRP2P81640_rs8766358 | 36664755 | C | 0   | 0      | A |
| 6 | BICF2P1007669          | 36677836 | A | 0   | 0      | G |
| 6 | BICF2P696643           | 36685153 | G | 0.5 | 0.2857 | A |
| 6 | BICF2P789497           | 36703139 | A | 1   | 0.7857 | G |
| 6 | BICF2P995211           | 36708354 | G | 1   | 0.7857 | A |
| 6 | BICF2P455543           | 36730206 | A | 1   | 0.7857 | G |
| 6 | BICF2S23124648         | 36737473 | A | 0   | 0      | C |
| 6 | BICF2P928316           | 36751564 | A | 0.5 | 0.5    | C |
| 6 | BICF2P385985           | 36763836 | G | 0.5 | 0.5    | A |
| 6 | BICF2P977588           | 36770244 | G | 0.5 | 0.5    | A |
| 6 | BICF2P208560           | 36780134 | G | 0.5 | 0.7143 | A |
| 6 | BICF2P199122           | 36788668 | G | 0.5 | 0.7143 | A |

|   |                        |          |   |     |        |   |
|---|------------------------|----------|---|-----|--------|---|
| 6 | BICF2P147888           | 36802109 | A | 0.5 | 0.75   | T |
| 6 | BICF2P1182583          | 36813933 | A | 0   | 0.2143 | T |
| 6 | BICF2P70172            | 36824093 | A | 0   | 0.2143 | G |
| 6 | BICF2P477185           | 36834609 | A | 0   | 0.2143 | G |
| 6 | TIGRP2P81680_rs9173639 | 36852583 | A | 0   | 0.2143 | G |
| 6 | BICF2S23027798         | 36862836 | G | 0.5 | 0.5    | A |
| 6 | BICF2P92317            | 36871868 | C | 0.5 | 0.5    | A |
| 6 | BICF2P57076            | 36887169 | G | 1   | 1      | A |
| 6 | BICF2P1426882          | 36895067 | G | 1   | 1      | A |
| 6 | BICF2P931242           | 36908135 | A | 0   | 0      | G |
| 6 | BICF2P931243           | 36908594 | A | 0.5 | 0.5    | C |
| 6 | BICF2P87850            | 36925050 | G | 0   | 0      | C |
| 6 | BICF2S23440954         | 36930386 | G | 0.5 | 0.5    | A |
| 6 | BICF2P424706           | 36945055 | A | 0   | 0      | G |
| 6 | BICF2P1262688          | 36950136 | G | 0   | 0      | C |
| 6 | BICF2P1349649          | 36965059 | 0 | 0   | 0      | G |
| 6 | BICF2S2324971          | 36976209 | A | 0   | 0      | G |
| 6 | BICF2S2349548          | 36994844 | G | 0.5 | 0.2857 | A |
| 6 | BICF2S2302221          | 37004077 | G | 0.5 | 0.2857 | A |
| 6 | BICF2P1155481          | 37007296 | G | 0.5 | 0.2857 | A |
| 6 | TIGRP2P81722_rs8799482 | 37023514 | C | 0.5 | 0.7143 | A |
| 6 | TIGRP2P81730_rs8983268 | 37037955 | A | 0.5 | 0.7143 | G |
| 6 | BICF2P796550           | 37051400 | A | 0   | 0      | C |
| 6 | TIGRP2P81738_rs8537590 | 37054795 | G | 0.5 | 0.7143 | A |
| 6 | TIGRP2P81753_rs9127078 | 37072166 | A | 0   | 0      | G |
| 6 | BICF2S2295629          | 37087955 | G | 0.5 | 0.5    | A |
| 6 | BICF2P674733           | 37105612 | 0 | 0   | 0      | G |
| 6 | BICF2P676091           | 37117106 | A | 0.5 | 0.5    | G |
| 6 | BICF2S23624107         | 37125345 | A | 0   | 0      | G |
| 6 | TIGRP2P81770_rs8855362 | 37133625 | 0 | 0   | 0      | A |
| 6 | BICF2P537803           | 37148711 | G | 0   | 0      | A |
| 6 | BICF2P777456           | 37197288 | A | 0.5 | 0.5    | G |
| 6 | TIGRP2P81785_rs9210545 | 37212020 | 0 | 0   | 0      | C |
| 6 | BICF2P73908            | 37214246 | A | 0.5 | 0.5    | G |
| 6 | BICF2P1171961          | 37227553 | A | 0.5 | 0.5    | G |
| 6 | BICF2P1004554          | 37248399 | 0 | 0   | 0      | C |
| 6 | BICF2S23046408         | 37262295 | A | 0   | 0      | G |
| 6 | BICF2P884959           | 37288569 | A | 0   | 0      | G |
| 6 | BICF2P877294           | 37310225 | G | 0   | 0      | A |
| 6 | BICF2P1412416          | 37318175 | C | 0   | 0      | A |
| 6 | BICF2P1218715          | 37339703 | 0 | 0   | 0      | G |
| 6 | BICF2P708610           | 37344472 | 0 | 0   | 0      | C |
| 6 | TIGRP2P81813_rs9029862 | 37355902 | G | 0.5 | 0.5    | A |
| 6 | BICF2P1087066          | 37365563 | 0 | 0   | 0      | G |
| 6 | TIGRP2P81821_rs8936346 | 37379415 | A | 0   | 0      | C |
| 6 | TIGRP2P81822_rs8670150 | 37389371 | A | 1   | 1      | C |
| 6 | BICF2P1294734          | 37407903 | A | 0.5 | 0.5    | G |

|   |                        |          |   |     |        |   |
|---|------------------------|----------|---|-----|--------|---|
| 6 | BICF2S22940740         | 37418777 | C | 0.5 | 0.5    | A |
| 6 | BICF2S22951326         | 37424610 | A | 0   | 0.2143 | G |
| 6 | BICF2S23660302         | 37448483 | G | 0   | 0      | A |
| 6 | TIGRP2P70379_rs8591278 | 37485807 | 0 | 0   | 0      | A |
| 6 | TIGRP2P81831_rs8854452 | 37501824 | A | 0.5 | 0.2857 | T |
| 6 | BICF2P979277           | 37522062 | A | 0   | 0      | G |
| 6 | BICF2P994020           | 37530241 | G | 0   | 0      | A |
| 6 | BICF2P261941           | 37536212 | A | 0   | 0      | G |
| 6 | BICF2P389707           | 37555002 | G | 0   | 0      | A |
| 6 | BICF2P1382455          | 37559959 | C | 0   | 0      | A |
| 6 | BICF2P551086           | 37574132 | G | 0   | 0      | A |
| 6 | BICF2P69598            | 37585228 | A | 0   | 0      | G |
| 6 | BICF2P936784           | 37597362 | A | 0   | 0      | G |
| 6 | TIGRP2P81839_rs8733735 | 37623380 | 0 | 0   | 0      | G |
| 6 | BICF2S23011584         | 37633483 | A | 0   | 0      | G |
| 6 | BICF2P1269501          | 37640990 | A | 0   | 0      | C |
| 6 | BICF2P832746           | 37645048 | G | 0   | 0      | A |
| 6 | BICF2P908459           | 37661177 | G | 0.5 | 0.2857 | C |
| 6 | BICF2S23722619         | 37666633 | G | 0.5 | 0.5    | A |
| 6 | BICF2P677176           | 37675036 | G | 0.5 | 0.2857 | A |
| 6 | BICF2P896800           | 37677945 | C | 0   | 0      | A |
| 6 | BICF2P29440            | 37693653 | G | 0   | 0      | A |
| 6 | BICF2P788878           | 37700624 | G | 0.5 | 0.5    | A |
| 6 | TIGRP2P81848_rs8752056 | 37709748 | G | 0.5 | 0.5    | A |
| 6 | TIGRP2P81853_rs8771015 | 37726004 | 0 | 0   | 0      | G |
| 6 | BICF2S23444248         | 37726817 | G | 1   | 1      | A |
| 6 | BICF2P616926           | 37733580 | 0 | 0   | 0      | G |
| 6 | BICF2P135141           | 37750233 | A | 0   | 0      | C |
| 6 | BICF2P1099690          | 37757941 | A | 0   | 0      | C |
| 6 | BICF2S23116907         | 37769463 | A | 0   | 0      | G |
| 6 | BICF2P1252672          | 37779907 | A | 0   | 0      | G |
| 6 | TIGRP2P81865_rs8510463 | 37790693 | G | 0.5 | 0.2857 | A |
| 6 | BICF2P1195961          | 37814609 | A | 0   | 0.2143 | G |
| 6 | BICF2S22954515         | 37833543 | C | 0.5 | 0.2857 | A |
| 6 | BICF2S23316582         | 37835208 | 0 | 0   | 0      | G |
| 6 | BICF2S23318868         | 37838524 | G | 0.5 | 0.2857 | C |
| 6 | BICF2P904894           | 37851775 | A | 0.5 | 0.5    | G |
| 6 | TIGRP2P81880_rs8867532 | 37866160 | G | 0.5 | 0.5    | A |
| 6 | BICF2P473287           | 37869573 | 0 | 0   | 0      | C |
| 6 | BICF2P113284           | 37883214 | A | 0.5 | 0.7143 | G |
| 6 | BICF2S23710167         | 37899164 | G | 0   | 0      | A |
| 6 | BICF2P1022445          | 37906107 | A | 0.5 | 0.2857 | G |
| 6 | BICF2P943403           | 37916187 | C | 0   | 0      | A |
| 6 | BICF2S22915467         | 37928500 | A | 0   | 0      | G |
| 6 | BICF2P444831           | 37952568 | A | 0   | 0      | G |
| 6 | BICF2S24318032         | 37963463 | A | 0   | 0      | G |
| 6 | BICF2S23651907         | 37972683 | 0 | 0   | 0      | G |

|   |                        |          |   |     |        |   |
|---|------------------------|----------|---|-----|--------|---|
| 6 | BICF2S2294691          | 37980152 | A | 1   | 0.7857 | C |
| 6 | BICF2P767132           | 37993411 | C | 0   | 0.2143 | A |
| 6 | BICF2P1049668          | 37994310 | T | 0   | 0.2143 | A |
| 6 | BICF2P407791           | 37998070 | G | 0   | 0.2143 | A |
| 6 | BICF2S22956008         | 38015278 | A | 0   | 0      | G |
| 6 | BICF2P210530           | 38021005 | G | 0   | 0.2143 | A |
| 6 | BICF2P616063           | 38036956 | A | 0   | 0      | G |
| 6 | BICF2S23226072         | 38045531 | A | 0.5 | 0.5    | G |
| 6 | BICF2P206253           | 38062258 | G | 0.5 | 0.5    | A |
| 6 | BICF2S22932178         | 38073317 | A | 0.5 | 0.5    | G |
| 6 | BICF2P743582           | 38077439 | G | 0.5 | 0.5    | A |
| 6 | BICF2P276385           | 38094559 | T | 0   | 0      | A |
| 6 | BICF2S23543539         | 38106589 | A | 0   | 0      | G |
| 6 | BICF2P742566           | 38120369 | A | 0.5 | 0.2857 | T |
| 6 | BICF2P87819            | 38123773 | A | 0   | 0      | G |
| 6 | BICF2P3686             | 38142918 | A | 0   | 0      | G |
| 6 | BICF2S23628901         | 38156910 | A | 0   | 0      | G |
| 6 | BICF2P1290830          | 38164093 | C | 0.5 | 0.5    | A |
| 6 | BICF2P1290835          | 38166009 | G | 0.5 | 0.5    | A |
| 6 | BICF2S23718338         | 38172568 | A | 0   | 0.2143 | G |
| 6 | BICF2S23136468         | 38181100 | 0 | 0   | 0      | G |
| 6 | BICF2P243531           | 38197757 | A | 0   | 0.1667 | C |
| 6 | BICF2P2720             | 38204639 | A | 0   | 0      | G |
| 6 | BICF2P1071489          | 38223550 | A | 0   | 0      | G |
| 6 | BICF2S23225095         | 38234286 | A | 0   | 0.2143 | G |
| 6 | BICF2P1346517          | 38241901 | 0 | 0   | 0      | C |
| 6 | BICF2P383085           | 38255360 | A | 0   | 0      | G |
| 6 | BICF2P1456838          | 38267980 | G | 0.5 | 0.7143 | A |
| 6 | BICF2S23147489         | 38282584 | G | 0.5 | 0.7143 | A |
| 6 | BICF2P558681           | 38291428 | G | 0   | 0      | A |
| 6 | BICF2P351744           | 38295531 | 0 | 0   | 0      | A |
| 6 | BICF2P424335           | 38310726 | A | 0.5 | 0.7143 | G |
| 6 | BICF2P690951           | 38318994 | G | 0.5 | 0.7143 | A |
| 6 | BICF2P141283           | 38333093 | A | 0   | 0      | C |
| 6 | BICF2P638309           | 38352295 | A | 0   | 0      | C |
| 6 | BICF2P858494           | 38363969 | A | 0.5 | 0.2857 | G |
| 6 | BICF2P1042681          | 38381043 | A | 0.5 | 0.7143 | G |
| 6 | BICF2P640603           | 38387123 | C | 0   | 0      | G |
| 6 | TIGRP2P81978_rs8491947 | 38402424 | A | 0.5 | 0.7143 | C |
| 6 | BICF2P1261462          | 38420806 | 0 | 0   | 0      | G |
| 6 | BICF2P494616           | 38432722 | A | 0   | 0      | G |
| 6 | BICF2P7361             | 38434390 | A | 0   | 0      | G |
| 6 | BICF2P1213815          | 38443390 | 0 | 0   | 0      | G |
| 6 | BICF2S2359990          | 38452688 | 0 | 0   | 0      | G |
| 6 | BICF2S23014100         | 38458803 | A | 0   | 0      | G |
| 6 | BICF2P108486           | 38470951 | 0 | 0   | 0      | A |
| 6 | TIGRP2P81992_rs9139791 | 38481317 | G | 0   | 0      | A |



|   |                        |          |   |     |        |   |
|---|------------------------|----------|---|-----|--------|---|
| 6 | BICF2P1344784          | 38510576 | 0 | 0   | 0      | A |
| 6 | BICF2P666351           | 38524965 | 0 | 0   | 0      | G |
| 6 | BICF2P752788           | 38534827 | C | 1   | 1      | A |
| 6 | TIGRP2P82001_rs8592454 | 38550489 | 0 | 0   | 0      | C |
| 6 | BICF2S23158646         | 38579980 | G | 0.5 | 0.5    | A |
| 6 | BICF2S23128931         | 38583025 | A | 0   | 0.2143 | G |
| 6 | BICF2S23150947         | 38600876 | G | 0   | 0      | A |
| 6 | BICF2P335714           | 38625124 | 0 | 0   | 0      | A |
| 6 | BICF2S23629373         | 38633056 | 0 | 0   | 0      | A |
| 6 | BICF2P1178849          | 38662779 | A | 0   | 0      | T |
| 6 | BICF2S23150755         | 38667061 | A | 0   | 0      | G |
| 6 | BICF2S23522248         | 38681629 | A | 0   | 0      | C |
| 6 | BICF2P587687           | 38687902 | G | 0   | 0      | A |
| 6 | BICF2P1124640          | 38701052 | A | 0   | 0      | G |
| 6 | BICF2P417946           | 38709287 | A | 0.5 | 0.5    | G |
| 6 | BICF2S23444273         | 38722929 | 0 | 0   | 0      | G |
| 6 | BICF2P669211           | 38754499 | A | 0   | 0      | G |
| 6 | BICF2P1295914          | 38769259 | A | 0   | 0.2143 | G |
| 6 | BICF2P711852           | 38780562 | G | 0.5 | 0.5    | A |
| 6 | BICF2P1064392          | 38790954 | G | 1   | 0.7857 | C |
| 6 | BICF2P471832           | 38809126 | G | NA  | 0      | A |
| 6 | BICF2S23233217         | 38813022 | A | 0.5 | 0.5    | G |
| 6 | BICF2P850764           | 38826788 | 0 | 0   | 0      | G |
| 6 | BICF2P125101           | 38841160 | A | 1   | 1      | G |
| 6 | BICF2S23750116         | 38847611 | G | 0   | 0      | A |
| 6 | TIGRP2P82060_rs8936920 | 38866450 | G | 0.5 | 0.5    | A |
| 6 | TIGRP2P82061_rs8831115 | 38874616 | G | 1   | 1      | A |
| 6 | BICF2S23048443         | 38882220 | A | 0.5 | 0.2857 | G |
| 6 | TIGRP2P82066_rs9179165 | 38895107 | G | 1   | 1      | A |
| 6 | BICF2P1374533          | 38904648 | G | 0   | 0      | A |
| 6 | BICF2P811446           | 38917497 | G | 0.5 | 0.2857 | A |
| 6 | BICF2S23726560         | 38937454 | A | 0.5 | 0.2857 | G |
| 6 | BICF2S231825           | 38946999 | G | 0.5 | 0.2857 | A |
| 6 | BICF2P1125915          | 38952394 | A | 0.5 | 0.2857 | T |
| 6 | BICF2P931137           | 38972914 | G | 0.5 | 0.2857 | A |
| 6 | BICF2S23752604         | 38977150 | G | 0.5 | 0.2857 | A |
| 6 | TIGRP2P82094_rs9213568 | 38985085 | A | 0   | 0      | C |
| 6 | BICF2S23335303         | 38998482 | G | 0.5 | 0.2857 | A |
| 6 | BICF2P56247            | 39016297 | A | 0   | 0.2143 | C |
| 6 | BICF2P145105           | 39030866 | 0 | 0   | 0      | A |
| 6 | BICF2S2318200          | 39041602 | A | 0   | 0      | G |
| 6 | BICF2S23111522         | 39045439 | A | 1   | 0.7857 | G |
| 6 | BICF2P224708           | 39059715 | A | 1   | 1      | G |
| 6 | TIGRP2P82118_rs8883275 | 39071688 | C | 0   | 0.1667 | A |
| 6 | TIGRP2P82128_rs8874885 | 39082934 | A | 0   | 0      | G |
| 6 | BICF2S23017964         | 39097167 | A | 0   | 0.2143 | C |
| 6 | BICF2P401835           | 39102109 | A | 0   | 0.2143 | G |

|   |                        |          |   |     |        |   |
|---|------------------------|----------|---|-----|--------|---|
| 6 | BICF2S23239129         | 39119333 | A | 0   | 0      | G |
| 6 | BICF2P385097           | 39130174 | 0 | 0   | 0      | A |
| 6 | BICF2P126682           | 39135610 | 0 | 0   | 0      | G |
| 6 | BICF2P469300           | 39147439 | G | 0   | 0      | A |
| 6 | G397f45S191            | 39175400 | C | 0   | 0      | A |
| 6 | G397f51S65             | 39180736 | C | 0   | 0      | A |
| 6 | BICF2P1113015          | 39206608 | A | 0   | 0      | G |
| 6 | BICF2P1404105          | 39227888 | 0 | 0   | 0      | A |
| 6 | BICF2S2299926          | 39241175 | G | 0   | 0      | A |
| 6 | BICF2P5483             | 39258965 | C | 0   | 0      | A |
| 6 | BICF2S22962275         | 39292315 | G | 0   | 0      | C |
| 6 | BICF2P166449           | 39305769 | 0 | 0   | 0      | G |
| 6 | BICF2P314150           | 39381573 | 0 | 0   | 0      | G |
| 6 | BICF2P1035881          | 39388193 | G | 0   | 0      | A |
| 6 | TIGRP2P82142_rs8740405 | 39399290 | A | 0   | 0.2143 | G |
| 6 | BICF2P596134           | 39406405 | A | 0   | 0      | G |
| 6 | TIGRP2P82149_rs9232663 | 39411139 | A | 0   | 0.2143 | G |
| 6 | BICF2P1452402          | 39430624 | A | 0   | 0      | G |
| 6 | BICF2S23254241         | 39444791 | A | 0.5 | 0.2857 | G |
| 6 | BICF2P1249700          | 39455548 | G | 0.5 | 0.2857 | A |
| 6 | BICF2P1047220          | 39461101 | A | 0   | 0      | G |
| 6 | BICF2P769873           | 39476843 | A | 0   | 0      | C |
| 6 | BICF2P35354            | 39489638 | G | 0   | 0      | A |
| 6 | BICF2P930767           | 39495230 | G | 0   | 0      | A |
| 6 | BICF2P430522           | 39512453 | A | 0   | 0      | G |
| 6 | BICF2P544718           | 39514226 | A | 0.5 | 0.2857 | C |
| 6 | BICF2P480388           | 39534424 | A | 0   | 0      | G |
| 6 | BICF2P1158025          | 39543827 | A | 0.5 | 0.2857 | G |
| 6 | BICF2S22964848         | 39549562 | A | 0.5 | 0.2857 | G |
| 6 | BICF2P750001           | 39567170 | C | 0.5 | 0.2857 | A |
| 6 | BICF2P1270910          | 39572926 | C | 0   | 0      | A |
| 6 | BICF2S23255200         | 39588280 | A | 0   | 0      | G |
| 6 | BICF2P1040753          | 39608196 | G | 0   | 0      | A |
| 6 | BICF2P1277457          | 39658735 | 0 | 0   | 0      | G |
| 6 | TIGRP2P82226_rs8596784 | 39666177 | 0 | 0   | 0      | C |
| 6 | BICF2P624002           | 39694886 | C | 0   | 0      | A |
| 6 | TIGRP2P82245_rs9194876 | 39717597 | A | 0   | 0      | G |
| 6 | BICF2P100083           | 39724406 | 0 | 0   | 0      | C |
| 6 | BICF2P631961           | 39739075 | 0 | 0   | 0      | A |
| 6 | BICF2S23650477         | 39744764 | 0 | 0   | 0      | G |
| 6 | TIGRP2P82257_rs8762873 | 39763990 | A | 0   | 0      | G |
| 6 | BICF2P116916           | 39770725 | C | 0   | 0      | G |
| 6 | BICF2P254968           | 39785457 | A | 0   | 0      | G |
| 6 | BICF2P326205           | 39790061 | A | 0   | 0      | G |
| 6 | TIGRP2P82295_rs8675598 | 39803487 | C | 0   | 0      | G |
| 6 | TIGRP2P82304_rs9151866 | 39815984 | C | 0   | 0      | A |
| 6 | BICF2P475287           | 39834610 | 0 | 0   | 0      | G |

|   |                        |          |   |     |        |   |
|---|------------------------|----------|---|-----|--------|---|
| 6 | BICF2P158376           | 39839267 | A | 0.5 | 0.7143 | G |
| 6 | BICF2P317925           | 39857636 | 0 | 0   | 0      | C |
| 6 | BICF2P1338451          | 39875474 | A | 1   | 1      | G |
| 6 | BICF2P46043            | 39883104 | A | 0.5 | 0.2857 | G |
| 6 | BICF2P528992           | 39901942 | G | 1   | 1      | A |
| 6 | BICF2P927925           | 39906412 | G | 1   | 1      | A |
| 6 | BICF2P1443038          | 39917821 | A | 1   | 1      | G |
| 6 | BICF2P1230693          | 39921668 | A | 0   | 0      | G |
| 6 | TIGRP2P82318_rs9176573 | 39928177 | C | 0.5 | 0.7143 | A |
| 6 | BICF2P972810           | 39944085 | A | 0.5 | 0.2857 | G |
| 6 | BICF2S2413509          | 39959210 | A | 0.5 | 0.7143 | G |
| 6 | BICF2P377800           | 39971169 | 0 | 0   | 0      | C |
| 6 | TIGRP2P82328_rs8647916 | 39978030 | A | 0.5 | 0.7143 | G |
| 6 | BICF2P514679           | 39986503 | A | 0.5 | 0.7143 | G |
| 6 | TIGRP2P82331_rs9204292 | 40006529 | A | 0   | 0      | G |
| 6 | TIGRP2P82333_rs8820944 | 40013655 | A | 0.5 | 0.7143 | G |
| 6 | BICF2P1268953          | 40024815 | A | 0.5 | 0.7143 | G |
| 6 | BICF2P1207827          | 40060329 | 0 | 0   | 0      | C |
| 6 | BICF2P1470880          | 40066220 | 0 | 0   | 0      | C |
| 6 | BICF2S23240564         | 40082990 | G | 0   | 0      | A |
| 6 | BICF2P917312           | 40090406 | 0 | 0   | 0      | A |
| 6 | TIGRP2P82345_rs9145829 | 40102423 | 0 | 0   | 0      | G |
| 6 | BICF2P34730            | 40121002 | 0 | 0   | 0      | A |
| 6 | BICF2P1208269          | 40130382 | 0 | 0   | 0      | G |
| 6 | BICF2P1244040          | 40143620 | A | 0   | 0      | G |
| 6 | BICF2P583447           | 40151360 | G | 0.5 | 0.75   | A |
| 6 | BICF2P577842           | 40174119 | 0 | 0   | 0      | C |
| 6 | BICF2P188647           | 40189715 | A | 0.5 | 0.2857 | G |
| 6 | BICF2P523207           | 40195865 | G | 0.5 | 0.2857 | A |
| 6 | BICF2P388423           | 40204594 | 0 | 0   | 0      | A |
| 6 | BICF2P465621           | 40216157 | 0 | 0   | 0      | A |
| 6 | BICF2S23260000         | 40233163 | G | 0   | 0      | A |
| 6 | TIGRP2P82360_rs8808304 | 40245591 | G | 0.5 | 0.7143 | A |
| 6 | BICF2P521632           | 40263177 | G | 0.5 | 0.7143 | A |
| 6 | BICF2P347552           | 40273002 | 0 | 0   | 0      | A |
| 6 | BICF2P590590           | 40291348 | A | 0.5 | 0.2857 | G |
| 6 | TIGRP2P82364_rs8924787 | 40333250 | 0 | 0   | 0      | G |
| 6 | BICF2P1002980          | 40348648 | A | 0.5 | 0.7143 | G |
| 6 | BICF2P798098           | 40372939 | 0 | 0   | 0      | C |
| 6 | TIGRP2P82365_rs8825258 | 40378961 | G | 0.5 | 0.2857 | A |
| 6 | BICF2P107079           | 40393137 | G | 1   | 1      | A |
| 6 | BICF2P325599           | 40408680 | 0 | 0   | 0      | C |
| 6 | BICF2P30207            | 40413127 | 0 | 0   | 0      | C |
| 6 | BICF2S23243059         | 40438670 | A | 0   | 0      | G |
| 6 | TIGRP2P82368_rs8985569 | 40449811 | 0 | 0   | 0      | G |
| 6 | G400f26S231            | 40458049 | G | 0   | 0      | A |
| 6 | BICF2P650722           | 40479459 | 0 | 0   | 0      | G |

|   |                        |          |   |     |        |   |
|---|------------------------|----------|---|-----|--------|---|
| 6 | BICF2P747928           | 40480731 | A | 0.5 | 0.7143 | G |
| 6 | BICF2S232727           | 40500648 | A | 0   | 0      | G |
| 6 | BICF2S24321342         | 40511227 | 0 | 0   | 0      | G |
| 6 | BICF2P377224           | 40523887 | 0 | 0   | 0      | C |
| 6 | BICF2P745913           | 40531719 | 0 | 0   | 0      | G |
| 6 | BICF2P664527           | 40565216 | 0 | 0   | 0      | G |
| 6 | BICF2P1267273          | 40577287 | 0 | 0   | 0      | A |
| 6 | BICF2P1309992          | 40588805 | 0 | 0   | 0      | G |
| 6 | G401f21S190            | 40615389 | 0 | 0   | 0      | C |
| 6 | TIGRP2P82373_rs8584837 | 40624405 | A | 0.5 | 0.7143 | G |
| 6 | BICF2P380120           | 40637380 | A | 0.5 | 0.2857 | G |
| 6 | G402f22S83             | 40660449 | C | 0   | 0      | A |
| 6 | BICF2S24323195         | 40691228 | 0 | 0   | 0      | C |
| 6 | BICF2P824568           | 40695686 | A | 0.5 | 0.2857 | G |
| 6 | BICF2P1208076          | 40700326 | G | 0.5 | 0.2857 | A |
| 6 | BICF2P1429329          | 40711639 | A | 0   | 0      | G |
| 6 | BICF2P271071           | 40728680 | A | 0.5 | 0.2857 | G |
| 6 | TIGRP2P82396_rs8568148 | 40738969 | G | 0.5 | 0.2857 | A |
| 6 | BICF2S2356725          | 40753427 | G | 0.5 | 0.2857 | A |
| 6 | BICF2S23514279         | 40757288 | A | 0   | 0      | G |
| 6 | BICF2P885681           | 40814424 | A | 0   | 0      | C |
| 6 | BICF2P638257           | 40825157 | 0 | 0   | 0      | C |
| 6 | TIGRP2P82407_rs8876991 | 40843242 | A | 0   | 0      | C |
| 6 | BICF2P1162433          | 40864044 | 0 | 0   | 0      | G |
| 6 | BICF2P597754           | 40874673 | A | 0.5 | 0.7143 | T |
| 6 | TIGRP2P82422_rs9119151 | 40900427 | C | 0   | 0      | A |
| 6 | BICF2G630583378        | 40926819 | C | 0.5 | 0.75   | A |
| 6 | BICF2P1212375          | 40930695 | A | 0.5 | 0.7143 | G |
| 6 | TIGRP2P82438_rs9130780 | 40950258 | A | 0   | 0      | T |
| 6 | BICF2S23251760         | 40964426 | A | 0.5 | 0.75   | G |
| 6 | TIGRP2P82484_rs9228380 | 40974666 | A | 0.5 | 0.8    | G |
| 6 | TIGRP2P82485_rs8670960 | 40982343 | C | 0   | 0      | A |
| 6 | BICF2P1349009          | 40988939 | G | 0.5 | 0.7143 | A |
| 6 | BICF2P169561           | 40998112 | 0 | 0   | 0      | G |
| 6 | BICF2P1248342          | 41011763 | A | 0.5 | 0.7143 | G |
| 6 | BICF2P470796           | 41030604 | A | 0.5 | 0.7143 | G |
| 6 | BICF2P807798           | 41034460 | A | 0   | 0      | C |
| 6 | BICF2P97573            | 41050085 | G | 0   | 0      | A |
| 6 | BICF2P486922           | 41058989 | G | 0   | 0      | A |
| 6 | BICF2S23229527         | 41071588 | G | 0.5 | 0.2857 | A |
| 6 | BICF2P842137           | 41082779 | A | 0.5 | 0.7143 | G |
| 6 | BICF2P614427           | 41094646 | G | 0.5 | 0.2857 | A |
| 6 | BICF2P1229601          | 41109622 | C | NA  | 0.25   | A |
| 6 | BICF2P1035522          | 41118970 | C | 0.5 | 0.2857 | A |
| 6 | BICF2P333846           | 41131038 | A | 0.5 | 0.7143 | G |
| 6 | BICF2P555024           | 41136495 | A | 0.5 | 0.2857 | G |
| 6 | BICF2P1470009          | 41154425 | G | 0.5 | 0.2857 | A |

|   |                        |          |   |     |        |   |
|---|------------------------|----------|---|-----|--------|---|
| 6 | BICF2P105727           | 41160660 | 0 | 0   | 0      | A |
| 6 | BICF2P454034           | 41179557 | A | 0.5 | 0.7143 | G |
| 6 | BICF2P66878            | 41212458 | 0 | 0   | 0      | C |
| 6 | BICF2P37868            | 41224881 | A | 0.5 | 0.7143 | G |
| 6 | BICF2P37870            | 41227699 | 0 | 0   | 0      | G |
| 6 | BICF2S22965094         | 41239432 | G | 0   | 0      | A |
| 6 | TIGRP2P82503_rs9223425 | 41254421 | 0 | 0   | 0      | G |
| 6 | BICF2P645561           | 41265799 | 0 | 0   | 0      | G |
| 6 | BICF2S23137306         | 41302126 | G | 0   | 0      | A |
| 6 | G403f31S140            | 41326727 | 0 | 0   | 0      | A |
| 6 | BICF2P284636           | 41350090 | 0 | 0   | 0      | C |
| 6 | TIGRP2P82508_rs8788083 | 41371977 | 0 | 0   | 0      | G |
| 6 | BICF2S2306974          | 41387448 | A | 0.5 | 0.7143 | G |
| 6 | BICF2P1338820          | 41394346 | 0 | 0   | 0      | G |
| 6 | TIGRP2P82510_rs8753459 | 41409591 | 0 | 0   | 0      | C |
| 6 | G404f58S144            | 41420564 | A | 0.5 | 0.7143 | G |
| 6 | BICF2S23047377         | 41444590 | 0 | 0   | 0      | G |
| 6 | BICF2P1199587          | 41450996 | 0 | 0   | 0      | A |
| 6 | BICF2P683078           | 41458666 | 0 | 0   | 0      | A |
| 6 | BICF2P209193           | 41474386 | 0 | 0   | 0      | G |
| 6 | BICF2P820069           | 41481841 | A | 0.5 | 0.5    | C |
| 6 | BICF2P543483           | 41508915 | 0 | 0   | 0      | G |
| 6 | BICF2P1050333          | 41515948 | 0 | 0   | 0      | A |
| 6 | BICF2P276866           | 41539118 | 0 | 0   | 0      | T |
| 6 | BICF2P1145505          | 41561277 | 0 | 0   | 0      | C |
| 6 | BICF2P127326           | 41592520 | 0 | 0   | 0      | C |
| 6 | BICF2S2329231          | 41617520 | A | 0.5 | 0.2857 | G |
| 6 | BICF2S23639647         | 41628581 | G | 0.5 | 0.2857 | A |
| 6 | BICF2S23413953         | 41640418 | G | 0.5 | 0.2857 | A |
| 6 | BICF2P390703           | 41669277 | 0 | 0   | 0      | A |
| 6 | BICF2S22929078         | 41680668 | G | 0   | 0.2143 | A |
| 6 | BICF2P258497           | 41696876 | 0 | 0   | 0      | C |
| 6 | BICF2S23226277         | 41701574 | G | 0.5 | 0.5    | A |
| 6 | BICF2P710363           | 41715532 | 0 | 0   | 0      | C |
| 6 | TIGRP2P82519_rs8740502 | 41725543 | 0 | 0   | 0      | G |
| 6 | BICF2S23645268         | 41741045 | A | 0.5 | 0.5    | G |
| 6 | BICF2P874226           | 41768297 | 0 | 0   | 0      | G |
| 6 | BICF2P127018           | 41782634 | 0 | 0   | 0      | C |
| 6 | BICF2S23125546         | 41802735 | A | 0   | 0.2143 | G |
| 6 | BICF2P1422453          | 41816897 | C | 0.5 | 0.5    | G |
| 6 | BICF2P818983           | 41838838 | 0 | 0   | 0      | G |
| 6 | BICF2S23159703         | 41854286 | G | 0.5 | 0.5    | A |
| 6 | BICF2S23940            | 41862869 | 0 | 0   | 0      | G |
| 6 | BICF2P1280729          | 41874530 | 0 | 0   | 0      | C |
| 6 | BICF2S23133583         | 41891064 | 0 | 0   | 0      | C |
| 6 | BICF2S23138729         | 41894933 | G | 0.5 | 0.5    | A |
| 6 | BICF2P471036           | 41907433 | 0 | 0   | 0      | G |

|   |                        |          |   |     |        |   |
|---|------------------------|----------|---|-----|--------|---|
| 6 | BICF2P1183035          | 41937272 | 0 | 0   | 0      | G |
| 6 | BICF2S23330649         | 41942601 | A | 0.5 | 0.2857 | G |
| 6 | BICF2P1228611          | 41955258 | 0 | 0   | 0      | C |
| 6 | BICF2P838452           | 41971821 | 0 | 0   | 0      | G |
| 6 | BICF2S23410149         | 41982712 | G | 0.5 | 0.7143 | A |
| 6 | BICF2S2416476          | 42020965 | A | 0.5 | 0.2857 | G |
| 6 | TIGRP2P82534_rs8587251 | 42029289 | 0 | 0   | 0      | C |
| 6 | BICF2P245285           | 42042986 | 0 | 0   | 0      | C |
| 6 | BICF2P1418220          | 42063400 | 0 | 0   | 0      | G |
| 6 | BICF2P100332           | 42083178 | 0 | 0   | 0      | G |
| 6 | BICF2P838801           | 42095303 | 0 | 0   | 0      | T |
| 6 | BICF2S2299574          | 42133788 | G | 1   | 0.7857 | A |
| 6 | BICF2S2297073          | 42147204 | A | 1   | 0.7857 | G |
| 6 | BICF2S23149798         | 42152794 | A | 0.5 | 0.5    | G |
| 6 | TIGRP2P82536_rs9186665 | 42169128 | 0 | 0   | 0      | G |
| 6 | BICF2P256717           | 42175496 | 0 | 0   | 0      | G |
| 6 | BICF2S2363119          | 42190315 | G | 0.5 | 0.5    | A |
| 6 | BICF2P774856           | 42197004 | 0 | 0   | 0      | A |
| 6 | BICF2P245928           | 42209098 | A | 0.5 | 0.5    | G |
| 6 | BICF2S23150146         | 42224350 | A | 0.5 | 0.5    | G |
| 6 | BICF2S23161373         | 42239048 | G | 0.5 | 0.5    | A |
| 6 | BICF2P253184           | 42245037 | 0 | 0   | 0      | A |
| 6 | BICF2S22949706         | 42254682 | A | 0.5 | 0.5    | G |
| 6 | BICF2P238612           | 42276739 | 0 | 0   | 0      | A |
| 6 | BICF2S23622938         | 42325529 | A | 0.5 | 0.5    | G |
| 6 | BICF2S23522956         | 42351127 | A | 0   | 0      | G |
| 6 | BICF2S23651995         | 42358532 | A | 0.5 | 0.5    | G |
| 6 | BICF2P1465567          | 42375121 | 0 | 0   | 0      | G |
| 6 | BICF2P1027311          | 42383629 | 0 | 0   | 0      | G |
| 6 | BICF2S23355121         | 42392531 | A | 0.5 | 0.5    | G |
| 6 | BICF2S2325930          | 42408080 | A | 0   | 0      | G |
| 6 | BICF2S23028404         | 42421945 | G | 0.5 | 0.5    | A |
| 6 | BICF2S23210218         | 42434513 | A | 0   | 0      | G |
| 6 | BICF2S23223490         | 42437711 | A | 0.5 | 0.5    | G |
| 6 | BICF2P345996           | 42446503 | A | 0   | 0      | G |
| 6 | BICF2P693757           | 42458262 | G | 0   | 0      | A |
| 6 | BICF2P375468           | 42469811 | C | 0   | 0      | A |
| 6 | BICF2S23518221         | 42481317 | 0 | 0   | 0      | A |
| 6 | TIGRP2P82565_rs9161287 | 42499929 | C | 0   | 0      | A |
| 6 | TIGRP2P82569_rs8569081 | 42506456 | A | 0   | 0      | G |
| 6 | TIGRP2P82574_rs8910870 | 42523498 | G | 0   | 0      | A |
| 6 | BICF2P272231           | 42533530 | G | 0   | 0      | A |
| 6 | BICF2P108376           | 42546206 | A | 0   | 0.2143 | G |
| 6 | TIGRP2P82588_rs8808824 | 42557161 | A | 0.5 | 0.5    | G |
| 6 | BICF2S2299227          | 42567469 | A | 0   | 0      | G |
| 6 | BICF2P124134           | 42580374 | A | 0   | 0.2143 | G |
| 6 | TIGRP2P82596_rs9115315 | 42590620 | A | 0   | 0.2143 | G |

|   |                        |          |   |     |        |   |
|---|------------------------|----------|---|-----|--------|---|
| 6 | BICF2P329910           | 42604437 | A | 0   | 0.2143 | G |
| 6 | TIGRP2P82606_rs9175159 | 42611237 | A | 0   | 0.1667 | G |
| 6 | BICF2P460357           | 42624919 | G | 0   | 0.2143 | A |
| 6 | BICF2P956852           | 42634754 | A | 0   | 0.2143 | G |
| 6 | TIGRP2P82642_rs8842525 | 42645713 | 0 | 0   | 0      | C |
| 6 | BICF2P226765           | 42653572 | G | 0   | 0.2143 | A |
| 6 | BICF2P1153729          | 42675942 | 0 | 0   | 0      | G |
| 6 | BICF2S24112671         | 42687975 | G | 0   | 0.2143 | A |
| 6 | BICF2S22957863         | 42697860 | A | 0   | 0      | G |
| 6 | TIGRP2P82657_rs8659325 | 42709231 | A | NA  | 0      | G |
| 6 | BICF2P1233123          | 42719698 | 0 | 0   | 0      | C |
| 6 | BICF2P734463           | 42742293 | 0 | 0   | 0      | G |
| 6 | BICF2P180359           | 42753398 | 0 | 0   | 0      | A |
| 6 | BICF2P548213           | 42762830 | 0 | 0   | 0      | G |
| 6 | BICF2P413131           | 42770311 | 0 | NA  | 0      | A |
| 6 | BICF2S2346500          | 42795543 | A | 0   | 0      | G |
| 6 | BICF2P320839           | 42803624 | 0 | 0   | 0      | G |
| 6 | BICF2P390918           | 42822688 | 0 | 0   | 0      | A |
| 6 | TIGRP2P82658_rs8749998 | 42837240 | 0 | 0   | 0      | G |
| 6 | TIGRP2P82659_rs9175507 | 42846933 | G | 0.5 | 0.5    | A |
| 6 | BICF2P1185090          | 42868566 | 0 | 0   | 0      | G |
| 6 | BICF2P1260051          | 42875674 | 0 | 0   | 0      | G |
| 6 | BICF2P831408           | 42905208 | 0 | 0   | 0      | A |
| 6 | BICF2P860453           | 42935882 | 0 | 0   | 0      | T |
| 6 | BICF2P460737           | 42942330 | 0 | 0   | 0      | A |
| 6 | BICF2P1053878          | 42954128 | 0 | 0   | 0      | T |
| 6 | TIGRP2P82663_rs8851972 | 42964607 | 0 | 0   | 0      | C |
| 6 | BICF2S23232169         | 42982157 | A | 0   | 0      | G |
| 6 | BICF2G630583358        | 43044867 | 0 | 0   | 0      | G |
| 6 | TIGRP2P82664_rs9245163 | 43066870 | 0 | 0   | 0      | C |
| 6 | BICF2S24411171         | 43076649 | G | 0   | 0.2143 | A |
| 6 | BICF2S23413040         | 43086051 | A | 0.5 | 0.2857 | T |
| 6 | BICF2P1291438          | 43094598 | 0 | 0   | 0      | C |
| 6 | BICF2S23246875         | 43109773 | A | 0   | 0.2143 | C |
| 6 | TIGRP2P82667_rs8801624 | 43145836 | 0 | 0   | 0      | G |
| 6 | TIGRP2P82669_rs9164792 | 43160139 | A | 0.5 | 0.2857 | G |
| 6 | BICF2P475423           | 43179300 | 0 | 0   | 0      | G |
| 6 | TIGRP2P82670_rs8601122 | 43185201 | A | 0.5 | 0.5    | G |
| 6 | BICF2S23340246         | 43204556 | A | 0.5 | 0.2857 | G |
| 6 | BICF2S23221001         | 43222080 | A | 0   | 0      | G |
| 6 | BICF2P356644           | 43228633 | A | 0.5 | 0.5    | G |
| 6 | BICF2P544640           | 43240375 | 0 | 0   | 0      | G |
| 6 | BICF2P878324           | 43259247 | A | 0.5 | 0.2857 | G |
| 6 | BICF2P887364           | 43271887 | A | 0.5 | 0.5    | G |
| 6 | TIGRP2P82676_rs8871439 | 43276763 | A | 0.5 | 0.2857 | G |
| 6 | BICF2S2364709          | 43305453 | A | 0.5 | 0.25   | G |
| 6 | BICF2P911070           | 43316977 | G | 0.5 | 0.2857 | A |

|   |                        |          |   |     |        |   |
|---|------------------------|----------|---|-----|--------|---|
| 6 | BICF2P1327381          | 43320602 | A | 1   | 0.7857 | C |
| 6 | BICF2P593087           | 43343372 | 0 | 0   | 0      | C |
| 6 | BICF2P1426831          | 43355418 | 0 | 0   | 0      | G |
| 6 | BICF2P944683           | 43447406 | 0 | 0   | 0      | G |
| 6 | BICF2S22946647         | 43469953 | A | 0.5 | 0.5    | G |
| 6 | TIGRP2P82702_rs8793479 | 43473515 | 0 | 0   | 0      | C |
| 6 | BICF2P1432541          | 43528658 | 0 | 0   | 0      | G |
| 6 | TIGRP2P82723_rs8533334 | 43540897 | 0 | 0   | 0      | G |
| 6 | TIGRP2P82863_rs8563353 | 43630337 | 0 | NA  | 0      | C |
| 6 | BICF2P650324           | 43674374 | 0 | 0   | 0      | G |
| 6 | BICF2P824649           | 43803989 | A | 0.5 | 0.5    | G |
| 6 | G407f28S153            | 43825320 | 0 | 0   | 0      | A |
| 6 | BICF2P632566           | 43845453 | 0 | 0   | 0      | C |
| 6 | BICF2S23423870         | 43872797 | 0 | 0   | 0      | C |
| 6 | TIGRP2P82947_rs9165461 | 43890484 | G | 0.5 | 0.5    | C |
| 6 | BICF2P656356           | 43900327 | 0 | 0   | 0      | A |
| 6 | BICF2P1106924          | 43913490 | C | 0   | 0      | A |
| 6 | BICF2P562935           | 43927209 | G | 0   | 0      | A |
| 6 | TIGRP2P82953_rs8825422 | 43935349 | C | 0   | 0      | A |
| 6 | BICF2P1434203          | 43955158 | A | 0   | 0      | C |
| 6 | BICF2P1503372          | 43988357 | G | 0   | 0      | A |
| 6 | BICF2P325299           | 44019007 | 0 | 0   | 0      | G |
| 6 | BICF2P38035            | 44048043 | A | 0   | 0      | G |
| 6 | TIGRP2P83036_rs8807189 | 44078303 | 0 | 0   | 0      | T |
| 6 | BICF2P781189           | 44127692 | A | 0   | 0      | G |
| 6 | BICF2P965097           | 44137228 | C | 0   | 0      | A |
| 6 | BICF2P232378           | 44149636 | 0 | 0   | 0      | G |
| 6 | BICF2P672090           | 44176909 | A | 0   | 0.2143 | C |
| 6 | BICF2S23633763         | 44193880 | G | 0   | 0.2143 | A |
| 6 | BICF2P1035658          | 44206691 | G | 0   | 0.2143 | A |
| 6 | BICF2P693306           | 44290198 | A | 1   | 0.7857 | G |
| 6 | BICF2S23019666         | 44319426 | A | 1   | 0.7857 | G |
| 6 | BICF2P744202           | 44328418 | A | 0   | 0.2143 | G |
| 6 | BICF2P175607           | 44337390 | G | 0   | 0.2143 | A |
| 6 | BICF2P638850           | 44352638 | G | 0   | 0.2143 | A |
| 6 | TIGRP2P83058_rs8874745 | 44362770 | C | 0   | 0      | A |
| 6 | BICF2P753177           | 44370579 | G | 0   | 0.2143 | A |
| 6 | BICF2P1045010          | 44380673 | G | 0   | 0      | A |
| 6 | TIGRP2P83076_rs8823878 | 44398926 | 0 | 0   | 0      | G |
| 6 | BICF2P768779           | 44406077 | 0 | 0   | 0      | A |
| 6 | TIGRP2P83080_rs8934333 | 44415959 | 0 | 0   | 0      | G |
| 6 | BICF2S23447042         | 44426801 | T | 0   | 0      | A |
| 6 | BICF2S23429697         | 44441933 | G | 0   | 0      | A |
| 6 | BICF2P1001481          | 44442529 | G | 0   | 0      | A |
| 6 | BICF2P1168545          | 44447920 | G | 0   | 0      | A |
| 6 | BICF2P639391           | 44470107 | G | 0   | 0      | A |
| 6 | BICF2P240889           | 44478783 | C | 1   | 0.7857 | A |



|   |                        |          |   |     |        |   |
|---|------------------------|----------|---|-----|--------|---|
| 6 | BICF2P692331           | 44486881 | G | 0   | 0      | A |
| 6 | TIGRP2P83100_rs8711827 | 44489827 | C | 0   | 0      | A |
| 6 | BICF2P1469694          | 44502797 | 0 | 0   | 0      | A |
| 6 | BICF2S22953868         | 44505782 | G | 0   | 0      | A |
| 6 | BICF2S22953873         | 44506219 | A | 0   | 0      | G |
| 6 | BICF2P1411250          | 44527433 | A | 0   | 0      | C |
| 6 | BICF2P473843           | 44532862 | G | 0   | 0      | A |
| 6 | TIGRP2P83118_rs9252268 | 44538337 | A | 0   | 0      | T |
| 6 | BICF2P312891           | 44545121 | A | 0   | 0      | T |
| 6 | BICF2P358881           | 44558651 | 0 | 0   | 0      | G |
| 6 | BICF2P356356           | 44567311 | A | 1   | 0.7857 | G |
| 6 | TIGRP2P83144_rs8864515 | 44576846 | 0 | 0   | 0      | C |
| 6 | BICF2P965517           | 44592582 | C | 0   | 0.2143 | A |
| 6 | BICF2P965520           | 44595201 | G | 0   | 0.2143 | A |
| 6 | TIGRP2P83154_rs8967842 | 44598417 | A | 0   | 0.2143 | G |
| 6 | TIGRP2P83163_rs8589110 | 44608978 | A | 0   | 0.2143 | G |
| 6 | BICF2S2308025          | 44640934 | G | 0.5 | 0.25   | A |
| 6 | BICF2P142921           | 44644259 | A | 0.5 | 0.2857 | G |
| 6 | BICF2P158240           | 44673155 | G | 0   | 0.2143 | A |
| 6 | BICF2P589028           | 44687464 | 0 | 0   | 0      | A |
| 6 | BICF2P914298           | 44692097 | A | 0   | 0      | G |
| 6 | BICF2P1251644          | 44702348 | G | 0   | 0.2143 | A |
| 6 | BICF2P881640           | 44713623 | G | 0   | 0.2143 | A |
| 6 | BICF2P1201462          | 44728001 | A | 0   | 0      | G |
| 6 | BICF2P1233304          | 44744655 | A | 0   | 0.2143 | C |
| 6 | BICF2P950644           | 44755569 | A | 0   | 0.2143 | C |
| 6 | BICF2S23153204         | 44758787 | A | 0   | 0      | C |
| 6 | TIGRP2P83206_rs9114311 | 44780583 | A | 0   | 0      | C |
| 6 | TIGRP2P83214_rs9080268 | 44796738 | G | 0.5 | 0.2857 | A |
| 6 | BICF2S23547434         | 44812525 | G | 0   | 0      | A |
| 6 | BICF2S23152700         | 44818324 | G | 0.5 | 0.2857 | A |
| 6 | BICF2P195837           | 44835595 | A | 0   | 0      | G |
| 6 | BICF2P855459           | 44840032 | 0 | 0   | 0      | C |
| 6 | BICF2P809445           | 44854371 | G | 0.5 | 0.2857 | A |
| 6 | BICF2S22930362         | 44864803 | G | 0.5 | 0.2857 | A |
| 6 | BICF2P963441           | 44881101 | 0 | 0   | 0      | G |
| 6 | BICF2P435461           | 44887168 | 0 | 0   | 0      | C |
| 6 | BICF2S23134832         | 44906045 | G | 0   | 0      | C |
| 6 | BICF2S23137750         | 44909456 | G | 0.5 | 0.2857 | A |
| 6 | BICF2S23624618         | 44932620 | G | 0.5 | 0.5    | C |
| 6 | BICF2P314100           | 44945317 | 0 | 0   | 0      | A |
| 6 | BICF2P1240855          | 44955927 | 0 | 0   | 0      | G |
| 6 | BICF2P1376856          | 44966477 | A | 0   | 0      | C |
| 6 | BICF2S245561           | 44980601 | G | 0.5 | 0.7143 | A |
| 6 | BICF2P295210           | 44990741 | 0 | 0   | 0      | C |
| 6 | BICF2S23142184         | 45009038 | G | 0.5 | 0.7143 | A |
| 6 | BICF2S23438301         | 45012177 | A | 0.5 | 0.7143 | G |

|   |                        |          |   |     |        |   |
|---|------------------------|----------|---|-----|--------|---|
| 6 | BICF2S2372183          | 45025251 | A | 0.5 | 0.7143 | G |
| 6 | BICF2S2318329          | 45034143 | G | 0.5 | 0.7143 | A |
| 6 | BICF2P87264            | 45047223 | C | 0.5 | 0.5    | A |
| 6 | BICF2P287904           | 45061492 | 0 | 0   | 0      | G |
| 6 | BICF2P922649           | 45073046 | G | 0.5 | 0.5    | A |
| 6 | TIGRP2P83247_rs8685200 | 45083688 | C | 0   | 0      | A |
| 6 | BICF2P1180537          | 45084289 | A | 0   | 0      | G |
| 6 | BICF2P884054           | 45100137 | A | 0.5 | 0.5    | C |
| 6 | BICF2P1056242          | 45111817 | A | 0   | 0      | G |
| 6 | BICF2P1461305          | 45117411 | A | 0.5 | 0.5    | G |
| 6 | TIGRP2P83299_rs8595006 | 45132220 | A | 0   | 0      | C |
| 6 | BICF2S22912808         | 45145421 | G | 0.5 | 0.2857 | A |
| 6 | BICF2P1260232          | 45150260 | G | 0.5 | 0.2857 | A |
| 6 | BICF2P394841           | 45165418 | G | 0.5 | 0.7143 | A |
| 6 | BICF2P478588           | 45169539 | A | 0.5 | 0.7143 | G |
| 6 | BICF2P478589           | 45169984 | C | 0.5 | 0.2857 | A |
| 6 | TIGRP2P83315_rs9172750 | 45172289 | A | 0.5 | 0.7143 | T |
| 6 | TIGRP2P83317_rs8930730 | 45184033 | A | 0.5 | 0.7143 | G |
| 6 | BICF2P758479           | 45203340 | A | 0   | 0      | T |
| 6 | TIGRP2P83325_rs9122843 | 45211932 | T | 0   | 0.2143 | A |
| 6 | BICF2P847827           | 45221393 | A | 0   | 0.2143 | G |
| 6 | TIGRP2P83338_rs8764544 | 45238852 | G | 0.5 | 0.2857 | A |
| 6 | BICF2P1044167          | 45239383 | C | 0.5 | 0.2857 | A |
| 6 | BICF2S23335797         | 45263678 | A | 0.5 | 0.2857 | G |
| 6 | TIGRP2P83343_rs8934741 | 45269837 | G | 1   | 0.8333 | A |
| 6 | BICF2P724165           | 45270247 | C | 0.5 | 0.2857 | A |
| 6 | BICF2P829871           | 45286606 | A | 0.5 | 0.2857 | G |
| 6 | TIGRP2P83378_rs9061250 | 45308601 | A | 0.5 | 0.2857 | G |
| 6 | TIGRP2P83381_rs8521667 | 45318935 | G | 0.5 | 0.2857 | A |
| 6 | BICF2P959003           | 45326706 | C | 0.5 | 0.2857 | G |
| 6 | BICF2P211351           | 45333329 | G | 0.5 | 0.2857 | A |
| 6 | TIGRP2P83385_rs8853062 | 45345813 | A | 0.5 | 0.2857 | G |
| 6 | BICF2S22936827         | 45371197 | 0 | 0   | 0      | A |
| 6 | BICF2S23657959         | 45390026 | G | 0   | 0      | A |
| 6 | BICF2P540128           | 45395030 | A | 0   | 0      | G |
| 6 | TIGRP2P83398_rs8748884 | 45405447 | A | 0.5 | 0.2857 | G |
| 6 | BICF2P752394           | 45418245 | C | 0.5 | 0.2857 | A |
| 6 | TIGRP2P83404_rs9037460 | 45442278 | A | 0.5 | 0.2857 | G |
| 6 | BICF2S2358335          | 45451813 | G | 0.5 | 0.7143 | C |
| 6 | BICF2P576655           | 45481486 | G | 0.5 | 0.2857 | A |
| 6 | TIGRP2P83408_rs9007050 | 45485982 | A | 0.5 | 0.5    | C |
| 6 | BICF2P1128536          | 45502090 | A | 0   | 0      | T |
| 6 | BICF2P542453           | 45514290 | G | 0   | 0      | A |
| 6 | TIGRP2P83415_rs8804615 | 45523037 | G | 0.5 | 0.5    | A |
| 6 | BICF2P1285401          | 45537541 | G | 0.5 | 0.5    | A |
| 6 | BICF2P4446             | 45546506 | 0 | 0   | 0      | A |
| 6 | BICF2S2356387          | 45565916 | C | 0   | 0      | A |

|   |                        |          |   |     |        |   |
|---|------------------------|----------|---|-----|--------|---|
| 6 | BICF2P1191784          | 45584496 | 0 | 0   | 0      | G |
| 6 | BICF2P1278057          | 45588807 | 0 | 0   | 0      | C |
| 6 | BICF2S23522279         | 45598714 | A | 0   | 0      | G |
| 6 | TIGRP2P83425_rs8584594 | 45616526 | A | 0   | 0      | G |
| 6 | BICF2P326117           | 45626014 | G | 0   | 0      | A |
| 6 | BICF2P673707           | 45639169 | A | 0   | 0      | G |
| 6 | BICF2P79320            | 45646399 | A | 0   | 0      | G |
| 6 | TIGRP2P83437_rs9203777 | 45648696 | G | 0.5 | 0.5    | A |
| 6 | BICF2P1245285          | 45657062 | C | 0   | 0      | A |
| 6 | BICF2P800622           | 45662210 | G | 0   | 0      | A |
| 6 | BICF2P334641           | 45681961 | A | 0.5 | 0.5    | C |
| 6 | BICF2S229195           | 45694092 | A | 0   | 0      | G |
| 6 | BICF2S23746911         | 45708756 | G | 0.5 | 0.5    | A |
| 6 | BICF2P263269           | 45717167 | A | 0.5 | 0.5    | C |
| 6 | TIGRP2P83480_rs8947391 | 45741262 | 0 | 0   | 0      | G |
| 6 | BICF2P384881           | 45757001 | A | 0.5 | 0.5    | T |
| 6 | BICF2S22918393         | 45759310 | G | 0   | 0.2143 | A |
| 6 | BICF2P1016467          | 45779658 | G | 0   | 0      | A |
| 6 | BICF2P684324           | 45793691 | G | 0   | 0      | C |
| 6 | BICF2P860611           | 45809304 | A | 0   | 0      | G |
| 6 | BICF2P545637           | 45817036 | G | 0   | 0      | A |
| 6 | BICF2P448508           | 45830328 | A | 0   | 0      | G |
| 6 | BICF2P613899           | 45842240 | A | 0   | 0      | C |
| 6 | BICF2P1161279          | 45858168 | A | 0   | 0      | G |
| 6 | BICF2P1242528          | 45863274 | G | 0   | 0      | A |
| 6 | BICF2P414454           | 45876941 | A | 0   | 0      | G |
| 6 | BICF2S2369232          | 45885564 | A | 0   | 0      | G |
| 6 | BICF2P1247084          | 45920235 | G | 0   | 0      | A |
| 6 | BICF2P124860           | 45944706 | 0 | 0   | 0      | A |
| 6 | BICF2S23725012         | 45960779 | A | 0   | 0      | G |
| 6 | BICF2P571355           | 45967090 | C | 0.5 | 0.7143 | A |
| 6 | BICF2P1306687          | 45981789 | A | 0   | 0      | G |
| 6 | BICF2P278088           | 45988803 | 0 | 0   | 0      | G |
| 6 | BICF2P392977           | 46000101 | 0 | 0   | 0      | A |
| 6 | TIGRP2P83499_rs8742017 | 46018998 | G | 0.5 | 0.7143 | A |
| 6 | BICF2P1166715          | 46028473 | A | 0   | 0      | G |
| 6 | BICF2S23123071         | 46038590 | A | 0.5 | 0.7143 | C |
| 6 | BICF2P82228            | 46052557 | A | 0.5 | 0.7143 | G |
| 6 | BICF2S2354522          | 46064414 | G | 0   | 0      | A |
| 6 | BICF2P493305           | 46086113 | 0 | 0   | 0      | G |
| 6 | TIGRP2P83513_rs8922998 | 46102620 | C | 1   | 1      | G |
| 6 | BICF2P1387781          | 46111441 | A | 1   | 1      | T |
| 6 | BICF2G630583170        | 46113969 | A | 0   | 0      | G |
| 6 | BICF2P543630           | 46159294 | T | 0   | 0      | A |
| 6 | BICF2P1055256          | 46172183 | A | 0   | 0      | G |
| 6 | BICF2P252371           | 46174960 | G | 0.5 | 0.7857 | A |
| 6 | BICF2S2301470          | 46189211 | A | 0.5 | 0.2143 | G |

|   |                        |          |   |     |        |   |
|---|------------------------|----------|---|-----|--------|---|
| 6 | BICF2P769363           | 46196396 | G | 0.5 | 0.2143 | A |
| 6 | G409f20S151            | 46207632 | G | 0   | 0      | A |
| 6 | BICF2P398823           | 46237398 | 0 | 0   | 0      | G |
| 6 | BICF2G630582945        | 46241784 | G | 0   | 0      | A |
| 6 | BICF2S2411308          | 46260837 | 0 | 0   | 0      | A |
| 6 | BICF2S23619636         | 46286303 | A | 0   | 0      | G |
| 6 | BICF2S23429553         | 46288605 | 0 | 0   | 0      | G |
| 6 | BICF2G630582935        | 46302186 | A | 1   | 1      | G |
| 6 | BICF2G630582896        | 46324309 | G | 0   | 0      | A |
| 6 | BICF2G630582883        | 46337424 | G | 1   | 1      | A |
| 6 | BICF2S23744983         | 46357393 | A | 0   | 0      | G |
| 6 | BICF2G630582862        | 46377890 | A | 0   | 0      | G |
| 6 | BICF2S2396561          | 46384614 | A | 0   | 0      | G |
| 6 | BICF2P349207           | 46409947 | 0 | 0   | 0      | A |
| 6 | TIGRP2P83587_rs8717585 | 46417148 | G | 0   | 0      | A |
| 6 | BICF2G630582858        | 46417330 | A | 0   | 0      | C |
| 6 | BICF2G630582850        | 46428414 | G | 0   | 0      | A |
| 6 | BICF2P580504           | 46438333 | G | 0   | 0      | A |
| 6 | BICF2G630582828        | 46451659 | G | 0   | 0      | A |
| 6 | BICF2G630582813        | 46462966 | C | 0   | 0      | A |
| 6 | BICF2P1360670          | 46481714 | A | 0.5 | 0.2    | G |
| 6 | BICF2G630582785        | 46486559 | G | 0.5 | 0.7143 | A |
| 6 | TIGRP2P83621_rs8670219 | 46509617 | A | 0.5 | 0.2857 | C |
| 6 | BICF2P179473           | 46513276 | A | 0.5 | 0.25   | G |
| 6 | BICF2G630582770        | 46521889 | C | 1   | 1      | A |
| 6 | BICF2G630582765        | 46529263 | A | 0.5 | 0.7143 | G |
| 6 | BICF2G630582749        | 46553202 | G | 0   | 0      | A |
| 6 | BICF2S2312826          | 46573447 | G | 0.5 | 0.2857 | A |
| 6 | BICF2P1208338          | 46576643 | A | 0.5 | 0.7143 | G |
| 6 | BICF2S23231431         | 46589392 | A | 0.5 | 0.5    | C |
| 6 | BICF2G630582713        | 46600521 | A | 0   | 0      | G |
| 6 | BICF2P100296           | 46612866 | A | 0   | 0      | G |
| 6 | BICF2S23627125         | 46627286 | A | 0   | 0      | G |
| 6 | BICF2G630582681        | 46634603 | A | 0   | 0.2143 | G |
| 6 | BICF2G630582674        | 46644010 | A | 0.5 | 0.2857 | G |
| 6 | BICF2G630582669        | 46676229 | G | 0.5 | 0.5    | A |
| 6 | TIGRP2P83666_rs9087317 | 46687254 | A | 0   | 0.2143 | G |
| 6 | BICF2P1346280          | 46700129 | 0 | 0   | 0      | G |
| 6 | TIGRP2P83668_rs8720923 | 46702560 | G | 0   | 0      | A |
| 6 | BICF2P783189           | 46721318 | G | 0.5 | 0.5    | A |
| 6 | BICF2P989329           | 46724877 | A | 0.5 | 0.5    | C |
| 6 | BICF2P989331           | 46725107 | G | 0.5 | 0.5    | A |
| 6 | BICF2S23410961         | 46727399 | A | 0.5 | 0.5    | G |
| 6 | BICF2S23410964         | 46727686 | G | 0.5 | 0.5    | A |
| 6 | BICF2S23548750         | 46736825 | A | 0.5 | 0.5    | G |
| 6 | BICF2P157571           | 46756392 | A | 0.5 | 0.5    | T |
| 6 | BICF2G630582665        | 46762916 | A | 0.5 | 0.5    | G |

|   |                        |          |   |     |        |   |
|---|------------------------|----------|---|-----|--------|---|
| 6 | BICF2P190896           | 46776467 | A | 0   | 0      | G |
| 6 | BICF2P409388           | 46792939 | G | 0   | 0      | A |
| 6 | TIGRP2P83694_rs9009157 | 46811136 | G | 0.5 | 0.7143 | A |
| 6 | BICF2P533256           | 46821059 | A | 0   | 0      | G |
| 6 | TIGRP2P83701_rs8899721 | 46830649 | G | 0.5 | 0.7143 | A |
| 6 | TIGRP2P83707_rs9059362 | 46844067 | G | 0.5 | 0.7143 | A |
| 6 | BICF2P1189358          | 46851035 | G | 0.5 | 0.5    | A |
| 6 | BICF2G630582664        | 46867218 | A | 0   | 0      | G |
| 6 | BICF2S2346993          | 46881279 | G | 0   | 0.2143 | A |
| 6 | BICF2P1248138          | 46890293 | 0 | 0   | 0      | A |
| 6 | BICF2P355023           | 46899944 | 0 | 0   | 0      | T |
| 6 | BICF2P1322179          | 46909750 | 0 | 0   | 0      | A |
| 6 | BICF2P865490           | 46935722 | G | 0.5 | 0.7143 | A |
| 6 | BICF2P1220403          | 46938206 | G | 0.5 | 0.7143 | A |
| 6 | BICF2P1220419          | 46943133 | A | 0.5 | 0.7143 | G |
| 6 | BICF2P613887           | 46959061 | A | 0   | 0.2143 | G |
| 6 | BICF2G630582659        | 46966648 | A | 0   | 0      | C |
| 6 | TIGRP2P83749_rs8674599 | 46978926 | A | 0   | 0.2143 | C |
| 6 | BICF2S2316381          | 46994759 | G | 0.5 | 0.7143 | A |
| 6 | BICF2S2312096          | 47010192 | A | 0   | 0      | G |
| 6 | BICF2S23510682         | 47017805 | A | 0.5 | 0.7143 | G |
| 6 | TIGRP2P83763_rs8556585 | 47027453 | A | 0   | 0      | G |
| 6 | BICF2P1451427          | 47037718 | G | 0.5 | 0.75   | A |
| 6 | BICF2G630582647        | 47048879 | A | 0   | 0      | G |
| 6 | BICF2G630582612        | 47066688 | G | 0   | 0.1667 | A |
| 6 | BICF2G630582600        | 47070408 | G | 0.5 | 0.7143 | A |
| 6 | BICF2G630582579        | 47083257 | G | 0.5 | 0.7143 | A |
| 6 | BICF2P653078           | 47092714 | A | 1   | 1      | G |
| 6 | BICF2P1008950          | 47112247 | A | 0.5 | 0.5    | G |
| 6 | BICF2P1359976          | 47119206 | G | 0.5 | 0.5    | A |
| 6 | BICF2P101763           | 47127895 | A | 0.5 | 0.5    | G |
| 6 | BICF2G630582555        | 47149732 | G | 0.5 | 0.5    | A |
| 6 | BICF2P1460534          | 47152278 | G | 0.5 | 0.5    | A |
| 6 | BICF2G630582545        | 47165932 | C | 0   | 0.2143 | A |
| 6 | BICF2G630582528        | 47174046 | A | 0   | 0      | G |
| 6 | BICF2G630582513        | 47186240 | A | 0   | 0      | G |
| 6 | BICF2G630582502        | 47193832 | G | 0   | 0      | A |
| 6 | BICF2G630582499        | 47196549 | A | 0   | 0.2143 | G |
| 6 | BICF2P1047812          | 47209971 | 0 | 0   | 0      | G |
| 6 | BICF2S23241318         | 47227461 | G | 0   | 0      | A |
| 6 | BICF2G630582485        | 47231693 | G | 0   | 0      | A |
| 6 | TIGRP2P83807_rs8725065 | 47250562 | 0 | 0   | 0      | A |
| 6 | BICF2G630582483        | 47275149 | G | 0.5 | 0.5    | A |
| 6 | BICF2G630582474        | 47285674 | A | 0   | 0      | G |
| 6 | BICF2S23532442         | 47298074 | G | 0   | 0      | A |
| 6 | BICF2G630582465        | 47304818 | A | 0   | 0      | G |
| 6 | BICF2G630582461        | 47323335 | A | 0   | 0.2143 | T |

|   |                        |          |   |     |        |   |
|---|------------------------|----------|---|-----|--------|---|
| 6 | BICF2S23152321         | 47341662 | G | 0   | 0      | A |
| 6 | BICF2G630582457        | 47350941 | A | 0   | 0.2143 | T |
| 6 | BICF2G630582447        | 47358162 | A | 0   | 0.2143 | G |
| 6 | BICF2G630582433        | 47377782 | T | 0   | 0.2143 | A |
| 6 | BICF2G630582430        | 47378348 | C | 0   | 0      | A |
| 6 | BICF2G630582423        | 47380062 | G | 0   | 0      | A |
| 6 | BICF2G630582390        | 47394370 | C | 0   | 0      | G |
| 6 | BICF2G630582370        | 47411590 | G | 1   | 0.7857 | A |
| 6 | BICF2G630582352        | 47425617 | A | 0.5 | 0.5    | G |
| 6 | BICF2S23058224         | 47428212 | G | 0.5 | 0.5    | A |
| 6 | BICF2G630582336        | 47445318 | G | 0.5 | 0.5    | A |
| 6 | BICF2G630582334        | 47451965 | A | 0   | 0      | G |
| 6 | BICF2S23616949         | 47461051 | A | 0   | 0      | G |
| 6 | BICF2G630582314        | 47474985 | A | 1   | 0.7857 | G |
| 6 | BICF2G630582297        | 47484024 | G | 0.5 | 0.5    | A |
| 6 | BICF2G630582287        | 47499702 | A | 0.5 | 0.5    | G |
| 6 | BICF2G630582267        | 47513385 | A | 0.5 | 0.5    | G |
| 6 | BICF2G630582253        | 47518001 | A | 0   | 0      | G |
| 6 | BICF2G630582227        | 47531282 | A | 0   | 0.2143 | G |
| 6 | BICF2P1333121          | 47547864 | A | 0   | 0      | G |
| 6 | BICF2P66202            | 47560062 | A | 0   | 0      | C |
| 6 | BICF2P1007646          | 47569732 | G | 0.5 | 0.5    | A |
| 6 | BICF2P1118843          | 47585210 | G | 0   | 0      | A |
| 6 | BICF2P1167508          | 47588740 | C | 0   | 0      | A |
| 6 | BICF2P1137213          | 47609802 | G | 0.5 | 0.2857 | A |
| 6 | BICF2S23657099         | 47610159 | A | 0.5 | 0.7143 | G |
| 6 | BICF2P146897           | 47621605 | G | 0   | 0.2143 | A |
| 6 | BICF2P127827           | 47642241 | O | 0   | 0      | A |
| 6 | BICF2P1054196          | 47645414 | G | 0.5 | 0.7143 | A |
| 6 | BICF2P8422             | 47657027 | A | 0.5 | 0.2857 | C |
| 6 | BICF2S23325321         | 47672181 | A | 0.5 | 0.2857 | G |
| 6 | TIGRP2P83838_rs9050267 | 47686913 | C | 0.5 | 0.5    | A |
| 6 | BICF2G630582189        | 47703928 | G | 0   | 0.25   | A |
| 6 | BICF2P511193           | 47719197 | A | 0   | 0      | G |
| 6 | BICF2G630582170        | 47740449 | G | 0   | 0.2143 | A |
| 6 | BICF2P1406286          | 47765541 | A | 0   | 0      | C |
| 6 | BICF2G630582163        | 47772856 | A | 0.5 | 0.7143 | C |
| 6 | BICF2G630582161        | 47773599 | G | 0.5 | 0.7143 | A |
| 6 | BICF2G630582153        | 47785482 | A | 0.5 | 0.7143 | G |
| 6 | BICF2G630582143        | 47798202 | A | 0   | 0.2143 | G |
| 6 | BICF2G630582137        | 47809260 | A | 0.5 | 0.7143 | G |
| 6 | BICF2G630582127        | 47822338 | G | 0   | 0.2143 | A |
| 6 | BICF2G630582116        | 47831580 | A | 0   | 0.2143 | T |
| 6 | BICF2G630582097        | 47841295 | G | 0   | 0.2143 | A |
| 6 | BICF2G630582077        | 47852295 | A | 0   | 0.2143 | G |
| 6 | BICF2P567177           | 47870597 | O | 0   | 0      | G |
| 6 | BICF2G630582055        | 47883316 | G | 0   | 0.2143 | A |

|   |                        |          |   |     |        |   |
|---|------------------------|----------|---|-----|--------|---|
| 6 | BICF2G630582044        | 47896705 | A | 0.5 | 0.7143 | G |
| 6 | BICF2S23027501         | 47904110 | G | 0   | 0      | A |
| 6 | BICF2G630582030        | 47913040 | G | 0   | 0      | A |
| 6 | BICF2P387874           | 47915871 | G | 0.5 | 0.5    | A |
| 6 | BICF2G630582015        | 47920640 | A | 0.5 | 0.5    | G |
| 6 | BICF2G630581994        | 47940117 | A | 0   | 0      | G |
| 6 | BICF2P544401           | 47949507 | 0 | 0   | 0      | A |
| 6 | BICF2G630581984        | 47964300 | A | 0   | 0      | C |
| 6 | BICF2S23639529         | 47975941 | A | 0   | 0.2143 | G |
| 6 | BICF2G630581961        | 47979203 | A | 0   | 0      | G |
| 6 | BICF2S23636696         | 47996686 | A | 0   | 0.2143 | G |
| 6 | BICF2G630581934        | 48008750 | G | 0   | 0      | A |
| 6 | BICF2G630581925        | 48018321 | A | 0.5 | 0.7143 | G |
| 6 | BICF2G630581897        | 48032471 | A | 0.5 | 0.7143 | G |
| 6 | BICF2P851629           | 48039192 | A | 0   | 0      | G |
| 6 | BICF2S23258979         | 48048470 | G | 0.5 | 0.7143 | A |
| 6 | BICF2S23554976         | 48067262 | G | 0.5 | 0.7143 | A |
| 6 | BICF2S23710284         | 48080996 | A | 0   | 0      | G |
| 6 | BICF2G630581857        | 48092675 | A | 0   | 0.2143 | G |
| 6 | BICF2G630581856        | 48093457 | A | 0   | 0.2143 | G |
| 6 | BICF2P697055           | 48114045 | 0 | 0   | 0      | C |
| 6 | BICF2P1003157          | 48159909 | A | 0   | 0.2143 | G |
| 6 | BICF2P1102956          | 48171288 | A | 0.5 | 0.5    | G |
| 6 | BICF2S23013662         | 48177785 | A | 0   | 0      | G |
| 6 | BICF2G630581834        | 48191766 | G | 0   | 0      | A |
| 6 | BICF2P393964           | 48204148 | A | 0   | 0      | G |
| 6 | TIGRP2P83859_rs9113657 | 48229660 | 0 | 0   | 0      | C |
| 6 | BICF2S2311481          | 48231136 | A | 0   | 0.1    | T |
| 6 | BICF2G630581819        | 48245639 | C | 0   | 0.2143 | A |
| 6 | BICF2G630581814        | 48255905 | G | 0   | 0.2143 | C |
| 6 | BICF2G630581789        | 48267526 | A | 0   | 0.2143 | C |
| 6 | BICF2G630581772        | 48279291 | G | 0   | 0.2143 | A |
| 6 | BICF2G630581752        | 48292569 | A | 0   | 0.2143 | G |
| 6 | BICF2G630581742        | 48302285 | G | 0   | 0.2143 | A |
| 6 | BICF2G630581720        | 48313162 | G | 0   | 0.2143 | A |
| 6 | BICF2G630581699        | 48324366 | G | 0   | 0.2143 | A |
| 6 | BICF2G630581677        | 48343895 | A | 1   | 0.7857 | G |
| 6 | BICF2P603223           | 48357138 | G | 0   | 0      | A |
| 6 | BICF2G630581673        | 48358157 | A | 0   | 0      | G |
| 6 | G410f46S266            | 48398094 | 0 | 0   | 0      | C |
| 6 | TIGRP2P83865_rs8855498 | 48406280 | A | 0   | 0      | G |
| 6 | TIGRP2P83866_rs9140083 | 48420393 | C | 0   | 0      | A |
| 6 | BICF2G630581661        | 48426674 | G | 0   | 0      | A |
| 6 | BICF2G630581649        | 48450847 | G | 0   | 0      | C |
| 6 | TIGRP2P83874_rs8897028 | 48466647 | A | 0.5 | 0.5714 | G |
| 6 | BICF2G630581581        | 48479402 | A | 0   | 0.2143 | C |
| 6 | BICF2G630581556        | 48485914 | A | 0   | 0.1667 | G |

|   |                        |          |   |     |        |   |
|---|------------------------|----------|---|-----|--------|---|
| 6 | BICF2G630581538        | 48497029 | A | 0.5 | 0.2857 | G |
| 6 | BICF2G630581503        | 48520737 | A | 0.5 | 0.2857 | C |
| 6 | TIGRP2P83893_rs8732055 | 48537551 | A | 0   | 0      | G |
| 6 | TIGRP2P83899_rs8574273 | 48545314 | A | 0   | 0      | C |
| 6 | BICF2G630581461        | 48558150 | A | 0   | 0.2143 | G |
| 6 | BICF2P1231142          | 48565734 | G | 0   | 0      | A |
| 6 | BICF2G630581404        | 48581241 | A | 1   | 0.7857 | G |
| 6 | BICF2G630581361        | 48605508 | G | 0   | 0      | A |
| 6 | BICF2G630581353        | 48610629 | G | 1   | 0.7857 | A |
| 6 | BICF2G630581313        | 48631630 | G | 1   | 0.7857 | A |
| 6 | BICF2G630581308        | 48635309 | A | 0   | 0.2143 | G |
| 6 | BICF2G630581290        | 48649281 | G | 1   | 0.7857 | A |
| 6 | BICF2G630581278        | 48658266 | A | 0   | 0      | G |
| 6 | BICF2G630581256        | 48676742 | A | 0   | 0      | G |
| 6 | BICF2G630581243        | 48689171 | A | 0   | 0      | G |
| 6 | BICF2G630581237        | 48694538 | G | 0   | 0      | A |
| 6 | BICF2P1103323          | 48708440 | G | 0   | 0      | A |
| 6 | BICF2G630581200        | 48718465 | A | 0   | 0      | G |
| 6 | BICF2P463689           | 48731534 | 0 | 0   | 0      | G |
| 6 | BICF2G630581155        | 48745323 | A | 0   | 0      | G |
| 6 | BICF2G630581152        | 48750619 | G | 0   | 0      | A |
| 6 | BICF2G630581124        | 48763898 | A | 0   | 0      | T |
| 6 | BICF2G630581104        | 48774446 | G | 0   | 0      | A |
| 6 | BICF2G630581090        | 48792294 | A | 0   | 0.2143 | G |
| 6 | BICF2G630581074        | 48803152 | C | 0   | 0.2143 | G |
| 6 | BICF2G630581070        | 48806498 | G | 0   | 0      | A |
| 6 | BICF2G630581030        | 48817770 | C | 0   | 0      | A |
| 6 | BICF2G630580994        | 48834628 | G | 0   | 0      | A |
| 6 | BICF2G630580979        | 48847143 | G | 0   | 0      | A |
| 6 | BICF2G630580959        | 48854142 | A | 0   | 0      | G |
| 6 | BICF2G630580924        | 48863621 | G | 0   | 0      | A |
| 6 | BICF2G630580903        | 48877877 | A | 0   | 0.1429 | G |
| 6 | BICF2G630580879        | 48887492 | G | 0   | 0.1429 | A |
| 6 | BICF2G630580873        | 48907705 | G | 0   | 0.1429 | A |
| 6 | BICF2G630580868        | 48916088 | A | 0   | 0.1429 | G |
| 6 | BICF2P326433           | 48924088 | G | 0   | 0      | C |
| 6 | BICF2P1298264          | 48938931 | G | 0   | 0      | A |
| 6 | BICF2G630580816        | 48947374 | G | 0   | 0.1429 | A |
| 6 | BICF2G630580796        | 48958476 | C | 0   | 0      | A |
| 6 | BICF2G630580763        | 48968287 | A | 0   | 0      | C |
| 6 | BICF2S23313448         | 48984367 | T | 1   | 0.7857 | A |
| 6 | BICF2G630580739        | 48992720 | G | 0   | 0      | A |
| 6 | BICF2G630580738        | 49003572 | A | 0   | 0      | C |
| 6 | G411f35S91             | 49028457 | G | 0   | 0.1429 | A |
| 6 | TIGRP2P84012_rs9030224 | 49037573 | T | 0   | 0.1429 | A |
| 6 | BICF2G630580730        | 49053507 | G | 1   | 0.7857 | A |
| 6 | BICF2G630580692        | 49065111 | A | 0   | 0      | G |



|   |                        |          |   |     |        |   |
|---|------------------------|----------|---|-----|--------|---|
| 6 | BICF2G630580671        | 49076407 | A | 0   | 0      | G |
| 6 | BICF2G630580657        | 49089177 | C | 0   | 0      | A |
| 6 | BICF2G630580644        | 49096835 | G | 0   | 0.1429 | A |
| 6 | BICF2G630580603        | 49115442 | A | 0   | 0      | G |
| 6 | BICF2G630580587        | 49123797 | A | 0   | 0      | G |
| 6 | BICF2G630580560        | 49134858 | G | 0   | 0.1429 | A |
| 6 | BICF2G630580556        | 49139715 | G | 0   | 0.1429 | A |
| 6 | BICF2G630580536        | 49151401 | G | 0   | 0.1429 | A |
| 6 | BICF2G630580494        | 49166663 | A | 0   | 0      | G |
| 6 | TIGRP2P84030_rs8652786 | 49177620 | G | 0   | 0.1429 | A |
| 6 | BICF2G630580456        | 49186053 | G | 0   | 0.1429 | A |
| 6 | BICF2G630580436        | 49206902 | G | 0   | 0.1429 | A |
| 6 | BICF2G630580426        | 49210554 | A | 0   | 0      | G |
| 6 | BICF2G630580413        | 49223347 | C | 0   | 0.2143 | A |
| 6 | BICF2G630580390        | 49232855 | G | 0   | 0.1429 | A |
| 6 | BICF2G630580358        | 49265837 | A | 0.5 | 0.3571 | G |
| 6 | TIGRP2P84035_rs8936608 | 49266772 | A | 0.5 | 0.5714 | G |
| 6 | BICF2P277513           | 49277708 | A | 0.5 | 0.5714 | C |
| 6 | BICF2G630580319        | 49292521 | G | 0.5 | 0.3571 | A |
| 6 | BICF2G630580310        | 49303094 | G | 0   | 0.2143 | A |
| 6 | BICF2P205874           | 49316258 | C | 0   | 0      | A |
| 6 | TIGRP2P84044_rs8553175 | 49333257 | 0 | 0   | 0      | A |
| 6 | BICF2G630580305        | 49337568 | G | 0   | 0      | A |
| 6 | BICF2G630580278        | 49352402 | G | 0   | 0      | A |
| 6 | BICF2G630580265        | 49358113 | A | 0   | 0.2143 | G |
| 6 | BICF2G630580261        | 49375557 | C | 0.5 | 0.5    | A |
| 6 | BICF2G630580236        | 49381013 | G | 0.5 | 0.5    | A |
| 6 | BICF2G630580229        | 49396340 | 0 | 0   | 0      | A |
| 6 | BICF2G630580209        | 49408294 | A | 0.5 | 0.5    | G |
| 6 | BICF2G630580164        | 49429543 | A | 0.5 | 0.5    | G |
| 6 | BICF2G630580126        | 49441876 | A | 0.5 | 0.5    | G |
| 6 | BICF2G630580110        | 49450836 | C | 0.5 | 0.4167 | A |
| 6 | BICF2G630580099        | 49470952 | A | 1   | 0.8333 | C |
| 6 | BICF2S23637916         | 49476811 | A | 0   | 0      | G |
| 6 | BICF2G630580085        | 49487556 | A | 0   | 0.2143 | G |
| 6 | BICF2G630580066        | 49497052 | A | 0   | 0      | G |
| 6 | BICF2G630580036        | 49508640 | A | 0.5 | 0.5714 | G |
| 6 | TIGRP2P84083_rs8847582 | 49526827 | C | 1   | 0.8571 | A |
| 6 | BICF2P893515           | 49527485 | A | 0.5 | 0.5714 | G |
| 6 | BICF2P893514           | 49527525 | C | 1   | 0.8571 | A |
| 6 | BICF2G630580026        | 49531469 | G | 0   | 0.1429 | A |
| 6 | TIGRP2P84098_rs8763809 | 49542664 | A | 0   | 0.1429 | G |
| 6 | BICF2P233539           | 49575223 | A | 0   | 0.2143 | C |
| 6 | BICF2P897008           | 49581353 | A | 0   | 0.2143 | G |
| 6 | BICF2G630580017        | 49589832 | G | 1   | 0.7857 | A |
| 6 | BICF2G630579994        | 49601671 | A | 0   | 0      | G |
| 6 | BICF2G630579938        | 49617679 | G | 0   | 0.1429 | A |

|   |                 |          |   |     |        |   |
|---|-----------------|----------|---|-----|--------|---|
| 6 | BICF2G630579880 | 49631898 | G | 0   | 0.2143 | A |
| 6 | BICF2G630579863 | 49635652 | A | 0   | 0.2143 | G |
| 6 | BICF2G630579834 | 49645556 | G | 0.5 | 0.5    | A |
| 6 | BICF2G630579774 | 49669755 | G | 0   | 0      | A |
| 6 | BICF2G630579755 | 49680642 | G | 0   | 0.1429 | A |
| 6 | BICF2G630579708 | 49691970 | A | 0   | 0.1429 | G |
| 6 | BICF2G630579687 | 49703690 | A | 0   | 0.2143 | G |
| 6 | BICF2G630579655 | 49718157 | G | 0   | 0.1667 | A |
| 6 | BICF2G630579640 | 49729171 | C | 0   | 0      | A |
| 6 | BICF2G630579617 | 49737814 | A | 0   | 0.1429 | G |
| 6 | BICF2G630579604 | 49749115 | G | 0   | 0.2143 | A |
| 6 | BICF2G630579578 | 49762025 | G | 0   | 0.2143 | A |
| 6 | BICF2G630579546 | 49777952 | G | 0   | 0.2143 | A |
| 6 | BICF2G630579521 | 49791754 | G | 0   | 0.2143 | A |
| 6 | BICF2G630579503 | 49796598 | A | 0   | 0.2143 | G |
| 6 | BICF2G630579438 | 49811933 | G | 0   | 0.1429 | A |
| 6 | BICF2G630579427 | 49819918 | G | 0   | 0.1429 | A |
| 6 | BICF2G630579388 | 49832241 | G | 0   | 0.1429 | A |
| 6 | BICF2G630579376 | 49844494 | G | 0   | 0.1429 | A |
| 6 | BICF2S23645696  | 49862835 | 0 | 0   | 0      | A |
| 6 | BICF2G630579345 | 49864519 | G | 0   | 0      | A |
| 6 | BICF2G630579298 | 49878134 | G | 0   | 0.1429 | A |
| 6 | BICF2G630579239 | 49897116 | G | 0   | 0.1429 | A |
| 6 | BICF2G630579206 | 49904862 | C | 0   | 0      | A |
| 6 | BICF2G630579181 | 49910864 | C | 0   | 0      | A |
| 6 | BICF2G630579147 | 49929983 | G | 0   | 0      | A |
| 6 | BICF2G630579143 | 49939993 | A | 0   | 0      | C |
| 6 | BICF2G630579115 | 49951873 | A | 0   | 0      | G |
| 6 | BICF2S23418149  | 49963509 | 0 | 0   | 0      | A |
| 6 | BICF2G630579063 | 49974800 | A | 0   | 0      | G |
| 6 | BICF2G630579054 | 49980725 | G | 0   | 0      | A |
| 6 | BICF2G630579022 | 49994795 | C | 0   | 0      | G |
| 6 | BICF2G630579015 | 50002986 | A | 0   | 0      | G |
| 6 | BICF2S23128755  | 50014113 | A | 0   | 0      | G |
| 6 | BICF2G630578878 | 50038983 | G | 0   | 0      | A |
| 6 | BICF2G630578834 | 50054324 | A | 0   | 0      | G |
| 6 | BICF2G630578764 | 50070854 | G | 0   | 0      | A |
| 6 | BICF2G630578757 | 50072604 | A | 0   | 0      | G |
| 6 | BICF2G630578739 | 50074785 | G | 0   | 0      | A |
| 6 | BICF2G630578701 | 50081582 | G | 0   | 0      | A |
| 6 | BICF2G630578688 | 50083337 | G | 0   | 0      | C |
| 6 | BICF2S2364759   | 50096774 | A | 0   | 0      | G |
| 6 | BICF2G630578654 | 50107043 | A | 0   | 0.1667 | C |
| 6 | BICF2G630578645 | 50117443 | G | 0   | 0.2143 | A |
| 6 | BICF2G630578634 | 50138041 | G | 0   | 0.2143 | A |
| 6 | BICF2G630578631 | 50140939 | A | 0   | 0.2143 | G |
| 6 | BICF2G630578618 | 50151607 | A | 0   | 0.2143 | G |

|   |                        |          |   |     |        |   |
|---|------------------------|----------|---|-----|--------|---|
| 6 | BICF2P364371           | 50178771 | 0 | 0   | 0      | G |
| 6 | BICF2S24111128         | 50207512 | 0 | 0   | 0      | T |
| 6 | TIGRP2P84170_rs8724995 | 50224070 | 0 | 0   | 0      | C |
| 6 | BICF2G630578597        | 50236868 | G | 0   | 0      | A |
| 6 | TIGRP2P84172_rs8855256 | 50250458 | 0 | 0   | 0      | A |
| 6 | BICF2P906181           | 50275399 | 0 | 0   | 0      | A |
| 6 | BICF2S24414109         | 50279603 | A | 0   | 0      | G |
| 6 | BICF2P1414726          | 50289884 | 0 | 0   | 0      | A |
| 6 | BICF2S23657635         | 50305655 | A | 0   | 0      | G |
| 6 | BICF2P435171           | 50325246 | 0 | 0   | 0      | A |
| 6 | BICF2P324601           | 50346779 | 0 | 0   | 0      | A |
| 6 | BICF2P674423           | 50355207 | 0 | 0   | 0      | A |
| 6 | BICF2S2446666          | 50368346 | C | 0   | 0      | A |
| 6 | BICF2P779463           | 50392548 | 0 | 0   | 0      | A |
| 6 | BICF2S23216050         | 50398634 | G | 0   | 0      | A |
| 6 | BICF2S2419161          | 50417782 | 0 | 0   | 0      | A |
| 6 | BICF2P1348390          | 50434290 | G | 0   | 0      | A |
| 6 | TIGRP2P84183_rs8459244 | 50442468 | A | 0   | 0      | G |
| 6 | BICF2S23747486         | 50462501 | G | 0.5 | 0.5    | A |
| 6 | BICF2G630578581        | 50476532 | A | 0.5 | 0.5    | C |
| 6 | BICF2P1192352          | 50486970 | 0 | 0   | 0      | G |
| 6 | TIGRP2P84195_rs8953406 | 50530784 | G | 0.5 | 0.3333 | A |
| 6 | BICF2P605383           | 50541379 | G | 0.5 | 0.5    | A |
| 6 | TIGRP2P84204_rs9131713 | 50545691 | A | 0.5 | 0.5    | C |
| 6 | BICF2P786254           | 50559320 | A | 0.5 | 0.5    | C |
| 6 | BICF2P1111847          | 50565561 | T | 0.5 | 0.5    | A |
| 6 | BICF2P1407101          | 50580649 | A | 0.5 | 0.5    | T |
| 6 | BICF2P341544           | 50596830 | A | 0.5 | 0.5    | C |
| 6 | BICF2S23512255         | 50607813 | A | 0   | 0      | G |
| 6 | BICF2P129158           | 50613518 | 0 | 0   | 0      | A |
| 6 | BICF2G630578570        | 50626848 | G | 0.5 | 0.3571 | A |
| 6 | BICF2S2371165          | 50637655 | A | 0.5 | 0.3571 | G |
| 6 | BICF2P402007           | 50651168 | 0 | 0   | 0      | C |
| 6 | BICF2P793490           | 50657972 | G | 0.5 | 0.6429 | A |
| 6 | BICF2P186757           | 50669892 | 0 | 0   | 0      | G |
| 6 | BICF2G630578544        | 50686527 | G | 0   | 0.1429 | A |
| 6 | BICF2P772149           | 50695929 | A | 0   | 0.1429 | G |
| 6 | BICF2P1271985          | 50711296 | A | 0.5 | 0.5    | G |
| 6 | BICF2G630578515        | 50718190 | A | 0.5 | 0.3333 | G |
| 6 | BICF2P325270           | 50735161 | C | 0.5 | 0.7    | A |
| 6 | BICF2S2326998          | 50745973 | A | 0.5 | 0.6429 | G |
| 6 | BICF2S2342454          | 50754948 | 0 | 0   | 0      | A |
| 6 | BICF2P271370           | 50769707 | G | 0.5 | 0.6429 | A |
| 6 | BICF2P759150           | 50774028 | A | 0   | 0      | G |
| 6 | BICF2G630578492        | 50788895 | A | 0.5 | 0.3571 | G |
| 6 | BICF2S23419786         | 50794847 | G | 0.5 | 0.25   | A |
| 6 | BICF2S23439549         | 50795906 | G | 0.5 | 0.3571 | A |

|   |                        |          |   |     |        |   |
|---|------------------------|----------|---|-----|--------|---|
| 6 | BICF2P1412857          | 50817118 | A | 1   | 1      | G |
| 6 | TIGRP2P84267_rs8689818 | 50820138 | 0 | 0   | 0      | A |
| 6 | BICF2S23543302         | 50840709 | G | 0   | 0      | A |
| 6 | BICF2G630578460        | 50850133 | G | 0.5 | 0.6429 | A |
| 6 | BICF2G630578446        | 50853880 | C | 0.5 | 0.6429 | A |
| 6 | BICF2G630578426        | 50873401 | T | 0.5 | 0.5    | A |
| 6 | BICF2P217427           | 50878953 | G | 0   | 0      | A |
| 6 | BICF2G630578396        | 50896306 | A | 1   | 1      | G |
| 6 | BICF2G630578392        | 50899201 | A | 0   | 0.1429 | G |
| 6 | BICF2G630578369        | 50919952 | A | 0   | 0.1429 | G |
| 6 | BICF2G630578361        | 50925380 | A | 0   | 0.1429 | G |
| 6 | TIGRP2P84294_rs9081125 | 50937008 | A | 0   | 0.1429 | G |
| 6 | BICF2S23324600         | 50948226 | G | 0   | 0.1429 | A |
| 6 | BICF2G630578312        | 50963604 | G | 0   | 0.1429 | A |
| 6 | BICF2G630578299        | 50970899 | A | 0   | 0.1429 | G |
| 6 | BICF2G630578274        | 50979981 | A | 0   | 0.1429 | G |
| 6 | TIGRP2P84392_rs8800484 | 51009395 | A | 0.5 | 0.5    | G |
| 6 | BICF2G630578228        | 51015592 | A | 0   | 0      | C |
| 6 | BICF2G630578215        | 51025719 | G | 0.5 | 0.5    | A |
| 6 | BICF2G630578200        | 51039873 | A | 0.5 | 0.5    | G |
| 6 | BICF2G630578175        | 51054684 | A | 0   | 0      | G |
| 6 | BICF2G630578162        | 51062253 | A | 0   | 0      | C |
| 6 | BICF2P1298576          | 51071891 | A | 0.5 | 0.3333 | G |
| 6 | TIGRP2P84404_rs8702631 | 51083561 | 0 | 0   | 0      | A |
| 6 | BICF2G630578121        | 51102194 | G | 1   | 0.8571 | A |
| 6 | BICF2G630578117        | 51108192 | G | 0.5 | 0.3571 | A |
| 6 | BICF2P551638           | 51121317 | G | 0   | 0      | A |
| 6 | BICF2G630578073        | 51137756 | A | 0.5 | 0.3    | C |
| 6 | BICF2G630578061        | 51140531 | G | 0   | 0.1429 | A |
| 6 | BICF2P616335           | 51155248 | A | 0   | 0      | G |
| 6 | BICF2G630578016        | 51169192 | A | 0   | 0.1429 | G |
| 6 | BICF2P1026090          | 51184949 | G | 0   | 0      | A |
| 6 | BICF2P554732           | 51191303 | C | 0   | 0      | A |
| 6 | BICF2P1363905          | 51206177 | 0 | 0   | 0      | C |
| 6 | BICF2S23116185         | 51217907 | A | 0.5 | 0.5    | G |
| 6 | BICF2P566631           | 51230949 | C | 0   | 0      | A |
| 6 | BICF2S2457791          | 51234835 | A | 0   | 0      | C |
| 6 | BICF2G630577981        | 51283942 | G | 0   | 0      | A |
| 6 | BICF2G630577980        | 51284495 | C | 0   | 0      | A |
| 6 | BICF2P199109           | 51293708 | T | 0.5 | 0.6429 | A |
| 6 | BICF2G630577966        | 51303440 | A | 0.5 | 0.6429 | G |
| 6 | BICF2G630577963        | 51313430 | A | 0   | 0      | G |
| 6 | BICF2G630577952        | 51335380 | A | 0   | 0.1429 | G |
| 6 | BICF2G630577950        | 51338730 | G | 0   | 0.1429 | A |
| 6 | BICF2P1368320          | 51350686 | A | 0.5 | 0.5    | G |
| 6 | BICF2G630577939        | 51378480 | A | 0   | 0      | C |
| 6 | BICF2P925741           | 51383225 | G | 0   | 0      | A |

|   |                        |          |   |     |        |   |
|---|------------------------|----------|---|-----|--------|---|
| 6 | BICF2P164492           | 51402101 | A | 0   | 0      | G |
| 6 | BICF2G630577893        | 51414407 | C | 0   | 0      | A |
| 6 | BICF2G630577889        | 51417872 | A | 0.5 | 0.5    | G |
| 6 | BICF2G630577831        | 51459305 | A | 0   | 0.1429 | G |
| 6 | TIGRP2P84476_rs8955307 | 51463197 | 0 | 0   | 0      | A |
| 6 | BICF2G630577827        | 51476844 | A | 0   | 0      | C |
| 6 | BICF2G630577812        | 51490240 | A | 0   | 0      | G |
| 6 | TIGRP2P84486_rs8875982 | 51503579 | A | 0   | 0      | G |
| 6 | BICF2G630577804        | 51503980 | T | 0   | 0      | A |
| 6 | BICF2G630577797        | 51511338 | A | 0   | 0      | G |
| 6 | TIGRP2P84488_rs8947193 | 51521081 | 0 | 0   | 0      | G |
| 6 | BICF2G630577760        | 51540241 | A | 0   | 0      | G |
| 6 | BICF2G630577752        | 51546636 | A | 0   | 0      | G |
| 6 | BICF2G630577737        | 51555175 | A | 0.5 | 0.6429 | C |
| 6 | BICF2G630577701        | 51571538 | A | 0   | 0      | G |
| 6 | BICF2G630577693        | 51578177 | A | 1   | 1      | G |
| 6 | BICF2G630577680        | 51597706 | G | 1   | 1      | A |
| 6 | BICF2G630577671        | 51604112 | G | 0   | 0      | A |
| 6 | BICF2G630577644        | 51627437 | T | 0   | 0      | A |
| 6 | BICF2G630577627        | 51637213 | A | 0.5 | 0.6429 | G |
| 6 | BICF2G630577620        | 51643360 | A | 0   | 0      | G |
| 6 | BICF2G630577611        | 51646503 | G | 0.5 | 0.6429 | A |
| 6 | BICF2G630577568        | 51660838 | G | 0   | 0      | C |
| 6 | BICF2G630577546        | 51669719 | G | 0.5 | 0.7143 | A |
| 6 | BICF2G630577532        | 51683308 | A | 0.5 | 0.6429 | C |
| 6 | BICF2P278281           | 51695202 | G | 0.5 | 0.6429 | A |
| 6 | TIGRP2P84498_rs8849528 | 51722661 | A | 0   | 0      | C |
| 6 | TIGRP2P84500_rs8888142 | 51727338 | A | 0   | 0      | G |
| 6 | BICF2G630577512        | 51733135 | G | 1   | 1      | A |
| 6 | BICF2G630577506        | 51738612 | C | 0   | 0      | A |
| 6 | BICF2G630577487        | 51750565 | A | 0   | 0      | G |
| 6 | BICF2G630577479        | 51756705 | A | 0   | 0      | G |
| 6 | BICF2G630577462        | 51770071 | C | 0   | 0      | A |
| 6 | BICF2G630577457        | 51772780 | C | 0.5 | 0.2857 | A |
| 6 | BICF2G630577451        | 51775677 | A | 0.5 | 0.2857 | C |
| 6 | BICF2G630577440        | 51789800 | A | 0   | 0.3571 | C |
| 6 | BICF2G630577432        | 51806111 | A | 0.5 | 0.2857 | G |
| 6 | BICF2G630577427        | 51808173 | A | 0   | 0      | G |
| 6 | BICF2S23418290         | 51820056 | A | 0   | 0      | G |
| 6 | BICF2S23422559         | 51836672 | 0 | 0   | 0      | C |
| 6 | BICF2G630577405        | 51843795 | G | 0   | 0      | A |
| 6 | BICF2G630577398        | 51854319 | A | 0   | 0      | G |
| 6 | BICF2P1322717          | 51865767 | G | 0   | 0      | A |
| 6 | BICF2G630577383        | 51884582 | A | 0.5 | 0.3571 | G |
| 6 | BICF2S23032956         | 51890820 | A | 0.5 | 0.6    | G |
| 6 | BICF2P915289           | 51894974 | G | 0.5 | 0.6429 | A |
| 6 | BICF2P691612           | 51900124 | A | 0   | 0      | G |

|   |                        |          |   |     |        |   |
|---|------------------------|----------|---|-----|--------|---|
| 6 | BICF2G630577352        | 51909734 | A | 0.5 | 0.2857 | G |
| 6 | BICF2G630577347        | 51912265 | A | 1   | 0.6429 | G |
| 6 | TIGRP2P84554_rs8975894 | 51924408 | G | 0   | 0      | A |
| 6 | BICF2G630577295        | 51939996 | A | 0   | 0      | G |
| 6 | BICF2G630577270        | 51947882 | A | 1   | 0.6429 | G |
| 6 | BICF2P634885           | 51957442 | A | 0   | 0      | C |
| 6 | BICF2G630577232        | 51973593 | A | 0   | 0      | G |
| 6 | BICF2G630577197        | 51981658 | A | 0   | 0      | G |
| 6 | BICF2G630577173        | 51995662 | G | 0   | 0      | A |
| 6 | BICF2G630577158        | 52003113 | A | 0   | 0      | C |
| 6 | BICF2G630577146        | 52015962 | G | 0   | 0      | A |
| 6 | BICF2P51505            | 52027328 | G | 0.5 | 0.2857 | A |
| 6 | BICF2G630577114        | 52044851 | A | 1   | 1      | G |
| 6 | BICF2P12489            | 52049289 | A | 0   | 0      | G |
| 6 | BICF2P541894           | 52061435 | A | 0   | 0      | G |
| 6 | BICF2S23529291         | 52077655 | A | 0   | 0      | G |
| 6 | BICF2P288912           | 52087988 | A | 0   | 0      | G |
| 6 | BICF2G630577080        | 52096843 | G | 0   | 0      | A |
| 6 | BICF2G630577075        | 52117598 | A | 0   | 0      | G |
| 6 | BICF2G630577072        | 52125165 | G | 0   | 0      | A |
| 6 | BICF2P1112774          | 52129674 | A | 0.5 | 0.2857 | C |
| 6 | BICF2P929029           | 52136027 | A | 0.5 | 0.7143 | G |
| 6 | TIGRP2P84636_rs9035902 | 52143379 | C | 0.5 | 0.2857 | G |
| 6 | BICF2P169102           | 52153060 | 0 | 0   | 0      | G |
| 6 | BICF2G630577064        | 52170536 | G | 0   | 0      | A |
| 6 | BICF2P172903           | 52181169 | A | 0   | 0      | G |
| 6 | TIGRP2P84644_rs9233592 | 52197273 | C | 0   | 0      | G |
| 6 | BICF2P1069575          | 52200607 | G | 0   | 0      | A |
| 6 | BICF2G630577042        | 52214935 | A | 0   | 0      | G |
| 6 | BICF2P984524           | 52223776 | A | 0.5 | 0.7143 | G |
| 6 | BICF2G630577029        | 52234977 | C | 0   | 0      | A |
| 6 | TIGRP2P84654_rs8720084 | 52252347 | 0 | 0   | 0      | A |
| 6 | BICF2G630577009        | 52265062 | A | 0.5 | 0.7143 | G |
| 6 | BICF2G630576972        | 52278619 | A | 0.5 | 0.75   | G |
| 6 | BICF2P338483           | 52288436 | A | 0.5 | 0.2857 | T |
| 6 | BICF2P338482           | 52288657 | A | 0.5 | 0.2857 | G |
| 6 | BICF2G630576960        | 52291159 | A | 0.5 | 0.2857 | C |
| 6 | BICF2G630576946        | 52306084 | A | 0.5 | 0.7143 | G |
| 6 | BICF2G630576920        | 52321768 | G | 0   | 0      | A |
| 6 | BICF2G630576908        | 52333535 | A | 0.5 | 0.2857 | C |
| 6 | BICF2G630576895        | 52337365 | A | 0.5 | 0.2857 | G |
| 6 | BICF2G630576890        | 52350556 | G | 0.5 | 0.7143 | A |
| 6 | BICF2P1212653          | 52369165 | A | 0   | 0      | G |
| 6 | BICF2G630576854        | 52382417 | A | 0   | 0      | G |
| 6 | BICF2G630576850        | 52383371 | A | 0   | 0      | G |
| 6 | BICF2G630576844        | 52396050 | G | 0.5 | 0.2857 | A |
| 6 | BICF2G630576833        | 52410661 | C | 0.5 | 0.7143 | A |

|   |                        |          |   |     |        |   |
|---|------------------------|----------|---|-----|--------|---|
| 6 | BICF2S23617567         | 52422833 | A | 0   | 0      | G |
| 6 | BICF2G630576824        | 52432892 | A | 0.5 | 0.7143 | G |
| 6 | BICF2P295337           | 52442125 | A | 0.5 | 0.7143 | G |
| 6 | BICF2P1362974          | 52453299 | A | 0   | 0      | G |
| 6 | BICF2P1433834          | 52469228 | A | 1   | 1      | G |
| 6 | TIGRP2P84701_rs8643101 | 52485199 | A | 0.5 | 0.2857 | C |
| 6 | TIGRP2P84705_rs8643106 | 52486320 | G | 0   | 0      | A |
| 6 | BICF2P474535           | 52506822 | G | 1   | 1      | A |
| 6 | BICF2S23545979         | 52512733 | A | 0.5 | 0.2857 | G |
| 6 | BICF2P1105809          | 52524835 | A | 0.5 | 0.7143 | G |
| 6 | BICF2G630576803        | 52535518 | G | 1   | 1      | A |
| 6 | BICF2G630576794        | 52544158 | A | 1   | 1      | G |
| 6 | BICF2P160418           | 52562775 | A | 0   | 0      | G |
| 6 | BICF2G630576791        | 52567747 | G | 1   | 1      | A |
| 6 | BICF2P531913           | 52580054 | A | 0   | 0      | C |
| 6 | BICF2P214621           | 52604442 | A | 0   | 0      | C |
| 6 | BICF2P94943            | 52612624 | A | 0   | 0      | G |
| 6 | BICF2S23655797         | 52627655 | 0 | 0   | 0      | G |
| 6 | BICF2P1283940          | 52638182 | 0 | 0   | 0      | G |
| 6 | BICF2P1118095          | 52656749 | G | 0.5 | 0.7143 | A |
| 6 | BICF2P177398           | 52663707 | A | 0.5 | 0.2857 | G |
| 6 | BICF2P1305621          | 52674840 | A | 0.5 | 0.7143 | C |
| 6 | BICF2S22941240         | 52684600 | G | 0   | 0      | A |
| 6 | BICF2P257719           | 52698333 | A | 0.5 | 0.7143 | T |
| 6 | BICF2P1361899          | 52715583 | A | 0.5 | 0.7143 | G |
| 6 | TIGRP2P84731_rs8605032 | 52727454 | A | 0   | 0      | G |
| 6 | BICF2G630576778        | 52729788 | A | 0.5 | 0.2857 | G |
| 6 | TIGRP2P84739_rs8779684 | 52742175 | A | 0.5 | 0.7143 | G |
| 6 | BICF2G630576747        | 52750631 | G | 0.5 | 0.2857 | A |
| 6 | BICF2G630576738        | 52769768 | A | 0.5 | 0.2857 | G |
| 6 | BICF2G630576734        | 52779610 | G | 0.5 | 0.2857 | A |
| 6 | BICF2G630576731        | 52788515 | G | 0.5 | 0.2857 | A |
| 6 | BICF2G630576721        | 52799638 | A | 1   | 1      | G |
| 6 | BICF2G630576706        | 52813844 | C | 0.5 | 0.2857 | A |
| 6 | BICF2G630576688        | 52834998 | A | 0.5 | 0.2857 | G |
| 6 | BICF2G630576682        | 52836996 | G | 1   | 1      | A |
| 6 | BICF2G630576674        | 52842531 | G | 1   | 1      | A |
| 6 | BICF2G630576647        | 52863566 | C | 1   | 1      | A |
| 6 | BICF2G630576629        | 52871312 | C | 1   | 1      | G |
| 6 | BICF2G630576606        | 52883209 | A | 0   | 0      | G |
| 6 | BICF2G630576596        | 52888783 | G | 0.5 | 0.2857 | A |
| 6 | BICF2G630576578        | 52907341 | G | 0.5 | 0.2857 | A |
| 6 | BICF2G630576559        | 52912200 | G | 1   | 1      | A |
| 6 | BICF2G630576537        | 52932940 | A | 1   | 1      | G |
| 6 | BICF2G630576528        | 52938469 | A | 0.5 | 0.2857 | G |
| 6 | BICF2G630576487        | 52964535 | G | 1   | 1      | A |
| 6 | BICF2G630576482        | 52968371 | C | 0.5 | 0.2857 | G |

|   |                        |          |   |     |        |   |
|---|------------------------|----------|---|-----|--------|---|
| 6 | BICF2G630576480        | 52969027 | A | 0.5 | 0.2857 | G |
| 6 | BICF2G630576452        | 52988169 | C | 1   | 1      | A |
| 6 | BICF2G630576438        | 53006326 | G | 1   | 1      | A |
| 6 | BICF2G630576435        | 53015071 | G | 0.5 | 0.2857 | A |
| 6 | BICF2G630576425        | 53026592 | A | 0   | 0      | G |
| 6 | BICF2G630576409        | 53042303 | A | 0.5 | 0.7143 | G |
| 6 | BICF2P333587           | 53057385 | G | 0   | 0      | A |
| 6 | BICF2P1393573          | 53067409 | A | 0   | 0      | T |
| 6 | TIGRP2P84804_rs8990326 | 53081128 | A | 0   | 0      | G |
| 6 | BICF2G630576400        | 53087342 | G | 1   | 1      | A |
| 6 | BICF2G630576390        | 53095593 | A | 1   | 1      | G |
| 6 | BICF2P809532           | 53118464 | A | 0   | 0      | G |
| 6 | BICF2G630576380        | 53124600 | G | 1   | 1      | A |
| 6 | BICF2G630576375        | 53131323 | A | 0   | 0      | C |
| 6 | BICF2G630576361        | 53142559 | G | 1   | 1      | A |
| 6 | BICF2G630576356        | 53153148 | G | 1   | 1      | A |
| 6 | BICF2P1045560          | 53169373 | G | 0   | 0      | A |
| 6 | BICF2G630576339        | 53187184 | G | 0   | 0      | C |
| 6 | BICF2G630576336        | 53188634 | A | 1   | 1      | G |
| 6 | BICF2G630576274        | 53215078 | G | 0   | 0      | A |
| 6 | BICF2G630576250        | 53226445 | G | 1   | 1      | A |
| 6 | BICF2G630576239        | 53237859 | A | 0.5 | 0.2857 | G |
| 6 | BICF2G630576224        | 53245032 | A | 0.5 | 0.2857 | G |
| 6 | BICF2S23740454         | 53259195 | G | 0   | 0      | A |
| 6 | BICF2P3211             | 53268101 | G | 0   | 0      | A |
| 6 | BICF2G630576208        | 53290680 | A | 0   | 0      | G |
| 6 | BICF2G630576204        | 53292047 | A | 0   | 0      | G |
| 6 | BICF2G630576167        | 53307932 | G | 0   | 0      | A |
| 6 | TIGRP2P84845_rs8982082 | 53314754 | A | 0   | 0      | G |
| 6 | BICF2G630576137        | 53329036 | A | 0   | 0      | G |
| 6 | BICF2S22947179         | 53346387 | G | 1   | 1      | A |
| 6 | BICF2G630576100        | 53356635 | G | 1   | 1      | A |
| 6 | BICF2S23633861         | 53360612 | G | 1   | 1      | A |
| 6 | BICF2G630576083        | 53380948 | G | 1   | 1      | A |
| 6 | TIGRP2P84861_rs8945793 | 53386080 | G | 1   | 1      | A |
| 6 | BICF2S23761939         | 53396218 | A | 0   | 0      | G |
| 6 | TIGRP2P84878_rs9003572 | 53409520 | G | 0.5 | 0.7143 | A |
| 6 | BICF2S23356748         | 53419205 | G | 0.5 | 0.2857 | A |
| 6 | BICF2G630575998        | 53430748 | G | 0   | 0      | A |
| 6 | BICF2P258438           | 53442836 | A | 1   | 1      | G |
| 6 | BICF2P521021           | 53452628 | A | 1   | 1      | G |
| 6 | BICF2G630575948        | 53473666 | A | 1   | 1      | G |
| 6 | BICF2S23631820         | 53475767 | A | 0   | 0      | G |
| 6 | BICF2P485450           | 53488517 | A | 0   | 0      | G |
| 6 | BICF2P322981           | 53495082 | A | 1   | 1      | G |
| 6 | BICF2P168632           | 53522814 | 0 | 0   | 0      | A |
| 6 | BICF2G630575895        | 53551549 | C | 0.5 | 0.7143 | A |



|   |                        |          |   |     |        |   |
|---|------------------------|----------|---|-----|--------|---|
| 6 | BICF2G630575885        | 53555592 | A | NA  | 0.75   | G |
| 6 | BICF2S23532171         | 53569235 | A | 1   | 1      | G |
| 6 | TIGRP2P84896_rs8915620 | 53587281 | G | 0   | 0      | A |
| 6 | BICF2P1281162          | 53595416 | A | 0   | 0      | G |
| 6 | BICF2G630575831        | 53619501 | A | 0.5 | 0.7143 | G |
| 6 | BICF2P817950           | 53635521 | A | 0   | 0      | G |
| 6 | BICF2P1203942          | 53639316 | 0 | 0   | 0      | A |
| 6 | BICF2G630575826        | 53652880 | A | 0.5 | 0.7143 | G |
| 6 | BICF2G630575818        | 53659642 | G | 0.5 | 0.7143 | A |
| 6 | BICF2G630575763        | 53673448 | A | 0   | 0      | G |
| 6 | BICF2G630575750        | 53682675 | G | 0.5 | 0.75   | A |
| 6 | BICF2P185914           | 53695964 | C | 0.5 | 0.7143 | A |
| 6 | BICF2S2304082          | 53714602 | C | 0   | 0      | A |
| 6 | TIGRP2P84935_rs8965902 | 53723110 | G | 0   | 0      | A |
| 6 | BICF2G630575734        | 53741377 | G | 0.5 | 0.2857 | A |
| 6 | BICF2P953913           | 53757867 | 0 | 0   | 0      | A |
| 6 | BICF2S2308             | 53766240 | A | 0   | 0      | G |
| 6 | BICF2G630575725        | 53781339 | A | 0   | 0      | G |
| 6 | BICF2G630575716        | 53785752 | G | 1   | 1      | A |
| 6 | TIGRP2P84946_rs9024454 | 53801929 | A | 0   | 0      | G |
| 6 | BICF2G630575691        | 53810433 | G | 0   | 0      | A |
| 6 | BICF2G630575673        | 53826692 | 0 | 0   | 0      | A |
| 6 | BICF2G630575665        | 53833910 | C | 0   | 0      | A |
| 6 | BICF2P213833           | 53843186 | A | 0.5 | 0.2857 | G |
| 6 | BICF2P1060954          | 53856926 | 0 | 0   | 0      | A |
| 6 | BICF2P563608           | 53871123 | 0 | 0   | 0      | C |
| 6 | BICF2P1236966          | 53880125 | A | 0   | 0      | G |
| 6 | BICF2P28105            | 53900332 | A | 0   | 0      | G |
| 6 | BICF2P158215           | 53912628 | A | 0   | 0      | G |
| 6 | TIGRP2P84968_rs8957998 | 53938830 | A | 0   | 0      | G |
| 6 | BICF2P1398108          | 53950551 | A | 0.5 | 0.2857 | T |
| 6 | BICF2P993965           | 53969460 | 0 | 0   | 0      | G |
| 6 | BICF2P619396           | 53971627 | 0 | 0   | 0      | A |
| 6 | BICF2G630575652        | 54009463 | C | 0   | 0      | A |
| 6 | TIGRP2P84984_rs8839568 | 54016561 | A | 0   | 0      | G |
| 6 | BICF2G630575651        | 54032967 | A | 1   | 1      | G |
| 6 | BICF2G630575634        | 54040428 | A | 0   | 0      | C |
| 6 | BICF2G630575598        | 54059876 | G | 0.5 | 0.7143 | A |
| 6 | BICF2G630575571        | 54067177 | A | 0   | 0      | G |
| 6 | BICF2G630575558        | 54074477 | G | 1   | 1      | A |
| 6 | BICF2G630575548        | 54088717 | G | 0   | 0      | A |
| 6 | BICF2G630575533        | 54103440 | A | 0   | 0      | G |
| 6 | BICF2P1341132          | 54115107 | A | 1   | 1      | G |
| 6 | BICF2P728719           | 54123337 | G | 1   | 1      | A |
| 6 | BICF2P997808           | 54128126 | A | 0.5 | 0.7143 | G |
| 6 | BICF2P712807           | 54141175 | A | 1   | 1      | G |
| 6 | BICF2P685260           | 54144247 | A | 0   | 0      | G |

|   |                        |          |   |     |        |   |
|---|------------------------|----------|---|-----|--------|---|
| 6 | BICF2G630575510        | 54153757 | A | 0   | 0      | G |
| 6 | BICF2G630575509        | 54169758 | G | 0.5 | 0.7143 | A |
| 6 | TIGRP2P85003_rs8720203 | 54179149 | A | 0   | 0      | G |
| 6 | BICF2P225397           | 54194351 | G | 0.5 | 0.7143 | A |
| 6 | BICF2P448519           | 54200648 | A | 0.5 | 0.7143 | G |
| 6 | BICF2G630575494        | 54211643 | A | 0.5 | 0.7143 | G |
| 6 | TIGRP2P85008_rs8734033 | 54228680 | 0 | 0   | 0      | G |
| 6 | BICF2G630575466        | 54240588 | A | 1   | 1      | G |
| 6 | BICF2G630575461        | 54246881 | G | 1   | 1      | A |
| 6 | BICF2P980696           | 54261072 | A | 0.5 | 0.2857 | C |
| 6 | BICF2G630575435        | 54269117 | G | 0   | 0      | A |
| 6 | BICF2P999922           | 54290005 | A | 0.5 | 0.7143 | G |
| 6 | BICF2G630575421        | 54299172 | A | 0   | 0      | G |
| 6 | BICF2G630575416        | 54303398 | A | 0   | 0      | G |
| 6 | BICF2G630575405        | 54320911 | G | 0   | 0      | A |
| 6 | BICF2G630575388        | 54336831 | A | 0   | 0      | G |
| 6 | BICF2G630575382        | 54339284 | A | 0   | 0      | G |
| 6 | BICF2G630575374        | 54350507 | C | 0   | 0      | A |
| 6 | BICF2G630575360        | 54363496 | A | 0   | 0      | C |
| 6 | BICF2G630575355        | 54378284 | A | 0   | 0      | G |
| 6 | TIGRP2P85020_rs9160626 | 54383769 | C | 0   | 0      | A |
| 6 | BICF2G630575346        | 54396558 | A | 0.5 | 0.2857 | C |
| 6 | BICF2G630575322        | 54416685 | A | 0   | 0      | G |
| 6 | BICF2G630575313        | 54418627 | G | 0   | 0      | A |
| 6 | BICF2P976137           | 54438203 | 0 | 0   | 0      | A |
| 6 | BICF2P590161           | 54444573 | 0 | 0   | 0      | A |
| 6 | BICF2P288146           | 54459443 | A | 0   | 0      | G |
| 6 | BICF2P1236294          | 54464700 | C | 0.5 | 0.7143 | A |
| 6 | TIGRP2P85044_rs8870141 | 54479316 | C | 0   | 0      | A |
| 6 | BICF2P384039           | 54498064 | A | 0.5 | 0.2857 | G |
| 6 | BICF2G630575302        | 54512560 | A | 0.5 | 0.7143 | G |
| 6 | BICF2G630575297        | 54532293 | A | 0.5 | 0.7143 | G |
| 6 | BICF2G630575290        | 54537447 | A | 0.5 | 0.2857 | C |
| 6 | BICF2P132138           | 54544933 | A | 0   | 0      | T |
| 6 | BICF2G630575261        | 54564052 | A | 1   | 1      | G |
| 6 | BICF2P137010           | 54574117 | A | 0   | 0      | C |
| 6 | TIGRP2P85082_rs8784431 | 54588388 | 0 | 0   | 0      | C |
| 6 | BICF2P771101           | 54617654 | A | 0   | 0      | G |
| 6 | BICF2P533226           | 54627247 | A | 0   | 0      | G |
| 6 | TIGRP2P85087_rs8712094 | 54646441 | A | 0   | 0      | G |
| 6 | BICF2P679664           | 54649761 | A | 1   | 1      | C |
| 6 | BICF2P745019           | 54666768 | 0 | 0   | 0      | A |
| 6 | BICF2P957550           | 54682442 | A | 0   | 0      | G |
| 6 | TIGRP2P85091_rs8812117 | 54683066 | A | 0   | 0      | G |
| 6 | BICF2G630575249        | 54701809 | G | 1   | 1      | A |
| 6 | BICF2G630575244        | 54710685 | A | 1   | 1      | G |
| 6 | BICF2G630575234        | 54723409 | A | 0   | 0      | C |

|   |                        |          |   |     |        |   |
|---|------------------------|----------|---|-----|--------|---|
| 6 | BICF2P87065            | 54728586 | A | 0   | 0      | C |
| 6 | BICF2P422116           | 54746916 | 0 | 0   | 0      | A |
| 6 | BICF2G630575217        | 54751912 | A | 1   | 1      | G |
| 6 | BICF2P280561           | 54767902 | 0 | 0   | 0      | A |
| 6 | BICF2G630575201        | 54793685 | A | 0   | 0      | G |
| 6 | BICF2G630575189        | 54802519 | A | 0   | 0      | G |
| 6 | BICF2G630575175        | 54811746 | A | 0   | 0      | G |
| 6 | BICF2G630575152        | 54827758 | G | 0   | 0      | A |
| 6 | BICF2G630575146        | 54832958 | A | 0   | 0      | G |
| 6 | BICF2G630575115        | 54851466 | C | 0   | 0      | A |
| 6 | BICF2P272395           | 54865227 | A | 0   | 0      | G |
| 6 | BICF2G630575090        | 54871210 | G | 0   | 0      | A |
| 6 | BICF2G630575086        | 54879083 | A | 0   | 0      | C |
| 6 | BICF2G630575080        | 54889824 | A | 0.5 | 0.7143 | G |
| 6 | BICF2P1418227          | 54904130 | A | 0   | 0      | C |
| 6 | BICF2G630575060        | 54914460 | C | 0   | 0      | A |
| 6 | BICF2P1010202          | 54929494 | 0 | 0   | 0      | C |
| 6 | BICF2G630575042        | 54938312 | A | 0   | 0      | C |
| 6 | TIGRP2P85128_rs8589584 | 54957208 | 0 | 0   | 0      | T |
| 6 | TIGRP2P85129_rs8817889 | 54971598 | A | 0   | 0      | G |
| 6 | BICF2G630575018        | 54982002 | G | 0   | 0      | A |
| 6 | BICF2P236916           | 54994521 | A | 0   | 0      | G |
| 6 | BICF2G630575002        | 55005755 | A | 0   | 0      | G |
| 6 | BICF2G630574993        | 55018815 | G | 0   | 0      | A |
| 6 | BICF2G630574973        | 55028670 | A | 0   | 0      | G |
| 6 | BICF2S23515514         | 55039162 | A | 0   | 0      | G |
| 6 | BICF2P542195           | 55079121 | 0 | 0   | 0      | A |
| 6 | BICF2G630574952        | 55103756 | A | 0   | 0      | T |
| 6 | BICF2P322771           | 55112332 | 0 | 0   | 0      | T |
| 6 | G413f42S82             | 55134151 | 0 | 0   | 0      | C |
| 6 | BICF2P939849           | 55173659 | 0 | 0   | 0      | A |
| 6 | BICF2S23254257         | 55182253 | A | 0   | 0      | G |
| 6 | BICF2S22922889         | 55196403 | G | 0   | 0      | A |
| 6 | BICF2G630574943        | 55221744 | A | 0   | 0      | G |
| 6 | BICF2G630574937        | 55232911 | C | 0   | 0      | A |
| 6 | BICF2G630574935        | 55236200 | G | 0   | 0      | A |
| 6 | BICF2G630574922        | 55250029 | G | 0   | 0      | A |
| 6 | BICF2G630574909        | 55279462 | A | 0   | 0      | C |
| 6 | BICF2P1008248          | 55291810 | A | 0   | 0      | C |
| 6 | BICF2P758431           | 55293811 | A | 0   | 0      | G |
| 6 | BICF2G630574908        | 55313825 | A | 0   | 0      | G |
| 6 | BICF2P1443533          | 55315034 | G | 1   | 1      | A |
| 6 | BICF2G630574877        | 55337334 | G | 0   | 0      | A |
| 6 | BICF2G630574876        | 55338097 | T | 0.5 | 0.7143 | A |
| 6 | BICF2G630574874        | 55353633 | T | 0   | 0      | A |
| 6 | BICF2G630574863        | 55356446 | A | 0   | 0      | C |
| 6 | BICF2G630574854        | 55363874 | G | 0.5 | 0.7143 | A |

|   |                        |          |   |     |        |   |
|---|------------------------|----------|---|-----|--------|---|
| 6 | BICF2P624673           | 55382150 | G | 0.5 | 0.7143 | A |
| 6 | BICF2G630574814        | 55385318 | A | 0.5 | 0.7143 | G |
| 6 | BICF2P1111663          | 55397546 | G | 0   | 0      | A |
| 6 | BICF2S23626208         | 55409481 | A | 0   | 0      | C |
| 6 | BICF2G630574752        | 55427500 | A | 1   | 1      | G |
| 6 | BICF2S23228667         | 55434996 | A | 1   | 1      | G |
| 6 | BICF2P1157839          | 55452633 | G | 1   | 1      | A |
| 6 | BICF2P690499           | 55457069 | C | 1   | 1      | A |
| 6 | BICF2P607619           | 55473160 | A | 0.5 | 0.7143 | G |
| 6 | BICF2P1082679          | 55477370 | A | 0.5 | 0.7143 | G |
| 6 | BICF2P1191886          | 55489558 | C | 0.5 | 0.7143 | A |
| 6 | BICF2S2291434          | 55500889 | G | 0   | 0      | A |
| 6 | TIGRP2P85174_rs9244598 | 55517258 | 0 | 0   | 0      | C |
| 6 | BICF2P212991           | 55527616 | A | 0   | 0      | T |
| 6 | BICF2G630574745        | 55542797 | A | 0   | 0      | G |
| 6 | BICF2P1115353          | 55552187 | A | 0   | 0      | G |
| 6 | BICF2G630574727        | 55565015 | A | 0   | 0      | G |
| 6 | BICF2S23015141         | 55577939 | G | 0.5 | 0.7143 | A |
| 6 | BICF2G630574708        | 55589989 | G | 0.5 | 0.7143 | A |
| 6 | BICF2P1386020          | 55598410 | A | 1   | 1      | G |
| 6 | BICF2G630574678        | 55613641 | A | 0.5 | 0.75   | G |
| 6 | BICF2P1092588          | 55633527 | 0 | 0   | 0      | G |
| 6 | BICF2G630574642        | 55636021 | A | 0.5 | 0.2857 | G |
| 6 | TIGRP2P85192_rs9148232 | 55643936 | C | 0.5 | 0.7143 | A |
| 6 | BICF2P1255555          | 55650356 | A | 0   | 0      | G |
| 6 | TIGRP2P85205_rs8914001 | 55668171 | 0 | 0   | 0      | A |
| 6 | TIGRP2P85213_rs8938443 | 55699707 | A | 0.5 | 0.2857 | G |
| 6 | BICF2P522202           | 55723944 | A | 0.5 | 0.7143 | G |
| 6 | TIGRP2P85225_rs8900931 | 55730091 | G | 1   | 1      | A |
| 6 | BICF2P234021           | 55745992 | G | 0.5 | 0.2857 | A |
| 6 | TIGRP2P85240_rs8660915 | 55777039 | G | 0   | 0      | A |
| 6 | BICF2P923347           | 55786872 | T | 0.5 | 0.7143 | A |
| 6 | BICF2G630574594        | 55809462 | A | 0.5 | 0.2857 | C |
| 6 | BICF2P519999           | 55812384 | A | 0   | 0      | C |
| 6 | BICF2G630574566        | 55852790 | C | 0.5 | 0.25   | A |
| 6 | BICF2G630574564        | 55857577 | G | 0.5 | 0.2857 | A |
| 6 | BICF2G630574548        | 55871605 | A | 0.5 | 0.2857 | G |
| 6 | BICF2G630574534        | 55888682 | C | 0.5 | 0.2857 | A |
| 6 | BICF2G630574507        | 55902838 | G | 0.5 | 0.2857 | A |
| 6 | BICF2G630574491        | 55916759 | A | 0   | 0      | G |
| 6 | BICF2G630574489        | 55928341 | A | 0   | 0      | G |
| 6 | BICF2G630574479        | 55954062 | A | 0   | 0      | T |
| 6 | BICF2G630574474        | 55962485 | G | 0   | 0      | C |
| 6 | BICF2G630574470        | 55975606 | A | 0   | 0      | G |
| 6 | BICF2G630574461        | 55983246 | C | 0   | 0      | A |
| 6 | BICF2G630574440        | 56000700 | A | 0   | 0      | G |
| 6 | BICF2G630574433        | 56010479 | A | 0.5 | 0.2857 | T |

|   |                        |          |   |     |        |   |
|---|------------------------|----------|---|-----|--------|---|
| 6 | BICF2G630574428        | 56017035 | A | 0.5 | 0.7143 | G |
| 6 | BICF2G630574423        | 56032300 | G | 0.5 | 0.7143 | A |
| 6 | BICF2G630574397        | 56048972 | A | 0.5 | 0.7143 | T |
| 6 | BICF2G630574384        | 56053913 | G | 0.5 | 0.7143 | A |
| 6 | BICF2G630574380        | 56056909 | A | 0.5 | 0.7143 | G |
| 6 | BICF2P313760           | 56057444 | A | 0.5 | 0.7143 | T |
| 6 | BICF2P1140625          | 56067499 | G | 0   | 0      | A |
| 6 | BICF2P192717           | 56074671 | A | 0.5 | 0.7143 | G |
| 6 | BICF2P646132           | 56092182 | G | 0.5 | 0.2857 | A |
| 6 | BICF2P953174           | 56107661 | A | 0.5 | 0.7143 | G |
| 6 | BICF2P158918           | 56109611 | A | 0.5 | 0.7143 | G |
| 6 | BICF2G630574369        | 56122225 | T | 0   | 0      | A |
| 6 | BICF2S23415199         | 56131701 | A | 1   | 1      | C |
| 6 | BICF2G630574344        | 56145050 | A | 0   | 0      | G |
| 6 | BICF2G630574307        | 56162235 | 0 | 0   | 0      | G |
| 6 | BICF2G630574290        | 56179031 | A | 0   | 0      | G |
| 6 | BICF2G630574286        | 56192138 | G | 0   | 0      | A |
| 6 | BICF2P656619           | 56203277 | G | 0   | 0      | C |
| 6 | BICF2G630574261        | 56204725 | G | 1   | 1      | A |
| 6 | BICF2P1419328          | 56232453 | 0 | 0   | 0      | G |
| 6 | BICF2P1419332          | 56236944 | G | 1   | 1      | A |
| 6 | BICF2P802024           | 56255940 | 0 | 0   | 0      | C |
| 6 | TIGRP2P85291_rs8769420 | 56262742 | G | 0   | 0      | A |
| 6 | BICF2P1265796          | 56283857 | 0 | 0   | 0      | A |
| 6 | BICF2G630574249        | 56298955 | A | 0.5 | 0.6429 | G |
| 6 | BICF2G630574248        | 56332565 | G | 0.5 | 0.6429 | A |
| 6 | BICF2P971133           | 56345181 | 0 | 0   | 0      | C |
| 6 | BICF2S23915215         | 56354196 | G | 0   | 0      | A |
| 6 | G414f37S66             | 56365129 | A | 0   | 0      | G |
| 6 | BICF2G630574244        | 56436623 | A | 0.5 | 0.6429 | T |
| 6 | TIGRP2P85296_rs9120172 | 56444728 | 0 | 0   | 0      | G |
| 6 | BICF2P591648           | 56461097 | 0 | 0   | 0      | A |
| 6 | BICF2S23541004         | 56469738 | G | 0   | 0      | A |
| 6 | BICF2P220988           | 56485612 | 0 | 0   | 0      | A |
| 6 | BICF2P642404           | 56503560 | 0 | 0   | 0      | C |
| 6 | BICF2S24415326         | 56543687 | G | 0   | 0      | A |
| 6 | BICF2P594730           | 56550178 | A | 0   | 0      | G |
| 6 | BICF2P275345           | 56569500 | 0 | 0   | 0      | A |
| 6 | BICF2G630574239        | 56580688 | A | 0   | 0      | G |
| 6 | BICF2G630574203        | 56633566 | G | 0   | 0      | A |
| 6 | BICF2G630574198        | 56639262 | A | 0   | 0      | C |
| 6 | BICF2G630574174        | 56654485 | G | 0   | 0      | A |
| 6 | BICF2G630574168        | 56657763 | G | 0   | 0      | A |
| 6 | BICF2G630574165        | 56663610 | 0 | 0   | 0      | G |
| 6 | BICF2G630574150        | 56677257 | A | 0.5 | 0.3571 | G |
| 6 | BICF2G630574131        | 56694352 | G | 0.5 | 0.3571 | A |
| 6 | BICF2G630574125        | 56695716 | G | 0.5 | 0.3571 | A |

|   |                        |          |   |     |        |   |
|---|------------------------|----------|---|-----|--------|---|
| 6 | TIGRP2P85870_rs9185886 | 56707545 | A | 0   | 0      | G |
| 6 | BICF2G630574088        | 56726581 | G | 0.5 | 0.3571 | A |
| 6 | BICF2S23553878         | 56737854 | G | 0.5 | 0.3571 | A |
| 6 | BICF2G630574084        | 56743490 | G | 0   | 0      | A |
| 6 | BICF2G630574065        | 56753117 | G | 1   | 1      | A |
| 6 | BICF2G630574044        | 56760633 | C | 1   | 1      | A |
| 6 | BICF2G630574028        | 56765180 | A | 0   | 0      | G |
| 6 | TIGRP2P85873_rs8575950 | 56782883 | 0 | 0   | 0      | G |
| 6 | BICF2G630574004        | 56791784 | G | 1   | 1      | A |
| 6 | BICF2P614196           | 56804635 | T | 0   | 0      | A |
| 6 | BICF2P368863           | 56824106 | 0 | 0   | 0      | A |
| 6 | BICF2G630573990        | 56838366 | A | 0   | 0      | G |
| 6 | BICF2G630573971        | 56850108 | A | 0   | 0      | G |
| 6 | BICF2G630573969        | 56852412 | G | 0   | 0      | C |
| 6 | TIGRP2P85877_rs8918211 | 56860680 | A | 0   | 0      | G |
| 6 | BICF2G630573959        | 56872329 | A | 0.5 | 0.3571 | G |
| 6 | BICF2G630573950        | 56888658 | A | 0.5 | 0.6429 | G |
| 6 | BICF2G630573949        | 56898474 | C | 0.5 | 0.6429 | A |
| 6 | TIGRP2P85893_rs9127426 | 56910237 | A | 0.5 | 0.6429 | G |
| 6 | BICF2P745160           | 56922496 | T | 0   | 0      | A |
| 6 | BICF2G630573904        | 56932623 | G | 0.5 | 0.6429 | A |
| 6 | BICF2P256315           | 56945605 | A | 0.5 | 0.6429 | G |
| 6 | BICF2G630573896        | 56950095 | A | 0.5 | 0.6429 | G |
| 6 | BICF2G630573889        | 56962171 | 0 | 0   | 0      | G |
| 6 | BICF2G630573884        | 56973871 | A | 0   | 0      | G |
| 6 | BICF2G630573877        | 56983267 | G | 0   | 0      | A |
| 6 | BICF2G630573857        | 56997177 | A | 0.5 | 0.3571 | C |
| 6 | BICF2G630573839        | 57007124 | A | 0   | 0      | G |
| 6 | BICF2G630573831        | 57020866 | A | 0   | 0      | G |
| 6 | BICF2G630573820        | 57030941 | G | 0.5 | 0.6429 | A |
| 6 | BICF2G630573810        | 57040448 | A | 0   | 0      | G |
| 6 | BICF2G630573794        | 57051634 | A | 0   | 0      | G |
| 6 | BICF2G630573776        | 57064271 | A | 0   | 0      | G |
| 6 | BICF2G630573758        | 57084501 | G | 0   | 0      | A |
| 6 | BICF2G630573757        | 57091190 | C | 0   | 0      | G |
| 6 | BICF2S23642046         | 57112091 | 0 | 0   | 0      | G |
| 6 | BICF2G630573754        | 57126391 | A | 0   | 0      | G |
| 6 | BICF2G630573753        | 57133759 | A | 0   | 0      | G |
| 6 | BICF2P538358           | 57145776 | 0 | 0   | 0      | G |
| 6 | BICF2P927234           | 57169258 | 0 | 0   | 0      | A |
| 6 | BICF2S2368027          | 57184384 | A | 0   | 0      | G |
| 6 | BICF2G630573749        | 57210008 | A | 0   | 0      | G |
| 6 | BICF2G630573744        | 57222074 | A | 0   | 0      | G |
| 6 | BICF2G630573740        | 57230665 | G | 1   | 1      | A |
| 6 | BICF2G630573738        | 57246362 | A | 0   | 0      | G |
| 6 | BICF2G630573728        | 57258205 | C | 0.5 | 0.6429 | G |
| 6 | BICF2G630573723        | 57268740 | G | 0.5 | 0.6429 | A |

|   |                        |          |   |     |        |   |
|---|------------------------|----------|---|-----|--------|---|
| 6 | BICF2G630573709        | 57278526 | C | 0.5 | 0.6429 | A |
| 6 | BICF2P1180040          | 57291129 | A | 1   | 1      | G |
| 6 | BICF2G630573700        | 57298598 | A | 1   | 1      | G |
| 6 | BICF2G630573684        | 57306645 | A | 0   | 0      | G |
| 6 | BICF2S23651052         | 57316517 | C | 0   | 0      | G |
| 6 | BICF2G630573645        | 57338843 | A | 0   | 0      | G |
| 6 | BICF2S2348714          | 57362551 | A | 0   | 0      | G |
| 6 | BICF2G630573629        | 57382990 | G | 0   | 0      | A |
| 6 | BICF2G630573617        | 57389486 | G | 1   | 1      | A |
| 6 | BICF2P193228           | 57404810 | A | 1   | 1      | C |
| 6 | BICF2P1272860          | 57435775 | G | 0   | 0      | A |
| 6 | BICF2G630573575        | 57446498 | G | 0   | 0      | A |
| 6 | BICF2G630573566        | 57454370 | G | 0   | 0      | A |
| 6 | BICF2G630573562        | 57467248 | A | 0   | 0      | G |
| 6 | BICF2G630573560        | 57481119 | G | 0   | 0      | A |
| 6 | BICF2G630573552        | 57494104 | G | 0   | 0      | A |
| 6 | BICF2P56535            | 57503460 | G | 0   | 0      | C |
| 6 | BICF2P1200119          | 57512751 | A | 0   | 0      | G |
| 6 | BICF2G630573542        | 57530689 | A | 0   | 0      | G |
| 6 | BICF2G630573538        | 57537524 | A | 0.5 | 0.6429 | G |
| 6 | BICF2G630573533        | 57551414 | A | 0   | 0      | G |
| 6 | BICF2P34422            | 57558322 | A | 0   | 0      | C |
| 6 | BICF2P868015           | 57571069 | C | 0   | 0      | A |
| 6 | BICF2P770967           | 57590389 | 0 | 0   | 0      | G |
| 6 | BICF2P247119           | 57593661 | G | 1   | 1      | A |
| 6 | BICF2P690940           | 57609886 | G | 1   | 1      | A |
| 6 | BICF2G630573522        | 57627523 | G | 0   | 0      | A |
| 6 | TIGRP2P85973_rs8846515 | 57640734 | A | 1   | 1      | G |
| 6 | BICF2P83265            | 57653120 | A | 1   | 1      | G |
| 6 | BICF2P801872           | 57675371 | G | 1   | 1      | A |
| 6 | BICF2P20812            | 57684907 | A | 0   | 0      | G |
| 6 | BICF2P20813            | 57685249 | G | 1   | 1      | A |
| 6 | BICF2G630573477        | 57701679 | A | 0.5 | 0.3571 | G |
| 6 | BICF2G630573463        | 57708527 | A | 0.5 | 0.3571 | C |
| 6 | BICF2G630573424        | 57724276 | A | 0   | 0      | G |
| 6 | BICF2P837280           | 57740246 | A | 0.5 | 0.5714 | G |
| 6 | BICF2P463039           | 57748950 | A | 0.5 | 0.3571 | C |
| 6 | BICF2G630573391        | 57752163 | A | 0   | 0      | G |
| 6 | BICF2S23133221         | 57762072 | G | 0   | 0      | A |
| 6 | BICF2P1188965          | 57773441 | T | 0   | 0      | A |
| 6 | BICF2P515341           | 57784830 | A | 0   | 0      | G |
| 6 | BICF2S2365867          | 57790878 | G | 0   | 0      | A |
| 6 | BICF2G630573372        | 57807174 | G | 0   | 0      | A |
| 6 | BICF2G630573368        | 57819052 | A | 0   | 0      | G |
| 6 | BICF2G630573363        | 57823733 | G | 0   | 0      | A |
| 6 | BICF2S23029784         | 57840922 | A | 0   | 0      | G |
| 6 | BICF2G630573350        | 57847677 | C | 0   | 0      | A |

|   |                        |          |   |     |        |   |
|---|------------------------|----------|---|-----|--------|---|
| 6 | BICF2G630573326        | 57867687 | C | 0   | 0      | A |
| 6 | BICF2G630573324        | 57873430 | G | 0   | 0      | A |
| 6 | BICF2G630573316        | 57887044 | A | 0   | 0      | C |
| 6 | BICF2G630573311        | 57897701 | G | 0   | 0      | A |
| 6 | BICF2P975176           | 57903851 | A | 0   | 0      | G |
| 6 | BICF2P899876           | 57920387 | G | 1   | 1      | A |
| 6 | BICF2P824055           | 57929723 | G | 0   | 0      | A |
| 6 | BICF2P284466           | 57956309 | A | 0   | 0      | G |
| 6 | BICF2P1329725          | 57971066 | C | 0   | 0      | G |
| 6 | BICF2P1085552          | 57976673 | A | 0   | 0      | T |
| 6 | BICF2S2317296          | 57985909 | A | 0.5 | 0.3571 | G |
| 6 | BICF2S23554167         | 57996926 | A | 0   | 0      | C |
| 6 | BICF2P304575           | 58011790 | 0 | 0   | 0      | G |
| 6 | BICF2P1222628          | 58026349 | G | 0   | 0      | A |
| 6 | BICF2S23510808         | 58029352 | A | 1   | 1      | C |
| 6 | TIGRP2P86035_rs9122704 | 58036360 | C | 0   | 0      | A |
| 6 | BICF2P934538           | 58047930 | 0 | 0   | 0      | G |
| 6 | BICF2P1340532          | 58060674 | A | 0   | 0      | G |
| 6 | BICF2P847136           | 58063792 | G | 0   | 0      | A |
| 6 | BICF2P1314017          | 58083837 | A | 0   | 0      | G |
| 6 | BICF2P599008           | 58088670 | A | 1   | 1      | G |
| 6 | BICF2P789716           | 58101237 | A | 0.5 | 0.6429 | G |
| 6 | BICF2P537008           | 58115213 | G | 0.5 | 0.3571 | A |
| 6 | BICF2P173597           | 58122596 | A | 0   | 0      | G |
| 6 | BICF2S23350087         | 58126850 | A | 0.5 | 0.6429 | G |
| 6 | BICF2P837122           | 58130497 | A | 0.5 | 0.3571 | G |
| 6 | BICF2S23235113         | 58132824 | A | 0.5 | 0.6429 | G |
| 6 | BICF2P662490           | 58152040 | A | 0.5 | 0.6429 | G |
| 6 | BICF2P1331022          | 58163242 | G | 0   | 0      | A |
| 6 | BICF2P823948           | 58169389 | A | 0.5 | 0.6429 | G |
| 6 | BICF2P1361460          | 58181441 | A | 0.5 | 0.6429 | G |
| 6 | BICF2S23517261         | 58196269 | G | 1   | 1      | A |
| 6 | BICF2P1122539          | 58209614 | 0 | 0   | 0      | A |
| 6 | BICF2P719032           | 58216244 | A | 0.5 | 0.6429 | G |
| 6 | BICF2S23223752         | 58226933 | A | 0   | 0      | G |
| 6 | BICF2P260411           | 58241389 | 0 | 0   | 0      | A |
| 6 | BICF2P1268157          | 58271135 | 0 | 0   | 0      | A |
| 6 | TIGRP2P86110_rs8521712 | 58283801 | 0 | 0   | 0      | G |
| 6 | TIGRP2P86118_rs9084857 | 58297151 | A | 0.5 | 0.6429 | T |
| 6 | BICF2P871176           | 58310304 | 0 | 0   | 0      | A |
| 6 | BICF2P770362           | 58323865 | G | 0   | 0      | A |
| 6 | BICF2P927829           | 58334983 | 0 | 0   | 0      | A |
| 6 | BICF2P672184           | 58341917 | A | 0   | 0      | G |
| 6 | BICF2P393858           | 58358978 | A | 0   | 0      | C |
| 6 | BICF2P124875           | 58363908 | A | 0.5 | 0.6429 | G |
| 6 | BICF2S23213664         | 58381423 | A | 0.5 | 0.6429 | G |
| 6 | BICF2S23258530         | 58386025 | G | 0   | 0      | A |



|   |                        |          |   |     |        |   |
|---|------------------------|----------|---|-----|--------|---|
| 6 | BICF2S2373412          | 58405661 | C | 0.5 | 0.6429 | G |
| 6 | BICF2P1268516          | 58413227 | G | 0.5 | 0.6429 | A |
| 6 | BICF2S23213970         | 58426144 | A | 0   | 0      | G |
| 6 | BICF2P1369640          | 58449338 | 0 | 0   | 0      | G |
| 6 | BICF2P377907           | 58459048 | A | 0   | 0      | G |
| 6 | BICF2P773538           | 58472145 | A | 0.5 | 0.3571 | G |
| 6 | BICF2P511695           | 58478112 | A | 0.5 | 0.3571 | G |
| 6 | BICF2P546162           | 58503768 | G | 0   | 0      | A |
| 6 | BICF2S23445434         | 58521441 | A | 0   | 0      | T |
| 6 | TIGRP2P86140_rs8596660 | 58531504 | 0 | 0   | 0      | G |
| 6 | BICF2P1170341          | 58536872 | A | 0   | 0      | G |
| 6 | BICF2P1084824          | 58549240 | A | 1   | 1      | C |
| 6 | BICF2P1370106          | 58580737 | A | 0   | 0      | G |
| 6 | BICF2P871533           | 58584466 | G | 0   | 0      | A |
| 6 | TIGRP2P86167_rs9008476 | 58595017 | G | 0   | 0      | A |
| 6 | BICF2S23637190         | 58611040 | A | 0   | 0      | G |
| 6 | BICF2P642081           | 58617872 | A | 0   | 0      | G |
| 6 | BICF2P591015           | 58631844 | G | 0   | 0      | A |
| 6 | BICF2P1300551          | 58640213 | G | 0   | 0      | A |
| 6 | BICF2P508056           | 58672414 | G | 0   | 0      | A |
| 6 | BICF2P526435           | 58674874 | G | 0   | 0      | A |
| 6 | BICF2P1086196          | 58693745 | A | 0   | 0      | C |
| 6 | BICF2P177326           | 58704822 | G | 0   | 0      | A |
| 6 | BICF2P518132           | 58709236 | A | 0   | 0      | G |
| 6 | BICF2P65728            | 58725956 | G | 0   | 0      | A |
| 6 | BICF2P172163           | 58732162 | A | 0   | 0      | G |
| 6 | BICF2P813416           | 58742715 | G | 0   | 0      | A |
| 6 | TIGRP2P86222_rs8645966 | 58761704 | A | 0.5 | 0.3571 | G |
| 6 | TIGRP2P86223_rs8818592 | 58767307 | G | 0   | 0      | A |
| 6 | BICF2P1194083          | 58780475 | G | 0.5 | 0.3571 | A |
| 6 | BICF2P1266666          | 58791220 | G | 1   | 1      | A |
| 6 | BICF2P754049           | 58803116 | A | 0   | 0      | G |
| 6 | BICF2P61178            | 58819370 | A | 1   | 1      | T |
| 6 | TIGRP2P86240_rs9095226 | 58826541 | A | 0.5 | 0.6429 | C |
| 6 | BICF2S23330596         | 58838691 | A | 0.5 | 0.6429 | G |
| 6 | BICF2P214796           | 58848769 | A | 0.5 | 0.3571 | C |
| 6 | BICF2P376167           | 58866996 | C | 0.5 | 0.3571 | A |
| 6 | TIGRP2P86250_rs9047053 | 58871090 | C | 0   | 0      | A |
| 6 | BICF2P48903            | 58885168 | G | 0   | 0      | A |
| 6 | TIGRP2P86264_rs9246408 | 58901054 | A | 0   | 0      | G |
| 6 | BICF2P1401124          | 58914189 | A | 0   | 0      | G |
| 6 | TIGRP2P86271_rs9012980 | 58917384 | A | 1   | 1      | C |
| 6 | BICF2S23319798         | 58929188 | A | 1   | 1      | G |
| 6 | TIGRP2P86278_rs8945030 | 58942071 | G | 0   | 0      | A |
| 6 | BICF2P1310865          | 58953022 | C | 0   | 0      | A |
| 6 | BICF2P744427           | 58969117 | 0 | 0   | 0      | A |
| 6 | BICF2P192715           | 58972835 | G | 0   | 0      | A |

|   |                        |          |   |     |        |   |
|---|------------------------|----------|---|-----|--------|---|
| 6 | BICF2P579807           | 58989598 | G | 0   | 0      | A |
| 6 | BICF2S23331722         | 59002214 | G | 0.5 | 0.6429 | A |
| 6 | BICF2P1221000          | 59007338 | A | 0   | 0      | G |
| 6 | TIGRP2P86286_rs8639931 | 59019020 | 0 | 0   | 0      | G |
| 6 | BICF2P939016           | 59029995 | G | 0   | 0      | A |
| 6 | BICF2P713811           | 59044806 | G | 0   | 0      | A |
| 6 | BICF2P1258730          | 59054191 | A | 0.5 | 0.3571 | G |
| 6 | BICF2P672415           | 59065473 | A | 0   | 0      | G |
| 6 | BICF2S23756724         | 59079568 | C | 0.5 | 0.3571 | A |
| 6 | BICF2P11210            | 59087321 | A | 0.5 | 0.6429 | G |
| 6 | BICF2S23158944         | 59102502 | A | 0.5 | 0.6429 | G |
| 6 | BICF2P1379767          | 59112027 | A | 0.5 | 0.3571 | G |
| 6 | BICF2P1391612          | 59128268 | A | 0.5 | 0.3571 | T |
| 6 | BICF2P1286321          | 59139653 | G | 0.5 | 0.6429 | A |
| 6 | BICF2P721780           | 59154375 | 0 | 0   | 0      | A |
| 6 | BICF2S2359076          | 59165324 | A | 0.5 | 0.3571 | C |
| 6 | BICF2P168335           | 59197672 | 0 | 0   | 0      | G |
| 6 | BICF2S23261056         | 59216393 | G | 0   | 0      | A |
| 6 | BICF2P922768           | 59226065 | 0 | 0   | 0      | C |
| 6 | BICF2P137809           | 59244675 | 0 | 0   | 0      | C |
| 6 | BICF2P84609            | 59249778 | 0 | 0   | 0      | G |
| 6 | BICF2P609143           | 59267793 | 0 | 0   | 0      | A |
| 6 | BICF2S23751798         | 59275032 | C | 0   | 0      | A |
| 6 | BICF2P585026           | 59308231 | 0 | 0   | 0      | A |
| 6 | BICF2P417279           | 59319515 | 0 | 0   | 0      | C |
| 6 | BICF2P334341           | 59350744 | G | 0   | 0      | A |
| 6 | TIGRP2P86366_rs8605604 | 59356441 | G | 0   | 0      | A |
| 6 | BICF2P1118099          | 59366149 | A | 0   | 0      | G |
| 6 | BICF2P298720           | 59387874 | 0 | 0   | 0      | A |
| 6 | BICF2P483434           | 59404970 | A | 0   | 0      | G |
| 6 | BICF2P730258           | 59431234 | G | 0   | 0      | A |
| 6 | BICF2P1197340          | 59442277 | 0 | 0   | 0      | A |
| 6 | TIGRP2P86378_rs9164291 | 59447662 | A | 0   | 0      | C |
| 6 | TIGRP2P86382_rs9052357 | 59484502 | C | 0   | 0      | A |
| 6 | BICF2P1240689          | 59499400 | 0 | 0   | 0      | A |
| 6 | TIGRP2P86383_rs8648067 | 59501097 | A | 0   | 0      | G |
| 6 | BICF2S2376349          | 59521758 | C | 0   | 0      | A |
| 6 | TIGRP2P86386_rs9032889 | 59532190 | A | 0   | 0      | C |
| 6 | BICF2P1019125          | 59536928 | A | 0.5 | 0.3571 | G |
| 6 | BICF2P1374297          | 59548365 | T | 0.5 | 0.6429 | A |
| 6 | TIGRP2P86390_rs8560151 | 59548719 | A | 0.5 | 0.3571 | C |
| 6 | BICF2P440946           | 59569746 | A | 0.5 | 0.6429 | G |
| 6 | BICF2P1108129          | 59570889 | A | 0.5 | 0.3571 | C |
| 6 | BICF2P511211           | 59584315 | 0 | 0   | 0      | A |
| 6 | BICF2S2305741          | 59603696 | G | 0.5 | 0.6429 | A |
| 6 | TIGRP2P86404_rs9217482 | 59636945 | G | 0   | 0      | A |
| 6 | BICF2P786672           | 59639769 | A | 0.5 | 0.6429 | G |

|   |                        |          |   |     |        |   |
|---|------------------------|----------|---|-----|--------|---|
| 6 | BICF2P327146           | 59650775 | G | 0.5 | 0.6429 | A |
| 6 | BICF2P1091570          | 59662216 | A | 0.5 | 0.6429 | G |
| 6 | BICF2P177195           | 59685561 | G | 0   | 0      | A |
| 6 | BICF2P490581           | 59703980 | A | 0.5 | 0.6429 | G |
| 6 | BICF2P831572           | 59709288 | A | 0.5 | 0.6667 | G |
| 6 | BICF2P1309575          | 59726333 | A | 0.5 | 0.6429 | G |
| 6 | BICF2P901170           | 59738731 | A | 0.5 | 0.6429 | G |
| 6 | BICF2P1297650          | 59753081 | A | 0.5 | 0.6429 | G |
| 6 | BICF2P1297653          | 59755412 | A | 0.5 | 0.6429 | G |
| 6 | BICF2S2349350          | 59784116 | A | 0.5 | 0.3571 | G |
| 6 | BICF2P1064329          | 59811057 | G | 1   | 1      | A |
| 6 | BICF2P1242308          | 59821007 | A | 1   | 1      | G |
| 6 | TIGRP2P86438_rs8724929 | 59827980 | G | 1   | 1      | A |
| 6 | TIGRP2P86445_rs8717250 | 59844874 | G | 1   | 1      | A |
| 6 | BICF2P341635           | 59852319 | A | 1   | 1      | C |
| 6 | BICF2P590761           | 59857894 | A | 1   | 1      | G |
| 6 | BICF2P618381           | 59874141 | A | 1   | 1      | G |
| 6 | BICF2P1373482          | 59881266 | G | 0.5 | 0.6429 | A |
| 6 | TIGRP2P86460_rs9093877 | 59902692 | T | 1   | 1      | A |
| 6 | BICF2P165247           | 59917378 | G | 0   | 0      | A |
| 6 | BICF2P581390           | 59932352 | A | 1   | 1      | G |
| 6 | BICF2P1136612          | 59944539 | A | 0.5 | 0.3571 | G |
| 6 | BICF2P108941           | 59950392 | G | 0.5 | 0.3571 | A |
| 6 | BICF2P469285           | 59974394 | A | 0.5 | 0.6429 | T |
| 6 | TIGRP2P86475_rs9073350 | 59991848 | 0 | 0   | 0      | C |
| 6 | BICF2P1111222          | 60003992 | 0 | 0   | 0      | A |
| 6 | BICF2P500185           | 60016966 | A | 0.5 | 0.6429 | G |
| 6 | BICF2P133171           | 60019425 | C | 0   | 0      | A |
| 6 | BICF2P959873           | 60036150 | A | 1   | 1      | G |
| 6 | BICF2S23716694         | 60049434 | G | 0   | 0      | A |
| 6 | BICF2S23717110         | 60053573 | G | 0   | 0      | A |
| 6 | BICF2P1036271          | 60076530 | G | 0.5 | 0.3571 | A |
| 6 | BICF2P193289           | 60089576 | C | 0   | 0      | A |
| 6 | BICF2S23259398         | 60109664 | A | 0.5 | 0.6429 | G |
| 6 | TIGRP2P86489_rs8798631 | 60119865 | A | 0.5 | 0.6429 | G |
| 6 | BICF2P834932           | 60128276 | A | 0.5 | 0.6429 | G |
| 6 | BICF2P600577           | 60141581 | G | 0.5 | 0.6429 | C |
| 6 | BICF2P294291           | 60143167 | A | 0.5 | 0.6429 | G |
| 6 | BICF2P1092171          | 60145001 | A | 0.5 | 0.3571 | G |
| 6 | BICF2P789099           | 60161586 | G | 0   | 0      | A |
| 6 | BICF2P85572            | 60175473 | A | 0.5 | 0.6429 | G |
| 6 | BICF2P421690           | 60198427 | A | 0.5 | 0.6429 | G |
| 6 | BICF2S23222591         | 60206015 | C | 0   | 0      | A |
| 6 | BICF2P291934           | 60223946 | C | 0.5 | 0.6429 | A |
| 6 | BICF2P414399           | 60226124 | A | 0.5 | 0.6429 | G |
| 6 | BICF2P489011           | 60230491 | A | 0.5 | 0.6429 | G |
| 6 | BICF2P1125826          | 60243203 | A | 0.5 | 0.6429 | C |

|   |                        |          |   |     |        |   |
|---|------------------------|----------|---|-----|--------|---|
| 6 | BICF2S23612881         | 60248756 | G | 0.5 | 0.6429 | A |
| 6 | TIGRP2P86527_rs8848880 | 60260049 | 0 | 0   | 0      | G |
| 6 | TIGRP2P86533_rs8759904 | 60288244 | A | 0   | 0      | G |
| 6 | BICF2P403390           | 60296489 | C | 0   | 0      | A |
| 6 | BICF2P950275           | 60327262 | A | 0   | 0      | G |
| 6 | TIGRP2P86541_rs9136656 | 60331090 | A | 0   | 0      | G |
| 6 | TIGRP2P86547_rs8842961 | 60343389 | A | 0   | 0      | G |
| 6 | BICF2S23729461         | 60368600 | A | 0.5 | 0.6429 | G |
| 6 | BICF2P1065711          | 60375106 | G | 0   | 0      | A |
| 6 | BICF2S23715702         | 60380933 | C | 0.5 | 0.6429 | G |
| 6 | BICF2P1042083          | 60387003 | A | 0.5 | 0.6429 | G |
| 6 | BICF2S2327112          | 60402126 | A | 0   | 0      | G |
| 6 | BICF2S22947893         | 60417224 | A | 0   | 0      | C |
| 6 | BICF2P596498           | 60440867 | A | NA  | 1      | C |
| 6 | BICF2P327538           | 60451698 | A | 0.5 | 0.6429 | G |
| 6 | BICF2S23727354         | 60459798 | C | 0.5 | 0.6429 | A |
| 6 | BICF2P519947           | 60472562 | G | 0.5 | 0.6429 | A |
| 6 | BICF2P1051937          | 60480098 | A | 0.5 | 0.6429 | G |
| 6 | BICF2S2329192          | 60494401 | C | 0   | 0      | A |
| 6 | BICF2P543616           | 60512783 | A | 0   | 0      | C |
| 6 | TIGRP2P86557_rs8953969 | 60515067 | G | 0   | 0      | C |
| 6 | BICF2P1073466          | 60529875 | A | 0.5 | 0.6429 | T |
| 6 | BICF2P1268734          | 60555451 | G | 0   | 0      | A |
| 6 | BICF2P10462            | 60560282 | A | 0   | 0      | C |
| 6 | BICF2P1272438          | 60575002 | A | 1   | 1      | G |
| 6 | BICF2P298105           | 60613781 | G | 0   | 0      | A |
| 6 | BICF2P1073853          | 60624648 | A | 1   | 1      | G |
| 6 | TIGRP2P86569_rs9022614 | 60632695 | G | 1   | 1      | A |
| 6 | BICF2P465509           | 60638865 | G | 0   | 0      | A |
| 6 | BICF2P611266           | 60649668 | G | 0   | 0      | A |
| 6 | BICF2P708736           | 60653369 | A | 0   | 0      | G |
| 6 | BICF2P622317           | 60669474 | 0 | 0   | 0      | A |
| 6 | TIGRP2P86584_rs9123621 | 60674643 | A | 1   | 1      | G |
| 6 | BICF2S2348750          | 60695309 | G | 0   | 0      | A |
| 6 | BICF2S23536986         | 60700069 | A | 0   | 0      | G |
| 6 | BICF2P1072993          | 60709953 | A | 0   | 0      | G |
| 6 | BICF2P194843           | 60738555 | A | 0   | 0      | G |
| 6 | BICF2P958644           | 60743319 | A | 0   | 0      | G |
| 6 | BICF2P1113302          | 60766468 | A | 0   | 0      | G |
| 6 | BICF2P199263           | 60799491 | 0 | 0   | 0      | G |
| 6 | BICF2P1267480          | 60820837 | G | 0   | 0      | A |
| 6 | BICF2P1298139          | 60833078 | A | 0   | 0      | G |
| 6 | BICF2P970959           | 60835520 | G | 0   | 0      | A |
| 6 | TIGRP2P86592_rs8657165 | 60846756 | 0 | 0   | 0      | G |
| 6 | BICF2S23750524         | 60862628 | G | 0   | 0      | A |
| 6 | BICF2S23313782         | 60870177 | 0 | 0   | 0      | G |
| 6 | BICF2P159724           | 60889298 | A | 1   | 1      | G |

|   |                        |          |   |     |        |   |
|---|------------------------|----------|---|-----|--------|---|
| 6 | TIGRP2P86594_rs9187647 | 60898795 | A | 1   | 1      | G |
| 6 | BICF2P77566            | 60903883 | C | 1   | 1      | G |
| 6 | BICF2P77565            | 60904209 | A | 0   | 0      | G |
| 6 | BICF2P388639           | 60916978 | A | 0   | 0      | C |
| 6 | TIGRP2P86606_rs8670319 | 60961910 | G | 0   | 0      | A |
| 6 | TIGRP2P86617_rs8777731 | 60979878 | G | 0   | 0      | A |
| 6 | TIGRP2P86619_rs9250982 | 60993385 | 0 | 0   | 0      | G |
| 6 | BICF2P398183           | 61003471 | A | 0.5 | 0.3571 | G |
| 6 | TIGRP2P86623_rs8502807 | 61015532 | 0 | 0   | 0      | G |
| 6 | TIGRP2P86626_rs8902527 | 61030309 | C | 0.5 | 0.6429 | A |
| 6 | BICF2P1408601          | 61035312 | A | 0.5 | 0.6429 | G |
| 6 | TIGRP2P86629_rs9098882 | 61049862 | 0 | 0   | 0      | C |
| 6 | BICF2P750033           | 61057733 | G | 0.5 | 0.3571 | A |
| 6 | TIGRP2P86631_rs9116915 | 61067579 | A | 0.5 | 0.3571 | G |
| 6 | BICF2P1169937          | 61078575 | A | 0.5 | 0.3571 | G |
| 6 | BICF2P1470193          | 61092413 | G | 0.5 | 0.3571 | A |
| 6 | BICF2P809881           | 61100363 | G | 0.5 | 0.3571 | C |
| 6 | BICF2P297284           | 61121673 | 0 | 0   | 0      | A |
| 6 | BICF2P1349784          | 61124594 | 0 | 0   | 0      | G |
| 6 | BICF2P297406           | 61150443 | 0 | 0   | 0      | A |
| 6 | BICF2S22913017         | 61165243 | G | 0   | 0      | A |
| 6 | BICF2P1136975          | 61170753 | 0 | 0   | 0      | C |
| 6 | BICF2S23728470         | 61185149 | A | 0   | 0      | C |
| 6 | BICF2S2435880          | 61191995 | A | 0.5 | 0.6429 | G |
| 6 | BICF2P211412           | 61211767 | A | 0.5 | 0.3571 | G |
| 6 | BICF2P1446021          | 61221190 | A | 0   | 0      | G |
| 6 | BICF2P814778           | 61226361 | G | 0   | 0      | A |
| 6 | TIGRP2P86696_rs8990176 | 61238948 | A | 1   | 1      | C |
| 6 | TIGRP2P86701_rs8878571 | 61251595 | A | 0   | 0      | C |
| 6 | BICF2P1188898          | 61276296 | G | 0.5 | 0.3571 | A |
| 6 | BICF2S23532366         | 61283746 | A | 0   | 0      | G |
| 6 | BICF2S235854           | 61313760 | G | 0   | 0      | A |
| 6 | BICF2S23534949         | 61325958 | G | 0   | 0      | A |
| 6 | BICF2P190286           | 61346457 | G | 0   | 0      | A |
| 6 | BICF2S23125592         | 61356332 | G | 0   | 0      | A |
| 6 | TIGRP2P86740_rs8613765 | 61365732 | G | 0.5 | 0.3571 | A |
| 6 | TIGRP2P86744_rs9017675 | 61377115 | G | 0.5 | 0.3571 | A |
| 6 | BICF2S23618321         | 61398380 | A | 0   | 0      | G |
| 6 | TIGRP2P86749_rs8678811 | 61402492 | A | 0   | 0      | G |
| 6 | BICF2P834260           | 61420154 | A | 0.5 | 0.3571 | T |
| 6 | BICF2P904645           | 61429617 | A | 0.5 | 0.3571 | G |
| 6 | BICF2S2366689          | 61438237 | G | 0   | 0      | A |
| 6 | BICF2P178065           | 61454812 | G | 0   | 0      | A |
| 6 | BICF2P142651           | 61457227 | G | 0.5 | 0.3571 | A |
| 6 | BICF2P1472011          | 61471708 | A | 0   | 0      | G |
| 6 | TIGRP2P86776_rs8767380 | 61489709 | 0 | 0   | 0      | G |
| 6 | BICF2S23610326         | 61496540 | A | 0   | 0      | G |

|   |                        |          |   |     |        |   |
|---|------------------------|----------|---|-----|--------|---|
| 6 | BICF2S24410264         | 61509033 | 0 | 0   | 0      | A |
| 6 | BICF2P783249           | 61509158 | 0 | 0   | 0      | C |
| 6 | BICF2S23722731         | 61530188 | 0 | 0   | 0      | G |
| 6 | BICF2P1111284          | 61545595 | G | 0.5 | 0.3571 | A |
| 6 | TIGRP2P86796_rs8906630 | 61552393 | G | 0.5 | 0.3571 | A |
| 6 | BICF2P541173           | 61562934 | G | 0.5 | 0.3571 | A |
| 6 | TIGRP2P86801_rs8513365 | 61571443 | G | 0   | 0      | A |
| 6 | TIGRP2P86810_rs9052320 | 61582554 | G | 0   | 0      | A |
| 6 | BICF2P619065           | 61604149 | A | 0   | 0      | G |
| 6 | BICF2P553180           | 61606021 | G | 0   | 0      | A |
| 6 | BICF2P699136           | 61625438 | A | 0.5 | 0.6429 | C |
| 6 | BICF2S23010073         | 61630667 | A | 0.5 | 0.6429 | G |
| 6 | BICF2P131237           | 61640171 | A | 0.5 | 0.6429 | G |
| 6 | BICF2P312036           | 61657004 | G | 0.5 | 0.6429 | A |
| 6 | BICF2S22948389         | 61663313 | G | 0.5 | 0.6429 | A |
| 6 | BICF2P942808           | 61675004 | A | 0.5 | 0.6429 | C |
| 6 | BICF2S23032540         | 61693502 | G | 0   | 0      | A |
| 6 | BICF2P1186238          | 61707171 | A | 0.5 | 0.6429 | G |
| 6 | BICF2P851760           | 61712834 | G | 0.5 | 0.6429 | C |
| 6 | BICF2P1076861          | 61722350 | C | 0   | 0      | A |
| 6 | BICF2P1076854          | 61724158 | G | 0.5 | 0.3571 | A |
| 6 | TIGRP2P86847_rs8817629 | 61744687 | G | 1   | 1      | A |
| 6 | BICF2S23437451         | 61757865 | C | 0   | 0      | A |
| 6 | TIGRP2P86864_rs8832487 | 61767999 | A | 0.5 | 0.3571 | G |
| 6 | BICF2S23151843         | 61785705 | C | 0   | 0      | G |
| 6 | BICF2S23541636         | 61791929 | G | 0   | 0      | C |
| 6 | BICF2P655471           | 61811907 | C | 0   | 0      | A |
| 6 | TIGRP2P86873_rs8968662 | 61814076 | C | 0   | 0      | A |
| 6 | BICF2P195213           | 61826945 | A | 0   | 0      | G |
| 6 | TIGRP2P86899_rs8938233 | 61842480 | G | 1   | 1      | A |
| 6 | BICF2P665648           | 61847975 | A | 1   | 1      | G |
| 6 | BICF2P885715           | 61859528 | A | 0.5 | 0.3571 | G |
| 6 | BICF2P380020           | 61868635 | A | 0.5 | 0.6429 | G |
| 6 | BICF2S23527915         | 61877002 | G | 0.5 | 0.6429 | A |
| 6 | BICF2P851405           | 61881882 | A | 0   | 0      | G |
| 6 | BICF2S22928502         | 61896838 | G | 0   | 0      | A |
| 6 | BICF2S2343856          | 61908996 | C | 0.5 | 0.3571 | A |
| 6 | BICF2S23764709         | 61918906 | A | 0   | 0      | G |
| 6 | BICF2P1320957          | 61931557 | 0 | 0   | 0      | G |
| 6 | TIGRP2P86949_rs9056450 | 61941464 | A | 0   | 0      | G |
| 6 | BICF2P952807           | 61961584 | 0 | 0   | 0      | G |
| 6 | BICF2S2346224          | 61968631 | C | 0.5 | 0.3571 | A |
| 6 | BICF2P711900           | 61976486 | C | 0.5 | 0.6429 | A |
| 6 | BICF2S23734395         | 61988324 | A | 0   | 0      | G |
| 6 | BICF2S23755221         | 62002119 | 0 | 0   | 0      | A |
| 6 | BICF2P547105           | 62010698 | C | 0.5 | 0.6429 | A |
| 6 | BICF2P558739           | 62020121 | A | 0.5 | 0.6429 | G |

|   |                        |          |   |     |        |   |
|---|------------------------|----------|---|-----|--------|---|
| 6 | BICF2P351939           | 62038619 | 0 | 0   | 0      | A |
| 6 | BICF2S23225831         | 62044544 | G | 0.5 | 0.6429 | A |
| 6 | BICF2P112157           | 62074716 | A | 0   | 0      | C |
| 6 | TIGRP2P87028_rs9030393 | 62080186 | C | 0.5 | 0.6429 | A |
| 6 | BICF2S2304986          | 62096174 | A | 0   | 0      | C |
| 6 | BICF2P1184386          | 62106201 | 0 | 0   | 0      | G |
| 6 | TIGRP2P87038_rs8998035 | 62117173 | A | 0   | 0      | G |
| 6 | TIGRP2P87042_rs8703254 | 62132798 | 0 | 0   | 0      | A |
| 6 | BICF2P253632           | 62161658 | A | 0   | 0      | G |
| 6 | BICF2P1722             | 62175962 | A | 0   | 0      | G |
| 6 | BICF2P982011           | 62186705 | 0 | 0   | 0      | A |
| 6 | BICF2S23418268         | 62197170 | G | 0.5 | 0.3571 | A |
| 6 | BICF2P506635           | 62204324 | A | 0.5 | 0.6429 | G |
| 6 | BICF2P399377           | 62221889 | G | 1   | 1      | A |
| 6 | BICF2P1072956          | 62228107 | G | 1   | 1      | A |
| 6 | BICF2P1014719          | 62253381 | G | 0   | 0      | A |
| 6 | BICF2P1007536          | 62261947 | G | 0   | 0      | A |
| 6 | BICF2P91160            | 62276614 | A | 0.5 | 0.6429 | C |
| 6 | BICF2P1081444          | 62289842 | A | 0   | 0      | G |
| 6 | BICF2S23654938         | 62296272 | A | 0.5 | 0.6429 | T |
| 6 | BICF2P868518           | 62313283 | A | 0   | 0      | G |
| 6 | BICF2P810008           | 62328224 | G | 0.5 | 0.3571 | A |
| 6 | BICF2P235529           | 62332572 | A | 0.5 | 0.3571 | G |
| 6 | BICF2S23342444         | 62350448 | A | 0   | 0      | C |
| 6 | BICF2S24411578         | 62360703 | A | 0.5 | 0.3571 | G |
| 6 | BICF2P736978           | 62379658 | G | 0   | 0      | A |
| 6 | BICF2S23641288         | 62392313 | G | 0   | 0      | A |
| 6 | BICF2P229363           | 62411554 | G | 0   | 0      | A |
| 6 | BICF2P208416           | 62424307 | A | 0.5 | 0.3571 | T |
| 6 | BICF2P538955           | 62438493 | A | 1   | 1      | C |
| 6 | BICF2S23349390         | 62446270 | A | 0   | 0      | G |
| 6 | BICF2S2366078          | 62465771 | A | 0   | 0      | G |
| 6 | BICF2S23452996         | 62471154 | G | 0.5 | 0.3571 | A |
| 6 | BICF2P795052           | 62485900 | G | 0.5 | 0.3571 | A |
| 6 | BICF2P1355088          | 62497567 | A | 0.5 | 0.3571 | G |
| 6 | BICF2P813370           | 62503565 | A | 0.5 | 0.6429 | C |
| 6 | BICF2S23452370         | 62522508 | 0 | 0   | 0      | A |
| 6 | BICF2P765518           | 62550832 | A | 0   | 0      | G |
| 6 | BICF2P101339           | 62561582 | 0 | 0   | 0      | C |
| 6 | BICF2P932900           | 62574808 | G | 1   | 1      | A |
| 6 | BICF2P549465           | 62585050 | C | 0.5 | 0.3571 | A |
| 6 | BICF2S23141911         | 62604191 | G | 0   | 0      | A |
| 6 | BICF2P1142664          | 62617408 | G | 0   | 0      | A |
| 6 | BICF2P1268150          | 62622343 | A | 0   | 0      | G |
| 6 | BICF2P395798           | 62636995 | 0 | 0   | 0      | A |
| 6 | BICF2P758308           | 62645435 | C | 0   | 0      | A |
| 6 | BICF2P224834           | 62654302 | A | 0   | 0      | G |

|   |                        |          |   |     |        |   |
|---|------------------------|----------|---|-----|--------|---|
| 6 | BICF2P1105484          | 62674558 | C | 0   | 0      | G |
| 6 | BICF2S23120930         | 62683267 | C | 0   | 0      | A |
| 6 | BICF2P1332357          | 62697537 | A | 0   | 0      | G |
| 6 | BICF2P1332356          | 62698445 | A | 0   | 0      | G |
| 6 | BICF2P1293349          | 62716943 | T | 0   | 0      | A |
| 6 | BICF2S23222934         | 62722023 | G | 0   | 0      | A |
| 6 | BICF2P231859           | 62742278 | A | 0   | 0      | G |
| 6 | BICF2P613412           | 62746010 | A | 1   | 1      | G |
| 6 | BICF2P1061514          | 62771627 | A | 0   | 0      | C |
| 6 | BICF2P362674           | 62789343 | A | 0   | 0      | C |
| 6 | BICF2P1427203          | 62794719 | C | 0   | 0      | G |
| 6 | BICF2P1427204          | 62794756 | A | 0.5 | 0.3571 | G |
| 6 | BICF2P428648           | 62802730 | G | 0.5 | 0.3571 | A |
| 6 | BICF2P434994           | 62813605 | G | 0   | 0      | A |
| 6 | BICF2P410090           | 62832993 | G | 0   | 0      | A |
| 6 | BICF2P961798           | 62836639 | G | 0.5 | 0.6429 | A |
| 6 | BICF2P210780           | 62848084 | G | 0   | 0      | A |
| 6 | BICF2P497651           | 62869102 | C | 0   | 0      | G |
| 6 | BICF2P465951           | 62875173 | A | 0   | 0      | G |
| 6 | BICF2P727450           | 62888256 | G | 0   | 0      | A |
| 6 | BICF2P333904           | 62896139 | 0 | 0   | 0      | G |
| 6 | BICF2S2311545          | 62910947 | A | 0.5 | 0.3571 | G |
| 6 | TIGRP2P87053_rs8512186 | 62920028 | G | 0.5 | 0.3571 | A |
| 6 | TIGRP2P87056_rs8630024 | 62928370 | G | 0.5 | 0.6429 | A |
| 6 | BICF2P79082            | 62940341 | A | 0   | 0      | G |
| 6 | BICF2P5565             | 62959180 | C | 0   | 0      | A |
| 6 | BICF2P725144           | 62970222 | G | 0.5 | 0.6429 | A |
| 6 | BICF2P1270571          | 62975109 | A | 0   | 0      | G |
| 6 | BICF2P1222463          | 62987447 | A | 0   | 0      | G |
| 6 | BICF2P888146           | 63005018 | A | 0   | 0      | C |
| 6 | BICF2P898102           | 63009003 | 0 | 0   | 0      | C |
| 6 | BICF2P105841           | 63023127 | 0 | 0   | 0      | A |
| 6 | BICF2P110565           | 63033554 | G | 0   | 0      | C |
| 6 | BICF2P327764           | 63044393 | 0 | 0   | 0      | C |
| 6 | BICF2P1112472          | 63054671 | C | 0   | 0      | A |
| 6 | BICF2P1223812          | 63066301 | A | 0   | 0      | G |
| 6 | TIGRP2P87061_rs8830962 | 63095370 | 0 | 0   | 0      | G |
| 6 | BICF2P634651           | 63106915 | A | 0.5 | 0.6429 | G |
| 6 | BICF2S23140819         | 63120812 | A | 0.5 | 0.6429 | G |
| 6 | BICF2P1400510          | 63130672 | A | 0   | 0      | G |
| 6 | BICF2P1396752          | 63138611 | C | 0.5 | 0.6429 | A |
| 6 | TIGRP2P87080_rs8880791 | 63152603 | G | 0   | 0      | A |
| 6 | BICF2P937848           | 63161209 | G | 0   | 0      | A |
| 6 | BICF2P525857           | 63174877 | G | 1   | 1      | A |
| 6 | BICF2S23737224         | 63187224 | G | 0.5 | 0.6429 | A |
| 6 | BICF2S23520828         | 63195636 | A | 0.5 | 0.3571 | G |
| 6 | BICF2S23752702         | 63206753 | G | 0   | 0      | A |



|   |                        |          |   |     |        |   |
|---|------------------------|----------|---|-----|--------|---|
| 6 | BICF2P70705            | 63215925 | A | 0.5 | 0.6429 | G |
| 6 | BICF2S2393706          | 63228058 | A | 0   | 0      | T |
| 6 | BICF2P1078426          | 63245275 | A | 0.5 | 0.3571 | G |
| 6 | BICF2P873169           | 63254591 | A | 0   | 0      | G |
| 6 | BICF2S2325865          | 63271591 | A | 0   | 0      | G |
| 6 | BICF2P1160944          | 63278354 | 0 | 0   | 0      | A |
| 6 | BICF2P281040           | 63287011 | A | 0   | 0      | G |
| 6 | BICF2P589225           | 63300576 | A | 0.5 | 0.3571 | G |
| 6 | BICF2P408002           | 63331864 | G | 0.5 | 0.6429 | C |
| 6 | TIGRP2P87139_rs8709997 | 63346352 | G | 0.5 | 0.3571 | A |
| 6 | BICF2S23252692         | 63365446 | A | 0.5 | 0.3571 | G |
| 6 | BICF2P845097           | 63379903 | A | 1   | 1      | G |
| 6 | BICF2S23121355         | 63399019 | A | 1   | 1      | G |
| 6 | BICF2P320503           | 63406115 | G | 0   | 0      | A |
| 6 | BICF2S232143           | 63416474 | A | 0   | 0      | G |
| 6 | BICF2P1325816          | 63429860 | T | 0.5 | 0.6429 | A |
| 6 | BICF2S23257026         | 63437368 | A | 0   | 0      | G |
| 6 | BICF2S2332696          | 63453924 | A | 0   | 0      | G |
| 6 | BICF2P549484           | 63460726 | G | 1   | 1      | A |
| 6 | BICF2P147524           | 63470378 | G | 0.5 | 0.6429 | A |
| 6 | BICF2P463995           | 63483034 | G | 0   | 0      | A |
| 6 | BICF2P1108960          | 63493091 | C | 0   | 0      | G |
| 6 | BICF2P231427           | 63503202 | G | 0.5 | 0.3571 | A |
| 6 | BICF2P75894            | 63517645 | A | 0   | 0      | G |
| 6 | BICF2S2334287          | 63527603 | A | 0   | 0      | G |
| 6 | BICF2S23020274         | 63538006 | G | 0   | 0      | A |
| 6 | BICF2P279040           | 63554364 | 0 | 0   | 0      | G |
| 6 | TIGRP2P87158_rs9137663 | 63567812 | A | 0.5 | 0.6429 | G |
| 6 | BICF2P199411           | 63570146 | 0 | 0   | 0      | C |
| 6 | BICF2P671666           | 63578031 | A | 0   | 0      | G |
| 6 | BICF2P276982           | 63586443 | C | 0.5 | 0.3571 | A |
| 6 | BICF2P1339845          | 63597102 | G | 0   | 0      | A |
| 6 | BICF2P1428226          | 63608217 | G | 0.5 | 0.6429 | A |
| 6 | TIGRP2P87200_rs8734364 | 63622475 | G | 0.5 | 0.6429 | A |
| 6 | BICF2P560185           | 63630933 | C | 0.5 | 0.3571 | A |
| 6 | BICF2P1023017          | 63649862 | A | 0   | 0      | G |
| 6 | TIGRP2P87221_rs8541897 | 63656734 | C | 0.5 | 0.6429 | A |
| 6 | BICF2S23641542         | 63667564 | G | 0.5 | 0.3571 | A |
| 6 | BICF2S23423556         | 63689737 | A | 0   | 0      | T |
| 6 | BICF2P974392           | 63699628 | G | 1   | 1      | A |
| 6 | TIGRP2P87240_rs8755335 | 63715938 | A | 0.5 | 0.3571 | G |
| 6 | TIGRP2P87242_rs8689679 | 63728791 | 0 | 0   | 0      | G |
| 6 | BICF2P1036926          | 63735991 | 0 | 0   | 0      | A |
| 6 | BICF2P827180           | 63760449 | A | 1   | 1      | G |
| 6 | TIGRP2P87243_rs9054968 | 63792850 | A | 0   | 0      | G |
| 6 | TIGRP2P87259_rs8975997 | 63812729 | G | 0   | 0      | A |
| 6 | BICF2S23343696         | 63837155 | A | 0   | 0      | G |

|   |                        |          |   |     |        |   |
|---|------------------------|----------|---|-----|--------|---|
| 6 | BICF2S23219969         | 63852029 | A | 0.5 | 0.6429 | C |
| 6 | TIGRP2P87271_rs8623384 | 63869865 | 0 | 0   | 0      | G |
| 6 | BICF2P408103           | 63880017 | A | 0.5 | 0.6429 | G |
| 6 | BICF2P49766            | 63887224 | 0 | 0   | 0      | C |
| 6 | BICF2S2311602          | 63899266 | C | 0.5 | 0.3571 | A |
| 6 | TIGRP2P87274_rs9165509 | 63913262 | 0 | 0   | 0      | G |
| 6 | BICF2P481450           | 63920249 | 0 | 0   | 0      | C |
| 6 | TIGRP2P87275_rs8895401 | 63930079 | 0 | 0   | 0      | G |
| 6 | BICF2P357252           | 63948192 | A | 0   | 0      | G |
| 6 | BICF2P1347966          | 63951772 | A | 0   | 0      | G |
| 6 | BICF2S2299083          | 63965090 | C | 0   | 0      | A |
| 6 | BICF2P1099363          | 63984905 | G | 0.5 | 0.6429 | A |
| 6 | TIGRP2P87292_rs8524688 | 63990108 | 0 | 0   | 0      | A |
| 6 | BICF2S23635177         | 64013651 | A | 0   | 0      | G |
| 6 | BICF2P576490           | 64022223 | 0 | 0   | 0      | G |
| 6 | BICF2P576823           | 64042403 | 0 | 0   | 0      | G |
| 6 | BICF2P625531           | 64068585 | G | 0   | 0      | A |
| 6 | TIGRP2P87309_rs9074708 | 64082509 | A | 0.5 | 0.6429 | G |
| 6 | BICF2S23211443         | 64089519 | G | 0.5 | 0.6429 | A |
| 6 | BICF2P716098           | 64107861 | T | 0   | 0      | A |
| 6 | BICF2P964325           | 64116450 | A | 0   | 0      | G |
| 6 | TIGRP2P87332_rs9030000 | 64125594 | A | 0   | 0      | G |
| 6 | BICF2P525185           | 64125940 | G | 0   | 0      | C |
| 6 | BICF2P495300           | 64130790 | A | 0   | 0      | G |
| 6 | BICF2P83354            | 64144029 | A | 0   | 0      | G |
| 6 | BICF2P1319609          | 64148071 | A | 0   | 0      | C |
| 6 | TIGRP2P87357_rs8952697 | 64160808 | 0 | 0   | 0      | C |
| 6 | BICF2S2296188          | 64178563 | C | 0   | 0      | A |
| 6 | BICF2P588008           | 64184011 | A | 0   | 0      | T |
| 6 | BICF2S23538323         | 64200096 | C | 0   | 0      | A |
| 6 | BICF2P634837           | 64207330 | A | 0.5 | 0.6429 | C |
| 6 | BICF2P1133718          | 64224120 | G | 1   | 1      | A |
| 6 | BICF2P311492           | 64227595 | C | 0.5 | 0.3571 | A |
| 6 | BICF2P168629           | 64259691 | A | 1   | 1      | G |
| 6 | BICF2S23744548         | 64270223 | G | 1   | 1      | A |
| 6 | BICF2S23454565         | 64282797 | A | 0.5 | 0.6429 | G |
| 6 | BICF2S2366451          | 64296182 | G | 0.5 | 0.3571 | A |
| 6 | BICF2P506883           | 64297568 | A | 0.5 | 0.3571 | G |
| 6 | BICF2S23255626         | 64311854 | A | 1   | 1      | G |
| 6 | TIGRP2P87432_rs8814663 | 64328482 | G | 1   | 1      | A |
| 6 | BICF2P757580           | 64335297 | A | 1   | 1      | G |
| 6 | BICF2P417849           | 64349507 | G | 0.5 | 0.3571 | A |
| 6 | BICF2S23254043         | 64361720 | G | 0.5 | 0.3571 | A |
| 6 | BICF2P646224           | 64366706 | G | 0.5 | 0.3571 | A |
| 6 | BICF2P1001843          | 64379076 | A | 0.5 | 0.3571 | G |
| 6 | BICF2P137382           | 64392715 | G | 0.5 | 0.3571 | A |
| 6 | BICF2P801858           | 64400840 | G | 0.5 | 0.3571 | A |

|   |                        |          |   |     |        |   |
|---|------------------------|----------|---|-----|--------|---|
| 6 | BICF2P247790           | 64415967 | A | 0   | 0      | C |
| 6 | BICF2P778423           | 64428848 | G | 0   | 0      | A |
| 6 | TIGRP2P87455_rs9191113 | 64438120 | G | 0   | 0      | A |
| 6 | BICF2P907347           | 64452973 | A | 0.5 | 0.6429 | G |
| 6 | BICF2P1048718          | 64515515 | 0 | 0   | 0      | A |
| 6 | G417f15S223            | 64556294 | A | 0   | 0      | G |
| 6 | BICF2P1038491          | 64572159 | T | 0   | 0      | A |
| 6 | BICF2S23161298         | 64574764 | 0 | 0   | 0      | G |
| 6 | BICF2S2341163          | 64591554 | G | 0   | 0      | A |
| 6 | G418f66S42             | 64640459 | 0 | 0   | 0      | G |
| 6 | BICF2S23343477         | 64669399 | G | 0   | 0      | A |
| 6 | BICF2S23333023         | 64685011 | A | 0   | 0      | G |
| 6 | BICF2P630785           | 64702736 | 0 | 0   | 0      | A |
| 6 | G419f55S239            | 64739698 | G | 1   | 1      | A |
| 6 | BICF2P1007451          | 64779045 | 0 | 0   | 0      | G |
| 6 | BICF2S23350571         | 64782349 | C | 1   | 1      | A |
| 6 | BICF2S23449711         | 64796234 | G | 0.5 | 0.6429 | A |
| 6 | BICF2S2377519          | 64820355 | A | 0   | 0      | G |
| 6 | BICF2S23419123         | 64880553 | A | 0   | 0      | G |
| 6 | BICF2S23417878         | 64901431 | A | 1   | 1      | G |
| 6 | BICF2P168671           | 64910275 | 0 | 0   | 0      | A |
| 6 | G421f63S108            | 64950274 | G | 0.5 | 0.6429 | A |
| 6 | G421f67S371            | 64952101 | 0 | 0   | 0      | C |
| 6 | BICF2S23416766         | 65016957 | A | 0   | 0      | C |
| 6 | BICF2P239786           | 65025117 | 0 | 0   | 0      | A |
| 6 | BICF2S22918602         | 65060430 | A | 0   | 0      | G |
| 6 | BICF2S22927854         | 65070265 | G | 0.5 | 0.6429 | A |
| 6 | BICF2P237353           | 65102950 | 0 | 0   | 0      | A |
| 6 | BICF2P1134114          | 65119926 | 0 | 0   | 0      | C |
| 6 | BICF2P1136047          | 65153052 | 0 | 0   | 0      | C |
| 6 | BICF2P1170841          | 65166566 | A | 0   | 0      | C |
| 6 | TIGRP2P87477_rs8789635 | 65181579 | A | 0.5 | 0.3571 | C |
| 6 | BICF2P805311           | 65190320 | G | 0   | 0      | A |
| 6 | BICF2P576519           | 65195585 | G | 0   | 0      | A |
| 6 | BICF2P1106762          | 65214237 | A | 0   | 0      | G |
| 6 | BICF2P1489144          | 65222795 | 0 | 0   | 0      | G |
| 6 | BICF2P690837           | 65233617 | A | 0.5 | 0.6429 | T |
| 6 | BICF2S23133929         | 65241552 | A | 0   | 0      | C |
| 6 | BICF2P273403           | 65260150 | C | 0   | 0      | G |
| 6 | BICF2P743911           | 65263299 | G | 0   | 0      | A |
| 6 | BICF2P1298772          | 65274605 | A | 0   | 0      | G |
| 6 | BICF2S23024853         | 65290324 | C | 1   | 1      | A |
| 6 | BICF2P1050727          | 65302492 | A | 1   | 1      | G |
| 6 | BICF2P99256            | 65309431 | A | 0   | 0      | G |
| 6 | BICF2P523607           | 65327456 | 0 | 0   | 0      | A |
| 6 | BICF2P724279           | 65341529 | A | 0   | 0      | G |
| 6 | BICF2P86493            | 65348894 | A | 0   | 0      | C |

|   |                        |          |   |     |        |   |
|---|------------------------|----------|---|-----|--------|---|
| 6 | BICF2S23242919         | 65355385 | G | 0.5 | 0.6429 | C |
| 6 | BICF2P1214185          | 65368819 | G | 0.5 | 0.6429 | A |
| 6 | BICF2P1314874          | 65386653 | C | 0.5 | 0.3571 | A |
| 6 | BICF2P1334599          | 65396095 | G | 0.5 | 0.3571 | A |
| 6 | BICF2P347440           | 65406337 | C | 0.5 | 0.3571 | A |
| 6 | BICF2S23740888         | 65426364 | A | 0   | 0      | G |
| 6 | BICF2S23430299         | 65444790 | G | 0.5 | 0.6429 | A |
| 6 | BICF2P130550           | 65451360 | 0 | 0   | 0      | G |
| 6 | BICF2P1324580          | 65463450 | A | 0.5 | 0.3571 | G |
| 6 | BICF2P922351           | 65470499 | A | 0   | 0      | G |
| 6 | BICF2P808229           | 65486124 | G | 0.5 | 0.6429 | A |
| 6 | BICF2P638578           | 65494405 | 0 | 0   | 0      | C |
| 6 | TIGRP2P87510_rs8752591 | 65512538 | A | 0.5 | 0.3571 | G |
| 6 | TIGRP2P87512_rs8949342 | 65516471 | A | 0.5 | 0.3571 | G |
| 6 | BICF2P927583           | 65530539 | G | 0.5 | 0.3571 | A |
| 6 | BICF2P355274           | 65539191 | G | 0.5 | 0.3571 | A |
| 6 | BICF2S2307368          | 65554216 | A | 0.5 | 0.3571 | G |
| 6 | BICF2S2299521          | 65569246 | A | 0.5 | 0.3571 | G |
| 6 | TIGRP2P87521_rs8960506 | 65580777 | A | 0   | 0      | G |
| 6 | BICF2P421496           | 65588449 | G | 0   | 0      | A |
| 6 | TIGRP2P87532_rs8686846 | 65610633 | G | 0   | 0      | A |
| 6 | BICF2P420093           | 65620601 | A | 0   | 0      | G |
| 6 | BICF2P1391558          | 65631083 | A | 0   | 0      | G |
| 6 | BICF2S2399245          | 65644528 | C | 0   | 0      | A |
| 6 | BICF2P240336           | 65654820 | T | 0   | 0      | A |
| 6 | BICF2S2416720          | 65678391 | G | 0   | 0      | A |
| 6 | BICF2S2295980          | 65696985 | G | 0   | 0      | A |
| 6 | BICF2S22934379         | 65700733 | A | 0   | 0      | G |
| 6 | TIGRP2P87558_rs9065404 | 65719144 | 0 | 0   | 0      | A |
| 6 | BICF2S23035505         | 65739454 | A | 0.5 | 0.3571 | G |
| 6 | BICF2P784528           | 65745561 | A | 0   | 0      | G |
| 6 | TIGRP2P87565_rs8960420 | 65759971 | A | 0.5 | 0.3571 | G |
| 6 | BICF2P810090           | 65779813 | 0 | 0   | 0      | G |
| 6 | BICF2P1148695          | 65789615 | A | 1   | 1      | C |
| 6 | BICF2P947551           | 65801142 | T | 1   | 1      | A |
| 6 | BICF2P769237           | 65814032 | 0 | 0   | 0      | C |
| 6 | TIGRP2P87597_rs8702617 | 65817487 | A | 0   | 0      | G |
| 6 | TIGRP2P87606_rs8703609 | 65836175 | A | 0   | 0      | G |
| 6 | BICF2P1294493          | 65845205 | 0 | 0   | 0      | G |
| 6 | BICF2P776302           | 65851479 | A | 0   | 0      | G |
| 6 | BICF2P778195           | 65860590 | A | 0   | 0      | G |
| 6 | TIGRP2P87629_rs8845384 | 65873983 | G | 1   | 1      | A |
| 6 | BICF2P1184167          | 65887762 | G | 0   | 0      | A |
| 6 | BICF2P934376           | 65905415 | G | 1   | 1      | A |
| 6 | BICF2P352195           | 65908439 | A | 1   | 1      | G |
| 6 | TIGRP2P87665_rs8740729 | 65923213 | 0 | 0   | 0      | C |
| 6 | TIGRP2P87669_rs8925116 | 65937260 | A | 0   | 0      | G |

|   |                        |          |   |     |        |   |
|---|------------------------|----------|---|-----|--------|---|
| 6 | BICF2P670133           | 65943973 | 0 | 0   | 0      | G |
| 6 | BICF2P1077929          | 65957038 | G | 0   | 0      | A |
| 6 | BICF2P536627           | 65964784 | 0 | 0   | 0      | A |
| 6 | BICF2S23445312         | 65986075 | A | 1   | 1      | G |
| 6 | BICF2P1209403          | 65988610 | G | 1   | 1      | A |
| 6 | BICF2S2292952          | 65998514 | G | 0   | 0      | A |
| 6 | TIGRP2P87690_rs9203865 | 66017823 | A | 1   | 1      | G |
| 6 | BICF2P1103956          | 66032060 | A | 1   | 1      | G |
| 6 | BICF2S23719971         | 66042050 | A | 0.5 | 0.6667 | G |
| 6 | TIGRP2P87697_rs8816391 | 66051988 | A | 0.5 | 0.3571 | C |
| 6 | BICF2P537309           | 66057163 | G | 0   | 0      | A |
| 6 | BICF2P626989           | 66071231 | A | 0   | 0      | G |
| 6 | BICF2P579635           | 66090265 | A | 0   | 0      | C |
| 6 | BICF2S23217563         | 66095723 | G | 0.5 | 0.3571 | A |
| 6 | BICF2S23217560         | 66096064 | T | 0   | 0      | A |
| 6 | BICF2P245073           | 66107092 | T | 0   | 0      | A |
| 6 | BICF2S2299683          | 66118013 | A | 0   | 0      | C |
| 6 | BICF2P853584           | 66127301 | A | 0   | 0      | G |
| 6 | BICF2S23648200         | 66132197 | A | 0.5 | 0.3333 | G |
| 6 | BICF2P1027325          | 66141408 | A | 0   | 0      | G |
| 6 | BICF2P1244225          | 66153683 | C | 0.5 | 0.3571 | A |
| 6 | BICF2P649454           | 66165508 | G | 0.5 | 0.6429 | A |
| 6 | BICF2P125612           | 66174460 | A | 0.5 | 0.6429 | G |
| 6 | BICF2P1053155          | 66189273 | 0 | 0   | 0      | A |
| 6 | TIGRP2P87713_rs8938619 | 66195926 | A | 0   | 0      | G |
| 6 | BICF2P138957           | 66211769 | G | 0   | 0      | A |
| 6 | TIGRP2P87718_rs8511654 | 66219907 | G | 0   | 0      | A |
| 6 | BICF2P1099579          | 66239189 | G | 0   | 0      | A |
| 6 | TIGRP2P87735_rs9067251 | 66257945 | G | 0   | 0      | A |
| 6 | BICF2P959944           | 66264250 | G | 0   | 0      | A |
| 6 | BICF2P309509           | 66282503 | G | 0   | 0      | C |
| 6 | BICF2P118532           | 66287594 | G | 0   | 0      | A |
| 6 | BICF2P551715           | 66307928 | A | NA  | 0.3    | C |
| 6 | BICF2P474877           | 66317693 | 0 | 0   | 0      | A |
| 6 | BICF2P92489            | 66325301 | G | 0   | 0      | A |
| 6 | BICF2P1204050          | 66335367 | A | 0   | 0      | G |
| 6 | BICF2P852423           | 66343851 | 0 | 0   | 0      | C |
| 6 | BICF2P771082           | 66384831 | G | 0   | 0      | A |
| 6 | BICF2S23650534         | 66399758 | A | 0   | 0      | G |
| 6 | BICF2P637992           | 66402482 | A | 0   | 0      | G |
| 6 | BICF2P522126           | 66415759 | G | 0   | 0      | A |
| 6 | BICF2P579841           | 66450200 | A | 1   | 1      | C |
| 6 | BICF2P1139196          | 66459844 | A | 1   | 1      | C |
| 6 | BICF2P364431           | 66480242 | G | 0   | 0      | A |
| 6 | TIGRP2P87764_rs8522636 | 66483200 | A | 0.5 | 0.6429 | G |
| 6 | BICF2S2339629          | 66493892 | A | 0.5 | 0.3571 | G |
| 6 | BICF2P1212948          | 66511184 | A | 0   | 0      | T |

|   |                        |          |   |     |        |   |
|---|------------------------|----------|---|-----|--------|---|
| 6 | BICF2P386877           | 66525348 | G | 0   | 0      | A |
| 6 | BICF2S23219258         | 66530429 | A | 0   | 0      | G |
| 6 | BICF2P450499           | 66541470 | C | 0   | 0      | A |
| 6 | TIGRP2P87784_rs9196591 | 66555914 | A | 0   | 0      | G |
| 6 | BICF2P181059           | 66564268 | A | 0.5 | 0.6429 | G |
| 6 | BICF2S2296614          | 66584295 | A | 1   | 1      | C |
| 6 | BICF2P595418           | 66588808 | A | 1   | 1      | G |
| 6 | BICF2S23633900         | 66603775 | C | 0.5 | 0.3571 | A |
| 6 | TIGRP2P87798_rs9012324 | 66611382 | 0 | 0   | 0      | C |
| 6 | BICF2P988961           | 66625488 | A | 0   | 0      | C |
| 6 | TIGRP2P87805_rs8699624 | 66632100 | G | 0   | 0      | A |
| 6 | TIGRP2P87811_rs8935167 | 66650439 | A | 0   | 0      | G |
| 6 | TIGRP2P87816_rs8846908 | 66656242 | C | 0   | 0      | A |
| 6 | TIGRP2P87828_rs8812556 | 66668470 | G | 0.5 | 0.3571 | A |
| 6 | TIGRP2P87829_rs8726422 | 66690141 | G | 0   | 0      | A |
| 6 | BICF2P246114           | 66704233 | A | 0   | 0      | C |
| 6 | BICF2P1270817          | 66716336 | A | 0   | 0      | G |
| 6 | TIGRP2P87834_rs9119907 | 66732806 | A | 0.5 | 0.3571 | T |
| 6 | BICF2S22954879         | 66759363 | A | 0   | 0      | G |
| 6 | BICF2P1412351          | 66785195 | 0 | 0   | 0      | A |
| 6 | BICF2P226511           | 66797401 | A | 0   | 0      | G |
| 6 | BICF2S22917237         | 66813551 | A | 0   | 0      | G |
| 6 | TIGRP2P87846_rs8974542 | 66819964 | 0 | 0   | 0      | A |
| 6 | BICF2P366596           | 66828097 | A | 0   | 0      | G |
| 6 | BICF2P259637           | 66847812 | A | 1   | 1      | G |
| 6 | BICF2P863609           | 66858570 | A | 0   | 0      | G |
| 6 | BICF2P14501            | 66862097 | A | 0   | 0      | G |
| 6 | BICF2S23046678         | 66883624 | A | 0   | 0      | G |
| 6 | BICF2S23041561         | 66889192 | G | 0.5 | 0.6429 | A |
| 6 | TIGRP2P87870_rs8668245 | 66902464 | 0 | 0   | 0      | G |
| 6 | BICF2P1122952          | 66911325 | G | 0   | 0      | A |
| 6 | BICF2P1117112          | 66919806 | A | 0   | 0      | G |
| 6 | TIGRP2P87887_rs9006687 | 66930729 | A | 0.5 | 0.3571 | G |
| 6 | TIGRP2P87898_rs8648936 | 66966180 | G | 0   | 0      | A |
| 6 | BICF2P632821           | 66984348 | A | 0   | 0      | G |
| 6 | BICF2P1020096          | 66996378 | G | 0   | 0      | A |
| 6 | BICF2P1020095          | 66996422 | C | 0   | 0      | G |
| 6 | TIGRP2P87904_rs9154233 | 66999450 | 0 | 0   | 0      | C |
| 6 | TIGRP2P87908_rs8687876 | 67013727 | A | 0   | 0      | G |
| 6 | TIGRP2P87911_rs8726459 | 67026653 | A | 0.5 | 0.3571 | G |
| 6 | BICF2S23349193         | 67033548 | G | 0   | 0      | A |
| 6 | TIGRP2P87922_rs9045499 | 67054707 | A | 0   | 0      | G |
| 6 | BICF2P775687           | 67067226 | T | 0   | 0      | A |
| 6 | BICF2P1421363          | 67074357 | 0 | 0   | 0      | A |
| 6 | BICF2S2454706          | 67085485 | G | 0.5 | 0.3571 | A |
| 6 | BICF2S23634245         | 67105134 | A | 0.5 | 0.6429 | G |
| 6 | BICF2P343289           | 67114265 | G | 0.5 | 0.6429 | A |

|   |                        |          |   |     |        |   |
|---|------------------------|----------|---|-----|--------|---|
| 6 | TIGRP2P87938_rs8513787 | 67128016 | C | 0   | 0      | A |
| 6 | TIGRP2P87952_rs8809702 | 67143919 | A | 0.5 | 0.3571 | C |
| 6 | BICF2P1164286          | 67155823 | A | 0   | 0      | G |
| 6 | BICF2S2324871          | 67169821 | A | 0   | 0      | G |
| 6 | BICF2S23647753         | 67183786 | G | 0.5 | 0.3571 | A |
| 6 | TIGRP2P87959_rs9244341 | 67204158 | A | 0   | 0      | G |
| 6 | BICF2P27847            | 67204751 | A | 0   | 0      | G |
| 6 | BICF2P297165           | 67212203 | A | 1   | 1      | G |
| 6 | BICF2P686463           | 67226027 | A | 0.5 | 0.3571 | G |
| 6 | BICF2P1282892          | 67229211 | A | 0   | 0      | C |
| 6 | BICF2P1084225          | 67240735 | G | 0   | 0      | A |
| 6 | BICF2P430659           | 67258797 | A | 0.5 | 0.6429 | G |
| 6 | BICF2S23310481         | 67268734 | C | 0   | 0      | A |
| 6 | TIGRP2P87989_rs8619708 | 67278471 | G | 0.5 | 0.3571 | A |
| 6 | BICF2P346884           | 67292148 | A | 0.5 | 0.3571 | G |
| 6 | BICF2P176632           | 67308118 | A | 0   | 0      | G |
| 6 | BICF2S23749721         | 67320890 | A | 0   | 0      | G |
| 6 | BICF2S23239841         | 67321474 | C | 0   | 0      | A |
| 6 | BICF2P1145302          | 67332752 | A | 0   | 0      | G |
| 6 | BICF2S230177           | 67354357 | C | 1   | 1      | A |
| 6 | BICF2P61322            | 67361641 | G | 1   | 1      | A |
| 6 | BICF2P374466           | 67370352 | 0 | 0   | 0      | C |
| 6 | BICF2P108249           | 67397978 | G | 0   | 0      | A |
| 6 | BICF2P383598           | 67399369 | G | 0   | 0      | A |
| 6 | BICF2S2345174          | 67405431 | A | 0   | 0      | G |
| 6 | BICF2P262094           | 67417508 | G | 1   | 0.7857 | A |
| 6 | TIGRP2P88017_rs9084389 | 67425837 | C | 0   | 0      | G |
| 6 | TIGRP2P88018_rs8882849 | 67443634 | 0 | 0   | 0      | A |
| 6 | BICF2P1259755          | 67454253 | A | 0   | 0      | G |
| 6 | BICF2P46672            | 67463283 | A | 1   | 0.7857 | G |
| 6 | TIGRP2P88026_rs8545457 | 67472378 | G | 1   | 1      | A |
| 6 | BICF2P123127           | 67489915 | G | 1   | 0.7857 | A |
| 6 | BICF2P1391161          | 67494676 | G | 1   | 0.7857 | A |
| 6 | BICF2P406913           | 67511458 | G | 0   | 0.2143 | C |
| 6 | BICF2P1089887          | 67555484 | 0 | 0   | 0      | A |
| 6 | BICF2S23711715         | 67565957 | A | 1   | 1      | G |
| 6 | BICF2S23735459         | 67587892 | A | 1   | 1      | G |
| 6 | BICF2P109297           | 67610534 | A | 0   | 0      | G |
| 6 | BICF2P1078745          | 67620294 | A | 0   | 0      | G |
| 6 | BICF2S23522685         | 67635723 | A | 0   | 0      | G |
| 6 | BICF2S23322911         | 67648412 | G | 0   | 0      | A |
| 6 | TIGRP2P88050_rs8957070 | 67655533 | 0 | 0   | 0      | C |
| 6 | BICF2S22952477         | 67669535 | A | 0   | 0      | G |
| 6 | BICF2S23634218         | 67692981 | G | 0.5 | 0.8571 | A |
| 6 | BICF2P543455           | 67704985 | C | 0.5 | 0.8571 | A |
| 6 | BICF2P239501           | 67714997 | A | 0   | 0      | G |
| 6 | BICF2P801725           | 67728215 | C | 0   | 0.2143 | A |

|   |                        |          |   |     |        |   |
|---|------------------------|----------|---|-----|--------|---|
| 6 | BICF2S23162143         | 67740404 | G | 0.5 | 0.6429 | A |
| 6 | BICF2P155156           | 67753563 | C | 0.5 | 0.8571 | A |
| 6 | BICF2P324985           | 67768191 | T | 0   | 0      | A |
| 6 | BICF2P1198835          | 67770282 | A | 0.5 | 0.8571 | C |
| 6 | BICF2P1110684          | 67775354 | A | 0   | 0      | C |
| 6 | BICF2P1184416          | 67783598 | G | 0.5 | 0.3571 | A |
| 6 | BICF2P324620           | 67793210 | A | 1   | 1      | G |
| 6 | BICF2P299462           | 67808849 | C | 0.5 | 0.1429 | A |
| 6 | BICF2P1221778          | 67818628 | A | 0   | 0.2143 | G |
| 6 | BICF2G630573273        | 67834338 | A | 0.5 | 0.3571 | G |
| 6 | BICF2G630573244        | 67847074 | A | 0   | 0.2143 | G |
| 6 | BICF2G630573233        | 67851949 | A | 0   | 0      | G |
| 6 | BICF2P198994           | 67893838 | A | 0.5 | 0.6429 | T |
| 6 | BICF2G630573191        | 67897023 | G | 0.5 | 0.6429 | A |
| 6 | BICF2S22910689         | 67918720 | A | 0   | 0      | G |
| 6 | BICF2G630573177        | 67923317 | G | 0   | 0      | A |
| 6 | BICF2G630573169        | 67930904 | G | 1   | 1      | A |
| 6 | BICF2G630573137        | 67949934 | 0 | 0   | 0      | G |
| 6 | BICF2G630573118        | 67964071 | C | 0.5 | 0.1429 | A |
| 6 | BICF2P219331           | 67966280 | A | 0.5 | 0.1429 | G |
| 6 | BICF2P467171           | 67977534 | G | 0   | 0      | A |
| 6 | BICF2S23523195         | 67996689 | A | 0.5 | 0.3571 | G |
| 6 | BICF2P636222           | 68005585 | G | 0.5 | 0.3571 | A |
| 6 | BICF2P400965           | 68013544 | C | 0.5 | 0.1429 | A |
| 6 | BICF2P1194903          | 68023411 | G | 0.5 | 0.3571 | A |
| 6 | BICF2P1001147          | 68039925 | G | 0.5 | 0.6429 | A |
| 6 | BICF2S23710808         | 68048150 | C | 0   | 0.2143 | A |
| 6 | BICF2P894688           | 68065946 | A | 0.5 | 0.6429 | G |
| 6 | BICF2P485436           | 68078786 | 0 | 0   | 0      | A |
| 6 | BICF2S23510762         | 68088453 | A | 0   | 0.2143 | G |
| 6 | TIGRP2P88075_rs9115791 | 68091983 | A | 0   | 0.2143 | G |
| 6 | BICF2P923338           | 68107437 | A | 0.5 | 0.6429 | G |
| 6 | BICF2P582670           | 68116914 | G | 0.5 | 0.6429 | C |
| 6 | BICF2G630573116        | 68132137 | A | 0   | 0      | G |
| 6 | BICF2G630573115        | 68142369 | A | 0.5 | 0.1429 | C |
| 6 | BICF2G630573110        | 68152302 | A | 0.5 | 0.6429 | G |
| 6 | BICF2G630573094        | 68161399 | G | 0.5 | 0.6429 | A |
| 6 | BICF2G630573073        | 68172816 | A | 0.5 | 0.6429 | G |
| 6 | BICF2S23255894         | 68186895 | A | 1   | 1      | G |
| 6 | TIGRP2P88098_rs8728244 | 68196470 | G | 0   | 0      | A |
| 6 | BICF2G630573048        | 68213519 | A | 0   | 0      | G |
| 6 | BICF2G630573031        | 68220557 | A | 0   | 0      | G |
| 6 | BICF2S2369626          | 68235041 | A | 0   | 0      | G |
| 6 | BICF2G630573016        | 68241115 | A | 0   | 0      | G |
| 6 | BICF2S23347682         | 68256055 | A | 0   | 0      | T |
| 6 | BICF2G630573004        | 68269550 | A | 1   | 1      | G |
| 6 | BICF2G630572983        | 68282055 | A | 0   | 0.2143 | G |



|   |                        |          |   |     |        |   |
|---|------------------------|----------|---|-----|--------|---|
| 6 | BICF2G630572971        | 68293289 | A | 0   | 0.2143 | C |
| 6 | BICF2G630572952        | 68306710 | G | 0   | 0      | A |
| 6 | BICF2G630572926        | 68320274 | A | 1   | 1      | G |
| 6 | BICF2P1198195          | 68330390 | A | 0   | 0      | G |
| 6 | BICF2P1198194          | 68330591 | A | 0   | 0      | G |
| 6 | BICF2G630572917        | 68336556 | T | 0   | 0      | A |
| 6 | BICF2G630572901        | 68347721 | A | 0   | 0      | C |
| 6 | BICF2G630572886        | 68358631 | A | 1   | 1      | G |
| 6 | BICF2G630572879        | 68370518 | A | 1   | 1      | G |
| 6 | BICF2G630572874        | 68380212 | G | 0.5 | 0.1429 | A |
| 6 | BICF2G630572873        | 68383151 | G | 0.5 | 0.8571 | A |
| 6 | BICF2P287138           | 68392742 | G | 0.5 | 0.1429 | A |
| 6 | BICF2P828538           | 68404556 | A | 0.5 | 0.1429 | G |
| 6 | BICF2G630572846        | 68408807 | A | 0.5 | 0.8571 | G |
| 6 | BICF2G630572815        | 68423132 | A | 0.5 | 0.8571 | G |
| 6 | BICF2P990234           | 68446744 | A | 0.5 | 0.1429 | G |
| 6 | BICF2G630572784        | 68449683 | A | 0   | 0      | G |
| 6 | BICF2G630572773        | 68466572 | G | 0.5 | 0.8571 | A |
| 6 | BICF2G630572763        | 68478547 | A | 0   | 0      | C |
| 6 | BICF2G630572761        | 68483989 | A | 0.5 | 0.8571 | G |
| 6 | BICF2P888785           | 68495522 | G | 0   | 0      | A |
| 6 | BICF2P1238488          | 68508114 | A | 0.5 | 0.1429 | G |
| 6 | BICF2G630572755        | 68509298 | G | 0.5 | 0.1429 | A |
| 6 | TIGRP2P88173_rs8612773 | 68523446 | A | 0   | 0      | C |
| 6 | BICF2G630572750        | 68531198 | A | 0   | 0      | G |
| 6 | BICF2S23439792         | 68540728 | 0 | 0   | 0      | G |
| 6 | BICF2G630572729        | 68556807 | G | 0.5 | 0.1429 | A |
| 6 | BICF2P1073529          | 68568342 | A | 0.5 | 0.8571 | T |
| 6 | BICF2P809655           | 68583646 | A | 0.5 | 0.1429 | G |
| 6 | BICF2P1186343          | 68586074 | C | 0.5 | 0.1429 | A |
| 6 | BICF2P796344           | 68601035 | 0 | 0   | 0      | A |
| 6 | BICF2G630572687        | 68610084 | G | 0   | 0      | A |
| 6 | BICF2G630572654        | 68628036 | A | 0.5 | 0.1429 | G |
| 6 | BICF2S23410562         | 68638546 | A | 0.5 | 0.1429 | G |
| 6 | BICF2P830055           | 68647443 | G | 0   | 0      | A |
| 6 | BICF2G630572619        | 68655641 | A | 0   | 0      | G |
| 6 | TIGRP2P88207_rs8995254 | 68667359 | A | 1   | 1      | G |
| 6 | TIGRP2P88209_rs8749702 | 68678425 | A | 0.5 | 0.1429 | G |
| 6 | BICF2G630572617        | 68694011 | C | 0.5 | 0.8571 | A |
| 6 | BICF2G630572607        | 68705808 | C | 0.5 | 0.8571 | A |
| 6 | BICF2G630572605        | 68717119 | A | 0.5 | 0.8571 | G |
| 6 | BICF2G630572579        | 68734996 | A | 0   | 0      | G |
| 6 | BICF2G630572577        | 68735988 | C | 1   | 1      | A |
| 6 | BICF2G630572556        | 68747098 | A | 1   | 1      | G |
| 6 | BICF2G630572545        | 68765481 | C | 1   | 1      | A |
| 6 | BICF2G630572527        | 68780605 | C | 0   | 0      | A |
| 6 | BICF2G630572525        | 68783217 | G | 0   | 0      | A |

|   |                        |          |   |     |        |   |
|---|------------------------|----------|---|-----|--------|---|
| 6 | BICF2G630572508        | 68797504 | G | 0   | 0      | A |
| 6 | BICF2G630572498        | 68807112 | G | 0   | 0      | A |
| 6 | BICF2G630572494        | 68816023 | 0 | 0   | 0      | G |
| 6 | BICF2G630572474        | 68827684 | G | 0   | 0      | A |
| 6 | BICF2G630572471        | 68841417 | A | 0   | 0      | G |
| 6 | BICF2G630572467        | 68851349 | A | 0   | 0      | G |
| 6 | BICF2G630572454        | 68864798 | A | 1   | 1      | G |
| 6 | BICF2G630572434        | 68882603 | 0 | 0   | 0      | G |
| 6 | BICF2G630572433        | 68887501 | 0 | 0   | 0      | G |
| 6 | BICF2G630572426        | 68902359 | A | 0   | 0      | G |
| 6 | BICF2G630572418        | 68909274 | C | 0.5 | 0.1429 | A |
| 6 | BICF2G630572402        | 68926540 | G | 0.5 | 0.1429 | A |
| 6 | BICF2G630572392        | 68931118 | A | 0.5 | 0.8571 | C |
| 6 | BICF2P815584           | 68942897 | G | 1   | 1      | A |
| 6 | BICF2G630572390        | 68965078 | 0 | 0   | 0      | G |
| 6 | BICF2G630572389        | 68975190 | A | 0   | 0      | G |
| 6 | BICF2G630572381        | 68977603 | A | 0   | 0      | G |
| 6 | BICF2G630572362        | 68989053 | A | 0.5 | 0.8571 | G |
| 6 | BICF2G630572361        | 68989141 | G | 0.5 | 0.8571 | A |
| 6 | BICF2P577782           | 69006776 | 0 | 0   | 0      | A |
| 6 | BICF2P968416           | 69012192 | G | 0.5 | 0.1429 | A |
| 6 | BICF2S23259928         | 69014755 | G | 0.5 | 0.1429 | A |
| 6 | BICF2P761846           | 69026590 | A | 0   | 0      | G |
| 6 | BICF2G630572341        | 69036068 | A | 0   | 0      | C |
| 6 | BICF2G630572329        | 69054934 | A | 0.5 | 0.8571 | G |
| 6 | BICF2S23413396         | 69058491 | G | 0.5 | 0.1429 | A |
| 6 | BICF2G630572328        | 69073696 | A | 0.5 | 0.1429 | G |
| 6 | BICF2G630572304        | 69084508 | G | 0   | 0      | A |
| 6 | BICF2G630572296        | 69095972 | G | 0.5 | 0.8571 | A |
| 6 | BICF2G630572278        | 69108670 | A | 0.5 | 0.8571 | G |
| 6 | BICF2S23030658         | 69116077 | A | 0.5 | 0.8571 | G |
| 6 | BICF2G630572242        | 69130298 | 0 | 0   | 0      | G |
| 6 | BICF2G630572226        | 69148497 | A | 0.5 | 0.1429 | C |
| 6 | TIGRP2P88217_rs8529227 | 69159095 | 0 | 0   | 0      | G |
| 6 | BICF2G630572225        | 69166870 | G | 0.5 | 0.1429 | A |
| 6 | BICF2G630572214        | 69177030 | A | 1   | 1      | G |
| 6 | BICF2G630572195        | 69185202 | C | 0   | 0      | A |
| 6 | BICF2G630572169        | 69206440 | G | 0.5 | 0.1429 | A |
| 6 | BICF2G630572168        | 69206590 | C | 0.5 | 0.1429 | G |
| 6 | BICF2G630572158        | 69215614 | 0 | 0   | 0      | C |
| 6 | BICF2G630572151        | 69220759 | A | 0.5 | 0.8571 | G |
| 6 | BICF2G630572121        | 69234173 | G | 1   | 1      | A |
| 6 | BICF2G630572097        | 69249185 | C | 1   | 1      | A |
| 6 | BICF2G630572094        | 69255086 | A | 1   | 1      | G |
| 6 | BICF2G630572077        | 69268155 | A | 1   | 1      | G |
| 6 | BICF2G630572067        | 69280162 | C | 0   | 0      | A |
| 6 | BICF2G630572055        | 69293986 | 0 | 0   | 0      | G |

|   |                        |          |   |    |    |   |
|---|------------------------|----------|---|----|----|---|
| 6 | BICF2P11186            | 69307867 | G | 0  | 0  | A |
| 6 | BICF2G630572032        | 69315785 | A | 0  | 0  | G |
| 6 | BICF2G630572026        | 69322847 | A | 0  | 0  | G |
| 6 | BICF2S23450785         | 69334609 | A | 0  | 0  | C |
| 6 | BICF2P741779           | 69352028 | A | 1  | 1  | C |
| 6 | BICF2P1321640          | 69357154 | G | 0  | 0  | A |
| 6 | BICF2G630571987        | 69378590 | 0 | 0  | 0  | A |
| 6 | BICF2G630571976        | 69383262 | A | 0  | 0  | G |
| 6 | BICF2S23131736         | 69391301 | 0 | 0  | 0  | A |
| 6 | BICF2G630571939        | 69404323 | A | 1  | 1  | G |
| 6 | BICF2G630571938        | 69404758 | A | 0  | 0  | C |
| 6 | BICF2G630571914        | 69415116 | C | 0  | 0  | A |
| 6 | BICF2G630571902        | 69425637 | G | 1  | 1  | A |
| 6 | BICF2G630571891        | 69446432 | A | 0  | 0  | G |
| 6 | BICF2P534              | 69450217 | 0 | 0  | 0  | A |
| 6 | BICF2G630571886        | 69467752 | G | 0  | 0  | A |
| 6 | BICF2G630571862        | 69478236 | C | 0  | 0  | G |
| 6 | BICF2G630571851        | 69485364 | A | 0  | 0  | G |
| 6 | BICF2G630571833        | 69498341 | G | 0  | 0  | A |
| 6 | BICF2G630571801        | 69515543 | A | 0  | 0  | G |
| 6 | BICF2G630571791        | 69521763 | A | 0  | 0  | G |
| 6 | BICF2S23227947         | 69535271 | A | 1  | 1  | C |
| 6 | BICF2G630571779        | 69549989 | G | 0  | 0  | A |
| 6 | BICF2G630571756        | 69554911 | A | 0  | 0  | G |
| 6 | BICF2P978985           | 69573857 | G | 0  | 0  | A |
| 6 | BICF2P791349           | 69576459 | C | 0  | 0  | A |
| 6 | TIGRP2P88231_rs8662131 | 69592177 | 0 | 0  | 0  | G |
| 6 | BICF2P1102044          | 69603264 | C | 0  | 0  | A |
| 6 | BICF2P1167880          | 69612597 | G | 0  | 0  | A |
| 6 | BICF2P552062           | 69626188 | A | 1  | 1  | T |
| 6 | BICF2S23118026         | 69640038 | G | 0  | 0  | A |
| 6 | BICF2S23047724         | 69651912 | A | 0  | 0  | G |
| 6 | BICF2P415988           | 69655530 | A | 0  | 0  | C |
| 6 | BICF2P238345           | 69668645 | 0 | 0  | 0  | A |
| 6 | BICF2P1135739          | 69689962 | A | 0  | 0  | G |
| 6 | BICF2P557419           | 69692263 | C | 1  | 1  | A |
| 6 | BICF2S23259242         | 69705462 | 0 | 0  | 0  | G |
| 6 | BICF2P514941           | 69727722 | A | 1  | 1  | G |
| 6 | BICF2P316667           | 69755370 | A | 1  | 1  | G |
| 6 | BICF2P919927           | 69763702 | G | 1  | 1  | A |
| 6 | BICF2P1419435          | 69781135 | 0 | NA | NA | A |
| 6 | BICF2P1419434          | 69782832 | A | 1  | 1  | G |
| 6 | BICF2S23119668         | 69797565 | A | 0  | 0  | G |
| 6 | BICF2P1150732          | 69811618 | A | 1  | 1  | G |
| 6 | BICF2S23239619         | 69819204 | A | 0  | 0  | G |
| 6 | BICF2S2357281          | 69843812 | A | 0  | 0  | C |
| 6 | BICF2P796501           | 69856388 | G | 1  | 1  | A |

|   |                        |          |   |     |        |   |
|---|------------------------|----------|---|-----|--------|---|
| 6 | BICF2S23110903         | 69864585 | A | 0   | 0      | C |
| 6 | BICF2P821432           | 69876423 | A | 0   | 0      | G |
| 6 | BICF2P1255412          | 69886959 | A | 0   | 0      | G |
| 6 | BICF2S23059063         | 69899919 | C | 0   | 0      | A |
| 6 | BICF2P360686           | 69915204 | C | 1   | 1      | A |
| 6 | BICF2P462186           | 69920481 | A | 0   | 0      | G |
| 6 | G422f56S108            | 69960727 | A | 0   | 0      | G |
| 6 | BICF2P370767           | 69986447 | C | NA  | 0      | A |
| 6 | BICF2P1203147          | 69991835 | A | 0   | 0      | T |
| 6 | BICF2P532865           | 70028101 | A | 0   | 0      | C |
| 6 | BICF2P174770           | 70038051 | 0 | 0   | 0      | A |
| 6 | BICF2S23424061         | 70048676 | A | 0   | 0      | T |
| 6 | BICF2P1126620          | 70068903 | 0 | 0   | 0      | A |
| 6 | BICF2P473471           | 70072014 | 0 | 0   | 0      | G |
| 6 | BICF2P850133           | 70099834 | A | 0   | 0      | G |
| 6 | BICF2P1127132          | 70108507 | G | 0   | 0      | A |
| 6 | BICF2P766236           | 70123215 | A | 0   | 0      | G |
| 6 | BICF2P237178           | 70127589 | G | 1   | 1      | A |
| 6 | BICF2P770690           | 70149497 | A | 0   | 0      | G |
| 6 | BICF2P244833           | 70157883 | A | 0   | 0      | C |
| 6 | BICF2P718076           | 70162613 | A | 0   | 0      | G |
| 6 | BICF2S23349262         | 70174395 | G | 0   | 0      | A |
| 6 | TIGRP2P88246_rs9060796 | 70190648 | 0 | 0   | 0      | A |
| 6 | BICF2S23225643         | 70196875 | G | 0   | 0      | A |
| 6 | BICF2S23322286         | 70211768 | A | 0   | 0      | G |
| 6 | BICF2P1247585          | 70228109 | G | 0   | 0      | A |
| 6 | BICF2S2379878          | 70235760 | A | 0   | 0      | G |
| 6 | BICF2P127246           | 70244512 | G | 0   | 0      | A |
| 6 | BICF2P564205           | 70256325 | A | 1   | 1      | G |
| 6 | TIGRP2P88251_rs8976212 | 70279764 | 0 | 0   | 0      | A |
| 6 | BICF2P187508           | 70288387 | A | 0   | 0      | G |
| 6 | BICF2P215991           | 70299964 | G | 0   | 0      | A |
| 6 | BICF2P160606           | 70315388 | A | 0.5 | 0.1429 | G |
| 6 | BICF2P769302           | 70325800 | A | 0   | 0      | G |
| 6 | BICF2P1456868          | 70334295 | A | 0   | 0      | G |
| 6 | BICF2S229947           | 70349872 | A | 0.5 | 0.1429 | C |
| 6 | BICF2P510334           | 70368083 | 0 | 0   | 0      | T |
| 6 | TIGRP2P88254_rs8899019 | 70385111 | 0 | 0   | 0      | A |
| 6 | BICF2S22919682         | 70389307 | G | 0   | 0      | A |
| 6 | BICF2P109243           | 70391662 | G | 0   | 0      | A |
| 6 | BICF2S2305825          | 70410828 | A | 0   | 0      | G |
| 6 | BICF2P318436           | 70419224 | G | 0   | 0      | A |
| 6 | BICF2P305711           | 70426047 | A | 1   | 1      | G |
| 6 | BICF2P85610            | 70441464 | 0 | 0   | 0      | A |
| 6 | BICF2P777165           | 70459579 | A | 1   | 1      | G |
| 6 | BICF2P777166           | 70459789 | C | 1   | 1      | A |
| 6 | BICF2P244126           | 70463308 | A | 0   | 0      | G |

|   |                |          |   |     |        |   |
|---|----------------|----------|---|-----|--------|---|
| 6 | BICF2P371728   | 70478601 | A | 1   | 1      | C |
| 6 | BICF2P260695   | 70483594 | G | 0   | 0      | C |
| 6 | BICF2P648327   | 70495341 | A | 0   | 0      | C |
| 6 | BICF2P1391969  | 70513837 | G | 0   | 0      | A |
| 6 | BICF2P786906   | 70531774 | A | 0   | 0      | G |
| 6 | BICF2P241179   | 70542485 | G | 0   | 0      | A |
| 6 | BICF2P1202719  | 70557716 | G | 0   | 0      | A |
| 6 | BICF2P430368   | 70570384 | G | 1   | 1      | A |
| 6 | BICF2P1085638  | 70577644 | A | 0.5 | 0.1429 | G |
| 6 | BICF2P1432407  | 70599513 | G | 0.5 | 0.1429 | A |
| 6 | BICF2P43826    | 70613817 | A | 0.5 | 0.8571 | G |
| 6 | BICF2S23125293 | 70628977 | A | 0   | 0      | G |
| 6 | BICF2S23653514 | 70635132 | G | 0   | 0      | A |
| 6 | BICF2P183758   | 70650473 | G | 0   | 0      | A |
| 6 | BICF2S2366791  | 70667322 | A | 0   | 0      | G |
| 6 | BICF2P125006   | 70669774 | A | 0   | 0      | G |
| 6 | BICF2P215252   | 70686035 | C | 0   | 0      | A |
| 6 | BICF2P944385   | 70693324 | A | 0   | 0      | C |
| 6 | BICF2P944384   | 70694273 | A | 0.5 | 0.8571 | T |
| 6 | BICF2P798130   | 70704499 | A | 0   | 0      | C |
| 6 | BICF2P674314   | 70715707 | A | 0   | 0      | G |
| 6 | BICF2S23252760 | 70732303 | A | 0.5 | 0.1429 | G |
| 6 | BICF2P1188110  | 70745600 | A | 0   | 0      | G |
| 6 | BICF2P1083703  | 70749705 | A | 0   | 0      | G |
| 6 | BICF2P123652   | 70760663 | G | 0   | 0      | A |
| 6 | BICF2P1011122  | 70771225 | A | 0   | 0      | C |
| 6 | BICF2P732377   | 70782541 | A | 1   | 1      | G |
| 6 | BICF2P1033954  | 70804053 | G | 0.5 | 0.8571 | A |
| 6 | BICF2P1033960  | 70805724 | G | 0.5 | 0.8571 | A |
| 6 | BICF2P976247   | 70817797 | A | 1   | 1      | G |
| 6 | BICF2S23734291 | 70838530 | A | 0   | 0      | G |
| 6 | BICF2P896461   | 70842055 | A | 0   | 0      | G |
| 6 | BICF2P202183   | 70856463 | A | 0   | 0      | G |
| 6 | BICF2P202184   | 70856545 | C | 0   | 0      | A |
| 6 | BICF2P1171974  | 70872372 | 0 | 0   | 0      | A |
| 6 | BICF2P1171978  | 70878760 | A | 0   | 0      | G |
| 6 | BICF2P1266177  | 70890863 | C | 0   | 0      | A |
| 6 | BICF2P118334   | 70904493 | G | 0   | 0      | A |
| 6 | BICF2S23411165 | 70913743 | G | 0   | 0      | A |
| 6 | BICF2S2459570  | 70920838 | 0 | 0   | 0      | A |
| 6 | BICF2S2417676  | 70935639 | G | 0   | 0      | A |
| 6 | BICF2S24413998 | 70950569 | A | 0   | 0      | G |
| 6 | BICF2S23526760 | 70977982 | C | 0.5 | 0.8571 | A |
| 6 | BICF2P125990   | 70979079 | A | 0.5 | 0.1429 | C |
| 6 | BICF2P379919   | 70993234 | 0 | 0   | 0      | G |
| 6 | BICF2P750185   | 71022423 | A | 0   | 0      | G |
| 6 | BICF2P774830   | 71024567 | A | 0   | 0      | G |

|   |                |          |   |     |        |   |
|---|----------------|----------|---|-----|--------|---|
| 6 | BICF2P178881   | 71036304 | A | 0   | 0      | G |
| 6 | BICF2S2316778  | 71055945 | A | 0   | 0      | G |
| 6 | BICF2S23511871 | 71069399 | A | 0   | 0      | G |
| 6 | BICF2P1090473  | 71072027 | 0 | 0   | 0      | T |
| 6 | BICF2P534174   | 71106176 | 0 | 0   | 0      | A |
| 6 | BICF2S23054631 | 71118523 | A | 0   | 0      | G |
| 6 | BICF2S2338152  | 71128832 | C | 1   | 1      | A |
| 6 | BICF2P1003263  | 71166179 | A | 0   | 0      | G |
| 6 | BICF2P968020   | 71178138 | A | 0   | 0      | G |
| 6 | BICF2P194669   | 71188883 | G | 0   | 0      | A |
| 6 | BICF2P278250   | 71206938 | G | 0   | 0      | A |
| 6 | BICF2P1092818  | 71209437 | G | 0   | 0      | A |
| 6 | BICF2P286564   | 71222563 | G | 0   | 0      | A |
| 6 | BICF2P734218   | 71235285 | A | 0   | 0      | G |
| 6 | BICF2S23334364 | 71246449 | A | 0   | 0      | G |
| 6 | BICF2P66349    | 71272760 | C | 0   | 0      | A |
| 6 | BICF2P217996   | 71280052 | A | 1   | 1      | G |
| 6 | BICF2S23327348 | 71289199 | G | 0   | 0      | A |
| 6 | BICF2S2342887  | 71330375 | A | 0.5 | 0.1429 | G |
| 6 | BICF2S22954263 | 71355163 | C | 0.5 | 0.8571 | A |
| 6 | BICF2S23021210 | 71364719 | G | 0.5 | 0.8571 | A |
| 6 | BICF2S22913549 | 71372515 | A | 0.5 | 0.8571 | G |
| 6 | BICF2S23347134 | 71382935 | G | 0.5 | 0.8571 | A |
| 6 | BICF2P775657   | 71395864 | A | 0   | 0      | G |
| 6 | BICF2P379040   | 71414610 | A | 0.5 | 0.8571 | G |
| 6 | BICF2P379036   | 71415268 | G | 0.5 | 0.8571 | A |
| 6 | BICF2P165393   | 71430023 | G | 0.5 | 0.8571 | A |
| 6 | BICF2S2347266  | 71439666 | A | 0.5 | 0.8571 | G |
| 6 | BICF2P697297   | 71457203 | G | 0   | 0      | A |
| 6 | BICF2P1457018  | 71476122 | A | 0   | 0      | G |
| 6 | BICF2P746794   | 71489443 | G | 0   | 0      | A |
| 6 | BICF2P913072   | 71497292 | G | 0.5 | 0.1429 | A |
| 6 | BICF2S23157686 | 71513929 | A | 0.5 | 0.8571 | G |
| 6 | BICF2S23130075 | 71519314 | G | 0.5 | 0.8571 | A |
| 6 | BICF2S23738230 | 71535698 | G | 0.5 | 0.1429 | A |
| 6 | BICF2S2345146  | 71543769 | G | 0.5 | 0.8571 | A |
| 6 | BICF2P425812   | 71581770 | 0 | 0   | 0      | C |
| 6 | BICF2P242526   | 71594911 | A | 0   | 0      | G |
| 6 | BICF2S23510363 | 71601107 | A | 0   | 0      | G |
| 6 | BICF2P209818   | 71614946 | A | 0   | 0      | G |
| 6 | BICF2P1370084  | 71625099 | G | 0.5 | 0.1429 | A |
| 6 | BICF2S2363083  | 71643631 | A | 0.5 | 0.8571 | G |
| 6 | BICF2S2365111  | 71648559 | A | 0.5 | 0.1429 | G |
| 6 | BICF2S2331842  | 71662017 | G | 0.5 | 0.1429 | A |
| 6 | BICF2P1160070  | 71668806 | 0 | 0   | 0      | A |
| 6 | BICF2S22935080 | 71684058 | A | 0.5 | 0.1429 | G |
| 6 | BICF2P331886   | 71692695 | A | 0.5 | 0.8571 | G |

|   |                        |          |   |     |        |   |
|---|------------------------|----------|---|-----|--------|---|
| 6 | BICF2P33955            | 71704228 | G | 0.5 | 0.8571 | A |
| 6 | BICF2P1402560          | 71725438 | T | 0.5 | 0.8    | A |
| 6 | BICF2P822352           | 71731729 | C | 0   | 0      | A |
| 6 | BICF2P184822           | 71737269 | G | 0.5 | 0.1429 | A |
| 6 | BICF2P593866           | 71751153 | A | 0.5 | 0.8571 | G |
| 6 | BICF2S23120846         | 71762138 | G | 0.5 | 0.5714 | A |
| 6 | BICF2S23535398         | 71784545 | G | 0   | 0      | A |
| 6 | BICF2S2326272          | 71797161 | G | 0.5 | 0.5714 | C |
| 6 | BICF2S2332700          | 71818728 | A | 1   | 1      | G |
| 6 | BICF2S23746914         | 71831263 | A | 0.5 | 0.1429 | G |
| 6 | G423f44S93             | 71855698 | A | 0.5 | 0.1429 | G |
| 6 | BICF2S23652830         | 71903756 | A | 0.5 | 0.5714 | C |
| 6 | BICF2P431072           | 71920760 | A | 0   | 0      | G |
| 6 | BICF2P589894           | 71924639 | A | 0   | 0      | T |
| 6 | BICF2P1369667          | 71933773 | A | 0   | 0.25   | G |
| 6 | BICF2P29925            | 71945467 | 0 | 0   | 0      | A |
| 6 | BICF2P497211           | 71962654 | 0 | 0   | 0      | A |
| 6 | BICF2P568467           | 71977180 | G | 0.5 | 0.8571 | A |
| 6 | BICF2P590845           | 71986567 | A | 0.5 | 0.5714 | G |
| 6 | TIGRP2P88273_rs9057744 | 71994261 | 0 | 0   | 0      | A |
| 6 | BICF2P1301244          | 72005602 | G | 0.5 | 0.5714 | A |
| 6 | BICF2P127255           | 72016084 | G | 0.5 | 0.5714 | A |
| 6 | BICF2P588863           | 72025139 | G | 0.5 | 0.5714 | A |
| 6 | BICF2P1132412          | 72037407 | 0 | 0   | 0      | A |
| 6 | TIGRP2P88275_rs9200172 | 72054571 | 0 | 0   | 0      | A |
| 6 | BICF2S23638221         | 72068994 | C | 0   | 0      | A |
| 6 | BICF2S22933176         | 72089371 | C | 0   | 0      | A |
| 6 | BICF2P1323527          | 72117550 | G | 1   | 1      | A |
| 6 | BICF2P193948           | 72140488 | 0 | 0   | 0      | G |
| 6 | BICF2P1328062          | 72168896 | 0 | 0   | 0      | C |
| 6 | BICF2P1059840          | 72181674 | T | 0.5 | 0.5714 | A |
| 6 | BICF2P322288           | 72185613 | A | 0   | 0      | C |
| 6 | BICF2P1112745          | 72202530 | G | 0.5 | 0.8571 | A |
| 6 | BICF2P284643           | 72218483 | A | 0.5 | 0.9167 | C |
| 6 | BICF2P977459           | 72220582 | A | 0.5 | 0.8571 | G |
| 6 | BICF2S23015345         | 72234102 | G | 0.5 | 0.8571 | A |
| 6 | BICF2S23228049         | 72247761 | G | 0   | 0      | A |
| 6 | BICF2P1271261          | 72265391 | A | 0.5 | 0.4286 | G |
| 6 | BICF2P1271262          | 72266604 | G | 0   | 0      | A |
| 6 | BICF2P643804           | 72282176 | A | 0.5 | 0.4167 | G |
| 6 | BICF2P1255497          | 72291280 | A | 0   | 0      | G |
| 6 | BICF2P181876           | 72306265 | C | 0.5 | 0.4286 | A |
| 6 | BICF2P878053           | 72314083 | A | 0.5 | 0.4286 | G |
| 6 | BICF2P362018           | 72328023 | G | 0.5 | 0.4286 | A |
| 6 | BICF2P554770           | 72335962 | G | 0.5 | 0.4286 | A |
| 6 | BICF2S22947516         | 72347457 | A | 0   | 0      | G |
| 6 | BICF2S22937046         | 72359595 | A | 1   | 1      | T |

|   |                        |          |   |     |        |   |
|---|------------------------|----------|---|-----|--------|---|
| 6 | BICF2P961465           | 72380556 | 0 | 0   | 0      | C |
| 6 | BICF2P714132           | 72384660 | A | 0.5 | 0.5714 | G |
| 6 | BICF2S22964623         | 72400262 | G | 0   | 0      | A |
| 6 | BICF2S23748940         | 72401422 | G | 0   | 0      | A |
| 6 | BICF2P1393281          | 72415023 | 0 | 0   | 0      | C |
| 6 | TIGRP2P88290_rs8547271 | 72417795 | 0 | 0   | 0      | C |
| 6 | BICF2P329796           | 72435684 | G | 0.5 | 0.5833 | A |
| 6 | BICF2P122000           | 72438956 | G | 0.5 | 0.1429 | A |
| 6 | BICF2S23332924         | 72453644 | G | 1   | 0.7143 | A |
| 6 | BICF2P1324811          | 72467299 | G | 0   | 0      | A |
| 6 | BICF2S23643946         | 72475149 | A | 0.5 | 0.4286 | G |
| 6 | BICF2S23529473         | 72490699 | G | 0   | 0      | A |
| 6 | BICF2P334934           | 72504751 | A | 0.5 | 0.5714 | G |
| 6 | BICF2P506441           | 72507755 | A | 0.5 | 0.5714 | G |
| 6 | BICF2P439101           | 72520346 | G | 0.5 | 0.5714 | A |
| 6 | BICF2S23148551         | 72539418 | A | 0.5 | 0.5714 | G |
| 6 | BICF2P218273           | 72545779 | A | 0.5 | 0.5714 | G |
| 6 | BICF2P805047           | 72564345 | A | 0.5 | 0.4286 | G |
| 6 | BICF2S23762778         | 72573329 | G | 0.5 | 0.5714 | A |
| 6 | BICF2P1311743          | 72585432 | G | 0.5 | 0.8571 | A |
| 6 | BICF2S23626313         | 72595118 | C | 0   | 0      | A |
| 6 | BICF2P1166527          | 72609680 | G | 0   | 0      | A |
| 6 | BICF2P356164           | 72618779 | G | 1   | 1      | A |
| 6 | BICF2P356165           | 72619068 | A | 1   | 1      | G |
| 6 | BICF2P312019           | 72629375 | A | 1   | 1      | C |
| 6 | BICF2P1387978          | 72641234 | G | 0   | 0      | A |
| 6 | BICF2P1454460          | 72649835 | A | 0   | 0      | T |
| 6 | BICF2P1022465          | 72658286 | C | 0   | 0.2857 | A |
| 6 | BICF2P943740           | 72688795 | G | 0   | 0.2857 | A |
| 6 | BICF2P73013            | 72702379 | G | 0   | 0.2857 | A |
| 6 | BICF2S23719210         | 72709784 | C | 0   | 0      | A |
| 6 | BICF2S23714184         | 72716327 | A | 0   | 0      | C |
| 6 | BICF2P414630           | 72726284 | A | 0   | 0      | G |
| 6 | BICF2P854480           | 72738098 | A | 0   | 0      | G |
| 6 | BICF2P404935           | 72755203 | A | 0   | 0.2857 | G |
| 6 | BICF2P404934           | 72755336 | G | 0   | 0.2857 | A |
| 6 | BICF2S2375248          | 72767225 | A | 0   | 0.2857 | G |
| 6 | BICF2P4923             | 72781031 | A | 1   | 0.7143 | G |
| 6 | BICF2P304243           | 72794199 | 0 | 0   | 0      | C |
| 6 | BICF2P897032           | 72802181 | A | 1   | 0.7143 | G |
| 6 | BICF2S2299076          | 72809082 | A | 0   | 0      | G |
| 6 | BICF2P1224947          | 72823662 | 0 | 0   | 0      | C |
| 6 | BICF2P485619           | 72830429 | G | 0.5 | 0.1429 | A |
| 6 | BICF2P581006           | 72854280 | G | 0.5 | 0.5714 | A |
| 6 | BICF2P511140           | 72868633 | A | 0   | 0.2857 | G |
| 6 | BICF2P1317753          | 72882790 | A | 0   | 0.25   | C |
| 6 | BICF2P614882           | 72888034 | G | 0   | 0      | A |



|   |                        |          |   |     |        |   |
|---|------------------------|----------|---|-----|--------|---|
| 6 | BICF2P98157            | 72903332 | T | 0.5 | 0.8571 | A |
| 6 | BICF2S23338688         | 72919444 | A | 0.5 | 0.8571 | G |
| 6 | BICF2S23538218         | 72922882 | A | 0   | 0.2857 | G |
| 6 | BICF2P527430           | 72926157 | 0 | 0   | 0      | A |
| 6 | BICF2P963769           | 72934175 | A | 0.5 | 0.5714 | G |
| 6 | BICF2P402837           | 72942182 | C | 0.5 | 0.8571 | G |
| 6 | BICF2P133145           | 72946219 | A | 0.5 | 0.5714 | G |
| 6 | BICF2P686407           | 72959144 | G | 0.5 | 0.8571 | A |
| 6 | BICF2P668810           | 72969209 | G | 0.5 | 0.5714 | A |
| 6 | BICF2S23613207         | 72997775 | G | 0   | 0      | A |
| 6 | BICF2P1305330          | 73002526 | A | 0   | 0      | G |
| 6 | BICF2S2307686          | 73019046 | A | 1   | 1      | C |
| 6 | BICF2S23647174         | 73032432 | A | 1   | 0.7143 | G |
| 6 | BICF2S23649199         | 73040354 | G | 0.5 | 0.4286 | A |
| 6 | BICF2S23351904         | 73051392 | A | 0   | 0      | T |
| 6 | BICF2S23148911         | 73067672 | A | 0.5 | 0.4286 | G |
| 6 | BICF2P1389770          | 73082222 | A | 1   | 1      | G |
| 6 | BICF2P703868           | 73085238 | A | 1   | 0.7143 | G |
| 6 | BICF2P830596           | 73102154 | A | 0.5 | 0.5714 | G |
| 6 | TIGRP2P88313_rs8854004 | 73109911 | A | 0.5 | 0.5714 | G |
| 6 | BICF2P483996           | 73119552 | A | 0   | 0      | G |
| 6 | BICF2P798296           | 73130875 | G | 0.5 | 0.8571 | A |
| 6 | BICF2P85413            | 73141149 | G | 0   | 0      | A |
| 6 | TIGRP2P88331_rs8709844 | 73148302 | G | 0   | 0.2857 | A |
| 6 | BICF2S2327266          | 73154557 | 0 | 0   | 0      | C |
| 6 | BICF2P707555           | 73164693 | C | 0.5 | 0.5714 | A |
| 6 | BICF2P881589           | 73175029 | A | 0.5 | 0.5714 | C |
| 6 | BICF2P267983           | 73188388 | A | 0.5 | 0.5714 | G |
| 6 | BICF2P775588           | 73199590 | 0 | 0   | 0      | A |
| 6 | BICF2S23436694         | 73210407 | C | 0.5 | 0.1429 | A |
| 6 | BICF2S2447385          | 73242689 | G | 0   | 0      | A |
| 6 | BICF2P1062513          | 73249458 | G | 1   | 1      | A |
| 6 | BICF2S22940782         | 73266318 | A | 0.5 | 0.5714 | G |
| 6 | BICF2S23411634         | 73271609 | G | 0.5 | 0.4286 | A |
| 6 | TIGRP2P88356_rs8798830 | 73278079 | A | 0.5 | 0.5714 | G |
| 6 | BICF2P459443           | 73292541 | A | 0.5 | 0.5714 | G |
| 6 | TIGRP2P88359_rs8906434 | 73303144 | 0 | 0   | 0      | A |
| 6 | BICF2P967887           | 73323337 | A | 1   | 0.7143 | G |
| 6 | BICF2P932829           | 73326396 | A | 1   | 0.7143 | G |
| 6 | TIGRP2P88360_rs8893746 | 73337656 | A | 0.5 | 0.5714 | C |
| 6 | BICF2P358688           | 73347463 | A | 0.5 | 0.4286 | G |
| 6 | TIGRP2P88364_rs8826295 | 73379544 | G | 0   | 0      | A |
| 6 | BICF2P931853           | 73382477 | 0 | 0   | 0      | C |
| 6 | BICF2P417654           | 73393686 | C | 0   | 0.2857 | G |
| 6 | BICF2P417653           | 73393741 | G | 0   | 0.2857 | A |
| 6 | BICF2S23416431         | 73407675 | G | 0   | 0      | A |
| 6 | BICF2S2372532          | 73419491 | 0 | 0   | 0      | G |

|   |                        |          |   |     |        |   |
|---|------------------------|----------|---|-----|--------|---|
| 6 | BICF2P1443743          | 73428695 | G | 0.5 | 0.4286 | A |
| 6 | BICF2P162906           | 73447401 | A | 0   | 0      | G |
| 6 | BICF2P656888           | 73455131 | G | 0   | 0      | A |
| 6 | BICF2P875072           | 73463101 | A | 0.5 | 0.4286 | C |
| 6 | BICF2S23332030         | 73476971 | G | 0.5 | 0.4286 | A |
| 6 | BICF2S23339408         | 73494074 | G | 0.5 | 0.8571 | A |
| 6 | BICF2S23350426         | 73500427 | A | 0.5 | 0.1429 | G |
| 6 | TIGRP2P88395_rs8949591 | 73508005 | G | 0   | 0.2857 | A |
| 6 | TIGRP2P88405_rs8717789 | 73520204 | A | 0   | 0      | G |
| 6 | BICF2P625115           | 73531104 | A | 0   | 0      | G |
| 6 | TIGRP2P88423_rs9068798 | 73543669 | A | 0   | 0      | C |
| 6 | BICF2P267212           | 73565008 | C | 0.5 | 0.4286 | A |
| 6 | BICF2P761317           | 73567831 | A | 0.5 | 0.4286 | G |
| 6 | BICF2P761316           | 73568134 | A | 0.5 | 0.4286 | G |
| 6 | BICF2P153983           | 73580426 | G | 0   | 0      | A |
| 6 | TIGRP2P88438_rs8611189 | 73585102 | A | 0.5 | 0.1429 | C |
| 6 | BICF2P1244996          | 73592117 | A | 1   | 0.7143 | G |
| 6 | BICF2P1259871          | 73602618 | A | 0.5 | 0.4286 | G |
| 6 | BICF2P715867           | 73621476 | A | 0.5 | 0.4286 | G |
| 6 | TIGRP2P88470_rs9110064 | 73627568 | 0 | 0   | 0      | G |
| 6 | BICF2S23749769         | 73641023 | A | 0   | 0      | G |
| 6 | BICF2P1455791          | 73648849 | G | 0.5 | 0.8571 | A |
| 6 | TIGRP2P88508_rs8796410 | 73666769 | A | 0.5 | 0.8571 | G |
| 6 | TIGRP2P88511_rs8941260 | 73671755 | A | 0   | 0      | G |
| 6 | BICF2P1160648          | 73687495 | G | 0   | 0      | A |
| 6 | BICF2S23160935         | 73693413 | G | 0   | 0      | A |
| 6 | BICF2P1068113          | 73709567 | G | 1   | 0.7143 | A |
| 6 | BICF2S23149227         | 73715151 | C | 0   | 0      | A |
| 6 | BICF2P867290           | 73728180 | A | 0   | 0.2857 | G |
| 6 | BICF2P275966           | 73736397 | C | 0   | 0.25   | A |
| 6 | TIGRP2P88532_rs8916025 | 73745793 | G | 0   | 0      | A |
| 6 | BICF2P1166976          | 73753438 | A | 0   | 0      | G |
| 6 | TIGRP2P88536_rs9201038 | 73768022 | 0 | 0   | 0      | A |
| 6 | BICF2P729715           | 73773653 | 0 | 0   | 0      | A |
| 6 | BICF2S2413530          | 73793071 | 0 | 0   | 0      | C |
| 6 | BICF2P161127           | 73799885 | A | 0   | 0      | G |
| 6 | TIGRP2P88538_rs8944227 | 73807528 | 0 | 0   | 0      | G |
| 6 | BICF2P329165           | 73822129 | A | 0   | 0      | G |
| 6 | BICF2P354557           | 73832185 | A | 0   | 0      | G |
| 6 | TIGRP2P88547_rs8729895 | 73848882 | C | 0   | 0      | A |
| 6 | TIGRP2P88553_rs8928382 | 73868957 | G | 0   | 0      | A |
| 6 | BICF2P1438631          | 73880050 | 0 | 0   | 0      | A |
| 6 | BICF2P448160           | 73888184 | G | 0   | 0      | A |
| 6 | BICF2S22963307         | 73904712 | A | 0.5 | 0.1429 | C |
| 6 | BICF2P335948           | 73918055 | A | 0   | 0      | G |
| 6 | BICF2P725449           | 73930386 | G | 0   | 0      | A |
| 6 | BICF2P272660           | 73941128 | A | 0   | 0      | G |

|   |                        |          |   |     |        |   |
|---|------------------------|----------|---|-----|--------|---|
| 6 | BICF2P586747           | 73948980 | G | 0   | 0      | A |
| 6 | BICF2S22963558         | 73962437 | A | 0   | 0      | G |
| 6 | BICF2P375204           | 73970856 | A | 0   | 0.2857 | G |
| 6 | BICF2P999104           | 73992053 | A | 0   | 0      | G |
| 6 | BICF2P1287550          | 74008000 | 0 | 0   | 0      | A |
| 6 | TIGRP2P88616_rs9178615 | 74025199 | A | 1   | 0.75   | G |
| 6 | BICF2P185141           | 74026413 | G | 1   | 0.7143 | A |
| 6 | BICF2P1367521          | 74040433 | A | 0.5 | 0.4286 | G |
| 6 | BICF2P245414           | 74055371 | 0 | 0   | 0      | G |
| 6 | TIGRP2P88639_rs8774656 | 74061220 | A | 0   | 0.2857 | G |
| 6 | BICF2P301469           | 74081016 | G | 0   | 0      | A |
| 6 | BICF2P413575           | 74084206 | A | 0.5 | 0.5714 | G |
| 6 | BICF2S23259394         | 74096207 | A | 0   | 0      | G |
| 6 | BICF2P28719            | 74107904 | G | 0.5 | 0.1429 | A |
| 6 | BICF2P1098947          | 74119767 | A | 1   | 0.7143 | G |
| 6 | TIGRP2P88668_rs9224784 | 74130488 | 0 | 0   | 0      | A |
| 6 | TIGRP2P88684_rs9181276 | 74146072 | G | 1   | 0.7143 | A |
| 6 | BICF2P534486           | 74154414 | G | 1   | 0.7143 | A |
| 6 | BICF2P744369           | 74173568 | A | 0   | 0      | G |
| 6 | BICF2P744373           | 74174190 | A | 0   | 0      | C |
| 6 | BICF2P99866            | 74177370 | A | 0   | 0      | G |
| 6 | BICF2S23331238         | 74188800 | A | 0.5 | 0.5714 | G |
| 6 | BICF2S2371518          | 74199593 | A | 0   | 0      | G |
| 6 | BICF2S23018870         | 74211364 | A | 0   | 0      | G |
| 6 | TIGRP2P88724_rs8764605 | 74227398 | 0 | 0   | 0      | A |
| 6 | BICF2P233668           | 74240287 | 0 | 0   | 0      | A |
| 6 | BICF2S23325085         | 74250113 | G | 0   | 0      | A |
| 6 | BICF2P1408217          | 74264403 | 0 | 0   | 0      | A |
| 6 | BICF2S23235888         | 74270189 | G | 0   | 0      | A |
| 6 | BICF2P890485           | 74286764 | 0 | 0   | 0      | A |
| 6 | BICF2P1435525          | 74295710 | G | 0   | 0      | A |
| 6 | TIGRP2P88762_rs9071430 | 74307447 | A | 1   | 0.7143 | G |
| 6 | TIGRP2P88766_rs9178817 | 74320335 | 0 | 0   | 0      | G |
| 6 | BICF2S2357652          | 74343315 | G | 0.5 | 0.1429 | A |
| 6 | BICF2S23645642         | 74361498 | A | 0.5 | 0.1429 | G |
| 6 | BICF2P1115299          | 74380258 | G | 0   | 0      | A |
| 6 | BICF2P535814           | 74392041 | C | 0   | 0      | A |
| 6 | BICF2S23624920         | 74397096 | G | 0   | 0.2857 | A |
| 6 | BICF2P303903           | 74438117 | 0 | 0   | 0      | A |
| 6 | BICF2S23452751         | 74448756 | T | 0   | 0.2857 | A |
| 6 | TIGRP2P88786_rs8685773 | 74456777 | 0 | 0   | 0      | G |
| 6 | BICF2P269118           | 74487114 | 0 | 0   | 0      | A |
| 6 | BICF2P234047           | 74498531 | 0 | 0   | 0      | G |
| 6 | BICF2P1002568          | 74515773 | G | 0   | 0.2857 | A |
| 6 | BICF2P1306877          | 74528843 | A | 0   | 0.2857 | G |
| 6 | TIGRP2P88789_rs8734815 | 74538868 | 0 | 0   | 0      | G |
| 6 | BICF2S23726126         | 74546173 | G | 0.5 | 0.8571 | A |

|   |                        |          |   |     |        |   |
|---|------------------------|----------|---|-----|--------|---|
| 6 | BICF2P931589           | 74563057 | G | 0   | 0.2857 | A |
| 6 | BICF2P836186           | 74566464 | A | 0.5 | 0.5714 | G |
| 6 | BICF2P1382920          | 74580586 | G | 0   | 0.2857 | A |
| 6 | BICF2S23033728         | 74598977 | A | 0.5 | 0.1429 | G |
| 6 | BICF2S22924139         | 74606314 | C | 0.5 | 0.5714 | A |
| 6 | BICF2P231510           | 74614492 | A | 1   | 0.7143 | G |
| 6 | BICF2P295274           | 74628324 | G | 0.5 | 0.1429 | A |
| 6 | BICF2P1315             | 74651357 | G | 0   | 0.2857 | A |
| 6 | BICF2P492151           | 74665975 | A | 0.5 | 0.8571 | G |
| 6 | BICF2P1095280          | 74680907 | 0 | 0   | 0      | G |
| 6 | BICF2P235839           | 74695543 | 0 | 0   | 0      | A |
| 6 | BICF2S23140632         | 74729156 | A | 0   | 0.2857 | G |
| 6 | BICF2S23646258         | 74740849 | A | 0   | 0      | G |
| 6 | BICF2S23110412         | 74758766 | A | 0   | 0.2857 | G |
| 6 | BICF2P564915           | 74789510 | 0 | 0   | 0      | C |
| 6 | BICF2S2375156          | 74797515 | G | 0   | 0      | A |
| 6 | BICF2P1300610          | 74818548 | 0 | 0   | 0      | A |
| 6 | BICF2S23741441         | 74826524 | C | 0   | 0      | A |
| 6 | BICF2S23547299         | 74832791 | G | 0.5 | 0.4167 | A |
| 6 | TIGRP2P88793_rs9101920 | 74846143 | 0 | 0   | 0      | G |
| 6 | BICF2S23614729         | 74857914 | A | 0   | 0      | G |
| 6 | BICF2S231978           | 74871163 | A | 0.5 | 0.5714 | G |
| 6 | BICF2S23043091         | 74886317 | A | 0   | 0      | G |
| 6 | BICF2S23327054         | 74891663 | G | 0   | 0      | A |
| 6 | BICF2P1096896          | 74900618 | A | 0   | 0      | G |
| 6 | BICF2P817567           | 74904566 | A | 0.5 | 0.5714 | G |
| 6 | BICF2P240057           | 74911504 | C | 0   | 0      | G |
| 6 | BICF2P1158361          | 74923089 | G | 0.5 | 0.5714 | A |
| 6 | BICF2S23660180         | 74936403 | A | 0   | 0      | G |
| 6 | TIGRP2P88796_rs9142659 | 74946706 | 0 | 0   | 0      | T |
| 6 | BICF2P1294513          | 74958265 | A | 0.5 | 0.4286 | G |
| 6 | BICF2P333784           | 74966206 | A | 0.5 | 0.5714 | C |
| 6 | BICF2P333798           | 74969244 | G | 0.5 | 0.8571 | A |
| 6 | BICF2P1015313          | 74986920 | 0 | 0   | 0      | G |
| 6 | BICF2P24013            | 74994919 | A | 0   | 0.2857 | G |
| 6 | BICF2S23437098         | 75007081 | A | 0.5 | 0.1429 | C |
| 6 | BICF2P359850           | 75016030 | A | 0   | 0.2857 | G |
| 6 | BICF2P908029           | 75029817 | A | 0.5 | 0.1429 | G |
| 6 | BICF2P658600           | 75037830 | G | 0   | 0.2857 | A |
| 6 | BICF2P1337551          | 75071338 | 0 | 0   | 0      | C |
| 6 | BICF2S22952842         | 75079825 | A | 0.5 | 0.8571 | G |
| 6 | BICF2S23450256         | 75087788 | G | 0   | 0      | A |
| 6 | BICF2P490777           | 75095088 | 0 | 0   | 0      | A |
| 6 | BICF2S23010168         | 75107991 | A | 0   | 0.2857 | G |
| 6 | BICF2P804916           | 75127290 | G | 0   | 0.25   | A |
| 6 | BICF2S23248037         | 75136065 | G | 1   | 0.7143 | A |
| 6 | BICF2S23347800         | 75144049 | A | 0   | 0.2857 | G |

|   |                        |          |   |     |        |   |
|---|------------------------|----------|---|-----|--------|---|
| 6 | BICF2P1007516          | 75153399 | A | 0   | 0.2857 | G |
| 6 | BICF2P443955           | 75165859 | C | 0.5 | 0.5714 | A |
| 6 | BICF2P862086           | 75175565 | G | 0.5 | 0.5714 | A |
| 6 | BICF2P1047283          | 75187434 | A | 0   | 0      | G |
| 6 | BICF2P1407953          | 75200286 | A | 0.5 | 0.5833 | C |
| 6 | BICF2P1307413          | 75216742 | 0 | 0   | 0      | A |
| 6 | BICF2P1195736          | 75238567 | A | 0   | 0      | T |
| 6 | BICF2P109974           | 75267147 | A | 0   | 0      | G |
| 6 | BICF2P239338           | 75303383 | 0 | 0   | 0      | A |
| 6 | BICF2P997868           | 75325203 | G | 0.5 | 0.5714 | A |
| 6 | BICF2P551964           | 75358427 | A | 0   | 0      | G |
| 6 | BICF2P385532           | 75368737 | A | 0   | 0      | G |
| 6 | BICF2P459868           | 75374197 | G | 0   | 0      | A |
| 6 | BICF2P438177           | 75388901 | G | 0   | 0      | A |
| 6 | BICF2P1082831          | 75401445 | C | 0   | 0.2857 | A |
| 6 | BICF2P191111           | 75407163 | C | 0.5 | 0.5714 | A |
| 6 | BICF2P334097           | 75420931 | G | 0   | 0      | A |
| 6 | BICF2P521250           | 75430654 | G | 0   | 0      | A |
| 6 | BICF2P913177           | 75450633 | T | 0   | 0      | A |
| 6 | BICF2S23127959         | 75451590 | C | 0   | 0.2857 | G |
| 6 | BICF2P719981           | 75464905 | 0 | 0   | 0      | G |
| 6 | BICF2P1405440          | 75474912 | G | 0   | 0      | A |
| 6 | BICF2P388109           | 75501828 | G | 0   | 0      | A |
| 6 | BICF2P396989           | 75504002 | A | 0   | 0      | C |
| 6 | BICF2S23746262         | 75515635 | A | 0.5 | 0.8571 | G |
| 6 | BICF2S23327375         | 75546859 | G | 0   | 0      | A |
| 6 | BICF2P687236           | 75557484 | 0 | 0   | 0      | A |
| 6 | BICF2P359053           | 75572581 | A | 0.5 | 0.5714 | G |
| 6 | BICF2P1351716          | 75589484 | 0 | 0   | 0      | G |
| 6 | BICF2P179298           | 75599097 | G | 0.5 | 0.5714 | A |
| 6 | BICF2P1173105          | 75602447 | A | 0.5 | 0.5714 | G |
| 6 | BICF2P74219            | 75615262 | A | 0.5 | 0.5714 | C |
| 6 | TIGRP2P88815_rs9106113 | 75631069 | T | 0   | 0      | A |
| 6 | TIGRP2P88818_rs9009076 | 75646735 | G | 0.5 | 0.8571 | A |
| 6 | BICF2P658475           | 75652798 | A | 0.5 | 0.1429 | G |
| 6 | BICF2P869164           | 75667123 | T | 0   | 0.2857 | A |
| 6 | BICF2P1212194          | 75670499 | A | 0   | 0      | G |
| 6 | TIGRP2P88824_rs8960153 | 75682212 | A | 1   | 0.7143 | G |
| 6 | BICF2S23250729         | 75703728 | T | 0.5 | 0.5714 | A |
| 6 | BICF2P809365           | 75705067 | 0 | 0   | 0      | C |
| 6 | TIGRP2P88827_rs8848253 | 75724521 | A | 0   | 0      | G |
| 6 | BICF2P1037374          | 75735599 | A | 0.5 | 0.8571 | C |
| 6 | BICF2P633944           | 75746170 | 0 | 0   | 0      | G |
| 6 | BICF2P765150           | 75758702 | A | 0   | 0      | G |
| 6 | TIGRP2P88831_rs9142646 | 75778360 | A | 0.5 | 0.5714 | C |
| 6 | TIGRP2P88842_rs9157488 | 75789146 | A | 0.5 | 0.8571 | G |
| 6 | BICF2P317996           | 75807066 | G | 0.5 | 0.5    | A |

|   |                        |          |   |     |        |   |
|---|------------------------|----------|---|-----|--------|---|
| 6 | TIGRP2P88851_rs8564536 | 75812055 | A | 1   | 0.7143 | G |
| 6 | BICF2P359785           | 75824568 | A | 0   | 0.2857 | C |
| 6 | BICF2P665588           | 75833905 | G | 0   | 0      | A |
| 6 | BICF2P498515           | 75848537 | A | 0   | 0      | C |
| 6 | BICF2P749141           | 75856156 | G | 0.5 | 0.5714 | A |
| 6 | BICF2P1504861          | 75875701 | A | 0   | 0      | G |
| 6 | BICF2P1310492          | 75885168 | A | 0   | 0      | G |
| 6 | TIGRP2P88896_rs8726223 | 75905175 | A | 0.5 | 0.5714 | C |
| 6 | TIGRP2P88906_rs8795441 | 75919926 | G | 0   | 0      | A |
| 6 | BICF2P305076           | 75933417 | G | 0   | 0.2857 | A |
| 6 | TIGRP2P88910_rs9114987 | 75935622 | G | 0.5 | 0.5714 | A |
| 6 | TIGRP2P89016_rs8590135 | 75969209 | 0 | 0   | 0      | C |
| 6 | BICF2P824783           | 76001303 | G | 0   | 0.2857 | A |
| 6 | BICF2P809156           | 76024488 | 0 | 0   | 0      | C |
| 6 | TIGRP2P89107_rs8622542 | 76048627 | G | 0.5 | 0.5714 | A |
| 6 | BICF2P1147562          | 76056462 | C | 1   | 1      | A |
| 6 | BICF2S23442763         | 76074239 | G | 1   | 0.7143 | A |
| 6 | BICF2P880468           | 76087601 | A | 0   | 0      | G |
| 6 | BICF2P591256           | 76091762 | G | 0   | 0      | A |
| 6 | BICF2P591255           | 76092038 | G | 0.5 | 0.4286 | A |
| 6 | BICF2S2321441          | 76105875 | A | 1   | 1      | G |
| 6 | BICF2S23152668         | 76110658 | A | 0   | 0      | G |
| 6 | BICF2P138775           | 76121128 | A | 1   | 0.7143 | G |
| 6 | BICF2P456049           | 76136927 | 0 | 0   | 0      | A |
| 6 | BICF2P1018238          | 76147740 | G | 0   | 0.2857 | A |
| 6 | TIGRP2P89169_rs9003200 | 76153157 | G | 0   | 0.2857 | A |
| 6 | BICF2P528316           | 76174334 | A | 0.5 | 0.5714 | G |
| 6 | BICF2P512618           | 76176090 | G | 0   | 0      | A |
| 6 | BICF2P397212           | 76195377 | 0 | 0   | 0      | G |
| 6 | TIGRP2P89198_rs8699772 | 76205012 | A | 0   | 0      | G |
| 6 | BICF2P1081             | 76211675 | A | 0   | 0      | G |
| 6 | BICF2P447416           | 76224946 | 0 | 0   | 0      | G |
| 6 | BICF2P1262995          | 76252577 | A | 0   | 0      | G |
| 6 | BICF2P1233105          | 76256784 | T | 1   | 1      | A |
| 6 | BICF2P1095952          | 76269447 | A | 1   | 0.7143 | G |
| 6 | BICF2P114691           | 76284318 | C | 0   | 0.2857 | A |
| 6 | BICF2P1002858          | 76295054 | A | 1   | 0.7143 | G |
| 6 | BICF2S23345712         | 76303108 | G | 1   | 1      | A |
| 6 | TIGRP2P89270_rs8874641 | 76314122 | G | 0   | 0.2857 | A |
| 6 | TIGRP2P89283_rs9103655 | 76336556 | 0 | 0   | 0      | A |
| 6 | BICF2P367142           | 76337419 | A | 0   | 0      | G |
| 6 | BICF2S2299513          | 76348906 | A | 0   | 0      | T |
| 6 | BICF2P590386           | 76360065 | G | 0   | 0      | A |
| 6 | BICF2P1111660          | 76375871 | A | 0.5 | 0.5714 | G |
| 6 | BICF2P334174           | 76388202 | A | 0   | 0      | G |
| 6 | BICF2P1401527          | 76402941 | A | 0   | 0.2857 | G |
| 6 | BICF2P749727           | 76406695 | A | 1   | 1      | G |

|   |                        |          |   |     |        |   |
|---|------------------------|----------|---|-----|--------|---|
| 6 | TIGRP2P89329_rs8967102 | 76427215 | A | 0   | 0.2857 | G |
| 6 | TIGRP2P89332_rs8967105 | 76429622 | G | 0   | 0      | A |
| 6 | TIGRP2P89340_rs8733507 | 76441764 | 0 | 0   | 0      | G |
| 6 | BICF2S23762652         | 76457160 | C | 0.5 | 0.1429 | A |
| 6 | TIGRP2P89361_rs8851626 | 76464085 | A | 0   | 0.2857 | G |
| 6 | TIGRP2P89367_rs8610218 | 76485768 | A | 0   | 0.2857 | G |
| 6 | BICF2P976691           | 76490783 | A | 0   | 0      | C |
| 6 | BICF2P502414           | 76509464 | A | 0.5 | 0.4286 | G |
| 6 | BICF2P502409           | 76510285 | G | 0.5 | 0.5714 | A |
| 6 | TIGRP2P89380_rs9117561 | 76526051 | A | 0.5 | 0.5714 | G |
| 6 | BICF2S23048592         | 76535885 | A | 0   | 0.2857 | G |
| 6 | BICF2P351581           | 76555675 | G | 1   | 1      | A |
| 6 | BICF2P507526           | 76585900 | A | 0   | 0      | G |
| 6 | BICF2P75114            | 76590856 | A | 0   | 0      | G |
| 6 | BICF2P48318            | 76602868 | G | 0   | 0      | A |
| 6 | BICF2P365542           | 76620131 | G | 0.5 | 0.8571 | A |
| 6 | BICF2S2358354          | 76629477 | G | 0.5 | 0.1429 | A |
| 6 | BICF2P80894            | 76644031 | A | 0.5 | 0.1429 | G |
| 6 | TIGRP2P89416_rs8843544 | 76649065 | A | 0   | 0      | G |
| 6 | BICF2P287788           | 76660083 | A | 0.5 | 0.5714 | G |
| 6 | BICF2S2352907          | 76672499 | G | 0   | 0      | A |
| 6 | BICF2P588230           | 76696526 | A | 0   | 0      | C |
| 6 | TIGRP2P89442_rs8576905 | 76709614 | A | 0   | 0.2857 | G |
| 6 | BICF2P236961           | 76717545 | A | 0   | 0      | G |
| 6 | TIGRP2P89455_rs8688528 | 76729583 | A | 0   | 0      | G |
| 6 | BICF2P425963           | 76742716 | A | 0   | 0.2857 | G |
| 6 | BICF2S2315720          | 76766559 | G | 0.5 | 0.5714 | A |
| 6 | TIGRP2P89480_rs8809466 | 76783216 | C | 0.5 | 0.5833 | A |
| 6 | TIGRP2P89486_rs9191021 | 76787449 | A | 0.5 | 0.5714 | T |
| 6 | TIGRP2P89492_rs8982442 | 76812893 | 0 | 0   | 0      | G |
| 6 | BICF2P668278           | 76820650 | A | 0.5 | 0.5714 | G |
| 6 | BICF2P435111           | 76837313 | A | 0.5 | 0.5714 | G |
| 6 | BICF2P897972           | 76848860 | A | 0.5 | 0.5714 | C |
| 6 | BICF2P806375           | 76855792 | A | 0   | 0      | G |
| 6 | TIGRP2P89530_rs9092484 | 76871840 | A | 0.5 | 0.5714 | G |
| 6 | BICF2P274333           | 76894758 | A | 0   | 0      | G |
| 6 | BICF2S23016992         | 76913741 | A | 0   | 0      | G |
| 6 | BICF2P3921             | 76925519 | 0 | 0   | 0      | G |
| 6 | BICF2P1140040          | 76943397 | C | 0   | 0      | A |
| 6 | G424f52S273            | 76965059 | A | 0.5 | 0.5714 | C |
| 6 | TIGRP2P89536_rs8541972 | 76973949 | A | 0   | 0      | G |
| 6 | BICF2S22916589         | 76986467 | G | 0.5 | 0.4286 | A |
| 6 | BICF2P201575           | 77025684 | A | 0.5 | 0.1429 | G |
| 6 | BICF2P1121279          | 77029568 | A | 0.5 | 0.1429 | C |
| 6 | BICF2P1113906          | 77044962 | C | 1   | 1      | A |
| 6 | TIGRP2P89556_rs9065752 | 77060773 | A | 0   | 0      | G |
| 6 | TIGRP2P89558_rs9087838 | 77066102 | T | 0.5 | 0.4286 | A |

|   |                        |          |   |     |        |   |
|---|------------------------|----------|---|-----|--------|---|
| 6 | BICF2P986250           | 77079207 | 0 | 0   | 0      | A |
| 6 | TIGRP2P89568_rs8901978 | 77091639 | 0 | 0   | 0      | A |
| 6 | TIGRP2P89571_rs9042461 | 77097156 | A | 0.5 | 0.8571 | G |
| 6 | TIGRP2P89578_rs9177423 | 77110102 | G | 0   | 0.2857 | A |
| 6 | BICF2G630571722        | 77131288 | G | 0   | 0      | A |
| 6 | BICF2G630571715        | 77142537 | 0 | 0   | 0      | G |
| 6 | BICF2G630571691        | 77155832 | G | 0   | 0      | A |
| 6 | BICF2G630571675        | 77165570 | A | 0.5 | 0.1429 | G |
| 6 | BICF2G630571666        | 77176597 | A | 0   | 0      | G |
| 6 | BICF2G630571645        | 77194987 | A | 0   | 0      | G |
| 6 | BICF2G630571636        | 77202068 | A | 0   | 0      | G |
| 6 | BICF2S2328675          | 77220719 | G | 0   | 0.2857 | A |
| 6 | BICF2G630571622        | 77224586 | A | 0.5 | 0.4286 | G |
| 6 | BICF2G630571601        | 77235711 | A | 1   | 1      | G |
| 6 | TIGRP2P89615_rs9130339 | 77249143 | 0 | 0   | 0      | G |
| 6 | BICF2G630571589        | 77258104 | T | 0   | 0      | A |
| 6 | BICF2G630571579        | 77269226 | A | 0.5 | 0.5714 | G |
| 6 | BICF2P10020            | 77269616 | A | 0   | 0      | C |
| 6 | BICF2G630571552        | 77284782 | A | 0   | 0      | G |
| 6 | BICF2G630571535        | 77294008 | A | 0   | 0      | G |
| 6 | BICF2G630571531        | 77303829 | G | 0   | 0.2857 | A |
| 6 | BICF2G630571519        | 77321152 | G | 0   | 0      | A |
| 6 | BICF2G630571505        | 77327179 | G | 0   | 0      | A |
| 6 | TIGRP2P89636_rs8764239 | 77338454 | G | 0   | 0      | A |
| 6 | TIGRP2P89640_rs9125050 | 77350505 | G | 0   | 0.2857 | A |
| 6 | BICF2G630571468        | 77360944 | G | 0.5 | 0.4286 | A |
| 6 | BICF2S23517874         | 77375484 | G | 0.5 | 0.4286 | A |
| 6 | BICF2G630571430        | 77384003 | A | 0   | 0      | G |
| 6 | BICF2S23443545         | 77399757 | G | 0.5 | 0.1429 | A |
| 6 | BICF2P106731           | 77411902 | G | 0.5 | 0.8571 | A |
| 6 | BICF2P1036828          | 77424934 | 0 | 0   | 0      | A |
| 6 | BICF2G630571381        | 77433367 | C | 0.5 | 0.4286 | G |
| 6 | BICF2P149661           | 77434854 | G | 0   | 0      | A |
| 6 | BICF2G630571352        | 77449496 | A | 0   | 0.2857 | G |
| 6 | BICF2G630571344        | 77453516 | A | 0   | 0      | G |
| 6 | BICF2G630571301        | 77472665 | A | 0.5 | 0.8571 | G |
| 6 | BICF2G630571283        | 77477180 | A | 0.5 | 0.1429 | C |
| 6 | TIGRP2P89666_rs8832339 | 77489905 | A | 0   | 0.2857 | C |
| 6 | BICF2G630571249        | 77499995 | A | 0.5 | 0.8571 | G |
| 6 | BICF2G630571231        | 77511731 | G | 0   | 0      | A |
| 6 | TIGRP2P89672_rs9170619 | 77530500 | 0 | 0   | 0      | A |
| 6 | BICF2G630571229        | 77539214 | A | 0.5 | 0.8571 | G |
| 6 | BICF2G630571215        | 77550213 | C | 0   | 0.25   | A |
| 6 | BICF2G630571209        | 77556062 | G | 0   | 0      | A |
| 6 | BICF2G630571199        | 77575204 | A | 0   | 0      | C |
| 6 | BICF2G630571175        | 77589000 | A | 0.5 | 0.4286 | G |
| 6 | BICF2G630571171        | 77593071 | A | 0   | 0.2857 | C |



|   |                        |          |   |     |        |   |
|---|------------------------|----------|---|-----|--------|---|
| 6 | TIGRP2P89685_rs8862852 | 77610032 | C | 1   | 1      | A |
| 6 | BICF2P1018698          | 77615431 | A | 0   | 0      | C |
| 6 | BICF2S23543007         | 77629027 | A | 0   | 0      | G |
| 6 | BICF2P205523           | 77641341 | G | 1   | 1      | A |
| 6 | TIGRP2P89693_rs8793104 | 77655200 | G | 0.5 | 0.1429 | A |
| 6 | BICF2P991653           | 77656215 | A | 0.5 | 0.1429 | G |
| 6 | BICF2P1463422          | 77665433 | G | 0.5 | 0.8571 | A |
| 6 | BICF2S23216135         | 77673404 | A | 0   | 0      | G |
| 6 | BICF2P336153           | 77683562 | A | 0.5 | 0.8571 | G |
| 6 | BICF2P292750           | 77703258 | G | 0.5 | 0.8571 | A |
| 6 | TIGRP2P89715_rs9194535 | 77716974 | G | 0.5 | 0.8571 | A |
| 6 | BICF2P355360           | 77732992 | A | 0   | 0      | G |
| 6 | BICF2P287475           | 77747380 | A | 0   | 0      | G |
| 6 | BICF2P224656           | 77755003 | A | 0.5 | 0.1429 | C |
| 6 | BICF2S23215733         | 77766545 | G | 0   | 0      | A |
| 6 | BICF2S23329792         | 77780152 | A | 0.5 | 0.1429 | C |
| 6 | TIGRP2P89768_rs9039354 | 77789143 | C | 0   | 0      | G |
| 6 | BICF2S23554285         | 77794550 | A | 0.5 | 0.1429 | G |
| 6 | BICF2P488646           | 77801106 | C | 0   | 0      | A |
| 6 | BICF2P70233            | 77802733 | G | 0.5 | 0.8571 | A |
| 6 | BICF2P70228            | 77804150 | A | 1   | 1      | G |
| 6 | BICF2P687932           | 77820220 | A | 1   | 1      | G |
| 6 | BICF2P687931           | 77821438 | A | 1   | 1      | G |
| 6 | BICF2P985990           | 77833526 | A | 0   | 0      | C |
| 6 | BICF2P1121012          | 77844132 | G | 0.5 | 0.8571 | A |
| 6 | BICF2P267251           | 77855309 | A | 0   | 0      | C |
| 6 | BICF2P1100851          | 77868129 | G | 0.5 | 0.1429 | A |
| 6 | BICF2S23647777         | 77869556 | A | 0   | 0      | C |
| 6 | BICF2P455442           | 77878219 | G | 0.5 | 0.1429 | A |
| 6 | BICF2P776280           | 77893541 | G | 0.5 | 0.1429 | A |
| 6 | BICF2P917627           | 77906343 | A | 0   | 0      | G |
| 6 | BICF2P975802           | 77919140 | A | 0.5 | 0.1429 | G |
| 6 | BICF2P913284           | 77925621 | A | 0.5 | 0.1429 | G |
| 6 | BICF2P658322           | 77937130 | G | 0   | 0      | A |
| 6 | BICF2P312190           | 77950563 | A | 0   | 0      | G |
| 6 | BICF2P320455           | 77969303 | G | 0.5 | 0.1429 | A |
| 6 | BICF2P598298           | 77970718 | G | 0.5 | 0.1429 | A |
| 6 | TIGRP2P89849_rs9088677 | 77984645 | A | 0.5 | 0.8571 | G |
| 6 | BICF2S2367718          | 77989425 | A | 0.5 | 0.8571 | G |
| 6 | TIGRP2P89858_rs8895945 | 78003566 | A | 0.5 | 0.8571 | G |
| 6 | BICF2P347412           | 78010943 | G | 0   | 0      | A |
| 6 | BICF2P501332           | 78023343 | A | 0.5 | 0.8571 | G |
| 6 | BICF2P501333           | 78023438 | G | 0.5 | 0.8571 | A |
| 6 | BICF2P130884           | 78033560 | G | 0   | 0      | A |
| 6 | TIGRP2P89886_rs9136948 | 78041316 | A | 0   | 0      | G |
| 6 | BICF2P490359           | 78053987 | G | 0   | 0      | A |
| 6 | BICF2P1042454          | 78070732 | A | 0   | 0      | G |

|   |                        |          |   |     |         |   |
|---|------------------------|----------|---|-----|---------|---|
| 6 | TIGRP2P89901_rs8679202 | 78081387 | A | 0   | 0       | G |
| 6 | TIGRP2P89907_rs8744858 | 78085058 | G | 0   | 0       | A |
| 6 | BICF2S23329863         | 78106812 | A | 0   | 0       | G |
| 6 | BICF2S23039484         | 78113065 | A | 0.5 | 0.8571  | G |
| 6 | BICF2P1349445          | 78120003 | A | 0.5 | 0.08333 | G |
| 6 | TIGRP2P89953_rs8802163 | 78133433 | A | 0   | 0       | G |
| 6 | BICF2P944537           | 78147350 | A | 0   | 0       | G |
| 6 | BICF2S23256926         | 78163165 | C | 0   | 0       | A |
| 6 | BICF2P1345539          | 78169276 | G | 0   | 0       | A |
| 6 | BICF2S23052312         | 78178828 | A | 0   | 0       | G |
| 6 | BICF2P283805           | 78191162 | A | 0   | 0       | G |
| 6 | BICF2P609201           | 78224617 | A | 0.5 | 0.8571  | G |
| 6 | TIGRP2P90023_rs8731644 | 78238858 | A | 0   | 0       | G |
| 6 | BICF2P715457           | 78246394 | A | 0   | 0       | G |
| 6 | BICF2P384738           | 78266275 | A | 0.5 | 0.8571  | G |
| 6 | BICF2P1438222          | 78273639 | G | 0.5 | 0.1429  | A |
| 6 | TIGRP2P90064_rs8803448 | 78282852 | A | 0.5 | 0.8571  | C |
| 6 | BICF2P253208           | 78302460 | G | 0.5 | 0.1429  | A |
| 6 | BICF2P1208554          | 78319174 | T | 0   | 0       | A |
| 6 | TIGRP2P90090_rs9172805 | 78332403 | A | 0   | 0       | G |
| 6 | BICF2S23754548         | 78341718 | A | NA  | 0.1429  | G |
| 6 | TIGRP2P90109_rs8933494 | 78350150 | A | 0   | 0       | G |
| 6 | BICF2P698981           | 78369364 | A | 1   | 1       | G |
| 6 | BICF2P1122840          | 78375810 | A | 0   | 0       | G |
| 6 | BICF2S2378638          | 78388255 | C | 0.5 | 0.8571  | A |
| 6 | BICF2S23054727         | 78398255 | A | 0   | 0       | G |
| 6 | BICF2P812176           | 78410602 | A | 0.5 | 0.1429  | G |
| 6 | BICF2P1107072          | 78421278 | A | 0   | 0       | G |
| 6 | BICF2P383010           | 78434106 | A | 0.5 | 0.1429  | G |
| 6 | TIGRP2P90178_rs8568020 | 78444024 | A | 1   | 1       | C |
| 6 | BICF2P1419826          | 78458176 | A | 0   | 0       | G |
| 6 | BICF2P322722           | 78472627 | 0 | 0   | 0       | C |
| 6 | BICF2P1274052          | 78476758 | C | 0   | 0       | A |
| 6 | BICF2P596471           | 78496186 | G | 0   | 0       | A |
| 6 | TIGRP2P90200_rs8931445 | 78504797 | A | 0.5 | 0.1429  | T |
| 6 | BICF2P82635            | 78523151 | A | 0   | 0       | G |
| 6 | BICF2P154378           | 78537705 | C | 0   | 0       | A |
| 6 | BICF2P150932           | 78545554 | A | 0   | 0       | G |
| 6 | BICF2S2317682          | 78576602 | A | 1   | 1       | G |
| 6 | BICF2P232749           | 78586053 | A | 0   | 0       | G |
| 6 | TIGRP2P90223_rs9196765 | 78598270 | A | 0.5 | 0.1429  | T |
| 6 | BICF2P1087067          | 78610092 | A | 0.5 | 0.1429  | G |
| 6 | BICF2P677112           | 78619364 | G | 0.5 | 0.1429  | A |
| 6 | BICF2S2337             | 78647929 | A | 0.5 | 0.1429  | G |
| 6 | BICF2P1334285          | 78649878 | A | 0   | 0       | G |
| 6 | BICF2P1364630          | 78656802 | G | 0.5 | 0.1429  | A |
| 6 | BICF2P1364629          | 78656873 | A | 0   | 0       | C |

|   |                        |          |   |      |        |   |
|---|------------------------|----------|---|------|--------|---|
| 6 | BICF2P1067521          | 78662955 | G | 0.5  | 0.8571 | A |
| 6 | BICF2P749222           | 78674888 | A | 0    | 0      | G |
| 6 | BICF2P481353           | 78688713 | G | 0    | 0      | A |
| 6 | BICF2P114509           | 78701190 | A | 1    | 1      | G |
| 6 | BICF2P635865           | 78717425 | A | 0.5  | 0.1429 | G |
| 6 | BICF2P1369576          | 78724374 | A | 0    | 0      | G |
| 6 | BICF2P515745           | 78729918 | C | 0    | 0      | A |
| 6 | BICF2P946100           | 78749491 | G | 1    | 1      | C |
| 6 | BICF2P1365605          | 78759316 | A | 0.75 | 0.8571 | G |
| 6 | BICF2P852676           | 78773626 | A | 0.75 | 0.8571 | G |
| 6 | BICF2P596466           | 78780504 | A | 0.75 | 0.8571 | G |
| 6 | BICF2P520012           | 78807439 | A | 0.75 | 0.8571 | G |
| 6 | BICF2P1186362          | 78818305 | A | 0.75 | 0.8571 | C |
| 6 | BICF2S2323334          | 78821808 | A | 0.25 | 0.1429 | G |
| 6 | TIGRP2P90254_rs8899382 | 78838342 | A | 0.25 | 0.1429 | G |
| 6 | BICF2G630571102        | 78854967 | G | 0.75 | 0.8571 | A |
| 6 | BICF2G630571098        | 78859005 | A | 0.75 | 0.8571 | G |
| 6 | BICF2G630571063        | 78877361 | G | 0    | 0      | A |
| 6 | BICF2G630571052        | 78882272 | A | 0    | 0      | G |
| 6 | BICF2G630571046        | 78894075 | G | 0    | 0      | A |
| 6 | BICF2G630571029        | 78902564 | G | 0.25 | 0.1429 | A |
| 6 | BICF2G630570981        | 78923730 | A | 0    | 0      | G |
| 6 | BICF2G630570976        | 78924967 | 0 | 0    | 0      | G |
| 6 | BICF2G630570942        | 78938009 | A | 0.75 | 0.8571 | G |
| 6 | BICF2G630570917        | 78953541 | A | 1    | 1      | G |
| 6 | TIGRP2P90273_rs9219697 | 78961846 | A | 0.25 | 0.1429 | G |
| 6 | BICF2G630570912        | 78993367 | A | 0    | 0      | G |
| 6 | BICF2P632554           | 79025251 | G | 0.75 | 0.8571 | A |
| 6 | BICF2G630570882        | 79035462 | C | 1    | 1      | A |
| 6 | TIGRP2P90278_rs8673950 | 79047497 | G | 0.75 | 0.8571 | A |
| 6 | BICF2P1039536          | 79055321 | G | 0    | 0      | A |
| 6 | BICF2P1070924          | 79062734 | G | 0    | 0      | A |
| 6 | BICF2G630570876        | 79078366 | G | 0.25 | 0.1429 | A |
| 6 | BICF2G630570870        | 79098475 | A | 0    | 0      | C |
| 6 | BICF2G630570828        | 79131152 | C | 0    | 0      | A |
| 6 | BICF2P462796           | 79140998 | C | 0    | 0      | A |
| 6 | BICF2G630570799        | 79152504 | A | 0    | 0      | G |
| 6 | BICF2G630570795        | 79155022 | A | 0    | 0      | G |
| 6 | TIGRP2P90304_rs9158318 | 79173845 | G | 0.75 | 0.8571 | A |
| 6 | BICF2G630570756        | 79178284 | C | 0    | 0      | A |
| 6 | BICF2G630570744        | 79192747 | A | 0.75 | 0.8571 | G |
| 6 | BICF2G630570715        | 79204016 | A | 0.25 | 0.1429 | G |
| 6 | TIGRP2P90334_rs8927380 | 79214019 | A | 0    | 0      | G |
| 6 | BICF2G630570676        | 79226258 | A | 1    | 1      | G |
| 6 | BICF2P640478           | 79243487 | G | 1    | 1      | A |
| 6 | BICF2G630570637        | 79250248 | A | 0    | 0      | C |
| 6 | BICF2P1025924          | 79262757 | G | 0.25 | 0.1429 | C |

|   |                        |          |   |      |        |   |
|---|------------------------|----------|---|------|--------|---|
| 6 | BICF2G630570603        | 79270786 | A | 0    | 0      | G |
| 6 | TIGRP2P90355_rs8719794 | 79283709 | A | 0    | 0      | G |
| 6 | TIGRP2P90358_rs9189865 | 79292627 | A | 0    | 0      | C |
| 6 | BICF2G630570590        | 79317026 | C | 0    | 0      | A |
| 6 | BICF2P1185001          | 79327939 | G | 0.25 | 0.1429 | A |
| 6 | TIGRP2P90382_rs8812416 | 79345687 | A | 0    | 0      | G |
| 6 | BICF2P694137           | 79352702 | G | 0    | 0      | A |
| 6 | BICF2G630570582        | 79369311 | A | 0.75 | 0.8571 | G |
| 6 | BICF2G630570563        | 79381705 | 0 | 0    | 0      | G |
| 6 | BICF2G630570558        | 79385833 | A | 0.75 | 0.8571 | G |
| 6 | BICF2S23328480         | 79393593 | G | 0    | 0      | C |
| 6 | BICF2P332851           | 79402284 | A | 0.25 | 0.1429 | G |
| 6 | TIGRP2P90393_rs8724614 | 79407506 | A | 0.25 | 0.1429 | G |
| 6 | BICF2S23763215         | 79426005 | G | 0    | 0      | A |
| 6 | BICF2P202069           | 79433131 | A | 1    | 1      | G |
| 6 | BICF2P435754           | 79450340 | A | 0    | 0      | C |
| 6 | BICF2G630570544        | 79461380 | A | 0.25 | 0.1429 | G |
| 6 | BICF2P641351           | 79469669 | G | 0    | 0      | A |
| 6 | TIGRP2P90428_rs8762061 | 79490525 | A | 0    | 0      | G |
| 6 | BICF2S22913845         | 79501672 | G | 0.25 | 0.1429 | A |
| 6 | BICF2G630570502        | 79513645 | C | 0.25 | 0.1429 | A |
| 6 | BICF2P175783           | 79523880 | G | 0    | 0      | A |
| 6 | BICF2P12416            | 79543521 | G | 0.75 | 0.8571 | A |
| 6 | BICF2G630570484        | 79548435 | A | 0.25 | 0.1429 | G |
| 6 | BICF2S23752047         | 79558311 | A | 0    | 0      | C |
| 6 | BICF2P1142550          | 79570471 | G | 0    | 0      | A |
| 6 | BICF2S23653917         | 79572769 | A | 0    | 0      | G |
| 6 | BICF2G630570431        | 79588874 | G | 0    | 0      | A |
| 6 | BICF2G630570417        | 79593084 | A | 0    | 0      | G |
| 6 | BICF2G630570409        | 79594656 | C | 0    | 0      | G |
| 6 | BICF2S2324738          | 79603643 | A | 0    | 0      | G |
| 6 | BICF2P526944           | 79619818 | A | 1    | 1      | G |
| 6 | BICF2G630570379        | 79620341 | 0 | 0    | 0      | G |
| 6 | BICF2S22960558         | 79627199 | A | 1    | 1      | G |
| 6 | BICF2S23159500         | 79643019 | A | 0    | 0      | G |
| 6 | BICF2G630570329        | 79653798 | A | 0    | 0      | G |
| 6 | BICF2G630570319        | 79661399 | G | 0    | 0      | A |
| 6 | BICF2G630570315        | 79664152 | A | 0    | 0      | C |
| 6 | BICF2G630570308        | 79677555 | C | 1    | 1      | A |
| 6 | BICF2P780655           | 79683554 | 0 | 0    | 0      | A |
| 6 | BICF2G630570306        | 79698951 | A | 0    | 0      | G |
| 6 | BICF2P946428           | 79709984 | G | 1    | 1      | A |
| 6 | BICF2G630570285        | 79733707 | G | 1    | 1      | A |
| 6 | BICF2G630570263        | 79748480 | G | 0    | 0      | A |
| 6 | BICF2P1319096          | 79753433 | T | 0    | 0      | A |
| 6 | BICF2G630570238        | 79761402 | A | 1    | 1      | G |
| 6 | BICF2G630570229        | 79765304 | A | 0    | 0      | G |

|   |                        |          |   |   |        |   |
|---|------------------------|----------|---|---|--------|---|
| 6 | BICF2G630570203        | 79784818 | G | 0 | 0      | A |
| 6 | BICF2S22919917         | 79796333 | A | 1 | 1      | G |
| 6 | BICF2G630570184        | 79798730 | G | 0 | 0      | A |
| 6 | BICF2G630570129        | 79819593 | G | 0 | 0      | A |
| 6 | BICF2G630570117        | 79822385 | A | 0 | 0      | G |
| 6 | BICF2G630570094        | 79838277 | A | 0 | 0      | G |
| 6 | BICF2S23444390         | 79860449 | A | 0 | 0      | G |
| 6 | BICF2G630570093        | 79873595 | C | 1 | 1      | G |
| 6 | BICF2P990631           | 79886377 | A | 0 | 0      | G |
| 6 | BICF2G630570091        | 79894347 | A | 0 | 0      | G |
| 6 | BICF2S2451868          | 79905810 | A | 0 | 0      | G |
| 6 | BICF2G630570090        | 79930175 | G | 0 | 0      | A |
| 6 | BICF2G630570089        | 79937701 | A | 0 | 0      | G |
| 6 | BICF2S23019861         | 79959761 | G | 1 | 1      | A |
| 6 | BICF2G630570066        | 79976113 | C | 0 | 0      | A |
| 6 | BICF2P1437917          | 79989182 | A | 0 | 0      | G |
| 6 | BICF2G630570063        | 79998676 | 0 | 0 | 0      | G |
| 6 | BICF2G630570056        | 80010327 | G | 0 | 0      | A |
| 6 | BICF2G630570015        | 80024561 | A | 0 | 0      | G |
| 6 | BICF2G630569973        | 80034349 | G | 0 | 0      | A |
| 6 | BICF2G630569932        | 80049347 | C | 0 | 0      | A |
| 6 | BICF2G630569913        | 80052507 | A | 1 | 1      | G |
| 6 | BICF2G630569896        | 80064278 | A | 0 | 0      | G |
| 6 | BICF2G630569895        | 80064431 | A | 0 | 0      | G |
| 6 | BICF2G630569866        | 80074594 | A | 0 | 0      | G |
| 6 | BICF2G630569848        | 80086981 | C | 0 | 0      | G |
| 6 | BICF2G630569781        | 80107118 | C | 0 | 0      | A |
| 6 | BICF2G630569767        | 80110074 | A | 0 | 0      | G |
| 6 | BICF2G630569762        | 80125519 | A | 0 | 0      | C |
| 6 | BICF2G630569745        | 80136261 | A | 0 | 0      | G |
| 6 | TIGRP2P90441_rs9108911 | 80150708 | A | 0 | 0      | G |
| 6 | BICF2P549043           | 80163639 | A | 0 | 0      | G |
| 6 | BICF2P954715           | 80170583 | 0 | 0 | 0      | A |
| 6 | BICF2G630569630        | 80181529 | C | 1 | 0.7143 | G |
| 6 | BICF2P809231           | 80192882 | 0 | 0 | 0      | G |
| 6 | TIGRP2P90492_rs8889669 | 80202011 | C | 0 | 0.25   | A |
| 6 | BICF2P1224444          | 80215967 | A | 0 | 0      | G |
| 6 | BICF2G630569509        | 80216255 | G | 0 | 0.2857 | A |
| 6 | BICF2S22961359         | 80235158 | G | 1 | 1      | A |
| 6 | BICF2G630569466        | 80236663 | G | 0 | 0      | A |
| 6 | BICF2P1337653          | 80258425 | G | 0 | 0      | A |
| 6 | BICF2P1325660          | 80263908 | G | 0 | 0.2857 | A |
| 6 | BICF2G630569435        | 80266066 | A | 0 | 0      | G |
| 6 | TIGRP2P90534_rs8846113 | 80276383 | G | 1 | 1      | A |
| 6 | BICF2P1469956          | 80293811 | A | 1 | 0.7143 | G |
| 6 | BICF2P1228141          | 80306453 | A | 1 | 1      | G |
| 6 | TIGRP2P90570_rs9017915 | 80322245 | A | 0 | 0.2857 | G |

|   |                         |          |   |    |        |    |
|---|-------------------------|----------|---|----|--------|----|
| 6 | BICF2G630569422         | 80329910 | A | 0  | 0.2857 | G  |
| 6 | TIGRP2P90594_rs9046282  | 80342637 | C | 0  | 0.2857 | A  |
| 6 | BICF2G630569364         | 80352567 | G | 0  | 0      | A  |
| 6 | BICF2G630569331         | 80360330 | A | 1  | 1      | G  |
| 6 | BICF2G630569329         | 80362700 | A | 1  | 1      | G  |
| 6 | BICF2S23146068          | 80378136 | A | 0  | 0      | G  |
| 6 | BICF2G630569299         | 80390760 | G | 0  | 0      | A  |
| 6 | BICF2G630569296         | 80391056 | G | 0  | 0      | A  |
| 6 | BICF2P813737            | 80428081 | 0 | 0  | 0      | A  |
| 6 | BICF2G630569263         | 80442009 | A | 0  | 0      | G  |
| 6 | TIGRP2P90646_rs9044326  | 80446432 | A | 0  | 0      | C  |
| 6 | BICF2G630569243         | 80458945 | G | 0  | 0      | A  |
| 6 | BICF2G630569238         | 80465917 | G | 0  | 0.2857 | A  |
| 6 | BICF2G630569224         | 80478466 | 0 | 0  | 0      | G  |
| 6 | BICF2G630569195         | 80496194 | G | 0  | 0      | A  |
| 6 | BICF2G630569149         | 80510494 | G | 1  | 0.7143 | A  |
| 6 | BICF2G630569118         | 80520221 | A | 0  | 0      | G  |
| 6 | BICF2G630569076         | 80531300 | G | 1  | 0.8    | A  |
| 6 | BICF2P329604            | 80539636 | G | 1  | 0.7143 | A  |
| 6 | BICF2P1348382           | 80546112 | 0 | 0  | 0      | C  |
| 6 | BICF2G630569070         | 80558053 | G | 0  | 0.2857 | A  |
| 6 | BICF2S23726453          | 80582380 | A | 0  | 0.2857 | G  |
| 6 | BICF2P1088577           | 80601423 | G | 0  | 0      | A  |
| 6 | BICF2P1370303           | 80608513 | 0 | 0  | 0      | A  |
| 6 | BICF2P223115            | 80621071 | C | 0  | 0      | A  |
| 6 | TIGRP2P90680_rs8450920  | 80639060 | 0 | 0  | 0      | G  |
| 9 | BICF2P309837            | 3003393  | 0 | NA | NA     | NA |
| 9 | BICF2P1444473           | 3013641  | G | 0  | 0      | A  |
| 9 | BICF2P132632            | 3027208  | A | 0  | 0      | G  |
| 9 | BICF2S23741434          | 3043254  | A | 0  | 0      | C  |
| 9 | BICF2P1397556           | 3054369  | 0 | 0  | 0      | C  |
| 9 | BICF2S23733311          | 3080156  | A | 0  | 0      | G  |
| 9 | BICF2P830234            | 3082799  | 0 | 0  | 0      | A  |
| 9 | TIGRP2P244850_rs8950347 | 3100030  | G | 0  | 0      | A  |
| 9 | TIGRP2P244847_rs9239061 | 3106843  | G | 0  | 0      | A  |
| 9 | TIGRP2P244844_rs9253216 | 3125432  | A | 0  | 0      | G  |
| 9 | BICF2P1237427           | 3131299  | G | 0  | 0      | A  |
| 9 | TIGRP2P244841_rs8989099 | 3141597  | G | 0  | 0      | A  |
| 9 | BICF2S22942334          | 3154536  | G | 0  | 0      | A  |
| 9 | BICF2P554683            | 3167765  | G | 0  | 0      | A  |
| 9 | BICF2S23340023          | 3183571  | G | 0  | 0      | C  |
| 9 | BICF2S23354403          | 3210246  | G | 0  | 0      | A  |
| 9 | BICF2P110834            | 3225499  | A | 0  | 0      | G  |
| 9 | BICF2P794118            | 3240903  | 0 | 0  | 0      | G  |
| 9 | BICF2P840357            | 3245548  | 0 | 0  | 0      | C  |
| 9 | BICF2P194139            | 3275563  | A | 0  | 0      | G  |
| 9 | BICF2P72435             | 3280976  | G | 0  | 0      | A  |

|   |                         |         |   |   |        |   |
|---|-------------------------|---------|---|---|--------|---|
| 9 | BICF2P958180            | 3299230 | G | 0 | 0      | A |
| 9 | BICF2P1060077           | 3321882 | 0 | 0 | 0      | G |
| 9 | BICF2P841099            | 3329060 | C | 0 | 0      | A |
| 9 | TIGRP2P244817_rs8572936 | 3351660 | 0 | 0 | 0      | C |
| 9 | BICF2S23030432          | 3378703 | G | 0 | 0      | A |
| 9 | BICF2P286006            | 3381125 | 0 | 0 | 0      | A |
| 9 | TIGRP2P244815_rs8774266 | 3403240 | 0 | 0 | 0      | G |
| 9 | BICF2S23244057          | 3425707 | G | 0 | 0      | A |
| 9 | BICF2P969948            | 3430398 | G | 0 | 0      | A |
| 9 | BICF2P138811            | 3445601 | G | 0 | 0      | A |
| 9 | BICF2P701114            | 3479656 | 0 | 0 | 0      | C |
| 9 | BICF2P684091            | 3485210 | G | 0 | 0      | A |
| 9 | BICF2S23441614          | 3496412 | G | 0 | 0      | A |
| 9 | TIGRP2P244803_rs8968860 | 3515526 | A | 0 | 0      | G |
| 9 | BICF2P399249            | 3529583 | 0 | 0 | 0      | G |
| 9 | BICF2S23638127          | 3532061 | A | 0 | 0      | G |
| 9 | BICF2S23032400          | 3560551 | A | 0 | 0      | G |
| 9 | BICF2P442254            | 3572341 | A | 0 | 0      | G |
| 9 | TIGRP2P244789_rs9150379 | 3587572 | A | 0 | 0      | G |
| 9 | BICF2P1272565           | 3605267 | G | 0 | 0      | A |
| 9 | BICF2P347394            | 3619830 | G | 0 | 0      | A |
| 9 | BICF2P59325             | 3630867 | 0 | 0 | 0      | G |
| 9 | BICF2S23232063          | 3649331 | A | 0 | 0      | G |
| 9 | TIGRP2P244749_rs9186811 | 3688990 | G | 0 | 0      | A |
| 9 | BICF2S23522744          | 3696216 | G | 0 | 0      | A |
| 9 | BICF2P1270062           | 3712133 | G | 0 | 0.2857 | A |
| 9 | TIGRP2P244745_rs9188376 | 3721827 | A | 0 | 0      | G |
| 9 | BICF2P1347921           | 3736513 | G | 0 | 0.2857 | A |
| 9 | BICF2P268406            | 3742838 | A | 0 | 0      | G |
| 9 | BICF2P136294            | 3757431 | G | 0 | 0.2857 | A |
| 9 | BICF2S2369091           | 3769127 | A | 0 | 0      | G |
| 9 | BICF2P448454            | 3778324 | G | 0 | 0.2857 | A |
| 9 | BICF2P1188322           | 3784861 | 0 | 0 | 0      | A |
| 9 | BICF2P1224586           | 3804938 | A | 0 | 0.2857 | G |
| 9 | BICF2P233220            | 3816341 | G | 0 | 0.2857 | C |
| 9 | BICF2P157033            | 3823030 | A | 0 | 0.2857 | C |
| 9 | BICF2P268912            | 3832098 | G | 0 | 0.2857 | A |
| 9 | BICF2P605513            | 3839816 | A | 0 | 0      | G |
| 9 | BICF2P1320606           | 3841631 | G | 0 | 0.2857 | A |
| 9 | BICF2P1206077           | 3873847 | G | 0 | 0      | A |
| 9 | BICF2P616658            | 3875656 | A | 0 | 0      | G |
| 9 | TIGRP2P244726_rs8678790 | 3898318 | 0 | 0 | 0      | C |
| 9 | BICF2P801989            | 3905549 | A | 0 | 0      | G |
| 9 | BICF2P70804             | 3915649 | A | 0 | 0      | G |
| 9 | BICF2P1036569           | 3924413 | A | 0 | 0      | G |
| 9 | BICF2P683447            | 3938471 | 0 | 0 | 0      | G |
| 9 | BICF2P295598            | 3953212 | G | 0 | 0      | A |

|   |                         |         |   |      |        |   |
|---|-------------------------|---------|---|------|--------|---|
| 9 | BICF2P1460864           | 3966228 | A | 0    | 0      | G |
| 9 | BICF2P173550            | 3969432 | G | 0    | 0      | C |
| 9 | TIGRP2P244718_rs8924886 | 3986916 | 0 | 0    | 0      | G |
| 9 | BICF2P213155            | 4011385 | C | 0    | 0      | A |
| 9 | BICF2P164422            | 4014078 | A | 0    | 0      | C |
| 9 | BICF2P95254             | 4030521 | G | 0    | 0      | A |
| 9 | BICF2S23128734          | 4059047 | A | 0    | 0      | C |
| 9 | BICF2S2319928           | 4078769 | A | 0    | 0      | G |
| 9 | TIGRP2P244717_rs8844324 | 4109330 | 0 | 0    | 0      | G |
| 9 | BICF2S2301425           | 4125282 | G | 0    | 0      | A |
| 9 | BICF2P716522            | 4128865 | G | 0    | 0      | A |
| 9 | BICF2P1194613           | 4148948 | G | 0    | 0      | A |
| 9 | BICF2P2739              | 4165832 | A | 0    | 0      | C |
| 9 | BICF2P1055859           | 4177519 | A | 0.75 | 0.3571 | G |
| 9 | BICF2P256734            | 4187195 | A | 0.75 | 0.3571 | G |
| 9 | BICF2P627887            | 4197730 | A | 0.25 | 0.6429 | G |
| 9 | TIGRP2P244711_rs8949157 | 4213366 | 0 | 0    | 0      | C |
| 9 | BICF2P520294            | 4230004 | A | 0.25 | 0.6429 | G |
| 9 | BICF2P259807            | 4240274 | A | 0.75 | 0.3571 | C |
| 9 | BICF2P103448            | 4248260 | C | 0.75 | 0.3571 | A |
| 9 | BICF2P1059543           | 4263260 | A | 0.25 | 0.6429 | G |
| 9 | BICF2P1303684           | 4272356 | A | 0.75 | 0.3571 | C |
| 9 | BICF2P1199338           | 4289779 | A | 0.75 | 0.3571 | G |
| 9 | BICF2P831138            | 4304182 | A | 0.75 | 0.3571 | G |
| 9 | BICF2P234941            | 4322043 | A | 0.25 | 0.3571 | C |
| 9 | BICF2P899484            | 4325620 | A | 1    | 0.3571 | C |
| 9 | BICF2P427807            | 4338705 | A | 0.75 | 0.3571 | G |
| 9 | BICF2P749895            | 4347640 | A | 0.75 | 0.3571 | G |
| 9 | BICF2P184132            | 4363516 | 0 | 0    | 0      | A |
| 9 | BICF2P226103            | 4390582 | A | 0.25 | 0.3571 | G |
| 9 | BICF2P324692            | 4402765 | A | 0.25 | 0.3571 | G |
| 9 | BICF2P744273            | 4436023 | A | 0.25 | 0.3571 | G |
| 9 | BICF2P965193            | 4444004 | A | 0.75 | 0.3571 | G |
| 9 | BICF2P965192            | 4444114 | A | 0.75 | 0.3571 | G |
| 9 | BICF2P119329            | 4462345 | A | 0.25 | 0.3571 | G |
| 9 | BICF2P922847            | 4473756 | A | 0.25 | 0.3571 | G |
| 9 | BICF2P1317072           | 4496926 | G | 0.75 | 0.6429 | A |
| 9 | BICF2P1390768           | 4512376 | A | 0.25 | 0.3571 | G |
| 9 | BICF2P155230            | 4522141 | A | 0    | 0      | G |
| 9 | BICF2P627209            | 4536272 | G | 0    | 0      | A |
| 9 | TIGRP2P244704_rs8952541 | 4553045 | 0 | 0    | 0      | G |
| 9 | BICF2P691118            | 4561259 | 0 | 0    | 0      | A |
| 9 | BICF2P184113            | 4566379 | A | 0    | 0.3571 | G |
| 9 | BICF2P250163            | 4588715 | 0 | 0    | 0      | C |
| 9 | BICF2P820938            | 4603201 | A | 0    | 0      | G |
| 9 | BICF2P1056783           | 4636012 | A | 0.25 | 0.3571 | G |
| 9 | BICF2P1179388           | 4658226 | C | 1    | 0.8333 | A |



|   |                         |         |   |      |        |   |
|---|-------------------------|---------|---|------|--------|---|
| 9 | BICF2P1072538           | 4674228 | A | 0    | 0.3333 | G |
| 9 | BICF2P1072474           | 4689128 | A | 0.25 | 0.3333 | G |
| 9 | BICF2P1444921           | 4705912 | A | 0    | 0.3571 | G |
| 9 | BICF2P735856            | 4715091 | A | 0.75 | 0.6429 | G |
| 9 | BICF2P1214913           | 4726767 | A | 0.25 | 0.3571 | G |
| 9 | BICF2P1267051           | 4768338 | 0 | 0    | 0      | A |
| 9 | BICF2P169431            | 4795182 | 0 | 0    | 0      | C |
| 9 | BICF2P1193661           | 4798507 | C | 0.75 | 0.6429 | G |
| 9 | BICF2P996727            | 4807590 | G | 0.75 | 0.6429 | A |
| 9 | BICF2P487612            | 4822035 | A | 0.75 | 0.6667 | G |
| 9 | BICF2P223820            | 4836906 | 0 | 0    | 0      | G |
| 9 | BICF2P224432            | 4845027 | A | 0    | 0      | G |
| 9 | BICF2P1209975           | 4858418 | G | 1    | 1      | A |
| 9 | BICF2P1247278           | 4865944 | A | 1    | 1      | G |
| 9 | BICF2P1300027           | 4883060 | A | 1    | 1      | G |
| 9 | BICF2P1347247           | 4899862 | G | 1    | 1      | A |
| 9 | BICF2P852486            | 4943755 | G | 1    | 1      | A |
| 9 | BICF2P771286            | 4946089 | A | 1    | 1      | G |
| 9 | BICF2P673827            | 4977665 | A | 1    | 1      | G |
| 9 | BICF2S23426543          | 4997475 | G | 1    | 1      | A |
| 9 | BICF2P563223            | 5024537 | A | 1    | 1      | G |
| 9 | BICF2P1200528           | 5044124 | C | 1    | 1      | G |
| 9 | BICF2P857977            | 5062201 | G | 1    | 1      | A |
| 9 | BICF2P96019             | 5080936 | G | 1    | 1      | A |
| 9 | BICF2S22937780          | 5112797 | A | 1    | 1      | G |
| 9 | BICF2P864531            | 5124088 | A | 1    | 0.7143 | G |
| 9 | BICF2P1150673           | 5130129 | A | 0    | 0.25   | G |
| 9 | BICF2P408847            | 5141573 | A | 1    | 1      | G |
| 9 | BICF2P869571            | 5177026 | G | 1    | 1      | A |
| 9 | BICF2P804906            | 5195258 | G | 1    | 1      | A |
| 9 | BICF2P872141            | 5200958 | A | 1    | 1      | G |
| 9 | BICF2P1416153           | 5204985 | C | 1    | 1      | A |
| 9 | BICF2P1132001           | 5233847 | A | 1    | 1      | G |
| 9 | BICF2P1183694           | 5248473 | A | 1    | 1      | G |
| 9 | BICF2P463719            | 5258778 | A | 0    | 0      | G |
| 9 | BICF2P267469            | 5271171 | G | 1    | 1      | A |
| 9 | BICF2S23645081          | 5285445 | A | 1    | 1      | G |
| 9 | BICF2P1385899           | 5299287 | G | 1    | 1      | A |
| 9 | BICF2P1350420           | 5306932 | G | 1    | 1      | A |
| 9 | BICF2P554565            | 5323129 | G | 0    | 0      | A |
| 9 | BICF2P195421            | 5324996 | G | 0    | 0      | A |
| 9 | BICF2P1188376           | 5343955 | G | 0    | 0      | A |
| 9 | BICF2P656660            | 5357579 | 0 | 0    | 0      | C |
| 9 | BICF2P1325828           | 5360416 | A | 1    | 1      | G |
| 9 | BICF2P528414            | 5379266 | A | 0    | 0      | G |
| 9 | BICF2S23542688          | 5418477 | A | 0    | 0      | C |
| 9 | TIGRP2P244687_rs9056937 | 5433293 | 0 | 0    | 0      | G |

|   |                         |         |   |      |        |   |
|---|-------------------------|---------|---|------|--------|---|
| 9 | TIGRP2P244686_rs9009094 | 5440910 | 0 | 0    | 0      | C |
| 9 | TIGRP2P244684_rs9092387 | 5459287 | 0 | 0    | 0      | G |
| 9 | BICF2P494704            | 5484443 | 0 | 0    | 0      | A |
| 9 | BICF2P1221332           | 5492178 | 0 | 0    | 0      | T |
| 9 | BICF2P852723            | 5510716 | 0 | 0    | 0      | G |
| 9 | TIGRP2P244683_rs8522195 | 5524660 | 0 | 0    | 0      | C |
| 9 | BICF2P1296339           | 5533847 | A | 0    | 0.2857 | G |
| 9 | BICF2S2316668           | 5578646 | A | 1    | 0.7143 | G |
| 9 | BICF2P939527            | 5595094 | A | 1    | 0.7143 | G |
| 9 | BICF2P31454             | 5602570 | G | 1    | 0.7143 | A |
| 9 | BICF2S23529960          | 5629690 | G | 1    | 0.7143 | A |
| 9 | TIGRP2P244677_rs8888207 | 5636449 | 0 | 0    | 0      | C |
| 9 | BICF2P728294            | 5649783 | G | 0    | 0      | C |
| 9 | BICF2P1313720           | 5658065 | G | 1    | 0.7143 | A |
| 9 | BICF2P1194003           | 5675117 | C | 0.25 | 0.3571 | G |
| 9 | BICF2P611764            | 5698719 | A | 0    | 0      | G |
| 9 | BICF2P1260537           | 5716798 | G | 1    | 0.7143 | A |
| 9 | BICF2P207992            | 5741115 | 0 | 0    | 0      | G |
| 9 | BICF2S23544437          | 5759628 | A | 0    | 0      | G |
| 9 | BICF2P904399            | 5767271 | A | 0    | 0      | G |
| 9 | BICF2P526583            | 5782703 | C | 0    | 0      | A |
| 9 | TIGRP2P244671_rs8725181 | 5816952 | 0 | 0    | 0      | C |
| 9 | TIGRP2P244670_rs8988033 | 5825638 | 0 | 0    | 0      | T |
| 9 | BICF2P456937            | 5845522 | 0 | 0    | 0      | G |
| 9 | BICF2P889625            | 5853780 | G | 0    | 0      | A |
| 9 | BICF2P966162            | 5901616 | C | 0    | 0      | A |
| 9 | BICF2P304540            | 5911404 | A | 0.25 | 0.3571 | G |
| 9 | BICF2P836857            | 5928592 | A | 0    | 0      | G |
| 9 | BICF2P140759            | 5944905 | G | 0.25 | 0.3571 | A |
| 9 | BICF2P1392759           | 5959030 | A | 1    | 0.7143 | G |
| 9 | BICF2P622301            | 5984381 | G | 1    | 0.7143 | A |
| 9 | BICF2P855323            | 5992385 | G | 1    | 0.7143 | A |
| 9 | BICF2S22910807          | 6009257 | A | 1    | 0.7143 | G |
| 9 | BICF2P1294857           | 6022410 | G | 1    | 0.7143 | A |
| 9 | BICF2P945314            | 6030133 | C | 1    | 0.7143 | A |
| 9 | BICF2P377014            | 6044667 | A | 1    | 0.7143 | G |
| 9 | BICF2P394340            | 6052783 | A | 1    | 0.7143 | G |
| 9 | BICF2S22943430          | 6061889 | A | 1    | 0.75   | G |
| 9 | BICF2S22913460          | 6072373 | G | 1    | 0.7143 | A |
| 9 | BICF2S23413605          | 6085552 | G | 1    | 0.7143 | A |
| 9 | BICF2P953611            | 6099107 | G | 1    | 0.7143 | A |
| 9 | BICF2P186704            | 6110568 | A | 1    | 0.7143 | G |
| 9 | BICF2P1127873           | 6132381 | 0 | 0    | 0      | G |
| 9 | BICF2S23512153          | 6149205 | G | 1    | 0.7143 | A |
| 9 | BICF2P978767            | 6161782 | A | 0.25 | 0.3571 | G |
| 9 | BICF2P256046            | 6185084 | G | 1    | 0.7143 | A |
| 9 | TIGRP2P244661_rs9243072 | 6217483 | 0 | 0    | 0      | C |

|   |                         |         |   |      |        |   |
|---|-------------------------|---------|---|------|--------|---|
| 9 | BICF2P71116             | 6232762 | G | 1    | 0.7143 | A |
| 9 | BICF2P414122            | 6243813 | A | 1    | 0.7143 | G |
| 9 | BICF2P1228201           | 6250500 | G | 1    | 0.7143 | A |
| 9 | BICF2P72714             | 6263917 | A | 0.75 | 0.3571 | G |
| 9 | BICF2P1080530           | 6276407 | G | 1    | 0.7143 | A |
| 9 | BICF2P1205920           | 6287948 | A | 0    | 0.3333 | G |
| 9 | BICF2P810872            | 6295173 | C | 0.25 | 0.3571 | A |
| 9 | BICF2P1277084           | 6321732 | A | 0.25 | 0.3571 | G |
| 9 | BICF2P393194            | 6325224 | A | 1    | 0.7143 | C |
| 9 | BICF2P1262435           | 6347039 | G | 1    | 0.7143 | A |
| 9 | BICF2P1262453           | 6348724 | G | 1    | 0.7143 | A |
| 9 | BICF2P1249203           | 6366494 | G | 1    | 0.7143 | A |
| 9 | BICF2P1360950           | 6376684 | A | 1    | 0.7143 | G |
| 9 | BICF2S22945525          | 6382596 | A | 1    | 0.7143 | G |
| 9 | BICF2S23626446          | 6406006 | 0 | 0    | 0      | A |
| 9 | BICF2P121771            | 6417009 | A | 0    | 0      | G |
| 9 | BICF2P141355            | 6446459 | A | 0.25 | 0.3571 | C |
| 9 | BICF2S2371747           | 6454842 | G | 0.25 | 0.3571 | A |
| 9 | BICF2S2306423           | 6458145 | G | 0.25 | 0.3571 | A |
| 9 | BICF2P297297            | 6468770 | A | 0.25 | 0.3571 | G |
| 9 | BICF2S23248780          | 6487472 | G | 0    | 0      | C |
| 9 | BICF2P470586            | 6500333 | A | 0.25 | 0.3571 | G |
| 9 | BICF2S22917678          | 6514707 | A | 0.25 | 0.3571 | G |
| 9 | TIGRP2P244630_rs8860448 | 6525894 | A | 0.25 | 0.3571 | G |
| 9 | BICF2P935843            | 6547923 | A | 0.75 | 0.3571 | C |
| 9 | BICF2S2376938           | 6563089 | G | 1    | 0.7143 | C |
| 9 | BICF2P198850            | 6567056 | 0 | 0    | 0      | G |
| 9 | BICF2P439040            | 6587949 | A | 0.25 | 0.3571 | G |
| 9 | BICF2P896646            | 6594891 | G | 0.25 | 0.3571 | A |
| 9 | TIGRP2P244614_rs8946181 | 6614677 | G | 1    | 1      | A |
| 9 | BICF2P1370930           | 6633689 | A | 0    | 0      | G |
| 9 | BICF2P940041            | 6653789 | G | 0    | 0.6429 | A |
| 9 | BICF2P382223            | 6667156 | 0 | 0    | 0      | G |
| 9 | BICF2S24312404          | 6677751 | G | 0    | 0.2857 | A |
| 9 | BICF2P116234            | 6687854 | 0 | 0    | 0      | A |
| 9 | BICF2P141709            | 6695493 | 0 | 0    | 0      | G |
| 9 | BICF2S23541884          | 6732872 | A | 0    | 0.2857 | G |
| 9 | BICF2S2346403           | 6789895 | A | 0    | 0.2857 | G |
| 9 | BICF2P368167            | 6837703 | A | 0    | 0      | G |
| 9 | BICF2P241722            | 6848680 | A | 0    | 0      | G |
| 9 | BICF2P1354324           | 6876692 | A | 0    | 0      | G |
| 9 | BICF2P515988            | 6878982 | G | 0    | 0      | A |
| 9 | BICF2P824003            | 6908882 | G | 0    | 0      | A |
| 9 | BICF2S2369345           | 6923651 | A | 1    | 0.875  | C |
| 9 | BICF2P1124396           | 6941577 | 0 | 0    | 0      | C |
| 9 | BICF2P669255            | 6991759 | 0 | 0    | 0      | A |
| 9 | G536f30S68              | 7013238 | C | 1    | 0.7143 | G |

|   |                         |         |   |      |        |   |
|---|-------------------------|---------|---|------|--------|---|
| 9 | BICF2P1174471           | 7040145 | 0 | 0    | 0      | G |
| 9 | BICF2P157561            | 7066516 | 0 | 0    | 0      | T |
| 9 | BICF2P154738            | 7085971 | G | 0    | 0      | A |
| 9 | BICF2P729876            | 7103950 | 0 | 0    | 0      | G |
| 9 | BICF2P1186188           | 7110867 | 0 | 0    | 0      | A |
| 9 | BICF2P1219682           | 7139903 | 0 | 0    | 0      | G |
| 9 | BICF2P710431            | 7166748 | G | 0.25 | 0.3333 | A |
| 9 | TIGRP2P244559_rs8950703 | 7202963 | 0 | 0    | 0      | G |
| 9 | BICF2P513201            | 7221808 | A | 1    | 0.7143 | G |
| 9 | BICF2P1221538           | 7230119 | A | 0.25 | 0.3571 | G |
| 9 | BICF2P538387            | 7235627 | A | 0.25 | 0.3571 | G |
| 9 | BICF2P668766            | 7240846 | C | 0.25 | 0.3571 | A |
| 9 | BICF2P928888            | 7253654 | 0 | 0    | 0      | G |
| 9 | BICF2P558685            | 7263326 | A | 0.25 | 0.6429 | G |
| 9 | BICF2P19222             | 7268964 | A | 0.25 | 0.6429 | G |
| 9 | BICF2P662701            | 7282996 | G | 0.25 | 0.6429 | A |
| 9 | BICF2P447753            | 7306156 | G | 0.25 | 0.6429 | A |
| 9 | BICF2P1348152           | 7318939 | A | 0.25 | 0.3571 | G |
| 9 | BICF2S23138713          | 7331616 | G | 0    | 0.2857 | A |
| 9 | BICF2P819101            | 7359959 | A | 0.25 | 0.3571 | G |
| 9 | BICF2P398943            | 7369340 | 0 | 0    | 0      | A |
| 9 | BICF2S23257313          | 7387061 | G | 0    | 0.2857 | A |
| 9 | BICF2P638023            | 7398271 | G | 0.75 | 0.3333 | A |
| 9 | BICF2P465233            | 7413021 | 0 | 0    | 0      | A |
| 9 | BICF2P703333            | 7428533 | A | 0.75 | 0.3    | G |
| 9 | BICF2P1069150           | 7432781 | G | 0.25 | 0.3571 | A |
| 9 | BICF2P1071003           | 7486678 | A | 0    | 0      | G |
| 9 | BICF2P817756            | 7527606 | A | 1    | 0.7143 | G |
| 9 | BICF2S23231067          | 7546270 | A | 0    | 0      | G |
| 9 | BICF2P991630            | 7557388 | 0 | 0    | 0      | G |
| 9 | BICF2P1259319           | 7607760 | A | 0    | 0      | G |
| 9 | BICF2P256822            | 7616531 | A | 0    | 0      | G |
| 9 | BICF2P1363582           | 7646478 | A | 0    | 0      | G |
| 9 | BICF2P351474            | 7656919 | C | 0    | 0      | A |
| 9 | BICF2S23228452          | 7660265 | C | 0.25 | 0.3571 | A |
| 9 | BICF2P502725            | 7706900 | A | 0    | 0.2857 | G |
| 9 | BICF2P405024            | 7740690 | A | 0    | 0      | C |
| 9 | BICF2P798232            | 7749901 | A | 0    | 0      | G |
| 9 | BICF2P1248308           | 7761269 | A | 0.25 | 0.6429 | G |
| 9 | BICF2P1254128           | 7771846 | 0 | 0    | 0      | G |
| 9 | BICF2P400944            | 7780879 | 0 | 0    | 0      | G |
| 9 | BICF2P5055              | 7795848 | 0 | 0    | 0      | A |
| 9 | BICF2P791305            | 7797572 | 0 | 0    | 0      | G |
| 9 | BICF2P1157774           | 7809290 | 0 | 0    | 0      | A |
| 9 | TIGRP2P244548_rs9155085 | 7827755 | 0 | 0    | 0      | G |
| 9 | BICF2S235394            | 7842960 | G | 0    | 0      | A |
| 9 | BICF2P92535             | 7849130 | A | 0    | 0      | G |

|   |                         |         |   |      |        |   |
|---|-------------------------|---------|---|------|--------|---|
| 9 | BICF2P1399341           | 7856753 | G | 0    | 0      | A |
| 9 | BICF2P421408            | 7866889 | C | 0    | 0      | G |
| 9 | BICF2P792643            | 7877238 | G | 0    | 0      | A |
| 9 | BICF2S23237942          | 7878750 | A | 0    | 0      | C |
| 9 | BICF2P185590            | 7890288 | G | 0    | 0      | A |
| 9 | BICF2P266426            | 7910870 | A | 0    | 0      | C |
| 9 | BICF2P811478            | 7921784 | A | 0    | 0      | G |
| 9 | BICF2S23253303          | 7933094 | A | 0    | 0      | G |
| 9 | BICF2S23246968          | 7936804 | A | 0    | 0      | G |
| 9 | BICF2S23749849          | 7955062 | A | 0    | 0      | G |
| 9 | BICF2P544809            | 7961259 | G | 1    | 1      | A |
| 9 | BICF2P842963            | 7977677 | A | 1    | 1      | G |
| 9 | BICF2S23123114          | 7989771 | G | 0    | 0.2857 | A |
| 9 | BICF2P1146417           | 7995172 | 0 | 0    | 0      | G |
| 9 | BICF2S23413192          | 8025763 | A | 0    | 0.2857 | G |
| 9 | BICF2S23241212          | 8051619 | G | 0    | 0      | A |
| 9 | BICF2P921631            | 8116977 | 0 | 0    | 0      | A |
| 9 | BICF2S23541863          | 8132931 | A | 0    | 0.2857 | G |
| 9 | BICF2P392700            | 8169640 | G | 1    | 0.7143 | A |
| 9 | BICF2S23414459          | 8179290 | A | 1    | 0.7143 | G |
| 9 | BICF2S23113017          | 8188410 | A | 0    | 0      | G |
| 9 | BICF2P321941            | 8202822 | G | 0.75 | 0.6429 | A |
| 9 | BICF2P731229            | 8218637 | C | 0.75 | 0.6429 | A |
| 9 | BICF2P575283            | 8227319 | A | 0    | 0      | G |
| 9 | BICF2P1183309           | 8238053 | A | 0    | 0      | G |
| 9 | BICF2P245252            | 8263008 | 0 | 0    | 0      | A |
| 9 | BICF2S23316992          | 8289711 | G | 0.75 | 0.6429 | A |
| 9 | BICF2S23537746          | 8296622 | G | 0    | 0      | A |
| 9 | BICF2P276094            | 8309417 | 0 | 0    | 0      | G |
| 9 | BICF2P856386            | 8366381 | G | 0    | 0      | A |
| 9 | BICF2P1115290           | 8387885 | A | 0    | 0      | T |
| 9 | BICF2P813271            | 8400741 | C | 0.75 | 0.3571 | A |
| 9 | BICF2P375591            | 8426431 | A | 0.75 | 0.3571 | G |
| 9 | BICF2P979767            | 8435625 | G | 0    | 0      | A |
| 9 | BICF2P1316318           | 8456132 | G | 0    | 0      | A |
| 9 | BICF2P45969             | 8468416 | 0 | 0    | 0      | G |
| 9 | TIGRP2P244501_rs8911449 | 8476716 | G | 1    | 0.7143 | A |
| 9 | TIGRP2P244495_rs9188088 | 8497276 | A | 1    | 0.7143 | G |
| 9 | BICF2P1349021           | 8502759 | A | 0.75 | 0.3571 | G |
| 9 | BICF2P521103            | 8519991 | A | 0    | 0      | G |
| 9 | BICF2S2324840           | 8521556 | G | 0    | 0      | A |
| 9 | BICF2P28358             | 8541186 | A | 0.25 | 0.6429 | G |
| 9 | BICF2P1337346           | 8550804 | A | 0    | 0.2857 | G |
| 9 | BICF2P1361804           | 8562589 | G | 0.25 | 0.6429 | A |
| 9 | BICF2P1160370           | 8571082 | G | 0    | 0      | A |
| 9 | BICF2P636332            | 8591522 | A | 0    | 0.2857 | G |
| 9 | BICF2P926324            | 8633413 | 0 | 0    | 0      | G |

|   |                         |         |   |      |        |   |
|---|-------------------------|---------|---|------|--------|---|
| 9 | TIGRP2P244432_rs8600181 | 8641341 | A | 0    | 0.2857 | G |
| 9 | BICF2S2335305           | 8692157 | A | 0    | 0      | C |
| 9 | BICF2G630514210         | 8710809 | 0 | 0    | 0      | A |
| 9 | BICF2S23748085          | 8717858 | A | 0    | 0      | G |
| 9 | BICF2P929776            | 8731380 | G | 0    | 0.2857 | A |
| 9 | BICF2S23633834          | 8750365 | A | 0    | 0.2857 | G |
| 9 | BICF2S23548695          | 8751749 | C | 0    | 0      | A |
| 9 | TIGRP2P244384_rs8620813 | 8767407 | G | 0    | 0.2857 | A |
| 9 | BICF2P1173052           | 8775229 | G | 0    | 0.2857 | A |
| 9 | TIGRP2P244374_rs8830379 | 8789024 | C | 1    | 1      | A |
| 9 | BICF2S23028001          | 8789349 | A | 1    | 0.7143 | G |
| 9 | BICF2S2372734           | 8804096 | A | 0    | 0      | G |
| 9 | BICF2P611733            | 8821605 | G | 0    | 0.2857 | A |
| 9 | BICF2P218127            | 8860558 | G | 1    | 1      | A |
| 9 | BICF2P715898            | 8881793 | A | 0    | 0.25   | G |
| 9 | TIGRP2P244225_rs9071880 | 8891074 | G | 1    | 1      | A |
| 9 | BICF2P1354705           | 8916877 | G | 1    | 0.7143 | A |
| 9 | BICF2P352724            | 8921084 | G | 1    | 1      | A |
| 9 | BICF2S22946443          | 8928511 | G | 0    | 0      | A |
| 9 | BICF2P437730            | 8941446 | G | 0    | 0      | A |
| 9 | BICF2P1235993           | 8954043 | A | 0.25 | 0.6429 | G |
| 9 | BICF2S2347189           | 8958780 | G | 0.25 | 0.6429 | A |
| 9 | BICF2P1055455           | 8975617 | C | 0.75 | 0.3571 | A |
| 9 | BICF2P728609            | 9003244 | A | 0    | 0      | G |
| 9 | BICF2P1032377           | 9011074 | 0 | 0    | 0      | A |
| 9 | BICF2S23419353          | 9017842 | A | 0.75 | 0.6429 | G |
| 9 | BICF2P13314             | 9037260 | A | 0.75 | 0.6429 | G |
| 9 | BICF2P891181            | 9051582 | 0 | 0    | 0      | C |
| 9 | BICF2P626187            | 9062013 | A | 0    | 0      | G |
| 9 | TIGRP2P244173_rs8752743 | 9075222 | 0 | 0    | 0      | G |
| 9 | TIGRP2P244160_rs8529979 | 9086680 | A | 0.75 | 0.3571 | G |
| 9 | BICF2P777844            | 9097312 | G | 0    | 0      | A |
| 9 | BICF2P962490            | 9108563 | G | 0    | 0      | A |
| 9 | BICF2S23643546          | 9123341 | 0 | 0    | 0      | G |
| 9 | BICF2S23243300          | 9133948 | A | 0    | 0      | G |
| 9 | BICF2P782               | 9146472 | A | 0.25 | 0.3571 | C |
| 9 | BICF2S22933128          | 9157981 | G | 1    | 1      | A |
| 9 | BICF2P320395            | 9178052 | A | 0.75 | 0.3571 | G |
| 9 | BICF2S23221624          | 9196645 | C | 0.25 | 0.6429 | A |
| 9 | BICF2P397747            | 9207371 | G | 0.25 | 0.6429 | A |
| 9 | BICF2S23621627          | 9227203 | A | 0    | 0      | G |
| 9 | BICF2P964746            | 9246801 | 0 | 0    | 0      | C |
| 9 | BICF2P99329             | 9258202 | A | 0    | 0      | G |
| 9 | BICF2S23045885          | 9274047 | A | 0    | 0      | C |
| 9 | BICF2S23146883          | 9287565 | G | 0.75 | 0.3571 | A |
| 9 | TIGRP2P244114_rs8944033 | 9309337 | C | 0.25 | 0.3571 | A |
| 9 | BICF2P656088            | 9321674 | A | 0.75 | 0.6429 | G |

|   |                         |         |   |      |        |   |
|---|-------------------------|---------|---|------|--------|---|
| 9 | BICF2P455637            | 9335475 | G | 0    | 0.2857 | A |
| 9 | BICF2S2357941           | 9338667 | G | 0    | 0.2857 | A |
| 9 | TIGRP2P244100_rs8584979 | 9352952 | G | 1    | 0.7143 | A |
| 9 | BICF2P610379            | 9362699 | A | 0    | 0      | G |
| 9 | TIGRP2P244070_rs9203066 | 9372692 | A | 0.25 | 0.3571 | G |
| 9 | BICF2P626535            | 9395979 | G | 0.75 | 0.6429 | A |
| 9 | TIGRP2P244045_rs8626775 | 9407065 | C | 0.75 | 0.6429 | A |
| 9 | BICF2P203661            | 9420705 | A | 0.75 | 0.6429 | G |
| 9 | BICF2P741904            | 9429200 | G | 0    | 0.2857 | A |
| 9 | BICF2P689752            | 9433961 | A | 0    | 0      | G |
| 9 | BICF2S23516497          | 9444922 | A | 0    | 0.5    | G |
| 9 | BICF2P727235            | 9453323 | A | 0.25 | 0.3571 | G |
| 9 | BICF2P165382            | 9464159 | A | 0    | 0.2857 | G |
| 9 | BICF2P280964            | 9467330 | A | 0    | 0      | C |
| 9 | BICF2S22955626          | 9478807 | A | 0    | 0      | C |
| 9 | BICF2S2319702           | 9489390 | A | 0    | 0      | C |
| 9 | BICF2P1250900           | 9511166 | 0 | 0    | 0      | G |
| 9 | BICF2P24946             | 9528527 | A | 0.75 | 0.6429 | G |
| 9 | BICF2P1090424           | 9539490 | C | 0    | 0      | A |
| 9 | TIGRP2P243987_rs8707593 | 9546502 | G | 0    | 0      | A |
| 9 | BICF2S23547735          | 9550154 | G | 0    | 0      | A |
| 9 | BICF2S23245057          | 9556816 | A | 0    | 0      | G |
| 9 | BICF2P423920            | 9570112 | A | 0    | 0      | G |
| 9 | BICF2P979406            | 9590495 | A | 0    | 0.2857 | G |
| 9 | BICF2P962122            | 9635676 | G | 0    | 0      | A |
| 9 | BICF2P668086            | 9641640 | G | 0    | 0      | A |
| 9 | BICF2P323560            | 9651202 | A | 0    | 0      | G |
| 9 | BICF2P1048929           | 9665631 | G | 0    | 0.2857 | A |
| 9 | TIGRP2P243943_rs8984949 | 9674101 | A | 0.25 | 0.3571 | G |
| 9 | BICF2P1386634           | 9683637 | A | 0    | 0      | G |
| 9 | BICF2P731720            | 9698571 | 0 | 0    | 0      | G |
| 9 | BICF2P818748            | 9707377 | G | 0    | 0.2857 | A |
| 9 | BICF2P37950             | 9721569 | A | 0.75 | 0.3571 | G |
| 9 | TIGRP2P243919_rs8829102 | 9740270 | G | 0.25 | 0.6429 | A |
| 9 | BICF2P635650            | 9746605 | A | 1    | 0.7143 | G |
| 9 | BICF2S2371174           | 9767940 | A | 0    | 0      | G |
| 9 | BICF2P279223            | 9780390 | A | 0    | 0.2857 | G |
| 9 | TIGRP2P243901_rs8638165 | 9793418 | G | 0    | 0.2857 | A |
| 9 | TIGRP2P243888_rs8839038 | 9807822 | A | 0.75 | 0.3333 | G |
| 9 | TIGRP2P243877_rs8690482 | 9813917 | A | 0.75 | 0.3571 | G |
| 9 | BICF2P685191            | 9821483 | A | 0.25 | 0.6429 | G |
| 9 | TIGRP2P243856_rs9245242 | 9848647 | G | 0    | 0      | A |
| 9 | BICF2S23414555          | 9864708 | G | 0    | 0.2857 | A |
| 9 | BICF2P456875            | 9873881 | G | 0    | 0      | A |
| 9 | TIGRP2P243843_rs8964028 | 9884753 | A | 0    | 0.2857 | G |
| 9 | BICF2P64870             | 9896168 | 0 | 0    | 0      | G |
| 9 | BICF2P887528            | 9924234 | 0 | 0    | 0      | G |

|   |                         |          |   |      |        |   |
|---|-------------------------|----------|---|------|--------|---|
| 9 | BICF2P536304            | 9929430  | G | 0.75 | 0.3571 | A |
| 9 | BICF2P1038107           | 9946607  | 0 | 0    | 0      | C |
| 9 | BICF2P701301            | 9952101  | A | 0    | 0      | G |
| 9 | BICF2S2327894           | 9967584  | A | 0    | 0      | G |
| 9 | BICF2P221975            | 9973892  | G | 0.25 | 0.3571 | A |
| 9 | BICF2P855850            | 10001350 | A | 0    | 0      | G |
| 9 | BICF2P349863            | 10009854 | 0 | 0    | 0      | C |
| 9 | BICF2P966011            | 10020630 | A | 0.25 | 0.3571 | G |
| 9 | BICF2P1239566           | 10030103 | A | 0.25 | 0.3571 | G |
| 9 | BICF2P1392893           | 10034878 | A | 0    | 0      | G |
| 9 | BICF2S23712029          | 10047459 | G | 0    | 0      | A |
| 9 | BICF2P436503            | 10052928 | C | 0    | 0      | G |
| 9 | BICF2S23741121          | 10071409 | C | 0.75 | 0.3571 | A |
| 9 | TIGRP2P243791_rs8982854 | 10081549 | A | 0.75 | 0.3571 | C |
| 9 | BICF2P750687            | 10093162 | A | 0.25 | 0.3571 | G |
| 9 | BICF2P381480            | 10097808 | A | 0    | 0.2857 | G |
| 9 | BICF2S23242393          | 10110199 | A | 0.75 | 0.3571 | G |
| 9 | BICF2P970233            | 10141068 | 0 | 0    | 0      | G |
| 9 | BICF2S23052466          | 10146281 | 0 | 0    | 0      | G |
| 9 | BICF2S23730374          | 10170617 | A | 0.25 | 0.6429 | G |
| 9 | BICF2S23719057          | 10182891 | G | 0.75 | 0.3571 | A |
| 9 | BICF2P925276            | 10193401 | A | 0.25 | 0.6429 | G |
| 9 | BICF2P879094            | 10202657 | G | 0    | 0      | A |
| 9 | BICF2S23732437          | 10218128 | A | 1    | 0.8    | C |
| 9 | BICF2P149841            | 10224327 | A | 0    | 0      | G |
| 9 | BICF2S2399369           | 10239350 | G | 0.75 | 0.6429 | A |
| 9 | BICF2S22910017          | 10257520 | A | 0    | 0      | G |
| 9 | BICF2P711993            | 10267084 | A | 0.75 | 0.6429 | G |
| 9 | BICF2P277127            | 10270761 | G | 1    | 0.6429 | A |
| 9 | BICF2P1297148           | 10312522 | 0 | 0    | 0      | A |
| 9 | TIGRP2P243747_rs8708523 | 10326003 | 0 | 0    | 0      | C |
| 9 | BICF2S23215671          | 10327677 | G | 0.75 | 0.6429 | A |
| 9 | BICF2S23153415          | 10343899 | A | 0    | 0      | G |
| 9 | BICF2S23349590          | 10361250 | G | 0    | 0      | A |
| 9 | BICF2S23134559          | 10383390 | A | 0    | 0      | G |
| 9 | BICF2P1160161           | 10385450 | A | 0.25 | 0.3571 | C |
| 9 | BICF2P1012878           | 10396165 | A | 0    | 0      | G |
| 9 | G538f3S225              | 10457477 | 0 | 0    | 0      | G |
| 9 | BICF2P772589            | 11016676 | A | 0.25 | 0.6429 | G |
| 9 | BICF2S22923671          | 11017587 | A | 0.5  | 0.2143 | G |
| 9 | BICF2P653614            | 11035711 | G | 0.5  | 0.2143 | A |
| 9 | BICF2P485955            | 11042919 | G | 0    | 0      | A |
| 9 | BICF2P180721            | 11058279 | A | 0.25 | 0.6429 | G |
| 9 | BICF2P546600            | 11060904 | G | 0    | 0      | A |
| 9 | BICF2S23126858          | 11073501 | A | 0.25 | 0.3571 | G |
| 9 | BICF2S23149682          | 11080084 | G | 0    | 0      | A |
| 9 | BICF2P327202            | 11087739 | G | 0.75 | 0.6429 | C |



|   |                         |          |   |      |        |   |
|---|-------------------------|----------|---|------|--------|---|
| 9 | BICF2P1007553           | 11096033 | G | 0.5  | 0.5    | A |
| 9 | BICF2P115345            | 11105909 | A | 0    | 0      | G |
| 9 | BICF2P1203749           | 11127261 | 0 | 0    | 0      | G |
| 9 | BICF2P140556            | 11138110 | 0 | 0    | 0      | A |
| 9 | BICF2P778472            | 11163581 | 0 | 0    | 0      | A |
| 9 | BICF2P1042076           | 11179357 | 0 | 0    | 0      | C |
| 9 | BICF2P857354            | 11185885 | G | 0.5  | 0.5    | A |
| 9 | BICF2P250243            | 11200004 | G | 0.5  | 0.5    | A |
| 9 | BICF2P253618            | 11203479 | 0 | 0    | 0      | G |
| 9 | TIGRP2P243118_rs9185033 | 11218916 | G | 0    | 0      | A |
| 9 | BICF2P616838            | 11233808 | A | 0    | 0      | G |
| 9 | BICF2P440293            | 11245719 | A | 0.75 | 0.3571 | G |
| 9 | BICF2S23763343          | 11251472 | A | 0    | 0.2857 | G |
| 9 | BICF2P444733            | 11268256 | A | 0.75 | 0.3333 | C |
| 9 | BICF2P339122            | 11272935 | G | 0.75 | 0.6429 | A |
| 9 | BICF2P1049068           | 11282236 | A | 0    | 0.3571 | G |
| 9 | BICF2P1342856           | 11300669 | A | 0    | 0      | G |
| 9 | TIGRP2P243136_rs9121564 | 11314912 | 0 | 0    | 0      | G |
| 9 | BICF2P1145008           | 11328994 | 0 | 0    | 0      | C |
| 9 | BICF2P1354703           | 11343152 | G | 0.5  | 0.5    | A |
| 9 | BICF2P953607            | 11354174 | A | 0    | 0      | G |
| 9 | BICF2P10798             | 11367132 | G | 0    | 0      | A |
| 9 | TIGRP2P243147_rs9245286 | 11377029 | A | 0    | 0      | G |
| 9 | BICF2P512882            | 11405635 | G | 0    | 0.2857 | A |
| 9 | BICF2P606189            | 11415150 | G | 0    | 0.2857 | A |
| 9 | BICF2S23538808          | 11423002 | A | 0    | 0      | G |
| 9 | TIGRP2P243174_rs8966116 | 11434594 | G | 1    | 0.7143 | A |
| 9 | BICF2P808374            | 11450001 | A | 0.75 | 0.3571 | G |
| 9 | BICF2P804025            | 11460670 | 0 | 0    | 0      | G |
| 9 | BICF2P51571             | 11474798 | A | 0    | 0.2857 | G |
| 9 | BICF2P1337350           | 11480159 | C | 0    | 0.2857 | A |
| 9 | BICF2P292699            | 11498881 | A | 0.75 | 0.6429 | G |
| 9 | BICF2P263280            | 11502193 | A | 0    | 0      | G |
| 9 | BICF2P1380950           | 11517483 | A | 1    | 0.7143 | G |
| 9 | BICF2S23511312          | 11534072 | A | 0    | 0.2857 | G |
| 9 | BICF2S23713967          | 11536081 | A | 0    | 0.2857 | G |
| 9 | BICF2P1228574           | 11546155 | A | 0    | 0.2857 | G |
| 9 | BICF2S23328283          | 11559342 | A | 0.25 | 0.3571 | T |
| 9 | BICF2P863951            | 11574672 | A | 0    | 0.2857 | C |
| 9 | BICF2P220406            | 11608558 | A | 0    | 0      | G |
| 9 | TIGRP2P243249_rs9007698 | 11615060 | A | 0    | 0      | G |
| 9 | BICF2G63024982          | 11670349 | A | 0.5  | 0.3571 | C |
| 9 | BICF2G63025061          | 11695602 | A | 0    | 0      | G |
| 9 | BICF2G630828624         | 12081543 | A | 0.5  | 0.7857 | T |
| 9 | BICF2G630828606         | 12104387 | A | 0.25 | 0.4286 | G |
| 9 | BICF2G630828600         | 12113869 | A | 0.25 | 0.4286 | G |
| 9 | BICF2G630828582         | 12158850 | A | 0.5  | 0.2143 | G |

|   |                         |          |   |      |        |   |
|---|-------------------------|----------|---|------|--------|---|
| 9 | BICF2P1356457           | 12172779 | A | 0    | 0      | G |
| 9 | BICF2P728553            | 12190139 | G | 0    | 0      | A |
| 9 | BICF2P96143             | 12205289 | 0 | 0    | 0      | A |
| 9 | TIGRP2P123259_rs8861485 | 12234937 | 0 | 0    | 0      | A |
| 9 | BICF2S23512001          | 12236398 | G | 0.25 | 0.3571 | A |
| 9 | BICF2G630828573         | 12259606 | C | 0.5  | 0.2143 | G |
| 9 | BICF2G630828572         | 12276518 | A | 0    | 0      | G |
| 9 | BICF2S23231950          | 12285340 | A | 0.25 | 0.3571 | C |
| 9 | BICF2G630828570         | 12293676 | A | 0.25 | 0.4286 | C |
| 9 | BICF2G630828563         | 12308534 | A | 0.25 | 0.4286 | G |
| 9 | BICF2G630828560         | 12320643 | A | 0    | 0      | C |
| 9 | BICF2S23514060          | 12333375 | A | 0.25 | 0.3571 | G |
| 9 | BICF2G630828559         | 12342760 | A | 0    | 0      | G |
| 9 | BICF2P245050            | 12355242 | 0 | 0    | 0      | A |
| 9 | BICF2G630828557         | 12362714 | A | 0.5  | 0.5    | G |
| 9 | BICF2G630828545         | 12387591 | G | 0    | 0.2857 | A |
| 9 | BICF2P578469            | 12403067 | 0 | 0    | 0      | A |
| 9 | TIGRP2P123251_rs9238067 | 12414354 | 0 | 0    | 0      | G |
| 9 | BICF2G630828525         | 12448438 | A | 0.75 | 0.3571 | C |
| 9 | BICF2P354191            | 12482575 | C | 0    | 0      | A |
| 9 | TIGRP2P123245_rs8651764 | 12489128 | A | 0    | 0      | G |
| 9 | BICF2P669538            | 12514538 | A | 0    | 0      | C |
| 9 | BICF2P528397            | 12526847 | G | 0    | 0      | A |
| 9 | BICF2P370965            | 12537598 | G | 0    | 0      | C |
| 9 | BICF2P19746             | 12553807 | G | 0    | 0      | C |
| 9 | BICF2S23649154          | 12558840 | A | 0.5  | 0.2143 | G |
| 9 | BICF2P368360            | 12569650 | 0 | 0    | 0      | A |
| 9 | BICF2P358317            | 12585309 | G | 0    | 0      | A |
| 9 | BICF2P1195477           | 12599017 | C | 0    | 0      | A |
| 9 | BICF2G630828515         | 12614648 | G | 0    | 0      | A |
| 9 | BICF2P168526            | 12625641 | 0 | 0    | 0      | A |
| 9 | BICF2S2343967           | 12638917 | A | 0    | 0      | G |
| 9 | BICF2G630828506         | 12657770 | A | 0    | 0      | G |
| 9 | BICF2P1208798           | 12671217 | A | 1    | 0.7143 | G |
| 9 | BICF2P1320995           | 12674707 | A | 0.5  | 0.7857 | G |
| 9 | BICF2G630828498         | 12681931 | A | 0.25 | 0.1429 | G |
| 9 | BICF2G630828488         | 12686853 | A | 0.5  | 0.2143 | C |
| 9 | BICF2G630828482         | 12702309 | A | 0    | 0.2857 | T |
| 9 | TIGRP2P123217_rs8896353 | 12724637 | C | 0.75 | 0.6429 | A |
| 9 | BICF2S23511546          | 12734078 | A | 0    | 0      | G |
| 9 | BICF2G630828467         | 12744112 | G | 0    | 0      | A |
| 9 | BICF2P314583            | 12760974 | 0 | 0    | 0      | A |
| 9 | BICF2P524799            | 12766452 | 0 | 0    | 0      | G |
| 9 | BICF2S23750740          | 12781199 | 0 | 0    | 0      | G |
| 9 | BICF2G630828431         | 12809715 | A | 0.75 | 0.5714 | C |
| 9 | BICF2G630828423         | 12813252 | C | 0    | 0      | A |
| 9 | BICF2P648727            | 12832265 | 0 | 0    | 0      | A |

|   |                         |          |   |      |        |   |
|---|-------------------------|----------|---|------|--------|---|
| 9 | BICF2P11418             | 12835223 | G | 0.75 | 0.8571 | A |
| 9 | BICF2S23247266          | 12875468 | C | 0.25 | 0.3571 | G |
| 9 | BICF2G630828413         | 12881946 | A | 0.25 | 0.3571 | G |
| 9 | BICF2G630828406         | 12893076 | G | 0.25 | 0.3571 | A |
| 9 | BICF2P726363            | 12909674 | A | 0    | 0      | G |
| 9 | BICF2S23039634          | 12912580 | G | 0    | 0      | A |
| 9 | BICF2G630828379         | 12914711 | A | 0    | 0      | G |
| 9 | BICF2G630828367         | 12926154 | 0 | 0    | 0      | G |
| 9 | BICF2G630828362         | 12926703 | G | 0.25 | 0.3571 | A |
| 9 | BICF2G630828334         | 12945229 | G | 0    | 0      | A |
| 9 | BICF2G630828328         | 12955171 | G | 0.25 | 0.3571 | A |
| 9 | BICF2S23718395          | 12971882 | G | 0    | 0      | A |
| 9 | BICF2G630828309         | 12994392 | 0 | 0    | 0      | C |
| 9 | BICF2G630828307         | 12995515 | A | 0.75 | 0.6429 | C |
| 9 | TIGRP2P131962_rs8974461 | 13010530 | G | 0    | 0      | A |
| 9 | TIGRP2P131961_rs9236335 | 13021906 | A | 0.25 | 0.3571 | G |
| 9 | TIGRP2P131950_rs8910756 | 13030246 | A | 0.75 | 0.6429 | G |
| 9 | BICF2P961660            | 13066662 | G | 0.75 | 0.6429 | A |
| 9 | TIGRP2P131929_rs8973803 | 13095010 | 0 | 0    | 0      | T |
| 9 | TIGRP2P131925_rs8813533 | 13108682 | A | 0.75 | 0.6429 | C |
| 9 | BICF2P186084            | 13112420 | A | 0    | 0      | G |
| 9 | BICF2P742899            | 13127108 | A | 0.75 | 0.6429 | G |
| 9 | TIGRP2P131920_rs8580006 | 13143634 | C | 0.75 | 0.6429 | A |
| 9 | BICF2P1214081           | 13160299 | A | 0    | 0      | G |
| 9 | TIGRP2P131915_rs9050263 | 13174761 | G | 0    | 0      | C |
| 9 | TIGRP2P131912_rs8594406 | 13185078 | G | 0.25 | 0.3571 | A |
| 9 | BICF2G630828274         | 13191289 | G | 0.25 | 0.3571 | A |
| 9 | TIGRP2P131909_rs8848343 | 13205733 | 0 | 0    | 0      | A |
| 9 | BICF2G630828262         | 13221984 | A | 0    | 0.4167 | C |
| 9 | BICF2G630828258         | 13225794 | A | 0.25 | 0.4286 | G |
| 9 | BICF2S23034713          | 13240551 | C | 0    | 0      | A |
| 9 | BICF2P621989            | 13253767 | 0 | 0    | 0      | G |
| 9 | BICF2S23748504          | 13269452 | A | 0    | 0      | G |
| 9 | BICF2S23753880          | 13273294 | A | 0    | 0      | G |
| 9 | BICF2P187802            | 13284002 | C | 0.75 | 0.5714 | A |
| 9 | BICF2P365346            | 13294513 | A | 0.5  | 0.2143 | G |
| 9 | BICF2G630828237         | 13307440 | A | 0.25 | 0.1429 | G |
| 9 | BICF2G630828219         | 13320378 | A | 0.5  | 0.2143 | G |
| 9 | BICF2S23764945          | 13332535 | G | 0.5  | 0.2143 | A |
| 9 | BICF2S23237314          | 13438336 | A | 0.75 | 0.5714 | G |
| 9 | BICF2G630827883         | 13454313 | G | 0    | 0      | A |
| 9 | BICF2P1300961           | 13515707 | A | 0.25 | 0.3571 | G |
| 9 | BICF2G630827759         | 13567652 | G | 0.75 | 0.3333 | A |
| 9 | BICF2P223643            | 13571684 | 0 | 0    | 0      | A |
| 9 | BICF2P1265386           | 13582670 | 0 | 0    | 0      | A |
| 9 | BICF2P544093            | 13613546 | 0 | 0    | 0      | A |
| 9 | G542f22S110             | 13633662 | 0 | 0    | 0      | A |

|   |                         |          |   |      |        |   |
|---|-------------------------|----------|---|------|--------|---|
| 9 | BICF2G630827752         | 13657473 | A | 0    | 0      | G |
| 9 | BICF2P460813            | 13674012 | 0 | 0    | 0      | G |
| 9 | BICF2G630827749         | 13695034 | A | 0    | 0      | G |
| 9 | BICF2G630827748         | 13698292 | G | 0.25 | 0.3571 | A |
| 9 | BICF2S23415407          | 13714015 | A | 0    | 0      | G |
| 9 | BICF2G630827733         | 13719727 | A | 0.25 | 0.3571 | T |
| 9 | BICF2P1115810           | 13757511 | C | 0    | 0      | A |
| 9 | BICF2S23244467          | 13774548 | A | 0.25 | 0.3571 | G |
| 9 | TIGRP2P131828_rs9035352 | 13806214 | A | 0    | 0      | C |
| 9 | BICF2P1042592           | 13828479 | G | 0.25 | 0.1429 | A |
| 9 | BICF2P124897            | 13871033 | 0 | 0    | 0      | A |
| 9 | G543f33S329             | 13893710 | G | 0.25 | 0.3571 | A |
| 9 | BICF2G630827725         | 13916697 | A | 0.25 | 0.1429 | G |
| 9 | BICF2S23523540          | 13935624 | G | 0.25 | 0.3571 | A |
| 9 | BICF2P853966            | 13950351 | A | 0.25 | 0.3571 | C |
| 9 | BICF2P863483            | 13968098 | 0 | 0    | 0      | G |
| 9 | BICF2P526954            | 13974999 | A | 0.5  | 0.2143 | G |
| 9 | BICF2G630827709         | 13986340 | A | 0.25 | 0.3571 | G |
| 9 | BICF2P308563            | 13998142 | G | 0.75 | 0.8571 | A |
| 9 | TIGRP2P131821_rs8615505 | 14013136 | A | 0.25 | 0.1429 | G |
| 9 | BICF2P1127726           | 14022981 | A | 0.5  | 0.5    | G |
| 9 | BICF2P1237669           | 14032625 | G | 0.75 | 0.8571 | A |
| 9 | BICF2S23512019          | 14047935 | A | 0    | 0.2857 | G |
| 9 | BICF2P424351            | 14051925 | G | 0.5  | 0.7857 | A |
| 9 | BICF2P1033073           | 14059129 | A | 0.5  | 0.7857 | G |
| 9 | BICF2P892842            | 14069491 | 0 | 0    | 0      | G |
| 9 | BICF2P644534            | 14079691 | G | 0.75 | 0.6429 | A |
| 9 | BICF2P1308554           | 14098787 | A | 0.75 | 0.8571 | G |
| 9 | BICF2P21120             | 14102917 | A | 0    | 0.25   | G |
| 9 | BICF2P1259934           | 14110745 | A | 0    | 0      | G |
| 9 | BICF2P1329887           | 14128139 | A | 0    | 0      | G |
| 9 | BICF2P1231531           | 14137453 | A | 0    | 0      | G |
| 9 | BICF2P1149155           | 14163383 | G | 0.5  | 0.2143 | A |
| 9 | BICF2S2355861           | 14170453 | A | 0.25 | 0.3571 | G |
| 9 | BICF2S23622394          | 14187950 | 0 | 0    | 0      | G |
| 9 | BICF2S23259548          | 14211113 | G | 0.25 | 0.3571 | A |
| 9 | TIGRP2P131789_rs9033253 | 14222235 | G | 0.25 | 0.1429 | A |
| 9 | TIGRP2P131786_rs8941018 | 14245058 | A | 0    | 0.25   | G |
| 9 | BICF2S23127082          | 14266874 | G | 0.5  | 0.2143 | A |
| 9 | TIGRP2P131780_rs8534342 | 14278408 | A | 0.25 | 0.1429 | G |
| 9 | TIGRP2P131779_rs8694839 | 14291692 | G | 0.75 | 0.3571 | A |
| 9 | BICF2P689120            | 14300060 | A | 0.75 | 0.3571 | G |
| 9 | BICF2P688248            | 14307624 | A | 0.25 | 0.1429 | G |
| 9 | BICF2S23244425          | 14324095 | A | 0.25 | 0.3571 | G |
| 9 | BICF2P770638            | 14335247 | T | 0.25 | 0.1429 | A |
| 9 | BICF2P84414             | 14358471 | A | 0.75 | 0.5714 | C |
| 9 | BICF2P1173655           | 14373459 | 0 | 0    | 0      | A |

|   |                         |          |   |      |         |   |
|---|-------------------------|----------|---|------|---------|---|
| 9 | BICF2P527686            | 14379723 | G | 0.75 | 0.5714  | A |
| 9 | BICF2P403231            | 14393000 | C | 0    | 0       | A |
| 9 | BICF2P1108446           | 14457021 | A | 0.5  | 0.2143  | G |
| 9 | BICF2P678798            | 14473791 | 0 | 0    | 0       | A |
| 9 | TIGRP2P131771_rs9148885 | 14488249 | A | 0.25 | 0.1429  | G |
| 9 | BICF2P1119926           | 14492429 | 0 | 0    | 0       | A |
| 9 | BICF2P629191            | 14503687 | A | 0.25 | 0.3571  | G |
| 9 | BICF2P913470            | 14519413 | A | 0.25 | 0.3571  | T |
| 9 | BICF2P324955            | 14527438 | G | 0    | 0       | A |
| 9 | BICF2P379867            | 14537709 | 0 | 0    | 0       | A |
| 9 | BICF2P601132            | 14553997 | A | 0    | 0       | C |
| 9 | BICF2P387123            | 14554856 | A | 0.25 | 0.3571  | G |
| 9 | BICF2P254767            | 14565576 | A | 0.5  | 0.2143  | C |
| 9 | BICF2P1341435           | 14580769 | C | 0.75 | 0.5714  | A |
| 9 | BICF2P912862            | 14588421 | A | 0.75 | 0.5714  | G |
| 9 | BICF2P618781            | 14602013 | A | 0.25 | 0.1429  | G |
| 9 | BICF2P1086543           | 14611563 | G | 0.5  | 0.2143  | A |
| 9 | BICF2P1087214           | 14621075 | A | 0.25 | 0.1429  | G |
| 9 | BICF2P495794            | 14637573 | G | 0.25 | 0.3571  | A |
| 9 | BICF2P934581            | 14642149 | A | 0.5  | 0.2143  | G |
| 9 | BICF2P1296472           | 14653190 | G | 0    | 0       | A |
| 9 | BICF2P369789            | 14670083 | A | 0.75 | 0.6429  | G |
| 9 | BICF2P1149635           | 14678086 | G | 0.75 | 0.8571  | A |
| 9 | BICF2S23014061          | 14690753 | A | 0.25 | 0.08333 | G |
| 9 | BICF2P656194            | 14698560 | A | 0.75 | 0.8571  | G |
| 9 | BICF2P1007747           | 14709242 | A | 0.75 | 0.8571  | G |
| 9 | BICF2P854755            | 14728767 | A | 0.25 | 0.1429  | G |
| 9 | TIGRP2P131711_rs8831018 | 14736720 | G | 0.25 | 0.1429  | A |
| 9 | BICF2P123287            | 14753177 | G | 0.5  | 0.5     | A |
| 9 | TIGRP2P131708_rs8381727 | 14759773 | G | 0.5  | 0.5     | A |
| 9 | TIGRP2P131705_rs9036896 | 14766492 | A | 0.25 | 0.1429  | G |
| 9 | BICF2P276203            | 14785588 | A | 0.25 | 0.1429  | G |
| 9 | BICF2P599582            | 14789437 | G | 0    | 0.1429  | A |
| 9 | BICF2S23914746          | 14800605 | G | 0.5  | 0.5     | A |
| 9 | BICF2P271566            | 14814856 | G | 0.5  | 0.5     | A |
| 9 | BICF2S23612829          | 14827196 | A | 0    | 0       | G |
| 9 | BICF2P1259277           | 14840296 | A | 0    | 0       | G |
| 9 | BICF2P376749            | 14850185 | G | 0    | 0       | A |
| 9 | BICF2P659974            | 14859269 | A | 0    | 0       | G |
| 9 | BICF2P1197821           | 14874739 | A | 0    | 0       | G |
| 9 | BICF2P859515            | 14901884 | T | 0.25 | 0.3571  | A |
| 9 | BICF2P713072            | 14910639 | C | 0.25 | 0.3571  | A |
| 9 | BICF2S23750795          | 14915740 | G | 0.25 | 0.3333  | A |
| 9 | BICF2P455771            | 14934740 | C | 0    | 0.2857  | A |
| 9 | TIGRP2P131672_rs9093294 | 14963127 | A | 0.25 | 0.1429  | G |
| 9 | BICF2S23230471          | 14978017 | G | 0.25 | 0.3571  | A |
| 9 | BICF2S23238050          | 14993918 | G | 0.25 | 0.3571  | A |

|   |                         |          |   |      |        |   |
|---|-------------------------|----------|---|------|--------|---|
| 9 | BICF2P1458281           | 15014208 | A | 0    | 0      | G |
| 9 | BICF2P926316            | 15022972 | A | 0    | 0      | G |
| 9 | BICF2P865898            | 15034819 | A | 0.25 | 0.3571 | C |
| 9 | BICF2S23644982          | 15047240 | A | 0    | 0      | G |
| 9 | TIGRP2P131659_rs8744388 | 15061419 | G | 0.75 | 0.6429 | A |
| 9 | TIGRP2P131654_rs9177266 | 15066069 | A | 0    | 0      | G |
| 9 | BICF2P1181220           | 15081113 | 0 | 0    | 0      | G |
| 9 | BICF2P1181641           | 15090714 | A | 0    | 0      | G |
| 9 | BICF2P646505            | 15104536 | G | 0    | 0      | A |
| 9 | BICF2P1267851           | 15117102 | A | 0    | 0      | C |
| 9 | BICF2P1267850           | 15117463 | A | 0.25 | 0.1429 | G |
| 9 | TIGRP2P131639_rs9118783 | 15132876 | G | 0    | 0      | A |
| 9 | BICF2S23411069          | 15139234 | A | 0    | 0      | G |
| 9 | BICF2P32704             | 15153266 | G | 0.5  | 0.2143 | A |
| 9 | BICF2P6438              | 15157084 | A | 0.5  | 0.2143 | G |
| 9 | BICF2P394191            | 15172417 | G | 0    | 0      | A |
| 9 | BICF2P1124044           | 15197640 | A | 0    | 0      | G |
| 9 | BICF2P1159438           | 15202774 | G | 0    | 0      | A |
| 9 | BICF2P1065371           | 15216229 | 0 | 0    | 0      | A |
| 9 | BICF2P985600            | 15244740 | C | 0.75 | 0.5714 | A |
| 9 | BICF2P993742            | 15254030 | G | 0.25 | 0.3571 | A |
| 9 | BICF2P883021            | 15263443 | A | 0.25 | 0.4286 | G |
| 9 | BICF2S23517549          | 15265713 | G | 0.25 | 0.3571 | A |
| 9 | BICF2P539693            | 15278060 | A | 0.25 | 0.1429 | G |
| 9 | BICF2P1382224           | 15287229 | A | 0.5  | 0.5    | G |
| 9 | TIGRP2P131614_rs8555155 | 15287526 | A | 0.5  | 0.5    | G |
| 9 | BICF2P893694            | 15291586 | A | 0.25 | 0.3571 | C |
| 9 | BICF2S23743891          | 15292457 | A | 0    | 0      | G |
| 9 | BICF2P306908            | 15297801 | A | 0.25 | 0.3571 | G |
| 9 | BICF2P925262            | 15313327 | C | 0.25 | 0.3571 | A |
| 9 | BICF2P446460            | 15317966 | A | 0.75 | 0.5714 | G |
| 9 | BICF2P967935            | 15325764 | A | 0    | 0      | G |
| 9 | BICF2P881346            | 15338039 | A | 0.25 | 0.3571 | G |
| 9 | BICF2S2322352           | 15350605 | A | 0.25 | 0.3571 | G |
| 9 | BICF2P835888            | 15357792 | G | 1    | 0.7143 | A |
| 9 | BICF2P37032             | 15369632 | A | 1    | 0.7143 | G |
| 9 | BICF2S23346021          | 15377558 | G | 0.75 | 0.5714 | A |
| 9 | BICF2S24321721          | 15393031 | A | 0.25 | 0.1429 | G |
| 9 | BICF2S23738913          | 15398956 | A | 0    | 0      | G |
| 9 | BICF2P709500            | 15420517 | G | 0.25 | 0.1429 | A |
| 9 | BICF2S23334287          | 15424096 | A | 0.5  | 0.5    | G |
| 9 | BICF2P143573            | 15436412 | G | 0.5  | 0.2143 | A |
| 9 | BICF2P1395227           | 15465264 | 0 | 0    | 0      | A |
| 9 | BICF2P155745            | 15492669 | A | 0    | 0      | G |
| 9 | BICF2P445217            | 15512206 | G | 0    | 0      | A |
| 9 | BICF2S23542057          | 15531913 | G | 0.25 | 0.3571 | A |
| 9 | TIGRP2P131600_rs8940570 | 15541602 | 0 | 0    | 0      | A |

|   |                         |          |   |      |        |   |
|---|-------------------------|----------|---|------|--------|---|
| 9 | BICF2P1219544           | 15551190 | 0 | 0    | 0      | A |
| 9 | BICF2S23439872          | 15568397 | A | 0    | 0      | G |
| 9 | BICF2P102458            | 15598507 | A | 0.5  | 0.2143 | G |
| 9 | TIGRP2P131596_rs8565189 | 15626124 | 0 | 0    | 0      | C |
| 9 | BICF2P1026047           | 15667471 | G | 0.75 | 0.8571 | A |
| 9 | BICF2S23253915          | 15674728 | 0 | 0    | 0      | G |
| 9 | BICF2P37355             | 15692105 | 0 | 0    | 0      | A |
| 9 | TIGRP2P131580_rs9033169 | 15704308 | A | 0    | 0.2857 | G |
| 9 | TIGRP2P131576_rs8802404 | 15725491 | A | 0    | 0      | C |
| 9 | BICF2P9118              | 15734386 | A | 0.5  | 0.2143 | G |
| 9 | BICF2P513388            | 15745898 | A | 0    | 0      | G |
| 9 | BICF2S24110623          | 15756666 | A | 0.25 | 0.3571 | C |
| 9 | BICF2P1381452           | 15779169 | G | 0.25 | 0.3571 | A |
| 9 | BICF2S23234883          | 15811899 | C | 0.25 | 0.3571 | A |
| 9 | BICF2P526229            | 15819057 | 0 | 0    | 0      | A |
| 9 | TIGRP2P131561_rs9083262 | 15827369 | T | 0.25 | 0.3571 | A |
| 9 | BICF2P147614            | 15839334 | G | 0.25 | 0.3571 | A |
| 9 | BICF2P754719            | 15868398 | G | 0.25 | 0.3571 | A |
| 9 | BICF2P386788            | 15881243 | G | 0    | 0      | A |
| 9 | BICF2S23736224          | 15885731 | C | 0.25 | 0.3571 | A |
| 9 | BICF2P954683            | 15903068 | G | 0    | 0      | A |
| 9 | BICF2P954689            | 15905986 | G | 0    | 0      | C |
| 9 | BICF2P954690            | 15906545 | A | 0    | 0      | G |
| 9 | BICF2P308451            | 15918817 | A | 0    | 0      | C |
| 9 | BICF2P434306            | 15933669 | C | 0    | 0      | G |
| 9 | BICF2P112502            | 15941829 | A | 1    | 1      | G |
| 9 | BICF2P1244067           | 15960573 | A | 0    | 0      | G |
| 9 | BICF2P1198946           | 15966161 | A | 0    | 0      | C |
| 9 | BICF2S23135452          | 15993425 | A | 0    | 0      | C |
| 9 | BICF2P1139135           | 16007108 | A | 0.25 | 0.3571 | G |
| 9 | BICF2P1301866           | 16012537 | G | 0.5  | 0.5    | A |
| 9 | BICF2P120022            | 16020606 | A | 0    | 0      | G |
| 9 | BICF2P232767            | 16032229 | A | 0    | 0      | G |
| 9 | BICF2S22954942          | 16063087 | A | 0.25 | 0.3571 | G |
| 9 | BICF2P1256786           | 16065981 | 0 | 0    | 0      | A |
| 9 | BICF2S23041512          | 16077702 | G | 0.25 | 0.3571 | A |
| 9 | TIGRP2P131518_rs9137737 | 16090815 | G | 0.75 | 0.8571 | A |
| 9 | TIGRP2P131512_rs9197226 | 16111015 | A | 0.5  | 0.5    | G |
| 9 | BICF2S23269             | 16119916 | A | 0.75 | 0.5714 | C |
| 9 | BICF2S232192            | 16123765 | A | 0.25 | 0.3571 | G |
| 9 | TIGRP2P131505_rs9146176 | 16137266 | A | 0    | 0.2857 | G |
| 9 | BICF2P258474            | 16137635 | 0 | 0    | 0      | G |
| 9 | BICF2P960452            | 16156464 | A | 0.5  | 0.5    | G |
| 9 | BICF2S23331468          | 16157511 | A | 0.5  | 0.5    | G |
| 9 | BICF2S23744440          | 16171624 | A | 0    | 0      | G |
| 9 | BICF2P423066            | 16184548 | A | 0.5  | 0.2143 | T |
| 9 | BICF2P998133            | 16201592 | A | 0    | 0      | G |

|   |                         |          |   |      |        |   |
|---|-------------------------|----------|---|------|--------|---|
| 9 | BICF2G630827704         | 16206447 | 0 | 0    | 0      | A |
| 9 | BICF2P268072            | 16217336 | A | 0    | 0      | G |
| 9 | BICF2S23211965          | 16230141 | C | 0.25 | 0.3571 | A |
| 9 | BICF2S2456014           | 16246753 | A | 1    | 0.7    | G |
| 9 | BICF2P747742            | 16252859 | A | 0    | 0      | G |
| 9 | BICF2P724540            | 16267205 | A | 0.5  | 0.2143 | G |
| 9 | BICF2P183501            | 16273030 | G | 0.25 | 0.4286 | A |
| 9 | BICF2P1017635           | 16292391 | A | 0    | 0      | G |
| 9 | TIGRP2P131475_rs8615003 | 16305613 | 0 | 0    | 0      | C |
| 9 | BICF2P307827            | 16309893 | A | 0    | 0      | C |
| 9 | BICF2S23336208          | 16346289 | A | 0.25 | 0.4286 | G |
| 9 | BICF2P861343            | 16355654 | 0 | 0    | 0      | G |
| 9 | BICF2P902288            | 16388439 | 0 | 0    | 0      | C |
| 9 | BICF2S23258989          | 16412032 | C | 0.25 | 0.3571 | A |
| 9 | BICF2P814755            | 16424075 | 0 | 0    | 0      | C |
| 9 | BICF2P340566            | 16434252 | A | 0    | 0      | G |
| 9 | BICF2S23610349          | 16459735 | A | 0    | 0      | G |
| 9 | BICF2P778497            | 16497952 | T | 0    | 0      | A |
| 9 | BICF2P284902            | 16507964 | T | 0.25 | 0.3571 | A |
| 9 | BICF2P852282            | 16522183 | A | 0.25 | 0.3571 | T |
| 9 | BICF2S230712            | 16525738 | A | 0    | 0      | C |
| 9 | TIGRP2P131450_rs8824940 | 16547131 | G | 0.25 | 0.3571 | A |
| 9 | BICF2P919957            | 16553433 | G | 0.75 | 0.3571 | A |
| 9 | BICF2P1190026           | 16565845 | G | 0    | 0.2857 | A |
| 9 | BICF2P1318954           | 16590986 | G | 0.75 | 0.8571 | A |
| 9 | BICF2P577039            | 16603817 | G | 1    | 0.7143 | A |
| 9 | BICF2P220675            | 16610619 | G | 1    | 0.7143 | A |
| 9 | TIGRP2P131417_rs9250623 | 16622608 | A | 0.5  | 0.5    | C |
| 9 | BICF2S23214271          | 16631507 | G | 0.25 | 0.6429 | A |
| 9 | BICF2P1328224           | 16641333 | G | 0.75 | 0.8571 | A |
| 9 | BICF2P63521             | 16647149 | A | 0.25 | 0.4286 | G |
| 9 | BICF2P63519             | 16648647 | A | 0    | 0      | G |
| 9 | BICF2P722870            | 16657026 | G | 0.25 | 0.6429 | A |
| 9 | BICF2P978505            | 16666114 | A | 0.5  | 0.2143 | G |
| 9 | TIGRP2P131391_rs8850423 | 16678142 | A | 0.5  | 0.2143 | G |
| 9 | BICF2P149230            | 16694305 | G | 0.5  | 0.2143 | A |
| 9 | BICF2P275863            | 16709435 | 0 | 0    | 0      | G |
| 9 | BICF2G630827703         | 16711010 | 0 | 0    | 0      | A |
| 9 | BICF2S22920941          | 16734237 | G | 0.5  | 0.5    | A |
| 9 | BICF2P378226            | 16745160 | G | 0.25 | 0.3571 | A |
| 9 | BICF2P871320            | 16756351 | 0 | 0    | 0      | A |
| 9 | BICF2P612600            | 16773449 | G | 0.5  | 0.5    | A |
| 9 | TIGRP2P131379_rs8990402 | 16782158 | 0 | 0    | 0      | A |
| 9 | BICF2S22918640          | 16792735 | G | 0.25 | 0.3571 | A |
| 9 | BICF2P1362114           | 16801950 | A | 0    | 0.2857 | G |
| 9 | BICF2P567810            | 16816940 | G | 0    | 0.2857 | A |
| 9 | BICF2P954258            | 16826540 | A | 0    | 0      | G |



|   |                         |          |   |      |        |   |
|---|-------------------------|----------|---|------|--------|---|
| 9 | BICF2P410430            | 16838018 | A | 0    | 0.2857 | G |
| 9 | BICF2P1100728           | 16852367 | A | 0.25 | 0.1429 | G |
| 9 | BICF2S23023176          | 16860671 | G | 0.75 | 0.3571 | A |
| 9 | BICF2P229820            | 16875778 | C | 0.75 | 0.5714 | A |
| 9 | BICF2P819347            | 16892000 | A | 0.25 | 0.1429 | G |
| 9 | BICF2P1003965           | 16914513 | 0 | 0    | 0      | G |
| 9 | TIGRP2P131372_rs9179124 | 16918718 | A | 0.25 | 0.1429 | G |
| 9 | TIGRP2P131371_rs8611131 | 16950565 | 0 | 0    | 0      | G |
| 9 | BICF2G630827702         | 16968282 | 0 | 0    | 0      | A |
| 9 | BICF2P1348014           | 16990729 | 0 | 0    | 0      | G |
| 9 | BICF2P1283898           | 17006345 | A | 0    | 0      | G |
| 9 | BICF2P476013            | 17015576 | 0 | 0    | 0      | A |
| 9 | BICF2S23148912          | 17024224 | A | 0    | 0      | G |
| 9 | BICF2P1358518           | 17038287 | A | 0    | 0      | G |
| 9 | BICF2S24116872          | 17045666 | 0 | 0    | 0      | A |
| 9 | G544f58S24              | 17061852 | 0 | 0    | 0      | C |
| 9 | TIGRP2P131370_rs8933439 | 17070882 | A | 0    | 0      | G |
| 9 | BICF2S23136861          | 17110487 | G | 0    | 0.2857 | A |
| 9 | BICF2P309026            | 17120698 | 0 | 0    | 0      | G |
| 9 | TIGRP2P131368_rs8922309 | 17133915 | 0 | 0    | 0      | G |
| 9 | BICF2P83519             | 17148290 | A | 0    | 0      | G |
| 9 | BICF2S23121450          | 17171595 | G | 0    | 0      | A |
| 9 | BICF2S232490            | 17203682 | A | 0.75 | 0.8571 | G |
| 9 | BICF2P54232             | 17207137 | G | 0.5  | 0.5    | A |
| 9 | BICF2P694696            | 17220618 | G | 1    | 1      | A |
| 9 | BICF2P1398687           | 17232297 | G | 0    | 0      | A |
| 9 | BICF2S23510298          | 17248229 | A | 0.5  | 0.5    | G |
| 9 | BICF2P1392188           | 17276442 | A | 0    | 0      | C |
| 9 | BICF2P997381            | 17291977 | 0 | 0    | 0      | C |
| 9 | BICF2P531568            | 17312815 | 0 | 0    | 0      | A |
| 9 | TIGRP2P131348_rs8707552 | 17341543 | T | 0.75 | 0.8571 | A |
| 9 | BICF2P337737            | 17351069 | C | 0.5  | 0.5    | G |
| 9 | BICF2P1437443           | 17357886 | G | 0.75 | 0.8571 | A |
| 9 | BICF2P772423            | 17365800 | T | 0.75 | 0.8571 | A |
| 9 | BICF2P817518            | 17380923 | 0 | 0    | 0      | G |
| 9 | BICF2P597343            | 17388815 | A | 0.75 | 0.8571 | G |
| 9 | BICF2P1113569           | 17418042 | A | 0.5  | 0.5    | G |
| 9 | BICF2P360409            | 17432327 | A | 0.5  | 0.5    | G |
| 9 | BICF2P868222            | 17436389 | A | 0.75 | 0.8571 | G |
| 9 | BICF2P302858            | 17453208 | G | 1    | 1      | A |
| 9 | BICF2S23641698          | 17459302 | G | 0    | 0.2857 | A |
| 9 | BICF2S23526433          | 17475371 | C | 0.25 | 0.3571 | G |
| 9 | G545f29S175             | 17496942 | G | 0.25 | 0.3571 | A |
| 9 | BICF2S2453276           | 17510460 | 0 | 0    | 0      | C |
| 9 | BICF2S23453357          | 17516336 | 0 | 0    | 0      | A |
| 9 | BICF2S24110328          | 17544044 | 0 | 0    | 0      | G |
| 9 | BICF2P257933            | 17565412 | A | 0    | 0      | G |

|   |                         |          |   |      |        |   |
|---|-------------------------|----------|---|------|--------|---|
| 9 | BICF2P1470913           | 17581446 | G | 0    | 0      | A |
| 9 | BICF2P877906            | 17594202 | C | 0.75 | 0.3571 | G |
| 9 | BICF2P149861            | 17607535 | 0 | 0    | 0      | A |
| 9 | BICF2P495004            | 17619943 | A | 0    | 0      | G |
| 9 | BICF2P1421034           | 17644284 | G | 0    | 0      | A |
| 9 | BICF2P156242            | 17668971 | C | 0    | 0      | A |
| 9 | BICF2S2328455           | 17674514 | A | 0.25 | 0.3571 | G |
| 9 | BICF2P1360458           | 17676121 | A | 0.25 | 0.1429 | G |
| 9 | BICF2S2329190           | 17677819 | G | 0.25 | 0.3571 | A |
| 9 | BICF2P35065             | 17697331 | A | 0    | 0      | G |
| 9 | BICF2S23214249          | 17699943 | A | 0.25 | 0.3571 | G |
| 9 | BICF2P169593            | 17715282 | A | 0.25 | 0.1429 | G |
| 9 | BICF2P684563            | 17727859 | C | 0    | 0      | A |
| 9 | BICF2P202298            | 17734002 | G | 0.5  | 0.5    | A |
| 9 | TIGRP2P131320_rs8716132 | 17752619 | A | 0    | 0      | G |
| 9 | TIGRP2P131317_rs9114296 | 17758090 | G | 0.25 | 0.1429 | A |
| 9 | BICF2P1061810           | 17774276 | A | 0.25 | 0.1429 | G |
| 9 | TIGRP2P123210_rs8754621 | 17781657 | G | 0    | 0      | A |
| 9 | BICF2P33519             | 17796933 | G | 0.75 | 0.8571 | A |
| 9 | BICF2S2337469           | 17807858 | G | 0.25 | 0.1429 | A |
| 9 | BICF2S23534706          | 17809271 | G | 0    | 0      | A |
| 9 | BICF2S23522949          | 17814283 | A | 0.25 | 0.3571 | G |
| 9 | BICF2S23517692          | 17833175 | A | 0.25 | 0.1429 | G |
| 9 | TIGRP2P123183_rs9187437 | 17841242 | G | 0.5  | 0.5    | A |
| 9 | BICF2P823592            | 17853716 | A | 0.25 | 0.1429 | G |
| 9 | BICF2P103127            | 17861175 | 0 | 0    | 0      | C |
| 9 | BICF2S23211226          | 17878285 | G | 0.25 | 0.3571 | C |
| 9 | BICF2P644710            | 17890277 | A | 1    | 0.7143 | G |
| 9 | BICF2P242077            | 17899831 | 0 | 0    | 0      | G |
| 9 | BICF2S23229872          | 17907286 | C | 0.25 | 0.3571 | A |
| 9 | BICF2P127526            | 17919104 | 0 | 0    | 0      | A |
| 9 | BICF2P488623            | 17935326 | 0 | 0    | 0      | C |
| 9 | TIGRP2P123165_rs9098280 | 17949608 | A | 0    | 0.2857 | G |
| 9 | BICF2S2334042           | 17952343 | A | 0.5  | 0.2143 | G |
| 9 | BICF2P515044            | 17962389 | G | 0.25 | 0.6429 | A |
| 9 | BICF2S229772            | 17983069 | C | 0    | 0      | A |
| 9 | TIGRP2P123153_rs9076656 | 17992766 | A | 1    | 1      | C |
| 9 | BICF2P592894            | 18004722 | G | 0.75 | 0.3571 | A |
| 9 | TIGRP2P123149_rs8883967 | 18009623 | G | 0.25 | 0.3571 | A |
| 9 | BICF2P411608            | 18022770 | G | 0.25 | 0.6429 | A |
| 9 | BICF2P871200            | 18023940 | G | 0.25 | 0.6429 | A |
| 9 | BICF2P353627            | 18039088 | G | 0    | 0      | A |
| 9 | BICF2S2357637           | 18047392 | 0 | 0    | 0      | G |
| 9 | BICF2P430214            | 18055714 | C | 0.25 | 0.6429 | A |
| 9 | BICF2S23126382          | 18099455 | 0 | 0    | 0      | A |
| 9 | BICF2P98561             | 18102956 | 0 | 0    | 0      | A |
| 9 | TIGRP2P123139_rs8986901 | 18113900 | 0 | 0    | 0      | G |

|   |                         |          |   |      |        |   |
|---|-------------------------|----------|---|------|--------|---|
| 9 | BICF2P196780            | 18127435 | A | 0    | 0      | G |
| 9 | BICF2P897099            | 18136101 | G | 0    | 0.2857 | A |
| 9 | BICF2P1436402           | 18149434 | A | 1    | 0.7143 | G |
| 9 | BICF2S23416089          | 18159499 | A | 0    | 0      | C |
| 9 | TIGRP2P123125_rs9074353 | 18177984 | A | 0.5  | 0.5    | G |
| 9 | TIGRP2P123122_rs8736681 | 18181850 | A | 0.5  | 0.2143 | G |
| 9 | BICF2P978951            | 18204550 | A | 0    | 0.2857 | G |
| 9 | BICF2S22937536          | 18224375 | G | 0.25 | 0.3571 | A |
| 9 | BICF2P322357            | 18228698 | G | 0.75 | 0.5714 | A |
| 9 | BICF2P881262            | 18241965 | A | 0.5  | 0.7857 | G |
| 9 | BICF2P83907             | 18251166 | G | 0    | 0.2857 | A |
| 9 | BICF2S22955731          | 18253931 | A | 0.25 | 0.4286 | C |
| 9 | BICF2P931374            | 18268300 | G | 0.5  | 0.7857 | A |
| 9 | BICF2P385032            | 18278131 | O | 0    | 0      | A |
| 9 | TIGRP2P123096_rs8578541 | 18293242 | A | 0.25 | 0.6429 | G |
| 9 | BICF2P1371428           | 18307306 | A | 0    | 0.2857 | G |
| 9 | BICF2P206197            | 18311761 | A | 0.75 | 0.8571 | G |
| 9 | TIGRP2P123085_rs8592010 | 18329901 | A | 0.75 | 0.8571 | T |
| 9 | TIGRP2P123081_rs8695428 | 18342154 | G | 0.75 | 0.8571 | A |
| 9 | BICF2S23748522          | 18343028 | G | 0.75 | 0.8571 | A |
| 9 | BICF2S23220840          | 18358373 | G | 0.75 | 0.8571 | A |
| 9 | BICF2P421279            | 18365893 | C | 0.5  | 0.2143 | A |
| 9 | BICF2S2341377           | 18377572 | C | 0.25 | 0.4286 | A |
| 9 | BICF2P415777            | 18399883 | G | 0    | 0      | A |
| 9 | BICF2S2344326           | 18400861 | G | 0.25 | 0.6429 | A |
| 9 | BICF2P875387            | 18418646 | A | 0    | 0      | G |
| 9 | BICF2P318017            | 18423741 | G | 0    | 0      | A |
| 9 | BICF2S23125367          | 18442784 | T | 0    | 0.2857 | A |
| 9 | TIGRP2P123054_rs8988636 | 18457045 | A | 0.5  | 0.2143 | T |
| 9 | BICF2S23231596          | 18463437 | G | 1    | 0.7143 | A |
| 9 | BICF2P214459            | 18473828 | A | 0    | 0      | G |
| 9 | BICF2S2362140           | 18491230 | C | 0.5  | 0.5    | A |
| 9 | BICF2S22927103          | 18493350 | A | 0.25 | 0.1429 | G |
| 9 | BICF2P1262649           | 18505600 | G | 0    | 0      | A |
| 9 | BICF2P936307            | 18520414 | A | 0.75 | 0.6429 | G |
| 9 | BICF2P1160954           | 18537450 | G | 0    | 0      | A |
| 9 | BICF2P600921            | 18540667 | O | 0    | 0      | C |
| 9 | BICF2P1378969           | 18552040 | G | 0    | 0      | C |
| 9 | BICF2P1292091           | 18553621 | A | 0    | 0      | G |
| 9 | BICF2P597796            | 18564711 | C | 0    | 0      | A |
| 9 | BICF2P280208            | 18579939 | O | 0    | 0      | A |
| 9 | BICF2P393506            | 18593667 | G | 0.75 | 0.5714 | A |
| 9 | BICF2P1288768           | 18597315 | G | 0.5  | 0.2143 | A |
| 9 | TIGRP2P123011_rs8627041 | 18607426 | A | 0.25 | 0.1429 | G |
| 9 | BICF2S22959351          | 18622932 | A | 1    | 1      | C |
| 9 | BICF2P946866            | 18650779 | A | 0    | 0      | G |
| 9 | BICF2P939366            | 18659769 | A | 0.25 | 0.3571 | G |

|   |                         |          |   |      |        |   |
|---|-------------------------|----------|---|------|--------|---|
| 9 | BICF2P504361            | 18668090 | 0 | 0    | 0      | G |
| 9 | BICF2S23435718          | 18684395 | 0 | 0    | 0      | G |
| 9 | BICF2P290179            | 18687570 | G | 0    | 0.3333 | A |
| 9 | BICF2P1437270           | 18702118 | A | 0    | 0.2857 | G |
| 9 | TIGRP2P122994_rs9180347 | 18721267 | A | 0    | 0.2857 | C |
| 9 | BICF2P863881            | 18727519 | A | 0.75 | 0.6429 | G |
| 9 | BICF2S23028523          | 18734515 | A | 0.25 | 0.6429 | G |
| 9 | BICF2P837568            | 18749364 | G | 0    | 0.2857 | A |
| 9 | BICF2P158986            | 18764948 | G | 0.25 | 0.4286 | A |
| 9 | BICF2S2324010           | 18780707 | A | 0.25 | 0.3571 | G |
| 9 | BICF2P335546            | 18791284 | G | 0.25 | 0.4286 | A |
| 9 | BICF2P1426353           | 18805137 | A | 0.25 | 0.4286 | G |
| 9 | BICF2P988600            | 18825099 | G | 0    | 0      | A |
| 9 | BICF2P1071056           | 18839603 | C | 0    | 0.2857 | A |
| 9 | BICF2P1039289           | 18848939 | G | 0.25 | 0.6429 | A |
| 9 | BICF2P1054525           | 18882376 | A | 0    | 0      | G |
| 9 | TIGRP2P122931_rs8615391 | 18887205 | A | 0    | 0.2857 | G |
| 9 | BICF2P1137230           | 18896059 | A | 0.25 | 0.6429 | G |
| 9 | BICF2P718275            | 18911590 | A | 0.5  | 0.5    | G |
| 9 | BICF2P393326            | 18926539 | C | 0.5  | 0.7857 | G |
| 9 | BICF2P410707            | 18929341 | C | 0    | 0      | A |
| 9 | BICF2S2317717           | 18963499 | A | 0    | 0      | G |
| 9 | BICF2S23223892          | 18996332 | G | 0.25 | 0.3571 | A |
| 9 | BICF2P328758            | 18998670 | G | 0.25 | 0.3571 | A |
| 9 | BICF2P158760            | 19014494 | G | 0.5  | 0.2143 | A |
| 9 | TIGRP2P122906_rs8977328 | 19028665 | A | 0.25 | 0.4286 | G |
| 9 | BICF2S23055739          | 19037490 | T | 1    | 0.7143 | A |
| 9 | BICF2P385702            | 19046619 | 0 | 0    | 0      | A |
| 9 | BICF2P1161165           | 19057590 | C | 0    | 0.2857 | A |
| 9 | BICF2S23438262          | 19070468 | C | 0    | 0.2857 | A |
| 9 | BICF2S23516922          | 19084362 | C | 0.5  | 0.5    | A |
| 9 | BICF2S2438924           | 19096254 | G | 0    | 0      | A |
| 9 | BICF2P39549             | 19112999 | A | 0    | 0      | C |
| 9 | BICF2S2294380           | 19121052 | G | 0.5  | 0.5    | A |
| 9 | BICF2S2439997           | 19128539 | G | 0.25 | 0.3571 | A |
| 9 | BICF2P1251030           | 19129572 | G | 0.25 | 0.1429 | A |
| 9 | BICF2P192682            | 19140965 | G | 0.25 | 0.1429 | A |
| 9 | BICF2P1227511           | 19152537 | A | 0    | 0      | C |
| 9 | BICF2P452889            | 19160959 | G | 0.25 | 0.3571 | A |
| 9 | BICF2S23213488          | 19175891 | A | 0.25 | 0.6429 | C |
| 9 | BICF2P364366            | 19183929 | G | 0    | 0.2857 | A |
| 9 | BICF2P47724             | 19194063 | A | 1    | 0.7143 | G |
| 9 | TIGRP2P122882_rs8697130 | 19211537 | 0 | 0    | 0      | A |
| 9 | TIGRP2P122880_rs8730353 | 19227765 | G | 0.5  | 0.5    | A |
| 9 | BICF2P1103697           | 19228271 | A | 0    | 0      | G |
| 9 | BICF2P437369            | 19245568 | 0 | 0    | 0      | A |
| 9 | BICF2S23147133          | 19262018 | G | 0.75 | 0.3571 | A |

|   |                         |          |   |      |        |   |
|---|-------------------------|----------|---|------|--------|---|
| 9 | BICF2P277664            | 19266785 | A | 1    | 0.7143 | G |
| 9 | BICF2P438701            | 19281859 | G | 1    | 0.7143 | A |
| 9 | BICF2P589810            | 19289821 | A | 1    | 0.75   | G |
| 9 | BICF2P394578            | 19312506 | A | 0    | 0.25   | G |
| 9 | BICF2S22940511          | 19325595 | A | 0.25 | 0.3571 | C |
| 9 | TIGRP2P122861_rs9011246 | 19338752 | A | 0.25 | 0.3571 | G |
| 9 | BICF2P1079087           | 19349148 | A | 0    | 0      | G |
| 9 | BICF2S23422364          | 19359857 | T | 0    | 0      | A |
| 9 | BICF2P464960            | 19367120 | G | 0.25 | 0.6429 | A |
| 9 | BICF2P579696            | 19381199 | A | 0    | 0      | G |
| 9 | BICF2P497312            | 19396139 | A | 0.25 | 0.6429 | C |
| 9 | BICF2P1230700           | 19418665 | A | 0.75 | 0.3571 | G |
| 9 | BICF2S24322284          | 19440998 | 0 | 0    | 0      | G |
| 9 | BICF2P1367090           | 19448789 | A | 0    | 0      | G |
| 9 | BICF2P1330724           | 19459162 | G | 0    | 0      | A |
| 9 | BICF2P429213            | 19487183 | G | 0.25 | 0.3571 | A |
| 9 | TIGRP2P122831_rs8743220 | 19498086 | A | 1    | 0.7143 | C |
| 9 | BICF2P743446            | 19517044 | A | 0    | 0      | G |
| 9 | BICF2P664085            | 19527900 | A | 0    | 0      | G |
| 9 | BICF2S2312267           | 19545416 | G | 0    | 0      | C |
| 9 | BICF2P674761            | 19559136 | A | 0.25 | 0.1429 | G |
| 9 | TIGRP2P122814_rs8693201 | 19563146 | 0 | 0    | 0      | G |
| 9 | BICF2P439062            | 19573125 | G | 0.25 | 0.3571 | A |
| 9 | TIGRP2P122813_rs9123115 | 19585236 | A | 0.5  | 0.5    | G |
| 9 | BICF2P422703            | 19601839 | G | 0.25 | 0.1429 | A |
| 9 | BICF2P1125643           | 19623231 | A | 0.5  | 0.5    | G |
| 9 | BICF2P177530            | 19633156 | 0 | 0    | 0      | C |
| 9 | TIGRP2P122801_rs9003400 | 19650590 | 0 | 0    | 0      | G |
| 9 | BICF2P528580            | 19662960 | 0 | 0    | 0      | A |
| 9 | BICF2P518001            | 19665397 | A | 0    | 0      | C |
| 9 | BICF2S23210280          | 19676872 | A | 0    | 0      | G |
| 9 | BICF2P1328373           | 19688653 | A | 0    | 0      | G |
| 9 | BICF2P684875            | 19704726 | 0 | 0    | 0      | C |
| 9 | BICF2S23248752          | 19713259 | G | 0.25 | 0.3571 | A |
| 9 | TIGRP2P122786_rs8677070 | 19731376 | 0 | 0    | 0      | G |
| 9 | TIGRP2P122785_rs9047176 | 19742372 | A | 0    | 0      | G |
| 9 | BICF2P384094            | 19749596 | 0 | 0    | 0      | C |
| 9 | BICF2P289055            | 19762988 | A | 0    | 0      | C |
| 9 | BICF2S2399608           | 19817149 | A | 0    | 0      | C |
| 9 | BICF2G630827582         | 19826590 | G | 0.5  | 0.7857 | A |
| 9 | BICF2G630827553         | 19838442 | A | 0.5  | 0.5714 | G |
| 9 | BICF2G630827487         | 19859884 | A | 0.5  | 0.5714 | C |
| 9 | BICF2G630827481         | 19862889 | G | 0.5  | 0.2143 | A |
| 9 | BICF2G630827451         | 19874171 | A | 0    | 0      | C |
| 9 | TIGRP2P242421_rs8674609 | 20119692 | A | 0    | 0      | C |
| 9 | BICF2P1437184           | 20131445 | C | 0.5  | 0.4167 | G |
| 9 | BICF2S22928304          | 20137705 | G | 0    | 0      | A |

|   |                         |          |   |      |        |   |
|---|-------------------------|----------|---|------|--------|---|
| 9 | TIGRP2P242449_rs8698184 | 20150433 | A | 0.25 | 0.3333 | C |
| 9 | BICF2G630826890         | 20160947 | A | 0.25 | 0.3571 | G |
| 9 | BICF2G630826873         | 20174140 | G | 0.25 | 0.5    | A |
| 9 | BICF2G630826757         | 20206226 | A | 0.5  | 0.4286 | G |
| 9 | BICF2S23348997          | 20228913 | A | 0.5  | 0.3571 | C |
| 9 | BICF2G630826601         | 20253550 | A | 0.5  | 0.4286 | G |
| 9 | BICF2G630826538         | 20274406 | G | 0    | 0      | A |
| 9 | BICF2P1242571           | 20287660 | A | 0    | 0      | G |
| 9 | TIGRP2P242544_rs9060129 | 20299052 | A | 0.5  | 0.3571 | C |
| 9 | BICF2P1381490           | 20312347 | A | 0    | 0      | G |
| 9 | BICF2S2356115           | 20324959 | G | 0.5  | 0.4167 | A |
| 9 | TIGRP2P242595_rs9051859 | 20356754 | 0 | 0    | 0      | A |
| 9 | BICF2G630826474         | 20366553 | A | 0.5  | 0.4286 | G |
| 9 | BICF2G630826442         | 20380295 | C | 0.5  | 0.5    | A |
| 9 | TIGRP2P242635_rs8589686 | 20412531 | A | 0    | 0.2857 | G |
| 9 | BICF2P1111611           | 20430110 | G | 0    | 0      | A |
| 9 | BICF2G630826358         | 20441112 | A | 0    | 0      | G |
| 9 | BICF2G630826342         | 20447278 | G | 0.5  | 0.2143 | A |
| 9 | BICF2G630826273         | 20470039 | G | 0.25 | 0.1429 | A |
| 9 | TIGRP2P242653_rs8823067 | 20484009 | C | 0    | 0      | A |
| 9 | BICF2G630826217         | 20493330 | A | 0.75 | 0.8571 | G |
| 9 | BICF2G630826205         | 20505413 | G | 0.5  | 0.2143 | A |
| 9 | BICF2G630826164         | 20521826 | G | 0.25 | 0.6429 | A |
| 9 | BICF2P51045             | 20528057 | C | 0.5  | 0.2143 | A |
| 9 | BICF2G630826123         | 20541124 | G | 0    | 0.2857 | A |
| 9 | BICF2G630826093         | 20553703 | A | 0    | 0      | G |
| 9 | TIGRP2P242690_rs8796343 | 20565461 | G | 0    | 0.2857 | A |
| 9 | BICF2G630826078         | 20574759 | A | 0.25 | 0.1429 | G |
| 9 | BICF2G630826047         | 20602144 | A | 0.25 | 0.1429 | G |
| 9 | BICF2G630826017         | 20610786 | A | 0.75 | 0.8571 | C |
| 9 | BICF2G630825929         | 20644585 | G | 0.25 | 0.3571 | A |
| 9 | BICF2P1359973           | 20656485 | A | 0.25 | 0.1429 | G |
| 9 | TIGRP2P242759_rs8583903 | 20666029 | C | 0.5  | 0.2143 | A |
| 9 | BICF2P983534            | 20677357 | G | 0.75 | 0.6429 | A |
| 9 | BICF2G630825838         | 20690073 | G | 0    | 0      | A |
| 9 | TIGRP2P242797_rs9239106 | 20700190 | G | 0    | 0.2857 | A |
| 9 | BICF2G630825760         | 20714828 | G | 0.5  | 0.5    | A |
| 9 | BICF2G630825718         | 20723832 | A | 0    | 0      | G |
| 9 | TIGRP2P242819_rs8962883 | 20735845 | G | 0.5  | 0.2143 | A |
| 9 | BICF2G630825632         | 20747803 | G | 0    | 0.3571 | A |
| 9 | TIGRP2P242837_rs8524452 | 20769796 | 0 | 0    | 0      | G |
| 9 | BICF2G630825531         | 20787714 | G | 0    | 0      | A |
| 9 | BICF2G630825518         | 20793073 | A | 0.5  | 0.2143 | G |
| 9 | BICF2S2444016           | 20807279 | G | 0    | 0      | A |
| 9 | BICF2G630825471         | 20819536 | A | 0    | 0      | G |
| 9 | BICF2G630825448         | 20826863 | A | 0    | 0      | G |
| 9 | BICF2S22944095          | 20850819 | A | 0.5  | 0.5    | G |

|   |                         |          |   |      |        |   |
|---|-------------------------|----------|---|------|--------|---|
| 9 | BICF2G630825326         | 20875345 | G | 0.5  | 0.5    | A |
| 9 | BICF2P1396747           | 20884865 | G | 0.25 | 0.6429 | A |
| 9 | BICF2G630825278         | 20896695 | G | 0    | 0      | A |
| 9 | BICF2G630825255         | 20912570 | G | 0    | 0      | A |
| 9 | BICF2G630825243         | 20922135 | A | 0.25 | 0.1429 | C |
| 9 | BICF2G630825050         | 21045322 | G | 0    | 0      | A |
| 9 | BICF2S22923116          | 21091441 | A | 0    | 0      | G |
| 9 | BICF2G630824932         | 21137140 | A | 0.25 | 0.2857 | G |
| 9 | BICF2P269342            | 21525613 | A | 0.25 | 0.1429 | C |
| 9 | BICF2G630828735         | 21539215 | A | 0.25 | 0.3571 | C |
| 9 | BICF2G630828744         | 21543628 | A | 0.25 | 0.3571 | G |
| 9 | BICF2G630828753         | 21573958 | A | 0.5  | 0.2143 | G |
| 9 | BICF2P1355037           | 21578312 | 0 | 0    | 0      | A |
| 9 | BICF2P476836            | 21647281 | 0 | 0    | 0      | G |
| 9 | TIGRP2P123761_rs8879961 | 21661777 | 0 | 0    | 0      | T |
| 9 | BICF2P618079            | 21696907 | G | 0.25 | 0.1429 | A |
| 9 | BICF2P1414933           | 21701189 | A | 0    | 0      | G |
| 9 | TIGRP2P123765_rs9028924 | 21718690 | A | 0    | 0      | G |
| 9 | BICF2S23552249          | 21731401 | 0 | 0    | 0      | G |
| 9 | BICF2P1357714           | 21737302 | A | 0.25 | 0.1429 | C |
| 9 | BICF2P56992             | 21750414 | A | 0.25 | 0.1429 | G |
| 9 | BICF2P1468538           | 21759557 | G | 0.5  | 0.5    | A |
| 9 | BICF2P609918            | 21793981 | A | 0.5  | 0.5    | C |
| 9 | TIGRP2P123790_rs9215392 | 21809381 | G | 0.25 | 0.1429 | A |
| 9 | BICF2S23143878          | 21819076 | G | 0.25 | 0.3571 | A |
| 9 | BICF2P963495            | 21839275 | A | 0    | 0      | G |
| 9 | BICF2P940856            | 21852767 | G | 0.25 | 0.3571 | A |
| 9 | BICF2P1304251           | 21870640 | G | 0    | 0      | A |
| 9 | BICF2P577436            | 21878369 | A | 0.25 | 0.1429 | G |
| 9 | BICF2P18565             | 21885345 | A | 0    | 0      | G |
| 9 | BICF2P1105875           | 21896243 | A | 0    | 0      | G |
| 9 | BICF2P1424692           | 21917749 | A | 0.5  | 0.5    | G |
| 9 | BICF2P659282            | 21919855 | A | 0.5  | 0.5    | G |
| 9 | TIGRP2P123815_rs8599056 | 21933263 | A | 0.5  | 0.5    | G |
| 9 | TIGRP2P123820_rs8992933 | 21939723 | G | 0.5  | 0.5    | A |
| 9 | BICF2P791911            | 21946688 | G | 0.5  | 0.5    | A |
| 9 | BICF2P791912            | 21946767 | A | 0.5  | 0.5    | C |
| 9 | TIGRP2P123841_rs8731442 | 21950647 | G | 0.5  | 0.5    | A |
| 9 | BICF2P740053            | 21961172 | 0 | 0    | 0      | A |
| 9 | BICF2P820321            | 22000980 | 0 | 0    | 0      | A |
| 9 | BICF2P186635            | 22014238 | 0 | 0    | 0      | A |
| 9 | BICF2P1314088           | 22037692 | C | 0.25 | 0.3571 | G |
| 9 | TIGRP2P123851_rs8621678 | 22042123 | G | 0    | 0      | A |
| 9 | TIGRP2P123852_rs8810572 | 22050265 | 0 | 0    | 0      | C |
| 9 | BICF2P1297471           | 22089287 | 0 | 0    | 0      | A |
| 9 | BICF2P3451              | 22100598 | G | 0.25 | 0.1429 | A |
| 9 | BICF2S23633704          | 22105423 | C | 0.25 | 0.1429 | A |

|   |                         |          |   |      |         |   |
|---|-------------------------|----------|---|------|---------|---|
| 9 | BICF2P85786             | 22131423 | A | 0    | 0       | G |
| 9 | BICF2P441438            | 22147511 | 0 | 0    | 0       | G |
| 9 | BICF2P1456283           | 22161139 | 0 | 0    | 0       | A |
| 9 | BICF2P497909            | 22194543 | 0 | 0    | 0       | A |
| 9 | BICF2P391589            | 22196559 | G | 0    | 0       | A |
| 9 | BICF2G630828780         | 22222259 | A | 0    | 0       | G |
| 9 | BICF2P582791            | 22233163 | A | 0    | 0       | G |
| 9 | BICF2P992151            | 22246826 | G | 0    | 0       | A |
| 9 | TIGRP2P123872_rs8637978 | 22257706 | G | 0    | 0       | A |
| 9 | BICF2P1131017           | 22277662 | A | 0    | 0       | T |
| 9 | BICF2P558323            | 22287218 | 0 | 0    | 0       | T |
| 9 | BICF2P1388616           | 22306903 | 0 | 0    | 0       | G |
| 9 | TIGRP2P123879_rs9131016 | 22341741 | A | 0    | 0       | C |
| 9 | BICF2P615176            | 22351530 | 0 | 0    | 0       | A |
| 9 | TIGRP2P123881_rs8984665 | 22360957 | G | 0    | 0       | C |
| 9 | BICF2P849769            | 22376001 | A | 0.75 | 0.5714  | G |
| 9 | BICF2G630828809         | 22381705 | A | 0.25 | 0.1429  | G |
| 9 | BICF2G630828813         | 22398816 | A | 0    | 0       | G |
| 9 | BICF2G630828830         | 22412658 | C | 0.75 | 0.5714  | A |
| 9 | BICF2S23441603          | 22420035 | A | 0    | 0       | G |
| 9 | BICF2S23037587          | 22433027 | 0 | 0    | 0       | G |
| 9 | BICF2G630828851         | 22448011 | A | 1    | 1       | G |
| 9 | BICF2G630828858         | 22460534 | A | 0.75 | 0.8571  | G |
| 9 | BICF2S23051664          | 22493625 | A | 0    | 0.08333 | C |
| 9 | BICF2P941484            | 22504342 | G | 0.25 | 0.1429  | A |
| 9 | BICF2S22958957          | 22508466 | G | 0    | 0       | A |
| 9 | TIGRP2P123899_rs8774420 | 22518122 | C | 0.5  | 0.5     | A |
| 9 | BICF2P867366            | 22535218 | G | 0    | 0       | A |
| 9 | TIGRP2P123907_rs8848012 | 22557059 | 0 | 0    | 0       | C |
| 9 | TIGRP2P123909_rs9132640 | 22565788 | 0 | 0    | 0       | C |
| 9 | TIGRP2P123911_rs8810000 | 22581460 | C | 0    | 0       | G |
| 9 | BICF2P492809            | 22586483 | A | 0.5  | 0.2143  | G |
| 9 | BICF2P723418            | 22601503 | A | 0.5  | 0.2143  | G |
| 9 | BICF2S23158543          | 22617041 | A | 0.75 | 0.3571  | G |
| 9 | BICF2G630828863         | 22630713 | G | 0.75 | 0.3571  | A |
| 9 | BICF2G630828866         | 22640123 | G | 0.75 | 0.3571  | A |
| 9 | BICF2P292223            | 22662515 | A | 0    | 0       | G |
| 9 | BICF2P714444            | 22670299 | A | 0    | 0       | G |
| 9 | BICF2G630828883         | 22685746 | A | 0.25 | 0.6429  | G |
| 9 | BICF2G630828895         | 22699962 | G | 0.5  | 0.2143  | A |
| 9 | BICF2S24416201          | 22701428 | G | 0.5  | 0.2143  | A |
| 9 | BICF2P363133            | 22706912 | C | 0.25 | 0.3571  | A |
| 9 | BICF2P380222            | 22712583 | A | 0    | 0       | C |
| 9 | BICF2P8441              | 22724095 | A | 0.25 | 0.3333  | G |
| 9 | BICF2G630828921         | 22727390 | G | 0    | 0       | A |
| 9 | BICF2P329696            | 22741546 | A | 0.5  | 0.5     | G |
| 9 | BICF2G630828937         | 22767770 | C | 0.5  | 0.1667  | A |



|   |                         |          |   |      |        |   |
|---|-------------------------|----------|---|------|--------|---|
| 9 | BICF2G630828944         | 22777441 | G | 0.5  | 0.2143 | A |
| 9 | BICF2G630828948         | 22781124 | G | 0    | 0      | A |
| 9 | BICF2G630828965         | 22785958 | G | NA   | 0.2143 | A |
| 9 | BICF2G630828984         | 22797690 | A | 0    | 0      | C |
| 9 | BICF2P821700            | 22810572 | A | 1    | 1      | G |
| 9 | BICF2G630829005         | 22818895 | C | 0    | 0      | A |
| 9 | BICF2P1312098           | 22832737 | G | 0.5  | 0.7857 | A |
| 9 | BICF2G630829021         | 22850256 | G | 0.25 | 0.3571 | A |
| 9 | BICF2G630829029         | 22857020 | A | 0.25 | 0.3571 | G |
| 9 | BICF2G630829041         | 22873028 | A | 0    | 0      | G |
| 9 | BICF2G630829045         | 22884979 | C | 0.5  | 0.2143 | A |
| 9 | BICF2P1223020           | 22885889 | A | 0.5  | 0.2143 | G |
| 9 | BICF2G630829068         | 22912096 | A | 0.25 | 0.4286 | G |
| 9 | BICF2S23029957          | 22921303 | A | 0    | 0.2857 | C |
| 9 | TIGRP2P123959_rs8806695 | 22941383 | 0 | 0    | 0      | G |
| 9 | BICF2G630829086         | 22942557 | G | 0.75 | 0.3571 | A |
| 9 | BICF2G630829096         | 22959422 | A | 0    | 0      | T |
| 9 | BICF2G630829101         | 22963830 | A | 0    | 0      | G |
| 9 | BICF2G630829112         | 22980345 | A | 0    | 0      | G |
| 9 | BICF2P642964            | 22995539 | A | 0    | 0      | G |
| 9 | BICF2G630829127         | 23001093 | G | 0    | 0      | A |
| 9 | BICF2S23451292          | 23012870 | A | 0.25 | 0.7    | C |
| 9 | BICF2G630829144         | 23045640 | G | 0    | 0      | A |
| 9 | BICF2P1025331           | 23070810 | 0 | 0    | 0      | G |
| 9 | BICF2S23444144          | 23086835 | G | 1    | 0.7143 | A |
| 9 | BICF2G630829196         | 23094892 | G | 1    | 0.3571 | A |
| 9 | BICF2G630829204         | 23113811 | G | 0.25 | 0.3571 | A |
| 9 | BICF2G630829205         | 23116608 | A | 0.75 | 0.3571 | G |
| 9 | BICF2G630829215         | 23129335 | A | 0.75 | 0.3571 | G |
| 9 | BICF2G630829234         | 23138891 | C | 0.25 | 0.3571 | A |
| 9 | BICF2G630829262         | 23151538 | G | 0.25 | 0.3571 | A |
| 9 | BICF2G630829277         | 23162898 | A | 0.75 | 0.3571 | G |
| 9 | BICF2G630829300         | 23173104 | A | 0.75 | 0.6429 | G |
| 9 | BICF2G630829395         | 23228818 | C | 0.75 | 0.3571 | A |
| 9 | BICF2G630829405         | 23234904 | G | 0.75 | 0.6429 | A |
| 9 | TIGRP2P124009_rs8740102 | 23242605 | 0 | 0    | 0      | G |
| 9 | BICF2G630829424         | 23254532 | G | 0.75 | 0.3571 | A |
| 9 | BICF2G630829443         | 23276058 | A | 0.75 | 0.6429 | G |
| 9 | BICF2P325128            | 23297061 | 0 | 0    | 0      | T |
| 9 | BICF2G630829453         | 23306247 | A | 0.25 | 0.3571 | G |
| 9 | BICF2G630829454         | 23311685 | C | 0.75 | 0.3571 | G |
| 9 | TIGRP2P124011_rs8818058 | 23328710 | 0 | 0    | 0      | C |
| 9 | BICF2S23528120          | 23345924 | A | 0    | 0      | G |
| 9 | G550f59S47              | 23370058 | 0 | 0    | 0      | C |
| 9 | BICF2G630829457         | 23399439 | A | 0.75 | 0.3571 | G |
| 9 | BICF2P133297            | 23429501 | 0 | 0    | 0      | A |
| 9 | BICF2P389760            | 23452689 | 0 | 0    | 0      | A |

|   |                         |          |   |      |         |   |
|---|-------------------------|----------|---|------|---------|---|
| 9 | BICF2P1019239           | 23471244 | 0 | 0    | 0       | A |
| 9 | BICF2P173999            | 23499012 | 0 | 0    | 0       | G |
| 9 | BICF2G630829465         | 23528122 | G | 0    | 0       | C |
| 9 | BICF2G630829467         | 23534385 | G | 0    | 0       | C |
| 9 | BICF2S22948024          | 23568615 | A | 0    | 0       | G |
| 9 | BICF2P212537            | 23589529 | C | 0.25 | 0.1429  | A |
| 9 | BICF2S23727301          | 23604135 | T | 0    | 0       | A |
| 9 | BICF2P77510             | 23620883 | A | 0.75 | 0.3571  | G |
| 9 | BICF2S23254549          | 23622692 | A | 0    | 0       | G |
| 9 | BICF2P1093967           | 23662144 | G | 0.75 | 0.3571  | A |
| 9 | BICF2S23658597          | 23689031 | A | 0    | 0       | G |
| 9 | BICF2P303481            | 23703650 | A | 0.25 | 0.3571  | G |
| 9 | BICF2S23516143          | 23723202 | G | 0    | 0       | A |
| 9 | BICF2P453612            | 23734065 | G | 0    | 0       | A |
| 9 | TIGRP2P124013_rs9085715 | 23746629 | 0 | 0    | 0       | G |
| 9 | BICF2P697479            | 23753178 | 0 | 0    | 0       | A |
| 9 | BICF2P497189            | 23763978 | 0 | 0    | 0       | A |
| 9 | BICF2P1252024           | 23804368 | 0 | 0    | 0       | G |
| 9 | BICF2S24118055          | 23805503 | G | 0    | 0.2857  | A |
| 9 | BICF2S23152399          | 23823551 | A | 0.25 | 0.3333  | G |
| 9 | BICF2G630829471         | 23859332 | G | 0.5  | 0.5     | A |
| 9 | BICF2G630829486         | 23888623 | A | 0.5  | 0.5     | G |
| 9 | BICF2G630829491         | 23898065 | G | 0.5  | 0.5     | A |
| 9 | BICF2G630829506         | 23917868 | G | 0.5  | 0.5     | C |
| 9 | BICF2G630829511         | 23926104 | G | 0.5  | 0.5     | A |
| 9 | BICF2G630829536         | 23945615 | A | 0.25 | 0.1429  | C |
| 9 | BICF2G630829543         | 23957304 | G | 0    | 0       | A |
| 9 | BICF2G630829545         | 23959081 | T | 0    | 0       | A |
| 9 | BICF2G630829548         | 23972204 | G | 0.25 | 0.1429  | A |
| 9 | BICF2G630829567         | 23988807 | G | 0.25 | 0.1429  | A |
| 9 | BICF2G630829571         | 23994085 | A | 0.25 | 0.1429  | C |
| 9 | BICF2P879969            | 24004132 | G | 0.25 | 0.1429  | A |
| 9 | BICF2P1060501           | 24043213 | 0 | 0    | 0       | A |
| 9 | BICF2G630829633         | 24075552 | A | 0    | 0.1429  | G |
| 9 | BICF2P351904            | 24084144 | G | 0.25 | 0.1429  | A |
| 9 | BICF2G630829650         | 24084709 | A | 0.25 | 0.08333 | G |
| 9 | BICF2G630829655         | 24092520 | A | 0.25 | 0.1429  | G |
| 9 | BICF2G630829666         | 24108127 | G | 0.25 | 0.1429  | A |
| 9 | BICF2G630829677         | 24120331 | A | 0    | 0       | G |
| 9 | BICF2P428480            | 24142916 | A | 1    | 1       | G |
| 9 | BICF2P660167            | 24159667 | G | 0    | 0       | A |
| 9 | BICF2P725553            | 24162720 | G | 0.5  | 0.5     | A |
| 9 | BICF2G630829731         | 24182629 | G | 0    | 0.2857  | A |
| 9 | BICF2P402231            | 24185190 | A | 0    | 0       | G |
| 9 | BICF2G630829749         | 24196811 | C | 0    | 0       | A |
| 9 | BICF2G630829767         | 24215414 | A | 0.25 | 0.4286  | G |
| 9 | BICF2G630829769         | 24216290 | G | 0.25 | 0.4286  | A |

|   |                         |          |   |      |        |   |
|---|-------------------------|----------|---|------|--------|---|
| 9 | BICF2G630829785         | 24228637 | G | 0    | 0.2857 | A |
| 9 | BICF2G630829791         | 24231063 | A | 0    | 0.2857 | G |
| 9 | BICF2G630829816         | 24259926 | A | 0.5  | 0.7857 | G |
| 9 | BICF2G630829823         | 24268076 | G | 0.25 | 0.6429 | A |
| 9 | BICF2G630829847         | 24285712 | G | 0.5  | 0.7857 | A |
| 9 | BICF2G630829855         | 24288729 | A | 0.5  | 0.7857 | G |
| 9 | BICF2G630829860         | 24303534 | A | 0.25 | 0.6429 | G |
| 9 | BICF2G630829871         | 24314372 | A | 0    | 0      | G |
| 9 | BICF2P966048            | 24323235 | A | 0.75 | 0.3571 | G |
| 9 | BICF2G630829890         | 24336528 | A | 0.75 | 0.8571 | G |
| 9 | BICF2G630829924         | 24357721 | A | 0.5  | 0.7857 | G |
| 9 | BICF2S23714360          | 24371654 | A | 0.25 | 0.1429 | G |
| 9 | BICF2G630829929         | 24387035 | G | 0.25 | 0.1429 | A |
| 9 | BICF2G630829931         | 24402772 | G | 0.75 | 0.8571 | A |
| 9 | BICF2G630829939         | 24404993 | C | 0.75 | 0.8571 | G |
| 9 | BICF2G630829972         | 24420447 | C | 0.75 | 0.8571 | G |
| 9 | BICF2G630829989         | 24433084 | G | 0.25 | 0.1429 | A |
| 9 | TIGRP2P124059_rs9165827 | 24442502 | A | 0    | 0      | G |
| 9 | BICF2G630830026         | 24470605 | G | 0    | 0      | C |
| 9 | BICF2S23610261          | 24483476 | A | 0    | 0      | C |
| 9 | BICF2G630830079         | 24504811 | A | 0.25 | 0.6429 | G |
| 9 | BICF2G630830086         | 24508076 | A | 0.25 | 0.6429 | G |
| 9 | BICF2G630830097         | 24526676 | G | 0    | 0      | A |
| 9 | BICF2G630830099         | 24551999 | A | 0.5  | 0.8    | G |
| 9 | BICF2P1289819           | 24555446 | A | 0    | 0      | C |
| 9 | BICF2G630830103         | 24565397 | G | 0.5  | 0.2143 | A |
| 9 | BICF2G630830107         | 24580506 | A | 0.5  | 0.2143 | G |
| 9 | BICF2G630830121         | 24588355 | G | 0.5  | 0.2143 | A |
| 9 | BICF2G630830173         | 24617133 | A | 0.5  | 0.2143 | G |
| 9 | BICF2S23646886          | 24624254 | G | 0.5  | 0.2143 | A |
| 9 | BICF2G630830191         | 24634142 | G | 0    | 0      | A |
| 9 | BICF2G630830198         | 24644890 | G | 0    | 0      | A |
| 9 | BICF2G630830207         | 24685027 | 0 | 0    | 0      | A |
| 9 | BICF2G630830212         | 24710869 | 0 | 0    | 0      | G |
| 9 | BICF2G630830213         | 24720152 | G | 0.5  | 0.7857 | C |
| 9 | BICF2G630830216         | 24734483 | C | 0    | 0      | A |
| 9 | BICF2P963953            | 24740805 | A | 0.5  | 0.2143 | G |
| 9 | BICF2P558193            | 24792107 | 0 | 0    | 0      | A |
| 9 | BICF2S23024789          | 24807179 | C | 0    | 0      | A |
| 9 | BICF2G630830278         | 24875437 | G | 0    | 0      | A |
| 9 | BICF2G630830300         | 24904622 | G | 0    | 0      | A |
| 9 | BICF2G630830308         | 24916897 | A | 0    | 0      | G |
| 9 | BICF2G630830309         | 24922431 | A | 0    | 0      | C |
| 9 | BICF2G630830340         | 24953383 | T | 0    | 0      | A |
| 9 | BICF2G630830352         | 24958282 | G | 0    | 0      | A |
| 9 | BICF2P579865            | 24967625 | 0 | 0    | 0      | A |
| 9 | BICF2G630830371         | 24980440 | A | 0    | 0      | G |

|   |                         |          |   |     |        |   |
|---|-------------------------|----------|---|-----|--------|---|
| 9 | BICF2S23628342          | 25018265 | A | 0   | 0      | C |
| 9 | BICF2G630830408         | 25024922 | A | 0   | 0      | G |
| 9 | BICF2G630830420         | 25040286 | A | 0   | 0      | G |
| 9 | BICF2G630830438         | 25060516 | A | 1   | 1      | G |
| 9 | BICF2G630830449         | 25071652 | A | 1   | 1      | G |
| 9 | BICF2G630830460         | 25088625 | C | 1   | 1      | A |
| 9 | BICF2G630830471         | 25096586 | G | 1   | 1      | A |
| 9 | TIGRP2P124142_rs8626943 | 25108271 | 0 | 0   | 0      | A |
| 9 | BICF2G630830491         | 25121473 | A | 0   | 0      | G |
| 9 | BICF2G630830504         | 25131473 | G | 1   | 1      | A |
| 9 | BICF2G630830523         | 25141939 | A | 1   | 1      | G |
| 9 | BICF2G630830534         | 25150886 | A | 1   | 1      | G |
| 9 | BICF2G630830550         | 25164722 | A | 1   | 1      | G |
| 9 | BICF2G630830554         | 25178793 | G | 1   | 1      | A |
| 9 | BICF2P528965            | 25189885 | 0 | 0   | 0      | G |
| 9 | TIGRP2P124155_rs9031693 | 25202544 | 0 | 0   | 0      | C |
| 9 | TIGRP2P124156_rs8632740 | 25208636 | 0 | 0   | 0      | C |
| 9 | BICF2G630830605         | 25230086 | A | 0   | 0      | G |
| 9 | BICF2G630830616         | 25251644 | A | 1   | 1      | C |
| 9 | BICF2G630830621         | 25256521 | A | 1   | 1      | G |
| 9 | BICF2G630830625         | 25268414 | G | 0   | 0      | A |
| 9 | BICF2G630830641         | 25290771 | C | 0   | 0.2857 | A |
| 9 | BICF2P264572            | 25312928 | A | 0   | 0      | C |
| 9 | TIGRP2P124173_rs9164818 | 25327939 | G | 0   | 0      | A |
| 9 | BICF2G630830696         | 25335873 | G | 0   | 0.2857 | A |
| 9 | BICF2G630830721         | 25355058 | G | 0   | 0      | A |
| 9 | BICF2G630830724         | 25357630 | A | 0   | 0      | G |
| 9 | BICF2G630830740         | 25369911 | A | 0   | 0      | G |
| 9 | BICF2G630830755         | 25376656 | A | 1   | 0.75   | G |
| 9 | BICF2G630830760         | 25384741 | A | 0   | 0.2857 | G |
| 9 | BICF2G630830771         | 25409162 | A | 1   | 0.7143 | C |
| 9 | BICF2G630830779         | 25415115 | G | 1   | 0.7143 | A |
| 9 | TIGRP2P124180_rs8909833 | 25426576 | A | 0   | 0      | G |
| 9 | BICF2G630830815         | 25440794 | G | 0.5 | 0.5    | A |
| 9 | BICF2G630830832         | 25455859 | A | 0   | 0      | G |
| 9 | BICF2G630830847         | 25459799 | A | 0.5 | 0.5    | G |
| 9 | BICF2P699631            | 25465743 | A | 1   | 0.7143 | G |
| 9 | BICF2G630830858         | 25490319 | A | 0.5 | 0.5    | G |
| 9 | BICF2G630830862         | 25497972 | G | 0.5 | 0.5    | A |
| 9 | BICF2G630830864         | 25507570 | G | 0.5 | 0.5    | A |
| 9 | BICF2G630830882         | 25518774 | G | 0.5 | 0.5    | A |
| 9 | BICF2G630830893         | 25528854 | A | 0.5 | 0.1667 | G |
| 9 | TIGRP2P124202_rs8835099 | 25542291 | A | 0   | 0      | G |
| 9 | BICF2P1125027           | 25558276 | G | 0.5 | 0.5    | A |
| 9 | TIGRP2P124216_rs8925245 | 25577947 | C | 0.5 | 0.2143 | A |
| 9 | TIGRP2P124221_rs8939112 | 25590650 | G | 0   | 0      | A |
| 9 | BICF2S23232639          | 25615599 | A | 0.5 | 0.5    | G |

|   |                         |          |   |      |        |   |
|---|-------------------------|----------|---|------|--------|---|
| 9 | BICF2G630830906         | 25624089 | C | 0    | 0.2857 | A |
| 9 | BICF2G630830911         | 25634815 | A | 0    | 0.2857 | G |
| 9 | BICF2S23652010          | 25650033 | A | 0    | 0      | G |
| 9 | BICF2P627713            | 25665005 | 0 | 0    | 0      | C |
| 9 | TIGRP2P124231_rs8854848 | 25699993 | C | 0.5  | 0.5    | A |
| 9 | BICF2P506723            | 25710036 | A | 0.5  | 0.5    | C |
| 9 | BICF2P4949              | 25744551 | G | 0    | 0      | C |
| 9 | BICF2P455370            | 25757485 | 0 | 0    | 0      | A |
| 9 | BICF2G630830925         | 25764104 | 0 | 0    | 0      | G |
| 9 | BICF2S23016495          | 25816551 | G | 0.25 | 0.4286 | A |
| 9 | BICF2S23237535          | 25823015 | G | 0.25 | 0.4286 | C |
| 9 | BICF2G630830951         | 25851498 | G | 0.25 | 0.4286 | A |
| 9 | BICF2G630830958         | 25855647 | G | 0.25 | 0.4167 | A |
| 9 | BICF2G630830963         | 25864174 | A | 0.25 | 0.1429 | G |
| 9 | BICF2P1251768           | 25879379 | G | 0.5  | 0.5    | A |
| 9 | BICF2G630830984         | 25899629 | A | 0.5  | 0.7857 | G |
| 9 | BICF2S22932191          | 25906138 | G | 0    | 0      | A |
| 9 | BICF2P37637             | 25910552 | G | 1    | 0.7143 | C |
| 9 | BICF2S2355667           | 25930358 | G | 0.5  | 0.8333 | A |
| 9 | BICF2P1010945           | 25937903 | G | 0.25 | 0.3571 | A |
| 9 | BICF2G630830989         | 25938768 | A | 0.75 | 0.3571 | G |
| 9 | BICF2P864411            | 25953349 | 0 | 0    | 0      | G |
| 9 | BICF2P580907            | 25990782 | G | 0.25 | 0.3571 | A |
| 9 | BICF2P607508            | 26012915 | G | 0    | 0      | A |
| 9 | BICF2P289987            | 26016325 | A | 0    | 0      | G |
| 9 | BICF2P705707            | 26027962 | A | 0    | 0      | G |
| 9 | BICF2S2306419           | 26040886 | G | 0.25 | 0.3333 | A |
| 9 | BICF2P688692            | 26051453 | T | 0.25 | 0.3571 | A |
| 9 | TIGRP2P124282_rs8640740 | 26072168 | A | 0.25 | 0.3571 | G |
| 9 | BICF2G630831000         | 26093362 | A | 0.75 | 0.3571 | G |
| 9 | BICF2P663036            | 26106235 | 0 | 0    | 0      | C |
| 9 | BICF2G630831008         | 26109694 | G | 0    | 0.2857 | A |
| 9 | BICF2P1205826           | 26114488 | G | 0.25 | 0.3571 | A |
| 9 | BICF2G630831015         | 26121963 | 0 | 0    | 0      | G |
| 9 | BICF2G630831019         | 26139355 | A | 1    | 1      | G |
| 9 | TIGRP2P124286_rs9091783 | 26151145 | G | 0    | 0      | A |
| 9 | BICF2G630831046         | 26181509 | A | 0    | 0      | G |
| 9 | BICF2P746905            | 26188838 | A | 0.5  | 0.2143 | G |
| 9 | BICF2G630831049         | 26199912 | G | 0.5  | 0.2143 | A |
| 9 | BICF2G630831058         | 26209122 | G | 0.5  | 0.2143 | A |
| 9 | BICF2S2315732           | 26227162 | C | 0    | 0.2857 | A |
| 9 | BICF2P813098            | 26232743 | G | 0    | 0.2857 | A |
| 9 | BICF2P794912            | 26244447 | 0 | 0    | 0      | C |
| 9 | BICF2S22919096          | 26274409 | A | 0    | 0      | G |
| 9 | BICF2S22946125          | 26322258 | A | 1    | 1      | G |
| 9 | TIGRP2P124304_rs9042104 | 26329064 | 0 | 0    | 0      | A |
| 9 | TIGRP2P124309_rs9015099 | 26340367 | 0 | 0    | 0      | G |

|   |                         |          |   |   |        |   |
|---|-------------------------|----------|---|---|--------|---|
| 9 | BICF2P384854            | 26357653 | G | 0 | 0.25   | A |
| 9 | BICF2G630831107         | 26360304 | G | 0 | 0      | A |
| 9 | BICF2P278442            | 26370694 | 0 | 0 | 0      | G |
| 9 | BICF2P173659            | 26389328 | 0 | 0 | 0      | G |
| 9 | BICF2P1412478           | 26398116 | A | 0 | 0.2857 | G |
| 9 | BICF2G630831119         | 26405611 | G | 0 | 0      | A |
| 9 | BICF2P1359837           | 26417028 | A | 0 | 0.2857 | G |
| 9 | TIGRP2P124347_rs8886420 | 26434299 | A | 0 | 0.2857 | G |
| 9 | BICF2G630831149         | 26445030 | A | 0 | 0      | G |
| 9 | BICF2G630831152         | 26450306 | G | 0 | 0.2857 | A |
| 9 | BICF2G630831164         | 26468685 | G | 0 | 0      | A |
| 9 | BICF2G630831184         | 26484422 | A | 0 | 0      | G |
| 9 | BICF2G630831187         | 26486576 | C | 0 | 0      | A |
| 9 | BICF2P621233            | 26507994 | 0 | 0 | 0      | C |
| 9 | BICF2P176617            | 26529113 | A | 1 | 0.7143 | G |
| 9 | BICF2G630831204         | 26552446 | A | 0 | 0.2857 | G |
| 9 | BICF2G630831212         | 26576269 | A | 0 | 0.2857 | G |
| 9 | BICF2G630831224         | 26584969 | A | 0 | 0      | G |
| 9 | BICF2G630831238         | 26593370 | G | 0 | 0      | A |
| 9 | BICF2S23723946          | 26614016 | A | 0 | 0      | G |
| 9 | BICF2G630831282         | 26630902 | C | 1 | 0.7143 | A |
| 9 | BICF2G630831290         | 26638202 | A | 0 | 0.2857 | G |
| 9 | BICF2P71713             | 26654410 | 0 | 0 | 0      | C |
| 9 | BICF2G630831294         | 26661727 | A | 0 | 0      | G |
| 9 | BICF2G630831297         | 26679172 | A | 1 | 1      | G |
| 9 | BICF2G630831299         | 26680259 | C | 1 | 1      | A |
| 9 | BICF2P1248103           | 26696255 | A | 0 | 0      | G |
| 9 | BICF2P939832            | 26713984 | C | 0 | 0.2857 | G |
| 9 | BICF2G630831332         | 26723332 | G | 0 | 0      | A |
| 9 | BICF2G630831334         | 26735433 | G | 0 | 0      | A |
| 9 | BICF2G630831351         | 26755116 | A | 0 | 0      | G |
| 9 | BICF2G630831361         | 26764743 | G | 1 | 1      | A |
| 9 | BICF2G630831376         | 26788271 | A | 0 | 0      | G |
| 9 | BICF2G630831382         | 26796538 | G | 1 | 1      | A |
| 9 | BICF2G630831384         | 26810040 | A | 0 | 0      | G |
| 9 | BICF2G630831400         | 26824471 | A | 0 | 0      | C |
| 9 | BICF2P390809            | 26846696 | 0 | 0 | 0      | C |
| 9 | BICF2P139463            | 26854709 | A | 0 | 0      | G |
| 9 | BICF2G630831433         | 26880751 | G | 0 | 0      | A |
| 9 | BICF2P192056            | 26892870 | G | 0 | 0      | A |
| 9 | BICF2G630831471         | 26916258 | A | 0 | 0      | G |
| 9 | BICF2P301856            | 26922036 | A | 1 | 1      | G |
| 9 | BICF2P1364626           | 26940018 | 0 | 0 | 0      | G |
| 9 | BICF2G630831487         | 26955304 | G | 0 | 0      | A |
| 9 | BICF2G630831488         | 26956032 | G | 0 | 0      | A |
| 9 | BICF2G630831495         | 26973512 | A | 0 | 0      | G |
| 9 | BICF2P226153            | 26985628 | 0 | 0 | 0      | G |

|   |                         |          |   |      |        |   |
|---|-------------------------|----------|---|------|--------|---|
| 9 | BICF2G630831525         | 26991295 | 0 | 0    | 0      | G |
| 9 | BICF2P1304179           | 27003897 | A | 0    | 0      | G |
| 9 | BICF2G630831532         | 27016091 | A | 0    | 0      | G |
| 9 | TIGRP2P124405_rs9151782 | 27030574 | 0 | 0    | 0      | G |
| 9 | BICF2G630831560         | 27037603 | 0 | 0    | 0      | A |
| 9 | BICF2P989771            | 27058611 | A | 0.5  | 0.5    | G |
| 9 | BICF2P94801             | 27066033 | G | 0.5  | 0.5    | A |
| 9 | BICF2P155824            | 27077993 | 0 | 0    | 0      | C |
| 9 | BICF2G630831588         | 27085898 | C | 0    | 0      | A |
| 9 | BICF2G630831594         | 27116097 | G | 0    | 0      | A |
| 9 | BICF2G630831601         | 27137673 | 0 | 0    | 0      | G |
| 9 | BICF2S22935109          | 27144527 | G | 0.25 | 0.4286 | A |
| 9 | TIGRP2P124409_rs8770636 | 27168219 | A | 0.25 | 0.4286 | G |
| 9 | BICF2P1334700           | 27175995 | A | 0    | 0      | G |
| 9 | BICF2G630831617         | 27189135 | A | 0.25 | 0.4286 | G |
| 9 | BICF2G630831621         | 27204161 | 0 | 0    | 0      | G |
| 9 | BICF2G630831662         | 27234905 | 0 | 0    | 0      | G |
| 9 | BICF2G630831679         | 27262545 | 0 | 0    | 0      | G |
| 9 | BICF2G630831687         | 27268119 | 0 | 0    | 0      | A |
| 9 | BICF2G630831702         | 27282342 | G | 0.75 | 0.5714 | A |
| 9 | BICF2P585321            | 27293217 | A | 0.5  | 0.2143 | G |
| 9 | TIGRP2P124416_rs8499045 | 27302043 | A | 0    | 0      | G |
| 9 | BICF2P688446            | 27319319 | 0 | 0    | 0      | A |
| 9 | BICF2G630831733         | 27328631 | 0 | 0    | 0      | A |
| 9 | BICF2P1104193           | 27345349 | 0 | 0    | 0      | A |
| 9 | BICF2G630831737         | 27373898 | 0 | 0    | 0      | C |
| 9 | BICF2G630831739         | 27384996 | A | 0.5  | 0.5    | G |
| 9 | BICF2G630831746         | 27402312 | C | 0.25 | 0.4286 | A |
| 9 | BICF2G630831765         | 27439060 | G | 0.75 | 0.5714 | A |
| 9 | BICF2G630831784         | 27455660 | 0 | 0    | 0      | G |
| 9 | BICF2P484513            | 27469213 | A | 0.25 | 0.3571 | G |
| 9 | BICF2P379734            | 27478164 | G | 0.25 | 0.3571 | A |
| 9 | TIGRP2P124429_rs9190346 | 27490260 | A | 0.75 | 0.3333 | C |
| 9 | BICF2P442136            | 27505131 | C | 0.75 | 0.3571 | A |
| 9 | BICF2S233344            | 27518829 | G | 1    | 1      | A |
| 9 | BICF2S23134376          | 27539209 | A | 0.5  | 0.7857 | G |
| 9 | BICF2S23153603          | 27543222 | G | NA   | 0.9    | A |
| 9 | BICF2P296384            | 27573262 | G | 0.75 | 0.3571 | A |
| 9 | BICF2P595725            | 27587125 | 0 | 0    | 0      | C |
| 9 | BICF2P594507            | 27589254 | 0 | 0    | 0      | A |
| 9 | BICF2P910809            | 27610112 | G | 0.75 | 0.6429 | A |
| 9 | BICF2G630831825         | 27615764 | G | 0.75 | 0.6429 | A |
| 9 | BICF2G630831844         | 27638152 | A | 0    | 0      | G |
| 9 | BICF2P211998            | 27646669 | G | 0    | 0      | A |
| 9 | BICF2G630831874         | 27656305 | 0 | 0    | 0      | G |
| 9 | BICF2G630831882         | 27658583 | 0 | 0    | 0      | G |
| 9 | BICF2S22929584          | 27689381 | G | 0    | 0      | A |

|   |                         |          |   |      |        |   |
|---|-------------------------|----------|---|------|--------|---|
| 9 | BICF2S23624985          | 27719863 | G | 1    | 1      | A |
| 9 | BICF2S23148301          | 27727467 | A | 0.5  | 0.7857 | G |
| 9 | BICF2G630831883         | 27753191 | 0 | 0    | 0      | A |
| 9 | BICF2G630831885         | 27795461 | A | 0    | 0      | G |
| 9 | BICF2P827739            | 27804818 | A | 1    | 1      | G |
| 9 | TIGRP2P124449_rs8851158 | 27810114 | A | 0    | 0      | G |
| 9 | BICF2P1295818           | 27822410 | A | 0.5  | 0.7857 | G |
| 9 | BICF2G630831901         | 27831229 | A | 0.5  | 0.1667 | G |
| 9 | BICF2G630831906         | 27845204 | G | 0.5  | 0.2143 | A |
| 9 | BICF2G630831913         | 27857103 | A | 0    | 0      | G |
| 9 | BICF2P994950            | 27864687 | A | 0.25 | 0.6429 | G |
| 9 | BICF2G630831941         | 27881079 | G | 1    | 0.3333 | A |
| 9 | BICF2G630831947         | 27893772 | A | 0.75 | 0.8571 | G |
| 9 | TIGRP2P124465_rs8597761 | 27914316 | A | 0    | 0      | C |
| 9 | BICF2G630831972         | 27932294 | A | 0    | 0      | G |
| 9 | BICF2G630831975         | 27933672 | G | 0    | 0      | A |
| 9 | BICF2P1429507           | 27945226 | A | 0    | 0      | G |
| 9 | BICF2G630832000         | 27961574 | G | 0.5  | 0.5    | C |
| 9 | BICF2G630832006         | 27983423 | A | 0.5  | 0.5    | G |
| 9 | BICF2G630832013         | 27992917 | C | 0.5  | 0.5    | A |
| 9 | BICF2S2442961           | 28018440 | C | 0.25 | 0.1429 | A |
| 9 | BICF2G630832039         | 28053901 | A | 0    | 0      | C |
| 9 | TIGRP2P124467_rs8560403 | 28066291 | 0 | 0    | 0      | G |
| 9 | BICF2G630832045         | 28087731 | G | 0    | 0.2857 | A |
| 9 | BICF2P980814            | 28097585 | A | 0.25 | 0.1429 | G |
| 9 | BICF2G630832062         | 28107912 | A | 0.75 | 0.8571 | C |
| 9 | TIGRP2P124471_rs8850785 | 28119059 | C | 0.75 | 0.8571 | A |
| 9 | BICF2P898428            | 28121824 | A | 0.75 | 0.8571 | G |
| 9 | TIGRP2P124473_rs9181214 | 28137126 | G | 0.5  | 0.5    | A |
| 9 | BICF2G630832091         | 28149593 | A | 0.25 | 0.3571 | G |
| 9 | BICF2G630832097         | 28172314 | C | 0.25 | 0.6429 | A |
| 9 | BICF2G630832098         | 28178094 | G | 0    | 0.2857 | A |
| 9 | BICF2G630832108         | 28192680 | G | 1    | 0.7143 | A |
| 9 | BICF2S2353168           | 28219010 | C | 0.25 | 0.3571 | A |
| 9 | BICF2P444992            | 28221397 | 0 | 0    | 0      | G |
| 9 | TIGRP2P124486_rs9015058 | 28262169 | A | 0    | 0      | C |
| 9 | BICF2P38700             | 28280411 | 0 | 0    | 0      | G |
| 9 | BICF2P633674            | 28297474 | G | 0.25 | 0.1429 | A |
| 9 | BICF2S22911646          | 28321622 | A | 0    | 0      | C |
| 9 | BICF2P1324571           | 28343272 | A | 0    | 0      | G |
| 9 | BICF2P425977            | 28351844 | A | 0.25 | 0.1429 | G |
| 9 | BICF2P504839            | 28360578 | A | 0.75 | 0.5714 | G |
| 9 | TIGRP2P124509_rs8705511 | 28376243 | A | 0.5  | 0.7857 | G |
| 9 | BICF2P1369895           | 28391933 | A | 0    | 0      | G |
| 9 | BICF2P1383800           | 28420736 | C | 0.5  | 0.5    | A |
| 9 | TIGRP2P124536_rs9109564 | 28434500 | G | 0.75 | 0.5714 | A |
| 9 | BICF2S23049628          | 28456141 | G | 0    | 0      | A |



|   |                         |          |   |      |        |   |
|---|-------------------------|----------|---|------|--------|---|
| 9 | BICF2P511133            | 28471653 | 0 | 0    | 0      | C |
| 9 | TIGRP2P124541_rs8751733 | 28481026 | 0 | 0    | 0      | G |
| 9 | BICF2P1013176           | 28491504 | A | 0.5  | 0.2143 | G |
| 9 | TIGRP2P124554_rs8620199 | 28500348 | G | 0.75 | 0.6429 | A |
| 9 | TIGRP2P124561_rs9140180 | 28519050 | A | 0    | 0      | C |
| 9 | BICF2P1378613           | 28520715 | A | 0.75 | 0.6429 | G |
| 9 | BICF2P849393            | 28543466 | A | 0.5  | 0.2143 | C |
| 9 | BICF2G630832137         | 28581567 | G | 0.5  | 0.5    | A |
| 9 | BICF2P512664            | 28606626 | 0 | 0    | 0      | A |
| 9 | BICF2S23327820          | 28630068 | A | 0    | 0.3571 | G |
| 9 | BICF2G630832150         | 28654951 | G | 0.25 | 0.1429 | A |
| 9 | BICF2S23537643          | 28664802 | G | 0.25 | 0.4286 | A |
| 9 | BICF2P827949            | 28671115 | C | 0.25 | 0.1429 | A |
| 9 | BICF2G630832189         | 28700337 | G | 0.75 | 0.5714 | A |
| 9 | BICF2G630832193         | 28707223 | A | 0.25 | 0.3571 | G |
| 9 | BICF2G630832196         | 28719420 | A | 0.5  | 0.5    | G |
| 9 | BICF2G630832213         | 28736700 | A | 0.25 | 0.1429 | G |
| 9 | BICF2G630832220         | 28749604 | G | 0.25 | 0.1429 | A |
| 9 | BICF2G630832221         | 28757105 | 0 | 0    | 0      | A |
| 9 | BICF2G630832223         | 28762604 | G | 0.25 | 0.1429 | A |
| 9 | BICF2P512239            | 28792045 | 0 | 0    | 0      | A |
| 9 | BICF2G630832234         | 28827137 | 0 | 0    | 0      | A |
| 9 | BICF2P483186            | 28839797 | A | 0.5  | 0.2143 | G |
| 9 | BICF2G630832245         | 28849502 | A | 0.5  | 0.2143 | G |
| 9 | BICF2P622903            | 28871567 | A | 0.5  | 0.2143 | G |
| 9 | BICF2G630832265         | 28876937 | A | 0    | 0      | G |
| 9 | BICF2G630832267         | 28877334 | G | 0.5  | 0.5    | A |
| 9 | BICF2G630832293         | 28893423 | C | 0.5  | 0.2143 | A |
| 9 | BICF2S23728785          | 28904905 | G | 0    | 0      | A |
| 9 | BICF2P1256607           | 28910609 | C | 0    | 0.2857 | A |
| 9 | BICF2P1364986           | 28912025 | A | 0    | 0.2857 | C |
| 9 | BICF2P715577            | 28923859 | A | 0.5  | 0.2143 | G |
| 9 | BICF2G630832353         | 28938596 | G | 0.5  | 0.5    | A |
| 9 | TIGRP2P124602_rs8873349 | 28954490 | 0 | 0    | 0      | G |
| 9 | BICF2G630832376         | 28972155 | A | 0.5  | 0.2143 | G |
| 9 | TIGRP2P124613_rs9113663 | 28986449 | A | 0    | 0.2857 | C |
| 9 | BICF2S2313426           | 28991695 | G | 0.75 | 0.8571 | A |
| 9 | BICF2G630832395         | 29012409 | A | 0    | 0      | G |
| 9 | BICF2G630832397         | 29031665 | G | 0.25 | 0.3571 | A |
| 9 | BICF2G630832401         | 29071229 | G | 0.25 | 0.3571 | A |
| 9 | BICF2G630832402         | 29075374 | A | 0.25 | 0.3571 | G |
| 9 | BICF2G630832408         | 29089053 | A | 0.25 | 0.3571 | G |
| 9 | BICF2P686487            | 29099309 | A | 0    | 0      | G |
| 9 | BICF2G630832410         | 29109787 | A | 0.25 | 0.3571 | G |
| 9 | BICF2S2417582           | 29120809 | 0 | 0    | 0      | G |
| 9 | BICF2S2417705           | 29133245 | 0 | 0    | 0      | A |
| 9 | BICF2P1253749           | 29181386 | 0 | 0    | 0      | A |

|   |                         |          |   |      |        |   |
|---|-------------------------|----------|---|------|--------|---|
| 9 | TIGRP2P124651_rs8559278 | 29213439 | 0 | 0    | 0      | G |
| 9 | BICF2P1376654           | 29214318 | 0 | 0    | 0      | G |
| 9 | BICF2P1007869           | 29223694 | G | 0    | 0.2857 | C |
| 9 | BICF2P880741            | 29237051 | 0 | 0    | 0      | C |
| 9 | BICF2P175994            | 29246589 | 0 | 0    | 0      | G |
| 9 | BICF2P903715            | 29260874 | 0 | 0    | 0      | C |
| 9 | BICF2P1044560           | 29272628 | G | 0    | 0      | A |
| 9 | BICF2S23733240          | 29280041 | 0 | 0    | 0      | G |
| 9 | BICF2G630832420         | 29292538 | A | 0.25 | 0.6429 | G |
| 9 | BICF2G630832428         | 29312147 | A | 0.25 | 0.3571 | G |
| 9 | BICF2P247080            | 29317871 | A | 0.25 | 0.3571 | G |
| 9 | BICF2S23724238          | 29344477 | A | 0    | 0      | G |
| 9 | BICF2P621525            | 29359128 | 0 | 0    | 0      | G |
| 9 | BICF2P128506            | 29363866 | 0 | 0    | 0      | A |
| 9 | BICF2P703646            | 29376507 | A | 0    | 0      | G |
| 9 | BICF2P1190838           | 29383948 | A | 0    | 0      | C |
| 9 | BICF2P153894            | 29400686 | 0 | 0    | 0      | C |
| 9 | BICF2P1112605           | 29419223 | A | 0.25 | 0.3571 | G |
| 9 | BICF2S23448848          | 29433939 | A | 0.25 | 0.3571 | G |
| 9 | BICF2P133831            | 29457806 | A | 0.5  | 0.2143 | G |
| 9 | BICF2P1242434           | 29463998 | C | 1    | 0.5833 | A |
| 9 | TIGRP2P124703_rs8930238 | 29477612 | G | 0    | 0      | A |
| 9 | TIGRP2P124707_rs9054356 | 29490602 | A | 0    | 0      | G |
| 9 | BICF2S23221582          | 29492561 | A | 0    | 0      | G |
| 9 | BICF2P608608            | 29505562 | A | 0.25 | 0.3571 | G |
| 9 | BICF2S23238306          | 29515328 | C | 0.25 | 0.3571 | A |
| 9 | TIGRP2P124715_rs9175146 | 29523270 | C | 0.25 | 0.3571 | A |
| 9 | BICF2S23127944          | 29533680 | C | 0    | 0      | A |
| 9 | TIGRP2P124721_rs8965077 | 29544285 | A | 0    | 0      | G |
| 9 | BICF2S23039639          | 29570819 | A | 0    | 0      | G |
| 9 | TIGRP2P124731_rs9138044 | 29586941 | A | 0    | 0      | G |
| 9 | BICF2S22931242          | 29609356 | A | 0    | 0      | G |
| 9 | BICF2S22931930          | 29613105 | G | 0.5  | 0.2143 | A |
| 9 | TIGRP2P124747_rs8966269 | 29625229 | 0 | 0    | 0      | G |
| 9 | BICF2P56923             | 29643722 | 0 | 0    | 0      | G |
| 9 | BICF2P1207279           | 29648722 | A | 0.25 | 0.3333 | G |
| 9 | BICF2S23445364          | 29679793 | G | 0    | 0      | A |
| 9 | BICF2P564610            | 29698678 | G | 0.5  | 0.7857 | A |
| 9 | BICF2P823834            | 29705221 | G | 0.25 | 0.3571 | A |
| 9 | TIGRP2P124782_rs9114659 | 29748883 | G | 0.25 | 0.4286 | A |
| 9 | BICF2S23617078          | 29754900 | G | 0    | 0      | A |
| 9 | TIGRP2P124788_rs8495442 | 29764297 | C | 0.5  | 0.5    | G |
| 9 | BICF2P1460564           | 29765785 | C | 0.5  | 0.5    | A |
| 9 | BICF2P1283262           | 29781458 | G | 0    | 0      | A |
| 9 | BICF2P517678            | 29792987 | A | 0.25 | 0.6667 | G |
| 9 | BICF2P934377            | 29800710 | A | 0.25 | 0.1429 | C |
| 9 | BICF2P1251983           | 29814121 | A | 0.25 | 0.1429 | G |

|   |                         |          |   |      |         |   |
|---|-------------------------|----------|---|------|---------|---|
| 9 | BICF2P1097952           | 29823351 | G | 0.25 | 0.1429  | A |
| 9 | BICF2P465288            | 29835643 | G | 0.25 | 0.08333 | A |
| 9 | BICF2P1328332           | 29851726 | A | 0.25 | 0.1429  | G |
| 9 | BICF2P1057164           | 29862030 | C | 0    | 0       | A |
| 9 | BICF2S2301938           | 29862746 | C | 0    | 0       | A |
| 9 | BICF2P90380             | 29870486 | A | 0    | 0       | G |
| 9 | BICF2P1319502           | 29878004 | G | 0.75 | 0.5714  | C |
| 9 | BICF2P265252            | 29887773 | C | 0.25 | 0.4286  | A |
| 9 | BICF2P947825            | 29904024 | A | 0.75 | 0.5714  | G |
| 9 | BICF2S2366542           | 29916599 | G | 0    | 0       | A |
| 9 | BICF2S23439099          | 29925533 | G | 0.5  | 0.2143  | A |
| 9 | BICF2P404465            | 29952052 | 0 | 0    | 0       | A |
| 9 | BICF2S23440631          | 29968070 | C | 0.5  | 0.7857  | A |
| 9 | BICF2P278275            | 29976729 | 0 | 0    | 0       | A |
| 9 | BICF2P15124             | 29985725 | A | 0.25 | 0.3571  | G |
| 9 | BICF2P865293            | 30002348 | A | 1    | 0.7143  | C |
| 9 | BICF2P335760            | 30018537 | A | 0.75 | 0.8571  | G |
| 9 | BICF2P408899            | 30037376 | A | 0    | 0       | G |
| 9 | BICF2P408901            | 30038029 | G | 0    | 0       | A |
| 9 | BICF2S23434833          | 30050606 | A | 0.5  | 0.5     | G |
| 9 | BICF2P78288             | 30066211 | A | 0.5  | 0.7857  | G |
| 9 | BICF2P1014337           | 30073435 | G | 0.5  | 0.2143  | A |
| 9 | BICF2P249497            | 30087890 | G | 0    | 0       | A |
| 9 | BICF2P271346            | 30093711 | A | 0    | 0       | G |
| 9 | TIGRP2P124858_rs9005595 | 30099170 | A | 0.25 | 0.1429  | G |
| 9 | BICF2P835557            | 30115225 | G | 0.5  | 0.2143  | A |
| 9 | BICF2P664463            | 30118766 | A | 0.5  | 0.7857  | G |
| 9 | BICF2P11380             | 30140216 | A | 0    | 0       | G |
| 9 | BICF2P1290874           | 30145702 | G | 0    | 0       | A |
| 9 | TIGRP2P124881_rs9041767 | 30153060 | G | 0.75 | 0.8571  | A |
| 9 | BICF2P1047684           | 30167303 | A | 0    | 0       | G |
| 9 | BICF2P780489            | 30179511 | G | 0.75 | 0.8571  | A |
| 9 | BICF2P1266509           | 30188294 | A | 0.5  | 0.2143  | G |
| 9 | BICF2P136137            | 30203307 | A | 0    | 0       | G |
| 9 | BICF2S23454437          | 30213435 | G | 0    | 0       | A |
| 9 | TIGRP2P124898_rs8896240 | 30224874 | 0 | 0    | 0       | C |
| 9 | BICF2P460526            | 30235284 | A | 0.25 | 0.6429  | G |
| 9 | BICF2S2443137           | 30252001 | G | 0    | 0       | A |
| 9 | BICF2P1385209           | 30258635 | C | 0    | 0       | A |
| 9 | BICF2P7893              | 30277129 | T | 0    | 0       | A |
| 9 | BICF2S23220057          | 30296922 | A | 0    | 0       | C |
| 9 | BICF2S23734161          | 30330162 | G | 0.75 | 0.8571  | A |
| 9 | TIGRP2P124916_rs8517770 | 30345642 | G | 0.75 | 0.8571  | A |
| 9 | BICF2P612726            | 30352097 | A | 0.75 | 0.8571  | C |
| 9 | BICF2P411176            | 30368078 | G | 0.75 | 0.8571  | A |
| 9 | BICF2P31424             | 30371848 | A | 0.75 | 0.8571  | G |
| 9 | BICF2P461486            | 30405752 | G | 0.25 | 0.1429  | A |

|   |                         |          |   |      |        |   |
|---|-------------------------|----------|---|------|--------|---|
| 9 | BICF2P1287982           | 30417877 | A | 0.25 | 0.1429 | C |
| 9 | BICF2P1456913           | 30436447 | C | 0.25 | 0.1429 | A |
| 9 | BICF2S23130870          | 30441444 | A | 0.5  | 0.2143 | G |
| 9 | BICF2P965562            | 30452764 | A | 0.75 | 0.3571 | G |
| 9 | BICF2P930986            | 30468313 | G | 0.25 | 0.6429 | A |
| 9 | TIGRP2P124950_rs8723618 | 30475652 | A | 0.25 | 0.6429 | C |
| 9 | BICF2P921874            | 30487096 | A | 0.5  | 0.7857 | G |
| 9 | BICF2P1063363           | 30499861 | A | 0.5  | 0.2143 | G |
| 9 | BICF2P646766            | 30504831 | G | 0    | 0      | A |
| 9 | BICF2P772317            | 30513015 | G | 0.5  | 0.8333 | A |
| 9 | BICF2P994012            | 30522669 | G | 0.5  | 0.7857 | A |
| 9 | BICF2P346418            | 30535071 | A | 0.5  | 0.7857 | G |
| 9 | BICF2S23646726          | 30546696 | C | 0.25 | 0.1429 | A |
| 9 | BICF2P595751            | 30566681 | G | 0    | 0      | A |
| 9 | BICF2P859170            | 30568116 | 0 | 0    | 0      | C |
| 9 | BICF2P845006            | 30591080 | G | 0    | 0      | A |
| 9 | BICF2P895077            | 30610760 | A | 0    | 0      | G |
| 9 | BICF2P904943            | 30611557 | A | 1    | 1      | G |
| 9 | BICF2S23454318          | 30631271 | A | 0.25 | 0.6429 | C |
| 9 | BICF2P1425742           | 30647370 | A | 0.25 | 0.6429 | C |
| 9 | BICF2P524622            | 30651594 | G | 0    | 0      | A |
| 9 | BICF2S22926273          | 30663559 | A | 0.5  | 0.2143 | G |
| 9 | BICF2S23446804          | 30681708 | G | 0    | 0      | A |
| 9 | BICF2P570450            | 30697279 | G | 1    | 1      | A |
| 9 | BICF2P225354            | 30701513 | G | 0.25 | 0.1429 | A |
| 9 | BICF2S23913393          | 30706965 | G | 0.75 | 0.3571 | A |
| 9 | BICF2S23660012          | 30720191 | A | 0    | 0      | G |
| 9 | BICF2P44044             | 30745103 | G | 0.25 | 0.1429 | A |
| 9 | BICF2P1225976           | 30754535 | A | 0    | 0      | G |
| 9 | BICF2P1095566           | 30774122 | C | 0    | 0      | A |
| 9 | BICF2P405846            | 30789411 | G | 0    | 0      | A |
| 9 | BICF2S2325490           | 30795413 | C | 0    | 0      | A |
| 9 | BICF2S23357108          | 30824740 | A | 0.25 | 0.6429 | G |
| 9 | BICF2P369344            | 30852878 | G | 0.25 | 0.6429 | A |
| 9 | BICF2P369345            | 30853111 | T | 0    | 0      | A |
| 9 | TIGRP2P125005_rs8797941 | 30857596 | A | 0.25 | 0.6429 | G |
| 9 | BICF2P791708            | 30870027 | A | 0    | 0      | G |
| 9 | BICF2P316925            | 30883441 | 0 | 0    | 0      | A |
| 9 | BICF2P1398603           | 30890432 | G | 0.75 | 0.3571 | A |
| 9 | BICF2P1398601           | 30890606 | G | 0.75 | 0.3571 | A |
| 9 | TIGRP2P125027_rs8519153 | 30903733 | A | 0.5  | 0.2143 | C |
| 9 | BICF2S2365146           | 30918083 | G | 0.25 | 0.1429 | A |
| 9 | BICF2P1008064           | 30926816 | T | 0    | 0      | A |
| 9 | BICF2S23645786          | 30956888 | G | 0    | 0      | A |
| 9 | BICF2S23648273          | 30965162 | G | 0    | 0      | A |
| 9 | BICF2P1420892           | 30970175 | G | 0    | 0.6429 | A |
| 9 | TIGRP2P125037_rs8777456 | 30981287 | A | 0.25 | 0.6429 | G |

|   |                         |          |   |      |        |   |
|---|-------------------------|----------|---|------|--------|---|
| 9 | BICF2P1456147           | 30993821 | 0 | 0    | 0      | A |
| 9 | BICF2P1036408           | 31006006 | A | 0.25 | 0.6429 | G |
| 9 | TIGRP2P125055_rs8787315 | 31016192 | A | 0.75 | 0.3571 | G |
| 9 | BICF2S2337872           | 31027374 | G | 0.75 | 0.3571 | A |
| 9 | BICF2P864056            | 31046456 | G | 0.25 | 0.6429 | A |
| 9 | BICF2S23029406          | 31061297 | C | 0    | 0      | A |
| 9 | BICF2P579558            | 31067109 | G | 0.25 | 0.6429 | A |
| 9 | BICF2P222398            | 31074375 | A | 0.75 | 0.3571 | G |
| 9 | BICF2P439781            | 31091251 | A | 0.25 | 0.6429 | G |
| 9 | BICF2P851059            | 31094197 | G | 0.25 | 0.6429 | A |
| 9 | BICF2S23258442          | 31119264 | A | 0.25 | 0.6429 | G |
| 9 | BICF2P13550             | 31137779 | G | 0.25 | 0.6429 | A |
| 9 | BICF2S23321299          | 31149117 | A | 0    | 0      | G |
| 9 | TIGRP2P125076_rs9006818 | 31162799 | A | 0.75 | 0.3571 | G |
| 9 | BICF2P575468            | 31162999 | C | 0.25 | 0.6429 | A |
| 9 | TIGRP2P125086_rs9169757 | 31168032 | 0 | 0    | 0      | A |
| 9 | BICF2P1297013           | 31180407 | G | 0.75 | 0.3571 | A |
| 9 | BICF2P236403            | 31190332 | A | 0    | 0      | G |
| 9 | BICF2G630832458         | 31195063 | A | 0.5  | 0.2143 | G |
| 9 | BICF2G630832463         | 31199614 | A | 0.75 | 0.3571 | G |
| 9 | BICF2S23311801          | 31217337 | C | 0.25 | 0.6429 | A |
| 9 | BICF2G630832496         | 31226717 | G | 0.75 | 0.3571 | A |
| 9 | BICF2G630832509         | 31236960 | A | 0    | 0      | G |
| 9 | TIGRP2P125117_rs8576756 | 31251143 | A | 0    | 0      | G |
| 9 | BICF2P1351569           | 31251493 | C | 0    | 0      | G |
| 9 | BICF2G630832553         | 31259757 | G | 0    | 0      | A |
| 9 | BICF2G630832571         | 31270911 | A | 0    | 0      | C |
| 9 | BICF2G630832598         | 31285649 | A | 0    | 0      | G |
| 9 | BICF2P1467481           | 31291347 | G | 0    | 0      | A |
| 9 | BICF2P1260647           | 31297775 | G | 0.75 | 0.8571 | A |
| 9 | BICF2G630832634         | 31305477 | A | 0.25 | 0.1429 | C |
| 9 | BICF2P904013            | 31316264 | A | 0.25 | 0.1429 | G |
| 9 | BICF2S23445230          | 31335044 | A | 0.75 | 0.8571 | G |
| 9 | BICF2G630832689         | 31338368 | 0 | 0    | 0      | A |
| 9 | BICF2P1468397           | 31360047 | A | 0.25 | 0.6429 | G |
| 9 | BICF2P1188773           | 31367534 | 0 | 0    | 0      | A |
| 9 | BICF2G630832709         | 31375287 | A | 0    | 0      | G |
| 9 | BICF2S23037275          | 31385446 | A | 0.5  | 0.7857 | G |
| 9 | BICF2G630832753         | 31395897 | A | 0.5  | 0.7857 | C |
| 9 | BICF2G630832768         | 31407604 | A | 0.25 | 0.1429 | G |
| 9 | BICF2S23212757          | 31422467 | A | 0.5  | 0.2143 | G |
| 9 | BICF2G630832826         | 31435434 | G | 0    | 0      | A |
| 9 | BICF2P218365            | 31442845 | A | 0    | 0      | G |
| 9 | BICF2G630832847         | 31453097 | A | 0    | 0      | G |
| 9 | BICF2G630832886         | 31476272 | G | 0.5  | 0.2143 | A |
| 9 | BICF2P445752            | 31515824 | A | 0.5  | 0.2143 | T |
| 9 | TIGRP2P125193_rs8961396 | 31522542 | C | 0.5  | 0.2143 | A |

|   |                         |          |   |      |        |   |
|---|-------------------------|----------|---|------|--------|---|
| 9 | BICF2G630832914         | 31542090 | A | 0.5  | 0.7857 | G |
| 9 | BICF2G630832924         | 31549819 | G | 0.5  | 0.7857 | A |
| 9 | BICF2G630832982         | 31571947 | A | 0    | 0      | G |
| 9 | BICF2G630833002         | 31588332 | A | 0    | 0      | G |
| 9 | BICF2G630833006         | 31594176 | A | 0    | 0      | G |
| 9 | BICF2P439373            | 31607014 | A | 0    | 0      | G |
| 9 | BICF2S23657764          | 31610370 | A | 0    | 0      | G |
| 9 | BICF2G630833086         | 31625422 | 0 | 0    | 0      | C |
| 9 | BICF2S231667            | 31641537 | G | 0.5  | 0.2143 | A |
| 9 | BICF2G630833089         | 31650441 | 0 | 0    | 0      | A |
| 9 | BICF2G630833111         | 31668697 | G | 0    | 0      | A |
| 9 | BICF2P1140871           | 31676163 | 0 | 0    | 0      | A |
| 9 | BICF2G630833137         | 31688563 | G | 0    | 0      | A |
| 9 | TIGRP2P125218_rs9191977 | 31700038 | G | 0    | 0      | A |
| 9 | BICF2G630833150         | 31708751 | A | 0    | 0      | C |
| 9 | BICF2G630833193         | 31727999 | G | 0.5  | 0.2143 | C |
| 9 | BICF2G630833199         | 31731146 | G | 0    | 0      | A |
| 9 | BICF2S2327014           | 31741984 | G | 0.5  | 0.2143 | A |
| 9 | BICF2P734473            | 31757174 | 0 | 0    | 0      | A |
| 9 | BICF2P343539            | 31764375 | A | 0    | 0      | G |
| 9 | BICF2P572850            | 31778462 | A | 0    | 0      | G |
| 9 | BICF2P849794            | 31793988 | A | 0    | 0      | G |
| 9 | BICF2S23051048          | 31806338 | T | 0.5  | 0.2143 | A |
| 9 | BICF2P273143            | 31809310 | G | 0.5  | 0.2143 | A |
| 9 | TIGRP2P125274_rs8923497 | 31826533 | C | 0    | 0      | A |
| 9 | BICF2P592997            | 31837101 | C | 0    | 0      | A |
| 9 | BICF2P297901            | 31844320 | C | 0    | 0      | A |
| 9 | BICF2P165135            | 31858639 | A | 0    | 0      | G |
| 9 | BICF2P608643            | 31872270 | A | 0.5  | 0.2143 | G |
| 9 | BICF2P1167028           | 31894800 | G | 0.25 | 0.1429 | A |
| 9 | TIGRP2P125320_rs8795008 | 31911559 | A | 0.5  | 0.2143 | G |
| 9 | BICF2P923923            | 31912890 | G | 0.25 | 0.1429 | A |
| 9 | BICF2P1112691           | 31917571 | A | 0.5  | 0.2143 | G |
| 9 | BICF2P1112693           | 31917964 | A | 0.5  | 0.2143 | C |
| 9 | BICF2P782452            | 31926056 | C | 0.5  | 0.2143 | A |
| 9 | TIGRP2P125338_rs9070968 | 31938072 | A | 0.25 | 0.6429 | G |
| 9 | BICF2G630833211         | 31948751 | A | 0.5  | 0.2143 | G |
| 9 | BICF2P648889            | 31974913 | A | 0    | 0      | G |
| 9 | BICF2G630833244         | 31985674 | A | 0.25 | 0.6429 | G |
| 9 | BICF2G630833261         | 31996195 | 0 | 0    | 0      | G |
| 9 | BICF2G630833273         | 32016223 | A | 0    | 0      | G |
| 9 | BICF2G630833289         | 32039127 | A | 1    | 1      | G |
| 9 | BICF2P126723            | 32053513 | A | 0.25 | 0.6429 | G |
| 9 | BICF2P1156337           | 32073335 | G | 0.5  | 0.2143 | A |
| 9 | BICF2G630833300         | 32074586 | A | 0.75 | 0.8571 | G |
| 9 | TIGRP2P125376_rs8924630 | 32118564 | G | 0.5  | 0.2143 | C |
| 9 | BICF2P741492            | 32122613 | A | 0.25 | 0.1429 | C |

|   |                         |          |   |      |        |   |
|---|-------------------------|----------|---|------|--------|---|
| 9 | BICF2G630833353         | 32174379 | A | 0    | 0      | G |
| 9 | BICF2P1006817           | 32185105 | 0 | 0    | 0      | G |
| 9 | BICF2G630833361         | 32194464 | A | 0.25 | 0.6429 | C |
| 9 | BICF2G630833374         | 32200160 | G | 0    | 0      | A |
| 9 | BICF2P198852            | 32216181 | G | 0.75 | 0.8571 | A |
| 9 | BICF2G630833380         | 32223968 | A | 0.75 | 0.8571 | G |
| 9 | BICF2G630833403         | 32235900 | G | 1    | 1      | A |
| 9 | BICF2G630833414         | 32246346 | A | 0    | 0      | G |
| 9 | BICF2G630833437         | 32264461 | G | 0    | 0.1429 | A |
| 9 | BICF2G630833451         | 32275301 | A | 0    | 0      | G |
| 9 | BICF2P1115752           | 32276964 | A | 0.75 | 0.8571 | G |
| 9 | BICF2S23526723          | 32287797 | A | 0.25 | 0.6429 | G |
| 9 | BICF2G630833477         | 32296152 | A | 0    | 0      | G |
| 9 | BICF2G630833496         | 32304597 | 0 | 0    | 0      | G |
| 9 | BICF2G630833504         | 32317715 | 0 | 0    | 0      | G |
| 9 | BICF2G630833516         | 32329065 | G | 0    | 0      | A |
| 9 | BICF2P403525            | 32345254 | C | 0.25 | 0.6667 | A |
| 9 | BICF2G630833530         | 32349999 | A | 0    | 0      | C |
| 9 | BICF2S23124692          | 32366061 | A | 0.25 | 0.6429 | G |
| 9 | BICF2S23616631          | 32372838 | A | 0.25 | 0.6429 | G |
| 9 | BICF2P86688             | 32394332 | A | 0.5  | 0.1667 | G |
| 9 | BICF2P400707            | 32404436 | A | 0    | 0      | G |
| 9 | BICF2P1226555           | 32417956 | G | 0.75 | 0.8571 | A |
| 9 | BICF2P793963            | 32431122 | A | 0.5  | 0.2143 | G |
| 9 | BICF2S23730957          | 32442291 | A | 0.75 | 0.3571 | C |
| 9 | BICF2P771167            | 32445877 | A | 0.75 | 0.3    | G |
| 9 | BICF2G630833538         | 32453720 | A | 0    | 0      | C |
| 9 | BICF2P303456            | 32469420 | G | 1    | 1      | A |
| 9 | BICF2G630833560         | 32471341 | C | 0.25 | 0.6429 | A |
| 9 | BICF2S23237727          | 32473750 | C | 0.25 | 0.6429 | A |
| 9 | BICF2G630833581         | 32478681 | C | 0.25 | 0.6429 | A |
| 9 | BICF2G630833598         | 32487935 | G | 0    | 0      | A |
| 9 | TIGRP2P125505_rs8755867 | 32499594 | 0 | 0    | 0      | G |
| 9 | BICF2P141320            | 32516668 | G | 0    | 0      | A |
| 9 | TIGRP2P125522_rs9216816 | 32523488 | A | 0.75 | 0.8571 | G |
| 9 | BICF2P633807            | 32543933 | G | 0.25 | 0.6429 | A |
| 9 | TIGRP2P125526_rs9186537 | 32546434 | A | 0.25 | 0.6429 | G |
| 9 | BICF2G630833617         | 32562381 | A | 0.25 | 0.6429 | G |
| 9 | BICF2G630833623         | 32570304 | A | 0    | 0      | G |
| 9 | BICF2G630833633         | 32588392 | A | 0    | 0      | G |
| 9 | BICF2G630833642         | 32597679 | G | 0.25 | 0.1429 | C |
| 9 | BICF2S23737788          | 32602678 | G | 0    | 0      | A |
| 9 | BICF2S23441620          | 32616389 | A | 0    | 0      | C |
| 9 | BICF2G630833644         | 32635299 | A | 0    | 0      | G |
| 9 | BICF2S2442024           | 32666562 | G | 0    | 0      | C |
| 9 | BICF2S23416345          | 32686741 | G | 0    | 0      | A |
| 9 | BICF2P961721            | 32697596 | 0 | 0    | 0      | G |

|   |                         |          |   |      |         |   |
|---|-------------------------|----------|---|------|---------|---|
| 9 | BICF2S23528313          | 32706394 | T | 0    | 0       | A |
| 9 | BICF2S24113908          | 32720567 | 0 | 0    | 0       | C |
| 9 | BICF2S23652401          | 32730723 | 0 | 0    | 0       | A |
| 9 | BICF2P1137291           | 32754285 | A | 0.5  | 0.1667  | C |
| 9 | BICF2S23743595          | 32787377 | G | 0    | 0       | A |
| 9 | BICF2G630833654         | 32801692 | A | 0    | 0       | G |
| 9 | TIGRP2P125543_rs8576216 | 32823801 | A | 0    | 0       | G |
| 9 | BICF2G630833680         | 32824187 | A | 0    | 0       | G |
| 9 | BICF2P1426852           | 32838630 | 0 | 0    | 0       | A |
| 9 | BICF2G630833694         | 32850477 | A | 0    | 0       | G |
| 9 | BICF2P1161648           | 32870416 | G | 0.25 | 0.6429  | A |
| 9 | BICF2P365782            | 32880304 | A | 0.75 | 0.8571  | G |
| 9 | BICF2P529809            | 32890933 | A | 1    | 0.8571  | G |
| 9 | BICF2P731888            | 32909418 | G | 0.75 | 0.8571  | A |
| 9 | BICF2G630833717         | 32923794 | A | 0    | 0       | G |
| 9 | BICF2S23412397          | 32928747 | A | 0    | 0       | G |
| 9 | BICF2P12813             | 32942031 | 0 | 0    | 0       | A |
| 9 | BICF2P1171323           | 32969524 | 0 | 0    | 0       | C |
| 9 | TIGRP2P125580_rs8598161 | 32976914 | G | 0    | 0       | A |
| 9 | TIGRP2P125582_rs8650416 | 32992759 | A | 0    | 0       | G |
| 9 | BICF2S23657953          | 32994533 | A | 0    | 0       | G |
| 9 | BICF2P1379015           | 33016084 | A | 0    | 0       | G |
| 9 | TIGRP2P125591_rs9046953 | 33025118 | A | 0    | 0       | C |
| 9 | BICF2P203331            | 33033761 | A | 0    | 0       | T |
| 9 | BICF2P1039916           | 33041000 | A | 0    | 0       | G |
| 9 | BICF2P326994            | 33053882 | A | 0    | 0       | G |
| 9 | BICF2P532327            | 33065270 | A | 0.25 | 0.6429  | C |
| 9 | BICF2P174301            | 33075236 | G | 0.25 | 0.6429  | A |
| 9 | TIGRP2P125634_rs8791892 | 33096133 | G | 0    | 0       | A |
| 9 | BICF2G630833774         | 33102532 | G | 0.25 | 0.6429  | A |
| 9 | BICF2P889641            | 33111844 | A | 0    | 0       | G |
| 9 | TIGRP2P125642_rs9241155 | 33121838 | A | 0    | 0       | G |
| 9 | BICF2G630833841         | 33136942 | A | 0    | 0       | G |
| 9 | BICF2G630833888         | 33152097 | A | 0    | 0       | G |
| 9 | BICF2G630833895         | 33154676 | A | 0    | 0       | G |
| 9 | BICF2S23225223          | 33166387 | 0 | 0    | 0       | A |
| 9 | TIGRP2P125655_rs9075769 | 33179354 | A | 0    | 0       | G |
| 9 | BICF2P243419            | 33196426 | 0 | 0    | 0       | A |
| 9 | BICF2P848241            | 33206923 | 0 | 0    | 0       | A |
| 9 | BICF2G630833906         | 33221088 | G | 0.25 | 0.1429  | A |
| 9 | BICF2G630833912         | 33226373 | A | 0.25 | 0.1429  | G |
| 9 | BICF2G630833921         | 33241848 | G | 0.25 | 0.1429  | A |
| 9 | BICF2G630833922         | 33247670 | A | 0.25 | 0.1429  | G |
| 9 | BICF2G630833937         | 33258313 | G | 0.25 | 0.08333 | A |
| 9 | BICF2G630833948         | 33279166 | A | 0.25 | 0.1429  | G |
| 9 | BICF2G630833968         | 33305226 | A | 0.5  | 0.2143  | G |
| 9 | BICF2S2312436           | 33327518 | A | 0    | 0       | G |



|   |                         |          |   |      |        |   |
|---|-------------------------|----------|---|------|--------|---|
| 9 | BICF2S22914451          | 33341090 | A | 0.5  | 0.7857 | G |
| 9 | BICF2P766568            | 33352698 | A | 0.5  | 0.7857 | G |
| 9 | BICF2G630833993         | 33363319 | G | 0.5  | 0.7857 | A |
| 9 | BICF2G630834000         | 33366933 | A | 0    | 0      | C |
| 9 | BICF2G630834017         | 33375409 | A | 0.5  | 0.7857 | G |
| 9 | BICF2P441965            | 33389661 | G | 0.5  | 0.2143 | A |
| 9 | BICF2G630834044         | 33407485 | G | 0.25 | 0.1429 | A |
| 9 | BICF2G630834051         | 33408680 | A | 0.25 | 0.1429 | G |
| 9 | BICF2G630834074         | 33426328 | A | 0.25 | 0.1429 | G |
| 9 | BICF2G630834084         | 33435717 | G | 0    | 0      | A |
| 9 | BICF2G630834099         | 33442140 | 0 | 0    | 0      | A |
| 9 | BICF2P352509            | 33455273 | G | 0.25 | 0.1429 | A |
| 9 | BICF2G630834126         | 33476545 | A | 0.5  | 0.2143 | G |
| 9 | BICF2G630834148         | 33497140 | A | 0.25 | 0.1429 | G |
| 9 | BICF2G630834150         | 33500099 | A | 0.25 | 0.1429 | G |
| 9 | BICF2G630834171         | 33512035 | G | 0.25 | 0.1429 | A |
| 9 | BICF2P67517             | 33544469 | 0 | 0    | 0      | A |
| 9 | BICF2P1053335           | 33547182 | G | 0.5  | 0.7857 | A |
| 9 | BICF2G630834181         | 33552225 | A | 0.5  | 0.7857 | C |
| 9 | BICF2P895444            | 33565590 | 0 | 0    | 0      | C |
| 9 | TIGRP2P125686_rs8962528 | 33585130 | A | 0    | 0      | C |
| 9 | BICF2S23126894          | 33603473 | A | 1    | 1      | G |
| 9 | BICF2S2349702           | 33622986 | A | 0    | 0      | G |
| 9 | BICF2G630834196         | 33632784 | G | 0.25 | 0.1429 | A |
| 9 | BICF2G630834200         | 33638821 | G | 0.25 | 0.1429 | A |
| 9 | BICF2G630834202         | 33639293 | C | 0.25 | 0.1429 | G |
| 9 | BICF2G630834214         | 33655712 | A | 0.75 | 0.3571 | C |
| 9 | BICF2G630834221         | 33667371 | A | 0.75 | 0.3571 | G |
| 9 | BICF2S22942358          | 33672109 | A | 0.75 | 0.3571 | G |
| 9 | BICF2P1358309           | 33716392 | 0 | 0    | 0      | G |
| 9 | BICF2G630834233         | 33723172 | G | 1    | 1      | A |
| 9 | BICF2P269899            | 33729770 | A | 0    | 0      | G |
| 9 | BICF2P855951            | 33735571 | G | 0.5  | 0.2143 | A |
| 9 | BICF2P747243            | 33743749 | A | 0.25 | 0.6429 | G |
| 9 | BICF2G630834247         | 33745329 | A | 0    | 0      | G |
| 9 | BICF2P437486            | 33745408 | A | 0    | 0      | G |
| 9 | BICF2S23433019          | 33754761 | A | 0    | 0      | G |
| 9 | BICF2G630834251         | 33767096 | A | 0.5  | 0.2143 | G |
| 9 | BICF2P746247            | 33784632 | G | 0.75 | 0.8571 | A |
| 9 | BICF2P356973            | 33788824 | G | 0.75 | 0.8571 | A |
| 9 | BICF2P275732            | 33803977 | A | 0    | 0      | G |
| 9 | TIGRP2P125736_rs8803563 | 33814731 | A | 0    | 0      | G |
| 9 | BICF2P616959            | 33827329 | 0 | 0    | 0      | A |
| 9 | BICF2G630834263         | 33853833 | A | 0    | 0      | G |
| 9 | BICF2P190873            | 33864619 | A | 0.75 | 0.3571 | G |
| 9 | BICF2P1260486           | 33873555 | G | 0.75 | 0.3571 | A |
| 9 | BICF2P341690            | 33877060 | A | 0.75 | 0.3571 | G |

|   |                         |          |   |      |        |   |
|---|-------------------------|----------|---|------|--------|---|
| 9 | BICF2G630834275         | 33879331 | G | 1    | 1      | A |
| 9 | BICF2G630834299         | 33895347 | G | 1    | 1      | A |
| 9 | BICF2G630834316         | 33908322 | A | 0    | 0      | G |
| 9 | BICF2G630834343         | 33918647 | A | 0    | 0      | G |
| 9 | BICF2P678209            | 33927582 | A | 0.5  | 0.2143 | G |
| 9 | BICF2G630834345         | 33937906 | C | 0.5  | 0.1667 | A |
| 9 | TIGRP2P125762_rs8635470 | 33951974 | G | 1    | 1      | A |
| 9 | BICF2P53257             | 33963114 | A | 0.5  | 1      | G |
| 9 | BICF2G630834364         | 33972401 | O | 0    | 0      | G |
| 9 | BICF2P191160            | 33983680 | C | 0.5  | 0.2143 | A |
| 9 | BICF2P76406             | 34004884 | G | 0.5  | 0.2143 | A |
| 9 | BICF2P76412             | 34006150 | G | 0    | 0      | A |
| 9 | TIGRP2P125783_rs9027243 | 34017229 | T | 0    | 0      | A |
| 9 | BICF2P20832             | 34039241 | C | 1    | 1      | A |
| 9 | TIGRP2P125852_rs9045688 | 34066967 | G | 0.75 | 0.3571 | A |
| 9 | BICF2P760310            | 34133373 | A | 0    | 0      | C |
| 9 | BICF2S23011878          | 34177196 | A | 0.25 | 0.1429 | G |
| 9 | BICF2G630834372         | 34193946 | A | 0.25 | 0.6429 | G |
| 9 | BICF2G630834393         | 34207784 | C | 0.75 | 0.3571 | G |
| 9 | BICF2G630834422         | 34235253 | A | 0.25 | 0.6429 | G |
| 9 | BICF2S2319354           | 34241589 | G | 0.25 | 0.6429 | A |
| 9 | TIGRP2P125999_rs9085962 | 34250888 | A | 0.25 | 0.6429 | T |
| 9 | BICF2G630834450         | 34263517 | G | 0    | 0      | A |
| 9 | TIGRP2P126003_rs8802234 | 34274903 | A | 0.75 | 0.3571 | C |
| 9 | BICF2G630834483         | 34282898 | A | 0    | 0      | G |
| 9 | TIGRP2P126010_rs8582718 | 34302324 | A | 0.25 | 0.1429 | G |
| 9 | BICF2P1067183           | 34312062 | A | 0.75 | 0.8571 | G |
| 9 | TIGRP2P126044_rs9006420 | 34318130 | G | 0    | 0      | A |
| 9 | BICF2S2394588           | 34358974 | A | 0    | 0      | G |
| 9 | BICF2G630834503         | 34371895 | G | 0    | 0      | A |
| 9 | BICF2G630834518         | 34374828 | G | 0    | 0      | A |
| 9 | BICF2P1346928           | 34390137 | A | 0    | 0      | G |
| 9 | BICF2G630834549         | 34410918 | A | 0.5  | 0.7857 | G |
| 9 | BICF2P61687             | 34420937 | C | 0.25 | 0.1429 | A |
| 9 | BICF2P706041            | 34437181 | G | 0.5  | 0.7857 | A |
| 9 | BICF2G630834559         | 34442607 | A | 0.25 | 0.6429 | G |
| 9 | TIGRP2P126062_rs8704994 | 34457167 | A | 0.25 | 0.1429 | C |
| 9 | BICF2P1232604           | 34466551 | G | 0.75 | 0.3571 | A |
| 9 | BICF2G630834566         | 34479374 | A | 0.25 | 0.6429 | G |
| 9 | BICF2P1333896           | 34499994 | A | 0.25 | 0.1429 | T |
| 9 | BICF2G630834614         | 34504984 | G | 0.25 | 0.1429 | A |
| 9 | BICF2G630834651         | 34521042 | G | 0.25 | 0.1429 | A |
| 9 | BICF2G630834665         | 34533282 | A | 0    | 0      | T |
| 9 | BICF2P990045            | 34537812 | A | 0.5  | 0.2143 | G |
| 9 | BICF2G630834681         | 34552058 | A | 0.5  | 0.7857 | G |
| 9 | BICF2G630834687         | 34560009 | G | 0    | 0      | A |
| 9 | BICF2G630834692         | 34576107 | C | 0    | 0      | A |

|   |                         |          |   |      |        |   |
|---|-------------------------|----------|---|------|--------|---|
| 9 | BICF2G630834698         | 34584807 | A | 0.25 | 0.1429 | G |
| 9 | BICF2G630834701         | 34597503 | A | 0.25 | 0.1429 | G |
| 9 | BICF2G630834702         | 34611838 | A | 0.25 | 0.1429 | G |
| 9 | BICF2S23027935          | 34624817 | A | 0.5  | 0.2143 | G |
| 9 | BICF2G630834711         | 34631343 | A | 0.25 | 0.1429 | G |
| 9 | BICF2G630834713         | 34636210 | G | 0.25 | 0.1429 | A |
| 9 | BICF2G630834716         | 34639093 | G | 0.75 | 0.3333 | A |
| 9 | BICF2G630834731         | 34650699 | A | 0.25 | 0.1429 | C |
| 9 | BICF2G630834738         | 34656519 | G | 0.25 | 0.1429 | A |
| 9 | BICF2G630834747         | 34665747 | G | 0.25 | 0.1429 | A |
| 9 | BICF2G630834761         | 34678144 | A | 0.25 | 0.1429 | G |
| 9 | BICF2G630834765         | 34686161 | A | 0.25 | 0.1429 | G |
| 9 | BICF2P460598            | 34700464 | C | 0.25 | 0.1429 | A |
| 9 | BICF2P742007            | 34711686 | G | 0.25 | 0.6429 | A |
| 9 | BICF2G630834778         | 34729755 | A | 0    | 0      | G |
| 9 | BICF2G630834780         | 34730809 | G | 0.25 | 0.1429 | A |
| 9 | BICF2G630834793         | 34751362 | G | 0.25 | 0.1429 | A |
| 9 | BICF2P567571            | 34759291 | A | 0.75 | 0.3571 | G |
| 9 | BICF2G630834810         | 34769578 | A | 0.25 | 0.6429 | G |
| 9 | BICF2G630834815         | 34776466 | G | 0    | 0      | A |
| 9 | TIGRP2P126109_rs9108341 | 34790380 | G | 0    | 0      | A |
| 9 | BICF2G630834826         | 34801441 | A | 0    | 0      | G |
| 9 | BICF2G630834847         | 34811317 | G | 0.5  | 0.2143 | A |
| 9 | BICF2G630834875         | 34828682 | A | 0.5  | 0.7857 | G |
| 9 | BICF2G630834878         | 34836960 | G | 0    | 0      | A |
| 9 | TIGRP2P126143_rs9175081 | 34867903 | A | 0.75 | 0.8571 | C |
| 9 | BICF2G630834902         | 34874150 | A | 0.75 | 0.3571 | G |
| 9 | BICF2G630834918         | 34880035 | A | 0.25 | 0.1429 | G |
| 9 | BICF2G630834930         | 34901272 | A | 0    | 0      | G |
| 9 | BICF2G630834937         | 34904773 | 0 | 0    | 0      | C |
| 9 | BICF2G630834938         | 34918580 | G | 1    | 1      | A |
| 9 | BICF2G630834939         | 34926806 | 0 | 0    | 0      | G |
| 9 | BICF2G630834943         | 34939097 | G | 0.25 | 0.6429 | C |
| 9 | BICF2G630834951         | 34947381 | A | 0    | 0      | G |
| 9 | TIGRP2P126159_rs8812201 | 34949094 | 0 | 0    | 0      | G |
| 9 | BICF2G630834969         | 34963126 | A | 0    | 0      | G |
| 9 | TIGRP2P126164_rs8867691 | 34998466 | 0 | 0    | 0      | A |
| 9 | BICF2G630834997         | 35028337 | G | 0.5  | 0.6667 | A |
| 9 | BICF2G630834998         | 35043288 | A | 0.25 | 0.6429 | G |
| 9 | BICF2G630835002         | 35095829 | G | 0    | 0      | A |
| 9 | BICF2G630835005         | 35098788 | A | 1    | 1      | G |
| 9 | BICF2S23454768          | 35114509 | G | 0    | 0      | A |
| 9 | BICF2S22938500          | 35123803 | 0 | 0    | 0      | G |
| 9 | BICF2P322014            | 35139005 | 0 | 0    | 0      | A |
| 9 | BICF2P929240            | 35150618 | 0 | 0    | 0      | G |
| 9 | BICF2P262393            | 35157005 | 0 | 0    | 0      | C |
| 9 | BICF2S2319639           | 35172669 | A | 0.5  | 0.2143 | G |

|   |                         |          |   |      |        |   |
|---|-------------------------|----------|---|------|--------|---|
| 9 | BICF2S23535421          | 35180836 | A | 1    | 1      | G |
| 9 | BICF2G630835029         | 35197123 | A | 0.25 | 0.1429 | G |
| 9 | BICF2G630835034         | 35204040 | A | 0    | 0      | G |
| 9 | BICF2P285716            | 35214288 | A | 0    | 0      | G |
| 9 | BICF2P1409608           | 35225893 | G | 1    | 1      | C |
| 9 | BICF2S2319072           | 35251567 | G | 1    | 1      | A |
| 9 | BICF2G630835049         | 35264352 | A | 0.75 | 0.8571 | G |
| 9 | BICF2P1299747           | 35280786 | G | 0.75 | 0.8571 | A |
| 9 | BICF2G630835055         | 35286704 | C | 0.75 | 0.9167 | A |
| 9 | BICF2G630835062         | 35292186 | G | 0.25 | 0.6429 | A |
| 9 | BICF2G630835075         | 35298039 | G | 0    | 0      | A |
| 9 | BICF2G630835109         | 35320954 | G | 0.25 | 0.6429 | A |
| 9 | BICF2G630835127         | 35329054 | A | 0.25 | 0.1429 | C |
| 9 | BICF2G630835134         | 35350310 | G | 0    | 0      | A |
| 9 | BICF2G630835140         | 35352380 | A | 0    | 0      | G |
| 9 | BICF2G630835159         | 35371920 | A | 0    | 0      | C |
| 9 | BICF2G630835167         | 35378067 | A | 0    | 0      | G |
| 9 | BICF2P500923            | 35401486 | G | 0.5  | 0.7857 | A |
| 9 | BICF2P515478            | 35441401 | A | 0.25 | 0.6429 | G |
| 9 | BICF2G630835179         | 35453694 | G | 0.5  | 0.7857 | A |
| 9 | BICF2P72186             | 35455368 | G | 0.5  | 0.7857 | A |
| 9 | BICF2G630835181         | 35460397 | G | 0.5  | 0.7857 | A |
| 9 | TIGRP2P126171_rs9026734 | 35468283 | 0 | 0    | 0      | C |
| 9 | BICF2G630835183         | 35479269 | A | 0.5  | 0.7857 | C |
| 9 | BICF2G630835188         | 35489664 | A | 0.5  | 0.7857 | C |
| 9 | BICF2G630835202         | 35504893 | G | 0.5  | 0.7857 | A |
| 9 | BICF2G630835214         | 35514332 | G | 0.5  | 0.7857 | A |
| 9 | BICF2G630835218         | 35524641 | G | 0.5  | 0.7857 | A |
| 9 | BICF2P976417            | 35556935 | 0 | 0    | 0      | G |
| 9 | BICF2G630835220         | 35569993 | A | 0.5  | 0.7857 | G |
| 9 | BICF2G630835221         | 35581444 | G | 0.25 | 0.6429 | A |
| 9 | BICF2G630835223         | 35595348 | G | 0    | 0      | A |
| 9 | BICF2S23345425          | 35606279 | A | 0.5  | 0.1    | G |
| 9 | BICF2P274574            | 35616538 | 0 | 0    | 0      | A |
| 9 | BICF2G630835225         | 35635551 | A | 0.25 | 0.6429 | G |
| 9 | BICF2S2296203           | 35671597 | A | 0.25 | 0.1429 | G |
| 9 | BICF2P220507            | 35676099 | 0 | 0    | 0      | A |
| 9 | TIGRP2P126175_rs9141882 | 35691218 | 0 | 0    | 0      | G |
| 9 | BICF2P283506            | 35706022 | A | 0    | 0      | G |
| 9 | BICF2G630835236         | 35708735 | G | 0    | 0      | A |
| 9 | BICF2G630835241         | 35719582 | A | 0.25 | 0.6429 | C |
| 9 | BICF2G630835244         | 35724781 | A | 0.25 | 0.6667 | G |
| 9 | TIGRP2P126176_rs9191899 | 35733151 | 0 | 0    | 0      | G |
| 9 | BICF2G630835259         | 35743892 | A | 0.75 | 0.8571 | C |
| 9 | BICF2P756517            | 35760417 | A | 0.25 | 0.1429 | G |
| 9 | BICF2G630835284         | 35775154 | A | 0    | 0      | G |
| 9 | BICF2G630835295         | 35778983 | A | 0    | 0      | G |

|   |                 |          |   |      |        |   |
|---|-----------------|----------|---|------|--------|---|
| 9 | BICF2G630835298 | 35783414 | A | 0    | 0      | G |
| 9 | BICF2G630835306 | 35787015 | G | 0.5  | 0.2143 | A |
| 9 | BICF2G630835371 | 35807871 | A | 1    | 1      | C |
| 9 | BICF2G630835384 | 35812061 | A | 1    | 1      | G |
| 9 | BICF2G630835400 | 35825603 | A | 0.5  | 0.1    | G |
| 9 | BICF2G630835408 | 35836676 | A | 0.5  | 0.2143 | G |
| 9 | BICF2P520511    | 35856878 | G | 0.5  | 0.2143 | A |
| 9 | BICF2P992513    | 35865650 | A | 0.5  | 0.2143 | G |
| 9 | BICF2G630835436 | 35870411 | A | 0.5  | 0.2143 | G |
| 9 | BICF2G630835442 | 35871080 | A | 0.5  | 0.2143 | T |
| 9 | BICF2G630835465 | 35883569 | G | 0    | 0      | A |
| 9 | BICF2G630835466 | 35893015 | A | 0    | 0      | G |
| 9 | BICF2G630835468 | 35916622 | G | 0.5  | 0.2143 | A |
| 9 | BICF2P7272      | 35929782 | 0 | 0    | 0      | G |
| 9 | BICF2S23129241  | 35942414 | G | 0.5  | 0.2143 | A |
| 9 | BICF2G630835479 | 35958985 | G | 0    | 0      | A |
| 9 | BICF2P1436081   | 35970660 | A | 0    | 0      | G |
| 9 | BICF2P1436079   | 35972308 | C | 1    | 1      | G |
| 9 | BICF2P444707    | 35984516 | G | 1    | 1      | A |
| 9 | BICF2G630835485 | 36001950 | G | 1    | 1      | C |
| 9 | BICF2G630835487 | 36008826 | G | 1    | 1      | A |
| 9 | BICF2G630835514 | 36047518 | A | 1    | 1      | G |
| 9 | BICF2P161486    | 36052653 | 0 | 0    | 0      | A |
| 9 | BICF2S23754553  | 36069998 | A | 1    | 1      | G |
| 9 | BICF2P231335    | 36082209 | 0 | 0    | 0      | C |
| 9 | BICF2G630835521 | 36109993 | A | 0    | 0      | G |
| 9 | BICF2G630835522 | 36110703 | A | 0.25 | 0.6429 | G |
| 9 | BICF2S23744057  | 36124815 | A | 1    | 1      | G |
| 9 | BICF2S23721267  | 36150732 | G | 0.5  | 0.7857 | A |
| 9 | BICF2P36978     | 36163517 | A | 0.5  | 0.7857 | G |
| 9 | BICF2S23042367  | 36170165 | A | 0.5  | 0.2143 | C |
| 9 | BICF2P1352207   | 36184164 | 0 | 0    | 0      | G |
| 9 | BICF2P738000    | 36190831 | A | 0.5  | 0.7857 | G |
| 9 | BICF2G630835536 | 36209379 | A | 0.5  | 0.7857 | G |
| 9 | BICF2G630835558 | 36219690 | A | 0    | 0      | C |
| 9 | BICF2P939668    | 36232996 | 0 | 0    | 0      | G |
| 9 | BICF2S22912444  | 36237254 | G | 0.5  | 0.7857 | A |
| 9 | BICF2G630835589 | 36251709 | G | 0.5  | 0.2143 | A |
| 9 | BICF2G630835599 | 36261626 | G | 0    | 0      | A |
| 9 | BICF2G630835610 | 36272945 | A | 0    | 0      | G |
| 9 | BICF2G630835611 | 36278415 | A | 0    | 0      | G |
| 9 | BICF2P977251    | 36302389 | G | 1    | 1      | A |
| 9 | BICF2P881745    | 36314602 | A | 0    | 0      | G |
| 9 | BICF2P563733    | 36336258 | A | 1    | 1      | G |
| 9 | BICF2S23112305  | 36344800 | G | 0    | 0      | C |
| 9 | BICF2P1257515   | 36356781 | A | 1    | 1      | G |
| 9 | BICF2P1428969   | 36373814 | G | 0    | 0      | A |

|   |                         |          |   |     |        |   |
|---|-------------------------|----------|---|-----|--------|---|
| 9 | BICF2S23355768          | 36375420 | A | 0   | 0      | G |
| 9 | BICF2P791837            | 36397059 | A | 0   | 0      | G |
| 9 | BICF2P929417            | 36400807 | A | 1   | 1      | G |
| 9 | BICF2P1381099           | 36411260 | 0 | 0   | 0      | A |
| 9 | BICF2G630835629         | 36430971 | A | 0   | 0      | G |
| 9 | BICF2P214370            | 36443150 | 0 | 0   | 0      | A |
| 9 | BICF2P1263641           | 36457488 | G | 0.5 | 0.7857 | A |
| 9 | BICF2P1263640           | 36457532 | A | 0.5 | 0.2143 | G |
| 9 | BICF2G630835632         | 36476472 | 0 | 0   | 0      | A |
| 9 | BICF2S22955019          | 36496633 | C | 0   | 0      | A |
| 9 | TIGRP2P126196_rs8672929 | 36506257 | 0 | 0   | 0      | A |
| 9 | BICF2P203163            | 36519050 | 0 | 0   | 0      | A |
| 9 | BICF2G630835636         | 36540383 | A | 0   | 0      | C |
| 9 | TIGRP2P126201_rs8645124 | 36568382 | 0 | 0   | 0      | A |
| 9 | BICF2P1401890           | 36580998 | G | 0.5 | 0.2143 | A |
| 9 | BICF2G630835642         | 36604582 | 0 | 0   | 0      | A |
| 9 | BICF2P37374             | 36661134 | G | 0.5 | 0.7857 | A |
| 9 | BICF2G630835648         | 36677741 | G | 0   | 0      | A |
| 9 | TIGRP2P126206_rs9065709 | 36754015 | 0 | 0   | 0      | A |
| 9 | BICF2P1372541           | 36771372 | 0 | 0   | 0      | C |
| 9 | BICF2G630835652         | 36812653 | G | 0   | 0      | A |
| 9 | G554f20S145             | 36836459 | A | 0   | 0      | G |
| 9 | BICF2P1016594           | 36866936 | 0 | 0   | 0      | G |
| 9 | BICF2S23223061          | 36873235 | 0 | 0   | 0      | G |
| 9 | BICF2S2327145           | 36882814 | A | 0   | 0      | G |
| 9 | TIGRP2P126211_rs8697703 | 36898252 | 0 | 0   | 0      | A |
| 9 | BICF2P506752            | 36907558 | A | 0   | 0      | G |
| 9 | BICF2G630835679         | 36926394 | C | 0   | 0      | A |
| 9 | BICF2G630835683         | 36928054 | A | 0   | 0      | G |
| 9 | BICF2P1060321           | 36947882 | 0 | 0   | 0      | A |
| 9 | BICF2P661018            | 36953954 | 0 | 0   | 0      | A |
| 9 | BICF2P1403618           | 36963437 | 0 | 0   | 0      | A |
| 9 | BICF2G630835693         | 36973872 | C | 0   | 0      | G |
| 9 | BICF2G630835696         | 36990350 | A | 0   | 0      | G |
| 9 | BICF2G630835699         | 37002989 | A | 0   | 0      | G |
| 9 | BICF2G630835701         | 37008674 | 0 | 0   | 0      | G |
| 9 | BICF2G630835711         | 37020059 | T | 0   | 0      | A |
| 9 | BICF2G630835732         | 37035203 | G | 0   | 0      | A |
| 9 | BICF2G630835753         | 37047450 | A | 0   | 0      | G |
| 9 | BICF2G630835762         | 37055117 | G | 0   | 0      | A |
| 9 | BICF2G630835777         | 37072140 | G | 0   | 0      | A |
| 9 | BICF2G630835788         | 37081352 | G | 0   | 0      | A |
| 9 | BICF2S2354885           | 37091173 | G | 0   | 0      | A |
| 9 | BICF2G630835816         | 37107410 | G | 0   | 0      | A |
| 9 | BICF2G630835821         | 37129410 | G | 0   | 0      | A |
| 9 | BICF2G630835824         | 37136522 | A | 0   | 0      | G |
| 9 | BICF2G630835834         | 37147898 | G | 0   | 0      | A |

|   |                 |          |   |     |        |   |
|---|-----------------|----------|---|-----|--------|---|
| 9 | BICF2G630835852 | 37161142 | A | 0   | 0      | G |
| 9 | BICF2G630835868 | 37176309 | G | 0   | 0      | A |
| 9 | BICF2G630835882 | 37185046 | A | 0   | 0      | G |
| 9 | BICF2P224043    | 37213218 | A | 0.5 | 0.1667 | G |
| 9 | BICF2S23349026  | 37222555 | G | 0.5 | 0.2143 | A |
| 9 | BICF2S23432177  | 37230849 | 0 | 0   | 0      | G |
| 9 | BICF2G630835944 | 37241043 | A | 0   | 0      | G |
| 9 | BICF2G630835960 | 37259704 | C | 0.5 | 0.2143 | A |
| 9 | BICF2G630835961 | 37262825 | T | 0.5 | 0.2143 | A |
| 9 | BICF2G630835962 | 37263005 | A | 0.5 | 0.2143 | C |
| 9 | BICF2G630835964 | 37264397 | A | 0.5 | 0.2143 | G |
| 9 | BICF2G630835974 | 37272569 | G | 0.5 | 0.2143 | A |
| 9 | BICF2G630835989 | 37286196 | C | 0   | 0      | A |
| 9 | BICF2G630836012 | 37298087 | G | 0   | 0      | A |
| 9 | BICF2P312765    | 37308929 | A | 0.5 | 0.2143 | G |
| 9 | BICF2P918457    | 37317951 | T | 0   | 0      | A |
| 9 | BICF2G630836042 | 37336055 | G | 0   | 0      | A |
| 9 | BICF2P121124    | 37352533 | G | 0   | 0      | A |
| 9 | BICF2S23423866  | 37367547 | C | 0   | 0      | A |
| 9 | BICF2G630836073 | 37378242 | A | 0   | 0      | G |
| 9 | BICF2G630836094 | 37399884 | G | 0   | 0      | A |
| 9 | BICF2P1225649   | 37417533 | A | 0   | 0      | G |
| 9 | BICF2G630836099 | 37432235 | G | 0   | 0      | A |
| 9 | BICF2G630836101 | 37437915 | G | 0   | 0      | A |
| 9 | BICF2G630836102 | 37453317 | A | 0   | 0      | G |
| 9 | BICF2P920890    | 37460114 | G | 0.5 | 0.7857 | A |
| 9 | BICF2P62310     | 37468526 | G | 0.5 | 0.7857 | A |
| 9 | BICF2P943080    | 37480293 | A | 0.5 | 0.7857 | G |
| 9 | BICF2P309205    | 37491968 | G | 0.5 | 0.7857 | A |
| 9 | BICF2G630836108 | 37504858 | 0 | 0   | 0      | A |
| 9 | BICF2G630836109 | 37519916 | 0 | 0   | 0      | G |
| 9 | BICF2P835256    | 37533691 | G | 0.5 | 0.2143 | A |
| 9 | BICF2S22940626  | 37539543 | C | 0.5 | 0.2143 | A |
| 9 | BICF2G630836114 | 37558924 | 0 | 0   | 0      | A |
| 9 | BICF2G630836116 | 37565942 | A | 0.5 | 0.2143 | G |
| 9 | BICF2G630836117 | 37578479 | A | 0.5 | 0.2143 | G |
| 9 | BICF2P807376    | 37592042 | A | 0.5 | 0.8333 | C |
| 9 | BICF2G630836121 | 37597835 | 0 | 0   | 0      | C |
| 9 | BICF2P763284    | 37630102 | 0 | 0   | 0      | T |
| 9 | BICF2G630836132 | 37649821 | A | 0.5 | 0.2143 | G |
| 9 | BICF2G630836133 | 37659095 | A | 0.5 | 0.1667 | C |
| 9 | BICF2G630836139 | 37679430 | G | 1   | 1      | A |
| 9 | BICF2S23325673  | 37700684 | A | 1   | 1      | G |
| 9 | BICF2G630836146 | 37710165 | 0 | 0   | 0      | C |
| 9 | BICF2P751777    | 37729220 | A | 1   | 1      | C |
| 9 | BICF2P1337755   | 37734122 | A | 0.5 | 0.7857 | T |
| 9 | BICF2G630836158 | 37765579 | 0 | 0   | 0      | A |

|   |                 |          |   |     |        |   |
|---|-----------------|----------|---|-----|--------|---|
| 9 | BICF2P435582    | 37766183 | A | 1   | 1      | T |
| 9 | BICF2G630836177 | 37779346 | 0 | 0   | 0      | G |
| 9 | BICF2P768698    | 37791568 | A | 1   | 1      | G |
| 9 | BICF2G630836211 | 37813264 | 0 | 0   | 0      | G |
| 9 | BICF2G630836219 | 37825061 | 0 | 0   | 0      | A |
| 9 | BICF2P739055    | 37879856 | 0 | 0   | 0      | A |
| 9 | BICF2G630836255 | 37895840 | 0 | 0   | 0      | C |
| 9 | BICF2P395907    | 37917201 | G | 0.5 | 0.7857 | A |
| 9 | BICF2G630836268 | 37936717 | A | 0   | 0      | G |
| 9 | BICF2G630836272 | 37941157 | A | 0   | 0      | G |
| 9 | BICF2G630836278 | 37951211 | G | 0   | 0      | A |
| 9 | BICF2P1427054   | 37965807 | G | 0   | 0      | C |
| 9 | BICF2G630836280 | 37977100 | A | 0.5 | 0.8333 | C |
| 9 | BICF2G630836291 | 38011817 | A | 0   | 0      | G |
| 9 | BICF2G630836293 | 38022555 | G | 0   | 0      | A |
| 9 | BICF2P635069    | 38033201 | 0 | 0   | 0      | A |
| 9 | BICF2G630836294 | 38046024 | G | 0   | 0      | A |
| 9 | BICF2G630836300 | 38071888 | A | 0.5 | 0.7857 | G |
| 9 | BICF2G630836306 | 38076908 | A | 0   | 0      | G |
| 9 | BICF2G630836318 | 38099586 | A | 0   | 0      | G |
| 9 | BICF2P785313    | 38112330 | G | 0   | 0      | A |
| 9 | BICF2G630836329 | 38133017 | G | 0   | 0      | A |
| 9 | BICF2P1031527   | 38139354 | A | 1   | 1      | G |
| 9 | BICF2P326735    | 38169379 | 0 | 0   | 0      | A |
| 9 | BICF2P1236494   | 38199395 | G | 1   | 1      | A |
| 9 | BICF2P558058    | 38246475 | A | 1   | 1      | G |
| 9 | BICF2P1438677   | 38254985 | A | 1   | 1      | C |
| 9 | BICF2P91650     | 38315178 | A | 1   | 1      | G |
| 9 | BICF2P1181182   | 38318828 | A | 1   | 1      | G |
| 9 | BICF2P334463    | 38333629 | A | 1   | 1      | G |
| 9 | BICF2P1176750   | 38350203 | A | 1   | 1      | G |
| 9 | BICF2G630836363 | 38365545 | A | 1   | 1      | G |
| 9 | BICF2G630836389 | 38401831 | G | 0   | 0      | A |
| 9 | BICF2G630836404 | 38417716 | A | 0   | 0      | G |
| 9 | BICF2G630836412 | 38423943 | G | 0   | 0      | A |
| 9 | BICF2G630836421 | 38443885 | G | 0   | 0      | A |
| 9 | BICF2G630836452 | 38467001 | G | 0   | 0      | A |
| 9 | BICF2G630836466 | 38478451 | 0 | 0   | 0      | A |
| 9 | BICF2P377018    | 38486274 | 0 | 0   | 0      | A |
| 9 | BICF2P623039    | 38503122 | G | 0.5 | 0.2143 | A |
| 9 | BICF2P1186457   | 38508817 | A | 0.5 | 0.1667 | G |
| 9 | BICF2G630836476 | 38512050 | A | 0.5 | 0.2143 | G |
| 9 | BICF2G630836487 | 38527140 | G | 0   | 0      | A |
| 9 | BICF2G630836491 | 38544278 | 0 | 0   | 0      | C |
| 9 | BICF2G630836496 | 38556854 | G | 0   | 0      | A |
| 9 | BICF2S2374339   | 38577770 | G | 0   | 0      | A |
| 9 | BICF2G630836509 | 38583692 | A | 0   | 0      | G |



|   |                 |          |   |     |        |   |
|---|-----------------|----------|---|-----|--------|---|
| 9 | BICF2G630836514 | 38596178 | A | 0   | 0      | G |
| 9 | BICF2G630836526 | 38610476 | 0 | 0   | 0      | C |
| 9 | BICF2G630836547 | 38617962 | G | 0   | 0      | A |
| 9 | BICF2G630836566 | 38624871 | A | 0   | 0      | G |
| 9 | BICF2P697921    | 38627593 | G | 0.5 | 0.2143 | A |
| 9 | BICF2G630836570 | 38627898 | A | 0   | 0      | G |
| 9 | BICF2G630836574 | 38632075 | A | 0   | 0      | G |
| 9 | BICF2P526484    | 38648522 | A | 0.5 | 0.2143 | G |
| 9 | BICF2P1376797   | 38655873 | A | 0.5 | 0.7857 | G |
| 9 | BICF2G630836601 | 38666161 | A | 0   | 0      | G |
| 9 | BICF2G630836608 | 38673279 | 0 | 0   | 0      | G |
| 9 | BICF2P1006689   | 38675549 | A | 0.5 | 0.7857 | G |
| 9 | BICF2G630836616 | 38689308 | C | 0   | 0      | A |
| 9 | BICF2G630836630 | 38706782 | A | 0   | 0      | G |
| 9 | BICF2G630836640 | 38715967 | A | 0   | 0      | G |
| 9 | BICF2P853239    | 38723347 | G | 0   | 0      | A |
| 9 | BICF2G630836656 | 38744036 | G | 0   | 0      | A |
| 9 | BICF2G630836674 | 38760820 | A | 0   | 0      | G |
| 9 | BICF2G630836695 | 38778604 | A | 0.5 | 0.7857 | G |
| 9 | BICF2S22937836  | 38794934 | A | 0   | 0      | G |
| 9 | BICF2S23623508  | 38805564 | A | 0.5 | 0.2143 | G |
| 9 | BICF2G630836714 | 38822973 | A | 0   | 0      | C |
| 9 | BICF2G630836723 | 38844516 | A | 0   | 0      | G |
| 9 | BICF2G630836726 | 38850859 | A | 0   | 0      | G |
| 9 | BICF2G630836730 | 38858846 | G | 0   | 0      | A |
| 9 | BICF2G630836734 | 38871920 | 0 | 0   | 0      | G |
| 9 | BICF2P853269    | 38888906 | A | 0.5 | 0.7857 | C |
| 9 | BICF2G630836736 | 38895898 | A | 0   | 0      | G |
| 9 | BICF2G630836744 | 38909771 | C | 0   | 0      | A |
| 9 | BICF2P199847    | 38924810 | A | 0   | 0      | G |
| 9 | BICF2P1422473   | 38947642 | 0 | 0   | 0      | A |
| 9 | BICF2G630836769 | 39003531 | A | 1   | 1      | G |
| 9 | BICF2G630836792 | 39064200 | G | 1   | 1      | A |
| 9 | BICF2S23345909  | 39066362 | A | 0   | 0      | G |
| 9 | BICF2P1295921   | 39087110 | C | 0   | 0      | G |
| 9 | BICF2G630836811 | 39106375 | A | NA  | 1      | G |
| 9 | BICF2G630836834 | 39143487 | C | 0.5 | 0.2143 | A |
| 9 | BICF2G630836847 | 39161985 | G | 0   | 0      | A |
| 9 | BICF2S2458527   | 39193696 | 0 | 0   | 0      | A |
| 9 | BICF2G630836857 | 39211449 | G | 0   | 0      | A |
| 9 | BICF2G630836862 | 39259632 | 0 | 0   | 0      | G |
| 9 | BICF2S22964729  | 39263097 | A | 0   | 0      | G |
| 9 | BICF2P878673    | 39288973 | 0 | 0   | 0      | A |
| 9 | BICF2G630836866 | 39302475 | G | 1   | 1      | C |
| 9 | BICF2P850542    | 39308353 | A | 1   | 1      | G |
| 9 | BICF2G630836872 | 39323762 | A | 0   | 0      | G |
| 9 | BICF2G630836876 | 39331800 | A | 1   | 1      | C |

|   |                         |          |   |     |        |   |
|---|-------------------------|----------|---|-----|--------|---|
| 9 | BICF2P1338965           | 39347257 | G | 0   | 0      | A |
| 9 | BICF2P1331734           | 39361603 | C | 0   | 0      | A |
| 9 | BICF2G630836904         | 39382795 | A | 0   | 0      | C |
| 9 | BICF2G630836919         | 39409015 | G | 0.5 | 0.7857 | A |
| 9 | BICF2G630836929         | 39428473 | A | NA  | NA     | G |
| 9 | G555f30S162             | 39457214 | 0 | 0   | 0      | G |
| 9 | BICF2P1066151           | 39479097 | G | 0   | 0      | A |
| 9 | BICF2G630836932         | 39482937 | 0 | 0   | 0      | G |
| 9 | BICF2G630836939         | 39501193 | 0 | 0   | 0      | C |
| 9 | BICF2G630836941         | 39505853 | 0 | 0   | 0      | G |
| 9 | BICF2S23440486          | 39519312 | G | 0   | 0      | C |
| 9 | BICF2G630836945         | 39541656 | T | 0   | 0      | A |
| 9 | BICF2G630836958         | 39562421 | A | 0   | 0      | G |
| 9 | TIGRP2P126305_rs8829062 | 39599430 | 0 | 0   | 0      | C |
| 9 | BICF2G630836974         | 39623184 | G | 0   | 0      | A |
| 9 | BICF2S23259973          | 39665562 | G | 0   | 0      | A |
| 9 | BICF2G630837023         | 39678839 | 0 | 0   | 0      | G |
| 9 | BICF2G630837052         | 39692469 | A | 0   | 0      | G |
| 9 | BICF2S23321769          | 39765028 | A | 1   | 1      | C |
| 9 | BICF2G630837109         | 39771733 | A | 1   | 1      | G |
| 9 | BICF2G630837112         | 39785735 | 0 | 0   | 0      | C |
| 9 | BICF2P1058910           | 39798504 | C | NA  | 0      | A |
| 9 | BICF2P246765            | 39804122 | A | 0   | 0      | G |
| 9 | BICF2P686074            | 39813868 | G | 0.5 | 0.2143 | A |
| 9 | BICF2G630837138         | 39817078 | G | 0.5 | 0.2143 | A |
| 9 | BICF2G630837169         | 39836274 | A | 1   | 1      | G |
| 9 | BICF2S23430015          | 39852464 | A | 0   | 0      | C |
| 9 | BICF2G630837209         | 39864090 | A | 0   | 0      | G |
| 9 | BICF2G630837233         | 39885922 | A | 0   | 0      | C |
| 9 | BICF2G630837240         | 39900430 | G | 0   | 0      | A |
| 9 | BICF2G630837260         | 39926171 | G | 1   | 1      | A |
| 9 | BICF2S23910468          | 39933066 | 0 | 0   | 0      | G |
| 9 | BICF2G630837271         | 39933873 | G | 0.5 | 0.2143 | A |
| 9 | BICF2G630837296         | 39957193 | G | 0.5 | 0.2143 | A |
| 9 | BICF2G630837298         | 39959109 | A | 0.5 | 0.2143 | G |
| 9 | BICF2G630837302         | 39965412 | A | 0.5 | 0.2143 | G |
| 9 | BICF2P827755            | 39985980 | A | 0   | 0      | G |
| 9 | BICF2G630837307         | 40014683 | A | 0.5 | 0.7857 | G |
| 9 | BICF2P389979            | 40030310 | A | 0.5 | 0.5    | G |
| 9 | BICF2G630837347         | 40032989 | G | 0   | 0      | C |
| 9 | BICF2G630837364         | 40043645 | G | 0.5 | 0.7857 | A |
| 9 | BICF2G630837373         | 40084248 | A | 0.5 | 0.2143 | G |
| 9 | BICF2G630837375         | 40091942 | G | 0   | 0      | A |
| 9 | TIGRP2P126340_rs8998178 | 40106067 | 0 | 0   | 0      | A |
| 9 | BICF2G630837390         | 40117301 | G | 0   | 0      | A |
| 9 | BICF2P331413            | 40124915 | 0 | 0   | 0      | G |
| 9 | BICF2G630837405         | 40157655 | A | 0.5 | 0.2143 | G |

|   |                         |          |   |     |        |   |
|---|-------------------------|----------|---|-----|--------|---|
| 9 | BICF2P272135            | 40163460 | G | 0.5 | 0.2143 | C |
| 9 | BICF2G630837411         | 40183858 | 0 | 0   | 0      | G |
| 9 | BICF2G630837416         | 40194387 | A | 0   | 0      | G |
| 9 | TIGRP2P126345_rs8763412 | 40207209 | G | 0.5 | 0.2143 | A |
| 9 | BICF2P662113            | 40224394 | A | 0.5 | 0.7857 | G |
| 9 | BICF2P311014            | 40228198 | G | 0.5 | 0.7857 | A |
| 9 | BICF2G630837432         | 40244010 | 0 | 0   | 0      | G |
| 9 | BICF2S23433032          | 40261194 | G | 0.5 | 0.7857 | A |
| 9 | BICF2P1055130           | 40268330 | G | 0.5 | 0.7857 | A |
| 9 | BICF2S23160635          | 40268515 | A | 0.5 | 0.7857 | G |
| 9 | BICF2P131211            | 40282823 | G | 0   | 0      | A |
| 9 | BICF2P121708            | 40291078 | G | 0.5 | 0.7857 | A |
| 9 | TIGRP2P126366_rs8739331 | 40313799 | A | 0.5 | 0.7857 | C |
| 9 | BICF2G630837435         | 40325187 | 0 | 0   | 0      | C |
| 9 | TIGRP2P126369_rs8805380 | 40339239 | G | 0.5 | 0.7857 | A |
| 9 | TIGRP2P126373_rs9017411 | 40345777 | C | 0   | 0      | A |
| 9 | BICF2G630837436         | 40362001 | 0 | 0   | 0      | A |
| 9 | BICF2S23910388          | 40366391 | A | 0.5 | 0.7857 | G |
| 9 | BICF2P219872            | 40389398 | G | 0   | 0      | A |
| 9 | BICF2P467674            | 40423768 | G | 0   | 0      | C |
| 9 | BICF2G630837437         | 40439819 | 0 | 0   | 0      | G |
| 9 | BICF2G630837438         | 40446015 | 0 | 0   | 0      | A |
| 9 | BICF2G630837439         | 40484184 | 0 | 0   | 0      | G |
| 9 | BICF2P767441            | 40500880 | A | 0   | 0      | G |
| 9 | BICF2P727496            | 40551047 | 0 | 0   | 0      | A |
| 9 | BICF2P859060            | 40561623 | A | 0   | 0      | G |
| 9 | TIGRP2P126395_rs8905706 | 40587651 | 0 | 0   | 0      | A |
| 9 | BICF2P952701            | 40598113 | G | 0.5 | 0.2143 | A |
| 9 | BICF2G630837449         | 40619408 | G | 0.5 | 0.2143 | A |
| 9 | BICF2G630837452         | 40632856 | A | 0   | 0      | G |
| 9 | BICF2P853014            | 40642007 | G | 1   | 1      | A |
| 9 | BICF2G630837490         | 40706663 | A | 0   | 0      | G |
| 9 | BICF2S23438813          | 40732037 | A | 0.5 | 0.7857 | G |
| 9 | BICF2G630837544         | 40750769 | A | 0   | 0      | C |
| 9 | BICF2P852764            | 40774215 | G | 0   | 0      | A |
| 9 | BICF2S2393657           | 40783215 | 0 | 0   | 0      | C |
| 9 | BICF2S2364431           | 40793070 | C | 0   | 0      | A |
| 9 | BICF2P750554            | 40816498 | 0 | 0   | 0      | G |
| 9 | BICF2S23617077          | 40825619 | G | 0   | 0      | C |
| 9 | BICF2G630837568         | 40839715 | 0 | 0   | 0      | A |
| 9 | BICF2S23454483          | 40860219 | C | 0.5 | 0.7857 | G |
| 9 | BICF2G630837570         | 40877332 | G | 0.5 | 0.7857 | A |
| 9 | BICF2G630837620         | 40897405 | 0 | 0   | 0      | G |
| 9 | BICF2G630837627         | 40907489 | A | 0   | 0      | G |
| 9 | BICF2G630837636         | 40923849 | 0 | 0   | 0      | C |
| 9 | BICF2G630837662         | 40934630 | G | 0.5 | 0.8333 | A |
| 9 | BICF2G630837675         | 40943490 | A | 0.5 | 0.7857 | G |

|   |                         |          |   |     |        |   |
|---|-------------------------|----------|---|-----|--------|---|
| 9 | BICF2G630837693         | 40950922 | A | 0.5 | 0.7857 | G |
| 9 | TIGRP2P126430_rs9087986 | 40962727 | G | 0   | 0      | C |
| 9 | BICF2P1282614           | 40971579 | G | 0   | 0      | A |
| 9 | BICF2G630837739         | 40978211 | A | 0.5 | 0.2143 | C |
| 9 | BICF2G630837761         | 40996143 | G | 0.5 | 0.2143 | A |
| 9 | BICF2G630837762         | 41008824 | G | 0   | 0      | A |
| 9 | BICF2G630837764         | 41013799 | 0 | 0   | 0      | C |
| 9 | BICF2P233996            | 41024684 | C | 0   | 0      | A |
| 9 | TIGRP2P126454_rs8973791 | 41043512 | A | 0.5 | 0.2143 | G |
| 9 | TIGRP2P126468_rs9127184 | 41070083 | A | 0.5 | 0.2143 | G |
| 9 | BICF2P393208            | 41079578 | G | 0.5 | 0.2143 | A |
| 9 | BICF2P312237            | 41129838 | A | 0.5 | 0.7857 | C |
| 9 | BICF2P83286             | 41139274 | A | 0.5 | 0.7857 | G |
| 9 | BICF2P129144            | 41171348 | G | 0.5 | 0.2143 | A |
| 9 | BICF2S23130058          | 41186888 | 0 | 0   | 0      | G |
| 9 | BICF2G630837790         | 41198609 | A | 0.5 | 0.2143 | G |
| 9 | BICF2G630837801         | 41207316 | G | 0   | 0      | A |
| 9 | BICF2G630837818         | 41226690 | A | 0.5 | 0.2143 | G |
| 9 | BICF2G630837821         | 41229413 | C | 0.5 | 0.2143 | G |
| 9 | BICF2G630837829         | 41246540 | 0 | 0   | 0      | G |
| 9 | BICF2G630837839         | 41253696 | A | 0   | 0      | G |
| 9 | BICF2G630837855         | 41262649 | G | 0   | 0      | A |
| 9 | BICF2G630837872         | 41276849 | A | 0   | 0      | G |
| 9 | BICF2G630837884         | 41303210 | A | 0   | 0      | G |
| 9 | BICF2G630837892         | 41314122 | A | 0   | 0      | C |
| 9 | BICF2G630837904         | 41367726 | 0 | 0   | 0      | C |
| 9 | BICF2P1281377           | 41389479 | 0 | 0   | 0      | A |
| 9 | BICF2S23231243          | 41405593 | A | 0.5 | 0.2143 | G |
| 9 | BICF2P1216333           | 41428388 | A | 0   | 0      | G |
| 9 | BICF2G630837942         | 41428681 | A | 0   | 0      | G |
| 9 | BICF2P1422641           | 41431713 | A | 0   | 0      | G |
| 9 | BICF2P1422642           | 41431889 | G | 0   | 0      | C |
| 9 | BICF2G630837953         | 41440011 | C | 1   | 1      | A |
| 9 | BICF2G630837975         | 41446712 | A | 0   | 0      | C |
| 9 | BICF2S22928352          | 41481366 | G | 1   | 1      | A |
| 9 | BICF2S23124256          | 41492532 | A | 1   | 1      | G |
| 9 | BICF2G630838059         | 41505381 | G | 1   | 1      | A |
| 9 | BICF2G630838079         | 41545298 | C | 0   | 0      | A |
| 9 | BICF2G630838083         | 41547795 | A | 0   | 0      | G |
| 9 | BICF2G630838092         | 41554428 | G | 0   | 0      | A |
| 9 | BICF2G630838110         | 41571729 | A | 0   | 0      | G |
| 9 | BICF2P328422            | 41572615 | A | 0.5 | 0.2143 | G |
| 9 | BICF2P859723            | 41582281 | C | 0.5 | 0.7857 | A |
| 9 | BICF2P622463            | 41597515 | C | 0.5 | 0.2143 | A |
| 9 | BICF2P556534            | 41618018 | A | 0.5 | 0.2143 | G |
| 9 | BICF2G630838172         | 41639582 | G | 0   | 0      | A |
| 9 | BICF2G630838177         | 41643223 | A | 1   | 1      | C |

|   |                         |          |   |     |        |   |
|---|-------------------------|----------|---|-----|--------|---|
| 9 | BICF2P881331            | 41658394 | G | 0.5 | 0.2143 | C |
| 9 | BICF2G630838184         | 41665729 | A | 0.5 | 0.2143 | G |
| 9 | BICF2S23115623          | 41691942 | A | 0   | 0      | G |
| 9 | BICF2G630838231         | 41700327 | A | 0   | 0      | G |
| 9 | BICF2G630838240         | 41712816 | A | 0   | 0      | G |
| 9 | BICF2G630838275         | 41728462 | A | 0   | 0      | G |
| 9 | BICF2G630838282         | 41744787 | A | 0.5 | 0.2143 | G |
| 9 | BICF2G630838288         | 41758248 | G | 0   | 0      | A |
| 9 | BICF2P881974            | 41788056 | A | 0   | 0      | C |
| 9 | BICF2S23538895          | 41793590 | G | 0   | 0      | A |
| 9 | BICF2P964411            | 41824296 | G | 0.5 | 0.2143 | A |
| 9 | BICF2P1220081           | 41841130 | A | 0.5 | 0.2143 | T |
| 9 | BICF2P161638            | 41851387 | G | 0   | 0      | A |
| 9 | TIGRP2P126602_rs8585073 | 41870667 | A | 0   | 0      | G |
| 9 | BICF2P788458            | 41872475 | 0 | 0   | 0      | G |
| 9 | BICF2P802073            | 41885908 | C | 0.5 | 0.2143 | A |
| 9 | BICF2P194893            | 41890478 | A | 0   | 0      | C |
| 9 | BICF2S23250176          | 41913693 | A | 0   | 0      | G |
| 9 | BICF2G630838330         | 41918483 | A | 0.5 | 0.2143 | C |
| 9 | BICF2P644961            | 41927310 | A | 0   | 0      | G |
| 9 | BICF2G630838360         | 41932585 | 0 | 0   | 0      | G |
| 9 | BICF2P576730            | 41942181 | G | 0.5 | 0.7857 | A |
| 9 | BICF2P1361877           | 41957487 | 0 | 0   | 0      | A |
| 9 | BICF2S23553192          | 41965055 | C | 0.5 | 0.7857 | A |
| 9 | BICF2G630838398         | 41987315 | G | 0   | 0      | A |
| 9 | BICF2G630838424         | 42004664 | A | 0   | 0      | G |
| 9 | BICF2P1218221           | 42011882 | A | 0   | 0      | G |
| 9 | BICF2G630838447         | 42031159 | A | 0   | 0      | G |
| 9 | BICF2G630838458         | 42039830 | A | 0   | 0      | G |
| 9 | BICF2G630838470         | 42053169 | A | 0.5 | 0.2143 | G |
| 9 | BICF2P1274731           | 42076217 | G | 1   | 1      | A |
| 9 | BICF2S2374017           | 42094763 | G | 0.5 | 0.7857 | A |
| 9 | BICF2G630838546         | 42107642 | C | 0.5 | 0.2143 | G |
| 9 | BICF2G630838556         | 42118031 | G | 0.5 | 0.2143 | A |
| 9 | BICF2G630838576         | 42130151 | G | 0.5 | 0.2143 | A |
| 9 | BICF2G630838603         | 42148194 | A | 0.5 | 0.2143 | G |
| 9 | BICF2P1194769           | 42160470 | A | 0.5 | 0.2143 | G |
| 9 | BICF2P579744            | 42166652 | G | 0.5 | 0.7857 | A |
| 9 | BICF2P373213            | 42187768 | G | 0   | 0      | A |
| 9 | TIGRP2P126693_rs8537022 | 42211427 | A | 0   | 0      | G |
| 9 | BICF2P1186247           | 42218794 | A | 0   | 0      | C |
| 9 | BICF2G630838622         | 42229332 | G | 0   | 0      | A |
| 9 | BICF2G630838658         | 42252678 | G | 0   | 0      | A |
| 9 | BICF2G630838676         | 42265776 | G | 1   | 1      | A |
| 9 | BICF2G630838689         | 42277182 | C | 0.5 | 0.2143 | A |
| 9 | BICF2S2335873           | 42295276 | A | 0.5 | 0.7857 | G |
| 9 | BICF2P693363            | 42301086 | A | 0.5 | 0.5    | G |

|   |                         |          |   |     |        |   |
|---|-------------------------|----------|---|-----|--------|---|
| 9 | BICF2S2376764           | 42310355 | 0 | 0   | 0      | G |
| 9 | BICF2G630838716         | 42342951 | G | 0.5 | 0.7857 | A |
| 9 | BICF2G630838718         | 42345640 | A | 0   | 0      | T |
| 9 | BICF2G630838781         | 42369429 | A | 0   | 0      | G |
| 9 | TIGRP2P126728_rs8702024 | 42380843 | A | 1   | 1      | C |
| 9 | BICF2G630838830         | 42402742 | G | 0   | 0      | A |
| 9 | BICF2S23260613          | 42412870 | A | 0   | 0      | G |
| 9 | TIGRP2P126746_rs8710412 | 42427986 | A | 0.5 | 0.2143 | G |
| 9 | BICF2G630838835         | 42444227 | G | 0.5 | 0.2143 | A |
| 9 | BICF2G630838837         | 42446534 | A | 0.5 | 0.2143 | C |
| 9 | BICF2G630838852         | 42469107 | A | 0.5 | 0.7857 | G |
| 9 | BICF2P517968            | 42476490 | A | 0   | 0      | T |
| 9 | BICF2P517964            | 42477901 | A | 1   | 1      | G |
| 9 | BICF2P870540            | 42484272 | G | 0   | 0      | A |
| 9 | BICF2G630838863         | 42501399 | G | 0.5 | 0.7857 | A |
| 9 | BICF2G630838882         | 42512838 | G | 0.5 | 0.7857 | A |
| 9 | BICF2G630838901         | 42522779 | A | 0.5 | 0.7857 | G |
| 9 | BICF2G630838912         | 42531518 | G | 0.5 | 0.2143 | C |
| 9 | BICF2G630838941         | 42538927 | G | 0.5 | 0.7857 | A |
| 9 | BICF2G630838984         | 42550682 | A | 0   | 0      | G |
| 9 | BICF2P180074            | 42568517 | C | 0   | 0      | A |
| 9 | BICF2G630839031         | 42573347 | A | 0   | 0      | G |
| 9 | BICF2G630839100         | 42606201 | C | 0   | 0      | A |
| 9 | BICF2P1252022           | 42606957 | A | 1   | 1      | G |
| 9 | BICF2G630839105         | 42608157 | A | 1   | 1      | G |
| 9 | BICF2G630839159         | 42639862 | G | 0   | 0      | C |
| 9 | BICF2G630839194         | 42658261 | G | 0.5 | 0.2857 | A |
| 9 | BICF2G630839218         | 42671140 | A | 0.5 | 0.7143 | G |
| 9 | BICF2G630839219         | 42671512 | A | 0.5 | 0.7143 | G |
| 9 | BICF2G630839226         | 42676805 | C | 0   | 0      | A |
| 9 | BICF2P794852            | 42688735 | G | 0   | 0      | C |
| 9 | BICF2P1075352           | 42707716 | G | 0.5 | 0.7143 | A |
| 9 | BICF2P1257658           | 42716246 | T | 0   | 0      | A |
| 9 | BICF2G630839251         | 42737473 | C | 0   | 0      | A |
| 9 | BICF2G630839274         | 42741516 | A | 0   | 0      | G |
| 9 | BICF2G630839327         | 42758623 | A | 0   | 0      | G |
| 9 | TIGRP2P126829_rs9107732 | 42770944 | A | 0.5 | 0.2857 | G |
| 9 | BICF2G630839352         | 42784190 | G | 0   | 0      | A |
| 9 | BICF2G630839389         | 42812218 | A | 0   | 0      | G |
| 9 | BICF2G630839433         | 42840299 | A | 0   | 0      | G |
| 9 | BICF2G630839452         | 42851521 | C | 1   | 1      | G |
| 9 | TIGRP2P126867_rs8989669 | 42861624 | 0 | 0   | 0      | C |
| 9 | BICF2P15624             | 42873333 | A | 0.5 | 0.7143 | G |
| 9 | BICF2G630839516         | 42903201 | A | 0.5 | 0.7143 | G |
| 9 | BICF2G630839542         | 42916473 | C | 0.5 | 0.2857 | A |
| 9 | TIGRP2P126881_rs9017672 | 42927780 | A | 0   | 0      | G |
| 9 | BICF2G630839571         | 42929679 | A | 0.5 | 0.7143 | G |

|   |                         |          |   |     |        |   |
|---|-------------------------|----------|---|-----|--------|---|
| 9 | BICF2G630839587         | 42937781 | C | 0   | 0      | A |
| 9 | BICF2P265497            | 42949506 | A | 0.5 | 0.2857 | G |
| 9 | BICF2G630839639         | 42960027 | A | 0.5 | 0.7143 | C |
| 9 | BICF2G630839652         | 42964929 | A | 0.5 | 0.7143 | G |
| 9 | TIGRP2P126909_rs9031587 | 42996586 | A | 0.5 | 0.2857 | G |
| 9 | BICF2G630839689         | 43020797 | A | 0   | 0      | G |
| 9 | BICF2G630839707         | 43027145 | A | 0   | 0      | G |
| 9 | BICF2G630839723         | 43036108 | G | 0   | 0      | A |
| 9 | BICF2G630839742         | 43054820 | A | 0.5 | 0.7143 | G |
| 9 | BICF2G630839753         | 43062456 | A | 0.5 | 0.7143 | G |
| 9 | BICF2P900122            | 43072411 | G | 0   | 0      | A |
| 9 | BICF2G630839764         | 43072729 | A | 0   | 0      | C |
| 9 | BICF2P450914            | 43077556 | A | 0   | 0      | G |
| 9 | BICF2P1207780           | 43083141 | A | 0   | 0      | G |
| 9 | BICF2P797094            | 43090781 | A | 0   | 0      | G |
| 9 | BICF2G630839818         | 43111058 | G | 0   | 0      | A |
| 9 | BICF2P554982            | 43133661 | G | 0.5 | 0.7143 | C |
| 9 | BICF2G630839841         | 43141432 | G | 0   | 0      | C |
| 9 | BICF2G630839844         | 43151320 | A | 0   | 0      | G |
| 9 | BICF2G630839863         | 43166376 | A | 0   | 0      | G |
| 9 | BICF2G630839892         | 43184511 | C | 0   | 0      | A |
| 9 | BICF2G630839897         | 43189706 | G | 0.5 | 0.2857 | A |
| 9 | BICF2G630839902         | 43196615 | C | 0.5 | 0.7143 | A |
| 9 | BICF2G630839920         | 43207224 | A | 0.5 | 0.2857 | G |
| 9 | TIGRP2P126938_rs8783164 | 43255503 | A | 0.5 | 0.2857 | G |
| 9 | BICF2G630839950         | 43266995 | A | 0   | 0      | G |
| 9 | BICF2G630839964         | 43278584 | A | 0.5 | 0.7143 | G |
| 9 | BICF2G630839972         | 43289065 | A | 0.5 | 0.7143 | C |
| 9 | BICF2P252311            | 43292661 | A | 0   | 0      | G |
| 9 | BICF2S23060746          | 43295035 | A | 0   | 0      | G |
| 9 | BICF2S23741495          | 43303864 | A | 0.5 | 0.7143 | G |
| 9 | BICF2P224662            | 43307672 | A | 0   | 0      | G |
| 9 | BICF2P1339649           | 43340433 | G | 1   | 1      | A |
| 9 | BICF2P689336            | 43346763 | A | 0   | 0      | G |
| 9 | BICF2S2356413           | 43364529 | C | 0   | 0      | A |
| 9 | BICF2P435886            | 43374747 | A | 0.5 | 0.2857 | G |
| 9 | BICF2P414872            | 43381514 | A | 0.5 | 0.7143 | G |
| 9 | BICF2P191033            | 43408253 | A | 0   | 0      | G |
| 9 | BICF2P1216677           | 43417587 | G | 0   | 0      | A |
| 9 | TIGRP2P126995_rs8509709 | 43428999 | C | 0   | 0      | G |
| 9 | TIGRP2P126998_rs8677925 | 43441714 | G | 0   | 0      | A |
| 9 | TIGRP2P127000_rs8714608 | 43457106 | C | 0.5 | 0.2857 | A |
| 9 | BICF2P1129853           | 43459007 | G | 0.5 | 0.2857 | A |
| 9 | TIGRP2P127005_rs8880175 | 43473727 | 0 | 0   | 0      | C |
| 9 | BICF2P242958            | 43484020 | G | 0   | 0      | A |
| 9 | TIGRP2P127016_rs9016932 | 43494535 | G | 0   | 0      | A |
| 9 | BICF2P161883            | 43513695 | A | 0.5 | 0.2857 | G |

|   |                         |          |   |     |        |   |
|---|-------------------------|----------|---|-----|--------|---|
| 9 | TIGRP2P127027_rs8669574 | 43516731 | A | 0   | 0      | G |
| 9 | BICF2P756102            | 43544947 | G | 0   | 0      | A |
| 9 | BICF2P37943             | 43546689 | A | 0   | 0      | G |
| 9 | BICF2G630839994         | 43558215 | C | 0.5 | 0.2857 | A |
| 9 | BICF2G630839997         | 43560192 | A | 0.5 | 0.25   | G |
| 9 | BICF2G630840002         | 43564331 | G | 0.5 | 0.2857 | A |
| 9 | BICF2P698732            | 43576885 | G | 0   | 0      | A |
| 9 | TIGRP2P127058_rs9151421 | 43592567 | 0 | 0   | 0      | A |
| 9 | BICF2G630840007         | 43597173 | A | 0   | 0      | C |
| 9 | TIGRP2P127065_rs8948429 | 43611224 | 0 | 0   | 0      | G |
| 9 | TIGRP2P127079_rs8900577 | 43627716 | 0 | 0   | 0      | G |
| 9 | TIGRP2P127088_rs9109497 | 43635732 | A | 0.5 | 0.7143 | C |
| 9 | BICF2P693064            | 43643712 | A | 0   | 0      | G |
| 9 | BICF2S23120296          | 43673656 | T | 0.5 | 0.7143 | A |
| 9 | BICF2P1366169           | 43678284 | A | 0   | 0      | G |
| 9 | BICF2P1450497           | 43710073 | G | 0   | 0      | A |
| 9 | BICF2P84212             | 43715415 | G | 0.5 | 0.7143 | A |
| 9 | TIGRP2P127123_rs9019934 | 43732465 | A | 0   | 0      | G |
| 9 | TIGRP2P127126_rs8869602 | 43735960 | A | 0.5 | 0.7143 | G |
| 9 | BICF2G630840017         | 43752988 | A | 0.5 | 0.7143 | C |
| 9 | TIGRP2P127128_rs8521929 | 43759163 | G | 0   | 0      | A |
| 9 | BICF2G630840029         | 43772831 | A | 0.5 | 0.7143 | G |
| 9 | BICF2G630840034         | 43783501 | A | 0.5 | 0.7143 | C |
| 9 | BICF2G630840040         | 43794598 | A | 0.5 | 0.7143 | G |
| 9 | BICF2G630840052         | 43804743 | G | 0   | 0      | A |
| 9 | BICF2G630840078         | 43819094 | A | 0.5 | 0.2857 | G |
| 9 | BICF2G630840081         | 43826500 | G | 0.5 | 0.2857 | A |
| 9 | TIGRP2P127134_rs9030883 | 43838072 | G | 0.5 | 0.2857 | A |
| 9 | BICF2S23613504          | 43887050 | A | 0   | 0      | C |
| 9 | BICF2S2451720           | 43898593 | A | 0   | 0      | G |
| 9 | BICF2P1366777           | 43936492 | G | 0   | 0      | A |
| 9 | BICF2P1317284           | 43940252 | G | 0   | 0      | A |
| 9 | TIGRP2P127139_rs8597996 | 43944769 | A | 0   | 0      | G |
| 9 | BICF2G630840113         | 43953421 | G | 0.5 | 0.2857 | A |
| 9 | BICF2G630840139         | 43986408 | G | 0   | 0      | A |
| 9 | BICF2G630840151         | 43991642 | A | 0   | 0      | G |
| 9 | BICF2G630840176         | 44006311 | A | 0.5 | 0.7143 | G |
| 9 | BICF2G630840185         | 44011151 | G | 0.5 | 0.7143 | A |
| 9 | BICF2G630840198         | 44022639 | A | 0.5 | 0.7143 | G |
| 9 | BICF2G630840234         | 44040392 | G | 0.5 | 0.2857 | A |
| 9 | BICF2G630840237         | 44045206 | C | 0.5 | 0.2857 | A |
| 9 | BICF2G630840256         | 44059580 | C | 0.5 | 0.7143 | A |
| 9 | BICF2P913662            | 44071845 | 0 | 0   | 0      | A |
| 9 | BICF2G630840282         | 44089313 | A | 0.5 | 0.2857 | G |
| 9 | TIGRP2P127178_rs8909269 | 44107754 | C | 0.5 | 0.5    | A |
| 9 | BICF2G630840297         | 44130900 | A | 0.5 | 0.7143 | G |
| 9 | BICF2G630840325         | 44149022 | A | 0.5 | 0.7143 | G |



|   |                         |          |   |     |        |   |
|---|-------------------------|----------|---|-----|--------|---|
| 9 | BICF2G630840334         | 44164362 | A | 1   | 1      | G |
| 9 | BICF2P569184            | 44186576 | A | 0   | 0      | G |
| 9 | BICF2P325054            | 44203449 | G | 1   | 1      | A |
| 9 | TIGRP2P127195_rs9055793 | 44211454 | 0 | 0   | 0      | G |
| 9 | BICF2G630840349         | 44238305 | G | 0.5 | 0.2857 | A |
| 9 | TIGRP2P127198_rs9030833 | 44241217 | G | 0   | 0      | A |
| 9 | BICF2P1426690           | 44246638 | G | 0.5 | 0.2857 | A |
| 9 | BICF2S23217             | 44256095 | C | 0   | 0      | A |
| 9 | BICF2P545967            | 44266639 | 0 | 0   | 0      | A |
| 9 | BICF2G630840370         | 44289750 | C | 0   | 0      | A |
| 9 | BICF2G630840379         | 44308968 | A | 0   | 0      | G |
| 9 | BICF2G630840389         | 44314279 | G | 0.5 | 0.7143 | A |
| 9 | BICF2P240339            | 44340131 | 0 | 0   | 0      | A |
| 9 | BICF2P660166            | 44344699 | A | 0.5 | 0.7143 | G |
| 9 | BICF2G630840398         | 44362686 | C | 0.5 | 0.2857 | A |
| 9 | BICF2G630840400         | 44378118 | A | 0.5 | 0.2857 | G |
| 9 | BICF2G630840405         | 44384643 | G | 1   | 1      | A |
| 9 | BICF2G630840429         | 44397880 | A | 1   | 1      | C |
| 9 | BICF2G630840438         | 44405219 | A | 0   | 0      | G |
| 9 | BICF2G630840450         | 44422298 | C | 0.5 | 0.7143 | G |
| 9 | BICF2P915961            | 44435808 | A | 0   | 0      | G |
| 9 | TIGRP2P127247_rs8785481 | 44443750 | G | 0   | 0      | A |
| 9 | BICF2G630840468         | 44447589 | A | 1   | 1      | C |
| 9 | BICF2G630840492         | 44477569 | A | 0.5 | 0.7143 | G |
| 9 | BICF2G630840514         | 44489698 | G | 0.5 | 0.2857 | A |
| 9 | BICF2G630840515         | 44489841 | G | 0.5 | 0.2857 | C |
| 9 | TIGRP2P127266_rs8654074 | 44499447 | A | 0   | 0      | G |
| 9 | BICF2G630840534         | 44505568 | A | 1   | 1      | G |
| 9 | BICF2G630840550         | 44522489 | A | 0.5 | 0.2857 | G |
| 9 | BICF2G630840572         | 44547106 | G | 1   | 1      | A |
| 9 | BICF2G630840588         | 44561185 | G | 1   | 1      | C |
| 9 | BICF2G630840604         | 44568073 | C | 0.5 | 0.2857 | A |
| 9 | BICF2G630840618         | 44584498 | G | 1   | 1      | A |
| 9 | BICF2G630840621         | 44587699 | A | 0.5 | 0.2857 | G |
| 9 | BICF2G630840640         | 44607475 | G | 0.5 | 0.2857 | A |
| 9 | BICF2P1371664           | 44611697 | A | 0.5 | 0.2857 | G |
| 9 | BICF2G630840645         | 44622583 | G | 1   | 1      | A |
| 9 | BICF2P1224292           | 44631774 | G | 0   | 0      | A |
| 9 | BICF2S23255440          | 44647395 | A | 0   | 0      | G |
| 9 | BICF2P1049044           | 44666177 | A | 0.5 | 0.7143 | G |
| 9 | BICF2G630840701         | 44666435 | G | 0.5 | 0.7143 | A |
| 9 | BICF2G630840711         | 44685451 | A | 0   | 0      | G |
| 9 | BICF2G630840728         | 44698268 | G | 0   | 0      | A |
| 9 | BICF2G630840734         | 44701573 | A | 0   | 0      | G |
| 9 | BICF2P1445775           | 44720207 | A | 1   | 1      | G |
| 9 | TIGRP2P127321_rs8507343 | 44720833 | C | 1   | 1      | G |
| 9 | BICF2P927393            | 44734215 | G | 0.5 | 0.2857 | A |

|   |                         |          |   |     |        |   |
|---|-------------------------|----------|---|-----|--------|---|
| 9 | BICF2G630840760         | 44739749 | G | 0.5 | 0.2857 | A |
| 9 | BICF2P946787            | 44747565 | G | 0.5 | 0.2857 | A |
| 9 | BICF2P855555            | 44759247 | G | 0   | 0      | A |
| 9 | BICF2G630840809         | 44773025 | G | 0   | 0      | C |
| 9 | TIGRP2P127362_rs8936418 | 44782966 | 0 | 0   | 0      | G |
| 9 | BICF2G630840822         | 44785341 | G | 0.5 | 0.2857 | A |
| 9 | BICF2G630840832         | 44793043 | A | 0   | 0      | G |
| 9 | BICF2G630840846         | 44807889 | A | 0.5 | 0.2857 | G |
| 9 | BICF2G630840851         | 44816438 | A | 0   | 0      | G |
| 9 | BICF2P692691            | 44829043 | T | 0.5 | 0.2857 | A |
| 9 | BICF2G630840881         | 44841179 | G | 0   | 0      | A |
| 9 | BICF2P1282751           | 44851038 | 0 | 0   | 0      | A |
| 9 | TIGRP2P127382_rs8963208 | 44862366 | 0 | 0   | 0      | G |
| 9 | BICF2G630840915         | 44874898 | G | 0   | 0      | A |
| 9 | BICF2G630840932         | 44891878 | G | 0.5 | 0.2857 | A |
| 9 | TIGRP2P127394_rs8839957 | 44896274 | A | 0.5 | 0.2857 | G |
| 9 | BICF2G630840939         | 44900430 | A | 0   | 0      | G |
| 9 | BICF2G630840944         | 44912888 | G | 0   | 0      | A |
| 9 | BICF2G630840947         | 44927746 | A | 0   | 0      | G |
| 9 | BICF2G630840956         | 44942663 | A | 0.5 | 0.2857 | C |
| 9 | BICF2G630840985         | 44962528 | G | 0   | 0      | A |
| 9 | BICF2G630840988         | 44969122 | A | 0   | 0      | G |
| 9 | BICF2G630840996         | 44983516 | C | 0   | 0      | A |
| 9 | TIGRP2P127404_rs9161802 | 44993994 | 0 | 0   | 0      | G |
| 9 | BICF2G630841000         | 45006901 | G | 0.5 | 0.25   | A |
| 9 | BICF2G630841011         | 45021034 | C | 0   | 0      | A |
| 9 | BICF2G630841013         | 45023238 | G | 0   | 0      | A |
| 9 | BICF2P414366            | 45043483 | G | 0   | 0      | A |
| 9 | BICF2G630841038         | 45054204 | G | 0   | 0      | A |
| 9 | BICF2G630841040         | 45057992 | G | 0.5 | 0.2857 | A |
| 9 | BICF2G630841053         | 45091259 | G | 0.5 | 0.2857 | A |
| 9 | BICF2P1229877           | 45095707 | G | 0   | 0      | C |
| 9 | BICF2G630841063         | 45102924 | A | 0.5 | 0.2857 | G |
| 9 | BICF2G630841070         | 45111938 | A | 1   | 1      | G |
| 9 | BICF2P825921            | 45134306 | 0 | 0   | 0      | G |
| 9 | BICF2P737374            | 45148023 | G | 0   | 0      | A |
| 9 | TIGRP2P127418_rs9034938 | 45161899 | A | 0   | 0      | G |
| 9 | TIGRP2P127420_rs8784160 | 45173685 | G | 0   | 0      | A |
| 9 | TIGRP2P127429_rs8810777 | 45188905 | A | 0.5 | 0.7143 | G |
| 9 | BICF2P624756            | 45197605 | A | 0   | 0      | G |
| 9 | BICF2G630841105         | 45208941 | G | 0.5 | 0.7143 | A |
| 9 | BICF2G630841127         | 45223896 | A | 0.5 | 0.2857 | C |
| 9 | BICF2P1137227           | 45231825 | 0 | 0   | 0      | G |
| 9 | BICF2P120779            | 45245750 | G | 0   | 0      | A |
| 9 | BICF2P600834            | 45260720 | A | 0   | 0      | G |
| 9 | BICF2G630841155         | 45264691 | G | 0.5 | 0.7143 | C |
| 9 | BICF2P1187317           | 45276074 | A | 0   | 0      | G |

|   |                         |          |   |     |        |   |
|---|-------------------------|----------|---|-----|--------|---|
| 9 | TIGRP2P127469_rs9121610 | 45310669 | A | 0.5 | 0.7143 | G |
| 9 | BICF2S22923141          | 45324913 | G | 0.5 | 0.2857 | A |
| 9 | BICF2P380718            | 45336781 | A | 0.5 | 0.2857 | G |
| 9 | BICF2P65976             | 45344102 | A | 0.5 | 0.2857 | T |
| 9 | BICF2P65972             | 45345282 | A | 0   | 0      | G |
| 9 | BICF2S23019540          | 45365293 | A | 0   | 0      | G |
| 9 | BICF2P733656            | 45368550 | G | 0   | 0      | A |
| 9 | TIGRP2P127490_rs9071362 | 45376390 | G | 1   | 1      | A |
| 9 | BICF2P13707             | 45383599 | G | 0.5 | 0.2857 | A |
| 9 | BICF2P94165             | 45384687 | A | 0   | 0      | G |
| 9 | TIGRP2P127497_rs8831775 | 45390632 | A | 0   | 0      | G |
| 9 | BICF2P725474            | 45402585 | A | 0.5 | 0.2857 | G |
| 9 | BICF2P862310            | 45424747 | A | 1   | 1      | G |
| 9 | BICF2S22946090          | 45425505 | A | 0   | 0      | G |
| 9 | TIGRP2P127515_rs8712849 | 45441235 | A | 0   | 0      | C |
| 9 | BICF2S23442356          | 45451780 | G | 0.5 | 0.7143 | C |
| 9 | TIGRP2P127519_rs9211495 | 45461737 | A | 0.5 | 0.2857 | G |
| 9 | BICF2P342940            | 45479647 | A | 0.5 | 0.7143 | G |
| 9 | BICF2P665540            | 45491057 | T | 0   | 0      | A |
| 9 | BICF2P1124202           | 45496884 | G | 0.5 | 0.7143 | A |
| 9 | TIGRP2P127531_rs9039390 | 45505720 | 0 | 0   | 0      | G |
| 9 | BICF2S22930410          | 45520019 | G | 0.5 | 0.2857 | A |
| 9 | BICF2S23536916          | 45533037 | A | 0   | 0      | G |
| 9 | BICF2S22925902          | 45544335 | A | 1   | 1      | C |
| 9 | BICF2P894953            | 45554038 | A | 0   | 0      | G |
| 9 | BICF2S23719309          | 45574296 | C | 0   | 0      | A |
| 9 | BICF2P1106907           | 45591744 | G | 0   | 0      | A |
| 9 | BICF2P137419            | 45613861 | A | 0.5 | 0.7143 | G |
| 9 | BICF2P469265            | 45623036 | G | 0.5 | 0.2857 | A |
| 9 | BICF2P844816            | 45651555 | A | 0.5 | 0.2857 | G |
| 9 | BICF2S23424205          | 45668492 | G | 0   | 0      | A |
| 9 | TIGRP2P127602_rs8884419 | 45706499 | G | 0   | 0      | A |
| 9 | BICF2S23410227          | 45713167 | A | 0   | 0      | G |
| 9 | BICF2P334155            | 45730167 | G | 0.5 | 0.7143 | A |
| 9 | BICF2P49040             | 45739536 | A | 0.5 | 0.7143 | G |
| 9 | BICF2P767195            | 45748369 | G | 0.5 | 0.7143 | A |
| 9 | BICF2P721433            | 45759088 | A | 0.5 | 0.7143 | C |
| 9 | BICF2P593523            | 45778021 | A | 0.5 | 0.7143 | G |
| 9 | BICF2P72804             | 45792953 | G | 0.5 | 0.7143 | A |
| 9 | BICF2S23148443          | 45818032 | G | 0   | 0      | A |
| 9 | BICF2P1141278           | 45838153 | A | 0.5 | 0.7143 | G |
| 9 | BICF2P965484            | 45852556 | A | 0.5 | 0.2857 | G |
| 9 | BICF2P1253185           | 45883160 | A | 0   | 0      | G |
| 9 | TIGRP2P127666_rs8637233 | 45895323 | A | 0   | 0      | G |
| 9 | BICF2P1230497           | 45901455 | A | 0.5 | 0.5    | G |
| 9 | BICF2S23143335          | 45904552 | T | 0.5 | 0.2857 | A |
| 9 | BICF2P647646            | 45919418 | G | 0.5 | 0.7143 | A |

|   |                         |          |   |     |        |   |
|---|-------------------------|----------|---|-----|--------|---|
| 9 | BICF2P321869            | 45922456 | G | 0.5 | 0.7143 | C |
| 9 | BICF2P617533            | 45925051 | G | 0.5 | 0.7143 | A |
| 9 | BICF2P380084            | 45931936 | A | 0   | 0      | G |
| 9 | BICF2S23115519          | 45949273 | A | 0   | 0      | G |
| 9 | BICF2P355682            | 45961936 | G | 0   | 0      | A |
| 9 | BICF2P978567            | 45971110 | G | 0   | 0      | A |
| 9 | BICF2P964767            | 46011581 | A | 0   | 0.2143 | G |
| 9 | BICF2S23450909          | 46032307 | G | 0   | 0      | A |
| 9 | TIGRP2P127744_rs9023558 | 46036398 | G | 1   | 0.7857 | A |
| 9 | BICF2P814146            | 46055233 | A | 0   | 0      | G |
| 9 | TIGRP2P127780_rs8888636 | 46057128 | G | 1   | 0.7857 | A |
| 9 | BICF2P590225            | 46067638 | G | 0   | 0.2143 | A |
| 9 | BICF2P590229            | 46068119 | A | 0   | 0.2143 | G |
| 9 | BICF2P612988            | 46072993 | A | 0   | 0.2143 | C |
| 9 | BICF2P33514             | 46100559 | A | 0   | 0      | G |
| 9 | BICF2S23741213          | 46129353 | G | 0   | 0.2143 | A |
| 9 | BICF2P1375165           | 46139608 | 0 | 0   | 0      | G |
| 9 | TIGRP2P127791_rs8547059 | 46172387 | A | 1   | 0.7857 | G |
| 9 | BICF2P139278            | 46174723 | G | 0   | 0      | A |
| 9 | TIGRP2P127797_rs8576695 | 46186132 | 0 | 0   | 0      | G |
| 9 | TIGRP2P127798_rs9044431 | 46207594 | A | 0   | 0      | G |
| 9 | BICF2S2396711           | 46220789 | 0 | 0   | 0      | T |
| 9 | BICF2P550349            | 46239022 | T | 1   | 0.7857 | A |
| 9 | BICF2P18846             | 46249001 | 0 | 0   | 0      | C |
| 9 | TIGRP2P127807_rs8558394 | 46281528 | 0 | 0   | 0      | C |
| 9 | BICF2P188476            | 46289798 | 0 | 0   | 0      | C |
| 9 | BICF2P180563            | 46332742 | A | 0   | 0      | G |
| 9 | BICF2S23334035          | 46343464 | A | 1   | 0.7857 | T |
| 9 | BICF2P802688            | 46352551 | A | 0   | 0      | G |
| 9 | BICF2S23316986          | 46378997 | A | 1   | 1      | G |
| 9 | BICF2S2339560           | 46381784 | G | 1   | 1      | A |
| 9 | BICF2P1176231           | 46413781 | 0 | 0   | 0      | C |
| 9 | BICF2S23153684          | 46419991 | A | 0   | 0      | C |
| 9 | BICF2S23130171          | 46429175 | A | 0   | 0      | G |
| 9 | TIGRP2P127819_rs8782478 | 46444973 | G | 0   | 0      | A |
| 9 | TIGRP2P127820_rs8782477 | 46446923 | A | 0   | 0      | C |
| 9 | TIGRP2P127822_rs9179880 | 46451952 | 0 | 0   | 0      | C |
| 9 | BICF2P579086            | 46465548 | A | 0   | 0      | G |
| 9 | BICF2P1056746           | 46481284 | A | 0   | 0      | G |
| 9 | BICF2P368699            | 46487181 | C | 0   | 0      | A |
| 9 | BICF2S2337002           | 46498504 | G | 0   | 0      | A |
| 9 | BICF2P157199            | 46516033 | G | 0   | 0      | A |
| 9 | BICF2P153680            | 46525644 | G | 0   | 0      | A |
| 9 | BICF2P1110461           | 46531115 | A | 0   | 0      | G |
| 9 | BICF2P1383032           | 46551817 | A | 0   | 0      | G |
| 9 | TIGRP2P127863_rs8684086 | 46560126 | A | 0   | 0      | G |
| 9 | BICF2P890521            | 46566090 | C | 0   | 0      | A |

|   |                         |          |   |   |        |   |
|---|-------------------------|----------|---|---|--------|---|
| 9 | BICF2P1312330           | 46587357 | G | 0 | 0      | A |
| 9 | BICF2P967928            | 46600714 | 0 | 0 | 0      | G |
| 9 | BICF2S23053902          | 46615925 | C | 0 | 0      | A |
| 9 | TIGRP2P127871_rs9039784 | 46630795 | A | 0 | 0      | G |
| 9 | BICF2P62126             | 46637389 | A | 0 | 0      | G |
| 9 | BICF2P505380            | 46644882 | G | 0 | 0      | A |
| 9 | BICF2P456138            | 46655758 | A | 0 | 0      | G |
| 9 | BICF2P36016             | 46673812 | G | 0 | 0      | A |
| 9 | BICF2P864768            | 46699066 | A | 1 | 1      | C |
| 9 | TIGRP2P127900_rs9139238 | 46701646 | A | 0 | 0.2143 | C |
| 9 | BICF2P697377            | 46727894 | A | 1 | 0.7857 | G |
| 9 | BICF2P128507            | 46749952 | 0 | 0 | 0      | C |
| 9 | TIGRP2P127909_rs8789645 | 46804560 | A | 0 | 0.2143 | G |
| 9 | BICF2G630841159         | 46814845 | 0 | 0 | 0      | A |
| 9 | BICF2P31211             | 46829263 | G | 0 | 0      | A |
| 9 | TIGRP2P127922_rs8723155 | 46881147 | G | 0 | 0      | A |
| 9 | BICF2P504721            | 46889704 | 0 | 0 | 0      | T |
| 9 | BICF2P1340419           | 46932981 | C | 0 | 0.2143 | A |
| 9 | BICF2P1359703           | 46943938 | A | 0 | 0      | G |
| 9 | BICF2P1302170           | 46962268 | A | 0 | 0.2143 | G |
| 9 | BICF2P325180            | 46966619 | G | 0 | 0.2143 | A |
| 9 | BICF2P541408            | 46978538 | C | 0 | 0      | A |
| 9 | BICF2P622818            | 46990511 | A | 0 | 0.2143 | G |
| 9 | BICF2P130367            | 47001398 | 0 | 0 | 0      | G |
| 9 | BICF2P1036331           | 47044682 | A | 0 | 0      | G |
| 9 | BICF2S23536976          | 47049676 | G | 1 | 0.7857 | A |
| 9 | BICF2S23018060          | 47058675 | A | 1 | 0.7857 | G |
| 9 | BICF2P475938            | 47093659 | G | 0 | 0      | A |
| 9 | BICF2P1125476           | 47109843 | G | 0 | 0      | A |
| 9 | BICF2P197688            | 47124904 | 0 | 0 | 0      | A |
| 9 | BICF2S23632135          | 47132755 | 0 | 0 | 0      | A |
| 9 | BICF2P1093646           | 47143151 | C | 0 | 0.2143 | A |
| 9 | TIGRP2P127956_rs8637929 | 47170815 | G | 0 | 0.2143 | A |
| 9 | BICF2P360616            | 47175135 | 0 | 0 | 0      | A |
| 9 | BICF2P1142549           | 47192696 | 0 | 0 | 0      | G |
| 9 | BICF2P44507             | 47204223 | C | 0 | 0      | A |
| 9 | BICF2P718061            | 47209434 | A | 0 | 0      | G |
| 9 | TIGRP2P127964_rs8536728 | 47225913 | G | 0 | 0.2143 | A |
| 9 | BICF2P674759            | 47244696 | G | 0 | 0      | A |
| 9 | BICF2P1311630           | 47260776 | A | 0 | 0.2143 | G |
| 9 | BICF2P989960            | 47266914 | A | 0 | 0.2143 | G |
| 9 | TIGRP2P127978_rs8968034 | 47286743 | G | 0 | 0.2143 | A |
| 9 | BICF2P1079200           | 47290004 | G | 0 | 0.2143 | A |
| 9 | BICF2P895346            | 47315276 | G | 0 | 0.2143 | A |
| 9 | BICF2P142242            | 47343037 | A | 0 | 0.1667 | G |
| 9 | BICF2P587823            | 47353825 | T | 0 | 0.1    | A |
| 9 | BICF2P266094            | 47357182 | G | 0 | 0      | A |

|   |                         |          |   |   |        |   |
|---|-------------------------|----------|---|---|--------|---|
| 9 | BICF2P902495            | 47369293 | G | 0 | 0.2143 | A |
| 9 | BICF2P19842             | 47381991 | A | 0 | 0.1667 | C |
| 9 | BICF2S23519513          | 47394623 | 0 | 0 | 0      | A |
| 9 | BICF2P509129            | 47429947 | A | 0 | 0.1667 | G |
| 9 | BICF2P1249988           | 47445878 | C | 0 | 0.2143 | A |
| 9 | BICF2P676084            | 47460046 | G | 0 | 0.2143 | A |
| 9 | BICF2P1302650           | 47469883 | G | 0 | 0.1667 | A |
| 9 | BICF2P120798            | 47497048 | 0 | 0 | 0      | G |
| 9 | BICF2S2356641           | 47540847 | A | 1 | 1      | G |
| 9 | BICF2P340934            | 47542348 | G | 1 | 1      | A |
| 9 | BICF2P614584            | 47560435 | A | 1 | 1      | C |
| 9 | BICF2P1308700           | 47565182 | 0 | 0 | 0      | A |
| 9 | TIGRP2P128006_rs8319569 | 47582781 | G | 0 | 0.2143 | A |
| 9 | BICF2P1468871           | 47589418 | G | 1 | 0.7857 | A |
| 9 | TIGRP2P128013_rs8567281 | 47600720 | G | 1 | 0.7857 | A |
| 9 | BICF2P228007            | 47620443 | G | 1 | 0.7857 | A |
| 9 | BICF2P1201382           | 47624597 | A | 1 | 0.7857 | G |
| 9 | BICF2P1229648           | 47639442 | C | 1 | 0.7857 | A |
| 9 | BICF2P228029            | 47647011 | A | 1 | 0.7857 | G |
| 9 | BICF2P341331            | 47659782 | A | 1 | 0.7857 | C |
| 9 | BICF2P1402053           | 47668055 | 0 | 0 | 0      | C |
| 9 | BICF2P18608             | 47682618 | G | 1 | 0.7857 | A |
| 9 | BICF2S23728304          | 47694098 | G | 0 | 0.2143 | A |
| 9 | TIGRP2P128023_rs8694773 | 47702918 | A | 0 | 0      | G |
| 9 | BICF2P653362            | 47715201 | C | 0 | 0.2143 | G |
| 9 | TIGRP2P128027_rs8510124 | 47725275 | G | 0 | 0.2143 | A |
| 9 | BICF2P330608            | 47747184 | A | 0 | 0.2143 | G |
| 9 | TIGRP2P128042_rs9168995 | 47749228 | C | 0 | 0.2143 | A |
| 9 | BICF2P895948            | 47761049 | 0 | 0 | 0      | A |
| 9 | BICF2S23116825          | 47776324 | A | 0 | 0      | G |
| 9 | BICF2S23124809          | 47793546 | A | 0 | 0.2143 | G |
| 9 | BICF2P435526            | 47806347 | 0 | 0 | 0      | A |
| 9 | BICF2P1168261           | 47831552 | A | 0 | 0      | G |
| 9 | BICF2P690332            | 47859309 | A | 0 | 0      | G |
| 9 | BICF2P950384            | 47877758 | 0 | 0 | 0      | G |
| 9 | BICF2P1440373           | 47886612 | 0 | 0 | 0      | C |
| 9 | TIGRP2P128100_rs8990684 | 47906887 | 0 | 0 | 0      | A |
| 9 | TIGRP2P128102_rs8982620 | 47909735 | G | 0 | 0      | A |
| 9 | BICF2S23649207          | 47927769 | G | 0 | 0.1667 | A |
| 9 | BICF2P794828            | 47936419 | A | 1 | 1      | C |
| 9 | BICF2S23231135          | 47948899 | A | 0 | 0      | G |
| 9 | TIGRP2P128115_rs9090434 | 47958382 | G | 0 | 0.2143 | A |
| 9 | BICF2P1413286           | 47976591 | 0 | 0 | 0      | G |
| 9 | BICF2P1392974           | 47979923 | A | 0 | 0      | G |
| 9 | BICF2P926885            | 48001409 | A | 0 | 0      | G |
| 9 | BICF2P945643            | 48014174 | 0 | 0 | 0      | C |
| 9 | BICF2S2334280           | 48027810 | G | 1 | 0.7857 | A |

|   |                         |          |   |     |        |   |
|---|-------------------------|----------|---|-----|--------|---|
| 9 | BICF2P57249             | 48056026 | G | 0   | 0      | A |
| 9 | BICF2P867356            | 48060584 | A | 0   | 0      | G |
| 9 | BICF2P1002363           | 48080546 | G | 1   | 1      | A |
| 9 | BICF2S2347312           | 48086539 | A | 1   | 0.7857 | C |
| 9 | TIGRP2P128141_rs9043320 | 48093469 | G | 0   | 0.2143 | A |
| 9 | TIGRP2P128146_rs8563561 | 48109024 | A | 0   | 0      | G |
| 9 | BICF2P1249802           | 48130630 | A | 0   | 0      | G |
| 9 | BICF2S23154457          | 48133320 | A | 0   | 0      | G |
| 9 | BICF2P1292584           | 48140428 | C | 0   | 0.2143 | A |
| 9 | TIGRP2P128165_rs8958318 | 48150758 | G | 0   | 0      | A |
| 9 | TIGRP2P128178_rs9047851 | 48170387 | G | 0   | 0.2143 | A |
| 9 | BICF2P470855            | 48181555 | A | 0   | 0.2143 | G |
| 9 | BICF2P156825            | 48195161 | A | 1   | 1      | G |
| 9 | BICF2S23134023          | 48197616 | G | 1   | 1      | A |
| 9 | BICF2P264146            | 48211596 | G | 0   | 0.2143 | A |
| 9 | BICF2P644480            | 48229641 | G | 0   | 0.2143 | A |
| 9 | BICF2S22941520          | 48232263 | A | 0   | 0      | G |
| 9 | BICF2S23235526          | 48251808 | G | 1   | 0.7857 | A |
| 9 | BICF2S23141984          | 48259329 | C | 1   | 1      | A |
| 9 | BICF2P1456440           | 48276070 | G | 0   | 0.2143 | A |
| 9 | BICF2P964029            | 48287228 | G | 0   | 0      | A |
| 9 | BICF2P822569            | 48294789 | A | 0   | 0      | C |
| 9 | BICF2S23728955          | 48305105 | G | 0   | 0      | A |
| 9 | BICF2S232939            | 48316483 | A | 0   | 0      | G |
| 9 | BICF2P693938            | 48325344 | A | 0   | 0.2143 | G |
| 9 | TIGRP2P128227_rs9001072 | 48334803 | A | 0   | 0.2143 | G |
| 9 | BICF2P798834            | 48351258 | A | 0   | 0      | G |
| 9 | BICF2P577580            | 48369772 | G | 1   | 0.7857 | A |
| 9 | BICF2P244156            | 48382392 | C | 1   | 0.7857 | A |
| 9 | BICF2P1293972           | 48393204 | A | 0   | 0      | C |
| 9 | BICF2P552922            | 48411915 | A | 1   | 0.7857 | G |
| 9 | BICF2S23127077          | 48418528 | A | 1   | 0.7857 | G |
| 9 | BICF2P932247            | 48435397 | A | 0   | 0.2143 | C |
| 9 | BICF2P1328404           | 48452998 | A | 0   | 0.2143 | G |
| 9 | BICF2S22923291          | 48478119 | C | 1   | 0.7857 | A |
| 9 | BICF2P1202365           | 48493146 | A | 0   | 0.2143 | C |
| 9 | BICF2S23246952          | 48507443 | 0 | 0   | 0      | A |
| 9 | BICF2S23218329          | 48536412 | G | 1   | 0.7857 | A |
| 9 | BICF2P640660            | 48542795 | C | 0   | 0.2143 | G |
| 9 | BICF2P542053            | 48550998 | G | 0   | 0.2143 | A |
| 9 | BICF2P877447            | 48554219 | C | 0   | 0      | A |
| 9 | BICF2P474924            | 48580058 | G | 0.5 | 0.9286 | A |
| 9 | BICF2P1109444           | 48598683 | A | 0.5 | 0.9286 | G |
| 9 | BICF2P1109446           | 48599760 | G | 0.5 | 0.7143 | A |
| 9 | BICF2P1163507           | 48623211 | G | 0.5 | 0.9286 | A |
| 9 | BICF2S22942616          | 48636545 | A | 0   | 0      | G |
| 9 | BICF2P1068851           | 48646932 | A | 0   | 0      | G |

|   |                         |          |   |     |         |   |
|---|-------------------------|----------|---|-----|---------|---|
| 9 | BICF2S23332673          | 48659367 | G | 0   | 0.2143  | A |
| 9 | BICF2P797392            | 48671086 | A | 0   | 0.2143  | C |
| 9 | BICF2P225368            | 48683255 | A | 0   | 0.2143  | G |
| 9 | BICF2P527171            | 48690382 | G | 0   | 0.2143  | A |
| 9 | BICF2P438859            | 48701047 | G | 0   | 0.2143  | A |
| 9 | BICF2P893381            | 48705405 | A | 0   | 0.2143  | G |
| 9 | TIGRP2P128267_rs8519659 | 48721171 | A | 0   | 0       | G |
| 9 | TIGRP2P128273_rs9236038 | 48733796 | G | 0   | 0.2143  | A |
| 9 | BICF2P1118525           | 48737996 | A | 0   | 0       | G |
| 9 | BICF2P837261            | 48753345 | A | 1   | 0.7857  | G |
| 9 | TIGRP2P128297_rs8917036 | 48770158 | A | 1   | 1       | G |
| 9 | BICF2P784482            | 48773668 | C | 0   | 0       | A |
| 9 | BICF2P787226            | 48783692 | A | 0   | 0       | G |
| 9 | G558f21S142             | 48808375 | G | 0   | 0       | A |
| 9 | BICF2S2337209           | 48838821 | G | 0   | 0.2143  | A |
| 9 | BICF2P877383            | 48845444 | A | 0   | 0.2143  | G |
| 9 | TIGRP2P128318_rs8721087 | 48886154 | 0 | 0   | 0       | A |
| 9 | BICF2P276821            | 48887465 | A | 0   | 0.2143  | G |
| 9 | BICF2P877163            | 48899018 | A | 0   | 0       | T |
| 9 | G559f29S224             | 48926954 | 0 | 0   | 0       | C |
| 9 | BICF2S23344580          | 48954611 | A | 0.5 | 0.07143 | C |
| 9 | TIGRP2P128326_rs8980333 | 48962237 | 0 | 0   | 0       | C |
| 9 | BICF2S23341616          | 48966803 | A | 0   | 0.2143  | G |
| 9 | BICF2P115287            | 48977922 | C | 0.5 | 0.2857  | A |
| 9 | BICF2S2378384           | 48988101 | A | 0   | 0.2143  | G |
| 9 | BICF2S2303613           | 48993247 | G | 0   | 0.2143  | A |
| 9 | BICF2P308389            | 49031740 | G | 0   | 0       | A |
| 9 | BICF2P1023003           | 49035645 | A | 0   | 0       | G |
| 9 | BICF2P658015            | 49044029 | G | 0   | 0.2143  | A |
| 9 | BICF2P717103            | 49053754 | C | 0   | 0       | A |
| 9 | TIGRP2P128339_rs8764641 | 49067990 | A | 0   | 0       | C |
| 9 | BICF2P138084            | 49091781 | G | 0.5 | 0.7143  | A |
| 9 | BICF2S23550798          | 49096465 | C | 0   | 0       | A |
| 9 | BICF2P250176            | 49112809 | G | 0   | 0.2143  | C |
| 9 | BICF2P481590            | 49128847 | 0 | 0   | 0       | A |
| 9 | BICF2P1224168           | 49149842 | A | 0.5 | 0.7143  | C |
| 9 | TIGRP2P128352_rs8884996 | 49156971 | 0 | 0   | 0       | G |
| 9 | BICF2S23349985          | 49171051 | A | 0   | 0       | G |
| 9 | BICF2P744503            | 49178694 | A | 0   | 0       | G |
| 9 | BICF2P541694            | 49202776 | 0 | 0   | 0       | G |
| 9 | BICF2P86867             | 49239115 | 0 | 0   | 0       | A |
| 9 | BICF2P7328              | 49247235 | 0 | 0   | 0       | A |
| 9 | BICF2P677632            | 49297354 | 0 | 0   | 0       | C |
| 9 | BICF2P734518            | 49302016 | 0 | NA  | NA      | G |
| 9 | BICF2P602822            | 49318929 | 0 | 0   | 0       | G |
| 9 | BICF2P668409            | 49366371 | A | 0.5 | 0.07143 | G |
| 9 | BICF2S23750594          | 49371822 | G | 1   | 1       | A |



|   |                         |          |   |     |         |   |
|---|-------------------------|----------|---|-----|---------|---|
| 9 | BICF2S2344961           | 49382494 | G | 0   | 0       | A |
| 9 | BICF2S22944553          | 49393822 | A | 0.5 | 0.07143 | G |
| 9 | BICF2S22930300          | 49421872 | A | 1   | 1       | G |
| 9 | TIGRP2P128371_rs8770677 | 49432005 | A | 0.5 | 0.9286  | G |
| 9 | BICF2P1215354           | 49438586 | A | 0.5 | 0.9286  | G |
| 9 | TIGRP2P128377_rs9102944 | 49457418 | A | 1   | 0.7857  | G |
| 9 | BICF2S23513129          | 49470584 | G | 0.5 | 0.07143 | A |
| 9 | BICF2P1128643           | 49476981 | 0 | 0   | 0       | A |
| 9 | BICF2P1135331           | 49489019 | C | 0.5 | 0.75    | A |
| 9 | BICF2P1082893           | 49496520 | G | 0.5 | 1       | A |
| 9 | BICF2P743857            | 49511539 | G | 0.5 | 0.7143  | A |
| 9 | BICF2P1019720           | 49527923 | A | 0   | 0       | G |
| 9 | BICF2S23510795          | 49563673 | A | 0.5 | 0.7143  | G |
| 9 | BICF2S23245733          | 49576999 | A | 0.5 | 0.9286  | G |
| 9 | BICF2P118011            | 49601496 | 0 | 0   | 0       | A |
| 9 | BICF2P213044            | 49651659 | G | 0.5 | 0.7143  | A |
| 9 | BICF2S2297178           | 49677957 | G | 0.5 | 0.9286  | A |
| 9 | BICF2P1157410           | 49681685 | G | 0   | 0       | A |
| 9 | TIGRP2P128417_rs8794272 | 49697706 | G | 0   | 0       | A |
| 9 | TIGRP2P128422_rs9167389 | 49721325 | G | 0   | 0       | A |
| 9 | TIGRP2P128426_rs8798945 | 49750472 | 0 | 0   | 0       | G |
| 9 | BICF2P652148            | 49764978 | G | 0   | 0       | A |
| 9 | BICF2P652147            | 49765017 | A | 0   | 0       | G |
| 9 | TIGRP2P128430_rs8952663 | 49812433 | G | 1   | 0.7857  | A |
| 9 | BICF2P813102            | 49828323 | A | 0   | 0.2143  | C |
| 9 | BICF2P870510            | 49840790 | G | 0   | 0.2143  | A |
| 9 | BICF2S2458144           | 49847373 | G | 0   | 0.2143  | A |
| 9 | BICF2P670814            | 49856011 | G | 0   | 0.2143  | C |
| 9 | TIGRP2P128447_rs9014908 | 49866890 | C | 0   | 0.2143  | A |
| 9 | TIGRP2P128455_rs8789784 | 49887606 | A | 0   | 0       | G |
| 9 | BICF2P124563            | 49902839 | G | 0   | 0       | A |
| 9 | BICF2P328665            | 49931564 | G | 0.5 | 0.2857  | A |
| 9 | BICF2P231855            | 49935877 | C | 0.5 | 0.2857  | G |
| 9 | BICF2S23641012          | 49946865 | A | 0   | 0       | G |
| 9 | BICF2P1917              | 49967976 | A | 0.5 | 0.07143 | G |
| 9 | BICF2P511906            | 49985248 | C | 0   | 0.2143  | G |
| 9 | BICF2P556507            | 50001988 | A | 0   | 0.2143  | G |
| 9 | BICF2P211904            | 50004144 | 0 | 0   | 0       | A |
| 9 | BICF2P670409            | 50017375 | C | 0   | 0.2143  | A |
| 9 | BICF2P766155            | 50032514 | A | 0   | 0.2143  | G |
| 9 | BICF2S23128512          | 50043058 | A | 0   | 0.2143  | G |
| 9 | BICF2P489568            | 50048987 | 0 | 0   | 0       | A |
| 9 | BICF2P1123039           | 50059505 | A | 0   | 0.2143  | T |
| 9 | BICF2P1322349           | 50078526 | A | 0   | 0.2143  | G |
| 9 | BICF2S23620985          | 50087156 | A | 0   | 0.2143  | G |
| 9 | BICF2P741632            | 50112934 | A | 0   | 0       | G |
| 9 | BICF2S2378907           | 50115199 | G | 0   | 0.2143  | A |

|   |                         |          |   |     |         |   |
|---|-------------------------|----------|---|-----|---------|---|
| 9 | TIGRP2P128487_rs8813164 | 50123934 | 0 | 0   | 0       | A |
| 9 | BICF2P730434            | 50143851 | A | 0.5 | 0.7143  | G |
| 9 | BICF2P584446            | 50156097 | A | 0.5 | 0.7143  | G |
| 9 | BICF2P584449            | 50157353 | A | 0.5 | 0.7143  | G |
| 9 | BICF2P853245            | 50164666 | C | 0.5 | 0.7143  | A |
| 9 | BICF2P1405000           | 50184646 | A | 0   | 0.2143  | T |
| 9 | BICF2P827480            | 50195274 | A | 0   | 0       | G |
| 9 | BICF2P728721            | 50204714 | A | 0   | 0.2143  | G |
| 9 | BICF2P428944            | 50212823 | A | 0.5 | 0.07143 | G |
| 9 | BICF2P656033            | 50226004 | A | 0   | 0       | G |
| 9 | BICF2P1074785           | 50239506 | A | 1   | 0.7857  | G |
| 9 | BICF2P971316            | 50246603 | G | 0   | 0       | A |
| 9 | BICF2S23544847          | 50254249 | A | 1   | 0.7857  | G |
| 9 | BICF2P1328170           | 50256378 | G | 0   | 0       | A |
| 9 | BICF2S2337129           | 50264065 | A | 1   | 0.7857  | G |
| 9 | BICF2S23447094          | 50274178 | G | 1   | 0.7857  | A |
| 9 | BICF2P1039318           | 50278780 | A | 0.5 | 0.07143 | C |
| 9 | BICF2P722701            | 50283403 | A | 0.5 | 0.07143 | G |
| 9 | BICF2S23235981          | 50300808 | A | 1   | 1       | G |
| 9 | BICF2P1402973           | 50301756 | G | 1   | 1       | A |
| 9 | BICF2P1347419           | 50314792 | C | 1   | 1       | A |
| 9 | BICF2P193361            | 50332306 | G | 0.5 | 0.9286  | A |
| 9 | BICF2S23119092          | 50338990 | G | 0   | 0.2143  | A |
| 9 | BICF2P429200            | 50349293 | A | 0.5 | 0.7143  | G |
| 9 | BICF2P1431765           | 50373181 | A | 0.5 | 0.07143 | G |
| 9 | BICF2P987828            | 50400487 | G | 0.5 | 0.7143  | A |
| 9 | BICF2P745139            | 50429928 | A | 0.5 | 0.9286  | G |
| 9 | BICF2P1024173           | 50448874 | A | 0   | 0.2143  | G |
| 9 | TIGRP2P128537_rs9110562 | 50450699 | A | 0.5 | 0.9286  | G |
| 9 | TIGRP2P128547_rs8533455 | 50465848 | G | 0.5 | 0.9286  | A |
| 9 | BICF2P1397023           | 50476119 | G | 0.5 | 0.9286  | A |
| 9 | BICF2P1065566           | 50486773 | G | 0.5 | 0.9286  | A |
| 9 | TIGRP2P128566_rs9138929 | 50497241 | C | 0.5 | 0.9286  | A |
| 9 | BICF2S2334024           | 50521907 | A | 0   | 0       | C |
| 9 | BICF2P1273761           | 50522350 | A | 0   | 0.2143  | G |
| 9 | BICF2P1219827           | 50531074 | A | 0   | 0       | G |
| 9 | TIGRP2P128609_rs8410855 | 50554075 | 0 | 0   | 0       | C |
| 9 | TIGRP2P128611_rs9127187 | 50572494 | A | 0.5 | 0.07143 | C |
| 9 | TIGRP2P128621_rs8733943 | 50583142 | G | 0.5 | 0.07143 | A |
| 9 | BICF2P1087851           | 50594034 | C | 0.5 | 0.07143 | A |
| 9 | TIGRP2P128662_rs9134557 | 50622246 | A | 0.5 | 0.2857  | G |
| 9 | BICF2P771876            | 50623503 | A | 0.5 | 0.2857  | G |
| 9 | BICF2P985889            | 50650807 | A | 0.5 | 0.07143 | C |
| 9 | TIGRP2P128715_rs8808183 | 50664855 | A | 0.5 | 0.07143 | G |
| 9 | BICF2P769724            | 50671173 | A | 0   | 0       | G |
| 9 | BICF2S23335630          | 50700064 | G | 0.5 | 0.9286  | A |
| 9 | TIGRP2P128729_rs8762603 | 50703692 | A | 0.5 | 0.7143  | G |

|   |                         |          |   |     |         |   |
|---|-------------------------|----------|---|-----|---------|---|
| 9 | BICF2S23516268          | 50717081 | G | 0.5 | 0.7143  | A |
| 9 | BICF2S23144924          | 50760148 | G | 0.5 | 0.07143 | A |
| 9 | TIGRP2P128737_rs9246744 | 50779969 | A | 1   | 1       | G |
| 9 | BICF2P1168224           | 50783197 | A | 0.5 | 0.9286  | G |
| 9 | BICF2S23243638          | 50793322 | G | 0.5 | 0.07143 | A |
| 9 | BICF2P338413            | 50806437 | G | 0   | 0.2143  | A |
| 9 | BICF2P895198            | 50807463 | 0 | 0   | 0       | C |
| 9 | BICF2P209349            | 50820625 | C | 0   | 0       | G |
| 9 | BICF2S2378056           | 50864181 | A | 0   | 0       | G |
| 9 | TIGRP2P128788_rs8716631 | 50875302 | 0 | 0   | 0       | G |
| 9 | BICF2P1244848           | 50883590 | G | 0.5 | 0.2857  | A |
| 9 | BICF2P1363516           | 50887362 | A | 0   | 0       | G |
| 9 | BICF2P887545            | 50895813 | A | 0   | 0       | G |
| 9 | BICF2P193796            | 50905472 | A | 0   | 0       | G |
| 9 | BICF2S23762723          | 50919127 | G | 0.5 | 0.7143  | A |
| 9 | BICF2P1067525           | 50932385 | A | 0.5 | 0.7143  | G |
| 9 | TIGRP2P128813_rs8695731 | 50941304 | A | 0.5 | 0.7143  | C |
| 9 | BICF2S23741018          | 50951678 | A | 0.5 | 0.7143  | C |
| 9 | TIGRP2P128822_rs8549589 | 50958408 | A | 0.5 | 0.7143  | G |
| 9 | BICF2P1201264           | 50969601 | A | 0   | 0       | G |
| 9 | TIGRP2P128838_rs8916307 | 50988217 | A | 0   | 0       | G |
| 9 | TIGRP2P128840_rs9192125 | 50997142 | A | 0   | 0.2143  | G |
| 9 | TIGRP2P128841_rs8947486 | 51006778 | G | 0   | 0.2143  | C |
| 9 | BICF2P228793            | 51014545 | A | 0   | 0       | C |
| 9 | BICF2P1334587           | 51034733 | A | 0   | 0.2143  | G |
| 9 | BICF2P703007            | 51040585 | A | 0.5 | 0.2857  | G |
| 9 | BICF2P302956            | 51052545 | G | 0   | 0.2143  | A |
| 9 | BICF2P912680            | 51060361 | A | 0   | 0       | C |
| 9 | BICF2P488217            | 51079519 | 0 | 0   | 0       | G |
| 9 | BICF2P1246065           | 51087699 | A | 0   | 0       | G |
| 9 | BICF2P909240            | 51119357 | G | 0   | 0       | A |
| 9 | BICF2P298224            | 51130082 | C | 0.5 | 0.2857  | A |
| 9 | BICF2P857442            | 51146546 | A | 0   | 0.2143  | G |
| 9 | BICF2S2323858           | 51175129 | A | 0   | 0       | G |
| 9 | TIGRP2P128891_rs9209366 | 51194663 | A | 0.5 | 0.7143  | G |
| 9 | BICF2S23130130          | 51198789 | G | 0   | 0       | A |
| 9 | BICF2P249174            | 51201051 | G | 0   | 0       | A |
| 9 | TIGRP2P128900_rs8631906 | 51221705 | C | 0   | 0.2143  | A |
| 9 | BICF2P1393086           | 51242373 | A | 0   | 0       | C |
| 9 | TIGRP2P128932_rs8665036 | 51250936 | A | 0   | 0       | G |
| 9 | BICF2P301757            | 51263005 | G | 0   | 0       | A |
| 9 | BICF2P1246771           | 51267810 | A | 1   | 0.7857  | G |
| 9 | TIGRP2P128980_rs8721400 | 51296665 | A | 0   | 0.2143  | G |
| 9 | BICF2P652670            | 51312663 | A | 0   | 0       | C |
| 9 | TIGRP2P128991_rs8969837 | 51313281 | A | 0   | 0.2143  | G |
| 9 | BICF2S23055092          | 51321528 | A | 0   | 0       | G |
| 9 | BICF2P1102514           | 51337114 | G | 0   | 0.2143  | A |

|   |                         |          |   |     |         |   |
|---|-------------------------|----------|---|-----|---------|---|
| 9 | BICF2S23718138          | 51348535 | A | 0.5 | 0.9286  | G |
| 9 | BICF2P529428            | 51360314 | A | 0   | 0.2143  | G |
| 9 | BICF2P1104030           | 51371569 | A | 0   | 0.2143  | G |
| 9 | BICF2S23337863          | 51385150 | A | 0   | 0.2143  | G |
| 9 | TIGRP2P129027_rs9099916 | 51400287 | G | 0   | 0.2143  | A |
| 9 | BICF2P200734            | 51413134 | 0 | 0   | 0       | A |
| 9 | BICF2P803441            | 51419010 | G | 0   | 0.1     | A |
| 9 | BICF2P42147             | 51433690 | C | 0   | 0.2143  | A |
| 9 | BICF2S23350844          | 51441375 | A | 0   | 0.2143  | G |
| 9 | BICF2P44150             | 51442214 | G | 0   | 0.2143  | A |
| 9 | TIGRP2P129044_rs8741436 | 51462443 | G | 0   | 0.2143  | A |
| 9 | TIGRP2P129049_rs9195111 | 51467656 | G | 0   | 0.2143  | A |
| 9 | BICF2S2349353           | 51474094 | A | 0   | 0.2143  | G |
| 9 | BICF2S24318085          | 51486130 | G | 0   | 0.2143  | A |
| 9 | BICF2S22964348          | 51507910 | G | 0.5 | 0.07143 | A |
| 9 | BICF2P1254880           | 51510298 | A | 0.5 | 0.9     | G |
| 9 | BICF2P753594            | 51531181 | C | 0.5 | 0.07143 | G |
| 9 | BICF2P436494            | 51541093 | G | 0.5 | 0.07143 | A |
| 9 | BICF2P812982            | 51544743 | G | 1   | 0.7857  | A |
| 9 | BICF2S23637363          | 51559722 | A | 0.5 | 0.7143  | G |
| 9 | TIGRP2P129061_rs8664018 | 51566046 | C | 0   | 0       | A |
| 9 | BICF2P252142            | 51586633 | G | 0   | 0       | A |
| 9 | BICF2P1411970           | 51598927 | G | 0   | 0       | A |
| 9 | BICF2P1140358           | 51604841 | G | 0.5 | 0.7143  | A |
| 9 | BICF2S23250278          | 51608113 | G | 0   | 0       | A |
| 9 | BICF2P1006218           | 51612020 | A | 0.5 | 0.7143  | G |
| 9 | BICF2P397161            | 51627370 | C | 0   | 0.2143  | G |
| 9 | BICF2P890149            | 51638986 | C | 0.5 | 0.7143  | A |
| 9 | BICF2P792225            | 51647269 | A | 0   | 0.2143  | G |
| 9 | BICF2P811886            | 51658185 | G | 0   | 0.2143  | A |
| 9 | TIGRP2P129092_rs8536134 | 51686265 | G | 0   | 0.2143  | A |
| 9 | BICF2P775027            | 51700199 | G | 0   | 0.2143  | A |
| 9 | BICF2P1000848           | 51711557 | A | 0   | 0.2143  | G |
| 9 | BICF2P639277            | 51718368 | G | 0   | 0.2143  | A |
| 9 | BICF2P319158            | 51729342 | A | 0   | 0       | G |
| 9 | BICF2P482628            | 51749460 | A | 0.5 | 0.9286  | G |
| 9 | BICF2P703190            | 51753587 | A | 0   | 0       | G |
| 9 | BICF2P256008            | 51771477 | A | 0   | 0       | G |
| 9 | BICF2S22931940          | 51776397 | G | 0   | 0       | A |
| 9 | BICF2P397932            | 51790792 | A | 0   | 0       | G |
| 9 | BICF2S22924196          | 51797485 | G | 0   | 0.2143  | A |
| 9 | BICF2P516508            | 51801364 | C | 0   | 0.1667  | A |
| 9 | BICF2P637580            | 51802905 | A | 0   | 0       | G |
| 9 | BICF2P190561            | 51805265 | G | 0   | 0.2143  | A |
| 9 | TIGRP2P129106_rs8663142 | 51807706 | A | 0   | 0       | G |
| 9 | BICF2P727531            | 51830460 | 0 | 0   | 0       | C |
| 9 | BICF2P984103            | 51837212 | A | 0   | 0       | G |

|   |                         |          |   |     |        |   |
|---|-------------------------|----------|---|-----|--------|---|
| 9 | BICF2P548016            | 51843521 | 0 | 0   | 0      | G |
| 9 | TIGRP2P129131_rs8518454 | 51869219 | 0 | 0   | 0      | G |
| 9 | TIGRP2P129127_rs8763537 | 51886593 | A | 0   | 0      | C |
| 9 | BICF2P622646            | 51901712 | 0 | 0   | 0      | G |
| 9 | BICF2P644148            | 51918440 | A | 0   | 0      | G |
| 9 | BICF2P606548            | 51920369 | G | 0   | 0.2857 | A |
| 9 | TIGRP2P129154_rs8687471 | 51925096 | 0 | 0   | 0      | C |
| 9 | BICF2S23212770          | 51937041 | G | 0   | 0.2857 | A |
| 9 | BICF2P1070652           | 51946848 | 0 | 0   | 0      | G |
| 9 | BICF2S23252934          | 51967363 | A | 0   | 0.2857 | G |
| 9 | BICF2S23020433          | 51968798 | A | 0   | 0      | G |
| 9 | BICF2P1197297           | 51995718 | A | 0   | 0      | G |
| 9 | BICF2P974723            | 52004352 | A | 0   | 0.2857 | G |
| 9 | BICF2P506351            | 52021997 | G | 0   | 0.2857 | A |
| 9 | BICF2P84548             | 52031784 | G | 0   | 0      | A |
| 9 | TIGRP2P129190_rs8711268 | 52039407 | 0 | 0   | 0      | A |
| 9 | TIGRP2P129192_rs8703617 | 52054123 | 0 | 0   | 0      | G |
| 9 | BICF2P1167937           | 52068696 | G | 0   | 0.2857 | A |
| 9 | BICF2P583133            | 52079014 | 0 | 0   | 0      | A |
| 9 | TIGRP2P129194_rs8744612 | 52084099 | A | 0.5 | 0.9286 | G |
| 9 | BICF2P1291044           | 52091000 | A | 0.5 | 0.6429 | C |
| 9 | BICF2P873793            | 52103960 | A | 0.5 | 0.9286 | G |
| 9 | BICF2P1320464           | 52108416 | C | 0   | 0      | A |
| 9 | TIGRP2P129215_rs9099372 | 52120272 | A | 0   | 0      | G |
| 9 | BICF2S23126657          | 52134506 | C | 0.5 | 0.6429 | A |
| 9 | TIGRP2P129233_rs9186861 | 52151161 | A | 0.5 | 0.3333 | C |
| 9 | BICF2P281284            | 52168984 | G | 0.5 | 0.6429 | A |
| 9 | BICF2S2347140           | 52169759 | G | 0.5 | 0.6429 | A |
| 9 | BICF2P306818            | 52179837 | G | 0   | 0.2857 | A |
| 9 | TIGRP2P129272_rs8641580 | 52194953 | 0 | 0   | 0      | G |
| 9 | BICF2P893407            | 52204925 | 0 | 0   | 0      | C |
| 9 | BICF2S23647327          | 52218839 | A | 0   | 0      | G |
| 9 | BICF2S2378118           | 52224422 | G | NA  | 0.7    | A |
| 9 | BICF2S2339614           | 52248874 | A | 0   | 0      | G |
| 9 | BICF2S2328598           | 52260242 | A | 0   | 0      | G |
| 9 | BICF2S2352066           | 52278068 | A | 0   | 0.2857 | G |
| 9 | BICF2P303551            | 52287032 | G | 0   | 0.2857 | A |
| 9 | BICF2P647469            | 52297856 | A | 0   | 0      | G |
| 9 | BICF2P109365            | 52301819 | G | 0   | 0      | A |
| 9 | BICF2P844104            | 52304882 | A | 0   | 0      | G |
| 9 | BICF2P817799            | 52313765 | A | 0   | 0      | G |
| 9 | TIGRP2P129293_rs8755542 | 52321840 | G | 0   | 0      | A |
| 9 | BICF2S23744222          | 52321973 | C | 0   | 0      | A |
| 9 | BICF2P297674            | 52357101 | A | 0   | 0      | G |
| 9 | BICF2P564059            | 52369572 | G | 0   | 0      | A |
| 9 | BICF2P629182            | 52379088 | A | 0   | 0      | G |
| 9 | BICF2P1211075           | 52396159 | G | 0.5 | 0.6429 | A |

|   |                         |          |   |     |         |   |
|---|-------------------------|----------|---|-----|---------|---|
| 9 | BICF2P8703              | 52407975 | A | 0   | 0.2857  | G |
| 9 | BICF2P122488            | 52412215 | G | 0   | 0       | A |
| 9 | BICF2P1342526           | 52419107 | A | 0   | 0       | G |
| 9 | BICF2P238373            | 52439042 | C | 0   | 0       | A |
| 9 | TIGRP2P129352_rs9162246 | 52446517 | G | 0   | 0       | A |
| 9 | BICF2P531661            | 52457710 | A | 0   | 0.2857  | G |
| 9 | BICF2S23432055          | 52463786 | A | 0.5 | 0.3571  | G |
| 9 | BICF2S23534851          | 52488483 | A | 0   | 0       | G |
| 9 | TIGRP2P129361_rs8671574 | 52506731 | 0 | 0   | 0       | C |
| 9 | BICF2P939212            | 52515720 | A | 0.5 | 0.6667  | G |
| 9 | BICF2P1074567           | 52529598 | A | 0   | 0       | G |
| 9 | BICF2P765849            | 52539409 | G | 1   | 0.7143  | A |
| 9 | BICF2P785316            | 52543809 | G | 1   | 0.7143  | A |
| 9 | BICF2S24313274          | 52548772 | G | 0.5 | 0.07143 | A |
| 9 | BICF2P991130            | 52552788 | C | 0   | 0       | A |
| 9 | BICF2P330625            | 52566004 | 0 | 0   | 0       | G |
| 9 | BICF2P1463303           | 52571959 | 0 | 0   | 0       | C |
| 9 | BICF2P164035            | 52580736 | G | 0.5 | 0.6429  | A |
| 9 | BICF2P1044590           | 52590146 | 0 | 0   | 0       | G |
| 9 | BICF2S23728647          | 52622327 | A | 0   | 0       | G |
| 9 | BICF2P548713            | 52631430 | 0 | 0   | 0       | G |
| 9 | BICF2P976080            | 52638438 | G | 0   | 0       | A |
| 9 | TIGRP2P129367_rs9148074 | 52647113 | G | 0   | 0       | A |
| 9 | TIGRP2P129370_rs8971072 | 52677766 | A | 0   | 0       | G |
| 9 | BICF2P724217            | 52685912 | 0 | 0   | 0       | A |
| 9 | BICF2P1300203           | 52716974 | A | 1   | 1       | G |
| 9 | BICF2S23442116          | 52734860 | G | 0.5 | 0.9286  | A |
| 9 | BICF2P1211975           | 52750232 | C | NA  | 0.07143 | A |
| 9 | BICF2S23429475          | 52753363 | A | 0.5 | 0.9286  | G |
| 9 | BICF2P793049            | 52769832 | A | 0.5 | 0.07143 | G |
| 9 | BICF2P190430            | 52784985 | A | 0   | 0       | G |
| 9 | BICF2P500532            | 52787108 | A | 0   | 0       | G |
| 9 | BICF2S23660309          | 52800493 | 0 | 0   | 0       | G |
| 9 | TIGRP2P129440_rs8527216 | 52808839 | A | 0   | 0       | G |
| 9 | BICF2P999649            | 52837345 | A | 0   | 0       | G |
| 9 | BICF2S22927010          | 52853393 | G | 0   | 0       | A |
| 9 | BICF2S2364068           | 52858907 | G | 0   | 0       | A |
| 9 | BICF2P123779            | 52866013 | A | 0   | 0       | G |
| 9 | BICF2P282196            | 52890645 | A | 0   | 0       | G |
| 9 | BICF2P1427387           | 52911441 | A | 0   | 0       | G |
| 9 | TIGRP2P129471_rs8521846 | 52914591 | A | 0   | 0       | G |
| 9 | BICF2S23526489          | 52932223 | A | 0   | 0       | G |
| 9 | BICF2S23448869          | 52943184 | A | 0   | 0       | G |
| 9 | BICF2S23145223          | 52951579 | G | 0.5 | 0.3571  | A |
| 9 | BICF2S2306795           | 52959759 | A | 0   | 0       | G |
| 9 | BICF2P1124087           | 52982519 | A | 0   | 0       | G |
| 9 | BICF2P256562            | 52993153 | A | 0.5 | 0.6429  | G |

|   |                         |          |   |     |         |   |
|---|-------------------------|----------|---|-----|---------|---|
| 9 | BICF2P1162299           | 53011815 | G | 0   | 0.2857  | A |
| 9 | BICF2P927936            | 53042416 | A | 0   | 0       | G |
| 9 | TIGRP2P129553_rs8718298 | 53051476 | G | 0.5 | 0.3571  | A |
| 9 | TIGRP2P129559_rs8636429 | 53067899 | G | 0   | 0       | A |
| 9 | BICF2P918885            | 53090966 | G | 0   | 0.2857  | A |
| 9 | BICF2P921172            | 53092375 | G | 0   | 0.2857  | A |
| 9 | TIGRP2P129599_rs9240916 | 53104428 | A | 0   | 0       | C |
| 9 | BICF2P312976            | 53108740 | 0 | 0   | 0       | A |
| 9 | TIGRP2P129629_rs9186227 | 53119227 | G | 1   | 0.7143  | A |
| 9 | BICF2P137043            | 53119291 | C | 0   | 0       | A |
| 9 | BICF2P1458179           | 53134489 | A | 1   | 0.7143  | G |
| 9 | TIGRP2P129637_rs9240980 | 53147175 | A | 0   | 0       | G |
| 9 | BICF2P1294495           | 53164139 | A | 0.5 | 0.07143 | C |
| 9 | BICF2P191114            | 53168805 | G | 1   | 0.7143  | A |
| 9 | BICF2S23326566          | 53179985 | A | 0.5 | 0.3571  | G |
| 9 | BICF2P547120            | 53190570 | A | 0   | 0       | G |
| 9 | BICF2P616809            | 53200903 | G | 0   | 0       | A |
| 9 | TIGRP2P129681_rs9051446 | 53219024 | G | 0.5 | 0.9286  | A |
| 9 | BICF2S23210310          | 53222717 | G | 1   | 1       | A |
| 9 | BICF2P1092146           | 53236128 | G | 0   | 0.2857  | A |
| 9 | BICF2P883005            | 53245168 | A | 0   | 0.2857  | G |
| 9 | BICF2P322734            | 53247168 | T | 0   | 0       | A |
| 9 | BICF2P1435841           | 53260497 | A | 0   | 0       | G |
| 9 | BICF2P958064            | 53268923 | A | 0   | 0.2857  | G |
| 9 | TIGRP2P129751_rs9023276 | 53281469 | A | 0.5 | 0.07143 | C |
| 9 | BICF2P208328            | 53311286 | A | 0   | 0       | C |
| 9 | TIGRP2P129767_rs8946542 | 53319697 | G | 0.5 | 0.9286  | A |
| 9 | BICF2P1285681           | 53344381 | A | 0   | 0       | G |
| 9 | BICF2P1244419           | 53350831 | C | 0   | 0.2857  | A |
| 9 | BICF2P677185            | 53358804 | A | 0.5 | 0.6429  | G |
| 9 | TIGRP2P129812_rs9131794 | 53362465 | A | 0   | 0       | G |
| 9 | TIGRP2P129832_rs8939254 | 53382144 | G | 0   | 0       | A |
| 9 | BICF2P557640            | 53390456 | A | 0.5 | 0.07143 | G |
| 9 | TIGRP2P129856_rs8518300 | 53405653 | A | 0   | 0.2857  | G |
| 9 | BICF2P873768            | 53416652 | A | 0   | 0       | G |
| 9 | BICF2P890246            | 53427907 | A | 0.5 | 0.6429  | C |
| 9 | BICF2P139678            | 53432248 | G | 0.5 | 0.6429  | A |
| 9 | BICF2S22925948          | 53449693 | A | 0.5 | 0.07143 | C |
| 9 | BICF2S23060805          | 53454666 | A | 0   | 0.2857  | G |
| 9 | BICF2P1435064           | 53467382 | A | 0.5 | 0.6429  | G |
| 9 | BICF2P508245            | 53479879 | A | 0.5 | 0.2143  | G |
| 9 | BICF2S23532268          | 53488481 | 0 | 0   | 0       | A |
| 9 | BICF2P279425            | 53511717 | G | 0   | 0.4286  | A |
| 9 | BICF2G630471369         | 53524200 | A | 1   | 0.5714  | G |
| 9 | TIGRP2P129898_rs8585914 | 53540542 | A | 0   | 0       | G |
| 9 | BICF2G630471393         | 53553642 | G | 0   | 0       | A |
| 9 | BICF2P1240963           | 53566327 | G | 0   | 0       | A |

|   |                         |          |   |      |         |   |
|---|-------------------------|----------|---|------|---------|---|
| 9 | BICF2G630471426         | 53576331 | G | 0    | 0.7143  | A |
| 9 | BICF2P125601            | 53583727 | G | 0    | 0       | A |
| 9 | BICF2S23510528          | 53583799 | A | 0    | 0       | G |
| 9 | BICF2G630471456         | 53593365 | G | 0.5  | 0.2143  | A |
| 9 | BICF2G630471474         | 53604092 | A | 0.5  | 0.07143 | G |
| 9 | BICF2G630471485         | 53614761 | A | 0    | 0       | G |
| 9 | TIGRP2P129917_rs9100460 | 53630720 | A | 0    | 0       | G |
| 9 | BICF2P253892            | 53647141 | A | 0    | 0       | G |
| 9 | BICF2P1151426           | 53654938 | G | 0    | 0       | A |
| 9 | BICF2S23722590          | 53661171 | A | 0    | 0       | G |
| 9 | TIGRP2P129923_rs8776947 | 53677101 | 0 | 0    | 0       | G |
| 9 | BICF2G630471505         | 53686935 | G | 0.5  | 0.2143  | A |
| 9 | BICF2S23528651          | 53694665 | G | 0    | 0       | A |
| 9 | TIGRP2P129930_rs9120744 | 53712888 | G | 0.5  | 0.5     | A |
| 9 | BICF2S23424188          | 53723172 | A | 1    | 0.5714  | G |
| 9 | BICF2P896777            | 53728979 | A | 0    | 0       | G |
| 9 | BICF2P1223940           | 53737240 | A | 0    | 0       | G |
| 9 | BICF2P479842            | 53749466 | A | 0    | 0       | G |
| 9 | BICF2P695100            | 53754603 | G | 1    | 0.5714  | A |
| 9 | BICF2G630471519         | 53775758 | A | 0    | 0       | G |
| 9 | BICF2G630471540         | 53786456 | C | 0.75 | 0.7143  | G |
| 9 | BICF2G630471561         | 53798571 | A | 0    | 0       | G |
| 9 | BICF2P332614            | 53808540 | G | 0.75 | 0.2857  | C |
| 9 | BICF2P103048            | 53812050 | A | 0    | 0       | C |
| 9 | BICF2G630471581         | 53824729 | A | 0.25 | 0.2143  | G |
| 9 | BICF2G630471600         | 53832977 | G | 0.25 | 0.2857  | A |
| 9 | BICF2G630471619         | 53844084 | A | 0    | 0       | G |
| 9 | BICF2P284322            | 53860854 | A | 0.25 | 0.2143  | G |
| 9 | TIGRP2P129993_rs8552460 | 53867878 | A | 0.25 | 0.2857  | G |
| 9 | BICF2G630471623         | 53878197 | A | 0    | 0       | C |
| 9 | BICF2P491579            | 53889120 | 0 | 0    | 0       | C |
| 9 | BICF2P396584            | 53908928 | 0 | 0    | 0       | A |
| 9 | TIGRP2P130010_rs8782369 | 53911191 | G | 0    | 0       | A |
| 9 | BICF2P1440236           | 53915832 | G | 1    | 1       | A |
| 9 | BICF2S23612368          | 53933741 | A | 0.75 | 0.7857  | G |
| 9 | BICF2G630471691         | 53935027 | C | 0.75 | 0.7857  | A |
| 9 | BICF2G630471710         | 53949938 | G | 0.25 | 0.07143 | A |
| 9 | BICF2G630471723         | 53959116 | A | 0.25 | 0.07143 | G |
| 9 | BICF2G630471730         | 53971544 | A | 0.25 | 0.07143 | G |
| 9 | BICF2S23027868          | 53993581 | G | 0.25 | 0.2857  | A |
| 9 | BICF2P1089188           | 54008962 | G | 0.25 | 0.2857  | A |
| 9 | BICF2P1288943           | 54020234 | A | 0.25 | 0.2143  | G |
| 9 | BICF2G630471776         | 54021524 | A | 0.25 | 0.07143 | G |
| 9 | BICF2G630471795         | 54034371 | A | 0.25 | 0.07143 | G |
| 9 | BICF2P486655            | 54043880 | A | 0.25 | 0.07143 | G |
| 9 | BICF2G630471817         | 54051733 | G | 0.5  | 0.3571  | A |
| 9 | BICF2P341993            | 54061884 | G | 0.75 | 0.5714  | A |



|   |                         |          |   |      |         |   |
|---|-------------------------|----------|---|------|---------|---|
| 9 | BICF2G630471847         | 54073987 | A | 0.25 | 0.2143  | G |
| 9 | BICF2G630471849         | 54074394 | A | 0.25 | 0.2143  | C |
| 9 | BICF2P375522            | 54090257 | A | 0.5  | 0.2857  | G |
| 9 | BICF2G630471885         | 54102643 | G | 0.75 | 0.9286  | A |
| 9 | BICF2S232615            | 54117001 | A | 0    | 0       | G |
| 9 | BICF2G630471901         | 54121319 | G | 0.5  | 0.3571  | A |
| 9 | BICF2G630471905         | 54123105 | A | 0.5  | 0.6429  | C |
| 9 | BICF2G630471924         | 54133820 | G | 0.5  | 0.5     | A |
| 9 | BICF2G630471955         | 54142867 | C | 0.75 | 0.9286  | A |
| 9 | BICF2G630471963         | 54150569 | A | 0.25 | 0.2143  | G |
| 9 | BICF2P1283147           | 54155327 | C | 0.75 | 0.9286  | A |
| 9 | BICF2P1212798           | 54166667 | C | 0.25 | 0.2857  | A |
| 9 | BICF2P394159            | 54180503 | A | 0.25 | 0.2857  | G |
| 9 | BICF2P614388            | 54195788 | 0 | 0    | 0       | G |
| 9 | BICF2S23414295          | 54213641 | A | 0.75 | 0.7143  | C |
| 9 | BICF2P907446            | 54223642 | A | 1    | 1       | G |
| 9 | BICF2P542856            | 54234693 | G | 0    | 0       | A |
| 9 | BICF2P683989            | 54245897 | G | 0.25 | 0.2857  | A |
| 9 | TIGRP2P130130_rs8612259 | 54258162 | A | 0.5  | 0.7143  | G |
| 9 | TIGRP2P130136_rs8985683 | 54268774 | G | 1    | 1       | A |
| 9 | BICF2P1065550           | 54288486 | G | 0.5  | 0.2857  | A |
| 9 | BICF2P389259            | 54291590 | G | 0.5  | 0.2857  | A |
| 9 | BICF2P1124257           | 54312611 | A | 0.5  | 0.2857  | G |
| 9 | BICF2P239575            | 54319975 | G | 0.5  | 0.2857  | A |
| 9 | BICF2S23124778          | 54332690 | A | 0.5  | 0.2857  | G |
| 9 | BICF2P770237            | 54340844 | G | 0.5  | 0.2857  | A |
| 9 | BICF2S23762962          | 54358448 | G | 0.75 | 0.5714  | A |
| 9 | BICF2P526893            | 54361262 | A | 0.5  | 0.2857  | G |
| 9 | BICF2G630472112         | 54373687 | G | 0.75 | 0.5714  | A |
| 9 | BICF2G630472165         | 54388409 | A | 0.5  | 0.2857  | G |
| 9 | TIGRP2P130201_rs9174363 | 54397820 | A | 0.75 | 0.7143  | G |
| 9 | BICF2P1007163           | 54408431 | G | 0.25 | 0.2857  | A |
| 9 | TIGRP2P130209_rs8912128 | 54429433 | C | 0    | 0       | A |
| 9 | BICF2S23323292          | 54431088 | C | 0.25 | 0.2143  | A |
| 9 | BICF2S22953468          | 54442883 | A | 0    | 0       | G |
| 9 | BICF2P745330            | 54445782 | A | 0.25 | 0.2143  | C |
| 9 | BICF2P22244             | 54461445 | A | 0.75 | 0.5714  | G |
| 9 | BICF2G630472198         | 54464376 | A | 0.75 | 0.5714  | G |
| 9 | BICF2S23637801          | 54486138 | G | 0.25 | 0.2857  | A |
| 9 | BICF2S22926196          | 54496873 | G | 0.5  | 0.7143  | A |
| 9 | BICF2P318602            | 54505902 | G | 0.25 | 0.2857  | A |
| 9 | TIGRP2P130260_rs8567497 | 54511647 | G | 0.5  | 0.75    | A |
| 9 | BICF2G630472226         | 54531979 | A | 0.25 | 0.07143 | G |
| 9 | BICF2G630472234         | 54534620 | A | 0.25 | 0.2857  | G |
| 9 | TIGRP2P130274_rs9085907 | 54554627 | C | 0.75 | 0.9286  | A |
| 9 | BICF2P1192833           | 54576427 | G | 0.5  | 0.6429  | A |
| 9 | BICF2G630472379         | 54613382 | A | 0.5  | 0.3571  | G |

|   |                         |          |   |      |         |   |
|---|-------------------------|----------|---|------|---------|---|
| 9 | BICF2G630472384         | 54619276 | C | 0    | 0       | A |
| 9 | BICF2G630472411         | 54630170 | A | 0.25 | 0.2143  | G |
| 9 | BICF2G630472413         | 54630529 | A | 0    | 0       | G |
| 9 | BICF2G630472427         | 54642128 | A | 0.25 | 0.07143 | G |
| 9 | TIGRP2P130442_rs9045528 | 54664169 | A | 0    | 0       | G |
| 9 | BICF2G630472439         | 54681918 | A | 0.25 | 0.2857  | G |
| 9 | BICF2G630472444         | 54688309 | A | 0.25 | 0.07143 | G |
| 9 | BICF2G630472456         | 54700573 | A | 0    | 0       | G |
| 9 | TIGRP2P130456_rs9093736 | 54705690 | G | 0    | 0       | A |
| 9 | BICF2P12439             | 54719853 | A | 0    | 0       | T |
| 9 | BICF2P483579            | 54737535 | A | 0.25 | 0.4167  | G |
| 9 | TIGRP2P130470_rs8646545 | 54741094 | A | 0.25 | 0.4286  | G |
| 9 | TIGRP2P130488_rs8978311 | 54757052 | A | 0    | 0.1667  | G |
| 9 | TIGRP2P130490_rs8798256 | 54765681 | A | 0.25 | 0.2143  | G |
| 9 | TIGRP2P130497_rs8680413 | 54793417 | G | 0.25 | 0.2143  | A |
| 9 | BICF2P481093            | 54799094 | 0 | 0    | 0       | C |
| 9 | TIGRP2P130503_rs9151713 | 54811711 | G | 0.25 | 0.2143  | A |
| 9 | BICF2P450113            | 54825215 | C | 0.5  | 0.7143  | G |
| 9 | TIGRP2P130505_rs9053208 | 54830267 | 0 | 0    | 0       | C |
| 9 | BICF2P1158102           | 54831983 | G | 0.75 | 0.7857  | A |
| 9 | TIGRP2P130516_rs8926411 | 54835079 | 0 | 0    | 0       | A |
| 9 | BICF2P363876            | 54843232 | G | 0.75 | 0.7857  | A |
| 9 | BICF2P248182            | 54865628 | 0 | 0    | 0       | G |
| 9 | BICF2P682211            | 54877462 | A | 0.75 | 0.7857  | C |
| 9 | BICF2P616824            | 54878823 | A | 0.5  | 0.7143  | G |
| 9 | BICF2P604164            | 54905965 | G | 0.5  | 0.7143  | A |
| 9 | TIGRP2P130554_rs8779530 | 54914082 | 0 | 0    | 0       | C |
| 9 | TIGRP2P130572_rs8797279 | 54931039 | A | 0.25 | 0.2857  | G |
| 9 | TIGRP2P130576_rs8554526 | 54940937 | G | 0.25 | 0.2857  | A |
| 9 | BICF2S23335684          | 54947321 | G | 0.75 | 0.7143  | A |
| 9 | BICF2S23028674          | 54960776 | A | 0.75 | 0.7143  | G |
| 9 | BICF2S23412537          | 54977993 | G | 0    | 0       | A |
| 9 | BICF2P180522            | 54988833 | 0 | 0    | 0       | C |
| 9 | BICF2P953438            | 55001289 | 0 | 0    | 0       | A |
| 9 | BICF2P942910            | 55010852 | 0 | 0    | 0       | C |
| 9 | BICF2P791614            | 55020057 | 0 | 0    | 0       | G |
| 9 | BICF2S22964777          | 55034651 | G | 0    | 0       | A |
| 9 | TIGRP2P130587_rs8529768 | 55039729 | 0 | 0    | 0       | G |
| 9 | BICF2P498993            | 55053632 | G | 0.5  | 0.5     | A |
| 9 | BICF2P953835            | 55063714 | C | 0.75 | 0.7143  | A |
| 9 | BICF2P878354            | 55079026 | G | 0.25 | 0.2857  | A |
| 9 | BICF2P1213766           | 55091879 | A | 0.5  | 0.5     | G |
| 9 | BICF2P1154988           | 55108962 | A | 0.5  | 0.5     | C |
| 9 | BICF2P626451            | 55125765 | A | 0.25 | 0.2857  | G |
| 9 | TIGRP2P130620_rs8982512 | 55126652 | G | 1    | 1       | A |
| 9 | BICF2P626445            | 55126889 | A | 0.75 | 0.7143  | G |
| 9 | TIGRP2P130630_rs9031670 | 55136902 | A | 0    | 0       | G |

|   |                         |          |   |      |         |   |
|---|-------------------------|----------|---|------|---------|---|
| 9 | BICF2P295436            | 55147111 | A | 0    | 0       | G |
| 9 | BICF2P894661            | 55150926 | C | 0    | 0       | A |
| 9 | BICF2S23036930          | 55151562 | G | 0    | 0       | A |
| 9 | BICF2P1332188           | 55156151 | G | 1    | 1       | A |
| 9 | TIGRP2P130673_rs9162745 | 55172832 | G | 0.5  | 0.5     | A |
| 9 | TIGRP2P130677_rs8817121 | 55182277 | 0 | 0    | 0       | C |
| 9 | BICF2S23320322          | 55188785 | A | 0.5  | 0.5     | G |
| 9 | BICF2P673428            | 55196374 | A | 0.5  | 0.5     | G |
| 9 | BICF2S23151937          | 55204212 | A | 0.75 | 0.5714  | G |
| 9 | BICF2S23059999          | 55211825 | A | 0.75 | 0.5714  | G |
| 9 | TIGRP2P130690_rs8984279 | 55223958 | A | 0    | 0       | G |
| 9 | BICF2P931102            | 55244311 | G | 0.25 | 0.4286  | A |
| 9 | BICF2P964841            | 55247180 | G | 0.25 | 0.4286  | A |
| 9 | BICF2P1034906           | 55262509 | A | 0.25 | 0.07143 | C |
| 9 | BICF2P753263            | 55269171 | A | 0.25 | 0.4167  | G |
| 9 | BICF2S23412455          | 55290577 | G | 0.5  | 0.5     | A |
| 9 | BICF2P1222342           | 55293558 | A | 0.25 | 0.07143 | G |
| 9 | TIGRP2P130713_rs8734558 | 55304464 | G | 0.5  | 0.5     | A |
| 9 | BICF2S23115489          | 55325806 | A | 0.5  | 0.5     | G |
| 9 | BICF2P247546            | 55328597 | A | 0.25 | 0.07143 | G |
| 9 | BICF2P1222181           | 55342184 | A | 0    | 0       | G |
| 9 | BICF2P1164698           | 55354587 | G | 0.25 | 0.2143  | A |
| 9 | BICF2G630472510         | 55363345 | A | 0    | 0       | G |
| 9 | BICF2G630472535         | 55373115 | A | 0    | 0       | G |
| 9 | BICF2G630472576         | 55389878 | C | 0.25 | 0.4286  | G |
| 9 | BICF2P794932            | 55395493 | G | 0.5  | 0.5     | A |
| 9 | BICF2G630472587         | 55397658 | A | 0.25 | 0.07143 | G |
| 9 | BICF2G630472601         | 55410253 | A | 0.25 | 0.07143 | G |
| 9 | BICF2G630472603         | 55424673 | G | 0    | 0       | A |
| 9 | BICF2P923313            | 55434860 | G | 0    | 0.2857  | A |
| 9 | BICF2G630472614         | 55450015 | T | 0.25 | 0.07143 | A |
| 9 | BICF2G630472626         | 55454248 | G | 0.25 | 0.07143 | A |
| 9 | BICF2G630472651         | 55471508 | C | 0.75 | 0.9286  | A |
| 9 | BICF2P128722            | 55476833 | 0 | 0    | 0       | T |
| 9 | BICF2G630472676         | 55492446 | A | 0.25 | 0.07143 | G |
| 9 | BICF2G630472687         | 55498890 | A | 0.25 | 0.07143 | G |
| 9 | BICF2G630472698         | 55504171 | G | 0    | 0       | C |
| 9 | BICF2G630472721         | 55519178 | A | 0.25 | 0.07143 | G |
| 9 | BICF2G630472726         | 55528983 | A | 0.25 | 0.07143 | G |
| 9 | BICF2G630472733         | 55542371 | A | 0.25 | 0.07143 | T |
| 9 | BICF2G630472745         | 55554206 | C | 1    | 1       | A |
| 9 | BICF2G630472749         | 55559601 | A | 1    | 1       | C |
| 9 | BICF2G630472761         | 55573992 | G | 1    | 1       | A |
| 9 | BICF2G630472763         | 55582299 | A | 0    | 0       | G |
| 9 | BICF2G630472772         | 55597190 | A | 1    | 1       | G |
| 9 | BICF2G630472775         | 55612232 | A | 0    | 0       | G |
| 9 | BICF2G630472776         | 55614162 | G | 0    | 0       | A |

|   |                         |          |   |      |         |   |
|---|-------------------------|----------|---|------|---------|---|
| 9 | BICF2G630472783         | 55632302 | A | 1    | 1       | G |
| 9 | BICF2G630472789         | 55640762 | T | 1    | 1       | A |
| 9 | BICF2G630472790         | 55650085 | A | 1    | 1       | G |
| 9 | BICF2G630472807         | 55659119 | A | 0    | 0       | G |
| 9 | BICF2G630472811         | 55662017 | C | 1    | 1       | A |
| 9 | BICF2P503466            | 55682005 | A | 0.25 | 0.07143 | G |
| 9 | BICF2G630472858         | 55687396 | A | 0.25 | 0.07143 | C |
| 9 | BICF2G630472860         | 55696925 | A | 0    | 0       | G |
| 9 | BICF2P935988            | 55709278 | A | 0    | 0       | G |
| 9 | BICF2G630472906         | 55722536 | A | 1    | 1       | G |
| 9 | BICF2P75315             | 55727957 | A | 0    | 0       | G |
| 9 | BICF2S23651341          | 55733175 | G | 0.25 | 0.2857  | A |
| 9 | BICF2P197561            | 55745277 | A | 0    | 0       | G |
| 9 | BICF2P567070            | 55774365 | A | 0    | 0       | G |
| 9 | BICF2G630472983         | 55781647 | A | 1    | 1       | G |
| 9 | BICF2P755372            | 55792401 | A | 0.25 | 0.07143 | G |
| 9 | TIGRP2P130855_rs9077374 | 55804878 | G | 0.5  | 0.7143  | A |
| 9 | BICF2G630472995         | 55805008 | A | 0    | 0       | G |
| 9 | BICF2G630472997         | 55813366 | G | 0.25 | 0.07143 | C |
| 9 | BICF2P772510            | 55826254 | A | 0.25 | 0.2143  | G |
| 9 | BICF2G630473027         | 55841605 | A | 0    | 0       | C |
| 9 | BICF2G630473035         | 55847054 | C | 0    | 0       | A |
| 9 | BICF2G630473051         | 55875536 | G | 0    | 0       | A |
| 9 | BICF2G630473074         | 55892669 | G | 0    | 0       | A |
| 9 | BICF2G630473095         | 55905283 | A | 0    | 0       | G |
| 9 | BICF2S23645842          | 55915302 | A | 0    | 0       | G |
| 9 | BICF2G630473128         | 55927243 | A | 1    | 1       | G |
| 9 | BICF2G630473166         | 55954563 | A | 0.75 | 0.7143  | G |
| 9 | BICF2G630473183         | 55963252 | A | 0.75 | 0.7143  | G |
| 9 | BICF2G630473198         | 55971811 | G | 0.75 | 0.7143  | A |
| 9 | BICF2P1343066           | 55987187 | G | 0.75 | 0.7143  | A |
| 9 | BICF2S23235445          | 55993904 | G | 0.5  | 0.5     | A |
| 9 | BICF2G630473223         | 56000845 | A | 0    | 0       | G |
| 9 | BICF2G630473230         | 56005788 | A | 0    | 0       | G |
| 9 | BICF2G630473254         | 56024181 | A | 0.5  | 0.5     | G |
| 9 | BICF2P846991            | 56036812 | G | 0.5  | 0.5     | A |
| 9 | BICF2G630473270         | 56043800 | G | 0.5  | 0.5     | A |
| 9 | TIGRP2P130905_rs8497327 | 56054272 | A | 0.25 | 0.1429  | G |
| 9 | BICF2G630473286         | 56061262 | G | 0.75 | 0.6429  | A |
| 9 | BICF2G630473289         | 56071579 | A | NA   | 0.5     | G |
| 9 | BICF2P1199801           | 56094217 | G | 0    | 0       | A |
| 9 | BICF2S2336128           | 56107479 | G | 0.25 | 0.3571  | A |
| 9 | BICF2S22911164          | 56109108 | A | 0    | 0       | G |
| 9 | BICF2P224794            | 56109555 | T | 0.25 | 0.1429  | A |
| 9 | BICF2P198137            | 56130330 | G | 0.5  | 0.4286  | A |
| 9 | BICF2P877340            | 56141540 | A | 0.5  | 0.5     | G |
| 9 | TIGRP2P130939_rs9002481 | 56157845 | 0 | 0    | 0       | G |

|   |                         |          |   |      |        |   |
|---|-------------------------|----------|---|------|--------|---|
| 9 | BICF2S23328625          | 56165421 | A | 0.25 | 0.2143 | C |
| 9 | TIGRP2P130942_rs8987843 | 56169240 | G | 0.75 | 0.7857 | A |
| 9 | BICF2P1412893           | 56197414 | G | 0    | 0      | A |
| 9 | BICF2P1144818           | 56203597 | G | 0    | 0      | A |
| 9 | BICF2P83592             | 56217090 | A | 0.25 | 0.2143 | G |
| 9 | BICF2P1247992           | 56224332 | A | 0.25 | 0.2143 | G |
| 9 | BICF2P271838            | 56241939 | A | 0.25 | 0.2143 | G |
| 9 | TIGRP2P130971_rs8559231 | 56256928 | 0 | 0    | 0      | G |
| 9 | TIGRP2P130975_rs8988662 | 56258870 | 0 | 0    | 0      | A |
| 9 | TIGRP2P130977_rs8653031 | 56271113 | 0 | 0    | 0      | G |
| 9 | TIGRP2P130979_rs8817254 | 56287751 | G | 0.25 | 0.1429 | A |
| 9 | BICF2P1331932           | 56292817 | A | 0    | 0      | G |
| 9 | BICF2P1355545           | 56304951 | G | 0.25 | 0.1429 | A |
| 9 | BICF2P375985            | 56315572 | A | 0.75 | 0.6429 | G |
| 9 | BICF2S23627385          | 56338879 | 0 | 0    | 0      | C |
| 9 | BICF2S23416717          | 56351076 | A | 0.25 | 0      | G |
| 9 | BICF2P425623            | 56368674 | A | 0.75 | 0.7857 | G |
| 9 | BICF2S23243720          | 56381402 | 0 | 0    | 0      | G |
| 9 | BICF2P854739            | 56404869 | A | 0.5  | 0.3571 | C |
| 9 | BICF2P126838            | 56408465 | A | 0.5  | 0.3571 | G |
| 9 | BICF2P1341275           | 56424571 | G | 0    | 0      | A |
| 9 | BICF2P721027            | 56434134 | A | 0    | 0      | G |
| 9 | BICF2P772268            | 56434621 | A | 0.25 | 0.2857 | G |
| 9 | BICF2P1337644           | 56452169 | G | 0.25 | 0.1429 | A |
| 9 | BICF2P252703            | 56465402 | A | 0.75 | 0.8571 | C |
| 9 | BICF2P1249538           | 56485020 | C | 0.25 | 0.1429 | A |
| 9 | BICF2P1111197           | 56491969 | G | 0.75 | 0.8571 | A |
| 9 | BICF2P1372742           | 56494891 | G | 0.75 | 0.8571 | A |
| 9 | BICF2S23014602          | 56505873 | A | 0    | 0      | G |
| 9 | BICF2P599379            | 56517102 | A | 0.75 | 0.8571 | G |
| 9 | BICF2P1205809           | 56526350 | A | 0.75 | 0.8571 | C |
| 9 | BICF2P1095005           | 56535611 | G | 1    | 0.8571 | A |
| 9 | BICF2P1111536           | 56549452 | C | 0.75 | 0.8571 | G |
| 9 | BICF2P1163077           | 56561650 | A | 0.75 | 0.8571 | G |
| 9 | BICF2P717707            | 56570254 | A | 0.75 | 0.8571 | G |
| 9 | BICF2P1267047           | 56578961 | G | 1    | 1      | A |
| 9 | BICF2S2311089           | 56581605 | 0 | 0    | 0      | G |
| 9 | BICF2P938441            | 56598035 | C | 0.75 | 0.6429 | G |
| 9 | BICF2P65993             | 56631609 | A | 0.5  | 0.5    | G |
| 9 | BICF2P1447068           | 56639389 | A | 0.5  | 0.5    | G |
| 9 | BICF2S2329700           | 56641553 | A | 0    | 0      | G |
| 9 | BICF2P1084              | 56660144 | A | 0.25 | 0.3571 | G |
| 9 | BICF2P163818            | 56679950 | A | 0.5  | 0.6429 | C |
| 9 | TIGRP2P131016_rs8758223 | 56698576 | 0 | 0    | 0      | G |
| 9 | BICF2P1418545           | 56708849 | 0 | 0    | 0      | G |
| 9 | BICF2P2433              | 56758392 | 0 | 0    | 0      | C |
| 9 | BICF2P321059            | 56773865 | 0 | 0    | 0      | G |

|   |                         |          |   |      |        |   |
|---|-------------------------|----------|---|------|--------|---|
| 9 | BICF2P154580            | 56783385 | A | NA   | 0.7    | C |
| 9 | BICF2P1265894           | 56792382 | G | 1    | 0.8571 | A |
| 9 | BICF2P259507            | 56793936 | G | 0.75 | 0.9167 | A |
| 9 | BICF2S23740147          | 56799923 | C | 0.25 | 0.1429 | A |
| 9 | BICF2P1244573           | 56815068 | A | 0.5  | 0.3571 | G |
| 9 | BICF2S23617873          | 56829350 | A | 0.25 | 0.2143 | G |
| 9 | BICF2P856172            | 56834230 | C | 0.25 | 0.2143 | A |
| 9 | BICF2P1279633           | 56855202 | A | 1    | 1      | C |
| 9 | BICF2P639917            | 56857040 | C | 0    | 0      | G |
| 9 | BICF2P565684            | 56878470 | A | 0.25 | 0.1429 | G |
| 9 | BICF2P565681            | 56878671 | A | 0.25 | 0.1429 | G |
| 9 | BICF2P979121            | 56882346 | G | 0.25 | 0.1429 | A |
| 9 | BICF2P728839            | 56887902 | A | 0.75 | 0.8571 | G |
| 9 | BICF2P1462669           | 56896223 | G | 0    | 0      | A |
| 9 | BICF2P184911            | 56904403 | A | 0    | 0      | G |
| 9 | TIGRP2P131021_rs8701275 | 56932769 | 0 | 0    | 0      | G |
| 9 | BICF2P157666            | 56954383 | G | 0.25 | 0.2143 | A |
| 9 | BICF2S236831            | 56960842 | A | 0.25 | 0.2143 | G |
| 9 | BICF2S2346755           | 56981942 | G | 0.25 | 0.2143 | A |
| 9 | BICF2S23736443          | 56998520 | A | 0    | 0      | G |
| 9 | BICF2P1033788           | 57007135 | A | 0.5  | 0.5714 | G |
| 9 | BICF2S2327824           | 57017170 | A | 0.25 | 0.2857 | G |
| 9 | BICF2P1031563           | 57035400 | A | 0    | 0      | G |
| 9 | BICF2P1031564           | 57035595 | A | 0.5  | 0.3571 | T |
| 9 | BICF2S2298442           | 57046184 | G | 0    | 0      | A |
| 9 | BICF2P488147            | 57057550 | A | 0.25 | 0.2143 | G |
| 9 | BICF2P505461            | 57085178 | G | 0.25 | 0.1429 | A |
| 9 | TIGRP2P131025_rs8778053 | 57093074 | 0 | 0    | 0      | A |
| 9 | BICF2S2373714           | 57106857 | G | 0    | 0      | A |
| 9 | BICF2P535283            | 57114581 | A | 0.25 | 0.2143 | T |
| 9 | BICF2S23155810          | 57123696 | A | 0    | 0      | G |
| 9 | BICF2P1131880           | 57141686 | C | 0.25 | 0.1429 | G |
| 9 | BICF2P1069837           | 57153163 | A | 0.25 | 0.1429 | G |
| 9 | BICF2P1436750           | 57163178 | 0 | 0    | 0      | A |
| 9 | BICF2P1303462           | 57231778 | C | 0.5  | 0.5714 | A |
| 9 | BICF2S23138824          | 57237442 | C | 0.25 | 0.2857 | A |
| 9 | BICF2P311912            | 57248497 | G | 0.25 | 0.2143 | A |
| 9 | BICF2P175757            | 57273986 | 0 | 0    | 0      | A |
| 9 | BICF2P663247            | 57281932 | G | 0.75 | 0.7857 | A |
| 9 | BICF2S23341467          | 57311859 | G | 0.25 | 0.2143 | A |
| 9 | BICF2P959637            | 57317211 | C | 0.25 | 0.2143 | G |
| 9 | BICF2P64569             | 57338918 | A | 0.5  | 0.5714 | G |
| 9 | BICF2S2344489           | 57339906 | A | 0.5  | 0.5714 | G |
| 9 | BICF2S23551337          | 57355604 | A | 0    | 0      | G |
| 9 | BICF2S23340470          | 57375986 | A | 0    | 0      | G |
| 9 | BICF2P484113            | 57388959 | 0 | 0    | 0      | G |
| 9 | BICF2S23355956          | 57404331 | A | 0.25 | 0.3571 | G |

|   |                         |          |   |      |        |   |
|---|-------------------------|----------|---|------|--------|---|
| 9 | BICF2S23227056          | 57410511 | C | 0.5  | 0.6429 | A |
| 9 | TIGRP2P131035_rs9084195 | 57420634 | 0 | 0    | 0      | G |
| 9 | BICF2S2306823           | 57436351 | G | 0    | 0      | A |
| 9 | BICF2S23416018          | 57450341 | A | 0    | 0      | G |
| 9 | BICF2P583320            | 57464468 | A | 0.5  | 0.5    | G |
| 9 | BICF2P1248244           | 57467036 | G | 0.5  | 0.5    | A |
| 9 | BICF2G630473300         | 57489650 | G | 0.5  | 0.6429 | A |
| 9 | BICF2G630473310         | 57500319 | A | 0.5  | 0.4286 | G |
| 9 | BICF2G630473312         | 57505233 | C | 0.25 | 0.2857 | A |
| 9 | BICF2P580754            | 57518654 | A | 0.75 | 0.6429 | G |
| 9 | BICF2G630473329         | 57535048 | A | 0    | 0      | G |
| 9 | BICF2P766944            | 57555147 | C | 0.5  | 0.4286 | A |
| 9 | BICF2G630473345         | 57564211 | A | 0    | 0.2143 | G |
| 9 | BICF2S23639106          | 57574398 | G | 0.5  | 0.5    | A |
| 9 | BICF2G630473353         | 57591234 | G | 0.25 | 0.2857 | A |
| 9 | BICF2G630473380         | 57601169 | G | 0.5  | 0.6429 | A |
| 9 | BICF2G630473388         | 57607317 | G | 0.25 | 0.2857 | A |
| 9 | BICF2P1284597           | 57623230 | A | 0.25 | 0.1429 | G |
| 9 | BICF2G630473393         | 57626311 | A | 0.25 | 0.2143 | G |
| 9 | BICF2G630473394         | 57630256 | G | 0.5  | 0.5    | A |
| 9 | BICF2S2342742           | 57647751 | A | 0.5  | 0.5    | G |
| 9 | BICF2G630473404         | 57655708 | A | 0    | 0      | G |
| 9 | BICF2G630473412         | 57662062 | A | 0.75 | 0.7143 | C |
| 9 | BICF2G630473430         | 57668121 | A | 0.5  | 0.5    | G |
| 9 | BICF2G630473441         | 57672655 | A | 0.25 | 0.3571 | G |
| 9 | BICF2S23658887          | 57700616 | C | 0.5  | 0.5714 | G |
| 9 | BICF2G630473449         | 57713051 | G | 0.25 | 0.2143 | A |
| 9 | BICF2G630473454         | 57725671 | A | 0.25 | 0.2143 | G |
| 9 | BICF2S233562            | 57739102 | C | 0.25 | 0.3571 | A |
| 9 | BICF2P659692            | 57752264 | A | 0.5  | 0.3571 | G |
| 9 | BICF2G630473462         | 57758939 | A | 0.5  | 0.3571 | G |
| 9 | BICF2S23422745          | 57772294 | G | 0.25 | 0.2857 | A |
| 9 | BICF2G630473486         | 57784094 | G | 0.5  | 0.3571 | A |
| 9 | BICF2P1359537           | 57811324 | 0 | 0    | 0      | A |
| 9 | BICF2S23553126          | 57823485 | T | 0    | 0      | A |
| 9 | BICF2S23643149          | 57841697 | G | 0    | 0      | A |
| 9 | BICF2S23244968          | 57853166 | A | 0    | 0      | G |
| 9 | BICF2G630473518         | 57866371 | C | 1    | 1      | A |
| 9 | BICF2G630473524         | 57872609 | A | 1    | 1      | G |
| 9 | BICF2G630473547         | 57882238 | A | 0    | 0      | C |
| 9 | BICF2G630473563         | 57891497 | A | 1    | 1      | C |
| 9 | BICF2G630473582         | 57904969 | G | 1    | 1      | A |
| 9 | BICF2G630473617         | 57953651 | A | 0    | 0      | G |
| 9 | BICF2S23657763          | 57967065 | 0 | 0    | 0      | G |
| 9 | BICF2G630473618         | 57976560 | A | 0.25 | 0.1429 | C |
| 9 | BICF2G630473641         | 58001513 | A | 0.25 | 0.1429 | G |
| 9 | BICF2G630473653         | 58008872 | A | 0.25 | 0.1429 | G |

|   |                         |          |   |      |        |   |
|---|-------------------------|----------|---|------|--------|---|
| 9 | BICF2G630473675         | 58027552 | A | 0.5  | 0.3571 | G |
| 9 | BICF2P1295530           | 58031172 | 0 | 0    | 0      | C |
| 9 | BICF2G630473680         | 58043176 | A | 0.5  | 0.3333 | G |
| 9 | BICF2G630473683         | 58054850 | C | 1    | 1      | G |
| 9 | BICF2G630473690         | 58063839 | G | 1    | 1      | A |
| 9 | BICF2G630473695         | 58076131 | C | 1    | 1      | A |
| 9 | BICF2G630473702         | 58081278 | G | 1    | 1      | A |
| 9 | BICF2G630473722         | 58095179 | A | 1    | 1      | G |
| 9 | BICF2G630473731         | 58102390 | A | 0.75 | 0.6667 | C |
| 9 | BICF2G630473744         | 58116208 | A | 0    | 0      | G |
| 9 | BICF2G630473756         | 58128477 | A | 0    | 0      | C |
| 9 | BICF2G630473766         | 58138534 | A | 0    | 0      | G |
| 9 | BICF2S2371549           | 58147917 | C | 0.75 | 0.8571 | A |
| 9 | BICF2P894196            | 58189768 | G | 0.75 | 0.6429 | A |
| 9 | BICF2G630473811         | 58201021 | A | 0.5  | 0.3571 | G |
| 9 | BICF2P949228            | 58212457 | A | 0    | 0      | G |
| 9 | BICF2S23614905          | 58229061 | G | 0.5  | 0.6429 | A |
| 9 | TIGRP2P131042_rs8812223 | 58238031 | 0 | 0    | 0      | G |
| 9 | BICF2G630473845         | 58268581 | A | 0    | 0      | G |
| 9 | BICF2P1374572           | 58285925 | A | 0    | 0      | G |
| 9 | BICF2P1117927           | 58308974 | G | 0    | 0      | A |
| 9 | BICF2S23022035          | 58324196 | A | 0    | 0      | G |
| 9 | BICF2G630473927         | 58340052 | A | 0    | 0      | G |
| 9 | BICF2G630473936         | 58346118 | A | 0    | 0      | G |
| 9 | BICF2G630473940         | 58354303 | C | 0    | 0      | A |
| 9 | G562f39S144             | 58381616 | G | 0    | 0      | A |
| 9 | TIGRP2P131059_rs8798282 | 58396640 | 0 | 0    | 0      | A |
| 9 | BICF2S24317651          | 58402907 | A | 0    | 0      | G |
| 9 | BICF2P1359504           | 58416007 | 0 | 0    | 0      | C |
| 9 | BICF2P603519            | 58442837 | A | 0.75 | 0.7857 | G |
| 9 | BICF2G630473948         | 58451190 | G | 0    | 0      | A |
| 9 | BICF2S23544734          | 58457706 | A | 0.5  | 0.5    | G |
| 9 | BICF2G630473973         | 58472551 | A | 0.25 | 0.2857 | G |
| 9 | BICF2G630473981         | 58487289 | A | 0.75 | 0.7143 | G |
| 9 | BICF2G630473995         | 58500167 | A | 0.25 | 0.2857 | C |
| 9 | BICF2P727918            | 58506901 | A | 0    | 0      | G |
| 9 | BICF2P306890            | 58519763 | A | 0.5  | 0.5    | G |
| 9 | BICF2S23236317          | 58527653 | G | 0.25 | 0.2857 | C |
| 9 | BICF2P333641            | 58538700 | A | 1    | 1      | G |
| 9 | BICF2P472772            | 58556154 | G | 0    | 0      | A |
| 9 | BICF2G630474008         | 58567410 | A | 0.25 | 0.2143 | G |
| 9 | BICF2S23423930          | 58573646 | C | 0.75 | 0.7857 | G |
| 9 | BICF2G630474028         | 58583494 | A | 0.75 | 0.7857 | G |
| 9 | BICF2P180918            | 58596040 | A | 0    | 0      | G |
| 9 | BICF2G630474039         | 58597924 | A | 0    | 0      | G |
| 9 | BICF2G630474041         | 58602557 | G | 0.25 | 0.2857 | A |
| 9 | BICF2G630474054         | 58612520 | C | 0.75 | 0.7143 | A |



|   |                 |          |   |      |        |   |
|---|-----------------|----------|---|------|--------|---|
| 9 | BICF2G630474068 | 58620902 | G | 1    | 1      | A |
| 9 | BICF2G630474074 | 58628342 | G | 0    | 0      | A |
| 9 | BICF2G630474083 | 58644271 | A | 0.25 | 0.2143 | G |
| 9 | BICF2P927295    | 58655878 | A | 0    | 0      | G |
| 9 | BICF2P562918    | 58664036 | 0 | 0    | 0      | G |
| 9 | BICF2G630474100 | 58679972 | G | 0    | 0      | A |
| 9 | BICF2P915257    | 58692284 | G | 0    | 0      | A |
| 9 | BICF2G630474124 | 58705911 | A | 0    | 0      | G |
| 9 | BICF2S2311814   | 58709408 | A | 0    | 0      | G |
| 9 | BICF2G630474135 | 58719409 | A | 0    | 0      | G |
| 9 | BICF2G630474137 | 58732622 | A | 0    | 0      | G |
| 9 | BICF2P93403     | 58748334 | A | 0    | 0      | G |
| 9 | BICF2P521959    | 58762083 | G | 0.25 | 0.2143 | A |
| 9 | BICF2P966850    | 58766461 | G | 0.25 | 0.2143 | A |
| 9 | BICF2P874582    | 58779689 | A | 0.25 | 0.2143 | G |
| 9 | BICF2G630474163 | 58791653 | A | 0    | 0      | T |
| 9 | BICF2G630474167 | 58800094 | G | 0    | 0      | A |
| 9 | BICF2G630474183 | 58813964 | A | 0    | 0      | G |
| 9 | BICF2P1040103   | 58820717 | G | 0    | 0      | A |
| 9 | BICF2P438595    | 58844577 | A | 0    | 0      | G |
| 9 | BICF2P274662    | 58846265 | G | 0    | 0      | A |
| 9 | BICF2G630474227 | 58860194 | G | 0.5  | 0.5    | A |
| 9 | BICF2G630474236 | 58866769 | G | 0.25 | 0.2143 | A |
| 9 | BICF2G630474240 | 58877035 | A | 0    | 0      | G |
| 9 | BICF2S2361054   | 58888536 | A | 0    | 0      | G |
| 9 | BICF2S23042844  | 58900272 | A | 0    | 0      | C |
| 9 | BICF2S23427352  | 58915372 | G | 0.5  | 0.5    | A |
| 9 | BICF2S23450469  | 58935631 | A | 0    | 0      | G |
| 9 | BICF2S23017379  | 58938069 | A | 0.5  | 0.5    | G |
| 9 | BICF2P550162    | 58953028 | A | 0.25 | 0.2143 | G |
| 9 | BICF2P714176    | 58972961 | G | 0.25 | 0.2143 | A |
| 9 | BICF2G630474276 | 58990233 | G | 0    | 0      | A |
| 9 | BICF2P799861    | 59017998 | A | 0    | 0      | G |
| 9 | BICF2P512209    | 59025120 | A | 0    | 0      | G |
| 9 | BICF2P104318    | 59029692 | A | 0.5  | 0.5    | G |
| 9 | BICF2P721587    | 59042656 | A | 0.5  | 0.5    | C |
| 9 | BICF2P76967     | 59060679 | G | 0.5  | 0.5    | A |
| 9 | BICF2P76963     | 59061100 | A | 0.5  | 0.5    | G |
| 9 | BICF2S23729828  | 59070309 | A | 0.5  | 0.5    | G |
| 9 | BICF2P586637    | 59095558 | A | 0.5  | 0.5    | G |
| 9 | BICF2S23763075  | 59107808 | A | 0.5  | 0.5    | G |
| 9 | BICF2P513339    | 59111854 | A | 0.5  | 0.3571 | C |
| 9 | BICF2G630474339 | 59123218 | A | 0    | 0      | G |
| 9 | BICF2G630474366 | 59141193 | G | 0    | 0      | A |
| 9 | BICF2G630474382 | 59152097 | A | 0    | 0      | G |
| 9 | BICF2G630474394 | 59156413 | G | 0.25 | 0.2857 | A |
| 9 | BICF2P467284    | 59194294 | C | 0.25 | 0.1429 | A |

|   |                         |          |   |      |        |   |
|---|-------------------------|----------|---|------|--------|---|
| 9 | BICF2G630474427         | 59208656 | A | 0    | 0      | G |
| 9 | BICF2G630474452         | 59218056 | A | 0    | 0      | C |
| 9 | BICF2P55775             | 59232964 | C | 0.25 | 0.2857 | A |
| 9 | BICF2G630474497         | 59237078 | G | 0.75 | 0.6429 | A |
| 9 | BICF2P150106            | 59248920 | A | 0    | 0      | G |
| 9 | BICF2G630474505         | 59262298 | G | 0.25 | 0.2143 | A |
| 9 | BICF2G630474517         | 59273775 | G | 0.25 | 0.2143 | A |
| 9 | BICF2S24117588          | 59283628 | C | 0.25 | 0.3571 | A |
| 9 | BICF2S23657684          | 59300694 | 0 | 0    | 0      | G |
| 9 | BICF2P118984            | 59309991 | A | 0.5  | 0.6429 | G |
| 9 | TIGRP2P131087_rs8678473 | 59317218 | 0 | 0    | 0      | A |
| 9 | BICF2G630474519         | 59331052 | 0 | 0    | 0      | G |
| 9 | BICF2S23764509          | 59349834 | G | 0.5  | 0.6429 | A |
| 9 | BICF2G630474527         | 59361628 | A | 0.75 | 0.6429 | G |
| 9 | BICF2G630474528         | 59365631 | G | 0.5  | 0.3571 | A |
| 9 | BICF2G630474547         | 59381521 | A | 0.5  | 0.3571 | G |
| 9 | BICF2G630474560         | 59393447 | C | 0.5  | 0.3571 | A |
| 9 | BICF2G630474576         | 59406236 | A | 0.5  | 0.3571 | G |
| 9 | BICF2G630474578         | 59411182 | A | 0.5  | 0.3571 | G |
| 9 | BICF2G630474582         | 59430150 | A | 0.25 | 0.2857 | G |
| 9 | BICF2G630474587         | 59436185 | G | 0.25 | 0.2857 | A |
| 9 | BICF2G630474588         | 59452115 | G | 0.25 | 0.2857 | C |
| 9 | BICF2G630474590         | 59462126 | G | 0.25 | 0.2857 | A |
| 9 | BICF2G630474606         | 59473455 | G | 0    | 0      | A |
| 9 | BICF2G630474616         | 59483554 | 0 | 0    | 0      | A |
| 9 | BICF2G630474620         | 59495629 | A | 0    | 0      | G |
| 9 | BICF2G630474628         | 59510175 | A | 0    | 0      | G |
| 9 | BICF2G630474637         | 59518447 | A | 0.25 | 0.2857 | G |
| 9 | BICF2P1271166           | 59542583 | 0 | 0    | 0      | G |
| 9 | BICF2P119449            | 59552285 | A | 0.25 | 0.3571 | G |
| 9 | BICF2S23526488          | 59564592 | G | 0.25 | 0.1667 | A |
| 9 | BICF2G630474650         | 59580952 | A | 0.25 | 0.2857 | G |
| 9 | BICF2P1303332           | 59595792 | 0 | 0    | 0      | A |
| 9 | TIGRP2P131092_rs9039946 | 59615724 | 0 | 0    | 0      | C |
| 9 | BICF2S2362679           | 59634508 | A | 0.5  | 0.3333 | G |
| 9 | BICF2G630474655         | 59653597 | A | 0.25 | 0.3571 | G |
| 9 | BICF2S2376082           | 59666049 | A | 1    | 1      | G |
| 9 | BICF2P357957            | 59707459 | G | 0.5  | 0.3571 | A |
| 9 | BICF2P357961            | 59709250 | C | 0.5  | 0.3571 | A |
| 9 | BICF2P603881            | 59727741 | G | 0.75 | 0.8    | A |
| 9 | BICF2P943190            | 59734028 | A | 0.5  | 0.5    | G |
| 9 | BICF2G630474660         | 59763646 | G | 0.5  | 0.3571 | A |
| 9 | BICF2G630474664         | 59771940 | A | 0.75 | 0.6429 | G |
| 9 | BICF2G630474668         | 59780642 | A | 0.75 | 0.6429 | G |
| 9 | BICF2P608413            | 59794260 | A | 0    | 0      | G |
| 9 | BICF2G630474680         | 59805567 | C | 0.75 | 0.6429 | A |
| 9 | BICF2G630474690         | 59818627 | G | 0.25 | 0.2857 | A |

|   |                         |          |   |      |        |   |
|---|-------------------------|----------|---|------|--------|---|
| 9 | BICF2G630474699         | 59823085 | A | 0.25 | 0.2857 | G |
| 9 | BICF2G630474713         | 59841439 | A | 0    | 0      | G |
| 9 | BICF2G630474786         | 59866132 | A | 0    | 0      | G |
| 9 | BICF2G630474791         | 59869962 | A | 0    | 0      | C |
| 9 | BICF2S2378654           | 59881449 | G | 0.25 | 0.2857 | C |
| 9 | BICF2P1143183           | 59895604 | G | 0.25 | 0.2857 | A |
| 9 | BICF2G630474812         | 59901027 | G | 0    | 0      | A |
| 9 | TIGRP2P131105_rs9107786 | 59904745 | 0 | 0    | 0      | G |
| 9 | BICF2G630474819         | 59919788 | C | 0    | 0      | A |
| 9 | BICF2P1361507           | 59936544 | 0 | 0    | 0      | G |
| 9 | BICF2G630474832         | 59942998 | 0 | 0    | 0      | G |
| 9 | BICF2G630474839         | 59959479 | A | 0.25 | 0.2143 | G |
| 9 | BICF2G630474841         | 59966111 | A | 0.25 | 0.2143 | G |
| 9 | BICF2G630474842         | 59973945 | G | 0.75 | 0.6429 | A |
| 9 | BICF2G630474853         | 59991734 | G | 0.25 | 0.2857 | A |
| 9 | BICF2G630474858         | 59996893 | A | 0.25 | 0.2857 | G |
| 9 | BICF2G630474874         | 60012660 | A | 0.25 | 0.2857 | C |
| 9 | BICF2G630474884         | 60018951 | G | 0    | 0      | A |
| 9 | BICF2G630474896         | 60035477 | G | 0    | 0      | A |
| 9 | BICF2G630474904         | 60051591 | C | 0.25 | 0.1429 | A |
| 9 | BICF2G630474911         | 60075329 | A | 0.25 | 0.1429 | G |
| 9 | BICF2G630474921         | 60082339 | A | 0.25 | 0.1429 | G |
| 9 | BICF2G630474923         | 60083905 | A | 0.25 | 0.1429 | G |
| 9 | BICF2G630474981         | 60109650 | A | 0.25 | 0.1429 | G |
| 9 | BICF2G630474986         | 60111135 | C | 0.25 | 0.1429 | A |
| 9 | BICF2G630475002         | 60132468 | G | 0.25 | 0      | A |
| 9 | BICF2P676203            | 60138150 | 0 | 0    | 0      | C |
| 9 | BICF2G630475010         | 60150511 | A | 0.5  | 0.1667 | G |
| 9 | BICF2G630475021         | 60164515 | G | 0.5  | 0.4286 | A |
| 9 | BICF2G630475035         | 60173097 | A | 0.25 | 0.1429 | G |
| 9 | BICF2G630475043         | 60179669 | G | 0.25 | 0.1429 | A |
| 9 | BICF2G630475068         | 60198661 | G | 0.25 | 0.1667 | A |
| 9 | BICF2G630475078         | 60204605 | G | 0    | 0.1429 | A |
| 9 | BICF2G630475098         | 60220055 | A | 0.25 | 0.1429 | G |
| 9 | BICF2G630475115         | 60230221 | A | 0.5  | 0.6429 | G |
| 9 | BICF2G630475124         | 60240320 | G | 0.25 | 0.1429 | A |
| 9 | BICF2S23118608          | 60251307 | G | 0.75 | 0.6429 | A |
| 9 | BICF2G630475164         | 60269894 | G | 0.25 | 0.2857 | A |
| 9 | BICF2G630475168         | 60273060 | A | 0.5  | 0.6429 | G |
| 9 | BICF2S23222578          | 60287933 | G | 0.25 | 0.3571 | A |
| 9 | BICF2P1271033           | 60297023 | G | 0.5  | 0.6429 | A |
| 9 | BICF2P992597            | 60313580 | A | 0    | 0      | C |
| 9 | BICF2P674532            | 60330198 | 0 | 0    | 0      | T |
| 9 | BICF2P1444168           | 60352880 | A | 0.5  | 0.5    | G |
| 9 | BICF2P473799            | 60369052 | A | 0    | 0      | G |
| 9 | BICF2S23213010          | 60379177 | A | 0.75 | 0.7857 | G |
| 9 | BICF2G630475174         | 60417635 | G | 0    | 0      | A |

|   |                         |          |   |      |        |   |
|---|-------------------------|----------|---|------|--------|---|
| 9 | BICF2G630475183         | 60421094 | A | 0.25 | 0.2857 | G |
| 9 | BICF2G630475225         | 60443003 | A | 0.25 | 0.2857 | G |
| 9 | BICF2G630475232         | 60446819 | A | 0.25 | 0.2857 | G |
| 9 | BICF2G630475240         | 60447678 | G | 0.25 | 0.2857 | A |
| 9 | BICF2G630475254         | 60450997 | A | 0.5  | 0.6429 | G |
| 9 | BICF2G630475267         | 60455730 | G | 0.25 | 0.2857 | A |
| 9 | BICF2G630475311         | 60477094 | A | 0.25 | 0.2857 | C |
| 9 | BICF2G630475317         | 60480041 | A | 0.25 | 0.2857 | G |
| 9 | BICF2G630475333         | 60492717 | A | 0.25 | 0.2857 | C |
| 9 | BICF2G630475351         | 60503278 | A | 0    | 0      | G |
| 9 | BICF2G630475372         | 60526735 | A | 0    | 0      | G |
| 9 | BICF2S23627750          | 60548128 | A | 0.5  | 0.6429 | G |
| 9 | BICF2S23650465          | 60576798 | A | 0    | 0      | G |
| 9 | BICF2P1252570           | 60588760 | 0 | 0    | 0      | A |
| 9 | BICF2P374221            | 60598549 | A | 0.5  | 0.6429 | G |
| 9 | BICF2P788102            | 60609924 | G | 0.5  | 0.6429 | A |
| 9 | BICF2P44267             | 60630598 | G | 0.5  | 0.6429 | A |
| 9 | BICF2P788975            | 60644110 | A | 0.5  | 0.6429 | G |
| 9 | BICF2P1033448           | 60666128 | A | 0.5  | 0.6429 | G |
| 9 | BICF2P223161            | 60684987 | G | 0.5  | 0.6429 | A |
| 9 | BICF2P819460            | 60691650 | A | 0.5  | 0.6667 | G |
| 9 | BICF2P744833            | 60697483 | A | 0.5  | 0.6429 | G |
| 9 | BICF2P236584            | 60711605 | A | 0.5  | 0.6429 | G |
| 9 | BICF2S23451571          | 60739837 | C | 0.5  | 0.6429 | A |
| 9 | BICF2S24116623          | 60750685 | 0 | 0    | 0      | A |
| 9 | BICF2G630475390         | 60760574 | A | 0.25 | 0.2857 | G |
| 9 | BICF2G630475403         | 60774146 | A | 0.25 | 0.2857 | G |
| 9 | BICF2G630475425         | 60780780 | A | 0.25 | 0.2143 | G |
| 9 | BICF2P1236981           | 60789325 | 0 | 0    | 0      | A |
| 9 | BICF2P1394901           | 60800749 | 0 | 0    | 0      | A |
| 9 | BICF2P794156            | 60835896 | 0 | 0    | 0      | G |
| 9 | BICF2S2296546           | 60868879 | A | 0    | 0      | C |
| 9 | BICF2P478221            | 60921856 | 0 | 0    | 0      | A |
| 9 | TIGRP2P131125_rs8504521 | 60936664 | 0 | 0    | 0      | G |
| 9 | BICF2P1110530           | 60938589 | G | 0    | 0      | A |
| 9 | BICF2S22932540          | 60957697 | A | 0    | 0      | G |
| 9 | BICF2P843982            | 60972108 | 0 | 0    | 0      | A |
| 9 | BICF2P831739            | 60992525 | C | 0.25 | 0.2857 | A |
| 9 | BICF2G630475462         | 60996738 | A | 0.25 | 0.2857 | G |
| 9 | BICF2G630475471         | 61008816 | A | 0.25 | 0.2857 | G |
| 9 | BICF2G630475489         | 61020685 | G | 0.25 | 0.2857 | A |
| 9 | BICF2G630475504         | 61033184 | A | 0.25 | 0.2857 | G |
| 9 | BICF2S23427549          | 61048528 | A | 0    | 0.25   | G |
| 9 | BICF2G630475547         | 61081601 | A | 0.75 | 0.7857 | G |
| 9 | BICF2G630475569         | 61090623 | A | 0    | 0      | G |
| 9 | BICF2S22949677          | 61104205 | G | 0.25 | 0.2857 | A |
| 9 | BICF2G630475587         | 61120051 | G | 0.25 | 0.2857 | C |

|   |                         |          |   |      |        |   |
|---|-------------------------|----------|---|------|--------|---|
| 9 | BICF2G630475589         | 61130438 | C | 0.25 | 0.2857 | A |
| 9 | BICF2P219066            | 61147779 | G | 0.25 | 0.2143 | A |
| 9 | BICF2G630475601         | 61165936 | G | 0    | 0      | A |
| 9 | BICF2G630475607         | 61179918 | A | 0    | 0      | G |
| 9 | BICF2G630475612         | 61184466 | A | 0.25 | 0.1429 | G |
| 9 | BICF2G630475616         | 61187625 | A | 0.5  | 0.5714 | C |
| 9 | BICF2G630475631         | 61208532 | A | 0    | 0      | G |
| 9 | BICF2G630475642         | 61216454 | G | 0.25 | 0.2143 | A |
| 9 | BICF2P401276            | 61233355 | G | 0.75 | 0.7143 | A |
| 9 | BICF2P860518            | 61246641 | A | 0.5  | 0.5714 | G |
| 9 | BICF2S22917420          | 61257868 | G | 0.75 | 0.7143 | A |
| 9 | BICF2P879578            | 61279690 | 0 | 0    | 0      | G |
| 9 | BICF2G630475701         | 61287467 | G | 0.5  | 0.6429 | A |
| 9 | BICF2G630475721         | 61302357 | C | 0.5  | 0.6429 | A |
| 9 | BICF2G630475754         | 61318277 | G | 0.5  | 0.6667 | A |
| 9 | BICF2G630475781         | 61334682 | G | 0.5  | 0.6429 | A |
| 9 | BICF2G630475802         | 61352236 | A | 0.5  | 0.6429 | G |
| 9 | BICF2G630475813         | 61363708 | G | 0.5  | 0.6429 | A |
| 9 | BICF2G630475821         | 61367136 | C | 1    | 1      | A |
| 9 | BICF2G630475828         | 61380350 | 0 | 0    | 0      | G |
| 9 | BICF2G630475834         | 61392293 | A | 0.5  | 0.6429 | G |
| 9 | BICF2G630475843         | 61403557 | C | 0.5  | 0.6429 | A |
| 9 | BICF2G630475850         | 61429180 | A | 0.5  | 0.6429 | G |
| 9 | BICF2S23614871          | 61438740 | A | 0    | 0      | G |
| 9 | BICF2P841367            | 61458059 | 0 | 0    | 0      | G |
| 9 | BICF2S24510428          | 61480722 | C | 0    | 0      | A |
| 9 | BICF2P1288572           | 61506480 | G | 0.5  | 0.3571 | A |
| 9 | BICF2G630475869         | 61518474 | G | 0    | 0      | A |
| 9 | BICF2G630475883         | 61535047 | T | 0.5  | 0.6429 | A |
| 9 | BICF2G630475894         | 61541351 | A | 0    | 0      | G |
| 9 | BICF2G630475934         | 61560080 | A | 0    | 0      | G |
| 9 | BICF2G630475940         | 61572751 | G | 0    | 0      | A |
| 9 | BICF2G630475945         | 61583211 | A | 0    | 0      | C |
| 9 | BICF2G630475953         | 61597841 | A | 0    | 0      | G |
| 9 | BICF2G630475958         | 61626885 | A | 0    | 0      | C |
| 9 | BICF2G630475968         | 61639071 | C | 0.5  | 0.3571 | A |
| 9 | BICF2G630475972         | 61644155 | G | 0    | 0      | A |
| 9 | TIGRP2P131182_rs8718582 | 61672392 | 0 | 0    | 0      | A |
| 9 | BICF2P554518            | 61731030 | A | 0    | 0      | C |
| 9 | BICF2G630476029         | 61747616 | G | 0.75 | 0.7857 | A |
| 9 | BICF2G630476041         | 61757352 | G | 0.75 | 0.7857 | A |
| 9 | BICF2G630476054         | 61770161 | A | 0.75 | 0.7857 | G |
| 9 | BICF2S23010931          | 61780156 | A | 0.75 | 0.7857 | G |
| 9 | BICF2S24512114          | 61787312 | A | 0.25 | 0.2143 | G |
| 9 | BICF2S2339425           | 61793521 | G | 0.25 | 0.1429 | A |
| 9 | BICF2P857127            | 61805790 | C | 0    | 0      | G |
| 9 | BICF2P488658            | 61822564 | G | 0    | 0      | A |

|   |                         |          |   |      |         |   |
|---|-------------------------|----------|---|------|---------|---|
| 9 | BICF2P526898            | 61827753 | A | 0.25 | 0.2143  | C |
| 9 | BICF2S23252483          | 61836459 | G | 0    | 0       | A |
| 9 | BICF2P668937            | 61859907 | G | 0.25 | 0.1429  | A |
| 9 | BICF2P1034889           | 61870656 | G | 0.25 | 0.1429  | A |
| 9 | BICF2P1219204           | 61889785 | A | 0.25 | 0.1429  | G |
| 9 | BICF2P1219205           | 61890187 | A | 0    | 0       | C |
| 9 | BICF2P1387455           | 61896425 | A | 0.25 | 0.08333 | G |
| 9 | TIGRP2P131186_rs9134849 | 61909408 | 0 | 0    | 0       | A |
| 9 | BICF2P892546            | 61922935 | 0 | 0    | 0       | G |
| 9 | BICF2P1007832           | 61947941 | A | 0.25 | 0.1429  | C |
| 9 | BICF2P1023032           | 61956409 | G | 0    | 0       | A |
| 9 | BICF2S23751854          | 61963138 | G | 0.5  | 0.3571  | A |
| 9 | BICF2P942513            | 61976428 | A | 0.75 | 0.8571  | C |
| 9 | BICF2P442659            | 61991991 | A | 0    | 0       | G |
| 9 | BICF2S23740010          | 62000971 | A | 0    | 0       | G |
| 9 | BICF2P172882            | 62011198 | C | 0.5  | 0.3571  | A |
| 9 | BICF2P577665            | 62029237 | G | 1    | 1       | A |
| 9 | BICF2P1367414           | 62035722 | G | 0.25 | 0.1429  | A |
| 9 | BICF2S2318113           | 62055077 | G | 1    | 1       | C |
| 9 | BICF2P677062            | 62065607 | A | 0.25 | 0.1429  | G |
| 9 | BICF2P1408713           | 62080310 | A | 0.5  | 0.3571  | G |
| 9 | BICF2P1125794           | 62084071 | G | 0.5  | 0.3571  | A |
| 9 | BICF2S2448388           | 62095482 | A | 0.25 | 0.1429  | G |
| 9 | TIGRP2P131205_rs8581206 | 62108795 | 0 | 0    | 0       | G |
| 9 | BICF2P479734            | 62113864 | G | 0.5  | 0.6429  | A |
| 9 | BICF2P590119            | 62132027 | T | 0    | 0       | A |
| 9 | BICF2S22947331          | 62194807 | A | 1    | 1       | C |
| 9 | BICF2P1254422           | 62221478 | A | 0.25 | 0.1429  | G |
| 9 | TIGRP2P131210_rs8815493 | 62249943 | 0 | 0    | 0       | C |
| 9 | BICF2P1184941           | 62261516 | A | 0    | 0       | G |
| 9 | BICF2P594811            | 62279072 | G | 0    | 0       | A |
| 9 | BICF2P211557            | 62296204 | A | 0.25 | 0.1429  | C |
| 9 | BICF2P111143            | 62316810 | 0 | 0    | 0       | A |
| 9 | BICF2P1137754           | 62338264 | A | 0    | 0       | G |
| 9 | BICF2P1465585           | 62349313 | G | 1    | 1       | A |
| 9 | BICF2P241925            | 62356379 | G | 1    | 1       | A |
| 9 | BICF2P275124            | 62366758 | A | 0.25 | 0.1429  | G |
| 9 | BICF2S23151173          | 62378346 | G | 0.25 | 0.1429  | A |
| 9 | BICF2P804485            | 62388016 | A | 0    | 0       | C |
| 9 | BICF2P533873            | 62419496 | A | 0    | 0       | G |
| 9 | BICF2P1354989           | 62423191 | A | 0    | 0       | G |
| 9 | BICF2P336183            | 62434222 | G | 0    | 0       | A |
| 9 | BICF2S23214162          | 62457508 | G | 0.25 | 0.08333 | A |
| 9 | BICF2S23058835          | 62485333 | A | 0.25 | 0.1429  | G |
| 9 | BICF2S22925190          | 62496655 | A | 0    | 0       | G |
| 9 | BICF2P1244919           | 62537443 | G | 0.5  | 0.6429  | A |
| 9 | BICF2S23318442          | 62550458 | A | 0.75 | 0.8571  | C |

|   |                         |          |   |      |        |   |
|---|-------------------------|----------|---|------|--------|---|
| 9 | BICF2P1035972           | 62580730 | A | 0    | 0      | T |
| 9 | BICF2P339097            | 62600155 | 0 | 0    | 0      | A |
| 9 | BICF2P711670            | 62607966 | G | 0.75 | 0.7857 | A |
| 9 | BICF2S23241552          | 62634002 | A | 0.25 | 0.1429 | G |
| 9 | BICF2P173450            | 62642373 | G | 0.25 | 0.1429 | A |
| 9 | BICF2P834997            | 62655595 | 0 | 0    | 0      | C |
| 9 | BICF2S23354605          | 62664146 | G | 0.75 | 0.8571 | A |
| 9 | BICF2P1169801           | 62676110 | G | 0.5  | 0.3571 | A |
| 9 | BICF2P444657            | 62697894 | A | 0.5  | 0.6429 | G |
| 9 | BICF2S23419992          | 62699241 | A | 0    | 0      | C |
| 9 | BICF2P275657            | 62699687 | A | 0    | 0      | G |
| 9 | BICF2P391450            | 62702099 | A | 0    | 0      | C |
| 9 | BICF2P1141392           | 62708275 | G | 0.5  | 0.3571 | A |
| 9 | BICF2P456015            | 62718791 | A | 0    | 0      | G |
| 9 | BICF2P8836              | 62721469 | A | 0.25 | 0.1429 | G |
| 9 | BICF2P138704            | 62722297 | A | 0.25 | 0.1429 | G |
| 9 | BICF2P773235            | 62742174 | A | 0    | 0      | C |
| 9 | BICF2P1317490           | 62749749 | A | 0.5  | 0.3333 | G |
| 9 | BICF2P551570            | 62766950 | G | 0    | 0      | A |
| 9 | BICF2S22939204          | 62770600 | A | 0.5  | 0.3571 | G |
| 9 | BICF2P1204317           | 62787422 | A | 0.5  | 0.6429 | G |
| 9 | BICF2S23140624          | 62820305 | G | 0    | 0      | A |
| 9 | BICF2P1150053           | 62833704 | A | 0    | 0      | G |
| 9 | BICF2P208510            | 62837413 | A | 0    | 0      | G |
| 9 | BICF2P895809            | 62850710 | A | 0    | 0      | G |
| 9 | BICF2S24411831          | 62881094 | A | 0.75 | 0.7857 | T |
| 9 | BICF2P570235            | 62885483 | G | 0.75 | 0.7857 | A |
| 9 | TIGRP2P131232_rs8560276 | 62897747 | 0 | 0    | 0      | G |
| 9 | BICF2P1275206           | 62912412 | G | 0    | 0      | A |
| 9 | BICF2P1036668           | 62933053 | C | 0    | 0      | A |
| 9 | BICF2P499479            | 62940251 | A | 0.75 | 0.7857 | G |
| 9 | BICF2S23339686          | 62952752 | G | 0.75 | 0.7857 | A |
| 9 | BICF2P451572            | 62963237 | G | 0.75 | 0.7857 | A |
| 9 | BICF2P339627            | 62975576 | 0 | 0    | 0      | A |
| 9 | BICF2P306997            | 62990047 | G | 0.75 | 0.7857 | A |
| 9 | BICF2P571018            | 63000023 | T | 0.5  | 0.75   | A |
| 9 | BICF2S23544843          | 63005850 | A | 0.75 | 0.7857 | G |
| 9 | BICF2P1315531           | 63018557 | A | 0.75 | 0.7857 | G |
| 9 | BICF2P1315529           | 63020134 | A | 0.75 | 0.7857 | G |
| 9 | BICF2P769927            | 63036553 | G | 0.75 | 0.7857 | A |
| 9 | TIGRP2P131238_rs8866377 | 63064417 | 0 | 0    | 0      | C |
| 9 | BICF2P857121            | 63066454 | C | 0.5  | 0.6429 | A |
| 9 | BICF2S23018085          | 63093866 | 0 | 0    | 0      | A |
| 9 | BICF2S23720049          | 63110070 | G | 0    | 0      | A |
| 9 | BICF2P516827            | 63136182 | A | 0.75 | 0.7857 | G |
| 9 | TIGRP2P131239_rs9249613 | 63176740 | 0 | 0    | 0      | A |
| 9 | BICF2P496854            | 63190450 | C | 0    | 0      | G |

|   |                         |          |   |      |        |   |
|---|-------------------------|----------|---|------|--------|---|
| 9 | TIGRP2P131240_rs8705366 | 63193683 | 0 | 0    | 0      | A |
| 9 | BICF2P767735            | 63211751 | A | 0    | 0      | G |
| 9 | BICF2P483675            | 63217956 | G | 0    | 0      | A |
| 9 | BICF2S23763974          | 63228598 | A | 0.75 | 0.8571 | T |
| 9 | BICF2P499260            | 63242849 | G | 0    | 0      | A |
| 9 | BICF2P688771            | 63252436 | A | 0    | 0      | G |
| 9 | BICF2P5121              | 63263215 | G | 0    | 0      | A |
| 9 | BICF2S23027638          | 63275368 | C | 0    | 0      | A |
| 9 | BICF2S2301897           | 63288552 | A | 0    | 0      | G |
| 9 | BICF2P507534            | 63305645 | A | 0    | 0      | G |
| 9 | BICF2P254905            | 63307743 | A | 0    | 0      | G |
| 9 | BICF2P274905            | 63325723 | G | 0    | 0      | A |
| 9 | BICF2P260055            | 63330521 | A | 0    | 0      | G |
| 9 | BICF2P858916            | 63347690 | A | 0.25 | 0.1429 | G |
| 9 | BICF2P745440            | 63358550 | A | 0.75 | 0.7857 | G |
| 9 | BICF2P289334            | 63365059 | A | 0    | 0      | G |
| 9 | BICF2S2375842           | 63391164 | G | 0.25 | 0.2143 | A |
| 9 | BICF2P665182            | 63399945 | G | 0.25 | 0.2143 | A |
| 9 | BICF2S2375112           | 63419693 | A | 0    | 0      | G |
| 9 | BICF2P1502710           | 63444591 | A | 0    | 0      | G |
| 9 | BICF2P1502697           | 63446795 | A | 0    | 0      | G |
| 9 | BICF2S2314648           | 63486227 | G | 0.25 | 0.2143 | A |
| 9 | BICF2S23651600          | 63501302 | A | 0.25 | 0.2143 | G |
| 9 | BICF2S23651869          | 63506784 | C | 0    | 0      | A |
| 9 | BICF2P336253            | 63527655 | G | 0.25 | 0.2143 | A |
| 9 | BICF2P164591            | 63539695 | A | 0    | 0      | G |
| 9 | BICF2P1436914           | 63552659 | A | 0    | 0      | G |
| 9 | BICF2P664023            | 63582976 | A | 0    | 0      | C |
| 9 | BICF2P188949            | 63585508 | C | 0    | 0      | A |
| 9 | BICF2P622477            | 63595485 | G | 1    | 1      | A |
| 9 | BICF2P280739            | 63616495 | A | 0.25 | 0.2143 | C |
| 9 | BICF2P273940            | 63619709 | A | 0    | 0      | G |
| 9 | BICF2P138438            | 63654209 | 0 | 0    | 0      | A |
| 9 | BICF2P788470            | 63679563 | A | 0.75 | 0.75   | G |
| 9 | BICF2S23450786          | 63694683 | G | 0.75 | 0.75   | A |
| 9 | BICF2P1377975           | 63707546 | T | 0    | 0      | A |
| 9 | BICF2P1377968           | 63710346 | A | 0    | 0      | G |
| 9 | BICF2S23729998          | 63725540 | A | 0.25 | 0.2143 | T |
| 9 | BICF2P781977            | 63731570 | G | 1    | 1      | A |
| 9 | BICF2S2376623           | 63742629 | A | 0    | 0      | G |
| 9 | BICF2S23113145          | 63751107 | G | 0    | 0      | A |
| 9 | BICF2P366822            | 63764776 | 0 | 0    | 0      | A |
| 9 | BICF2S22943825          | 63778763 | G | 1    | 1      | A |
| 9 | BICF2P815027            | 63783649 | C | 0    | 0      | A |
| 9 | BICF2S23038667          | 63793640 | A | 0    | 0      | G |
| 9 | BICF2P608382            | 63807670 | A | 0    | 0      | G |
| 9 | BICF2P230855            | 63819564 | A | 0    | 0      | G |



|   |                |          |   |      |        |   |
|---|----------------|----------|---|------|--------|---|
| 9 | BICF2P4021     | 63825860 | G | 0.25 | 0.2143 | A |
| 9 | BICF2P1065919  | 63841856 | A | 0.25 | 0.2143 | G |
| 9 | BICF2S22955558 | 63844383 | A | 0    | 0      | T |
| 9 | BICF2P531655   | 63859709 | G | 0    | 0      | C |
| 9 | BICF2P172267   | 63861430 | G | 0    | 0      | A |
| 9 | BICF2P157169   | 63878080 | G | 0    | 0      | A |
| 9 | BICF2P737404   | 63893397 | G | 0    | 0      | A |
| 9 | BICF2S23351166 | 63915400 | A | 0.75 | 0.7857 | G |
| 9 | BICF2P1426962  | 63927263 | C | 1    | 1      | A |
| 9 | BICF2P1215930  | 63940334 | G | 0.25 | 0.2143 | A |
| 9 | BICF2S23517758 | 63956195 | A | 0.25 | 0.2143 | G |
| 9 | BICF2P175089   | 63974132 | G | 0    | 0      | A |
| 9 | BICF2P1388775  | 63978201 | A | 0    | 0      | G |
| 9 | BICF2P496029   | 63989178 | G | 0.75 | 0.7857 | A |
| 9 | BICF2S23315396 | 63996464 | A | 1    | 1      | G |
| 9 | BICF2P1255162  | 64005213 | G | 0    | 0      | C |
| 9 | BICF2P1308758  | 64028163 | A | 0    | 0      | C |
| 9 | BICF2P1237291  | 64036773 | A | 0    | 0      | C |
| 9 | BICF2P75345    | 64049336 | G | 0.25 | 0.2143 | A |
| 9 | BICF2P318266   | 64067804 | 0 | 0    | 0      | C |
| 9 | BICF2S23257502 | 64079492 | A | 0.25 | 0.2143 | G |
| 9 | BICF2P503630   | 64085875 | A | 0.75 | 0.7857 | G |
| 9 | BICF2S22951498 | 64110008 | G | 1    | 1      | A |
| 9 | BICF2P762001   | 64113986 | G | 0    | 0      | A |
| 9 | BICF2P749766   | 64114906 | A | 0    | 0      | G |
| 9 | BICF2P1076319  | 64135387 | G | 1    | 1      | A |
| 9 | BICF2S23013098 | 64154311 | G | 1    | 1      | A |
| 9 | BICF2S2343839  | 64159693 | A | 0    | 0      | G |
| 9 | BICF2S23143582 | 64192318 | A | 1    | 1      | G |
| 9 | BICF2S23313343 | 64215439 | A | 1    | 1      | G |
| 9 | BICF2S2303872  | 64222745 | A | 0    | 0      | G |
| 9 | BICF2S2364920  | 64236590 | G | 0    | 0      | A |
| 9 | BICF2S23033667 | 64249008 | G | 0.25 | 0.3571 | A |
| 9 | BICF2P500920   | 64261863 | G | 0    | 0      | C |
| 9 | BICF2P1273502  | 64263398 | C | 0.25 | 0.3571 | A |
| 9 | BICF2P365656   | 64280627 | C | 0.25 | 0.3571 | A |
| 9 | BICF2P1056460  | 64284397 | A | 0    | 0      | T |
| 9 | BICF2P271019   | 64286178 | A | 0    | 0      | G |
| 9 | BICF2P540492   | 64298434 | A | 0    | 0      | C |
| 9 | BICF2P406965   | 64309788 | C | 0.25 | 0.3333 | A |
| 9 | BICF2P1321133  | 64319694 | A | 0    | 0      | G |
| 9 | BICF2S23655993 | 64338592 | G | 0    | 0      | A |
| 9 | BICF2P317394   | 64350642 | A | 0.25 | 0.3571 | G |
| 9 | BICF2P562174   | 64371122 | A | 0.25 | 0.3571 | G |
| 9 | BICF2P1094627  | 64381802 | G | 0.75 | 0.6429 | A |
| 9 | BICF2S23420422 | 64388646 | A | 0.75 | 0.6429 | G |
| 9 | BICF2P1362601  | 64413380 | G | 0.5  | 0.6429 | A |

|    |                         |         |   |      |        |   |
|----|-------------------------|---------|---|------|--------|---|
| 10 | BICF2P313724            | 3032598 | 0 | 0    | 0      | G |
| 10 | BICF2S23551676          | 3056466 | A | 0.25 | 0.5    | G |
| 10 | BICF2S23216909          | 3081933 | A | 0.25 | 0.5    | G |
| 10 | BICF2S23122060          | 3106639 | G | 0.25 | 0.5    | A |
| 10 | BICF2P80152             | 3124161 | G | 0    | 0      | A |
| 10 | BICF2S23015397          | 3138788 | G | 0.25 | 0.5    | A |
| 10 | BICF2P414983            | 3146976 | 0 | 0    | 0      | A |
| 10 | TIGRP2P137401_rs9172327 | 3171783 | 0 | 0    | 0      | A |
| 10 | TIGRP2P137417_rs8746526 | 3218635 | 0 | 0    | 0      | A |
| 10 | BICF2P1434658           | 3231166 | 0 | 0    | 0      | A |
| 10 | BICF2P1185816           | 3246030 | 0 | 0    | 0      | G |
| 10 | BICF2P837966            | 3281945 | 0 | 0    | 0      | C |
| 10 | BICF2S23538422          | 3300301 | A | 0.25 | 0.5    | G |
| 10 | BICF2S23624594          | 3305479 | G | NA   | 0.6667 | A |
| 10 | BICF2S23153666          | 3336514 | C | 0.25 | 0.5    | A |
| 10 | BICF2S23134339          | 3340566 | G | 0.25 | 0.5    | A |
| 10 | BICF2S2319425           | 3349524 | G | 0.25 | 0.5    | A |
| 10 | BICF2P946036            | 3386794 | 0 | 0    | 0      | C |
| 10 | BICF2S24312362          | 3458571 | 0 | 0    | 0      | A |
| 10 | BICF2P1351813           | 3467311 | 0 | 0    | 0      | A |
| 10 | BICF2P1106789           | 3496232 | 0 | 0    | 0      | A |
| 10 | BICF2P1454205           | 3508776 | A | 0    | 0      | G |
| 10 | BICF2P1293725           | 3530354 | G | 0    | 0      | A |
| 10 | BICF2G630668982         | 3541673 | 0 | 0    | 0      | G |
| 10 | BICF2P1303102           | 3605262 | 0 | 0    | 0      | A |
| 10 | TIGRP2P137429_rs9132915 | 3628540 | 0 | 0    | 0      | G |
| 10 | BICF2S23150087          | 3641119 | A | 0    | 0.2857 | C |
| 10 | BICF2P948311            | 3696837 | 0 | 0    | 0      | A |
| 10 | BICF2P201150            | 3708761 | 0 | 0    | 0      | C |
| 10 | BICF2P493671            | 3726987 | 0 | 0    | 0      | A |
| 10 | BICF2S23332816          | 3750954 | C | 0.25 | 0.5714 | A |
| 10 | BICF2P708795            | 3810086 | 0 | 0    | 0      | G |
| 10 | BICF2P742979            | 3821336 | 0 | 0    | 0      | G |
| 10 | BICF2P279756            | 3856911 | 0 | 0    | 0      | G |
| 10 | BICF2P330484            | 3869076 | 0 | 0    | 0      | C |
| 10 | BICF2P881426            | 3883833 | 0 | 0    | 0      | A |
| 10 | BICF2P205401            | 3931216 | 0 | 0    | 0      | G |
| 10 | BICF2P1184169           | 3936815 | 0 | 0    | 0      | A |
| 10 | BICF2P784053            | 3992549 | 0 | 0    | 0      | A |
| 10 | TIGRP2P137445_rs8572249 | 4011766 | 0 | 0    | 0      | A |
| 10 | BICF2S23538703          | 4045506 | A | 0.25 | 0.2143 | G |
| 10 | BICF2P352207            | 4074917 | 0 | 0    | 0      | C |
| 10 | BICF2P841430            | 4098267 | A | 0    | 0      | G |
| 10 | TIGRP2P137447_rs8595942 | 4105629 | 0 | 0    | 0      | C |
| 10 | BICF2S23136899          | 4120842 | C | 0.25 | 0.5714 | A |
| 10 | BICF2P1390665           | 4161060 | A | 0.25 | 0.2143 | G |
| 10 | BICF2P197443            | 4184379 | 0 | 0    | 0      | A |

|    |                         |         |   |      |        |   |
|----|-------------------------|---------|---|------|--------|---|
| 10 | BICF2P168510            | 4191591 | 0 | 0    | 0      | T |
| 10 | BICF2P579099            | 4215158 | C | 0.25 | 0.2143 | A |
| 10 | BICF2P887362            | 4247584 | 0 | 0    | 0      | A |
| 10 | BICF2P639742            | 4255193 | 0 | 0    | 0      | G |
| 10 | BICF2P442343            | 4280872 | 0 | 0    | 0      | C |
| 10 | BICF2P179897            | 4294415 | 0 | 0    | 0      | T |
| 10 | BICF2P323402            | 4305790 | A | 0.25 | 0.2143 | G |
| 10 | BICF2P261885            | 4316713 | G | 1    | 1      | A |
| 10 | BICF2P1325941           | 4330293 | 0 | 0    | 0      | G |
| 10 | BICF2P993521            | 4343827 | G | 0.5  | 0.7857 | A |
| 10 | BICF2P194336            | 4352815 | A | 0    | 0      | G |
| 10 | BICF2S23134693          | 4363262 | G | 0.25 | 0.2143 | A |
| 10 | BICF2P922372            | 4375664 | 0 | 0    | 0      | G |
| 10 | BICF2P1272851           | 4387646 | A | 0.25 | 0.1667 | G |
| 10 | BICF2P1389324           | 4412270 | A | 0.25 | 0.2143 | G |
| 10 | BICF2P607403            | 4420879 | A | 0.5  | 0.7857 | C |
| 10 | BICF2P523018            | 4514991 | 0 | 0    | 0      | T |
| 10 | BICF2P158858            | 4522331 | A | 0    | 0      | G |
| 10 | BICF2P574744            | 4539423 | A | 0    | 0      | G |
| 10 | BICF2P1017367           | 4553741 | A | 0.25 | 0.2143 | G |
| 10 | BICF2P943825            | 4561110 | G | 0.5  | 0.5    | A |
| 10 | BICF2S2373644           | 4574924 | C | 0.5  | 0.5    | G |
| 10 | BICF2P829676            | 4591597 | A | 0.5  | 0.5    | C |
| 10 | BICF2P1256476           | 4603245 | 0 | 0    | 0      | G |
| 10 | BICF2P722117            | 4641732 | G | 0.75 | 0.7143 | A |
| 10 | BICF2S22951569          | 4647897 | A | 0    | 0      | G |
| 10 | BICF2P473748            | 4679395 | 0 | 0    | 0      | C |
| 10 | BICF2S2317257           | 4703539 | A | 0.25 | 0.2143 | G |
| 10 | BICF2P119147            | 4748024 | 0 | 0    | 0      | A |
| 10 | BICF2P436418            | 4770034 | 0 | 0    | 0      | C |
| 10 | BICF2P616702            | 4783832 | 0 | 0    | 0      | C |
| 10 | BICF2S23416561          | 4806236 | 0 | 0    | 0      | G |
| 10 | BICF2S236415            | 4814858 | C | 0.75 | 0.4286 | G |
| 10 | BICF2P148333            | 4823856 | 0 | 0    | 0      | C |
| 10 | BICF2P38412             | 4850586 | 0 | 0    | 0      | C |
| 10 | BICF2P476523            | 4903176 | A | 0.25 | 0.2143 | G |
| 10 | BICF2P35992             | 4969402 | 0 | 0    | 0      | G |
| 10 | TIGRP2P141672_rs9042783 | 5016842 | 0 | 0    | 0      | C |
| 10 | BICF2S23738174          | 5035631 | A | 0    | 0      | G |
| 10 | BICF2S2459053           | 5041986 | T | 0.5  | 0.2143 | A |
| 10 | BICF2P1364926           | 5070889 | C | 0    | 0      | A |
| 10 | BICF2S23258301          | 5076527 | G | 0.5  | 0.2143 | A |
| 10 | BICF2S23041659          | 5094073 | G | 0    | 0      | A |
| 10 | BICF2P701493            | 5111375 | C | 0.5  | 0.2143 | A |
| 10 | BICF2P544902            | 5117529 | 0 | 0    | 0      | G |
| 10 | BICF2P147652            | 5149632 | G | 0    | 0      | A |
| 10 | BICF2P1213982           | 5157275 | G | 0.5  | 0.2143 | A |

|    |                         |         |   |      |        |   |
|----|-------------------------|---------|---|------|--------|---|
| 10 | BICF2P633408            | 5171364 | A | 0    | 0      | C |
| 10 | BICF2P80262             | 5187627 | G | 0    | 0      | A |
| 10 | TIGRP2P141678_rs9140022 | 5206563 | 0 | 0    | 0      | G |
| 10 | BICF2S23211324          | 5210568 | A | 0    | 0      | G |
| 10 | BICF2P447413            | 5221427 | G | 1    | 1      | A |
| 10 | BICF2P623559            | 5240223 | 0 | 0    | 0      | A |
| 10 | BICF2S23322314          | 5245184 | A | 0.25 | 0.5833 | G |
| 10 | TIGRP2P141679_rs8678837 | 5263947 | 0 | 0    | 0      | A |
| 10 | G567f76S152             | 5280491 | 0 | 0    | 0      | A |
| 10 | BICF2P914978            | 5317253 | 0 | 0    | 0      | A |
| 10 | BICF2S23234748          | 5342778 | 0 | 0    | 0      | A |
| 10 | BICF2S234970            | 5356795 | A | 0.25 | 0.2857 | G |
| 10 | BICF2S23642724          | 5365025 | A | 0    | 0      | G |
| 10 | BICF2P216482            | 5383501 | G | 0    | 0      | A |
| 10 | BICF2P582948            | 5400556 | 0 | 0    | 0      | C |
| 10 | BICF2S2364052           | 5412951 | A | 0.5  | 0.2143 | G |
| 10 | BICF2S2363180           | 5417711 | C | 0.5  | 0.2143 | G |
| 10 | G568f47S333             | 5440236 | G | 1    | 1      | A |
| 10 | BICF2P1400503           | 5462847 | G | 1    | 1      | A |
| 10 | BICF2S23118257          | 5479767 | G | 0.75 | 0.7143 | A |
| 10 | BICF2S23212054          | 5504458 | 0 | 0    | 0      | A |
| 10 | G569f40S136             | 5526108 | 0 | 0    | 0      | C |
| 10 | BICF2S2329781           | 5547006 | G | 0    | 0.25   | A |
| 10 | BICF2S23244904          | 5555944 | A | 0    | 0.2857 | G |
| 10 | BICF2P829794            | 5585060 | G | 0.5  | 0.2143 | A |
| 10 | BICF2S23055939          | 5594959 | G | 0.25 | 0.5    | A |
| 10 | BICF2P1162538           | 5626769 | A | 0    | 0      | G |
| 10 | BICF2S23137919          | 5638637 | G | 0.25 | 0.5    | A |
| 10 | BICF2P950178            | 5647387 | 0 | 0    | 0      | C |
| 10 | BICF2P1203829           | 5679587 | A | 0    | 0      | G |
| 10 | TIGRP2P141684_rs9063255 | 5767559 | 0 | 0    | 0      | C |
| 10 | BICF2S23132431          | 5793484 | 0 | 0    | 0      | G |
| 10 | BICF2P658083            | 5810341 | 0 | 0    | 0      | G |
| 10 | BICF2S2397788           | 5826381 | G | 0.25 | 0.2143 | A |
| 10 | BICF2S23247158          | 5849369 | A | 0    | 0      | C |
| 10 | BICF2P845994            | 5857355 | 0 | 0    | 0      | A |
| 10 | BICF2P625228            | 5871628 | 0 | 0    | 0      | A |
| 10 | G570f26S182             | 5894741 | C | 0    | 0      | A |
| 10 | BICF2P1429709           | 5922150 | A | 0    | 0.2857 | G |
| 10 | BICF2P625960            | 5955346 | 0 | 0    | 0      | A |
| 10 | BICF2P92143             | 5968131 | G | 0.5  | 0.2143 | A |
| 10 | BICF2P791915            | 5979022 | A | 0    | 0.2857 | G |
| 10 | BICF2P116176            | 5981460 | 0 | 0    | 0      | A |
| 10 | G571f39S207             | 6017585 | G | 0    | 0      | A |
| 10 | BICF2P804801            | 6056190 | 0 | 0    | 0      | A |
| 10 | G572f16S141             | 6075468 | A | 0    | 0      | C |
| 10 | BICF2P295619            | 6097741 | 0 | 0    | 0      | A |

|    |                         |         |   |      |        |   |
|----|-------------------------|---------|---|------|--------|---|
| 10 | BICF2P1109267           | 6151102 | 0 | 0    | 0      | A |
| 10 | BICF2P763613            | 6193573 | A | 0.5  | 0.2143 | G |
| 10 | BICF2S23147241          | 6204409 | 0 | 0    | 0      | A |
| 10 | BICF2P732279            | 6214322 | 0 | 0    | 0      | C |
| 10 | BICF2P1151381           | 6225107 | 0 | 0    | 0      | A |
| 10 | BICF2S23737954          | 6238255 | G | 0    | 0      | A |
| 10 | BICF2P695456            | 6271976 | 0 | 0    | 0      | G |
| 10 | BICF2P106504            | 6283096 | 0 | 0    | 0      | A |
| 10 | BICF2S23011067          | 6324274 | A | 1    | 1      | G |
| 10 | BICF2S23019630          | 6328084 | A | 1    | 1      | C |
| 10 | BICF2P815464            | 6360004 | A | 0    | 0.2857 | G |
| 10 | BICF2P1153895           | 6376080 | 0 | 0    | 0      | A |
| 10 | TIGRP2P141690_rs8859765 | 6386556 | 0 | 0    | 0      | T |
| 10 | BICF2P966646            | 6403616 | A | 0    | 0.2857 | G |
| 10 | BICF2P605692            | 6420775 | 0 | 0    | 0      | G |
| 10 | BICF2P1402317           | 6429379 | 0 | 0    | 0      | A |
| 10 | BICF2P1042608           | 6451339 | 0 | 0    | 0      | G |
| 10 | BICF2P745302            | 6468895 | C | 0.5  | 0.2143 | A |
| 10 | BICF2P471905            | 6477302 | A | 0.5  | 0.2143 | G |
| 10 | BICF2P792320            | 6487243 | 0 | 0    | 0      | A |
| 10 | BICF2P570770            | 6505892 | 0 | 0    | 0      | G |
| 10 | BICF2P626487            | 6514569 | A | 0    | 0.2857 | G |
| 10 | BICF2P310876            | 6546722 | 0 | 0    | 0      | G |
| 10 | BICF2S23449565          | 6569942 | A | 0    | 0      | G |
| 10 | BICF2P230089            | 6618495 | 0 | 0    | 0      | A |
| 10 | BICF2P720099            | 6627986 | 0 | 0    | 0      | G |
| 10 | BICF2P1153846           | 6653334 | 0 | 0    | 0      | A |
| 10 | TIGRP2P141694_rs8941482 | 6678560 | 0 | 0    | 0      | C |
| 10 | TIGRP2P141695_rs9058091 | 6702961 | 0 | 0    | 0      | G |
| 10 | BICF2P1152234           | 6733319 | A | 1    | 0.5    | G |
| 10 | BICF2S23512222          | 6743123 | C | 0.75 | 0.7143 | A |
| 10 | BICF2P405279            | 6756422 | 0 | 0    | 0      | A |
| 10 | BICF2P137721            | 6816827 | 0 | 0    | 0      | T |
| 10 | BICF2P617378            | 6840140 | 0 | 0    | 0      | G |
| 10 | BICF2P457981            | 6873334 | A | 0.5  | 0.2143 | G |
| 10 | BICF2P1011248           | 6881097 | A | 0.5  | 0.2143 | C |
| 10 | G576f19S182             | 6909946 | 0 | 0    | 0      | C |
| 10 | BICF2P1304549           | 6929930 | 0 | 0    | 0      | A |
| 10 | BICF2S23914906          | 6940773 | 0 | 0    | 0      | G |
| 10 | BICF2P612307            | 6979147 | 0 | 0    | 0      | A |
| 10 | BICF2P57449             | 7007938 | 0 | 0    | 0      | G |
| 10 | BICF2P435342            | 7024301 | A | 0.75 | 0.4167 | C |
| 10 | BICF2S23341290          | 7033157 | A | 1    | 0.4167 | G |
| 10 | BICF2P1043894           | 7040245 | G | 0.75 | 0.4286 | A |
| 10 | BICF2P1436032           | 7053431 | C | 0.75 | 0.4286 | A |
| 10 | BICF2S23753647          | 7068324 | A | 0.75 | 0.4286 | G |
| 10 | BICF2P730806            | 7079775 | A | 0.75 | 0.4286 | G |

|    |                         |         |   |      |        |   |
|----|-------------------------|---------|---|------|--------|---|
| 10 | BICF2S23036394          | 7104919 | A | 0    | 0      | G |
| 10 | BICF2S23035356          | 7108514 | G | 0    | 0      | A |
| 10 | BICF2S236342            | 7130361 | A | 0    | 0      | C |
| 10 | BICF2S23251143          | 7170176 | G | 1    | 0.7143 | A |
| 10 | BICF2P365623            | 7197759 | 0 | 0    | 0      | A |
| 10 | BICF2P727174            | 7200056 | 0 | 0    | 0      | C |
| 10 | BICF2P338824            | 7261865 | G | 0.25 | 0.5    | A |
| 10 | BICF2P340141            | 7273131 | A | 0.25 | 0.5    | G |
| 10 | BICF2P703253            | 7283733 | G | 0.25 | 0.5    | A |
| 10 | BICF2P1222750           | 7294685 | A | 0.25 | 0.5    | G |
| 10 | BICF2S2336724           | 7312004 | A | 0.5  | 0.7857 | G |
| 10 | BICF2P1080176           | 7315649 | G | 0.5  | 0.7857 | A |
| 10 | BICF2P842214            | 7326577 | 0 | 0    | 0      | G |
| 10 | BICF2P592377            | 7347348 | G | 0.5  | 0.7857 | A |
| 10 | BICF2P132156            | 7358196 | G | 0.5  | 0.7857 | A |
| 10 | BICF2P1006276           | 7360093 | C | 0.5  | 0.7857 | A |
| 10 | BICF2P1408492           | 7372731 | C | 0.5  | 0.7857 | A |
| 10 | BICF2P918645            | 7390289 | G | 0.5  | 0.7857 | A |
| 10 | BICF2P1389331           | 7399630 | A | 0.5  | 0.2143 | G |
| 10 | BICF2P1341850           | 7409512 | A | 0.5  | 0.2143 | G |
| 10 | TIGRP2P141701_rs8992111 | 7427439 | 0 | 0    | 0      | A |
| 10 | BICF2S23047160          | 7446537 | G | 0.5  | 0.2143 | A |
| 10 | BICF2P1376145           | 7454554 | G | 0.5  | 0.2143 | C |
| 10 | BICF2P1092036           | 7467901 | A | 0.5  | 0.2143 | T |
| 10 | BICF2S23050064          | 7477509 | C | 0.5  | 0.2143 | A |
| 10 | BICF2S23423449          | 7505950 | 0 | 0    | 0      | G |
| 10 | BICF2P535024            | 7512753 | G | 0.5  | 0.2143 | A |
| 10 | BICF2P181213            | 7528471 | A | 0.5  | 0.2143 | G |
| 10 | BICF2P49374             | 7558555 | G | 0.5  | 0.2143 | A |
| 10 | BICF2P304506            | 7572784 | C | 0.5  | 0.2143 | A |
| 10 | BICF2P1093470           | 7621497 | G | 0.5  | 0.2143 | A |
| 10 | BICF2P925150            | 7625680 | A | 0.5  | 0.2143 | G |
| 10 | BICF2P1105131           | 7650089 | G | 0.25 | 0.5    | A |
| 10 | BICF2P778791            | 7665221 | A | 0.25 | 0.5    | G |
| 10 | BICF2S23355174          | 7676100 | A | 0.5  | 0.1667 | G |
| 10 | BICF2P5108              | 7685308 | A | 0.5  | 0.2143 | G |
| 10 | BICF2P1270711           | 7694400 | G | 0.25 | 0.5    | A |
| 10 | BICF2P256839            | 7716926 | C | 0.25 | 0.5    | A |
| 10 | BICF2P653041            | 7735333 | G | 0.25 | 0.5    | A |
| 10 | BICF2P813570            | 7744387 | G | 0.25 | 0.5    | A |
| 10 | BICF2S23624813          | 7759002 | A | 0.25 | 0.5    | G |
| 10 | BICF2P488258            | 7768560 | G | 0    | 0      | A |
| 10 | BICF2P86991             | 7777208 | A | 0    | 0      | C |
| 10 | BICF2P190315            | 7792968 | G | 0    | 0      | A |
| 10 | BICF2S2444424           | 7805503 | G | 0.25 | 0.5    | A |
| 10 | BICF2P295148            | 7813138 | A | 0    | 0      | G |
| 10 | BICF2P197953            | 7822004 | G | 0    | 0      | A |

|    |                         |         |   |      |        |   |
|----|-------------------------|---------|---|------|--------|---|
| 10 | BICF2P373329            | 7845331 | A | 0    | 0      | G |
| 10 | G577f35S36              | 7866732 | 0 | 0    | 0      | C |
| 10 | BICF2P721345            | 7898160 | 0 | 0    | 0      | A |
| 10 | TIGRP2P141709_rs8684254 | 7905937 | 0 | 0    | 0      | A |
| 10 | BICF2P1412359           | 7927964 | G | 0.75 | 0.5    | A |
| 10 | BICF2P1104685           | 7938435 | 0 | 0    | 0      | A |
| 10 | BICF2P1171081           | 7949390 | G | 0.25 | 0.5    | A |
| 10 | BICF2S23129706          | 7966915 | A | 0.5  | 0.7857 | G |
| 10 | BICF2P185665            | 7971079 | A | 0.5  | 0.7857 | G |
| 10 | BICF2P484831            | 7987200 | A | 1    | 1      | G |
| 10 | BICF2P900588            | 7996352 | A | 1    | 1      | G |
| 10 | BICF2S23444133          | 8009531 | A | 1    | 1      | C |
| 10 | BICF2P395308            | 8019967 | G | 1    | 1      | C |
| 10 | BICF2P599664            | 8028239 | A | 1    | 1      | G |
| 10 | BICF2P896379            | 8070007 | 0 | 0    | 0      | A |
| 10 | BICF2P635077            | 8082416 | G | 1    | 1      | A |
| 10 | TIGRP2P141711_rs8543433 | 8090316 | 0 | 0    | 0      | G |
| 10 | BICF2P768240            | 8109634 | 0 | 0    | 0      | G |
| 10 | BICF2P1112049           | 8145514 | 0 | 0    | 0      | A |
| 10 | BICF2P36174             | 8176609 | A | 0    | 0      | G |
| 10 | BICF2P1424159           | 8226957 | 0 | 0    | 0      | A |
| 10 | BICF2P1042684           | 8257992 | 0 | 0    | 0      | A |
| 10 | G578f71S155             | 8289828 | 0 | 0    | 0      | G |
| 10 | BICF2P748308            | 8324159 | 0 | 0    | 0      | A |
| 10 | BICF2P1390597           | 8341246 | C | 0.25 | 0.5    | A |
| 10 | BICF2P753483            | 8365103 | G | 0.75 | 0.7143 | A |
| 10 | BICF2P753481            | 8365396 | A | 0.75 | 0.7143 | G |
| 10 | BICF2P1144330           | 8376408 | A | 0.25 | 0.5    | C |
| 10 | BICF2S22957387          | 8399169 | G | 0.75 | 0.7143 | A |
| 10 | BICF2S23052387          | 8424072 | G | 0    | 0      | A |
| 10 | BICF2P1153020           | 8439966 | G | 0.25 | 0.5    | A |
| 10 | BICF2P661940            | 8441871 | G | 0.25 | 0.5    | A |
| 10 | BICF2P661941            | 8442370 | A | 0.25 | 0.5    | T |
| 10 | BICF2P344383            | 8479592 | C | 0.5  | 0.7857 | A |
| 10 | BICF2P1433333           | 8514903 | T | 0.5  | 0.7857 | A |
| 10 | BICF2P527987            | 8552413 | G | 0.5  | 0.7857 | A |
| 10 | BICF2P1393451           | 8586698 | 0 | 0    | 0      | A |
| 10 | BICF2P318489            | 8602431 | G | 0.25 | 0.5    | A |
| 10 | BICF2P1127836           | 8620616 | C | 0.5  | 0.2143 | A |
| 10 | BICF2S234906            | 8625145 | G | 0    | 0      | A |
| 10 | BICF2P1213939           | 8653746 | G | 0.5  | 0.7857 | C |
| 10 | BICF2P1119320           | 8697455 | 0 | 0    | 0      | A |
| 10 | BICF2P606582            | 8722311 | 0 | 0    | 0      | A |
| 10 | BICF2S23642337          | 8731792 | A | 0    | 0      | G |
| 10 | TIGRP2P141723_rs8788080 | 8760845 | 0 | 0    | 0      | A |
| 10 | BICF2P550486            | 8797787 | 0 | 0    | 0      | G |
| 10 | BICF2S23145890          | 8810412 | A | 0    | 0      | G |

|    |                         |         |   |      |        |   |
|----|-------------------------|---------|---|------|--------|---|
| 10 | BICF2P919122            | 8821729 | A | 0.25 | 0.5    | G |
| 10 | BICF2S23760446          | 8834134 | G | 0.5  | 0.2143 | A |
| 10 | BICF2P346061            | 8862961 | G | 0.5  | 0.2143 | A |
| 10 | BICF2P1401556           | 8869043 | C | 0.5  | 0.7857 | G |
| 10 | BICF2P1167620           | 8879364 | G | 0.5  | 0.7857 | A |
| 10 | BICF2P520735            | 8909524 | G | 0.5  | 0.7857 | A |
| 10 | BICF2P592315            | 8931274 | G | 0.5  | 0.7857 | A |
| 10 | BICF2P918283            | 8947418 | G | 0.5  | 0.7857 | A |
| 10 | BICF2P492925            | 8965567 | G | 0.25 | 0.5    | C |
| 10 | BICF2P440827            | 8974471 | A | 0.5  | 0.7857 | T |
| 10 | BICF2P194965            | 8990289 | G | 0.5  | 0.7857 | A |
| 10 | BICF2P1053820           | 8999303 | C | 0.5  | 0.7857 | G |
| 10 | BICF2P110204            | 9011292 | 0 | 0    | 0      | G |
| 10 | BICF2P1170295           | 9017398 | G | 0.5  | 0.7857 | A |
| 10 | BICF2P169855            | 9030861 | A | 0.5  | 0.7857 | G |
| 10 | BICF2P169854            | 9031116 | A | 0.5  | 0.7857 | T |
| 10 | BICF2P248110            | 9040255 | A | 0.25 | 0.7143 | G |
| 10 | BICF2P1433877           | 9050992 | G | 0.5  | 0.7857 | A |
| 10 | BICF2S24110485          | 9075132 | 0 | 0    | 0      | G |
| 10 | BICF2P130531            | 9089913 | 0 | 0    | 0      | A |
| 10 | BICF2S23654391          | 9117729 | A | 0.5  | 0.2143 | G |
| 10 | BICF2P1359538           | 9136638 | G | 0.25 | 0.5    | A |
| 10 | BICF2P895944            | 9158211 | A | 0.5  | 0.2143 | G |
| 10 | BICF2P916070            | 9189039 | G | 0.25 | 0.5    | A |
| 10 | BICF2P594450            | 9207359 | C | 0.25 | 0.5    | A |
| 10 | BICF2P571004            | 9212170 | G | 0.25 | 0.5    | A |
| 10 | BICF2P460467            | 9223107 | G | 0.25 | 0.5    | A |
| 10 | BICF2P1058753           | 9242091 | G | 0.75 | 0.7143 | A |
| 10 | BICF2P1058754           | 9242137 | G | 0.75 | 0.7143 | A |
| 10 | BICF2P255973            | 9251468 | A | 0.25 | 0.5    | C |
| 10 | BICF2P422653            | 9260727 | A | 0.25 | 0.5    | G |
| 10 | BICF2P509361            | 9271106 | A | 0.25 | 0.5    | G |
| 10 | BICF2P891226            | 9290612 | 0 | 0    | 0      | A |
| 10 | BICF2P730497            | 9314870 | G | 0    | 0.2857 | A |
| 10 | BICF2P1166761           | 9354049 | 0 | 0    | 0      | A |
| 10 | BICF2P790614            | 9377816 | A | 0.5  | 0.2143 | G |
| 10 | BICF2P1419982           | 9410031 | 0 | 0    | 0      | A |
| 10 | TIGRP2P141734_rs8917883 | 9426800 | 0 | 0    | 0      | A |
| 10 | BICF2S2441418           | 9445119 | 0 | 0    | 0      | C |
| 10 | BICF2P196568            | 9467560 | 0 | 0    | 0      | A |
| 10 | BICF2P45452             | 9506695 | A | 0.75 | 0.4286 | G |
| 10 | BICF2P161973            | 9541186 | 0 | 0    | 0      | A |
| 10 | BICF2P555215            | 9547807 | A | 1    | 0.7143 | G |
| 10 | BICF2P484456            | 9577391 | A | 0    | 0.2857 | G |
| 10 | BICF2P947771            | 9585333 | G | 1    | 0.75   | A |
| 10 | BICF2P976577            | 9592333 | A | 1    | 0.75   | C |
| 10 | BICF2P1056634           | 9628651 | A | 0    | 0.2857 | G |



|    |                         |          |   |      |        |   |
|----|-------------------------|----------|---|------|--------|---|
| 10 | BICF2P945408            | 9663107  | A | 0    | 0.2857 | G |
| 10 | BICF2S23762663          | 9698893  | A | 1    | 1      | C |
| 10 | BICF2P1040109           | 9713960  | C | 0.75 | 0.4286 | A |
| 10 | BICF2P475438            | 9726873  | A | 0    | 0      | G |
| 10 | BICF2P1154532           | 9738187  | A | 1    | 1      | G |
| 10 | BICF2P605914            | 9744554  | A | 1    | 1      | G |
| 10 | BICF2S23046151          | 9748801  | A | 1    | 1      | G |
| 10 | BICF2P145764            | 9761041  | G | 1    | 1      | A |
| 10 | BICF2P120884            | 9785815  | 0 | 0    | 0      | G |
| 10 | BICF2S23121107          | 9790066  | G | 0    | 0      | A |
| 10 | BICF2P571652            | 9802000  | A | 0.75 | 0.4286 | G |
| 10 | BICF2S22913956          | 9818874  | A | 0.75 | 0.4286 | G |
| 10 | BICF2P532643            | 9836009  | G | 0.5  | 0.7857 | A |
| 10 | BICF2P367457            | 9848655  | 0 | 0    | 0      | A |
| 10 | BICF2P927336            | 9859738  | 0 | 0    | 0      | G |
| 10 | BICF2S23715357          | 9880899  | A | 0.5  | 0.7857 | C |
| 10 | BICF2P1459668           | 9904595  | A | 0    | 0      | G |
| 10 | BICF2P1318411           | 9933314  | A | 0.5  | 0.2143 | G |
| 10 | BICF2P193161            | 9945670  | 0 | 0    | 0      | C |
| 10 | BICF2P1456428           | 9969503  | 0 | 0    | 0      | A |
| 10 | BICF2P464350            | 9972656  | A | 0.5  | 0.2143 | G |
| 10 | BICF2P233183            | 10007965 | 0 | 0    | 0      | G |
| 10 | G579f41S199             | 10039130 | A | 0    | 0      | C |
| 10 | G579f42S265             | 10040438 | A | 0.25 | 0.5714 | G |
| 10 | BICF2P251568            | 10060618 | A | 0.25 | 0.2143 | G |
| 10 | BICF2P586886            | 10097539 | 0 | 0    | 0      | A |
| 10 | BICF2P533704            | 10155349 | G | 0.25 | 0.2143 | A |
| 10 | BICF2P5518              | 10211706 | G | 0.5  | 0.7857 | A |
| 10 | BICF2P891420            | 10216377 | 0 | 0    | 0      | C |
| 10 | BICF2P391159            | 10245655 | 0 | 0    | 0      | C |
| 10 | BICF2P1225262           | 10265925 | G | 0.5  | 0.2143 | A |
| 10 | BICF2P809657            | 10279174 | G | 0.25 | 0.2143 | A |
| 10 | BICF2P776045            | 10281069 | A | 0.5  | 0.9    | G |
| 10 | BICF2P699421            | 10302292 | G | 0.5  | 0.7857 | A |
| 10 | BICF2P1164988           | 10322338 | G | 0.5  | 0.7857 | A |
| 10 | BICF2P1254712           | 10333372 | C | 0.5  | 0.7857 | G |
| 10 | BICF2P1064035           | 10340230 | A | 0.5  | 0.7857 | G |
| 10 | BICF2P164833            | 10380958 | 0 | 0    | 0      | A |
| 10 | BICF2P53899             | 10393318 | A | 0.5  | 0.7857 | G |
| 10 | BICF2P154098            | 10403688 | A | 0.5  | 0.7857 | G |
| 10 | BICF2P408346            | 10412216 | A | 0.5  | 0.7857 | G |
| 10 | TIGRP2P137479_rs9137591 | 10424137 | 0 | 0    | 0      | A |
| 10 | BICF2P1121174           | 10446660 | 0 | 0    | 0      | C |
| 10 | BICF2P540844            | 10462369 | C | 0    | 0      | A |
| 10 | BICF2P163800            | 10466997 | 0 | 0    | 0      | C |
| 10 | BICF2S23712785          | 10485510 | A | 0    | 0      | G |
| 10 | BICF2S22951426          | 10491306 | A | 0.5  | 0.2143 | G |

|    |                         |          |   |      |        |   |
|----|-------------------------|----------|---|------|--------|---|
| 10 | BICF2S22912683          | 10500857 | G | 0.25 | 0.2143 | A |
| 10 | BICF2P1371294           | 10506272 | A | 0.25 | 0.5714 | G |
| 10 | BICF2P446404            | 10511720 | C | 0.5  | 0.2143 | A |
| 10 | BICF2P1219487           | 10526832 | A | 0.5  | 0.1667 | C |
| 10 | BICF2P1370648           | 10539991 | G | 0.5  | 0.2143 | A |
| 10 | BICF2P1081679           | 10549505 | G | 0.5  | 0.2143 | A |
| 10 | BICF2P895698            | 10566659 | A | 0.5  | 0.2143 | G |
| 10 | BICF2S23239961          | 10576266 | G | 0.5  | 0.2143 | A |
| 10 | BICF2P1392440           | 10582816 | G | 0.5  | 0.2143 | A |
| 10 | BICF2P1139734           | 10609565 | C | 0.5  | 0.2143 | A |
| 10 | TIGRP2P137482_rs8651763 | 10636416 | 0 | 0    | 0      | G |
| 10 | BICF2P822147            | 10644758 | A | 0.75 | 0.7857 | C |
| 10 | BICF2P949229            | 10655233 | A | 0.75 | 0.7857 | C |
| 10 | BICF2P491870            | 10677936 | G | 0.75 | 0.7857 | C |
| 10 | BICF2P1433273           | 10692535 | A | 0.5  | 0.3    | G |
| 10 | BICF2P619179            | 10703666 | C | 0.5  | 0.2143 | G |
| 10 | BICF2P330949            | 10707193 | C | 0.25 | 0.5714 | A |
| 10 | BICF2P816919            | 10758379 | 0 | 0    | 0      | G |
| 10 | BICF2S22960809          | 10769841 | G | 0    | 0      | A |
| 10 | TIGRP2P137491_rs9078549 | 10780970 | 0 | 0    | 0      | A |
| 10 | BICF2S23631212          | 10791303 | 0 | 0    | 0      | A |
| 10 | BICF2P797775            | 10804969 | G | 0.5  | 0.2143 | A |
| 10 | BICF2P556483            | 10832919 | C | 0.5  | 0.2143 | G |
| 10 | BICF2P592005            | 10836411 | G | 0.5  | 0.2143 | A |
| 10 | BICF2P956151            | 10844974 | A | 0.25 | 0.5714 | G |
| 10 | BICF2S23446932          | 10859628 | G | 0    | 0      | A |
| 10 | BICF2P712340            | 10871535 | G | 0.25 | 0.5714 | A |
| 10 | BICF2S24410053          | 10879097 | A | 0    | 0      | C |
| 10 | BICF2P261508            | 10899997 | 0 | 0    | 0      | A |
| 10 | BICF2P86524             | 10907439 | A | 0.25 | 0.5714 | G |
| 10 | BICF2P567173            | 10916707 | 0 | 0    | 0      | A |
| 10 | BICF2P1017211           | 10934167 | 0 | 0    | 0      | A |
| 10 | BICF2P1118840           | 10944541 | G | 0.5  | 0.2143 | A |
| 10 | TIGRP2P137492_rs8775117 | 10948489 | 0 | 0    | 0      | A |
| 10 | BICF2S23211087          | 10979685 | G | 0.5  | 0.2143 | A |
| 10 | BICF2P283272            | 10983308 | A | 0.5  | 0.2143 | G |
| 10 | BICF2S24414279          | 11000274 | G | 0.75 | 0.7857 | A |
| 10 | BICF2S23426676          | 11006041 | A | 0.75 | 0.7857 | G |
| 10 | BICF2S23053016          | 11017208 | G | 0.75 | 0.7857 | A |
| 10 | BICF2S23012887          | 11045711 | A | 0.75 | 0.7857 | C |
| 10 | BICF2P718692            | 11056641 | A | 0.25 | 0.5714 | G |
| 10 | BICF2S23633421          | 11072007 | G | 0.75 | 0.7857 | A |
| 10 | BICF2P753942            | 11081762 | A | 0.25 | 0.5714 | G |
| 10 | BICF2P1167464           | 11086490 | A | 0.25 | 0.5714 | G |
| 10 | BICF2S23444568          | 11100691 | A | 0.75 | 0.8333 | G |
| 10 | BICF2P668742            | 11113579 | C | 0.5  | 0.2143 | A |
| 10 | BICF2P884833            | 11121003 | A | 0.25 | 0.5714 | G |

|    |                         |          |   |      |        |   |
|----|-------------------------|----------|---|------|--------|---|
| 10 | BICF2P723131            | 11137439 | A | 0.5  | 0.2143 | G |
| 10 | BICF2P263265            | 11148822 | G | 0.5  | 0.2143 | A |
| 10 | G580f46S240             | 11169956 | A | 0    | 0      | G |
| 10 | TIGRP2P137497_rs8915750 | 11190468 | 0 | 0    | 0      | C |
| 10 | BICF2P466106            | 11221610 | 0 | 0    | 0      | A |
| 10 | BICF2P795952            | 11231464 | T | 0.5  | 0.2143 | A |
| 10 | BICF2P738959            | 11241077 | G | 0.5  | 0.2143 | A |
| 10 | BICF2P926761            | 11256796 | G | 0.75 | 0.7857 | C |
| 10 | BICF2P774655            | 11260040 | C | 0.75 | 0.7857 | A |
| 10 | BICF2P344081            | 11275742 | 0 | 0    | 0      | C |
| 10 | BICF2P675135            | 11286497 | G | 0.75 | 0.7857 | A |
| 10 | TIGRP2P137499_rs9037069 | 11302747 | 0 | 0    | 0      | C |
| 10 | BICF2P1210313           | 11312838 | A | 0.75 | 0.7857 | G |
| 10 | BICF2S23611160          | 11324248 | A | 0.75 | 0.8333 | G |
| 10 | BICF2P1016611           | 11334108 | A | 0.75 | 0.7857 | G |
| 10 | BICF2P709352            | 11384057 | A | 0.75 | 0.7857 | G |
| 10 | BICF2P484070            | 11389378 | A | 0.75 | 0.7857 | G |
| 10 | BICF2P797505            | 11405132 | C | 0.75 | 0.7857 | G |
| 10 | BICF2P776298            | 11440860 | G | 0.5  | 0.2143 | A |
| 10 | BICF2P747041            | 11461551 | 0 | 0    | 0      | G |
| 10 | BICF2S22943767          | 11470246 | C | 0.25 | 0.5714 | A |
| 10 | BICF2S23752626          | 11532898 | A | 0.25 | 0.5714 | C |
| 10 | TIGRP2P137504_rs8940561 | 11542831 | 0 | 0    | 0      | A |
| 10 | BICF2S23342115          | 11549828 | A | 0.25 | 0.5714 | G |
| 10 | BICF2P1304125           | 11559700 | G | 0.25 | 0.5714 | A |
| 10 | TIGRP2P137505_rs8943212 | 11570287 | 0 | 0    | 0      | A |
| 10 | BICF2P1307818           | 11611583 | 0 | 0    | 0      | G |
| 10 | BICF2S23651627          | 11616330 | C | 0    | 0      | A |
| 10 | BICF2P1340585           | 11637768 | 0 | 0    | 0      | A |
| 10 | BICF2P332589            | 11644756 | C | 0.25 | 0.5714 | G |
| 10 | BICF2P483509            | 11656441 | 0 | 0    | 0      | A |
| 10 | BICF2P673774            | 11677772 | 0 | 0    | 0      | A |
| 10 | TIGRP2P137507_rs8589300 | 11698336 | 0 | 0    | 0      | A |
| 10 | BICF2P1069518           | 11722019 | 0 | 0    | 0      | G |
| 10 | BICF2P462764            | 11758427 | G | 0    | 0      | A |
| 10 | BICF2S23128717          | 11765012 | G | 0    | 0      | A |
| 10 | BICF2P1260553           | 11792711 | A | 0.25 | 0.5714 | G |
| 10 | BICF2S23740399          | 11834786 | G | 0    | 0      | A |
| 10 | BICF2P1034564           | 11850352 | A | 0    | 0      | G |
| 10 | BICF2P380539            | 11865459 | C | 0    | 0      | A |
| 10 | BICF2S23435011          | 11871355 | A | 0    | 0      | G |
| 10 | BICF2P1203203           | 11906661 | 0 | 0    | 0      | A |
| 10 | BICF2S2297387           | 11915602 | A | 0.25 | 0.5714 | G |
| 10 | BICF2P915634            | 11932455 | 0 | 0    | 0      | T |
| 10 | TIGRP2P137511_rs8564763 | 11946384 | 0 | 0    | 0      | C |
| 10 | BICF2P504911            | 11951126 | G | 0.25 | 0.5714 | A |
| 10 | BICF2P229118            | 11961276 | G | 0.25 | 0.5714 | A |

|    |                         |          |   |      |        |   |
|----|-------------------------|----------|---|------|--------|---|
| 10 | BICF2P381746            | 11976157 | 0 | 0    | 0      | G |
| 10 | BICF2S23537038          | 11998853 | A | 0    | 0      | G |
| 10 | BICF2P477614            | 12017097 | A | 0.25 | 0.5714 | G |
| 10 | BICF2S23012002          | 12018727 | 0 | 0    | 0      | A |
| 10 | BICF2S23428022          | 12029052 | A | 0.25 | 0.5714 | C |
| 10 | BICF2P1179759           | 12043785 | G | 0    | 0      | A |
| 10 | BICF2P307384            | 12062017 | 0 | 0    | 0      | G |
| 10 | BICF2S22930988          | 12062548 | 0 | 0    | 0      | C |
| 10 | BICF2P1319955           | 12063648 | G | 0    | 0      | A |
| 10 | BICF2P582642            | 12082601 | G | 0    | 0      | A |
| 10 | BICF2P1191449           | 12087526 | A | 0    | 0      | G |
| 10 | BICF2S23117066          | 12108015 | G | 0.25 | 0.5714 | A |
| 10 | BICF2P405361            | 12109168 | G | 0.25 | 0.5714 | A |
| 10 | BICF2P654832            | 12110791 | G | 0.25 | 0.5714 | A |
| 10 | BICF2P1174414           | 12134276 | A | 0    | 0      | G |
| 10 | BICF2P842186            | 12145374 | A | 0    | 0      | G |
| 10 | BICF2P1411885           | 12146657 | G | 0.25 | 0.5714 | A |
| 10 | BICF2P1194766           | 12156426 | G | 0.25 | 0.5714 | A |
| 10 | BICF2S23037045          | 12172500 | 0 | 0    | 0      | G |
| 10 | BICF2P800331            | 12186630 | A | 0    | 0      | G |
| 10 | BICF2P216551            | 12192088 | G | 0    | 0      | A |
| 10 | BICF2P1095774           | 12211334 | A | 0.25 | 0.5714 | G |
| 10 | BICF2S23037623          | 12227519 | G | 0.25 | 0.5714 | A |
| 10 | BICF2S23019926          | 12243693 | G | 0.25 | 0.5714 | A |
| 10 | BICF2S23032891          | 12248197 | A | 0.25 | 0.5714 | G |
| 10 | BICF2P750514            | 12263875 | A | 0    | 0      | C |
| 10 | BICF2S22912847          | 12275358 | G | 0    | 0      | A |
| 10 | BICF2P415301            | 12296389 | G | 0    | 0      | A |
| 10 | BICF2P808618            | 12322353 | A | 0    | 0      | C |
| 10 | BICF2S23347592          | 12335478 | G | 0    | 0      | A |
| 10 | BICF2P622438            | 12345185 | G | 0    | 0      | A |
| 10 | BICF2P1131455           | 12360627 | A | 0    | 0      | G |
| 10 | BICF2P1331753           | 12368783 | A | 0    | 0      | G |
| 10 | BICF2P803293            | 12378450 | G | 0    | 0      | A |
| 10 | BICF2P989649            | 12386289 | G | 0    | 0      | A |
| 10 | BICF2P761543            | 12399179 | G | 0    | 0      | A |
| 10 | BICF2P1125271           | 12410052 | A | 0    | 0      | G |
| 10 | BICF2P1289476           | 12438271 | A | 0.25 | 0.5714 | G |
| 10 | BICF2P553784            | 12446649 | C | 0    | 0      | A |
| 10 | BICF2S2317448           | 12459480 | G | 0    | 0      | A |
| 10 | BICF2S23113007          | 12470425 | A | 0    | 0      | G |
| 10 | BICF2G630668957         | 12477857 | T | 0.25 | 0.5714 | A |
| 10 | TIGRP2P137521_rs9035849 | 12494770 | 0 | 0    | 0      | G |
| 10 | BICF2S23554577          | 12504362 | T | 0    | 0      | A |
| 10 | BICF2G630668947         | 12520146 | G | 0.25 | 0.5714 | A |
| 10 | BICF2G630668931         | 12534243 | A | 0.25 | 0.5714 | C |
| 10 | BICF2G630668929         | 12536977 | G | 0.75 | 0.4286 | A |

|    |                         |          |   |      |        |   |
|----|-------------------------|----------|---|------|--------|---|
| 10 | BICF2S23611584          | 12552002 | A | 0    | 0      | G |
| 10 | BICF2G630668917         | 12558537 | A | 0.75 | 0.4286 | G |
| 10 | BICF2P723333            | 12609082 | 0 | 0    | 0      | C |
| 10 | TIGRP2P137525_rs8823700 | 12625366 | 0 | 0    | 0      | A |
| 10 | BICF2G630668912         | 12631189 | 0 | 0    | 0      | G |
| 10 | BICF2G630668908         | 12647562 | 0 | 0    | 0      | G |
| 10 | BICF2G630668906         | 12652002 | 0 | 0    | 0      | C |
| 10 | BICF2G630668898         | 12675486 | 0 | 0    | 0      | G |
| 10 | BICF2G630668880         | 12690886 | G | 0    | 0      | A |
| 10 | BICF2G630668851         | 12696221 | 0 | 0    | 0      | C |
| 10 | BICF2G630668816         | 12710344 | A | 0    | 0      | G |
| 10 | BICF2P1097262           | 12723077 | A | 0    | 0      | G |
| 10 | BICF2S23731463          | 12731854 | G | 0    | 0      | A |
| 10 | BICF2P231676            | 12751511 | 0 | 0    | 0      | A |
| 10 | TIGRP2P137531_rs9193334 | 12763175 | 0 | 0    | 0      | C |
| 10 | BICF2P757479            | 12783975 | T | 0    | 0      | A |
| 10 | BICF2S22954174          | 12801633 | G | 0.25 | 0.5714 | A |
| 10 | BICF2G630668802         | 12815982 | G | 0.75 | 0.4286 | A |
| 10 | BICF2P1183775           | 12841620 | G | 0    | 0      | A |
| 10 | BICF2G630668799         | 12841949 | T | 0.25 | 0.5714 | A |
| 10 | BICF2G630668784         | 12848333 | G | 0.25 | 0.5714 | A |
| 10 | BICF2G630668780         | 12858119 | G | 0.25 | 0.5714 | A |
| 10 | BICF2G630668758         | 12877349 | G | 0.25 | 0.5714 | A |
| 10 | BICF2G630668753         | 12883536 | A | 0.75 | 0.4286 | G |
| 10 | BICF2G630668751         | 12894618 | A | 0.25 | 0.5714 | G |
| 10 | BICF2G630668746         | 12904183 | G | 0    | 0      | A |
| 10 | BICF2S23030011          | 12927170 | C | 0    | 0      | A |
| 10 | BICF2S23346844          | 12937928 | A | 0.25 | 0.5714 | G |
| 10 | BICF2G630668682         | 12952585 | G | 0.25 | 0.5714 | A |
| 10 | BICF2P1006461           | 12963860 | A | 0.25 | 0.5714 | C |
| 10 | BICF2G630668680         | 12976221 | G | 0.25 | 0.5714 | A |
| 10 | BICF2G630668656         | 12993795 | A | 0    | 0      | G |
| 10 | BICF2G630668653         | 12998401 | C | 0.75 | 0.4286 | A |
| 10 | BICF2G630668640         | 13011828 | A | 0    | 0      | G |
| 10 | BICF2G630668626         | 13020500 | G | 0.25 | 0.5714 | A |
| 10 | BICF2G630668607         | 13039127 | G | 0.25 | 0.5714 | A |
| 10 | BICF2G630668599         | 13042160 | A | 0.25 | 0.5714 | G |
| 10 | BICF2G630668564         | 13063513 | 0 | 0    | 0      | G |
| 10 | BICF2S23159482          | 13065026 | A | 0    | 0      | G |
| 10 | BICF2G630668562         | 13084794 | 0 | 0    | 0      | C |
| 10 | BICF2G630668557         | 13090517 | G | 0.75 | 0.4286 | A |
| 10 | BICF2G630668542         | 13098500 | A | 0.75 | 0.3333 | G |
| 10 | BICF2G630668532         | 13120588 | G | 0.25 | 0.5714 | A |
| 10 | BICF2P950102            | 13144787 | 0 | 0    | 0      | G |
| 10 | BICF2P1361615           | 13165751 | 0 | 0    | 0      | G |
| 10 | BICF2G630668529         | 13174412 | G | 0.75 | 0.4286 | A |
| 10 | BICF2G630668517         | 13182072 | 0 | 0    | 0      | G |

|    |                         |          |   |      |        |   |
|----|-------------------------|----------|---|------|--------|---|
| 10 | BICF2P331954            | 13205131 | 0 | 0    | 0      | A |
| 10 | BICF2S23229133          | 13223901 | A | 0.25 | 0.5833 | G |
| 10 | BICF2S23411             | 13226026 | G | 0.25 | 0.5714 | A |
| 10 | TIGRP2P137537_rs9091258 | 13242211 | 0 | 0    | 0      | A |
| 10 | BICF2P34370             | 13259282 | G | 0.25 | 0.5714 | A |
| 10 | BICF2P1019601           | 13268339 | A | 0.25 | 0.5714 | G |
| 10 | BICF2G630668495         | 13279482 | A | 0.25 | 0.5714 | T |
| 10 | BICF2G630668488         | 13285695 | A | 0.25 | 0.5714 | G |
| 10 | BICF2G630668472         | 13299435 | G | 0.75 | 0.4286 | A |
| 10 | BICF2G630668466         | 13308894 | A | 0.25 | 0.5714 | G |
| 10 | BICF2G630668441         | 13329297 | G | 0.25 | 0.5714 | A |
| 10 | BICF2G630668432         | 13340991 | C | 0.25 | 0.5714 | A |
| 10 | BICF2G630668424         | 13362953 | A | 0.75 | 0.4167 | G |
| 10 | BICF2P423122            | 13365218 | 0 | 0    | 0      | A |
| 10 | BICF2G630668422         | 13393452 | A | 0.25 | 0.5714 | G |
| 10 | BICF2G630668412         | 13407526 | A | 0    | 0      | G |
| 10 | BICF2P674965            | 13414808 | A | 0.75 | 0.4286 | G |
| 10 | BICF2S23326440          | 13422512 | A | 0.75 | 0.4286 | G |
| 10 | BICF2P1237568           | 13435580 | A | 0.75 | 0.4286 | C |
| 10 | BICF2P1439928           | 13439502 | A | 0.75 | 0.4286 | G |
| 10 | BICF2G630668401         | 13447215 | A | 1    | 1      | C |
| 10 | BICF2G630668397         | 13460870 | G | 0    | 0      | A |
| 10 | BICF2G630668391         | 13467963 | A | 0.75 | 0.4286 | G |
| 10 | BICF2G630668366         | 13478082 | G | 0.25 | 0.5714 | A |
| 10 | BICF2S23441254          | 13491773 | G | 0    | 0      | A |
| 10 | BICF2G630668349         | 13502579 | G | 0.25 | 0.5714 | A |
| 10 | BICF2G630668347         | 13520959 | C | 0.25 | 0.5714 | G |
| 10 | BICF2G630668346         | 13525238 | C | 0    | 0      | A |
| 10 | BICF2S23144055          | 13542709 | A | 0    | 0      | G |
| 10 | BICF2G630668338         | 13547701 | G | 1    | 1      | A |
| 10 | BICF2G630668330         | 13553752 | G | 1    | 1      | A |
| 10 | BICF2G630668329         | 13559026 | G | 0    | 0      | A |
| 10 | BICF2G630668296         | 13579391 | A | 1    | 1      | G |
| 10 | BICF2G630668289         | 13582865 | C | 1    | 1      | A |
| 10 | BICF2G630668270         | 13620103 | A | 1    | 1      | G |
| 10 | BICF2P237994            | 13637244 | G | 0.25 | 0.5714 | A |
| 10 | BICF2S22910944          | 13639100 | A | 0.75 | 0.4286 | C |
| 10 | BICF2G630668267         | 13660508 | 0 | 0    | 0      | A |
| 10 | BICF2P1122201           | 13666858 | A | 1    | 1      | G |
| 10 | BICF2P678176            | 13674441 | A | 0    | 0      | G |
| 10 | BICF2G630668240         | 13704607 | A | 0    | 0      | G |
| 10 | BICF2G630668224         | 13723824 | G | 0    | 0      | A |
| 10 | BICF2G630668213         | 13738599 | G | 0    | 0      | A |
| 10 | BICF2G630668210         | 13743536 | A | 0    | 0      | G |
| 10 | BICF2P1024825           | 13796955 | 0 | 0    | 0      | A |
| 10 | BICF2S23650439          | 13818508 | C | 0    | 0      | A |
| 10 | BICF2G630668204         | 13824615 | 0 | 0    | 0      | G |

|    |                         |          |   |      |        |   |
|----|-------------------------|----------|---|------|--------|---|
| 10 | BICF2P276510            | 13836709 | C | 0    | 0      | A |
| 10 | TIGRP2P137554_rs8940107 | 13866660 | 0 | 0    | 0      | G |
| 10 | BICF2P225410            | 13881530 | A | 0.75 | 0.4286 | G |
| 10 | BICF2G630668174         | 13894577 | A | 0.25 | 0.5714 | G |
| 10 | BICF2S23539555          | 13917465 | T | 0    | 0      | A |
| 10 | BICF2P1345080           | 13927879 | A | 0.75 | 0.4286 | C |
| 10 | BICF2P42472             | 13942585 | A | 0.25 | 0.5714 | G |
| 10 | BICF2P908302            | 13949772 | A | 0.75 | 0.4286 | G |
| 10 | BICF2P626862            | 13968079 | A | 0.75 | 0.4286 | G |
| 10 | BICF2P371545            | 13976454 | G | 0.75 | 0.4286 | A |
| 10 | BICF2S23243159          | 13987009 | A | 0.25 | 0.5714 | G |
| 10 | BICF2G630668130         | 13998098 | G | 0.25 | 0.5714 | A |
| 10 | BICF2P1032483           | 14009725 | A | 0.75 | 0.4286 | G |
| 10 | BICF2G630668104         | 14020175 | G | 1    | 1      | A |
| 10 | BICF2G630668095         | 14039967 | A | 0.25 | 0.5714 | G |
| 10 | BICF2G630668089         | 14046241 | A | 0.25 | 0.5714 | G |
| 10 | BICF2P436672            | 14053580 | A | 1    | 1      | T |
| 10 | BICF2G630668076         | 14070997 | G | 1    | 1      | A |
| 10 | BICF2G630668052         | 14087517 | A | 0.25 | 0.5714 | G |
| 10 | BICF2P1197066           | 14098348 | A | 0    | 0      | C |
| 10 | BICF2G630668040         | 14099859 | G | 0    | 0      | A |
| 10 | BICF2P1096888           | 14118731 | G | 0.25 | 0.5714 | A |
| 10 | BICF2G630667991         | 14135199 | A | 0    | 0      | G |
| 10 | BICF2P862409            | 14155756 | C | 0    | 0      | A |
| 10 | BICF2P35801             | 14158514 | 0 | 0    | 0      | A |
| 10 | TIGRP2P137566_rs8762764 | 14170748 | 0 | 0    | 0      | G |
| 10 | BICF2P925611            | 14206472 | G | 0.25 | 0.5714 | A |
| 10 | BICF2P905176            | 14222517 | G | 0    | 0.5714 | A |
| 10 | BICF2P733198            | 14231693 | A | 0.75 | 0.4286 | G |
| 10 | BICF2P433765            | 14244786 | A | 0.75 | 0.4286 | G |
| 10 | BICF2S22945419          | 14252981 | A | 0.25 | 0.5714 | G |
| 10 | BICF2S23040335          | 14262537 | G | 0    | 0      | A |
| 10 | BICF2G630667968         | 14286174 | A | 1    | 1      | G |
| 10 | BICF2G630667949         | 14295681 | A | 1    | 1      | G |
| 10 | BICF2G630667934         | 14316840 | A | 0.75 | 0.4286 | G |
| 10 | BICF2G630667923         | 14322936 | G | 0.75 | 0.4286 | A |
| 10 | BICF2S23134379          | 14335427 | A | 0    | 0      | G |
| 10 | BICF2S23045534          | 14345241 | G | 1    | 0.4167 | A |
| 10 | BICF2S22918652          | 14355368 | G | 1    | 1      | A |
| 10 | BICF2S2317283           | 14394798 | A | 0    | 0      | G |
| 10 | BICF2S23158988          | 14419170 | C | 0    | 0      | G |
| 10 | BICF2P330466            | 14426510 | 0 | 0    | 0      | A |
| 10 | TIGRP2P137572_rs8566283 | 14442848 | 0 | 0    | 0      | C |
| 10 | BICF2P550031            | 14463429 | 0 | 0    | 0      | A |
| 10 | BICF2S23154039          | 14500275 | G | 0    | 0      | A |
| 10 | BICF2P570400            | 14530023 | 0 | 0    | 0      | A |
| 10 | BICF2P1003918           | 14549034 | 0 | 0    | 0      | A |

|    |                         |          |   |      |        |   |
|----|-------------------------|----------|---|------|--------|---|
| 10 | BICF2S2317764           | 14561346 | A | 0.25 | 0.5714 | G |
| 10 | BICF2P324173            | 14577265 | C | 0.75 | 0.4167 | A |
| 10 | BICF2S23620390          | 14587412 | G | 1    | 1      | A |
| 10 | BICF2G630667894         | 14592309 | A | 0    | 0      | G |
| 10 | BICF2G630667877         | 14598429 | G | 0.25 | 0.2143 | A |
| 10 | BICF2G630667842         | 14609443 | A | 0    | 0      | G |
| 10 | BICF2G630667834         | 14619808 | A | 0.75 | 0.7857 | G |
| 10 | BICF2G630667810         | 14635274 | A | 0.75 | 0.7857 | G |
| 10 | BICF2G630667800         | 14647541 | G | 0.25 | 0.2143 | A |
| 10 | BICF2P1029753           | 14652828 | C | 0    | 0      | A |
| 10 | BICF2P1354152           | 14663415 | G | 0.25 | 0.2143 | A |
| 10 | BICF2G630667793         | 14687389 | 0 | 0    | 0      | G |
| 10 | BICF2G630667787         | 14704641 | A | 0    | 0      | G |
| 10 | BICF2G630667780         | 14710804 | A | 0.25 | 0.2143 | G |
| 10 | BICF2G630667763         | 14723990 | A | 0    | 0      | G |
| 10 | BICF2P877782            | 14730825 | G | 0    | 0      | C |
| 10 | BICF2P877783            | 14730844 | C | 0.25 | 0.5714 | A |
| 10 | BICF2G630667760         | 14733437 | A | 0    | 0      | G |
| 10 | BICF2P908662            | 14744518 | A | 0    | 0      | G |
| 10 | BICF2G630667758         | 14757231 | G | 0.75 | 0.4167 | A |
| 10 | BICF2G630667757         | 14771007 | A | 0.25 | 0.2143 | G |
| 10 | BICF2G630667742         | 14783513 | A | 0.25 | 0.2143 | G |
| 10 | BICF2G630667740         | 14786216 | A | 0.25 | 0.2143 | G |
| 10 | BICF2G630667726         | 14793883 | A | 0.25 | 0.2143 | G |
| 10 | BICF2G630667700         | 14801680 | G | 0.25 | 0.2143 | A |
| 10 | BICF2P942975            | 14814155 | G | 0.25 | 0.2143 | A |
| 10 | BICF2P540345            | 14825638 | G | 0    | 0      | A |
| 10 | BICF2P842328            | 14836058 | A | 0.25 | 0.2143 | G |
| 10 | BICF2P747070            | 14855306 | C | 0.25 | 0.2143 | A |
| 10 | BICF2G630667682         | 14866792 | G | 0    | 0      | A |
| 10 | BICF2P652856            | 14879058 | A | 0.25 | 0.2143 | G |
| 10 | BICF2P670634            | 14887963 | G | 0    | 0      | A |
| 10 | BICF2P1270684           | 14898479 | G | 0    | 0      | A |
| 10 | BICF2P805802            | 14909147 | A | 0    | 0      | G |
| 10 | BICF2P676270            | 14916418 | C | 0.25 | 0.2143 | A |
| 10 | BICF2P1256108           | 14928083 | 0 | 0    | 0      | A |
| 10 | BICF2P485070            | 14946366 | G | 0.25 | 0.2143 | A |
| 10 | BICF2P572633            | 14951709 | A | 0    | 0      | G |
| 10 | BICF2P112319            | 14966622 | 0 | 0    | 0      | A |
| 10 | BICF2P111969            | 14974756 | G | 0    | 0      | A |
| 10 | BICF2P943137            | 14990547 | 0 | 0    | 0      | C |
| 10 | BICF2G630667678         | 14999307 | A | 0    | 0      | G |
| 10 | BICF2P1199199           | 15011326 | 0 | 0    | 0      | G |
| 10 | BICF2P286584            | 15024451 | 0 | 0    | 0      | C |
| 10 | BICF2P194220            | 15039777 | A | 0    | 0      | G |
| 10 | TIGRP2P137578_rs8693500 | 15050376 | 0 | 0    | 0      | A |
| 10 | BICF2P1011013           | 15061712 | A | 0    | 0      | G |



|    |                 |          |   |      |        |   |
|----|-----------------|----------|---|------|--------|---|
| 10 | BICF2P138871    | 15065505 | A | 0    | 0      | G |
| 10 | BICF2P704528    | 15082379 | C | 0    | 0      | G |
| 10 | BICF2P806163    | 15105763 | G | 0    | 0      | A |
| 10 | BICF2P838659    | 15119421 | 0 | 0    | 0      | A |
| 10 | BICF2P1188502   | 15139583 | A | 0    | 0      | C |
| 10 | BICF2P1029924   | 15148009 | A | 0.25 | 0.2143 | G |
| 10 | BICF2G630667674 | 15159529 | 0 | 0    | 0      | C |
| 10 | BICF2P597618    | 15169258 | G | 0    | 0      | A |
| 10 | BICF2G630667669 | 15181707 | A | 0    | 0      | G |
| 10 | BICF2G630667632 | 15193131 | A | 0    | 0      | G |
| 10 | BICF2G630667624 | 15196945 | A | 0    | 0      | G |
| 10 | BICF2P431692    | 15214424 | C | 0    | 0      | G |
| 10 | BICF2G630667599 | 15224543 | A | 0    | 0      | G |
| 10 | BICF2G630667590 | 15233406 | A | 1    | 1      | G |
| 10 | BICF2G630667586 | 15237930 | G | 0    | 0      | A |
| 10 | BICF2G630667573 | 15245622 | A | 1    | 1      | G |
| 10 | BICF2G630667553 | 15257061 | A | 1    | 1      | G |
| 10 | BICF2G630667541 | 15267767 | C | 1    | 1      | A |
| 10 | BICF2G630667526 | 15274350 | A | 1    | 1      | G |
| 10 | BICF2G630667484 | 15292459 | A | 0.75 | 0.7857 | G |
| 10 | BICF2P774079    | 15296179 | A | 0.75 | 0.7857 | G |
| 10 | BICF2P343272    | 15315750 | C | 0    | 0      | A |
| 10 | BICF2P698767    | 15318065 | G | 0    | 0      | A |
| 10 | BICF2P679740    | 15332669 | A | 0    | 0      | G |
| 10 | BICF2S23022684  | 15349046 | G | 1    | 1      | A |
| 10 | BICF2S23334975  | 15354718 | G | 1    | 1      | A |
| 10 | BICF2S23246912  | 15365121 | G | 0.25 | 0.2143 | A |
| 10 | BICF2P1128052   | 15384112 | A | 0    | 0      | G |
| 10 | BICF2P1128045   | 15385859 | A | 0    | 0      | C |
| 10 | BICF2G630667469 | 15395831 | G | 0.25 | 0.2143 | A |
| 10 | BICF2G630667450 | 15404277 | A | 0.25 | 0.2143 | C |
| 10 | BICF2G630667436 | 15415392 | C | 0.25 | 0.2143 | A |
| 10 | BICF2G630667430 | 15436471 | A | 0.25 | 0.2143 | G |
| 10 | BICF2G630667420 | 15445695 | A | 0.25 | 0.2143 | G |
| 10 | BICF2P1096891   | 15458495 | A | 0.25 | 0.2143 | G |
| 10 | BICF2P444343    | 15469812 | A | 0.25 | 0.2143 | G |
| 10 | BICF2S22938867  | 15479419 | A | 1    | 1      | G |
| 10 | BICF2P800963    | 15500806 | A | 0.75 | 0.7857 | G |
| 10 | BICF2G630667403 | 15503081 | A | 1    | 1      | G |
| 10 | BICF2S23418846  | 15514095 | A | 0    | 0      | G |
| 10 | BICF2G630667354 | 15534933 | A | 0.25 | 0.2143 | G |
| 10 | BICF2G630667349 | 15541329 | C | 0.75 | 0.7857 | A |
| 10 | BICF2G630667333 | 15551793 | C | 0.25 | 0.2143 | A |
| 10 | BICF2G630667328 | 15560171 | A | 0    | 0.2143 | G |
| 10 | BICF2G630667320 | 15577089 | G | 0    | 0      | A |
| 10 | BICF2P948334    | 15597114 | 0 | 0    | 0      | G |
| 10 | BICF2G630667318 | 15612355 | G | 0.25 | 0.2143 | A |

|    |                         |          |   |      |        |   |
|----|-------------------------|----------|---|------|--------|---|
| 10 | BICF2G630667309         | 15619329 | A | 0    | 0      | T |
| 10 | BICF2P229848            | 15632262 | G | 0    | 0      | A |
| 10 | BICF2G630667295         | 15640791 | A | 0    | 0      | G |
| 10 | BICF2G630667282         | 15654324 | G | 0    | 0      | A |
| 10 | BICF2S23027779          | 15673428 | 0 | 0    | 0      | G |
| 10 | G582f57S210             | 15703080 | 0 | 0    | 0      | C |
| 10 | BICF2S23540228          | 15728316 | A | 0    | 0      | T |
| 10 | BICF2S23540229          | 15728385 | A | 0    | 0      | G |
| 10 | BICF2G630667271         | 15732144 | A | 0    | 0      | G |
| 10 | BICF2G630667270         | 15745043 | G | 0    | 0      | A |
| 10 | BICF2G630667267         | 15764876 | A | 0    | 0.1    | C |
| 10 | BICF2G630667258         | 15768624 | G | 0.25 | 0.2143 | A |
| 10 | BICF2S22928326          | 15783294 | G | 0.75 | 0.7857 | A |
| 10 | BICF2P1153772           | 15793705 | 0 | 0    | 0      | A |
| 10 | BICF2S23332874          | 15802720 | A | 0    | 0      | G |
| 10 | BICF2S23449675          | 15845592 | C | 0.75 | 0.7857 | A |
| 10 | BICF2S23121948          | 15850511 | A | 0.75 | 0.7857 | G |
| 10 | BICF2S23137905          | 15871322 | A | 0.75 | 0.7857 | G |
| 10 | BICF2S23327520          | 15885341 | G | 0.75 | 0.7857 | A |
| 10 | BICF2S23914543          | 15898074 | A | 0.75 | 0.7857 | G |
| 10 | BICF2S2352970           | 15937763 | A | 0.25 | 0.2143 | G |
| 10 | BICF2P193782            | 15942188 | 0 | 0    | 0      | G |
| 10 | BICF2S23758184          | 15959375 | 0 | 0    | 0      | G |
| 10 | BICF2P298929            | 15976246 | 0 | 0    | 0      | A |
| 10 | BICF2S22926474          | 15999486 | A | 0.75 | 0.9    | C |
| 10 | BICF2S22957237          | 16018920 | 0 | 0    | 0      | G |
| 10 | BICF2G630667248         | 16023583 | G | 1    | 1      | A |
| 10 | BICF2G630667230         | 16037535 | G | 0    | 0      | A |
| 10 | BICF2G630667217         | 16043582 | 0 | 0    | 0      | G |
| 10 | BICF2G630667211         | 16064170 | C | 0.25 | 0.2143 | A |
| 10 | BICF2G630667209         | 16066544 | A | 0    | 0      | G |
| 10 | BICF2S23015473          | 16106234 | A | 0.25 | 0.2143 | G |
| 10 | BICF2P980513            | 16112361 | 0 | 0    | 0      | C |
| 10 | TIGRP2P137591_rs9085346 | 16127011 | 0 | 0    | 0      | C |
| 10 | BICF2S23761887          | 16144389 | G | 0.25 | 0.2143 | A |
| 10 | BICF2S2333447           | 16148959 | G | 0.5  | 0.2143 | A |
| 10 | BICF2S2366112           | 16160953 | 0 | 0    | 0      | A |
| 10 | BICF2P1432014           | 16170068 | 0 | 0    | 0      | A |
| 10 | BICF2S23121173          | 16223936 | A | 0    | 0      | G |
| 10 | BICF2G630667201         | 16246762 | A | 0    | 0      | G |
| 10 | BICF2G630667190         | 16259823 | G | 0    | 0      | A |
| 10 | BICF2P624218            | 16285421 | 0 | 0    | 0      | G |
| 10 | BICF2G630667187         | 16300467 | A | 0.25 | 0.2143 | G |
| 10 | BICF2G630667186         | 16316212 | A | 0    | 0      | T |
| 10 | BICF2G630667184         | 16319313 | G | 0    | 0      | A |
| 10 | BICF2G630667175         | 16331014 | T | 0.25 | 0.2143 | A |
| 10 | BICF2S23717644          | 16355566 | A | 0.75 | 0.7857 | T |

|    |                 |          |   |      |        |   |
|----|-----------------|----------|---|------|--------|---|
| 10 | BICF2S23653696  | 16380544 | G | 0.75 | 0.7857 | A |
| 10 | BICF2S22954730  | 16398359 | G | 1    | 0.7857 | A |
| 10 | BICF2S23524544  | 16432202 | C | 0    | 0      | A |
| 10 | BICF2S24321914  | 16441352 | 0 | 0    | 0      | G |
| 10 | BICF2G630667158 | 16451919 | A | 0.5  | 0.2143 | G |
| 10 | BICF2G630667148 | 16462260 | A | 1    | 1      | G |
| 10 | BICF2G630667147 | 16462406 | C | 0    | 0      | A |
| 10 | BICF2G630667138 | 16471769 | A | 1    | 1      | C |
| 10 | BICF2G630667127 | 16483223 | A | 0    | 0      | G |
| 10 | BICF2S2318921   | 16497053 | T | 0    | 0      | A |
| 10 | BICF2G630667097 | 16504746 | G | 0    | 0      | A |
| 10 | BICF2G630667084 | 16519195 | G | 0    | 0      | A |
| 10 | BICF2G630667069 | 16526194 | A | 0    | 0      | G |
| 10 | BICF2P700052    | 16540001 | G | 0    | 0      | A |
| 10 | BICF2G630667045 | 16556165 | A | 0    | 0      | G |
| 10 | BICF2G630667044 | 16565405 | G | 0    | 0      | A |
| 10 | BICF2P943690    | 16599217 | 0 | 0    | 0      | A |
| 10 | BICF2S24116722  | 16612931 | A | 0    | 0      | C |
| 10 | BICF2S22958804  | 16623424 | A | 0    | 0      | G |
| 10 | BICF2S23228113  | 16674345 | A | 0    | 0      | G |
| 10 | BICF2G630667039 | 16678898 | C | 0    | 0      | A |
| 10 | BICF2G630667020 | 16693407 | A | 0.25 | 0.2143 | C |
| 10 | BICF2P430809    | 16712932 | A | 0.25 | 0.2143 | G |
| 10 | BICF2G630666990 | 16722796 | G | 0.25 | 0.2143 | A |
| 10 | BICF2G630666978 | 16740741 | A | 0.25 | 0.5714 | G |
| 10 | BICF2S23754748  | 16749953 | A | 0.25 | 0.2143 | G |
| 10 | BICF2G630666959 | 16759520 | G | 0.25 | 0.2143 | A |
| 10 | BICF2G630666936 | 16767377 | A | 0.25 | 0.2143 | G |
| 10 | BICF2G630666924 | 16786588 | A | 0.25 | 0.2143 | C |
| 10 | BICF2G630666923 | 16811309 | A | 0    | 0      | G |
| 10 | BICF2G630666921 | 16826764 | G | 0    | 0      | A |
| 10 | BICF2G630666905 | 16885083 | A | 0    | 0      | G |
| 10 | BICF2G630666879 | 16905510 | A | 0    | 0      | G |
| 10 | BICF2G630666850 | 16935660 | G | 0.5  | 0.7857 | A |
| 10 | BICF2G630666821 | 16946158 | G | 0.5  | 0.7857 | A |
| 10 | BICF2G630666809 | 16951620 | G | 0.5  | 0.7857 | A |
| 10 | BICF2G630666784 | 16970379 | A | 0.25 | 0.2143 | G |
| 10 | BICF2P1171453   | 16974417 | G | 0    | 0      | A |
| 10 | BICF2P1002669   | 16993092 | A | 0.25 | 0.5714 | G |
| 10 | BICF2P480785    | 16998762 | 0 | 0    | 0      | A |
| 10 | BICF2P1312747   | 17008951 | A | 0.25 | 0.2143 | G |
| 10 | BICF2P319736    | 17013332 | A | 0.25 | 0.2143 | G |
| 10 | BICF2S23026580  | 17031330 | A | 0    | 0      | G |
| 10 | BICF2S23427952  | 17041649 | A | 0    | 0      | C |
| 10 | BICF2P1203806   | 17054023 | G | 0    | 0      | A |
| 10 | BICF2P682501    | 17064643 | A | 0    | 0      | C |
| 10 | BICF2S23550470  | 17072470 | A | 0    | 0      | G |

|    |                 |          |   |      |        |   |
|----|-----------------|----------|---|------|--------|---|
| 10 | BICF2P1130065   | 17083696 | A | 0    | 0      | G |
| 10 | BICF2G630666775 | 17083986 | A | 0    | 0      | G |
| 10 | BICF2P814692    | 17092363 | G | 0.25 | 0.1    | A |
| 10 | BICF2G630666763 | 17092525 | A | 0    | 0      | G |
| 10 | BICF2P370304    | 17104743 | G | 0.5  | 0.7857 | A |
| 10 | BICF2P830613    | 17116744 | 0 | 0    | 0      | G |
| 10 | BICF2G630666734 | 17131554 | G | 0    | 0      | A |
| 10 | BICF2G630666708 | 17139501 | A | 0    | 0      | G |
| 10 | BICF2G630666694 | 17146552 | C | 0    | 0      | A |
| 10 | BICF2P636946    | 17161543 | A | 0    | 0      | G |
| 10 | BICF2S23232930  | 17165696 | A | 0    | 0      | G |
| 10 | BICF2S23229186  | 17169611 | A | 0    | 0      | G |
| 10 | BICF2G630666617 | 17210241 | A | 0    | 0      | G |
| 10 | BICF2G630666613 | 17215776 | A | 0    | 0      | G |
| 10 | BICF2S23550198  | 17231288 | A | 0.5  | 0.2143 | G |
| 10 | BICF2S2315987   | 17242209 | A | 0    | 0      | G |
| 10 | BICF2S22962514  | 17256141 | A | 0.5  | 0.7857 | G |
| 10 | BICF2G630666603 | 17266999 | A | 0    | 0      | G |
| 10 | BICF2G630666597 | 17270177 | C | 0.25 | 0.2143 | A |
| 10 | BICF2G630666589 | 17273336 | A | 0.5  | 0.2143 | G |
| 10 | BICF2G630666581 | 17303422 | A | 0.25 | 0.2143 | G |
| 10 | BICF2G630666576 | 17323502 | A | 0.25 | 0.5714 | C |
| 10 | BICF2G630666574 | 17331902 | G | 0    | 0      | A |
| 10 | BICF2G630666565 | 17352396 | C | 0    | 0      | A |
| 10 | BICF2G630666561 | 17355738 | A | 0    | 0      | G |
| 10 | BICF2G630666560 | 17379124 | A | 0.25 | 0.2143 | T |
| 10 | BICF2G630666550 | 17409201 | A | 0    | 0      | G |
| 10 | BICF2P885725    | 17414241 | T | 0.25 | 0.5714 | A |
| 10 | BICF2G630666532 | 17422812 | G | 0.25 | 0.5833 | A |
| 10 | BICF2P663407    | 17435056 | A | 0.5  | 0.2143 | G |
| 10 | BICF2G630666504 | 17446261 | G | 0.75 | 0.7857 | A |
| 10 | BICF2G630666490 | 17460628 | C | 0    | 0      | G |
| 10 | BICF2G630666477 | 17476560 | G | 0.5  | 0.2143 | A |
| 10 | BICF2G630666471 | 17480744 | G | 0.5  | 0.2143 | A |
| 10 | BICF2S23625861  | 17497583 | C | 0.75 | 0.7857 | A |
| 10 | BICF2S23041688  | 17503071 | A | 0.5  | 0.2143 | G |
| 10 | BICF2S23728697  | 17520668 | A | 0.75 | 0.7857 | G |
| 10 | BICF2S23157783  | 17533939 | G | 0.25 | 0.5714 | A |
| 10 | BICF2S23737487  | 17539889 | G | 0.25 | 0.5714 | A |
| 10 | BICF2G630666460 | 17559638 | A | 0    | 0.2143 | G |
| 10 | BICF2P1367712   | 17580409 | 0 | 0    | 0      | G |
| 10 | BICF2P437553    | 17594295 | 0 | 0    | 0      | A |
| 10 | BICF2P663111    | 17604837 | A | 0.25 | 0.5714 | C |
| 10 | BICF2P179049    | 17607430 | G | 0.25 | 0.5714 | A |
| 10 | BICF2G630666420 | 17627841 | T | 0.5  | 0.2143 | A |
| 10 | BICF2G630666416 | 17630102 | A | 0.5  | 0.2143 | G |
| 10 | BICF2G630666383 | 17650587 | G | 0.5  | 0.2143 | A |

|    |                         |          |   |      |        |   |
|----|-------------------------|----------|---|------|--------|---|
| 10 | BICF2G630666382         | 17650691 | A | 0.5  | 0.2143 | G |
| 10 | BICF2G630666374         | 17658530 | G | 0.5  | 0.2143 | A |
| 10 | BICF2G630666362         | 17672724 | G | 0.5  | 0.2143 | A |
| 10 | BICF2G630666354         | 17677149 | G | 0.5  | 0.2143 | A |
| 10 | BICF2G630666350         | 17692480 | G | 0.5  | 0.2143 | A |
| 10 | BICF2S23740201          | 17702587 | A | 0.25 | 0.5714 | C |
| 10 | BICF2P660001            | 17723309 | 0 | 0    | 0      | T |
| 10 | BICF2G630666346         | 17739364 | A | 0.25 | 0.2143 | G |
| 10 | BICF2P199657            | 17768086 | 0 | 0    | 0      | G |
| 10 | TIGRP2P137613_rs9009665 | 17780502 | 0 | 0    | 0      | G |
| 10 | BICF2S23629669          | 17791566 | G | 0    | 0      | A |
| 10 | BICF2S23024485          | 17820998 | G | 0.5  | 0.2143 | C |
| 10 | BICF2G630666341         | 17852072 | G | 0    | 0      | A |
| 10 | BICF2P1148357           | 17861375 | A | 0    | 0      | G |
| 10 | BICF2S23444542          | 17880581 | G | 0    | 0      | A |
| 10 | BICF2P991910            | 17882879 | A | 0    | 0      | G |
| 10 | BICF2G630666331         | 17894824 | G | 0.25 | 0.5714 | A |
| 10 | BICF2P674656            | 17911769 | A | 0    | 0      | G |
| 10 | BICF2P13254             | 17925536 | 0 | 0    | 0      | A |
| 10 | BICF2P1309651           | 17930054 | G | 0    | 0      | A |
| 10 | BICF2G630666323         | 17950308 | 0 | 0    | 0      | A |
| 10 | BICF2P1136930           | 17955545 | G | 0    | 0      | A |
| 10 | BICF2P1023950           | 17970776 | A | 0    | 0      | G |
| 10 | BICF2P808639            | 17975003 | T | 0    | 0      | A |
| 10 | BICF2P460601            | 17987522 | A | 0.5  | 0.2143 | G |
| 10 | BICF2P137153            | 18007211 | G | 0    | 0      | A |
| 10 | BICF2P502550            | 18015762 | A | 0    | 0      | G |
| 10 | BICF2G630666316         | 18026427 | A | 0    | 0      | G |
| 10 | BICF2G630666314         | 18035201 | A | 0    | 0      | G |
| 10 | BICF2G630666307         | 18047809 | A | 0.5  | 0.2143 | G |
| 10 | BICF2G630666291         | 18057413 | A | 0.5  | 0.2143 | G |
| 10 | BICF2G630666272         | 18067610 | G | 0.5  | 0.2143 | A |
| 10 | BICF2G630666261         | 18078970 | G | 0    | 0      | A |
| 10 | BICF2G630666249         | 18093228 | C | 0    | 0      | A |
| 10 | BICF2P11721             | 18102432 | A | 0.5  | 0.2143 | C |
| 10 | TIGRP2P137635_rs8614929 | 18116461 | A | 0.5  | 0.2143 | G |
| 10 | BICF2P1292368           | 18124216 | A | 0    | 0      | G |
| 10 | BICF2G630666217         | 18141270 | A | 0.5  | 0.2143 | G |
| 10 | BICF2G630666199         | 18147298 | C | 0    | 0      | A |
| 10 | BICF2P917004            | 18162839 | G | 0.5  | 0.2143 | A |
| 10 | BICF2G630666183         | 18178040 | A | 0    | 0      | G |
| 10 | BICF2S2335347           | 18192975 | A | 0.5  | 0.7857 | C |
| 10 | BICF2G630666158         | 18195616 | A | 0    | 0      | G |
| 10 | BICF2G630666147         | 18215462 | A | 0.5  | 0.2143 | G |
| 10 | BICF2G630666146         | 18216075 | G | 0.5  | 0.7857 | A |
| 10 | BICF2P786503            | 18234270 | 0 | 0    | 0      | A |
| 10 | BICF2G630666129         | 18239835 | A | 0.5  | 0.7857 | G |

|    |                         |          |   |     |        |   |
|----|-------------------------|----------|---|-----|--------|---|
| 10 | BICF2G630666109         | 18252782 | A | 0.5 | 0.2143 | G |
| 10 | BICF2G630666082         | 18264781 | G | 0.5 | 0.2143 | A |
| 10 | BICF2S23642204          | 18279051 | A | 0   | 0      | C |
| 10 | BICF2P731432            | 18291026 | A | 0   | 0      | C |
| 10 | BICF2G630666065         | 18291749 | G | 0.5 | 0.2143 | A |
| 10 | BICF2G630666051         | 18293942 | A | 0.5 | 0.2143 | G |
| 10 | BICF2P826040            | 18306317 | G | 0.5 | 0.2143 | A |
| 10 | BICF2G630666017         | 18320326 | G | 0.5 | 0.7857 | A |
| 10 | BICF2G630666007         | 18336207 | A | 0.5 | 0.7857 | G |
| 10 | BICF2G630666005         | 18344084 | A | 0   | 0      | C |
| 10 | BICF2S2309084           | 18361522 | C | 0   | 0      | A |
| 10 | BICF2G630665999         | 18375253 | A | 0   | 0      | G |
| 10 | BICF2S2328886           | 18380480 | G | 0.5 | 0.2143 | A |
| 10 | BICF2G630665985         | 18389766 | A | 0.5 | 0.7857 | C |
| 10 | BICF2G630665970         | 18401415 | A | 0.5 | 0.7857 | G |
| 10 | BICF2G630665959         | 18421071 | G | 0   | 0      | A |
| 10 | BICF2G630665950         | 18428031 | G | 0   | 0      | A |
| 10 | BICF2G630665944         | 18432109 | A | 0.5 | 0.7857 | G |
| 10 | BICF2S23340292          | 18439038 | A | 0.5 | 0.8333 | G |
| 10 | BICF2G630665925         | 18448668 | A | 0   | 0      | C |
| 10 | BICF2G630665899         | 18457689 | A | 0   | 0      | G |
| 10 | BICF2G630665865         | 18480319 | A | 0.5 | 0.7857 | C |
| 10 | BICF2S23222684          | 18484499 | A | 0   | 0      | G |
| 10 | BICF2G630665860         | 18498511 | T | 0.5 | 0.7857 | A |
| 10 | BICF2G630665853         | 18532922 | G | 0.5 | 0.7857 | A |
| 10 | BICF2G630665845         | 18546343 | A | 0.5 | 0.7857 | G |
| 10 | BICF2G630665832         | 18553547 | A | 0.5 | 0.7857 | G |
| 10 | BICF2P725595            | 18567472 | 0 | 0   | 0      | C |
| 10 | BICF2P1022253           | 18581523 | 0 | 0   | 0      | A |
| 10 | BICF2P231798            | 18586898 | 0 | 0   | 0      | C |
| 10 | BICF2G630665824         | 18603448 | A | 0.5 | 0.2143 | G |
| 10 | BICF2G630665816         | 18613158 | T | 0.5 | 0.2143 | A |
| 10 | BICF2G630665810         | 18621559 | C | 0.5 | 0.2143 | A |
| 10 | BICF2G630665797         | 18634408 | G | 0.5 | 0.1667 | A |
| 10 | BICF2G630665795         | 18645753 | G | 0.5 | 0.7857 | A |
| 10 | G583f55S106             | 18670967 | C | 0.5 | 0.7857 | A |
| 10 | BICF2P346324            | 18727191 | 0 | 0   | 0      | C |
| 10 | BICF2P1034991           | 18735057 | G | 0   | 0      | A |
| 10 | BICF2S2342163           | 18755730 | A | 0   | 0      | G |
| 10 | TIGRP2P137654_rs8704941 | 18767228 | 0 | 0   | 0      | A |
| 10 | TIGRP2P137655_rs8855366 | 18780812 | 0 | 0   | 0      | G |
| 10 | BICF2G630665793         | 18825019 | A | 0   | 0      | G |
| 10 | BICF2P554488            | 18832269 | 0 | 0   | 0      | A |
| 10 | BICF2P739798            | 18848828 | 0 | 0   | 0      | A |
| 10 | BICF2G630665791         | 18865245 | A | 0   | 0      | T |
| 10 | BICF2P384885            | 18905016 | 0 | 0   | 0      | C |
| 10 | BICF2P145394            | 18912256 | 0 | 0   | 0      | A |

|    |                         |          |   |     |        |   |
|----|-------------------------|----------|---|-----|--------|---|
| 10 | BICF2S23633219          | 18956435 | A | 0.5 | 0.7857 | G |
| 10 | BICF2G630665788         | 18970933 | A | 0   | 0      | G |
| 10 | BICF2P129067            | 18976228 | 0 | 0   | 0      | A |
| 10 | TIGRP2P137865_rs8655603 | 19066039 | 0 | 0   | 0      | A |
| 10 | TIGRP2P138053_rs8699336 | 19108435 | 0 | 0   | 0      | A |
| 10 | BICF2P1142106           | 19251815 | 0 | 0   | 0      | A |
| 10 | BICF2P1081130           | 19296074 | 0 | 0   | 0      | G |
| 10 | BICF2G630665516         | 19314747 | A | 0   | 0      | G |
| 10 | TIGRP2P138510_rs9185689 | 19329009 | 0 | 0   | 0      | C |
| 10 | TIGRP2P138525_rs8752959 | 19340473 | 0 | 0   | 0      | G |
| 10 | TIGRP2P138549_rs8758853 | 19350605 | 0 | 0   | 0      | C |
| 10 | BICF2P981880            | 19360486 | 0 | 0   | 0      | G |
| 10 | TIGRP2P138558_rs8415316 | 19374850 | 0 | 0   | 0      | A |
| 10 | BICF2G630665434         | 19401408 | 0 | 0   | 0      | A |
| 10 | BICF2S23642383          | 19412316 | A | 1   | 1      | G |
| 10 | BICF2P367563            | 19453514 | 0 | 0   | 0      | A |
| 10 | BICF2P165847            | 19547095 | A | 0   | 0      | G |
| 10 | BICF2G630476105         | 19554997 | A | 0   | 0      | G |
| 10 | BICF2S23661386          | 19568635 | A | 0   | 0      | G |
| 10 | BICF2G630476114         | 19603863 | A | 0   | 0      | C |
| 10 | BICF2P27466             | 19608952 | 0 | 0   | 0      | G |
| 10 | BICF2P899132            | 19627237 | 0 | 0   | 0      | G |
| 10 | BICF2G630476115         | 19632084 | A | 0   | 0      | G |
| 10 | BICF2G630476118         | 19690960 | A | 0   | 0      | G |
| 10 | BICF2P550469            | 19732537 | 0 | 0   | 0      | G |
| 10 | BICF2G630476119         | 19749018 | A | 0   | 0      | G |
| 10 | BICF2P271043            | 19773318 | A | 0   | 0      | G |
| 10 | BICF2S2372888           | 19781210 | G | 1   | 1      | A |
| 10 | BICF2P365143            | 19791824 | A | 0   | 0      | T |
| 10 | BICF2S23043071          | 19815401 | A | 0.5 | 0      | G |
| 10 | TIGRP2P138791_rs8654162 | 19827631 | 0 | 0   | 0      | C |
| 10 | TIGRP2P138792_rs9079833 | 19841914 | 0 | 0   | 0      | C |
| 10 | G585f41S202             | 19860072 | 0 | 0   | 0      | G |
| 10 | BICF2G630476123         | 19885370 | A | 0   | 0      | G |
| 10 | G586f25S4               | 19902950 | 0 | 0   | 0      | C |
| 10 | G586f28S199             | 19906689 | A | 1   | 1      | C |
| 10 | BICF2P1204119           | 19931662 | A | 0   | 0      | G |
| 10 | BICF2S23215334          | 19950451 | A | 1   | 1      | C |
| 10 | TIGRP2P138807_rs8629138 | 19957464 | 0 | 0   | 0      | C |
| 10 | TIGRP2P138808_rs9013281 | 19970295 | 0 | 0   | 0      | G |
| 10 | BICF2S23639100          | 19981268 | A | 0   | 0      | G |
| 10 | BICF2P1090644           | 19995790 | G | 0   | 0      | A |
| 10 | BICF2P1212855           | 20007598 | 0 | 0   | 0      | G |
| 10 | BICF2G630476131         | 20014765 | A | 0   | 0      | G |
| 10 | BICF2G630476132         | 20039109 | A | 1   | 1      | C |
| 10 | BICF2P804757            | 20045961 | 0 | 0   | 0      | A |
| 10 | BICF2G630476134         | 20075150 | A | 1   | 1      | G |

|    |                         |          |   |     |        |   |
|----|-------------------------|----------|---|-----|--------|---|
| 10 | TIGRP2P138810_rs9111077 | 20097325 | 0 | 0   | 0      | C |
| 10 | BICF2G630476136         | 20105887 | A | 0   | 0      | G |
| 10 | BICF2S23645267          | 20123248 | 0 | 0   | 0      | G |
| 10 | TIGRP2P138812_rs8921108 | 20128451 | 0 | 0   | 0      | G |
| 10 | BICF2P499870            | 20147895 | 0 | 0   | 0      | A |
| 10 | BICF2P1405215           | 20154780 | 0 | 0   | 0      | A |
| 10 | BICF2P647101            | 20163274 | A | 1   | 1      | C |
| 10 | G587f34S290             | 20184188 | A | 0   | 0      | G |
| 10 | BICF2G630476139         | 20203658 | A | 0   | 0      | C |
| 10 | BICF2S2367328           | 20231672 | C | 0.5 | 0.7857 | A |
| 10 | BICF2P376281            | 20271278 | A | 1   | 1      | G |
| 10 | BICF2G630476142         | 20286558 | A | 0   | 0      | G |
| 10 | BICF2G630476156         | 20303993 | G | 1   | 1      | A |
| 10 | BICF2G630476167         | 20320072 | G | 1   | 1      | A |
| 10 | BICF2G630476170         | 20323047 | G | 1   | 1      | A |
| 10 | BICF2P701741            | 20352017 | A | 1   | 1      | G |
| 10 | BICF2G630476178         | 20355685 | G | 0   | 0      | A |
| 10 | BICF2P400229            | 20357446 | A | 0   | 0      | G |
| 10 | BICF2P760594            | 20367034 | 0 | 0   | 0      | C |
| 10 | BICF2S22910335          | 20376337 | A | 1   | 1      | G |
| 10 | BICF2G630476217         | 20382900 | G | 1   | 1      | A |
| 10 | BICF2G630476218         | 20383008 | A | 0   | 0      | G |
| 10 | BICF2P1157786           | 20405433 | G | 0   | 0      | A |
| 10 | BICF2G630476268         | 20421439 | A | 0   | 0      | G |
| 10 | BICF2G630476296         | 20426969 | A | 0   | 0      | G |
| 10 | BICF2G630476338         | 20441780 | G | 0   | 0      | A |
| 10 | BICF2S23136386          | 20455293 | 0 | 0   | 0      | G |
| 10 | BICF2G630476365         | 20467377 | G | 1   | 1      | A |
| 10 | BICF2G630476380         | 20474964 | A | 1   | 1      | G |
| 10 | BICF2P887404            | 20488919 | 0 | 0   | 0      | C |
| 10 | BICF2G630476391         | 20503665 | 0 | 0   | 0      | C |
| 10 | BICF2S23431554          | 20521179 | G | 0   | 0      | A |
| 10 | BICF2S2323343           | 20535790 | A | 1   | 1      | G |
| 10 | BICF2S2293422           | 20539936 | G | 1   | 1      | A |
| 10 | BICF2S22917215          | 20556374 | C | 1   | 1      | A |
| 10 | BICF2S22917368          | 20571502 | G | 1   | 1      | A |
| 10 | BICF2S2299144           | 20575604 | G | 1   | 1      | A |
| 10 | BICF2G630476398         | 20594829 | 0 | 0   | 0      | A |
| 10 | BICF2S2312648           | 20597292 | A | 0   | 0      | G |
| 10 | BICF2S23753253          | 20615770 | G | 1   | 1      | A |
| 10 | BICF2S22964470          | 20625101 | A | 1   | 1      | G |
| 10 | BICF2S23633590          | 20632378 | G | 0   | 0      | A |
| 10 | BICF2G630476414         | 20647231 | A | 1   | 1      | G |
| 10 | BICF2G630476461         | 20663647 | G | 1   | 1      | A |
| 10 | BICF2G630476474         | 20674545 | A | 1   | 1      | G |
| 10 | BICF2P206086            | 20682248 | G | 0   | 0      | A |
| 10 | BICF2G630476537         | 20695147 | C | 0   | 0      | A |



|    |                         |          |   |      |        |   |
|----|-------------------------|----------|---|------|--------|---|
| 10 | BICF2P408249            | 20711058 | G | 0    | 0      | A |
| 10 | BICF2G630476615         | 20717890 | 0 | 0    | 0      | G |
| 10 | BICF2G630476696         | 20732911 | C | 0    | 0      | A |
| 10 | BICF2G630476734         | 20737727 | A | 0    | 0      | G |
| 10 | BICF2S23762716          | 20746370 | A | 0    | 0      | G |
| 10 | BICF2S23440926          | 20760367 | A | 0    | 0      | G |
| 10 | BICF2G630476757         | 20769085 | A | 0    | 0      | G |
| 10 | BICF2G630476786         | 20785314 | A | 1    | 1      | G |
| 10 | BICF2S23539950          | 20809193 | A | 1    | 1      | G |
| 10 | BICF2P1189167           | 20815061 | 0 | 0    | 0      | C |
| 10 | BICF2P1186475           | 20835533 | 0 | 0    | 0      | G |
| 10 | BICF2S23646761          | 20856615 | G | 0    | 0      | A |
| 10 | BICF2P145315            | 20862472 | 0 | 0    | 0      | G |
| 10 | BICF2S23552428          | 20879998 | A | 0    | 0      | G |
| 10 | BICF2P215163            | 20900857 | 0 | 0    | 0      | C |
| 10 | BICF2S23535897          | 20907566 | A | 0    | 0      | G |
| 10 | BICF2S23711700          | 20924642 | 0 | 0    | 0      | G |
| 10 | BICF2S23248178          | 20938553 | A | 0    | 0      | G |
| 10 | BICF2S23653707          | 20953528 | G | 0    | 0      | A |
| 10 | BICF2G630476819         | 20969912 | G | 0    | 0      | A |
| 10 | BICF2G630476847         | 20977836 | A | 0    | 0      | G |
| 10 | BICF2S23763624          | 21003653 | G | 0.25 | 0.2143 | A |
| 10 | BICF2G630476863         | 21015546 | A | 0    | 0.1    | C |
| 10 | BICF2G630476883         | 21032209 | A | 0    | 0      | G |
| 10 | BICF2G630476894         | 21038174 | A | 0    | 0      | G |
| 10 | BICF2S23057546          | 21048848 | A | 0.5  | 0.4167 | G |
| 10 | BICF2G630476924         | 21054725 | C | 0    | 0      | A |
| 10 | BICF2G630476932         | 21059241 | A | 0.5  | 0.4286 | C |
| 10 | BICF2S22931870          | 21063615 | G | 0    | 0      | A |
| 10 | BICF2S22914679          | 21074310 | A | 0    | 0      | G |
| 10 | BICF2P212964            | 21088011 | G | 0.5  | 0.5714 | A |
| 10 | BICF2S2398845           | 21101134 | A | 0    | 0      | G |
| 10 | BICF2P397711            | 21120656 | C | 0    | 0      | G |
| 10 | BICF2G630477021         | 21135938 | A | 0    | 0      | C |
| 10 | TIGRP2P138832_rs8665665 | 21139835 | 0 | 0    | 0      | A |
| 10 | BICF2P949774            | 21149675 | 0 | 0    | 0      | C |
| 10 | BICF2S22963358          | 21168069 | A | 0.5  | 0.5714 | G |
| 10 | BICF2G630477022         | 21182592 | A | 0.25 | 0.2143 | G |
| 10 | BICF2S23548656          | 21186445 | A | 0.25 | 0.2143 | G |
| 10 | TIGRP2P138833_rs9196182 | 21199037 | 0 | 0    | 0      | C |
| 10 | BICF2G630477032         | 21208404 | A | 0.75 | 0.7857 | G |
| 10 | BICF2G630477053         | 21224211 | G | 0.75 | 0.7857 | A |
| 10 | BICF2G630477070         | 21230860 | G | 0.5  | 0.5714 | A |
| 10 | BICF2G630477074         | 21250016 | G | 0    | 0      | A |
| 10 | BICF2G630477080         | 21258702 | G | 0    | 0      | C |
| 10 | BICF2G630477108         | 21274843 | G | 0.75 | 0.7857 | A |
| 10 | BICF2P379354            | 21277028 | G | 0.75 | 0.7857 | A |

|    |                         |          |   |      |        |   |
|----|-------------------------|----------|---|------|--------|---|
| 10 | BICF2G630477117         | 21288528 | A | 0.75 | 0.7857 | G |
| 10 | BICF2G630477121         | 21301586 | A | 0.5  | 0.4286 | C |
| 10 | TIGRP2P138835_rs8967021 | 21314541 | 0 | 0    | 0      | G |
| 10 | BICF2G630477137         | 21327079 | A | 0    | 0.1667 | C |
| 10 | BICF2G630477156         | 21333717 | A | 0.75 | 0.7857 | G |
| 10 | BICF2G630477187         | 21345466 | C | 0.25 | 0.2143 | A |
| 10 | BICF2G630477216         | 21356215 | G | 0.75 | 0.7857 | A |
| 10 | BICF2P770135            | 21367723 | A | 0.25 | 0.2143 | G |
| 10 | BICF2G630477234         | 21388067 | A | 1    | 1      | G |
| 10 | BICF2G630477242         | 21392104 | A | 0    | 0      | C |
| 10 | BICF2G630477266         | 21399975 | A | 0    | 0      | G |
| 10 | BICF2G630477274         | 21401730 | C | 0.25 | 0.2143 | A |
| 10 | BICF2G630477307         | 21414509 | 0 | 0    | 0      | C |
| 10 | BICF2S23747195          | 21437588 | A | 0    | 0      | G |
| 10 | BICF2P72900             | 21466901 | A | 0.25 | 0.2143 | G |
| 10 | BICF2S22946687          | 21472308 | A | 0    | 0      | G |
| 10 | BICF2S2324854           | 21490775 | A | 0    | 0      | G |
| 10 | BICF2P803082            | 21498876 | A | 0.25 | 0.2143 | G |
| 10 | TIGRP2P138837_rs8681520 | 21514450 | 0 | 0    | 0      | C |
| 10 | TIGRP2P138839_rs9088156 | 21534921 | 0 | 0    | 0      | C |
| 10 | BICF2G630477316         | 21541594 | G | 0.75 | 0.7857 | A |
| 10 | BICF2G630477319         | 21582032 | A | 0    | 0      | G |
| 10 | BICF2S23251757          | 21595461 | A | 0    | 0      | C |
| 10 | BICF2G630477321         | 21606691 | A | 0.25 | 0.2143 | G |
| 10 | BICF2G630477322         | 21609208 | A | 0    | 0      | G |
| 10 | BICF2P858340            | 21622170 | 0 | 0    | 0      | G |
| 10 | BICF2P1290657           | 21634100 | 0 | 0    | 0      | A |
| 10 | BICF2P1434136           | 21645722 | A | 0    | 0      | G |
| 10 | BICF2S23347379          | 21662278 | A | 0    | 0      | G |
| 10 | BICF2S23229875          | 21668563 | A | 0    | 0      | G |
| 10 | BICF2P1204435           | 21680347 | 0 | 0    | 0      | A |
| 10 | BICF2S23620835          | 21689634 | G | 0.75 | 0.7857 | A |
| 10 | BICF2S23551774          | 21707591 | A | 0    | 0      | G |
| 10 | BICF2S22949031          | 21712139 | G | 0    | 0      | A |
| 10 | BICF2S2366144           | 21723906 | A | 0    | 0      | G |
| 10 | G588f45S168             | 21755499 | 0 | 0    | 0      | C |
| 10 | BICF2S2417932           | 21760238 | A | 1    | 1      | G |
| 10 | TIGRP2P138843_rs9089525 | 21792224 | 0 | 0    | 0      | C |
| 10 | BICF2P1138892           | 21799255 | A | 0    | 0      | G |
| 10 | BICF2G630477325         | 21835914 | A | 0.25 | 0.2143 | G |
| 10 | BICF2G630477326         | 21852307 | A | 0    | 0      | G |
| 10 | BICF2P1035132           | 21865018 | 0 | 0    | 0      | G |
| 10 | BICF2S23252280          | 21882118 | G | 0.5  | 0.4286 | A |
| 10 | BICF2P1113285           | 21891186 | 0 | 0    | 0      | G |
| 10 | BICF2P1083878           | 21899705 | G | 0    | 0      | A |
| 10 | BICF2P1093156           | 21908933 | 0 | 0    | 0      | G |
| 10 | BICF2P1330629           | 21924129 | 0 | 0    | 0      | G |

|    |                 |          |   |      |        |   |
|----|-----------------|----------|---|------|--------|---|
| 10 | BICF2G630477338 | 21935313 | A | 0.25 | 0.2143 | G |
| 10 | BICF2G630477358 | 21946554 | A | 0.25 | 0.2143 | G |
| 10 | BICF2G630477394 | 21956429 | G | 0.25 | 0.2143 | C |
| 10 | BICF2G630477421 | 21964082 | G | 0.5  | 0.4286 | A |
| 10 | BICF2P826827    | 21975190 | 0 | 0    | 0      | G |
| 10 | BICF2G630477444 | 21975242 | A | 0.25 | 0.2143 | G |
| 10 | BICF2P948947    | 21980085 | A | 0.25 | 0.2143 | G |
| 10 | BICF2P1207446   | 21992574 | G | 0.25 | 0.2143 | A |
| 10 | BICF2G630477457 | 22008650 | C | 0.5  | 0.4286 | A |
| 10 | BICF2G630477461 | 22012123 | G | 0.5  | 0.4286 | A |
| 10 | BICF2G630477504 | 22027741 | G | 0.25 | 0.2143 | A |
| 10 | BICF2G630477520 | 22035692 | G | 0    | 0      | A |
| 10 | BICF2G630477564 | 22055807 | G | 0.25 | 0.1667 | A |
| 10 | BICF2G630477571 | 22057419 | A | 0.25 | 0.2143 | G |
| 10 | BICF2S23627211  | 22082398 | G | 0    | 0      | A |
| 10 | BICF2G630477576 | 22094309 | C | 0    | 0      | A |
| 10 | BICF2S23731451  | 22108980 | A | 0    | 0      | G |
| 10 | BICF2P488106    | 22122019 | C | 0.75 | 0.7857 | A |
| 10 | BICF2G630477592 | 22135454 | G | 0.5  | 0.4286 | A |
| 10 | BICF2P985162    | 22217941 | A | 0.5  | 0.4286 | G |
| 10 | BICF2P203260    | 22218825 | G | 0.5  | 0.4286 | A |
| 10 | BICF2G630477616 | 22230481 | A | 0    | 0      | G |
| 10 | BICF2G630477627 | 22247102 | A | 0.5  | 0.4286 | G |
| 10 | BICF2P1171767   | 22257558 | G | 0.5  | 0.4286 | A |
| 10 | BICF2G630477655 | 22266843 | A | 0.25 | 0.2143 | G |
| 10 | BICF2G630477665 | 22277669 | A | 0.5  | 0.4286 | G |
| 10 | BICF2G630477687 | 22295036 | G | 0.5  | 0.4286 | A |
| 10 | BICF2P864547    | 22303498 | A | 0.5  | 0.4286 | G |
| 10 | BICF2G630477709 | 22311210 | G | 0.5  | 0.4286 | A |
| 10 | BICF2G630477729 | 22321916 | A | 0.5  | 0.4286 | G |
| 10 | BICF2G630477747 | 22341555 | A | 0.5  | 0.4286 | G |
| 10 | BICF2G630477755 | 22345647 | A | 0.5  | 0.4286 | G |
| 10 | BICF2G630477771 | 22357421 | G | 0.5  | 0.4286 | A |
| 10 | BICF2G630477785 | 22373594 | C | 0.5  | 0.4286 | A |
| 10 | BICF2G630477791 | 22385267 | A | 0.5  | 0.4286 | G |
| 10 | BICF2G630477799 | 22412123 | A | 0.5  | 0.4286 | T |
| 10 | BICF2G630477805 | 22423701 | G | 0.5  | 0.4286 | A |
| 10 | BICF2G630477816 | 22431549 | A | 0.5  | 0.4286 | G |
| 10 | BICF2G630477848 | 22441887 | A | 0.5  | 0.4286 | G |
| 10 | BICF2P1501613   | 22457894 | A | 0.5  | 0.4286 | G |
| 10 | BICF2G630477888 | 22469396 | C | 0.5  | 0.4286 | A |
| 10 | BICF2G630477916 | 22478140 | A | 0.5  | 0.4286 | G |
| 10 | BICF2G630477918 | 22478756 | G | 0.5  | 0.4286 | A |
| 10 | BICF2S23051244  | 22484452 | A | 0.5  | 0.4286 | G |
| 10 | BICF2G630477949 | 22496690 | A | 0.5  | 0.4286 | G |
| 10 | BICF2S23440743  | 22512341 | A | 0.5  | 0.4286 | G |
| 10 | BICF2P234188    | 22517579 | A | 0.5  | 0.4286 | C |

|    |                         |          |   |      |        |   |
|----|-------------------------|----------|---|------|--------|---|
| 10 | BICF2G630477974         | 22530300 | A | 0.5  | 0.4286 | G |
| 10 | BICF2G630477988         | 22540539 | A | 0.5  | 0.4286 | G |
| 10 | BICF2G630477998         | 22553244 | G | 0.5  | 0.4286 | A |
| 10 | BICF2P1457618           | 22569225 | 0 | 0    | 0      | A |
| 10 | BICF2G630478017         | 22583034 | G | 0.5  | 0.4286 | A |
| 10 | BICF2G630478037         | 22599889 | G | 0.5  | 0.4286 | C |
| 10 | BICF2G630478046         | 22603202 | A | 0.5  | 0.4286 | G |
| 10 | BICF2P391908            | 22609480 | G | 0.5  | 0.4286 | A |
| 10 | BICF2G630478052         | 22625838 | A | 0.5  | 0.4286 | G |
| 10 | BICF2S23656207          | 22639172 | G | 1    | 1      | A |
| 10 | BICF2G630478117         | 22645059 | A | 1    | 1      | G |
| 10 | BICF2G630478126         | 22662728 | G | 1    | 1      | A |
| 10 | TIGRP2P138853_rs8954626 | 22668351 | 0 | 0    | 0      | C |
| 10 | BICF2G630478142         | 22682034 | G | 1    | 1      | A |
| 10 | BICF2G630478145         | 22689195 | G | 1    | 1      | A |
| 10 | BICF2P1421647           | 22690682 | A | 1    | 1      | G |
| 10 | BICF2G630478157         | 22706146 | G | 0.75 | 0.7857 | A |
| 10 | BICF2G630478160         | 22717729 | G | 0.75 | 0.7857 | A |
| 10 | BICF2G630478167         | 22729079 | G | 0.75 | 0.7857 | A |
| 10 | BICF2P665689            | 22754002 | A | 0    | 0      | G |
| 10 | BICF2S23912298          | 22764074 | A | 0    | 0      | G |
| 10 | BICF2P469421            | 22778943 | A | 0    | 0      | G |
| 10 | BICF2G630478171         | 22782488 | A | 0    | 0      | G |
| 10 | BICF2G630478172         | 22804156 | G | 1    | 1      | A |
| 10 | BICF2G630478197         | 22809184 | A | 0.5  | 0.5833 | C |
| 10 | BICF2S22955508          | 22813536 | G | 1    | 1      | A |
| 10 | BICF2P1268219           | 22821451 | A | 0    | 0      | C |
| 10 | BICF2S22921836          | 22835461 | C | 0    | 0      | A |
| 10 | BICF2G630478219         | 22853806 | 0 | 0    | 0      | G |
| 10 | BICF2G630478225         | 22863274 | A | 0    | 0      | G |
| 10 | BICF2G630478261         | 22875760 | A | 0.25 | 0.2143 | G |
| 10 | BICF2S23627912          | 22885243 | A | 0    | 0      | C |
| 10 | BICF2G630478301         | 22899045 | G | 0.25 | 0.2143 | A |
| 10 | BICF2G630478327         | 22915081 | A | 0.25 | 0.2143 | G |
| 10 | BICF2G630478352         | 22920571 | A | 0.25 | 0.2143 | G |
| 10 | BICF2G630478365         | 22940260 | 0 | 0    | 0      | G |
| 10 | BICF2G630478366         | 22962566 | A | 0    | 0      | C |
| 10 | BICF2G630478368         | 22975403 | G | 0    | 0      | A |
| 10 | BICF2S23312766          | 22986131 | G | 0.75 | 0.7857 | A |
| 10 | TIGRP2P138855_rs8781050 | 22996271 | 0 | 0    | 0      | A |
| 10 | BICF2P1297054           | 23002173 | A | 0    | 0      | G |
| 10 | BICF2G630478371         | 23017473 | A | 0    | 0      | G |
| 10 | BICF2G630478374         | 23031325 | G | 0    | 0      | A |
| 10 | BICF2G630478398         | 23036389 | G | 0    | 0      | A |
| 10 | BICF2G630478414         | 23055530 | G | 0.25 | 0.2143 | A |
| 10 | BICF2G630478418         | 23060041 | G | 0.25 | 0.2143 | A |
| 10 | BICF2P235837            | 23083559 | A | 0    | 0      | G |

|    |                         |          |   |      |        |   |
|----|-------------------------|----------|---|------|--------|---|
| 10 | BICF2S2309770           | 23097706 | A | 0    | 0      | G |
| 10 | BICF2P417548            | 23110264 | 0 | 0    | 0      | C |
| 10 | TIGRP2P138857_rs8560213 | 23122673 | 0 | 0    | 0      | G |
| 10 | BICF2P681558            | 23134200 | 0 | 0    | 0      | G |
| 10 | BICF2S2297011           | 23147314 | A | 0.25 | 0.1667 | G |
| 10 | BICF2S23660477          | 23149171 | A | 0.75 | 0.7857 | G |
| 10 | BICF2S22922710          | 23151631 | A | 0.25 | 0.2143 | G |
| 10 | BICF2S22961798          | 23165150 | A | 0.25 | 0.2143 | G |
| 10 | BICF2S23418007          | 23174965 | G | 0.75 | 0.7857 | A |
| 10 | BICF2S23039142          | 23191906 | A | 0.75 | 0.7857 | T |
| 10 | TIGRP2P138884_rs9238972 | 23218570 | 0 | 0    | 0      | C |
| 10 | BICF2S23254840          | 23238155 | A | 0.5  | 0.5714 | G |
| 10 | BICF2P1254506           | 23252830 | 0 | NA   | 0      | A |
| 10 | BICF2S22961647          | 23254590 | A | 0    | 0      | G |
| 10 | BICF2P1266921           | 23274862 | 0 | 0    | 0      | C |
| 10 | BICF2S23443816          | 23276597 | A | 0    | 0      | G |
| 10 | BICF2S23225723          | 23296810 | A | 0    | 0      | G |
| 10 | BICF2S2321625           | 23301594 | A | 0    | 0      | G |
| 10 | TIGRP2P138885_rs8811851 | 23313995 | 0 | 0    | 0      | C |
| 10 | BICF2S23763011          | 23329591 | A | 0.75 | 0.7857 | G |
| 10 | BICF2P520027            | 23337289 | 0 | 0    | 0      | C |
| 10 | BICF2S22958360          | 23368805 | A | 0    | 0      | G |
| 10 | BICF2S22912122          | 23395551 | A | 0    | 0      | G |
| 10 | BICF2S23354597          | 23403871 | A | 0    | 0      | G |
| 10 | BICF2P843320            | 23421506 | 0 | 0    | 0      | A |
| 10 | BICF2S23754811          | 23436418 | G | 0.75 | 0.7857 | A |
| 10 | BICF2P1349718           | 23475067 | 0 | 0    | 0      | C |
| 10 | BICF2P1299326           | 23516595 | A | 0    | 0      | T |
| 10 | BICF2G630478423         | 23519257 | A | 0.25 | 0.2143 | G |
| 10 | BICF2S2375146           | 23530983 | G | 0.75 | 0.7857 | A |
| 10 | BICF2G630478460         | 23542730 | A | 0    | 0      | G |
| 10 | BICF2G630478479         | 23569729 | G | 0.25 | 0.2143 | A |
| 10 | BICF2G630478497         | 23577755 | A | 0    | 0      | G |
| 10 | BICF2G630478507         | 23586597 | A | 0    | 0      | G |
| 10 | BICF2G630478534         | 23604396 | A | 0.25 | 0.2143 | G |
| 10 | BICF2G630478542         | 23619067 | A | 0.25 | 0.2143 | G |
| 10 | BICF2G630478549         | 23628582 | A | 0.5  | 0.5714 | C |
| 10 | BICF2G630478568         | 23638368 | G | 0.25 | 0.2143 | A |
| 10 | BICF2G630478575         | 23644730 | G | 0    | 0      | A |
| 10 | BICF2G630478620         | 23662622 | C | 0    | 0      | A |
| 10 | BICF2G630478624         | 23666778 | C | 0    | 0      | A |
| 10 | BICF2G630478635         | 23673487 | A | 0    | 0      | G |
| 10 | BICF2G630478646         | 23684117 | A | 0.75 | 0.7857 | C |
| 10 | BICF2P970656            | 23700037 | 0 | 0    | 0      | A |
| 10 | BICF2P371631            | 23717704 | 0 | 0    | 0      | C |
| 10 | BICF2G630478662         | 23733491 | G | 0    | 0      | A |
| 10 | BICF2G630478665         | 23750626 | G | 0.25 | 0.2143 | A |

|    |                 |          |   |      |        |   |
|----|-----------------|----------|---|------|--------|---|
| 10 | BICF2G630478667 | 23768657 | G | 0.25 | 0.2143 | A |
| 10 | BICF2G630478669 | 23772829 | G | 0.25 | 0.2143 | A |
| 10 | BICF2G630478675 | 23785661 | A | 0.25 | 0.2143 | G |
| 10 | BICF2G630478678 | 23802783 | 0 | 0    | 0      | G |
| 10 | BICF2G630478691 | 23813676 | A | 0    | 0      | G |
| 10 | BICF2G630478726 | 23819454 | 0 | 0    | 0      | C |
| 10 | BICF2P99091     | 23838094 | 0 | 0    | 0      | G |
| 10 | BICF2G630478746 | 23848926 | G | 0    | 0      | A |
| 10 | BICF2G630478760 | 23861679 | G | 0    | 0      | A |
| 10 | BICF2G630478761 | 23862706 | T | 0    | 0      | A |
| 10 | BICF2G630478775 | 23883228 | 0 | 0    | 0      | A |
| 10 | BICF2P300290    | 23885989 | A | 0.5  | 0.5714 | G |
| 10 | BICF2S23412813  | 23906828 | C | 0.75 | 0.7857 | A |
| 10 | BICF2S23324988  | 23909334 | C | 0.5  | 0.5714 | A |
| 10 | BICF2P500453    | 23928809 | 0 | 0    | 0      | G |
| 10 | BICF2G630478794 | 23933962 | 0 | 0    | 0      | C |
| 10 | BICF2G630478797 | 23943275 | G | 0.5  | 0.5714 | A |
| 10 | BICF2P762174    | 23945382 | A | 0.5  | 0.5714 | T |
| 10 | BICF2P1120337   | 23951327 | A | 0.25 | 0.2143 | G |
| 10 | BICF2G630478807 | 23955054 | A | 0.25 | 0.2143 | G |
| 10 | BICF2G630478814 | 23967571 | G | 0    | 0      | A |
| 10 | BICF2G630478824 | 23969439 | A | 0.25 | 0.2143 | G |
| 10 | BICF2P999052    | 23981154 | 0 | 0    | 0      | A |
| 10 | BICF2G630478866 | 23994370 | A | 0    | 0      | G |
| 10 | BICF2P720284    | 24010374 | 0 | 0    | 0      | A |
| 10 | BICF2S23731603  | 24018745 | A | 0    | 0      | G |
| 10 | BICF2P224668    | 24030903 | T | 0.5  | 0.5714 | A |
| 10 | BICF2G630478870 | 24035894 | G | 0.5  | 0.5714 | A |
| 10 | BICF2S23355356  | 24048734 | G | 0.25 | 0.2143 | A |
| 10 | BICF2P568651    | 24062877 | A | 0    | 0      | G |
| 10 | BICF2G630478886 | 24076577 | G | 0.75 | 0.7857 | A |
| 10 | BICF2G630478893 | 24081845 | A | 0.75 | 0.7857 | G |
| 10 | BICF2S23217631  | 24092628 | A | 0    | 0      | G |
| 10 | BICF2G630478914 | 24106972 | G | 0.5  | 0.4286 | A |
| 10 | BICF2G630478924 | 24118823 | G | 0.25 | 0.1667 | A |
| 10 | BICF2P390535    | 24127290 | A | 0.5  | 0.2143 | G |
| 10 | BICF2P573979    | 24145612 | A | 0.25 | 0.2143 | G |
| 10 | BICF2P801304    | 24159608 | C | 0.25 | 0.2143 | A |
| 10 | BICF2S23632430  | 24165797 | G | 0.5  | 0.5714 | A |
| 10 | BICF2P277444    | 24175614 | A | 0.25 | 0.2143 | G |
| 10 | BICF2G630478959 | 24186541 | A | 0.5  | 0.5714 | G |
| 10 | BICF2G630478966 | 24197264 | G | 0    | 0      | A |
| 10 | BICF2P155864    | 24207867 | A | 1    | 1      | C |
| 10 | BICF2G630478981 | 24230443 | G | 0.75 | 0.7857 | A |
| 10 | BICF2G630478986 | 24235029 | A | 0.5  | 0.5714 | G |
| 10 | BICF2G630479000 | 24252341 | A | 0.25 | 0.2143 | G |
| 10 | BICF2P675624    | 24263476 | 0 | 0    | 0      | A |

|    |                         |          |   |      |        |   |
|----|-------------------------|----------|---|------|--------|---|
| 10 | BICF2P1363701           | 24265623 | A | 0.25 | 0.2143 | C |
| 10 | BICF2G630479010         | 24282070 | A | 0.25 | 0.2143 | G |
| 10 | BICF2G630479036         | 24297917 | G | 1    | 1      | A |
| 10 | BICF2G630479054         | 24310750 | A | 0.75 | 0.7857 | G |
| 10 | BICF2G630479089         | 24318035 | A | 0.25 | 0.2143 | G |
| 10 | BICF2G630479099         | 24322630 | A | 0.25 | 0.2143 | G |
| 10 | BICF2G630479139         | 24341512 | C | 1    | 1      | A |
| 10 | BICF2G630479147         | 24348989 | A | 0    | 0      | C |
| 10 | BICF2G630479159         | 24383697 | A | 0    | 0      | C |
| 10 | BICF2G630479194         | 24413575 | A | 0.75 | 0.8333 | C |
| 10 | BICF2G630479195         | 24414977 | G | 1    | 1      | C |
| 10 | BICF2S23145758          | 24430781 | G | 0    | 0      | A |
| 10 | BICF2G630479205         | 24443590 | G | 0    | 0      | A |
| 10 | BICF2P1097418           | 24456246 | A | 0.75 | 0.7857 | G |
| 10 | BICF2G630479220         | 24462125 | A | 0    | 0      | G |
| 10 | BICF2G630479260         | 24476882 | A | 0.75 | 0.7857 | G |
| 10 | BICF2S23614659          | 24490444 | 0 | 0    | 0      | G |
| 10 | BICF2G630479266         | 24495249 | G | 0.25 | 0.2143 | A |
| 10 | BICF2G630479272         | 24511245 | A | 0    | 0      | G |
| 10 | BICF2G630479294         | 24526332 | A | 0    | 0      | G |
| 10 | BICF2P644899            | 24530545 | G | 0.25 | 0.2143 | A |
| 10 | BICF2G630479321         | 24542865 | A | 0.25 | 0.2143 | G |
| 10 | BICF2G630479352         | 24556493 | A | 0.25 | 0.2143 | G |
| 10 | BICF2G630479376         | 24565784 | A | 0.25 | 0.2143 | C |
| 10 | BICF2G630479409         | 24580963 | A | 0.25 | 0.2143 | G |
| 10 | BICF2G630479422         | 24591132 | G | 0.25 | 0.2143 | A |
| 10 | BICF2G630479452         | 24607900 | C | 0    | 0      | A |
| 10 | BICF2G630479466         | 24614208 | G | 0.25 | 0.2143 | A |
| 10 | TIGRP2P138899_rs8919447 | 24630568 | 0 | 0    | 0      | C |
| 10 | BICF2G630479468         | 24643919 | A | 0    | 0      | G |
| 10 | BICF2G630479469         | 24664738 | A | 0    | 0      | G |
| 10 | BICF2P1405852           | 24670857 | 0 | 0    | 0      | C |
| 10 | BICF2S23023369          | 24684607 | 0 | 0    | 0      | G |
| 10 | BICF2P701195            | 24701967 | A | 0    | 0      | G |
| 10 | TIGRP2P138901_rs8855903 | 24708228 | 0 | 0    | 0      | C |
| 10 | BICF2P724328            | 24731582 | A | 0    | 0      | G |
| 10 | BICF2P449997            | 24737343 | G | 1    | 1      | A |
| 10 | BICF2P423374            | 24745907 | A | 0    | 0      | G |
| 10 | BICF2P505563            | 24750145 | A | 0    | 0      | G |
| 10 | BICF2P1238038           | 24759819 | A | 0.25 | 0.2143 | G |
| 10 | BICF2P658421            | 24780598 | A | 0    | 0      | G |
| 10 | BICF2S23614505          | 24784231 | C | 0    | 0      | A |
| 10 | TIGRP2P138902_rs8756618 | 24803017 | 0 | 0    | 0      | G |
| 10 | BICF2S23417685          | 24811844 | A | 0    | 0      | C |
| 10 | BICF2P187940            | 24819649 | G | 0    | 0      | A |
| 10 | BICF2P498253            | 24859477 | A | 0    | 0      | G |
| 10 | BICF2P935185            | 24864948 | A | 0    | 0      | G |

|    |                |          |   |      |        |   |
|----|----------------|----------|---|------|--------|---|
| 10 | BICF2P845591   | 24882859 | A | 0.25 | 0.2143 | G |
| 10 | BICF2P860441   | 24886154 | A | 0    | 0      | G |
| 10 | BICF2P266140   | 24901701 | C | 0    | 0      | G |
| 10 | BICF2P1000590  | 24916401 | A | 0.25 | 0.2143 | G |
| 10 | BICF2S2441307  | 24948056 | A | 0.25 | 0.2143 | T |
| 10 | BICF2S23225309 | 24982440 | A | 0.25 | 0.2143 | G |
| 10 | BICF2S23541070 | 25001305 | G | 0.25 | 0.2143 | A |
| 10 | BICF2S23240926 | 25015047 | A | 1    | 1      | G |
| 10 | BICF2S23620136 | 25024181 | A | 0.75 | 0.7857 | C |
| 10 | BICF2P293757   | 25044348 | 0 | 0    | 0      | C |
| 10 | BICF2P120597   | 25053733 | 0 | 0    | 0      | A |
| 10 | BICF2P1122245  | 25058906 | 0 | 0    | 0      | A |
| 10 | BICF2P794060   | 25072419 | G | 1    | 1      | A |
| 10 | BICF2P293118   | 25086591 | A | 0    | 0      | T |
| 10 | BICF2S2291091  | 25102339 | G | 0.25 | 0.2143 | A |
| 10 | BICF2P1405561  | 25111013 | 0 | 0    | 0      | A |
| 10 | BICF2P1103002  | 25117596 | G | 0.25 | 0.2143 | A |
| 10 | BICF2P255600   | 25128691 | G | 0.25 | 0.2143 | A |
| 10 | BICF2P7902     | 25142880 | A | 0.25 | 0.2143 | G |
| 10 | BICF2P28615    | 25161525 | A | 0.25 | 0.2143 | G |
| 10 | BICF2P621546   | 25163665 | G | 0.25 | 0.2143 | A |
| 10 | BICF2P1195488  | 25178947 | G | 0    | 0      | A |
| 10 | BICF2P633946   | 25192688 | A | 0    | 0      | G |
| 10 | BICF2P1343887  | 25203052 | 0 | 0    | 0      | C |
| 10 | BICF2P395862   | 25210626 | A | 0    | 0      | G |
| 10 | BICF2P686473   | 25221307 | G | 0    | 0      | A |
| 10 | BICF2P38160    | 25233363 | 0 | 0    | 0      | C |
| 10 | BICF2P1379452  | 25260851 | 0 | 0    | 0      | G |
| 10 | BICF2S23047093 | 25268125 | 0 | 0    | 0      | T |
| 10 | BICF2P626698   | 25286050 | A | 0    | 0      | G |
| 10 | BICF2P96245    | 25292525 | 0 | 0    | 0      | G |
| 10 | BICF2P326837   | 25303662 | G | 0.75 | 0.7857 | A |
| 10 | BICF2P921727   | 25339740 | A | 0    | 0      | G |
| 10 | BICF2P921796   | 25346215 | A | 1    | 1      | G |
| 10 | BICF2P1150585  | 25359914 | G | 0    | 0      | A |
| 10 | BICF2P1369320  | 25369165 | G | 1    | 1      | A |
| 10 | BICF2S22942696 | 25382756 | C | 0.25 | 0.2143 | A |
| 10 | BICF2S23731219 | 25413986 | 0 | 0    | 0      | G |
| 10 | BICF2P34890    | 25416202 | A | 0    | 0      | G |
| 10 | BICF2S23141456 | 25437245 | C | 0.25 | 0.2143 | G |
| 10 | BICF2S22922635 | 25440578 | A | 0.25 | 0.2143 | G |
| 10 | BICF2S24416376 | 25449712 | A | 0.75 | 0.8333 | G |
| 10 | BICF2P578928   | 25464137 | A | 0    | 0      | G |
| 10 | BICF2P680237   | 25473368 | G | 0.25 | 0.2143 | A |
| 10 | BICF2P500368   | 25486667 | G | 0    | 0      | A |
| 10 | BICF2S22920265 | 25496024 | G | 0.25 | 0.2143 | A |
| 10 | BICF2P467953   | 25511288 | 0 | 0    | 0      | G |



|    |                         |          |   |      |        |   |
|----|-------------------------|----------|---|------|--------|---|
| 10 | BICF2P107435            | 25523549 | 0 | 0    | 0      | T |
| 10 | BICF2P97539             | 25540933 | A | 0    | 0      | G |
| 10 | BICF2P225222            | 25543712 | 0 | 0    | 0      | C |
| 10 | BICF2P858747            | 25556556 | A | 0.25 | 0.2143 | G |
| 10 | BICF2P253015            | 25574436 | A | 0    | 0      | G |
| 10 | BICF2P1191743           | 25587259 | 0 | 0    | 0      | G |
| 10 | BICF2P611768            | 25612161 | 0 | 0    | 0      | G |
| 10 | BICF2P549512            | 25635053 | G | 0.75 | 0.7857 | A |
| 10 | BICF2S23741999          | 25649991 | 0 | 0    | 0      | A |
| 10 | BICF2P1383491           | 25657039 | C | 0    | 0      | G |
| 10 | BICF2P1383492           | 25657545 | G | 0.75 | 0.7857 | C |
| 10 | BICF2P418144            | 25663694 | A | 0.75 | 0.7857 | G |
| 10 | BICF2P1221052           | 25673093 | A | 0    | 0      | C |
| 10 | BICF2S2411339           | 25687611 | A | 0    | 0      | G |
| 10 | BICF2P106912            | 25691673 | G | 0    | 0      | A |
| 10 | BICF2P722107            | 25703920 | A | 0.75 | 0.7857 | G |
| 10 | BICF2S23760981          | 25722314 | A | 0    | 0.2143 | G |
| 10 | BICF2P1392199           | 25730052 | C | 0    | 0      | A |
| 10 | BICF2P1096676           | 25745303 | A | 0.25 | 0.2143 | G |
| 10 | BICF2P1446201           | 25752826 | G | 0    | 0      | A |
| 10 | BICF2P1406081           | 25767830 | A | 0.75 | 0.7857 | G |
| 10 | BICF2P1406080           | 25767881 | G | 0.75 | 0.7857 | A |
| 10 | BICF2P591               | 25774163 | C | 1    | 1      | A |
| 10 | BICF2S23134002          | 25792024 | A | 1    | 1      | C |
| 10 | TIGRP2P138927_rs9178835 | 25804310 | 0 | 0    | 0      | A |
| 10 | BICF2P365292            | 25817157 | 0 | 0    | 0      | C |
| 10 | BICF2P716505            | 25820311 | G | 0    | 0      | A |
| 10 | BICF2P373368            | 25838030 | A | 0.25 | 0.2143 | G |
| 10 | BICF2P384880            | 25843638 | A | 0    | 0      | G |
| 10 | BICF2P1110640           | 25853208 | A | 0    | 0      | G |
| 10 | BICF2P1329068           | 25870135 | A | 0    | 0      | G |
| 10 | BICF2P1405476           | 25877921 | A | 0    | 0      | G |
| 10 | BICF2P710967            | 25895601 | G | 0    | 0      | A |
| 10 | BICF2P143905            | 25902790 | A | 0    | 0      | G |
| 10 | BICF2P436474            | 25915896 | 0 | 0    | 0      | G |
| 10 | BICF2S23049369          | 25929812 | 0 | 0    | 0      | A |
| 10 | BICF2P302853            | 25936817 | 0 | 0    | 0      | G |
| 10 | BICF2S23453542          | 25952701 | G | 0    | 0      | A |
| 10 | BICF2P458474            | 25957370 | A | 0    | 0      | G |
| 10 | BICF2S23341051          | 25969044 | A | 0    | 0      | G |
| 10 | BICF2P915238            | 26006066 | A | 0    | 0      | G |
| 10 | BICF2P451067            | 26022690 | G | 0    | 0      | A |
| 10 | BICF2P1421854           | 26034926 | A | 0    | 0      | G |
| 10 | BICF2P1068149           | 26043959 | A | 0    | 0      | C |
| 10 | BICF2P273115            | 26063353 | G | 0    | 0      | A |
| 10 | BICF2P1153978           | 26076455 | G | 0    | 0      | A |
| 10 | BICF2P937538            | 26097105 | A | 0    | 0      | G |

|    |                         |          |   |   |   |   |
|----|-------------------------|----------|---|---|---|---|
| 10 | BICF2S2338701           | 26109233 | A | 0 | 0 | G |
| 10 | BICF2P993573            | 26119086 | 0 | 0 | 0 | G |
| 10 | BICF2S23254187          | 26139321 | A | 0 | 0 | G |
| 10 | BICF2S2352701           | 26159399 | A | 1 | 1 | G |
| 10 | BICF2S23620859          | 26172348 | A | 1 | 1 | G |
| 10 | BICF2S23316193          | 26177251 | C | 1 | 1 | G |
| 10 | BICF2S23419855          | 26185551 | G | 1 | 1 | C |
| 10 | BICF2P373029            | 26216419 | 0 | 0 | 0 | A |
| 10 | BICF2P614390            | 26234731 | 0 | 0 | 0 | A |
| 10 | BICF2S24413320          | 26255452 | A | 0 | 0 | G |
| 10 | BICF2S23553130          | 26267162 | A | 0 | 0 | G |
| 10 | BICF2P514912            | 26283193 | 0 | 0 | 0 | G |
| 10 | BICF2S237390            | 26305822 | G | 1 | 1 | A |
| 10 | BICF2S23416847          | 26369162 | C | 1 | 1 | A |
| 10 | BICF2S23348046          | 26376714 | C | 0 | 0 | G |
| 10 | BICF2S23549137          | 26418638 | 0 | 0 | 0 | C |
| 10 | BICF2P526856            | 26435525 | 0 | 0 | 0 | C |
| 10 | BICF2S23612887          | 26440690 | A | 0 | 0 | G |
| 10 | BICF2S23548114          | 26465365 | A | 0 | 0 | G |
| 10 | BICF2G630479488         | 26474395 | A | 0 | 0 | G |
| 10 | BICF2S24116484          | 26489495 | C | 0 | 0 | A |
| 10 | BICF2P740631            | 26496871 | A | 0 | 0 | C |
| 10 | BICF2G630479505         | 26515070 | G | 0 | 0 | A |
| 10 | BICF2P613853            | 26519542 | 0 | 0 | 0 | G |
| 10 | G591f53S23              | 26544854 | A | 0 | 0 | G |
| 10 | BICF2G630479506         | 26568383 | A | 1 | 1 | C |
| 10 | BICF2P511905            | 26605626 | 0 | 0 | 0 | A |
| 10 | BICF2P193245            | 26616318 | 0 | 0 | 0 | C |
| 10 | BICF2G630479515         | 26625528 | A | 0 | 0 | G |
| 10 | BICF2G630479516         | 26640723 | G | 0 | 0 | A |
| 10 | BICF2G630479522         | 26649403 | G | 0 | 0 | A |
| 10 | BICF2G630479527         | 26685677 | G | 1 | 1 | A |
| 10 | BICF2G630479530         | 26705650 | A | 0 | 0 | C |
| 10 | BICF2G630479531         | 26725806 | A | 1 | 1 | C |
| 10 | BICF2P1022170           | 26737348 | 0 | 0 | 0 | A |
| 10 | BICF2P147609            | 26739207 | 0 | 0 | 0 | G |
| 10 | BICF2S22919932          | 26760275 | A | 0 | 0 | G |
| 10 | BICF2S2297831           | 26764039 | G | 0 | 0 | A |
| 10 | TIGRP2P138950_rs8688784 | 26774397 | 0 | 0 | 0 | G |
| 10 | BICF2P1074346           | 26788124 | G | 0 | 0 | A |
| 10 | BICF2P302477            | 26798069 | 0 | 0 | 0 | G |
| 10 | BICF2P899683            | 26811503 | A | 0 | 0 | G |
| 10 | BICF2S24415766          | 26825274 | G | 0 | 0 | A |
| 10 | BICF2P139518            | 26859907 | G | 0 | 0 | A |
| 10 | BICF2S2393307           | 26878650 | G | 0 | 0 | A |
| 10 | BICF2G630479539         | 26887899 | A | 0 | 0 | G |
| 10 | TIGRP2P138951_rs8710659 | 26902510 | 0 | 0 | 0 | G |

|    |                 |          |   |      |        |   |
|----|-----------------|----------|---|------|--------|---|
| 10 | BICF2G630479553 | 26913515 | A | 1    | 1      | G |
| 10 | BICF2G630479564 | 26930101 | C | 1    | 1      | A |
| 10 | BICF2P437724    | 26986510 | G | 0    | 0      | A |
| 10 | BICF2P595974    | 26995373 | 0 | 0    | 0      | C |
| 10 | BICF2G630479566 | 27008667 | G | 0    | 0      | A |
| 10 | BICF2P861764    | 27017542 | 0 | 0    | 0      | C |
| 10 | BICF2G630479567 | 27035698 | A | 0    | 0      | G |
| 10 | BICF2S2343111   | 27051691 | T | 0    | 0      | A |
| 10 | BICF2P770847    | 27068594 | 0 | 0    | 0      | C |
| 10 | BICF2G630479569 | 27091084 | A | 0    | 0      | G |
| 10 | BICF2S2343115   | 27119242 | C | 0    | 0      | G |
| 10 | BICF2P124410    | 27144297 | 0 | 0    | 0      | A |
| 10 | BICF2P467422    | 27153536 | 0 | 0    | 0      | A |
| 10 | BICF2S2437318   | 27163464 | T | 0    | 0      | A |
| 10 | BICF2P508091    | 27180081 | 0 | 0    | 0      | A |
| 10 | BICF2P735960    | 27197266 | 0 | 0    | 0      | A |
| 10 | BICF2P846210    | 27216107 | 0 | 0    | 0      | G |
| 10 | BICF2G630479574 | 27249094 | A | 0    | 0      | C |
| 10 | BICF2G630479576 | 27286453 | A | 1    | 1      | G |
| 10 | BICF2G630479593 | 27290027 | A | 1    | 1      | G |
| 10 | BICF2P214331    | 27302496 | 0 | 0    | 0      | A |
| 10 | BICF2G630479641 | 27333038 | A | 0.25 | 0.2143 | C |
| 10 | BICF2G630479645 | 27336610 | A | 1    | 1      | G |
| 10 | BICF2G630479656 | 27362056 | G | 0    | 0      | A |
| 10 | BICF2G630479660 | 27372914 | A | 0    | 0      | G |
| 10 | BICF2G630479661 | 27382951 | G | 0    | 0      | A |
| 10 | BICF2P429596    | 27406026 | 0 | 0    | 0      | G |
| 10 | BICF2S2345856   | 27430553 | A | 0    | 0      | G |
| 10 | BICF2G630479687 | 27447367 | G | 0    | 0      | A |
| 10 | BICF2G630479692 | 27450838 | A | 0    | 0      | T |
| 10 | BICF2G630479722 | 27469289 | A | 0    | 0      | G |
| 10 | BICF2G630479756 | 27496654 | A | 0    | 0      | C |
| 10 | BICF2G630479770 | 27510776 | G | 0    | 0      | A |
| 10 | BICF2S23212868  | 27520501 | A | 0    | 0      | G |
| 10 | BICF2G630479796 | 27531056 | A | 0    | 0      | G |
| 10 | BICF2P63501     | 27551176 | T | 0    | 0      | A |
| 10 | BICF2P1258837   | 27556175 | G | 0    | 0      | A |
| 10 | BICF2G630479858 | 27592716 | A | 0    | 0      | G |
| 10 | BICF2P1322925   | 27608856 | G | 0    | 0      | A |
| 10 | BICF2G630479872 | 27617766 | T | 0    | 0      | A |
| 10 | BICF2G630479874 | 27624226 | A | 0    | 0      | G |
| 10 | BICF2P546574    | 27644959 | 0 | 0    | 0      | A |
| 10 | BICF2S23150971  | 27652075 | G | 0    | 0      | A |
| 10 | BICF2G630479879 | 27659686 | C | 0    | 0      | A |
| 10 | BICF2G630479883 | 27675650 | G | 0    | 0      | A |
| 10 | BICF2P501728    | 27695725 | A | 0    | 0      | G |
| 10 | BICF2P858171    | 27706507 | A | 0    | 0      | G |

|    |                         |          |   |   |   |   |
|----|-------------------------|----------|---|---|---|---|
| 10 | BICF2S2444969           | 27726241 | 0 | 0 | 0 | A |
| 10 | BICF2G630479896         | 27728559 | A | 0 | 0 | G |
| 10 | BICF2S23223941          | 27745162 | 0 | 0 | 0 | G |
| 10 | BICF2G630479899         | 27754718 | C | 0 | 0 | A |
| 10 | BICF2G630479905         | 27787936 | 0 | 0 | 0 | G |
| 10 | BICF2G630479908         | 27805633 | A | 0 | 0 | G |
| 10 | BICF2P539900            | 27807343 | A | 0 | 0 | G |
| 10 | BICF2P539899            | 27808738 | 0 | 0 | 0 | A |
| 10 | BICF2G630479915         | 27822055 | 0 | 0 | 0 | G |
| 10 | BICF2G630479918         | 27837113 | 0 | 0 | 0 | G |
| 10 | BICF2S23343127          | 27866141 | A | 0 | 0 | G |
| 10 | BICF2S2313423           | 27885444 | 0 | 0 | 0 | G |
| 10 | BICF2G630479932         | 27896307 | 0 | 0 | 0 | G |
| 10 | BICF2P1267216           | 27909117 | A | 0 | 0 | G |
| 10 | BICF2G630479934         | 27915422 | 0 | 0 | 0 | G |
| 10 | TIGRP2P138999_rs9019897 | 27956797 | 0 | 0 | 0 | G |
| 10 | BICF2P157476            | 27974681 | 0 | 0 | 0 | A |
| 10 | BICF2G630479937         | 27989652 | A | 0 | 0 | G |
| 10 | BICF2P526343            | 27999824 | 0 | 0 | 0 | G |
| 10 | BICF2P627139            | 28004122 | 0 | 0 | 0 | A |
| 10 | BICF2S22914364          | 28022932 | C | 0 | 0 | G |
| 10 | BICF2P411485            | 28028909 | 0 | 0 | 0 | G |
| 10 | BICF2G630479938         | 28038280 | 0 | 0 | 0 | G |
| 10 | BICF2G630479941         | 28052916 | C | 0 | 0 | A |
| 10 | BICF2G630479947         | 28061484 | A | 0 | 0 | C |
| 10 | BICF2G630479959         | 28088975 | A | 0 | 0 | G |
| 10 | BICF2G630479971         | 28101803 | C | 1 | 1 | G |
| 10 | BICF2G630479978         | 28114588 | A | 1 | 1 | G |
| 10 | BICF2G630479987         | 28127871 | G | 1 | 1 | A |
| 10 | BICF2G630479989         | 28134023 | G | 1 | 1 | A |
| 10 | BICF2G630480006         | 28148299 | A | 0 | 0 | G |
| 10 | BICF2G630480010         | 28155698 | G | 0 | 0 | A |
| 10 | BICF2G630480016         | 28168522 | C | 0 | 0 | A |
| 10 | BICF2G630480031         | 28179883 | A | 0 | 0 | G |
| 10 | BICF2G630480053         | 28193737 | G | 1 | 1 | A |
| 10 | BICF2G630480060         | 28198028 | A | 1 | 1 | G |
| 10 | BICF2P533951            | 28213655 | 0 | 0 | 0 | C |
| 10 | BICF2G630480080         | 28231373 | G | 0 | 0 | A |
| 10 | BICF2P1359589           | 28242551 | G | 0 | 0 | A |
| 10 | BICF2P599991            | 28254423 | 0 | 0 | 0 | C |
| 10 | BICF2G630480106         | 28265348 | A | 1 | 1 | G |
| 10 | BICF2S23031835          | 28271671 | A | 1 | 1 | G |
| 10 | BICF2P690393            | 28281504 | 0 | 0 | 0 | T |
| 10 | BICF2G630480120         | 28299320 | A | 1 | 1 | G |
| 10 | BICF2S23241272          | 28307578 | A | 0 | 0 | G |
| 10 | BICF2G630480137         | 28319763 | G | 0 | 0 | A |
| 10 | BICF2G630480148         | 28330929 | G | 0 | 0 | A |

|    |                         |          |   |   |       |   |
|----|-------------------------|----------|---|---|-------|---|
| 10 | BICF2G630480153         | 28343168 | A | 1 | 1     | G |
| 10 | BICF2G630480157         | 28351202 | A | 1 | 1     | G |
| 10 | BICF2G630480176         | 28369144 | A | 0 | 0     | G |
| 10 | BICF2G630480182         | 28376137 | A | 1 | 1     | G |
| 10 | BICF2G630480196         | 28392403 | A | 0 | 0     | G |
| 10 | BICF2G630480198         | 28395898 | C | 0 | 0     | A |
| 10 | TIGRP2P139006_rs8858819 | 28414175 | 0 | 0 | 0     | C |
| 10 | BICF2G630480205         | 28418845 | A | 1 | 1     | G |
| 10 | BICF2G630480215         | 28424937 | A | 1 | 1     | G |
| 10 | BICF2G630480227         | 28428303 | A | 1 | 1     | G |
| 10 | BICF2G630480253         | 28441191 | A | 1 | 1     | G |
| 10 | BICF2S2303469           | 28455265 | A | 0 | 0     | G |
| 10 | BICF2G630480267         | 28466658 | A | 0 | 0     | G |
| 10 | BICF2G630480288         | 28477259 | C | 0 | 0     | A |
| 10 | BICF2G630480301         | 28485598 | T | 0 | 0     | A |
| 10 | BICF2P858138            | 28497264 | A | 0 | 0     | G |
| 10 | BICF2P352626            | 28517955 | G | 0 | 0     | A |
| 10 | BICF2S22955637          | 28525628 | A | 0 | 0.125 | G |
| 10 | BICF2G630480335         | 28536849 | A | 0 | 0     | G |
| 10 | BICF2P1346434           | 28545838 | 0 | 0 | 0     | G |
| 10 | BICF2G630480347         | 28559396 | A | 1 | 1     | G |
| 10 | BICF2S2356319           | 28571342 | A | 1 | 1     | G |
| 10 | BICF2S23424933          | 28580298 | A | 1 | 1     | G |
| 10 | BICF2G630480354         | 28589111 | C | 0 | 0     | A |
| 10 | BICF2P429659            | 28602493 | A | 0 | 0     | T |
| 10 | BICF2P873939            | 28611525 | A | 0 | 0     | G |
| 10 | BICF2P287803            | 28618127 | A | 0 | 0     | G |
| 10 | BICF2P1250813           | 28623870 | A | 0 | 0     | G |
| 10 | BICF2P803201            | 28634185 | A | 1 | 1     | C |
| 10 | BICF2S23427091          | 28653741 | G | 0 | 0     | A |
| 10 | BICF2S23454756          | 28669053 | A | 0 | 0     | G |
| 10 | BICF2G630480363         | 28679071 | G | 0 | 0     | A |
| 10 | BICF2G630480370         | 28683599 | A | 1 | 1     | G |
| 10 | BICF2S23210932          | 28703870 | A | 1 | 1     | G |
| 10 | BICF2G630480381         | 28704923 | A | 0 | 0     | G |
| 10 | BICF2G630480390         | 28730144 | A | 1 | 1     | G |
| 10 | BICF2P1026927           | 28739263 | A | 0 | 0     | G |
| 10 | BICF2S23617771          | 28757040 | A | 0 | 0     | G |
| 10 | BICF2G630480418         | 28767979 | A | 0 | 0     | G |
| 10 | BICF2G630480420         | 28780641 | G | 0 | 0     | A |
| 10 | BICF2S23521427          | 28785076 | G | 0 | 0     | A |
| 10 | BICF2P1225894           | 28799474 | G | 0 | 0     | A |
| 10 | BICF2P1327063           | 28807405 | G | 1 | 1     | A |
| 10 | BICF2P1260545           | 28811570 | G | 0 | 0     | A |
| 10 | BICF2P1002095           | 28822740 | A | 0 | 0     | G |
| 10 | BICF2G630480475         | 28831926 | G | 1 | 1     | A |
| 10 | BICF2P1258797           | 28845807 | A | 0 | 0     | C |

|    |                         |          |   |   |   |   |
|----|-------------------------|----------|---|---|---|---|
| 10 | BICF2G630480494         | 28856014 | G | 0 | 0 | C |
| 10 | BICF2G630480499         | 28870183 | G | 0 | 0 | C |
| 10 | BICF2G630480510         | 28887899 | A | 0 | 0 | G |
| 10 | BICF2G630480527         | 28897956 | G | 0 | 0 | C |
| 10 | BICF2G630480539         | 28915781 | A | 0 | 0 | G |
| 10 | BICF2G630480548         | 28924870 | A | 0 | 0 | G |
| 10 | BICF2P863133            | 28945319 | 0 | 0 | 0 | A |
| 10 | BICF2S23751063          | 28947049 | G | 1 | 1 | A |
| 10 | BICF2P499640            | 28958264 | A | 0 | 0 | G |
| 10 | BICF2G630480574         | 28978764 | C | 0 | 0 | A |
| 10 | BICF2G630480575         | 28982590 | G | 0 | 0 | A |
| 10 | BICF2S23430126          | 29002046 | G | 0 | 0 | A |
| 10 | BICF2P1096973           | 29036575 | 0 | 0 | 0 | C |
| 10 | BICF2P457782            | 29047934 | A | 1 | 1 | G |
| 10 | BICF2P627080            | 29060173 | G | 0 | 0 | C |
| 10 | BICF2P122978            | 29065144 | A | 0 | 0 | C |
| 10 | BICF2G630480580         | 29083141 | A | 0 | 0 | G |
| 10 | BICF2G630480586         | 29094330 | A | 0 | 0 | G |
| 10 | BICF2G630480588         | 29095396 | A | 0 | 0 | G |
| 10 | BICF2G630480614         | 29108951 | A | 0 | 0 | G |
| 10 | BICF2G630480618         | 29121420 | G | 0 | 0 | A |
| 10 | BICF2G630480625         | 29131162 | A | 0 | 0 | G |
| 10 | BICF2P636949            | 29142653 | A | 1 | 1 | G |
| 10 | BICF2G630480641         | 29144137 | A | 0 | 0 | G |
| 10 | BICF2G630480647         | 29147943 | A | 0 | 0 | G |
| 10 | BICF2G630480648         | 29148511 | A | 0 | 0 | G |
| 10 | BICF2G630480656         | 29153068 | A | 0 | 0 | G |
| 10 | BICF2G630480666         | 29166027 | A | 0 | 0 | G |
| 10 | BICF2G630480671         | 29170470 | C | 0 | 0 | A |
| 10 | BICF2G630480680         | 29184257 | A | 0 | 0 | T |
| 10 | BICF2P743549            | 29200609 | 0 | 0 | 0 | A |
| 10 | BICF2G630480698         | 29211789 | A | 0 | 0 | G |
| 10 | BICF2G630480710         | 29221656 | A | 0 | 0 | G |
| 10 | BICF2P1464569           | 29238272 | G | 1 | 1 | C |
| 10 | BICF2P699387            | 29246912 | A | 1 | 1 | G |
| 10 | BICF2G630480756         | 29256503 | G | 0 | 0 | A |
| 10 | BICF2G630480778         | 29291533 | A | 0 | 0 | C |
| 10 | BICF2G630480790         | 29309276 | A | 0 | 0 | G |
| 10 | BICF2G630480793         | 29313604 | T | 1 | 1 | A |
| 10 | BICF2P177725            | 29328954 | A | 1 | 1 | G |
| 10 | BICF2P291764            | 29333941 | G | 1 | 1 | A |
| 10 | BICF2P965381            | 29339598 | G | 1 | 1 | A |
| 10 | BICF2G630480810         | 29357970 | G | 1 | 1 | A |
| 10 | TIGRP2P139030_rs9048754 | 29360072 | 0 | 0 | 0 | C |
| 10 | BICF2P484531            | 29360412 | G | 1 | 1 | A |
| 10 | BICF2P422982            | 29375782 | A | 0 | 0 | G |
| 10 | BICF2P1070918           | 29387001 | G | 0 | 0 | A |

|    |                         |          |   |   |   |   |
|----|-------------------------|----------|---|---|---|---|
| 10 | BICF2P1087828           | 29397063 | C | 1 | 1 | A |
| 10 | BICF2G630480826         | 29411685 | A | 0 | 0 | G |
| 10 | BICF2P434453            | 29421522 | 0 | 0 | 0 | C |
| 10 | BICF2P955401            | 29428913 | C | 1 | 1 | G |
| 10 | BICF2P240795            | 29454610 | 0 | 0 | 0 | G |
| 10 | BICF2S23048635          | 29484499 | A | 1 | 1 | G |
| 10 | BICF2S22950227          | 29502228 | C | 0 | 0 | A |
| 10 | TIGRP2P139031_rs9046711 | 29509997 | 0 | 0 | 0 | C |
| 10 | BICF2P298144            | 29549256 | 0 | 0 | 0 | C |
| 10 | BICF2S2331376           | 29559969 | C | 0 | 0 | G |
| 10 | BICF2G630480849         | 29569581 | G | 0 | 0 | A |
| 10 | BICF2G630480855         | 29581019 | A | 0 | 0 | G |
| 10 | BICF2P824888            | 29583609 | A | 0 | 0 | G |
| 10 | BICF2G630480862         | 29610414 | A | 0 | 0 | G |
| 10 | TIGRP2P139033_rs8969533 | 29617159 | 0 | 0 | 0 | G |
| 10 | BICF2P375792            | 29628142 | 0 | 0 | 0 | G |
| 10 | BICF2G630480874         | 29646273 | A | 1 | 1 | C |
| 10 | BICF2G630480878         | 29656570 | A | 0 | 0 | G |
| 10 | BICF2G630480881         | 29661047 | A | 0 | 0 | G |
| 10 | BICF2P567674            | 29679320 | G | 0 | 0 | A |
| 10 | BICF2S23745558          | 29682963 | C | 0 | 0 | G |
| 10 | BICF2G630480887         | 29693403 | G | 0 | 0 | A |
| 10 | BICF2S23715660          | 29723874 | C | 0 | 0 | A |
| 10 | BICF2S23518284          | 29735350 | A | 0 | 0 | G |
| 10 | BICF2P178140            | 29746894 | A | 0 | 0 | G |
| 10 | BICF2G630480954         | 29756061 | G | 1 | 1 | A |
| 10 | BICF2G630480963         | 29765847 | A | 1 | 1 | G |
| 10 | BICF2G630480983         | 29783274 | G | 1 | 1 | A |
| 10 | BICF2G630480987         | 29786485 | G | 1 | 1 | A |
| 10 | BICF2G630481003         | 29798765 | G | 1 | 1 | A |
| 10 | BICF2G630481028         | 29812523 | A | 1 | 1 | G |
| 10 | BICF2G630481045         | 29825115 | A | 0 | 0 | G |
| 10 | BICF2G630481055         | 29842662 | C | 0 | 0 | A |
| 10 | BICF2G630481078         | 29860593 | A | 1 | 1 | G |
| 10 | BICF2G630481087         | 29869233 | A | 0 | 0 | G |
| 10 | BICF2P1128224           | 29882451 | C | 1 | 1 | G |
| 10 | BICF2G630481096         | 29893305 | G | 0 | 0 | C |
| 10 | BICF2G630481097         | 29900366 | A | 0 | 0 | G |
| 10 | BICF2G630481115         | 29929504 | A | 1 | 1 | G |
| 10 | TIGRP2P139048_rs8547396 | 29938312 | 0 | 0 | 0 | G |
| 10 | BICF2P1033341           | 29948702 | A | 0 | 0 | G |
| 10 | BICF2G630481131         | 29961010 | C | 0 | 0 | A |
| 10 | BICF2P328126            | 29989763 | A | 0 | 0 | G |
| 10 | BICF2G630481139         | 29995659 | A | 0 | 0 | G |
| 10 | BICF2G630481140         | 29996199 | G | 1 | 1 | A |
| 10 | BICF2P1283413           | 30011809 | A | 0 | 0 | G |
| 10 | BICF2P782194            | 30019215 | A | 1 | 1 | G |

|    |                         |          |   |      |        |   |
|----|-------------------------|----------|---|------|--------|---|
| 10 | BICF2P631135            | 30028099 | A | 0    | 0      | T |
| 10 | BICF2G630481154         | 30045156 | A | 0    | 0      | G |
| 10 | BICF2P652681            | 30050768 | 0 | 0    | 0      | G |
| 10 | BICF2P633255            | 30062226 | A | 0    | 0      | G |
| 10 | TIGRP2P139052_rs8924301 | 30076310 | 0 | 0    | 0      | G |
| 10 | BICF2P22069             | 30087743 | 0 | 0    | 0      | G |
| 10 | BICF2P906018            | 30118992 | 0 | 0    | 0      | C |
| 10 | BICF2S23515819          | 30138371 | A | 0    | 0      | G |
| 10 | BICF2P683135            | 30145984 | 0 | 0    | 0      | C |
| 10 | BICF2P1048342           | 30164176 | A | 0    | 0      | G |
| 10 | BICF2S2307644           | 30170795 | A | 0    | 0      | G |
| 10 | BICF2P694040            | 30183338 | G | 0    | 0      | A |
| 10 | BICF2P803749            | 30197617 | 0 | 0    | 0      | G |
| 10 | BICF2P585845            | 30203858 | A | 0    | 0      | G |
| 10 | BICF2P675081            | 30215055 | G | 0    | 0      | C |
| 10 | BICF2P284563            | 30224871 | 0 | 0    | 0      | T |
| 10 | BICF2G630481165         | 30254753 | G | 0.25 | 0.2143 | A |
| 10 | BICF2S2366419           | 30256994 | G | 0.25 | 0.2143 | A |
| 10 | BICF2S23126999          | 30289594 | C | 0.25 | 0.2143 | G |
| 10 | BICF2S23126865          | 30293283 | T | 0.25 | 0.2143 | A |
| 10 | BICF2G630481173         | 30306341 | G | 0    | 0      | A |
| 10 | BICF2P1223854           | 30328432 | A | 0.25 | 0.2143 | G |
| 10 | BICF2P948046            | 30341380 | A | 0    | 0      | G |
| 10 | BICF2P804111            | 30348711 | A | 0.75 | 0.8333 | G |
| 10 | BICF2P1360603           | 30383943 | G | 0.75 | 0.7857 | A |
| 10 | BICF2P1227714           | 30401094 | G | 0.75 | 0.7857 | A |
| 10 | BICF2P85217             | 30407615 | A | 0.75 | 0.7857 | C |
| 10 | BICF2S23511874          | 30417661 | A | 0.75 | 0.7857 | G |
| 10 | BICF2G630481210         | 30442159 | A | 0    | 0      | G |
| 10 | BICF2P503104            | 30465695 | 0 | 0    | 0      | C |
| 10 | BICF2P261919            | 30475844 | A | 0    | 0      | G |
| 10 | BICF2G630481229         | 30487275 | A | 0    | 0      | G |
| 10 | BICF2G630481235         | 30506754 | A | 0.25 | 0.1667 | C |
| 10 | BICF2G630481242         | 30510101 | A | 0.75 | 0.7857 | G |
| 10 | BICF2G630481246         | 30531921 | A | 0    | 0      | G |
| 10 | BICF2P901008            | 30556612 | A | 0.75 | 0.7857 | G |
| 10 | BICF2P196644            | 30568894 | A | 0    | 0      | G |
| 10 | BICF2P160827            | 30587517 | G | 0.75 | 0.7857 | A |
| 10 | BICF2P953818            | 30591042 | A | 0.75 | 0.7857 | G |
| 10 | BICF2S2291658           | 30619221 | A | 0.75 | 0.7857 | G |
| 10 | BICF2G630481282         | 30634450 | A | 0    | 0      | C |
| 10 | BICF2G630481302         | 30645633 | G | 0    | 0      | A |
| 10 | BICF2G630481304         | 30646249 | G | 0    | 0      | A |
| 10 | BICF2G630481321         | 30654523 | A | 0    | 0      | C |
| 10 | BICF2G630481327         | 30659863 | A | 0    | 0      | C |
| 10 | BICF2G630481331         | 30671763 | A | 0    | 0      | G |
| 10 | BICF2G630481341         | 30686326 | A | 0    | 0      | G |



|    |                 |          |   |      |        |   |
|----|-----------------|----------|---|------|--------|---|
| 10 | BICF2P659334    | 30703917 | C | 0    | 0      | A |
| 10 | BICF2G630481362 | 30718289 | A | 0.25 | 0.2143 | G |
| 10 | BICF2P813464    | 30728672 | A | 0.25 | 0.2143 | G |
| 10 | BICF2S23763790  | 30753175 | A | 0.25 | 0.2143 | G |
| 10 | BICF2P254803    | 30756285 | C | 0    | 0      | A |
| 10 | BICF2G630481401 | 30768736 | G | 0    | 0      | A |
| 10 | BICF2G630481415 | 30785330 | A | 0    | 0      | G |
| 10 | BICF2G630481417 | 30786024 | G | 0.25 | 0.2143 | A |
| 10 | BICF2G630481447 | 30797637 | A | 0.25 | 0.2143 | C |
| 10 | BICF2G630481458 | 30810041 | C | 0.25 | 0.2143 | A |
| 10 | BICF2G630481465 | 30820492 | G | 0    | 0      | A |
| 10 | BICF2P989091    | 30833589 | A | 0.25 | 0.2143 | G |
| 10 | BICF2P781865    | 30847094 | G | 0.25 | 0.2143 | A |
| 10 | BICF2G630481479 | 30858274 | G | 0    | 0      | A |
| 10 | BICF2G630481484 | 30870742 | C | 0    | 0      | A |
| 10 | BICF2G630481501 | 30889828 | A | 0    | 0      | G |
| 10 | BICF2G630481508 | 30906324 | G | 0.25 | 0.2143 | A |
| 10 | BICF2G630481517 | 30915373 | A | 0.25 | 0.2143 | T |
| 10 | BICF2G630481530 | 30927164 | G | 0    | 0      | C |
| 10 | BICF2G630481540 | 30951911 | C | 1    | 1      | A |
| 10 | BICF2G630481564 | 30964709 | G | 0.5  | 0.5    | A |
| 10 | BICF2P470923    | 30976227 | A | 1    | 1      | G |
| 10 | BICF2P870186    | 30991821 | C | 1    | 1      | A |
| 10 | BICF2G630481596 | 30995122 | A | 1    | 1      | C |
| 10 | BICF2G630481637 | 31008291 | G | 1    | 1      | A |
| 10 | BICF2P238969    | 31021388 | C | 0.75 | 0.7143 | A |
| 10 | BICF2P1461580   | 31044184 | A | 0.75 | 0.7143 | G |
| 10 | BICF2P1175008   | 31058053 | A | 0.5  | 0.5    | G |
| 10 | BICF2P1091213   | 31067467 | G | 0    | 0      | A |
| 10 | BICF2G630481664 | 31074678 | A | 0.75 | 0.7143 | G |
| 10 | BICF2P1234798   | 31087984 | A | 0    | 0      | G |
| 10 | BICF2S23550073  | 31089847 | C | 0.25 | 0.2143 | A |
| 10 | BICF2G630481716 | 31098988 | C | 0    | 0      | A |
| 10 | BICF2G630481734 | 31111495 | A | 0    | 0      | G |
| 10 | BICF2G630481738 | 31115476 | A | 0.75 | 0.75   | G |
| 10 | BICF2G630481751 | 31128725 | A | 0.75 | 0.7143 | G |
| 10 | BICF2G630481758 | 31134023 | A | 0.75 | 0.7143 | C |
| 10 | BICF2G630481762 | 31145292 | A | 0.25 | 0.2143 | G |
| 10 | BICF2G630481767 | 31154636 | A | 0    | 0      | G |
| 10 | BICF2G630481773 | 31161067 | A | 0.25 | 0.2143 | G |
| 10 | BICF2G630481777 | 31167560 | A | 0.25 | 0.2143 | T |
| 10 | BICF2P693194    | 31178952 | 0 | 0    | 0      | G |
| 10 | BICF2G630481785 | 31188654 | A | 0.25 | 0.2143 | G |
| 10 | BICF2G630481793 | 31204463 | A | 0.25 | 0      | C |
| 10 | BICF2P1272248   | 31220644 | A | 0.5  | 0.5    | C |
| 10 | BICF2P1130920   | 31224224 | A | 0.5  | 0.5    | G |
| 10 | BICF2P705560    | 31234860 | A | 1    | 1      | G |

|    |                 |          |   |      |        |   |
|----|-----------------|----------|---|------|--------|---|
| 10 | BICF2P1403831   | 31247405 | A | 0.75 | 0.7143 | G |
| 10 | BICF2G630481843 | 31276530 | A | 0.5  | 0.5    | G |
| 10 | BICF2G630481850 | 31311505 | A | 0.5  | 0.5    | G |
| 10 | BICF2S23031816  | 31320947 | A | 0.5  | 0.5    | G |
| 10 | BICF2P131327    | 31341375 | 0 | 0    | 0      | C |
| 10 | BICF2G630481853 | 31380951 | G | 0.75 | 0.7143 | C |
| 10 | BICF2S23538928  | 31389876 | A | 0.5  | 0.5    | G |
| 10 | BICF2G630481854 | 31398282 | G | 0    | 0      | A |
| 10 | BICF2P264101    | 31440483 | 0 | 0    | 0      | A |
| 10 | BICF2G630481856 | 31453416 | A | 0    | 0      | G |
| 10 | BICF2P558841    | 31471268 | 0 | 0    | 0      | G |
| 10 | BICF2P607205    | 31481248 | A | 0    | 0      | C |
| 10 | BICF2S23655938  | 31494278 | G | 0.75 | 0.7143 | A |
| 10 | BICF2S23021687  | 31512564 | A | 0.5  | 0.5    | G |
| 10 | BICF2P499816    | 31529957 | A | 0    | 0      | G |
| 10 | BICF2S23323501  | 31546731 | A | 0.75 | 0.7143 | G |
| 10 | BICF2P984626    | 31557095 | 0 | 0    | 0      | G |
| 10 | BICF2G630481869 | 31588776 | G | 0.25 | 0.2857 | A |
| 10 | BICF2G630481882 | 31595217 | G | 0.25 | 0.2143 | A |
| 10 | BICF2P643538    | 31603131 | A | 0    | 0      | G |
| 10 | BICF2G630481933 | 31618974 | G | 0    | 0      | A |
| 10 | BICF2G630481980 | 31637315 | C | 0.5  | 0.5    | A |
| 10 | BICF2P25510     | 31648690 | A | 0    | 0      | G |
| 10 | BICF2P419905    | 31659642 | A | 0    | 0      | G |
| 10 | BICF2S23511731  | 31677742 | A | 0.25 | 0.2143 | G |
| 10 | BICF2G630482010 | 31685353 | G | 0.25 | 0.2143 | A |
| 10 | BICF2G630482027 | 31694344 | G | 0.25 | 0.2143 | A |
| 10 | BICF2G630482037 | 31714912 | A | 1    | 0.8333 | G |
| 10 | BICF2P645219    | 31725189 | A | 0.25 | 0.2143 | T |
| 10 | BICF2S23228865  | 31737530 | 0 | 0    | 0      | G |
| 10 | BICF2P664731    | 31759009 | C | 0.25 | 0.2857 | A |
| 10 | BICF2G630482063 | 31764736 | C | 0.25 | 0.2857 | A |
| 10 | BICF2G630482113 | 31781049 | A | 0.25 | 0.2857 | G |
| 10 | BICF2G630482135 | 31794383 | A | 0.25 | 0.2857 | G |
| 10 | BICF2G630482138 | 31799140 | A | 0.25 | 0.2857 | G |
| 10 | BICF2S22932828  | 31816674 | A | 0.5  | 0.5    | G |
| 10 | BICF2G630482158 | 31828872 | A | 0    | 0      | G |
| 10 | BICF2S23749083  | 31835290 | A | 0    | 0      | G |
| 10 | BICF2P1440469   | 31852506 | 0 | 0    | 0      | G |
| 10 | BICF2P1412373   | 31859130 | A | 0    | 0      | G |
| 10 | BICF2P228913    | 31869902 | 0 | 0    | 0      | A |
| 10 | BICF2G630482171 | 31894441 | A | 0    | 0      | G |
| 10 | BICF2G630482174 | 31903230 | A | 0    | 0      | G |
| 10 | BICF2G630482180 | 31915896 | 0 | 0    | 0      | G |
| 10 | BICF2G630482183 | 31925613 | G | 0    | 0      | A |
| 10 | BICF2G630482201 | 31942130 | G | 0.25 | 0.2857 | A |
| 10 | BICF2G630482212 | 31951428 | A | 0    | 0      | G |

|    |                 |          |   |      |        |   |
|----|-----------------|----------|---|------|--------|---|
| 10 | BICF2P801503    | 31962025 | A | 0    | 0      | G |
| 10 | BICF2P1231353   | 31971455 | A | 0    | 0      | G |
| 10 | BICF2P526424    | 31984573 | A | 0    | 0      | G |
| 10 | BICF2G630482245 | 31998236 | A | 0.75 | 0.7143 | G |
| 10 | BICF2G630482255 | 32004905 | G | 0.75 | 0.7143 | A |
| 10 | BICF2G630482257 | 32017218 | G | 0.75 | 0.7143 | A |
| 10 | BICF2P1052419   | 32050372 | C | 0    | 0      | G |
| 10 | BICF2G630482303 | 32055294 | A | 0.25 | 0.2857 | G |
| 10 | BICF2G630482308 | 32069848 | 0 | 0    | 0      | C |
| 10 | BICF2P569451    | 32074999 | G | 0    | 0      | A |
| 10 | BICF2G630482320 | 32087195 | G | 0.25 | 0.2857 | A |
| 10 | BICF2G630482328 | 32096502 | A | 0.5  | 0.5    | G |
| 10 | BICF2P846592    | 32130810 | G | 0.25 | 0.2857 | A |
| 10 | BICF2G630482347 | 32135313 | A | 0    | 0      | G |
| 10 | BICF2G630482361 | 32142710 | A | 0    | 0      | G |
| 10 | BICF2G630482381 | 32160246 | A | 0.5  | 0.5    | G |
| 10 | BICF2G630482386 | 32167224 | G | 0.5  | 0.5    | A |
| 10 | BICF2G630482397 | 32181570 | A | 0    | 0      | G |
| 10 | BICF2P1499453   | 32204394 | G | 0    | 0      | A |
| 10 | BICF2G630482460 | 32217199 | G | 0    | 0      | A |
| 10 | BICF2G630482472 | 32228192 | A | 0.75 | 0.7857 | G |
| 10 | BICF2G630482473 | 32258739 | C | 0.75 | 0.7857 | G |
| 10 | BICF2G630482474 | 32272203 | A | 0    | 0      | T |
| 10 | BICF2G630482475 | 32296059 | G | 0.5  | 0.5    | A |
| 10 | BICF2S23634087  | 32310484 | A | 0    | 0      | G |
| 10 | BICF2G630482478 | 32318202 | A | 0    | 0      | G |
| 10 | BICF2G630482484 | 32326764 | G | 0    | 0      | A |
| 10 | BICF2G630482494 | 32347459 | A | 0    | 0      | G |
| 10 | BICF2G630482510 | 32358578 | A | 0.25 | 0.2143 | T |
| 10 | BICF2G630482514 | 32371738 | G | 0    | 0      | A |
| 10 | BICF2G630482525 | 32377908 | G | 0    | 0      | A |
| 10 | BICF2G630482532 | 32386892 | A | 0    | 0      | G |
| 10 | BICF2G630482537 | 32397486 | A | 0    | 0      | G |
| 10 | BICF2G630482551 | 32417208 | A | 0    | 0      | G |
| 10 | BICF2G630482561 | 32422346 | A | 0    | 0      | G |
| 10 | BICF2G630482625 | 32438437 | C | 0    | 0      | A |
| 10 | BICF2G630482639 | 32443065 | G | 0.25 | 0.2143 | A |
| 10 | BICF2G630482650 | 32453140 | A | 0.25 | 0.2143 | C |
| 10 | BICF2G630482676 | 32475297 | T | 0.25 | 0.25   | A |
| 10 | BICF2G630482686 | 32481184 | A | 0    | 0      | G |
| 10 | BICF2G630482699 | 32495782 | A | 0.25 | 0.2857 | G |
| 10 | BICF2P592822    | 32530279 | 0 | 0    | 0      | C |
| 10 | BICF2P116460    | 32536946 | 0 | 0    | 0      | A |
| 10 | BICF2P720363    | 32548482 | A | 0    | 0      | G |
| 10 | BICF2G630482708 | 32566255 | G | 0.5  | 0.5    | A |
| 10 | BICF2P945657    | 32574281 | A | 0    | 0      | C |
| 10 | BICF2G630482722 | 32582792 | A | 0.25 | 0.2143 | G |

|    |                 |          |   |      |        |   |
|----|-----------------|----------|---|------|--------|---|
| 10 | BICF2P622311    | 32598504 | A | 0    | 0      | G |
| 10 | BICF2S23254641  | 32601327 | G | 0.25 | 0.2143 | A |
| 10 | BICF2P1026925   | 32610453 | G | 0.5  | 0.5    | A |
| 10 | BICF2G630482731 | 32610626 | 0 | 0    | 0      | G |
| 10 | BICF2G630482736 | 32617406 | A | 0.25 | 0.2143 | G |
| 10 | BICF2G630482749 | 32636451 | A | 0.25 | 0.2143 | C |
| 10 | BICF2G630482753 | 32641910 | A | 0.25 | 0.2857 | G |
| 10 | BICF2G630482757 | 32649952 | A | 0.25 | 0.2857 | G |
| 10 | BICF2G630482772 | 32661807 | A | 0.5  | 0.5    | C |
| 10 | BICF2G630482793 | 32672328 | A | 0.5  | 0.5    | G |
| 10 | BICF2P76987     | 32683899 | A | 0.5  | 0.3333 | G |
| 10 | BICF2S23115820  | 32692017 | A | 0.25 | 0.2143 | G |
| 10 | BICF2P692040    | 32708941 | G | 0.5  | 0.5    | A |
| 10 | BICF2P1027088   | 32727030 | A | 0.5  | 0.5    | G |
| 10 | BICF2P458155    | 32729129 | A | 0.25 | 0.2857 | G |
| 10 | BICF2G630482803 | 32745020 | 0 | 0    | 0      | A |
| 10 | BICF2P1442573   | 32753732 | 0 | 0    | 0      | C |
| 10 | BICF2S2342652   | 32764278 | G | 0.25 | 0.2857 | A |
| 10 | BICF2P224297    | 32765834 | G | 0.25 | 0.2857 | A |
| 10 | BICF2G630482828 | 32776929 | A | 0.5  | 0.5    | G |
| 10 | BICF2G630482849 | 32792764 | C | 0    | 0      | A |
| 10 | BICF2G630482873 | 32809636 | A | 0.25 | 0.2857 | G |
| 10 | BICF2G630482883 | 32821367 | G | 0.25 | 0.2857 | C |
| 10 | BICF2P485069    | 32833140 | 0 | 0    | 0      | A |
| 10 | BICF2S24117345  | 32846852 | A | 0.25 | 0.2857 | G |
| 10 | BICF2P1376911   | 32857479 | G | 0    | 0      | A |
| 10 | BICF2P1356547   | 32868354 | 0 | 0    | 0      | G |
| 10 | BICF2P1115174   | 32898129 | C | 1    | 0.75   | A |
| 10 | BICF2G630482891 | 32917906 | G | 0    | 0      | A |
| 10 | BICF2G630482894 | 32926024 | A | 0    | 0      | G |
| 10 | BICF2S23646033  | 32938690 | G | 0    | 0      | A |
| 10 | BICF2G630482908 | 32947939 | A | 0.5  | 0.5    | G |
| 10 | BICF2G630482928 | 32966040 | A | 0    | 0      | G |
| 10 | BICF2G630482936 | 32969930 | G | 0.25 | 0.2143 | C |
| 10 | BICF2P519982    | 32975151 | G | 0.25 | 0.2143 | A |
| 10 | BICF2G630482949 | 32986306 | G | 0.25 | 0.2857 | A |
| 10 | BICF2G630482966 | 33004123 | G | 0.25 | 0.2143 | A |
| 10 | BICF2G630482967 | 33006592 | A | 0.5  | 0.5    | G |
| 10 | BICF2S23727941  | 33021142 | G | 0.5  | 0.5    | A |
| 10 | BICF2G630482978 | 33071063 | A | 0    | 0      | C |
| 10 | BICF2P215267    | 33108030 | 0 | 0    | 0      | C |
| 10 | BICF2G630482980 | 33116849 | A | 0.5  | 0.5    | G |
| 10 | BICF2G630482990 | 33123810 | G | 0.5  | 0.5    | A |
| 10 | BICF2S22946995  | 33134376 | G | 0.5  | 0.5    | A |
| 10 | BICF2S23046311  | 33147353 | A | 0    | 0      | G |
| 10 | BICF2P119369    | 33155249 | A | 0.25 | 0.2857 | G |
| 10 | BICF2S23452942  | 33171776 | A | 0    | 0      | G |

|    |                         |          |   |      |        |   |
|----|-------------------------|----------|---|------|--------|---|
| 10 | BICF2P673602            | 33188495 | G | 0    | 0      | A |
| 10 | TIGRP2P139102_rs9032917 | 33192025 | 0 | 0    | 0      | G |
| 10 | BICF2P340937            | 33204931 | G | 0    | 0      | A |
| 10 | BICF2S23122996          | 33220018 | C | 0.25 | 0.2143 | A |
| 10 | BICF2P203687            | 33230819 | 0 | 0    | 0      | G |
| 10 | BICF2S22930557          | 33268557 | A | 0.25 | 0.2857 | G |
| 10 | BICF2S22934653          | 33272839 | C | 0.75 | 0.7143 | A |
| 10 | BICF2S23257104          | 33283422 | A | 0.25 | 0.2857 | G |
| 10 | BICF2P1118630           | 33304322 | G | 0.25 | 0.2143 | A |
| 10 | BICF2G630483055         | 33337475 | A | 0.25 | 0.2857 | G |
| 10 | BICF2G630483060         | 33346874 | G | 0.25 | 0.2857 | A |
| 10 | BICF2S23626371          | 33360149 | G | 0.5  | 0.5    | C |
| 10 | BICF2G630483082         | 33362950 | A | 0    | 0      | G |
| 10 | BICF2G630483090         | 33377776 | A | 0.25 | 0.2857 | G |
| 10 | BICF2G630483116         | 33384701 | G | 0.25 | 0.2857 | A |
| 10 | BICF2G630483134         | 33398943 | G | 0.25 | 0.2857 | A |
| 10 | BICF2G630483149         | 33410478 | A | 0.5  | 0.5    | G |
| 10 | BICF2G630483171         | 33422749 | G | 0.25 | 0.2857 | A |
| 10 | BICF2P916298            | 33439357 | C | 0    | 0      | A |
| 10 | BICF2P195845            | 33440968 | G | 0.25 | 0.2143 | A |
| 10 | BICF2G630483204         | 33443017 | A | 0    | 0      | G |
| 10 | BICF2P882366            | 33459715 | A | 0    | 0.2857 | G |
| 10 | BICF2G630483226         | 33465211 | A | 0    | 0      | C |
| 10 | BICF2G630483265         | 33476717 | G | 0.25 | 0.2857 | A |
| 10 | BICF2G630483294         | 33498510 | C | 0    | 0      | A |
| 10 | BICF2G630483295         | 33501973 | A | 0    | 0      | G |
| 10 | BICF2G630483311         | 33511036 | A | 0.5  | 0.5    | C |
| 10 | BICF2G630483342         | 33526072 | A | 0    | 0      | G |
| 10 | BICF2G630483348         | 33534843 | G | 0.5  | 0.5    | A |
| 10 | BICF2G630483372         | 33551299 | A | 0.75 | 0.7857 | G |
| 10 | BICF2G630483382         | 33558165 | G | 0.25 | 0.2857 | A |
| 10 | BICF2G630483413         | 33577571 | A | 0    | 0      | G |
| 10 | BICF2G630483416         | 33580749 | A | 0.5  | 0.5    | G |
| 10 | BICF2G630483425         | 33598752 | G | 0    | 0      | A |
| 10 | BICF2P458513            | 33609701 | G | 0.5  | 0.5    | A |
| 10 | BICF2P219712            | 33623489 | G | 0.5  | 0.5    | A |
| 10 | BICF2G630483436         | 33631802 | A | 0    | 0      | G |
| 10 | BICF2P260189            | 33638313 | G | 0.5  | 0.5    | A |
| 10 | BICF2P1402360           | 33650412 | A | 0    | 0      | G |
| 10 | BICF2P444140            | 33663758 | A | 0    | 0      | G |
| 10 | BICF2P640968            | 33678806 | G | 0.5  | 0.5    | A |
| 10 | BICF2P1304032           | 33680432 | A | 0    | 0      | G |
| 10 | TIGRP2P139112_rs8782588 | 33717317 | 0 | 0    | 0      | A |
| 10 | BICF2S2354515           | 33728178 | C | 0    | 0      | A |
| 10 | BICF2G630483452         | 33732477 | G | 0.5  | 0.5    | A |
| 10 | BICF2G630483458         | 33746398 | G | 0    | 0      | A |
| 10 | BICF2G630483465         | 33754327 | A | 0    | 0      | C |

|    |                 |          |   |      |        |   |
|----|-----------------|----------|---|------|--------|---|
| 10 | BICF2G630483473 | 33768320 | A | 0.5  | 0.5    | G |
| 10 | BICF2G630483488 | 33777044 | G | 0    | 0      | A |
| 10 | BICF2P977031    | 33780809 | A | 0    | 0      | G |
| 10 | BICF2G630483500 | 33793166 | A | 0.5  | 0.5    | G |
| 10 | BICF2G630483503 | 33798889 | A | 0    | 0      | G |
| 10 | BICF2G630483513 | 33811923 | C | 0.5  | 0.5    | A |
| 10 | BICF2G630483519 | 33822923 | G | 0.5  | 0.5    | A |
| 10 | BICF2G630483529 | 33836691 | A | 0.5  | 0.5    | G |
| 10 | BICF2G630483538 | 33848217 | A | 0    | 0      | G |
| 10 | BICF2G630483544 | 33857332 | G | 0    | 0      | A |
| 10 | BICF2P797002    | 33858548 | A | 0    | 0      | T |
| 10 | BICF2G630483556 | 33871772 | A | 0    | 0      | C |
| 10 | BICF2P1075313   | 33881765 | A | 0    | 0      | G |
| 10 | BICF2P754606    | 33892205 | A | 0    | 0      | G |
| 10 | BICF2G630483565 | 33913149 | A | 0.5  | 0.5    | G |
| 10 | BICF2P966926    | 33914574 | 0 | 0    | 0      | A |
| 10 | BICF2G630483573 | 33934660 | G | 0.5  | 0.5    | A |
| 10 | BICF2G630483581 | 33947018 | G | 0.5  | 0.5    | A |
| 10 | BICF2G630483585 | 33951415 | G | 0.5  | 0.5    | A |
| 10 | BICF2S23517561  | 33969545 | A | 0    | 0      | G |
| 10 | BICF2G630483608 | 33977607 | A | 0.5  | 0.5    | G |
| 10 | BICF2G630483622 | 33983939 | A | 0.5  | 0.5    | G |
| 10 | BICF2G630483642 | 33999026 | A | 0.5  | 0.5    | G |
| 10 | BICF2G630483656 | 34010482 | G | 0.5  | 0.5    | A |
| 10 | BICF2G630483667 | 34024241 | A | 0    | 0      | G |
| 10 | BICF2G630483685 | 34036743 | A | 0.25 | 0.2143 | G |
| 10 | BICF2G630483716 | 34047734 | G | 0    | 0      | A |
| 10 | BICF2P297904    | 34048614 | A | 0.25 | 0.2143 | T |
| 10 | BICF2P925977    | 34061886 | A | 0    | 0      | G |
| 10 | BICF2G630483733 | 34071996 | G | 0    | 0      | A |
| 10 | BICF2P1316652   | 34076957 | G | 0    | 0      | A |
| 10 | BICF2P729577    | 34087715 | A | 0.5  | 0.5    | G |
| 10 | BICF2P368223    | 34098518 | G | 0.25 | 0.2143 | A |
| 10 | BICF2S23513180  | 34113768 | G | 0.25 | 0.25   | A |
| 10 | BICF2P1222947   | 34128377 | A | 0.75 | 0.7143 | C |
| 10 | BICF2G630483753 | 34135370 | A | 0.75 | 0.7143 | G |
| 10 | BICF2G630483760 | 34161079 | G | 0    | 0      | A |
| 10 | BICF2G630483763 | 34170229 | 0 | 0    | 0      | A |
| 10 | BICF2G630483768 | 34179508 | A | 0.25 | 0.2143 | G |
| 10 | BICF2P857077    | 34197469 | C | 0.25 | 0.2143 | A |
| 10 | BICF2P481783    | 34213148 | A | 0.25 | 0.2143 | G |
| 10 | BICF2P253977    | 34242259 | G | 0    | 0      | A |
| 10 | BICF2S23043263  | 34256915 | A | 0    | 0      | G |
| 10 | BICF2P244935    | 34261081 | A | 0    | 0      | C |
| 10 | BICF2G630483809 | 34280381 | A | 0.75 | 0.7857 | G |
| 10 | BICF2G630483812 | 34281786 | A | 0.75 | 0.7857 | G |
| 10 | BICF2G630483825 | 34289308 | C | 0    | 0      | A |

|    |                 |          |   |      |        |   |
|----|-----------------|----------|---|------|--------|---|
| 10 | BICF2G630483828 | 34299844 | A | 0.75 | 0.7857 | G |
| 10 | BICF2G630483844 | 34308385 | A | 0    | 0      | C |
| 10 | BICF2G630483876 | 34331296 | G | 0.75 | 0.7857 | A |
| 10 | BICF2G630483888 | 34338472 | C | 0    | 0      | A |
| 10 | BICF2G630483891 | 34344700 | A | 0.25 | 0.2143 | G |
| 10 | BICF2G630483905 | 34353223 | G | 0.5  | 0.5    | A |
| 10 | BICF2G630483921 | 34363842 | A | 0    | 0      | G |
| 10 | BICF2P6692      | 34380250 | G | 0.25 | 0.2143 | A |
| 10 | BICF2P641734    | 34391228 | G | 0.25 | 0.2857 | A |
| 10 | BICF2S23414016  | 34403931 | A | 0.25 | 0.2143 | G |
| 10 | BICF2P1226077   | 34412330 | A | 0    | 0      | G |
| 10 | BICF2S23351406  | 34449453 | A | 0    | 0      | G |
| 10 | BICF2P1411955   | 34465237 | A | 0.25 | 0.2143 | C |
| 10 | BICF2S23111326  | 34479725 | G | 0.75 | 0.7857 | A |
| 10 | BICF2G630483950 | 34490429 | A | 0    | 0      | G |
| 10 | BICF2P1415713   | 34501647 | A | 0.75 | 0.7857 | G |
| 10 | BICF2G630483985 | 34510032 | A | 0.75 | 0.7857 | G |
| 10 | BICF2G630483993 | 34514153 | A | 0.75 | 0.7857 | G |
| 10 | BICF2G630484003 | 34522929 | G | 0.25 | 0.2143 | A |
| 10 | BICF2G630484007 | 34524769 | A | 0.75 | 0.7857 | G |
| 10 | BICF2G630484041 | 34540022 | C | 0    | 0      | A |
| 10 | BICF2G630484046 | 34547281 | G | 0.25 | 0.2143 | A |
| 10 | BICF2G630484059 | 34560548 | G | 1    | 1      | A |
| 10 | BICF2G630484074 | 34569271 | G | 1    | 1      | A |
| 10 | BICF2G630484099 | 34586842 | C | 1    | 1      | A |
| 10 | BICF2G630484104 | 34595242 | A | 0    | 0      | C |
| 10 | BICF2P1163786   | 34608495 | G | 0.25 | 0.2857 | A |
| 10 | BICF2G630484132 | 34616873 | A | 0.5  | 0.5    | C |
| 10 | BICF2G630484139 | 34626927 | C | 0.75 | 0.7857 | A |
| 10 | BICF2P1295719   | 34645237 | 0 | 0    | 0      | A |
| 10 | BICF2P676418    | 34688775 | 0 | 0    | 0      | G |
| 10 | BICF2G630484155 | 34704840 | A | 0.5  | 0.5    | G |
| 10 | BICF2G630484171 | 34760402 | C | 0    | 0      | A |
| 10 | BICF2G630484212 | 34794875 | A | 0.25 | 0.2857 | G |
| 10 | BICF2G630484214 | 34803510 | G | 0.25 | 0.25   | A |
| 10 | BICF2S22944440  | 34828003 | A | 0    | 0      | G |
| 10 | BICF2P472900    | 34848953 | 0 | 0    | 0      | A |
| 10 | BICF2G630484243 | 34869983 | G | 0.75 | 0.7857 | A |
| 10 | BICF2G630484251 | 34889887 | A | 0.75 | 0.7857 | C |
| 10 | BICF2G630484252 | 34898482 | G | 0.25 | 0.2143 | A |
| 10 | BICF2G630484255 | 34902618 | C | 0.75 | 0.7857 | A |
| 10 | BICF2G630484268 | 34914088 | A | 0.75 | 0.7857 | G |
| 10 | BICF2G630484270 | 34928992 | G | 0.75 | 0.7857 | A |
| 10 | BICF2G630484277 | 34944072 | A | 0.75 | 0.7857 | G |
| 10 | BICF2G630484279 | 34955000 | A | 0.75 | 0.7857 | G |
| 10 | BICF2G630484290 | 34968682 | A | 0.75 | 0.7857 | G |
| 10 | BICF2S23044409  | 34980697 | G | 0.5  | 0.4    | A |

|    |                 |          |   |      |        |   |
|----|-----------------|----------|---|------|--------|---|
| 10 | BICF2G630484319 | 34992238 | G | 0    | 0      | A |
| 10 | BICF2G630484335 | 35004815 | A | 0.75 | 0.7143 | G |
| 10 | BICF2G630484341 | 35006165 | A | 0.75 | 0.7143 | G |
| 10 | BICF2G630484364 | 35030555 | G | 0.75 | 0.7143 | A |
| 10 | BICF2G630484383 | 35044752 | A | 0.75 | 0.7143 | G |
| 10 | BICF2G630484389 | 35053576 | C | 0.75 | 0.7143 | A |
| 10 | BICF2S23331971  | 35080572 | A | 0.25 | 0.2143 | G |
| 10 | BICF2G630484432 | 35099037 | 0 | 0    | 0      | A |
| 10 | BICF2P816220    | 35128425 | G | 0    | 0      | A |
| 10 | BICF2P1031524   | 35153426 | C | 0    | 0      | A |
| 10 | BICF2S2294307   | 35159595 | A | 0    | 0      | G |
| 10 | BICF2P1224117   | 35167369 | A | 0.25 | 0.2857 | G |
| 10 | BICF2P850545    | 35185828 | C | 0    | 0      | A |
| 10 | BICF2P408985    | 35190000 | A | 0    | 0      | G |
| 10 | BICF2P1001790   | 35201146 | G | 0.25 | 0.2857 | A |
| 10 | BICF2P357488    | 35206534 | A | 0    | 0      | G |
| 10 | BICF2P750894    | 35220509 | G | NA   | 0      | C |
| 10 | BICF2P750895    | 35220658 | A | 0.5  | 0.5    | G |
| 10 | BICF2S23340539  | 35232472 | A | 0    | 0      | G |
| 10 | BICF2P185453    | 35241357 | A | 0.5  | 0.5    | C |
| 10 | BICF2G630484462 | 35272428 | G | 0.25 | 0.2857 | A |
| 10 | BICF2G630484469 | 35278281 | A | 0    | 0      | G |
| 10 | G593f26S145     | 35299424 | G | 0    | 0.25   | A |
| 10 | BICF2S23737992  | 35324850 | A | 0    | 0      | G |
| 10 | BICF2S22938822  | 35340366 | G | 0.5  | 0.5    | A |
| 10 | BICF2P226117    | 35364798 | 0 | 0    | 0      | A |
| 10 | BICF2S23029368  | 35381802 | A | 0    | 0      | G |
| 10 | BICF2S23547957  | 35414752 | A | 0    | 0      | G |
| 10 | BICF2P1254781   | 35434916 | 0 | 0    | 0      | A |
| 10 | BICF2G630484478 | 35457194 | A | 0.5  | 0.5    | G |
| 10 | BICF2G630484489 | 35473379 | A | 0    | 0      | G |
| 10 | BICF2G630484492 | 35476192 | G | 0.25 | 0.2143 | A |
| 10 | BICF2G630484496 | 35482081 | G | 0.75 | 0.7143 | A |
| 10 | BICF2G630484505 | 35496374 | T | 0.75 | 0.7143 | A |
| 10 | BICF2G630484516 | 35504902 | A | 0    | 0      | G |
| 10 | BICF2G630484524 | 35518182 | A | 0.25 | 0.2857 | G |
| 10 | BICF2G630484546 | 35540046 | G | 1    | 1      | C |
| 10 | BICF2G630484554 | 35550159 | G | 0.5  | 0.5    | A |
| 10 | BICF2G630484583 | 35569350 | G | 1    | 1      | A |
| 10 | BICF2S22957362  | 35579758 | A | 0.25 | 0.2857 | G |
| 10 | BICF2G630484604 | 35581061 | G | 0.5  | 0.5    | A |
| 10 | BICF2G630484618 | 35592796 | A | 0.25 | 0.2857 | G |
| 10 | BICF2G630484630 | 35607143 | G | 0    | 0      | A |
| 10 | BICF2G630484635 | 35619078 | A | 0    | 0      | G |
| 10 | BICF2G630484650 | 35636842 | A | 1    | 1      | G |
| 10 | BICF2S23239859  | 35642060 | A | 0    | 0      | G |
| 10 | BICF2G630484676 | 35654092 | A | 0    | 0      | G |



|    |                         |          |   |      |        |   |
|----|-------------------------|----------|---|------|--------|---|
| 10 | BICF2P758541            | 35667447 | 0 | 0    | 0      | A |
| 10 | BICF2G630484694         | 35674195 | C | 0.75 | 0.7857 | A |
| 10 | BICF2G630484713         | 35685617 | G | 0.5  | 0.5    | A |
| 10 | BICF2G630484733         | 35696731 | A | 0.5  | 0.5    | G |
| 10 | TIGRP2P139161_rs8677769 | 35721335 | 0 | 0    | 0      | A |
| 10 | BICF2G630484771         | 35739669 | A | 0.25 | 0.2857 | G |
| 10 | BICF2G630484791         | 35755614 | C | 0    | 0      | A |
| 10 | BICF2G630484800         | 35765777 | G | 0.75 | 0.7143 | A |
| 10 | BICF2P168087            | 35769412 | C | 0    | 0      | G |
| 10 | BICF2S23610938          | 35769490 | A | 0    | 0      | G |
| 10 | BICF2P983899            | 35778878 | G | 0.75 | 0.7143 | A |
| 10 | BICF2G630484842         | 35791106 | G | 0    | 0      | A |
| 10 | BICF2G630484859         | 35799855 | A | 0    | 0      | G |
| 10 | BICF2P172107            | 35821405 | A | 0    | 0      | G |
| 10 | BICF2G630484882         | 35827747 | A | 0    | 0      | G |
| 10 | BICF2P641309            | 35835352 | G | 0.5  | 0.5    | A |
| 10 | BICF2P1068469           | 35841236 | G | 0    | 0      | A |
| 10 | BICF2G630484888         | 35846621 | A | 0    | 0      | G |
| 10 | BICF2P947256            | 35862062 | G | 1    | 1      | A |
| 10 | BICF2P1272878           | 35867390 | G | 0.5  | 0.5    | A |
| 10 | BICF2S23223668          | 35869398 | A | 0.5  | 0.5    | G |
| 10 | BICF2P958865            | 35880528 | 0 | 0    | 0      | A |
| 10 | BICF2P1308431           | 35899962 | G | 0.5  | 0.5    | A |
| 10 | BICF2G630484921         | 35904855 | A | 1    | 1      | G |
| 10 | BICF2G630484943         | 35914869 | G | 1    | 1      | A |
| 10 | BICF2G630484957         | 35933728 | A | 0    | 0      | G |
| 10 | BICF2G630484960         | 35938737 | A | 0.25 | 0.2143 | G |
| 10 | BICF2G630484973         | 35950340 | G | 0.25 | 0.2143 | A |
| 10 | BICF2G630484988         | 35972484 | 0 | 0    | 0      | G |
| 10 | BICF2P633275            | 35976301 | A | 0.25 | 0.25   | G |
| 10 | BICF2G630484989         | 35983885 | A | 0    | 0      | G |
| 10 | BICF2P1001580           | 35996540 | G | 0.25 | 0.2857 | A |
| 10 | BICF2G630484994         | 36010673 | A | 0.75 | 0.7143 | G |
| 10 | BICF2G630485019         | 36029330 | A | 0    | 0      | C |
| 10 | BICF2G630485020         | 36029382 | A | 0    | 0      | G |
| 10 | BICF2G630485074         | 36048450 | G | 0    | 0      | A |
| 10 | BICF2P390372            | 36050874 | A | 0    | 0      | C |
| 10 | BICF2G630485082         | 36054599 | G | 1    | 1      | A |
| 10 | BICF2P1029702           | 36065030 | C | 0.75 | 0.8333 | A |
| 10 | BICF2P468087            | 36085590 | G | 1    | 1      | A |
| 10 | BICF2P534526            | 36094752 | A | 0    | 0      | G |
| 10 | BICF2P385231            | 36103342 | G | 0    | 0      | A |
| 10 | BICF2P613676            | 36117781 | C | 0.75 | 0.7857 | A |
| 10 | BICF2P613678            | 36117960 | G | 0    | 0      | A |
| 10 | BICF2P146712            | 36123523 | C | 0.25 | 0.2143 | A |
| 10 | BICF2G630485114         | 36133793 | A | 0    | 0      | G |
| 10 | BICF2G630485132         | 36151785 | A | 0.75 | 0.7857 | G |

|    |                 |          |   |      |        |   |
|----|-----------------|----------|---|------|--------|---|
| 10 | BICF2G630485158 | 36163718 | G | 0.25 | 0.2857 | A |
| 10 | BICF2G630485166 | 36171602 | A | 0.5  | 0.5    | G |
| 10 | BICF2G630485187 | 36187500 | A | 0.25 | 0.2857 | C |
| 10 | BICF2S2374903   | 36191239 | 0 | 0    | 0      | G |
| 10 | BICF2P765696    | 36212359 | G | 0    | 0      | A |
| 10 | BICF2G630485198 | 36227153 | A | 0.25 | 0.2143 | G |
| 10 | BICF2P1139618   | 36236963 | A | 0.5  | 0.5    | C |
| 10 | BICF2G630485212 | 36254448 | G | 0.25 | 0.2857 | C |
| 10 | BICF2P464497    | 36264085 | G | 0    | 0      | A |
| 10 | BICF2G630485221 | 36272016 | A | 0    | 0      | G |
| 10 | BICF2S23421042  | 36285230 | A | 0.25 | 0.2143 | T |
| 10 | BICF2P72997     | 36303081 | A | 0    | 0      | G |
| 10 | BICF2P315835    | 36309755 | A | 0    | 0      | G |
| 10 | BICF2G630485250 | 36318564 | A | 0    | 0      | G |
| 10 | BICF2S23729041  | 36330798 | A | 0    | 0      | G |
| 10 | BICF2S23644288  | 36338091 | 0 | 0    | 0      | A |
| 10 | BICF2S23019562  | 36348924 | G | 0.5  | 0.5    | A |
| 10 | BICF2G630485264 | 36358268 | G | 0.5  | 0.5    | A |
| 10 | BICF2G630485272 | 36370981 | A | 0.25 | 0.2857 | T |
| 10 | BICF2G630485275 | 36385873 | G | 0    | 0.2857 | A |
| 10 | BICF2G630485281 | 36394293 | G | 0    | 0      | A |
| 10 | BICF2G630485296 | 36415357 | A | 0.5  | 0.5    | G |
| 10 | BICF2G630485302 | 36426227 | G | 0.25 | 0.2143 | A |
| 10 | BICF2G630485313 | 36435273 | C | 0.25 | 0.2143 | G |
| 10 | BICF2G630485317 | 36455053 | A | 0.25 | 0.2857 | G |
| 10 | BICF2S2446212   | 36496240 | A | 0.25 | 0.2143 | G |
| 10 | BICF2G630485322 | 36501357 | A | 0    | 0      | C |
| 10 | BICF2G630485339 | 36512740 | G | 0.75 | 0.7143 | A |
| 10 | BICF2G630485358 | 36539165 | A | 0.25 | 0.2857 | G |
| 10 | BICF2P69729     | 36548655 | G | 1    | 1      | A |
| 10 | BICF2P901724    | 36562792 | G | 1    | 1      | A |
| 10 | BICF2G630485397 | 36571549 | T | 0    | 0      | A |
| 10 | BICF2G630485404 | 36583771 | A | 0    | 0      | G |
| 10 | BICF2G630485414 | 36595189 | A | 0.75 | 0.7143 | G |
| 10 | BICF2G630485432 | 36604679 | A | 0.75 | 0.7143 | G |
| 10 | BICF2G630485439 | 36618801 | A | 0.25 | 0.2857 | G |
| 10 | BICF2G630485455 | 36630724 | A | 0.75 | 0.7143 | G |
| 10 | BICF2G630485476 | 36635539 | T | 0.75 | 0.7143 | A |
| 10 | BICF2G630485495 | 36640641 | A | 0.75 | 0.7143 | G |
| 10 | BICF2S23249420  | 36652031 | G | 0    | 0      | A |
| 10 | BICF2P225158    | 36664946 | A | 0    | 0      | G |
| 10 | BICF2P1050395   | 36676410 | C | 0    | 0      | G |
| 10 | BICF2P1050396   | 36676868 | A | 0    | 0      | G |
| 10 | BICF2P313700    | 36690495 | A | 0    | 0      | G |
| 10 | BICF2G630485528 | 36697246 | G | 1    | 1      | A |
| 10 | BICF2G630485534 | 36707610 | G | 0    | 0      | C |
| 10 | BICF2G630485535 | 36708257 | A | 0    | 0      | G |

|    |                         |          |   |      |        |   |
|----|-------------------------|----------|---|------|--------|---|
| 10 | BICF2G630485552         | 36722348 | G | 0.25 | 0.2857 | A |
| 10 | BICF2G630485557         | 36739145 | G | 0.75 | 0.7143 | A |
| 10 | BICF2G630485558         | 36746896 | T | 0    | 0      | A |
| 10 | BICF2G630485572         | 36756464 | G | 1    | 1      | A |
| 10 | BICF2P515967            | 36773989 | A | 1    | 1      | G |
| 10 | BICF2G630485595         | 36787230 | A | 0    | 0      | G |
| 10 | BICF2P884049            | 36790501 | G | 1    | 1      | A |
| 10 | TIGRP2P139177_rs8843170 | 36802957 | 0 | 0    | 0      | G |
| 10 | BICF2G630485620         | 36813234 | A | 0    | 0      | G |
| 10 | BICF2G630485638         | 36825374 | A | 0    | 0      | G |
| 10 | BICF2G630485650         | 36840456 | G | 0    | 0      | A |
| 10 | BICF2G630485655         | 36850489 | G | 1    | 1      | A |
| 10 | BICF2G630485667         | 36864810 | G | 1    | 1      | A |
| 10 | BICF2G630485675         | 36870957 | C | 0    | 0      | A |
| 10 | BICF2S2313581           | 36884042 | A | 0    | 0      | G |
| 10 | BICF2G630485706         | 36895004 | G | 0    | 0      | A |
| 10 | BICF2G630485762         | 36911677 | A | 1    | 1      | G |
| 10 | BICF2G630485768         | 36913486 | A | 1    | 1      | G |
| 10 | BICF2G630485773         | 36918678 | A | 1    | 1      | G |
| 10 | BICF2P1384152           | 36928192 | A | 1    | 1      | C |
| 10 | BICF2P1384151           | 36929023 | A | 1    | 1      | G |
| 10 | BICF2S23258698          | 36939685 | C | 1    | 1      | G |
| 10 | BICF2P768416            | 36964111 | A | 1    | 1      | C |
| 10 | BICF2P1075514           | 36993575 | A | 0.75 | 0.7143 | G |
| 10 | BICF2S2329886           | 37006910 | T | 1    | 1      | A |
| 10 | BICF2S23146524          | 37009227 | C | 0    | 0      | A |
| 10 | BICF2P959863            | 37020464 | A | 0.75 | 0.7143 | G |
| 10 | BICF2P1372903           | 37027295 | A | 0.75 | 0.7143 | C |
| 10 | BICF2P897774            | 37040713 | G | 0.75 | 0.7143 | A |
| 10 | TIGRP2P139182_rs8992083 | 37052947 | 0 | 0    | 0      | C |
| 10 | BICF2P606577            | 37053018 | G | 0.75 | 0.7143 | A |
| 10 | BICF2P919741            | 37071036 | G | 0.75 | 0.7143 | A |
| 10 | BICF2P64311             | 37084539 | A | 1    | 1      | G |
| 10 | BICF2P1150171           | 37094655 | G | 0.25 | 0.2857 | A |
| 10 | BICF2P1214424           | 37107029 | A | 0.25 | 0.2857 | G |
| 10 | BICF2P1162810           | 37110847 | C | 0.25 | 0.2857 | G |
| 10 | BICF2P42717             | 37131708 | 0 | 0    | 0      | A |
| 10 | BICF2S2343707           | 37143412 | C | 0.25 | 0.2857 | A |
| 10 | G594f11S246             | 37149625 | G | 0    | 0      | A |
| 10 | G594f17S29              | 37179771 | G | 0.25 | 0.2857 | C |
| 10 | TIGRP2P139191_rs8568966 | 37205872 | 0 | 0    | 0      | G |
| 10 | BICF2P286426            | 37223324 | G | 0.25 | 0.2857 | A |
| 10 | BICF2P382404            | 37225797 | A | 0.75 | 0.7143 | G |
| 10 | BICF2S23246356          | 37250415 | C | 0    | 0      | A |
| 10 | BICF2P763246            | 37283540 | C | 0    | 0      | A |
| 10 | BICF2P1465180           | 37299733 | A | 0    | 0      | C |
| 10 | BICF2P1440689           | 37324816 | G | 0.25 | 0.2857 | A |

|    |                         |          |   |      |        |   |
|----|-------------------------|----------|---|------|--------|---|
| 10 | BICF2P1024485           | 37336606 | G | 1    | 1      | A |
| 10 | BICF2P425578            | 37345910 | 0 | 0    | 0      | G |
| 10 | BICF2P219667            | 37352459 | G | 1    | 1      | A |
| 10 | BICF2P468594            | 37368056 | A | 0    | 0      | G |
| 10 | TIGRP2P139195_rs8828572 | 37377429 | 0 | 0    | 0      | G |
| 10 | BICF2P239529            | 37389769 | 0 | 0    | 0      | A |
| 10 | BICF2P736516            | 37399207 | 0 | 0    | 0      | G |
| 10 | BICF2S23148212          | 37412358 | G | 0.75 | 0.7857 | A |
| 10 | BICF2P1406287           | 37422188 | G | 0.75 | 0.7857 | A |
| 10 | BICF2P771630            | 37435268 | 0 | 0    | 0      | G |
| 10 | G595f15S150             | 37459379 | A | 0    | 0      | G |
| 10 | BICF2P1278074           | 37477990 | T | 0.75 | 0.7857 | A |
| 10 | BICF2P520325            | 37481223 | A | 0.25 | 0.2857 | G |
| 10 | BICF2P1391279           | 37492411 | A | 0    | 0      | G |
| 10 | BICF2P1404951           | 37505647 | A | 0.75 | 0.7857 | G |
| 10 | BICF2P405508            | 37517209 | G | 1    | 1      | A |
| 10 | BICF2S22936758          | 37554220 | A | 0.5  | 0.5    | G |
| 10 | BICF2P242040            | 37559961 | G | 0    | 0      | A |
| 10 | BICF2S2367757           | 37587626 | C | 0    | 0      | A |
| 10 | BICF2S23713782          | 37594337 | C | 0    | 0      | G |
| 10 | BICF2S23060073          | 37605651 | A | 0    | 0      | G |
| 10 | BICF2P254600            | 37620538 | A | 0    | 0      | G |
| 10 | TIGRP2P139200_rs8818017 | 37630079 | 0 | 0    | 0      | A |
| 10 | BICF2S23022363          | 37647571 | G | 0    | 0      | A |
| 10 | BICF2S23619213          | 37652895 | G | 0    | 0      | C |
| 10 | BICF2S23410471          | 37667988 | A | 0.25 | 0.2143 | G |
| 10 | BICF2S23439635          | 37675509 | A | 0.25 | 0.2143 | G |
| 10 | BICF2P159936            | 37682574 | A | 0    | 0      | G |
| 10 | BICF2P164006            | 37687688 | A | 0    | 0      | G |
| 10 | BICF2P1378112           | 37712100 | G | 0    | 0      | A |
| 10 | BICF2P979124            | 37716238 | G | 1    | 1      | C |
| 10 | BICF2P629340            | 37717246 | A | 0    | 0      | G |
| 10 | BICF2S23213996          | 37730090 | T | 1    | 1      | A |
| 10 | BICF2S23124381          | 37755253 | G | 0.5  | 0.5    | A |
| 10 | BICF2S23319672          | 37776039 | C | 0.5  | 0.5    | A |
| 10 | BICF2P1238518           | 37778220 | A | 0    | 0      | T |
| 10 | BICF2P1374437           | 37786454 | A | 0    | 0      | G |
| 10 | BICF2P541826            | 37791609 | A | 0    | 0      | G |
| 10 | BICF2S23714804          | 37801706 | T | 1    | 1      | A |
| 10 | BICF2P795958            | 37809914 | T | 0    | 0      | A |
| 10 | BICF2P711598            | 37818834 | G | 0.25 | 0.2857 | A |
| 10 | BICF2S22919745          | 37823788 | A | 0.25 | 0.2857 | C |
| 10 | BICF2P396998            | 37835322 | A | 0    | 0      | T |
| 10 | BICF2P721675            | 37846943 | G | 0.75 | 1      | A |
| 10 | BICF2P1314217           | 37864196 | A | 0.5  | 0.5    | G |
| 10 | BICF2P478892            | 37877299 | A | 0.5  | 0.5    | G |
| 10 | BICF2P119336            | 37883448 | G | 0.75 | 0.7857 | A |

|    |                         |          |   |      |        |   |
|----|-------------------------|----------|---|------|--------|---|
| 10 | BICF2P771063            | 37911827 | A | 0    | 0      | C |
| 10 | BICF2P1044300           | 37926345 | G | 0.75 | 0.7143 | A |
| 10 | BICF2P282943            | 37928801 | T | 0.75 | 0.7143 | A |
| 10 | TIGRP2P139206_rs9105364 | 37942810 | 0 | 0    | 0      | A |
| 10 | BICF2S23634322          | 37953471 | G | 0.25 | 0.2143 | A |
| 10 | BICF2P1231523           | 37963579 | 0 | 0    | 0      | G |
| 10 | BICF2P290500            | 37982890 | 0 | 0    | 0      | G |
| 10 | BICF2P461544            | 37989904 | G | 0    | 0      | A |
| 10 | BICF2P656484            | 37996908 | A | 0.5  | 0.5    | G |
| 10 | BICF2P868755            | 38017794 | G | 0    | 0      | A |
| 10 | BICF2P632945            | 38025066 | A | 0    | 0      | T |
| 10 | BICF2S23256222          | 38035059 | A | 0    | 0      | G |
| 10 | BICF2P497921            | 38049725 | A | 0    | 0      | G |
| 10 | BICF2P777345            | 38065028 | A | 0    | 0      | G |
| 10 | BICF2G630485797         | 38087206 | G | 0    | 0      | A |
| 10 | BICF2G630485826         | 38102328 | A | 0    | 0      | G |
| 10 | BICF2P271475            | 38113644 | 0 | 0    | 0      | G |
| 10 | BICF2G630485847         | 38122987 | G | 0    | 0      | A |
| 10 | BICF2P735686            | 38146776 | 0 | 0    | 0      | G |
| 10 | BICF2G630485873         | 38163826 | G | 0    | 0      | A |
| 10 | BICF2G630485878         | 38175728 | G | 0    | 0      | A |
| 10 | BICF2P1118910           | 38190033 | 0 | 0    | 0      | G |
| 10 | TIGRP2P139214_rs9115464 | 38199920 | 0 | 0    | 0      | A |
| 10 | BICF2P1194143           | 38214637 | A | 0    | 0      | C |
| 10 | BICF2G630485921         | 38233148 | 0 | 0    | 0      | G |
| 10 | BICF2P1448673           | 38238248 | 0 | 0    | 0      | G |
| 10 | BICF2P317616            | 38250495 | C | 0    | 0      | A |
| 10 | BICF2P944326            | 38272861 | 0 | 0    | 0      | G |
| 10 | BICF2P1146446           | 38284969 | A | 0    | 0      | C |
| 10 | BICF2P485230            | 38304191 | C | 0.25 | 0.2143 | G |
| 10 | BICF2P516380            | 38319800 | 0 | 0    | 0      | A |
| 10 | BICF2S23431289          | 38333156 | A | 0.5  | 0.5    | G |
| 10 | TIGRP2P139216_rs8542476 | 38345804 | 0 | 0    | 0      | C |
| 10 | BICF2S23226305          | 38356815 | A | 0    | 0      | G |
| 10 | BICF2G630485926         | 38368136 | 0 | 0    | 0      | G |
| 10 | BICF2G630485966         | 38387719 | 0 | 0    | 0      | G |
| 10 | BICF2G630485982         | 38393602 | C | 0.5  | 0.5    | G |
| 10 | BICF2S22932100          | 38399056 | A | 0.5  | 0.5    | C |
| 10 | BICF2G630486003         | 38419922 | G | 0    | 0      | A |
| 10 | BICF2G630486011         | 38424180 | C | 0    | 0      | A |
| 10 | BICF2G630486023         | 38439553 | A | 0    | 0      | G |
| 10 | BICF2G630486028         | 38449331 | 0 | 0    | 0      | G |
| 10 | BICF2G630486037         | 38458112 | A | 0    | 0      | G |
| 10 | BICF2G630486059         | 38474301 | A | 0    | 0.25   | G |
| 10 | BICF2G630486061         | 38487153 | A | 0.25 | 0.2857 | G |
| 10 | BICF2G630486075         | 38497735 | A | 1    | 1      | G |
| 10 | BICF2G630486084         | 38505347 | A | 1    | 1      | G |

|    |                         |          |   |      |        |   |
|----|-------------------------|----------|---|------|--------|---|
| 10 | BICF2G630486096         | 38514454 | A | 1    | 1      | G |
| 10 | BICF2G630486124         | 38534770 | 0 | 0    | 0      | G |
| 10 | BICF2G630486134         | 38543105 | G | 1    | 1      | A |
| 10 | BICF2G630486143         | 38551602 | A | 1    | 1      | G |
| 10 | BICF2P775928            | 38580411 | A | 0.25 | 0.2857 | G |
| 10 | BICF2P1340850           | 38602054 | A | 0.75 | 0.7143 | G |
| 10 | BICF2S2318225           | 38607019 | A | 0    | 0      | G |
| 10 | BICF2S23152609          | 38621402 | A | 0    | 0      | G |
| 10 | BICF2P139769            | 38639092 | A | 0.75 | 0.7143 | C |
| 10 | BICF2P1332866           | 38646573 | A | 1    | 0.7143 | C |
| 10 | BICF2P1058648           | 38660698 | A | 0.75 | 0.7143 | G |
| 10 | BICF2G630486196         | 38686708 | G | 0    | 0      | A |
| 10 | BICF2G630486208         | 38698465 | G | 0.5  | 0.5    | A |
| 10 | BICF2S23010067          | 38730284 | 0 | 0    | 0      | G |
| 10 | BICF2G630486231         | 38750810 | G | 0.75 | 0.7143 | A |
| 10 | BICF2P100100            | 38758578 | 0 | 0    | 0      | A |
| 10 | BICF2P1180602           | 38767211 | 0 | 0    | 0      | G |
| 10 | BICF2S2307147           | 38786406 | 0 | 0    | 0      | A |
| 10 | BICF2P1178659           | 38798721 | A | 0.5  | 0.5    | G |
| 10 | TIGRP2P139242_rs8652605 | 38838964 | 0 | 0    | 0      | G |
| 10 | TIGRP2P139247_rs8901726 | 38864204 | 0 | 0    | 0      | C |
| 10 | BICF2P1150929           | 38887016 | G | 0.75 | 0.7857 | A |
| 10 | BICF2P1151282           | 38888423 | A | 0.75 | 0.7857 | G |
| 10 | BICF2P934261            | 38893195 | C | 0.75 | 0.7857 | G |
| 10 | BICF2P201153            | 38912725 | T | 0.75 | 0.7857 | A |
| 10 | BICF2P1030862           | 38926325 | G | 0.75 | 0.7857 | A |
| 10 | BICF2P276528            | 38932670 | A | 0.5  | 0.5    | G |
| 10 | BICF2P1423566           | 38940452 | A | 0.75 | 0.7857 | C |
| 10 | BICF2S23037662          | 38974517 | 0 | 0    | 0      | G |
| 10 | BICF2P1015233           | 39004837 | G | 0.5  | 0.5    | A |
| 10 | TIGRP2P139250_rs8573464 | 39015928 | 0 | 0    | 0      | A |
| 10 | BICF2P5886              | 39020983 | A | 0    | 0      | G |
| 10 | BICF2P998895            | 39034021 | G | 1    | 1      | A |
| 10 | BICF2S23035215          | 39049802 | G | 0.5  | 0.5    | A |
| 10 | BICF2P679919            | 39054709 | G | 1    | 1      | A |
| 10 | BICF2P452541            | 39066689 | A | 0    | 0.2143 | G |
| 10 | BICF2P1165311           | 39080280 | A | 0    | 0      | G |
| 10 | BICF2P806038            | 39092265 | 0 | 0    | 0      | A |
| 10 | BICF2P879518            | 39109056 | A | 0    | 0      | T |
| 10 | BICF2P646200            | 39111891 | 0 | 0    | 0      | A |
| 10 | BICF2S2379147           | 39139431 | A | 0.25 | 0.2143 | G |
| 10 | BICF2P132436            | 39156349 | A | 0.75 | 0.7143 | G |
| 10 | BICF2P242655            | 39158620 | A | 0.5  | 0.4286 | G |
| 10 | BICF2P203790            | 39170781 | G | 0.75 | 0.7143 | A |
| 10 | TIGRP2P139254_rs8621736 | 39189073 | 0 | 0    | 0      | A |
| 10 | BICF2S23758989          | 39202650 | A | 0    | 0      | G |
| 10 | BICF2P675419            | 39209627 | 0 | 0    | 0      | G |

|    |                         |          |   |      |        |   |
|----|-------------------------|----------|---|------|--------|---|
| 10 | BICF2S23327479          | 39211422 | A | 0    | 0      | G |
| 10 | BICF2P762723            | 39215389 | A | 0.25 | 0.2143 | G |
| 10 | BICF2P586564            | 39233694 | G | 0.75 | 0.7143 | A |
| 10 | BICF2P1410286           | 39240626 | A | 0.75 | 0.7143 | G |
| 10 | BICF2S23244019          | 39250606 | 0 | 0    | 0      | G |
| 10 | BICF2S2353527           | 39264825 | G | 0    | 0      | A |
| 10 | BICF2S23547220          | 39275393 | C | 0.75 | 0.7857 | A |
| 10 | BICF2P1230023           | 39297941 | 0 | 0    | 0      | G |
| 10 | BICF2P112768            | 39307473 | G | 0.5  | 0.5    | A |
| 10 | TIGRP2P139257_rs8958236 | 39321634 | 0 | 0    | 0      | A |
| 10 | TIGRP2P139258_rs8644196 | 39333127 | 0 | 0    | 0      | G |
| 10 | G597f45S25              | 39357064 | 0 | 0    | 0      | C |
| 10 | BICF2S23531659          | 39384638 | A | 0    | 0      | G |
| 10 | BICF2P697825            | 39402706 | G | 0.5  | 0.5    | A |
| 10 | BICF2P240158            | 39414760 | 0 | 0    | 0      | A |
| 10 | BICF2P1092538           | 39446216 | G | 0.5  | 0.5    | A |
| 10 | BICF2P1318151           | 39464685 | G | 0.5  | 0.5    | A |
| 10 | BICF2P971898            | 39472600 | A | 0.5  | 0.5    | G |
| 10 | BICF2P762453            | 39479839 | A | 0.5  | 0.5    | G |
| 10 | BICF2P482825            | 39499305 | A | 0.75 | 0.7857 | G |
| 10 | BICF2P1418691           | 39503251 | G | 0.5  | 0.5    | A |
| 10 | BICF2P474746            | 39516025 | A | 0.5  | 0.5    | G |
| 10 | BICF2P1211090           | 39535053 | G | 0.5  | 0.5    | A |
| 10 | BICF2P1192904           | 39538389 | C | 0    | 0      | G |
| 10 | BICF2P1333410           | 39539071 | G | 0.5  | 0.5    | A |
| 10 | BICF2S23331156          | 39561079 | C | 0.75 | 0.7143 | A |
| 10 | BICF2S23331155          | 39561108 | A | 0.75 | 0.7143 | C |
| 10 | BICF2P541381            | 39564789 | G | 0.75 | 0.7857 | A |
| 10 | BICF2P608090            | 39621228 | A | 0.25 | 0.2143 | C |
| 10 | BICF2P438721            | 39627024 | A | 0    | 0      | G |
| 10 | BICF2S23532407          | 39631709 | G | 0.25 | 0.2143 | A |
| 10 | G598f14S99              | 39659863 | A | 0.75 | 0.7857 | G |
| 10 | BICF2S23913669          | 39664974 | T | 0.75 | 0.7857 | A |
| 10 | BICF2P1332823           | 39685477 | 0 | 0    | 0      | C |
| 10 | BICF2P584384            | 39697379 | A | 0    | 0      | C |
| 10 | BICF2P584383            | 39698732 | 0 | 0    | 0      | A |
| 10 | BICF2S24415854          | 39756079 | A | 0.75 | 0.8333 | G |
| 10 | BICF2S23612256          | 39768855 | G | 0.75 | 0.7857 | A |
| 10 | BICF2P1295510           | 39779228 | 0 | 0    | 0      | A |
| 10 | BICF2P1163832           | 39791660 | G | 0.75 | 0.7857 | A |
| 10 | BICF2S23144149          | 39814392 | A | 0    | 0      | G |
| 10 | BICF2P1400778           | 39826155 | A | 0    | 0      | C |
| 10 | BICF2S2308374           | 39836839 | A | 0.5  | 0.5    | G |
| 10 | BICF2P171223            | 39850356 | A | 0.25 | 0.2857 | G |
| 10 | BICF2S23720259          | 39861289 | T | 0    | 0      | A |
| 10 | BICF2P1123078           | 39871680 | G | 0.5  | 0.5    | A |
| 10 | BICF2P493654            | 39886776 | G | 0.5  | 0.5    | A |

|    |                |          |   |      |        |   |
|----|----------------|----------|---|------|--------|---|
| 10 | BICF2P1165238  | 39894054 | G | 0.5  | 0.5    | A |
| 10 | BICF2S23636873 | 39926531 | 0 | 0    | 0      | G |
| 10 | BICF2P493862   | 39928680 | G | 0.5  | 0.5    | A |
| 10 | BICF2P155531   | 39940255 | G | 0.5  | 0.5    | A |
| 10 | BICF2P115855   | 39959669 | A | 0.5  | 0.5    | G |
| 10 | BICF2S23516482 | 39964845 | A | 0.5  | 0.5    | G |
| 10 | BICF2P1001877  | 39980538 | A | 0.5  | 0.5    | G |
| 10 | BICF2P1391629  | 39987136 | G | 0.5  | 0.5    | A |
| 10 | BICF2P651358   | 40028984 | G | 0.5  | 0.5    | A |
| 10 | BICF2P67903    | 40036990 | C | 0    | 0      | A |
| 10 | BICF2S23646068 | 40054208 | C | 0.75 | 0.7143 | A |
| 10 | BICF2S235950   | 40055403 | G | 0.75 | 0.7143 | A |
| 10 | BICF2S23314483 | 40069982 | A | 0.5  | 0.5    | G |
| 10 | BICF2S23532899 | 40096229 | G | 0.25 | 0.2143 | A |
| 10 | BICF2S23034702 | 40107135 | A | 0    | 0      | G |
| 10 | BICF2P1309037  | 40120294 | 0 | 0    | 0      | G |
| 10 | BICF2P877803   | 40127484 | A | 0.25 | 0.2857 | G |
| 10 | BICF2P977782   | 40135983 | C | 0    | 0      | A |
| 10 | BICF2P953599   | 40148271 | G | 0    | 0      | A |
| 10 | BICF2P158638   | 40173832 | G | 0.25 | 0.2143 | A |
| 10 | BICF2P1144761  | 40182227 | A | 0    | 0      | G |
| 10 | BICF2P1081558  | 40196030 | A | 0    | 0      | G |
| 10 | BICF2S23637559 | 40205095 | A | 0.75 | 0.7143 | G |
| 10 | BICF2S23021735 | 40226244 | G | 0    | 0      | A |
| 10 | BICF2P53099    | 40233562 | A | 0.5  | 0.5    | G |
| 10 | BICF2P648792   | 40241992 | G | 0    | 0      | A |
| 10 | BICF2P316980   | 40250825 | G | 0    | 0      | A |
| 10 | BICF2P949491   | 40252453 | A | 0.25 | 0.1667 | C |
| 10 | BICF2P455217   | 40261786 | A | 0    | 0      | G |
| 10 | BICF2P753822   | 40284316 | A | 1    | 1      | G |
| 10 | BICF2S2376126  | 40293391 | G | 0.25 | 0.2143 | A |
| 10 | BICF2P277947   | 40300716 | G | 0.75 | 0.7857 | A |
| 10 | BICF2P399349   | 40317495 | A | 0    | 0      | G |
| 10 | BICF2P1196416  | 40330047 | C | 0    | 0      | A |
| 10 | BICF2P539231   | 40332760 | A | 0    | 0      | G |
| 10 | BICF2P334890   | 40348826 | G | 0    | 0      | A |
| 10 | BICF2P490200   | 40362602 | G | 0    | 0      | A |
| 10 | BICF2P1033785  | 40378190 | G | 0    | 0      | A |
| 10 | BICF2S234558   | 40381822 | C | 0    | 0      | A |
| 10 | BICF2P411307   | 40391968 | G | 0    | 0      | A |
| 10 | BICF2S23520134 | 40405692 | A | 0.5  | 0.5    | G |
| 10 | BICF2S23416045 | 40418321 | A | 0    | 0      | G |
| 10 | BICF2P553041   | 40431178 | G | 0.25 | 0.2857 | A |
| 10 | BICF2P755454   | 40443972 | G | 1    | 1      | A |
| 10 | BICF2S23231161 | 40448172 | G | 1    | 1      | C |
| 10 | BICF2P1085572  | 40462235 | A | 1    | 1      | G |
| 10 | BICF2P1234996  | 40469119 | 0 | 0    | 0      | A |



|    |                 |          |   |      |        |   |
|----|-----------------|----------|---|------|--------|---|
| 10 | BICF2P335737    | 40482362 | A | 0    | 0      | C |
| 10 | BICF2P288281    | 40499654 | G | 0    | 0      | A |
| 10 | BICF2P124797    | 40503251 | G | 0    | 0      | A |
| 10 | BICF2P1122712   | 40522994 | A | 0    | 0      | G |
| 10 | BICF2P749529    | 40526205 | G | 0.25 | 0.2857 | A |
| 10 | BICF2P994038    | 40528000 | G | 0.25 | 0.2857 | C |
| 10 | BICF2P809771    | 40548689 | G | 0.5  | 0.5    | A |
| 10 | BICF2P284753    | 40553335 | A | 0    | 0      | C |
| 10 | BICF2S23239448  | 40570875 | C | 0.25 | 0.2857 | A |
| 10 | BICF2P657631    | 40578559 | A | 0    | 0      | G |
| 10 | BICF2P528896    | 40589268 | G | 0.25 | 0.2143 | A |
| 10 | BICF2P439279    | 40615900 | G | 0    | 0      | A |
| 10 | BICF2P1336929   | 40624271 | C | 0    | 0      | A |
| 10 | BICF2P981498    | 40643088 | A | 0.5  | 0.5    | G |
| 10 | BICF2P680482    | 40663239 | C | 0    | 0      | G |
| 10 | BICF2P44428     | 40668862 | G | 0    | 0      | A |
| 10 | BICF2P721822    | 40678528 | C | 0.5  | 0.5    | G |
| 10 | BICF2P747092    | 40693573 | G | 0.5  | 0.5    | A |
| 10 | BICF2G630486234 | 40709654 | A | 0.5  | 0.5    | G |
| 10 | BICF2G630486243 | 40719396 | A | 0.5  | 0.5    | G |
| 10 | BICF2P785828    | 40721965 | G | 0.5  | 0.5    | A |
| 10 | BICF2P1251880   | 40746976 | G | 0.5  | 0.5    | A |
| 10 | BICF2P976837    | 40764963 | A | 0.5  | 0.5    | G |
| 10 | BICF2G630486258 | 40769299 | A | 0.5  | 0.5    | G |
| 10 | BICF2G630486281 | 40783687 | A | 0.5  | 0.5    | G |
| 10 | BICF2G630486311 | 40795060 | C | 0.5  | 0.5    | A |
| 10 | BICF2G630486323 | 40801773 | A | 0.5  | 0.5    | C |
| 10 | BICF2G630486325 | 40803942 | A | 0.75 | 0.7857 | G |
| 10 | BICF2G630486328 | 40807823 | G | 0.25 | 0.2143 | A |
| 10 | BICF2G630486332 | 40823185 | G | 0.25 | 0.2857 | A |
| 10 | BICF2G630486335 | 40834409 | A | 0    | 0      | G |
| 10 | BICF2G630486337 | 40837645 | A | 0    | 0      | G |
| 10 | BICF2G630486360 | 40858466 | G | 0.25 | 0.2857 | A |
| 10 | BICF2G630486386 | 40870911 | C | 0.25 | 0.2857 | A |
| 10 | BICF2G630486388 | 40872298 | C | 0    | 0      | A |
| 10 | BICF2G630486407 | 40884706 | A | 0    | 0      | G |
| 10 | BICF2G630486415 | 40897092 | A | 0    | 0      | G |
| 10 | BICF2G630486457 | 40912675 | G | 0.25 | 0.2143 | A |
| 10 | BICF2P1242755   | 40918256 | C | 0.75 | 0.7857 | A |
| 10 | BICF2P266904    | 40922793 | A | 0.5  | 0.5    | G |
| 10 | BICF2G630486468 | 40938268 | 0 | 0    | 0      | G |
| 10 | BICF2P1250824   | 40942742 | G | 0.75 | 0.7857 | A |
| 10 | BICF2P1206027   | 40951573 | A | 0.75 | 0.7857 | G |
| 10 | BICF2P1017262   | 40963594 | A | 0.75 | 0.7857 | G |
| 10 | BICF2G630486514 | 40983876 | G | 0.5  | 0.5    | A |
| 10 | BICF2G630486518 | 40996630 | C | 0.5  | 0.5    | A |
| 10 | BICF2G630486519 | 41004933 | 0 | 0    | 0      | G |

|    |                         |          |   |      |        |   |
|----|-------------------------|----------|---|------|--------|---|
| 10 | BICF2G630486537         | 41010330 | A | 0    | 0      | G |
| 10 | BICF2P534789            | 41020537 | 0 | 0    | 0      | A |
| 10 | BICF2G630486552         | 41050419 | A | 0.25 | 0.25   | G |
| 10 | BICF2G630486584         | 41069760 | G | 0.25 | 0.2857 | A |
| 10 | BICF2G630486595         | 41078220 | A | 0.25 | 0.2857 | G |
| 10 | BICF2G630486613         | 41091174 | C | 0.5  | 0.5    | A |
| 10 | BICF2G630486618         | 41102099 | A | 0.5  | 0.5    | G |
| 10 | BICF2G630486642         | 41118734 | G | 0.5  | 0.5    | A |
| 10 | BICF2G630486664         | 41134702 | G | 0.25 | 0.2    | A |
| 10 | BICF2P278325            | 41135571 | A | 0.25 | 0.2857 | C |
| 10 | BICF2S2327113           | 41148764 | G | 0.25 | 0.2143 | A |
| 10 | BICF2G630486685         | 41169424 | A | 0.75 | 0.7143 | G |
| 10 | BICF2P1196668           | 41175122 | A | 0    | 0      | C |
| 10 | BICF2G630486726         | 41189782 | G | 0    | 0      | A |
| 10 | BICF2G630486752         | 41194625 | A | 0    | 0      | G |
| 10 | BICF2G630486786         | 41205411 | A | 0.25 | 0.2143 | G |
| 10 | BICF2G630486807         | 41217714 | G | 0    | 0.2143 | A |
| 10 | BICF2P759245            | 41235650 | G | 0.75 | 0.7857 | A |
| 10 | BICF2G630486827         | 41241214 | G | 0.75 | 0.7857 | A |
| 10 | BICF2P315296            | 41262433 | 0 | 0    | 0      | A |
| 10 | BICF2G630486842         | 41274006 | G | 0.75 | 0.7143 | A |
| 10 | BICF2G630486859         | 41287603 | A | 0.75 | 0.7143 | G |
| 10 | BICF2G630486902         | 41304517 | A | 1    | 1      | G |
| 10 | BICF2G630486931         | 41314853 | G | 0    | 0      | A |
| 10 | BICF2S23150428          | 41315878 | A | 0    | 0      | G |
| 10 | BICF2G630486932         | 41316282 | C | 0    | 0      | G |
| 10 | TIGRP2P139292_rs8645545 | 41320981 | 0 | 0    | 0      | A |
| 10 | BICF2S23036712          | 41334486 | C | 0.25 | 0.2857 | A |
| 10 | BICF2G630486981         | 41349536 | A | 0    | 0      | G |
| 10 | BICF2G630486989         | 41355323 | 0 | 0    | 0      | G |
| 10 | BICF2S2452880           | 41368598 | A | 0    | 0      | G |
| 10 | BICF2G630487001         | 41382537 | G | 0.25 | 0.2143 | A |
| 10 | BICF2G630487027         | 41391590 | A | 0.25 | 0.2143 | C |
| 10 | BICF2S23534231          | 41403191 | G | 0.25 | 0.2143 | A |
| 10 | BICF2G630487060         | 41413756 | A | 0    | 0      | G |
| 10 | BICF2G630487086         | 41423627 | G | 0.5  | 0.5    | A |
| 10 | BICF2P1056358           | 41445578 | G | 0    | 0      | A |
| 10 | BICF2G630487110         | 41448783 | G | 0.25 | 0.2143 | C |
| 10 | BICF2G630487114         | 41458367 | A | 0.25 | 0.2143 | G |
| 10 | BICF2G630487131         | 41479701 | T | 0.25 | 0.2143 | A |
| 10 | BICF2P350599            | 41488778 | A | 0    | 0      | G |
| 10 | BICF2G630487152         | 41498001 | A | 0.5  | 0.5    | G |
| 10 | BICF2G630487168         | 41509962 | C | 0.25 | 0.2143 | A |
| 10 | BICF2G630487186         | 41524201 | G | 0.5  | 0.5    | A |
| 10 | BICF2S2313417           | 41534976 | A | 0    | 0      | C |
| 10 | BICF2S23445002          | 41554369 | G | 1    | 1      | A |
| 10 | BICF2G630487209         | 41563084 | C | 0.25 | 0.2143 | A |

|    |                 |          |   |      |        |   |
|----|-----------------|----------|---|------|--------|---|
| 10 | BICF2G630487234 | 41574056 | A | 0.5  | 0.5    | G |
| 10 | BICF2G630487265 | 41585138 | G | 0.25 | 0.2143 | A |
| 10 | BICF2G630487276 | 41595813 | C | 0.5  | 0.5    | A |
| 10 | BICF2G630487303 | 41612062 | G | 0.25 | 0.2857 | A |
| 10 | BICF2G630487308 | 41616437 | A | 0    | 0      | G |
| 10 | BICF2S23640227  | 41622898 | C | 0.5  | 0.5    | A |
| 10 | BICF2P1038271   | 41632884 | A | 0.5  | 0.5    | G |
| 10 | BICF2S23630352  | 41646068 | G | 0    | 0      | A |
| 10 | BICF2G630487316 | 41655003 | G | 0.25 | 0.2143 | A |
| 10 | BICF2G630487329 | 41672851 | G | 0.25 | 0.2143 | A |
| 10 | BICF2G630487354 | 41700858 | G | 0.5  | 0.5    | A |
| 10 | BICF2G630487365 | 41710557 | A | 0.25 | 0.2143 | G |
| 10 | BICF2S23537585  | 41723154 | A | 0    | 0      | G |
| 10 | BICF2G630487409 | 41739604 | G | 0    | 0      | A |
| 10 | BICF2G630487416 | 41743616 | A | 1    | 1      | G |
| 10 | BICF2G630487418 | 41748482 | A | 0.75 | 0.7857 | G |
| 10 | BICF2G630487423 | 41760905 | G | 0.75 | 0.7857 | A |
| 10 | BICF2G630487458 | 41771467 | A | 0.5  | 0.5    | G |
| 10 | BICF2S23710954  | 41781328 | A | 0.5  | 0.5    | G |
| 10 | BICF2G630487463 | 41794835 | G | 0.75 | 0.7143 | A |
| 10 | BICF2G630487492 | 41813783 | G | 1    | 0.7857 | A |
| 10 | BICF2G630487514 | 41827080 | A | 0    | 0      | G |
| 10 | BICF2G630487523 | 41843692 | A | 0    | 0      | G |
| 10 | BICF2G630487543 | 41858027 | A | 1    | 1      | G |
| 10 | BICF2P951190    | 41870230 | G | 1    | 1      | A |
| 10 | BICF2P770348    | 41876193 | G | 0    | 0      | A |
| 10 | BICF2S23713363  | 41889811 | A | 0    | 0      | G |
| 10 | BICF2G630487551 | 41902162 | A | 1    | 1      | G |
| 10 | BICF2G630487560 | 41906821 | A | 1    | 1      | G |
| 10 | BICF2G630487609 | 41920424 | A | 0    | 0      | G |
| 10 | BICF2G630487626 | 41935370 | A | 0    | 0      | G |
| 10 | BICF2G630487650 | 41945115 | A | 0    | 0      | C |
| 10 | BICF2G630487656 | 41956497 | A | 0    | 0      | G |
| 10 | BICF2G630487668 | 41972539 | A | 0    | 0      | G |
| 10 | BICF2G630487671 | 41977602 | A | 0    | 0      | G |
| 10 | BICF2G630487684 | 41987215 | 0 | 0    | 0      | G |
| 10 | BICF2G630487686 | 42004838 | G | 0    | 0      | A |
| 10 | BICF2G630487692 | 42012571 | G | 0    | 0      | A |
| 10 | BICF2P71818     | 42032076 | G | 0    | 0      | A |
| 10 | BICF2G630487706 | 42034048 | A | 0    | 0      | G |
| 10 | BICF2G630487719 | 42046052 | A | 0    | 0      | G |
| 10 | BICF2G630487725 | 42060335 | A | 0    | 0      | G |
| 10 | BICF2G630487753 | 42075134 | G | 0.75 | 0.7857 | A |
| 10 | BICF2G630487760 | 42080058 | C | 0    | 0      | A |
| 10 | BICF2P1313444   | 42095524 | A | 0.25 | 0.2143 | G |
| 10 | BICF2G630487802 | 42095657 | G | 0    | 0      | A |
| 10 | BICF2G630487816 | 42103909 | A | 0    | 0      | G |

|    |                 |          |   |      |        |   |
|----|-----------------|----------|---|------|--------|---|
| 10 | BICF2G630487819 | 42104976 | C | 0.75 | 0.8333 | A |
| 10 | BICF2P556763    | 42121675 | A | 0.5  | 0.5    | G |
| 10 | BICF2G630487838 | 42128012 | C | 0.25 | 0.2143 | A |
| 10 | BICF2G630487870 | 42138655 | G | 0    | 0      | A |
| 10 | BICF2G630487873 | 42144645 | A | 0    | 0      | G |
| 10 | BICF2G630487881 | 42147529 | C | 0    | 0      | A |
| 10 | BICF2G630487914 | 42162747 | C | 0    | 0      | A |
| 10 | BICF2P290114    | 42176459 | G | 1    | 1      | A |
| 10 | BICF2G630487951 | 42187969 | A | 0    | 0      | T |
| 10 | BICF2P97279     | 42193068 | C | 0    | 0      | A |
| 10 | BICF2G630487956 | 42193330 | A | 0    | 0      | G |
| 10 | BICF2S23762350  | 42194691 | G | 0    | 0      | A |
| 10 | BICF2G630487971 | 42207366 | A | 0.75 | 0.7857 | G |
| 10 | BICF2P980691    | 42217595 | G | 0    | 0      | A |
| 10 | BICF2S23251491  | 42230146 | A | 0    | 0      | C |
| 10 | BICF2G630487984 | 42257296 | A | 0.25 | 0.2857 | G |
| 10 | BICF2G630488002 | 42269506 | G | 0    | 0      | A |
| 10 | BICF2G630488020 | 42275984 | A | 0    | 0      | G |
| 10 | BICF2P1381759   | 42288759 | G | 0.25 | 0.2857 | A |
| 10 | BICF2G630488053 | 42307807 | 0 | 0    | 0      | A |
| 10 | BICF2G630488063 | 42311266 | 0 | 0    | 0      | A |
| 10 | BICF2G630488077 | 42327531 | G | 0    | 0      | A |
| 10 | BICF2G630488100 | 42340854 | A | 0    | 0      | G |
| 10 | BICF2S23317551  | 42343179 | G | 0    | 0      | A |
| 10 | BICF2P1201124   | 42360745 | G | 0    | 0      | A |
| 10 | BICF2P657241    | 42366072 | A | 0.75 | 0.7857 | G |
| 10 | BICF2P501801    | 42377786 | A | 1    | 1      | C |
| 10 | BICF2P696493    | 42399133 | G | 0.5  | 0.5    | A |
| 10 | BICF2G630488122 | 42405207 | A | 0    | 0      | G |
| 10 | BICF2P534596    | 42419656 | G | 0    | 0      | A |
| 10 | BICF2P207352    | 42424398 | G | 0    | 0      | A |
| 10 | BICF2G630488130 | 42445958 | G | 0    | 0      | A |
| 10 | BICF2G630488132 | 42448422 | G | 0    | 0      | A |
| 10 | BICF2S23032313  | 42458010 | C | 0    | 0      | A |
| 10 | BICF2G630488149 | 42477947 | G | 0.5  | 0.5    | A |
| 10 | BICF2G630488155 | 42483781 | G | 0.75 | 0.7143 | A |
| 10 | BICF2G630488168 | 42499215 | A | 0    | 0      | G |
| 10 | BICF2G630488177 | 42504590 | G | 0    | 0      | A |
| 10 | BICF2G630488189 | 42516459 | G | 0    | 0      | A |
| 10 | BICF2P256103    | 42535916 | G | 0.5  | 0.5    | A |
| 10 | BICF2P1039179   | 42538568 | A | 0.5  | 0.5    | C |
| 10 | BICF2P1046961   | 42574502 | A | 0.25 | 0.2857 | T |
| 10 | BICF2P465094    | 42585302 | A | 0.25 | 0.2857 | G |
| 10 | BICF2G630488196 | 42597561 | G | 0.25 | 0.2143 | A |
| 10 | BICF2P1139678   | 42608803 | A | 0.5  | 0.5    | G |
| 10 | BICF2G630488207 | 42619343 | A | 0.25 | 0.2857 | G |
| 10 | BICF2G630488228 | 42633438 | G | 0    | 0      | A |

|    |                         |          |   |      |        |   |
|----|-------------------------|----------|---|------|--------|---|
| 10 | BICF2G630488242         | 42642755 | G | 0.5  | 0.5    | A |
| 10 | BICF2G630488256         | 42660173 | A | 0    | 0      | G |
| 10 | BICF2G630488267         | 42670586 | G | 1    | 1      | A |
| 10 | BICF2G630488287         | 42688707 | G | 1    | 1      | A |
| 10 | BICF2G630488316         | 42701533 | A | 1    | 1      | T |
| 10 | BICF2G630488324         | 42719319 | A | 0    | 0      | C |
| 10 | BICF2P26604             | 42724040 | G | 0.75 | 0.7143 | C |
| 10 | BICF2S23656498          | 42743628 | A | 0    | 0      | G |
| 10 | TIGRP2P139348_rs8838088 | 42745856 | 0 | 0    | 0      | A |
| 10 | BICF2S23344938          | 42762105 | G | 0.25 | 0.2857 | A |
| 10 | BICF2P1071570           | 42768655 | 0 | 0    | 0      | A |
| 10 | BICF2P1437716           | 42786589 | C | 0.5  | 0.5    | G |
| 10 | BICF2G630488333         | 42800192 | G | 0    | 0      | A |
| 10 | BICF2G630488363         | 42809479 | G | 0.5  | 0.5    | A |
| 10 | BICF2G630488396         | 42820509 | A | 0.5  | 0.5    | T |
| 10 | BICF2G630488427         | 42842254 | A | 0.25 | 0.2857 | G |
| 10 | BICF2P487007            | 42855331 | A | 0.5  | 0.5    | G |
| 10 | BICF2S23154094          | 42861305 | G | 0.5  | 0.5    | A |
| 10 | BICF2G630488445         | 42875580 | A | 0.25 | 0.2857 | G |
| 10 | BICF2G630488488         | 42892313 | A | 0.25 | 0.2857 | G |
| 10 | TIGRP2P139406_rs8837845 | 42901314 | A | 0.25 | 0.2857 | G |
| 10 | BICF2G630488498         | 42914491 | A | 0    | 0      | G |
| 10 | BICF2G630488547         | 42936059 | A | 0.25 | 0.2143 | G |
| 10 | BICF2G630488558         | 42946371 | C | 0.5  | 0.5    | A |
| 10 | BICF2G630488572         | 42960780 | A | 0.25 | 0.2143 | G |
| 10 | BICF2G630488585         | 42973724 | 0 | 0    | 0      | G |
| 10 | BICF2G630488587         | 42976090 | G | 0.25 | 0.2143 | A |
| 10 | BICF2G630488596         | 42992307 | A | 0    | 0      | G |
| 10 | BICF2G630488599         | 43001543 | A | 0.25 | 0.2143 | C |
| 10 | BICF2G630488610         | 43010007 | A | 0    | 0      | G |
| 10 | BICF2G630488624         | 43026483 | A | 0.75 | 0.7143 | G |
| 10 | TIGRP2P139421_rs8765949 | 43033813 | G | 0.75 | 0.7143 | A |
| 10 | BICF2G630488651         | 43058076 | G | 0.75 | 0.7143 | A |
| 10 | BICF2P1464923           | 43072409 | A | 0.25 | 0.2857 | G |
| 10 | BICF2G630488675         | 43081325 | A | 0    | 0      | G |
| 10 | BICF2G630488685         | 43086455 | A | 0    | 0      | G |
| 10 | BICF2G630488699         | 43101695 | A | 0    | 0      | C |
| 10 | BICF2S23125191          | 43111855 | A | 0.75 | 0.7143 | G |
| 10 | TIGRP2P139438_rs8700438 | 43115081 | A | 0.75 | 0.7143 | G |
| 10 | BICF2P838661            | 43131052 | A | 0.5  | 0.5    | G |
| 10 | BICF2P355650            | 43139339 | A | 0.5  | 0.5    | C |
| 10 | BICF2G630488721         | 43164610 | G | 0.25 | 0.2857 | A |
| 10 | BICF2P1063186           | 43171556 | A | 0.5  | 0.5    | T |
| 10 | BICF2S23142951          | 43186188 | A | 0.5  | 0.5    | G |
| 10 | TIGRP2P139476_rs8608933 | 43197179 | G | 0.5  | 0.5    | A |
| 10 | BICF2G630488729         | 43213813 | C | 0.5  | 0.5    | G |
| 10 | BICF2G630488736         | 43217122 | A | 0    | 0      | G |

|    |                         |          |   |      |        |   |
|----|-------------------------|----------|---|------|--------|---|
| 10 | BICF2G630488751         | 43236140 | G | 0.5  | 0.5    | A |
| 10 | BICF2P621985            | 43250702 | A | 0.5  | 0.5    | G |
| 10 | BICF2G630488756         | 43251656 | A | 0.75 | 0.7143 | G |
| 10 | BICF2G630488773         | 43264862 | G | 0    | 0      | A |
| 10 | BICF2G630488774         | 43264881 | G | 0    | 0      | A |
| 10 | BICF2P578227            | 43275298 | G | 0    | 0      | A |
| 10 | BICF2P1380227           | 43283630 | A | 0.5  | 0.5    | G |
| 10 | BICF2P811103            | 43292033 | A | 0    | 0      | G |
| 10 | BICF2G630488815         | 43304460 | A | 0.75 | 0.7143 | G |
| 10 | TIGRP2P139516_rs8946217 | 43309606 | A | 0.25 | 0.2143 | G |
| 10 | BICF2G630488880         | 43329282 | G | 0    | 0      | A |
| 10 | BICF2S2306463           | 43332534 | A | 0    | 0      | G |
| 10 | BICF2G630488907         | 43351052 | G | 0    | 0      | A |
| 10 | BICF2G630488915         | 43355087 | G | 0    | 0      | A |
| 10 | BICF2G630488926         | 43370347 | A | 0.75 | 0.7857 | G |
| 10 | BICF2P513762            | 43376946 | A | 0.25 | 0.2143 | C |
| 10 | BICF2G630488941         | 43378636 | G | 0    | 0      | A |
| 10 | BICF2G630488966         | 43397991 | G | 0    | 0      | A |
| 10 | BICF2P640829            | 43406486 | G | 0.25 | 0.2143 | A |
| 10 | TIGRP2P139536_rs8906929 | 43413233 | A | 0.25 | 0.2143 | C |
| 10 | BICF2P1436499           | 43440766 | G | 0.25 | 0.2143 | A |
| 10 | BICF2P606850            | 43447427 | G | 0.25 | 0.1667 | A |
| 10 | BICF2G630489020         | 43464010 | A | 0    | 0      | G |
| 10 | BICF2P1192070           | 43471863 | G | 0.25 | 0.2143 | A |
| 10 | TIGRP2P139550_rs8583806 | 43482931 | C | 0.25 | 0.2143 | G |
| 10 | BICF2P1073900           | 43498330 | A | 0.25 | 0.2143 | G |
| 10 | BICF2P504478            | 43505277 | C | 0.25 | 0.2143 | A |
| 10 | TIGRP2P139560_rs9061560 | 43511921 | A | 1    | 1      | G |
| 10 | BICF2P145412            | 43520457 | 0 | 0    | 0      | G |
| 10 | BICF2P853585            | 43537884 | A | 0    | 0      | G |
| 10 | BICF2P939876            | 43541219 | G | 0    | 0.2143 | A |
| 10 | BICF2P525121            | 43557747 | G | 0    | 0.2143 | A |
| 10 | BICF2G630489040         | 43565519 | A | 0    | 0      | G |
| 10 | BICF2G630489041         | 43565551 | C | 0    | 0      | A |
| 10 | BICF2P45549             | 43578888 | G | 0    | 0      | A |
| 10 | BICF2G630489072         | 43586023 | G | 0    | 0      | A |
| 10 | BICF2G630489091         | 43599116 | A | 1    | 0.7857 | G |
| 10 | BICF2G630489102         | 43608598 | G | 0    | 0      | A |
| 10 | BICF2G630489134         | 43628071 | G | 0    | 0      | A |
| 10 | BICF2G630489146         | 43631913 | A | 0    | 0      | G |
| 10 | BICF2G630489160         | 43648675 | A | 1    | 0.7857 | G |
| 10 | BICF2G630489163         | 43654414 | A | 0    | 0      | C |
| 10 | BICF2G630489164         | 43666516 | A | 1    | 0.7857 | G |
| 10 | BICF2S23430322          | 43710058 | G | 0    | 0      | A |
| 10 | BICF2S2326696           | 43764481 | A | 0    | 0      | G |
| 10 | BICF2G630489186         | 43772450 | A | 0.5  | 0.5    | G |
| 10 | BICF2S23439828          | 43788543 | G | 0    | 0      | A |

|    |                         |          |   |     |        |   |
|----|-------------------------|----------|---|-----|--------|---|
| 10 | BICF2P1461473           | 43799631 | 0 | 0   | 0      | T |
| 10 | BICF2S23049060          | 43804231 | G | 0   | 0      | A |
| 10 | BICF2S23437528          | 43818085 | A | 0   | 0      | G |
| 10 | BICF2S2361940           | 43883008 | A | 0.5 | 0.5    | G |
| 10 | BICF2S2361383           | 43887311 | G | 0   | 0      | A |
| 10 | BICF2S23624421          | 43907941 | A | 0   | 0      | G |
| 10 | BICF2S23431593          | 43941433 | G | 0.5 | 0.5    | A |
| 10 | BICF2S2343305           | 43946585 | A | 0.5 | 0.5    | G |
| 10 | BICF2G630489204         | 43974459 | A | 0.5 | 0.4167 | C |
| 10 | BICF2G630489205         | 43977659 | A | 0.5 | 0.5    | G |
| 10 | BICF2S22945324          | 43990510 | G | 0   | 0      | A |
| 10 | BICF2G630489215         | 44000702 | A | 0   | 0      | G |
| 10 | BICF2S2342675           | 44025503 | 0 | 0   | 0      | A |
| 10 | BICF2P1017693           | 44036519 | 0 | 0   | 0      | A |
| 10 | BICF2P1137656           | 44052513 | A | 0.5 | 0.5    | G |
| 10 | BICF2S2358325           | 44065828 | A | 0   | 0      | G |
| 10 | BICF2S2414384           | 44073077 | A | 0   | 0      | G |
| 10 | BICF2G630489227         | 44085137 | C | 0.5 | 0.5    | A |
| 10 | BICF2P765908            | 44091583 | A | 0.5 | 0.5    | G |
| 10 | BICF2G630489259         | 44111061 | G | 0   | 0      | A |
| 10 | BICF2G630489270         | 44118130 | A | 0   | 0.2143 | G |
| 10 | BICF2G630489282         | 44128145 | A | 0   | 0.2143 | G |
| 10 | BICF2G630489298         | 44138969 | G | 0   | 0.2143 | A |
| 10 | BICF2G630489335         | 44164207 | A | 0   | 0      | C |
| 10 | BICF2S2444832           | 44166499 | G | 0   | 0      | A |
| 10 | BICF2G630489356         | 44182803 | G | 0   | 0      | A |
| 10 | BICF2G630489358         | 44184206 | G | 0   | 0.2143 | A |
| 10 | BICF2G630489364         | 44201655 | G | 0   | 0      | A |
| 10 | TIGRP2P139652_rs8732220 | 44228690 | G | 0   | 0      | A |
| 10 | TIGRP2P139653_rs8542630 | 44232198 | 0 | 0   | 0      | A |
| 10 | BICF2P276951            | 44243684 | A | 0   | 0      | T |
| 10 | TIGRP2P139657_rs8578244 | 44255730 | A | 0   | 0      | G |
| 10 | TIGRP2P139659_rs8593112 | 44264087 | G | 0   | 0      | A |
| 10 | BICF2G630489373         | 44285234 | A | 0.5 | 0.5    | G |
| 10 | BICF2G630489378         | 44290193 | G | 0.5 | 0.5    | A |
| 10 | BICF2G630489384         | 44302212 | A | 0   | 0.2143 | G |
| 10 | TIGRP2P139666_rs8739623 | 44317016 | 0 | 0   | 0      | A |
| 10 | BICF2G630489393         | 44327168 | A | 0.5 | 0.5    | G |
| 10 | BICF2G630489395         | 44341615 | G | 0   | 0      | A |
| 10 | BICF2G630489396         | 44349474 | G | 0   | 0.2143 | A |
| 10 | BICF2G630489399         | 44355645 | A | 0   | 0      | G |
| 10 | BICF2G630489401         | 44368645 | A | 0   | 0      | G |
| 10 | BICF2P810265            | 44388352 | A | 0   | 0      | C |
| 10 | BICF2G630489408         | 44398279 | A | 0.5 | 0.5    | G |
| 10 | BICF2S22911059          | 44402496 | G | 0.5 | 0.5    | A |
| 10 | BICF2S2374545           | 44427894 | G | 0.5 | 0.2857 | A |
| 10 | BICF2S2298579           | 44439993 | A | 0   | 0.2143 | G |

|    |                         |          |   |     |        |   |
|----|-------------------------|----------|---|-----|--------|---|
| 10 | TIGRP2P139688_rs9049951 | 44448909 | A | 0.5 | 0.5    | G |
| 10 | TIGRP2P139697_rs9177090 | 44460451 | A | 0.5 | 0.5    | G |
| 10 | BICF2P1183622           | 44474127 | A | 0   | 0.2143 | G |
| 10 | BICF2S23059613          | 44499914 | A | 1   | 0.7857 | C |
| 10 | TIGRP2P139722_rs8888545 | 44523289 | A | 0   | 0.2143 | G |
| 10 | BICF2S23655231          | 44536897 | G | 0   | 0.2143 | A |
| 10 | BICF2P581061            | 44550732 | A | 0   | 0.2143 | G |
| 10 | BICF2P1377460           | 44561414 | G | 0.5 | 0.5    | A |
| 10 | BICF2P334949            | 44574658 | G | 0   | 0.2143 | A |
| 10 | TIGRP2P139737_rs9201446 | 44595080 | A | 0   | 0.2143 | C |
| 10 | BICF2S24414849          | 44602357 | 0 | 0   | 0      | G |
| 10 | BICF2P480840            | 44616856 | A | 0   | 0.2143 | C |
| 10 | BICF2P1333074           | 44627065 | A | 0   | 0.2143 | C |
| 10 | BICF2P1036734           | 44634142 | A | 1   | 0.7857 | G |
| 10 | BICF2S23724955          | 44644266 | A | 0   | 0      | G |
| 10 | BICF2P254286            | 44665280 | A | 0   | 0.2143 | G |
| 10 | BICF2P1424160           | 44669036 | 0 | 0   | 0      | G |
| 10 | BICF2S2449958           | 44717055 | G | 0.5 | 0.2857 | A |
| 10 | BICF2P1404240           | 44732290 | 0 | 0   | 0      | T |
| 10 | BICF2S23152821          | 44760475 | G | 0   | 0.1667 | A |
| 10 | BICF2P913643            | 44802054 | A | 0   | 0      | G |
| 10 | BICF2S22939332          | 44814574 | C | 0   | 0      | G |
| 10 | BICF2S2315074           | 44815554 | A | 0.5 | 0.5    | G |
| 10 | BICF2S23257139          | 44831771 | A | 0.5 | 0.5    | G |
| 10 | TIGRP2P139770_rs8714789 | 44861065 | A | 0.5 | 0.5    | G |
| 10 | TIGRP2P139772_rs9064513 | 44865134 | G | 0.5 | 0.5    | A |
| 10 | BICF2P765325            | 44873297 | G | 0.5 | 0.5    | A |
| 10 | BICF2P224361            | 44891997 | A | 0.5 | 0.5    | G |
| 10 | BICF2S23053174          | 44903609 | G | 0   | 0      | A |
| 10 | BICF2P843694            | 44915968 | G | 0   | 0      | A |
| 10 | TIGRP2P139789_rs8977415 | 44935714 | G | 1   | 1      | A |
| 10 | TIGRP2P139810_rs8974037 | 44952578 | A | 1   | 1      | G |
| 10 | BICF2P400957            | 44955958 | G | 1   | 1      | A |
| 10 | BICF2P214108            | 44972905 | G | 0   | 0      | A |
| 10 | TIGRP2P139821_rs8723298 | 44979138 | A | 0   | 0      | G |
| 10 | BICF2P605282            | 44997040 | A | 0   | 0      | G |
| 10 | BICF2P701358            | 45016763 | A | 0   | 0      | G |
| 10 | TIGRP2P139832_rs8979293 | 45019270 | A | 0   | 0      | G |
| 10 | BICF2P568243            | 45024878 | A | 0   | 0      | G |
| 10 | BICF2P585664            | 45036352 | C | 0   | 0      | A |
| 10 | BICF2P704927            | 45049375 | A | 0   | 0      | G |
| 10 | TIGRP2P139844_rs9240558 | 45064366 | A | 0   | 0      | G |
| 10 | BICF2P1301571           | 45078145 | A | 0   | 0      | G |
| 10 | BICF2P835369            | 45083267 | G | 0   | 0      | A |
| 10 | BICF2P1133346           | 45096357 | C | 0   | 0      | A |
| 10 | BICF2P562703            | 45102863 | G | 0   | 0      | A |
| 10 | BICF2P1223150           | 45105941 | G | 0   | 0      | A |



|    |                         |          |   |     |        |   |
|----|-------------------------|----------|---|-----|--------|---|
| 10 | BICF2S23647462          | 45117963 | T | 1   | 1      | A |
| 10 | BICF2P1243631           | 45135020 | G | 0   | 0      | A |
| 10 | BICF2P1243622           | 45137099 | T | 0   | 0      | A |
| 10 | BICF2P63884             | 45143831 | A | 1   | 1      | G |
| 10 | BICF2P933910            | 45149929 | A | 0   | 0      | G |
| 10 | BICF2S2449082           | 45176158 | G | 0   | 0.2143 | A |
| 10 | BICF2P181997            | 45184159 | G | 1   | 0.7857 | A |
| 10 | TIGRP2P139866_rs8736612 | 45210778 | A | 0   | 0      | G |
| 10 | BICF2P335557            | 45219705 | G | 1   | 0.7857 | A |
| 10 | BICF2S2343485           | 45230538 | A | 0   | 0.2143 | C |
| 10 | BICF2P1154868           | 45243460 | A | 1   | 0.7857 | G |
| 10 | BICF2P1379781           | 45256166 | G | 1   | 0.7857 | A |
| 10 | TIGRP2P139884_rs8991316 | 45271169 | G | 0   | 0      | A |
| 10 | BICF2P183346            | 45296138 | G | 0   | 0      | A |
| 10 | BICF2P522140            | 45318838 | A | 0   | 0      | G |
| 10 | BICF2P1234018           | 45325281 | G | 1   | 1      | A |
| 10 | BICF2S2325649           | 45327219 | G | 1   | 1      | A |
| 10 | BICF2P423149            | 45336273 | G | 0   | 0      | A |
| 10 | BICF2P423148            | 45337227 | G | 0   | 0      | A |
| 10 | BICF2S23252418          | 45348002 | A | 0   | 0      | C |
| 10 | BICF2P1023825           | 45365077 | A | 0   | 0      | G |
| 10 | BICF2P3733              | 45370356 | A | 0   | 0      | G |
| 10 | BICF2P1001809           | 45382452 | A | 1   | 1      | G |
| 10 | BICF2P1001810           | 45382527 | T | 0   | 0      | A |
| 10 | BICF2P1283185           | 45391299 | C | 0   | 0      | A |
| 10 | BICF2P712695            | 45403748 | A | 0   | 0      | G |
| 10 | BICF2P185678            | 45414962 | A | 0.5 | 0.7143 | G |
| 10 | BICF2P497520            | 45432592 | A | 1   | 1      | G |
| 10 | BICF2P391820            | 45438015 | G | 1   | 1      | A |
| 10 | BICF2P1214286           | 45461118 | G | 0.5 | 0.2857 | A |
| 10 | BICF2P102572            | 45503048 | G | 0.5 | 0.2857 | A |
| 10 | BICF2P433551            | 45516118 | C | 0.5 | 0.7143 | A |
| 10 | BICF2P468559            | 45519391 | 0 | 0   | 0      | A |
| 10 | BICF2P274981            | 45529021 | G | 0   | 0      | A |
| 10 | BICF2P950169            | 45547512 | G | 0.5 | 0.2857 | A |
| 10 | TIGRP2P139922_rs8698287 | 45558489 | G | 0.5 | 0.2857 | A |
| 10 | BICF2P1059934           | 45565736 | G | 0   | 0      | A |
| 10 | BICF2P969615            | 45589457 | A | 0   | 0      | G |
| 10 | BICF2P861550            | 45604813 | A | 0   | 0      | G |
| 10 | BICF2P960330            | 45611859 | 0 | 0   | 0      | C |
| 10 | BICF2P431058            | 45631037 | G | 0   | 0      | A |
| 10 | TIGRP2P139950_rs9072316 | 45632213 | 0 | 0   | 0      | A |
| 10 | BICF2P886693            | 45643689 | 0 | 0   | 0      | A |
| 10 | BICF2P1201228           | 45660146 | G | 0   | 0      | A |
| 10 | BICF2S24114004          | 45670337 | G | 0   | 0      | A |
| 10 | BICF2P1025931           | 45682635 | 0 | 0   | 0      | A |
| 10 | TIGRP2P139956_rs9068843 | 45690207 | 0 | 0   | 0      | G |

|    |                         |          |   |     |        |   |
|----|-------------------------|----------|---|-----|--------|---|
| 10 | BICF2P1368046           | 45705116 | 0 | 0   | 0      | A |
| 10 | BICF2P1189462           | 45720420 | A | 0.5 | 0.5    | G |
| 10 | BICF2P667480            | 45726040 | G | 0   | 0      | A |
| 10 | BICF2P450212            | 45736998 | G | 0.5 | 0.5    | A |
| 10 | BICF2P1332371           | 45749555 | C | 0   | 0      | A |
| 10 | BICF2S23510683          | 45760742 | C | 1   | 0.7857 | G |
| 10 | BICF2P1290796           | 45775969 | G | 0.5 | 0.5    | A |
| 10 | TIGRP2P139963_rs8692653 | 45790760 | A | 0   | 0      | G |
| 10 | BICF2P1169011           | 45790854 | A | 0.5 | 0.5    | G |
| 10 | BICF2S23013987          | 45800309 | G | 0   | 0      | A |
| 10 | BICF2S23013988          | 45800384 | A | 0   | 0      | G |
| 10 | BICF2P1415214           | 45806605 | A | 0   | 0      | G |
| 10 | BICF2P767733            | 45816029 | A | 0   | 0      | G |
| 10 | BICF2P1134152           | 45836042 | A | 0   | 0      | C |
| 10 | TIGRP2P139977_rs9008250 | 45845729 | G | 0   | 0      | A |
| 10 | TIGRP2P139978_rs8969291 | 45865615 | A | 0   | 0      | G |
| 10 | G601f49S234             | 45875098 | G | 0   | 0      | A |
| 10 | BICF2S23720057          | 45897329 | A | 0   | 0      | G |
| 10 | BICF2P493191            | 45911493 | 0 | 0   | 0      | C |
| 10 | BICF2S23040801          | 45925642 | C | 1   | 0.7857 | A |
| 10 | BICF2S2448757           | 45952674 | A | 0   | 0      | G |
| 10 | BICF2S23162594          | 45954997 | G | 0   | 0      | A |
| 10 | BICF2P953887            | 45973325 | C | 0.5 | 0.5    | A |
| 10 | BICF2P1137443           | 45980053 | G | 0.5 | 0.2857 | A |
| 10 | BICF2P1035869           | 45992727 | A | 0.5 | 0.5    | T |
| 10 | BICF2P746591            | 46009270 | 0 | 0   | 0      | A |
| 10 | BICF2S22917457          | 46018089 | A | 0   | 0      | G |
| 10 | BICF2P368233            | 46025909 | 0 | 0   | 0      | G |
| 10 | TIGRP2P139993_rs8611738 | 46053943 | A | 0   | 0      | G |
| 10 | BICF2S23728079          | 46068971 | A | 0   | 0      | T |
| 10 | BICF2P490171            | 46090107 | G | 0   | 0      | A |
| 10 | BICF2P538238            | 46119710 | A | 0.5 | 0.5    | G |
| 10 | BICF2P883157            | 46133097 | A | 0   | 0      | G |
| 10 | BICF2S23725864          | 46142053 | G | 0.5 | 0.5    | A |
| 10 | BICF2S23248987          | 46159904 | C | 0.5 | 0.5    | A |
| 10 | BICF2P904777            | 46162557 | A | 0   | 0      | G |
| 10 | BICF2P516844            | 46165181 | G | 0.5 | 0.5    | A |
| 10 | BICF2P719245            | 46172615 | A | 0.5 | 0.5    | G |
| 10 | BICF2P491531            | 46188597 | C | 0.5 | 0.5    | A |
| 10 | BICF2P491532            | 46189138 | C | 0.5 | 0.5    | A |
| 10 | BICF2P1398946           | 46192454 | A | 0.5 | 0.5    | G |
| 10 | BICF2P975062            | 46202123 | G | 0.5 | 0.2857 | A |
| 10 | BICF2P1010653           | 46213908 | G | 0.5 | 0.5    | A |
| 10 | BICF2P621532            | 46228328 | G | 0.5 | 0.2857 | A |
| 10 | BICF2P892190            | 46233715 | G | 0   | 0      | A |
| 10 | BICF2S23113199          | 46246942 | A | 0.5 | 0.2857 | G |
| 10 | BICF2P759701            | 46255012 | A | 0   | 0      | C |

|    |                         |          |   |     |        |   |
|----|-------------------------|----------|---|-----|--------|---|
| 10 | BICF2P310568            | 46271817 | A | 0.5 | 0.2857 | T |
| 10 | BICF2S2346831           | 46282707 | A | 0   | 0      | G |
| 10 | BICF2P480197            | 46288578 | 0 | 0   | 0      | A |
| 10 | BICF2P453093            | 46317142 | G | 0   | 0      | A |
| 10 | BICF2S23216408          | 46338238 | A | 0.5 | 0.5    | G |
| 10 | TIGRP2P140009_rs8729527 | 46350461 | 0 | 0   | 0      | A |
| 10 | BICF2S23433663          | 46356582 | G | 0   | 0      | A |
| 10 | TIGRP2P140015_rs8854829 | 46368121 | C | 0   | 0      | A |
| 10 | TIGRP2P140020_rs8669028 | 46386701 | A | 0.5 | 0.5    | G |
| 10 | BICF2P193369            | 46400237 | A | 1   | 1      | C |
| 10 | BICF2P777318            | 46412804 | C | 0   | 0      | A |
| 10 | BICF2P1265867           | 46419917 | A | 0   | 0      | G |
| 10 | TIGRP2P140032_rs8813807 | 46434749 | C | 0   | 0      | A |
| 10 | BICF2P175859            | 46439004 | 0 | 0   | 0      | A |
| 10 | BICF2P1007870           | 46458607 | A | 1   | 1      | G |
| 10 | BICF2P824541            | 46461792 | 0 | 0   | 0      | G |
| 10 | BICF2P64662             | 46473282 | A | 0   | 0      | G |
| 10 | BICF2P1415306           | 46496773 | A | 0   | 0      | G |
| 10 | BICF2P1111589           | 46516468 | G | 0   | 0      | A |
| 10 | BICF2P1113556           | 46521178 | G | 0   | 0      | A |
| 10 | BICF2S23635132          | 46535350 | G | 0   | 0      | A |
| 10 | BICF2P676636            | 46544502 | A | 0   | 0      | G |
| 10 | BICF2P431557            | 46554064 | A | 0   | 0      | G |
| 10 | BICF2S2294616           | 46571139 | G | 0   | 0      | A |
| 10 | BICF2P599505            | 46580732 | G | 0   | 0      | A |
| 10 | BICF2S22942867          | 46592080 | A | 0   | 0      | C |
| 10 | BICF2S23554214          | 46601724 | A | 0   | 0      | G |
| 10 | BICF2P194025            | 46617231 | A | 0   | 0      | G |
| 10 | BICF2P929545            | 46631044 | G | 0   | 0      | A |
| 10 | BICF2P117210            | 46641861 | 0 | 0   | 0      | A |
| 10 | BICF2P1225214           | 46663039 | G | 0.5 | 0.2857 | A |
| 10 | TIGRP2P140041_rs9096548 | 46680527 | G | 1   | 1      | A |
| 10 | BICF2P336294            | 46698137 | C | 0.5 | 0.7143 | A |
| 10 | BICF2P800683            | 46701575 | 0 | 0   | 0      | A |
| 10 | BICF2P695666            | 46718324 | G | 0.5 | 0.7143 | A |
| 10 | BICF2P269282            | 46729702 | A | 0.5 | 0.7143 | G |
| 10 | BICF2P334671            | 46738918 | 0 | 0   | 0      | A |
| 10 | BICF2P92787             | 46802461 | G | 0.5 | 0.7143 | C |
| 10 | BICF2P76950             | 46814829 | A | 0.5 | 0.7143 | C |
| 10 | BICF2P666500            | 46835010 | 0 | 0   | 0      | G |
| 10 | BICF2P1060082           | 46848298 | A | 0.5 | 0.7143 | G |
| 10 | BICF2S22922842          | 46859412 | A | 0   | 0      | T |
| 10 | BICF2P515506            | 46865964 | 0 | 0   | 0      | G |
| 10 | BICF2S22930022          | 46877388 | G | 0   | 0      | A |
| 10 | TIGRP2P140098_rs8747466 | 46891415 | 0 | 0   | 0      | A |
| 10 | BICF2P199429            | 46899038 | 0 | 0   | 0      | G |
| 10 | BICF2S245243            | 46911528 | T | 0   | 0      | A |

|    |                         |          |   |    |   |   |
|----|-------------------------|----------|---|----|---|---|
| 10 | BICF2P1272856           | 46961231 | G | 1  | 1 | A |
| 10 | TIGRP2P140102_rs8686598 | 46969605 | A | 1  | 1 | G |
| 10 | TIGRP2P140108_rs8831631 | 46979398 | A | 1  | 1 | C |
| 10 | BICF2S23112136          | 46996672 | 0 | 0  | 0 | G |
| 10 | TIGRP2P140123_rs9039152 | 47011584 | A | 0  | 0 | G |
| 10 | BICF2P765310            | 47012961 | A | 0  | 0 | C |
| 10 | BICF2P1423434           | 47034725 | C | 0  | 0 | A |
| 10 | TIGRP2P140131_rs8524939 | 47038721 | G | 0  | 0 | A |
| 10 | BICF2P1055222           | 47049629 | C | 0  | 0 | A |
| 10 | BICF2P604806            | 47058957 | A | 0  | 0 | T |
| 10 | BICF2P975750            | 47078351 | A | 0  | 0 | G |
| 10 | BICF2P430768            | 47084456 | A | 0  | 0 | G |
| 10 | BICF2P1167660           | 47096763 | G | 0  | 0 | A |
| 10 | BICF2P1161631           | 47105569 | G | 1  | 1 | C |
| 10 | BICF2P978820            | 47132553 | 0 | 0  | 0 | A |
| 10 | BICF2P1052375           | 47147239 | 0 | 0  | 0 | A |
| 10 | BICF2P1369747           | 47154045 | 0 | 0  | 0 | A |
| 10 | BICF2S23712415          | 47162314 | 0 | 0  | 0 | A |
| 10 | BICF2P131546            | 47174270 | 0 | 0  | 0 | G |
| 10 | BICF2P657987            | 47218092 | 0 | 0  | 0 | C |
| 10 | BICF2S23727804          | 47237475 | A | 0  | 0 | G |
| 10 | BICF2S2412201           | 47254227 | G | 0  | 0 | A |
| 10 | G602f57S143             | 47268009 | G | 0  | 0 | A |
| 10 | BICF2P510591            | 47296613 | 0 | NA | 0 | G |
| 10 | BICF2P737332            | 47300591 | 0 | 0  | 0 | A |
| 10 | BICF2P1185080           | 47311801 | 0 | 0  | 0 | A |
| 10 | BICF2S23238847          | 47338487 | G | 0  | 0 | A |
| 10 | BICF2S23238846          | 47338727 | C | 0  | 0 | A |
| 10 | BICF2P1042520           | 47356309 | 0 | 0  | 0 | A |
| 10 | BICF2P1042521           | 47357591 | A | 0  | 0 | G |
| 10 | BICF2P605501            | 47373081 | A | 0  | 0 | G |
| 10 | BICF2S23045738          | 47383468 | 0 | 0  | 0 | A |
| 10 | TIGRP2P140159_rs8731160 | 47403195 | C | 0  | 0 | A |
| 10 | BICF2P499465            | 47427981 | A | 0  | 0 | G |
| 10 | BICF2P642641            | 47439047 | 0 | 0  | 0 | A |
| 10 | BICF2P218081            | 47449467 | G | 0  | 0 | A |
| 10 | BICF2P1265786           | 47464232 | A | 0  | 0 | G |
| 10 | BICF2S23119583          | 47471291 | G | 0  | 0 | A |
| 10 | TIGRP2P140186_rs9014262 | 47476963 | A | 0  | 0 | G |
| 10 | BICF2S23249786          | 47486547 | A | 0  | 0 | G |
| 10 | BICF2P26578             | 47495987 | A | 0  | 0 | G |
| 10 | BICF2P1325377           | 47512353 | A | 0  | 0 | G |
| 10 | TIGRP2P140244_rs8909636 | 47524260 | C | 0  | 0 | A |
| 10 | BICF2S2296279           | 47548376 | G | 0  | 0 | A |
| 10 | BICF2P441145            | 47557787 | 0 | 0  | 0 | A |
| 10 | BICF2P514757            | 47585417 | A | 0  | 0 | G |
| 10 | TIGRP2P140252_rs9192317 | 47597928 | 0 | 0  | 0 | G |

|    |                         |          |   |     |        |   |
|----|-------------------------|----------|---|-----|--------|---|
| 10 | G603f51S284             | 47609870 | 0 | 0   | 0      | C |
| 10 | BICF2P1301151           | 47632376 | A | 0   | 0      | C |
| 10 | TIGRP2P140253_rs8827627 | 47643611 | C | 0   | 0      | A |
| 10 | BICF2P1330339           | 47654742 | 0 | 0   | 0      | C |
| 10 | BICF2P1330338           | 47660038 | G | 0   | 0      | A |
| 10 | BICF2P631582            | 47668766 | A | 0   | 0      | G |
| 10 | BICF2P751397            | 47688095 | A | 0   | 0      | G |
| 10 | BICF2P1212053           | 47701080 | G | 0   | 0      | A |
| 10 | BICF2P264175            | 47707894 | G | 0   | 0      | A |
| 10 | BICF2P837939            | 47713981 | G | 0   | 0      | A |
| 10 | TIGRP2P140282_rs8581088 | 47737234 | A | 0   | 0      | G |
| 10 | BICF2P173604            | 47752745 | G | 0   | 0      | A |
| 10 | BICF2P249010            | 47772095 | G | 0   | 0      | A |
| 10 | BICF2P423562            | 47783793 | A | 0   | 0      | C |
| 10 | BICF2P303476            | 47813250 | A | 0   | 0      | G |
| 10 | BICF2P552450            | 47819114 | A | 0   | 0      | C |
| 10 | BICF2P1164247           | 47828720 | A | 0   | 0      | G |
| 10 | BICF2P1013873           | 47842307 | C | 0   | 0      | G |
| 10 | BICF2P1013871           | 47843323 | G | 0   | 0      | A |
| 10 | BICF2P354371            | 47856083 | A | 0   | 0      | G |
| 10 | BICF2P795320            | 47866916 | G | 0   | 0      | A |
| 10 | BICF2P582256            | 47878552 | 0 | 0   | 0      | A |
| 10 | BICF2P1274358           | 47887520 | 0 | 0   | 0      | A |
| 10 | BICF2P320070            | 47900208 | A | 0   | 0      | G |
| 10 | BICF2P1032271           | 47909444 | A | 0   | 0      | C |
| 10 | BICF2P879265            | 47924184 | A | 0   | 0      | G |
| 10 | BICF2S23044711          | 47932496 | G | 0   | 0      | A |
| 10 | BICF2P640502            | 47949621 | A | 0   | 0      | G |
| 10 | BICF2P579019            | 47959122 | A | 0   | 0      | G |
| 10 | BICF2P382989            | 47977206 | G | 0   | 0      | A |
| 10 | BICF2P410787            | 47980584 | C | 0   | 0      | A |
| 10 | BICF2P320635            | 47989661 | A | 0   | 0      | T |
| 10 | BICF2S22939177          | 48004279 | 0 | 0   | 0      | G |
| 10 | TIGRP2P140337_rs9008188 | 48021549 | A | 0   | 0      | G |
| 10 | BICF2P576184            | 48028764 | 0 | 0   | 0      | A |
| 10 | BICF2S23135825          | 48045077 | G | 0.5 | 0.2857 | A |
| 10 | BICF2S23431884          | 48055479 | A | 0.5 | 0.2857 | C |
| 10 | BICF2P844381            | 48067447 | C | 0.5 | 0.2857 | G |
| 10 | TIGRP2P140341_rs9138355 | 48089405 | G | 0   | 0      | C |
| 10 | BICF2P797500            | 48096023 | G | 0   | 0      | A |
| 10 | BICF2P190591            | 48106191 | A | 0   | 0      | G |
| 10 | BICF2P662426            | 48116743 | A | 0   | 0      | C |
| 10 | TIGRP2P140359_rs9202217 | 48139032 | 0 | 0   | 0      | C |
| 10 | BICF2P839270            | 48153911 | A | 0.5 | 0.2857 | G |
| 10 | BICF2P1245418           | 48162209 | A | 0.5 | 0.2857 | G |
| 10 | BICF2P351285            | 48174656 | G | 0.5 | 0.2857 | A |
| 10 | BICF2P473593            | 48188141 | A | 0.5 | 0.7143 | G |

|    |                         |          |   |      |        |   |
|----|-------------------------|----------|---|------|--------|---|
| 10 | BICF2P436022            | 48202682 | G | 0.5  | 0.2857 | A |
| 10 | BICF2P230142            | 48215980 | 0 | 0    | 0      | C |
| 10 | BICF2P1306137           | 48229894 | G | 0.5  | 0.7143 | A |
| 10 | BICF2P637575            | 48236520 | G | 0    | 0      | A |
| 10 | BICF2P699235            | 48261183 | G | 0    | 0      | A |
| 10 | BICF2S23233393          | 48267951 | G | 0    | 0      | A |
| 10 | BICF2S22945304          | 48284503 | A | 0.5  | 0.2857 | G |
| 10 | BICF2S23434367          | 48293365 | A | 0    | 0      | G |
| 10 | BICF2P55149             | 48301085 | A | 0    | 0      | G |
| 10 | BICF2S23426470          | 48312738 | A | 0.5  | 0.7143 | C |
| 10 | TIGRP2P140368_rs9064797 | 48326484 | A | 0    | 0      | G |
| 10 | BICF2S23415217          | 48334976 | C | 0    | 0      | A |
| 10 | BICF2P737166            | 48347204 | G | 0    | 0      | A |
| 10 | BICF2P1137388           | 48358942 | C | 0    | 0      | A |
| 10 | BICF2P344756            | 48373684 | A | 0    | 0      | G |
| 10 | BICF2P1107602           | 48385624 | G | 0.5  | 0.7143 | A |
| 10 | BICF2P1173568           | 48394140 | 0 | 0    | 0      | A |
| 10 | BICF2P1435551           | 48411303 | A | 0    | 0      | G |
| 10 | BICF2S23418599          | 48426030 | A | 0    | 0      | G |
| 10 | BICF2S23741895          | 48429328 | G | 0    | 0      | A |
| 10 | BICF2P399575            | 48444897 | C | 0    | 0      | A |
| 10 | BICF2P797208            | 48449898 | G | 0.5  | 0.7143 | A |
| 10 | BICF2P178143            | 48467464 | A | 0    | 0      | C |
| 10 | TIGRP2P140388_rs9190295 | 48473026 | A | 0.5  | 0.7143 | G |
| 10 | BICF2P1060335           | 48486356 | G | 0.5  | 0.75   | A |
| 10 | BICF2P140940            | 48496503 | A | 0.5  | 0.7143 | C |
| 10 | BICF2P135433            | 48525079 | A | 0    | 0      | G |
| 10 | TIGRP2P140413_rs9038337 | 48530062 | C | 0.5  | 0.7143 | G |
| 10 | TIGRP2P140421_rs9246415 | 48542279 | A | 1    | 1      | C |
| 10 | TIGRP2P140422_rs9246416 | 48542479 | A | 0.5  | 0.7143 | G |
| 10 | BICF2P170971            | 48558502 | G | 0    | 0      | A |
| 10 | BICF2P1198312           | 48570589 | A | 0    | 0      | C |
| 10 | BICF2S2344451           | 48582562 | A | 0.25 | 0.3571 | G |
| 10 | BICF2S23327324          | 48594997 | A | 0.25 | 0.3571 | G |
| 10 | TIGRP2P140443_rs8563943 | 48604921 | A | 0.5  | 0.7143 | G |
| 10 | TIGRP2P140445_rs9175617 | 48615487 | T | 0    | 0      | A |
| 10 | BICF2S23111064          | 48627995 | A | 0    | 0      | G |
| 10 | TIGRP2P140464_rs8948715 | 48656355 | A | 0    | 0      | G |
| 10 | BICF2P813747            | 48672173 | A | NA   | 0      | C |
| 10 | BICF2P1201439           | 48685647 | A | 0    | 0      | C |
| 10 | BICF2P527115            | 48694059 | G | 0    | 0      | A |
| 10 | BICF2P777362            | 48703125 | G | 0    | 0      | A |
| 10 | BICF2P160200            | 48717626 | A | 0.5  | 0.2857 | G |
| 10 | BICF2P158891            | 48726542 | G | 0.5  | 0.7143 | A |
| 10 | BICF2P538817            | 48747235 | C | 0.5  | 0.7143 | A |
| 10 | TIGRP2P140479_rs9194695 | 48758362 | A | 0    | 0      | G |
| 10 | BICF2P519537            | 48781928 | 0 | 0    | 0      | A |

|    |                         |          |   |     |        |   |
|----|-------------------------|----------|---|-----|--------|---|
| 10 | BICF2P417813            | 48783951 | A | 0   | 0      | G |
| 10 | BICF2P919131            | 48795460 | A | 0   | 0      | G |
| 10 | BICF2P895044            | 48802826 | G | 0   | 0      | A |
| 10 | TIGRP2P140494_rs8891607 | 48806189 | C | 0   | 0      | G |
| 10 | BICF2P1215157           | 48824301 | A | 0   | 0      | G |
| 10 | TIGRP2P140509_rs9125003 | 48836095 | 0 | 0   | 0      | A |
| 10 | BICF2P815806            | 48844290 | 0 | 0   | 0      | G |
| 10 | BICF2S23737472          | 48852437 | A | 0.5 | 0.7143 | G |
| 10 | BICF2P895715            | 48873222 | G | 0   | 0      | A |
| 10 | BICF2P1375311           | 48881546 | 0 | 0   | 0      | G |
| 10 | BICF2S2312577           | 48896281 | A | 0   | 0      | G |
| 10 | BICF2P469762            | 48902006 | C | 0   | 0      | G |
| 10 | BICF2P1058389           | 48922960 | 0 | 0   | 0      | G |
| 10 | BICF2P556028            | 48939909 | 0 | 0   | 0      | G |
| 10 | TIGRP2P140530_rs8684144 | 48948980 | C | 0   | 0      | A |
| 10 | BICF2P405980            | 48963402 | 0 | 0   | 0      | G |
| 10 | BICF2P823791            | 48976608 | 0 | 0   | 0      | A |
| 10 | BICF2P884191            | 48988278 | A | 0   | 0      | G |
| 10 | TIGRP2P140531_rs8593773 | 49005496 | G | 0   | 0      | C |
| 10 | TIGRP2P140533_rs8830620 | 49018112 | G | 0   | 0      | A |
| 10 | BICF2P1142650           | 49035909 | G | 0   | 0      | A |
| 10 | BICF2P1142649           | 49036517 | A | 0   | 0      | G |
| 10 | BICF2P1251048           | 49051740 | C | 0   | 0      | A |
| 10 | TIGRP2P140547_rs8942444 | 49062328 | C | 0   | 0      | A |
| 10 | BICF2S23251816          | 49081773 | A | 0   | 0      | G |
| 10 | BICF2P1174613           | 49092792 | A | 0   | 0      | T |
| 10 | BICF2P613390            | 49111244 | 0 | 0   | 0      | A |
| 10 | TIGRP2P140552_rs8980453 | 49147523 | A | 0   | 0      | G |
| 10 | TIGRP2P140554_rs8674357 | 49162133 | G | 0   | 0      | A |
| 10 | BICF2S23210774          | 49177648 | 0 | 0   | 0      | G |
| 10 | BICF2P715511            | 49190173 | 0 | 0   | 0      | G |
| 10 | BICF2P1090099           | 49223755 | A | 0   | 0      | G |
| 10 | BICF2P364534            | 49241973 | A | 0   | 0      | G |
| 10 | BICF2P563295            | 49247767 | G | 0   | 0      | A |
| 10 | BICF2P1125295           | 49261464 | A | 0.5 | 0.7143 | G |
| 10 | BICF2P475960            | 49267100 | A | 0.5 | 0.7143 | G |
| 10 | BICF2P743042            | 49278236 | A | 0.5 | 0.7143 | G |
| 10 | BICF2P324205            | 49315986 | G | 0.5 | 0.75   | A |
| 10 | BICF2P231168            | 49323883 | G | 0.5 | 0.7143 | A |
| 10 | BICF2P750403            | 49357690 | G | 0   | 0      | A |
| 10 | TIGRP2P140598_rs8921159 | 49359295 | G | 0   | 0      | A |
| 10 | BICF2P1325940           | 49378606 | 0 | NA  | 0      | C |
| 10 | BICF2P638205            | 49386335 | A | 0   | 0      | T |
| 10 | BICF2S23114872          | 49393762 | A | 0   | 0      | G |
| 10 | TIGRP2P140615_rs8835746 | 49408320 | G | 0   | 0      | A |
| 10 | BICF2P915373            | 49408463 | A | 0   | 0      | G |
| 10 | BICF2P1167552           | 49415564 | G | 0   | 0      | A |

|    |                         |          |   |      |        |   |
|----|-------------------------|----------|---|------|--------|---|
| 10 | BICF2P159927            | 49420291 | A | 0    | 0      | G |
| 10 | BICF2P1018381           | 49424827 | A | 0    | 0      | C |
| 10 | BICF2P868981            | 49431717 | A | 0    | 0      | G |
| 10 | BICF2P580773            | 49441321 | G | 0.5  | 0.2857 | A |
| 10 | BICF2P309612            | 49450123 | A | 0.5  | 0.2857 | G |
| 10 | TIGRP2P140627_rs8986483 | 49470182 | C | 0.5  | 0.7143 | A |
| 10 | BICF2S23157851          | 49479603 | G | 0.5  | 0.75   | A |
| 10 | BICF2S23028302          | 49486311 | A | 0.5  | 0.7143 | G |
| 10 | BICF2P729369            | 49502113 | A | 0.5  | 0.7143 | G |
| 10 | BICF2P285574            | 49512150 | G | 0.5  | 0.7143 | A |
| 10 | TIGRP2P140634_rs8550304 | 49523070 | A | 0.5  | 0.7143 | C |
| 10 | TIGRP2P140638_rs8848702 | 49533942 | G | 0.5  | 0.7143 | A |
| 10 | TIGRP2P140640_rs9200059 | 49548921 | G | 0.5  | 0.7143 | A |
| 10 | TIGRP2P140646_rs8651520 | 49563710 | G | 0.25 | 0.3571 | A |
| 10 | BICF2P1103247           | 49572877 | A | 0.25 | 0.3571 | C |
| 10 | BICF2P1056332           | 49584101 | A | 0.75 | 0.6429 | G |
| 10 | BICF2P601639            | 49593364 | A | 0.25 | 0.3571 | C |
| 10 | TIGRP2P140656_rs9033492 | 49602733 | G | 0.5  | 0.7143 | A |
| 10 | TIGRP2P140659_rs8653000 | 49618598 | A | 0.25 | 0.3571 | G |
| 10 | BICF2P371832            | 49635540 | A | 0.25 | 0.3571 | G |
| 10 | BICF2S23911776          | 49652314 | G | 0    | 0      | A |
| 10 | BICF2P98311             | 49688292 | G | 0    | 0      | A |
| 10 | BICF2P378903            | 49691606 | G | 0    | 0      | A |
| 10 | BICF2P1073054           | 49703702 | G | 0    | 0      | A |
| 10 | BICF2P316680            | 49715500 | G | 0.25 | 0.3571 | A |
| 10 | BICF2P1328944           | 49745955 | A | 0.25 | 0.3571 | G |
| 10 | BICF2P550910            | 49761427 | A | 0.25 | 0.3571 | C |
| 10 | BICF2P475378            | 49773186 | A | 0    | 0      | G |
| 10 | BICF2P1371746           | 49787246 | A | 0.5  | 0.2857 | G |
| 10 | BICF2P1002982           | 49797389 | A | 0.25 | 0.3571 | G |
| 10 | BICF2P1338749           | 49810449 | A | 0.25 | 0.3571 | C |
| 10 | BICF2P1083924           | 49819838 | C | 0.25 | 0.3571 | A |
| 10 | BICF2S2329136           | 49830222 | G | 0.25 | 0.3571 | A |
| 10 | BICF2P1394262           | 49843900 | C | 0.25 | 0.3571 | A |
| 10 | BICF2P583269            | 49853194 | G | 0    | 0      | C |
| 10 | BICF2P1305225           | 49866589 | A | 0.25 | 0.3571 | G |
| 10 | BICF2P513683            | 49883282 | G | 0.25 | 0.3571 | A |
| 10 | BICF2P365225            | 49897267 | T | 0.25 | 0.3571 | A |
| 10 | BICF2P512821            | 49903482 | G | 0.25 | 0.3571 | A |
| 10 | BICF2S23041026          | 49961459 | C | 0    | 0      | A |
| 10 | BICF2S23514637          | 49968155 | G | 0    | 0      | A |
| 10 | BICF2S23719690          | 49990618 | G | 0    | 0      | A |
| 10 | BICF2P104632            | 50017784 | 0 | 0    | 0      | A |
| 10 | BICF2S2294875           | 50048089 | A | 0.25 | 0.3571 | G |
| 10 | TIGRP2P140746_rs8514365 | 50070417 | 0 | 0    | 0      | A |
| 10 | G605f45S73              | 50106985 | 0 | 0    | 0      | C |
| 10 | BICF2S23719213          | 50132283 | A | 0.5  | 0.75   | G |



|    |                         |          |   |      |        |   |
|----|-------------------------|----------|---|------|--------|---|
| 10 | BICF2S239504            | 50168821 | A | 0    | 0      | G |
| 10 | BICF2P735527            | 50191317 | 0 | 0    | 0      | A |
| 10 | TIGRP2P140753_rs9087643 | 50215599 | 0 | 0    | 0      | G |
| 10 | TIGRP2P140754_rs8959982 | 50221671 | 0 | 0    | 0      | C |
| 10 | G607f36S111             | 50232652 | A | 0.25 | 0.3571 | G |
| 10 | BICF2P734255            | 50253444 | 0 | 0    | 0      | C |
| 10 | BICF2P971107            | 50275862 | 0 | 0    | 0      | G |
| 10 | BICF2P1549              | 50287047 | 0 | 0    | 0      | G |
| 10 | BICF2S23519584          | 50295069 | A | 0    | 0      | G |
| 10 | BICF2P1396858           | 50308719 | G | 0    | 0      | A |
| 10 | BICF2P1396854           | 50311980 | C | 0    | 0      | A |
| 10 | BICF2P310475            | 50312580 | 0 | 0    | 0      | A |
| 10 | BICF2P306713            | 50324698 | A | 0.25 | 0.3571 | G |
| 10 | BICF2P575763            | 50350387 | A | 0.75 | 0.6429 | G |
| 10 | BICF2P1295202           | 50361732 | A | 0    | 0      | C |
| 10 | BICF2S23319924          | 50379748 | A | 0    | 0      | G |
| 10 | BICF2P1284430           | 50388961 | G | 0.75 | 0.6429 | A |
| 10 | BICF2S23025171          | 50402063 | G | 0.75 | 0.6429 | A |
| 10 | BICF2S23014216          | 50405977 | A | 0.75 | 0.6429 | G |
| 10 | BICF2S23550619          | 50425538 | T | 0.75 | 0.6429 | A |
| 10 | BICF2P1172998           | 50431903 | G | 0.75 | 0.6429 | A |
| 10 | TIGRP2P140794_rs8553661 | 50435520 | A | 0.75 | 0.6429 | G |
| 10 | TIGRP2P140798_rs8946486 | 50441059 | 0 | 0    | 0      | C |
| 10 | BICF2P625002            | 50469408 | 0 | 0    | 0      | G |
| 10 | BICF2P963328            | 50482360 | A | 0.25 | 0.3571 | G |
| 10 | BICF2P652022            | 50495458 | A | 0.75 | 0.6429 | G |
| 10 | BICF2P652397            | 50499295 | G | 0.75 | 0.6429 | A |
| 10 | TIGRP2P140815_rs8868057 | 50508920 | G | 0    | 0      | A |
| 10 | BICF2S23638822          | 50530312 | C | 0    | 0      | A |
| 10 | TIGRP2P140824_rs8834559 | 50531990 | A | 0    | 0      | G |
| 10 | TIGRP2P140833_rs9046989 | 50543709 | A | 0    | 0      | G |
| 10 | BICF2S23036635          | 50558977 | A | 0    | 0      | G |
| 10 | BICF2S23760334          | 50568595 | A | 0.25 | 0.3571 | G |
| 10 | BICF2S23036428          | 50585703 | G | 0.25 | 0.3571 | A |
| 10 | BICF2P879346            | 50601178 | A | 0.25 | 0.3571 | G |
| 10 | BICF2P370816            | 50614162 | A | 0.25 | 0.3571 | G |
| 10 | BICF2S23337089          | 50618364 | A | 0.25 | 0.3571 | G |
| 10 | BICF2S234632            | 50627370 | A | 0    | 0      | G |
| 10 | TIGRP2P140864_rs8561246 | 50637973 | C | 0    | 0      | A |
| 10 | BICF2P685406            | 50654077 | A | 0.25 | 0.3571 | G |
| 10 | BICF2P1413307           | 50667609 | A | 0.25 | 0.3    | G |
| 10 | BICF2P1413306           | 50667939 | A | 0    | 0      | G |
| 10 | BICF2P236853            | 50676680 | 0 | 0    | 0      | G |
| 10 | BICF2S22911780          | 50689352 | A | 0    | 0      | T |
| 10 | TIGRP2P140870_rs8594984 | 50699600 | C | 0    | 0      | G |
| 10 | BICF2P1396250           | 50707576 | G | 0    | 0      | A |
| 10 | BICF2P1276314           | 50712625 | A | 0    | 0      | T |

|    |                         |          |   |      |        |   |
|----|-------------------------|----------|---|------|--------|---|
| 10 | BICF2P1416883           | 50720841 | A | 0    | 0      | G |
| 10 | BICF2S23426994          | 50729667 | A | 0    | 0      | G |
| 10 | BICF2S23412302          | 50733918 | A | 0    | 0      | G |
| 10 | BICF2P706009            | 50748819 | A | 0    | 0      | G |
| 10 | BICF2P1174831           | 50757085 | G | 0    | 0      | A |
| 10 | TIGRP2P140889_rs8627994 | 50767357 | A | 0    | 0      | G |
| 10 | BICF2P1271347           | 50767454 | G | 0    | 0      | A |
| 10 | BICF2P1421263           | 50779600 | G | 0    | 0      | A |
| 10 | TIGRP2P140898_rs8847984 | 50784215 | A | 0    | 0      | G |
| 10 | TIGRP2P140899_rs8880524 | 50801676 | A | 0    | 0      | G |
| 10 | BICF2P1429720           | 50805618 | A | 0    | 0      | G |
| 10 | TIGRP2P140903_rs8931164 | 50809044 | A | 0    | 0      | T |
| 10 | BICF2P471586            | 50819428 | A | 0    | 0      | C |
| 10 | BICF2P727502            | 50856455 | A | 0    | 0      | G |
| 10 | BICF2P817476            | 50876352 | G | 0.75 | 0.6429 | A |
| 10 | BICF2P280956            | 50889458 | A | 0    | 0      | G |
| 10 | BICF2S23430723          | 50904244 | G | 0    | 0      | A |
| 10 | BICF2P1179211           | 50915861 | G | 0.75 | 0.6429 | A |
| 10 | BICF2P563108            | 50923309 | A | 0    | 0      | G |
| 10 | BICF2P950087            | 50934157 | G | 0    | 0      | A |
| 10 | TIGRP2P140909_rs8911642 | 50952878 | T | 0    | 0      | A |
| 10 | BICF2P797997            | 50967110 | C | 0    | 0      | A |
| 10 | BICF2S2333017           | 50973375 | G | 0    | 0      | A |
| 10 | BICF2P1229357           | 50989016 | A | 0    | 0      | C |
| 10 | BICF2P138204            | 50999225 | A | 0    | 0      | G |
| 10 | TIGRP2P140920_rs8563734 | 51003990 | G | 0    | 0      | A |
| 10 | BICF2P1324352           | 51027235 | A | 0    | 0      | G |
| 10 | TIGRP2P140942_rs8957933 | 51047274 | A | 0    | 0      | G |
| 10 | BICF2S2452559           | 51049130 | A | 0    | 0      | G |
| 10 | BICF2P1371660           | 51067926 | A | 0    | 0      | C |
| 10 | BICF2S2357364           | 51073299 | C | 0    | 0      | A |
| 10 | BICF2S2335025           | 51091105 | C | 0    | 0      | A |
| 10 | TIGRP2P140954_rs8835950 | 51104711 | A | 0    | 0      | G |
| 10 | BICF2P1281970           | 51111495 | A | 0    | 0      | G |
| 10 | BICF2P212239            | 51120198 | G | 0    | 0      | A |
| 10 | BICF2P697079            | 51160281 | A | 0    | 0      | C |
| 10 | BICF2P910465            | 51180552 | A | 0    | 0      | G |
| 10 | BICF2P1095909           | 51187023 | A | 0    | 0      | G |
| 10 | BICF2P1346869           | 51205222 | A | 0.5  | 0.2857 | G |
| 10 | BICF2P409457            | 51211022 | C | 0.5  | 0.2857 | A |
| 10 | BICF2P175559            | 51225872 | A | 0.75 | 0.6429 | T |
| 10 | BICF2P43725             | 51238416 | G | 0    | 0      | A |
| 10 | BICF2P1355694           | 51254374 | A | 0.5  | 0.2857 | G |
| 10 | BICF2S23043872          | 51256560 | G | 0.5  | 0.2857 | A |
| 10 | BICF2P1296086           | 51284373 | A | 0.25 | 0.3571 | G |
| 10 | BICF2S22947221          | 51291943 | A | 0.25 | 0.3571 | G |
| 10 | TIGRP2P141001_rs8509255 | 51302709 | A | 0    | 0      | G |

|    |                         |          |   |      |        |   |
|----|-------------------------|----------|---|------|--------|---|
| 10 | BICF2P916076            | 51322765 | A | 0    | 0      | G |
| 10 | BICF2P559995            | 51326866 | G | 0    | 0      | A |
| 10 | BICF2P135325            | 51339239 | A | 0    | 0      | G |
| 10 | BICF2P969034            | 51358165 | 0 | 0    | 0      | T |
| 10 | TIGRP2P141014_rs9146482 | 51370493 | 0 | 0    | 0      | G |
| 10 | BICF2P1263933           | 51371186 | 0 | 0    | 0      | A |
| 10 | BICF2S2345939           | 51384418 | A | 0    | 0      | G |
| 10 | BICF2S23438101          | 51396993 | A | 0.5  | 0.7143 | G |
| 10 | BICF2S232399            | 51409615 | A | 0.25 | 0.3571 | C |
| 10 | BICF2P792386            | 51418120 | A | 0.5  | 0.2857 | G |
| 10 | BICF2P604767            | 51433223 | G | 0    | 0      | A |
| 10 | BICF2P630147            | 51440869 | A | 0    | 0      | G |
| 10 | BICF2P72878             | 51452644 | G | 0    | 0      | A |
| 10 | BICF2S23635809          | 51471125 | A | 0.75 | 0.6429 | G |
| 10 | BICF2P671728            | 51484860 | A | 0.5  | 0.7143 | G |
| 10 | BICF2S23722746          | 51492917 | A | 0    | 0      | G |
| 10 | BICF2S23421028          | 51497234 | G | 0    | 0      | A |
| 10 | BICF2S23046875          | 51540995 | A | 0    | 0      | G |
| 10 | TIGRP2P141038_rs8671023 | 51560110 | A | 0.75 | 0.6429 | G |
| 10 | BICF2P916178            | 51583544 | G | 0    | 0      | A |
| 10 | TIGRP2P141065_rs8714074 | 51594381 | A | 0    | 0      | G |
| 10 | BICF2S2348758           | 51600870 | A | 0.75 | 0.6429 | G |
| 10 | TIGRP2P141080_rs8724112 | 51630559 | A | 0    | 0      | G |
| 10 | BICF2S23012179          | 51655799 | A | 0.25 | 0.3571 | G |
| 10 | BICF2P1437391           | 51667277 | 0 | 0    | 0      | G |
| 10 | TIGRP2P141086_rs8744982 | 51673000 | A | 0.5  | 0.2857 | G |
| 10 | BICF2P403250            | 51688753 | C | 0    | 0      | G |
| 10 | BICF2P403249            | 51688876 | A | 0    | 0      | G |
| 10 | BICF2S24321816          | 51691482 | T | 0    | 0      | A |
| 10 | BICF2P123121            | 51691502 | G | 0.25 | 0.3571 | A |
| 10 | BICF2S23662004          | 51700843 | A | 0.5  | 0.7143 | G |
| 10 | TIGRP2P141098_rs8690011 | 51707292 | A | 0.5  | 0.7143 | G |
| 10 | BICF2P432142            | 51715584 | A | 0.5  | 0.2857 | G |
| 10 | BICF2P1413978           | 51730747 | A | 0    | 0      | G |
| 10 | TIGRP2P141115_rs9147834 | 51749083 | A | 0.25 | 0.3571 | G |
| 10 | TIGRP2P141117_rs8798593 | 51752770 | G | 0.75 | 0.6429 | A |
| 10 | TIGRP2P141130_rs8883070 | 51766399 | G | 0.5  | 0.2857 | A |
| 10 | BICF2P777540            | 51779247 | G | 0.25 | 0.3571 | A |
| 10 | BICF2P801124            | 51796759 | A | 0.75 | 0.6429 | G |
| 10 | BICF2S23022854          | 51809103 | A | 0    | 0      | G |
| 10 | BICF2P384680            | 51831584 | A | 0.25 | 0.3571 | G |
| 10 | BICF2S23619301          | 51847978 | G | 0    | 0      | A |
| 10 | TIGRP2P141147_rs8653133 | 51856780 | A | 0.25 | 0.3571 | G |
| 10 | BICF2P516731            | 51871909 | 0 | 0    | 0      | C |
| 10 | BICF2P1083276           | 51886583 | G | 0    | 0      | A |
| 10 | BICF2P1250183           | 51890513 | G | 0.5  | 0.25   | A |
| 10 | BICF2P936798            | 51900962 | A | 0    | 0      | G |

|    |                         |          |   |      |        |   |
|----|-------------------------|----------|---|------|--------|---|
| 10 | BICF2P113417            | 51919900 | A | 0    | 0      | G |
| 10 | BICF2P879099            | 51947930 | 0 | 0    | 0      | A |
| 10 | BICF2S234375            | 51963915 | A | 0    | 0      | G |
| 10 | BICF2P858306            | 51971059 | A | 0.5  | 0.7143 | G |
| 10 | BICF2P1027073           | 51987736 | 0 | 0    | 0      | G |
| 10 | BICF2P1438362           | 52002653 | G | 0.5  | 0.7143 | A |
| 10 | BICF2P889845            | 52005493 | A | 0.5  | 0.7143 | C |
| 10 | BICF2P1378030           | 52026673 | G | 0.5  | 0.7143 | A |
| 10 | BICF2S23327861          | 52043182 | A | 0.25 | 0.1429 | G |
| 10 | BICF2P99528             | 52071772 | 0 | 0    | 0      | A |
| 10 | BICF2P278253            | 52073435 | 0 | 0    | 0      | G |
| 10 | BICF2P1472164           | 52099240 | A | 0    | 0      | G |
| 10 | BICF2S2315239           | 52106940 | G | 0.25 | 0.1429 | A |
| 10 | BICF2S22938852          | 52140094 | A | 0.25 | 0.1429 | G |
| 10 | BICF2P210415            | 52143774 | 0 | 0    | 0      | G |
| 10 | TIGRP2P141181_rs8913846 | 52155145 | A | 0    | 0      | G |
| 10 | BICF2S2337290           | 52174626 | A | 0.25 | 0.5714 | G |
| 10 | BICF2P576093            | 52179009 | G | 0    | 0      | A |
| 10 | TIGRP2P141197_rs8856744 | 52187674 | G | 0    | 0      | A |
| 10 | BICF2S23610713          | 52206929 | G | 0.5  | 0.7143 | A |
| 10 | BICF2S23642467          | 52218830 | 0 | 0    | 0      | A |
| 10 | BICF2P969667            | 52225835 | A | 0    | 0      | G |
| 10 | BICF2P1135520           | 52230246 | 0 | 0    | 0      | A |
| 10 | TIGRP2P141213_rs9201461 | 52242593 | G | 0.75 | 0.4286 | A |
| 10 | BICF2P1243207           | 52247453 | G | 0.5  | 0.2857 | A |
| 10 | BICF2S24416625          | 52251713 | G | 0    | 0      | A |
| 10 | BICF2P223992            | 52258724 | G | 0    | 0      | A |
| 10 | BICF2P117402            | 52275976 | A | 0    | 0      | G |
| 10 | BICF2P726753            | 52289586 | A | 0    | 0      | G |
| 10 | BICF2P949124            | 52294880 | A | 0.5  | 0.2857 | G |
| 10 | BICF2P776916            | 52306228 | A | 0    | 0      | G |
| 10 | TIGRP2P141235_rs8861572 | 52313512 | A | 0    | 0      | G |
| 10 | BICF2P118402            | 52327600 | A | 0.5  | 0.2857 | G |
| 10 | BICF2P1269903           | 52346603 | G | 0    | 0      | A |
| 10 | BICF2P473982            | 52349453 | A | 0.5  | 0.2857 | G |
| 10 | BICF2P852525            | 52358185 | 0 | 0    | 0      | G |
| 10 | BICF2P852522            | 52359864 | G | 0.5  | 0.2857 | A |
| 10 | BICF2S23526628          | 52380430 | T | 0.5  | 0.2857 | A |
| 10 | BICF2P776953            | 52390719 | A | 0.5  | 0.2857 | G |
| 10 | BICF2S22963842          | 52401144 | A | 0.5  | 0.2857 | C |
| 10 | BICF2P225634            | 52415430 | A | 1    | 1      | G |
| 10 | BICF2P901643            | 52419068 | G | 0.5  | 0.2857 | A |
| 10 | BICF2P1257131           | 52467095 | 0 | 0    | 0      | G |
| 10 | BICF2P619795            | 52490239 | 0 | 0    | 0      | A |
| 10 | BICF2P312132            | 52502803 | 0 | 0    | 0      | A |
| 10 | TIGRP2P141251_rs8490278 | 52519495 | 0 | 0    | 0      | A |
| 10 | TIGRP2P141252_rs8770301 | 52527867 | G | 0.5  | 0.7143 | C |

|    |                         |          |   |      |        |   |
|----|-------------------------|----------|---|------|--------|---|
| 10 | BICF2P270912            | 52536158 | G | 0.5  | 0.7143 | A |
| 10 | BICF2P855892            | 52544922 | G | 0.5  | 0.7143 | A |
| 10 | BICF2P199862            | 52562583 | C | 0.5  | 0.2857 | A |
| 10 | BICF2P640245            | 52563503 | G | 0.5  | 0.7143 | A |
| 10 | BICF2P261423            | 52572534 | A | 0.5  | 0.7143 | G |
| 10 | TIGRP2P141287_rs9178819 | 52581028 | A | 0    | 0      | G |
| 10 | TIGRP2P141289_rs8666824 | 52595963 | A | 0.5  | 0.25   | T |
| 10 | BICF2P421203            | 52612128 | A | 0    | 0      | G |
| 10 | BICF2S2372233           | 52613170 | G | 0    | 0      | A |
| 10 | TIGRP2P141312_rs8577289 | 52641925 | A | 0    | 0      | G |
| 10 | BICF2S2337451           | 52648945 | A | 0    | 0      | T |
| 10 | BICF2P462328            | 52667964 | G | 0    | 0      | A |
| 10 | TIGRP2P141316_rs9252244 | 52671288 | C | 0    | 0      | A |
| 10 | TIGRP2P141321_rs8733429 | 52691574 | A | 0    | 0      | G |
| 10 | BICF2S2458721           | 52722466 | C | 1    | 1      | A |
| 10 | BICF2P773296            | 52729290 | G | 0    | 0      | A |
| 10 | BICF2P338997            | 52740720 | A | 0.5  | 0.7143 | G |
| 10 | BICF2S23261214          | 52767157 | 0 | 0    | 0      | A |
| 10 | BICF2S22920071          | 52790284 | G | 0.5  | 0.2857 | A |
| 10 | TIGRP2P141333_rs8824566 | 52799805 | G | 0.75 | 0.8571 | A |
| 10 | BICF2P247761            | 52818394 | G | 0    | 0      | A |
| 10 | BICF2P476459            | 52822892 | G | 0    | 0      | A |
| 10 | BICF2P988929            | 52825936 | A | 0.25 | 0.5714 | G |
| 10 | BICF2S23725116          | 52834551 | A | 0.25 | 0.1429 | C |
| 10 | BICF2P285314            | 52851819 | A | 0    | 0      | G |
| 10 | BICF2P895418            | 52855982 | A | 0.5  | 0.2857 | G |
| 10 | BICF2S23741968          | 52869812 | A | 0.5  | 0.7143 | G |
| 10 | BICF2S23128603          | 52880552 | A | 0.25 | 0.1429 | G |
| 10 | BICF2P1199470           | 52892205 | C | 0.5  | 0.2857 | G |
| 10 | BICF2S23611798          | 52907993 | 0 | 0    | 0      | G |
| 10 | BICF2P556213            | 52916168 | G | 0    | 0      | A |
| 10 | BICF2P1182788           | 52929340 | G | 0    | 0      | A |
| 10 | BICF2P1425381           | 52936780 | G | 0    | 0      | A |
| 10 | TIGRP2P141391_rs9017127 | 52947309 | G | 0    | 0      | A |
| 10 | TIGRP2P141392_rs8718435 | 52967986 | A | 0    | 0      | C |
| 10 | BICF2P594170            | 52971020 | A | 0    | 0      | G |
| 10 | BICF2S22915649          | 52988337 | A | 0    | 0      | G |
| 10 | TIGRP2P141397_rs8736971 | 53007392 | A | 0    | 0      | C |
| 10 | BICF2S23255435          | 53038303 | G | 0    | 0      | A |
| 10 | BICF2P583697            | 53054313 | C | 0    | 0      | A |
| 10 | BICF2P583698            | 53054485 | A | 0.5  | 0.7143 | G |
| 10 | BICF2S23653869          | 53069534 | C | 0.5  | 0.7143 | A |
| 10 | BICF2P609442            | 53077871 | A | 0    | 0      | C |
| 10 | BICF2P565985            | 53086080 | A | 0.25 | 0.5714 | G |
| 10 | TIGRP2P141401_rs8977842 | 53098324 | G | 0.5  | 0.5    | A |
| 10 | BICF2P1083827           | 53109869 | G | 0    | 0      | A |
| 10 | BICF2S2331161           | 53126983 | A | 0.5  | 0.2857 | G |

|    |                         |          |   |      |        |   |
|----|-------------------------|----------|---|------|--------|---|
| 10 | BICF2S23530525          | 53133635 | A | 0    | 0      | G |
| 10 | BICF2S236855            | 53150946 | A | 0.75 | 0.8571 | G |
| 10 | BICF2P1215764           | 53160425 | 0 | 0    | 0      | A |
| 10 | BICF2P207488            | 53175794 | G | 0    | 0      | A |
| 10 | BICF2P440151            | 53179016 | C | 0    | 0      | A |
| 10 | BICF2S23226724          | 53184134 | A | 0    | 0      | G |
| 10 | BICF2P1253324           | 53189812 | A | 0    | 0      | G |
| 10 | BICF2P997099            | 53203987 | A | 0    | 0      | G |
| 10 | BICF2P597204            | 53215531 | A | 0.5  | 0.2857 | T |
| 10 | BICF2P1500119           | 53229477 | G | 0    | 0      | A |
| 10 | BICF2S23639091          | 53240541 | A | 0    | 0      | G |
| 10 | BICF2P907372            | 53246768 | A | 0    | 0.1667 | G |
| 10 | TIGRP2P141414_rs9122801 | 53260097 | G | 0.5  | 0.2857 | A |
| 10 | BICF2P566165            | 53270920 | A | 0    | 0      | G |
| 10 | TIGRP2P141419_rs9011909 | 53271395 | A | 0.25 | 0.3571 | G |
| 10 | TIGRP2P141422_rs8489190 | 53289056 | C | 0    | 0      | G |
| 10 | BICF2P918072            | 53293025 | G | 0    | 0.2143 | A |
| 10 | BICF2P438704            | 53309115 | C | 0.5  | 0.5    | G |
| 10 | BICF2P941220            | 53317902 | A | 0    | 0      | G |
| 10 | TIGRP2P141437_rs8575951 | 53328196 | 0 | 0    | 0      | C |
| 10 | BICF2P258880            | 53341606 | G | 0    | 0      | A |
| 10 | BICF2P604872            | 53348622 | A | 0    | 0      | G |
| 10 | BICF2P512486            | 53360036 | C | 0.5  | 1      | A |
| 10 | BICF2S2354530           | 53379657 | A | 0.5  | 0.7143 | G |
| 10 | BICF2S23547210          | 53414958 | A | 0    | 0      | G |
| 10 | BICF2P169463            | 53429129 | 0 | 0    | 0      | A |
| 10 | BICF2P683637            | 53442186 | A | 1    | 0.7857 | G |
| 10 | BICF2S22922588          | 53482187 | G | 0    | 0      | A |
| 10 | TIGRP2P141453_rs9237505 | 53488738 | 0 | 0    | 0      | G |
| 10 | TIGRP2P141459_rs9019273 | 53499997 | A | 0    | 0      | G |
| 10 | BICF2S23426213          | 53515855 | G | 1    | 1      | A |
| 10 | BICF2P615803            | 53523113 | A | 1    | 1      | T |
| 10 | BICF2P366221            | 53536757 | G | 0.25 | 0.1429 | A |
| 10 | BICF2P730219            | 53550004 | G | 0.25 | 0.1429 | A |
| 10 | BICF2S22936632          | 53566333 | A | 0.25 | 0.3571 | C |
| 10 | BICF2S23425996          | 53569757 | A | 0.25 | 0.3571 | G |
| 10 | BICF2P809230            | 53587816 | G | 0.5  | 0.2857 | A |
| 10 | BICF2P776381            | 53590127 | G | 0.75 | 0.4286 | A |
| 10 | BICF2P620211            | 53606766 | 0 | 0    | 0      | A |
| 10 | BICF2P1254411           | 53623805 | C | 0    | 0.2143 | A |
| 10 | BICF2P36524             | 53628530 | A | 0    | 0.2143 | G |
| 10 | BICF2P1208400           | 53637289 | 0 | 0    | 0      | A |
| 10 | TIGRP2P141483_rs8749265 | 53653670 | 0 | 0    | 0      | A |
| 10 | BICF2S23327132          | 53659571 | A | 0    | 0.2143 | G |
| 10 | BICF2P1371813           | 53681435 | A | 0    | 0      | G |
| 10 | BICF2P393453            | 53691846 | C | 0    | 0      | A |
| 10 | BICF2P631129            | 53697159 | G | 0.5  | 0.7143 | A |

|    |                         |          |   |      |        |   |
|----|-------------------------|----------|---|------|--------|---|
| 10 | BICF2S22960598          | 53713692 | A | 0    | 0.2143 | T |
| 10 | TIGRP2P141497_rs8647868 | 53718723 | G | 0.5  | 0.7143 | A |
| 10 | BICF2P15564             | 53733617 | A | 0    | 0.2143 | G |
| 10 | BICF2P13519             | 53740736 | G | 0    | 0.2143 | A |
| 10 | BICF2S23539816          | 53753961 | A | 0    | 0      | C |
| 10 | TIGRP2P141512_rs8697528 | 53769678 | A | 0    | 0      | G |
| 10 | TIGRP2P141514_rs9015008 | 53781284 | A | 0    | 0      | G |
| 10 | BICF2P655769            | 53796392 | G | 0    | 0.2143 | A |
| 10 | BICF2P331380            | 53804944 | A | 1    | 0.7857 | G |
| 10 | TIGRP2P141524_rs8872031 | 53812774 | G | 1    | 0.7857 | A |
| 10 | BICF2S23339049          | 53823210 | A | 1    | 0.7857 | G |
| 10 | BICF2S23037799          | 53835151 | G | 1    | 0.7857 | A |
| 10 | BICF2P399883            | 53847224 | 0 | 0    | 0      | G |
| 10 | BICF2P1342617           | 53852362 | 0 | 0    | 0      | G |
| 10 | BICF2P806477            | 53862483 | C | 0    | 0      | A |
| 10 | BICF2P1144339           | 53869265 | A | 0    | 0      | C |
| 10 | TIGRP2P141543_rs8530373 | 53878970 | 0 | 0    | 0      | A |
| 10 | TIGRP2P141544_rs9078878 | 53894505 | A | 0    | 0      | C |
| 10 | TIGRP2P141549_rs9218744 | 53901665 | A | 0    | 0      | G |
| 10 | BICF2P168885            | 53919391 | 0 | 0    | 0      | A |
| 10 | BICF2S22934123          | 53934166 | 0 | 0    | 0      | A |
| 10 | BICF2S23247259          | 53935111 | G | 0    | 0      | A |
| 10 | TIGRP2P141551_rs9157479 | 53957273 | G | 0    | 0      | A |
| 10 | BICF2S23641669          | 53964665 | C | 1    | 1      | A |
| 10 | TIGRP2P141558_rs8713380 | 53970806 | 0 | 0    | 0      | C |
| 10 | TIGRP2P141566_rs8490935 | 53985526 | C | 1    | 1      | A |
| 10 | BICF2P241830            | 53996368 | G | 0    | 0      | A |
| 10 | BICF2P486473            | 54005203 | G | 0    | 0      | A |
| 10 | BICF2P358902            | 54016167 | 0 | 0    | 0      | A |
| 10 | BICF2P710769            | 54029095 | A | 0    | 0      | C |
| 10 | BICF2P949640            | 54047996 | 0 | 0    | 0      | G |
| 10 | BICF2P1369939           | 54053769 | A | 0    | 0      | C |
| 10 | BICF2P949653            | 54062780 | A | 0.5  | 0.5    | G |
| 10 | BICF2P1183997           | 54079736 | 0 | 0    | 0      | A |
| 10 | TIGRP2P141575_rs8840931 | 54085169 | 0 | 0    | 0      | T |
| 10 | BICF2P138769            | 54100058 | A | 0.25 | 0.1429 | G |
| 10 | TIGRP2P141576_rs9157074 | 54107505 | A | 0.5  | 0.5    | G |
| 10 | TIGRP2P141585_rs8882756 | 54149029 | G | 0    | 0      | A |
| 10 | BICF2P1446832           | 54156493 | G | 0    | 0      | A |
| 10 | BICF2P92360             | 54168822 | 0 | 0    | 0      | A |
| 10 | BICF2P679352            | 54181596 | A | 0.25 | 0.1429 | G |
| 10 | BICF2P752473            | 54213138 | 0 | 0    | 0      | G |
| 10 | BICF2S23156246          | 54233423 | G | 0.5  | 0.5    | A |
| 10 | BICF2P414147            | 54239950 | A | 0.25 | 0.1429 | G |
| 10 | TIGRP2P141611_rs9055807 | 54256328 | A | 0.25 | 0.3571 | G |
| 10 | BICF2P1456613           | 54262907 | A | 0    | 0      | G |
| 10 | TIGRP2P141615_rs8841212 | 54275746 | 0 | 0    | 0      | A |

|    |                         |          |   |      |        |   |
|----|-------------------------|----------|---|------|--------|---|
| 10 | BICF2P786592            | 54284449 | G | 0    | 0      | A |
| 10 | BICF2P330900            | 54285965 | C | 0    | 0      | G |
| 10 | TIGRP2P141634_rs9061158 | 54299722 | G | 0.25 | 0.1429 | A |
| 10 | BICF2P874151            | 54303244 | C | 0    | 0      | A |
| 10 | BICF2P271616            | 54317265 | C | 0    | 0      | A |
| 10 | BICF2P268758            | 54331950 | A | 0    | 0      | G |
| 10 | BICF2S23146467          | 54341958 | G | 0.25 | 0.3571 | A |
| 10 | BICF2P1004176           | 54350897 | G | 0    | 0      | A |
| 10 | BICF2P351039            | 54362689 | A | 0    | 0      | G |
| 10 | BICF2P970247            | 54375389 | G | 0    | 0      | A |
| 10 | BICF2S23539723          | 54387081 | A | 0.25 | 0.3571 | G |
| 10 | BICF2S2456524           | 54398893 | 0 | 0    | 0      | G |
| 10 | BICF2P1024077           | 54416040 | A | 0.25 | 0.3571 | C |
| 10 | BICF2P1144849           | 54418886 | G | 0    | 0.2143 | A |
| 10 | BICF2S22944962          | 54434306 | G | 0    | 0.2143 | A |
| 10 | BICF2S23230436          | 54442440 | A | 0.25 | 0.3571 | G |
| 10 | BICF2S23451275          | 54458338 | G | 0    | 0.2143 | A |
| 10 | BICF2S22944619          | 54464388 | A | 0.25 | 0.5714 | G |
| 10 | BICF2P948366            | 54482093 | C | 0    | 0      | G |
| 10 | BICF2P594975            | 54492506 | G | 0.25 | 0.3571 | A |
| 10 | BICF2S23147693          | 54498644 | G | 0    | 0.2143 | A |
| 10 | BICF2P310091            | 54520415 | G | 0.25 | 0.5714 | A |
| 10 | BICF2P1290697           | 54546217 | G | 0    | 0.2143 | A |
| 10 | TIGRP2P141665_rs8874709 | 54559962 | A | 0    | 0.2143 | G |
| 10 | BICF2S23625084          | 54591875 | A | 0    | 0      | G |
| 10 | BICF2P1393909           | 54614024 | 0 | 0    | 0      | A |
| 10 | BICF2P418182            | 54631767 | A | 0    | 0      | G |
| 10 | BICF2P535563            | 54668066 | G | 0.5  | 0.2857 | A |
| 10 | BICF2S23311001          | 54675333 | A | 0    | 0      | T |
| 10 | BICF2P129238            | 54687638 | 0 | 0    | 0      | C |
| 10 | BICF2S22964147          | 54696119 | 0 | 0    | 0      | G |
| 10 | BICF2P1231957           | 54711568 | 0 | 0    | 0      | G |
| 10 | BICF2S2304187           | 54718352 | A | 0.75 | 0.4286 | G |
| 10 | BICF2S23739188          | 54739366 | A | 0.25 | 0.5714 | G |
| 10 | BICF2P934388            | 54741156 | G | 0.5  | 0.2857 | A |
| 10 | BICF2S23651604          | 54758054 | 0 | 0    | 0      | A |
| 10 | BICF2S23651997          | 54765475 | A | 0.25 | 0.3571 | G |
| 10 | BICF2P1424112           | 54774755 | A | 0    | 0      | G |
| 10 | BICF2S23659897          | 54790549 | G | 0.25 | 0.3333 | A |
| 10 | BICF2S2334910           | 54804471 | C | 0.75 | 0.6429 | A |
| 10 | BICF2S22925151          | 54814743 | A | 0.75 | 0.6429 | G |
| 10 | BICF2S23741793          | 54830075 | A | 0    | 0      | G |
| 10 | BICF2P562769            | 54853186 | 0 | 0    | 0      | C |
| 10 | BICF2P1064109           | 54866221 | 0 | 0    | 0      | A |
| 10 | BICF2P322794            | 54873889 | A | 0.25 | 0.3571 | G |
| 10 | BICF2P444457            | 54885400 | A | 0    | 0      | G |
| 10 | BICF2P992493            | 54897772 | 0 | 0    | 0      | A |



|    |                 |          |   |      |        |   |
|----|-----------------|----------|---|------|--------|---|
| 10 | BICF2P617053    | 54918608 | A | 0.75 | 0.4286 | C |
| 10 | BICF2S23520061  | 54928137 | G | 0    | 0.2143 | A |
| 10 | BICF2P1180057   | 54951455 | A | 0    | 0.2143 | G |
| 10 | BICF2P843879    | 54959358 | A | 0.5  | 0.5    | T |
| 10 | BICF2P248346    | 54977421 | 0 | 0    | 0      | A |
| 10 | BICF2P312885    | 54982828 | A | 0.5  | 0.5    | G |
| 10 | BICF2P126909    | 54999142 | A | 0.5  | 0.5    | G |
| 10 | BICF2S2345735   | 55013214 | C | 0.25 | 0.3571 | A |
| 10 | BICF2S2329978   | 55029633 | A | 0.5  | 0.2857 | G |
| 10 | BICF2S23056529  | 55040660 | A | 0.75 | 0.6429 | G |
| 10 | BICF2P627212    | 55057207 | A | 0    | 0      | G |
| 10 | BICF2S23537948  | 55070221 | A | 0.5  | 0.2857 | G |
| 10 | BICF2P1305538   | 55077111 | G | 0.25 | 0.1429 | A |
| 10 | BICF2P1260951   | 55086171 | A | 0.25 | 0.1429 | G |
| 10 | BICF2P1078815   | 55100976 | A | 0    | 0.2143 | G |
| 10 | BICF2G630489428 | 55108298 | 0 | 0    | 0      | A |
| 10 | BICF2S23150541  | 55126488 | G | 0    | 0      | A |
| 10 | BICF2P1366149   | 55135411 | 0 | 0    | 0      | A |
| 10 | BICF2G630489437 | 55156673 | A | 0.25 | 0.5714 | G |
| 10 | BICF2G630489468 | 55166937 | A | 0.75 | 0.6429 | G |
| 10 | BICF2G630489496 | 55178979 | C | 0.75 | 0.8571 | A |
| 10 | BICF2G630489526 | 55195769 | A | 0.5  | 0.5    | C |
| 10 | BICF2G630489531 | 55204569 | G | 0.5  | 0.5    | A |
| 10 | BICF2G630489551 | 55213314 | A | 0.5  | 0.5    | G |
| 10 | BICF2G630489561 | 55225138 | G | 0.25 | 0.1429 | A |
| 10 | BICF2P1389763   | 55238601 | C | 0.25 | 0.3571 | A |
| 10 | BICF2G630489586 | 55250139 | A | 0.25 | 0.1429 | G |
| 10 | BICF2G630489599 | 55258103 | A | 0.25 | 0.1429 | G |
| 10 | BICF2G630489616 | 55275843 | G | 0.5  | 0.5    | A |
| 10 | BICF2G630489641 | 55284700 | A | 0.5  | 0.5    | G |
| 10 | BICF2G630489662 | 55300001 | C | 0.25 | 0.3571 | A |
| 10 | BICF2S23243529  | 55309315 | A | 0    | 0      | G |
| 10 | BICF2G630489693 | 55325813 | A | 0    | 0      | G |
| 10 | BICF2G630489723 | 55331745 | A | 1    | 0.7857 | T |
| 10 | BICF2G630489744 | 55339145 | G | 0.5  | 0.7143 | A |
| 10 | BICF2G630489767 | 55354396 | A | 0.5  | 0.7143 | C |
| 10 | BICF2G630489776 | 55362432 | A | 0    | 0      | G |
| 10 | BICF2G630489805 | 55372960 | A | 0    | 0      | G |
| 10 | BICF2S23158563  | 55393510 | A | 0    | 0      | G |
| 10 | BICF2G630489848 | 55404374 | A | 0    | 0.2143 | G |
| 10 | BICF2G630489865 | 55414758 | A | 0.25 | 0.5714 | G |
| 10 | BICF2G630489877 | 55418737 | G | 0    | 0.2143 | A |
| 10 | BICF2G630489884 | 55432019 | A | 0.25 | 0.3571 | G |
| 10 | BICF2G630489897 | 55441981 | A | NA   | 0.5    | C |
| 10 | BICF2G630489920 | 55453689 | A | 0.25 | 0.3571 | G |
| 10 | BICF2G630489934 | 55476870 | T | 0    | 0.2143 | A |
| 10 | BICF2P890505    | 55501297 | 0 | 0    | 0      | G |

|    |                         |          |   |      |        |   |
|----|-------------------------|----------|---|------|--------|---|
| 10 | BICF2P116818            | 55521115 | 0 | 0    | 0      | A |
| 10 | BICF2S23129312          | 55524241 | A | 0    | 0      | G |
| 10 | BICF2G630489939         | 55555638 | G | 0.5  | 0.2857 | A |
| 10 | BICF2G630489945         | 55560490 | G | 0.5  | 0.7143 | A |
| 10 | BICF2P230843            | 55598563 | 0 | 0    | 0      | A |
| 10 | BICF2P441979            | 55604300 | 0 | 0    | 0      | A |
| 10 | BICF2S23129695          | 55614199 | G | 0.5  | 0.2857 | A |
| 10 | BICF2G630489971         | 55631669 | A | 0.25 | 0.5714 | T |
| 10 | BICF2G630489978         | 55642268 | G | 0.75 | 0.4286 | A |
| 10 | BICF2G630489984         | 55650369 | G | 0.75 | 0.4286 | A |
| 10 | BICF2G630490019         | 55669499 | C | 0    | 0      | A |
| 10 | BICF2G630490028         | 55678470 | A | 0.25 | 0.1429 | G |
| 10 | BICF2S2361874           | 55684457 | 0 | 0    | 0      | A |
| 10 | BICF2S23144879          | 55695814 | C | 0.75 | 0.4286 | A |
| 10 | BICF2G630490046         | 55712404 | C | 0    | 0      | A |
| 10 | BICF2G630490049         | 55730747 | A | 0    | 0.2143 | G |
| 10 | BICF2G630490069         | 55743289 | A | 0    | 0.2143 | C |
| 10 | BICF2G630490085         | 55755220 | A | 0    | 0.2143 | G |
| 10 | BICF2G630490102         | 55763840 | G | 0    | 0      | A |
| 10 | BICF2G630490131         | 55781064 | C | 0    | 0.2143 | A |
| 10 | BICF2G630490139         | 55789283 | G | 0    | 0.2143 | A |
| 10 | BICF2G630490144         | 55800066 | G | 0    | 0.2143 | A |
| 10 | BICF2G630490164         | 55818821 | A | 0.75 | 0.6429 | G |
| 10 | BICF2G630490170         | 55826474 | C | 0.25 | 0.3571 | A |
| 10 | BICF2G630490177         | 55835023 | A | 0.5  | 0.7143 | G |
| 10 | BICF2S24115443          | 55852795 | 0 | 0    | 0      | A |
| 10 | BICF2S23244106          | 55873465 | 0 | 0    | 0      | G |
| 10 | BICF2G630490185         | 55892034 | A | 0.25 | 0.3571 | C |
| 10 | BICF2P436325            | 55906721 | A | 0.75 | 0.7    | C |
| 10 | BICF2P983598            | 55922709 | G | 0.25 | 0.3571 | A |
| 10 | BICF2S23048692          | 55927376 | A | 1    | 1      | C |
| 10 | BICF2P1419702           | 55946874 | 0 | 0    | 0      | A |
| 10 | BICF2S2339273           | 55949062 | G | 0    | 0      | A |
| 10 | BICF2S2445823           | 55969467 | G | 0    | 0      | A |
| 10 | BICF2S23912706          | 55990432 | 0 | 0    | 0      | G |
| 10 | BICF2S23436453          | 56006615 | A | 0    | 0      | T |
| 10 | TIGRP2P141781_rs8864441 | 56061161 | 0 | 0    | 0      | A |
| 10 | BICF2S23334627          | 56074492 | G | 0    | 0      | A |
| 10 | BICF2P779624            | 56086010 | 0 | 0    | 0      | G |
| 10 | BICF2P1214376           | 56104322 | 0 | 0    | 0      | G |
| 10 | BICF2P201206            | 56112760 | A | 0    | 0      | G |
| 10 | BICF2P602500            | 56150177 | 0 | 0    | 0      | A |
| 10 | BICF2S22954384          | 56156269 | A | 0.75 | 0.4286 | G |
| 10 | BICF2P1186737           | 56174907 | A | 0.75 | 0.6429 | G |
| 10 | BICF2G630490188         | 56181921 | G | 0    | 0      | A |
| 10 | BICF2G630490189         | 56199633 | G | 0    | 0.2143 | A |
| 10 | BICF2P632875            | 56203108 | G | 0.25 | 0.3571 | A |

|    |                         |          |   |      |        |   |
|----|-------------------------|----------|---|------|--------|---|
| 10 | BICF2G630490204         | 56218936 | A | 1    | 0.7857 | G |
| 10 | BICF2G630490214         | 56225847 | A | 0    | 0      | C |
| 10 | BICF2P236193            | 56243575 | A | 0    | 0      | G |
| 10 | BICF2G630490226         | 56254773 | G | 0    | 0      | A |
| 10 | BICF2P499017            | 56260782 | G | 0    | 0      | A |
| 10 | BICF2P255683            | 56270146 | A | 0    | 0      | C |
| 10 | BICF2G630490230         | 56288518 | G | 0    | 0      | A |
| 10 | BICF2G630490236         | 56295051 | G | 1    | 0.7857 | A |
| 10 | BICF2G630490248         | 56308123 | C | 0    | 0      | A |
| 10 | BICF2S23217554          | 56316157 | A | 0    | 0      | G |
| 10 | BICF2S2305762           | 56330674 | A | 0    | 0      | G |
| 10 | BICF2P810530            | 56342333 | C | 0    | 0.2143 | A |
| 10 | BICF2P773324            | 56356384 | A | 0    | 0      | G |
| 10 | BICF2G630490256         | 56358035 | G | 0    | 0.2143 | A |
| 10 | BICF2P58807             | 56365773 | G | 0    | 0.2143 | A |
| 10 | BICF2G630490265         | 56375834 | G | 0    | 0      | A |
| 10 | BICF2P441971            | 56386309 | A | 0    | 0.2143 | G |
| 10 | BICF2P1144785           | 56397557 | A | 0    | 0.2143 | G |
| 10 | BICF2P117098            | 56408472 | A | 0    | 0      | G |
| 10 | BICF2P400792            | 56421983 | C | 0    | 0      | A |
| 10 | BICF2P722164            | 56439007 | G | 0    | 0.2143 | A |
| 10 | BICF2S2337109           | 56457443 | A | 0    | 0.2143 | G |
| 10 | BICF2S23726210          | 56470739 | A | 0    | 0      | C |
| 10 | BICF2S23660298          | 56483902 | G | 0    | 0.2143 | A |
| 10 | BICF2P901500            | 56493323 | A | 0    | 0      | G |
| 10 | TIGRP2P141790_rs8973440 | 56505548 | 0 | 0    | 0      | A |
| 10 | BICF2G630490272         | 56517009 | A | 0    | 0.2143 | G |
| 10 | BICF2G630490273         | 56522514 | G | 0    | 0      | A |
| 10 | BICF2G630490277         | 56541729 | A | 0.75 | 0.6429 | G |
| 10 | BICF2G630490294         | 56555388 | G | 0.75 | 0.6429 | A |
| 10 | BICF2G630490306         | 56563857 | A | 0    | 0      | G |
| 10 | BICF2G630490316         | 56595025 | A | 0    | 0      | G |
| 10 | BICF2G630490333         | 56606475 | A | 0    | 0      | C |
| 10 | BICF2S23355436          | 56622532 | C | 0    | 0.2143 | A |
| 10 | BICF2G630490347         | 56634077 | A | 0    | 0      | G |
| 10 | BICF2G630490382         | 56644590 | A | 0    | 0      | G |
| 10 | BICF2G630490391         | 56650002 | C | 0    | 0      | A |
| 10 | BICF2P499786            | 56681588 | C | 1    | 0.7857 | A |
| 10 | BICF2G630490426         | 56685220 | A | 0    | 0      | G |
| 10 | BICF2P426476            | 56697025 | G | 0    | 0      | A |
| 10 | BICF2P506172            | 56706726 | C | 0.25 | 0.3571 | A |
| 10 | BICF2G630490482         | 56719966 | A | 0    | 0      | C |
| 10 | BICF2G630490514         | 56733658 | A | 1    | 0.7857 | G |
| 10 | BICF2G630490528         | 56744735 | G | 0.75 | 0.6429 | A |
| 10 | BICF2S23630218          | 56765708 | G | 0.75 | 1      | A |
| 10 | BICF2P1309422           | 56801037 | A | 0.25 | 0.3571 | G |
| 10 | BICF2P1399597           | 56820658 | A | 0    | 0      | C |

|    |                         |          |   |      |        |   |
|----|-------------------------|----------|---|------|--------|---|
| 10 | BICF2S23412822          | 56825111 | A | 0    | 0.2143 | C |
| 10 | BICF2G630490559         | 56841869 | A | 0    | 0      | G |
| 10 | BICF2G630490570         | 56851003 | G | 0    | 0      | A |
| 10 | BICF2S23332046          | 56867117 | G | 0    | 0      | A |
| 10 | BICF2G630490602         | 56874515 | A | 0    | 0      | G |
| 10 | BICF2G630490622         | 56881401 | A | 0    | 0      | G |
| 10 | BICF2G630490649         | 56891092 | A | 0    | 0      | G |
| 10 | BICF2G630490676         | 56903014 | G | 0    | 0.2143 | A |
| 10 | BICF2G630490682         | 56919323 | A | 0    | 0      | G |
| 10 | BICF2G630490693         | 56925614 | A | 0    | 0      | G |
| 10 | BICF2G630490720         | 56942501 | G | 0    | 0      | A |
| 10 | BICF2G630490734         | 56951503 | A | 0    | 0.2143 | G |
| 10 | BICF2G630490757         | 56959705 | G | 0    | 0      | A |
| 10 | BICF2G630490761         | 56978845 | A | 0.25 | 0.3571 | G |
| 10 | BICF2P939888            | 56982895 | 0 | 0    | 0      | G |
| 10 | BICF2P647892            | 57005139 | A | 0.25 | 0.5714 | G |
| 10 | BICF2P118721            | 57019027 | G | 0.75 | 0.4286 | A |
| 10 | BICF2G630490770         | 57033042 | G | 0    | 0.1667 | A |
| 10 | BICF2G630490783         | 57046139 | A | 0.75 | 0.4286 | G |
| 10 | BICF2S23413557          | 57059175 | A | 0    | 0      | C |
| 10 | BICF2G630490814         | 57065610 | G | 0    | 0      | A |
| 10 | BICF2G630490844         | 57080281 | A | 0.25 | 0.3571 | G |
| 10 | BICF2G630490864         | 57089240 | A | 0.25 | 0.5714 | G |
| 10 | BICF2G630490877         | 57103657 | A | 0.25 | 0.5714 | C |
| 10 | BICF2G630490885         | 57110786 | G | 0.25 | 0.3571 | A |
| 10 | BICF2G630490893         | 57121914 | A | 0    | 0      | G |
| 10 | BICF2P1009145           | 57133688 | A | 0    | 0      | C |
| 10 | BICF2P269981            | 57144580 | A | 0    | 0      | G |
| 10 | BICF2S23140478          | 57165095 | A | 0.25 | 0.5714 | G |
| 10 | TIGRP2P141811_rs8579010 | 57176643 | 0 | 0    | 0      | A |
| 10 | BICF2G630490901         | 57181947 | A | 0    | 0      | C |
| 10 | BICF2P823316            | 57199100 | A | 0    | 0      | G |
| 10 | BICF2G630490912         | 57204668 | C | 0    | 0      | A |
| 10 | BICF2P716479            | 57222825 | A | 0    | 0      | G |
| 10 | BICF2G630490923         | 57230313 | G | 0    | 0      | A |
| 10 | BICF2G630490933         | 57236177 | A | 0    | 0      | T |
| 10 | BICF2G630490942         | 57240610 | A | 0    | 0      | G |
| 10 | BICF2G630490968         | 57266436 | C | 0    | 0      | A |
| 10 | BICF2G630490974         | 57271096 | G | 0    | 0      | A |
| 10 | BICF2S23048750          | 57287021 | C | 0    | 0      | A |
| 10 | BICF2P481424            | 57288133 | A | 0    | 0      | G |
| 10 | BICF2G630490981         | 57293516 | G | 0    | 0      | A |
| 10 | BICF2G630491024         | 57314998 | C | 0    | 0      | A |
| 10 | BICF2G630491062         | 57348154 | G | 0    | 0.2143 | A |
| 10 | BICF2G630491066         | 57353121 | A | 0.25 | 0.1429 | G |
| 10 | BICF2G630491092         | 57362025 | A | 0.25 | 0.1429 | G |
| 10 | BICF2G630491119         | 57383571 | A | 0.75 | 0.6429 | G |

|    |                         |          |   |      |        |   |
|----|-------------------------|----------|---|------|--------|---|
| 10 | BICF2G630491120         | 57384581 | G | 0.75 | 0.6429 | C |
| 10 | BICF2G630491136         | 57395358 | G | 0    | 0      | A |
| 10 | BICF2G630491191         | 57414624 | A | 1    | 1      | G |
| 10 | BICF2G630491222         | 57436628 | A | 0    | 0      | G |
| 10 | BICF2G630491251         | 57448166 | A | 0    | 0      | G |
| 10 | BICF2P664339            | 57461690 | G | 0    | 0.2143 | A |
| 10 | TIGRP2P141822_rs9107462 | 57475098 | 0 | 0    | 0      | G |
| 10 | BICF2G630491270         | 57477164 | G | 1    | 0.7857 | A |
| 10 | BICF2G630491296         | 57488609 | A | 0.5  | 0.5    | G |
| 10 | BICF2G630491311         | 57501889 | A | 0.5  | 0.5    | C |
| 10 | BICF2G630491325         | 57512624 | A | 0.5  | 0.5    | G |
| 10 | BICF2G630491343         | 57526725 | A | 0    | 0      | G |
| 10 | BICF2G630491354         | 57534994 | A | 0.5  | 0.5    | C |
| 10 | BICF2G630491388         | 57568919 | G | 1    | 0.7857 | A |
| 10 | BICF2G630491396         | 57577664 | G | 0    | 0.2143 | A |
| 10 | BICF2P896395            | 57586880 | G | 1    | 1      | A |
| 10 | BICF2G630491416         | 57594268 | A | 0    | 0      | G |
| 10 | BICF2P1118128           | 57604532 | G | 0    | 0      | A |
| 10 | BICF2G630491467         | 57624496 | G | 1    | 0.7857 | A |
| 10 | BICF2G630491473         | 57630035 | A | 0    | 0      | G |
| 10 | BICF2S23112761          | 57640816 | A | 0    | 0      | G |
| 10 | BICF2P406490            | 57650543 | A | 1    | 1      | G |
| 10 | BICF2G630491516         | 57677062 | G | 0    | 0.2143 | A |
| 10 | BICF2G630491543         | 57685226 | G | 0    | 0      | A |
| 10 | BICF2G630491612         | 57706780 | G | 0.5  | 0.5    | A |
| 10 | BICF2G630491624         | 57729486 | A | 0.5  | 0.5    | C |
| 10 | BICF2G630491634         | 57740971 | G | 1    | 0.7857 | A |
| 10 | BICF2G630491652         | 57749843 | A | 0    | 0.2143 | G |
| 10 | BICF2P1249817           | 57759756 | A | 0.5  | 0.5    | G |
| 10 | BICF2G630491658         | 57772884 | G | 0.5  | 0.5    | A |
| 10 | BICF2G630491688         | 57800641 | C | 0.5  | 0.5    | A |
| 10 | BICF2G630491701         | 57811335 | G | 0.5  | 0.5    | A |
| 10 | BICF2P270945            | 57825605 | A | 0.5  | 0.5    | G |
| 10 | BICF2G630491721         | 57835151 | G | 0.5  | 0.5    | A |
| 10 | BICF2G630491727         | 57850227 | A | 0.5  | 0.5    | G |
| 10 | BICF2G630491731         | 57865340 | A | 0.5  | 0.5    | G |
| 10 | BICF2G630491736         | 57879171 | A | 0.5  | 0.5    | G |
| 10 | BICF2G630491741         | 57895083 | A | 0.5  | 0.5    | G |
| 10 | BICF2G630491744         | 57906064 | G | 0.75 | 0.7143 | A |
| 10 | BICF2G630491746         | 57923830 | A | 0.5  | 0.5    | T |
| 10 | BICF2P784462            | 57936636 | A | 0    | 0      | G |
| 10 | BICF2S22922039          | 57947997 | G | 0.75 | 0.75   | A |
| 10 | BICF2G630491757         | 57950063 | A | 0.25 | 0.2143 | G |
| 10 | BICF2G630491762         | 57988897 | G | 0.25 | 0.2857 | A |
| 10 | BICF2G630491764         | 57996937 | G | 0    | 0      | A |
| 10 | BICF2G630491770         | 58010316 | G | 0.25 | 0.2857 | A |
| 10 | BICF2G630491778         | 58018214 | A | 0    | 0      | G |

|    |                 |          |   |      |        |   |
|----|-----------------|----------|---|------|--------|---|
| 10 | BICF2G630491784 | 58029905 | G | 0    | 0      | A |
| 10 | BICF2G630491788 | 58041409 | C | 0    | 0      | A |
| 10 | BICF2G630491796 | 58071141 | A | 0    | 0      | G |
| 10 | BICF2S23550301  | 58075689 | A | 0.25 | 0.2857 | G |
| 10 | BICF2G630491801 | 58088621 | G | 0    | 0      | A |
| 10 | BICF2G630491805 | 58099816 | A | 0.5  | 0.5714 | G |
| 10 | BICF2G630491811 | 58110655 | T | 0    | 0      | A |
| 10 | BICF2P1438819   | 58123912 | 0 | 0    | 0      | A |
| 10 | BICF2P817400    | 58138781 | 0 | 0    | 0      | A |
| 10 | BICF2P491965    | 58144352 | 0 | 0    | 0      | G |
| 10 | BICF2S23537914  | 58173780 | C | 0.25 | 0.2857 | A |
| 10 | BICF2P771477    | 58186740 | 0 | 0    | 0      | A |
| 10 | BICF2G630491819 | 58199458 | T | 0.5  | 0.6429 | A |
| 10 | BICF2G630491824 | 58202438 | G | 0.25 | 0.3571 | A |
| 10 | BICF2G630491835 | 58217070 | G | 0.25 | 0.2143 | A |
| 10 | BICF2S23044988  | 58225158 | G | 0.25 | 0.2857 | A |
| 10 | BICF2G630491871 | 58238177 | A | 0.5  | 0.6429 | G |
| 10 | BICF2G630491886 | 58250922 | G | 0.25 | 0.3571 | A |
| 10 | BICF2S23412215  | 58261160 | A | 0.25 | 0.2857 | C |
| 10 | BICF2G630491908 | 58275016 | A | 0.25 | 0.3571 | C |
| 10 | BICF2G630491921 | 58287041 | G | 0.5  | 0.3571 | A |
| 10 | BICF2P664664    | 58301281 | G | 0.5  | 0.3571 | C |
| 10 | BICF2S23342157  | 58310092 | A | 0.25 | 0.2857 | G |
| 10 | BICF2G630491939 | 58317254 | A | 0.25 | 0.3571 | G |
| 10 | BICF2G630491956 | 58328326 | A | 0.5  | 0.6667 | G |
| 10 | BICF2S23355711  | 58362341 | G | 0.25 | 0.2857 | A |
| 10 | BICF2P98601     | 58376546 | A | 0.5  | 0.3571 | G |
| 10 | BICF2P335070    | 58390182 | G | 0.5  | 0.3571 | A |
| 10 | BICF2G630491964 | 58406036 | G | 0    | 0      | A |
| 10 | BICF2P750361    | 58418297 | A | 0    | 0      | G |
| 10 | BICF2P1384236   | 58424564 | C | 0    | 0      | A |
| 10 | BICF2G630491982 | 58442674 | G | 0.5  | 0.6429 | A |
| 10 | BICF2G630491987 | 58443278 | G | 0.5  | 0.3571 | A |
| 10 | BICF2G630492003 | 58456666 | G | 0.25 | 0.2857 | A |
| 10 | BICF2P593837    | 58469044 | 0 | 0    | 0      | A |
| 10 | BICF2G630492004 | 58484252 | A | 0.75 | 0.7143 | G |
| 10 | BICF2G630492022 | 58500421 | A | 0.75 | 0.7143 | G |
| 10 | BICF2G630492024 | 58501054 | C | 0.25 | 0.2857 | A |
| 10 | BICF2G630492039 | 58520322 | A | 0.25 | 0.2857 | C |
| 10 | BICF2G630492047 | 58537735 | A | 0.25 | 0.2857 | G |
| 10 | BICF2P1243874   | 58556734 | A | 0.75 | 0.7143 | G |
| 10 | BICF2P593069    | 58559157 | G | 0    | 0      | A |
| 10 | BICF2G630492081 | 58570751 | G | 0.25 | 0.2857 | A |
| 10 | BICF2P1180852   | 58588953 | G | 0.25 | 0.2857 | A |
| 10 | BICF2G630492103 | 58589196 | A | 0    | 0      | C |
| 10 | BICF2G630492106 | 58598270 | G | 0    | 0      | A |
| 10 | BICF2G630492108 | 58604495 | G | 0    | 0      | A |

|    |                         |          |   |      |        |   |
|----|-------------------------|----------|---|------|--------|---|
| 10 | BICF2G630492116         | 58620835 | G | 0.25 | 0.2857 | A |
| 10 | BICF2G630492135         | 58630360 | G | 0.25 | 0.2857 | A |
| 10 | BICF2G630492151         | 58635986 | A | 0.25 | 0.2857 | G |
| 10 | BICF2G630492157         | 58641713 | A | 0    | 0      | G |
| 10 | BICF2G630492166         | 58650185 | A | 0.25 | 0.3333 | G |
| 10 | BICF2G630492187         | 58667130 | A | 0.25 | 0.2857 | G |
| 10 | BICF2P1429399           | 58673713 | A | 0.25 | 0.2857 | G |
| 10 | BICF2G630492206         | 58680393 | A | 0.25 | 0.2857 | G |
| 10 | BICF2G630492217         | 58688936 | C | 0    | 0      | A |
| 10 | BICF2G630492218         | 58690740 | C | 0    | 0      | A |
| 10 | BICF2G630492221         | 58697114 | A | 0    | 0      | G |
| 10 | BICF2G630492235         | 58709607 | A | 0    | 0      | G |
| 10 | BICF2G630492278         | 58731785 | A | 0    | 0      | G |
| 10 | BICF2G630492301         | 58744606 | A | 0.25 | 0.2857 | G |
| 10 | BICF2P342565            | 58769300 | 0 | 0    | 0      | A |
| 10 | TIGRP2P141867_rs9062868 | 58783898 | 0 | 0    | 0      | G |
| 10 | BICF2G630492307         | 58833108 | A | 0    | 0      | G |
| 10 | BICF2P929637            | 58841564 | 0 | 0    | 0      | A |
| 10 | BICF2G630492310         | 58871018 | G | 0.25 | 0.2857 | A |
| 10 | BICF2G630492313         | 58883680 | A | 0.25 | 0.2857 | G |
| 10 | BICF2P6814              | 58900211 | A | 0.75 | 0.7143 | T |
| 10 | BICF2S23328929          | 58905045 | G | 0.75 | 0.7143 | A |
| 10 | BICF2S23521975          | 58923672 | A | 0.25 | 0.2857 | G |
| 10 | BICF2P817210            | 58927703 | G | 0    | 0      | A |
| 10 | BICF2P451531            | 58938521 | A | 0    | 0      | G |
| 10 | BICF2P30031             | 58950540 | A | 0    | 0      | G |
| 10 | BICF2P1237253           | 58963489 | C | 0    | 0      | G |
| 10 | BICF2P734829            | 58988272 | 0 | 0    | 0      | A |
| 10 | BICF2P1121326           | 58999172 | A | 0.75 | 0.7143 | G |
| 10 | BICF2G630492348         | 59009283 | A | 1    | 1      | G |
| 10 | BICF2G630492379         | 59034638 | A | 0.5  | 0.5714 | G |
| 10 | BICF2G630492383         | 59045568 | G | 0    | 0      | A |
| 10 | BICF2G630492393         | 59060586 | G | 0    | 0      | A |
| 10 | BICF2S23552704          | 59068238 | 0 | 0    | 0      | C |
| 10 | BICF2G630492403         | 59081099 | G | 0.5  | 0.5714 | A |
| 10 | BICF2G630492424         | 59096143 | G | 0.5  | 0.5714 | A |
| 10 | BICF2G630492428         | 59099312 | A | 0.5  | 0.5714 | G |
| 10 | BICF2G630492451         | 59117214 | A | 0.5  | 0.5714 | G |
| 10 | BICF2G630492463         | 59129371 | G | 0.5  | 0.5714 | A |
| 10 | BICF2G630492481         | 59139779 | G | 0    | 0      | A |
| 10 | BICF2G630492493         | 59145612 | C | 0    | 0      | A |
| 10 | BICF2P1103044           | 59156964 | G | 0.25 | 0.2857 | A |
| 10 | BICF2G630492526         | 59176850 | A | 0    | 0      | G |
| 10 | BICF2G630492527         | 59180359 | A | 0    | 0      | C |
| 10 | BICF2G630492535         | 59193460 | G | 0    | 0      | A |
| 10 | BICF2P302806            | 59210480 | A | 0.5  | 0.5714 | C |
| 10 | BICF2S22942869          | 59217472 | A | 0.5  | 0.5714 | G |

|    |                |          |   |      |        |   |
|----|----------------|----------|---|------|--------|---|
| 10 | BICF2P1443299  | 59225274 | A | 0.5  | 0.5714 | G |
| 10 | BICF2P871346   | 59247563 | 0 | 0    | 0      | A |
| 10 | BICF2P937713   | 59265374 | A | 0.5  | 0.4286 | G |
| 10 | BICF2P1133063  | 59280328 | A | 0.25 | 0.2857 | C |
| 10 | BICF2S23441191 | 59282920 | A | 0.5  | 0.5714 | G |
| 10 | BICF2P44198    | 59305963 | A | 0.25 | 0.1429 | C |
| 10 | BICF2P1113481  | 59329957 | A | 0    | 0      | G |
| 10 | BICF2P1049158  | 59340953 | A | 0    | 0      | C |
| 10 | BICF2P249846   | 59355412 | G | 0.5  | 0.5714 | A |
| 10 | BICF2P1418961  | 59368167 | A | 0    | 0      | G |
| 10 | BICF2P118130   | 59376505 | G | 0    | 0      | A |
| 10 | BICF2S22920458 | 59391859 | A | 0    | 0      | G |
| 10 | BICF2P1219271  | 59400315 | A | 0.25 | 0.2857 | G |
| 10 | BICF2P1059030  | 59413430 | A | 0.25 | 0.2857 | C |
| 10 | BICF2P703500   | 59420631 | G | 0.25 | 0.2857 | A |
| 10 | BICF2P191987   | 59426694 | A | 0.25 | 0.2857 | G |
| 10 | BICF2P510199   | 59434783 | G | 0    | 0      | A |
| 10 | BICF2P1032819  | 59448449 | G | 0    | 0      | A |
| 10 | BICF2P559445   | 59455583 | A | 0    | 0      | C |
| 10 | BICF2S23343825 | 59476642 | A | 0    | 0      | G |
| 10 | BICF2P1265074  | 59524313 | G | 0.5  | 0.4286 | A |
| 10 | BICF2P1115469  | 59536935 | 0 | 0    | 0      | G |
| 10 | BICF2S23140067 | 59547687 | A | 0.5  | 0.4286 | C |
| 10 | BICF2S23229873 | 59568369 | G | 0.5  | 0.4286 | A |
| 10 | BICF2P271194   | 59571633 | A | 0.5  | 0.4286 | G |
| 10 | BICF2P284540   | 59592516 | 0 | 0    | 0      | A |
| 10 | BICF2P632499   | 59600853 | 0 | 0    | 0      | A |
| 10 | BICF2P388799   | 59614818 | A | 0.5  | 0.4286 | G |
| 10 | BICF2P1124607  | 59617984 | G | 0    | 0      | A |
| 10 | BICF2P308051   | 59628196 | A | 0    | 0      | G |
| 10 | BICF2P488444   | 59643503 | A | 0    | 0      | G |
| 10 | BICF2P177374   | 59653166 | A | 0    | 0      | G |
| 10 | BICF2S23130185 | 59670840 | T | 0.5  | 0.4286 | A |
| 10 | BICF2P971531   | 59681831 | C | 0.5  | 0.4286 | A |
| 10 | BICF2P1267670  | 59691412 | G | 0.5  | 0.5    | A |
| 10 | BICF2P194647   | 59725550 | A | 0.25 | 0.1429 | G |
| 10 | BICF2P924544   | 59731609 | A | 0    | 0      | G |
| 10 | BICF2P465084   | 59740614 | A | 0    | 0      | G |
| 10 | BICF2P1310973  | 59749107 | G | NA   | 0.5    | A |
| 10 | BICF2S23148142 | 59769073 | A | 0.5  | 0.5714 | G |
| 10 | BICF2P233551   | 59778126 | A | 0.25 | 0.1429 | G |
| 10 | BICF2P788947   | 59796849 | A | 0    | 0      | G |
| 10 | BICF2P184479   | 59801268 | A | 0.25 | 0.1429 | G |
| 10 | BICF2S23052804 | 59817490 | A | 0    | 0      | G |
| 10 | BICF2P566462   | 59846011 | A | 0.5  | 0.4286 | G |
| 10 | BICF2P1096664  | 59853625 | G | 0.25 | 0.2857 | A |
| 10 | BICF2S23220227 | 59870049 | C | 0.25 | 0.2857 | A |



|    |                         |          |   |      |        |   |
|----|-------------------------|----------|---|------|--------|---|
| 10 | BICF2S23155665          | 59891933 | A | 0.75 | 0.7143 | G |
| 10 | BICF2P249878            | 59903312 | A | 0.5  | 0.4286 | C |
| 10 | BICF2P569714            | 59912518 | G | 0.25 | 0.2857 | A |
| 10 | BICF2P285843            | 59915184 | A | 0    | 0      | G |
| 10 | BICF2P356295            | 59935591 | C | 0    | 0      | G |
| 10 | BICF2P1411839           | 59948159 | A | 0.75 | 0.7143 | G |
| 10 | BICF2P1411833           | 59950793 | A | 0    | 0      | G |
| 10 | BICF2P1058095           | 59969396 | G | 0.75 | 0.8    | A |
| 10 | BICF2P1445407           | 59982992 | G | 0.75 | 0.75   | A |
| 10 | BICF2P1445405           | 59983859 | T | 0.75 | 0.7143 | A |
| 10 | BICF2P640724            | 59984676 | A | 0.75 | 0.7143 | G |
| 10 | BICF2S23326734          | 60001269 | A | 0.25 | 0.1429 | G |
| 10 | BICF2P705846            | 60013840 | G | 0.75 | 0.8571 | A |
| 10 | BICF2P1329172           | 60028156 | A | 0.5  | 0.5714 | G |
| 10 | BICF2S235965            | 60034691 | 0 | 0    | 0      | G |
| 10 | TIGRP2P141890_rs8784107 | 60052438 | 0 | 0    | 0      | G |
| 10 | BICF2P368947            | 60070786 | 0 | 0    | 0      | A |
| 10 | BICF2S23026439          | 60079872 | A | 0.5  | 0.5714 | T |
| 10 | BICF2P209236            | 60089886 | 0 | 0    | 0      | C |
| 10 | BICF2P338235            | 60101001 | A | 0.75 | 0.8571 | C |
| 10 | BICF2P824387            | 60113642 | A | 0.75 | 0.8571 | G |
| 10 | BICF2P939795            | 60123682 | G | 0    | 0      | A |
| 10 | BICF2P347211            | 60157738 | 0 | 0    | 0      | A |
| 10 | BICF2S23547546          | 60184457 | G | 0    | 0      | A |
| 10 | BICF2S23513579          | 60206370 | A | 1    | 1      | G |
| 10 | BICF2P1015852           | 60232142 | G | 1    | 1      | A |
| 10 | BICF2S237368            | 60240301 | G | 0.25 | 0.1429 | A |
| 10 | BICF2P949743            | 60257668 | 0 | 0    | 0      | A |
| 10 | BICF2P1125692           | 60271487 | 0 | 0    | 0      | A |
| 10 | BICF2P903947            | 60304159 | C | 0    | 0      | A |
| 10 | BICF2P1424415           | 60333397 | C | 0.25 | 0.1429 | A |
| 10 | BICF2P493344            | 60349763 | A | 0    | 0      | G |
| 10 | BICF2P76247             | 60355103 | C | 0.25 | 0.1429 | A |
| 10 | BICF2P269358            | 60371049 | C | 0    | 0      | A |
| 10 | BICF2S23432259          | 60386377 | G | 0    | 0      | A |
| 10 | BICF2P216368            | 60387242 | C | 0    | 0      | G |
| 10 | BICF2S23438608          | 60399808 | G | 0.25 | 0.1429 | A |
| 10 | BICF2P342852            | 60415501 | G | 0.25 | 0.1429 | A |
| 10 | BICF2P1368107           | 60421330 | G | 0    | 0      | A |
| 10 | BICF2S23315433          | 60456532 | A | 0    | 0      | G |
| 10 | BICF2S23426508          | 60476168 | G | 0    | 0      | C |
| 10 | TIGRP2P141895_rs8715676 | 60488079 | 0 | 0    | 0      | A |
| 10 | BICF2P955954            | 60504906 | 0 | 0    | 0      | A |
| 10 | BICF2S22941762          | 60513054 | G | 0    | 0      | A |
| 10 | BICF2S22962407          | 60530455 | G | 0    | 0      | A |
| 10 | BICF2S23110665          | 60567960 | A | 0    | 0      | G |
| 10 | BICF2P383458            | 60574693 | 0 | 0    | 0      | C |

|    |                |          |   |      |        |   |
|----|----------------|----------|---|------|--------|---|
| 10 | BICF2P323975   | 60621515 | A | 0    | 0      | C |
| 10 | BICF2S2346750  | 60674403 | G | 0.75 | 0.8571 | A |
| 10 | BICF2P798823   | 60692450 | 0 | 0    | 0      | A |
| 10 | BICF2P1032425  | 60705018 | A | 0    | 0      | T |
| 10 | BICF2P673189   | 60739437 | A | 1    | 1      | G |
| 10 | BICF2S22936876 | 60763302 | G | 0    | 0      | A |
| 10 | BICF2P1384039  | 60770352 | G | 0.75 | 0.8571 | A |
| 10 | BICF2P195903   | 60789727 | A | 0.75 | 0.8571 | G |
| 10 | BICF2P839127   | 60808346 | G | 0.75 | 0.8571 | A |
| 10 | BICF2P304794   | 60816151 | A | 0.75 | 0.8571 | C |
| 10 | BICF2S22957331 | 60827926 | 0 | 0    | 0      | C |
| 10 | BICF2P1180115  | 60843906 | 0 | 0    | 0      | G |
| 10 | BICF2S23512754 | 60850636 | G | 0.25 | 0.1429 | A |
| 10 | BICF2S23322059 | 60861972 | G | 0.25 | 0.1429 | C |
| 10 | BICF2S23333629 | 60879410 | A | 0.25 | 0.1429 | G |
| 10 | BICF2P114700   | 60892466 | 0 | 0    | 0      | A |
| 10 | BICF2S2364198  | 60923087 | A | 1    | 1      | G |
| 10 | BICF2P822629   | 60928007 | G | 1    | 1      | A |
| 10 | BICF2P1180307  | 60939742 | G | 1    | 1      | A |
| 10 | BICF2P1135023  | 60951568 | A | 0    | 0      | G |
| 10 | BICF2S23452001 | 60963119 | G | 0    | 0      | A |
| 10 | BICF2S23315519 | 60974590 | G | 0    | 0      | A |
| 10 | BICF2P322412   | 60990872 | 0 | 0    | 0      | A |
| 10 | BICF2S2366163  | 61000220 | A | 0.75 | 0.8571 | G |
| 10 | BICF2P1092634  | 61009458 | G | 0    | 0      | A |
| 10 | BICF2S23137618 | 61029461 | G | 1    | 1      | A |
| 10 | BICF2P1370043  | 61040745 | A | 0    | 0      | G |
| 10 | BICF2P200400   | 61054834 | A | 0    | 0      | G |
| 10 | BICF2P667208   | 61067454 | G | 1    | 1      | A |
| 10 | BICF2P217147   | 61087064 | 0 | 0    | 0      | A |
| 10 | BICF2S23038456 | 61089680 | A | 0    | 0      | G |
| 10 | BICF2P963969   | 61102510 | A | 0.25 | 0.1429 | G |
| 10 | BICF2P1315790  | 61114427 | A | 0.25 | 0.1429 | G |
| 10 | BICF2P780308   | 61133677 | G | 1    | 1      | A |
| 10 | BICF2P1287702  | 61138682 | A | 0    | 0      | G |
| 10 | BICF2P602338   | 61146139 | G | 1    | 1      | A |
| 10 | BICF2P989259   | 61166355 | A | 1    | 1      | G |
| 10 | BICF2P885601   | 61176672 | 0 | 0    | 0      | A |
| 10 | BICF2P620024   | 61182320 | A | 0    | 0      | C |
| 10 | BICF2P689842   | 61213918 | A | 0    | 0      | G |
| 10 | BICF2P447041   | 61217475 | A | 0.75 | 0.8571 | G |
| 10 | BICF2P676575   | 61247087 | C | 1    | 0.8571 | A |
| 10 | BICF2P157574   | 61254217 | G | 1    | 1      | A |
| 10 | BICF2P1132919  | 61270872 | G | 1    | 1      | A |
| 10 | BICF2P877345   | 61280357 | 0 | 0    | 0      | A |
| 10 | BICF2P409743   | 61288767 | G | 0.25 | 0.1429 | A |
| 10 | BICF2P56217    | 61297572 | A | 0.25 | 0.1429 | G |

|    |                |          |   |      |         |   |
|----|----------------|----------|---|------|---------|---|
| 10 | BICF2S23752799 | 61318742 | G | 0    | 0       | A |
| 10 | BICF2P1206583  | 61331614 | A | 0    | 0       | G |
| 10 | BICF2P114573   | 61337953 | G | 0    | 0       | A |
| 10 | BICF2P257923   | 61341437 | G | 0    | 0       | A |
| 10 | BICF2S22942051 | 61344927 | G | 0.75 | 0.9286  | A |
| 10 | BICF2P884502   | 61355044 | A | 1    | 0.9286  | C |
| 10 | BICF2P1067630  | 61376821 | A | 0    | 0       | G |
| 10 | BICF2S23325450 | 61392681 | G | 0.75 | 0.9286  | A |
| 10 | BICF2P1274933  | 61402302 | A | 0    | 0       | G |
| 10 | BICF2P281193   | 61416573 | G | 0.75 | 0.9286  | A |
| 10 | BICF2P1390376  | 61423338 | G | 1    | 0.9286  | A |
| 10 | BICF2P1244041  | 61438911 | A | 0.75 | 0.9286  | G |
| 10 | BICF2P1350421  | 61445633 | G | 0.75 | 0.9286  | A |
| 10 | BICF2P277574   | 61459238 | G | 0.75 | 0.9286  | A |
| 10 | BICF2P1310110  | 61469898 | G | 0    | 0       | A |
| 10 | BICF2P77977    | 61486199 | 0 | 0    | 0       | A |
| 10 | BICF2P871681   | 61498214 | A | 0.25 | 0.07143 | G |
| 10 | BICF2P825934   | 61502746 | C | 0.75 | 0.9286  | A |
| 10 | BICF2P556582   | 61520100 | G | 0    | 0       | A |
| 10 | BICF2P180182   | 61534567 | G | 0    | 0       | A |
| 10 | BICF2P1456154  | 61541606 | A | 0.75 | 0.9286  | C |
| 10 | BICF2P1373615  | 61566611 | A | 0.75 | 0.9286  | G |
| 10 | BICF2P864923   | 61574601 | G | 0.75 | 0.9286  | A |
| 10 | BICF2P202673   | 61586449 | A | 1    | 1       | C |
| 10 | BICF2S23554378 | 61594335 | G | 0.25 | 0.07143 | A |
| 10 | BICF2P901889   | 61622375 | C | 0.25 | 0.07143 | A |
| 10 | BICF2P486834   | 61642076 | G | 0.25 | 0.07143 | A |
| 10 | BICF2S23520070 | 61655861 | G | 0    | 0       | A |
| 10 | BICF2P826929   | 61666519 | C | 0.75 | 0.9286  | A |
| 10 | BICF2P190979   | 61695262 | 0 | 0    | 0       | G |
| 10 | BICF2S23536384 | 61701014 | G | 0.75 | 0.9286  | A |
| 10 | BICF2P564567   | 61715028 | A | 0.75 | 0.9286  | G |
| 10 | BICF2S22954327 | 61722313 | T | 0.75 | 0.9286  | A |
| 10 | BICF2P344630   | 61735666 | 0 | 0    | 0       | A |
| 10 | BICF2P154999   | 61759033 | G | 0.75 | 0.9286  | A |
| 10 | BICF2P3673     | 61780896 | G | 0    | 0       | A |
| 10 | BICF2P763826   | 61794980 | G | 0.25 | 0.07143 | A |
| 10 | BICF2S237142   | 61803966 | 0 | 0    | 0       | A |
| 10 | BICF2S23119242 | 61814336 | G | 0.25 | 0.07143 | A |
| 10 | BICF2S23545618 | 61830526 | A | 0    | 0       | C |
| 10 | BICF2S23022674 | 61838885 | G | 0.25 | 0.07143 | A |
| 10 | BICF2P419288   | 61858412 | A | 0    | 0       | G |
| 10 | BICF2S23060690 | 61866956 | A | 1    | 1       | G |
| 10 | BICF2P538011   | 61878046 | G | 0    | 0       | A |
| 10 | BICF2P775688   | 61887367 | 0 | 0    | 0       | A |
| 10 | BICF2S23517127 | 61914795 | G | 1    | 1       | A |
| 10 | BICF2S2314027  | 61927759 | A | 0    | 0       | G |

|    |                |          |   |      |         |   |
|----|----------------|----------|---|------|---------|---|
| 10 | BICF2S23426365 | 61941743 | A | 0.75 | 0.9286  | C |
| 10 | BICF2P1242609  | 61954703 | A | 0    | 0       | G |
| 10 | BICF2P602846   | 61962487 | A | 0    | 0       | G |
| 10 | BICF2P1215154  | 61977066 | A | 0    | 0       | G |
| 10 | BICF2P729624   | 61995287 | G | 0    | 0       | A |
| 10 | BICF2P1094001  | 62001973 | A | 0    | 0       | G |
| 10 | BICF2P989551   | 62008407 | G | 0    | 0       | A |
| 10 | BICF2P471410   | 62019745 | A | 0    | 0       | G |
| 10 | BICF2P1005445  | 62038950 | A | 0    | 0       | G |
| 10 | BICF2P669988   | 62052622 | A | 0    | 0       | G |
| 10 | BICF2P293287   | 62061877 | A | 0.25 | 0.07143 | G |
| 10 | BICF2P854199   | 62076872 | A | 0    | 0       | G |
| 10 | BICF2P812977   | 62094182 | 0 | 0    | 0       | C |
| 10 | BICF2P56391    | 62103540 | A | 0.25 | 0.07143 | G |
| 10 | BICF2P171592   | 62115508 | 0 | 0    | 0       | A |
| 10 | BICF2P528031   | 62123233 | G | 0.25 | 0.07143 | A |
| 10 | BICF2P1061263  | 62140575 | 0 | 0    | 0       | C |
| 10 | BICF2S23157935 | 62149220 | G | 0.25 | 0.07143 | A |
| 10 | BICF2P1183525  | 62158483 | 0 | 0    | 0       | A |
| 10 | BICF2S2312442  | 62172392 | G | 0.25 | 0.07143 | A |
| 10 | BICF2P449768   | 62185256 | 0 | 0    | 0       | G |
| 10 | BICF2S22945216 | 62197260 | A | 0.25 | 0.07143 | G |
| 10 | BICF2P704267   | 62206038 | 0 | 0    | 0       | A |
| 10 | BICF2S23525023 | 62229693 | 0 | 0    | 0       | G |
| 10 | BICF2P499864   | 62238131 | G | 0.25 | 0.07143 | A |
| 10 | BICF2P1114492  | 62254692 | A | 1    | 1       | G |
| 10 | BICF2P710267   | 62266375 | G | 1    | 1       | A |
| 10 | BICF2P536324   | 62280321 | A | 0.25 | 0.07143 | G |
| 10 | BICF2P11606    | 62288672 | G | 1    | 1       | A |
| 10 | BICF2P709954   | 62297315 | A | 0    | 0       | G |
| 10 | BICF2S23259009 | 62312419 | A | 0    | 0       | G |
| 10 | BICF2S23737269 | 62329284 | G | 0.75 | 0.9286  | A |
| 10 | BICF2P1195405  | 62335167 | A | 0    | 0       | G |
| 10 | BICF2P103551   | 62350808 | G | 0    | 0       | C |
| 10 | BICF2S23017965 | 62361817 | A | 0.75 | 0.9286  | G |
| 10 | BICF2P552585   | 62381168 | A | 0.25 | 0.07143 | G |
| 10 | BICF2P576356   | 62387870 | A | 0.25 | 0.07143 | G |
| 10 | BICF2S2339076  | 62400139 | 0 | 0    | 0       | A |
| 10 | BICF2S23714390 | 62430040 | 0 | 0    | 0       | A |
| 10 | BICF2P13034    | 62435990 | A | 0.75 | 0.9286  | G |
| 10 | BICF2S23752183 | 62455536 | A | 0.75 | 0.9286  | G |
| 10 | BICF2P788627   | 62465701 | G | 0.25 | 0.07143 | A |
| 10 | BICF2P528613   | 62472085 | G | 1    | 1       | A |
| 10 | BICF2S23550325 | 62488946 | G | 0.75 | 0.9286  | A |
| 10 | BICF2S23538026 | 62501024 | G | 1    | 1       | A |
| 10 | BICF2S23050968 | 62511561 | G | 0    | 0       | A |
| 10 | BICF2P1342964  | 62520032 | A | 0    | 0       | G |

|    |                         |          |   |      |         |   |
|----|-------------------------|----------|---|------|---------|---|
| 10 | BICF2P509550            | 62526738 | A | 1    | 1       | G |
| 10 | BICF2S23349937          | 62542700 | 0 | 0    | 0       | G |
| 10 | BICF2P266654            | 62553016 | A | 0    | 0       | G |
| 10 | BICF2S23058165          | 62557307 | A | 0    | 0       | G |
| 10 | BICF2P974373            | 62562585 | A | 1    | 1       | T |
| 10 | BICF2P670604            | 62572884 | 0 | 0    | 0       | C |
| 10 | BICF2P689210            | 62587856 | A | 0    | 0       | G |
| 10 | BICF2S2416924           | 62594639 | G | 0.5  | 0.5     | A |
| 10 | BICF2P805358            | 62594881 | A | 0    | 0       | G |
| 10 | BICF2P805344            | 62597593 | A | 0    | 0       | G |
| 10 | BICF2P725442            | 62613031 | A | 0.25 | 0.07143 | G |
| 10 | BICF2P243374            | 62619695 | A | 0.5  | 0.5     | G |
| 10 | BICF2S23534053          | 62629612 | A | 0    | 0       | G |
| 10 | BICF2P288085            | 62645935 | A | 0    | 0       | G |
| 10 | TIGRP2P141924_rs9172925 | 62656688 | 0 | 0    | 0       | G |
| 10 | BICF2P749405            | 62686051 | 0 | 0    | 0       | T |
| 10 | BICF2P833588            | 62689442 | 0 | 0    | 0       | G |
| 10 | BICF2S2309846           | 62708929 | C | 0.5  | 0.3571  | A |
| 10 | BICF2S22933661          | 62726601 | A | 0    | 0       | C |
| 10 | BICF2P1324538           | 62734011 | T | 0    | 0       | A |
| 10 | G613f38S204             | 62799364 | G | 0    | 0       | A |
| 10 | TIGRP2P141929_rs8992288 | 62819575 | 0 | 0    | 0       | C |
| 10 | BICF2S23146473          | 62825949 | G | 0    | 0       | A |
| 10 | BICF2P448896            | 62838193 | 0 | 0    | 0       | A |
| 10 | BICF2P450001            | 62867448 | 0 | 0    | 0       | C |
| 10 | BICF2P580757            | 62884482 | A | 0    | 0       | C |
| 10 | BICF2P263991            | 62887772 | A | 0    | 0       | G |
| 10 | BICF2S23622289          | 62905694 | G | 0    | 0       | A |
| 10 | BICF2P175788            | 62916778 | A | 0    | 0       | G |
| 10 | BICF2S2304896           | 62934137 | G | 0    | 0       | A |
| 10 | BICF2P505540            | 62941836 | A | 0.25 | 0.2143  | G |
| 10 | BICF2P803196            | 62951390 | A | 0    | 0.2143  | G |
| 10 | BICF2P1177857           | 62964153 | A | 0.5  | 0.3571  | C |
| 10 | BICF2P409830            | 62985184 | C | 0.5  | 0.3333  | A |
| 10 | BICF2P1208844           | 62996439 | C | 0.5  | 0.3571  | A |
| 10 | BICF2P1433825           | 62999439 | 0 | 0    | 0       | A |
| 10 | BICF2P190659            | 63015292 | 0 | 0    | 0       | G |
| 10 | BICF2P126731            | 63028470 | A | 0    | 0       | G |
| 10 | BICF2S23130129          | 63033467 | A | 0    | 0       | G |
| 10 | BICF2P1155464           | 63046301 | A | 0.5  | 0.3571  | G |
| 10 | BICF2P1045625           | 63057138 | G | 0    | 0       | A |
| 10 | BICF2P1045624           | 63057561 | A | 0.5  | 0.3571  | G |
| 10 | BICF2S22939962          | 63070785 | G | 0    | 0       | A |
| 10 | BICF2S2312153           | 63079450 | G | 0.25 | 0.4286  | A |
| 10 | BICF2P362736            | 63093057 | G | 0    | 0       | A |
| 10 | BICF2P1321141           | 63108981 | A | 0    | 0       | G |
| 10 | BICF2P1075652           | 63114167 | G | 0.75 | 0.5714  | A |

|    |                         |          |   |      |        |   |
|----|-------------------------|----------|---|------|--------|---|
| 10 | BICF2P873686            | 63126598 | A | 1    | 0.5714 | G |
| 10 | BICF2P1377892           | 63145599 | G | 0.25 | 0.2143 | A |
| 10 | BICF2S2356471           | 63153499 | G | 0    | 0      | A |
| 10 | BICF2P1349687           | 63170807 | G | 0    | 0      | A |
| 10 | BICF2P1239039           | 63190406 | A | 0    | 0      | G |
| 10 | BICF2P246143            | 63192697 | A | 0    | 0      | G |
| 10 | BICF2P839523            | 63206763 | A | 0.5  | 0.6429 | G |
| 10 | BICF2P651097            | 63222315 | G | 0    | 0      | A |
| 10 | BICF2P1106052           | 63228480 | A | 0    | 0      | G |
| 10 | BICF2P366020            | 63266214 | A | 0    | 0      | G |
| 10 | BICF2S23523758          | 63277450 | A | 0.5  | 0.3571 | C |
| 10 | BICF2P969746            | 63288343 | A | 0.5  | 0.6429 | G |
| 10 | BICF2P303962            | 63300105 | A | 0.5  | 0.3571 | G |
| 10 | BICF2P693725            | 63309616 | A | 0.75 | 0.7857 | G |
| 10 | BICF2P245367            | 63337957 | A | 0    | 0      | C |
| 10 | BICF2P516553            | 63352884 | 0 | 0    | 0      | C |
| 10 | BICF2P1236841           | 63359165 | 0 | 0    | 0      | A |
| 10 | BICF2P838826            | 63374847 | 0 | 0    | 0      | C |
| 10 | TIGRP2P141934_rs9137749 | 63387667 | 0 | 0    | 0      | C |
| 10 | BICF2P281100            | 63388227 | 0 | 0    | 0      | A |
| 10 | BICF2S23243834          | 63410384 | 0 | 0    | 0      | G |
| 10 | BICF2P708667            | 63416225 | G | 0.5  | 0.6429 | A |
| 10 | TIGRP2P141935_rs8859222 | 63428044 | 0 | 0    | 0      | A |
| 10 | BICF2S23027006          | 63451235 | A | 0.5  | 0.3571 | T |
| 10 | BICF2P313811            | 63457980 | A | 0.25 | 0.2143 | G |
| 10 | BICF2P884203            | 63502904 | 0 | 0    | 0      | G |
| 10 | BICF2P954365            | 63514320 | 0 | 0    | 0      | G |
| 10 | TIGRP2P141937_rs8883973 | 63541244 | 0 | 0    | 0      | G |
| 10 | BICF2P826311            | 63556420 | A | 0.25 | 0.2143 | G |
| 10 | BICF2P1412890           | 63561112 | 0 | 0    | 0      | G |
| 10 | BICF2P102214            | 63575940 | 0 | 0    | 0      | A |
| 10 | TIGRP2P141938_rs8715718 | 63606940 | 0 | 0    | 0      | A |
| 10 | BICF2P1204793           | 63681449 | 0 | 0    | 0      | C |
| 10 | TIGRP2P141942_rs9095634 | 63701784 | 0 | 0    | 0      | C |
| 10 | BICF2S23147404          | 63731738 | G | 0.25 | 0.4286 | C |
| 10 | BICF2S23352020          | 63740369 | G | 0    | 0      | A |
| 10 | BICF2P406665            | 63755697 | A | 0.25 | 0.4286 | G |
| 10 | BICF2S23759973          | 63762414 | A | 0.25 | 0.2143 | T |
| 10 | BICF2P883114            | 63767706 | G | 0    | 0      | A |
| 10 | BICF2P871442            | 63786358 | G | 0.25 | 0.2143 | A |
| 10 | BICF2P1290902           | 63811522 | A | 0.5  | 0.3571 | C |
| 10 | BICF2P233006            | 63814404 | G | 0.25 | 0.2143 | A |
| 10 | BICF2S23751386          | 63828906 | A | 0    | 0      | G |
| 10 | TIGRP2P141945_rs9121589 | 63842961 | 0 | 0    | 0      | C |
| 10 | BICF2P1057357           | 63851597 | 0 | 0    | 0      | A |
| 10 | BICF2S23250878          | 63863630 | A | 0    | 0      | G |
| 10 | BICF2P609264            | 63881490 | A | 0    | 0      | G |

|    |                         |          |   |      |        |   |
|----|-------------------------|----------|---|------|--------|---|
| 10 | BICF2S23140895          | 63891522 | A | 0    | 0      | G |
| 10 | BICF2S23430811          | 63896578 | A | 0    | 0      | G |
| 10 | BICF2S23332231          | 63912428 | A | 0.25 | 0.2143 | G |
| 10 | TIGRP2P141946_rs9220412 | 63927682 | 0 | 0    | 0      | A |
| 10 | BICF2S23319032          | 63928850 | G | 0.5  | 0.3571 | A |
| 10 | BICF2S23036697          | 63940162 | A | 0    | 0      | G |
| 10 | BICF2P667276            | 63958043 | A | 0    | 0      | C |
| 10 | BICF2P298235            | 63964924 | A | 0    | 0      | G |
| 10 | BICF2S23354787          | 63989984 | A | 0    | 0      | T |
| 10 | BICF2S23126279          | 63992813 | A | 0    | 0      | C |
| 10 | BICF2P233343            | 64005842 | A | 0.75 | 0.5714 | G |
| 10 | BICF2P572902            | 64023984 | 0 | 0    | 0      | G |
| 10 | BICF2P1163634           | 64047187 | G | 0    | 0      | A |
| 10 | BICF2P1014884           | 64070127 | G | 0.75 | 0.5714 | A |
| 10 | BICF2P993724            | 64089210 | 0 | 0    | 0      | G |
| 10 | BICF2S22953011          | 64092374 | A | 0.5  | 0.3571 | G |
| 10 | BICF2P240405            | 64102544 | A | 0    | 0      | C |
| 10 | BICF2P1140675           | 64127179 | G | 0    | 0      | A |
| 10 | BICF2P46466             | 64135761 | A | 0    | 0      | C |
| 10 | BICF2S2419687           | 64155748 | G | 0.25 | 0.4286 | A |
| 10 | BICF2P831347            | 64164572 | G | 0.25 | 0.4286 | A |
| 10 | BICF2P831346            | 64164763 | 0 | 0    | 0      | G |
| 10 | BICF2P1263316           | 64180437 | A | 0.5  | 0.6429 | G |
| 10 | BICF2P903213            | 64191057 | G | 0.25 | 0.2143 | A |
| 10 | BICF2P740157            | 64197051 | 0 | 0    | 0      | G |
| 10 | BICF2P1322426           | 64219309 | A | 0    | 0      | G |
| 10 | BICF2P720310            | 64228751 | A | 0    | 0      | G |
| 10 | BICF2S23417780          | 64246141 | A | 0.5  | 0.3571 | G |
| 10 | BICF2P1031533           | 64251818 | C | 0.25 | 0.4286 | A |
| 10 | BICF2S23520126          | 64288769 | A | 0    | 0      | G |
| 10 | BICF2P1071598           | 64302966 | 0 | 0    | 0      | A |
| 10 | BICF2P1085256           | 64312701 | 0 | 0    | 0      | A |
| 10 | BICF2P793868            | 64338938 | 0 | 0    | 0      | A |
| 10 | BICF2P396608            | 64345708 | 0 | 0    | 0      | A |
| 10 | BICF2S2357810           | 64374696 | C | 0    | 0      | A |
| 10 | BICF2S23629952          | 64380099 | A | 0    | 0      | G |
| 10 | BICF2P407581            | 64392762 | 0 | 0    | 0      | A |
| 10 | BICF2S23344347          | 64406684 | A | 0    | 0      | C |
| 10 | BICF2P1412124           | 64413467 | A | 0.25 | 0.4286 | G |
| 10 | BICF2P1140670           | 64426203 | C | 0.5  | 0.6429 | A |
| 10 | BICF2P113421            | 64466685 | G | 0.5  | 0.6429 | A |
| 10 | BICF2P149407            | 64477123 | 0 | 0    | 0      | A |
| 10 | BICF2P172081            | 64484378 | A | 0    | 0      | C |
| 10 | BICF2P492593            | 64512298 | C | 0.5  | 0.6429 | A |
| 10 | BICF2S23144987          | 64524584 | G | 0.25 | 0.4286 | A |
| 10 | BICF2P1310267           | 64532235 | A | 0.5  | 0.6429 | G |
| 10 | BICF2P156225            | 64539642 | A | 0.25 | 0.4286 | G |

|    |                         |          |   |      |        |   |
|----|-------------------------|----------|---|------|--------|---|
| 10 | BICF2P1464859           | 64550628 | A | 0.25 | 0.4286 | G |
| 10 | BICF2P147162            | 64561411 | 0 | 0    | 0      | G |
| 10 | BICF2P1235499           | 64573625 | A | 0    | 0.4167 | G |
| 10 | BICF2P1350758           | 64605215 | 0 | 0    | 0      | G |
| 10 | BICF2P576559            | 64629526 | A | 0.5  | 0.6429 | C |
| 10 | BICF2P115480            | 64630259 | C | 0.25 | 0.4286 | A |
| 10 | BICF2P836617            | 64649074 | C | 0.5  | 0.6429 | A |
| 10 | BICF2P140529            | 64660895 | G | 0.25 | 0.4167 | A |
| 10 | TIGRP2P141960_rs8647390 | 64665794 | 0 | 0    | 0      | A |
| 10 | BICF2P20411             | 64693020 | A | 0    | 0.2143 | G |
| 10 | BICF2P249414            | 64708495 | G | 0.25 | 0.2143 | A |
| 10 | BICF2P1237960           | 64715653 | G | 0.25 | 0.2143 | A |
| 10 | BICF2P950139            | 64735502 | 0 | 0    | 0      | C |
| 10 | BICF2P154539            | 64749485 | G | 0.25 | 0.2143 | A |
| 10 | BICF2P282216            | 64758538 | A | 0.25 | 0.2143 | G |
| 10 | BICF2S22933323          | 64774204 | A | 0    | 0      | G |
| 10 | BICF2P86686             | 64781455 | A | 0.5  | 0.3571 | G |
| 10 | BICF2P1205980           | 64795710 | A | 0.25 | 0.4286 | G |
| 10 | BICF2P81653             | 64803636 | A | 0    | 0      | G |
| 10 | BICF2P67520             | 64843647 | 0 | 0    | 0      | G |
| 10 | TIGRP2P141963_rs8714161 | 64864576 | 0 | 0    | 0      | G |
| 10 | BICF2S23348561          | 64892535 | C | 0    | 0      | G |
| 10 | BICF2S24310295          | 64931987 | A | 0    | 0      | G |
| 10 | BICF2P920271            | 64942771 | A | 0    | 0      | G |
| 10 | BICF2P1278784           | 64956435 | A | 0.75 | 0.7857 | G |
| 10 | BICF2P203418            | 64968237 | G | 0    | 0      | A |
| 10 | BICF2P562624            | 64980485 | 0 | 0    | 0      | G |
| 10 | BICF2P753850            | 64990335 | T | 0    | 0      | A |
| 10 | BICF2S23717810          | 65006612 | C | 0    | 0      | A |
| 10 | BICF2P783256            | 65023208 | A | 0    | 0      | G |
| 10 | BICF2P977085            | 65042098 | G | 0    | 0      | A |
| 10 | BICF2P625967            | 65047487 | G | 0    | 0      | A |
| 10 | BICF2P202302            | 65059277 | G | 0    | 0      | A |
| 10 | BICF2P1410418           | 65064896 | A | 0    | 0      | G |
| 10 | BICF2P424885            | 65068693 | A | 0    | 0      | T |
| 10 | BICF2P496371            | 65089416 | A | 0    | 0      | G |
| 10 | BICF2S23529008          | 65100396 | A | 0    | 0      | G |
| 10 | BICF2P910926            | 65142039 | C | 0    | 0      | A |
| 10 | BICF2S2376500           | 65161142 | A | 0    | 0      | G |
| 10 | BICF2P836133            | 65186944 | 0 | NA   | 0      | G |
| 10 | BICF2S23642683          | 65209901 | G | 0    | 0      | A |
| 10 | BICF2S23255126          | 65225959 | G | 0    | 0      | A |
| 10 | BICF2S23624241          | 65230563 | A | 0    | 0      | C |
| 10 | BICF2S235304            | 65243918 | A | 0    | 0      | G |
| 10 | BICF2P107806            | 65251772 | A | 0    | 0      | G |
| 10 | BICF2P1097881           | 65262845 | C | 0    | 0      | G |
| 10 | BICF2P864182            | 65282831 | A | 0    | 0      | G |



|    |                |          |   |      |        |   |
|----|----------------|----------|---|------|--------|---|
| 10 | BICF2P132840   | 65286567 | A | 0    | 0      | G |
| 10 | BICF2P666262   | 65297204 | 0 | 0    | 0      | A |
| 10 | BICF2P99974    | 65318848 | A | 0.75 | 0.5714 | G |
| 10 | BICF2P945349   | 65327276 | G | 0    | 0      | A |
| 10 | BICF2P1306344  | 65334245 | A | 0    | 0      | G |
| 10 | BICF2P401973   | 65344772 | A | 0.25 | 0.4286 | G |
| 10 | BICF2P1005657  | 65359322 | A | 0.25 | 0.4286 | G |
| 10 | BICF2P1420240  | 65366635 | G | 0.25 | 0.3333 | A |
| 10 | BICF2S23623302 | 65393869 | A | 0.75 | 0.7857 | G |
| 10 | BICF2S23623994 | 65418869 | A | 0    | 0      | G |
| 10 | BICF2P885286   | 65431516 | A | 0.5  | 0.3571 | G |
| 10 | BICF2P725846   | 65436189 | 0 | 0    | 0      | A |
| 10 | BICF2S2412927  | 65447999 | G | 0    | 0      | A |
| 10 | BICF2P365368   | 65458754 | C | 1    | 1      | A |
| 10 | BICF2P1269878  | 65461608 | A | 0    | 0      | C |
| 10 | BICF2P491944   | 65480823 | A | 0.25 | 0.2143 | G |
| 10 | BICF2S23729762 | 65491085 | G | 0    | 0      | A |
| 10 | BICF2S23763177 | 65493060 | A | 0.25 | 0.4286 | G |
| 10 | BICF2P923590   | 65510914 | A | 0.5  | 0.6429 | C |
| 10 | BICF2P298375   | 65535575 | 0 | 0    | 0      | G |
| 10 | BICF2S23147444 | 65549779 | A | 0    | 0      | G |
| 10 | BICF2S23648387 | 65569279 | A | 0.25 | 0.2143 | C |
| 10 | BICF2S23534797 | 65578773 | A | 0.5  | 0.3571 | G |
| 10 | BICF2S22936981 | 65615556 | C | 0.25 | 0.4286 | A |
| 10 | BICF2S23649701 | 65620990 | A | 0    | 0      | G |
| 10 | BICF2P1143451  | 65638950 | 0 | 0    | 0      | A |
| 10 | BICF2P671940   | 65654565 | A | 0    | 0      | G |
| 10 | BICF2P1257167  | 65668705 | G | 0.25 | 0.4286 | A |
| 10 | BICF2P1029670  | 65695950 | G | 0.25 | 0.4286 | A |
| 10 | BICF2P1259294  | 65708418 | A | 0.25 | 0.2143 | C |
| 10 | BICF2P904177   | 65752166 | A | 0.25 | 0.4286 | G |
| 10 | BICF2P893025   | 65788849 | A | 0.25 | 0.4286 | G |
| 10 | BICF2P791777   | 65794514 | G | 0.25 | 0.4286 | A |
| 10 | BICF2P1144616  | 65813397 | 0 | 0    | 0      | A |
| 10 | BICF2P350455   | 65827319 | 0 | 0    | 0      | C |
| 10 | BICF2P1238698  | 65846335 | G | 0    | 0.4286 | A |
| 10 | BICF2P1015704  | 65868000 | G | 0.75 | 0.7857 | A |
| 10 | BICF2P237731   | 65878116 | A | 0.25 | 0.4286 | G |
| 10 | BICF2P293836   | 65897633 | 0 | 0    | 0      | A |
| 10 | BICF2P1021241  | 65908818 | 0 | 0    | 0      | A |
| 10 | BICF2P1363949  | 65932134 | G | 0.25 | 0.2143 | A |
| 10 | BICF2P136377   | 65943806 | A | 0.75 | 0.7857 | G |
| 10 | BICF2P497221   | 65955312 | G | 0.75 | 0.7857 | A |
| 10 | BICF2P221274   | 65970655 | A | 0.75 | 0.9    | G |
| 10 | BICF2S23252447 | 65997715 | G | 0.75 | 0.7857 | A |
| 10 | BICF2P538838   | 66014522 | A | 0.5  | 0.6429 | G |
| 10 | BICF2P858466   | 66055746 | A | 1    | 1      | G |

|    |                |          |   |      |        |   |
|----|----------------|----------|---|------|--------|---|
| 10 | BICF2P772937   | 66062942 | A | 0    | 0      | C |
| 10 | BICF2P145395   | 66079289 | G | 0.25 | 0.4286 | A |
| 10 | BICF2P328179   | 66108993 | A | 0.25 | 0.4167 | G |
| 10 | BICF2P1222884  | 66127687 | A | 0.75 | 0.7857 | G |
| 10 | BICF2S2393496  | 66145428 | 0 | 0    | 0      | A |
| 10 | BICF2P284083   | 66148745 | T | 0.75 | 0.7857 | A |
| 10 | BICF2P960444   | 66164148 | G | 0.75 | 0.7857 | A |
| 10 | BICF2S23125279 | 66247778 | A | 0.5  | 0.6429 | G |
| 10 | BICF2P716590   | 66282150 | 0 | 0    | 0      | G |
| 10 | BICF2S2316011  | 66308890 | C | 0.5  | 0.3571 | A |
| 10 | BICF2S23237843 | 66312758 | A | 0.5  | 0.3571 | T |
| 10 | BICF2P863351   | 66323026 | G | 0.25 | 0.4286 | A |
| 10 | BICF2P37110    | 66337249 | A | 0.5  | 0.6429 | G |
| 10 | BICF2P253659   | 66346803 | A | 0.5  | 0.6429 | G |
| 10 | BICF2S23045651 | 66368522 | C | 0.5  | 0.3571 | A |
| 10 | BICF2P465304   | 66381184 | A | 0.75 | 0.5714 | G |
| 10 | BICF2S23117831 | 66397820 | A | 0.5  | 0.3571 | G |
| 10 | BICF2S2459921  | 66406558 | 0 | 0    | 0      | A |
| 10 | BICF2P803329   | 66422090 | 0 | 0    | 0      | A |
| 10 | BICF2P428105   | 66437636 | C | 0.25 | 0.4286 | A |
| 10 | BICF2S23047668 | 66468306 | A | 0    | 0      | G |
| 10 | BICF2P300478   | 66470296 | A | 0.5  | 0.6667 | C |
| 10 | BICF2P484572   | 66491789 | A | 0    | 0      | G |
| 10 | BICF2P1323493  | 66507839 | A | 0    | 0      | C |
| 10 | BICF2S2307824  | 66518743 | A | 0    | 0      | T |
| 10 | BICF2P1364780  | 66528809 | G | 0.5  | 0.6429 | A |
| 10 | BICF2P1202     | 66549437 | A | 0.5  | 0.6429 | G |
| 10 | BICF2S23048617 | 66551874 | A | 1    | 1      | C |
| 10 | BICF2S2303703  | 66562182 | A | 0.5  | 0.3571 | G |
| 10 | BICF2S22934298 | 66574366 | C | 0.5  | 0.3571 | A |
| 10 | BICF2P657834   | 66586397 | 0 | 0    | 0      | C |
| 10 | BICF2S23146267 | 66606742 | A | 0.5  | 0.6429 | C |
| 10 | BICF2S22931532 | 66608939 | A | 0.5  | 0.6667 | C |
| 10 | BICF2P373390   | 66637311 | A | 0.5  | 0.6429 | C |
| 10 | BICF2P1367936  | 66652397 | A | 0.5  | 0.6429 | C |
| 10 | BICF2P711413   | 66656760 | G | 0.5  | 0.6429 | C |
| 10 | BICF2P538827   | 66672305 | A | 0.5  | 0.6667 | G |
| 10 | BICF2P92588    | 66678866 | A | 0.5  | 0.6429 | G |
| 10 | BICF2P410774   | 66691114 | G | 0.25 | 0.2143 | A |
| 10 | BICF2P242695   | 66703272 | G | 0.25 | 0.2143 | A |
| 10 | BICF2P1083795  | 66718590 | G | 0.25 | 0.2143 | A |
| 10 | BICF2P919415   | 66731359 | A | 0.25 | 0.2143 | G |
| 10 | BICF2S23422025 | 66738024 | G | 0.25 | 0.2143 | A |
| 10 | BICF2P260073   | 66752360 | A | 0.75 | 0.7857 | G |
| 10 | BICF2P1201684  | 66762626 | G | 0.25 | 0.2143 | A |
| 10 | BICF2P1232144  | 66770958 | G | 0    | 0.1667 | A |
| 10 | BICF2P926226   | 66787521 | G | 0.25 | 0.2143 | A |

|    |                         |          |   |      |        |   |
|----|-------------------------|----------|---|------|--------|---|
| 10 | BICF2P1149839           | 66794420 | G | 0.25 | 0.1667 | A |
| 10 | BICF2P264719            | 66804956 | A | 0.25 | 0.2143 | G |
| 10 | BICF2P215505            | 66851050 | G | 0    | 0      | A |
| 10 | BICF2P1362589           | 66865552 | G | 0    | 0      | A |
| 10 | BICF2P758662            | 66873121 | 0 | 0    | 0      | A |
| 10 | TIGRP2P141994_rs9192630 | 66893387 | 0 | 0    | 0      | A |
| 10 | BICF2P799375            | 66902872 | A | 0    | 0      | C |
| 10 | BICF2P159108            | 66907478 | A | 0    | 0      | T |
| 10 | BICF2P1458360           | 66928516 | G | 0    | 0      | A |
| 10 | BICF2P1210926           | 66945341 | G | 0.25 | 0.3571 | A |
| 10 | BICF2P952681            | 66960719 | A | 0.5  | 0.5714 | G |
| 10 | BICF2P307939            | 66973417 | A | 0.25 | 0.3571 | G |
| 10 | BICF2P1334283           | 66988434 | 0 | 0    | 0      | C |
| 10 | BICF2P760297            | 67009699 | A | 0.25 | 0.3571 | G |
| 10 | BICF2P1039039           | 67011247 | A | 0.25 | 0.3333 | G |
| 10 | BICF2P1088514           | 67022843 | A | 0.25 | 0.3571 | G |
| 10 | BICF2P540685            | 67033712 | A | 0.25 | 0.3571 | C |
| 10 | BICF2P64524             | 67055226 | C | 0.25 | 0.3571 | A |
| 10 | BICF2P111414            | 67061245 | A | 0.25 | 0.3571 | G |
| 10 | BICF2P985197            | 67064223 | G | 0.25 | 0.3571 | A |
| 10 | BICF2S23754732          | 67069144 | 0 | 0    | 0      | G |
| 10 | BICF2P742809            | 67084837 | 0 | 0    | 0      | A |
| 10 | BICF2S23428862          | 67094853 | A | 0.25 | 0.3571 | C |
| 10 | BICF2P693277            | 67103993 | C | 0    | 0      | A |
| 10 | BICF2P1197181           | 67113618 | A | 0    | 0      | G |
| 10 | BICF2P15376             | 67114562 | A | 0.5  | 0.5714 | G |
| 10 | BICF2P318406            | 67129157 | C | 0    | 0      | A |
| 10 | BICF2S23416849          | 67144682 | C | 0    | 0      | A |
| 10 | BICF2S23032971          | 67170094 | A | 0    | 0      | G |
| 10 | BICF2P168751            | 67179972 | G | 0.25 | 0.3571 | A |
| 10 | BICF2P321202            | 67198208 | A | 0.5  | 0.4286 | G |
| 10 | BICF2S23349532          | 67209545 | C | 0.25 | 0.3571 | A |
| 10 | BICF2S23053109          | 67219189 | A | 0.25 | 0.1    | G |
| 10 | BICF2S23238533          | 67239149 | A | 0.25 | 0.2143 | G |
| 10 | BICF2P1410377           | 67240594 | G | 0    | 0      | A |
| 10 | BICF2S2373178           | 67256449 | C | 0.75 | 0.6429 | A |
| 10 | BICF2S23342136          | 67274729 | 0 | 0    | 0      | C |
| 10 | BICF2P569042            | 67281924 | 0 | 0    | 0      | A |
| 10 | BICF2P1258359           | 67296982 | 0 | 0    | 0      | G |
| 10 | BICF2P818558            | 67322388 | A | 0.25 | 0.3571 | G |
| 10 | BICF2S23252904          | 67340116 | A | 0.5  | 0.4286 | G |
| 10 | BICF2P1339694           | 67350696 | A | 0    | 0      | G |
| 10 | BICF2P607913            | 67358179 | A | 0    | 0      | G |
| 10 | BICF2S23741741          | 67369458 | A | 0.25 | 0.3571 | G |
| 10 | BICF2S23522374          | 67387024 | A | 0    | 0      | G |
| 10 | BICF2P227986            | 67402622 | 0 | 0    | 0      | G |
| 10 | BICF2S23336950          | 67435887 | G | 0    | 0      | A |

|    |                         |          |   |      |        |   |
|----|-------------------------|----------|---|------|--------|---|
| 10 | BICF2P1049132           | 67442175 | A | 0    | 0      | G |
| 10 | BICF2P1050346           | 67450546 | A | 0    | 0      | C |
| 10 | BICF2P233161            | 67463699 | G | 1    | 0.6667 | A |
| 10 | BICF2P1298279           | 67474760 | G | 0.75 | 0.6429 | A |
| 10 | BICF2P1413241           | 67483518 | A | 0    | 0      | G |
| 10 | BICF2P512899            | 67497312 | G | 0    | 0      | A |
| 10 | BICF2P268930            | 67514763 | 0 | 0    | 0      | C |
| 10 | BICF2S23315090          | 67550123 | G | 0    | 0      | A |
| 10 | BICF2P1351728           | 67561930 | 0 | 0    | 0      | G |
| 10 | BICF2S23622913          | 67563585 | A | 0.25 | 0.25   | C |
| 10 | BICF2P359014            | 67574241 | G | 0.75 | 0.7857 | A |
| 10 | BICF2P800213            | 67591260 | G | 0    | 0      | A |
| 10 | BICF2S23550668          | 67599867 | A | 0    | 0      | C |
| 10 | BICF2P1146600           | 67608673 | A | 0    | 0      | G |
| 10 | BICF2P1321313           | 67618207 | A | 0    | 0      | G |
| 10 | BICF2P993582            | 67627254 | A | 0    | 0      | G |
| 10 | BICF2P278101            | 67637494 | G | 0.5  | 0.5    | A |
| 10 | BICF2S23251761          | 67647447 | A | 0.25 | 0.2857 | G |
| 10 | BICF2P526962            | 67660908 | G | 0.5  | 0.5    | A |
| 10 | BICF2P773747            | 67676047 | G | 0.5  | 0.5    | A |
| 10 | BICF2P1456818           | 67686923 | A | 0    | 0      | C |
| 10 | BICF2S23326718          | 67696570 | A | 0.25 | 0.2857 | G |
| 10 | BICF2P989136            | 67730683 | 0 | 0    | 0      | G |
| 10 | BICF2P1406628           | 67750033 | A | 0    | 0      | G |
| 10 | BICF2P400502            | 67768061 | C | 1    | 1      | A |
| 10 | BICF2P823840            | 67803124 | G | 0.5  | 0.5    | A |
| 10 | BICF2S22960468          | 67807496 | G | 0.5  | 0.5    | A |
| 10 | BICF2S23538986          | 67828815 | 0 | 0    | 0      | G |
| 10 | BICF2P29743             | 67844432 | G | 0.5  | 0.5    | A |
| 10 | BICF2S23647325          | 67858787 | A | 0.25 | 0.2143 | G |
| 10 | BICF2S2294962           | 67865659 | A | 0.25 | 0.2143 | G |
| 10 | BICF2P886496            | 67893625 | G | 0.75 | 0.7857 | A |
| 10 | BICF2S23214734          | 67897365 | A | 0    | 0      | G |
| 10 | BICF2P1336575           | 67922240 | A | 0.25 | 0.2143 | C |
| 10 | BICF2P511761            | 67935493 | A | 0.25 | 0.2143 | G |
| 10 | BICF2S231670            | 67938032 | A | 0.5  | 0.5    | G |
| 10 | BICF2P541019            | 67947533 | A | 0.5  | 0.5    | G |
| 10 | BICF2S2374310           | 67956932 | A | 0.5  | 0.5    | G |
| 10 | TIGRP2P142016_rs8680133 | 67973781 | 0 | 0    | 0      | G |
| 10 | BICF2P1113786           | 67979635 | A | 0    | 0      | G |
| 10 | BICF2P923352            | 67988744 | C | 1    | 1      | A |
| 10 | BICF2P341259            | 68001089 | A | 0    | 0      | G |
| 10 | BICF2S23758497          | 68015910 | C | 0    | 0      | A |
| 10 | BICF2P887094            | 68034360 | 0 | 0    | 0      | T |
| 10 | TIGRP2P142019_rs8543649 | 68059667 | 0 | 0    | 0      | A |
| 10 | BICF2P291770            | 68075263 | 0 | 0    | 0      | G |
| 10 | BICF2S23030401          | 68100090 | A | 0    | 0      | G |

|    |                |          |   |      |        |   |
|----|----------------|----------|---|------|--------|---|
| 10 | BICF2P474839   | 68108759 | G | 0    | 0      | C |
| 10 | BICF2P862338   | 68122903 | C | 0.5  | 0.5    | A |
| 10 | BICF2P1241044  | 68129711 | G | 0.5  | 0.5    | A |
| 10 | BICF2P282379   | 68141665 | A | 0    | 0      | G |
| 10 | BICF2S23130745 | 68149157 | A | 0    | 0      | G |
| 10 | BICF2P638141   | 68168692 | G | 0.25 | 0.2143 | A |
| 10 | BICF2P869152   | 68173197 | 0 | 0    | 0      | G |
| 10 | BICF2P401145   | 68184234 | 0 | 0    | 0      | G |
| 10 | BICF2P1451979  | 68195242 | G | 0.75 | 0.7143 | A |
| 10 | BICF2P1336425  | 68210492 | A | 0.75 | 0.75   | G |
| 10 | BICF2P406567   | 68226116 | G | 0.75 | 0.7143 | A |
| 10 | BICF2P110742   | 68234268 | A | 0.25 | 0.2143 | G |
| 10 | BICF2P1188307  | 68244692 | A | 0.5  | 0.5    | G |
| 10 | BICF2P819940   | 68263833 | A | 0.25 | 0.2143 | G |
| 10 | BICF2P1332669  | 68271876 | A | 0    | 0      | G |
| 10 | BICF2P1186682  | 68277894 | A | 0    | 0      | G |
| 10 | BICF2P449526   | 68290145 | G | 0.25 | 0.2857 | A |
| 10 | BICF2S23725285 | 68301618 | 0 | 0    | 0      | G |
| 10 | BICF2P660961   | 68320226 | A | 0.5  | 0.5    | G |
| 10 | BICF2P663129   | 68323860 | C | 0    | 0      | A |
| 10 | BICF2P628262   | 68326970 | A | 0    | 0      | C |
| 10 | BICF2P808237   | 68340072 | A | 0    | 0      | T |
| 10 | BICF2S23631554 | 68348260 | A | 0.25 | 0.2143 | C |
| 10 | BICF2P112859   | 68365696 | 0 | 0    | 0      | C |
| 10 | BICF2P330467   | 68369705 | A | 0.25 | 0.2143 | G |
| 10 | BICF2P481574   | 68399873 | 0 | 0    | 0      | G |
| 10 | BICF2S23052105 | 68403365 | A | 0    | 0      | G |
| 10 | BICF2S23141371 | 68406177 | A | 0.5  | 0.5    | G |
| 10 | BICF2P725803   | 68416972 | G | 0    | 0      | A |
| 10 | BICF2P203681   | 68431740 | 0 | 0    | 0      | A |
| 10 | BICF2P419450   | 68442452 | A | 0.25 | 0.2857 | G |
| 10 | BICF2P642104   | 68457842 | A | 0.5  | 0.2    | G |
| 10 | BICF2P1090002  | 68462189 | A | 0    | 0      | G |
| 10 | BICF2P381674   | 68476348 | T | 0    | 0      | A |
| 10 | BICF2S23541283 | 68483976 | A | 0    | 0      | G |
| 10 | BICF2P192539   | 68494938 | 0 | 0    | 0      | G |
| 10 | BICF2P445764   | 68533519 | 0 | 0    | 0      | A |
| 10 | BICF2P236497   | 68540328 | 0 | 0    | 0      | G |
| 10 | BICF2P200409   | 68557366 | 0 | 0    | 0      | G |
| 10 | BICF2P1067306  | 68564897 | G | 1    | 1      | A |
| 10 | BICF2P1097534  | 68583455 | G | 0.75 | 0.7857 | A |
| 10 | BICF2P1452928  | 68601498 | A | 0.5  | 0.5    | G |
| 10 | BICF2P1036499  | 68614890 | A | 0.25 | 0.2143 | G |
| 10 | BICF2S23740996 | 68625641 | A | 0    | 0      | G |
| 10 | BICF2P1317379  | 68632054 | G | 0.25 | 0.2143 | A |
| 10 | BICF2S23540461 | 68646224 | A | 0    | 0      | G |
| 10 | BICF2S2395155  | 68648839 | 0 | 0    | 0      | A |

|    |                         |          |   |      |        |   |
|----|-------------------------|----------|---|------|--------|---|
| 10 | BICF2P1190703           | 68651457 | G | 0.5  | 0.5    | A |
| 10 | TIGRP2P142024_rs8737244 | 68655822 | 0 | 0    | 0      | G |
| 10 | BICF2P290605            | 68675666 | G | 0.5  | 0.5    | A |
| 10 | BICF2P481925            | 68683673 | G | 0.25 | 0.2143 | A |
| 10 | BICF2P1231633           | 68685371 | A | 0.5  | 0.5    | G |
| 10 | BICF2P1231632           | 68685389 | A | 0.25 | 0.2857 | C |
| 10 | BICF2S23550231          | 68696367 | A | 0.5  | 0.5    | G |
| 10 | BICF2S23150753          | 68702444 | A | 0    | 0      | G |
| 10 | BICF2P627923            | 68715900 | G | 0.25 | 0.2857 | A |
| 10 | BICF2S23039709          | 68727213 | G | 0    | 0      | C |
| 10 | BICF2P1083139           | 68741290 | A | 0    | 0      | G |
| 10 | BICF2P837623            | 68752093 | A | 0    | 0      | C |
| 10 | BICF2P1177811           | 68765532 | A | 0.25 | 0.2143 | G |
| 10 | BICF2P1298571           | 68775993 | A | 0.75 | 0.7143 | G |
| 10 | BICF2P261701            | 68788746 | A | 0.75 | 0.7143 | G |
| 10 | BICF2P1118533           | 68795974 | A | 0    | 0      | G |
| 10 | BICF2P963750            | 68800740 | A | 0    | 0      | G |
| 10 | BICF2P963752            | 68806148 | 0 | 0    | 0      | A |
| 10 | BICF2P1289527           | 68825065 | G | 0.25 | 0.2143 | A |
| 10 | BICF2P1237947           | 68827570 | A | 0.25 | 0.2143 | G |
| 10 | BICF2P1289286           | 68848527 | A | 0.25 | 0.2857 | G |
| 10 | BICF2S23129807          | 68853106 | A | 0.25 | 0.2857 | G |
| 10 | BICF2P1014113           | 68873109 | G | 0    | 0      | A |
| 10 | BICF2P118612            | 68875405 | A | 0.25 | 0.2857 | G |
| 10 | BICF2P335835            | 68892966 | G | 1    | 1      | A |
| 10 | BICF2P242482            | 68901659 | A | 0.25 | 0.2143 | G |
| 10 | BICF2P1433134           | 68913104 | 0 | 0    | 0      | C |
| 10 | BICF2P325728            | 68922078 | T | 0.25 | 0.2857 | A |
| 10 | BICF2P1014812           | 68940432 | A | 0    | 0      | G |
| 10 | BICF2P590306            | 68942918 | G | 0.5  | 0.5    | A |
| 10 | BICF2P987543            | 68956423 | A | 0    | 0      | G |
| 10 | BICF2S23652479          | 68957803 | A | 0    | 0      | G |
| 10 | BICF2S23248674          | 68968385 | A | 0    | 0      | G |
| 10 | BICF2P240586            | 68980418 | A | 0    | 0      | G |
| 10 | BICF2S23015044          | 68992887 | G | 0.5  | 0.5    | A |
| 10 | BICF2S23130895          | 69000703 | G | 0.5  | 0.5    | A |
| 10 | BICF2S23323647          | 69011854 | A | 0    | 0      | G |
| 10 | BICF2S23513088          | 69026432 | A | 0    | 0      | G |
| 10 | BICF2S23413646          | 69037983 | A | 0    | 0      | G |
| 10 | BICF2P1023418           | 69056877 | A | 0.5  | 0.5    | G |
| 10 | BICF2S23040035          | 69057940 | C | 0.5  | 0.5    | A |
| 10 | BICF2P844284            | 69071007 | A | 0.5  | 0.5    | T |
| 10 | BICF2P385526            | 69081207 | 0 | 0    | 0      | G |
| 10 | BICF2S23546794          | 69092374 | G | 0    | 0      | A |
| 10 | TIGRP2P142033_rs8863262 | 69106233 | 0 | 0    | 0      | A |
| 10 | TIGRP2P142034_rs8730701 | 69122501 | 0 | 0    | 0      | C |
| 10 | BICF2P45601             | 69131727 | G | 0.5  | 0.5    | A |

|    |                         |          |   |      |        |   |
|----|-------------------------|----------|---|------|--------|---|
| 10 | BICF2S23511226          | 69146098 | 0 | 0    | 0      | G |
| 10 | TIGRP2P142036_rs8756957 | 69153964 | 0 | 0    | 0      | T |
| 10 | BICF2S23134189          | 69166290 | A | 1    | 1      | G |
| 10 | BICF2P973408            | 69176424 | 0 | 0    | 0      | A |
| 10 | BICF2S23658063          | 69197918 | G | 0    | 0      | A |
| 10 | BICF2P287842            | 69213078 | G | 0.5  | 0.5    | A |
| 10 | BICF2S23041814          | 69223646 | G | 0    | 0      | A |
| 10 | BICF2S23024921          | 69234533 | C | 1    | 1      | A |
| 10 | BICF2S23720065          | 69243872 | 0 | 0    | 0      | A |
| 10 | BICF2P672858            | 69254945 | 0 | 0    | 0      | C |
| 10 | BICF2P675768            | 69270613 | A | 0    | 0      | C |
| 10 | BICF2S23713268          | 69271106 | G | 0.5  | 0.5    | A |
| 10 | BICF2P1408081           | 69275427 | A | 0.5  | 0.5    | G |
| 10 | BICF2S237995            | 69279008 | 0 | 0    | 0      | G |
| 10 | BICF2S23034611          | 69287581 | C | 0.5  | 0.5    | A |
| 10 | BICF2S23253529          | 69306839 | A | 0.5  | 0.5    | G |
| 10 | BICF2S23544398          | 69313908 | G | 0.5  | 0.5    | A |
| 10 | BICF2S2321174           | 69328666 | 0 | 0    | 0      | A |
| 10 | BICF2P1143461           | 69336652 | 0 | 0    | 0      | G |
| 10 | TIGRP2P142038_rs9137793 | 69358593 | 0 | 0    | 0      | G |
| 10 | BICF2P1285490           | 69375178 | A | 0    | 0      | G |
| 10 | BICF2P1285489           | 69375267 | A | 0    | 0      | T |
| 10 | BICF2P848951            | 69383672 | C | 0    | 0      | G |
| 10 | BICF2S23145796          | 69402905 | A | 0.75 | 0.7857 | T |
| 10 | BICF2S23449391          | 69421172 | A | 0    | 0      | C |
| 10 | BICF2P1013880           | 69432399 | A | 0    | 0      | G |
| 10 | BICF2P1010001           | 69462365 | A | 0    | 0      | G |
| 10 | BICF2P364709            | 69478444 | A | 0    | 0      | G |
| 10 | BICF2P855072            | 69490311 | A | 0    | 0      | G |
| 10 | BICF2P926636            | 69504215 | A | 0    | 0      | G |
| 10 | BICF2P926635            | 69504264 | A | 0    | 0      | G |
| 10 | BICF2P1011611           | 69509130 | A | 0    | 0      | G |
| 10 | BICF2P1335642           | 69517985 | 0 | 0    | 0      | A |
| 10 | TIGRP2P142041_rs8706658 | 69547509 | 0 | 0    | 0      | G |
| 10 | BICF2S22940632          | 69579748 | A | 0    | 0      | G |
| 10 | BICF2P550765            | 69592463 | 0 | 0    | 0      | A |
| 10 | BICF2S23134141          | 69606529 | A | 0.75 | 0.7857 | C |
| 10 | BICF2S23521795          | 69617786 | C | 0    | 0      | A |
| 10 | BICF2P1317829           | 69622838 | 0 | 0    | 0      | C |
| 10 | BICF2P585249            | 69639086 | C | 0    | 0      | A |
| 10 | BICF2P795076            | 69651592 | A | 0.25 | 0.2143 | G |
| 10 | BICF2S23160233          | 69661048 | A | 0    | 0      | G |
| 10 | BICF2P1141093           | 69678109 | G | 0.75 | 0.7857 | A |
| 10 | BICF2S23117081          | 69685941 | A | 0.5  | 0.5    | G |
| 10 | BICF2P1037725           | 69698991 | A | 0.25 | 0.2857 | G |
| 10 | BICF2P1023012           | 69708323 | A | 0.25 | 0.2857 | G |
| 10 | BICF2P1458300           | 69719382 | A | 0.5  | 0.5    | G |

|    |                         |          |   |      |        |   |
|----|-------------------------|----------|---|------|--------|---|
| 10 | BICF2S23129820          | 69726334 | A | 0    | 0      | G |
| 10 | BICF2S23323392          | 69756965 | G | 0.75 | 0.7857 | A |
| 10 | BICF2P125172            | 69772764 | 0 | 0    | 0      | A |
| 10 | BICF2P701368            | 69785246 | C | 0.25 | 0.2143 | A |
| 10 | BICF2P755791            | 69789549 | A | 0.75 | 0.7857 | G |
| 10 | BICF2S23414100          | 69797135 | A | 0    | 0      | G |
| 10 | BICF2P1100165           | 69806670 | A | 1    | 0.7857 | G |
| 10 | BICF2P738930            | 69816891 | A | 1    | 1      | G |
| 10 | BICF2P162872            | 69828186 | A | 0    | 0      | G |
| 10 | BICF2P89098             | 69840354 | G | 0.75 | 0.7857 | A |
| 10 | BICF2P196546            | 69856863 | A | 0.75 | 0.7857 | G |
| 10 | BICF2P1356466           | 69870142 | A | 0.25 | 0.2143 | G |
| 10 | BICF2P32638             | 69883562 | G | 0.25 | 0.2143 | A |
| 10 | BICF2P1134765           | 69885507 | G | 0    | 0      | A |
| 10 | BICF2P1278253           | 69899616 | A | 0.75 | 0.7857 | G |
| 10 | BICF2P1154999           | 69909154 | G | 0    | 0      | A |
| 10 | BICF2P358578            | 69910726 | G | 0    | 0      | C |
| 10 | BICF2P771960            | 69921096 | A | 0.25 | 0.2143 | G |
| 10 | BICF2P77420             | 69927082 | T | 0    | 0      | A |
| 10 | BICF2P1172901           | 69936392 | A | 1    | 1      | C |
| 10 | BICF2P1109223           | 69944055 | G | 0.75 | 0.7857 | A |
| 10 | BICF2P777787            | 69964533 | G | 1    | 1      | A |
| 10 | BICF2P1171096           | 69966151 | A | 0.25 | 0.2857 | C |
| 10 | BICF2P333722            | 69981159 | A | 0.75 | 0.7143 | G |
| 10 | BICF2P1221173           | 69989382 | C | 0    | 0      | A |
| 10 | TIGRP2P142044_rs9233700 | 70008406 | 0 | 0    | 0      | A |
| 10 | BICF2S2298653           | 70013832 | A | 0.25 | 0.2857 | G |
| 10 | BICF2P764487            | 70033389 | A | 0    | 0      | G |
| 10 | BICF2P764485            | 70034259 | A | 0    | 0      | G |
| 10 | BICF2P764482            | 70035931 | A | 0    | 0      | C |
| 10 | BICF2P1456274           | 70057001 | A | 1    | 1      | G |
| 10 | BICF2P402451            | 70068417 | A | 0    | 0      | C |
| 10 | BICF2S23049416          | 70075614 | A | 0    | 0      | G |
| 10 | BICF2P224963            | 70082068 | A | 0.25 | 0.2143 | C |
| 10 | BICF2P1235056           | 70095678 | A | 0.75 | 0.7143 | G |
| 10 | BICF2P794522            | 70099413 | A | 0    | 0      | C |
| 10 | BICF2P1435011           | 70104690 | A | 0    | 0      | G |
| 10 | BICF2P892153            | 70123467 | A | 0.75 | 0.7857 | G |
| 10 | BICF2P528249            | 70127651 | A | 0.25 | 0.2143 | G |
| 10 | BICF2P1086379           | 70147501 | G | 0.25 | 0.2857 | A |
| 10 | BICF2P717209            | 70150073 | A | 0.5  | 0.5    | G |
| 10 | BICF2P547355            | 70167598 | T | 0    | 0      | A |
| 10 | BICF2P258761            | 70175632 | A | 0    | 0      | G |
| 10 | BICF2P989049            | 70184743 | C | 0.25 | 0.2857 | A |
| 10 | BICF2P121051            | 70202846 | A | 0    | 0      | G |
| 10 | BICF2P121050            | 70202953 | G | 0    | 0      | A |
| 10 | BICF2P383148            | 70211548 | C | 0.25 | 0.2143 | A |



|    |                         |          |   |      |        |   |
|----|-------------------------|----------|---|------|--------|---|
| 10 | BICF2S23423946          | 70215620 | G | 0.5  | 0.5    | A |
| 10 | BICF2S23716167          | 70226695 | G | 0.25 | 0.2857 | C |
| 10 | BICF2S23326688          | 70234300 | A | 0    | 0      | G |
| 10 | BICF2S23638251          | 70247328 | A | 0    | 0      | C |
| 10 | BICF2P1072013           | 70264173 | A | 0    | 0      | G |
| 10 | BICF2P1072015           | 70265330 | A | 0    | 0      | G |
| 10 | BICF2P14998             | 70280672 | A | 0    | 0      | G |
| 10 | BICF2P1205673           | 70290497 | A | 0.75 | 0.7857 | T |
| 10 | BICF2P1150913           | 70301243 | O | 0    | 0      | A |
| 10 | BICF2P911270            | 70319982 | A | 0.5  | 0.5    | G |
| 10 | BICF2S23432760          | 70326872 | G | 0.5  | 0.5    | A |
| 10 | BICF2P104299            | 70334793 | O | 0    | 0      | C |
| 10 | BICF2S23232095          | 70347403 | A | 0.5  | 0.5    | G |
| 10 | BICF2S23762545          | 70365074 | G | 0    | 0      | A |
| 10 | BICF2S23761795          | 70368997 | A | 0    | 0      | G |
| 10 | BICF2S23653520          | 70382013 | A | 0    | 0      | G |
| 10 | BICF2P1392963           | 70390190 | A | 0.5  | 0.5    | C |
| 10 | BICF2P968718            | 70431098 | G | 0.25 | 0.2143 | A |
| 10 | BICF2P112091            | 70438598 | A | 0    | 0      | G |
| 10 | BICF2P598228            | 70451076 | A | 0    | 0      | T |
| 10 | BICF2S23330379          | 70460506 | A | 0.5  | 0.5    | G |
| 10 | BICF2S23636815          | 70473545 | O | 0    | 0      | G |
| 10 | BICF2S23056939          | 70494601 | A | 0.75 | 0.7143 | G |
| 10 | BICF2P440252            | 70519661 | G | 0.25 | 0.2143 | C |
| 10 | BICF2P713355            | 70547644 | G | 1    | 1      | A |
| 10 | BICF2P1303845           | 70555546 | G | 0    | 0      | A |
| 10 | TIGRP2P142089_rs8676694 | 70564410 | C | 0    | 0      | A |
| 10 | TIGRP2P142096_rs8767181 | 70578262 | G | 0.25 | 0.2143 | A |
| 10 | BICF2P592936            | 70592903 | A | 0.5  | 0.5    | C |
| 10 | TIGRP2P142105_rs9053078 | 70610564 | G | 0    | 0      | A |
| 10 | BICF2S23452165          | 70630270 | A | 0.75 | 0.7857 | G |
| 10 | BICF2P286088            | 70640884 | A | 0    | 0      | G |
| 10 | BICF2S23649210          | 70659586 | A | 0.75 | 0.7857 | C |
| 10 | BICF2P885832            | 70668595 | O | 0    | 0      | C |
| 10 | BICF2P663203            | 70696871 | A | 0.5  | 0.5    | G |
| 10 | BICF2P41585             | 70705300 | G | 0.75 | 0.7857 | A |
| 10 | BICF2S23425562          | 70724149 | A | 0    | 0      | G |
| 10 | BICF2S23013811          | 70741972 | A | 0    | 0      | G |
| 10 | BICF2P406706            | 70751375 | A | 0.25 | 0.2143 | G |
| 10 | TIGRP2P142169_rs8803154 | 70770416 | A | 0.5  | 0.5    | G |
| 10 | BICF2S23435360          | 70772181 | A | 0    | 0      | G |
| 10 | TIGRP2P142194_rs8968570 | 70788699 | G | 0.25 | 0.2857 | A |
| 10 | BICF2S23544332          | 70802022 | G | 0.5  | 0.5    | A |
| 10 | TIGRP2P142199_rs9190244 | 70815369 | G | 0    | 0      | A |
| 10 | BICF2P930620            | 70820196 | A | 0    | 0      | G |
| 10 | BICF2P549709            | 70836821 | A | 0    | 0      | G |
| 10 | BICF2P1380678           | 70843373 | A | 0.75 | 0.7143 | G |

|    |                         |          |   |      |        |   |
|----|-------------------------|----------|---|------|--------|---|
| 10 | BICF2P38356             | 70870913 | A | 0.25 | 0.2857 | G |
| 10 | BICF2S23548142          | 70879700 | G | 0.25 | 0.2857 | A |
| 10 | TIGRP2P142246_rs9132132 | 70886781 | A | 0.25 | 0.2143 | G |
| 10 | BICF2S23215125          | 70897713 | A | 0    | 0      | G |
| 10 | BICF2P1051161           | 70920161 | A | 0.25 | 0.2143 | G |
| 10 | BICF2P339814            | 70925841 | A | 0    | 0      | G |
| 10 | BICF2S23220915          | 70935630 | A | 0.75 | 0.7143 | G |
| 10 | BICF2P2915              | 70943703 | A | 0    | 0      | G |
| 10 | BICF2P1220758           | 70965502 | A | 0.25 | 0.2857 | C |
| 10 | BICF2P721092            | 70977442 | A | 0    | 0      | G |
| 10 | TIGRP2P142322_rs8819312 | 70987501 | A | 0    | 0      | G |
| 10 | TIGRP2P142332_rs8870965 | 70996944 | A | 0    | 0      | G |
| 10 | TIGRP2P142342_rs8527080 | 71008842 | A | 0    | 0      | G |
| 10 | TIGRP2P142346_rs8697788 | 71018609 | A | 0    | 0      | G |
| 10 | BICF2S23045376          | 71024738 | G | 0.25 | 0.2857 | A |
| 10 | BICF2P1335408           | 71027400 | A | 0    | 0      | G |
| 10 | BICF2P709640            | 71038731 | A | 0.25 | 0.2857 | C |
| 10 | BICF2P867718            | 71054115 | G | 1    | 1      | A |
| 10 | BICF2P1147579           | 71063768 | G | 0.75 | 0.7143 | A |
| 10 | BICF2P606142            | 71074074 | A | 0.25 | 0.2143 | G |
| 10 | BICF2P893147            | 71082800 | A | 0.25 | 0.2857 | G |
| 10 | BICF2S23141787          | 71094481 | G | 0.25 | 0.2143 | A |
| 10 | BICF2P1347037           | 71110517 | A | 0    | 0      | G |
| 10 | BICF2P856970            | 71114695 | A | 0.25 | 0.2857 | G |
| 10 | BICF2P611615            | 71126246 | A | 1    | 1      | G |
| 10 | BICF2S23752819          | 71131667 | A | 0.25 | 0.2857 | G |
| 10 | BICF2G630492620         | 71149708 | G | 0.75 | 0.7857 | A |
| 10 | BICF2G630492623         | 71150964 | A | 0.25 | 0.2857 | G |
| 10 | BICF2G630492634         | 71165893 | A | 1    | 0.7143 | G |
| 10 | BICF2G630492647         | 71174903 | G | 1    | 1      | A |
| 10 | BICF2G630492648         | 71175503 | C | 1    | 1      | A |
| 10 | BICF2P1072005           | 71194606 | G | 0.5  | 0.5    | A |
| 10 | BICF2P156879            | 71202258 | A | 0.5  | 0.5    | G |
| 10 | BICF2G630492672         | 71211573 | A | 0    | 0      | C |
| 10 | BICF2G630492681         | 71222698 | A | 0.25 | 0.2857 | G |
| 10 | BICF2G630492691         | 71232445 | A | 0.25 | 0.2857 | G |
| 10 | BICF2S23421837          | 71243059 | G | 0.25 | 0.2857 | A |
| 10 | BICF2G630492706         | 71261011 | C | 0.25 | 0.2857 | A |
| 10 | BICF2G630492714         | 71265882 | A | 0    | 0      | G |
| 10 | BICF2S23619361          | 71279601 | 0 | 0    | 0      | G |
| 10 | BICF2G630492729         | 71293030 | G | NA   | 0.6667 | A |
| 10 | BICF2G630492745         | 71309903 | A | 0.25 | 0.2857 | G |
| 10 | BICF2G630492752         | 71313757 | G | 0.25 | 0.2857 | A |
| 10 | BICF2G630492775         | 71327343 | A | 0    | 0      | G |
| 10 | BICF2G630492788         | 71338031 | 0 | 0    | 0      | G |
| 10 | TIGRP2P142511_rs9033005 | 71346290 | G | 0.25 | 0.2143 | A |
| 10 | BICF2G630492831         | 71357594 | A | 0.5  | 0.5    | G |

|    |                         |          |   |      |        |   |
|----|-------------------------|----------|---|------|--------|---|
| 10 | BICF2G630492844         | 71360359 | G | 0.5  | 0.5    | A |
| 10 | BICF2S23419942          | 71371811 | A | 0.25 | 0.1667 | G |
| 10 | BICF2S23348910          | 71384164 | A | 0.5  | 0.5    | G |
| 10 | BICF2P668598            | 71392546 | A | 0.25 | 0.2143 | C |
| 10 | BICF2G630492894         | 71405356 | A | 0.5  | 0.5833 | G |
| 10 | BICF2G630492915         | 71416577 | A | 0.25 | 0.2857 | G |
| 10 | BICF2G630492920         | 71434651 | G | 0.75 | 0.7143 | A |
| 10 | BICF2G630492931         | 71440956 | A | 0    | 0.25   | G |
| 10 | BICF2G630492949         | 71446224 | A | 0.25 | 0.2857 | G |
| 10 | BICF2G630492956         | 71451050 | G | 0.75 | 0.7143 | A |
| 10 | BICF2S23213424          | 71465347 | G | 1    | 1      | A |
| 10 | BICF2G630493007         | 71487832 | A | 0.75 | 0.7857 | G |
| 10 | BICF2G630493025         | 71504391 | A | 1    | 1      | G |
| 10 | BICF2P1167486           | 71507070 | A | 1    | 1      | G |
| 10 | TIGRP2P142578_rs8876627 | 71527552 | 0 | 0    | 0      | A |
| 10 | BICF2G630493059         | 71527667 | C | 0.5  | 0.5    | A |
| 10 | BICF2S23435141          | 71530212 | A | 0.5  | 0.5    | G |
| 10 | BICF2G630493067         | 71550140 | A | 0.25 | 0.2857 | G |
| 10 | BICF2G630493088         | 71559113 | A | 0.5  | 0.5    | G |
| 10 | BICF2G630493152         | 71593982 | G | 0    | 0      | A |
| 10 | BICF2G630493155         | 71604232 | G | 0.5  | 0.5    | A |
| 10 | BICF2S2334722           | 71611932 | A | 0    | 0      | G |
| 10 | BICF2G630493156         | 71623396 | G | 0    | 0      | A |
| 10 | TIGRP2P142619_rs8837356 | 71637716 | G | 0    | 0      | A |
| 10 | BICF2P572537            | 71650258 | G | 0    | 0      | A |
| 10 | BICF2P855401            | 71661013 | 0 | 0    | 0      | A |
| 10 | BICF2P187729            | 71678031 | G | 0    | 0      | A |
| 10 | BICF2G630493171         | 71686805 | A | 0.25 | 0.2143 | C |
| 10 | BICF2G630493180         | 71695374 | G | 0.25 | 0.2143 | A |
| 10 | BICF2G630493200         | 71713717 | A | 0    | 0      | G |
| 10 | BICF2G630493203         | 71715688 | A | 0    | 0      | G |
| 10 | BICF2G630493257         | 71747594 | G | 0    | 0      | A |
| 10 | BICF2P1282251           | 71755255 | A | 0.5  | 0.5714 | G |
| 10 | BICF2G630493290         | 71763448 | T | 0    | 0      | A |
| 10 | BICF2P668033            | 71775550 | A | 0    | 0      | C |
| 10 | BICF2G630493321         | 71785831 | A | 1    | 1      | C |
| 10 | BICF2G630493342         | 71794972 | A | 1    | 1      | G |
| 10 | BICF2P490104            | 71810355 | G | 0.75 | 0.7143 | A |
| 10 | TIGRP2P142684_rs9043843 | 71857002 | A | 0    | 0      | G |
| 10 | BICF2P945003            | 71874923 | C | 0    | 0      | G |
| 10 | BICF2P635140            | 71882669 | G | 0    | 0      | A |
| 10 | BICF2P1381513           | 71893850 | G | 0.25 | 0.2143 | A |
| 10 | BICF2P626018            | 71901708 | G | 0.75 | 0.7857 | A |
| 10 | BICF2G630493392         | 71920115 | A | 0.25 | 0.2857 | G |
| 10 | BICF2G630493397         | 71927508 | A | 0.5  | 0.5    | G |
| 10 | BICF2G630493407         | 71934858 | G | 0.5  | 0.5    | A |
| 10 | BICF2G630493418         | 71945135 | A | 0.5  | 0.5    | G |

|    |                         |          |   |      |        |   |
|----|-------------------------|----------|---|------|--------|---|
| 10 | BICF2G630493435         | 71959156 | G | 0.5  | 0.5    | A |
| 10 | BICF2G630493442         | 71967991 | A | 0    | 0      | G |
| 10 | BICF2G630493464         | 71981077 | G | 0.25 | 0.2143 | C |
| 10 | BICF2G630493479         | 71991029 | G | 0.25 | 0.2857 | A |
| 10 | BICF2G630493487         | 72002528 | C | 0.25 | 0.2857 | A |
| 10 | BICF2G630493531         | 72025606 | A | 0.25 | 0.2857 | G |
| 10 | BICF2P59705             | 72043358 | A | 0    | 0      | C |
| 10 | TIGRP2P142749_rs8522915 | 72050580 | A | 0.75 | 0.7143 | G |
| 10 | TIGRP2P142755_rs9118059 | 72057722 | A | 0    | 0      | G |
| 10 | BICF2P900013            | 72063697 | G | 0    | 0      | A |
| 10 | BICF2P164304            | 72073677 | G | 0    | 0      | A |
| 10 | TIGRP2P142790_rs9081297 | 72091041 | A | 0    | 0      | G |
| 10 | BICF2G630493584         | 72099249 | A | 0    | 0      | G |
| 10 | BICF2P808338            | 72101235 | A | 0    | 0      | G |
| 10 | BICF2P808339            | 72101415 | A | 0    | 0      | G |
| 10 | BICF2G630493609         | 72107750 | G | 0.5  | 0.5    | A |
| 10 | BICF2G630493637         | 72117078 | A | 0    | 0      | G |
| 10 | BICF2G630493672         | 72130512 | G | 0.75 | 0.7143 | A |
| 10 | BICF2P206486            | 72143627 | G | 0    | 0      | A |
| 10 | BICF2G630493701         | 72157638 | G | 0.75 | 0.7857 | A |
| 10 | BICF2P504908            | 72162931 | A | 0    | 0      | C |
| 10 | BICF2G630493744         | 72177241 | G | 0.25 | 0.2143 | A |
| 10 | BICF2G630493755         | 72192602 | A | 1    | 1      | G |
| 10 | BICF2G630493785         | 72213776 | A | 1    | 1      | G |
| 10 | TIGRP2P142851_rs8880694 | 72223171 | C | 0.75 | 0.7857 | A |
| 10 | TIGRP2P142853_rs8787903 | 72231723 | A | 0.75 | 0.7857 | G |
| 10 | BICF2G630493877         | 72248770 | A | 0    | 0      | G |
| 10 | BICF2G630493904         | 72256098 | A | 0.5  | 0.5714 | G |
| 10 | BICF2G630493961         | 72273643 | C | 0    | 0      | A |
| 10 | BICF2G630493964         | 72274570 | G | 0.25 | 0.2143 | A |
| 10 | BICF2S23435776          | 72277420 | C | 0.25 | 0.2857 | A |
| 10 | BICF2S23441702          | 72279612 | G | 0.75 | 0.7143 | A |
| 10 | BICF2G630493999         | 72290075 | A | 0.25 | 0.2857 | G |
| 10 | BICF2G630494028         | 72305748 | A | 0.25 | 0.2857 | G |
| 10 | BICF2P1298014           | 72309352 | G | 0.5  | 0.5    | A |
| 10 | BICF2G630494052         | 72316902 | A | 0.75 | 0.7143 | G |
| 10 | TIGRP2P142914_rs8679424 | 72344455 | G | 0    | 0      | A |
| 10 | BICF2P253037            | 72378836 | 0 | 0    | 0      | C |
| 10 | BICF2G630494064         | 72391908 | A | 0    | 0      | C |
| 10 | BICF2P1180652           | 72397458 | A | 0    | 0      | G |
| 10 | BICF2S2307054           | 72405963 | A | 0    | 0      | G |
| 10 | BICF2S23124788          | 72419055 | G | 0    | 0      | A |
| 10 | BICF2S23658552          | 72438602 | A | 0    | 0      | G |
| 10 | BICF2P1409561           | 72450954 | T | 0    | 0      | A |
| 10 | BICF2G630494083         | 72471775 | G | 0    | 0      | A |
| 10 | BICF2G630494087         | 72474083 | A | 0    | 0      | C |
| 10 | BICF2G630494111         | 72486446 | 0 | 0    | 0      | G |

|    |                         |         |   |      |         |   |
|----|-------------------------|---------|---|------|---------|---|
| 11 | BICF2P668751            | 3047852 | A | 0.5  | 0       | G |
| 11 | BICF2P319972            | 3123609 | A | 0.5  | 0.08333 | C |
| 11 | BICF2P270425            | 3160933 | A | 0.75 | 0.7857  | T |
| 11 | BICF2P222415            | 3180398 | 0 | 0    | 0       | G |
| 11 | BICF2P1092406           | 3250471 | C | 0.5  | 0.1429  | A |
| 11 | BICF2P41395             | 3273054 | 0 | 0    | 0       | A |
| 11 | G618f8S209              | 3302821 | 0 | 0    | 0       | C |
| 11 | G619f8S149              | 3329375 | 0 | 0    | 0       | C |
| 11 | G620f20S181             | 3374543 | 0 | 0    | 0       | C |
| 11 | BICF2S2306756           | 3393149 | A | 0.5  | 0.1429  | C |
| 11 | BICF2P757289            | 3406727 | A | 0.25 | 0.2143  | G |
| 11 | BICF2P109854            | 3418692 | G | 0.5  | 0.1429  | A |
| 11 | BICF2P368048            | 3432890 | A | 0.25 | 0.2143  | G |
| 11 | BICF2P771981            | 3445531 | 0 | 0    | 0       | G |
| 11 | BICF2P1143274           | 3461111 | 0 | 0    | 0       | A |
| 11 | BICF2S22950773          | 3476047 | A | 0.25 | 0.6429  | G |
| 11 | BICF2S2341930           | 3524160 | C | 0.25 | 0.6429  | G |
| 11 | BICF2P1287750           | 3575010 | 0 | 0    | 0       | C |
| 11 | BICF2P214336            | 3712613 | G | 1    | 0.4     | A |
| 11 | BICF2G63027441          | 3751303 | G | 0    | 0       | A |
| 11 | BICF2P1069149           | 3775338 | 0 | 0    | 0       | A |
| 11 | G623f23S172             | 3797509 | 0 | 0    | 0       | C |
| 11 | BICF2S23056694          | 3835514 | C | 0    | 0       | G |
| 11 | BICF2P331249            | 3860994 | T | 0.25 | 0.2143  | A |
| 11 | BICF2P974524            | 3895775 | 0 | 0    | 0       | C |
| 11 | BICF2P800917            | 3907891 | 0 | 0    | 0       | G |
| 11 | BICF2P41060             | 4022660 | A | 0.5  | 0.1429  | G |
| 11 | BICF2P349652            | 4048797 | 0 | 0    | 0       | G |
| 11 | TIGRP2P126405_rs8617006 | 4088072 | 0 | 0    | 0       | G |
| 11 | BICF2P620164            | 4094927 | 0 | 0    | 0       | A |
| 11 | BICF2P1211297           | 4131782 | 0 | 0    | 0       | A |
| 11 | BICF2P1472330           | 4148150 | 0 | 0    | 0       | C |
| 11 | BICF2S23514671          | 4170651 | C | 0    | 0       | A |
| 11 | BICF2S23135525          | 4177209 | A | 0.25 | 0.2143  | G |
| 11 | BICF2S24116836          | 4187710 | G | 0.25 | 0.6429  | A |
| 11 | TIGRP2P144249_rs9038479 | 4199830 | 0 | 0    | 0       | C |
| 11 | TIGRP2P144246_rs8943046 | 4218505 | 0 | 0    | 0       | G |
| 11 | BICF2P1317760           | 4243005 | 0 | 0    | 0       | G |
| 11 | BICF2P1317759           | 4243932 | A | 0.5  | 0.1429  | G |
| 11 | BICF2P89993             | 4276515 | 0 | 0    | 0       | G |
| 11 | BICF2P85357             | 4300151 | 0 | 0    | 0       | G |
| 11 | BICF2P1195278           | 4304846 | A | 0.5  | 0.1429  | G |
| 11 | BICF2P1211034           | 4308755 | A | 0.5  | 0.1429  | C |
| 11 | BICF2P899486            | 4357941 | 0 | 0    | 0       | A |
| 11 | TIGRP2P144235_rs8852329 | 4387938 | 0 | 0    | 0       | A |
| 11 | BICF2P199814            | 4401983 | 0 | 0    | 0       | G |
| 11 | BICF2P216409            | 4407092 | 0 | 0    | 0       | A |

|    |                         |         |   |      |        |   |
|----|-------------------------|---------|---|------|--------|---|
| 11 | BICF2S23530585          | 4433287 | G | 0    | 0      | A |
| 11 | BICF2P208262            | 4441945 | 0 | 0    | 0      | C |
| 11 | BICF2P382716            | 4458354 | 0 | 0    | 0      | A |
| 11 | BICF2P187306            | 4474591 | 0 | 0    | 0      | C |
| 11 | BICF2P169599            | 4492213 | 0 | 0    | 0      | G |
| 11 | BICF2P645088            | 4550792 | 0 | 0    | 0      | C |
| 11 | BICF2P844001            | 4566956 | 0 | 0    | 0      | A |
| 11 | G630f25S79              | 4580164 | 0 | 0    | 0      | A |
| 11 | TIGRP2P143192_rs8550018 | 4614844 | G | NA   | 0      | A |
| 11 | G631f34S254             | 4650742 | 0 | 0    | 0      | A |
| 11 | BICF2P491002            | 4681784 | 0 | 0    | 0      | A |
| 11 | G633f51S270             | 4763383 | 0 | 0    | 0      | C |
| 11 | BICF2S23911110          | 4782291 | 0 | 0    | 0      | G |
| 11 | BICF2P450538            | 4793964 | 0 | 0    | 0      | A |
| 11 | BICF2P1348959           | 4806461 | A | 0.5  | 0.1429 | G |
| 11 | BICF2P184813            | 4810966 | 0 | 0    | 0      | C |
| 11 | BICF2P692941            | 4838627 | 0 | 0    | 0      | C |
| 11 | BICF2P734487            | 4851446 | A | 0.25 | 0.2143 | G |
| 11 | TIGRP2P144055_rs8951880 | 4864196 | 0 | 0    | 0      | G |
| 11 | BICF2P94556             | 4869391 | 0 | 0    | 0      | G |
| 11 | BICF2P54557             | 4875195 | A | 0.25 | 0.2143 | G |
| 11 | BICF2P450874            | 4932136 | 0 | 0    | 0      | G |
| 11 | BICF2S2448146           | 4937172 | A | 0.25 | 0.6429 | G |
| 11 | TIGRP2P144054_rs9015725 | 4953998 | 0 | 0    | 0      | C |
| 11 | TIGRP2P144053_rs8920213 | 4966424 | A | 0.25 | 0.2143 | C |
| 11 | BICF2S23655207          | 4968512 | 0 | 0    | 0      | G |
| 11 | G634f26S181             | 5024116 | 0 | 0    | 0      | C |
| 11 | BICF2S23038144          | 5047109 | C | 0.25 | 0.6429 | A |
| 11 | BICF2P20201             | 5166275 | A | 0.5  | 0.1429 | C |
| 11 | BICF2P605713            | 5183553 | C | 0.25 | 0.2143 | G |
| 11 | BICF2P1108445           | 5215099 | G | 0.5  | 0.1429 | A |
| 11 | BICF2P1123767           | 5223500 | A | 0.25 | 0.2143 | G |
| 11 | BICF2P685844            | 5254236 | G | 0.75 | 0.7857 | A |
| 11 | BICF2P164344            | 5263222 | G | 0.75 | 0.7857 | A |
| 11 | BICF2S2296204           | 5269181 | G | 0.5  | 0.1429 | A |
| 11 | BICF2P1447864           | 5277832 | G | 0.5  | 0.1429 | A |
| 11 | BICF2P214896            | 5289066 | A | 0.5  | 0.1429 | G |
| 11 | BICF2P706947            | 5294577 | A | 0.5  | 0.1429 | G |
| 11 | BICF2P409939            | 5309861 | A | 0.25 | 0.2143 | G |
| 11 | BICF2P844586            | 5314961 | 0 | 0    | 0      | G |
| 11 | TIGRP2P150135_rs8512833 | 5327776 | 0 | 0    | 0      | C |
| 11 | BICF2S2459404           | 5332791 | C | 0.5  | 0.1429 | G |
| 11 | BICF2P390247            | 5355019 | A | 0.5  | 0.1429 | T |
| 11 | BICF2P577619            | 5365397 | A | 0.5  | 0.1429 | T |
| 11 | BICF2P1428057           | 5378849 | G | 0.75 | 0.7857 | A |
| 11 | BICF2P156101            | 5387883 | 0 | 0    | 0      | G |
| 11 | BICF2P401711            | 5396693 | A | 0.5  | 0.1429 | C |

|    |                         |         |   |      |         |   |
|----|-------------------------|---------|---|------|---------|---|
| 11 | BICF2P974873            | 5408404 | A | 0.5  | 0.1429  | C |
| 11 | BICF2P178197            | 5416597 | A | 0.5  | 0.1429  | G |
| 11 | BICF2P851010            | 5430708 | G | 0.5  | 0.1429  | A |
| 11 | BICF2S2301364           | 5444596 | G | 0.5  | 0.1429  | A |
| 11 | BICF2P1315481           | 5459294 | A | 0.5  | 0.1429  | C |
| 11 | BICF2P332173            | 5465032 | G | 0.5  | 0.1429  | A |
| 11 | BICF2P978958            | 5479765 | 0 | 0    | 0       | G |
| 11 | TIGRP2P150124_rs9190374 | 5496803 | A | 0.25 | 0.6429  | G |
| 11 | BICF2P200797            | 5497416 | A | 0.5  | 0.1429  | G |
| 11 | BICF2P884769            | 5525910 | A | 0.5  | 0.08333 | G |
| 11 | TIGRP2P150122_rs8885002 | 5550265 | 0 | 0    | 0       | A |
| 11 | BICF2P239808            | 5582160 | 0 | 0    | 0       | G |
| 11 | TIGRP2P150120_rs8971374 | 5592738 | A | 0.25 | 0.2143  | G |
| 11 | BICF2S2393608           | 5604031 | 0 | 0    | 0       | A |
| 11 | BICF2S23439277          | 5614265 | A | 0    | 0       | C |
| 11 | BICF2P786038            | 5642298 | 0 | 0    | 0       | C |
| 11 | BICF2P771704            | 5662400 | 0 | 0    | 0       | A |
| 11 | BICF2P1098772           | 5675223 | A | 0.75 | 0.7857  | G |
| 11 | BICF2P1288573           | 5710859 | G | 0.5  | 0.1429  | A |
| 11 | BICF2P700503            | 5750941 | A | 0.5  | 0.1429  | G |
| 11 | TIGRP2P150109_rs8767282 | 5764105 | 0 | 0    | 0       | C |
| 11 | BICF2P1406089           | 5774732 | 0 | 0    | 0       | G |
| 11 | BICF2S2451624           | 5813010 | C | 0    | 0       | A |
| 11 | TIGRP2P150106_rs8996680 | 5830661 | A | 0.75 | 0.7857  | G |
| 11 | BICF2P1173378           | 5848248 | A | 0.5  | 0.625   | G |
| 11 | BICF2P108034            | 5867323 | A | 0.25 | 0.2143  | G |
| 11 | BICF2S23425079          | 5915508 | G | 0    | 0       | A |
| 11 | BICF2P571357            | 5922506 | 0 | 0    | 0       | A |
| 11 | TIGRP2P150098_rs9131527 | 5937199 | A | 0.25 | 0.2143  | G |
| 11 | BICF2P702331            | 5966274 | A | 0.75 | 0.7857  | G |
| 11 | BICF2P1183058           | 5988821 | A | 0.75 | 0.7857  | G |
| 11 | BICF2P1309764           | 6010076 | A | 0.75 | 0.7857  | G |
| 11 | BICF2P438566            | 6026012 | A | 0.5  | 0.1429  | G |
| 11 | BICF2P1272347           | 6044781 | G | 0.5  | 0.1429  | A |
| 11 | BICF2P1004406           | 6056722 | G | 0.25 | 0.2143  | A |
| 11 | BICF2P1315236           | 6066515 | 0 | 0    | 0       | A |
| 11 | BICF2P1192114           | 6094766 | A | 0.5  | 0.1429  | C |
| 11 | BICF2P1431816           | 6101124 | 0 | 0    | 0       | G |
| 11 | BICF2P355627            | 6124244 | C | 0.25 | 0.2143  | A |
| 11 | BICF2P309441            | 6133138 | G | 0.25 | 0.2143  | A |
| 11 | BICF2P329896            | 6142749 | A | 0.25 | 0.2143  | G |
| 11 | BICF2S23060166          | 6170518 | G | 0.75 | 0.3571  | A |
| 11 | BICF2P392930            | 6186787 | A | 0.25 | 0.2143  | C |
| 11 | BICF2S22955679          | 6189018 | T | 0.75 | 0.3571  | A |
| 11 | BICF2P1362530           | 6201031 | 0 | 0    | 0       | A |
| 11 | BICF2P337855            | 6214953 | A | 0.5  | 0.1429  | T |
| 11 | BICF2P814387            | 6222754 | A | 0.25 | 0.2143  | G |

|    |                         |         |   |      |        |   |
|----|-------------------------|---------|---|------|--------|---|
| 11 | BICF2S23647308          | 6234780 | G | 0.75 | 0.3571 | A |
| 11 | TIGRP2P150060_rs8971641 | 6246243 | A | 0.5  | 0.1429 | C |
| 11 | BICF2P970573            | 6256609 | G | 0.5  | 0.1429 | A |
| 11 | BICF2S2436185           | 6274337 | G | 0    | 0      | A |
| 11 | BICF2P1086529           | 6283243 | G | 0.5  | 0.1429 | A |
| 11 | BICF2P129298            | 6323126 | 0 | 0    | 0      | G |
| 11 | G639f28S293             | 6363434 | 0 | 0    | 0      | A |
| 11 | BICF2S23117426          | 6417074 | A | 0    | 0      | G |
| 11 | BICF2P1130215           | 6458144 | A | 0.5  | 0.1429 | G |
| 11 | BICF2S2328939           | 6482506 | A | 0.25 | 0.6429 | C |
| 11 | BICF2S2367390           | 6490115 | G | 0.25 | 0.6429 | A |
| 11 | BICF2P1061328           | 6506732 | 0 | 0    | 0      | G |
| 11 | BICF2P1278249           | 6517414 | 0 | 0    | 0      | A |
| 11 | BICF2P1194233           | 6525275 | A | 0.5  | 0.1429 | G |
| 11 | BICF2S2352244           | 6550553 | A | 0    | 0      | G |
| 11 | TIGRP2P150039_rs8663792 | 6591291 | G | 0.5  | 0.1429 | A |
| 11 | BICF2S2321420           | 6615948 | T | 0.25 | 0.6429 | A |
| 11 | G641f37S153             | 6643367 | A | 0.25 | 0.6429 | G |
| 11 | BICF2P107439            | 6686422 | 0 | 0    | 0      | G |
| 11 | BICF2S2454483           | 6712664 | 0 | 0    | 0      | G |
| 11 | BICF2P1032951           | 6722328 | 0 | 0    | 0      | A |
| 11 | BICF2S23056179          | 6779648 | C | 0    | 0      | A |
| 11 | BICF2S23212641          | 6809360 | A | 0    | 0.6667 | G |
| 11 | BICF2S23255043          | 6833167 | A | 0    | 0      | G |
| 11 | BICF2S23522651          | 6847619 | C | 0    | 0      | A |
| 11 | BICF2P932987            | 6854917 | 0 | 0    | 0      | C |
| 11 | BICF2S23256864          | 6878884 | G | 0    | 0      | A |
| 11 | TIGRP2P150033_rs8781834 | 6918331 | G | 0.75 | 0.7857 | A |
| 11 | TIGRP2P150032_rs8834298 | 6927849 | 0 | 0    | 0      | G |
| 11 | BICF2S23535295          | 6975739 | 0 | 0    | 0      | A |
| 11 | BICF2S2442173           | 6995549 | 0 | 0    | 0      | A |
| 11 | BICF2S23037464          | 7003769 | A | 0    | 0      | C |
| 11 | BICF2S2323535           | 7023853 | C | 0    | 0      | A |
| 11 | TIGRP2P150029_rs8677473 | 7092018 | A | 0.75 | 0.7857 | C |
| 11 | BICF2P1061554           | 7100426 | G | 0    | 0.1667 | A |
| 11 | BICF2P229728            | 7112476 | G | 0.25 | 0.1667 | A |
| 11 | BICF2P574398            | 7125137 | G | 0.25 | 0.2143 | A |
| 11 | BICF2P114041            | 7141158 | G | 0.25 | 0.2143 | A |
| 11 | TIGRP2P150019_rs8881402 | 7158381 | A | 0.25 | 0.2143 | G |
| 11 | BICF2P997679            | 7171601 | G | 0.25 | 0.2143 | A |
| 11 | BICF2P1321472           | 7201372 | G | 0.25 | 0.2143 | A |
| 11 | TIGRP2P150006_rs8966189 | 7211434 | G | 0.25 | 0.2143 | A |
| 11 | TIGRP2P150001_rs8940057 | 7223302 | G | 0.25 | 0.2143 | A |
| 11 | BICF2P428466            | 7236992 | A | 0.25 | 0.2143 | G |
| 11 | BICF2P79517             | 7245589 | G | 0    | 0      | A |
| 11 | BICF2S23445920          | 7261843 | C | 0.25 | 0.6429 | A |
| 11 | BICF2P944027            | 7278626 | 0 | 0    | 0      | T |



|    |                         |         |   |      |        |   |
|----|-------------------------|---------|---|------|--------|---|
| 11 | G643f57S97              | 7302180 | 0 | 0    | 0      | A |
| 11 | G643f60S183             | 7303349 | A | 0    | 0      | G |
| 11 | BICF2P44194             | 7324217 | 0 | 0    | 0      | G |
| 11 | BICF2S23914471          | 7326005 | C | 0    | 0      | A |
| 11 | G644f48S19              | 7348768 | 0 | 0    | 0      | A |
| 11 | BICF2P623647            | 7374170 | 0 | 0    | 0      | A |
| 11 | BICF2P102045            | 7390910 | 0 | 0    | 0      | A |
| 11 | TIGRP2P149977_rs8821762 | 7399029 | G | 0.25 | 0.1667 | A |
| 11 | BICF2P562545            | 7421268 | 0 | 0    | 0      | G |
| 11 | G646f23S228             | 7504714 | A | 0    | 0      | C |
| 11 | BICF2S2366868           | 7525415 | A | 0.75 | 0.3571 | G |
| 11 | BICF2P953472            | 7534034 | 0 | 0    | 0      | T |
| 11 | BICF2P212986            | 7550478 | 0 | 0    | 0      | A |
| 11 | BICF2S2395925           | 7563649 | 0 | 0    | 0      | A |
| 11 | BICF2P151876            | 7569487 | A | 0.25 | 0.2143 | C |
| 11 | BICF2P748969            | 7605116 | A | 0    | 0      | G |
| 11 | BICF2P311414            | 7622205 | 0 | 0    | 0      | A |
| 11 | TIGRP2P149969_rs9120182 | 7640067 | A | 0.75 | 0.3571 | G |
| 11 | TIGRP2P149965_rs8557225 | 7649375 | A | 0.75 | 0.3571 | G |
| 11 | BICF2P604103            | 7672232 | G | 0.75 | 0.3571 | A |
| 11 | BICF2S23256530          | 7682107 | A | 0.75 | 0.3571 | G |
| 11 | BICF2P1414918           | 7693729 | A | 0.75 | 0.3571 | G |
| 11 | TIGRP2P149951_rs8705639 | 7712979 | A | 0.75 | 0.3    | G |
| 11 | BICF2S2345369           | 7756845 | A | 0    | 0      | G |
| 11 | BICF2S23053077          | 7773796 | A | 0    | 0      | T |
| 11 | BICF2P443478            | 7788629 | 0 | 0    | 0      | A |
| 11 | G647f13S81              | 7816251 | A | 0    | 0      | G |
| 11 | BICF2P10021             | 7847861 | A | 0.25 | 0.2143 | G |
| 11 | BICF2P263686            | 7855584 | G | 0.25 | 0.2143 | A |
| 11 | BICF2S23347594          | 7869247 | A | 0    | 0      | G |
| 11 | BICF2P312478            | 7877510 | G | 0    | 0      | A |
| 11 | TIGRP2P149908_rs8879977 | 7895438 | C | 0    | 0      | A |
| 11 | TIGRP2P149900_rs8769825 | 7903826 | G | 0    | 0      | A |
| 11 | BICF2P132705            | 7916051 | 0 | 0    | 0      | A |
| 11 | BICF2P863101            | 7965751 | 0 | 0    | 0      | A |
| 11 | TIGRP2P149894_rs8643029 | 7989129 | A | 0.25 | 0.6429 | G |
| 11 | BICF2P1053067           | 8000821 | 0 | 0    | 0      | A |
| 11 | BICF2S23049486          | 8011417 | G | 0    | 0      | A |
| 11 | TIGRP2P149892_rs9090105 | 8024904 | A | 0.25 | 0.6429 | C |
| 11 | BICF2P969729            | 8035512 | C | 0.25 | 0.6429 | A |
| 11 | BICF2P1019749           | 8072685 | 0 | 0    | 0      | G |
| 11 | BICF2S23037144          | 8084949 | A | 0.25 | 0.6429 | G |
| 11 | TIGRP2P149887_rs8989157 | 8127675 | 0 | 0    | 0      | G |
| 11 | BICF2S23236581          | 8156137 | A | 0    | 0      | G |
| 11 | BICF2P905805            | 8166624 | C | 0.25 | 0.6429 | A |
| 11 | G649f34S300             | 8188049 | 0 | 0    | 0      | C |
| 11 | BICF2P296142            | 8220673 | 0 | 0    | 0      | C |

|    |                         |         |   |      |        |   |
|----|-------------------------|---------|---|------|--------|---|
| 11 | BICF2S23641373          | 8230525 | 0 | 0    | 0      | A |
| 11 | TIGRP2P149885_rs8912893 | 8236757 | A | 0    | 0      | G |
| 11 | BICF2P545154            | 8263015 | 0 | 0    | 0      | A |
| 11 | BICF2S237605            | 8289691 | A | 0.25 | 0.6429 | G |
| 11 | BICF2P276348            | 8296752 | 0 | 0    | 0      | A |
| 11 | BICF2S23151669          | 8317669 | A | 0.25 | 0.6429 | G |
| 11 | BICF2S2338108           | 8322404 | A | 0.75 | 0.8333 | G |
| 11 | TIGRP2P149879_rs8619106 | 8326881 | 0 | 0    | 0      | A |
| 11 | BICF2P937814            | 8357855 | 0 | 0    | 0      | G |
| 11 | TIGRP2P149873_rs8525406 | 8371974 | A | 0    | 0      | C |
| 11 | TIGRP2P149872_rs9232182 | 8379018 | A | 0.25 | 0.6429 | G |
| 11 | BICF2P1312272           | 8399868 | A | 0    | 0      | C |
| 11 | BICF2P1287143           | 8421192 | 0 | 0    | 0      | G |
| 11 | BICF2P1045378           | 8430769 | 0 | 0    | 0      | C |
| 11 | BICF2S22931044          | 8447576 | C | 0.75 | 0.7857 | A |
| 11 | TIGRP2P149866_rs9009656 | 8511195 | G | 0    | 0      | A |
| 11 | BICF2P1137579           | 8524515 | 0 | 0    | 0      | A |
| 11 | BICF2P371490            | 8538588 | A | 0    | 0      | G |
| 11 | BICF2P337100            | 8573167 | 0 | 0    | 0      | A |
| 11 | TIGRP2P149861_rs8633543 | 8597183 | 0 | 0    | 0      | G |
| 11 | BICF2P625025            | 8602927 | 0 | 0    | 0      | A |
| 11 | TIGRP2P149860_rs8970013 | 8614734 | 0 | 0    | 0      | G |
| 11 | G651f11S91              | 8637907 | A | 0    | 0      | C |
| 11 | BICF2P97412             | 8659922 | 0 | 0    | 0      | G |
| 11 | BICF2P982266            | 8706562 | A | 0    | 0      | G |
| 11 | BICF2P1291203           | 8725066 | G | 0    | 0      | A |
| 11 | BICF2P875466            | 8738955 | G | 0    | 0      | A |
| 11 | BICF2P708760            | 8742389 | A | 0    | 0      | G |
| 11 | BICF2P708761            | 8743127 | A | 0    | 0      | T |
| 11 | BICF2P666438            | 8782440 | G | 0    | 0      | A |
| 11 | TIGRP2P149835_rs8919112 | 8795752 | 0 | 0    | 0      | G |
| 11 | BICF2P404366            | 8822742 | G | 0.25 | 0.2143 | A |
| 11 | BICF2S2299721           | 8842658 | G | 0    | 0.2143 | A |
| 11 | BICF2P329587            | 8922437 | 0 | 0    | 0      | A |
| 11 | BICF2P476049            | 8924568 | 0 | 0    | 0      | G |
| 11 | BICF2P361106            | 8978130 | 0 | 0    | 0      | G |
| 11 | BICF2P1125455           | 9015515 | C | 0.25 | 0.2143 | A |
| 11 | TIGRP2P149822_rs8823669 | 9036650 | G | 0.25 | 0.1667 | A |
| 11 | TIGRP2P149820_rs8856077 | 9039657 | A | 0.25 | 0.2143 | G |
| 11 | BICF2P653018            | 9063908 | 0 | 0    | 0      | C |
| 11 | BICF2S22939919          | 9080450 | G | 0    | 0      | A |
| 11 | BICF2P399524            | 9110062 | A | 0    | 0      | G |
| 11 | BICF2P967591            | 9120094 | G | 0    | 0      | A |
| 11 | BICF2P1373234           | 9140828 | G | 0.75 | 0.3571 | A |
| 11 | BICF2P1304130           | 9163839 | A | 0.75 | 0.3571 | G |
| 11 | BICF2P647240            | 9173664 | A | 0.75 | 0.3571 | G |
| 11 | BICF2S23614480          | 9183810 | A | 0    | 0      | G |

|    |                         |         |   |      |        |   |
|----|-------------------------|---------|---|------|--------|---|
| 11 | TIGRP2P149796_rs9178510 | 9188808 | 0 | 0    | 0      | G |
| 11 | TIGRP2P149793_rs8653478 | 9222032 | 0 | 0    | 0      | A |
| 11 | BICF2P745563            | 9272260 | A | 0    | 0      | G |
| 11 | BICF2P202293            | 9290409 | 0 | 0    | 0      | A |
| 11 | G653f34S339             | 9313611 | A | 0    | 0      | G |
| 11 | G653f38S70              | 9315900 | 0 | 0    | 0      | C |
| 11 | BICF2P1092835           | 9335666 | 0 | 0    | 0      | A |
| 11 | BICF2S23331719          | 9340841 | A | 0.5  | 0.1429 | G |
| 11 | BICF2P1109603           | 9354547 | A | 0.75 | 0.3571 | G |
| 11 | BICF2P104187            | 9365462 | C | 0.5  | 0.8571 | A |
| 11 | BICF2P1300227           | 9375896 | A | 0    | 0      | C |
| 11 | TIGRP2P149748_rs8759820 | 9419550 | A | 0    | 0      | G |
| 11 | BICF2S23044928          | 9448725 | G | 0    | 0      | A |
| 11 | BICF2P1445173           | 9464756 | A | 0    | 0      | G |
| 11 | G654f30S200             | 9494037 | G | 0.75 | 0.7857 | A |
| 11 | G654f31S297             | 9499940 | 0 | 0    | 0      | C |
| 11 | TIGRP2P149702_rs9055620 | 9527454 | G | 0    | 0      | A |
| 11 | TIGRP2P149690_rs8723656 | 9537155 | A | 0    | 0      | C |
| 11 | BICF2P205369            | 9542583 | G | 0    | 0      | A |
| 11 | TIGRP2P149688_rs8913494 | 9554324 | 0 | 0    | 0      | A |
| 11 | BICF2P387069            | 9570129 | A | 0.25 | 0.2143 | C |
| 11 | BICF2P689972            | 9584338 | G | 0.25 | 0.2143 | A |
| 11 | BICF2P90635             | 9593705 | A | 0.75 | 0.3571 | G |
| 11 | TIGRP2P149664_rs8806551 | 9608074 | G | 0.25 | 0.6429 | A |
| 11 | BICF2P12726             | 9624107 | G | 0.25 | 0.6429 | A |
| 11 | BICF2P1250672           | 9628450 | A | 0.25 | 0.6429 | G |
| 11 | BICF2P56356             | 9639528 | 0 | 0    | 0      | C |
| 11 | BICF2P1371973           | 9659205 | G | 0    | 0      | A |
| 11 | BICF2P353096            | 9666216 | A | 0    | 0      | G |
| 11 | BICF2P765640            | 9685108 | C | 0    | 0      | A |
| 11 | BICF2P1210106           | 9747749 | A | 0    | 0      | G |
| 11 | BICF2P559474            | 9773895 | G | 0    | 0      | A |
| 11 | BICF2P761931            | 9792764 | A | 0.25 | 0.2143 | C |
| 11 | TIGRP2P149623_rs8498194 | 9812792 | 0 | 0    | 0      | A |
| 11 | BICF2P1171484           | 9829119 | G | 0.75 | 0.7857 | A |
| 11 | BICF2P757584            | 9846991 | A | 0    | 0      | G |
| 11 | BICF2P1180450           | 9852928 | A | 0    | 0      | G |
| 11 | BICF2S2367260           | 9857170 | A | 0    | 0      | C |
| 11 | TIGRP2P149596_rs9171257 | 9888366 | A | 0    | 0      | G |
| 11 | BICF2P784281            | 9891485 | G | 0    | 0      | C |
| 11 | BICF2S2378221           | 9911530 | A | 0.5  | 0.1429 | G |
| 11 | BICF2P595504            | 9919070 | A | 0    | 0      | G |
| 11 | BICF2S24310553          | 9941804 | A | 0.5  | 0.1429 | G |
| 11 | BICF2P424379            | 9958112 | 0 | 0    | 0      | G |
| 11 | BICF2S23441547          | 9969034 | C | 0.5  | 0.1429 | A |
| 11 | BICF2P1095229           | 9982729 | A | 0.25 | 0.2143 | G |
| 11 | BICF2S23530639          | 9995856 | 0 | 0    | 0      | A |

|    |                         |          |   |      |        |   |
|----|-------------------------|----------|---|------|--------|---|
| 11 | BICF2P252905            | 10015516 | C | 0    | 0      | A |
| 11 | BICF2S23132776          | 10044032 | C | 0.5  | 0.1429 | A |
| 11 | BICF2P303449            | 10094258 | 0 | 0    | 0      | G |
| 11 | BICF2P1393769           | 10157966 | A | 0    | 0      | G |
| 11 | TIGRP2P143997_rs8810529 | 10180994 | C | 0    | 0      | A |
| 11 | BICF2P331549            | 10214643 | A | 0    | 0      | T |
| 11 | BICF2P478016            | 10224870 | 0 | 0    | 0      | G |
| 11 | BICF2P478017            | 10224894 | G | 0    | 0      | A |
| 11 | TIGRP2P143955_rs8808275 | 10238971 | 0 | 0    | 0      | A |
| 11 | BICF2P457963            | 10247114 | G | 0    | 0      | A |
| 11 | BICF2S22957047          | 10265125 | 0 | 0    | 0      | G |
| 11 | BICF2P103961            | 10273230 | 0 | 0    | 0      | A |
| 11 | BICF2P946175            | 10286106 | G | 0    | 0      | A |
| 11 | BICF2P1209896           | 10308488 | A | 0.75 | 0.7857 | G |
| 11 | BICF2P483570            | 10316412 | G | 1    | 1      | A |
| 11 | BICF2P1116363           | 10328691 | G | 1    | 1      | A |
| 11 | BICF2P1451292           | 10338656 | 0 | 0    | 0      | A |
| 11 | BICF2P269647            | 10366855 | A | 0    | 0      | G |
| 11 | BICF2P330520            | 10376576 | A | 0    | 0      | G |
| 11 | BICF2S22926483          | 10398067 | A | 0    | 0      | G |
| 11 | BICF2P857336            | 10429289 | G | 0    | 0      | A |
| 11 | BICF2P813843            | 10493498 | 0 | 0    | 0      | A |
| 11 | BICF2P1168021           | 10522306 | G | 0    | 0      | A |
| 11 | BICF2P1388743           | 10537956 | A | 0    | 0      | G |
| 11 | BICF2P517621            | 10556010 | G | 0.25 | 0.2143 | A |
| 11 | TIGRP2P143862_rs9236609 | 10578183 | 0 | 0    | 0      | A |
| 11 | TIGRP2P143860_rs8928376 | 10587742 | 0 | 0    | 0      | G |
| 11 | BICF2P652643            | 10606231 | G | 0    | 0      | A |
| 11 | BICF2S2346933           | 10628495 | A | 0.5  | 0.1429 | G |
| 11 | BICF2P603521            | 10639269 | A | 0.5  | 0.1429 | G |
| 11 | BICF2S23311946          | 10650040 | A | 0.5  | 0.1429 | G |
| 11 | BICF2S23725005          | 10660728 | G | 0.5  | 0.1429 | A |
| 11 | BICF2P907243            | 10676988 | A | 0    | 0      | G |
| 11 | BICF2P950535            | 10685349 | G | 0    | 0      | A |
| 11 | BICF2P943776            | 10698810 | G | 0    | 0      | A |
| 11 | BICF2P896857            | 10712715 | A | 0    | 0      | T |
| 11 | BICF2P813269            | 10714654 | A | 0    | 0      | C |
| 11 | BICF2P434950            | 10720693 | C | 0    | 0      | A |
| 11 | TIGRP2P143775_rs8983798 | 10733186 | 0 | 0    | 0      | G |
| 11 | TIGRP2P143773_rs8686387 | 10741443 | 0 | 0    | 0      | A |
| 11 | BICF2P1179027           | 10764657 | 0 | 0    | 0      | A |
| 11 | TIGRP2P143770_rs9075470 | 10807238 | 0 | 0    | 0      | C |
| 11 | BICF2P240708            | 10831053 | G | 0.5  | 0.8571 | A |
| 11 | BICF2S2375692           | 10847813 | 0 | 0    | 0      | A |
| 11 | TIGRP2P143740_rs8682444 | 10873092 | A | 0    | 0.2143 | C |
| 11 | BICF2P1032952           | 10917608 | 0 | 0    | 0      | G |
| 11 | TIGRP2P143719_rs9063853 | 10937466 | A | 1    | 0.8333 | C |

|    |                         |          |   |      |        |   |
|----|-------------------------|----------|---|------|--------|---|
| 11 | BICF2P537892            | 10956970 | 0 | 0    | 0      | A |
| 11 | BICF2P905801            | 10970107 | A | 0    | 0      | G |
| 11 | BICF2P1316073           | 10980119 | G | 0    | 0      | A |
| 11 | TIGRP2P143710_rs9094560 | 10992177 | 0 | 0    | 0      | G |
| 11 | BICF2P1361525           | 11004366 | G | 0.75 | 0.7857 | A |
| 11 | TIGRP2P143705_rs8955063 | 11024616 | 0 | 0    | 0      | G |
| 11 | BICF2P908877            | 11031152 | A | 1    | 1      | G |
| 11 | BICF2S23427144          | 11043187 | G | 0.5  | 0.8571 | C |
| 11 | BICF2P554507            | 11062708 | A | 0.5  | 0.8571 | G |
| 11 | BICF2P600260            | 11069741 | A | 0.5  | 0.8571 | G |
| 11 | BICF2P189495            | 11071523 | A | 0.5  | 0.8571 | G |
| 11 | BICF2P189496            | 11071686 | C | 0.5  | 0.8571 | G |
| 11 | TIGRP2P143682_rs9141144 | 11084586 | A | 0.5  | 0.8571 | C |
| 11 | BICF2S22929038          | 11087996 | G | 0.5  | 0.8571 | A |
| 11 | BICF2P161849            | 11115293 | G | 0.5  | 0.8571 | A |
| 11 | TIGRP2P143667_rs9156200 | 11139211 | A | 1    | 1      | G |
| 11 | TIGRP2P143664_rs8778490 | 11155240 | G | 1    | 1      | A |
| 11 | BICF2P172144            | 11194638 | 0 | 0    | 0      | G |
| 11 | BICF2P879853            | 11213398 | 0 | 0    | 0      | G |
| 11 | BICF2P1246721           | 11236925 | 0 | 0    | 0      | G |
| 11 | BICF2S2356511           | 11266047 | A | 0.5  | 0.8571 | G |
| 11 | BICF2P27672             | 11403968 | G | 0.25 | 0.2143 | A |
| 11 | TIGRP2P143307_rs8760159 | 11413161 | A | 0.5  | 0.1429 | G |
| 11 | BICF2P902821            | 11420641 | G | 0    | 0      | A |
| 11 | BICF2S23659394          | 11445458 | A | 0    | 0      | C |
| 11 | BICF2S23649057          | 11454591 | G | 0.25 | 0.6429 | A |
| 11 | BICF2P1406502           | 11501003 | 0 | 0    | 0      | G |
| 11 | BICF2P648670            | 11516895 | A | 0    | 0      | T |
| 11 | BICF2P561488            | 11540379 | A | 0    | 0      | C |
| 11 | BICF2P251123            | 11574970 | A | 0.5  | 0.1429 | G |
| 11 | BICF2P736413            | 11583869 | G | 0.25 | 0.6429 | A |
| 11 | BICF2P53018             | 11594538 | A | 0    | 0      | G |
| 11 | BICF2P358794            | 11605521 | 0 | 0    | 0      | A |
| 11 | BICF2P1236789           | 11626254 | C | 0.75 | 0.3571 | A |
| 11 | BICF2P1236783           | 11627455 | G | 0.75 | 0.3571 | A |
| 11 | BICF2P492568            | 11640230 | A | 0.5  | 0.1429 | G |
| 11 | TIGRP2P143259_rs8523491 | 11661513 | G | 0.75 | 0.7857 | A |
| 11 | TIGRP2P143254_rs9069524 | 11686594 | G | 0.25 | 0.2143 | A |
| 11 | BICF2P1035249           | 11718405 | 0 | 0    | 0      | G |
| 11 | BICF2P1232126           | 11735084 | A | 0.25 | 0.2143 | G |
| 11 | BICF2P787687            | 11759492 | A | 0.75 | 0.7857 | G |
| 11 | BICF2P622412            | 11776896 | 0 | 0    | 0      | A |
| 11 | BICF2P461273            | 11804524 | A | 1    | 0.7857 | G |
| 11 | BICF2P1008862           | 11852704 | 0 | 0    | 0      | A |
| 11 | BICF2P572679            | 11867703 | G | 0    | 0      | A |
| 11 | BICF2P572680            | 11867758 | G | 0    | 0      | C |
| 11 | BICF2P493988            | 11875309 | A | 0    | 0      | G |

|    |                         |          |   |      |        |   |
|----|-------------------------|----------|---|------|--------|---|
| 11 | TIGRP2P143232_rs8708294 | 11887350 | A | 0    | 0      | T |
| 11 | BICF2S2439215           | 11900186 | A | 0    | 0      | G |
| 11 | BICF2P1272321           | 11921698 | G | 0    | 0      | A |
| 11 | BICF2G63027171          | 11983646 | A | 0.5  | 0.6429 | G |
| 11 | BICF2G630287100         | 12172736 | G | 0.25 | 0.1667 | A |
| 11 | BICF2G630287171         | 12182796 | A | 0.25 | 0.2143 | G |
| 11 | BICF2G630287225         | 12190892 | G | 0    | 0      | A |
| 11 | BICF2G630287518         | 12275750 | 0 | 0    | 0      | G |
| 11 | BICF2G630288477         | 12650626 | G | 0.25 | 0.6429 | A |
| 11 | TIGRP2P145392_rs9253708 | 12673055 | G | 0.25 | 0.6429 | A |
| 11 | TIGRP2P145068_rs9144596 | 12805414 | 0 | 0    | 0      | A |
| 11 | BICF2P487538            | 12843841 | G | 0    | 0      | A |
| 11 | BICF2P499114            | 12845857 | A | 0.5  | 0.6429 | C |
| 11 | BICF2P1000382           | 12867969 | A | 0    | 0      | G |
| 11 | BICF2P1000379           | 12868874 | A | 0    | 0      | G |
| 11 | TIGRP2P145061_rs9212679 | 12885246 | A | 0    | 0      | G |
| 11 | BICF2P1363201           | 12894256 | G | 0.5  | 0.6429 | A |
| 11 | TIGRP2P145042_rs8996851 | 12903743 | G | 0.5  | 0.6429 | A |
| 11 | BICF2S23037520          | 12924948 | A | 0.5  | 0.8571 | C |
| 11 | BICF2P1121645           | 12950208 | A | 0    | 0      | T |
| 11 | BICF2P382427            | 12959928 | G | 0.5  | 0.8571 | A |
| 11 | BICF2P286807            | 12970950 | A | 0.5  | 0.8571 | G |
| 11 | BICF2P1439522           | 12975783 | 0 | 0    | 0      | G |
| 11 | BICF2P116362            | 12993360 | 0 | 0    | 0      | A |
| 11 | BICF2P302412            | 13008065 | C | 0.5  | 0.8571 | A |
| 11 | BICF2P1204535           | 13043617 | A | 0    | 0      | G |
| 11 | BICF2P941128            | 13065274 | G | 0    | 0      | A |
| 11 | BICF2P1291842           | 13091486 | G | 0    | 0      | A |
| 11 | TIGRP2P144985_rs9185164 | 13121296 | G | 0    | 0.2143 | A |
| 11 | BICF2P1250067           | 13157772 | C | 0.5  | 0.1429 | A |
| 11 | TIGRP2P144969_rs8940467 | 13182706 | G | 0.5  | 0.1429 | A |
| 11 | BICF2S23038530          | 13226024 | G | 0.5  | 0.1429 | A |
| 11 | BICF2P283198            | 13241795 | 0 | 0    | 0      | C |
| 11 | TIGRP2P144966_rs8873137 | 13259038 | A | 0    | 0      | G |
| 11 | BICF2G630288899         | 13272603 | A | 0.5  | 0.1429 | G |
| 11 | BICF2G630288912         | 13282918 | C | 0.5  | 0.1429 | A |
| 11 | BICF2P44050             | 13338976 | A | 0.5  | 0.1429 | G |
| 11 | BICF2S22917577          | 13356349 | G | 0.25 | 0.2143 | A |
| 11 | BICF2P1219809           | 13370898 | G | 0.25 | 0.2143 | A |
| 11 | BICF2P984488            | 13375253 | G | 0.25 | 0.2143 | A |
| 11 | BICF2S2362334           | 13386695 | G | 0.25 | 0.2143 | A |
| 11 | BICF2P164587            | 13411399 | G | 0.25 | 0.2143 | A |
| 11 | TIGRP2P144898_rs9036606 | 13479763 | A | 0    | 0      | G |
| 11 | BICF2G630288995         | 13504153 | A | 0    | 0      | G |
| 11 | BICF2G630288999         | 13544944 | A | 0.5  | 0.1429 | G |
| 11 | BICF2P574977            | 13559613 | 0 | 0    | 0      | G |
| 11 | BICF2P830989            | 13811903 | A | 0.75 | 0.75   | G |

|    |                         |          |   |      |        |   |
|----|-------------------------|----------|---|------|--------|---|
| 11 | BICF2P51314             | 14181013 | G | 0    | 0      | A |
| 11 | BICF2G630290157         | 14192846 | A | 0.25 | 0.1667 | G |
| 11 | TIGRP2P146310_rs9227582 | 14205136 | A | 0.5  | 0.875  | C |
| 11 | BICF2G630290317         | 14228128 | G | 0    | 0      | A |
| 11 | BICF2G630290384         | 14237040 | G | 0.75 | 0.8333 | A |
| 11 | BICF2G630290672         | 14306016 | G | 0.25 | 0.2143 | A |
| 11 | BICF2G630291135         | 14449165 | A | 0    | 0      | G |
| 11 | BICF2G630291663         | 14589052 | A | 0    | 0.1    | G |
| 11 | BICF2G630291770         | 14605982 | A | 0    | 0.1667 | C |
| 11 | BICF2G630291870         | 14631071 | G | 0    | 0.25   | A |
| 11 | BICF2G630291939         | 14651422 | G | 0    | 0.25   | A |
| 11 | BICF2S2459118           | 14732716 | A | 0    | 0      | G |
| 11 | BICF2P1412705           | 14848716 | A | 0    | 0      | G |
| 11 | BICF2G630292303         | 14885852 | C | 0.5  | 0.1429 | A |
| 11 | BICF2G630292309         | 14901405 | C | 0.5  | 0.1429 | A |
| 11 | BICF2G630292311         | 14918364 | C | 0    | 0      | A |
| 11 | BICF2G630292315         | 14946104 | G | 0.5  | 0.3571 | A |
| 11 | BICF2G630292318         | 14952108 | G | 0.5  | 0.3571 | A |
| 11 | BICF2G630292322         | 14966785 | A | 0.5  | 0.3571 | G |
| 11 | BICF2P1212252           | 14979188 | A | NA   | 0.3571 | G |
| 11 | BICF2G630292332         | 14999125 | A | 0.5  | 0.3571 | G |
| 11 | BICF2S23215906          | 15029087 | A | 0    | 0      | C |
| 11 | BICF2G630292347         | 15041235 | A | 0.5  | 0.3571 | G |
| 11 | BICF2G630292355         | 15050026 | A | 1    | 1      | G |
| 11 | BICF2G630292358         | 15059651 | G | 0    | 0      | A |
| 11 | BICF2G630292367         | 15076531 | A | 0    | 0      | G |
| 11 | BICF2S22962891          | 15100262 | G | 0.5  | 0.6429 | A |
| 11 | BICF2G630292394         | 15129159 | C | 0    | 0      | A |
| 11 | BICF2P426661            | 15150958 | A | 0    | 0      | G |
| 11 | BICF2G630292470         | 15188946 | G | 0    | 0.2143 | A |
| 11 | BICF2G630292533         | 15226802 | A | 0    | 0      | G |
| 11 | BICF2G630292538         | 15237204 | A | 0    | 0      | G |
| 11 | BICF2G630292544         | 15240338 | A | 0    | 0.2143 | G |
| 11 | BICF2G630292551         | 15250595 | A | 1    | 0.7857 | G |
| 11 | TIGRP2P147455_rs8602758 | 15261663 | G | 0    | 0      | A |
| 11 | BICF2G630292561         | 15273294 | G | 0    | 0.2143 | A |
| 11 | BICF2G630292569         | 15293588 | G | 0    | 0.2143 | A |
| 11 | BICF2G630292579         | 15307687 | A | 0    | 0      | G |
| 11 | BICF2P362572            | 15319790 | G | 0    | 0.2143 | A |
| 11 | BICF2G630292587         | 15336849 | G | 0.5  | 0.1429 | A |
| 11 | TIGRP2P147482_rs9247961 | 15342194 | 0 | 0    | 0      | G |
| 11 | BICF2G630292602         | 15359104 | A | 0.5  | 0.8571 | G |
| 11 | BICF2G630292603         | 15359617 | G | 0.5  | 0.8571 | A |
| 11 | BICF2G630292617         | 15364172 | G | 0.5  | 0.8571 | A |
| 11 | BICF2G630292648         | 15380298 | A | 1    | 1      | G |
| 11 | BICF2G630292693         | 15408162 | A | 0    | 0      | G |
| 11 | TIGRP2P147505_rs8652842 | 15426348 | A | 0    | 0      | G |

|    |                         |          |   |     |        |   |
|----|-------------------------|----------|---|-----|--------|---|
| 11 | BICF2G630292734         | 15444884 | A | 0.5 | 0.9167 | C |
| 11 | BICF2P1375262           | 15467534 | A | 0   | 0      | C |
| 11 | BICF2P1025064           | 15484240 | A | 0   | 0      | G |
| 11 | BICF2G630292744         | 15503040 | A | 0   | 0      | G |
| 11 | BICF2G630292750         | 15540323 | G | 0   | 0      | A |
| 11 | BICF2G630292756         | 15554530 | A | 0   | 0      | G |
| 11 | BICF2G630292757         | 15560503 | G | 0   | 0      | A |
| 11 | TIGRP2P147556_rs8710700 | 15578748 | A | 1   | 1      | C |
| 11 | BICF2P293317            | 15582569 | 0 | 0   | 0      | A |
| 11 | BICF2G630292760         | 15595122 | A | 0   | 0      | G |
| 11 | BICF2S2335596           | 15610842 | A | 0.5 | 0.1429 | G |
| 11 | BICF2P172793            | 15623513 | C | 0   | 0.2143 | A |
| 11 | BICF2P622231            | 15633045 | A | 0.5 | 0.1429 | G |
| 11 | TIGRP2P147568_rs8557609 | 15643171 | A | 0   | 0      | G |
| 11 | BICF2P28000             | 15670912 | 0 | 0   | 0      | G |
| 11 | BICF2P834421            | 15682912 | 0 | 0   | 0      | A |
| 11 | BICF2P438825            | 15699798 | 0 | 0   | 0      | A |
| 11 | TIGRP2P147603_rs9118677 | 15721818 | A | 0   | 0      | G |
| 11 | BICF2P1130863           | 15733388 | T | 0   | 0      | A |
| 11 | TIGRP2P147617_rs8711990 | 15751021 | G | 0   | 0      | A |
| 11 | TIGRP2P147619_rs8823613 | 15755384 | G | 0   | 0      | A |
| 11 | BICF2P57863             | 15773336 | 0 | 0   | 0      | A |
| 11 | TIGRP2P147692_rs8730816 | 15796447 | G | 0.5 | 0.3571 | A |
| 11 | TIGRP2P147693_rs8590186 | 15801312 | 0 | 0   | 0      | A |
| 11 | BICF2P365517            | 15814465 | G | 0.5 | 0.3571 | A |
| 11 | BICF2P759341            | 15836086 | 0 | 0   | 0      | G |
| 11 | BICF2P675972            | 15847620 | 0 | 0   | 0      | C |
| 11 | BICF2P1245754           | 15882374 | G | 0.5 | 0.6429 | A |
| 11 | BICF2S23325890          | 15895610 | A | 0.5 | 0.1429 | G |
| 11 | BICF2G630292798         | 15908515 | A | 0.5 | 0.6429 | G |
| 11 | BICF2G630292801         | 15909365 | A | 0.5 | 0.6429 | G |
| 11 | BICF2G630292831         | 15926136 | 0 | 0   | 0      | G |
| 11 | BICF2P869707            | 15930625 | G | NA  | 0      | A |
| 11 | BICF2G630292847         | 15939865 | G | 0   | 0      | A |
| 11 | BICF2P451372            | 15965158 | G | 0.5 | 0.1429 | A |
| 11 | TIGRP2P147756_rs8549028 | 15989322 | 0 | 0   | 0      | G |
| 11 | TIGRP2P147759_rs8689965 | 15998249 | A | 0.5 | 0.8571 | G |
| 11 | BICF2P551233            | 16008616 | A | 0   | 0      | C |
| 11 | BICF2P868646            | 16027694 | A | 1   | 1      | C |
| 11 | BICF2S23726024          | 16043293 | A | 0.5 | 0.1429 | G |
| 11 | BICF2G630292874         | 16060048 | 0 | 0   | 0      | G |
| 11 | BICF2P1128038           | 16060458 | G | 0   | 0      | A |
| 11 | TIGRP2P147802_rs8850336 | 16066614 | G | 0   | 0      | A |
| 11 | BICF2G630292879         | 16079218 | 0 | 0   | 0      | G |
| 11 | BICF2G630292889         | 16093502 | C | 0   | 0      | A |
| 11 | BICF2G630292892         | 16093654 | A | 0   | 0      | G |
| 11 | BICF2P1161507           | 16107113 | 0 | 0   | 0      | A |



|    |                         |          |   |     |        |   |
|----|-------------------------|----------|---|-----|--------|---|
| 11 | BICF2G630292922         | 16110176 | A | 0   | 0      | G |
| 11 | BICF2G630292923         | 16110198 | C | 0   | 0      | A |
| 11 | BICF2G630292934         | 16118044 | A | 1   | 1      | G |
| 11 | BICF2G630292953         | 16131639 | A | 1   | 1      | G |
| 11 | TIGRP2P147810_rs8558234 | 16139699 | A | 1   | 1      | G |
| 11 | BICF2P1069469           | 16161309 | 0 | 0   | 0      | A |
| 11 | BICF2G630292963         | 16180778 | A | 0   | 0.2143 | G |
| 11 | BICF2P1276082           | 16203584 | 0 | 0   | 0      | A |
| 11 | BICF2S23511471          | 16215647 | A | 0   | 0      | G |
| 11 | BICF2P1020536           | 16254290 | A | 0   | 0.2143 | G |
| 11 | BICF2G630292968         | 16268212 | A | 0   | 0      | T |
| 11 | BICF2G630292972         | 16276040 | G | 0   | 0      | A |
| 11 | BICF2G630293049         | 16319080 | A | 0   | 0      | G |
| 11 | BICF2G630293076         | 16332547 | G | 0.5 | 0.8571 | A |
| 11 | BICF2G630293078         | 16339940 | A | 0.5 | 0.6429 | G |
| 11 | BICF2G630293144         | 16376561 | G | 1   | 0.7    | A |
| 11 | TIGRP2P147940_rs8864445 | 16387559 | A | 0   | 0.2143 | G |
| 11 | BICF2G630293191         | 16402832 | C | 0.5 | 0.6429 | A |
| 11 | BICF2P766408            | 16413910 | C | 0.5 | 0.6667 | A |
| 11 | TIGRP2P147942_rs9157470 | 16423361 | 0 | 0   | 0      | G |
| 11 | BICF2P953808            | 16440917 | G | 0   | 0.2143 | A |
| 11 | BICF2P388825            | 16445027 | 0 | 0   | 0      | A |
| 11 | BICF2G630293222         | 16461381 | 0 | 0   | 0      | G |
| 11 | BICF2P173554            | 16470076 | 0 | 0   | 0      | A |
| 11 | BICF2S23346640          | 16486976 | G | 0.5 | 0.6429 | A |
| 11 | BICF2G630293237         | 16497743 | G | 0.5 | 0.6429 | A |
| 11 | BICF2G630293242         | 16505277 | A | 0.5 | 0.6429 | G |
| 11 | BICF2G630293244         | 16515263 | A | 0.5 | 0.6429 | C |
| 11 | BICF2P202248            | 16533044 | G | 0.5 | 0.6429 | A |
| 11 | BICF2S2358377           | 16537019 | G | 0   | 0      | A |
| 11 | BICF2G630293247         | 16550620 | A | 0   | 0      | G |
| 11 | BICF2S23549178          | 16565912 | T | 0   | 0      | A |
| 11 | BICF2G630293254         | 16596154 | 0 | 0   | 0      | C |
| 11 | BICF2P693130            | 16614363 | G | 0   | 0      | A |
| 11 | BICF2S2302994           | 16620400 | A | 0   | 0      | G |
| 11 | BICF2G630293271         | 16632868 | G | 0   | 0      | A |
| 11 | BICF2G630293272         | 16633047 | G | 0   | 0      | A |
| 11 | TIGRP2P147982_rs9133980 | 16645501 | A | 0   | 0.2143 | G |
| 11 | BICF2S23116542          | 16654514 | C | 1   | 0.7857 | G |
| 11 | BICF2P205003            | 16679868 | A | 1   | 0.7857 | G |
| 11 | BICF2P665812            | 16702376 | 0 | 0   | 0      | G |
| 11 | G661f44S349             | 16728018 | 0 | 0   | 0      | G |
| 11 | BICF2P35573             | 16752388 | A | 0.5 | 0.6429 | G |
| 11 | TIGRP2P148004_rs9065573 | 16774219 | 0 | 0   | 0      | G |
| 11 | BICF2G630293293         | 16781748 | G | 0   | 0      | A |
| 11 | BICF2P1246998           | 16791824 | G | 0.5 | 0.1429 | A |
| 11 | BICF2P55319             | 16813521 | A | 0   | 0      | G |

|    |                 |          |   |     |        |   |
|----|-----------------|----------|---|-----|--------|---|
| 11 | BICF2P953255    | 16829245 | 0 | 0   | 0      | G |
| 11 | BICF2P919808    | 16847411 | A | 1   | 1      | G |
| 11 | BICF2S23032402  | 16860218 | G | 0   | 0      | A |
| 11 | BICF2P818158    | 16872074 | 0 | 0   | 0      | A |
| 11 | BICF2P989944    | 16887154 | C | 0.5 | 0.8571 | A |
| 11 | BICF2P463587    | 16900858 | G | 0   | 0      | A |
| 11 | BICF2S23660185  | 16912872 | A | 0   | 0      | G |
| 11 | BICF2S23630769  | 16920361 | A | 0   | 0      | G |
| 11 | BICF2S23043047  | 16935031 | G | 0   | 0      | A |
| 11 | BICF2S23431826  | 16959263 | A | 0   | 0      | G |
| 11 | BICF2G630293306 | 16968579 | G | 0   | 0      | A |
| 11 | BICF2P895870    | 16984343 | A | 0   | 0      | G |
| 11 | BICF2S23334793  | 16992660 | A | 0.5 | 0.8571 | G |
| 11 | BICF2S23911017  | 17017467 | G | 0   | 0      | A |
| 11 | BICF2P402337    | 17020222 | 0 | 0   | 0      | A |
| 11 | BICF2S23252938  | 17038703 | C | 0   | 0      | A |
| 11 | BICF2S23119597  | 17054271 | A | 0   | 0      | G |
| 11 | BICF2P1419595   | 17058442 | 0 | 0   | 0      | G |
| 11 | BICF2S22910870  | 17074749 | A | 0   | 0      | G |
| 11 | BICF2P509495    | 17081729 | G | 0   | 0      | A |
| 11 | BICF2P421357    | 17096037 | G | 0   | 0      | A |
| 11 | BICF2P90493     | 17107032 | A | 0   | 0      | G |
| 11 | BICF2P445669    | 17118788 | G | 0   | 0      | A |
| 11 | BICF2G630293309 | 17126826 | 0 | 0   | 0      | C |
| 11 | BICF2G630293330 | 17136139 | A | 0.5 | 0.8571 | G |
| 11 | BICF2G630293338 | 17148215 | A | 0.5 | 0.8571 | G |
| 11 | BICF2G630293354 | 17162525 | A | 0.5 | 0.1429 | C |
| 11 | BICF2G630293366 | 17179950 | A | 0.5 | 0.1429 | C |
| 11 | BICF2G630293370 | 17188897 | A | 0.5 | 0.8571 | G |
| 11 | BICF2G630293381 | 17193700 | C | 0   | 0      | A |
| 11 | BICF2S2306554   | 17199715 | T | 0   | 0      | A |
| 11 | BICF2S24410883  | 17206790 | T | 1   | 1      | A |
| 11 | BICF2G630293407 | 17217768 | T | 0.5 | 0.1429 | A |
| 11 | BICF2S23527290  | 17229150 | G | 0   | 0      | A |
| 11 | BICF2S23234577  | 17250223 | A | 0   | 0      | G |
| 11 | BICF2S24511779  | 17269747 | G | 0   | 0      | A |
| 11 | BICF2P401162    | 17272602 | A | 0   | 0      | G |
| 11 | BICF2P401161    | 17273091 | A | 0.5 | 0.8571 | G |
| 11 | BICF2P1390942   | 17293069 | A | 0.5 | 0.8571 | G |
| 11 | BICF2P1390945   | 17293199 | G | 0.5 | 0.8571 | A |
| 11 | BICF2G630293426 | 17300978 | A | 0   | 0      | C |
| 11 | BICF2S23336786  | 17301569 | A | 0   | 0      | G |
| 11 | BICF2G630293438 | 17308924 | A | 0.5 | 0.1429 | G |
| 11 | BICF2P784489    | 17325124 | A | 0   | 0      | G |
| 11 | BICF2G630293468 | 17334238 | A | 0.5 | 0.8571 | G |
| 11 | BICF2G630293478 | 17344955 | A | 0   | 0      | C |
| 11 | BICF2S23256177  | 17353593 | G | 0.5 | 0.8571 | A |

|    |                         |          |   |     |         |   |
|----|-------------------------|----------|---|-----|---------|---|
| 11 | BICF2P334123            | 17366477 | A | 0   | 0       | T |
| 11 | BICF2P588281            | 17398670 | A | 0.5 | 0.1429  | G |
| 11 | BICF2S23312504          | 17420880 | 0 | 0   | 0       | C |
| 11 | BICF2G630293497         | 17427187 | C | 0   | 0       | A |
| 11 | BICF2G630293525         | 17441707 | A | 1   | 0.7857  | G |
| 11 | BICF2G630293540         | 17456510 | A | 0.5 | 0.1429  | G |
| 11 | BICF2G630293556         | 17475378 | A | 0   | 0.2143  | G |
| 11 | BICF2S23713485          | 17483707 | G | 0.5 | 0.08333 | A |
| 11 | BICF2G630293576         | 17495391 | G | 0.5 | 0.1429  | A |
| 11 | BICF2G630293594         | 17508042 | A | 0   | 0       | G |
| 11 | BICF2G630293604         | 17523652 | A | 0   | 0       | C |
| 11 | BICF2P1070138           | 17536102 | A | 0.5 | 0.6429  | G |
| 11 | BICF2P1070141           | 17538032 | A | 0.5 | 0.6429  | G |
| 11 | BICF2G630293634         | 17556139 | A | 0.5 | 0.6429  | G |
| 11 | BICF2P81696             | 17570982 | 0 | 0   | 0       | G |
| 11 | BICF2P518357            | 17581211 | G | 1   | 1       | A |
| 11 | TIGRP2P148033_rs8884260 | 17619273 | 0 | 0   | 0       | C |
| 11 | BICF2P375840            | 17649550 | 0 | 0   | 0       | G |
| 11 | BICF2P110857            | 17669692 | A | 0.5 | 0.1429  | G |
| 11 | BICF2P730985            | 17678808 | G | 0   | 0       | A |
| 11 | BICF2G630293644         | 17694347 | A | 0   | 0.2143  | G |
| 11 | BICF2P1187113           | 17702881 | A | 0   | 0       | G |
| 11 | BICF2S23416435          | 17713343 | G | 0.5 | 0.7     | A |
| 11 | BICF2S22946719          | 17716730 | A | 0.5 | 0.6429  | G |
| 11 | BICF2S23617070          | 17730295 | A | 0   | 0       | G |
| 11 | BICF2P328115            | 17753652 | 0 | 0   | 0       | A |
| 11 | BICF2G630293675         | 17762076 | A | 0   | 0.2143  | G |
| 11 | BICF2P1138073           | 17772069 | 0 | 0   | 0       | G |
| 11 | BICF2G630293676         | 17789329 | G | 0   | 0       | C |
| 11 | BICF2G630293684         | 17808565 | A | 0.5 | 0.6429  | G |
| 11 | BICF2G630293705         | 17823791 | G | 0   | 0       | A |
| 11 | BICF2G630293708         | 17825506 | A | 0.5 | 0.3     | G |
| 11 | BICF2G630293714         | 17839474 | G | 0.5 | 0.6429  | A |
| 11 | BICF2G630293731         | 17848467 | G | 0   | 0       | A |
| 11 | BICF2G630293753         | 17863756 | G | 0.5 | 0.1429  | A |
| 11 | BICF2G630293768         | 17875726 | G | 0.5 | 0.1429  | A |
| 11 | BICF2G630293780         | 17884525 | C | 0.5 | 0.1429  | A |
| 11 | BICF2G630293799         | 17895762 | C | 0.5 | 0.1429  | A |
| 11 | BICF2G630293818         | 17908969 | A | 0.5 | 0.1429  | G |
| 11 | BICF2G630293849         | 17929862 | G | 0   | 0       | A |
| 11 | BICF2P110934            | 17947152 | 0 | 0   | 0       | A |
| 11 | BICF2G630293850         | 17962661 | A | 0   | 0       | G |
| 11 | BICF2P266130            | 17970006 | G | 0.5 | 0.1429  | A |
| 11 | BICF2G630293857         | 17981647 | A | 0.5 | 0.1429  | G |
| 11 | BICF2S23036178          | 17994846 | C | 0   | 0       | G |
| 11 | BICF2G630293859         | 17999413 | G | 0.5 | 0.5     | A |
| 11 | BICF2G630293875         | 18013440 | G | 0.5 | 0.1429  | A |

|    |                 |          |   |     |        |   |
|----|-----------------|----------|---|-----|--------|---|
| 11 | BICF2S23045649  | 18035367 | 0 | 0   | 0      | G |
| 11 | BICF2P351614    | 18043650 | A | 1   | 1      | G |
| 11 | BICF2P19258     | 18061101 | A | 1   | 1      | G |
| 11 | BICF2G630293889 | 18086068 | G | 0.5 | 0.5    | A |
| 11 | BICF2S23534753  | 18110454 | 0 | 0   | 0      | A |
| 11 | BICF2P843027    | 18117079 | 0 | 0   | 0      | A |
| 11 | BICF2G630293902 | 18148835 | G | 1   | 1      | A |
| 11 | BICF2G630293909 | 18167986 | A | 0.5 | 0.5    | G |
| 11 | BICF2G630293914 | 18185175 | 0 | 0   | 0      | A |
| 11 | BICF2G630293927 | 18202467 | 0 | 0   | 0      | G |
| 11 | BICF2G630293933 | 18213642 | A | 0   | 0      | G |
| 11 | BICF2G630293934 | 18213948 | 0 | 0   | 0      | G |
| 11 | BICF2G630293939 | 18219097 | G | 1   | 1      | A |
| 11 | BICF2G630293965 | 18236239 | A | 1   | 1      | C |
| 11 | BICF2G630293968 | 18240332 | G | 1   | 1      | A |
| 11 | BICF2G630293982 | 18251938 | A | 1   | 1      | G |
| 11 | BICF2G630293990 | 18269911 | 0 | 0   | 0      | A |
| 11 | BICF2P956108    | 18273917 | 0 | 0   | 0      | A |
| 11 | BICF2G630293995 | 18290528 | A | 0   | 0      | G |
| 11 | BICF2G630294031 | 18316724 | C | 1   | 1      | A |
| 11 | BICF2G630294051 | 18339255 | C | 0   | 0      | A |
| 11 | BICF2G630294055 | 18343083 | A | 0   | 0      | G |
| 11 | BICF2P1140371   | 18358355 | A | 1   | 1      | T |
| 11 | BICF2G630294082 | 18381333 | A | 1   | 1      | G |
| 11 | BICF2G630294096 | 18389176 | A | 1   | 1      | G |
| 11 | BICF2G630294130 | 18405775 | G | 0.5 | 0.5    | A |
| 11 | BICF2G630294145 | 18413721 | 0 | 0   | 0      | T |
| 11 | BICF2G630294149 | 18430151 | A | 0.5 | 0.5    | G |
| 11 | BICF2G630294152 | 18435148 | G | 0.5 | 0.5    | A |
| 11 | BICF2G630294163 | 18456618 | A | 0.5 | 0.5    | G |
| 11 | BICF2G630294203 | 18482294 | G | 0.5 | 0.1429 | C |
| 11 | BICF2G630294211 | 18495327 | C | 0.5 | 0.8571 | G |
| 11 | BICF2G630294216 | 18503760 | G | 0.5 | 0.1429 | A |
| 11 | BICF2G630294224 | 18516891 | A | 0.5 | 0.5    | G |
| 11 | BICF2S2453933   | 18537529 | G | 1   | 0.6429 | A |
| 11 | BICF2G630294236 | 18538438 | A | 1   | 1      | G |
| 11 | BICF2G630294243 | 18551716 | A | 0   | 0      | G |
| 11 | BICF2G630294248 | 18555184 | A | 0   | 0      | G |
| 11 | BICF2P1362816   | 18579634 | A | 0   | 0      | G |
| 11 | BICF2G630294284 | 18586488 | G | 0   | 0      | A |
| 11 | BICF2G630294297 | 18600776 | A | 0.5 | 0.8571 | C |
| 11 | BICF2G630294329 | 18620309 | C | 0.5 | 0.1429 | A |
| 11 | BICF2G630294344 | 18634034 | G | 0   | 0      | A |
| 11 | BICF2G630294349 | 18643939 | A | 0.5 | 0.1429 | G |
| 11 | BICF2G630294375 | 18654005 | G | 0   | 0      | A |
| 11 | BICF2P199564    | 18673669 | C | 0   | 0      | A |
| 11 | BICF2G630294406 | 18679940 | A | 0   | 0      | G |

|    |                 |          |   |     |        |   |
|----|-----------------|----------|---|-----|--------|---|
| 11 | BICF2G630294409 | 18689494 | G | 0.5 | 0.1429 | A |
| 11 | BICF2G630294430 | 18703872 | A | 0.5 | 0.1429 | C |
| 11 | BICF2G630294452 | 18721003 | A | 0   | 0      | G |
| 11 | BICF2G630294459 | 18727147 | A | 1   | 0.6429 | C |
| 11 | BICF2S22917717  | 18740733 | G | 0   | 0.3571 | A |
| 11 | BICF2S22927034  | 18752132 | A | 0   | 0      | T |
| 11 | BICF2P24975     | 18752560 | A | 0   | 0      | G |
| 11 | BICF2S23726677  | 18758035 | 0 | 0   | 0      | G |
| 11 | BICF2G630294517 | 18771556 | G | 0.5 | 0.1429 | A |
| 11 | BICF2P709432    | 18786354 | G | 0.5 | 0.5    | A |
| 11 | BICF2S23436979  | 18788347 | G | 0.5 | 0.5    | A |
| 11 | BICF2S23436978  | 18788529 | A | 0.5 | 0.5    | C |
| 11 | BICF2P560627    | 18794064 | 0 | 0   | 0      | A |
| 11 | BICF2G630294542 | 18803152 | G | 1   | 1      | A |
| 11 | BICF2G630294559 | 18824284 | A | 0.5 | 0.1429 | C |
| 11 | BICF2G630294567 | 18833712 | A | 0   | 0      | G |
| 11 | BICF2G630294577 | 18843807 | A | 0   | 0      | G |
| 11 | BICF2G630294603 | 18862390 | A | 0   | 0      | G |
| 11 | BICF2G630294618 | 18873551 | G | 0   | 0      | A |
| 11 | BICF2G630294632 | 18887070 | A | 0   | 0      | G |
| 11 | BICF2G630294651 | 18903531 | G | 0.5 | 0.2143 | A |
| 11 | BICF2G630294653 | 18913755 | A | 0   | 0      | T |
| 11 | BICF2G630294659 | 18930831 | A | 0.5 | 0.2143 | G |
| 11 | BICF2G630294675 | 18945047 | G | 0   | 0      | A |
| 11 | BICF2G630294686 | 18953123 | G | 0.5 | 0.2143 | A |
| 11 | BICF2G630294724 | 18965806 | G | 0   | 0      | A |
| 11 | BICF2P428495    | 18988414 | A | 0.5 | 0.1429 | C |
| 11 | BICF2G630294741 | 18999416 | G | 0.5 | 0.8571 | A |
| 11 | BICF2G630294746 | 19010423 | A | 0.5 | 0.4286 | G |
| 11 | BICF2G630294750 | 19025463 | A | 0.5 | 0.4286 | C |
| 11 | BICF2G630294756 | 19034571 | A | 0.5 | 0.4286 | C |
| 11 | BICF2G630294770 | 19055170 | A | 0.5 | 0.4286 | C |
| 11 | BICF2G630294787 | 19071837 | T | 1   | 0.7143 | A |
| 11 | BICF2P270204    | 19080791 | A | 0.5 | 0.5714 | T |
| 11 | BICF2G630294814 | 19091032 | A | 0.5 | 0.4286 | G |
| 11 | BICF2S236113    | 19101800 | G | 0.5 | 0.1429 | A |
| 11 | BICF2G630294836 | 19114139 | A | 0   | 0.2857 | G |
| 11 | BICF2G630294854 | 19132047 | T | 0   | 0      | A |
| 11 | BICF2G630294857 | 19137967 | G | 0.5 | 0.4286 | A |
| 11 | BICF2G630294874 | 19147686 | G | 0   | 0      | A |
| 11 | BICF2S23423737  | 19161486 | A | 0.5 | 0.4286 | G |
| 11 | BICF2P735901    | 19173685 | A | 0   | 0      | C |
| 11 | BICF2P1057901   | 19177849 | A | 0   | 0      | G |
| 11 | BICF2P151331    | 19191743 | G | 0.5 | 0.4286 | A |
| 11 | BICF2P151332    | 19191965 | A | 0.5 | 0.4286 | G |
| 11 | BICF2G630294922 | 19212509 | A | 0   | 0      | G |
| 11 | BICF2G630294928 | 19219236 | A | 0.5 | 0.5    | G |

|    |                 |          |   |     |        |   |
|----|-----------------|----------|---|-----|--------|---|
| 11 | BICF2P1025070   | 19236367 | A | 1   | 0.6429 | C |
| 11 | BICF2P371803    | 19244268 | G | 0   | 0      | A |
| 11 | BICF2P649308    | 19257565 | A | 0   | 0      | G |
| 11 | BICF2G630294943 | 19272876 | A | 0.5 | 0.5    | G |
| 11 | BICF2G630294952 | 19275110 | G | 0.5 | 0.5    | A |
| 11 | BICF2G630294965 | 19290128 | A | 0.5 | 0.5    | C |
| 11 | BICF2G630294984 | 19303580 | A | 0   | 0.2857 | C |
| 11 | BICF2P1283469   | 19309826 | A | 0   | 0      | G |
| 11 | BICF2P996832    | 19330631 | G | 0   | 0      | A |
| 11 | BICF2P996836    | 19331696 | A | 0.5 | 0.5    | G |
| 11 | BICF2P773359    | 19354018 | A | 0   | 0      | G |
| 11 | BICF2P966539    | 19371628 | A | 0   | 0      | G |
| 11 | BICF2G630295011 | 19377552 | A | 0.5 | 0.5    | C |
| 11 | BICF2S23120899  | 19391467 | G | 0.5 | 0.2143 | A |
| 11 | BICF2G630295034 | 19423728 | A | 0.5 | 0.1429 | T |
| 11 | BICF2G630295039 | 19428887 | C | 0   | 0.3571 | G |
| 11 | BICF2P365017    | 19435848 | A | 0.5 | 0.5    | C |
| 11 | BICF2G630295055 | 19435915 | A | 0.5 | 0.1429 | C |
| 11 | BICF2G630295070 | 19453591 | A | 0.5 | 0.1429 | G |
| 11 | BICF2S23639422  | 19478632 | A | 0   | 0      | G |
| 11 | BICF2P395372    | 19488082 | G | 0.5 | 0.2143 | A |
| 11 | BICF2G630295111 | 19494299 | A | 0   | 0.6429 | G |
| 11 | BICF2G630295122 | 19504479 | A | 0.5 | 0.1429 | C |
| 11 | BICF2G630295131 | 19513517 | A | 0   | 0.2857 | C |
| 11 | BICF2G630295137 | 19517500 | G | 0   | 0      | A |
| 11 | BICF2G630295152 | 19527377 | A | 0   | 0      | G |
| 11 | BICF2G630295168 | 19543196 | G | 0   | 0      | A |
| 11 | BICF2S2344073   | 19551846 | G | 0.5 | 0.25   | C |
| 11 | BICF2G630295198 | 19565561 | A | 0.5 | 0.3571 | G |
| 11 | BICF2G630295220 | 19575460 | A | 0.5 | 0.2143 | G |
| 11 | BICF2G630295233 | 19590464 | A | 0   | 0      | G |
| 11 | BICF2G630295236 | 19595751 | G | 0   | 0.6429 | A |
| 11 | BICF2G630295242 | 19606558 | A | 0   | 0      | G |
| 11 | BICF2G630295247 | 19610187 | A | 1   | 0.3571 | C |
| 11 | BICF2G630295267 | 19621547 | G | 0.5 | 0.7857 | A |
| 11 | BICF2S23523600  | 19663755 | A | 0   | 0      | C |
| 11 | BICF2S23338718  | 19667872 | G | 0   | 0.3571 | A |
| 11 | BICF2G630295272 | 19680649 | 0 | 0   | 0      | G |
| 11 | BICF2P539905    | 19695834 | A | 0   | 0.6429 | G |
| 11 | BICF2P1310910   | 19699968 | A | 0   | 0.6429 | G |
| 11 | BICF2P327835    | 19711469 | G | 0   | 0.3571 | A |
| 11 | BICF2G630295282 | 19732403 | G | 0.5 | 0.8571 | A |
| 11 | BICF2G630295301 | 19763127 | C | 0   | 0.6429 | G |
| 11 | BICF2G630295303 | 19768918 | A | 0.5 | 0.1429 | C |
| 11 | BICF2G630295322 | 19791585 | A | 1   | 0.3571 | G |
| 11 | BICF2G630295335 | 19805514 | 0 | 0   | 0      | A |
| 11 | BICF2G630295339 | 19830104 | A | 0   | 0.3571 | G |

|    |                         |          |   |     |        |   |
|----|-------------------------|----------|---|-----|--------|---|
| 11 | BICF2P316322            | 19857005 | A | 1   | 0.7143 | G |
| 11 | BICF2G630295378         | 19861239 | T | 0   | 0      | A |
| 11 | BICF2P1115743           | 19871765 | G | 1   | 0.3571 | A |
| 11 | BICF2G630295396         | 19874541 | A | 0   | 0      | G |
| 11 | BICF2P931039            | 19880988 | A | 0   | 0.6429 | C |
| 11 | BICF2G630295406         | 19882857 | A | 0   | 0      | G |
| 11 | BICF2G630295410         | 19885164 | C | 1   | 0.3571 | A |
| 11 | BICF2G630295432         | 19897678 | G | 1   | 0.3571 | C |
| 11 | BICF2P544957            | 19913744 | A | 0   | 0.2857 | G |
| 11 | BICF2G630295453         | 19919173 | A | 0.5 | 0.5714 | G |
| 11 | BICF2G630295482         | 19932009 | A | 1   | 0.7143 | G |
| 11 | BICF2G630295494         | 19941563 | A | 0.5 | 0.1429 | G |
| 11 | BICF2P928741            | 19969802 | G | 0.5 | 0.5    | A |
| 11 | BICF2P1162901           | 19971880 | G | 1   | 0.7143 | A |
| 11 | BICF2G630295523         | 19980914 | G | 1   | 0.6429 | A |
| 11 | BICF2G630295527         | 19992941 | G | 0   | 0      | A |
| 11 | BICF2G630295546         | 20000789 | G | 0   | 0      | A |
| 11 | BICF2P1248023           | 20014381 | A | 0   | 0      | G |
| 11 | BICF2G630295561         | 20038791 | C | 0.5 | 0.1429 | A |
| 11 | BICF2G630295566         | 20047237 | A | 0.5 | 0.5    | C |
| 11 | BICF2S23033111          | 20056580 | C | 0.5 | 0.1429 | A |
| 11 | BICF2G630295582         | 20068179 | G | 0.5 | 0.1429 | A |
| 11 | BICF2G630295597         | 20089514 | G | 0   | 0.3571 | A |
| 11 | BICF2G630295607         | 20104244 | A | 1   | 0.7143 | G |
| 11 | BICF2G630295619         | 20115707 | A | 1   | 0.75   | G |
| 11 | BICF2G630295621         | 20132853 | A | 0.5 | 0.1429 | C |
| 11 | BICF2G630295626         | 20138489 | G | 0.5 | 0.1429 | A |
| 11 | BICF2G630295657         | 20158990 | G | 0   | 0      | A |
| 11 | BICF2G630295663         | 20164785 | G | 0   | 0      | A |
| 11 | BICF2G630295685         | 20174069 | A | 0   | 0      | G |
| 11 | BICF2G630295703         | 20197034 | A | 0   | 0      | C |
| 11 | BICF2P913824            | 20210746 | G | 0.5 | 0.4286 | A |
| 11 | BICF2G630295718         | 20226024 | A | 0   | 0      | C |
| 11 | BICF2G630295725         | 20235606 | G | 0   | 0      | A |
| 11 | BICF2P926015            | 20237216 | 0 | 0   | 0      | A |
| 11 | BICF2S23220673          | 20241197 | A | 0.5 | 0.2143 | C |
| 11 | BICF2G630295747         | 20262748 | G | 0.5 | 0.7857 | C |
| 11 | BICF2P937396            | 20276093 | A | 0.5 | 0.2143 | G |
| 11 | BICF2G630295769         | 20288891 | A | 0   | 0.2857 | G |
| 11 | BICF2P673357            | 20292116 | 0 | 0   | 0      | G |
| 11 | BICF2G630295787         | 20298013 | A | 0.5 | 0.5    | G |
| 11 | BICF2P315052            | 20312127 | G | 1   | 1      | A |
| 11 | BICF2G630295824         | 20323443 | A | 0.5 | 0.5714 | G |
| 11 | TIGRP2P148087_rs8611965 | 20333613 | 0 | 0   | 0      | G |
| 11 | BICF2P1451901           | 20345147 | 0 | 0   | 0      | G |
| 11 | BICF2G630295849         | 20345294 | G | 0.5 | 0.1429 | A |
| 11 | BICF2G630295857         | 20354945 | A | 0.5 | 0.1429 | T |

|    |                 |          |   |     |         |   |
|----|-----------------|----------|---|-----|---------|---|
| 11 | BICF2G630295864 | 20360350 | G | 0.5 | 0.1429  | A |
| 11 | BICF2G630295866 | 20361043 | G | 0.5 | 0.2143  | A |
| 11 | BICF2G630295868 | 20371379 | A | 0.5 | 0.1667  | G |
| 11 | BICF2G630295873 | 20387161 | G | 0.5 | 0.2143  | A |
| 11 | BICF2G630295882 | 20394351 | A | 0.5 | 0.2143  | G |
| 11 | BICF2P293356    | 20411470 | A | 1   | 0.3571  | C |
| 11 | BICF2S23423639  | 20426647 | A | 0.5 | 0.2143  | G |
| 11 | BICF2G630295918 | 20436742 | A | 0.5 | 0.1429  | G |
| 11 | BICF2G630295925 | 20451977 | G | 0.5 | 0.2143  | A |
| 11 | BICF2G630295930 | 20464259 | G | 0.5 | 0.1429  | A |
| 11 | BICF2G630295932 | 20472644 | G | 0.5 | 0.1429  | A |
| 11 | BICF2P185213    | 20488368 | G | 0   | 0.6429  | A |
| 11 | BICF2G630295961 | 20488525 | G | 0.5 | 0.1429  | A |
| 11 | BICF2G630295972 | 20497962 | C | 0.5 | 0.1429  | G |
| 11 | BICF2P776428    | 20505580 | A | 0.5 | 0.2143  | G |
| 11 | BICF2S23235200  | 20516034 | A | 0.5 | 0.2143  | G |
| 11 | BICF2G630296021 | 20533360 | G | 0.5 | 0.1429  | A |
| 11 | BICF2G630296037 | 20539934 | A | 0.5 | 0.08333 | G |
| 11 | BICF2G630296043 | 20554714 | A | 0.5 | 0.2143  | G |
| 11 | BICF2P192213    | 20573071 | G | 0.5 | 0.5     | A |
| 11 | BICF2P209873    | 20577123 | A | 0.5 | 0.2143  | G |
| 11 | BICF2P528224    | 20586616 | C | 0.5 | 0.1667  | A |
| 11 | BICF2S2368242   | 20601796 | A | 1   | 0.7143  | G |
| 11 | BICF2S23548912  | 20629209 | G | 0.5 | 0.08333 | A |
| 11 | BICF2S23141428  | 20631719 | A | 0.5 | 0.1429  | G |
| 11 | BICF2P1349400   | 20643054 | C | 0.5 | 0.08333 | A |
| 11 | BICF2S2303223   | 20661188 | A | 0.5 | 0.1429  | G |
| 11 | BICF2P330067    | 20666455 | A | 0   | 0       | C |
| 11 | BICF2P508985    | 20679551 | G | 0.5 | 0.1429  | A |
| 11 | BICF2P71271     | 20692673 | A | 0.5 | 0.5     | G |
| 11 | BICF2P871369    | 20700625 | G | 0.5 | 0.5     | A |
| 11 | BICF2S23730380  | 20715584 | C | 0   | 0.6429  | G |
| 11 | BICF2P1342439   | 20740244 | A | 0   | 0.2857  | C |
| 11 | BICF2P686280    | 20748799 | A | 0.5 | 0.1429  | G |
| 11 | BICF2P124153    | 20763075 | G | 0   | 0.3571  | A |
| 11 | BICF2P701       | 20770006 | C | 0.5 | 0.4286  | A |
| 11 | BICF2S24415651  | 20796364 | G | 0   | 0.2857  | A |
| 11 | BICF2P620196    | 20806549 | C | 0.5 | 0.5714  | A |
| 11 | BICF2S23018347  | 20816393 | A | 0.5 | 0.4286  | G |
| 11 | BICF2S23054915  | 20830359 | G | 0.5 | 0.5714  | A |
| 11 | BICF2P640630    | 20840849 | 0 | 0   | 0       | G |
| 11 | BICF2P979350    | 20850097 | 0 | 0   | 0       | A |
| 11 | BICF2S23329555  | 20871523 | A | 0.5 | 0.1429  | C |
| 11 | BICF2P55387     | 20876796 | A | 0   | 0       | G |
| 11 | BICF2P461569    | 20884876 | A | 0.5 | 0.1429  | G |
| 11 | BICF2P718382    | 20887666 | G | 0.5 | 0.1429  | A |
| 11 | BICF2S23410102  | 20905473 | A | 0   | 0       | G |



|    |                         |          |   |     |        |   |
|----|-------------------------|----------|---|-----|--------|---|
| 11 | BICF2S23410100          | 20905591 | G | 0   | 0      | A |
| 11 | BICF2S22926672          | 20916974 | A | 0   | 0      | G |
| 11 | BICF2S22926024          | 20920934 | C | 0.5 | 0.1429 | A |
| 11 | BICF2P321292            | 20931783 | G | 0.5 | 0.1429 | A |
| 11 | BICF2P286516            | 20943171 | A | 0.5 | 0.1429 | G |
| 11 | BICF2P878837            | 20962099 | G | 0.5 | 0.7857 | A |
| 11 | BICF2P296900            | 20974727 | G | 0.5 | 0.1429 | A |
| 11 | BICF2P691930            | 21002974 | G | 0.5 | 0.5    | A |
| 11 | BICF2P888442            | 21013506 | A | 0.5 | 0.5    | G |
| 11 | BICF2S237332            | 21037442 | A | 0.5 | 0.5    | G |
| 11 | BICF2P1320088           | 21046559 | A | 0.5 | 0.5    | G |
| 11 | BICF2S23036108          | 21057588 | G | 0   | 0.2857 | A |
| 11 | BICF2P813776            | 21068122 | G | 0   | 0      | A |
| 11 | BICF2P146129            | 21090648 | G | 0.5 | 0.2143 | C |
| 11 | BICF2P588166            | 21106176 | A | 0.5 | 0.5    | G |
| 11 | BICF2S23436060          | 21115548 | A | 0.5 | 0.5    | C |
| 11 | BICF2P1184037           | 21145171 | A | 0.5 | 0.5    | G |
| 11 | BICF2P155321            | 21164474 | 0 | 0   | 0      | G |
| 11 | BICF2S2369315           | 21172501 | G | 0.5 | 0.5    | A |
| 11 | BICF2S2314915           | 21187619 | A | 0.5 | 0.5    | G |
| 11 | BICF2S22957845          | 21204022 | G | 0.5 | 0.5    | A |
| 11 | BICF2P780026            | 21217980 | 0 | 0   | 0      | T |
| 11 | BICF2S2449908           | 21229344 | A | 0.5 | 0.5    | C |
| 11 | BICF2P1045595           | 21231365 | A | 0.5 | 0.7857 | G |
| 11 | BICF2P218661            | 21242536 | G | 0   | 0.2857 | A |
| 11 | BICF2P893687            | 21262623 | C | 0.5 | 0.5    | A |
| 11 | BICF2P1018750           | 21273655 | A | 0   | 0.2857 | G |
| 11 | BICF2P256262            | 21275205 | A | 0.5 | 0.2143 | G |
| 11 | BICF2P551986            | 21289090 | G | 0.5 | 0.2143 | A |
| 11 | BICF2P1088502           | 21293746 | A | 0.5 | 0.7857 | G |
| 11 | BICF2G630296074         | 21305424 | G | 0.5 | 0.7857 | A |
| 11 | BICF2G630296084         | 21311139 | C | 0.5 | 0.7857 | G |
| 11 | BICF2G630296097         | 21323724 | G | 0   | 0      | A |
| 11 | BICF2S23643044          | 21334121 | A | 0   | 0      | G |
| 11 | BICF2G630296151         | 21349033 | A | 1   | 0.7143 | G |
| 11 | BICF2S23424668          | 21362051 | A | 0   | 0      | T |
| 11 | BICF2G630296161         | 21378912 | G | 0   | 0      | A |
| 11 | BICF2G630296171         | 21390635 | A | 0   | 0      | G |
| 11 | BICF2P976361            | 21414114 | 0 | 0   | 0      | G |
| 11 | BICF2G630296192         | 21427157 | G | 0   | 0      | A |
| 11 | BICF2P1170256           | 21446033 | A | 0   | 0      | G |
| 11 | BICF2S22934385          | 21457814 | C | 0   | 0      | A |
| 11 | BICF2P36004             | 21461927 | A | 0   | 0      | C |
| 11 | TIGRP2P148105_rs8937602 | 21476758 | 0 | 0   | 0      | A |
| 11 | BICF2P247877            | 21488182 | G | 0   | 0      | A |
| 11 | BICF2P1291028           | 21504981 | 0 | 0   | 0      | A |
| 11 | BICF2P889224            | 21513372 | A | 0.5 | 0.2143 | G |

|    |                         |          |   |     |        |   |
|----|-------------------------|----------|---|-----|--------|---|
| 11 | BICF2P788111            | 21524299 | 0 | 0   | 0      | G |
| 11 | BICF2P163083            | 21544158 | G | 0.5 | 0.5    | A |
| 11 | BICF2P787554            | 21556020 | A | 0.5 | 0.5    | G |
| 11 | BICF2P1066394           | 21562728 | A | 0.5 | 0.5    | G |
| 11 | BICF2P735269            | 21583354 | G | 0   | 0      | A |
| 11 | BICF2S23418452          | 21596161 | A | 0   | 0      | G |
| 11 | BICF2P962745            | 21606854 | A | 0.5 | 0.5    | G |
| 11 | BICF2P298471            | 21612389 | G | 1   | 1      | A |
| 11 | BICF2P1255374           | 21622125 | C | 0   | 0      | A |
| 11 | BICF2P1423859           | 21650406 | A | 0   | 0      | G |
| 11 | BICF2S23553865          | 21667664 | A | 0   | 0      | C |
| 11 | BICF2P912457            | 21677563 | A | 1   | 1      | G |
| 11 | BICF2P1037814           | 21690213 | C | 0.5 | 0.5    | A |
| 11 | BICF2S23519359          | 21707109 | A | 0   | 0      | G |
| 11 | BICF2P1047236           | 21721244 | A | 0   | 0      | G |
| 11 | BICF2S23158677          | 21728173 | 0 | 0   | 0      | G |
| 11 | BICF2P137284            | 21737513 | 0 | 0   | 0      | A |
| 11 | BICF2P1289              | 21748807 | A | 0   | 0      | G |
| 11 | BICF2P467771            | 21758196 | A | 0.5 | 0.8571 | G |
| 11 | BICF2P131909            | 21775911 | A | 0   | 0      | G |
| 11 | BICF2P1049611           | 21781376 | G | 0   | 0      | A |
| 11 | BICF2S23151308          | 21796136 | A | 0   | 0.2857 | G |
| 11 | BICF2P981606            | 21818957 | A | 0   | 0.2857 | C |
| 11 | BICF2P682281            | 21828687 | A | 0.5 | 0.4286 | G |
| 11 | BICF2P683713            | 21843115 | A | 0   | 0      | G |
| 11 | BICF2P377574            | 21857531 | G | 1   | 0.7143 | A |
| 11 | BICF2P1222161           | 21867246 | G | 0   | 0.2857 | A |
| 11 | BICF2P820002            | 21875250 | A | 0   | 0.2857 | G |
| 11 | BICF2P71513             | 21879707 | G | 1   | 0.7143 | A |
| 11 | BICF2P178507            | 21902450 | A | 0   | 0      | G |
| 11 | BICF2P389783            | 21914982 | A | 0   | 0.2857 | C |
| 11 | BICF2P1232948           | 21929517 | G | 0   | 0.2857 | A |
| 11 | BICF2S23321729          | 21945763 | A | 0   | 0      | G |
| 11 | BICF2P1171430           | 21954146 | A | 0   | 0.2857 | G |
| 11 | BICF2P112299            | 21969781 | A | 0   | 0      | G |
| 11 | BICF2P960409            | 21976857 | A | 0   | 0      | G |
| 11 | BICF2P1128958           | 21997285 | A | 0   | 0      | G |
| 11 | BICF2P125473            | 22007281 | 0 | 0   | 0      | A |
| 11 | BICF2P682791            | 22014370 | A | 0   | 0.2857 | G |
| 11 | TIGRP2P148111_rs9155029 | 22033882 | 0 | 0   | 0      | G |
| 11 | BICF2P257354            | 22048998 | 0 | 0   | 0      | A |
| 11 | BICF2P1439645           | 22067669 | 0 | 0   | 0      | A |
| 11 | BICF2P932618            | 22074092 | 0 | 0   | 0      | A |
| 11 | BICF2P462498            | 22101053 | A | 0   | 0.3333 | G |
| 11 | BICF2P235304            | 22103422 | G | 0   | 0.3571 | A |
| 11 | BICF2P651853            | 22127861 | A | 0   | 0      | G |
| 11 | BICF2S23642197          | 22143363 | A | 0   | 0      | G |

|    |                         |          |   |     |         |   |
|----|-------------------------|----------|---|-----|---------|---|
| 11 | BICF2S23057081          | 22155476 | G | 0   | 0       | A |
| 11 | BICF2P405315            | 22166214 | 0 | 0   | 0       | G |
| 11 | BICF2P353359            | 22184358 | C | 0   | 0       | G |
| 11 | BICF2S23237996          | 22202112 | A | 0   | 0.3571  | G |
| 11 | BICF2P84561             | 22215994 | C | 0.5 | 0.1429  | A |
| 11 | BICF2P84578             | 22220226 | G | 0.5 | 0.5     | A |
| 11 | BICF2P1324705           | 22235388 | A | 0.5 | 0.08333 | C |
| 11 | BICF2P1409031           | 22251020 | G | 0.5 | 0.1429  | A |
| 11 | BICF2P1376392           | 22257970 | A | 0.5 | 0.1429  | C |
| 11 | BICF2P1068480           | 22266055 | A | 0.5 | 0.1429  | G |
| 11 | BICF2P1456492           | 22278174 | G | 0.5 | 0.5     | A |
| 11 | BICF2P375721            | 22288701 | G | 0.5 | 0.5     | A |
| 11 | BICF2P980779            | 22299358 | G | 0   | 0       | A |
| 11 | BICF2P1441250           | 22317022 | G | 0   | 0       | A |
| 11 | BICF2S2357368           | 22331950 | A | 0   | 0       | G |
| 11 | TIGRP2P148118_rs8832368 | 22355444 | A | 0   | 0       | C |
| 11 | BICF2P1180025           | 22381904 | A | 0   | 0       | G |
| 11 | BICF2P1179939           | 22391348 | 0 | 0   | 0       | A |
| 11 | BICF2P613909            | 22405643 | G | 0   | 0       | A |
| 11 | BICF2S24320279          | 22424240 | G | 1   | 0.7143  | A |
| 11 | BICF2P1183899           | 22443228 | 0 | 0   | 0       | A |
| 11 | TIGRP2P148145_rs9250226 | 22472195 | A | 0   | 0.2857  | G |
| 11 | BICF2P772375            | 22507136 | A | 1   | 0.7143  | G |
| 11 | BICF2P1104748           | 22519160 | A | 0   | 0       | C |
| 11 | BICF2P1268241           | 22542119 | A | 1   | 0.7143  | G |
| 11 | BICF2P1263191           | 22560590 | C | 0   | 0       | A |
| 11 | BICF2P637875            | 22564459 | G | 0   | 0       | A |
| 11 | BICF2S22950239          | 22577681 | C | 0   | 0       | A |
| 11 | TIGRP2P148182_rs9049494 | 22604189 | A | 1   | 0.7143  | G |
| 11 | BICF2P753231            | 22618504 | A | 0   | 0       | G |
| 11 | BICF2P1317858           | 22622253 | G | 0   | 0       | A |
| 11 | BICF2P83580             | 22633444 | G | 0   | 0       | A |
| 11 | BICF2P1132579           | 22643683 | G | 1   | 0.7143  | C |
| 11 | BICF2P620184            | 22672249 | A | 0   | 0       | C |
| 11 | BICF2P896811            | 22697291 | C | 0   | 0       | G |
| 11 | BICF2P286061            | 22715952 | G | 1   | 0.7143  | A |
| 11 | BICF2P619871            | 22726133 | G | 0   | 0       | A |
| 11 | BICF2P162373            | 22745515 | A | 0   | 0       | G |
| 11 | BICF2P66074             | 22751071 | A | 1   | 0.7143  | G |
| 11 | BICF2P1301563           | 22771903 | G | 1   | 0.7143  | A |
| 11 | BICF2P1139513           | 22785692 | G | 1   | 0.7143  | A |
| 11 | BICF2P1214132           | 22795378 | G | 1   | 0.7143  | C |
| 11 | BICF2P935660            | 22808919 | 0 | 0   | 0       | G |
| 11 | BICF2P632351            | 22818510 | A | 0   | 0.25    | G |
| 11 | BICF2P160571            | 22851866 | G | 1   | 0.7143  | A |
| 11 | BICF2P531315            | 22865853 | A | 0   | 0       | C |
| 11 | BICF2P903604            | 22905143 | G | 1   | 0.7143  | A |

|    |                         |          |   |     |        |   |
|----|-------------------------|----------|---|-----|--------|---|
| 11 | BICF2P701019            | 22916411 | T | 1   | 0.7143 | A |
| 11 | BICF2P834413            | 22925544 | A | 0   | 0.2857 | G |
| 11 | TIGRP2P148238_rs8934988 | 22941347 | C | 1   | 0.7143 | A |
| 11 | BICF2P801078            | 22943743 | G | 1   | 0.7143 | A |
| 11 | BICF2P1071742           | 22955945 | G | 0   | 0      | A |
| 11 | TIGRP2P148250_rs8703911 | 22967784 | A | 1   | 0.7143 | G |
| 11 | BICF2P799121            | 22982788 | C | 0.5 | 0.4286 | A |
| 11 | BICF2S22935039          | 22999604 | A | 0.5 | 0.5    | G |
| 11 | BICF2P868123            | 23004789 | 0 | 0   | 0      | G |
| 11 | BICF2S23059899          | 23020722 | A | 0.5 | 0.5    | G |
| 11 | BICF2P767539            | 23053879 | G | 0.5 | 0.5    | A |
| 11 | BICF2P776057            | 23070251 | 0 | 0   | 0      | A |
| 11 | TIGRP2P148266_rs9195575 | 23117401 | A | 0.5 | 0.5    | C |
| 11 | BICF2P722746            | 23138532 | A | 0   | 0      | G |
| 11 | BICF2P513165            | 23149614 | 0 | 0   | 0      | G |
| 11 | BICF2P591209            | 23167247 | G | 0.5 | 0.5    | A |
| 11 | BICF2P147167            | 23193051 | A | 0.5 | 0.5    | G |
| 11 | BICF2P362081            | 23198720 | G | 0   | 0      | A |
| 11 | BICF2S22960816          | 23215357 | G | 0.5 | 0.5    | A |
| 11 | BICF2P128937            | 23234061 | G | 0.5 | 0.5    | A |
| 11 | BICF2G630296198         | 23259837 | 0 | 0   | 0      | C |
| 11 | TIGRP2P148296_rs8746180 | 23272064 | A | 0   | 0      | G |
| 11 | TIGRP2P148308_rs9222896 | 23285367 | G | 0.5 | 0.5    | A |
| 11 | TIGRP2P148309_rs8723273 | 23287673 | A | 0.5 | 0.5    | G |
| 11 | BICF2P697774            | 23300144 | G | 0   | 0      | A |
| 11 | BICF2P245757            | 23333404 | A | 0   | 0      | T |
| 11 | BICF2P294204            | 23342212 | G | 0   | 0      | A |
| 11 | BICF2P635200            | 23354347 | G | 1   | 1      | A |
| 11 | BICF2P405530            | 23361620 | G | 1   | 1      | A |
| 11 | BICF2P1256504           | 23373578 | G | 1   | 1      | A |
| 11 | BICF2P231200            | 23392842 | 0 | 0   | 0      | C |
| 11 | TIGRP2P148343_rs8874372 | 23411913 | G | 1   | 1      | A |
| 11 | BICF2P679809            | 23414531 | A | 1   | 1      | G |
| 11 | BICF2P186232            | 23441780 | 0 | 0   | 0      | A |
| 11 | BICF2P1246544           | 23451746 | 0 | 0   | 0      | G |
| 11 | TIGRP2P148357_rs8941434 | 23480401 | G | 1   | 1      | A |
| 11 | BICF2P936273            | 23484330 | G | 1   | 1      | A |
| 11 | BICF2P808834            | 23501911 | A | 1   | 1      | C |
| 11 | BICF2P1018187           | 23510424 | A | 1   | 1      | G |
| 11 | BICF2G630296200         | 23524137 | 0 | 0   | 0      | A |
| 11 | BICF2P1095814           | 23539463 | G | 1   | 1      | A |
| 11 | BICF2P1095813           | 23540643 | G | 0.5 | 0.5    | A |
| 11 | BICF2P914727            | 23551115 | A | 1   | 1      | C |
| 11 | BICF2P1143791           | 23556438 | A | 0   | 0      | G |
| 11 | BICF2P495885            | 23574951 | A | 0   | 0      | G |
| 11 | BICF2P504097            | 23577921 | C | 0.5 | 0.5    | G |
| 11 | BICF2S23140790          | 23584745 | C | 0.5 | 0.5    | A |

|    |                         |          |   |     |        |   |
|----|-------------------------|----------|---|-----|--------|---|
| 11 | TIGRP2P148394_rs8946632 | 23590605 | 0 | 0   | 0      | G |
| 11 | BICF2S23232745          | 23620291 | G | 0.5 | 0.8571 | A |
| 11 | TIGRP2P148398_rs9234794 | 23623075 | 0 | 0   | 0      | A |
| 11 | TIGRP2P148404_rs9019982 | 23665422 | C | 0   | 0.3571 | A |
| 11 | BICF2P716331            | 23670422 | A | 0   | 0.3333 | C |
| 11 | TIGRP2P148409_rs9112137 | 23679953 | G | 0   | 0      | A |
| 11 | BICF2P545015            | 23701171 | G | 0.5 | 0.4286 | A |
| 11 | BICF2P545013            | 23702328 | A | 0   | 0.2857 | C |
| 11 | BICF2P851474            | 23723216 | A | 0.5 | 0.4286 | G |
| 11 | BICF2P31451             | 23726980 | A | 0   | 0      | G |
| 11 | BICF2S23545592          | 23740673 | A | 0.5 | 0.4167 | C |
| 11 | BICF2S2419777           | 23754712 | C | 0   | 0      | G |
| 11 | TIGRP2P148433_rs9223548 | 23768094 | 0 | 0   | 0      | G |
| 11 | TIGRP2P148435_rs8575135 | 23777146 | A | 0.5 | 0.5    | C |
| 11 | TIGRP2P148436_rs9107108 | 23784437 | G | 0.5 | 0.5    | A |
| 11 | BICF2P456741            | 23811264 | G | 0   | 0.3571 | A |
| 11 | BICF2S23051925          | 23823002 | G | 0   | 0      | A |
| 11 | TIGRP2P148451_rs9213240 | 23829466 | A | 0.5 | 0.4286 | G |
| 11 | BICF2S23249318          | 23859108 | G | 0   | 0.3571 | A |
| 11 | BICF2P132548            | 23872841 | A | 0   | 0.3571 | C |
| 11 | BICF2P609850            | 23874973 | G | 0   | 0      | A |
| 11 | BICF2P903006            | 23892861 | C | 0   | 0.3571 | A |
| 11 | TIGRP2P148464_rs8802465 | 23917490 | G | 0   | 0.3571 | A |
| 11 | BICF2P69513             | 23920402 | A | 0   | 0      | G |
| 11 | BICF2P1226088           | 23971071 | A | 0   | 0      | G |
| 11 | BICF2P850476            | 23978180 | A | 0   | 0      | G |
| 11 | BICF2P393436            | 23998672 | G | 0.5 | 0.5    | A |
| 11 | TIGRP2P148485_rs8825379 | 24010686 | A | 0.5 | 0.5    | G |
| 11 | BICF2S23045162          | 24027591 | G | 0.5 | 0.5    | A |
| 11 | BICF2P846551            | 24075603 | G | 0   | 0.6667 | A |
| 11 | BICF2S22941556          | 24081567 | G | 0   | 0.6429 | A |
| 11 | BICF2P596320            | 24090787 | G | 0.5 | 0.4286 | A |
| 11 | BICF2P1395717           | 24105860 | A | 0.5 | 0.4286 | G |
| 11 | BICF2P97854             | 24118410 | 0 | 0   | 0      | C |
| 11 | BICF2P134729            | 24129832 | 0 | 0   | 0      | G |
| 11 | BICF2P1064149           | 24158720 | A | 0   | 0      | C |
| 11 | BICF2P245558            | 24173685 | G | 0   | 0      | A |
| 11 | BICF2G630296230         | 24184830 | A | 0   | 0      | G |
| 11 | BICF2G630296247         | 24199975 | A | 0   | 0      | G |
| 11 | BICF2G630296257         | 24218547 | C | 0   | 0      | A |
| 11 | BICF2G630296267         | 24238732 | G | 0   | 0      | A |
| 11 | BICF2G630296274         | 24248584 | A | 0   | 0      | G |
| 11 | BICF2G630296285         | 24276028 | A | 0   | 0      | G |
| 11 | BICF2G630296286         | 24282836 | G | 0   | 0      | A |
| 11 | BICF2S23052880          | 24325837 | G | 0   | 0      | C |
| 11 | BICF2S23052495          | 24339470 | A | 0   | 0.6429 | G |
| 11 | BICF2P728492            | 24355939 | G | 1   | 1      | A |

|    |                         |          |   |     |        |   |
|----|-------------------------|----------|---|-----|--------|---|
| 11 | BICF2G630296326         | 24357586 | A | 0   | 0      | G |
| 11 | BICF2G630296336         | 24378992 | C | 0   | 0      | A |
| 11 | BICF2G630296343         | 24380673 | A | 0   | 0      | G |
| 11 | BICF2G630296369         | 24396615 | G | 0   | 0      | A |
| 11 | BICF2S23310692          | 24403630 | 0 | 0   | 0      | G |
| 11 | BICF2G630296430         | 24434245 | G | 0.5 | 0.8571 | A |
| 11 | BICF2S2334228           | 24457819 | G | 0   | 0      | A |
| 11 | BICF2P351697            | 24470396 | A | 0   | 0      | G |
| 11 | BICF2G630296486         | 24470485 | C | 0   | 0      | G |
| 11 | BICF2G630296520         | 24484419 | G | 0   | 0      | A |
| 11 | BICF2G630296551         | 24498328 | G | 0   | 0      | A |
| 11 | BICF2P1183915           | 24517274 | A | 0   | 0.2857 | G |
| 11 | BICF2S23644722          | 24519194 | 0 | 0   | 0      | G |
| 11 | BICF2P614788            | 24548562 | A | 0   | 0.2857 | G |
| 11 | BICF2G630296566         | 24558851 | A | 0   | 0      | G |
| 11 | BICF2P636063            | 24566381 | 0 | 0   | 0      | G |
| 11 | BICF2G630296568         | 24576819 | 0 | 0   | 0      | G |
| 11 | BICF2P1122151           | 24597873 | A | 0.5 | 0.7857 | G |
| 11 | BICF2G630296576         | 24607183 | 0 | 0   | 0      | G |
| 11 | BICF2G630296581         | 24611572 | C | 0   | 0      | A |
| 11 | TIGRP2P148511_rs8680143 | 24626538 | 0 | 0   | 0      | G |
| 11 | BICF2G630296622         | 24634760 | A | 1   | 0.3571 | G |
| 11 | BICF2G630296638         | 24652556 | C | 0   | 0      | G |
| 11 | BICF2G630296639         | 24657822 | G | 0.5 | 0.1429 | A |
| 11 | BICF2G630296647         | 24669458 | G | 0.5 | 0.1429 | A |
| 11 | BICF2G630296669         | 24686919 | G | 0   | 0      | A |
| 11 | BICF2P1445042           | 24693691 | C | 0.5 | 0.8571 | A |
| 11 | BICF2S23023183          | 24694613 | A | 0.5 | 0.8571 | G |
| 11 | BICF2S23759717          | 24703980 | A | 0   | 0      | G |
| 11 | BICF2P1382218           | 24719635 | G | 0   | 0.6429 | A |
| 11 | BICF2G630296690         | 24732205 | G | 0   | 0.6667 | A |
| 11 | BICF2G630296698         | 24734012 | A | 0   | 0.6429 | G |
| 11 | BICF2G630296731         | 24743173 | A | 0.5 | 0.8571 | G |
| 11 | BICF2G630296745         | 24751209 | A | 0.5 | 0.1429 | G |
| 11 | BICF2G630296750         | 24770055 | G | 0.5 | 0.8571 | A |
| 11 | BICF2G630296752         | 24780654 | G | 0   | 0      | A |
| 11 | BICF2P479608            | 24788637 | G | 0.5 | 0.8571 | A |
| 11 | BICF2G630296768         | 24813153 | A | 0   | 0      | C |
| 11 | BICF2S22923056          | 24820481 | C | 1   | 0.3571 | A |
| 11 | BICF2P1304051           | 24841623 | A | 0.5 | 0.8571 | G |
| 11 | BICF2P370338            | 24861858 | A | 0   | 0      | G |
| 11 | BICF2G630296772         | 24891056 | 0 | 0   | 0      | G |
| 11 | BICF2G630296774         | 24905573 | 0 | 0   | 0      | T |
| 11 | BICF2P1264007           | 24912956 | 0 | 0   | 0      | T |
| 11 | BICF2G630296778         | 24928929 | A | 0   | 0      | T |
| 11 | BICF2G630296790         | 24933939 | A | 0.5 | 0.4286 | G |
| 11 | BICF2P662094            | 24943622 | A | 0.5 | 0.5    | G |

|    |                 |          |   |     |        |   |
|----|-----------------|----------|---|-----|--------|---|
| 11 | BICF2G630296793 | 24961266 | A | 0   | 0.25   | C |
| 11 | BICF2G630296804 | 24970373 | 0 | 0   | 0      | A |
| 11 | BICF2G630296809 | 24979068 | 0 | 0   | 0      | G |
| 11 | BICF2P496829    | 24991882 | A | 0   | 0.2857 | G |
| 11 | BICF2G630296829 | 24997766 | C | 0   | 0      | A |
| 11 | BICF2G630296845 | 25001074 | G | 0   | 0      | A |
| 11 | BICF2G630296869 | 25018436 | C | 0.5 | 0.7857 | A |
| 11 | BICF2G630296877 | 25030529 | A | 0   | 0      | T |
| 11 | BICF2G630296908 | 25046640 | A | 0   | 0      | G |
| 11 | BICF2P725682    | 25048477 | A | 0   | 0      | G |
| 11 | BICF2G630296920 | 25059021 | A | 0   | 0      | G |
| 11 | BICF2G630296925 | 25064966 | A | 0   | 0      | G |
| 11 | BICF2G630296933 | 25078190 | C | 0   | 0      | A |
| 11 | BICF2G630296936 | 25081603 | A | 0   | 0      | G |
| 11 | BICF2G630296947 | 25086727 | G | 0   | 0      | A |
| 11 | BICF2G630296958 | 25097275 | A | 0   | 0      | G |
| 11 | BICF2G630296975 | 25105818 | G | 1   | 1      | A |
| 11 | BICF2G630296982 | 25121723 | A | 1   | 1      | G |
| 11 | BICF2G630296983 | 25125112 | A | 1   | 1      | G |
| 11 | BICF2G630297001 | 25131381 | G | 0   | 0      | A |
| 11 | BICF2G630297015 | 25140485 | C | 1   | 1      | A |
| 11 | BICF2G630297036 | 25153145 | C | 1   | 1      | A |
| 11 | BICF2P37395     | 25185645 | A | 0   | 0      | G |
| 11 | BICF2P127301    | 25206568 | G | 1   | 0.7143 | A |
| 11 | BICF2G630297086 | 25209601 | A | 0   | 0.2857 | G |
| 11 | BICF2G630297106 | 25220179 | A | 1   | 1      | G |
| 11 | BICF2G630297123 | 25240522 | T | 0   | 0      | A |
| 11 | BICF2P1339679   | 25244580 | G | 0   | 0      | A |
| 11 | BICF2G630297126 | 25257315 | G | 0.5 | 0.7857 | A |
| 11 | BICF2G630297140 | 25266339 | G | 0.5 | 0.7857 | A |
| 11 | BICF2P1197232   | 25267896 | G | 0   | 0.6667 | A |
| 11 | BICF2G630297175 | 25299438 | C | 0   | 0.2857 | A |
| 11 | BICF2G630297179 | 25300528 | A | 0   | 0      | G |
| 11 | BICF2P1291816   | 25315340 | G | 0   | 0.2857 | A |
| 11 | BICF2S23414290  | 25327483 | 0 | 0   | 0      | A |
| 11 | BICF2G630297216 | 25379633 | G | 0   | 0      | A |
| 11 | BICF2G630297221 | 25386335 | C | 0.5 | 0.5    | A |
| 11 | BICF2P895958    | 25392093 | G | 0   | 0.2857 | A |
| 11 | BICF2G630297229 | 25405929 | C | 0   | 0      | G |
| 11 | BICF2G630297240 | 25418914 | G | 0   | 0      | A |
| 11 | BICF2G630297245 | 25426877 | A | 0   | 0.2857 | G |
| 11 | BICF2G630297264 | 25463498 | A | 0.5 | 0.5    | G |
| 11 | BICF2G630297267 | 25468062 | A | 0   | 0.2857 | G |
| 11 | BICF2G630297270 | 25475413 | A | 0.5 | 0.5    | G |
| 11 | BICF2G630297272 | 25486064 | G | 0.5 | 0.5    | C |
| 11 | BICF2G630297299 | 25518918 | A | 0   | 0.2857 | G |
| 11 | BICF2G630297306 | 25531123 | A | 0   | 0      | G |

|    |                         |          |   |     |        |   |
|----|-------------------------|----------|---|-----|--------|---|
| 11 | BICF2G630297314         | 25550667 | C | 0   | 0      | A |
| 11 | BICF2G630297316         | 25558273 | G | 0   | 0      | A |
| 11 | BICF2S23716451          | 25599398 | A | 1   | 0.7143 | C |
| 11 | BICF2G630297325         | 25615313 | G | 1   | 0.3571 | C |
| 11 | BICF2G630297338         | 25632611 | G | 0   | 0.6429 | A |
| 11 | BICF2G630297344         | 25642624 | A | 0   | 0      | G |
| 11 | BICF2G630297350         | 25645608 | G | 0   | 0.6429 | A |
| 11 | BICF2P1032572           | 25672268 | A | 0   | 0      | G |
| 11 | BICF2S23610823          | 25690067 | A | 1   | 0.3571 | G |
| 11 | BICF2G630297366         | 25702434 | A | 0   | 0      | G |
| 11 | BICF2G630297368         | 25706808 | G | 1   | 0.3571 | A |
| 11 | BICF2S23329243          | 25727796 | A | 1   | 0.7143 | G |
| 11 | BICF2S23353200          | 25744875 | A | 1   | 0.7143 | G |
| 11 | BICF2G630297399         | 25778877 | A | 0   | 0      | G |
| 11 | BICF2G630297411         | 25793959 | A | 0   | 0      | C |
| 11 | BICF2P101144            | 25804529 | 0 | 0   | 0      | A |
| 11 | BICF2G630297428         | 25810179 | A | 0   | 0      | G |
| 11 | BICF2G630297447         | 25819421 | A | 0   | 0      | G |
| 11 | BICF2G630297466         | 25828804 | T | 0   | 0      | A |
| 11 | BICF2G630297492         | 25852185 | G | 0   | 0      | A |
| 11 | BICF2P875880            | 25865078 | A | 0   | 0      | G |
| 11 | BICF2G630297504         | 25879693 | G | 0   | 0      | A |
| 11 | BICF2G630297520         | 25899899 | A | 0   | 0      | G |
| 11 | BICF2G630297541         | 25926297 | A | 1   | 0.7143 | G |
| 11 | BICF2S23521165          | 25941449 | G | 0   | 0.3571 | A |
| 11 | BICF2G630297543         | 25966667 | G | 0.5 | 0.5    | A |
| 11 | BICF2S2375173           | 25972581 | A | 0   | 0.3571 | G |
| 11 | BICF2P1226927           | 25982652 | 0 | 0   | 0      | G |
| 11 | BICF2P65307             | 26013333 | 0 | 0   | 0      | G |
| 11 | BICF2S2414118           | 26037471 | 0 | 0   | 0      | A |
| 11 | TIGRP2P148546_rs8528869 | 26060182 | 0 | 0   | 0      | A |
| 11 | BICF2P876961            | 26079913 | 0 | 0   | 0      | C |
| 11 | BICF2P1148389           | 26084731 | A | 0.5 | 0.1429 | G |
| 11 | BICF2G630297548         | 26098724 | 0 | 0   | 0      | A |
| 11 | BICF2G630297554         | 26115342 | A | 0   | 0      | C |
| 11 | BICF2S23258056          | 26120879 | A | 0   | 0      | G |
| 11 | BICF2G630297560         | 26145931 | A | 0.5 | 0.7857 | C |
| 11 | BICF2G630297573         | 26158152 | G | 0   | 0.3571 | C |
| 11 | BICF2G630297580         | 26165198 | G | 1   | 0.7143 | A |
| 11 | BICF2G630297591         | 26180398 | G | 0.5 | 0.5    | A |
| 11 | BICF2P1377315           | 26193267 | A | 0   | 0.2857 | G |
| 11 | BICF2G630297603         | 26197240 | G | 0   | 0.6429 | A |
| 11 | BICF2S23417045          | 26211330 | C | 0   | 0.2857 | A |
| 11 | BICF2G630297618         | 26229451 | A | 0   | 0.6429 | G |
| 11 | BICF2G630297621         | 26242406 | A | 0.5 | 0.5714 | G |
| 11 | BICF2G630297624         | 26244338 | G | 0.5 | 0.5714 | A |
| 11 | BICF2P1321302           | 26266110 | G | 0   | 0      | A |



|    |                 |          |   |     |        |   |
|----|-----------------|----------|---|-----|--------|---|
| 11 | BICF2S23136522  | 26298311 | A | 0   | 0.6429 | G |
| 11 | BICF2S22940429  | 26301963 | G | 0.5 | 0.1429 | A |
| 11 | BICF2P181297    | 26316215 | 0 | 0   | 0      | G |
| 11 | BICF2S23312875  | 26332457 | A | 0.5 | 0.8571 | G |
| 11 | BICF2S23226633  | 26352105 | G | 0.5 | 0.1429 | A |
| 11 | BICF2G630297665 | 26378815 | G | 0   | 0.2    | A |
| 11 | BICF2G630297667 | 26387396 | A | 0   | 0.2857 | C |
| 11 | BICF2G630297673 | 26393873 | G | 0   | 0.2857 | A |
| 11 | BICF2G630297680 | 26406412 | A | 0   | 0      | G |
| 11 | BICF2G630297694 | 26423705 | A | 0   | 0.2    | G |
| 11 | BICF2G630297714 | 26439355 | A | 0   | 0.2857 | G |
| 11 | BICF2G630297723 | 26457516 | G | 0   | 0.2857 | A |
| 11 | BICF2G630297725 | 26498904 | A | 0   | 0      | G |
| 11 | BICF2P1444826   | 26522158 | A | 0   | 0      | G |
| 11 | BICF2G630297726 | 26553130 | C | 0   | 0      | G |
| 11 | BICF2G630297750 | 26587399 | A | 0   | 0.3571 | G |
| 11 | BICF2S23621496  | 26590814 | 0 | 0   | 0      | A |
| 11 | BICF2P207137    | 26601801 | 0 | 0   | 0      | C |
| 11 | BICF2P1310551   | 26660532 | 0 | 0   | 0      | A |
| 11 | BICF2S23218774  | 26712280 | G | 0.5 | 0.7857 | A |
| 11 | BICF2S23012779  | 26720864 | A | 0.5 | 0.5    | G |
| 11 | BICF2P1167163   | 26727300 | G | 0.5 | 0.1429 | A |
| 11 | BICF2S23259395  | 26740651 | C | 0.5 | 0.1429 | G |
| 11 | BICF2P1410148   | 26741343 | G | 0.5 | 0.1429 | A |
| 11 | BICF2P1115719   | 26750935 | G | 0   | 0.3571 | A |
| 11 | BICF2P1168708   | 26776005 | A | 0.5 | 0.1429 | G |
| 11 | BICF2P607826    | 26784373 | G | 0.5 | 0.1429 | A |
| 11 | BICF2P933659    | 26799040 | A | 0   | 0.3571 | G |
| 11 | BICF2S2297605   | 26809269 | A | 0   | 0      | G |
| 11 | BICF2P75449     | 26818111 | A | 0   | 0.3571 | G |
| 11 | BICF2P994476    | 26835076 | 0 | 0   | 0      | G |
| 11 | BICF2S23231526  | 26870141 | A | 0   | 0.7    | G |
| 11 | BICF2P958706    | 26881208 | C | 0   | 0      | A |
| 11 | BICF2P1267606   | 26896436 | G | 0   | 0      | A |
| 11 | BICF2P1267604   | 26898595 | G | 0   | 0      | C |
| 11 | BICF2P1308802   | 26918900 | A | 0   | 0.6429 | C |
| 11 | BICF2S23040875  | 26949427 | A | 1   | 0.6429 | G |
| 11 | BICF2P844136    | 26963026 | A | 0   | 0.6429 | G |
| 11 | BICF2P950903    | 26977423 | A | 1   | 0.6429 | G |
| 11 | BICF2S22940836  | 26983919 | G | 0   | 0.3571 | A |
| 11 | BICF2P201440    | 26992470 | G | 0   | 0.3571 | A |
| 11 | BICF2S2309633   | 27003230 | T | 0   | 0.3571 | A |
| 11 | BICF2S23038563  | 27014247 | A | 0   | 0.2857 | C |
| 11 | BICF2P174860    | 27050246 | 0 | 0   | 0      | C |
| 11 | BICF2P95128     | 27060092 | 0 | 0   | 0      | A |
| 11 | BICF2G630297756 | 27078999 | A | 0   | 0.3571 | G |
| 11 | BICF2S23050947  | 27098600 | G | 1   | 0.7143 | A |

|    |                 |          |   |   |        |   |
|----|-----------------|----------|---|---|--------|---|
| 11 | BICF2G630297757 | 27109037 | G | 0 | 0.6429 | A |
| 11 | BICF2G630297770 | 27118428 | A | 0 | 0.6429 | G |
| 11 | BICF2G630297805 | 27132847 | A | 1 | 0.3571 | G |
| 11 | BICF2G630297820 | 27140083 | G | 0 | 0.3571 | A |
| 11 | BICF2G630297832 | 27156667 | C | 0 | 0.6429 | G |
| 11 | BICF2G630297841 | 27172565 | A | 0 | 0.3571 | G |
| 11 | BICF2P825425    | 27178549 | C | 0 | 0.3571 | A |
| 11 | BICF2P569995    | 27197653 | 0 | 0 | 0      | A |
| 11 | BICF2G630297868 | 27214445 | G | 0 | 0.3571 | A |
| 11 | BICF2S23420306  | 27238471 | C | 0 | 0      | A |
| 11 | BICF2G630297870 | 27245906 | A | 1 | 0.3571 | G |
| 11 | BICF2G630297875 | 27263499 | G | 0 | 0.6429 | A |
| 11 | BICF2G630297880 | 27277762 | C | 1 | 0.3571 | A |
| 11 | BICF2G630297881 | 27293720 | G | 0 | 0.6429 | A |
| 11 | BICF2G630297906 | 27306996 | G | 0 | 0.6429 | A |
| 11 | BICF2G630297911 | 27315445 | C | 0 | 0.6429 | A |
| 11 | BICF2G630297933 | 27356229 | A | 1 | 0.6429 | G |
| 11 | BICF2G630297939 | 27361028 | A | 1 | 0.3571 | G |
| 11 | BICF2G630297965 | 27378150 | A | 0 | 0.3571 | G |
| 11 | BICF2G630297979 | 27384781 | G | 1 | 0.3571 | A |
| 11 | BICF2G630297998 | 27397738 | A | 0 | 0.3571 | C |
| 11 | BICF2G630298000 | 27407655 | A | 0 | 0.6429 | G |
| 11 | BICF2G630298014 | 27416124 | C | 0 | 0.5    | A |
| 11 | BICF2G630298086 | 27472640 | A | 0 | 0.6429 | T |
| 11 | BICF2G630298088 | 27476204 | C | 0 | 0.3571 | G |
| 11 | BICF2P475432    | 27482607 | A | 0 | 0.2857 | G |
| 11 | BICF2G630298105 | 27484355 | G | 0 | 0.2857 | A |
| 11 | BICF2S2353548   | 27486294 | A | 0 | 0      | C |
| 11 | BICF2P640804    | 27505796 | 0 | 0 | 0      | A |
| 11 | BICF2P954878    | 27513097 | 0 | 0 | 0      | G |
| 11 | BICF2G630298108 | 27522872 | A | 0 | 0      | G |
| 11 | BICF2S2456129   | 27547013 | G | 1 | 0.3571 | C |
| 11 | G662f34S142     | 27554348 | C | 1 | 0.3333 | A |
| 11 | BICF2P1473023   | 27579198 | A | 1 | 0.6429 | C |
| 11 | BICF2G630298113 | 27591579 | A | 0 | 0.6429 | G |
| 11 | BICF2P983334    | 27601172 | C | 0 | 0.3571 | A |
| 11 | BICF2G630298133 | 27618732 | A | 0 | 0.6429 | C |
| 11 | BICF2G630298155 | 27625629 | A | 0 | 0      | G |
| 11 | BICF2G630298201 | 27658868 | G | 0 | 0      | A |
| 11 | BICF2G630298210 | 27673411 | G | 1 | 0.6429 | A |
| 11 | BICF2G630298249 | 27691581 | A | 0 | 0      | G |
| 11 | BICF2G630298252 | 27692549 | G | 0 | 0      | A |
| 11 | BICF2G630298288 | 27706944 | G | 0 | 0.125  | A |
| 11 | BICF2G630298294 | 27731303 | A | 0 | 0      | C |
| 11 | BICF2S22946260  | 27741478 | A | 0 | 0      | G |
| 11 | BICF2G630298303 | 27757207 | A | 0 | 0      | G |
| 11 | BICF2G630298305 | 27771034 | G | 0 | 0      | A |

|    |                 |          |   |     |        |   |
|----|-----------------|----------|---|-----|--------|---|
| 11 | BICF2S2354103   | 27780358 | G | 1   | 1      | A |
| 11 | BICF2G630298308 | 27803452 | A | 0.5 | 0.1429 | G |
| 11 | BICF2G630298330 | 27839302 | A | 0   | 0      | G |
| 11 | BICF2P1216930   | 27849026 | A | 0.5 | 0.1429 | G |
| 11 | BICF2G630298346 | 27859064 | G | 0.5 | 0.1429 | A |
| 11 | BICF2G630298351 | 27861509 | G | NA  | 0      | A |
| 11 | BICF2G630298354 | 27866895 | A | 0   | 0      | G |
| 11 | BICF2P167768    | 27899467 | 0 | 0   | 0      | C |
| 11 | BICF2G630298355 | 27914311 | A | 0.5 | 0.5833 | C |
| 11 | BICF2P250950    | 27922188 | 0 | 0   | 0      | C |
| 11 | BICF2G630298356 | 27939754 | A | 0   | 0      | G |
| 11 | BICF2G630298358 | 27950424 | A | 1   | 1      | G |
| 11 | BICF2P281218    | 27952276 | G | 1   | 1      | A |
| 11 | BICF2G630298374 | 27959165 | G | 0   | 0      | A |
| 11 | BICF2P1090053   | 27971570 | A | 1   | 0.7143 | G |
| 11 | BICF2P1404198   | 27979701 | A | 0   | 0      | T |
| 11 | BICF2P171927    | 28009650 | G | 0   | 0.2857 | A |
| 11 | BICF2S23033910  | 28018338 | A | 0.5 | 0.1429 | G |
| 11 | BICF2P258967    | 28029058 | A | 0.5 | 0.4286 | G |
| 11 | BICF2P898775    | 28038434 | G | 0   | 0      | A |
| 11 | BICF2P478326    | 28056385 | G | 0   | 0      | A |
| 11 | G663f37S177     | 28076157 | G | 0   | 0      | A |
| 11 | BICF2S23751313  | 28096820 | G | 0   | 0      | A |
| 11 | BICF2G630298391 | 28111135 | C | 0   | 0      | A |
| 11 | BICF2G630298411 | 28119964 | G | 0   | 0      | A |
| 11 | BICF2G630298425 | 28132595 | A | 0.5 | 0.4286 | G |
| 11 | BICF2G630298432 | 28140922 | A | 0   | 0.2857 | G |
| 11 | BICF2G630298466 | 28166384 | G | 0   | 0.2857 | A |
| 11 | BICF2P423109    | 28185376 | A | 0.5 | 0.1429 | G |
| 11 | BICF2S23641753  | 28188784 | A | 0.5 | 0.1429 | G |
| 11 | BICF2G630298473 | 28193452 | A | 0   | 0      | G |
| 11 | BICF2G630298479 | 28200871 | G | 0.5 | 0.8571 | A |
| 11 | BICF2G630298492 | 28212318 | G | 0.5 | 0.8571 | A |
| 11 | BICF2G630298499 | 28216603 | G | 0   | 0      | A |
| 11 | BICF2G630298517 | 28226462 | G | 0   | 0      | C |
| 11 | BICF2P746164    | 28240808 | G | 0   | 0      | A |
| 11 | BICF2P1224532   | 28248203 | A | 0   | 0      | G |
| 11 | BICF2G630298548 | 28261043 | G | 0   | 0      | A |
| 11 | BICF2G630298570 | 28276024 | G | 0   | 0      | A |
| 11 | BICF2G630298573 | 28282214 | A | 0   | 0      | G |
| 11 | BICF2P929252    | 28307924 | 0 | 0   | 0      | G |
| 11 | BICF2G630298576 | 28335184 | 0 | 0   | 0      | A |
| 11 | BICF2S23233885  | 28342874 | C | 0.5 | 0.5714 | G |
| 11 | BICF2G630298577 | 28356276 | A | 0   | 0      | C |
| 11 | BICF2G630298578 | 28361012 | C | 0.5 | 0.1429 | A |
| 11 | BICF2G630298579 | 28388366 | A | 0.5 | 0.1429 | G |
| 11 | BICF2P1124809   | 28399353 | 0 | 0   | 0      | C |

|    |                         |          |   |     |        |   |
|----|-------------------------|----------|---|-----|--------|---|
| 11 | BICF2G630298580         | 28410096 | A | 0.5 | 0.1429 | G |
| 11 | BICF2G630298581         | 28430501 | A | 0   | 0      | G |
| 11 | BICF2G630298583         | 28455287 | A | 0   | 0      | G |
| 11 | BICF2G630298597         | 28496564 | G | 1   | 1      | A |
| 11 | BICF2G630298666         | 28517301 | T | 0.5 | 0.4286 | A |
| 11 | BICF2G630298685         | 28539761 | G | 0   | 0      | A |
| 11 | BICF2G630298745         | 28559300 | A | NA  | 0      | C |
| 11 | BICF2G630298762         | 28566339 | G | 0.5 | 0.5714 | A |
| 11 | BICF2G630298789         | 28577556 | A | 0   | 0      | G |
| 11 | TIGRP2P148661_rs9006547 | 28599121 | 0 | 0   | 0      | C |
| 11 | BICF2G630298793         | 28607134 | G | 0.5 | 0.5714 | A |
| 11 | BICF2P393214            | 28615434 | 0 | 0   | 0      | A |
| 11 | BICF2G630298794         | 28651487 | A | 0.5 | 0.1429 | T |
| 11 | BICF2G630298799         | 28716419 | G | 0.5 | 0.1429 | A |
| 11 | BICF2P345763            | 28728371 | 0 | 0   | 0      | A |
| 11 | BICF2G630298800         | 28760284 | A | 0   | 0      | G |
| 11 | BICF2P849339            | 28763004 | 0 | 0   | 0      | G |
| 11 | BICF2G630298803         | 28787491 | T | 0   | 0      | A |
| 11 | BICF2P171735            | 28817771 | 0 | 0   | 0      | A |
| 11 | BICF2P1030319           | 28833129 | 0 | 0   | 0      | A |
| 11 | BICF2G630298808         | 28844990 | G | 0   | 0      | A |
| 11 | BICF2P556718            | 28861743 | 0 | 0   | 0      | G |
| 11 | BICF2G630298816         | 28873806 | C | 0   | 0      | A |
| 11 | BICF2G630298827         | 28879387 | A | 0   | 0.3571 | G |
| 11 | BICF2S23319762          | 28893102 | A | 0.5 | 0.5    | G |
| 11 | BICF2G630298853         | 28901872 | A | 0.5 | 0.5    | G |
| 11 | BICF2G630298866         | 28915373 | G | 0.5 | 0.5    | A |
| 11 | BICF2G630298870         | 28927434 | A | 0.5 | 0.5    | G |
| 11 | BICF2S2332622           | 28945193 | A | 0   | 0      | G |
| 11 | BICF2G630298878         | 28961279 | G | 0   | 0.2857 | A |
| 11 | BICF2S2443329           | 28983662 | A | 0.5 | 0.4286 | C |
| 11 | BICF2G630298885         | 28992936 | A | 0.5 | 0.2143 | C |
| 11 | BICF2P428253            | 29025093 | 0 | 0   | 0      | A |
| 11 | BICF2G630298888         | 29032242 | A | 0   | 0.2857 | G |
| 11 | BICF2G630298893         | 29052790 | A | 0   | 0      | G |
| 11 | BICF2G630298905         | 29067632 | C | 1   | 0.3571 | A |
| 11 | BICF2G630298908         | 29078383 | A | 1   | 0.3571 | G |
| 11 | BICF2G630298911         | 29084163 | G | 1   | 1      | A |
| 11 | BICF2G630298921         | 29095243 | A | 0   | 0      | G |
| 11 | BICF2G630298932         | 29112972 | A | 0.5 | 0.2143 | G |
| 11 | BICF2G630298939         | 29126554 | G | 0.5 | 0.2143 | A |
| 11 | BICF2P149301            | 29138165 | G | 0.5 | 0.5    | A |
| 11 | BICF2G630298944         | 29141967 | A | 0   | 0.2857 | G |
| 11 | BICF2G630298954         | 29157734 | A | 0   | 0.2857 | G |
| 11 | BICF2G630298998         | 29170379 | G | 0   | 0.2857 | A |
| 11 | BICF2G630299009         | 29184586 | C | 0.5 | 0.2143 | A |
| 11 | BICF2G630299021         | 29196397 | A | 0   | 0      | G |

|    |                         |          |   |     |        |   |
|----|-------------------------|----------|---|-----|--------|---|
| 11 | BICF2G630299027         | 29214251 | A | 0   | 0.3571 | G |
| 11 | BICF2G630299037         | 29228815 | G | 0   | 0      | A |
| 11 | BICF2G630299043         | 29234329 | A | 0   | 0      | G |
| 11 | BICF2G630299060         | 29251608 | G | 0   | 0.3571 | A |
| 11 | BICF2G630299067         | 29256521 | A | 0   | 0.3571 | G |
| 11 | BICF2G630299090         | 29288989 | A | 0   | 0.3571 | G |
| 11 | BICF2P228229            | 29315825 | 0 | 0   | 0      | A |
| 11 | BICF2P491485            | 29338197 | 0 | 0   | 0      | C |
| 11 | TIGRP2P148678_rs9184266 | 29360374 | 0 | 0   | 0      | A |
| 11 | BICF2G630299096         | 29388941 | G | 0   | 0      | A |
| 11 | BICF2P1184335           | 29408620 | 0 | 0   | 0      | A |
| 11 | BICF2S23115602          | 29420578 | A | 0   | 0.2857 | G |
| 11 | BICF2P761182            | 29432661 | 0 | 0   | 0      | A |
| 11 | BICF2P319178            | 29444514 | 0 | 0   | 0      | A |
| 11 | BICF2P1365549           | 29456749 | 0 | 0   | 0      | A |
| 11 | BICF2G630299099         | 29470043 | A | 0.5 | 0.2143 | G |
| 11 | BICF2G630299100         | 29492186 | C | 0   | 0      | A |
| 11 | BICF2P824932            | 29504143 | 0 | 0   | 0      | A |
| 11 | BICF2P766591            | 29512692 | 0 | 0   | 0      | G |
| 11 | BICF2P620360            | 29523647 | G | 0.5 | 0.2143 | A |
| 11 | G664f19S194             | 29548643 | 0 | 0   | 0      | C |
| 11 | BICF2P689261            | 29565114 | A | 0.5 | 0.4286 | G |
| 11 | BICF2G630299103         | 29570581 | A | 0   | 0      | G |
| 11 | BICF2P701388            | 29579089 | 0 | 0   | 0      | C |
| 11 | BICF2P663715            | 29633998 | G | 0.5 | 0.4286 | A |
| 11 | BICF2S23434630          | 29654371 | G | 0.5 | 0.5714 | A |
| 11 | BICF2P520021            | 29676429 | A | 0.5 | 0.5714 | G |
| 11 | BICF2P714250            | 29683230 | C | 0.5 | 0.5714 | G |
| 11 | BICF2G630299110         | 29694574 | A | 0.5 | 0.2143 | G |
| 11 | BICF2G630299111         | 29705315 | A | 0   | 0      | G |
| 11 | BICF2S23160325          | 29734366 | G | 0.5 | 0.2143 | A |
| 11 | BICF2S23150627          | 29747289 | A | 0.5 | 0.2143 | G |
| 11 | BICF2P1142593           | 29755085 | G | 0.5 | 0.4286 | C |
| 11 | BICF2G630299125         | 29766811 | A | 0   | 0      | G |
| 11 | BICF2G630299132         | 29775704 | G | 0   | 0.2857 | A |
| 11 | BICF2G630299139         | 29813989 | A | 0   | 0      | G |
| 11 | BICF2G630299145         | 29828468 | A | 0   | 0      | G |
| 11 | BICF2G630299160         | 29837082 | G | NA  | 0      | A |
| 11 | BICF2P578001            | 29837633 | A | 0   | 0.2857 | G |
| 11 | BICF2G630299180         | 29858752 | G | 0   | 0      | A |
| 11 | BICF2S2308967           | 29874625 | G | 0   | 0.3571 | A |
| 11 | BICF2P1047482           | 29877367 | A | 0   | 0      | C |
| 11 | BICF2G630299241         | 29900158 | G | 1   | 0.7143 | A |
| 11 | BICF2G630299277         | 29919965 | A | 0.5 | 0.1429 | G |
| 11 | BICF2G630299281         | 29923010 | A | 0.5 | 0.1429 | G |
| 11 | BICF2G630299297         | 29941783 | G | 0.5 | 0.1429 | A |
| 11 | BICF2G630299301         | 29948566 | G | 0   | 0      | A |

|    |                         |          |   |     |        |   |
|----|-------------------------|----------|---|-----|--------|---|
| 11 | BICF2G630299309         | 29970738 | G | 0   | 0.3571 | A |
| 11 | BICF2P205773            | 29988601 | A | 0.5 | 0.2143 | G |
| 11 | BICF2P453030            | 30002381 | A | 0.5 | 0.5    | C |
| 11 | BICF2P386951            | 30034722 | A | 0.5 | 0.1429 | T |
| 11 | BICF2P413264            | 30042053 | A | 0.5 | 0.2143 | T |
| 11 | BICF2G630299334         | 30049507 | A | 0.5 | 0.1429 | G |
| 11 | BICF2S23248430          | 30064091 | C | 0.5 | 0.2143 | A |
| 11 | BICF2G630299341         | 30073823 | A | 0   | 0.3571 | T |
| 11 | BICF2G630299358         | 30090955 | A | 0   | 0.2857 | G |
| 11 | BICF2G630299365         | 30097935 | G | 0   | 0      | A |
| 11 | BICF2G630299385         | 30114710 | A | 0   | 0.3571 | C |
| 11 | BICF2G630299391         | 30124945 | C | NA  | 0.5    | A |
| 11 | BICF2G630299434         | 30158383 | A | 0.5 | 0.5    | C |
| 11 | BICF2G630299444         | 30166071 | A | 0   | 0.3571 | C |
| 11 | BICF2P118018            | 30199184 | A | 1   | 0.7143 | G |
| 11 | BICF2P27204             | 30221624 | A | 0   | 0      | G |
| 11 | BICF2P694211            | 30228435 | G | 0   | 0      | A |
| 11 | BICF2G630299584         | 30241448 | G | 0   | 0      | A |
| 11 | BICF2G630299587         | 30245842 | 0 | 0   | 0      | G |
| 11 | BICF2G630299599         | 30252648 | C | 0   | 0      | A |
| 11 | BICF2P197587            | 30271820 | A | 0.5 | 0.2143 | G |
| 11 | BICF2G630299629         | 30280602 | G | 0.5 | 0.2143 | A |
| 11 | BICF2G630299644         | 30292837 | G | 0.5 | 0.2143 | A |
| 11 | BICF2G630299668         | 30323727 | A | 0.5 | 0.5    | C |
| 11 | BICF2G630299669         | 30323849 | G | 0.5 | 0.5    | A |
| 11 | BICF2G630299705         | 30351070 | A | 0.5 | 0.5    | G |
| 11 | BICF2G630299746         | 30366466 | A | 0   | 0      | G |
| 11 | BICF2G630299754         | 30372942 | A | 0   | 0      | G |
| 11 | BICF2G630299795         | 30392231 | G | 0   | 0      | A |
| 11 | BICF2G630299803         | 30398092 | G | 0.5 | 0.5    | A |
| 11 | BICF2P1291045           | 30411265 | A | 0.5 | 0.5    | G |
| 11 | BICF2G630299830         | 30420453 | A | 1   | 0.6429 | G |
| 11 | BICF2P1116154           | 30440286 | 0 | 0   | 0      | A |
| 11 | TIGRP2P148773_rs8675875 | 30454705 | 0 | 0   | 0      | G |
| 11 | BICF2S23749357          | 30466990 | 0 | 0   | 0      | G |
| 11 | TIGRP2P148775_rs8835522 | 30491774 | 0 | 0   | 0      | A |
| 11 | G665f49S129             | 30503115 | A | 0   | 0      | C |
| 11 | BICF2S23649890          | 30534383 | A | 1   | 1      | G |
| 11 | BICF2S23410619          | 30559902 | A | 1   | 1      | G |
| 11 | BICF2S22941236          | 30575254 | C | 1   | 1      | A |
| 11 | BICF2P1159169           | 30604687 | A | 0   | 0.3571 | C |
| 11 | BICF2P1075328           | 30616829 | 0 | 0   | 0      | A |
| 11 | BICF2S23719313          | 30634806 | A | 0   | 0      | G |
| 11 | BICF2S23722377          | 30638025 | G | 0.5 | 0.2143 | A |
| 11 | BICF2G630299842         | 30653884 | A | 0   | 0.6429 | T |
| 11 | BICF2G630299855         | 30663037 | A | 0.5 | 0.8571 | G |
| 11 | BICF2G630299878         | 30679046 | G | 0   | 0.6429 | A |

|    |                         |          |   |     |        |   |
|----|-------------------------|----------|---|-----|--------|---|
| 11 | BICF2P438060            | 30682186 | C | 0   | 0.2857 | A |
| 11 | BICF2S2301099           | 30700717 | 0 | 0   | 0      | G |
| 11 | BICF2P1103444           | 30709456 | A | 0   | 0      | G |
| 11 | BICF2G630299892         | 30725940 | A | 0.5 | 0.5714 | G |
| 11 | BICF2G630299893         | 30730092 | C | 0.5 | 0.5833 | A |
| 11 | BICF2G630299896         | 30743666 | A | 0.5 | 0.5714 | G |
| 11 | BICF2S22911094          | 30771655 | A | 0.5 | 0.4286 | G |
| 11 | BICF2P344959            | 30778083 | A | 0.5 | 0.4286 | G |
| 11 | BICF2G630299908         | 30785969 | A | 0   | 0      | T |
| 11 | BICF2G630299915         | 30798206 | G | 0   | 0      | A |
| 11 | BICF2P110183            | 30817164 | A | 0.5 | 0.4286 | G |
| 11 | BICF2P826162            | 30821035 | G | 0.5 | 0.4286 | A |
| 11 | BICF2G630299923         | 30831530 | G | 0.5 | 0.5714 | A |
| 11 | TIGRP2P148781_rs8825996 | 30872930 | 0 | 0   | 0      | C |
| 11 | BICF2P506092            | 30882200 | 0 | 0   | 0      | T |
| 11 | BICF2G630299964         | 30890968 | G | 0.5 | 0.5714 | A |
| 11 | BICF2G630299989         | 30938113 | G | 0.5 | 0.5714 | A |
| 11 | BICF2G630300004         | 30952230 | G | 0.5 | 0.5714 | A |
| 11 | BICF2G630300011         | 30967754 | A | 0.5 | 0.5714 | G |
| 11 | BICF2G630300017         | 30981982 | A | 0.5 | 0.5714 | G |
| 11 | BICF2P1280996           | 31000020 | C | 0.5 | 0.5833 | A |
| 11 | BICF2G630300026         | 31006780 | A | 0   | 0      | G |
| 11 | BICF2P1083256           | 31019918 | G | 0.5 | 0.4286 | A |
| 11 | BICF2G630300032         | 31036888 | A | 0   | 0      | G |
| 11 | BICF2G630300034         | 31046373 | C | 0   | 0      | A |
| 11 | BICF2G630300035         | 31055308 | A | 0   | 0      | G |
| 11 | BICF2P117069            | 31072309 | T | 0.5 | 0.4286 | A |
| 11 | BICF2G630300036         | 31075391 | A | 0.5 | 0.5714 | G |
| 11 | BICF2S23429844          | 31095097 | A | 0.5 | 0.5    | G |
| 11 | BICF2G630300044         | 31096841 | G | 0.5 | 0.5    | A |
| 11 | BICF2G630300049         | 31114436 | G | 0   | 0      | A |
| 11 | BICF2G630300053         | 31122308 | A | 0   | 0      | G |
| 11 | BICF2G630300058         | 31134293 | A | 0   | 0      | G |
| 11 | BICF2G630300073         | 31146053 | G | 0.5 | 0.2143 | A |
| 11 | BICF2P1421775           | 31160215 | C | 0.5 | 0.7857 | A |
| 11 | BICF2G630300089         | 31173993 | A | 0   | 0      | G |
| 11 | BICF2P1077885           | 31193949 | 0 | 0   | 0      | G |
| 11 | BICF2G630300092         | 31211122 | G | 0   | 0      | A |
| 11 | BICF2G630300123         | 31227157 | A | 0   | 0.2857 | G |
| 11 | TIGRP2P148797_rs8659542 | 31236607 | 0 | 0   | 0      | G |
| 11 | BICF2G630300145         | 31265353 | A | 0   | 0.2857 | G |
| 11 | BICF2G630300159         | 31281993 | C | 0   | 0      | G |
| 11 | BICF2G630300171         | 31298644 | A | 0   | 0      | G |
| 11 | BICF2S22943906          | 31325382 | G | 0   | 0      | A |
| 11 | BICF2G630300189         | 31336671 | G | 0   | 0      | A |
| 11 | BICF2G630300194         | 31340973 | A | 0   | 0      | G |
| 11 | BICF2G630300209         | 31350118 | A | 0   | 0      | C |

|    |                         |          |   |     |        |   |
|----|-------------------------|----------|---|-----|--------|---|
| 11 | BICF2G630300219         | 31361591 | A | 0   | 0      | G |
| 11 | BICF2G630300229         | 31378579 | G | 0   | 0      | A |
| 11 | BICF2G630300252         | 31392418 | G | 0   | 0      | A |
| 11 | BICF2G630300261         | 31395067 | G | 0   | 0      | A |
| 11 | BICF2G630300277         | 31412024 | A | 0   | 0      | G |
| 11 | BICF2G630300288         | 31418816 | G | 0   | 0      | A |
| 11 | BICF2G630300329         | 31440525 | A | 0   | 0      | G |
| 11 | BICF2G630300331         | 31442913 | G | 0.5 | 0.2143 | A |
| 11 | BICF2G630300353         | 31457345 | G | 0   | 0      | A |
| 11 | BICF2G630300400         | 31468002 | C | 0   | 0      | A |
| 11 | BICF2G630300427         | 31476643 | G | 0   | 0      | A |
| 11 | BICF2P850139            | 31493818 | G | 0   | 0      | A |
| 11 | BICF2G630300464         | 31504657 | G | 0.5 | 0.2143 | A |
| 11 | BICF2P369907            | 31510215 | A | 0   | 0.2857 | G |
| 11 | BICF2G630300493         | 31543485 | G | 0.5 | 0.5    | A |
| 11 | BICF2G630300525         | 31552521 | A | 0   | 0      | G |
| 11 | BICF2G630300537         | 31569508 | A | 0   | 0      | G |
| 11 | BICF2G630300545         | 31578686 | T | 1   | 0.7143 | A |
| 11 | BICF2G630300547         | 31580822 | G | 0.5 | 0.5    | A |
| 11 | BICF2P988995            | 31590905 | G | 0.5 | 0.7857 | A |
| 11 | BICF2P632834            | 31604573 | A | 0.5 | 0.7857 | G |
| 11 | BICF2S23029239          | 31614729 | A | 0   | 0      | G |
| 11 | TIGRP2P148799_rs9207592 | 31639262 | 0 | 0   | 0      | A |
| 11 | BICF2G630300573         | 31653181 | A | 0.5 | 0.5    | G |
| 11 | BICF2P929963            | 31670818 | G | 0   | 0.2857 | A |
| 11 | BICF2P836237            | 31679018 | G | 0   | 0.2857 | A |
| 11 | BICF2P1317494           | 31688749 | A | 0.5 | 0.5    | T |
| 11 | BICF2G630300588         | 31694583 | A | 0.5 | 0.5    | C |
| 11 | BICF2G630300623         | 31709653 | G | 0.5 | 0.2143 | A |
| 11 | BICF2G630300626         | 31735040 | G | 0   | 0.25   | A |
| 11 | BICF2G630300632         | 31747010 | A | 0   | 0      | G |
| 11 | BICF2P1426766           | 31757647 | 0 | 0   | 0      | A |
| 11 | BICF2G630300633         | 31769800 | A | 0   | 0.2857 | G |
| 11 | BICF2S23231865          | 31779374 | A | 0   | 0.25   | G |
| 11 | BICF2G630300646         | 31791235 | C | 0.5 | 0.5    | A |
| 11 | BICF2G630300662         | 31797835 | G | 0.5 | 0.5    | A |
| 11 | BICF2G630300683         | 31819146 | A | 0.5 | 0.5    | G |
| 11 | BICF2G630300689         | 31831896 | G | 0   | 0      | A |
| 11 | BICF2G630300692         | 31841509 | G | 0   | 0.2857 | A |
| 11 | BICF2G630300697         | 31843624 | G | 0   | 0.2857 | A |
| 11 | BICF2G630300746         | 31856494 | C | 0   | 0      | A |
| 11 | BICF2G630300749         | 31869786 | G | 0   | 0.2857 | A |
| 11 | BICF2P775801            | 31891444 | A | 0   | 0      | G |
| 11 | BICF2S23057473          | 31903227 | C | 0   | 0      | A |
| 11 | BICF2P281857            | 31932220 | A | 0   | 0      | G |
| 11 | BICF2S2345606           | 31939564 | G | 0   | 0      | A |
| 11 | BICF2P216288            | 31947169 | A | 0   | 0      | G |



|    |                         |          |   |     |        |   |
|----|-------------------------|----------|---|-----|--------|---|
| 11 | BICF2P239310            | 31959950 | A | 0   | 0      | C |
| 11 | BICF2P254861            | 31975811 | G | 0   | 0      | A |
| 11 | BICF2S231270            | 31988752 | A | 0.5 | 0.2143 | G |
| 11 | BICF2S2359799           | 32003801 | 0 | 0   | 0      | G |
| 11 | BICF2S23517990          | 32007662 | 0 | 0   | 0      | G |
| 11 | BICF2P457249            | 32033525 | C | 0   | 0.125  | A |
| 11 | BICF2P967438            | 32043400 | A | 0.5 | 0.2143 | T |
| 11 | BICF2P1361908           | 32058462 | A | 0.5 | 0.7857 | G |
| 11 | BICF2P379994            | 32069518 | A | 0.5 | 0.2143 | G |
| 11 | BICF2P1266709           | 32077561 | C | 0.5 | 0.2143 | A |
| 11 | BICF2P222288            | 32093156 | T | 0.5 | 0.7857 | A |
| 11 | BICF2S23517020          | 32099444 | A | 0.5 | 0.7857 | G |
| 11 | BICF2S23047210          | 32115719 | A | 1   | 0.7143 | G |
| 11 | BICF2P695900            | 32126031 | A | 0   | 0      | G |
| 11 | BICF2P1033624           | 32142140 | G | 0   | 0.2857 | C |
| 11 | BICF2P454456            | 32175491 | A | 0   | 0      | C |
| 11 | BICF2S23434478          | 32205124 | 0 | 0   | 0      | G |
| 11 | BICF2P1003706           | 32231884 | G | 0   | 0      | A |
| 11 | BICF2P496658            | 32234990 | C | 0   | 0      | A |
| 11 | BICF2P1217773           | 32257923 | A | 0   | 0      | G |
| 11 | BICF2P50610             | 32270617 | A | 0   | 0      | T |
| 11 | TIGRP2P148821_rs8589376 | 32283217 | 0 | 0   | 0      | C |
| 11 | BICF2P155743            | 32295280 | A | 0.5 | 0.2143 | G |
| 11 | BICF2P952461            | 32304815 | 0 | 0   | 0      | A |
| 11 | BICF2S23426023          | 32321461 | A | 0.5 | 0.2143 | G |
| 11 | BICF2S2346546           | 32329573 | G | 0.5 | 0.2143 | A |
| 11 | BICF2S23517839          | 32339188 | G | 0.5 | 0.2143 | A |
| 11 | BICF2P1365122           | 32363758 | G | 0.5 | 0.2143 | A |
| 11 | BICF2P1365131           | 32366453 | G | 0.5 | 0.2143 | A |
| 11 | BICF2P493958            | 32405620 | A | 0   | 0.2857 | G |
| 11 | BICF2S22953867          | 32449706 | A | 0   | 0      | C |
| 11 | BICF2S23727561          | 32455639 | G | 0.5 | 0.5    | A |
| 11 | BICF2P363781            | 32466322 | G | 1   | 0.7143 | A |
| 11 | BICF2P1468476           | 32483896 | A | 0.5 | 0.5    | G |
| 11 | BICF2P955174            | 32496343 | A | 0.5 | 0.5    | G |
| 11 | BICF2P1329855           | 32503214 | G | 0   | 0      | A |
| 11 | BICF2P804663            | 32508839 | A | 0   | 0      | G |
| 11 | BICF2P809829            | 32511633 | A | 0.5 | 0.7857 | G |
| 11 | BICF2S23530335          | 32527913 | C | 0.5 | 0.5    | A |
| 11 | TIGRP2P148825_rs9197535 | 32548998 | 0 | 0   | 0      | A |
| 11 | BICF2S23255975          | 32559501 | A | 0.5 | 0.5    | G |
| 11 | BICF2P867682            | 32569849 | G | 0.5 | 0.2143 | A |
| 11 | BICF2P368366            | 32581541 | C | 0.5 | 0.2143 | A |
| 11 | BICF2P1467388           | 32597763 | A | 0   | 0.2857 | C |
| 11 | BICF2P1378120           | 32632797 | G | 0   | 0.2857 | A |
| 11 | BICF2P855505            | 32640665 | A | 0.5 | 0.2143 | G |
| 11 | BICF2P1336251           | 32658311 | 0 | 0   | 0      | G |

|    |                         |          |   |     |        |   |
|----|-------------------------|----------|---|-----|--------|---|
| 11 | BICF2P378996            | 32669668 | 0 | 0   | 0      | A |
| 11 | BICF2P205065            | 32672958 | 0 | 0   | 0      | A |
| 11 | BICF2S2413397           | 32690796 | C | 0   | 0      | A |
| 11 | G666f37S132             | 32700125 | 0 | 0   | 0      | A |
| 11 | BICF2S23232442          | 32722536 | 0 | 0   | 0      | G |
| 11 | BICF2P157878            | 32739496 | 0 | 0   | 0      | A |
| 11 | BICF2P1398049           | 32780836 | 0 | 0   | 0      | A |
| 11 | BICF2S2436574           | 32799092 | 0 | 0   | 0      | G |
| 11 | BICF2P56279             | 32813505 | A | 0.5 | 0.7857 | G |
| 11 | BICF2P1325239           | 32824323 | A | 0   | 0      | T |
| 11 | BICF2P522203            | 32836686 | T | 0.5 | 0.7    | A |
| 11 | BICF2P1429396           | 32853115 | G | 0   | 0      | A |
| 11 | TIGRP2P148830_rs8974133 | 32860574 | 0 | 0   | 0      | A |
| 11 | BICF2P217984            | 32871269 | 0 | 0   | 0      | A |
| 11 | BICF2P548063            | 32887744 | 0 | 0   | 0      | A |
| 11 | BICF2P1302782           | 32891174 | C | 0   | 0      | A |
| 11 | BICF2P531097            | 32908558 | C | 0.5 | 0.7857 | A |
| 11 | BICF2P1290820           | 32922914 | A | 0.5 | 0.7857 | G |
| 11 | BICF2P550340            | 32935770 | T | 0.5 | 0.2143 | A |
| 11 | BICF2S23260615          | 32968071 | A | 0.5 | 0.2143 | G |
| 11 | BICF2S23339423          | 32975713 | G | 0   | 0.2857 | A |
| 11 | BICF2S23341116          | 32995046 | G | 0.5 | 0.5    | A |
| 11 | BICF2P1031491           | 33027731 | G | 0   | 0.2857 | A |
| 11 | BICF2P1031492           | 33028837 | G | 0   | 0.2857 | A |
| 11 | BICF2P812943            | 33048789 | A | 0.5 | 0.2143 | G |
| 11 | BICF2P216928            | 33067902 | A | 0.5 | 0.2143 | G |
| 11 | BICF2P524836            | 33104002 | A | 0.5 | 0.2143 | C |
| 11 | BICF2S23654212          | 33138697 | A | 0   | 0      | C |
| 11 | BICF2P230882            | 33148870 | A | 0   | 0      | G |
| 11 | BICF2P608417            | 33159023 | A | 0   | 0      | C |
| 11 | BICF2P633536            | 33173437 | A | 0.5 | 0.2143 | G |
| 11 | BICF2P384490            | 33181506 | G | 0.5 | 0.7857 | A |
| 11 | BICF2P392327            | 33196301 | G | 0.5 | 0.7857 | A |
| 11 | BICF2S23550361          | 33212834 | A | 0.5 | 0.2143 | C |
| 11 | BICF2P990247            | 33237785 | G | 0.5 | 0.7857 | A |
| 11 | BICF2S23112023          | 33247837 | G | 0.5 | 0.7857 | A |
| 11 | BICF2P955410            | 33305204 | 0 | 0   | 0      | A |
| 11 | BICF2S22918349          | 33328562 | A | 0   | 0      | C |
| 11 | BICF2P1426297           | 33371657 | G | 0   | 0      | A |
| 11 | BICF2S23118050          | 33389565 | A | 0   | 0.2857 | C |
| 11 | BICF2P605886            | 33412035 | 0 | 0   | 0      | A |
| 11 | BICF2S2328043           | 33425537 | G | 0.5 | 0.7857 | A |
| 11 | BICF2S23631053          | 33455834 | G | 0.5 | 0.7857 | A |
| 11 | BICF2S22914838          | 33485591 | A | 1   | 1      | G |
| 11 | BICF2S2317338           | 33490088 | C | 1   | 1      | A |
| 11 | BICF2P143501            | 33503603 | 0 | 0   | 0      | A |
| 11 | BICF2S23159652          | 33522200 | C | 1   | 0.7143 | A |

|    |                |          |   |     |        |   |
|----|----------------|----------|---|-----|--------|---|
| 11 | BICF2P886238   | 33528677 | A | 1   | 0.7143 | G |
| 11 | BICF2P1310603  | 33547323 | C | 1   | 0.7143 | G |
| 11 | BICF2P357830   | 33559159 | A | 1   | 0.7143 | G |
| 11 | BICF2P707879   | 33574929 | 0 | 0   | 0      | A |
| 11 | BICF2P369872   | 33587601 | T | 0   | 0      | A |
| 11 | BICF2P1226314  | 33595884 | A | 0.5 | 0.7857 | G |
| 11 | BICF2S23021829 | 33605667 | G | 0   | 0      | A |
| 11 | BICF2P1396275  | 33619057 | A | 0   | 0      | G |
| 11 | BICF2P186836   | 33637558 | G | 1   | 1      | A |
| 11 | BICF2P964147   | 33651331 | G | 0   | 0.2857 | A |
| 11 | BICF2P299341   | 33662370 | A | 0   | 0.2857 | G |
| 11 | BICF2P578992   | 33683432 | G | 0.5 | 0.5    | A |
| 11 | BICF2P859534   | 33695190 | A | 0.5 | 0.5    | G |
| 11 | BICF2P1191626  | 33708767 | A | 0   | 0.2857 | G |
| 11 | BICF2P1011536  | 33718085 | G | 0.5 | 0.5    | A |
| 11 | BICF2P1054463  | 33737891 | C | 0.5 | 0.7857 | A |
| 11 | BICF2P914752   | 33742887 | A | 0.5 | 0.7857 | G |
| 11 | BICF2P574984   | 33755767 | G | 0.5 | 0.7857 | A |
| 11 | BICF2P365956   | 33765721 | 0 | 0   | 0      | A |
| 11 | BICF2P414306   | 33781985 | G | 1   | 1      | A |
| 11 | BICF2S23329510 | 33791316 | A | 1   | 1      | G |
| 11 | BICF2P1135619  | 33806530 | A | 1   | 1      | G |
| 11 | BICF2S23751452 | 33811404 | A | 0.5 | 0.2143 | C |
| 11 | BICF2S2362148  | 33828603 | A | 0   | 0      | G |
| 11 | BICF2P1353520  | 33837143 | A | 0   | 0      | G |
| 11 | BICF2P1425588  | 33847533 | A | 0   | 0      | G |
| 11 | BICF2S23657655 | 33861082 | G | 0   | 0      | C |
| 11 | BICF2P666228   | 33873353 | A | 0   | 0.2857 | G |
| 11 | BICF2P853493   | 33884943 | 0 | 0   | 0      | A |
| 11 | BICF2P1174922  | 33924830 | A | 0   | 0      | T |
| 11 | BICF2S2451861  | 33942981 | G | 0   | 0      | A |
| 11 | BICF2P1120035  | 33964419 | 0 | 0   | 0      | A |
| 11 | BICF2P280125   | 33993467 | A | 1   | 1      | G |
| 11 | BICF2P86237    | 33994661 | A | 1   | 1      | G |
| 11 | BICF2S23044477 | 34022888 | A | 1   | 1      | G |
| 11 | BICF2P148402   | 34032997 | A | 0   | 0.2857 | G |
| 11 | BICF2P670707   | 34044525 | A | 1   | 1      | G |
| 11 | BICF2S23446410 | 34059314 | A | 0   | 0      | G |
| 11 | BICF2P610556   | 34069446 | G | 1   | 1      | A |
| 11 | BICF2S23334009 | 34080733 | T | 0   | 0      | A |
| 11 | BICF2P990485   | 34092039 | G | 0   | 0      | A |
| 11 | BICF2P661307   | 34108550 | A | 0.5 | 0.7857 | G |
| 11 | BICF2P538485   | 34111675 | A | 0   | 0      | C |
| 11 | BICF2S23252598 | 34144515 | A | 0.5 | 0.2143 | G |
| 11 | BICF2S2341332  | 34172742 | G | 0.5 | 0.7857 | A |
| 11 | BICF2S23729958 | 34193349 | C | 0.5 | 0.2143 | A |
| 11 | BICF2S2321607  | 34201464 | G | 0.5 | 0.2143 | A |

|    |                         |          |   |     |        |   |
|----|-------------------------|----------|---|-----|--------|---|
| 11 | BICF2S23615280          | 34218888 | 0 | 0   | 0      | A |
| 11 | BICF2P842917            | 34226972 | 0 | 0   | 0      | G |
| 11 | BICF2S23521281          | 34245463 | G | 0   | 0      | A |
| 11 | BICF2S23047340          | 34249259 | C | 0   | 0      | A |
| 11 | BICF2P298512            | 34259099 | A | 0   | 0      | G |
| 11 | BICF2P757467            | 34292102 | A | 0.5 | 0.7857 | C |
| 11 | BICF2P1164880           | 34296082 | A | 0.5 | 0.7857 | G |
| 11 | BICF2S23011025          | 34299001 | C | 0   | 0      | G |
| 11 | BICF2P196716            | 34302752 | A | 0.5 | 0.8333 | C |
| 11 | TIGRP2P148897_rs8999430 | 34316715 | 0 | 0   | 0      | A |
| 11 | BICF2P435382            | 34338074 | G | 0   | 0      | A |
| 11 | BICF2P1279642           | 34341408 | G | 1   | 1      | A |
| 11 | BICF2P1213998           | 34364632 | A | 0   | 0      | G |
| 11 | BICF2P212917            | 34376386 | G | 0   | 0      | A |
| 11 | BICF2P960433            | 34390554 | A | 1   | 1      | G |
| 11 | BICF2P1221043           | 34397373 | 0 | 0   | 0      | A |
| 11 | BICF2P553157            | 34411060 | G | 0   | 0      | A |
| 11 | BICF2P534546            | 34432490 | A | 1   | 1      | G |
| 11 | BICF2P1396247           | 34453534 | 0 | 0   | 0      | G |
| 11 | BICF2P1395269           | 34477169 | A | 1   | 1      | C |
| 11 | BICF2P1145239           | 34510264 | G | 0   | 0      | A |
| 11 | BICF2P532323            | 34516636 | A | 0   | 0      | G |
| 11 | BICF2P86650             | 34547708 | G | 0   | 0      | A |
| 11 | BICF2P45825             | 34592984 | G | 0   | 0      | A |
| 11 | BICF2P61438             | 34605734 | G | 0   | 0      | A |
| 11 | BICF2P1252243           | 34644184 | A | 0   | 0      | G |
| 11 | BICF2P332582            | 34664793 | G | 0   | 0      | A |
| 11 | BICF2P1027048           | 34701927 | T | 0   | 0      | A |
| 11 | BICF2S2319080           | 34723330 | G | 0   | 0      | A |
| 11 | BICF2S23319292          | 34741189 | A | 0   | 0      | G |
| 11 | TIGRP2P148902_rs8661616 | 34744333 | 0 | 0   | 0      | A |
| 11 | BICF2P745082            | 34788633 | G | 0   | 0      | A |
| 11 | BICF2P932357            | 34813303 | G | 0   | 0      | A |
| 11 | BICF2P250902            | 34847251 | 0 | 0   | 0      | A |
| 11 | BICF2P996778            | 34870569 | 0 | 0   | 0      | G |
| 11 | BICF2P1041384           | 34883225 | 0 | 0   | 0      | A |
| 11 | BICF2P938867            | 34919023 | 0 | 0   | 0      | A |
| 11 | BICF2P597272            | 34931203 | C | 0   | 0      | A |
| 11 | BICF2S2445284           | 34963653 | 0 | 0   | 0      | G |
| 11 | BICF2S23150444          | 34981472 | G | 0   | 0      | A |
| 11 | BICF2P374651            | 35022362 | G | 0   | 0      | A |
| 11 | BICF2S2456012           | 35072830 | A | 0   | 0      | G |
| 11 | BICF2S23233743          | 35075473 | G | 0   | 0      | A |
| 11 | G667f23S183             | 35111671 | A | 0   | 0      | G |
| 11 | BICF2S2334417           | 35132197 | G | 0   | 0      | C |
| 11 | G668f35S129             | 35157341 | A | 0   | 0      | C |
| 11 | BICF2P1189606           | 35182734 | 0 | 0   | 0      | A |

|    |                |          |   |     |        |   |
|----|----------------|----------|---|-----|--------|---|
| 11 | BICF2S23424151 | 35191713 | G | 0   | 0      | A |
| 11 | BICF2S22916873 | 35207633 | A | 0   | 0      | G |
| 11 | BICF2S23161151 | 35214889 | A | 0   | 0      | C |
| 11 | BICF2S2301825  | 35228662 | A | 0   | 0      | C |
| 11 | BICF2P179452   | 35237304 | 0 | 0   | 0      | A |
| 11 | G669f13S175    | 35263745 | A | 0   | 0      | C |
| 11 | G670f34S196    | 35318966 | G | 0   | 0      | A |
| 11 | BICF2S23027422 | 35353553 | G | 0   | 0      | A |
| 11 | G671f20S35     | 35381005 | G | 0   | 0      | A |
| 11 | BICF2S23145330 | 35394549 | A | 0   | 0      | G |
| 11 | BICF2P707727   | 35398583 | 0 | 0   | 0      | A |
| 11 | BICF2S23136941 | 35428978 | G | 0   | 0      | A |
| 11 | G672f38S107    | 35453715 | A | 0   | 0      | G |
| 11 | BICF2S23430617 | 35484736 | G | 0   | 0      | A |
| 11 | BICF2P200637   | 35495439 | 0 | 0   | 0      | G |
| 11 | G673f47S112    | 35519119 | G | 0   | 0      | A |
| 11 | BICF2P1226574  | 35546785 | 0 | 0   | 0      | A |
| 11 | BICF2P1214963  | 35572339 | 0 | 0   | 0      | G |
| 11 | BICF2S23150328 | 35587763 | 0 | 0   | 0      | A |
| 11 | BICF2P736464   | 35595450 | A | 0.5 | 0.7857 | G |
| 11 | BICF2S22919345 | 35606033 | G | 0   | 0      | A |
| 11 | BICF2P1331669  | 35618541 | G | 0.5 | 0.7857 | A |
| 11 | BICF2S23150034 | 35647715 | G | 0   | 0      | A |
| 11 | BICF2P1273994  | 35672050 | G | 0.5 | 0.7857 | A |
| 11 | BICF2S23714676 | 35674225 | C | 0.5 | 0.7857 | G |
| 11 | BICF2P661574   | 35692648 | A | 0.5 | 0.8333 | C |
| 11 | BICF2S2375951  | 35706515 | A | 0.5 | 0.2143 | G |
| 11 | BICF2P267425   | 35708301 | A | 0.5 | 0.7857 | G |
| 11 | BICF2S23429593 | 35727614 | A | 0   | 0      | G |
| 11 | BICF2P551897   | 35736309 | A | 0.5 | 0.7857 | G |
| 11 | BICF2P974754   | 35742421 | G | 0.5 | 0.7857 | A |
| 11 | BICF2P751088   | 35761590 | G | 0.5 | 0.7857 | A |
| 11 | BICF2P1423876  | 35765370 | G | 0.5 | 0.7857 | A |
| 11 | BICF2P559015   | 35796050 | C | 0.5 | 0.7857 | G |
| 11 | BICF2P1169284  | 35810870 | A | 0.5 | 0.7857 | G |
| 11 | BICF2P511897   | 35829192 | A | 0.5 | 0.7857 | G |
| 11 | BICF2S2316045  | 35836142 | A | 0.5 | 0.7857 | G |
| 11 | BICF2P1104029  | 35845667 | G | 0.5 | 0.7857 | A |
| 11 | BICF2S23613918 | 35867357 | G | 0   | 0      | A |
| 11 | BICF2P674626   | 35875844 | G | 0.5 | 0.7857 | A |
| 11 | BICF2P1067726  | 35890234 | A | 0.5 | 0.8333 | G |
| 11 | BICF2P1067727  | 35890320 | G | 0.5 | 0.7857 | A |
| 11 | BICF2P1067730  | 35891601 | 0 | 0   | 0      | A |
| 11 | BICF2S24310803 | 35911874 | A | 0.5 | 0.7857 | G |
| 11 | BICF2S23331281 | 35918500 | A | 0.5 | 0.7857 | G |
| 11 | BICF2P959626   | 35927911 | A | 0.5 | 0.7857 | C |
| 11 | BICF2P1164801  | 35963288 | G | 0.5 | 0.8333 | A |

|    |                         |          |   |     |        |   |
|----|-------------------------|----------|---|-----|--------|---|
| 11 | BICF2P345169            | 35977355 | A | 0.5 | 0.2143 | G |
| 11 | BICF2P1162988           | 35994453 | G | 0.5 | 0.7857 | A |
| 11 | BICF2P700072            | 36006528 | C | 0.5 | 0.7857 | A |
| 11 | BICF2P995290            | 36030887 | G | 0.5 | 0.7857 | A |
| 11 | BICF2S23038947          | 36048630 | A | 0.5 | 0.7857 | G |
| 11 | BICF2P494620            | 36058670 | G | 0.5 | 0.7857 | A |
| 11 | BICF2P1453750           | 36065269 | G | 0.5 | 0.7857 | A |
| 11 | BICF2S23536724          | 36079284 | A | 0.5 | 0.7857 | G |
| 11 | BICF2P100162            | 36097340 | G | 0.5 | 0.7857 | A |
| 11 | BICF2S23646868          | 36120525 | T | 0   | 0      | A |
| 11 | BICF2S23355661          | 36134341 | A | 0.5 | 0.2143 | G |
| 11 | BICF2S23021448          | 36146790 | G | 0   | 0      | C |
| 11 | BICF2P696343            | 36162211 | G | 0.5 | 0.7857 | A |
| 11 | BICF2P535628            | 36176896 | A | 0.5 | 0.7857 | G |
| 11 | BICF2P138348            | 36180497 | A | 0.5 | 0.7857 | C |
| 11 | BICF2P443517            | 36201798 | C | 0.5 | 0.7857 | A |
| 11 | BICF2P525110            | 36208110 | 0 | 0   | 0      | A |
| 11 | BICF2P990488            | 36221976 | A | 0.5 | 0.7857 | G |
| 11 | BICF2P681606            | 36226618 | G | 0.5 | 0.7857 | A |
| 11 | BICF2P98398             | 36242601 | 0 | 0   | 0      | A |
| 11 | BICF2P1046131           | 36255483 | T | 0.5 | 0.2143 | A |
| 11 | BICF2S23259230          | 36263235 | G | 0.5 | 0.2143 | A |
| 11 | BICF2S22918785          | 36282384 | C | 0   | 0      | A |
| 11 | BICF2S23159756          | 36283882 | G | 0.5 | 0.7857 | A |
| 11 | BICF2S22963829          | 36305350 | G | 0.5 | 0.7857 | A |
| 11 | BICF2S2379845           | 36321967 | A | 0.5 | 0.2143 | G |
| 11 | BICF2P93273             | 36328834 | A | 0.5 | 0.7857 | C |
| 11 | BICF2P1398773           | 36343543 | A | 0.5 | 0.2143 | G |
| 11 | BICF2P1101477           | 36353483 | G | 0.5 | 0.7857 | A |
| 11 | BICF2P203206            | 36364803 | A | 0.5 | 0.2143 | G |
| 11 | BICF2P1132820           | 36374631 | A | 0.5 | 0.7857 | C |
| 11 | BICF2S23122525          | 36377013 | C | 0   | 0      | A |
| 11 | BICF2P1384693           | 36393162 | G | 0.5 | 0.2143 | A |
| 11 | BICF2P1020121           | 36405430 | G | 0.5 | 0.7857 | A |
| 11 | BICF2P610779            | 36409478 | G | 0.5 | 0.2143 | A |
| 11 | BICF2P824858            | 36422457 | A | 0.5 | 0.2143 | G |
| 11 | BICF2P7507              | 36436733 | A | 0.5 | 0.2143 | G |
| 11 | BICF2P1428719           | 36443607 | G | 0.5 | 0.2143 | A |
| 11 | BICF2P1191640           | 36458248 | C | 0.5 | 0.2143 | G |
| 11 | BICF2P264106            | 36488874 | A | 0.5 | 0.2143 | T |
| 11 | BICF2S23762564          | 36490075 | A | 0.5 | 0.2143 | C |
| 11 | TIGRP2P148931_rs8906800 | 36506230 | 0 | 0   | 0      | A |
| 11 | BICF2P704790            | 36513689 | G | 0.5 | 0.2143 | A |
| 11 | BICF2P239482            | 36531129 | C | 0.5 | 0.2143 | A |
| 11 | BICF2P547497            | 36552467 | G | 0   | 0      | A |
| 11 | BICF2P544850            | 36558106 | A | 0   | 0      | G |
| 11 | BICF2P680396            | 36561357 | A | 0   | 0      | G |

|    |                         |          |   |     |        |   |
|----|-------------------------|----------|---|-----|--------|---|
| 11 | BICF2S22954856          | 36581190 | A | 0.5 | 0.7857 | G |
| 11 | BICF2P73334             | 36585418 | A | 0   | 0      | G |
| 11 | BICF2P1292918           | 36603811 | A | 0   | 0      | G |
| 11 | BICF2S23759444          | 36605628 | A | 0   | 0      | G |
| 11 | BICF2P1095405           | 36628500 | G | 0.5 | 0.7857 | A |
| 11 | BICF2P279945            | 36639200 | 0 | 0   | 0      | A |
| 11 | BICF2P1187341           | 36659974 | A | 0   | 0      | G |
| 11 | BICF2S22940466          | 36669815 | A | 0.5 | 0.7857 | C |
| 11 | BICF2P689546            | 36677461 | A | 0   | 0      | C |
| 11 | BICF2S23238303          | 36680635 | G | 0.5 | 0.7857 | A |
| 11 | BICF2P910034            | 36690738 | A | 0.5 | 0.7857 | G |
| 11 | TIGRP2P148936_rs8651078 | 36705761 | 0 | 0   | 0      | G |
| 11 | BICF2P143775            | 36714627 | 0 | 0   | 0      | A |
| 11 | BICF2P534915            | 36728560 | A | 0   | 0      | G |
| 11 | BICF2P564405            | 36733449 | A | 0   | 0      | C |
| 11 | BICF2P101336            | 36752218 | G | 0.5 | 0.2143 | A |
| 11 | BICF2P1308315           | 36759212 | G | 0   | 0      | A |
| 11 | BICF2P565838            | 36777218 | G | 0   | 0      | A |
| 11 | BICF2P1412181           | 36805090 | G | 0.5 | 0.8333 | A |
| 11 | BICF2S23414228          | 36822456 | G | 0   | 0      | A |
| 11 | BICF2P1379001           | 36829058 | A | 0   | 0      | C |
| 11 | BICF2P548212            | 36842545 | A | 0   | 0      | G |
| 11 | TIGRP2P148939_rs8945530 | 36846559 | 0 | 0   | 0      | G |
| 11 | BICF2P755580            | 36861293 | G | 0   | 0      | A |
| 11 | BICF2P1415909           | 36872713 | C | 0   | 0      | A |
| 11 | BICF2S23728995          | 36885429 | A | 0   | 0      | G |
| 11 | BICF2P105000            | 36893151 | 0 | 0   | 0      | A |
| 11 | BICF2P466957            | 36904484 | G | 0   | 0      | A |
| 11 | TIGRP2P148940_rs8892537 | 36916179 | 0 | 0   | 0      | A |
| 11 | BICF2S23516471          | 36928683 | A | 0.5 | 0.9    | G |
| 11 | BICF2P271217            | 36939360 | G | 0.5 | 0.2143 | A |
| 11 | BICF2P915368            | 36951544 | G | 1   | 1      | A |
| 11 | BICF2P97206             | 36961469 | A | 0.5 | 0.2143 | C |
| 11 | BICF2P570440            | 36975665 | C | 0   | 0      | A |
| 11 | BICF2P349347            | 36992006 | G | 0.5 | 0.2143 | A |
| 11 | BICF2P349348            | 36992186 | T | 0   | 0      | A |
| 11 | BICF2S23511333          | 36996546 | A | 0   | 0      | G |
| 11 | BICF2P573986            | 37017872 | C | 0   | 0      | G |
| 11 | BICF2S23054942          | 37021172 | A | 0   | 0      | G |
| 11 | BICF2P1093441           | 37027914 | A | 0   | 0      | G |
| 11 | BICF2P1034521           | 37037147 | A | 0   | 0      | G |
| 11 | BICF2S23519002          | 37046634 | G | 0   | 0      | A |
| 11 | BICF2S23016739          | 37053548 | A | 0   | 0      | G |
| 11 | BICF2P711110            | 37066058 | C | 0   | 0      | A |
| 11 | BICF2P1381716           | 37081693 | C | 0   | 0      | A |
| 11 | BICF2P1381720           | 37083899 | A | 0   | 0      | G |
| 11 | BICF2P820118            | 37088306 | A | 0   | 0      | G |

|    |                         |          |   |     |        |   |
|----|-------------------------|----------|---|-----|--------|---|
| 11 | BICF2P1411700           | 37115610 | G | 0.5 | 0.2143 | A |
| 11 | BICF2S23346186          | 37128421 | A | 0   | 0      | G |
| 11 | BICF2P355130            | 37138903 | A | 0.5 | 0.2143 | G |
| 11 | BICF2P1351518           | 37177482 | A | 0   | 0      | G |
| 11 | BICF2P1164912           | 37180164 | A | 0   | 0      | G |
| 11 | BICF2P1077362           | 37194625 | G | 0.5 | 0.2143 | A |
| 11 | BICF2P1109847           | 37211405 | G | 0   | 0      | A |
| 11 | BICF2P781952            | 37225492 | 0 | 0   | 0      | G |
| 11 | BICF2P1400709           | 37230231 | A | 0   | 0      | G |
| 11 | BICF2P402538            | 37247527 | G | 0   | 0      | A |
| 11 | BICF2S23223694          | 37252333 | G | 0   | 0      | A |
| 11 | BICF2P485701            | 37267238 | A | 0   | 0      | T |
| 11 | BICF2P665711            | 37271998 | A | 0.5 | 0.5    | C |
| 11 | BICF2S23752439          | 37289973 | C | 0   | 0      | A |
| 11 | BICF2S23050380          | 37295576 | C | 0.5 | 0.5    | A |
| 11 | BICF2P802836            | 37309297 | A | 0   | 0      | G |
| 11 | BICF2P757119            | 37318349 | A | 0   | 0      | G |
| 11 | BICF2P1000671           | 37333212 | A | 0   | 0.2857 | G |
| 11 | TIGRP2P148945_rs8823371 | 37340743 | 0 | 0   | 0      | A |
| 11 | BICF2P798208            | 37341657 | T | 0   | 0      | A |
| 11 | BICF2P407518            | 37355229 | A | 0   | 0      | G |
| 11 | BICF2P102071            | 37368439 | G | 0.5 | 0.2143 | A |
| 11 | BICF2P135361            | 37375948 | A | 0.5 | 0.5    | G |
| 11 | BICF2P1014651           | 37394998 | A | 0   | 0      | G |
| 11 | BICF2P1107075           | 37406024 | A | 0.5 | 0.7857 | G |
| 11 | BICF2P1099081           | 37432667 | C | 0   | 0      | A |
| 11 | BICF2S2358332           | 37452062 | A | 0.5 | 0.2143 | G |
| 11 | BICF2P7710              | 37465834 | 0 | 0   | 0      | A |
| 11 | BICF2S23020838          | 37477227 | A | 0.5 | 0.2143 | C |
| 11 | BICF2P302698            | 37483772 | T | 0   | 0.2857 | A |
| 11 | BICF2P1045771           | 37491835 | G | 0   | 0.2857 | A |
| 11 | BICF2P218562            | 37511188 | G | 0   | 0.2857 | A |
| 11 | BICF2P277661            | 37523322 | A | 0   | 0.2857 | G |
| 11 | BICF2S2355733           | 37545779 | G | 0   | 0      | A |
| 11 | BICF2P932787            | 37549480 | A | 0.5 | 0.5    | C |
| 11 | BICF2P808894            | 37566219 | C | 0   | 0      | A |
| 11 | BICF2P834176            | 37577762 | A | 0   | 0      | G |
| 11 | BICF2P1027338           | 37585065 | A | 0.5 | 0.7857 | G |
| 11 | BICF2S23025025          | 37595375 | G | 0   | 0      | A |
| 11 | BICF2S23218151          | 37612611 | 0 | 0   | 0      | A |
| 11 | BICF2P827048            | 37617451 | G | 0   | 0      | A |
| 11 | BICF2P338927            | 37639413 | A | 0   | 0      | G |
| 11 | BICF2P4243              | 37645975 | 0 | 0   | 0      | T |
| 11 | BICF2P662451            | 37658392 | A | 0   | 0      | G |
| 11 | BICF2P643317            | 37664170 | G | 1   | 1      | A |
| 11 | BICF2P399138            | 37685179 | 0 | 0   | 0      | G |
| 11 | BICF2S23452792          | 37706390 | A | 0   | 0      | G |



|    |                |          |   |     |        |   |
|----|----------------|----------|---|-----|--------|---|
| 11 | BICF2P1105732  | 37718733 | C | 0   | 0      | A |
| 11 | BICF2P1004779  | 37721858 | 0 | 0   | 0      | C |
| 11 | BICF2P279702   | 37741405 | G | 0   | 0      | A |
| 11 | BICF2P1400326  | 37750909 | G | 0   | 0      | A |
| 11 | BICF2P429542   | 37771538 | G | 0.5 | 0.2143 | A |
| 11 | BICF2S23010069 | 37784531 | G | 0.5 | 0.5    | A |
| 11 | BICF2P380106   | 37790351 | C | 0   | 0      | G |
| 11 | BICF2P132685   | 37802625 | C | 0.5 | 0.2143 | A |
| 11 | BICF2P1470253  | 37814647 | A | 0   | 0.2857 | T |
| 11 | BICF2P1347592  | 37830178 | G | 0   | 0.25   | A |
| 11 | BICF2P746621   | 37840524 | 0 | 0   | 0      | G |
| 11 | BICF2P95013    | 37850797 | A | 0   | 0.2857 | G |
| 11 | BICF2P380973   | 37858084 | A | 0   | 0.2857 | C |
| 11 | BICF2P1108798  | 37869446 | G | 0   | 0      | A |
| 11 | BICF2P1127843  | 37881087 | G | 0   | 0      | A |
| 11 | BICF2P525927   | 37909655 | A | 0   | 0      | C |
| 11 | BICF2P1188474  | 37920746 | A | 0   | 0      | G |
| 11 | BICF2P955933   | 37934980 | G | 0   | 0      | A |
| 11 | BICF2P914677   | 37943800 | G | 0   | 0      | A |
| 11 | BICF2P981804   | 37951325 | G | 0   | 0      | A |
| 11 | BICF2P429725   | 37962058 | G | 0.5 | 0.2143 | A |
| 11 | BICF2P1141531  | 37973070 | A | 0.5 | 0.7857 | G |
| 11 | BICF2P809203   | 38005674 | C | 0.5 | 0.2143 | A |
| 11 | BICF2P1211478  | 38007750 | A | 0.5 | 0.2143 | G |
| 11 | BICF2P403296   | 38023239 | G | 0   | 0      | C |
| 11 | BICF2P734228   | 38034327 | A | 0   | 0      | G |
| 11 | BICF2S23413064 | 38052634 | A | 0.5 | 0.2143 | G |
| 11 | BICF2P1429576  | 38062295 | 0 | 0   | 0      | A |
| 11 | BICF2P1109069  | 38072199 | G | 0.5 | 0.2143 | A |
| 11 | BICF2S23033585 | 38085049 | G | 0   | 0      | A |
| 11 | BICF2S23331601 | 38098577 | A | 0.5 | 0.2143 | G |
| 11 | BICF2S23412162 | 38099570 | G | 0.5 | 0.7857 | A |
| 11 | BICF2S23148013 | 38115443 | G | 0   | 0      | A |
| 11 | BICF2S23454861 | 38133150 | G | 0.5 | 0.2143 | A |
| 11 | BICF2S23056896 | 38134082 | G | 0.5 | 0.2143 | A |
| 11 | BICF2S2343203  | 38151947 | T | 0.5 | 0.1667 | A |
| 11 | BICF2P1205745  | 38167571 | G | 0   | 0      | C |
| 11 | BICF2P1031081  | 38174465 | C | 0   | 0      | G |
| 11 | BICF2S22916123 | 38186960 | A | 0   | 0      | G |
| 11 | BICF2P150139   | 38193521 | A | 0   | 0      | G |
| 11 | BICF2P696062   | 38205431 | G | 0   | 0      | A |
| 11 | BICF2S2341738  | 38217259 | G | 0.5 | 0.7857 | A |
| 11 | BICF2P990064   | 38229235 | G | 0.5 | 0.7857 | A |
| 11 | BICF2P706228   | 38253054 | A | 0.5 | 0.2143 | G |
| 11 | BICF2P706227   | 38253092 | A | 0.5 | 0.2143 | G |
| 11 | BICF2S23756520 | 38262588 | G | 0   | 0      | A |
| 11 | BICF2P508643   | 38275399 | A | 0.5 | 0.2143 | G |

|    |                         |          |   |     |        |   |
|----|-------------------------|----------|---|-----|--------|---|
| 11 | BICF2P87462             | 38286056 | A | 0.5 | 0.2143 | C |
| 11 | BICF2P1178787           | 38297056 | A | 0.5 | 0.2143 | G |
| 11 | BICF2P1248372           | 38314538 | A | 0.5 | 0.2143 | C |
| 11 | BICF2P210015            | 38321112 | A | 0.5 | 0.1667 | G |
| 11 | BICF2S22923332          | 38334763 | G | 0   | 0      | A |
| 11 | BICF2P742919            | 38343008 | 0 | 0   | 0      | A |
| 11 | TIGRP2P148956_rs8948919 | 38363212 | 0 | 0   | 0      | A |
| 11 | BICF2S237620            | 38367465 | A | 0   | 0      | G |
| 11 | G674f58S213             | 38406442 | A | 0   | 0      | G |
| 11 | BICF2S22913009          | 38442534 | A | 0   | 0      | G |
| 11 | BICF2P690434            | 38452005 | A | 0.5 | 0.5    | G |
| 11 | BICF2P1134479           | 38457203 | G | 0.5 | 0.5    | A |
| 11 | BICF2S23160697          | 38470102 | C | 0   | 0      | A |
| 11 | TIGRP2P148959_rs8983706 | 38479993 | 0 | 0   | 0      | G |
| 11 | BICF2P522986            | 38499212 | C | 0.5 | 0.5    | A |
| 11 | BICF2P279938            | 38502177 | G | 0.5 | 0.5    | A |
| 11 | BICF2P181451            | 38523312 | G | 0.5 | 0.5    | A |
| 11 | BICF2P1332119           | 38536984 | G | 0.5 | 0.5    | A |
| 11 | BICF2P935694            | 38550019 | G | 1   | 1      | A |
| 11 | BICF2P1276408           | 38564800 | A | 1   | 1      | G |
| 11 | BICF2P518644            | 38576675 | A | 0.5 | 0.5    | C |
| 11 | BICF2P110721            | 38594237 | A | 0.5 | 0.5    | G |
| 11 | BICF2P1145788           | 38616119 | A | 0.5 | 0.5    | G |
| 11 | BICF2P449142            | 38619967 | C | 0.5 | 0.5    | A |
| 11 | TIGRP2P148964_rs8852418 | 38634833 | 0 | 0   | 0      | G |
| 11 | BICF2S23410270          | 38667551 | G | 0   | 0      | A |
| 11 | BICF2P1105439           | 38676856 | A | 0   | 0.2857 | G |
| 11 | BICF2P293051            | 38686888 | G | 1   | 0.6429 | A |
| 11 | BICF2P317662            | 38717717 | G | NA  | NA     | A |
| 11 | BICF2P939275            | 38727000 | A | 1   | 0.7143 | G |
| 11 | BICF2P377511            | 38742358 | 0 | 0   | 0      | G |
| 11 | BICF2P120637            | 38753223 | A | 0   | 0      | T |
| 11 | BICF2P30576             | 38765549 | A | 0.5 | 0.2143 | G |
| 11 | BICF2P1284061           | 38774811 | G | 0.5 | 0.5    | A |
| 11 | BICF2P451731            | 38791349 | 0 | 0   | 0      | A |
| 11 | BICF2P989422            | 38830067 | G | 1   | 0.7143 | A |
| 11 | BICF2P1003196           | 38850161 | A | 1   | 0.7143 | G |
| 11 | BICF2P288262            | 38859158 | G | 0   | 0      | A |
| 11 | BICF2S22918197          | 38880554 | A | 0   | 0      | G |
| 11 | BICF2P1261686           | 38890409 | C | 0   | 0      | A |
| 11 | BICF2P226528            | 38893777 | A | 0   | 0      | G |
| 11 | BICF2S23416726          | 38936961 | G | 0   | 0      | A |
| 11 | BICF2S23436988          | 38942405 | A | 0   | 0      | G |
| 11 | BICF2P644413            | 38961710 | A | 0   | 0      | T |
| 11 | BICF2P855190            | 38964264 | A | 0   | 0      | G |
| 11 | BICF2P212417            | 38979412 | G | 0   | 0      | A |
| 11 | BICF2P779676            | 38991608 | C | 0   | 0      | A |

|    |                         |          |   |     |        |   |
|----|-------------------------|----------|---|-----|--------|---|
| 11 | BICF2S23051580          | 39004359 | A | 0   | 0      | G |
| 11 | BICF2S22960865          | 39010430 | G | 0   | 0      | A |
| 11 | BICF2P1246533           | 39026880 | A | 0   | 0      | G |
| 11 | BICF2P1027826           | 39036169 | A | 0   | 0      | C |
| 11 | BICF2P1035311           | 39051228 | A | 0   | 0      | G |
| 11 | BICF2P898353            | 39060009 | G | 0   | 0      | A |
| 11 | BICF2P137763            | 39072460 | A | 0   | 0      | C |
| 11 | BICF2P982187            | 39091985 | A | 0   | 0      | G |
| 11 | BICF2P853078            | 39101990 | A | 0   | 0      | G |
| 11 | BICF2P188020            | 39114436 | 0 | 0   | 0      | C |
| 11 | BICF2P785569            | 39126445 | G | 0.5 | 0.2143 | A |
| 11 | BICF2P445200            | 39154979 | 0 | 0   | 0      | A |
| 11 | BICF2P901547            | 39176896 | G | 0   | 0      | A |
| 11 | BICF2P677302            | 39183236 | C | 0   | 0      | A |
| 11 | BICF2P1080107           | 39195910 | C | 0   | 0      | A |
| 11 | BICF2P687903            | 39208719 | A | 0   | 0      | G |
| 11 | BICF2P324220            | 39226378 | A | 0   | 0      | C |
| 11 | BICF2P878475            | 39227560 | A | 0   | 0      | G |
| 11 | BICF2P1415516           | 39239315 | A | 0   | 0      | G |
| 11 | BICF2P1038522           | 39253715 | A | 0   | 0      | G |
| 11 | BICF2P593315            | 39264044 | A | 0   | 0      | G |
| 11 | BICF2P121911            | 39277520 | A | 0   | 0      | G |
| 11 | BICF2P749888            | 39286761 | A | 0   | 0      | G |
| 11 | BICF2P1413906           | 39293909 | A | 0   | 0      | G |
| 11 | BICF2S23329688          | 39298225 | 0 | 0   | 0      | G |
| 11 | BICF2P345952            | 39310116 | G | 0.5 | 0.7857 | A |
| 11 | BICF2P412404            | 39325482 | G | 0   | 0      | A |
| 11 | BICF2S2297995           | 39337125 | A | 0   | 0      | G |
| 11 | BICF2P267148            | 39347230 | A | 0   | 0      | C |
| 11 | BICF2S23632377          | 39360423 | A | 1   | 0.7143 | C |
| 11 | BICF2P1093279           | 39375957 | A | 0   | 0.2857 | G |
| 11 | BICF2S2326699           | 39408512 | 0 | 0   | 0      | G |
| 11 | BICF2P1258076           | 39418367 | G | 0.5 | 0.5    | A |
| 11 | BICF2P719913            | 39426776 | A | 0.5 | 0.5    | G |
| 11 | BICF2P459103            | 39454083 | G | 0   | 0      | A |
| 11 | BICF2S23036705          | 39457724 | A | 0   | 0      | G |
| 11 | BICF2S23032773          | 39470819 | A | 0   | 0.2857 | G |
| 11 | BICF2P1255810           | 39479501 | A | 0.5 | 0.5    | G |
| 11 | BICF2P912292            | 39497006 | A | 0   | 0.2857 | G |
| 11 | BICF2P311377            | 39510069 | A | 0.5 | 0.2143 | G |
| 11 | BICF2S23440424          | 39523057 | G | 0   | 0.25   | A |
| 11 | BICF2S23511120          | 39531811 | A | 0.5 | 0.5    | T |
| 11 | TIGRP2P148976_rs9058191 | 39540307 | 0 | 0   | 0      | A |
| 11 | TIGRP2P148977_rs8677243 | 39556313 | 0 | 0   | 0      | A |
| 11 | BICF2P324041            | 39563585 | 0 | 0   | 0      | G |
| 11 | BICF2P1415080           | 39575221 | 0 | 0   | 0      | A |
| 11 | BICF2P338484            | 39607069 | A | 0   | 0      | G |

|    |                         |          |   |     |        |   |
|----|-------------------------|----------|---|-----|--------|---|
| 11 | BICF2P1432449           | 39623485 | A | 0   | 0      | C |
| 11 | G675f57S208             | 39646734 | 0 | 0   | 0      | A |
| 11 | BICF2S23258982          | 39668643 | G | 0   | 0.2857 | A |
| 11 | BICF2S23758223          | 39680075 | A | 0   | 0      | G |
| 11 | BICF2S2343886           | 39690160 | G | 0   | 0      | A |
| 11 | TIGRP2P148981_rs9211160 | 39705228 | 0 | 0   | 0      | A |
| 11 | BICF2P705964            | 39714648 | A | 0   | 0      | T |
| 11 | BICF2P780735            | 39721593 | 0 | 0   | 0      | A |
| 11 | BICF2P422571            | 39739403 | 0 | 0   | 0      | C |
| 11 | BICF2P215123            | 39745962 | A | 0   | 0      | G |
| 11 | TIGRP2P148982_rs8985694 | 39764953 | 0 | 0   | 0      | G |
| 11 | BICF2P1268238           | 39786703 | G | 0   | 0      | A |
| 11 | BICF2P825657            | 39795123 | G | 0   | 0      | A |
| 11 | BICF2P796490            | 39803170 | A | 0   | 0      | C |
| 11 | BICF2P482675            | 39819919 | A | 0   | 0      | G |
| 11 | BICF2P1282932           | 39828031 | A | 0   | 0      | G |
| 11 | BICF2P708415            | 39839969 | A | 0.5 | 0.5    | G |
| 11 | BICF2P306388            | 39856907 | A | 0.5 | 0.5    | G |
| 11 | TIGRP2P148984_rs8717210 | 39861600 | 0 | 0   | 0      | C |
| 11 | BICF2P1197260           | 39890362 | A | 0.5 | 0.5    | G |
| 11 | BICF2P1022226           | 39899773 | G | 0.5 | 0.5    | A |
| 11 | BICF2P43664             | 39908709 | G | 0.5 | 0.5    | A |
| 11 | BICF2P117270            | 39922635 | 0 | 0   | 0      | A |
| 11 | BICF2P517629            | 39930544 | A | 0.5 | 0.7857 | G |
| 11 | BICF2P802184            | 39973384 | A | 0.5 | 0.5    | G |
| 11 | BICF2P579873            | 39977543 | C | 0.5 | 0.5    | A |
| 11 | BICF2P568118            | 39992720 | A | 1   | 0.7143 | G |
| 11 | BICF2P98575             | 40004597 | A | 1   | 0.7143 | G |
| 11 | BICF2P448274            | 40011315 | A | 1   | 0.7143 | G |
| 11 | BICF2P1498580           | 40037533 | G | 0   | 0      | A |
| 11 | BICF2P618197            | 40050550 | G | 0   | 0      | A |
| 11 | BICF2P915487            | 40061429 | G | 0   | 0      | C |
| 11 | BICF2S23247915          | 40067106 | A | 1   | 0.7143 | G |
| 11 | BICF2S23623205          | 40078080 | A | 0.5 | 0.5    | G |
| 11 | TIGRP2P148987_rs9179293 | 40091793 | 0 | 0   | 0      | G |
| 11 | BICF2P415178            | 40129145 | A | 0.5 | 0.5    | G |
| 11 | BICF2P294458            | 40150323 | 0 | 0   | 0      | G |
| 11 | BICF2P508545            | 40162561 | 0 | 0   | 0      | A |
| 11 | G676f29S119             | 40194115 | 0 | 0   | 0      | C |
| 11 | BICF2S23617071          | 40211491 | 0 | 0   | 0      | A |
| 11 | BICF2S23763376          | 40257619 | G | 0.5 | 0.5    | A |
| 11 | BICF2P339376            | 40286874 | 0 | 0   | 0      | G |
| 11 | BICF2P566472            | 40303294 | 0 | 0   | 0      | A |
| 11 | G677f18S269             | 40328179 | G | 0   | 0.25   | A |
| 11 | G677f23S268             | 40338861 | G | 0.5 | 0.5    | A |
| 11 | BICF2P216741            | 40376398 | 0 | 0   | 0      | A |
| 11 | TIGRP2P148992_rs8697339 | 40382938 | 0 | 0   | 0      | C |

|    |                         |          |   |     |        |   |
|----|-------------------------|----------|---|-----|--------|---|
| 11 | BICF2S23215858          | 40404810 | A | 0.5 | 0.7857 | G |
| 11 | BICF2S23045596          | 40431947 | C | 0   | 0.2857 | A |
| 11 | BICF2P980632            | 40442512 | 0 | 0   | 0      | A |
| 11 | G678f21S211             | 40464493 | 0 | 0   | 0      | A |
| 11 | BICF2S23149944          | 40484049 | G | 0.5 | 0.7857 | A |
| 11 | BICF2S23424821          | 40494704 | A | 0.5 | 0.5    | G |
| 11 | BICF2S23547823          | 40514142 | G | 0.5 | 0.5    | A |
| 11 | BICF2S23027546          | 40515300 | A | 0.5 | 0.5    | G |
| 11 | BICF2S23737631          | 40559234 | G | 1   | 0.7143 | A |
| 11 | BICF2S23624846          | 40568863 | G | 1   | 0.7143 | A |
| 11 | BICF2S23217051          | 40579875 | G | 1   | 0.7143 | A |
| 11 | BICF2S23454417          | 40584702 | 0 | 0   | 0      | G |
| 11 | BICF2P688747            | 40602357 | 0 | 0   | 0      | T |
| 11 | BICF2P792140            | 40613017 | A | 0   | 0      | C |
| 11 | BICF2P22260             | 40632694 | T | 0.5 | 0.7857 | A |
| 11 | G679f43S271             | 40658792 | 0 | 0   | 0      | C |
| 11 | G680f42S273             | 40717567 | G | 0   | 0      | A |
| 11 | BICF2P551558            | 40742592 | G | 0.5 | 0.5    | A |
| 11 | BICF2S23912554          | 40752480 | 0 | 0   | 0      | G |
| 11 | BICF2S23115728          | 40758228 | 0 | 0   | 0      | A |
| 11 | BICF2P760133            | 40788965 | G | 0   | 0      | A |
| 11 | BICF2P858820            | 40794422 | G | 0.5 | 0.2143 | A |
| 11 | BICF2P377619            | 40819312 | 0 | 0   | 0      | A |
| 11 | BICF2P969229            | 40831894 | 0 | 0   | 0      | C |
| 11 | BICF2P171609            | 40843504 | 0 | 0   | 0      | C |
| 11 | BICF2P504777            | 40853616 | A | 0   | 0      | G |
| 11 | BICF2P1054989           | 40876201 | A | 0   | 0      | G |
| 11 | BICF2P211495            | 40884075 | 0 | 0   | 0      | A |
| 11 | BICF2P659484            | 40895414 | 0 | 0   | 0      | G |
| 11 | BICF2P19563             | 40908461 | A | 0   | 0      | C |
| 11 | BICF2P1171006           | 40967934 | 0 | 0   | 0      | G |
| 11 | BICF2P387118            | 40976548 | 0 | 0   | 0      | A |
| 11 | BICF2P821297            | 40993712 | 0 | 0   | 0      | A |
| 11 | BICF2P781636            | 41018756 | 0 | 0   | 0      | A |
| 11 | BICF2P190343            | 41030256 | 0 | 0   | 0      | G |
| 11 | BICF2P583349            | 41040891 | 0 | 0   | 0      | A |
| 11 | TIGRP2P149000_rs8979945 | 41058942 | 0 | 0   | 0      | C |
| 11 | BICF2P388623            | 41075926 | 0 | 0   | 0      | C |
| 11 | BICF2P119617            | 41107383 | A | 0   | 0      | G |
| 11 | BICF2P1192319           | 41115369 | A | 0.5 | 0.1667 | G |
| 11 | BICF2S23139506          | 41125075 | A | 0.5 | 0.2143 | G |
| 11 | BICF2P117244            | 41137627 | G | 0.5 | 0.2143 | A |
| 11 | BICF2S23018735          | 41156571 | A | 0.5 | 0.5    | G |
| 11 | BICF2P574934            | 41160280 | A | 0.5 | 0.5    | G |
| 11 | BICF2P634142            | 41167262 | A | 0.5 | 0.5    | T |
| 11 | BICF2P1180552           | 41175539 | G | 0   | 0.5714 | A |
| 11 | BICF2P449512            | 41192156 | G | 0.5 | 0.5    | A |

|    |                |          |   |     |        |   |
|----|----------------|----------|---|-----|--------|---|
| 11 | BICF2P592259   | 41195424 | G | 0.5 | 0.5    | A |
| 11 | BICF2S22962694 | 41210783 | A | 0.5 | 0.2143 | G |
| 11 | BICF2P615149   | 41234336 | C | 0.5 | 0.2143 | A |
| 11 | BICF2P151855   | 41244556 | G | 0   | 0.5714 | A |
| 11 | BICF2P37053    | 41256421 | A | 1   | 0.4286 | G |
| 11 | BICF2P493036   | 41267274 | A | 1   | 0.7143 | G |
| 11 | BICF2P783576   | 41277060 | G | 0.5 | 0.2143 | A |
| 11 | BICF2P253325   | 41291692 | A | 0.5 | 0.2143 | G |
| 11 | BICF2P753682   | 41302166 | C | 0.5 | 0.2143 | A |
| 11 | BICF2P876598   | 41311497 | G | 0.5 | 0.2143 | A |
| 11 | BICF2P634956   | 41322535 | 0 | 0   | 0      | A |
| 11 | BICF2P417574   | 41336945 | A | 0.5 | 0.2143 | G |
| 11 | BICF2P793030   | 41358412 | A | 1   | 1      | G |
| 11 | BICF2P676056   | 41359032 | A | 1   | 0.7143 | G |
| 11 | BICF2P332330   | 41367058 | A | 0   | 0      | G |
| 11 | BICF2S24511149 | 41383617 | G | 0   | 0      | A |
| 11 | BICF2P965533   | 41407884 | 0 | 0   | 0      | G |
| 11 | BICF2P1374981  | 41417853 | G | 0   | 0      | A |
| 11 | BICF2P1078565  | 41429543 | 0 | 0   | 0      | A |
| 11 | BICF2P501043   | 41443725 | A | 1   | 0.7143 | G |
| 11 | BICF2P224420   | 41451682 | G | 1   | 1      | A |
| 11 | BICF2P1245581  | 41459716 | G | 1   | 1      | A |
| 11 | BICF2P734629   | 41471051 | A | 0.5 | 0.5    | G |
| 11 | BICF2P724946   | 41488843 | A | 1   | 0.7143 | G |
| 11 | BICF2P1068706  | 41497418 | A | 1   | 0.7143 | C |
| 11 | BICF2S22931678 | 41509953 | A | 1   | 0.7143 | G |
| 11 | BICF2P1288166  | 41519641 | G | 1   | 0.7143 | A |
| 11 | BICF2P1241249  | 41529323 | A | 0   | 0.2857 | G |
| 11 | BICF2P292734   | 41543568 | A | 0   | 0.2857 | G |
| 11 | BICF2P803662   | 41551984 | A | 0   | 0      | G |
| 11 | BICF2P707095   | 41565944 | 0 | 0   | 0      | A |
| 11 | BICF2S23742995 | 41576487 | G | 0.5 | 0.5    | A |
| 11 | BICF2P255308   | 41590702 | G | 0   | 0      | A |
| 11 | BICF2P857492   | 41596363 | A | 0   | 0.2857 | G |
| 11 | BICF2S23428769 | 41612291 | A | 0   | 0.2857 | G |
| 11 | BICF2P890783   | 41625398 | A | 0   | 0.2857 | G |
| 11 | BICF2P798316   | 41637663 | A | 0   | 0.2857 | G |
| 11 | BICF2P706423   | 41652199 | C | 0.5 | 0.2143 | A |
| 11 | BICF2P1296622  | 41655328 | C | 0   | 0      | G |
| 11 | BICF2P329450   | 41674500 | A | 0   | 0      | G |
| 11 | BICF2S23623027 | 41677998 | A | 0   | 0      | G |
| 11 | BICF2S23611257 | 41698184 | A | 0.5 | 0.5    | G |
| 11 | BICF2P712872   | 41702602 | G | 1   | 0.7143 | A |
| 11 | BICF2P569499   | 41706463 | C | 0.5 | 0.5    | A |
| 11 | BICF2P462376   | 41721248 | G | 0.5 | 0.2143 | A |
| 11 | BICF2P277323   | 41730117 | G | 0.5 | 0.5    | A |
| 11 | BICF2P86952    | 41740372 | G | 0.5 | 0.2143 | A |

|    |                         |          |   |     |        |   |
|----|-------------------------|----------|---|-----|--------|---|
| 11 | BICF2P737121            | 41753208 | G | 0.5 | 0.2143 | A |
| 11 | BICF2P1270783           | 41766562 | A | 0.5 | 0.2143 | G |
| 11 | BICF2P461051            | 41768769 | A | 0.5 | 0.2143 | G |
| 11 | BICF2P751419            | 41781244 | A | 0   | 0      | G |
| 11 | BICF2P703048            | 41791566 | A | 0.5 | 0.2143 | G |
| 11 | BICF2P978383            | 41815760 | G | 1   | 0.4286 | A |
| 11 | BICF2P260258            | 41830089 | A | 0   | 0      | G |
| 11 | BICF2P971774            | 41843962 | 0 | 0   | 0      | A |
| 11 | TIGRP2P149013_rs8968962 | 41852746 | 0 | 0   | 0      | G |
| 11 | BICF2P1020079           | 41864823 | A | 0.5 | 0.2143 | G |
| 11 | BICF2P152841            | 41877241 | C | 0   | 0      | G |
| 11 | BICF2P1194593           | 41884540 | C | 0   | 0.25   | A |
| 11 | BICF2P989114            | 41902363 | C | 0.5 | 0.2143 | A |
| 11 | BICF2P952704            | 41915820 | A | 0   | 0      | C |
| 11 | BICF2S23641563          | 41918391 | C | 1   | 0.3333 | A |
| 11 | BICF2S23752402          | 41942290 | A | 1   | 0.4286 | G |
| 11 | BICF2S23725001          | 42029569 | G | 0   | 0.2857 | A |
| 11 | G682f16S254             | 42101273 | 0 | 0   | 0      | C |
| 11 | BICF2S23028535          | 42122334 | T | 0.5 | 0.2143 | A |
| 11 | BICF2P611886            | 42143138 | 0 | 0   | 0      | A |
| 11 | BICF2S2371542           | 42150324 | A | 0   | 0      | G |
| 11 | BICF2G630300759         | 42170065 | 0 | 0   | 0      | G |
| 11 | BICF2P690918            | 42184060 | C | 0.5 | 0.5    | A |
| 11 | BICF2P1307129           | 42194021 | C | 0   | 0      | G |
| 11 | BICF2P348554            | 42215732 | G | 0   | 0      | A |
| 11 | BICF2P626376            | 42227616 | G | 1   | 1      | A |
| 11 | BICF2P617862            | 42234608 | A | 0   | 0      | G |
| 11 | BICF2P281068            | 42241641 | A | 0   | 0      | G |
| 11 | BICF2P353831            | 42251680 | G | 0   | 0      | A |
| 11 | BICF2P71569             | 42270501 | G | 0   | 0      | A |
| 11 | BICF2P496690            | 42278575 | G | 0   | 0.2857 | A |
| 11 | BICF2P923218            | 42291635 | C | 0   | 0.2857 | A |
| 11 | BICF2P502254            | 42298690 | 0 | 0   | 0      | A |
| 11 | BICF2P32989             | 42315086 | G | 0   | 0      | A |
| 11 | BICF2S23216574          | 42329340 | A | 0   | 0      | C |
| 11 | BICF2P768117            | 42339654 | G | 0   | 0      | C |
| 11 | BICF2S23525492          | 42348500 | G | 0   | 0      | A |
| 11 | BICF2P595164            | 42386351 | 0 | 0   | 0      | C |
| 11 | BICF2P833220            | 42390728 | G | 1   | 1      | A |
| 11 | BICF2P107934            | 42409265 | A | 1   | 0.4286 | G |
| 11 | BICF2P135759            | 42418351 | A | 1   | 0.4286 | G |
| 11 | BICF2S23318165          | 42432976 | A | 1   | 0.7143 | C |
| 11 | BICF2P626005            | 42437268 | G | 1   | 0.7143 | A |
| 11 | BICF2S23027739          | 42437443 | A | 1   | 0.7143 | T |
| 11 | BICF2P940135            | 42451164 | C | 1   | 0.7143 | A |
| 11 | BICF2P1097410           | 42461433 | A | 0   | 0.2857 | G |
| 11 | BICF2S23213489          | 42467682 | G | 0   | 0      | A |

|    |                         |          |   |     |        |   |
|----|-------------------------|----------|---|-----|--------|---|
| 11 | BICF2S23431932          | 42475127 | G | 1   | 0.7143 | C |
| 11 | BICF2P77814             | 42488457 | G | 0   | 0      | A |
| 11 | BICF2P789480            | 42492830 | 0 | 0   | 0      | A |
| 11 | BICF2P1228508           | 42523226 | A | 0   | 0      | C |
| 11 | BICF2P885466            | 42536338 | A | 0   | 0.2857 | G |
| 11 | BICF2P1170042           | 42543751 | A | 0   | 0.2857 | G |
| 11 | TIGRP2P149030_rs8804497 | 42547191 | 0 | 0   | 0      | G |
| 11 | BICF2P1328205           | 42551620 | 0 | 0   | 0      | A |
| 11 | BICF2S2306848           | 42580732 | A | 0   | 0      | G |
| 11 | BICF2S23238383          | 42592504 | G | 0   | 0.2857 | A |
| 11 | BICF2P1417650           | 42599858 | A | 0   | 0.5714 | G |
| 11 | BICF2P627039            | 42611363 | G | 0   | 0      | A |
| 11 | BICF2P917915            | 42625996 | G | 0   | 0.5714 | A |
| 11 | BICF2S2351449           | 42635936 | C | 0.5 | 0.5    | A |
| 11 | BICF2P349840            | 42671695 | A | 0.5 | 0.8333 | G |
| 11 | BICF2P1248432           | 42689934 | A | 0.5 | 0.7857 | C |
| 11 | BICF2P228511            | 42700578 | C | 0.5 | 0.7857 | A |
| 11 | BICF2P1121573           | 42713103 | G | 0.5 | 0.2143 | A |
| 11 | BICF2P559217            | 42726364 | C | 0   | 0      | A |
| 11 | BICF2P1111059           | 42735613 | G | 0.5 | 0.2143 | A |
| 11 | BICF2P152209            | 42749008 | A | 0.5 | 0.5    | G |
| 11 | BICF2P299625            | 42760832 | A | 0.5 | 0.2143 | G |
| 11 | BICF2P401174            | 42770635 | C | 0.5 | 0.2143 | A |
| 11 | BICF2P634065            | 42782857 | G | 0.5 | 0.7857 | A |
| 11 | BICF2P367028            | 42797017 | C | 0.5 | 0.5    | A |
| 11 | BICF2P302332            | 42807434 | A | 0.5 | 0.5    | G |
| 11 | BICF2P1045986           | 42813471 | C | 0.5 | 0.5    | G |
| 11 | BICF2P491872            | 42816114 | G | 0.5 | 0.5    | A |
| 11 | BICF2P885481            | 42829703 | A | 0.5 | 0.5    | G |
| 11 | BICF2S2361531           | 42854583 | G | 0   | 0.2857 | A |
| 11 | BICF2S23033936          | 42865309 | G | 0   | 0      | A |
| 11 | BICF2P1209645           | 42873634 | A | 0   | 0      | G |
| 11 | BICF2P544059            | 42880163 | T | 0   | 0      | A |
| 11 | BICF2P1113751           | 42883529 | G | 0   | 0      | A |
| 11 | BICF2P1006475           | 42916888 | A | 0.5 | 0.7857 | G |
| 11 | BICF2S23434809          | 42927196 | C | 0.5 | 0.5    | A |
| 11 | BICF2P1311714           | 42931397 | A | 0.5 | 0.2143 | G |
| 11 | BICF2P402862            | 42944081 | A | 0   | 0.2857 | C |
| 11 | BICF2P1142163           | 42953569 | G | 0.5 | 0.1667 | A |
| 11 | BICF2P141970            | 42964235 | A | 1   | 0.4286 | G |
| 11 | BICF2P383167            | 42973349 | A | 1   | 0.7143 | C |
| 11 | BICF2P109877            | 42982553 | A | 1   | 0.7143 | C |
| 11 | BICF2P1139818           | 42991796 | A | 0.5 | 0.5    | G |
| 11 | BICF2P1001799           | 43008412 | C | 0   | 0      | A |
| 11 | BICF2P762746            | 43023084 | A | 0.5 | 0.5    | G |
| 11 | BICF2P927915            | 43034057 | G | 0.5 | 0.2143 | A |
| 11 | BICF2P1427537           | 43049365 | A | 0   | 0      | G |



|    |                |          |   |      |        |   |
|----|----------------|----------|---|------|--------|---|
| 11 | BICF2P775125   | 43059842 | C | 0    | 0      | G |
| 11 | BICF2P879936   | 43085147 | A | 0.5  | 0.2143 | G |
| 11 | BICF2P285010   | 43093962 | 0 | 0    | 0      | A |
| 11 | BICF2P972272   | 43107530 | A | 0.5  | 0.2143 | G |
| 11 | BICF2S23353659 | 43116707 | A | 0.5  | 0.5    | G |
| 11 | BICF2P463228   | 43126008 | G | 0.5  | 0.5    | A |
| 11 | BICF2S23125917 | 43138650 | C | 0    | 0.2857 | A |
| 11 | BICF2P1151956  | 43148591 | 0 | 0    | 0      | A |
| 11 | BICF2P488675   | 43163116 | A | 0.5  | 0.5    | C |
| 11 | BICF2P526897   | 43173486 | G | 0    | 0      | A |
| 11 | BICF2P1058563  | 43196225 | A | 0.5  | 0.5    | G |
| 11 | BICF2P266183   | 43209126 | G | 0    | 0      | A |
| 11 | BICF2S23521430 | 43223978 | G | 0    | 0      | C |
| 11 | BICF2S2315810  | 43234522 | A | 0    | 0      | G |
| 11 | BICF2P206788   | 43262247 | C | 0    | 0      | A |
| 11 | BICF2P889650   | 43267480 | G | 0    | 0      | A |
| 11 | BICF2P205101   | 43283612 | G | 0.5  | 0.2143 | A |
| 11 | BICF2P25846    | 43287519 | 0 | 0    | 0      | G |
| 11 | BICF2P865493   | 43320303 | 0 | 0    | 0      | A |
| 11 | BICF2P759476   | 43326235 | A | 0.5  | 0.2143 | G |
| 11 | BICF2P1246274  | 43341999 | 0 | 0    | 0      | G |
| 11 | BICF2S22942162 | 43351918 | 0 | 0    | 0      | C |
| 11 | BICF2S23326210 | 43358752 | G | 0.5  | 0.7857 | A |
| 11 | BICF2P6181     | 43367886 | 0 | 0    | 0      | A |
| 11 | BICF2S23318417 | 43395822 | A | 0    | 0      | G |
| 11 | BICF2S23323662 | 43419908 | C | 0    | 0      | A |
| 11 | BICF2S23252584 | 43442653 | A | 0.5  | 0.7857 | C |
| 11 | BICF2P608801   | 43449805 | 0 | 0    | 0      | G |
| 11 | BICF2S23535379 | 43476907 | 0 | 0    | 0      | G |
| 11 | BICF2P160112   | 43524948 | 0 | 0    | 0      | G |
| 11 | BICF2S2293731  | 43528571 | 0 | 0    | 0      | G |
| 11 | BICF2P668127   | 43544043 | A | 0.5  | 0.7857 | T |
| 11 | BICF2P547806   | 43551229 | A | 0.5  | 0.2143 | C |
| 11 | BICF2P1266331  | 43609449 | A | 0.5  | 0.2143 | G |
| 11 | BICF2P215214   | 43626880 | 0 | 0    | 0      | G |
| 11 | BICF2S23313347 | 43647669 | C | 0.5  | 0.7857 | A |
| 11 | BICF2P632777   | 43670362 | 0 | 0    | 0      | G |
| 11 | BICF2S23620222 | 43710504 | 0 | 0    | 0      | C |
| 11 | BICF2P695620   | 43728686 | C | 0.5  | 0.2143 | A |
| 11 | BICF2P637197   | 43807665 | A | 0    | 0      | G |
| 11 | BICF2P603602   | 43815333 | G | 0    | 0      | A |
| 11 | BICF2P915227   | 43827375 | G | 0    | 0      | A |
| 11 | BICF2P1226185  | 43854063 | A | 0    | 0      | G |
| 11 | BICF2P1051347  | 43862256 | C | 0    | 0      | G |
| 11 | BICF2P1404562  | 43888582 | G | 0.25 | 0      | A |
| 11 | BICF2P1363955  | 43899661 | A | 1    | 1      | G |
| 11 | BICF2P244647   | 43918928 | 0 | 0    | 0      | A |

|    |                |          |   |     |        |   |
|----|----------------|----------|---|-----|--------|---|
| 11 | BICF2P303156   | 43933047 | G | 0   | 0      | A |
| 11 | BICF2S23642349 | 43950585 | C | 0   | 0      | A |
| 11 | BICF2S23728110 | 43963941 | G | 0   | 0      | A |
| 11 | BICF2P700215   | 43967847 | A | 1   | 1      | G |
| 11 | BICF2P909399   | 43976267 | A | 1   | 1      | C |
| 11 | BICF2P241904   | 43994647 | G | 0   | 0      | A |
| 11 | BICF2P542767   | 43998544 | A | 1   | 1      | C |
| 11 | BICF2S2361823  | 44001369 | C | 0   | 0      | A |
| 11 | BICF2P449143   | 44010634 | A | 0   | 0      | G |
| 11 | BICF2P871058   | 44022289 | G | 0   | 0      | A |
| 11 | BICF2P379107   | 44033776 | A | 1   | 1      | G |
| 11 | BICF2P1215191  | 44047337 | T | 0   | 0      | A |
| 11 | BICF2P1393057  | 44067363 | A | 0   | 0      | T |
| 11 | BICF2P645624   | 44075438 | A | 0   | 0      | G |
| 11 | BICF2P851464   | 44090309 | A | 0   | 0      | G |
| 11 | BICF2P1042612  | 44097438 | A | 0   | 0      | T |
| 11 | BICF2S2396873  | 44123665 | G | 0   | 0      | A |
| 11 | BICF2P44510    | 44128911 | G | 0   | 0      | A |
| 11 | BICF2P432191   | 44142760 | G | 0   | 0      | A |
| 11 | BICF2P302625   | 44167160 | A | 0   | 0      | G |
| 11 | BICF2P283052   | 44177978 | A | 1   | 1      | G |
| 11 | BICF2S23134137 | 44191398 | A | 0   | 0      | G |
| 11 | BICF2P122855   | 44206776 | A | 0   | 0      | G |
| 11 | BICF2S23352137 | 44226544 | A | 0   | 0      | G |
| 11 | BICF2S23737391 | 44231128 | G | 0   | 0      | A |
| 11 | BICF2P595918   | 44246983 | G | 0   | 0      | A |
| 11 | BICF2P951175   | 44267162 | G | 0.5 | 0.7857 | A |
| 11 | BICF2P820577   | 44287242 | 0 | 0   | 0      | A |
| 11 | BICF2S2347185  | 44306872 | 0 | 0   | 0      | G |
| 11 | BICF2P469379   | 44312390 | 0 | 0   | 0      | G |
| 11 | BICF2P296145   | 44333849 | 0 | 0   | 0      | C |
| 11 | BICF2S2393232  | 44344664 | 0 | 0   | 0      | A |
| 11 | BICF2S2325952  | 44370985 | A | 0   | 0      | G |
| 11 | BICF2P19798    | 44389570 | 0 | 0   | 0      | A |
| 11 | BICF2P1214772  | 44392733 | 0 | 0   | 0      | G |
| 11 | BICF2P133066   | 44405676 | A | 0.5 | 0.7857 | C |
| 11 | BICF2P118799   | 44414986 | 0 | 0   | 0      | A |
| 11 | BICF2S23538466 | 44426498 | 0 | 0   | 0      | A |
| 11 | BICF2P744682   | 44445082 | A | 0   | 0.2857 | G |
| 11 | BICF2P424384   | 44453132 | 0 | 0   | 0      | G |
| 11 | BICF2P904461   | 44466294 | G | 1   | 1      | A |
| 11 | BICF2P534098   | 44480366 | 0 | 0   | 0      | A |
| 11 | BICF2S2299761  | 44493914 | 0 | 0   | 0      | G |
| 11 | BICF2P808103   | 44510154 | 0 | 0   | 0      | A |
| 11 | BICF2P1049940  | 44524302 | 0 | 0   | 0      | G |
| 11 | BICF2P724359   | 44547704 | G | 1   | 1      | A |
| 11 | BICF2P50797    | 44554913 | G | 0.5 | 0.7857 | A |

|    |                |          |   |     |        |   |
|----|----------------|----------|---|-----|--------|---|
| 11 | BICF2P927085   | 44577022 | A | 0.5 | 0.1667 | G |
| 11 | BICF2P579523   | 44591529 | A | 0.5 | 0.5    | G |
| 11 | BICF2S22915698 | 44604579 | A | 0.5 | 0.2143 | G |
| 11 | BICF2P1175025  | 44612973 | A | 0   | 0.2857 | G |
| 11 | BICF2P328680   | 44630596 | A | 0.5 | 0.7857 | G |
| 11 | BICF2P184297   | 44660715 | C | 0.5 | 0.5    | A |
| 11 | BICF2P543656   | 44672572 | A | 0   | 0      | G |
| 11 | BICF2P420381   | 44677565 | A | 0.5 | 0.5    | G |
| 11 | BICF2S23038599 | 44693793 | A | 0   | 0      | G |
| 11 | BICF2S23059475 | 44705090 | A | 0   | 0      | G |
| 11 | BICF2S2418062  | 44713481 | T | 0   | 0      | A |
| 11 | BICF2P549513   | 44729939 | 0 | 0   | 0      | G |
| 11 | BICF2S22947334 | 44756627 | G | 0   | 0      | A |
| 11 | BICF2P467548   | 44769205 | G | 1   | 0.7143 | A |
| 11 | BICF2P209774   | 44774510 | A | 0   | 0      | G |
| 11 | BICF2P280953   | 44783863 | C | 1   | 0.7143 | A |
| 11 | BICF2P1320206  | 44793361 | C | 1   | 0.7143 | A |
| 11 | BICF2P631922   | 44806547 | A | 0   | 0      | T |
| 11 | BICF2S23727905 | 44818850 | G | 1   | 0.7143 | A |
| 11 | BICF2S23211994 | 44835515 | A | 1   | 0.75   | G |
| 11 | BICF2S2333483  | 44864295 | A | 1   | 0.7143 | G |
| 11 | BICF2P581065   | 44880612 | G | 0   | 0      | A |
| 11 | BICF2P915963   | 44886441 | 0 | 0   | 0      | A |
| 11 | BICF2S23161967 | 44923660 | G | 0   | 0      | A |
| 11 | BICF2P696637   | 44958279 | C | 0.5 | 0.2143 | A |
| 11 | BICF2P772811   | 44965936 | A | 0   | 0      | G |
| 11 | BICF2P358942   | 44984474 | A | 0   | 0      | G |
| 11 | BICF2P252135   | 44999032 | G | 0   | 0      | A |
| 11 | BICF2P1205646  | 45004762 | A | 0   | 0      | G |
| 11 | BICF2P1094047  | 45029982 | G | 0.5 | 0.5    | A |
| 11 | BICF2P1148640  | 45037509 | C | 0.5 | 0.5    | A |
| 11 | BICF2P357595   | 45066620 | A | 0   | 0      | T |
| 11 | BICF2P1353884  | 45094192 | A | 0   | 0      | T |
| 11 | BICF2P883670   | 45110041 | 0 | 0   | 0      | C |
| 11 | BICF2P253677   | 45147623 | A | 0.5 | 0.5    | G |
| 11 | BICF2S23612092 | 45155802 | 0 | 0   | 0      | G |
| 11 | BICF2P130936   | 45179756 | 0 | 0   | 0      | A |
| 11 | BICF2P747033   | 45191870 | G | 0   | 0      | A |
| 11 | BICF2P1092990  | 45202756 | C | 0   | 0      | A |
| 11 | BICF2P1310326  | 45212163 | A | 0   | 0      | G |
| 11 | BICF2P553101   | 45219630 | A | 0   | 0      | G |
| 11 | BICF2P945263   | 45233825 | G | 1   | 1      | A |
| 11 | BICF2P897045   | 45268401 | A | 0   | 0      | G |
| 11 | BICF2S23035903 | 45282089 | C | 0.5 | 0.5    | A |
| 11 | BICF2S23313216 | 45294278 | G | 0.5 | 0.5    | A |
| 11 | BICF2S22940978 | 45308680 | G | 0   | 0      | C |
| 11 | BICF2P326067   | 45313163 | C | 0   | 0      | A |

|    |                         |          |   |     |        |   |
|----|-------------------------|----------|---|-----|--------|---|
| 11 | BICF2S2307483           | 45323239 | A | 0   | 0      | G |
| 11 | BICF2P1106520           | 45339750 | 0 | 0   | 0      | A |
| 11 | BICF2P779797            | 45347171 | 0 | 0   | 0      | A |
| 11 | BICF2P592088            | 45367388 | 0 | 0   | 0      | A |
| 11 | BICF2P1464790           | 45386307 | A | 0.5 | 0.5    | C |
| 11 | BICF2P252840            | 45398379 | 0 | 0   | 0      | G |
| 11 | BICF2P1208897           | 45409701 | C | 0   | 0.25   | A |
| 11 | BICF2S23539613          | 45429938 | A | 0   | 0      | G |
| 11 | BICF2P1004921           | 45458427 | 0 | 0   | 0      | A |
| 11 | BICF2P376164            | 45468192 | 0 | 0   | 0      | A |
| 11 | BICF2P94610             | 45477045 | 0 | 0   | 0      | A |
| 11 | BICF2P793037            | 45510046 | A | 0   | 0      | G |
| 11 | BICF2P698482            | 45517155 | G | 0.5 | 0.7857 | A |
| 11 | BICF2P2085              | 45539910 | 0 | 0   | 0      | A |
| 11 | BICF2P565575            | 45548346 | 0 | 0   | 0      | A |
| 11 | BICF2P1284853           | 45555892 | 0 | 0   | 0      | A |
| 11 | BICF2P608520            | 45564379 | A | 0.5 | 0.1667 | C |
| 11 | BICF2P514718            | 45587628 | 0 | 0   | 0      | A |
| 11 | BICF2P1162939           | 45600471 | C | 0.5 | 0.2143 | A |
| 11 | BICF2P354483            | 45601462 | A | 0   | 0      | G |
| 11 | BICF2P390581            | 45611645 | A | 0.5 | 0.2143 | T |
| 11 | BICF2S2321514           | 45621132 | G | 0.5 | 0.2143 | A |
| 11 | BICF2S22946559          | 45633151 | A | 0.5 | 0.2143 | G |
| 11 | BICF2P639825            | 45640016 | G | 0.5 | 0.2143 | A |
| 11 | BICF2P508867            | 45652639 | T | 0   | 0      | A |
| 11 | BICF2P445109            | 45660985 | G | 0.5 | 0.2143 | A |
| 11 | BICF2S23646251          | 45670551 | C | 0.5 | 0.2143 | A |
| 11 | BICF2P935930            | 45678285 | 0 | 0   | 0      | G |
| 11 | BICF2P417220            | 45699251 | G | 1   | 1      | A |
| 11 | BICF2P1214187           | 45706407 | C | 1   | 1      | A |
| 11 | BICF2S23036750          | 45721981 | A | 0.5 | 0.2143 | G |
| 11 | BICF2S23036835          | 45725791 | A | 0.5 | 0.2143 | G |
| 11 | BICF2S23129084          | 45746678 | A | 0.5 | 0.7857 | G |
| 11 | TIGRP2P149142_rs9066282 | 45747349 | 0 | 0   | 0      | G |
| 11 | BICF2P931370            | 45765479 | A | 0   | 0      | C |
| 11 | BICF2S23149094          | 45771049 | A | 1   | 1      | G |
| 11 | BICF2P225162            | 45785355 | A | 1   | 1      | G |
| 11 | BICF2P829767            | 45811146 | 0 | 0   | 0      | A |
| 11 | BICF2S23125400          | 45839978 | A | 1   | 1      | G |
| 11 | BICF2S22939358          | 45860080 | T | 0   | 0      | A |
| 11 | BICF2S22958726          | 45863993 | G | 0   | 0      | A |
| 11 | BICF2P1062037           | 45874607 | A | 0   | 0      | G |
| 11 | BICF2P1035641           | 45892929 | A | 0   | 0      | G |
| 11 | BICF2P895488            | 45902704 | A | 0   | 0      | G |
| 11 | BICF2P751277            | 45909153 | G | 0   | 0      | A |
| 11 | BICF2P1402008           | 45922322 | T | 0   | 0      | A |
| 11 | BICF2P563135            | 45935233 | A | 0   | 0      | G |

|    |                         |          |   |     |        |   |
|----|-------------------------|----------|---|-----|--------|---|
| 11 | BICF2P447098            | 45944793 | A | 0   | 0      | G |
| 11 | BICF2P182562            | 45960245 | T | 0   | 0      | A |
| 11 | BICF2P127226            | 45970800 | 0 | 0   | 0      | A |
| 11 | BICF2S23426602          | 45994328 | 0 | 0   | 0      | C |
| 11 | BICF2P793084            | 46001562 | 0 | 0   | 0      | G |
| 11 | BICF2P1364544           | 46020241 | G | 0   | 0      | A |
| 11 | BICF2S23146872          | 46028156 | 0 | 0   | 0      | G |
| 11 | BICF2P971958            | 46042054 | G | 0   | 0      | A |
| 11 | BICF2P182717            | 46048540 | G | 0   | 0      | A |
| 11 | BICF2P138114            | 46071634 | A | 0   | 0      | G |
| 11 | BICF2P566079            | 46090962 | G | 0   | 0      | A |
| 11 | BICF2P543167            | 46094426 | A | 0   | 0      | G |
| 11 | BICF2P831782            | 46107219 | A | 0   | 0      | G |
| 11 | BICF2P610065            | 46123230 | A | 0   | 0      | T |
| 11 | BICF2P554214            | 46126703 | A | 0   | 0      | G |
| 11 | TIGRP2P149151_rs8655834 | 46142264 | 0 | 0   | 0      | A |
| 11 | BICF2P336320            | 46158528 | A | 0   | 0      | G |
| 11 | BICF2S23714821          | 46162597 | A | 0   | 0      | G |
| 11 | BICF2S23139736          | 46173907 | G | 1   | 1      | A |
| 11 | BICF2S23018084          | 46189651 | G | 1   | 1      | A |
| 11 | TIGRP2P149152_rs8930858 | 46203385 | 0 | 0   | 0      | A |
| 11 | BICF2P1293369           | 46216701 | A | 0   | 0      | G |
| 11 | BICF2P522887            | 46227068 | A | 0   | 0      | G |
| 11 | BICF2P587033            | 46238346 | C | 0   | 0      | A |
| 11 | BICF2P206180            | 46253068 | A | 0.5 | 0.7857 | G |
| 11 | BICF2P1279371           | 46270211 | G | 0   | 0      | A |
| 11 | BICF2P190879            | 46276994 | G | 0   | 0      | A |
| 11 | BICF2S22960301          | 46288733 | A | 0   | 0      | C |
| 11 | BICF2P913178            | 46304934 | A | 0.5 | 0.7857 | C |
| 11 | BICF2P1030340           | 46328447 | C | 0.5 | 0.7857 | A |
| 11 | BICF2P857657            | 46341162 | G | 0.5 | 0.7857 | A |
| 11 | BICF2P526533            | 46345585 | A | 0.5 | 0.7857 | G |
| 11 | BICF2P1209884           | 46379460 | 0 | 0   | 0      | G |
| 11 | BICF2P1364243           | 46401753 | 0 | 0   | 0      | A |
| 11 | BICF2P979113            | 46410436 | G | 0   | 0      | A |
| 11 | BICF2P833942            | 46421959 | 0 | 0   | 0      | G |
| 11 | BICF2P815662            | 46431451 | 0 | 0   | 0      | C |
| 11 | BICF2P358190            | 46437062 | 0 | 0   | 0      | G |
| 11 | BICF2P408669            | 46466693 | 0 | 0   | 0      | G |
| 11 | BICF2P577736            | 46473402 | G | 0   | 0      | A |
| 11 | BICF2P800096            | 46485740 | 0 | 0   | 0      | G |
| 11 | BICF2P1412427           | 46494943 | A | 0   | 0      | G |
| 11 | BICF2P760495            | 46508814 | A | 0   | 0      | G |
| 11 | BICF2P1292455           | 46519965 | A | 0   | 0      | G |
| 11 | BICF2P399065            | 46529033 | A | 0.5 | 0.7857 | C |
| 11 | BICF2S23116582          | 46549153 | 0 | 0   | 0      | G |
| 11 | BICF2P312548            | 46560701 | A | 0   | 0      | G |

|    |                         |          |   |     |        |   |
|----|-------------------------|----------|---|-----|--------|---|
| 11 | BICF2P619844            | 46563995 | 0 | 0   | 0      | G |
| 11 | BICF2S23010316          | 46582960 | A | 0.5 | 0.5    | G |
| 11 | BICF2P1210347           | 46588154 | C | 0.5 | 0.5    | A |
| 11 | BICF2P95006             | 46599028 | A | 0   | 0      | G |
| 11 | BICF2P1168820           | 46611227 | A | 0.5 | 0.5    | T |
| 11 | BICF2P1421907           | 46621466 | G | 0   | 0      | A |
| 11 | BICF2P775411            | 46643381 | A | 0.5 | 0.5    | G |
| 11 | BICF2P850766            | 46650757 | G | 0.5 | 0.5    | A |
| 11 | BICF2P187007            | 46655617 | A | 0.5 | 0.5    | G |
| 11 | BICF2P712983            | 46674014 | A | 0.5 | 0.5    | C |
| 11 | BICF2S23747665          | 46680802 | A | 0.5 | 0.5    | G |
| 11 | BICF2P1293563           | 46696799 | A | 0   | 0      | G |
| 11 | BICF2S23659890          | 46708501 | A | 0   | 0      | C |
| 11 | BICF2S23631060          | 46719416 | G | 0.5 | 0.5    | A |
| 11 | BICF2P274858            | 46732880 | 0 | 0   | 0      | G |
| 11 | BICF2P860484            | 46738459 | A | 0   | 0      | G |
| 11 | BICF2P222103            | 46750486 | A | 0   | 0      | G |
| 11 | BICF2P532512            | 46761510 | A | 0   | 0      | G |
| 11 | BICF2P292206            | 46771966 | T | 0   | 0      | A |
| 11 | BICF2P292207            | 46772068 | A | 0   | 0      | G |
| 11 | BICF2P1210652           | 46785901 | G | 0   | 0      | A |
| 11 | BICF2P604118            | 46799066 | A | 0.5 | 0.7857 | C |
| 11 | BICF2P186535            | 46806996 | G | 0.5 | 0.7857 | A |
| 11 | BICF2S23229447          | 46819643 | A | 0   | 0.25   | G |
| 11 | BICF2S23336218          | 46838606 | G | 0   | 0      | A |
| 11 | BICF2P1363557           | 46841479 | A | 0   | 0      | G |
| 11 | BICF2P1363558           | 46841751 | 0 | 0   | 0      | C |
| 11 | BICF2P292180            | 46860855 | A | 0.5 | 0.7857 | G |
| 11 | BICF2P510357            | 46864844 | G | 0   | 0      | A |
| 11 | BICF2P822019            | 46880198 | G | 0   | 0      | A |
| 11 | BICF2P90662             | 46885511 | A | 0   | 0      | G |
| 11 | BICF2P598169            | 46903396 | T | 0   | 0      | A |
| 11 | BICF2S2378697           | 46919696 | 0 | 0   | 0      | G |
| 11 | BICF2P108638            | 46930830 | A | 0   | 0      | G |
| 11 | BICF2P108640            | 46931538 | A | 0   | 0      | G |
| 11 | BICF2P1389991           | 46948403 | G | 0.5 | 0.7857 | A |
| 11 | BICF2P704983            | 46979129 | 0 | 0   | 0      | G |
| 11 | TIGRP2P149163_rs9128109 | 46998036 | 0 | 0   | 0      | A |
| 11 | BICF2P744905            | 47006398 | 0 | 0   | 0      | A |
| 11 | BICF2P703163            | 47020382 | G | 0   | 0      | A |
| 11 | BICF2P1045820           | 47032463 | 0 | 0   | 0      | C |
| 11 | BICF2P1159630           | 47036618 | G | 0   | 0      | A |
| 11 | BICF2P910477            | 47047925 | A | 0.5 | 0.2143 | G |
| 11 | BICF2P190322            | 47072725 | 0 | 0   | 0      | G |
| 11 | BICF2P623925            | 47083631 | 0 | NA  | 0      | A |
| 11 | BICF2P910619            | 47093017 | 0 | 0   | 0      | G |
| 11 | BICF2P480161            | 47113117 | 0 | 0   | 0      | G |

|    |                         |          |   |     |        |   |
|----|-------------------------|----------|---|-----|--------|---|
| 11 | BICF2P168227            | 47126350 | A | 0.5 | 0.7857 | G |
| 11 | BICF2P1376345           | 47127398 | A | 0.5 | 0.7857 | C |
| 11 | BICF2P221070            | 47153895 | G | 0.5 | 0.2143 | A |
| 11 | BICF2P545628            | 47162145 | G | 1   | 1      | A |
| 11 | BICF2P890348            | 47179346 | A | 1   | 1      | G |
| 11 | BICF2P417618            | 47185339 | A | 0   | 0      | G |
| 11 | BICF2P102722            | 47206060 | A | 1   | 1      | G |
| 11 | BICF2P1241047           | 47210057 | A | 0   | 0      | C |
| 11 | BICF2P200135            | 47229295 | G | 0   | 0      | A |
| 11 | BICF2P245467            | 47238300 | A | 0   | 0      | C |
| 11 | BICF2P1333221           | 47243760 | A | 0   | 0      | G |
| 11 | BICF2P109422            | 47267166 | A | 0   | 0      | G |
| 11 | BICF2P596562            | 47282503 | A | 0   | 0      | G |
| 11 | BICF2S23526247          | 47291685 | G | 1   | 1      | A |
| 11 | BICF2P880621            | 47306190 | 0 | 0   | 0      | A |
| 11 | BICF2S2355443           | 47320717 | C | 1   | 1      | A |
| 11 | BICF2P147773            | 47339845 | 0 | 0   | 0      | C |
| 11 | BICF2S2351143           | 47347854 | A | 1   | 1      | G |
| 11 | BICF2P584000            | 47360318 | A | 1   | 1      | G |
| 11 | BICF2P1073463           | 47369670 | A | 1   | 1      | C |
| 11 | TIGRP2P149166_rs9161523 | 47382199 | 0 | 0   | 0      | G |
| 11 | BICF2P411826            | 47395809 | A | 0   | 0      | G |
| 11 | BICF2P423300            | 47404632 | T | 0   | 0      | A |
| 11 | BICF2S22915918          | 47415122 | C | 0   | 0      | A |
| 11 | BICF2P1262381           | 47426808 | G | 0   | 0      | A |
| 11 | BICF2P574732            | 47448928 | A | 0   | 0      | G |
| 11 | BICF2P890469            | 47452095 | C | 0   | 0      | A |
| 11 | BICF2P425442            | 47465571 | A | 0   | 0      | G |
| 11 | BICF2P1128413           | 47480462 | C | 0   | 0      | A |
| 11 | BICF2S23738121          | 47489929 | G | 1   | 1      | A |
| 11 | BICF2P300868            | 47499377 | A | 0   | 0      | C |
| 11 | BICF2P306059            | 47507236 | G | 0   | 0      | A |
| 11 | BICF2P911285            | 47522122 | A | 0   | 0      | G |
| 11 | BICF2S23024768          | 47533645 | G | 0   | 0      | C |
| 11 | BICF2P21492             | 47544247 | A | 0   | 0      | G |
| 11 | BICF2S23531268          | 47559434 | G | 1   | 1      | A |
| 11 | BICF2P1113472           | 47571559 | 0 | 0   | 0      | G |
| 11 | BICF2S2444783           | 47592902 | G | 0   | 0      | A |
| 11 | BICF2P883844            | 47605292 | 0 | 0   | 0      | G |
| 11 | BICF2S23057394          | 47610237 | G | 0   | 0      | A |
| 11 | TIGRP2P149168_rs8620472 | 47629857 | 0 | 0   | 0      | A |
| 11 | BICF2S22915631          | 47653194 | G | 0   | 0      | A |
| 11 | BICF2S22915802          | 47657116 | A | 0   | 0      | G |
| 11 | TIGRP2P149170_rs8548665 | 47676413 | 0 | 0   | 0      | A |
| 11 | BICF2S23723265          | 47679803 | A | 0   | 0      | G |
| 11 | BICF2P888170            | 47693240 | 0 | 0   | 0      | G |
| 11 | BICF2P1356220           | 47703252 | G | 1   | 1      | A |

|    |                         |          |   |   |        |   |
|----|-------------------------|----------|---|---|--------|---|
| 11 | BICF2P1151055           | 47722385 | G | 1 | 1      | A |
| 11 | BICF2P149929            | 47726389 | G | 1 | 1      | A |
| 11 | BICF2S23119494          | 47742815 | A | 0 | 0      | C |
| 11 | BICF2P434988            | 47754806 | A | 0 | 0      | C |
| 11 | BICF2P305045            | 47756974 | G | 0 | 0      | A |
| 11 | BICF2P285352            | 47764404 | A | 0 | 0      | G |
| 11 | BICF2S23149053          | 47773990 | G | 0 | 0      | A |
| 11 | BICF2S23038964          | 47790432 | G | 0 | 0      | A |
| 11 | BICF2S23048374          | 47795516 | A | 0 | 0      | G |
| 11 | BICF2S23111189          | 47806096 | A | 0 | 0      | G |
| 11 | BICF2S23635468          | 47825025 | A | 0 | 0      | G |
| 11 | BICF2P145719            | 47837755 | A | 0 | 0      | G |
| 11 | BICF2S23237106          | 47849866 | A | 0 | 0      | G |
| 11 | BICF2P461854            | 47853491 | A | 0 | 0      | C |
| 11 | BICF2S23352615          | 47854582 | G | 0 | 0      | A |
| 11 | BICF2P1007947           | 47864097 | C | 0 | 0      | A |
| 11 | BICF2S23247196          | 47877076 | G | 0 | 0      | A |
| 11 | BICF2P782460            | 47906150 | G | 0 | 0      | A |
| 11 | BICF2P267090            | 47913773 | C | 0 | 0      | A |
| 11 | BICF2S23452166          | 47941909 | G | 1 | 1      | A |
| 11 | BICF2P196834            | 47952894 | 0 | 0 | 0      | G |
| 11 | BICF2P263515            | 47964185 | 0 | 0 | 0      | C |
| 11 | BICF2P1460834           | 47973733 | A | 0 | 0.2857 | G |
| 11 | BICF2P215738            | 47994938 | G | 0 | 0      | A |
| 11 | BICF2P1276143           | 48003285 | G | 0 | 0      | A |
| 11 | BICF2P408301            | 48013268 | A | 1 | 0.7143 | G |
| 11 | BICF2S22954179          | 48028132 | G | 0 | 0.2857 | A |
| 11 | BICF2P1124119           | 48054058 | A | 0 | 0      | G |
| 11 | BICF2P620828            | 48066065 | A | 0 | 0      | G |
| 11 | BICF2P245636            | 48073094 | G | 0 | 0      | A |
| 11 | BICF2P185221            | 48095421 | 0 | 0 | 0      | A |
| 11 | BICF2P199426            | 48151459 | A | 0 | 0      | C |
| 11 | BICF2P198758            | 48168009 | A | 0 | 0      | C |
| 11 | BICF2P1011221           | 48176358 | A | 0 | 0      | G |
| 11 | BICF2P1239524           | 48190690 | A | 0 | 0      | G |
| 11 | TIGRP2P149176_rs8719295 | 48204730 | 0 | 0 | 0      | A |
| 11 | BICF2P1131285           | 48213981 | G | 0 | 0      | A |
| 11 | BICF2P370999            | 48226822 | G | 0 | 0      | A |
| 11 | BICF2P168729            | 48238283 | C | 0 | 0      | A |
| 11 | BICF2P332889            | 48246252 | A | 0 | 0      | G |
| 11 | BICF2P1408493           | 48256069 | 0 | 0 | 0      | A |
| 11 | BICF2P345345            | 48274353 | A | 0 | 0      | C |
| 11 | BICF2S23334802          | 48286285 | A | 1 | 1      | G |
| 11 | BICF2P363481            | 48290755 | A | 0 | 0      | G |
| 11 | BICF2P1403442           | 48303749 | G | 0 | 0      | A |
| 11 | BICF2P286827            | 48309492 | A | 0 | 0      | G |
| 11 | BICF2P1212859           | 48313925 | 0 | 0 | 0      | A |



|    |                         |          |   |   |   |   |
|----|-------------------------|----------|---|---|---|---|
| 11 | BICF2P20196             | 48326811 | A | 0 | 0 | G |
| 11 | BICF2P20195             | 48327705 | A | 0 | 0 | G |
| 11 | BICF2P836935            | 48342641 | 0 | 0 | 0 | A |
| 11 | BICF2S23330216          | 48348348 | A | 1 | 1 | G |
| 11 | BICF2P1012015           | 48364185 | A | 0 | 0 | G |
| 11 | BICF2S23439605          | 48370677 | A | 0 | 0 | C |
| 11 | BICF2P983355            | 48387121 | A | 0 | 0 | G |
| 11 | BICF2P114915            | 48393374 | C | 1 | 1 | A |
| 11 | BICF2P696959            | 48407696 | C | 0 | 0 | A |
| 11 | BICF2P157092            | 48417764 | T | 1 | 1 | A |
| 11 | BICF2S23723400          | 48443301 | A | 0 | 0 | G |
| 11 | G684f27S145             | 48462030 | C | 1 | 1 | A |
| 11 | G684f32S303             | 48479123 | G | 1 | 1 | A |
| 11 | BICF2S2376049           | 48492069 | G | 0 | 0 | A |
| 11 | BICF2S23256992          | 48497088 | G | 1 | 1 | A |
| 11 | BICF2P971011            | 48515683 | A | 1 | 1 | G |
| 11 | BICF2S23637205          | 48519624 | G | 0 | 0 | A |
| 11 | BICF2S23412031          | 48534559 | A | 0 | 0 | G |
| 11 | BICF2S23246713          | 48538625 | G | 0 | 0 | A |
| 11 | BICF2S23249373          | 48542441 | G | 0 | 0 | A |
| 11 | G685f66S210             | 48579395 | A | 0 | 0 | G |
| 11 | BICF2S23158872          | 48609921 | C | 0 | 0 | A |
| 11 | BICF2S2347183           | 48633069 | A | 0 | 0 | G |
| 11 | BICF2P866279            | 48636170 | 0 | 0 | 0 | G |
| 11 | BICF2P997633            | 48657023 | C | 1 | 1 | A |
| 11 | BICF2S23421745          | 48671095 | A | 0 | 0 | G |
| 11 | BICF2S23152100          | 48682052 | C | 1 | 1 | A |
| 11 | BICF2S23636714          | 48722459 | G | 0 | 0 | C |
| 11 | BICF2P774750            | 48742287 | 0 | 0 | 0 | A |
| 11 | BICF2S2458592           | 48755161 | C | 0 | 0 | A |
| 11 | G686f47S141             | 48767819 | G | 0 | 0 | A |
| 11 | BICF2P1285907           | 48791338 | C | 0 | 0 | A |
| 11 | TIGRP2P149180_rs8500443 | 48799152 | 0 | 0 | 0 | C |
| 11 | BICF2S22929901          | 48815832 | A | 0 | 0 | G |
| 11 | BICF2S22922797          | 48819805 | A | 0 | 0 | G |
| 11 | BICF2P186776            | 48830616 | G | 1 | 1 | A |
| 11 | TIGRP2P149184_rs8815557 | 48849024 | 0 | 0 | 0 | A |
| 11 | BICF2P1168652           | 48915662 | A | 0 | 0 | G |
| 11 | BICF2P946206            | 48931026 | A | 1 | 1 | C |
| 11 | BICF2P261204            | 48935254 | A | 1 | 1 | G |
| 11 | BICF2S23748784          | 48952831 | A | 1 | 1 | G |
| 11 | BICF2P199888            | 48958782 | G | 1 | 1 | A |
| 11 | BICF2P269909            | 48968756 | G | 1 | 1 | A |
| 11 | BICF2P415136            | 48979449 | T | 0 | 0 | A |
| 11 | BICF2S23440391          | 49000764 | A | 0 | 0 | G |
| 11 | BICF2S23439591          | 49003850 | G | 0 | 0 | A |
| 11 | BICF2P1246346           | 49020679 | A | 0 | 0 | G |

|    |                         |          |   |   |   |   |
|----|-------------------------|----------|---|---|---|---|
| 11 | BICF2P662744            | 49026739 | A | 0 | 0 | G |
| 11 | BICF2P318936            | 49038004 | A | 0 | 0 | G |
| 11 | G688f44S208             | 49064757 | A | 0 | 0 | G |
| 11 | BICF2S23413012          | 49087166 | A | 0 | 0 | G |
| 11 | BICF2S22959536          | 49094775 | G | 0 | 0 | A |
| 11 | BICF2P625740            | 49106712 | 0 | 0 | 0 | G |
| 11 | BICF2S23763532          | 49135869 | A | 0 | 0 | G |
| 11 | BICF2P457820            | 49149748 | C | 0 | 0 | A |
| 11 | BICF2P136387            | 49161446 | 0 | 0 | 0 | G |
| 11 | BICF2S23753930          | 49173150 | A | 0 | 0 | T |
| 11 | BICF2S22960066          | 49175109 | G | 0 | 0 | A |
| 11 | BICF2S23724168          | 49188329 | C | 0 | 0 | A |
| 11 | BICF2P904521            | 49205171 | 0 | 0 | 0 | A |
| 11 | BICF2S23235169          | 49210100 | G | 0 | 0 | A |
| 11 | BICF2P226287            | 49223791 | 0 | 0 | 0 | A |
| 11 | BICF2S22955634          | 49237846 | A | 0 | 0 | G |
| 11 | BICF2P878120            | 49319964 | G | 0 | 0 | A |
| 11 | BICF2P1201772           | 49333697 | G | 0 | 0 | A |
| 11 | BICF2S23546902          | 49341935 | A | 0 | 0 | G |
| 11 | BICF2P872591            | 49347739 | G | 0 | 0 | A |
| 11 | BICF2P1132957           | 49361096 | A | 0 | 0 | G |
| 11 | BICF2S23324524          | 49373643 | C | 0 | 0 | A |
| 11 | TIGRP2P149198_rs8919213 | 49383334 | 0 | 0 | 0 | G |
| 11 | BICF2P1167623           | 49392903 | G | 0 | 0 | A |
| 11 | BICF2P1298028           | 49405021 | A | 0 | 0 | G |
| 11 | BICF2S23630135          | 49418630 | G | 0 | 0 | A |
| 11 | BICF2S2358039           | 49436130 | 0 | 0 | 0 | G |
| 11 | BICF2P15341             | 49444497 | A | 0 | 0 | C |
| 11 | BICF2P683678            | 49455180 | G | 0 | 0 | A |
| 11 | BICF2S23553072          | 49468345 | C | 0 | 0 | A |
| 11 | BICF2P660943            | 49479434 | A | 0 | 0 | G |
| 11 | BICF2P466013            | 49487649 | G | 0 | 0 | A |
| 11 | BICF2S23642993          | 49496191 | A | 0 | 0 | G |
| 11 | BICF2S2357535           | 49523469 | C | 0 | 0 | A |
| 11 | BICF2P460649            | 49532805 | G | 1 | 1 | A |
| 11 | BICF2P1286850           | 49545201 | G | 1 | 1 | A |
| 11 | BICF2P918943            | 49564075 | G | 0 | 0 | A |
| 11 | BICF2P1084043           | 49568709 | A | 0 | 0 | G |
| 11 | BICF2P300308            | 49576821 | A | 0 | 0 | G |
| 11 | BICF2S2357632           | 49591546 | G | 0 | 0 | A |
| 11 | BICF2P622926            | 49606265 | A | 0 | 0 | G |
| 11 | BICF2S23414050          | 49611899 | A | 0 | 0 | G |
| 11 | BICF2P1402499           | 49623516 | G | 0 | 0 | A |
| 11 | BICF2P1334387           | 49640323 | G | 0 | 0 | C |
| 11 | BICF2S23553541          | 49654740 | G | 0 | 0 | A |
| 11 | G689f53S248             | 49713719 | 0 | 0 | 0 | C |
| 11 | G689f55S356             | 49714575 | A | 0 | 0 | G |

|    |                         |          |   |   |        |   |
|----|-------------------------|----------|---|---|--------|---|
| 11 | TIGRP2P149205_rs9011150 | 49764932 | 0 | 0 | 0      | G |
| 11 | TIGRP2P149207_rs9016053 | 49785027 | 0 | 0 | 0      | A |
| 11 | BICF2P1171040           | 49810962 | 0 | 0 | 0      | A |
| 11 | BICF2S23012319          | 49821797 | G | 0 | 0      | A |
| 11 | BICF2S23230771          | 49830159 | G | 0 | 0      | C |
| 11 | BICF2P241004            | 49883010 | 0 | 0 | 0      | A |
| 11 | BICF2P280562            | 49902204 | 0 | 0 | 0      | C |
| 11 | BICF2S2457817           | 49919852 | A | 0 | 0      | G |
| 11 | TIGRP2P149208_rs9063708 | 49931496 | 0 | 0 | 0      | A |
| 11 | BICF2P1438244           | 49933148 | 0 | 0 | 0      | C |
| 11 | BICF2P419374            | 49978689 | 0 | 0 | 0      | A |
| 11 | BICF2P631295            | 49995022 | 0 | 0 | 0      | C |
| 11 | G692f43S188             | 50016413 | 0 | 0 | 0      | C |
| 11 | BICF2P769410            | 50044609 | 0 | 0 | 0      | A |
| 11 | BICF2P1266357           | 50063676 | 0 | 0 | 0      | T |
| 11 | BICF2S2335461           | 50075186 | T | 0 | 0      | A |
| 11 | BICF2S22942684          | 50092549 | A | 1 | 1      | C |
| 11 | BICF2P1139597           | 50101267 | G | 1 | 1      | A |
| 11 | BICF2S2332607           | 50116295 | A | 1 | 1      | C |
| 11 | BICF2S23110673          | 50148285 | G | 1 | 1      | A |
| 11 | BICF2S23731607          | 50159325 | G | 1 | 1      | A |
| 11 | BICF2S23149698          | 50164266 | A | 1 | 1      | G |
| 11 | BICF2S23711217          | 50191006 | A | 1 | 1      | G |
| 11 | BICF2S23522286          | 50200990 | A | 1 | 1      | G |
| 11 | G693f51S238             | 50231293 | A | 1 | 1      | T |
| 11 | G693f56S286             | 50233462 | A | 1 | 1      | C |
| 11 | BICF2S2323965           | 50286560 | C | 1 | 1      | A |
| 11 | G694f25S287             | 50302742 | 0 | 0 | 0      | C |
| 11 | G695f35S43              | 50348134 | 0 | 0 | 0      | C |
| 11 | G697f11S121             | 50431081 | G | 0 | 0      | A |
| 11 | G698f26S218             | 50467690 | 0 | 0 | 0      | A |
| 11 | BICF2P469758            | 50534693 | A | 1 | 0.7143 | G |
| 11 | G700f32S293             | 50552051 | 0 | 0 | 0      | C |
| 11 | BICF2P142249            | 50570805 | 0 | 0 | 0      | A |
| 11 | BICF2P343058            | 50577659 | 0 | 0 | 0      | G |
| 11 | BICF2P516156            | 50604853 | A | 0 | 0      | C |
| 11 | BICF2P781699            | 50621367 | A | 0 | 0      | G |
| 11 | BICF2S23258104          | 50630537 | A | 0 | 0      | C |
| 11 | BICF2P284868            | 50634856 | A | 0 | 0      | G |
| 11 | BICF2P123144            | 50647414 | G | 0 | 0      | A |
| 11 | BICF2S23340038          | 50658370 | C | 0 | 0      | A |
| 11 | BICF2S23340638          | 50661636 | G | 0 | 0      | A |
| 11 | BICF2S23011640          | 50681958 | A | 0 | 0      | C |
| 11 | BICF2P564568            | 50713638 | A | 0 | 0      | G |
| 11 | BICF2P1205845           | 50720767 | G | 0 | 0      | A |
| 11 | BICF2P350292            | 50726954 | G | 0 | 0      | A |
| 11 | BICF2P1233736           | 50747224 | A | 0 | 0      | G |

|    |                         |          |   |   |        |   |
|----|-------------------------|----------|---|---|--------|---|
| 11 | BICF2S23310034          | 50754199 | A | 1 | 1      | G |
| 11 | BICF2S23013343          | 50771804 | A | 0 | 0      | T |
| 11 | BICF2S23741633          | 50775357 | G | 0 | 0      | A |
| 11 | BICF2S2341185           | 50788702 | A | 1 | 1      | G |
| 11 | TIGRP2P149252_rs8981591 | 50802510 | 0 | 0 | 0      | G |
| 11 | BICF2S22924597          | 50810715 | A | 0 | 0      | G |
| 11 | BICF2S22948407          | 50841199 | 0 | 0 | 0      | G |
| 11 | BICF2P1067075           | 50875676 | A | 1 | 1      | G |
| 11 | BICF2P1067077           | 50876879 | A | 1 | 0.7143 | G |
| 11 | BICF2P491478            | 50893136 | G | 1 | 0.7143 | A |
| 11 | BICF2S23018721          | 50899073 | G | 0 | 0      | A |
| 11 | BICF2P333673            | 50916140 | C | 0 | 0      | A |
| 11 | BICF2P589083            | 50926276 | A | 1 | 0.7143 | G |
| 11 | BICF2P725977            | 50934783 | 0 | 0 | 0      | A |
| 11 | BICF2P68068             | 50958778 | G | 1 | 0.7143 | A |
| 11 | BICF2P1057482           | 50968784 | A | 0 | 0      | G |
| 11 | BICF2P984935            | 51002324 | 0 | 0 | 0      | A |
| 11 | BICF2P1052415           | 51034009 | G | 0 | 0      | A |
| 11 | G701f37S366             | 51059403 | 0 | 0 | 0      | A |
| 11 | BICF2P899459            | 51090553 | A | 0 | 0.2857 | C |
| 11 | BICF2P748229            | 51103203 | C | 0 | 0      | A |
| 11 | BICF2S24410135          | 51108662 | A | 0 | 0      | G |
| 11 | BICF2S2292087           | 51134161 | A | 0 | 0      | G |
| 11 | BICF2P765018            | 51157654 | 0 | 0 | 0      | C |
| 11 | BICF2P369578            | 51174879 | A | 0 | 0      | T |
| 11 | BICF2P1251910           | 51227832 | A | 0 | 0      | G |
| 11 | BICF2P256245            | 51245507 | 0 | 0 | 0      | A |
| 11 | BICF2P424899            | 51261797 | A | 0 | 0      | G |
| 11 | BICF2S2395920           | 51290403 | C | 0 | 0      | G |
| 11 | BICF2S23634061          | 51310429 | G | 0 | 0      | A |
| 11 | BICF2S23635002          | 51315154 | G | 0 | 0      | A |
| 11 | BICF2P128592            | 51327022 | C | 0 | 0      | A |
| 11 | BICF2P835237            | 51360575 | C | 0 | 0      | A |
| 11 | BICF2P218210            | 51403971 | G | 0 | 0      | A |
| 11 | BICF2P156310            | 51416357 | 0 | 0 | 0      | A |
| 11 | BICF2P851370            | 51418830 | A | 0 | 0      | G |
| 11 | BICF2P385563            | 51430905 | A | 0 | 0      | G |
| 11 | BICF2P1502842           | 51444831 | A | 0 | 0      | G |
| 11 | BICF2P519098            | 51451491 | A | 0 | 0      | G |
| 11 | BICF2P609895            | 51465004 | G | 0 | 0      | A |
| 11 | BICF2P1274852           | 51478375 | C | 0 | 0      | A |
| 11 | BICF2P553369            | 51486975 | A | 0 | 0      | G |
| 11 | BICF2P502784            | 51504406 | A | 1 | 0.7143 | G |
| 11 | BICF2P1167388           | 51510678 | A | 0 | 0      | G |
| 11 | BICF2P278819            | 51530419 | C | 0 | 0      | A |
| 11 | BICF2P140694            | 51537278 | G | 0 | 0      | A |
| 11 | BICF2P885474            | 51551327 | C | 0 | 0      | A |

|    |                         |          |   |   |        |   |
|----|-------------------------|----------|---|---|--------|---|
| 11 | BICF2P1239981           | 51567073 | T | 0 | 0      | A |
| 11 | BICF2P265255            | 51584388 | G | 0 | 0      | A |
| 11 | BICF2P823532            | 51614562 | 0 | 0 | 0      | A |
| 11 | BICF2P765592            | 51658169 | 0 | 0 | 0      | A |
| 11 | BICF2P1141977           | 51678726 | A | 0 | 0      | C |
| 11 | BICF2P1331674           | 51736287 | 0 | 0 | 0      | A |
| 11 | BICF2P314314            | 51742735 | A | 0 | 0      | G |
| 11 | BICF2P399180            | 51764224 | 0 | 0 | 0      | G |
| 11 | BICF2P1114911           | 51797025 | 0 | 0 | 0      | A |
| 11 | BICF2P346937            | 51820329 | 0 | 0 | 0      | A |
| 11 | BICF2P1168788           | 51832858 | A | 0 | 0.2857 | G |
| 11 | BICF2P1008365           | 51842314 | A | 0 | 0.2857 | G |
| 11 | BICF2P400078            | 51854682 | C | 0 | 0.2857 | A |
| 11 | BICF2P157813            | 51871483 | A | 0 | 0.2857 | G |
| 11 | BICF2P1143084           | 51892236 | A | 0 | 0.2857 | C |
| 11 | BICF2P555426            | 51945109 | 0 | 0 | 0      | A |
| 11 | BICF2P429850            | 51970430 | A | 0 | 0      | C |
| 11 | TIGRP2P149274_rs8956398 | 51989051 | 0 | 0 | 0      | A |
| 11 | BICF2P1008617           | 51997211 | C | 0 | 0.2857 | A |
| 11 | BICF2S23434356          | 52019219 | A | 0 | 0      | G |
| 11 | BICF2P558943            | 52046833 | G | 0 | 0      | A |
| 11 | BICF2P49966             | 52066646 | G | 0 | 0      | A |
| 11 | BICF2P1054145           | 52091533 | C | 0 | 0      | A |
| 11 | BICF2S23620648          | 52123518 | A | 0 | 0      | G |
| 11 | BICF2P390026            | 52151231 | A | 0 | 0      | G |
| 11 | BICF2P251746            | 52153625 | C | 0 | 0      | A |
| 11 | BICF2P111729            | 52165512 | A | 0 | 0      | G |
| 11 | TIGRP2P149276_rs8556027 | 52180881 | 0 | 0 | 0      | G |
| 11 | BICF2P662445            | 52195504 | G | 0 | 0      | A |
| 11 | BICF2P403329            | 52213439 | A | 0 | 0      | G |
| 11 | BICF2S23321113          | 52226546 | A | 0 | 0      | C |
| 11 | BICF2P199206            | 52255898 | C | 0 | 0      | G |
| 11 | TIGRP2P149279_rs9120141 | 52275063 | 0 | 0 | 0      | G |
| 11 | BICF2S23525663          | 52288596 | 0 | 0 | 0      | G |
| 11 | TIGRP2P149280_rs9200645 | 52303999 | 0 | 0 | 0      | G |
| 11 | BICF2P197885            | 52314827 | 0 | 0 | 0      | A |
| 11 | BICF2P891943            | 52357324 | 0 | 0 | 0      | A |
| 11 | BICF2P641224            | 52361149 | 0 | 0 | 0      | A |
| 11 | BICF2P1362875           | 52371013 | 0 | 0 | 0      | T |
| 11 | BICF2S22964956          | 52402938 | G | 0 | 0      | A |
| 11 | BICF2S22965117          | 52406330 | G | 0 | 0      | A |
| 11 | BICF2S22960419          | 52422105 | G | 0 | 0      | A |
| 11 | BICF2P369690            | 52439434 | 0 | 0 | 0      | A |
| 11 | BICF2S23542870          | 52453969 | G | 0 | 0      | A |
| 11 | BICF2S23912251          | 52505214 | 0 | 0 | 0      | G |
| 11 | BICF2S23628382          | 52518078 | A | 1 | 1      | G |
| 11 | BICF2S23754121          | 52523033 | G | 1 | 1      | A |

|    |                         |          |   |   |   |   |
|----|-------------------------|----------|---|---|---|---|
| 11 | BICF2P998323            | 52533862 | A | 0 | 0 | G |
| 11 | BICF2S23416181          | 52559641 | A | 0 | 0 | T |
| 11 | BICF2P1328573           | 52575241 | G | 0 | 0 | A |
| 11 | BICF2P273617            | 52585575 | C | 0 | 0 | A |
| 11 | BICF2P263856            | 52591612 | C | 1 | 1 | A |
| 11 | BICF2P777546            | 52603478 | 0 | 0 | 0 | A |
| 11 | BICF2P645865            | 52617559 | 0 | 0 | 0 | A |
| 11 | BICF2S23658614          | 52634317 | A | 0 | 0 | C |
| 11 | BICF2P1383556           | 52661978 | G | 0 | 0 | A |
| 11 | TIGRP2P149283_rs8905001 | 52672296 | 0 | 0 | 0 | C |
| 11 | BICF2P561069            | 52695482 | 0 | 0 | 0 | C |
| 11 | BICF2P1051344           | 52714610 | 0 | 0 | 0 | A |
| 11 | BICF2P983486            | 52727191 | A | 0 | 0 | G |
| 11 | BICF2P596905            | 52732484 | G | 0 | 0 | A |
| 11 | BICF2P179605            | 52746395 | A | 0 | 0 | G |
| 11 | BICF2P596766            | 52761808 | A | 0 | 0 | G |
| 11 | BICF2S2324173           | 52785198 | A | 0 | 0 | G |
| 11 | BICF2P24288             | 52796840 | A | 0 | 0 | G |
| 11 | TIGRP2P149290_rs8869838 | 52817916 | 0 | 0 | 0 | G |
| 11 | G704f59S102             | 52832730 | A | 0 | 0 | G |
| 11 | BICF2S245400            | 52856584 | 0 | 0 | 0 | A |
| 11 | BICF2P506000            | 52882871 | 0 | 0 | 0 | G |
| 11 | BICF2S23153864          | 52902595 | A | 0 | 0 | G |
| 11 | BICF2P779489            | 52905383 | G | 0 | 0 | A |
| 11 | BICF2P441340            | 52910666 | G | 0 | 0 | C |
| 11 | BICF2P1141045           | 52916016 | A | 0 | 0 | G |
| 11 | BICF2S23038853          | 52927078 | G | 0 | 0 | A |
| 11 | BICF2P75740             | 52935880 | C | 0 | 0 | G |
| 11 | BICF2S23039982          | 52946058 | C | 0 | 0 | A |
| 11 | BICF2S23141820          | 52964908 | G | 0 | 0 | A |
| 11 | BICF2S23144375          | 52968737 | G | 0 | 0 | A |
| 11 | BICF2S23159413          | 52975685 | A | 0 | 0 | G |
| 11 | BICF2S23042286          | 52991450 | A | 0 | 0 | G |
| 11 | BICF2S23213250          | 52993465 | G | 0 | 0 | A |
| 11 | BICF2S23032888          | 53011721 | G | 0 | 0 | A |
| 11 | BICF2S23024657          | 53015531 | A | 0 | 0 | C |
| 11 | BICF2P615496            | 53031868 | 0 | 0 | 0 | A |
| 11 | BICF2S23017165          | 53056893 | A | 0 | 0 | G |
| 11 | BICF2S23712261          | 53066506 | G | 0 | 0 | A |
| 11 | BICF2P175815            | 53072613 | A | 0 | 0 | G |
| 11 | BICF2P655613            | 53094144 | 0 | 0 | 0 | C |
| 11 | BICF2P530380            | 53096202 | A | 0 | 0 | C |
| 11 | BICF2P422536            | 53111219 | A | 0 | 0 | G |
| 11 | TIGRP2P149302_rs9148735 | 53131087 | A | 0 | 0 | C |
| 11 | BICF2S2417273           | 53160478 | G | 0 | 0 | A |
| 11 | BICF2P611830            | 53166991 | 0 | 0 | 0 | A |
| 11 | BICF2P1394904           | 53185265 | G | 0 | 0 | A |

|    |                         |          |   |   |   |   |
|----|-------------------------|----------|---|---|---|---|
| 11 | BICF2P1179462           | 53207495 | C | 0 | 0 | A |
| 11 | BICF2P659280            | 53212107 | G | 0 | 0 | A |
| 11 | BICF2P995565            | 53234287 | A | 0 | 0 | G |
| 11 | BICF2P903048            | 53254172 | G | 1 | 1 | C |
| 11 | BICF2P1414651           | 53267394 | A | 1 | 1 | G |
| 11 | BICF2S23640119          | 53272068 | 0 | 0 | 0 | G |
| 11 | BICF2S23657443          | 53284293 | C | 0 | 0 | A |
| 11 | BICF2S23041623          | 53286128 | G | 1 | 1 | A |
| 11 | BICF2P730051            | 53297234 | C | 0 | 0 | A |
| 11 | BICF2S23016136          | 53303452 | A | 0 | 0 | G |
| 11 | BICF2S2418998           | 53324258 | G | 0 | 0 | C |
| 11 | BICF2P790785            | 53326163 | 0 | 0 | 0 | A |
| 11 | BICF2S23650669          | 53373174 | T | 0 | 0 | A |
| 11 | BICF2P297619            | 53388014 | 0 | 0 | 0 | G |
| 11 | BICF2P422853            | 53419943 | A | 0 | 0 | C |
| 11 | BICF2S23158671          | 53500808 | G | 0 | 0 | A |
| 11 | BICF2P781269            | 53518976 | A | 0 | 0 | C |
| 11 | BICF2S23047912          | 53531188 | 0 | 0 | 0 | C |
| 11 | BICF2S2322372           | 53533049 | G | 0 | 0 | A |
| 11 | TIGRP2P149313_rs9115351 | 53544307 | 0 | 0 | 0 | C |
| 11 | BICF2P715691            | 53561038 | 0 | 0 | 0 | A |
| 11 | BICF2P616094            | 53578488 | A | 0 | 0 | C |
| 11 | BICF2P661427            | 53581964 | C | 0 | 0 | G |
| 11 | BICF2P1432532           | 53604701 | A | 0 | 0 | C |
| 11 | BICF2P447228            | 53652718 | A | 0 | 0 | G |
| 11 | BICF2P432272            | 53685583 | 0 | 0 | 0 | A |
| 11 | BICF2S23242561          | 53702860 | G | 0 | 0 | A |
| 11 | BICF2P23070             | 53710017 | G | 0 | 0 | A |
| 11 | BICF2S23417549          | 53744710 | 0 | 0 | 0 | A |
| 11 | BICF2P1228701           | 53807070 | A | 0 | 0 | C |
| 11 | BICF2P214021            | 53818531 | A | 0 | 0 | C |
| 11 | BICF2P477381            | 53835549 | 0 | 0 | 0 | G |
| 11 | BICF2P1009749           | 53849600 | C | 0 | 0 | A |
| 11 | TIGRP2P149316_rs8773237 | 53864266 | 0 | 0 | 0 | C |
| 11 | BICF2S23642572          | 53880623 | G | 0 | 0 | A |
| 11 | BICF2P1183453           | 53906459 | 0 | 0 | 0 | G |
| 11 | BICF2P892793            | 53941778 | A | 0 | 0 | T |
| 11 | BICF2P772508            | 53955286 | G | 1 | 1 | A |
| 11 | BICF2P1384954           | 54002917 | A | 0 | 0 | G |
| 11 | BICF2P637175            | 54006139 | A | 0 | 0 | G |
| 11 | BICF2P392585            | 54016161 | 0 | 0 | 0 | T |
| 11 | BICF2S23330011          | 54029961 | A | 0 | 0 | G |
| 11 | BICF2P1413245           | 54046914 | A | 0 | 0 | G |
| 11 | BICF2P1261843           | 54058129 | A | 0 | 0 | G |
| 11 | BICF2P667916            | 54070816 | A | 0 | 0 | G |
| 11 | BICF2P424128            | 54079329 | G | 0 | 0 | A |
| 11 | BICF2S23759970          | 54096923 | G | 0 | 0 | A |

|    |                         |          |   |   |   |   |
|----|-------------------------|----------|---|---|---|---|
| 11 | BICF2P738206            | 54127569 | 0 | 0 | 0 | G |
| 11 | BICF2P72527             | 54135065 | A | 1 | 1 | C |
| 11 | BICF2P1199185           | 54142507 | A | 0 | 0 | G |
| 11 | BICF2P471735            | 54175569 | 0 | 0 | 0 | G |
| 11 | BICF2S2399044           | 54190742 | G | 0 | 0 | A |
| 11 | BICF2S23258874          | 54199763 | G | 0 | 0 | A |
| 11 | BICF2S2447356           | 54221408 | A | 0 | 0 | G |
| 11 | BICF2P280123            | 54247307 | A | 0 | 0 | G |
| 11 | BICF2P435595            | 54268141 | A | 0 | 0 | G |
| 11 | BICF2P974065            | 54274069 | A | 1 | 1 | G |
| 11 | BICF2P1187820           | 54296922 | G | 0 | 0 | C |
| 11 | BICF2P388304            | 54316796 | G | 0 | 0 | A |
| 11 | BICF2P1442643           | 54325492 | A | 0 | 0 | G |
| 11 | BICF2S23325489          | 54329668 | A | 1 | 1 | G |
| 11 | BICF2S23652573          | 54361352 | 0 | 0 | 0 | A |
| 11 | BICF2P856402            | 54377092 | 0 | 0 | 0 | A |
| 11 | BICF2P1239567           | 54389479 | G | 0 | 0 | A |
| 11 | BICF2P1125071           | 54399857 | A | 0 | 0 | G |
| 11 | BICF2P660094            | 54414146 | C | 0 | 0 | A |
| 11 | BICF2P1212277           | 54438877 | C | 0 | 0 | G |
| 11 | BICF2G630300873         | 54451587 | A | 0 | 0 | G |
| 11 | BICF2P1100325           | 54534211 | C | 0 | 0 | A |
| 11 | BICF2P1145382           | 54566102 | A | 0 | 0 | G |
| 11 | BICF2G630301298         | 54576752 | G | 0 | 0 | A |
| 11 | BICF2S22955487          | 54600395 | C | 0 | 0 | G |
| 11 | BICF2S23746787          | 54607280 | G | 0 | 0 | A |
| 11 | TIGRP2P149492_rs8845383 | 54618327 | 0 | 0 | 0 | G |
| 11 | BICF2P962086            | 54644824 | 0 | 0 | 0 | A |
| 11 | BICF2P826164            | 54656398 | G | 0 | 0 | A |
| 11 | TIGRP2P149493_rs8956241 | 54668548 | 0 | 0 | 0 | A |
| 11 | TIGRP2P149494_rs9174881 | 54693101 | 0 | 0 | 0 | C |
| 11 | BICF2P1243559           | 54695405 | 0 | 0 | 0 | G |
| 11 | BICF2P1354233           | 54707790 | A | 0 | 0 | G |
| 11 | BICF2S23114409          | 54722306 | G | 0 | 0 | A |
| 11 | BICF2P534588            | 54737372 | C | 1 | 1 | G |
| 11 | BICF2S23332143          | 54746673 | A | 0 | 0 | T |
| 11 | TIGRP2P149505_rs8689729 | 54873099 | 0 | 0 | 0 | A |
| 11 | BICF2P949134            | 54893363 | 0 | 0 | 0 | G |
| 11 | BICF2S23249316          | 54918685 | G | 0 | 0 | A |
| 11 | BICF2P806172            | 54930293 | A | 0 | 0 | G |
| 11 | BICF2P1008860           | 54938559 | 0 | 0 | 0 | C |
| 11 | BICF2S23436883          | 54955407 | G | 0 | 0 | A |
| 11 | BICF2S23413929          | 54965895 | A | 0 | 0 | C |
| 11 | BICF2S23711094          | 54979130 | G | 1 | 1 | A |
| 11 | BICF2P595597            | 54990154 | A | 0 | 0 | G |
| 11 | BICF2S2351389           | 55026247 | A | 1 | 1 | C |
| 11 | BICF2P91280             | 55053314 | 0 | 0 | 0 | A |



|    |                         |          |   |   |   |   |
|----|-------------------------|----------|---|---|---|---|
| 11 | BICF2S23649300          | 55066365 | G | 1 | 1 | A |
| 11 | BICF2S23453392          | 55077974 | G | 1 | 1 | A |
| 11 | BICF2S23445061          | 55086854 | A | 0 | 0 | G |
| 11 | G709f51S301             | 55129797 | A | 0 | 0 | G |
| 11 | G709f54S163             | 55131056 | 0 | 0 | 0 | C |
| 11 | BICF2S23042457          | 55167659 | 0 | 0 | 0 | C |
| 11 | BICF2P126079            | 55183954 | A | 0 | 0 | C |
| 11 | TIGRP2P149509_rs8974124 | 55192874 | 0 | 0 | 0 | G |
| 11 | BICF2P1395759           | 55207131 | A | 1 | 1 | G |
| 11 | BICF2P1364813           | 55209473 | A | 1 | 1 | G |
| 11 | BICF2P931289            | 55214835 | A | 1 | 1 | C |
| 11 | BICF2P627520            | 55228797 | G | 0 | 0 | A |
| 11 | BICF2P1015744           | 55241525 | A | 1 | 1 | C |
| 11 | BICF2P1257182           | 55243793 | 0 | 0 | 0 | A |
| 11 | BICF2P1253535           | 55248320 | G | 1 | 1 | A |
| 11 | BICF2P302290            | 55258284 | A | 0 | 0 | G |
| 11 | BICF2S23651990          | 55273236 | 0 | 0 | 0 | A |
| 11 | BICF2P466438            | 55300155 | 0 | 0 | 0 | C |
| 11 | BICF2P483889            | 55312784 | 0 | 0 | 0 | G |
| 11 | BICF2P1114804           | 55315592 | 0 | 0 | 0 | G |
| 11 | BICF2S23450293          | 55335346 | 0 | 0 | 0 | A |
| 11 | BICF2S23643704          | 55341281 | 0 | 0 | 0 | A |
| 11 | BICF2P1256445           | 55368518 | A | 0 | 0 | G |
| 11 | BICF2S22918376          | 55387728 | G | 1 | 1 | A |
| 11 | BICF2P1093773           | 55399184 | A | 0 | 0 | C |
| 11 | TIGRP2P149512_rs8880209 | 55407594 | 0 | 0 | 0 | C |
| 11 | BICF2S23243782          | 55432513 | G | 1 | 1 | A |
| 11 | BICF2P1218201           | 55452657 | G | 1 | 1 | A |
| 11 | BICF2P581909            | 55460129 | 0 | 0 | 0 | C |
| 11 | BICF2P1134445           | 55471474 | A | 0 | 0 | G |
| 11 | BICF2G630301313         | 55477564 | A | 0 | 0 | G |
| 11 | BICF2P386071            | 55497603 | A | 0 | 0 | C |
| 11 | BICF2S23247414          | 55500542 | G | 0 | 0 | C |
| 11 | BICF2P783032            | 55528487 | C | 0 | 0 | A |
| 11 | BICF2P95084             | 55536949 | C | 0 | 0 | A |
| 11 | BICF2S2316320           | 55571399 | A | 0 | 0 | G |
| 11 | BICF2P912477            | 55585627 | G | 0 | 0 | A |
| 11 | G710f35S261             | 55604036 | A | 0 | 0 | G |
| 11 | BICF2P358280            | 55630796 | 0 | 0 | 0 | A |
| 11 | BICF2P119727            | 55667844 | G | 0 | 0 | A |
| 11 | BICF2P218090            | 55672611 | G | 1 | 1 | A |
| 11 | BICF2P482720            | 55691973 | G | 1 | 1 | A |
| 11 | BICF2S23118240          | 55700341 | A | 0 | 0 | G |
| 11 | BICF2P870304            | 55704360 | G | 1 | 1 | A |
| 11 | BICF2P870305            | 55706395 | G | 1 | 1 | A |
| 11 | BICF2P477633            | 55719287 | A | 1 | 1 | G |
| 11 | BICF2P687630            | 55747598 | A | 1 | 1 | C |

|    |                         |          |   |   |   |   |
|----|-------------------------|----------|---|---|---|---|
| 11 | BICF2S22963793          | 55752508 | G | 1 | 1 | A |
| 11 | BICF2S23660598          | 55765644 | G | 0 | 0 | A |
| 11 | G711f45S76              | 55809049 | A | 1 | 1 | G |
| 11 | BICF2S23154509          | 55833730 | A | 0 | 0 | G |
| 11 | BICF2P546761            | 55940453 | 0 | 0 | 0 | T |
| 11 | G713f30S184             | 55980131 | G | 0 | 0 | A |
| 11 | BICF2P715936            | 56008800 | A | 0 | 0 | G |
| 11 | BICF2P1295013           | 56030477 | A | 0 | 0 | G |
| 11 | BICF2P862694            | 56045996 | A | 0 | 0 | G |
| 11 | BICF2P982804            | 56061180 | C | 0 | 0 | A |
| 11 | BICF2P155141            | 56063695 | A | 0 | 0 | C |
| 11 | BICF2P1146396           | 56080120 | G | 0 | 0 | A |
| 11 | BICF2P387961            | 56094569 | C | 0 | 0 | A |
| 11 | BICF2P268806            | 56107179 | G | 0 | 0 | A |
| 11 | BICF2P103819            | 56116672 | A | 0 | 0 | G |
| 11 | BICF2P795225            | 56120789 | A | 0 | 0 | G |
| 11 | BICF2P32044             | 56137876 | T | 0 | 0 | A |
| 11 | BICF2P32049             | 56138994 | A | 0 | 0 | G |
| 11 | BICF2P1154270           | 56163280 | G | 0 | 0 | A |
| 11 | BICF2P1248770           | 56166597 | G | 0 | 0 | A |
| 11 | BICF2P592493            | 56178951 | G | 0 | 0 | A |
| 11 | BICF2P868938            | 56207077 | 0 | 0 | 0 | C |
| 11 | TIGRP2P149576_rs8992846 | 56226392 | 0 | 0 | 0 | G |
| 11 | BICF2S2348309           | 56244446 | A | 0 | 0 | G |
| 11 | BICF2P1271639           | 56246551 | G | 0 | 0 | A |
| 11 | BICF2S22963047          | 56263450 | A | 1 | 1 | G |
| 11 | BICF2S23356536          | 56291317 | G | 0 | 0 | A |
| 11 | BICF2S24512143          | 56299400 | 0 | 0 | 0 | T |
| 11 | BICF2P1337317           | 56316714 | G | 0 | 0 | A |
| 11 | BICF2P740918            | 56329893 | A | 0 | 0 | G |
| 11 | BICF2P381953            | 56349348 | A | 0 | 0 | G |
| 11 | BICF2P149554            | 56356001 | G | 0 | 0 | A |
| 11 | BICF2P152356            | 56362544 | A | 1 | 1 | G |
| 11 | BICF2S23118223          | 56377400 | G | 0 | 0 | A |
| 11 | BICF2S24115875          | 56386440 | C | 0 | 0 | A |
| 11 | TIGRP2P149581_rs8908933 | 56398495 | 0 | 0 | 0 | A |
| 11 | BICF2S2361917           | 56413396 | C | 1 | 1 | A |
| 11 | BICF2S23260716          | 56427282 | G | 0 | 0 | A |
| 11 | BICF2P844655            | 56461991 | 0 | 0 | 0 | A |
| 11 | BICF2S23220226          | 56480308 | G | 0 | 0 | A |
| 11 | BICF2P693837            | 56506042 | 0 | 0 | 0 | C |
| 11 | BICF2P381074            | 56519561 | 0 | 0 | 0 | G |
| 11 | BICF2S23019795          | 56529480 | C | 0 | 0 | A |
| 11 | BICF2S23129791          | 56535777 | C | 0 | 0 | A |
| 11 | BICF2S2365240           | 56559320 | 0 | 0 | 0 | G |
| 11 | BICF2S2341209           | 56591149 | A | 0 | 0 | G |
| 11 | BICF2P505824            | 56605414 | 0 | 0 | 0 | C |

|    |                         |          |   |   |   |   |
|----|-------------------------|----------|---|---|---|---|
| 11 | BICF2S2305829           | 56619845 | A | 0 | 0 | G |
| 11 | BICF2S23234959          | 56631125 | C | 0 | 0 | G |
| 11 | BICF2P1042761           | 56671495 | 0 | 0 | 0 | G |
| 11 | BICF2S23019225          | 56687671 | T | 0 | 0 | A |
| 11 | TIGRP2P150167_rs8726474 | 56698433 | 0 | 0 | 0 | G |
| 11 | BICF2S23547355          | 56710322 | A | 0 | 0 | C |
| 11 | BICF2P920645            | 56724853 | C | 0 | 0 | G |
| 11 | BICF2S2414003           | 56732345 | C | 1 | 1 | A |
| 11 | BICF2S23438390          | 56761908 | G | 1 | 1 | A |
| 11 | BICF2S23438525          | 56765064 | G | 1 | 1 | A |
| 11 | TIGRP2P150168_rs8820303 | 56792885 | 0 | 0 | 0 | C |
| 11 | BICF2P36149             | 56827680 | A | 1 | 1 | G |
| 11 | BICF2S23642526          | 56839514 | A | 0 | 0 | G |
| 11 | BICF2P1140002           | 56883534 | A | 0 | 0 | G |
| 11 | BICF2P1309525           | 56945751 | 0 | 0 | 0 | A |
| 11 | BICF2S23528533          | 56953968 | C | 0 | 0 | A |
| 11 | BICF2P473195            | 57032893 | G | 0 | 0 | A |
| 11 | BICF2S23633992          | 57045584 | A | 0 | 0 | C |
| 11 | BICF2S2442659           | 57096892 | 0 | 0 | 0 | A |
| 11 | BICF2P553050            | 57102348 | 0 | 0 | 0 | A |
| 11 | BICF2P201651            | 57115404 | A | 0 | 0 | G |
| 11 | BICF2P1215923           | 57129227 | A | 0 | 0 | G |
| 11 | BICF2S23057454          | 57132554 | A | 0 | 0 | C |
| 11 | BICF2S22934314          | 57147508 | G | 0 | 0 | A |
| 11 | BICF2P531926            | 57160450 | 0 | 0 | 0 | A |
| 11 | BICF2P194734            | 57184707 | A | 0 | 0 | G |
| 11 | BICF2P150808            | 57201677 | A | 0 | 0 | C |
| 11 | BICF2P756578            | 57215661 | 0 | 0 | 0 | G |
| 11 | BICF2P1241588           | 57224260 | A | 0 | 0 | G |
| 11 | BICF2P1415334           | 57244368 | C | 0 | 0 | A |
| 11 | BICF2P381660            | 57249000 | G | 0 | 0 | A |
| 11 | BICF2P818075            | 57260953 | C | 0 | 0 | A |
| 11 | BICF2S235577            | 57279127 | G | 0 | 0 | A |
| 11 | BICF2P752610            | 57290378 | G | 0 | 0 | A |
| 11 | BICF2P1040099           | 57297351 | A | 0 | 0 | G |
| 11 | BICF2P1014840           | 57311961 | A | 0 | 0 | G |
| 11 | BICF2P836542            | 57321889 | A | 0 | 0 | G |
| 11 | BICF2P31046             | 57329046 | G | 0 | 0 | A |
| 11 | BICF2P436434            | 57346227 | A | 0 | 0 | G |
| 11 | BICF2P1041176           | 57353092 | A | 0 | 0 | G |
| 11 | BICF2S23337897          | 57376306 | A | 0 | 0 | G |
| 11 | BICF2P1084386           | 57389398 | 0 | 0 | 0 | C |
| 11 | BICF2S22915080          | 57397026 | G | 0 | 0 | A |
| 11 | BICF2P683041            | 57410147 | A | 0 | 0 | C |
| 11 | BICF2S2309166           | 57418068 | G | 0 | 0 | A |
| 11 | BICF2P352755            | 57419846 | G | 0 | 0 | A |
| 11 | BICF2P1252126           | 57424170 | C | 0 | 0 | G |

|    |                         |          |   |   |        |   |
|----|-------------------------|----------|---|---|--------|---|
| 11 | BICF2P995730            | 57437770 | G | 0 | 0      | A |
| 11 | BICF2P661028            | 57444886 | T | 0 | 0      | A |
| 11 | BICF2S22946523          | 57450192 | G | 0 | 0      | A |
| 11 | BICF2P630124            | 57458186 | G | 1 | 0.7143 | A |
| 11 | BICF2P832137            | 57475353 | G | 0 | 0      | A |
| 11 | BICF2P761921            | 57480804 | A | 0 | 0      | G |
| 11 | BICF2P4731              | 57491760 | C | 0 | 0      | A |
| 11 | BICF2P631700            | 57500057 | G | 0 | 0      | A |
| 11 | BICF2S23432141          | 57517455 | G | 0 | 0      | A |
| 11 | BICF2P892696            | 57529881 | 0 | 0 | 0      | G |
| 11 | BICF2P1323603           | 57541047 | A | 0 | 0      | G |
| 11 | TIGRP2P150231_rs8498546 | 57549648 | 0 | 0 | 0      | A |
| 11 | TIGRP2P150232_rs8848490 | 57561267 | 0 | 0 | 0      | G |
| 11 | BICF2S23019665          | 57579230 | G | 0 | 0.2857 | A |
| 11 | BICF2P1248668           | 57598272 | 0 | 0 | 0      | A |
| 11 | BICF2S23257510          | 57620315 | A | 1 | 0.7143 | G |
| 11 | BICF2P267484            | 57650778 | 0 | 0 | 0      | A |
| 11 | BICF2P1212187           | 57675169 | 0 | 0 | 0      | A |
| 11 | BICF2S22956720          | 57691567 | C | 1 | 0.7143 | A |
| 11 | BICF2S22956721          | 57691659 | A | 1 | 0.7143 | C |
| 11 | BICF2S241610            | 57699911 | A | 0 | 0.2857 | G |
| 11 | BICF2S23246736          | 57709630 | A | 1 | 1      | G |
| 11 | BICF2P332937            | 57724943 | G | 0 | 0      | A |
| 11 | BICF2S22964973          | 57749340 | A | 1 | 1      | G |
| 11 | BICF2S22960086          | 57764338 | G | 0 | 0      | A |
| 11 | BICF2S23756393          | 57765281 | C | 0 | 0      | A |
| 11 | BICF2S23756395          | 57765589 | A | 0 | 0      | G |
| 11 | BICF2S22943912          | 57809689 | C | 0 | 0      | A |
| 11 | BICF2S232456            | 57811925 | 0 | 0 | 0      | G |
| 11 | BICF2P999995            | 57836375 | A | 1 | 0.7143 | G |
| 11 | BICF2P703710            | 57864621 | 0 | 0 | 0      | G |
| 11 | BICF2S23435826          | 57869540 | G | 0 | 0      | A |
| 11 | BICF2P879418            | 57879514 | 0 | 0 | 0      | C |
| 11 | BICF2P275615            | 57895041 | 0 | 0 | 0      | G |
| 11 | BICF2S23118925          | 57913651 | A | 0 | 0      | G |
| 11 | BICF2S23517705          | 57921078 | A | 0 | 0      | G |
| 11 | BICF2S23018057          | 57950406 | 0 | 0 | 0      | A |
| 11 | BICF2S23141869          | 57973544 | G | 0 | 0      | A |
| 11 | BICF2P760556            | 58002809 | 0 | 0 | 0      | C |
| 11 | BICF2S23113984          | 58006310 | C | 0 | 0      | G |
| 11 | BICF2S22950933          | 58026036 | G | 0 | 0      | A |
| 11 | TIGRP2P150242_rs9211208 | 58030654 | 0 | 0 | 0      | G |
| 11 | BICF2S23222414          | 58044219 | G | 1 | 1      | A |
| 11 | BICF2S2339072           | 58059159 | A | 1 | 1      | C |
| 11 | BICF2P1053788           | 58065598 | G | 0 | 0      | A |
| 11 | BICF2P628645            | 58077495 | A | 1 | 0.7143 | G |
| 11 | BICF2P1375586           | 58096422 | 0 | 0 | 0      | A |

|    |                         |          |   |     |        |   |
|----|-------------------------|----------|---|-----|--------|---|
| 11 | BICF2P1172380           | 58104024 | A | 1   | 0.7143 | G |
| 11 | BICF2P78414             | 58113328 | A | 1   | 0.7143 | C |
| 11 | BICF2P1117272           | 58136553 | A | 1   | 0.7143 | G |
| 11 | BICF2S23734200          | 58149118 | G | 1   | 0.7143 | A |
| 11 | BICF2P1384665           | 58160390 | G | 1   | 0.7143 | A |
| 11 | BICF2P1047879           | 58166816 | C | 1   | 0.7143 | G |
| 11 | BICF2P471203            | 58170361 | C | 0   | 0.2857 | A |
| 11 | BICF2P278568            | 58179902 | G | 1   | 0.7143 | A |
| 11 | BICF2S23435499          | 58195009 | A | 1   | 1      | C |
| 11 | BICF2P6649              | 58204638 | 0 | 0   | 0      | G |
| 11 | TIGRP2P150248_rs8652846 | 58214452 | 0 | 0   | 0      | G |
| 11 | BICF2S22960253          | 58224558 | G | 0   | 0      | A |
| 11 | BICF2P453433            | 58245601 | A | 0   | 0      | T |
| 11 | BICF2P862026            | 58254418 | A | 0   | 0      | G |
| 11 | BICF2P376563            | 58260706 | A | 0   | 0      | G |
| 11 | BICF2P350522            | 58274682 | G | 0   | 0      | A |
| 11 | BICF2P1351119           | 58285752 | A | 0   | 0      | G |
| 11 | BICF2P551015            | 58309160 | 0 | 0   | 0      | G |
| 11 | BICF2S23648925          | 58333175 | A | 0   | 0      | T |
| 11 | BICF2P1343522           | 58347609 | A | 1   | 1      | G |
| 11 | BICF2P1049455           | 58359006 | C | 1   | 0.7143 | G |
| 11 | BICF2P625420            | 58371682 | 0 | 0   | 0      | G |
| 11 | BICF2S22921925          | 58377984 | A | 0.5 | 0.2857 | C |
| 11 | BICF2S23118349          | 58389087 | C | 0   | 0      | A |
| 11 | BICF2P1219469           | 58418047 | 0 | 0   | 0      | C |
| 11 | BICF2P637856            | 58424851 | 0 | 0   | 0      | C |
| 11 | BICF2S23336725          | 58449835 | A | 0.5 | 0.4286 | G |
| 11 | BICF2S23647328          | 58460552 | T | 0   | 0      | A |
| 11 | BICF2P175878            | 58476103 | A | 1   | 0.7143 | G |
| 11 | BICF2P1310827           | 58477636 | G | 1   | 0.7143 | A |
| 11 | BICF2P1045956           | 58479716 | G | 1   | 0.7143 | A |
| 11 | BICF2P736708            | 58492825 | A | 0   | 0      | G |
| 11 | BICF2P981077            | 58502606 | C | 0.5 | 0.4286 | A |
| 11 | BICF2P133599            | 58525342 | A | 1   | 0.7143 | G |
| 11 | BICF2S23654079          | 58537517 | A | 1   | 0.7143 | G |
| 11 | BICF2S23025910          | 58553223 | A | 1   | 1      | G |
| 11 | BICF2S23651434          | 58561049 | A | 1   | 1      | G |
| 11 | BICF2P161687            | 58591484 | G | 0   | 0      | C |
| 11 | BICF2S23634646          | 58604294 | A | 0   | 0      | G |
| 11 | BICF2S22963386          | 58666558 | A | 0   | 0      | G |
| 11 | BICF2P730850            | 58678470 | A | 0   | 0      | G |
| 11 | BICF2S23145467          | 58695144 | A | 0.5 | 0.2857 | G |
| 11 | BICF2S23112224          | 58704432 | G | 0.5 | 0.5714 | A |
| 11 | BICF2P1299647           | 58707790 | A | 0   | 0      | G |
| 11 | BICF2P542346            | 58724919 | A | 1   | 1      | G |
| 11 | BICF2P567976            | 58730592 | G | 1   | 1      | A |
| 11 | BICF2S23655668          | 58753036 | A | 1   | 1      | T |

|    |                |          |   |     |        |   |
|----|----------------|----------|---|-----|--------|---|
| 11 | BICF2S23656408 | 58757722 | G | 0   | 0.2857 | A |
| 11 | BICF2S2448390  | 58765347 | G | 0   | 0      | A |
| 11 | BICF2S2335024  | 58784386 | G | 1   | 1      | A |
| 11 | BICF2P828383   | 58793046 | A | 0   | 0      | G |
| 11 | BICF2P443971   | 58801630 | A | 0.5 | 0.7143 | G |
| 11 | BICF2P881809   | 58811467 | A | 0.5 | 0.2857 | G |
| 11 | BICF2P518727   | 58823928 | G | 0.5 | 0.5714 | A |
| 11 | BICF2P453053   | 58841542 | C | 0   | 0      | A |
| 11 | BICF2P35873    | 58846330 | A | 0   | 0      | G |
| 11 | BICF2P314191   | 58867916 | 0 | 0   | 0      | G |
| 11 | BICF2S2345871  | 58870622 | A | 0   | 0.2857 | C |
| 11 | BICF2S23655961 | 58883702 | G | 0   | 0.2857 | A |
| 11 | BICF2P486449   | 58900877 | A | 0   | 0.2857 | G |
| 11 | BICF2P622643   | 58915024 | G | 1   | 0.7143 | A |
| 11 | BICF2P305527   | 58926648 | A | 1   | 1      | G |
| 11 | BICF2P517086   | 58943615 | A | 0   | 0.2857 | G |
| 11 | BICF2P51913    | 58968416 | C | 0.5 | 0.5714 | A |
| 11 | BICF2P314199   | 58978311 | A | 0.5 | 0.2857 | G |
| 11 | BICF2P1353304  | 58992466 | C | 0.5 | 0.5714 | A |
| 11 | BICF2P1353308  | 58993804 | G | 0.5 | 0.2857 | A |
| 11 | BICF2S23316102 | 59004863 | A | 1   | 1      | G |
| 11 | BICF2S23316103 | 59005051 | A | 1   | 1      | G |
| 11 | BICF2S23318835 | 59008611 | A | 1   | 1      | G |
| 11 | BICF2P945931   | 59022041 | A | 0.5 | 0.5714 | G |
| 11 | BICF2S23618096 | 59029843 | G | 0   | 0.2857 | A |
| 11 | BICF2P1252366  | 59043779 | A | 0   | 0      | G |
| 11 | BICF2S23218356 | 59054858 | C | 0   | 0      | A |
| 11 | BICF2S24413049 | 59068399 | 0 | 0   | 0      | C |
| 11 | BICF2P1111366  | 59080665 | G | 0   | 0.2857 | A |
| 11 | BICF2S23527635 | 59095909 | A | 0   | 0.2857 | G |
| 11 | BICF2P236811   | 59104369 | G | 0   | 0.2857 | A |
| 11 | BICF2S23052810 | 59110805 | A | 0   | 0.2857 | C |
| 11 | BICF2P201769   | 59135266 | A | 0   | 0      | G |
| 11 | BICF2P899267   | 59152993 | A | 1   | 0.7143 | G |
| 11 | BICF2P949706   | 59158957 | 0 | 0   | 0      | G |
| 11 | BICF2P211675   | 59169119 | A | 0   | 0      | G |
| 11 | BICF2P7371     | 59179546 | G | 1   | 1      | A |
| 11 | BICF2P1277100  | 59194378 | A | 0.5 | 0.2857 | C |
| 11 | BICF2S23650067 | 59202654 | G | 0   | 0.2857 | A |
| 11 | BICF2P197455   | 59215219 | A | 0   | 0.2857 | G |
| 11 | BICF2P1135816  | 59227045 | A | 0   | 0.2857 | G |
| 11 | BICF2P611845   | 59239945 | A | 0   | 0.2857 | G |
| 11 | BICF2P1272336  | 59252317 | G | 0   | 0.2857 | A |
| 11 | BICF2P129432   | 59268112 | C | 0   | 0      | G |
| 11 | BICF2P1348969  | 59277805 | G | 0.5 | 0.2857 | A |
| 11 | BICF2P1313850  | 59286507 | C | 0   | 0      | A |
| 11 | BICF2P174156   | 59300071 | A | 0   | 0      | C |

|    |                 |          |   |     |        |   |
|----|-----------------|----------|---|-----|--------|---|
| 11 | BICF2S2336642   | 59316903 | G | 1   | 1      | A |
| 11 | BICF2P339463    | 59325717 | G | 0   | 0      | A |
| 11 | BICF2S22963749  | 59337139 | A | 0   | 0      | G |
| 11 | BICF2P1385469   | 59345873 | A | 0   | 0      | G |
| 11 | BICF2P1289121   | 59356295 | G | 0   | 0      | A |
| 11 | BICF2P345495    | 59363648 | G | 0.5 | 0.4286 | A |
| 11 | BICF2P447533    | 59381572 | G | 0.5 | 0.7143 | A |
| 11 | BICF2S23739951  | 59393395 | A | 0   | 0      | G |
| 11 | BICF2P1053202   | 59400580 | A | 1   | 1      | G |
| 11 | BICF2P1070708   | 59410645 | A | 0   | 0      | G |
| 11 | BICF2P1070700   | 59411402 | G | 0   | 0      | A |
| 11 | BICF2G630301374 | 59423600 | G | 0   | 0.2857 | A |
| 11 | BICF2G630301378 | 59436022 | G | 0.5 | 0.4286 | A |
| 11 | BICF2S23612332  | 59450485 | A | 0.5 | 0.25   | G |
| 11 | BICF2G630301384 | 59466043 | A | 0.5 | 0.2857 | G |
| 11 | BICF2G630301394 | 59474365 | G | 0.5 | 0.5    | A |
| 11 | BICF2G630301427 | 59488115 | A | 0.5 | 0.4286 | G |
| 11 | BICF2G630301433 | 59490726 | A | 0.5 | 0.2857 | G |
| 11 | BICF2G630301445 | 59501622 | G | 0   | 0.2857 | A |
| 11 | BICF2G630301454 | 59516189 | A | 0   | 0.2857 | G |
| 11 | BICF2G630301462 | 59530464 | G | 0.5 | 0.7143 | A |
| 11 | BICF2G630301466 | 59536678 | A | 0.5 | 0.25   | C |
| 11 | BICF2P462051    | 59550120 | G | 0   | 0      | A |
| 11 | BICF2G630301476 | 59559396 | A | 0   | 0      | C |
| 11 | BICF2P1416724   | 59581150 | T | 0.5 | 0.7143 | A |
| 11 | BICF2P198572    | 59588708 | 0 | 0   | 0      | G |
| 11 | BICF2G630301499 | 59595781 | A | 0   | 0      | G |
| 11 | BICF2G630301540 | 59618531 | G | 0.5 | 0.2857 | A |
| 11 | BICF2G630301565 | 59630312 | G | 0   | 0      | A |
| 11 | BICF2G630301592 | 59645562 | G | 0   | 0      | A |
| 11 | G716f42S197     | 59682151 | G | 0   | 0      | A |
| 11 | BICF2G630301604 | 59737797 | A | 0.5 | 0.5714 | G |
| 11 | BICF2G630301605 | 59745218 | A | 0   | 0.2857 | G |
| 11 | BICF2P1148879   | 59775576 | G | 0.5 | 0.5714 | A |
| 11 | BICF2P800182    | 59782358 | 0 | 0   | 0      | A |
| 11 | BICF2P1090078   | 59793408 | G | 0   | 0      | A |
| 11 | BICF2P1355101   | 59801688 | T | 0   | 0      | A |
| 11 | BICF2P359835    | 59812326 | G | 0   | 0      | A |
| 11 | BICF2P866429    | 59832234 | A | 0   | 0      | G |
| 11 | BICF2G630301611 | 59856338 | G | 1   | 0.7143 | A |
| 11 | BICF2G630301614 | 59862348 | A | 0.5 | 0.2857 | G |
| 11 | BICF2G630301620 | 59874134 | A | 0   | 0      | G |
| 11 | BICF2G630301624 | 59883903 | A | 0   | 0.2857 | C |
| 11 | BICF2G630301636 | 59889682 | C | 0   | 0.2857 | A |
| 11 | BICF2S23035805  | 59897924 | G | 0.5 | 0.4286 | A |
| 11 | BICF2G630301639 | 59906022 | A | 0   | 0      | G |
| 11 | BICF2G630301655 | 59926261 | A | 0   | 0      | G |

|    |                 |          |   |     |        |   |
|----|-----------------|----------|---|-----|--------|---|
| 11 | BICF2P171803    | 59958535 | 0 | 0   | 0      | A |
| 11 | BICF2P858178    | 59966128 | 0 | 0   | 0      | A |
| 11 | BICF2S23044578  | 59976585 | C | 0.5 | 0.5714 | A |
| 11 | BICF2S23549996  | 59985654 | G | 0.5 | 0.5714 | A |
| 11 | BICF2S23447977  | 60001828 | T | 0.5 | 0.4286 | A |
| 11 | BICF2G630301658 | 60025764 | G | 0   | 0      | A |
| 11 | BICF2G630301659 | 60036664 | 0 | 0   | 0      | G |
| 11 | BICF2G630301661 | 60058140 | 0 | 0   | 0      | A |
| 11 | BICF2G630301663 | 60072472 | A | 0.5 | 0.7143 | G |
| 11 | BICF2G630301668 | 60082577 | A | 0   | 0.2857 | G |
| 11 | BICF2S23415362  | 60090196 | A | 0   | 0.2857 | G |
| 11 | BICF2G630301690 | 60105602 | A | 0   | 0.2857 | G |
| 11 | BICF2G630301703 | 60113728 | C | 0   | 0.2857 | A |
| 11 | BICF2G630301719 | 60122803 | A | 0   | 0.2857 | G |
| 11 | BICF2P24585     | 60144974 | G | 0.5 | 0.7143 | A |
| 11 | BICF2G630301744 | 60156181 | A | 0   | 0      | G |
| 11 | BICF2G630301746 | 60156813 | A | 0   | 0      | G |
| 11 | BICF2G630301762 | 60176894 | A | 0   | 0.2857 | T |
| 11 | BICF2P757041    | 60180557 | C | 0   | 0.2857 | G |
| 11 | BICF2P369385    | 60199341 | G | 0   | 0.2857 | A |
| 11 | BICF2P1302920   | 60203554 | A | 0   | 0.25   | G |
| 11 | BICF2G630301766 | 60223036 | C | 0   | 0      | A |
| 11 | BICF2P723618    | 60229783 | G | 0   | 0.2857 | A |
| 11 | BICF2P796456    | 60239028 | G | 0   | 0.2857 | A |
| 11 | BICF2P654458    | 60251003 | C | 0   | 0.2857 | A |
| 11 | BICF2P249655    | 60265851 | A | 0   | 0.2857 | G |
| 11 | BICF2P468149    | 60288293 | G | 0   | 0.2857 | A |
| 11 | BICF2P28354     | 60299180 | A | 0   | 0.2857 | G |
| 11 | BICF2P419681    | 60309060 | A | 0   | 0.2857 | G |
| 11 | BICF2G630301773 | 60319951 | G | 0   | 0      | A |
| 11 | BICF2G630301790 | 60334530 | G | 0   | 0      | A |
| 11 | BICF2P263166    | 60342920 | A | 0   | 0.2857 | G |
| 11 | BICF2P745670    | 60355709 | G | 0   | 0.2857 | A |
| 11 | BICF2S23022653  | 60366483 | A | 0   | 0      | G |
| 11 | BICF2P564441    | 60380107 | C | 0   | 0      | A |
| 11 | BICF2P838085    | 60395167 | A | 0   | 0      | G |
| 11 | BICF2P1228584   | 60401767 | A | 0   | 0.2857 | G |
| 11 | BICF2P898674    | 60407705 | A | 0   | 0      | G |
| 11 | BICF2P200118    | 60414304 | A | 0   | 0.2857 | G |
| 11 | BICF2P451518    | 60421740 | 0 | 0   | 0      | G |
| 11 | BICF2G630301823 | 60439699 | A | 0   | 0      | G |
| 11 | BICF2S24317378  | 60453035 | G | 1   | 0.7143 | A |
| 11 | BICF2G630301833 | 60457262 | G | 1   | 0.7143 | A |
| 11 | BICF2G630301838 | 60469038 | A | 0.5 | 0.2857 | C |
| 11 | BICF2S23722734  | 60486995 | A | 0.5 | 0.4167 | C |
| 11 | BICF2G630301850 | 60494409 | G | 0.5 | 0.2857 | A |
| 11 | BICF2P615340    | 60495499 | G | 0   | 0.2857 | C |



|    |                         |          |   |     |        |   |
|----|-------------------------|----------|---|-----|--------|---|
| 11 | BICF2G630301856         | 60501590 | A | 0.5 | 0.2857 | T |
| 11 | BICF2P128276            | 60516305 | A | 0   | 0.2857 | G |
| 11 | BICF2P628690            | 60516868 | A | 0   | 0.2857 | G |
| 11 | BICF2G630301872         | 60524366 | T | 0   | 0      | A |
| 11 | BICF2G630301874         | 60530836 | A | 0.5 | 0.2857 | G |
| 11 | BICF2G630301882         | 60537529 | A | 0.5 | 0.2857 | G |
| 11 | BICF2G630301901         | 60565859 | G | 0   | 0      | A |
| 11 | BICF2P1168374           | 60576781 | 0 | 0   | 0      | A |
| 11 | BICF2G630301903         | 60590873 | 0 | 0   | 0      | G |
| 11 | G717f33S96              | 60616005 | 0 | 0   | 0      | C |
| 11 | BICF2P871046            | 60619334 | 0 | 0   | 0      | A |
| 11 | TIGRP2P150279_rs8906774 | 60695570 | 0 | 0   | 0      | T |
| 11 | BICF2G630301917         | 60702455 | C | 0.5 | 0.2857 | A |
| 11 | BICF2G630301919         | 60711085 | G | 0   | 0      | A |
| 11 | BICF2G630301923         | 60725161 | A | 0.5 | 0.2857 | G |
| 11 | BICF2G630301931         | 60732704 | A | 0   | 0      | C |
| 11 | BICF2G630301939         | 60751895 | C | 0   | 0      | A |
| 11 | BICF2G630301945         | 60760668 | C | 0   | 0      | A |
| 11 | BICF2G630301953         | 60766981 | A | 0   | 0      | G |
| 11 | BICF2G630301968         | 60779477 | A | 0   | 0      | G |
| 11 | BICF2G630301972         | 60789299 | A | 0   | 0      | G |
| 11 | BICF2G630301986         | 60810683 | C | 0   | 0      | A |
| 11 | BICF2G630301987         | 60813549 | A | 0   | 0      | C |
| 11 | BICF2P145002            | 60829735 | G | 0.5 | 0.2857 | A |
| 11 | BICF2G630302000         | 60838978 | G | 0   | 0      | A |
| 11 | BICF2G630302013         | 60851577 | G | 0   | 0      | A |
| 11 | BICF2G630302024         | 60860349 | G | 0.5 | 0.2857 | C |
| 11 | BICF2G630302047         | 60870117 | A | 0   | 0      | G |
| 11 | BICF2S23720072          | 60889263 | G | 0.5 | 0.2857 | A |
| 11 | BICF2P493492            | 60895875 | A | 0.5 | 0.2857 | G |
| 11 | BICF2P1293660           | 60904819 | A | 0   | 0      | G |
| 11 | BICF2G630302123         | 60925814 | G | 0   | 0      | A |
| 11 | BICF2G630302126         | 60928888 | G | 0   | 0      | A |
| 11 | BICF2G630302147         | 60939848 | A | 0.5 | 0.2857 | C |
| 11 | BICF2P1140301           | 60957813 | G | 0   | 0      | A |
| 11 | BICF2G630302182         | 60971704 | C | 0.5 | 0.2857 | G |
| 11 | BICF2G630302183         | 60971760 | G | 0.5 | 0.2857 | A |
| 11 | BICF2P405127            | 60981048 | A | 1   | 0.75   | C |
| 11 | BICF2G630302202         | 60986605 | A | 0   | 0      | G |
| 11 | BICF2P603789            | 61005055 | G | 0   | 0.2857 | A |
| 11 | BICF2G630302242         | 61021140 | A | 0   | 0.2857 | G |
| 11 | BICF2S23754200          | 61033448 | A | 0   | 0      | G |
| 11 | BICF2G630302263         | 61043928 | A | 0   | 0      | G |
| 11 | BICF2G630302283         | 61057312 | G | 0   | 0      | A |
| 11 | BICF2G630302285         | 61071397 | G | 0   | 0      | A |
| 11 | BICF2G630302290         | 61079229 | G | 0   | 0.2857 | A |
| 11 | BICF2P873622            | 61095104 | G | 0   | 0      | A |

|    |                 |          |   |     |        |   |
|----|-----------------|----------|---|-----|--------|---|
| 11 | BICF2S23446084  | 61106521 | G | 0   | 0      | A |
| 11 | BICF2G630302306 | 61113255 | 0 | 0   | 0      | A |
| 11 | BICF2G630302307 | 61129159 | 0 | 0   | 0      | C |
| 11 | BICF2S23223545  | 61156541 | G | 0.5 | 0.2857 | A |
| 11 | BICF2G630302331 | 61160402 | C | 0   | 0.2857 | A |
| 11 | BICF2G630302351 | 61169939 | A | 0   | 0.2857 | C |
| 11 | BICF2G630302352 | 61174233 | G | 0   | 0.2857 | A |
| 11 | BICF2G630302356 | 61190060 | G | 0   | 0.2857 | A |
| 11 | BICF2G630302368 | 61194786 | A | 0   | 0      | G |
| 11 | BICF2P1063190   | 61205073 | A | 0   | 0.2857 | G |
| 11 | BICF2P940896    | 61215654 | G | 1   | 0.7143 | A |
| 11 | BICF2P684919    | 61227435 | G | 0   | 0      | A |
| 11 | BICF2G630302393 | 61242502 | A | 0   | 0      | G |
| 11 | BICF2G630302407 | 61265602 | G | 0.5 | 0.4286 | A |
| 11 | BICF2P359467    | 61273637 | A | 0.5 | 0.7143 | G |
| 11 | BICF2G630302417 | 61299959 | G | 0.5 | 0.7143 | A |
| 11 | BICF2S2317919   | 61307474 | A | 0   | 0      | G |
| 11 | BICF2S23110572  | 61321902 | A | 0   | 0      | G |
| 11 | BICF2G630302458 | 61330267 | A | 0   | 0      | G |
| 11 | BICF2G630302488 | 61341588 | A | 0   | 0      | C |
| 11 | BICF2P1350151   | 61363681 | A | 0   | 0      | T |
| 11 | BICF2G630302548 | 61372973 | A | 0   | 0      | G |
| 11 | BICF2G630302559 | 61381491 | G | 0   | 0      | A |
| 11 | BICF2S23141993  | 61391301 | A | 0   | 0      | T |
| 11 | BICF2G630302605 | 61397029 | 0 | 0   | 0      | T |
| 11 | BICF2G630302609 | 61401079 | A | 0   | 0      | C |
| 11 | BICF2P815744    | 61413940 | G | 1   | 1      | A |
| 11 | BICF2P815753    | 61414660 | G | 1   | 1      | A |
| 11 | BICF2G630302622 | 61422996 | C | 1   | 1      | A |
| 11 | BICF2S23134972  | 61435254 | G | 1   | 1      | A |
| 11 | BICF2G630302628 | 61449765 | G | 0   | 0      | A |
| 11 | BICF2G630302636 | 61456504 | G | 0   | 0.2857 | A |
| 11 | BICF2G630302651 | 61469468 | A | 0   | 0      | C |
| 11 | BICF2P378373    | 61479835 | 0 | 0   | 0      | G |
| 11 | BICF2P1378754   | 61492902 | 0 | 0   | 0      | G |
| 11 | BICF2S2311442   | 61517461 | 0 | 0   | 0      | G |
| 11 | BICF2S2362555   | 61552912 | A | 1   | 0.7143 | G |
| 11 | BICF2S22959009  | 61576119 | G | 0   | 0      | A |
| 11 | BICF2S22958866  | 61580558 | A | 1   | 0.7143 | G |
| 11 | BICF2S23617550  | 61585254 | C | 0   | 0      | A |
| 11 | BICF2P382756    | 61597148 | 0 | 0   | 0      | A |
| 11 | BICF2P456166    | 61605878 | 0 | 0   | 0      | C |
| 11 | BICF2P1293007   | 61625024 | 0 | 0   | 0      | A |
| 11 | BICF2G630302673 | 61638067 | A | 0   | 0.2857 | G |
| 11 | BICF2P820985    | 61644238 | 0 | 0   | 0      | A |
| 11 | BICF2G630302693 | 61654134 | C | 0   | 0      | A |
| 11 | BICF2S2449675   | 61666729 | G | 0   | 0      | A |

|    |                         |          |   |      |        |   |
|----|-------------------------|----------|---|------|--------|---|
| 11 | BICF2S23619325          | 61684787 | G | 0    | 0      | A |
| 11 | BICF2S2452007           | 61695096 | C | 0    | 0      | A |
| 11 | G719f34S63              | 61706285 | A | 0    | 0      | G |
| 11 | BICF2S2345788           | 61728110 | G | 0    | 0      | A |
| 11 | BICF2P707152            | 61734001 | 0 | 0    | 0      | A |
| 11 | BICF2G630302696         | 61751566 | A | 0    | 0      | C |
| 11 | BICF2G630302701         | 61755547 | A | 0    | 0      | G |
| 11 | BICF2G630302739         | 61784806 | A | 0    | 0      | G |
| 11 | BICF2G630302768         | 61800824 | A | 1    | 1      | G |
| 11 | BICF2G630302780         | 61809373 | G | 0    | 0      | A |
| 11 | BICF2G630302791         | 61819774 | A | 0    | 0      | G |
| 11 | BICF2G630302810         | 61829964 | C | 1    | 1      | A |
| 11 | BICF2G630302849         | 61842302 | G | 0    | 0      | A |
| 11 | BICF2G630302860         | 61850975 | A | 1    | 1      | G |
| 11 | BICF2G630302870         | 61863776 | G | 1    | 0.7143 | A |
| 11 | BICF2G630302878         | 61870770 | A | 1    | 1      | G |
| 11 | BICF2G630302897         | 61884590 | A | 0.75 | 0.7143 | G |
| 11 | BICF2G630302938         | 61896781 | A | 0.25 | 0.2857 | G |
| 11 | BICF2G630302966         | 61909796 | G | 0.75 | 0.7143 | A |
| 11 | BICF2G630302993         | 61924979 | A | 1    | 1      | G |
| 11 | BICF2G630302999         | 61935768 | A | 0    | 0      | G |
| 11 | BICF2G630303003         | 61944413 | A | 0    | 0      | T |
| 11 | BICF2G630303021         | 61951273 | G | 0    | 0      | A |
| 11 | BICF2G630303036         | 61964686 | A | 0    | 0      | G |
| 11 | TIGRP2P150311_rs9128512 | 61981164 | 0 | 0    | 0      | G |
| 11 | BICF2G630303060         | 61985844 | A | 0    | 0      | G |
| 11 | BICF2P320982            | 62003133 | G | 0    | 0      | A |
| 11 | BICF2P320983            | 62003230 | A | 0.75 | 0.7143 | G |
| 11 | BICF2S23733325          | 62014096 | G | 0.75 | 0.7143 | A |
| 11 | BICF2G630303091         | 62023857 | A | 0    | 0      | C |
| 11 | BICF2G630303100         | 62034660 | C | 0    | 0      | A |
| 11 | BICF2S23033811          | 62047784 | 0 | 0    | 0      | G |
| 11 | BICF2P226645            | 62061556 | A | 0    | 0      | G |
| 11 | BICF2P1120063           | 62066999 | A | 0    | 0      | G |
| 11 | BICF2P287175            | 62077189 | C | 0    | 0      | A |
| 11 | BICF2G630303121         | 62095338 | A | 0    | 0      | C |
| 11 | BICF2G630303137         | 62103093 | A | 0.25 | 0.2857 | G |
| 11 | TIGRP2P150313_rs8726316 | 62114592 | 0 | 0    | 0      | A |
| 11 | BICF2G630303172         | 62129767 | A | 0    | 0      | C |
| 11 | BICF2G630303183         | 62145430 | C | 1    | 1      | A |
| 11 | BICF2G630303195         | 62153151 | G | 0    | 0      | A |
| 11 | BICF2G630303208         | 62165189 | A | 0.75 | 0.7143 | G |
| 11 | BICF2S23552105          | 62170805 | A | 0.75 | 0.75   | G |
| 11 | BICF2P389896            | 62184833 | G | 0.25 | 0.2857 | A |
| 11 | BICF2P607507            | 62201758 | A | 0    | 0      | C |
| 11 | BICF2G630303245         | 62204904 | A | 0    | 0      | G |
| 11 | BICF2G630303275         | 62224599 | A | 0    | 0      | G |

|    |                         |          |   |      |        |   |
|----|-------------------------|----------|---|------|--------|---|
| 11 | BICF2G630303276         | 62231523 | A | 0    | 0      | G |
| 11 | BICF2G630303279         | 62244418 | T | 0    | 0      | A |
| 11 | BICF2P516371            | 62261665 | G | 0.75 | 0.7143 | A |
| 11 | BICF2G630303326         | 62272931 | G | 0.75 | 0.7143 | A |
| 11 | BICF2P129881            | 62289825 | 0 | 0    | 0      | A |
| 11 | BICF2G630303351         | 62297080 | A | 0    | 0      | G |
| 11 | BICF2G630303358         | 62311447 | A | 0    | 0      | G |
| 11 | BICF2G630303387         | 62329626 | A | 0    | 0      | G |
| 11 | BICF2G630303397         | 62333730 | G | 0    | 0      | C |
| 11 | BICF2P723934            | 62342549 | 0 | 0    | 0      | A |
| 11 | TIGRP2P150318_rs8850547 | 62355227 | 0 | 0    | 0      | A |
| 11 | BICF2G630303436         | 62373218 | A | 0.25 | 0.2857 | G |
| 11 | BICF2G630303444         | 62379796 | G | 1    | 1      | A |
| 11 | BICF2G630303463         | 62392822 | A | 1    | 1      | C |
| 11 | BICF2S23056947          | 62401369 | A | 0.25 | 0      | G |
| 11 | BICF2P690138            | 62411208 | A | 0.75 | 0.7143 | G |
| 11 | BICF2G630303492         | 62430877 | G | 0.75 | 0.7143 | A |
| 11 | BICF2G630303504         | 62433806 | A | 0.25 | 0.2857 | G |
| 11 | BICF2G630303521         | 62445709 | A | 1    | 1      | G |
| 11 | BICF2G630303533         | 62457025 | A | 0    | 0      | C |
| 11 | BICF2P510077            | 62470938 | A | 0    | 0      | G |
| 11 | BICF2G630303576         | 62486971 | A | 0    | 0      | G |
| 11 | BICF2G630303582         | 62491192 | A | 0.75 | 0.7143 | G |
| 11 | BICF2G630303629         | 62512306 | G | 0    | 0      | A |
| 11 | BICF2G630303641         | 62515328 | A | 0.75 | 0.7143 | G |
| 11 | BICF2G630303663         | 62529830 | G | 0    | 0      | A |
| 11 | BICF2G630303674         | 62548284 | C | 1    | 1      | A |
| 11 | BICF2G630303688         | 62565277 | A | 0.75 | 0.7143 | C |
| 11 | BICF2G630303691         | 62571559 | G | 0.75 | 0.7143 | A |
| 11 | BICF2G630303715         | 62589531 | A | 0.75 | 0.7143 | G |
| 11 | BICF2G630303729         | 62599777 | T | 0.75 | 0.7143 | A |
| 11 | BICF2G630303741         | 62606632 | G | 1    | 1      | A |
| 11 | TIGRP2P150349_rs8862823 | 62623903 | G | 0    | 0      | A |
| 11 | BICF2G630303801         | 62638018 | G | 1    | 0.7143 | A |
| 11 | BICF2S23758955          | 62656471 | 0 | 0    | 0      | G |
| 11 | BICF2G630303823         | 62676412 | G | 0.5  | 0.5    | A |
| 11 | BICF2G630303849         | 62689049 | A | 0.75 | 0.6429 | C |
| 11 | TIGRP2P150359_rs9124819 | 62705736 | 0 | 0    | 0      | A |
| 11 | BICF2S23045180          | 62714684 | A | 0.25 | 0.1429 | G |
| 11 | BICF2P1079031           | 62735071 | A | 0    | 0      | G |
| 11 | BICF2P1039769           | 62744282 | 0 | 0    | 0      | G |
| 11 | BICF2S2454169           | 62766998 | T | 0.5  | 0.5    | A |
| 11 | BICF2G630303869         | 62768016 | G | 0.75 | 0.8571 | A |
| 11 | BICF2G630303896         | 62779287 | C | 1    | 1      | A |
| 11 | BICF2G630303932         | 62796323 | A | 0.5  | 0.5    | G |
| 11 | BICF2G630303955         | 62814008 | C | 0.25 | 0.1429 | A |
| 11 | BICF2S23150123          | 62832863 | G | 0.5  | 0.5    | A |

|    |                         |          |   |      |        |   |
|----|-------------------------|----------|---|------|--------|---|
| 11 | BICF2G630303991         | 62854009 | A | 0    | 0      | G |
| 11 | BICF2G630304005         | 62859028 | A | 0.25 | 0.3571 | G |
| 11 | BICF2G630304017         | 62873651 | G | 0    | 0      | A |
| 11 | BICF2G630304027         | 62885469 | G | 0.25 | 0.3571 | A |
| 11 | TIGRP2P150401_rs9227835 | 62887203 | A | 0    | 0      | G |
| 11 | BICF2G630304031         | 62895516 | A | 0    | 0      | G |
| 11 | BICF2G630304048         | 62909620 | A | 0.75 | 0.6429 | G |
| 11 | BICF2P1416533           | 62916961 | G | 0.75 | 0.6429 | A |
| 11 | BICF2G630304062         | 62938445 | A | 1    | 1      | G |
| 11 | BICF2G630304063         | 62940639 | C | 1    | 1      | A |
| 11 | BICF2P619824            | 62951256 | 0 | 0    | 0      | G |
| 11 | BICF2P1043792           | 62968971 | A | 0.75 | 0.6667 | G |
| 11 | BICF2P799466            | 62976214 | A | 0    | 0      | G |
| 11 | BICF2G630304074         | 62994823 | A | 0    | 0      | G |
| 11 | BICF2G630304088         | 62999311 | A | 0    | 0      | G |
| 11 | BICF2G630304102         | 63008509 | A | 0    | 0      | G |
| 11 | BICF2G630304127         | 63021269 | A | 0    | 0      | G |
| 11 | BICF2P77022             | 63038471 | G | 1    | 1      | A |
| 11 | TIGRP2P150456_rs8510809 | 63051157 | A | 0.75 | 0.6429 | G |
| 11 | BICF2G630304149         | 63055040 | A | 1    | 1      | G |
| 11 | BICF2P987945            | 63073086 | T | 0.75 | 0.6429 | A |
| 11 | BICF2P1154795           | 63086456 | A | 0    | 0      | G |
| 11 | BICF2G630304165         | 63090563 | G | 0    | 0      | A |
| 11 | BICF2G630304188         | 63100645 | A | 0.75 | 0.6429 | G |
| 11 | BICF2G630304205         | 63112385 | C | 0.25 | 0.3571 | A |
| 11 | BICF2G630304237         | 63134839 | G | 0    | 0      | A |
| 11 | BICF2G630304238         | 63135608 | G | 0    | 0      | A |
| 11 | BICF2G630304255         | 63156122 | G | 0    | 0      | A |
| 11 | BICF2G630304259         | 63161165 | A | 0    | 0      | G |
| 11 | BICF2G630304268         | 63171840 | C | 0    | 0      | A |
| 11 | BICF2G630304278         | 63178674 | C | 0    | 0      | A |
| 11 | BICF2S23224640          | 63187316 | A | 0    | 0      | G |
| 11 | BICF2P601071            | 63203031 | A | 0.25 | 0.1429 | G |
| 11 | BICF2G630304307         | 63208720 | A | 0    | 0      | G |
| 11 | BICF2G630304315         | 63222249 | A | 0    | 0      | G |
| 11 | BICF2G630304317         | 63222505 | G | 0    | 0      | A |
| 11 | TIGRP2P150512_rs9227757 | 63227649 | A | 0.5  | 0.5    | G |
| 11 | BICF2G630304342         | 63239337 | A | 0.25 | 0.1429 | G |
| 11 | BICF2G630304371         | 63254350 | A | 0    | 0      | G |
| 11 | BICF2G630304392         | 63267171 | G | 0.75 | 0.8571 | A |
| 11 | BICF2G630304397         | 63281032 | G | 0.75 | 0.6429 | A |
| 11 | BICF2S22915349          | 63291827 | A | 0    | 0      | G |
| 11 | BICF2G630304414         | 63296041 | A | 0.25 | 0.1429 | G |
| 11 | BICF2G630304427         | 63308804 | A | 0.75 | 0.9167 | G |
| 11 | BICF2G630304461         | 63324822 | A | 0    | 0      | G |
| 11 | BICF2G630304473         | 63330766 | G | 0.5  | 0.5    | A |
| 11 | BICF2G630304485         | 63342964 | A | 0.5  | 0.5    | C |

|    |                         |          |   |      |        |   |
|----|-------------------------|----------|---|------|--------|---|
| 11 | BICF2G630304493         | 63353813 | A | 0.75 | 0.8571 | G |
| 11 | BICF2G630304514         | 63370571 | G | 0.25 | 0.3571 | A |
| 11 | BICF2P71332             | 63386092 | A | 0.25 | 0.1429 | G |
| 11 | BICF2P655275            | 63398977 | G | 0    | 0      | A |
| 11 | BICF2G630304531         | 63408987 | A | 0.25 | 0.3571 | G |
| 11 | BICF2G630304545         | 63412631 | C | 1    | 0.8571 | A |
| 11 | BICF2P1296749           | 63428655 | G | 0.5  | 0.5    | A |
| 11 | BICF2G630304552         | 63439672 | A | 0.5  | 0.5    | G |
| 11 | BICF2G630304569         | 63452171 | A | 0.5  | 0.5    | G |
| 11 | BICF2G630304582         | 63457082 | A | 0.5  | 0.5    | C |
| 11 | BICF2P1464203           | 63476736 | G | 0.5  | 0.5    | A |
| 11 | BICF2G630304616         | 63484861 | G | 0.5  | 0.5    | A |
| 11 | BICF2G630304617         | 63485768 | G | 0.5  | 0.5    | A |
| 11 | BICF2P75649             | 63494609 | G | 0.5  | 0.5    | A |
| 11 | TIGRP2P150555_rs8911094 | 63505424 | C | 0    | 0      | G |
| 11 | BICF2P653552            | 63523750 | A | 0.5  | 0.5    | G |
| 11 | BICF2G630304628         | 63526738 | A | 0    | 0      | C |
| 11 | BICF2G630304641         | 63538599 | A | 0    | 0      | G |
| 11 | TIGRP2P150583_rs8556503 | 63555199 | G | 0.5  | 0.5    | A |
| 11 | BICF2S23327909          | 63564611 | G | 0.25 | 0.1429 | A |
| 11 | BICF2G630304689         | 63565539 | A | 0.75 | 0.6429 | C |
| 11 | BICF2P608918            | 63572018 | G | 0.5  | 0.5    | A |
| 11 | BICF2G630304729         | 63592214 | G | 0.75 | 0.6429 | A |
| 11 | BICF2P756174            | 63595221 | 0 | 0    | 0      | G |
| 11 | BICF2S23521071          | 63609277 | G | 0    | 0      | A |
| 11 | BICF2P792561            | 63636896 | A | 0.5  | 0.5    | G |
| 11 | BICF2G630304834         | 63651511 | A | 0.5  | 0.5    | G |
| 11 | BICF2G630304877         | 63673388 | C | 1    | 0.4286 | A |
| 11 | BICF2P638133            | 63677888 | G | 0.75 | 0.4286 | A |
| 11 | BICF2G630304893         | 63688285 | 0 | 0    | 0      | A |
| 11 | BICF2G630304897         | 63701667 | A | 0.75 | 0.6429 | G |
| 11 | BICF2S23253534          | 63717585 | A | 0    | 0.2143 | G |
| 11 | BICF2S23253533          | 63717683 | G | 0.75 | 0.5    | A |
| 11 | BICF2G630304899         | 63723961 | G | 0    | 0      | A |
| 11 | BICF2G630304924         | 63733812 | A | 0    | 0      | G |
| 11 | TIGRP2P150662_rs8683998 | 63748183 | A | 0    | 0.2143 | G |
| 11 | BICF2S2299269           | 63758308 | A | 0    | 0.1667 | C |
| 11 | TIGRP2P150664_rs8686128 | 63767673 | G | 0.75 | 0.5    | A |
| 11 | BICF2P6990              | 63779917 | C | 0    | 0      | G |
| 11 | BICF2P649773            | 63792519 | A | 0    | 0      | C |
| 11 | TIGRP2P150674_rs8975862 | 63808511 | G | 0    | 0      | A |
| 11 | BICF2G630304967         | 63825355 | A | 0    | 0      | C |
| 11 | BICF2P1016233           | 63826992 | G | 0    | 0.2143 | A |
| 11 | BICF2P534215            | 63829330 | A | 0    | 0      | G |
| 11 | BICF2P1224560           | 63842271 | A | 0    | 0      | G |
| 11 | BICF2G630305022         | 63842404 | G | 0.75 | 0.4286 | A |
| 11 | BICF2G630305042         | 63849019 | A | 0.75 | 0.4286 | G |

|    |                         |          |   |      |        |   |
|----|-------------------------|----------|---|------|--------|---|
| 11 | BICF2G630305061         | 63864170 | A | 0.75 | 0.6429 | C |
| 11 | BICF2S23634862          | 63875357 | A | 0    | 0      | G |
| 11 | BICF2P255340            | 63881525 | A | 0    | 0      | G |
| 11 | BICF2P630411            | 63884676 | G | 0    | 0.2143 | A |
| 11 | BICF2G630305069         | 63899785 | A | 0    | 0      | G |
| 11 | BICF2G630305082         | 63906858 | A | 0    | 0      | G |
| 11 | BICF2G630305097         | 63921524 | A | 0.75 | 0.6429 | G |
| 11 | BICF2P1154484           | 63935340 | 0 | 0    | 0      | G |
| 11 | BICF2G630305111         | 63945866 | G | 0.25 | 0.5714 | A |
| 11 | BICF2P596978            | 63953391 | G | 0.25 | 0.5714 | A |
| 11 | BICF2G630305152         | 63974213 | G | 0    | 0.2143 | A |
| 11 | BICF2G630305154         | 63975612 | G | 0    | 0      | A |
| 11 | BICF2G630305177         | 63996430 | G | 0    | 0.2143 | A |
| 11 | BICF2G630305189         | 64004944 | A | 0    | 0.2143 | G |
| 11 | BICF2G630305195         | 64015538 | G | 0    | 0.2143 | A |
| 11 | BICF2G630305202         | 64028058 | G | 0    | 0      | C |
| 11 | BICF2G630305206         | 64033514 | G | 0    | 0.2143 | A |
| 11 | BICF2P347885            | 64051691 | A | 0    | 0      | C |
| 11 | BICF2P1335387           | 64059133 | G | 0    | 0.2143 | A |
| 11 | BICF2P59926             | 64066066 | C | 0    | 0      | A |
| 11 | BICF2P929914            | 64070376 | G | 0    | 0.2143 | C |
| 11 | BICF2P1216468           | 64083959 | A | 0    | 0      | G |
| 11 | BICF2P1258852           | 64093109 | 0 | 0    | 0      | G |
| 11 | BICF2P859274            | 64107784 | G | 0.25 | 0.3571 | A |
| 11 | BICF2P529447            | 64118510 | A | 1    | 0.7857 | G |
| 11 | BICF2P880805            | 64125511 | G | 0.75 | 0.4286 | A |
| 11 | BICF2P668575            | 64142980 | C | 0.25 | 0.5714 | A |
| 11 | BICF2G630305215         | 64152345 | A | 1    | 1      | G |
| 11 | BICF2G630305223         | 64165909 | C | 0.75 | 0.4286 | G |
| 11 | BICF2G630305231         | 64176755 | A | 1    | 0.7857 | C |
| 11 | BICF2G630305244         | 64181892 | A | 0    | 0.2143 | G |
| 11 | BICF2G630305264         | 64197376 | A | 0.75 | 0.4286 | C |
| 11 | TIGRP2P150740_rs8774481 | 64204807 | A | 0.25 | 0.3571 | G |
| 11 | BICF2G630305298         | 64218692 | G | 0    | 0.2143 | A |
| 11 | BICF2G630305332         | 64233902 | G | 1    | 0.7857 | A |
| 11 | BICF2S22915645          | 64246382 | A | 0.75 | 0.4286 | G |
| 11 | BICF2G630305353         | 64255913 | C | 0    | 0      | A |
| 11 | BICF2G630305359         | 64268431 | 0 | 0    | 0      | A |
| 11 | BICF2P1201942           | 64281512 | A | 0.75 | 0.4286 | G |
| 11 | BICF2G630305380         | 64290919 | A | 0    | 0      | G |
| 11 | BICF2S230802            | 64300683 | G | 0    | 0      | A |
| 11 | BICF2G630305395         | 64309916 | G | 0    | 0.2143 | A |
| 11 | BICF2P141370            | 64321624 | A | 0.75 | 0.4286 | G |
| 11 | BICF2G630305429         | 64338710 | 0 | 0    | 0      | G |
| 11 | BICF2G630305432         | 64339174 | 0 | 0    | 0      | C |
| 11 | BICF2G630305444         | 64345280 | G | 0    | 0      | A |
| 11 | BICF2P1069611           | 64364460 | G | 0.75 | 0.4286 | A |

|    |                         |          |   |      |        |   |
|----|-------------------------|----------|---|------|--------|---|
| 11 | BICF2G630305469         | 64365471 | G | 0.25 | 0.3571 | A |
| 11 | BICF2P576198            | 64373695 | G | 0    | 0.25   | A |
| 11 | BICF2S2363126           | 64373733 | 0 | 0    | 0      | A |
| 11 | BICF2G630305485         | 64379055 | A | 0.25 | 0.3571 | G |
| 11 | BICF2G630305503         | 64389063 | A | 0.25 | 0.3571 | C |
| 11 | BICF2G630305527         | 64400331 | G | 0    | 0      | A |
| 11 | TIGRP2P150772_rs9159767 | 64412468 | A | 0.25 | 0.3571 | G |
| 11 | BICF2G630305558         | 64424389 | G | 0    | 0      | A |
| 11 | BICF2G630305589         | 64438933 | A | 0    | 0      | G |
| 11 | BICF2G630305613         | 64450597 | C | 0    | 0      | A |
| 11 | BICF2G630305662         | 64467221 | A | 0.75 | 0.6429 | G |
| 11 | BICF2G630305680         | 64471225 | G | 0    | 0      | A |
| 11 | BICF2G630305684         | 64471818 | 0 | 0    | 0      | A |
| 11 | TIGRP2P150779_rs8716667 | 64481776 | A | 0.75 | 0.4286 | G |
| 11 | TIGRP2P150781_rs8978630 | 64497241 | A | 0.75 | 0.6429 | G |
| 11 | BICF2G630305760         | 64508719 | C | 0.75 | 0.6429 | A |
| 11 | BICF2P698765            | 64535685 | A | 0    | 0      | G |
| 11 | BICF2G630305782         | 64538201 | A | 0.75 | 0.4286 | G |
| 11 | BICF2G630305798         | 64560815 | G | 0.25 | 0.5714 | A |
| 11 | BICF2G630305802         | 64567477 | G | 0.75 | 0.4286 | A |
| 11 | BICF2G630305811         | 64576063 | G | 0.25 | 0.5714 | A |
| 11 | BICF2G630305817         | 64584612 | 0 | 0    | 0      | C |
| 11 | BICF2P1049359           | 64612701 | A | 1    | 1      | G |
| 11 | BICF2G630305835         | 64613064 | 0 | 0    | 0      | G |
| 11 | BICF2G630305855         | 64629430 | A | 1    | 0.7857 | G |
| 11 | BICF2P1159772           | 64630901 | A | 0    | 0.2143 | G |
| 11 | BICF2G630305857         | 64631922 | A | 0    | 0.2143 | G |
| 11 | BICF2G630305890         | 64651122 | G | 1    | 0.7857 | A |
| 11 | BICF2G630305898         | 64658767 | A | 1    | 1      | G |
| 11 | BICF2G630305903         | 64664045 | G | 1    | 1      | A |
| 11 | BICF2G630305915         | 64672286 | A | 0.75 | 0.6429 | G |
| 11 | BICF2G630305936         | 64686565 | A | 0.25 | 0.3571 | G |
| 11 | BICF2G630305949         | 64691766 | G | 0.75 | 0.6429 | A |
| 11 | BICF2G630305955         | 64708870 | A | 0    | 0      | G |
| 11 | BICF2G630305956         | 64710582 | G | 0    | 0      | C |
| 11 | TIGRP2P150821_rs9087728 | 64721490 | 0 | 0    | 0      | C |
| 11 | BICF2P973203            | 64729055 | A | 0    | 0      | G |
| 11 | BICF2P544714            | 64734549 | A | 0    | 0      | G |
| 11 | BICF2P1438249           | 64745955 | A | 0    | 0      | C |
| 11 | BICF2G630305972         | 64765032 | A | 1    | 1      | C |
| 11 | BICF2G630305980         | 64771969 | 0 | 0    | 0      | G |
| 11 | BICF2P518386            | 64776544 | A | 0    | 0.2143 | G |
| 11 | TIGRP2P150826_rs8902009 | 64779892 | G | 0    | 0      | A |
| 11 | BICF2P459833            | 64793226 | A | 1    | 0.7857 | G |
| 11 | BICF2P159715            | 64807090 | A | 0.75 | 0.4286 | G |
| 11 | BICF2G630306006         | 64824549 | A | 0.75 | 0.6429 | G |
| 11 | BICF2G630306009         | 64826159 | G | 0    | 0.2143 | A |



|    |                         |          |   |      |        |   |
|----|-------------------------|----------|---|------|--------|---|
| 11 | TIGRP2P150867_rs9214892 | 64845580 | A | 0    | 0.2143 | T |
| 11 | TIGRP2P150869_rs9026029 | 64848668 | C | 0.75 | 0.4286 | A |
| 11 | BICF2S2378804           | 64860512 | A | 0    | 0.2143 | G |
| 11 | BICF2G630306025         | 64875802 | G | 0    | 0      | A |
| 11 | BICF2G630306036         | 64881408 | G | 0    | 0      | A |
| 11 | BICF2P1008523           | 64900291 | A | 0    | 0      | G |
| 11 | BICF2G630306066         | 64917395 | A | 0.75 | 0.6429 | G |
| 11 | BICF2G630306070         | 64918862 | A | 0    | 0.2143 | C |
| 11 | BICF2G630306082         | 64929231 | A | 0.75 | 0.6429 | G |
| 11 | BICF2P1430918           | 64946239 | 0 | 0    | 0      | C |
| 11 | BICF2S23162394          | 64974337 | A | 0.25 | 0.3571 | G |
| 11 | BICF2G630306098         | 64979427 | C | 0.25 | 0.3571 | A |
| 11 | BICF2G630306108         | 64990802 | G | 0.25 | 0.3571 | A |
| 11 | BICF2G630306127         | 64998179 | A | 1    | 1      | G |
| 11 | BICF2G630306160         | 65012483 | G | 0.25 | 0.3571 | A |
| 11 | BICF2G630306179         | 65033949 | A | 0.25 | 0.3571 | G |
| 11 | BICF2G630306188         | 65052218 | A | 0    | 0      | G |
| 11 | BICF2P164696            | 65062705 | A | 0    | 0      | G |
| 11 | BICF2G630306203         | 65074142 | A | 0.75 | 0.6429 | G |
| 11 | BICF2G630306217         | 65079897 | A | 0.75 | 0.6429 | G |
| 11 | TIGRP2P150914_rs8720892 | 65110218 | G | 0.75 | 0.6429 | A |
| 11 | BICF2P462179            | 65117162 | 0 | 0    | 0      | G |
| 11 | BICF2P407128            | 65129081 | G | 0    | 0      | A |
| 11 | BICF2G630306223         | 65137013 | C | 0    | 0      | A |
| 11 | BICF2G630306228         | 65156811 | G | 0.75 | 0.4286 | A |
| 11 | BICF2G630306243         | 65164732 | A | 0.25 | 0.5714 | G |
| 11 | BICF2S23357159          | 65178089 | G | 0.75 | 0.6429 | A |
| 11 | BICF2G630306265         | 65185124 | A | 0.25 | 0.5714 | G |
| 11 | BICF2P1260288           | 65196123 | A | 0    | 0      | G |
| 11 | BICF2G630306294         | 65212614 | A | 0.25 | 0.5714 | G |
| 11 | BICF2G630306296         | 65225542 | A | 0.25 | 0.3571 | G |
| 11 | BICF2G630306307         | 65230058 | A | 0    | 0      | G |
| 11 | BICF2G630306330         | 65240746 | A | 0.25 | 0.3571 | G |
| 11 | BICF2G630306343         | 65251764 | A | 0    | 0      | G |
| 11 | BICF2P847123            | 65262559 | G | 0.75 | 0.4286 | A |
| 11 | TIGRP2P150962_rs8714153 | 65284211 | G | 0    | 0      | A |
| 11 | BICF2G630306353         | 65290598 | A | 0    | 0      | G |
| 11 | BICF2G630306359         | 65298007 | G | 0.75 | 0.4286 | A |
| 11 | BICF2G630306371         | 65317800 | G | 1    | 0.7857 | C |
| 11 | BICF2G630306372         | 65325393 | A | 0    | 0      | G |
| 11 | TIGRP2P150975_rs9223243 | 65335653 | G | 0    | 0.2143 | A |
| 11 | BICF2S2378518           | 65347020 | G | 0    | 0      | A |
| 11 | BICF2G630306390         | 65355002 | G | 0    | 0      | A |
| 11 | BICF2G630306422         | 65377171 | G | 1    | 0.7857 | A |
| 11 | TIGRP2P150982_rs8612765 | 65380491 | A | 0    | 0      | G |
| 11 | BICF2G630306442         | 65396407 | G | 1    | 1      | A |
| 11 | BICF2G630306446         | 65402148 | G | 0    | 0      | A |

|    |                         |          |   |      |        |   |
|----|-------------------------|----------|---|------|--------|---|
| 11 | BICF2G630306470         | 65412782 | G | 0    | 0      | A |
| 11 | BICF2G630306489         | 65424668 | G | 0    | 0      | A |
| 11 | BICF2S23250186          | 65445274 | G | 0    | 0.2143 | A |
| 11 | BICF2G630306495         | 65454554 | C | 0    | 0.2143 | A |
| 11 | BICF2P1056047           | 65456099 | A | 0    | 0      | G |
| 11 | BICF2P1056046           | 65456117 | G | 0.75 | 0.6429 | A |
| 11 | BICF2P732289            | 65458427 | 0 | 0    | 0      | A |
| 11 | BICF2S23653829          | 65475303 | A | 0    | 0      | C |
| 11 | BICF2G630306507         | 65481545 | C | 0.75 | 0.6429 | A |
| 11 | BICF2G630306520         | 65499634 | T | 0.25 | 0.3571 | A |
| 11 | BICF2G630306531         | 65510202 | 0 | 0    | 0      | G |
| 11 | BICF2P816294            | 65512556 | 0 | 0    | 0      | G |
| 11 | BICF2P1203509           | 65526683 | C | 0.25 | 0.3571 | A |
| 11 | TIGRP2P151012_rs8670936 | 65527231 | G | 0.25 | 0.3571 | A |
| 11 | BICF2G630306538         | 65540569 | A | 0.25 | 0.3571 | G |
| 11 | BICF2P1221256           | 65559504 | A | 0    | 0      | G |
| 11 | BICF2P1111641           | 65566861 | A | 0.5  | 0.5    | G |
| 11 | BICF2G630306627         | 65583033 | A | 0.25 | 0.3571 | G |
| 11 | BICF2G630306634         | 65586288 | A | 0.25 | 0.3571 | G |
| 11 | BICF2G630306650         | 65597370 | A | 0    | 0      | G |
| 11 | TIGRP2P151026_rs8833944 | 65597448 | C | 0.5  | 0.5    | A |
| 11 | BICF2S2294641           | 65614664 | 0 | 0    | 0      | A |
| 11 | BICF2S23417740          | 65619773 | A | 0.75 | 0.8571 | C |
| 11 | BICF2G630306660         | 65637779 | A | 0    | 0      | G |
| 11 | BICF2P355410            | 65644741 | A | 0    | 0      | G |
| 11 | TIGRP2P151035_rs9108334 | 65644798 | A | 0    | 0      | G |
| 11 | BICF2P382666            | 65658943 | A | 0    | 0      | G |
| 11 | BICF2P267385            | 65672014 | A | 0    | 0      | G |
| 11 | BICF2P271156            | 65683492 | G | 0    | 0      | A |
| 11 | BICF2P135938            | 65688711 | A | 1    | 1      | C |
| 11 | BICF2P560930            | 65692717 | A | 1    | 1      | G |
| 11 | BICF2P291597            | 65704333 | G | 0    | 0      | A |
| 11 | BICF2S23430976          | 65715184 | C | 0.25 | 0.1429 | G |
| 11 | BICF2P910107            | 65728646 | A | 0    | 0      | G |
| 11 | BICF2P685856            | 65735727 | A | 0    | 0      | G |
| 11 | BICF2S2451655           | 65779216 | A | 0    | 0      | G |
| 11 | BICF2P17417             | 65781725 | 0 | 0    | 0      | A |
| 11 | BICF2P1053653           | 65807187 | A | 0.25 | 0.1429 | G |
| 11 | BICF2P1255487           | 65823803 | A | 0.25 | 0.1429 | G |
| 11 | BICF2P1213067           | 65831544 | A | 0.75 | 0.8571 | G |
| 11 | BICF2P366242            | 65842935 | A | 0    | 0      | G |
| 11 | BICF2P497190            | 65852664 | A | 1    | 1      | G |
| 11 | BICF2P164671            | 65867230 | C | 0    | 0      | A |
| 11 | BICF2P778401            | 65882762 | A | 0    | 0      | G |
| 11 | BICF2P1133252           | 65893175 | G | 0    | 0      | A |
| 11 | BICF2P446224            | 65899466 | G | 0.25 | 0.1429 | A |
| 11 | BICF2P1049071           | 65902838 | G | 0    | 0      | C |

|    |                         |          |   |      |        |   |
|----|-------------------------|----------|---|------|--------|---|
| 11 | BICF2P356029            | 65917384 | A | 1    | 1      | G |
| 11 | BICF2P1049115           | 65921304 | C | 1    | 1      | A |
| 11 | TIGRP2P151124_rs9136957 | 65937570 | A | 0    | 0      | T |
| 11 | BICF2P725134            | 65943073 | G | 0    | 0      | C |
| 11 | BICF2P668672            | 65953401 | A | 0.25 | 0.1429 | G |
| 11 | BICF2P285924            | 65983015 | G | 0.25 | 0.1429 | A |
| 11 | BICF2P942478            | 65994569 | A | 0.25 | 0.1429 | G |
| 11 | BICF2P1431742           | 66006607 | A | 0.25 | 0.1429 | G |
| 11 | BICF2S22950959          | 66015056 | A | 0.25 | 0.1429 | G |
| 11 | BICF2S2376155           | 66022829 | A | 0.25 | 0.1429 | G |
| 11 | BICF2P628650            | 66041556 | A | 0    | 0.1429 | C |
| 11 | BICF2G630306661         | 66060255 | 0 | 0    | 0      | G |
| 11 | TIGRP2P151144_rs8842762 | 66088763 | G | 0.75 | 0.8571 | A |
| 11 | BICF2P901631            | 66090771 | C | 0.5  | 0.2857 | A |
| 11 | BICF2P1332321           | 66102349 | G | 0.75 | 0.4286 | A |
| 11 | BICF2P295006            | 66127005 | A | 0.5  | 0.2857 | G |
| 11 | TIGRP2P151180_rs8780724 | 66142816 | A | 0.25 | 0.1429 | G |
| 11 | BICF2P134150            | 66146590 | G | 0.25 | 0.1429 | A |
| 11 | TIGRP2P151184_rs9042196 | 66151479 | G | 0.75 | 0.4286 | A |
| 11 | TIGRP2P151191_rs9148372 | 66159839 | T | 0.5  | 0.2857 | A |
| 11 | BICF2S23661156          | 66177173 | G | 0    | 0      | A |
| 11 | TIGRP2P151198_rs9002591 | 66187010 | T | 0    | 0      | A |
| 11 | TIGRP2P151202_rs9106116 | 66204542 | A | 0    | 0      | G |
| 11 | BICF2P548090            | 66211421 | A | 0    | 0      | G |
| 11 | TIGRP2P151206_rs8639023 | 66217098 | 0 | 0    | 0      | C |
| 11 | BICF2P159450            | 66231342 | A | 0.25 | 0.5714 | G |
| 11 | TIGRP2P151214_rs9111395 | 66248964 | A | 0.5  | 0.2857 | C |
| 11 | BICF2S23514492          | 66250178 | G | 0.5  | 0.2857 | A |
| 11 | TIGRP2P151217_rs8854872 | 66255756 | A | 0    | 0      | G |
| 11 | BICF2P608709            | 66265223 | C | 0    | 0      | G |
| 11 | BICF2P606216            | 66276642 | A | 0    | 0.6    | G |
| 11 | TIGRP2P151225_rs8915449 | 66287644 | G | 0    | 0      | A |
| 11 | BICF2P582842            | 66297489 | C | 0.25 | 0.1429 | A |
| 11 | BICF2P511058            | 66298939 | A | 0.25 | 0.1429 | G |
| 11 | TIGRP2P151259_rs8759812 | 66309405 | G | 0    | 0      | A |
| 11 | TIGRP2P151265_rs8880592 | 66321829 | C | 0.5  | 0.2857 | G |
| 11 | BICF2P1248030           | 66332944 | G | 0.5  | 0.2857 | A |
| 11 | BICF2P313034            | 66354291 | G | 0    | 0      | A |
| 11 | BICF2P921745            | 66360773 | A | 0    | 0      | G |
| 11 | BICF2S23714179          | 66374340 | A | NA   | 1      | G |
| 11 | BICF2P467055            | 66385640 | A | 0.75 | 0.8571 | C |
| 11 | TIGRP2P151289_rs8938002 | 66394413 | A | 0    | 0      | C |
| 11 | TIGRP2P151292_rs8961371 | 66406622 | C | 0.25 | 0.1429 | A |
| 11 | BICF2P650191            | 66416062 | A | 0.75 | 0.8571 | G |
| 11 | TIGRP2P151298_rs9078019 | 66431526 | T | 0.25 | 0.1429 | A |
| 11 | BICF2P231400            | 66434185 | G | 0.25 | 0.1429 | A |
| 11 | TIGRP2P151300_rs9151522 | 66445709 | C | 0.5  | 0.2857 | A |

|    |                         |          |   |      |         |   |
|----|-------------------------|----------|---|------|---------|---|
| 11 | BICF2P59033             | 66453044 | G | 0.5  | 0.2857  | A |
| 11 | BICF2P213097            | 66458564 | G | 0.5  | 0.2857  | A |
| 11 | BICF2S23147047          | 66473482 | A | 0.5  | 0.2857  | G |
| 11 | BICF2S2369607           | 66485142 | G | 0.5  | 0.2857  | A |
| 11 | TIGRP2P151338_rs9118242 | 66494827 | A | 0    | 0       | T |
| 11 | BICF2P1218225           | 66520052 | 0 | 0    | 0       | T |
| 11 | BICF2S23612357          | 66534100 | 0 | 0    | 0       | G |
| 11 | BICF2P698063            | 66549462 | 0 | 0    | 0       | A |
| 11 | BICF2P101748            | 66558964 | A | 0    | 0       | G |
| 11 | BICF2S23550329          | 66568114 | A | 0    | 0       | G |
| 11 | BICF2S23026015          | 66580750 | G | 0.5  | 0.2857  | A |
| 11 | BICF2P1323621           | 66592767 | C | 0    | 0       | A |
| 11 | BICF2P39301             | 66604869 | C | 0.5  | 0.7143  | G |
| 11 | BICF2P39300             | 66605111 | T | 0.5  | 0.2857  | A |
| 11 | BICF2S23627420          | 66615788 | A | 0    | 0       | G |
| 11 | BICF2P1264244           | 66622108 | A | 0.5  | 0.2857  | C |
| 11 | BICF2P1264256           | 66623554 | A | 0.5  | 0.2857  | G |
| 11 | BICF2P356517            | 66638206 | C | 0.5  | 0.2857  | A |
| 11 | BICF2P736646            | 66644674 | A | 0.5  | 0.25    | G |
| 11 | BICF2S22949030          | 66664213 | A | 0    | 0       | C |
| 11 | BICF2P358059            | 66666314 | G | 0.5  | 0.2857  | A |
| 11 | BICF2P1191148           | 66678357 | A | 0.5  | 0.2857  | G |
| 11 | BICF2S23640675          | 66696449 | A | 0.5  | 0.2857  | G |
| 11 | TIGRP2P151405_rs8645467 | 66700742 | A | 0.5  | 0.2857  | G |
| 11 | BICF2P1266743           | 66718636 | A | 0    | 0       | C |
| 11 | BICF2P430991            | 66733117 | 0 | 0    | 0       | A |
| 11 | BICF2P1086291           | 66736486 | A | 0    | 0       | G |
| 11 | BICF2P676830            | 66752855 | 0 | 0    | 0       | G |
| 11 | BICF2S23651430          | 66769689 | G | 0    | 0       | A |
| 11 | BICF2P775461            | 66787435 | G | 0    | 0       | A |
| 11 | BICF2P1009348           | 66796900 | G | 0    | 0       | A |
| 11 | TIGRP2P151440_rs8807113 | 66808976 | A | 0.75 | 0.4286  | G |
| 11 | BICF2P526164            | 66815565 | 0 | 0    | 0       | G |
| 11 | BICF2P1063109           | 66834499 | A | 0    | 0       | G |
| 11 | TIGRP2P151450_rs8903640 | 66841755 | A | 0    | 0       | G |
| 11 | BICF2P1504956           | 66857506 | G | 0    | 0       | A |
| 11 | TIGRP2P151461_rs8946304 | 66863044 | C | 0.25 | 0.1429  | A |
| 11 | BICF2P1214828           | 66875923 | A | 0.25 | 0.08333 | C |
| 11 | BICF2P609876            | 66885201 | A | 0.25 | 0.1429  | G |
| 11 | BICF2S23613350          | 66898813 | G | 0.25 | 0.1429  | A |
| 11 | TIGRP2P151468_rs9161785 | 66902955 | A | 0.25 | 0.1429  | G |
| 11 | TIGRP2P151475_rs9045442 | 66912771 | A | 0.25 | 0.1429  | C |
| 11 | BICF2P455975            | 66919057 | G | 0.25 | 0.1429  | A |
| 11 | BICF2S23542922          | 66936666 | A | 0.75 | 0.8571  | G |
| 11 | TIGRP2P151499_rs9123243 | 66948444 | C | 0.5  | 0.2857  | G |
| 11 | BICF2P1090138           | 66957718 | A | 0.25 | 0.1429  | G |
| 11 | BICF2P1090139           | 66957769 | C | 0.25 | 0.5714  | A |

|    |                         |          |   |      |        |   |
|----|-------------------------|----------|---|------|--------|---|
| 11 | BICF2S22963580          | 66970903 | A | 0    | 0      | G |
| 11 | BICF2P985486            | 66982047 | T | 0.5  | 0.2857 | A |
| 11 | BICF2P1307269           | 66997214 | A | 0    | 0.5714 | T |
| 11 | BICF2P696089            | 67000941 | T | 0.25 | 0.5714 | A |
| 11 | BICF2P524010            | 67015486 | A | 0.25 | 0.1429 | G |
| 11 | BICF2P392168            | 67022883 | G | 0.25 | 0.1429 | A |
| 11 | TIGRP2P151526_rs8619688 | 67029549 | A | 0    | 0      | G |
| 11 | BICF2P794654            | 67036809 | A | 0    | 0      | G |
| 11 | BICF2P484274            | 67046029 | A | 0    | 0      | G |
| 11 | BICF2P374956            | 67064442 | G | 0    | 0      | A |
| 11 | BICF2P602679            | 67076729 | G | 0    | 0      | A |
| 11 | BICF2P607387            | 67086948 | 0 | 0    | 0      | G |
| 11 | BICF2P607383            | 67087356 | A | 0    | 0      | G |
| 11 | BICF2P230759            | 67092370 | C | 0    | 0      | A |
| 11 | BICF2P220175            | 67097291 | G | 0    | 0      | C |
| 11 | BICF2P642936            | 67105515 | A | 0    | 0      | G |
| 11 | BICF2P65732             | 67115647 | A | 0    | 0      | G |
| 11 | BICF2P645847            | 67132529 | 0 | 0    | 0      | A |
| 11 | BICF2S24116327          | 67146903 | C | 0    | 0      | A |
| 11 | BICF2P1458243           | 67158068 | 0 | 0    | 0      | C |
| 11 | BICF2P750958            | 67183373 | C | 0.25 | 0.5714 | A |
| 11 | TIGRP2P151568_rs9219501 | 67195951 | A | 0.25 | 0.5714 | G |
| 11 | BICF2P856107            | 67209640 | A | 0.25 | 0.5714 | G |
| 11 | BICF2P249476            | 67223002 | 0 | 0    | 0      | G |
| 11 | TIGRP2P151578_rs8771960 | 67232254 | A | 0.25 | 0.5714 | C |
| 11 | BICF2P1141680           | 67240592 | A | 0.25 | 0.5714 | G |
| 11 | BICF2P1008050           | 67255223 | C | 0.25 | 0.5714 | A |
| 11 | BICF2P1308827           | 67266490 | C | 0.25 | 0.5714 | A |
| 11 | BICF2P301587            | 67292655 | A | 0.75 | 0.8571 | G |
| 11 | BICF2P6230              | 67305494 | A | 0.5  | 0.2857 | G |
| 11 | BICF2P1502717           | 67310263 | A | 0.5  | 0.2857 | G |
| 11 | BICF2P453915            | 67321131 | A | 0    | 0      | G |
| 11 | BICF2P601294            | 67337742 | 0 | 0    | 0      | G |
| 11 | TIGRP2P151608_rs8872526 | 67345453 | A | 0    | 0      | G |
| 11 | BICF2P813350            | 67351706 | A | 0    | 0      | G |
| 11 | TIGRP2P151618_rs8585865 | 67366395 | A | 0    | 0      | G |
| 11 | TIGRP2P151621_rs9064907 | 67374587 | A | 0    | 0      | G |
| 11 | BICF2P686580            | 67379717 | A | 0    | 0      | G |
| 11 | BICF2S23322467          | 67401073 | A | 0.75 | 0.4286 | G |
| 11 | BICF2S2306377           | 67401892 | C | 0.75 | 0.4286 | G |
| 11 | BICF2P1159069           | 67404663 | A | 0.75 | 0.4167 | G |
| 11 | BICF2S23136783          | 67418353 | A | 0    | 0      | G |
| 11 | BICF2P71382             | 67428387 | G | 0.25 | 0.5714 | A |
| 11 | BICF2P518199            | 67436900 | A | 0.25 | 0.5714 | G |
| 11 | BICF2P453543            | 67448798 | G | 0    | 0      | A |
| 11 | BICF2S23764623          | 67460408 | A | 0    | 0      | G |
| 11 | BICF2P142714            | 67470819 | G | 0.75 | 0.4286 | A |

|    |                         |          |   |      |        |   |
|----|-------------------------|----------|---|------|--------|---|
| 11 | BICF2P171344            | 67511671 | G | 0    | 0      | A |
| 11 | BICF2P171345            | 67511723 | A | 0    | 0      | T |
| 11 | BICF2P426964            | 67523073 | A | 0    | 0      | G |
| 11 | BICF2S23550990          | 67532832 | G | 0    | 0      | A |
| 11 | BICF2S23633907          | 67539780 | A | 0    | 0      | G |
| 11 | BICF2P1220131           | 67563313 | 0 | 0    | 0      | A |
| 11 | BICF2P730894            | 67589135 | A | 0.25 | 0.5714 | G |
| 11 | BICF2P678136            | 67598727 | A | 0    | 0      | G |
| 11 | BICF2P619935            | 67613316 | A | 0    | 0      | G |
| 11 | BICF2S23215860          | 67628984 | A | 0    | 0      | C |
| 11 | BICF2P1027980           | 67639812 | A | 0.5  | 0.2857 | T |
| 11 | BICF2P689703            | 67657770 | A | 0.5  | 0.2857 | G |
| 11 | BICF2S23215504          | 67668754 | C | 0.5  | 0.7143 | G |
| 11 | BICF2P1245828           | 67693464 | A | 0    | 0      | G |
| 11 | BICF2P1208757           | 67695323 | A | 0    | 0      | G |
| 11 | BICF2P935272            | 67705667 | G | 0    | 0      | A |
| 11 | BICF2P57881             | 67713410 | A | 0    | 0      | G |
| 11 | BICF2P364555            | 67724228 | G | 0.25 | 0.1429 | A |
| 11 | TIGRP2P151727_rs8878126 | 67736019 | G | 0.75 | 0.4286 | A |
| 11 | BICF2P928014            | 67749458 | A | 0    | 0      | G |
| 11 | BICF2P945830            | 67767019 | C | 0    | 0      | G |
| 11 | BICF2P307995            | 67777001 | G | 0.75 | 0.4286 | A |
| 11 | BICF2P1132749           | 67787626 | G | 0.75 | 0.4286 | A |
| 11 | BICF2P159316            | 67797360 | G | 0    | 0      | A |
| 11 | TIGRP2P151757_rs9240270 | 67805656 | G | 0.75 | 0.4286 | A |
| 11 | BICF2P747593            | 67823674 | A | 0    | 0      | G |
| 11 | BICF2P905900            | 67834789 | A | 0    | 0      | C |
| 11 | BICF2P638293            | 67846177 | C | 0    | 0      | A |
| 11 | BICF2S23153200          | 67848069 | A | 0    | 0      | T |
| 11 | BICF2P1034448           | 67853048 | T | 0    | 0      | A |
| 11 | BICF2P890187            | 67865078 | G | 0    | 0      | A |
| 11 | BICF2P230975            | 67873386 | G | 0.5  | 0.2857 | A |
| 11 | BICF2P1423470           | 67887265 | A | 0.5  | 0.7143 | G |
| 11 | BICF2P543366            | 67906300 | A | 0.25 | 0.5714 | G |
| 11 | BICF2P583439            | 67908341 | A | 0    | 0      | G |
| 11 | BICF2P1410507           | 67920857 | A | 0    | 0      | G |
| 11 | BICF2P641102            | 67932473 | C | 0    | 0      | A |
| 11 | BICF2P615869            | 67950854 | A | 0.25 | 0.1429 | G |
| 11 | TIGRP2P151808_rs8865846 | 67957614 | A | 0.75 | 0.4286 | C |
| 11 | BICF2P672512            | 67968129 | G | 0.25 | 0.5714 | A |
| 11 | TIGRP2P151818_rs9152799 | 67981214 | C | 0.25 | 0.1429 | A |
| 11 | BICF2P1067772           | 67998124 | A | 0    | 0      | G |
| 11 | TIGRP2P151830_rs9012235 | 68003809 | A | 0.25 | 0.1429 | T |
| 11 | TIGRP2P151834_rs9081885 | 68010400 | A | 0    | 0      | C |
| 11 | BICF2S23219954          | 68011825 | A | 0    | 0.5714 | G |
| 11 | BICF2P978132            | 68019119 | A | 0    | 0      | G |
| 11 | TIGRP2P151840_rs8674188 | 68029045 | A | 1    | 1      | G |

|    |                         |          |   |      |        |   |
|----|-------------------------|----------|---|------|--------|---|
| 11 | BICF2S23527869          | 68038058 | A | 0.5  | 0.2857 | G |
| 11 | BICF2P913835            | 68048441 | A | 0.25 | 0.5714 | G |
| 11 | BICF2P913834            | 68048458 | C | 0    | 0      | G |
| 11 | BICF2P982854            | 68059913 | G | 0.75 | 0.4286 | A |
| 11 | BICF2P646805            | 68069292 | 0 | 0    | 0      | A |
| 11 | BICF2P1191963           | 68083541 | A | 0.25 | 0.1429 | G |
| 11 | BICF2S23546211          | 68100184 | A | 0.75 | 0.8571 | G |
| 11 | TIGRP2P151863_rs9037870 | 68102478 | A | 0.75 | 0.8571 | G |
| 11 | BICF2P955753            | 68110523 | 0 | 0    | 0      | G |
| 11 | TIGRP2P151864_rs8825084 | 68121455 | 0 | 0    | 0      | A |
| 11 | BICF2P1389530           | 68136288 | 0 | 0    | 0      | G |
| 11 | BICF2P405982            | 68140207 | G | 0.25 | 0.5714 | A |
| 11 | BICF2P216307            | 68167587 | A | 0.5  | 0.2857 | G |
| 11 | BICF2P545730            | 68179082 | A | 0.75 | 0.8571 | G |
| 11 | BICF2S2301819           | 68186010 | A | 0.25 | 0.5714 | C |
| 11 | BICF2P1180331           | 68197498 | A | 0.25 | 0.5714 | G |
| 11 | BICF2P1244574           | 68202701 | A | 0.25 | 0.5714 | C |
| 11 | TIGRP2P151895_rs8699556 | 68203625 | A | 0    | 0      | G |
| 11 | BICF2P702867            | 68211418 | A | 0.5  | 0.2857 | T |
| 11 | BICF2P703561            | 68212569 | A | 0.5  | 0.2857 | G |
| 11 | BICF2P479048            | 68218701 | A | 0.5  | 0.7143 | G |
| 11 | TIGRP2P151911_rs8547412 | 68234713 | G | 0    | 0      | A |
| 11 | TIGRP2P151912_rs8769132 | 68257151 | 0 | NA   | 0      | A |
| 11 | BICF2P816697            | 68272829 | G | 0    | 0      | A |
| 11 | BICF2P458131            | 68278967 | A | 0    | 0      | G |
| 11 | BICF2P668629            | 68294720 | A | 0    | 0      | G |
| 11 | BICF2P290025            | 68308397 | 0 | 0    | 0      | A |
| 11 | BICF2P1185732           | 68321219 | 0 | 0    | 0      | G |
| 11 | TIGRP2P151922_rs8796080 | 68323083 | G | 0.25 | 0.5833 | A |
| 11 | BICF2S23451102          | 68334688 | A | 0    | 0      | C |
| 11 | TIGRP2P151930_rs8935371 | 68342632 | G | 0.75 | 0.4286 | A |
| 11 | BICF2S23417202          | 68348593 | G | 0    | 0      | A |
| 11 | BICF2P658454            | 68378899 | A | 0    | 0      | G |
| 11 | TIGRP2P151947_rs9092882 | 68386797 | A | 0    | 0      | G |
| 11 | BICF2P1084948           | 68390843 | G | 0    | 0      | A |
| 11 | BICF2P672133            | 68410365 | 0 | 0    | 0      | A |
| 11 | BICF2P965663            | 68417490 | G | 0.75 | 0.4286 | A |
| 11 | TIGRP2P151959_rs8746399 | 68430619 | G | 0.75 | 0.4286 | A |
| 11 | BICF2P298491            | 68447291 | C | 0    | 0      | A |
| 11 | BICF2P769101            | 68453579 | G | 0    | 0      | A |
| 11 | TIGRP2P151967_rs9197170 | 68464811 | 0 | 0    | 0      | A |
| 11 | BICF2P908679            | 68474017 | G | 0    | 0      | A |
| 11 | BICF2P482826            | 68493923 | C | 1    | 1      | G |
| 11 | BICF2P381414            | 68496037 | A | 0.75 | 0.4286 | G |
| 11 | BICF2P812539            | 68508022 | A | 0.75 | 0.4286 | G |
| 11 | TIGRP2P151983_rs9205904 | 68528184 | G | 0    | 0      | A |
| 11 | BICF2P82123             | 68529280 | A | 0.75 | 0.4286 | G |

|    |                         |          |   |      |        |   |
|----|-------------------------|----------|---|------|--------|---|
| 11 | BICF2P339079            | 68540682 | A | 0.75 | 0.4286 | G |
| 11 | BICF2P898899            | 68560580 | A | 0    | 0      | G |
| 11 | BICF2P238727            | 68567564 | A | 0    | 0      | G |
| 11 | BICF2P914364            | 68577663 | C | 0.5  | 0.2857 | A |
| 11 | BICF2P393090            | 68590810 | A | 0    | 0      | G |
| 11 | TIGRP2P152008_rs8546293 | 68602205 | G | 1    | 1      | A |
| 11 | BICF2P1020504           | 68611984 | A | 0.25 | 0.1429 | G |
| 11 | BICF2P433053            | 68621040 | C | 0.75 | 0.8571 | A |
| 11 | BICF2P1371147           | 68634324 | C | 0.75 | 0.8571 | G |
| 11 | BICF2P551426            | 68646699 | A | 0.75 | 0.8571 | G |
| 11 | BICF2P1044993           | 68662067 | G | 0.5  | 0.2857 | A |
| 11 | BICF2P225138            | 68668694 | 0 | 0    | 0      | C |
| 11 | BICF2P455671            | 68678100 | A | 0    | 0      | G |
| 11 | BICF2P262922            | 68711012 | G | 0    | 0      | A |
| 11 | BICF2P735583            | 68719993 | A | 0.5  | 0.2857 | G |
| 11 | TIGRP2P152024_rs8906228 | 68729137 | A | 0.5  | 0.7143 | C |
| 11 | BICF2P1206877           | 68739480 | 0 | 0    | 0      | A |
| 11 | BICF2S23052549          | 68755540 | C | 0.5  | 0.2857 | G |
| 11 | TIGRP2P152041_rs9164713 | 68764856 | A | 0.25 | 0.5714 | G |
| 11 | BICF2P997143            | 68772909 | A | 0.5  | 0.2857 | G |
| 11 | BICF2P551732            | 68783296 | A | 0    | 0      | G |
| 11 | BICF2P495340            | 68792463 | A | 0    | 0      | G |
| 11 | BICF2P739187            | 68794837 | G | 0.25 | 0.5714 | A |
| 11 | BICF2P977078            | 68809917 | 0 | 0    | 0      | A |
| 11 | BICF2P1503169           | 68821125 | G | 0.75 | 0.8571 | A |
| 11 | BICF2P1178200           | 68827677 | G | 0    | 0      | A |
| 11 | BICF2P22279             | 68845092 | G | 0    | 0      | A |
| 11 | BICF2P789889            | 68857154 | A | 0    | 0      | G |
| 11 | BICF2P825137            | 68869732 | A | 0    | 0      | G |
| 11 | BICF2P187394            | 68876404 | A | 0.75 | 0.8333 | G |
| 11 | BICF2S23018767          | 68891921 | A | 0    | 0      | G |
| 11 | BICF2P422105            | 68900294 | C | 0.25 | 0.1429 | A |
| 11 | BICF2P456208            | 68908950 | A | 0.25 | 0.1429 | G |
| 11 | BICF2P769671            | 68927240 | A | 0.5  | 0.2857 | G |
| 11 | BICF2P86563             | 68931781 | A | 0    | 0      | G |
| 11 | TIGRP2P152111_rs8649116 | 68947319 | 0 | 0    | 0      | G |
| 11 | TIGRP2P152114_rs9116675 | 68956769 | A | 0.5  | 0.2857 | G |
| 11 | BICF2P46315             | 68965740 | A | 0.5  | 0.2857 | G |
| 11 | BICF2P648141            | 68986058 | G | 0    | 0      | A |
| 11 | BICF2P332921            | 68996365 | A | 0.25 | 0.1429 | G |
| 11 | BICF2P1164922           | 69006417 | A | 0.75 | 0.4286 | G |
| 11 | BICF2S23112069          | 69020607 | C | 0    | 0      | A |
| 11 | BICF2P644955            | 69024395 | G | 0.5  | 0.7143 | A |
| 11 | BICF2P591919            | 69041120 | 0 | 0    | 0      | G |
| 11 | BICF2P785198            | 69049353 | G | 0.5  | 0.7143 | A |
| 11 | BICF2S233972            | 69063845 | A | 0.5  | 0.7143 | G |
| 11 | TIGRP2P152148_rs8943064 | 69080348 | A | 0    | 0      | G |



|    |                         |          |   |      |        |   |
|----|-------------------------|----------|---|------|--------|---|
| 11 | BICF2P102529            | 69101460 | A | 0.25 | 0.1429 | C |
| 11 | BICF2P1470720           | 69115094 | A | 0.25 | 0.5714 | C |
| 11 | BICF2P1127381           | 69133359 | G | 0    | 0      | A |
| 11 | BICF2S23553117          | 69143819 | G | 0.5  | 0.2857 | A |
| 11 | BICF2P789189            | 69158038 | G | 0.25 | 0.5714 | A |
| 11 | BICF2P176253            | 69162210 | T | 0.25 | 0.1429 | A |
| 11 | BICF2S23248959          | 69178554 | G | 0.5  | 0.7143 | A |
| 11 | TIGRP2P152154_rs9185072 | 69190078 | G | 0.25 | 0.1429 | A |
| 11 | BICF2S23130480          | 69199517 | C | 0.75 | 0.4286 | A |
| 11 | BICF2P314662            | 69208240 | A | 0    | 0      | G |
| 11 | BICF2P852480            | 69220043 | C | 0    | 0      | A |
| 11 | BICF2S23315293          | 69234566 | G | 0.25 | 0.5714 | A |
| 11 | TIGRP2P152157_rs8838781 | 69243260 | A | 0.75 | 0.4286 | G |
| 11 | TIGRP2P152161_rs9158250 | 69254198 | A | 0.75 | 0.4286 | G |
| 11 | BICF2S232633            | 69267129 | 0 | 0    | 0      | C |
| 11 | BICF2S23715971          | 69281719 | A | 0    | 0      | C |
| 11 | BICF2S2295359           | 69291133 | A | 0    | 0      | G |
| 11 | BICF2S2298815           | 69310574 | A | 0.5  | 0.2857 | G |
| 11 | BICF2P177178            | 69334949 | A | 0    | 0      | G |
| 11 | BICF2S23655353          | 69345277 | A | 0.5  | 0.2857 | G |
| 11 | BICF2P429532            | 69366141 | 0 | 0    | 0      | G |
| 11 | BICF2P1356658           | 69368931 | A | 0    | 0      | G |
| 11 | TIGRP2P152172_rs8926356 | 69399345 | A | 0    | 0      | G |
| 11 | BICF2P1317888           | 69422681 | G | 1    | 1      | A |
| 11 | BICF2P104981            | 69430544 | A | 0    | 0      | T |
| 11 | BICF2S23637805          | 69445240 | 0 | 0    | 0      | A |
| 11 | BICF2P694106            | 69460832 | G | 0    | 0      | C |
| 11 | BICF2S23040831          | 69480428 | T | 0.25 | 0.1429 | A |
| 11 | TIGRP2P152190_rs9248757 | 69483649 | A | 0.25 | 0.1429 | G |
| 11 | TIGRP2P152203_rs9147233 | 69501200 | G | 0.25 | 0.1429 | A |
| 11 | TIGRP2P152208_rs8501565 | 69518881 | A | 0.75 | 0.4286 | G |
| 11 | BICF2S23023483          | 69538636 | A | 1    | 1      | G |
| 11 | BICF2S23742772          | 69544422 | A | 0    | 0      | G |
| 11 | TIGRP2P152212_rs9108430 | 69552138 | 0 | 0    | 0      | C |
| 11 | BICF2P969119            | 69569670 | A | 0.25 | 0.5    | G |
| 11 | BICF2P617861            | 69575728 | 0 | 0    | 0      | C |
| 11 | TIGRP2P152219_rs8562028 | 69587963 | 0 | 0    | 0      | G |
| 11 | BICF2P963447            | 69603661 | 0 | 0    | 0      | A |
| 11 | BICF2G630306667         | 69621954 | G | 0.75 | 0.8571 | A |
| 11 | BICF2G630306679         | 69643458 | A | 0.25 | 0.1429 | G |
| 11 | BICF2G630306682         | 69647830 | G | 0    | 0      | A |
| 11 | BICF2S23247472          | 69677124 | A | 0.25 | 0.1429 | G |
| 11 | BICF2P290073            | 69679692 | G | 0.75 | 0.5    | A |
| 11 | BICF2P290887            | 69685474 | G | 0.75 | 0.5    | A |
| 11 | BICF2G630306730         | 69701205 | 0 | 0    | 0      | G |
| 11 | BICF2G630306745         | 69712146 | G | 0.75 | 0.5    | A |
| 11 | BICF2G630306750         | 69714435 | A | 0.25 | 0.5    | G |

|    |                         |          |   |      |        |   |
|----|-------------------------|----------|---|------|--------|---|
| 11 | BICF2G630306751         | 69724967 | A | NA   | 0      | G |
| 11 | BICF2P390207            | 69737803 | A | 0    | 0      | G |
| 11 | BICF2P1178914           | 69753641 | G | 0    | 0      | A |
| 11 | BICF2G630306787         | 69762993 | A | 0.5  | 0.3571 | G |
| 11 | BICF2P676003            | 69775055 | C | 0.5  | 0.3571 | A |
| 11 | BICF2G630306824         | 69804919 | A | 0.5  | 0.3571 | G |
| 11 | BICF2G630306825         | 69807186 | G | 0.5  | 0.3571 | A |
| 11 | BICF2G630306829         | 69822644 | G | 0.5  | 0.3571 | A |
| 11 | BICF2G630306834         | 69833410 | C | 0.5  | 0.3571 | A |
| 11 | BICF2G630306841         | 69844027 | A | 0.5  | 0.3571 | G |
| 11 | BICF2P244460            | 69861386 | G | 0    | 0      | A |
| 11 | TIGRP2P152270_rs9175629 | 69877426 | A | 0.5  | 0.3571 | G |
| 11 | BICF2P861555            | 69886109 | C | 0    | 0      | A |
| 11 | TIGRP2P152285_rs8721801 | 69922826 | A | 0.25 | 0.2143 | G |
| 11 | BICF2P70321             | 69937223 | G | 0.25 | 0.2143 | C |
| 11 | BICF2P333944            | 69953253 | C | 0.25 | 0.2143 | A |
| 11 | BICF2P83331             | 69956855 | A | 0.75 | 0.7857 | G |
| 11 | TIGRP2P152311_rs8932181 | 69975843 | C | 0.25 | 0.2143 | A |
| 11 | BICF2P950554            | 69985196 | 0 | 0    | 0      | A |
| 11 | TIGRP2P152318_rs9159712 | 69993188 | G | 0.25 | 0.2143 | A |
| 11 | BICF2P1196122           | 70010750 | 0 | 0    | 0      | A |
| 11 | BICF2S23443440          | 70045362 | G | 0    | 0      | A |
| 11 | BICF2P150532            | 70059163 | 0 | 0    | 0      | G |
| 11 | BICF2P933889            | 70073543 | A | 0.75 | 0.7857 | G |
| 11 | BICF2P413232            | 70091862 | A | 0.5  | 0.6429 | G |
| 11 | BICF2P582760            | 70099804 | A | 0.5  | 0.3571 | G |
| 11 | BICF2P63799             | 70104869 | G | 0.5  | 0.3571 | A |
| 11 | TIGRP2P152338_rs8581549 | 70124611 | A | 0    | 0      | G |
| 11 | BICF2P1320271           | 70127954 | G | 0    | 0      | A |
| 11 | TIGRP2P152343_rs8597595 | 70128615 | G | 0    | 0      | A |
| 11 | BICF2P1222317           | 70147162 | G | 0    | 0      | A |
| 11 | BICF2P1239507           | 70153334 | A | 0    | 0      | C |
| 11 | BICF2P89315             | 70163549 | G | 0    | 0      | A |
| 11 | TIGRP2P152356_rs8808184 | 70173684 | G | 0    | 0      | A |
| 11 | BICF2S23713898          | 70185413 | C | 0    | 0      | A |
| 11 | BICF2P176923            | 70200716 | A | 0.5  | 0.3571 | C |
| 11 | TIGRP2P152377_rs9076368 | 70218965 | G | 0    | 0      | A |
| 11 | BICF2P125920            | 70233927 | C | 0.25 | 0.2143 | A |
| 11 | BICF2S23151782          | 70253263 | A | 0    | 0      | G |
| 11 | BICF2P1406886           | 70256494 | A | 0    | 0      | G |
| 11 | BICF2P616706            | 70268434 | A | 0.5  | 0.3571 | G |
| 11 | BICF2P216975            | 70279675 | G | 0.25 | 0.4286 | A |
| 11 | BICF2P132860            | 70288934 | A | 0    | 0      | G |
| 11 | BICF2S23342162          | 70304641 | G | 0.5  | 0.3571 | A |
| 11 | BICF2P1022913           | 70319662 | A | 0.25 | 0.2143 | G |
| 11 | BICF2P1022922           | 70322734 | A | 0    | 0      | G |
| 11 | BICF2P209184            | 70343868 | A | 0.25 | 0.2143 | C |

|    |                         |          |   |      |        |   |
|----|-------------------------|----------|---|------|--------|---|
| 11 | BICF2P767635            | 70385348 | A | 0    | 0      | G |
| 11 | BICF2S23728970          | 70401578 | G | 0.25 | 0.2143 | A |
| 11 | BICF2P981089            | 70413324 | G | 0.25 | 0.2143 | A |
| 11 | BICF2P1111923           | 70419090 | G | 0    | 0      | A |
| 11 | BICF2P65250             | 70427546 | G | 0.25 | 0.2143 | A |
| 11 | BICF2P734672            | 70438792 | A | 0.25 | 0.4286 | G |
| 11 | BICF2P1225697           | 70460476 | C | 0.25 | 0.4286 | G |
| 11 | BICF2P1225707           | 70462489 | A | 0.25 | 0.4286 | G |
| 11 | TIGRP2P152435_rs8629120 | 70487655 | 0 | 0    | 0      | G |
| 11 | BICF2P293463            | 70495965 | A | 0    | 0      | G |
| 11 | BICF2S2447270           | 70503443 | A | 0    | 0      | G |
| 11 | G720f22S62              | 70519160 | 0 | 0    | 0      | A |
| 11 | BICF2P1162516           | 70549528 | A | 0    | 0      | G |
| 11 | TIGRP2P152450_rs8971311 | 70562584 | G | 0.25 | 0.2143 | A |
| 11 | BICF2P1414858           | 70578183 | A | 0.75 | 0.7857 | G |
| 11 | BICF2P693692            | 70588982 | A | 0.75 | 0.7857 | C |
| 11 | TIGRP2P152459_rs9079012 | 70609068 | G | 0    | 0      | A |
| 11 | BICF2P85936             | 70621129 | G | 0    | 0      | A |
| 11 | TIGRP2P152465_rs9201419 | 70623318 | G | 0    | 0      | A |
| 11 | BICF2P866615            | 70641581 | T | 0    | 0      | A |
| 11 | BICF2P474647            | 70650732 | G | 0.25 | 0.2143 | A |
| 11 | TIGRP2P152473_rs8565826 | 70656971 | A | 0    | 0      | G |
| 11 | BICF2P424850            | 70668123 | G | 0    | 0      | A |
| 11 | BICF2P976394            | 70681118 | G | 0    | 0      | A |
| 11 | BICF2P1247677           | 70700222 | A | 0.75 | 0.7857 | G |
| 11 | BICF2S23656403          | 70702225 | A | 0.75 | 0.7857 | G |
| 11 | TIGRP2P152492_rs9200277 | 70714393 | A | 0    | 0      | G |
| 11 | BICF2S22939906          | 70726642 | A | 0.25 | 0.2143 | G |
| 11 | BICF2S23161679          | 70758906 | A | 0    | 0      | G |
| 11 | BICF2S23532960          | 70760338 | G | 0    | 0      | A |
| 11 | BICF2P1439354           | 70799679 | A | 0.5  | 0.6429 | G |
| 11 | BICF2P798524            | 70807803 | A | 0.25 | 0.2143 | G |
| 11 | BICF2S22961403          | 70824281 | A | 0.25 | 0.2143 | G |
| 11 | BICF2P1440369           | 70829086 | A | 0.5  | 0.6667 | G |
| 11 | BICF2P1403054           | 70841634 | G | 0    | 0      | A |
| 11 | BICF2P405890            | 70862378 | A | 0    | 0      | G |
| 11 | TIGRP2P152528_rs8622499 | 70872927 | A | 0    | 0      | G |
| 11 | BICF2P1121055           | 70883109 | 0 | 0    | 0      | C |
| 11 | BICF2P327891            | 70890572 | 0 | 0    | 0      | A |
| 11 | BICF2P85632             | 70907305 | C | 0    | 0      | A |
| 11 | BICF2P433893            | 70913592 | A | 0    | 0      | G |
| 11 | BICF2P471239            | 70942781 | C | 0.25 | 0.2143 | A |
| 11 | BICF2S23538318          | 70950276 | G | 0.75 | 0.5714 | A |
| 11 | TIGRP2P152570_rs9168295 | 70969609 | G | 0.75 | 0.5714 | A |
| 11 | BICF2S22944567          | 70985695 | G | 1    | 0.5714 | A |
| 11 | TIGRP2P152593_rs8812362 | 70991680 | A | 0.25 | 0.4286 | C |
| 11 | BICF2P29017             | 71009460 | G | 0.25 | 0.2143 | A |

|    |                         |          |   |      |        |   |
|----|-------------------------|----------|---|------|--------|---|
| 11 | BICF2S23417809          | 71013919 | G | 1    | 1      | A |
| 11 | BICF2P1152059           | 71025991 | A | 0    | 0      | G |
| 11 | BICF2P1444199           | 71037783 | G | 0.25 | 0.2143 | A |
| 11 | BICF2P759784            | 71047337 | A | 0.25 | 0.2143 | C |
| 11 | BICF2S23344766          | 71068045 | G | 0.25 | 0.2143 | A |
| 11 | BICF2S22924871          | 71074453 | A | 0    | 0      | G |
| 11 | BICF2P1049438           | 71091329 | A | 1    | 1      | G |
| 11 | BICF2P670069            | 71094355 | A | 0    | 0      | G |
| 11 | BICF2S2368077           | 71108400 | G | 0.5  | 0.6429 | A |
| 11 | BICF2P520176            | 71117514 | G | 0.5  | 0.6429 | A |
| 11 | BICF2P1221112           | 71128848 | G | 0.5  | 0.3333 | A |
| 11 | BICF2S23549389          | 71166278 | T | 0.5  | 0.5    | A |
| 11 | BICF2S2336914           | 71181435 | G | 0.25 | 0.2143 | A |
| 11 | BICF2P1106001           | 71192456 | A | 0.25 | 0.2857 | G |
| 11 | TIGRP2P152666_rs8763240 | 71202237 | A | 0.5  | 0.5    | G |
| 11 | BICF2P156702            | 71210103 | G | 0    | 0.1429 | A |
| 11 | BICF2P420164            | 71213676 | G | 0    | 0.1429 | A |
| 11 | BICF2S23658613          | 71227505 | A | 0    | 0      | G |
| 11 | BICF2P401410            | 71260488 | G | 0    | 0      | A |
| 11 | BICF2S23025283          | 71267856 | G | 0.5  | 0.6429 | A |
| 11 | BICF2P1383108           | 71281673 | C | 0.5  | 0.5    | G |
| 11 | BICF2P852326            | 71308647 | A | 0.25 | 0.2143 | G |
| 11 | BICF2P1149744           | 71319056 | C | 0    | 0      | A |
| 11 | BICF2P516167            | 71328179 | A | 0.5  | 0.3571 | G |
| 11 | BICF2P1013392           | 71339307 | 0 | 0    | 0      | C |
| 11 | BICF2S23044709          | 71349862 | G | 0.5  | 0.3571 | A |
| 11 | BICF2P759856            | 71360535 | 0 | 0    | 0      | G |
| 11 | BICF2P878630            | 71378025 | G | 0.75 | 0.7857 | A |
| 11 | BICF2S22957696          | 71388156 | A | 0    | 0      | C |
| 11 | BICF2P559200            | 71402160 | C | 1    | 0.8571 | A |
| 11 | BICF2P528844            | 71405890 | G | 0    | 0.1429 | A |
| 11 | BICF2P1369165           | 71426928 | G | 0.25 | 0.4286 | A |
| 11 | BICF2P646953            | 71446660 | A | 0    | 0      | G |
| 11 | BICF2P646950            | 71447358 | A | 0    | 0      | G |
| 11 | BICF2P1041447           | 71452258 | A | 0.25 | 0.4286 | G |
| 11 | BICF2P1362373           | 71464784 | A | 0.25 | 0.2857 | G |
| 11 | BICF2P190296            | 71472607 | A | 0.75 | 0.5714 | G |
| 11 | BICF2P1317801           | 71485985 | A | 0    | 0      | G |
| 11 | BICF2P782106            | 71501451 | A | 0.25 | 0.4286 | G |
| 11 | BICF2S23353375          | 71517224 | A | 0.75 | 0.5714 | C |
| 11 | BICF2P482199            | 71524550 | G | 0.25 | 0.3571 | C |
| 11 | BICF2P581766            | 71536142 | A | 0    | 0      | G |
| 11 | BICF2P1284131           | 71543367 | A | 0    | 0.1429 | G |
| 11 | BICF2P625812            | 71555966 | 0 | 0    | 0      | C |
| 11 | BICF2P773417            | 71568013 | A | 0.25 | 0.3571 | G |
| 11 | BICF2P592354            | 71577551 | 0 | 0    | 0      | G |
| 11 | BICF2P427368            | 71590374 | A | 0    | 0      | G |

|    |                         |          |   |      |        |   |
|----|-------------------------|----------|---|------|--------|---|
| 11 | BICF2P1225523           | 71600056 | A | 0    | 0      | G |
| 11 | TIGRP2P152855_rs8964945 | 71619756 | A | 0    | 0      | G |
| 11 | BICF2P877426            | 71626695 | C | 0    | 0.1429 | A |
| 11 | BICF2P1090889           | 71645119 | C | 0    | 0      | A |
| 11 | BICF2P187019            | 71660790 | C | 0.25 | 0.2143 | A |
| 11 | BICF2P480550            | 71676384 | A | 0.25 | 0.4286 | G |
| 11 | BICF2P214429            | 71682108 | A | 0    | 0      | G |
| 11 | BICF2S23256628          | 71695361 | A | 0.75 | 0.6429 | G |
| 11 | BICF2S22923722          | 71706875 | G | 0.25 | 0.4286 | A |
| 11 | BICF2P955934            | 71720598 | O | 0    | 0      | A |
| 11 | BICF2P967357            | 71732636 | T | 0    | 0.1429 | A |
| 11 | BICF2S23351625          | 71737352 | A | 0    | 0.1429 | G |
| 11 | BICF2P682006            | 71751765 | O | 0    | 0      | G |
| 11 | BICF2P999859            | 71765184 | C | 0    | 0      | A |
| 11 | BICF2S23421088          | 71777952 | C | 1    | 1      | A |
| 11 | BICF2S2321945           | 71795046 | A | 0.25 | 0.2857 | G |
| 11 | BICF2S23211160          | 71815282 | A | 0.25 | 0.2857 | T |
| 11 | BICF2S2367637           | 71818030 | C | 0.5  | 0.5    | A |
| 11 | BICF2S23618225          | 71821424 | A | 0.25 | 0.3571 | G |
| 11 | TIGRP2P153002_rs8702595 | 71833208 | O | 0    | 0      | G |
| 11 | BICF2P1249136           | 71843346 | A | 0.25 | 0.2143 | G |
| 11 | BICF2P968910            | 71855058 | A | 0    | 0      | G |
| 11 | BICF2S23632411          | 71864087 | A | 0.25 | 0.2143 | G |
| 11 | BICF2P268233            | 71896237 | G | 0    | 0      | A |
| 11 | TIGRP2P153022_rs8608014 | 71904914 | A | 0    | 0      | G |
| 11 | TIGRP2P153024_rs8885168 | 71913764 | A | 0.25 | 0.4286 | G |
| 11 | BICF2P342417            | 71920751 | G | 0.25 | 0.4286 | A |
| 11 | BICF2P947235            | 71922006 | C | 0.25 | 0.4286 | A |
| 11 | BICF2P1230943           | 71937333 | A | 0    | 0      | G |
| 11 | BICF2S23228939          | 71952258 | A | 0.75 | 0.6429 | G |
| 11 | BICF2P857756            | 71958801 | A | 0.25 | 0.2143 | G |
| 11 | BICF2P156051            | 71974638 | A | 0.25 | 0.2143 | G |
| 11 | BICF2P286943            | 71980149 | G | 0.75 | 0.7857 | A |
| 11 | TIGRP2P153063_rs8600422 | 71996144 | O | 0    | 0      | A |
| 11 | BICF2P550138            | 72014353 | G | 0    | 0      | A |
| 11 | BICF2S23324760          | 72030862 | A | 0.5  | 0.3571 | G |
| 11 | TIGRP2P153086_rs8903754 | 72038895 | O | 0    | 0      | A |
| 11 | TIGRP2P153092_rs9229977 | 72049036 | G | 0    | 0.1429 | A |
| 11 | BICF2P321374            | 72059674 | A | 0    | 0.4286 | G |
| 11 | BICF2P889820            | 72070527 | A | 0    | 0      | C |
| 11 | BICF2S22921927          | 72091943 | A | 0.25 | 0.3571 | C |
| 11 | BICF2P341803            | 72100367 | A | 0.25 | 0.3571 | G |
| 11 | BICF2S2302305           | 72108416 | G | 0.25 | 0.2143 | A |
| 11 | BICF2P313487            | 72115263 | A | 0.5  | 0.3571 | G |
| 11 | BICF2P987381            | 72127504 | G | 0.25 | 0.4286 | A |
| 11 | BICF2P196323            | 72134469 | A | 0    | 0      | G |
| 11 | TIGRP2P153210_rs8848930 | 72141083 | A | 0.75 | 0.7857 | G |

|    |                         |          |   |      |        |   |
|----|-------------------------|----------|---|------|--------|---|
| 11 | BICF2G630306865         | 72164282 | A | 0    | 0      | G |
| 11 | BICF2P894582            | 72180839 | A | 0.25 | 0.2857 | G |
| 11 | TIGRP2P153236_rs8798086 | 72188966 | G | 0.25 | 0.2857 | A |
| 11 | TIGRP2P153239_rs9202108 | 72197836 | A | 0.5  | 0.6429 | G |
| 11 | BICF2S23446917          | 72212959 | A | 0    | 0      | G |
| 11 | BICF2P539594            | 72227517 | A | 0    | 0      | C |
| 11 | TIGRP2P153246_rs8906130 | 72236071 | A | 0.5  | 0.3333 | G |
| 11 | BICF2P560672            | 72244409 | A | 0    | 0      | G |
| 11 | BICF2P30914             | 72256650 | A | 0    | 0      | G |
| 11 | BICF2P1088170           | 72263159 | A | 0    | 0      | G |
| 11 | TIGRP2P153268_rs8514443 | 72267374 | A | 0    | 0      | C |
| 11 | BICF2P1167407           | 72278361 | A | 0    | 0      | G |
| 11 | BICF2P51703             | 72289644 | C | 0    | 0      | A |
| 11 | BICF2P956000            | 72293400 | G | 0.25 | 0.4286 | A |
| 11 | TIGRP2P153295_rs9164620 | 72302465 | G | 0    | 0      | A |
| 11 | BICF2P1396193           | 72318315 | A | 0    | 0      | C |
| 11 | TIGRP2P153309_rs8755961 | 72327662 | G | 0    | 0      | A |
| 11 | BICF2P1413358           | 72340680 | A | 0    | 0      | G |
| 11 | TIGRP2P153317_rs8632754 | 72352471 | A | 0    | 0.1429 | G |
| 11 | BICF2P1136768           | 72371760 | A | 1    | 0.8571 | G |
| 11 | BICF2P590188            | 72381093 | 0 | 0    | 0      | A |
| 11 | BICF2S23016228          | 72392904 | C | 0    | 0      | A |
| 11 | BICF2P514142            | 72407491 | C | 1    | 0.8571 | G |
| 11 | BICF2P801750            | 72428260 | A | 0    | 0      | G |
| 11 | TIGRP2P153358_rs9172165 | 72438807 | 0 | 0    | 0      | A |
| 11 | BICF2S23518067          | 72452598 | A | 1    | 0.8571 | G |
| 11 | BICF2S2304129           | 72471087 | A | 0    | 0      | G |
| 11 | BICF2P142016            | 72480774 | G | 0.25 | 0.2143 | A |
| 11 | BICF2P736609            | 72488829 | G | 0    | 0.1429 | A |
| 11 | BICF2P970535            | 72514090 | A | 0.5  | 0.5    | G |
| 11 | BICF2P1444698           | 72533824 | G | 0.5  | 0.3571 | A |
| 11 | BICF2P1175838           | 72552740 | A | 0    | 0      | G |
| 11 | BICF2P719729            | 72561873 | G | 0.25 | 0.2143 | A |
| 11 | BICF2P1247543           | 72571358 | A | 0    | 0.2143 | G |
| 11 | BICF2P73783             | 72579556 | C | 0.25 | 0.2143 | A |
| 11 | BICF2P495533            | 72588965 | 0 | 0    | 0      | G |
| 11 | BICF2P855172            | 72605032 | G | 0    | 0.1429 | A |
| 11 | BICF2P871149            | 72605864 | 0 | 0    | 0      | A |
| 11 | BICF2S23344916          | 72614822 | G | 0.5  | 0.2857 | A |
| 11 | TIGRP2P153419_rs8588049 | 72627876 | G | 0.5  | 0.2857 | A |
| 11 | BICF2P312771            | 72644118 | 0 | 0    | 0      | A |
| 11 | TIGRP2P153429_rs8599395 | 72650707 | A | 0.75 | 0.5714 | G |
| 11 | BICF2P423734            | 72666193 | G | 0.75 | 0.5714 | A |
| 11 | BICF2P1335372           | 72668866 | A | 0    | 0      | G |
| 11 | BICF2P249317            | 72681282 | G | 0.75 | 0.5714 | A |
| 11 | TIGRP2P153440_rs9185586 | 72696540 | A | 0.75 | 0.5714 | G |
| 11 | BICF2S22931094          | 72703860 | G | 0    | 0      | A |

|    |                         |          |   |      |        |   |
|----|-------------------------|----------|---|------|--------|---|
| 11 | BICF2P469598            | 72723108 | A | 0    | 0      | G |
| 11 | BICF2P197224            | 72731967 | C | 0.75 | 0.5714 | G |
| 11 | BICF2S23642328          | 72748114 | G | 0.5  | 0.5    | A |
| 11 | BICF2P1291088           | 72752083 | A | 0    | 0      | G |
| 11 | BICF2S2365774           | 72766409 | A | 0    | 0      | G |
| 11 | BICF2S23550747          | 72780324 | A | 0.5  | 0.5    | G |
| 11 | BICF2P864943            | 72787111 | G | 0.25 | 0.2857 | C |
| 11 | BICF2P908442            | 72797055 | A | 0    | 0      | G |
| 11 | BICF2P156463            | 72810903 | G | 0    | 0      | A |
| 11 | BICF2P302327            | 72826126 | 0 | 0    | 0      | A |
| 11 | BICF2S2398685           | 72832472 | A | 0    | 0      | C |
| 11 | TIGRP2P153477_rs9054496 | 72844876 | C | 0    | 0.2143 | A |
| 11 | BICF2S2355132           | 72852967 | A | 0.25 | 0.2143 | G |
| 11 | BICF2P552413            | 72865692 | G | 0.5  | 0.5    | A |
| 11 | BICF2P433582            | 72879058 | C | 0.5  | 0.5    | A |
| 11 | BICF2S22955499          | 72891577 | G | 0    | 0      | A |
| 11 | BICF2S23237061          | 72903965 | A | 0    | 0      | G |
| 11 | TIGRP2P153512_rs9236093 | 72921490 | A | 0    | 0      | G |
| 11 | BICF2P1143254           | 72943336 | A | 0    | 0      | G |
| 11 | BICF2P276238            | 72945483 | A | 0.75 | 0.5714 | C |
| 11 | BICF2P210691            | 72957735 | 0 | 0    | 0      | G |
| 11 | BICF2P337239            | 73004100 | 0 | 0    | 0      | C |
| 11 | BICF2P1342363           | 73018654 | G | 0.25 | 0.4286 | A |
| 11 | BICF2S23357023          | 73030487 | G | 0.5  | 0.7143 | A |
| 11 | TIGRP2P153531_rs9159611 | 73047517 | G | 0.75 | 0.5714 | A |
| 11 | BICF2P842107            | 73058126 | A | 0.75 | 0.5714 | C |
| 11 | TIGRP2P153551_rs8874226 | 73059861 | G | 0    | 0      | A |
| 11 | BICF2P58150             | 73074272 | G | 0.25 | 0.2857 | A |
| 11 | BICF2P214733            | 73090192 | T | 0    | 0      | A |
| 11 | BICF2P779255            | 73097995 | A | 0    | 0      | T |
| 11 | BICF2P317288            | 73106027 | G | 0    | 0      | A |
| 11 | BICF2S23530197          | 73117674 | G | 0    | 0      | A |
| 11 | BICF2P955386            | 73156395 | A | 0    | 0      | G |
| 11 | BICF2P456137            | 73160444 | A | 0    | 0      | G |
| 11 | BICF2P459464            | 73165556 | 0 | 0    | 0      | G |
| 11 | BICF2P356708            | 73180889 | A | 0    | 0      | G |
| 11 | BICF2P1274751           | 73188942 | A | 0    | 0      | G |
| 11 | TIGRP2P153590_rs8566089 | 73204100 | A | 0.25 | 0.4286 | G |
| 11 | BICF2P902124            | 73216265 | A | 0    | 0      | G |
| 11 | BICF2P963063            | 73231284 | A | 0    | 0      | G |
| 11 | BICF2P911828            | 73233408 | G | 0    | 0      | A |
| 11 | BICF2P518909            | 73249670 | 0 | 0    | 0      | A |
| 11 | BICF2P1032688           | 73260838 | 0 | 0    | 0      | G |
| 11 | BICF2P1455890           | 73268283 | G | 1    | 0.7857 | A |
| 11 | TIGRP2P153614_rs8892228 | 73300572 | A | 0.5  | 0.2857 | G |
| 11 | BICF2P627725            | 73324757 | G | 0.75 | 0.5    | A |
| 11 | BICF2S2451353           | 73341140 | G | 0.75 | 0.5    | A |

|    |                         |          |   |      |        |   |
|----|-------------------------|----------|---|------|--------|---|
| 11 | BICF2S23743965          | 73350755 | C | 0.75 | 0.5    | A |
| 11 | BICF2P1084064           | 73369833 | A | 0.75 | 0.8333 | G |
| 11 | BICF2P373967            | 73371391 | A | 0.5  | 0.2857 | G |
| 11 | BICF2P651659            | 73394890 | A | 0.25 | 0.2143 | G |
| 11 | BICF2P690908            | 73427344 | G | 0    | 0      | A |
| 11 | BICF2P615607            | 73433111 | A | 0.5  | 0.2857 | G |
| 11 | TIGRP2P153660_rs9068386 | 73447381 | G | 0    | 0      | A |
| 11 | BICF2S23353756          | 73457377 | G | 0.5  | 0.2857 | A |
| 11 | BICF2P1173832           | 73462161 | G | 0.5  | 0.2857 | A |
| 11 | TIGRP2P153677_rs8695711 | 73466518 | A | 0.5  | 0.2857 | G |
| 11 | BICF2P963961            | 73492308 | 0 | 0    | 0      | G |
| 11 | BICF2P1061566           | 73497691 | A | 0.5  | 0.7143 | G |
| 11 | BICF2P222114            | 73501917 | A | 0    | 0      | G |
| 11 | TIGRP2P153712_rs8600410 | 73510281 | G | 0.25 | 0.5    | A |
| 11 | BICF2P657251            | 73530520 | G | 0    | 0      | A |
| 11 | BICF2S24413727          | 73531562 | G | 0.5  | 0.2857 | A |
| 11 | BICF2P1253108           | 73543219 | A | 0.75 | 0.7857 | G |
| 11 | BICF2G630306887         | 73570433 | G | 0    | 0      | A |
| 11 | BICF2G630306896         | 73584905 | 0 | 0    | 0      | A |
| 11 | BICF2G630306909         | 73591010 | G | 0.75 | 0.7857 | C |
| 11 | BICF2G630306942         | 73609011 | A | 0    | 0      | G |
| 11 | BICF2G630306962         | 73621493 | G | 0    | 0      | A |
| 11 | BICF2G630306972         | 73625447 | A | 0.25 | 0.5    | C |
| 11 | BICF2S2351966           | 73627258 | C | 1    | 1      | A |
| 11 | BICF2G630307001         | 73638372 | G | 0.5  | 0.2857 | A |
| 11 | BICF2P152084            | 73647126 | A | 0.25 | 0.5    | C |
| 11 | BICF2G630307068         | 73661151 | A | 0.25 | 0.5    | G |
| 11 | BICF2G630307095         | 73675343 | A | 0.25 | 0.5    | G |
| 11 | BICF2G630307116         | 73686443 | T | 0.5  | 0.2857 | A |
| 11 | BICF2P635181            | 73695223 | A | 0    | 0      | G |
| 11 | BICF2G630307161         | 73714104 | A | 0    | 0      | G |
| 11 | BICF2G630307173         | 73719724 | C | NA   | 0      | A |
| 11 | BICF2G630307199         | 73728220 | C | 0.5  | 0.2857 | A |
| 11 | BICF2G630307228         | 73747457 | A | 0.5  | 0.7143 | C |
| 11 | BICF2G630307231         | 73751405 | A | 0.5  | 0.2857 | G |
| 11 | BICF2G630307273         | 73769615 | G | 0.5  | 0.7143 | A |
| 11 | BICF2P693398            | 73772058 | A | 1    | 1      | G |
| 11 | BICF2P693403            | 73772860 | A | 1    | 1      | G |
| 11 | TIGRP2P153773_rs8799996 | 73790247 | 0 | 0    | 0      | C |
| 11 | BICF2P964273            | 73798309 | G | 0    | 0      | A |
| 11 | BICF2P902726            | 73807772 | C | 0    | 0      | A |
| 11 | BICF2G630307319         | 73829868 | C | 0    | 0.2143 | G |
| 11 | TIGRP2P153782_rs9091564 | 73837102 | A | 0    | 0.2143 | G |
| 11 | BICF2P929094            | 73843256 | G | 0    | 0      | A |
| 11 | BICF2S23036466          | 73866070 | A | 0    | 0      | G |
| 11 | BICF2P469475            | 73880045 | A | 0    | 0.2143 | G |
| 11 | BICF2G630307364         | 73886141 | G | 0.75 | 0.5714 | A |



|    |                         |          |   |      |        |   |
|----|-------------------------|----------|---|------|--------|---|
| 11 | BICF2G630307384         | 73894170 | A | 0.75 | 0.5714 | G |
| 11 | BICF2G630307410         | 73902866 | G | 0    | 0.2143 | A |
| 11 | BICF2G630307423         | 73918063 | A | 0    | 0.2143 | G |
| 11 | BICF2G630307429         | 73932576 | G | 0    | 0      | A |
| 11 | BICF2P1402695           | 73950502 | A | 0    | 0.2143 | G |
| 11 | BICF2G630307430         | 73960307 | C | 1    | 0.7857 | A |
| 11 | BICF2G630307459         | 73974228 | A | 0    | 0      | G |
| 11 | BICF2G630307473         | 73981377 | G | 0.5  | 0.2857 | A |
| 11 | BICF2G630307490         | 73997153 | G | 0.75 | 0.7857 | A |
| 11 | BICF2G630307499         | 74011172 | A | 0    | 0      | G |
| 11 | BICF2P271514            | 74014802 | G | 0.25 | 0.2143 | A |
| 11 | TIGRP2P153825_rs9220227 | 74028283 | T | 0.75 | 0.5714 | A |
| 11 | BICF2S22949291          | 74029868 | A | 0.25 | 0.2143 | G |
| 11 | BICF2P60853             | 74030530 | A | 0    | 0.2143 | G |
| 11 | BICF2G630307539         | 74038341 | G | 0.75 | 0.7857 | A |
| 11 | BICF2S236655            | 74057155 | A | 0    | 0.2143 | G |
| 11 | BICF2G630307599         | 74063355 | G | 1    | 0.7857 | A |
| 11 | BICF2S2307595           | 74064546 | G | 0    | 0      | A |
| 11 | BICF2P953363            | 74073955 | A | 0.75 | 0.7857 | G |
| 11 | TIGRP2P153849_rs9157404 | 74083881 | A | 0    | 0      | G |
| 11 | BICF2P1220826           | 74102636 | A | 0.25 | 0.4286 | G |
| 11 | BICF2P910441            | 74108591 | A | 0    | 0      | G |
| 11 | BICF2G630307645         | 74120184 | C | 0    | 0      | A |
| 11 | BICF2G630307659         | 74137989 | G | 0.75 | 0.5714 | C |
| 11 | BICF2S22942017          | 74140178 | A | 0    | 0      | C |
| 11 | BICF2P1441939           | 74141207 | A | 0.75 | 0.5714 | G |
| 11 | BICF2G630307678         | 74152475 | A | 0.5  | 0.5    | C |
| 11 | BICF2P634771            | 74157073 | G | 0    | 0      | A |
| 11 | TIGRP2P153888_rs9205702 | 74164330 | G | 0    | 0      | A |
| 11 | BICF2P296806            | 74180812 | G | 0.25 | 0.4286 | A |
| 11 | TIGRP2P153896_rs8574672 | 74190655 | A | 0    | 0      | G |
| 11 | BICF2S2317580           | 74201157 | A | 0    | 0      | G |
| 11 | BICF2G630307727         | 74213361 | A | 0    | 0      | G |
| 11 | BICF2G630307764         | 74224229 | A | 1    | 1      | G |
| 11 | BICF2G630307797         | 74236584 | A | 0    | 0      | G |
| 11 | BICF2G630307811         | 74244699 | A | 0.25 | 0.4286 | G |
| 11 | BICF2G630307853         | 74258966 | A | 0    | 0      | G |
| 11 | BICF2G630307883         | 74273053 | A | 1    | 1      | T |
| 11 | TIGRP2P153912_rs8552878 | 74280974 | G | 1    | 1      | A |
| 11 | BICF2S2344488           | 74294747 | A | 0.75 | 0.5714 | G |
| 11 | BICF2G630307884         | 74308058 | A | 0.25 | 0.4286 | G |
| 11 | BICF2P292855            | 74314615 | 0 | 0    | 0      | C |
| 11 | BICF2P798307            | 74332784 | A | 0    | 0      | G |
| 11 | BICF2G630307911         | 74335015 | A | 1    | 1      | G |
| 11 | BICF2P276107            | 74340734 | A | 0.75 | 0.7857 | G |
| 11 | BICF2G630307924         | 74352962 | C | 0    | 0      | A |
| 11 | BICF2G630307930         | 74355973 | A | 0    | 0      | G |

|    |                         |          |   |      |        |   |
|----|-------------------------|----------|---|------|--------|---|
| 11 | TIGRP2P153940_rs8972812 | 74364417 | G | 0    | 0      | A |
| 11 | BICF2P1431977           | 74377021 | A | 0    | 0      | G |
| 11 | BICF2P1431974           | 74377567 | G | 0    | 0      | A |
| 11 | BICF2P1254122           | 74385009 | G | 1    | 0.7857 | A |
| 11 | BICF2G630307966         | 74393560 | G | 0    | 0.1667 | A |
| 11 | BICF2P642727            | 74405691 | 0 | 0    | 0      | G |
| 11 | BICF2P643111            | 74408632 | A | 1    | 0.7857 | G |
| 11 | BICF2S23111508          | 74410476 | C | 0    | 0      | G |
| 11 | TIGRP2P153976_rs9046209 | 74423262 | G | 1    | 0.7857 | A |
| 11 | BICF2S23334345          | 74436970 | A | 0.25 | 0.2143 | T |
| 11 | BICF2S23334346          | 74437232 | C | 0.25 | 0.2143 | A |
| 11 | BICF2G630307972         | 74440105 | G | 0.25 | 0.2143 | A |
| 11 | BICF2P275941            | 74454348 | A | 0    | 0      | C |
| 11 | TIGRP2P153986_rs9217231 | 74465644 | A | 0.25 | 0.2143 | G |
| 11 | BICF2G630307993         | 74475570 | A | 0.25 | 0.2143 | G |
| 11 | BICF2P731554            | 74485768 | A | 0.75 | 0.5714 | G |
| 11 | TIGRP2P153995_rs8849553 | 74503374 | 0 | 0    | 0      | A |
| 11 | BICF2G630308042         | 74515351 | A | 1    | 1      | G |
| 11 | BICF2G630308065         | 74520132 | G | 0    | 0.2143 | A |
| 11 | BICF2G630308106         | 74542838 | A | 0    | 0      | G |
| 11 | BICF2G630308141         | 74559182 | C | 0.75 | 0.5714 | A |
| 11 | BICF2P1327720           | 74567568 | G | 0    | 0      | C |
| 11 | BICF2G630308175         | 74575227 | A | 0.25 | 0.2143 | G |
| 11 | BICF2G630308194         | 74586691 | C | 0    | 0      | A |
| 11 | BICF2G630308196         | 74589290 | A | 0    | 0.2143 | G |
| 11 | BICF2P264945            | 74604833 | 0 | 0    | 0      | G |
| 11 | BICF2S2298714           | 74614662 | C | 0    | 0      | A |
| 11 | BICF2G630308228         | 74632402 | C | 0    | 0      | G |
| 11 | BICF2G630308236         | 74636256 | 0 | 0    | 0      | G |
| 11 | BICF2G630308268         | 74646875 | G | 0.75 | 0.5714 | A |
| 11 | BICF2G630308301         | 74658707 | A | 0.25 | 0.4286 | C |
| 11 | TIGRP2P154065_rs8642031 | 74672619 | T | 0.25 | 0.2857 | A |
| 11 | BICF2G630308352         | 74682811 | A | 0.75 | 0.5714 | G |
| 11 | BICF2G630308390         | 74693181 | C | 0    | 0      | G |
| 11 | BICF2G630308422         | 74713349 | C | 0    | 0      | A |
| 11 | BICF2P1225513           | 74720219 | G | 0    | 0      | A |
| 11 | BICF2G630308434         | 74730233 | G | 0    | 0      | A |
| 11 | BICF2G630308447         | 74738862 | G | 0    | 0      | A |
| 11 | TIGRP2P154075_rs8618839 | 74751831 | 0 | 0    | 0      | A |
| 11 | BICF2G630308481         | 74772589 | G | 0    | 0      | A |
| 11 | BICF2G630308483         | 74775738 | A | 0    | 0      | C |
| 11 | BICF2G630308502         | 74784860 | G | 0    | 0      | A |
| 11 | BICF2G630308538         | 74802423 | G | 0    | 0      | A |
| 11 | BICF2G630308560         | 74810795 | G | 0    | 0      | A |
| 11 | BICF2P241985            | 74821270 | A | 0.25 | 0.4286 | G |
| 11 | BICF2P269278            | 74834179 | A | 0    | 0      | G |
| 11 | BICF2S23121788          | 74864568 | 0 | 0    | 0      | G |

|    |                         |          |   |      |        |   |
|----|-------------------------|----------|---|------|--------|---|
| 11 | BICF2P847648            | 74891631 | 0 | 0    | 0      | G |
| 11 | BICF2S22929936          | 74911463 | G | 0    | 0      | A |
| 11 | BICF2G630308581         | 74929562 | G | 0.25 | 0.4286 | A |
| 11 | BICF2G630308585         | 74938075 | G | 0.25 | 0.2857 | A |
| 11 | BICF2G630308598         | 74948326 | G | 0.25 | 0.2857 | A |
| 11 | BICF2P1372005           | 74962392 | A | 0.5  | 0.2857 | C |
| 11 | BICF2S24111676          | 74976432 | A | 0.5  | 0.2857 | G |
| 11 | BICF2G630308606         | 74981626 | A | 0.75 | 0.7143 | G |
| 11 | BICF2P552813            | 74994236 | G | 0.25 | 0.4286 | A |
| 11 | BICF2P1267841           | 75010057 | A | 0.75 | 0.5714 | G |
| 11 | BICF2P281460            | 75017326 | G | 0.25 | 0.4286 | A |
| 11 | TIGRP2P154099_rs9136774 | 75030322 | 0 | 0    | 0      | A |
| 11 | BICF2S23330335          | 75050575 | G | 0    | 0      | A |
| 11 | BICF2S23249964          | 75071514 | G | 0    | 0      | A |
| 11 | BICF2P644919            | 75078376 | A | 0.25 | 0.4286 | G |
| 11 | TIGRP2P154102_rs8941833 | 75091196 | 0 | 0    | 0      | G |
| 11 | BICF2S23421031          | 75095302 | A | 0.5  | 0.75   | C |
| 11 | BICF2P1055231           | 75110282 | G | 1    | 1      | A |
| 11 | BICF2P251025            | 75126025 | 0 | 0    | 0      | C |
| 11 | BICF2P486290            | 75138621 | A | 0.75 | 0.5714 | G |
| 11 | BICF2P253948            | 75147593 | A | 0.25 | 0.4286 | G |
| 11 | TIGRP2P154131_rs8728484 | 75152722 | 0 | 0    | 0      | A |
| 11 | BICF2S22912258          | 75175363 | A | 0.25 | 0.2857 | G |
| 11 | BICF2P383001            | 75194287 | G | 0.5  | 0.75   | A |
| 11 | BICF2P312044            | 75199181 | G | 0.5  | 0.7143 | A |
| 11 | TIGRP2P154134_rs8937238 | 75216521 | G | 0.25 | 0.2857 | A |
| 11 | BICF2S2375539           | 75224726 | A | 0.25 | 0.2857 | G |
| 11 | BICF2P973781            | 75237548 | G | 0.5  | 0.2857 | A |
| 11 | BICF2G630308612         | 75243852 | 0 | 0    | 0      | G |
| 11 | BICF2P956046            | 75245839 | A | 0.5  | 0.2857 | G |
| 11 | BICF2P1365115           | 75257993 | T | 0.5  | 0.2857 | A |
| 11 | BICF2P414186            | 75274903 | G | 0.5  | 0.7143 | A |
| 11 | BICF2G630308623         | 75282118 | G | 0    | 0      | A |
| 11 | BICF2G630308646         | 75292032 | A | 0    | 0      | G |
| 11 | TIGRP2P154161_rs9183378 | 75307502 | T | 0.5  | 0.2857 | A |
| 11 | TIGRP2P154165_rs9144510 | 75314284 | A | 0.5  | 0.2857 | G |
| 11 | BICF2G630308704         | 75324064 | G | 0.5  | 0.7143 | A |
| 11 | BICF2P718394            | 75325792 | A | 0.5  | 0.2857 | G |
| 11 | BICF2S23020876          | 75338861 | G | 0    | 0      | A |
| 11 | BICF2G630308756         | 75357343 | A | 0    | 0      | G |
| 11 | TIGRP2P154185_rs9218496 | 75359530 | C | 0    | 0      | A |
| 11 | BICF2G630308773         | 75373635 | A | 0    | 0      | G |
| 11 | BICF2P887817            | 75382516 | 0 | 0    | 0      | A |
| 11 | BICF2P738091            | 75400011 | C | 0.5  | 0.7143 | A |
| 11 | BICF2P16466             | 75405674 | A | 0.5  | 0.7143 | C |
| 11 | BICF2P1315253           | 75422384 | A | 0.5  | 0.2857 | G |
| 11 | BICF2P338310            | 75429264 | A | 0.5  | 0.2857 | G |

|    |                         |          |   |      |        |   |
|----|-------------------------|----------|---|------|--------|---|
| 11 | BICF2G630308819         | 75447435 | G | 0.5  | 0.7143 | A |
| 11 | BICF2G630308829         | 75456735 | A | 0    | 0      | T |
| 11 | BICF2G630308830         | 75456823 | A | 0    | 0      | G |
| 11 | BICF2G630308847         | 75468391 | A | 0    | 0      | C |
| 11 | BICF2G630308863         | 75475208 | G | 0    | 0      | A |
| 11 | BICF2G630308881         | 75486671 | G | 0    | 0      | C |
| 11 | BICF2S23353290          | 75514571 | C | 0.5  | 0.75   | A |
| 11 | BICF2P646781            | 75527922 | A | 0.5  | 0.2857 | G |
| 11 | TIGRP2P154224_rs8819696 | 75534476 | A | 0    | 0      | G |
| 11 | TIGRP2P154227_rs8775243 | 75544030 | 0 | 0    | 0      | G |
| 11 | BICF2G630308933         | 75555631 | G | 0.5  | 0.2857 | A |
| 11 | BICF2G630308964         | 75566801 | A | 0    | 0      | C |
| 11 | BICF2G630308996         | 75581417 | A | 0.25 | 0.4167 | G |
| 11 | TIGRP2P154233_rs8663077 | 75597467 | G | 0.25 | 0.4286 | A |
| 11 | BICF2G630309052         | 75611015 | A | 0.25 | 0.2857 | G |
| 11 | BICF2G630309085         | 75619361 | A | 0.25 | 0.2857 | G |
| 11 | BICF2P1314357           | 75625067 | G | 0    | 0      | A |
| 11 | BICF2P645580            | 75639715 | A | 0    | 0      | G |
| 11 | BICF2G630309138         | 75647811 | A | 0.5  | 0.7143 | G |
| 11 | BICF2G630309173         | 75663767 | A | 0    | 0      | G |
| 11 | BICF2S23333010          | 75671929 | A | 0.25 | 0.4286 | G |
| 11 | BICF2G630309229         | 75683349 | G | 0    | 0      | A |
| 11 | TIGRP2P154287_rs8927470 | 75694780 | G | 0.25 | 0.2857 | A |
| 11 | TIGRP2P154297_rs8917558 | 75713939 | A | 0.25 | 0.4286 | G |
| 11 | BICF2P757655            | 75714100 | G | 0.25 | 0.4286 | A |
| 11 | BICF2S23228375          | 75717527 | A | 0.75 | 0.7143 | C |
| 11 | BICF2P1189485           | 75728358 | A | 0.5  | 0.7143 | G |
| 11 | TIGRP2P154318_rs8963127 | 75739317 | A | 0    | 0      | G |
| 11 | BICF2G630309367         | 75752480 | G | 0.5  | 0.2857 | A |
| 11 | BICF2G630309440         | 75784443 | G | 0.75 | 0.5714 | A |
| 11 | BICF2G630309455         | 75787023 | A | 0    | 0      | G |
| 11 | BICF2G630309463         | 75803035 | A | 0    | 0      | G |
| 11 | BICF2G630309469         | 75810998 | A | 0    | 0      | C |
| 11 | BICF2P185250            | 75822314 | A | 0    | 0      | G |
| 11 | BICF2G630309518         | 75831392 | G | 0.25 | 0.4286 | A |
| 11 | BICF2P757296            | 75851582 | G | 0.5  | 0.2857 | A |
| 11 | BICF2G630309556         | 75855093 | A | 0.25 | 0.2857 | G |
| 11 | BICF2G630309582         | 75871031 | A | 0.25 | 0.2857 | G |
| 11 | BICF2G630309587         | 75877028 | G | 1    | 1      | A |
| 11 | BICF2G630309613         | 75888772 | A | 0.75 | 0.5714 | G |
| 11 | BICF2G630309670         | 75920799 | A | 1    | 1      | G |
| 11 | BICF2G630309689         | 75930341 | A | 0.25 | 0.2857 | G |
| 11 | BICF2G630309703         | 75937612 | G | 1    | 1      | A |
| 11 | BICF2G630309732         | 75950361 | G | 0.75 | 0.5714 | A |
| 11 | BICF2G630309752         | 75957817 | C | 0    | 0      | G |
| 11 | BICF2P254158            | 75977221 | A | 0.25 | 0.2857 | G |
| 11 | BICF2G630309801         | 75982320 | A | 0.25 | 0.4286 | G |

|    |                         |          |   |      |        |   |
|----|-------------------------|----------|---|------|--------|---|
| 11 | BICF2G630309822         | 75992204 | A | 0.5  | 0.2857 | C |
| 11 | BICF2S23721293          | 76006663 | 0 | 0    | 0      | G |
| 11 | BICF2G630309873         | 76020894 | A | 0    | 0      | G |
| 11 | BICF2G630309874         | 76027564 | A | 0    | 0      | G |
| 11 | TIGRP2P154447_rs9139933 | 76038759 | A | 0    | 0      | G |
| 11 | BICF2P274611            | 76044336 | C | 0    | 0      | A |
| 11 | TIGRP2P154455_rs8546275 | 76050141 | A | 0    | 0      | G |
| 11 | BICF2P1018502           | 76065337 | A | 0.5  | 0.3333 | G |
| 11 | BICF2G630309896         | 76082107 | G | 0    | 0      | A |
| 11 | BICF2P1432698           | 76085159 | G | 0    | 0      | A |
| 11 | BICF2G630309920         | 76095573 | A | 0    | 0      | C |
| 11 | BICF2G630309987         | 76108096 | G | 0.25 | 0.4286 | A |
| 11 | BICF2G630310056         | 76129471 | A | 0.25 | 0.4286 | T |
| 11 | BICF2G630310071         | 76130174 | A | 0.75 | 0.5714 | G |
| 11 | BICF2S23055455          | 76142515 | A | 1    | 1      | G |
| 11 | BICF2P780247            | 76161686 | 0 | 0    | 0      | G |
| 11 | BICF2G630310208         | 76162635 | 0 | 0    | 0      | A |
| 11 | BICF2G630310222         | 76169962 | G | 0.5  | 0.2857 | A |
| 11 | BICF2G630310252         | 76179813 | A | 0    | 0      | G |
| 11 | BICF2G630310293         | 76187575 | G | 0    | 0      | A |
| 11 | BICF2G630310393         | 76209592 | A | 0    | 0      | G |
| 11 | BICF2G630310414         | 76213997 | A | 0    | 0      | G |
| 11 | BICF2G630310439         | 76224410 | C | 0.75 | 0.7143 | A |
| 11 | BICF2G630310471         | 76242516 | 0 | 0    | 0      | G |
| 11 | BICF2G630310484         | 76248914 | C | 0.25 | 0.2857 | G |
| 11 | TIGRP2P154546_rs8821425 | 76258148 | T | 0    | 0      | A |
| 11 | BICF2G630310525         | 76258880 | G | 0    | 0      | A |
| 11 | TIGRP2P154567_rs8941149 | 76273234 | A | 0    | 0      | G |
| 11 | BICF2G630310566         | 76280840 | A | 0    | 0      | G |
| 11 | BICF2G630310584         | 76300709 | G | 0.75 | 0.7143 | A |
| 11 | BICF2G630310585         | 76300751 | A | 0.75 | 0.7143 | G |
| 11 | BICF2G630310586         | 76300936 | A | 0    | 0      | G |
| 11 | BICF2G630310588         | 76301887 | A | 0    | 0      | G |
| 11 | BICF2P1011646           | 76306333 | G | 1    | 1      | A |
| 11 | BICF2G630310626         | 76319251 | G | 0.75 | 0.7143 | A |
| 11 | BICF2S2328662           | 76326556 | A | 0    | 0      | G |
| 11 | TIGRP2P154626_rs8733714 | 76338801 | C | 0    | 0.2857 | A |
| 11 | BICF2G630310705         | 76350670 | A | 0.75 | 0.7143 | G |
| 11 | TIGRP2P154649_rs8524795 | 76360134 | A | 0    | 0      | G |
| 11 | BICF2G630310741         | 76376968 | A | 0.75 | 0.7143 | G |
| 11 | BICF2S23718925          | 76389653 | A | 0.75 | 0.7143 | G |
| 11 | TIGRP2P154662_rs8638003 | 76397822 | C | 0.25 | 0.2857 | A |
| 11 | TIGRP2P154678_rs9073538 | 76409979 | A | 0    | 0      | G |
| 11 | TIGRP2P154704_rs9225621 | 76422928 | G | 0    | 0      | A |
| 11 | BICF2P417451            | 76435438 | G | 0    | 0      | A |
| 11 | BICF2P1470535           | 76443504 | G | 0.75 | 0.7143 | A |
| 11 | BICF2P1270897           | 76455987 | A | 0.25 | 0.2857 | G |

|    |                         |          |   |      |        |   |
|----|-------------------------|----------|---|------|--------|---|
| 11 | BICF2S23761729          | 76459948 | G | 1    | 1      | A |
| 11 | BICF2P1214230           | 76474445 | A | 0    | 0      | G |
| 11 | BICF2P774595            | 76480189 | G | 0.25 | 0.2857 | A |
| 11 | BICF2G630310803         | 76489247 | A | 0.25 | 0.2857 | G |
| 11 | TIGRP2P154786_rs9187761 | 76498881 | G | 0    | 0      | A |
| 11 | BICF2G630310823         | 76518062 | A | 0    | 0      | G |
| 11 | BICF2G630310831         | 76521159 | C | 0    | 0      | A |
| 11 | BICF2G630310854         | 76541325 | A | 0.25 | 0.2857 | G |
| 11 | BICF2G630310861         | 76544944 | A | 0.25 | 0.2857 | C |
| 11 | BICF2P1315316           | 76562032 | A | 0    | 0      | G |
| 11 | BICF2P899350            | 76576467 | G | 0.5  | 0.7143 | A |
| 11 | BICF2G630310900         | 76587107 | A | 0.25 | 0.2857 | G |
| 11 | BICF2P199408            | 76592482 | A | 0.25 | 0.4286 | G |
| 11 | BICF2P1318396           | 76603094 | A | 0.25 | 0.4286 | G |
| 11 | BICF2G630310930         | 76616906 | G | 0.75 | 0.5714 | A |
| 11 | BICF2G630310945         | 76627806 | A | 0.25 | 0.2857 | G |
| 11 | BICF2G630310971         | 76637023 | A | 0    | 0      | G |
| 11 | BICF2G630311005         | 76653648 | G | 0    | 0      | A |
| 11 | BICF2G630311021         | 76666267 | A | 0.25 | 0.2857 | G |
| 11 | TIGRP2P154892_rs9194091 | 76671895 | 0 | 0    | 0      | A |
| 11 | TIGRP2P154913_rs8883545 | 76692190 | A | 0.25 | 0.2857 | C |
| 11 | BICF2P675488            | 76694087 | A | 0    | 0      | G |
| 11 | BICF2G630311035         | 76713221 | A | 0.25 | 0.2857 | G |
| 11 | TIGRP2P154939_rs8660596 | 76717884 | A | 0    | 0      | G |
| 11 | BICF2G630311038         | 76717979 | G | 0    | 0      | A |
| 11 | BICF2P714755            | 76724621 | G | 0.5  | 0.2857 | A |
| 11 | BICF2P714744            | 76728163 | C | 0    | 0      | A |
| 11 | BICF2G630311065         | 76744489 | G | 0.25 | 0.2857 | A |
| 11 | BICF2S23114812          | 76751555 | A | 0    | 0      | G |
| 11 | BICF2G630311107         | 76769655 | C | 1    | 1      | A |
| 11 | BICF2G630311116         | 76775187 | G | 1    | 1      | A |
| 11 | TIGRP2P154961_rs8822389 | 76794048 | 0 | 0    | 0      | A |
| 11 | BICF2P371634            | 76798855 | G | 1    | 1      | A |
| 11 | BICF2P798870            | 76809416 | A | 0.5  | 0.2857 | G |
| 11 | BICF2G630311139         | 76828564 | A | 1    | 1      | G |
| 11 | BICF2G630311155         | 76839440 | A | 1    | 1      | G |
| 11 | BICF2G630311170         | 76845620 | A | 1    | 1      | G |
| 11 | BICF2G630311181         | 76856173 | G | 1    | 1      | A |
| 11 | BICF2G630311204         | 76868380 | G | 1    | 1      | A |
| 11 | BICF2G630311225         | 76880316 | A | 0    | 0      | G |
| 11 | BICF2S23439162          | 76889134 | A | 0.25 | 0.4286 | G |
| 11 | BICF2P467357            | 76908698 | A | 0    | 0      | G |
| 11 | BICF2G630311228         | 76921018 | A | 0    | 0      | G |
| 11 | BICF2P752268            | 76930031 | A | 0.25 | 0.4286 | G |
| 11 | BICF2G630311235         | 76942663 | G | 0.5  | 0.2857 | A |
| 11 | BICF2G630311268         | 76951141 | G | 0.25 | 0.2143 | C |
| 11 | BICF2P1244981           | 76961417 | A | 0    | 0      | G |

|    |                         |          |   |      |        |   |
|----|-------------------------|----------|---|------|--------|---|
| 11 | TIGRP2P155024_rs8910015 | 76969876 | A | 0    | 0      | G |
| 11 | TIGRP2P155032_rs8765199 | 76981274 | C | 0.75 | 0.7857 | A |
| 11 | BICF2G630311324         | 76992656 | G | 0.25 | 0.2857 | A |
| 11 | BICF2G630311353         | 77007055 | G | 0.75 | 0.5714 | A |
| 11 | BICF2G630311376         | 77018883 | G | 1    | 0.7857 | A |
| 11 | BICF2G630311398         | 77027155 | G | 0    | 0      | A |
| 11 | BICF2G630311427         | 77040102 | G | 0.25 | 0.4286 | A |
| 11 | BICF2G630311429         | 77042104 | G | 0.75 | 0.7143 | A |
| 11 | BICF2S23737751          | 77048593 | C | 0    | 0      | A |
| 11 | BICF2G630311454         | 77050804 | G | 0.75 | 0.7143 | A |
| 11 | BICF2G630311490         | 77061694 | C | 0.5  | 0.2857 | G |
| 11 | BICF2G630311517         | 77077960 | G | 1    | 1      | A |
| 11 | BICF2S22911225          | 77086060 | G | 0    | 0      | A |
| 11 | BICF2G630311560         | 77105046 | C | 0    | 0      | A |
| 11 | BICF2G630311561         | 77113843 | A | 1    | 1      | G |
| 11 | BICF2G630311564         | 77134956 | A | 0    | 0      | G |
| 11 | BICF2G630311573         | 77154998 | G | 1    | 1      | A |
| 11 | BICF2S23432948          | 77193861 | G | 0    | 0      | A |
| 11 | BICF2G630311588         | 77205524 | A | 1    | 1      | G |
| 11 | BICF2G630311601         | 77211236 | A | NA   | 0      | C |
| 11 | BICF2G630311657         | 77233569 | G | 0    | 0      | A |
| 11 | BICF2G630311662         | 77234659 | A | 0.5  | 0.5    | G |
| 11 | BICF2S23521294          | 77249637 | A | 0    | 0      | G |
| 11 | BICF2G630311715         | 77260005 | A | 0    | 0      | G |
| 11 | BICF2P282343            | 77269758 | G | 0.5  | 0.5    | A |
| 11 | BICF2G630311729         | 77279554 | A | 0.5  | 0.5    | G |
| 11 | BICF2G630311735         | 77280708 | A | 0    | 0      | C |
| 11 | BICF2G630311757         | 77295798 | A | 0.5  | 0.5    | G |
| 11 | BICF2P3948              | 77305354 | A | 0.5  | 0.5    | G |
| 11 | BICF2P670280            | 77315053 | A | 0.5  | 0.5    | G |
| 11 | BICF2P1201469           | 77331701 | G | 0    | 0      | A |
| 11 | BICF2P1031307           | 77344714 | C | 0.5  | 0.5    | A |
| 11 | BICF2P159098            | 77356418 | 0 | 0    | 0      | A |
| 11 | BICF2P398385            | 77371693 | G | 0.5  | 0.5    | A |
| 11 | BICF2P83514             | 77381645 | T | 0.5  | 0.5    | A |
| 11 | BICF2S23338871          | 77394920 | A | 0.5  | 0.5    | G |
| 11 | BICF2S23322669          | 77398130 | A | 0.5  | 0.5    | G |
| 11 | BICF2P1039227           | 77408959 | A | 0    | 0      | G |
| 11 | BICF2P1089090           | 77415697 | G | 0.5  | 0.5    | A |
| 13 | BICF2G630602134         | 3036181  | A | 0    | 0.2857 | G |
| 13 | BICF2G630602144         | 3059745  | C | 0    | 0.2857 | A |
| 13 | BICF2P1398043           | 3070571  | 0 | NA   | 0      | A |
| 13 | BICF2G630602161         | 3091358  | C | 0    | 0.2857 | A |
| 13 | BICF2G630602166         | 3096116  | G | 0    | 0.2857 | A |
| 13 | BICF2P905576            | 3108639  | A | 0    | 0.2857 | G |
| 13 | BICF2P283616            | 3127761  | A | 0.25 | 0.2857 | C |
| 13 | BICF2G630602185         | 3128888  | A | 0    | 0.2857 | G |

|    |                         |         |   |      |        |   |
|----|-------------------------|---------|---|------|--------|---|
| 13 | BICF2G630602202         | 3140444 | A | 0    | 0.2857 | G |
| 13 | BICF2G630602211         | 3157151 | A | 0    | 0.2857 | G |
| 13 | BICF2G630602213         | 3166236 | A | 0    | 0.2857 | G |
| 13 | BICF2G630602219         | 3174563 | A | 0    | 0      | G |
| 13 | BICF2G630602228         | 3186137 | A | 0    | 0.2857 | G |
| 13 | BICF2G630602240         | 3207298 | A | 0    | 0.2857 | G |
| 13 | TIGRP2P174027_rs8910829 | 3216282 | 0 | 0    | 0      | G |
| 13 | BICF2S23118753          | 3220153 | G | 0    | 0.2857 | A |
| 13 | BICF2P1405373           | 3241781 | 0 | 0    | 0      | G |
| 13 | BICF2G630602264         | 3243042 | C | 0    | 0.2857 | A |
| 13 | BICF2G630602279         | 3256712 | A | 0    | 0.2857 | G |
| 13 | BICF2P610078            | 3266021 | A | 0.25 | 0.2857 | C |
| 13 | BICF2G630602316         | 3278970 | A | 0    | 0.25   | C |
| 13 | BICF2G630602317         | 3290838 | A | 0.25 | 0.2857 | G |
| 13 | BICF2P788594            | 3302919 | C | 0.25 | 0.2857 | A |
| 13 | BICF2G630602323         | 3327456 | G | 0.25 | 0.2857 | A |
| 13 | BICF2G630602327         | 3336134 | G | 0.25 | 0.2857 | A |
| 13 | BICF2G630602334         | 3352265 | A | 0    | 0.2857 | G |
| 13 | BICF2G630602340         | 3364535 | A | 0.25 | 0.2857 | G |
| 13 | BICF2G630602345         | 3379702 | C | 0.25 | 0.2857 | A |
| 13 | BICF2G630602347         | 3382975 | A | 0.25 | 0.2857 | G |
| 13 | BICF2G630602358         | 3403281 | G | 0    | 0      | A |
| 13 | BICF2G630602361         | 3407199 | G | 0    | 0      | A |
| 13 | BICF2G630602382         | 3424543 | G | 0    | 0      | A |
| 13 | BICF2G630602385         | 3429392 | G | 0    | 0      | A |
| 13 | BICF2G630602390         | 3459897 | A | 0    | 0      | G |
| 13 | BICF2P435750            | 3462140 | C | 0    | 0.2857 | G |
| 13 | BICF2G630602398         | 3476377 | A | 0    | 0      | T |
| 13 | BICF2G630602408         | 3494613 | A | 0    | 0      | C |
| 13 | BICF2G630602412         | 3496797 | G | 0    | 0      | A |
| 13 | BICF2G630602420         | 3508769 | G | 0    | 0      | A |
| 13 | BICF2G630602425         | 3528610 | A | 0    | 0      | G |
| 13 | BICF2P125003            | 3536218 | A | 0    | 0      | G |
| 13 | BICF2G630602435         | 3547351 | G | 0    | 0      | A |
| 13 | BICF2G630602441         | 3560062 | G | 0    | 0      | A |
| 13 | BICF2G630602449         | 3572749 | G | 0    | 0      | A |
| 13 | BICF2G630602450         | 3578743 | A | 0    | 0      | G |
| 13 | BICF2G630602458         | 3600562 | A | 0    | 0      | G |
| 13 | BICF2G630602462         | 3611148 | A | 0    | 0      | T |
| 13 | BICF2G630602471         | 3627320 | A | 0    | 0      | C |
| 13 | BICF2P1325541           | 3636946 | A | 0    | 0      | G |
| 13 | BICF2G630602486         | 3650134 | G | 0    | 0      | C |
| 13 | BICF2G630602491         | 3657083 | A | 0    | 0.2857 | G |
| 13 | BICF2G630602503         | 3670615 | 0 | 0    | 0      | C |
| 13 | BICF2G630602511         | 3681562 | A | 0    | 0      | G |
| 13 | BICF2G630602515         | 3691928 | G | 0    | 0      | A |
| 13 | BICF2G630602523         | 3712451 | C | 0    | 0      | A |



|    |                         |         |   |      |        |   |
|----|-------------------------|---------|---|------|--------|---|
| 13 | BICF2G630602525         | 3714783 | C | 0    | 0      | A |
| 13 | BICF2S23755243          | 3726649 | A | 0    | 0      | C |
| 13 | BICF2G630602532         | 3737858 | A | 0    | 0      | C |
| 13 | BICF2G630602547         | 3756458 | A | 0    | 0      | G |
| 13 | BICF2G630602554         | 3760837 | G | 0    | 0      | A |
| 13 | BICF2G630602563         | 3778724 | G | 0    | 0      | A |
| 13 | BICF2G630602566         | 3786814 | A | 0    | 0      | G |
| 13 | BICF2P1493587           | 3797137 | G | 0    | 0      | A |
| 13 | BICF2G630602580         | 3810612 | T | 0    | 0      | A |
| 13 | BICF2G630602584         | 3824116 | A | 0    | 0      | G |
| 13 | BICF2G630602592         | 3833120 | A | 0    | 0      | G |
| 13 | BICF2P622589            | 3848371 | G | 0    | 0      | A |
| 13 | BICF2G630602605         | 3857350 | G | 0    | 0      | A |
| 13 | BICF2G630602606         | 3866503 | A | 0    | 0      | G |
| 13 | BICF2P150235            | 3886169 | G | 0    | 0      | A |
| 13 | BICF2G630602616         | 3895672 | A | 0    | 0      | G |
| 13 | BICF2G630602622         | 3903669 | A | 0    | 0      | G |
| 13 | BICF2G630602624         | 3910336 | A | 0    | 0      | C |
| 13 | BICF2P1044527           | 3928789 | A | 0    | 0      | G |
| 13 | BICF2G630602636         | 3938457 | A | 0    | 0      | G |
| 13 | BICF2G630602641         | 3945246 | A | 0    | 0      | G |
| 13 | BICF2G630602646         | 3964960 | A | 0    | 0      | G |
| 13 | BICF2G630602649         | 3977297 | A | 0    | 0      | G |
| 13 | BICF2G630602652         | 3988820 | G | 0    | 0      | A |
| 13 | BICF2G630602653         | 3990959 | C | 0    | 0      | A |
| 13 | BICF2G630602673         | 4011324 | A | 0    | 0.2857 | G |
| 13 | BICF2G630602679         | 4022456 | G | 0    | 0.2857 | A |
| 13 | BICF2G630602681         | 4025406 | G | 0    | 0      | A |
| 13 | BICF2G630602693         | 4042410 | A | 0    | 0      | G |
| 13 | BICF2G630602706         | 4054152 | A | 0.25 | 0.5714 | C |
| 13 | BICF2G630602713         | 4062631 | G | 0    | 0      | A |
| 13 | BICF2G630602747         | 4098861 | A | 0    | 0      | C |
| 13 | BICF2G630602752         | 4114923 | G | 0    | 0      | A |
| 13 | BICF2G630602762         | 4128055 | G | 0    | 0      | A |
| 13 | BICF2G630602771         | 4133574 | C | 0    | 0      | A |
| 13 | BICF2G630602784         | 4142723 | A | 0.25 | 0.5714 | G |
| 13 | TIGRP2P174082_rs9025829 | 4156306 | 0 | 0    | 0      | C |
| 13 | BICF2G630602798         | 4176521 | G | 0    | 0      | A |
| 13 | BICF2G630602815         | 4205861 | A | 0.25 | 0.5714 | C |
| 13 | BICF2P852106            | 4218309 | A | 0    | 0      | C |
| 13 | BICF2P557599            | 4265009 | 0 | 0    | 0      | C |
| 13 | BICF2P933613            | 4272003 | G | 0.25 | 0.5714 | A |
| 13 | BICF2G630602836         | 4286785 | A | 0.25 | 0.5714 | G |
| 13 | BICF2G630602837         | 4291351 | A | 0.25 | 0.5714 | C |
| 13 | BICF2P6104              | 4304867 | 0 | 0    | 0      | A |
| 13 | BICF2P922869            | 4317608 | A | 0    | 0      | G |
| 13 | BICF2G630602845         | 4333227 | G | 0    | 0      | A |

|    |                         |         |   |      |        |   |
|----|-------------------------|---------|---|------|--------|---|
| 13 | BICF2S23254242          | 4336760 | C | 0.75 | 0.4286 | A |
| 13 | BICF2G630602851         | 4350125 | A | 0    | 0      | G |
| 13 | BICF2G630602853         | 4359308 | G | 0    | 0      | A |
| 13 | BICF2G630602856         | 4371999 | C | 0    | 0      | G |
| 13 | BICF2P246233            | 4385618 | 0 | 0    | 0      | G |
| 13 | BICF2P444644            | 4405146 | G | 0    | 0      | A |
| 13 | BICF2G630602865         | 4416306 | G | 0    | 0      | A |
| 13 | BICF2P1358635           | 4427788 | 0 | 0    | 0      | A |
| 13 | BICF2G630602874         | 4451696 | A | 0    | 0      | C |
| 13 | BICF2G630602876         | 4466720 | A | 0    | 0      | C |
| 13 | BICF2P957335            | 4477964 | C | 0.25 | 0.5714 | A |
| 13 | BICF2P403346            | 4485990 | 0 | 0    | 0      | A |
| 13 | TIGRP2P174093_rs8705065 | 4511639 | 0 | 0    | 0      | A |
| 13 | BICF2G630602893         | 4523040 | G | 0    | 0      | A |
| 13 | BICF2P350778            | 4539623 | 0 | 0    | 0      | G |
| 13 | BICF2G630602899         | 4548379 | T | 0    | 0      | A |
| 13 | BICF2G630602905         | 4560582 | C | 0    | 0      | A |
| 13 | BICF2P841532            | 4570420 | A | 0.25 | 0.5714 | C |
| 13 | BICF2G630602913         | 4584574 | G | 0.25 | 0.5714 | A |
| 13 | BICF2P1326570           | 4601826 | A | 0.25 | 0.5714 | T |
| 13 | BICF2G630602922         | 4616501 | A | 0.25 | 0.5714 | T |
| 13 | BICF2G630602925         | 4623932 | G | 0.25 | 0.5714 | A |
| 13 | BICF2G630602926         | 4637282 | G | 0.75 | 0.4286 | A |
| 13 | BICF2G630602931         | 4654445 | A | 0.25 | 0.5714 | G |
| 13 | BICF2G630602935         | 4668935 | A | 0    | 0      | G |
| 13 | BICF2P756435            | 4673412 | 0 | 0    | 0      | G |
| 13 | BICF2S23411122          | 4681168 | A | 0.25 | 0.5714 | G |
| 13 | BICF2S23733704          | 4697198 | G | 0.75 | 0.4286 | C |
| 13 | BICF2P474181            | 4712609 | 0 | 0    | 0      | G |
| 13 | BICF2G630602944         | 4722932 | A | 0.25 | 0.5714 | G |
| 13 | BICF2G630602946         | 4730009 | A | 0    | 0      | G |
| 13 | BICF2G630602950         | 4740978 | G | 0.25 | 0.5714 | A |
| 13 | BICF2G630602952         | 4752645 | 0 | 0    | 0      | C |
| 13 | BICF2G630602954         | 4769538 | 0 | 0    | 0      | A |
| 13 | BICF2G630602962         | 4785534 | A | 0    | 0      | G |
| 13 | BICF2G630602965         | 4797957 | A | 0    | 0      | C |
| 13 | BICF2G630602969         | 4807000 | G | 0.25 | 0.5714 | A |
| 13 | BICF2G630602973         | 4823169 | A | 0    | 0      | G |
| 13 | BICF2G630602978         | 4831336 | C | 0.25 | 0.5714 | A |
| 13 | BICF2G630602992         | 4844876 | A | 0    | 0      | G |
| 13 | BICF2G630603007         | 4871620 | G | 0    | 0      | A |
| 13 | BICF2G630603022         | 4912351 | C | 0    | 0      | A |
| 13 | BICF2G630603030         | 4926649 | A | 0    | 0      | G |
| 13 | BICF2G630603039         | 4940922 | G | 0    | 0      | A |
| 13 | BICF2G630603044         | 4953303 | C | 0    | 0      | A |
| 13 | BICF2G630603047         | 4956858 | A | 0    | 0      | G |
| 13 | BICF2G630603051         | 4971031 | A | 0    | 0      | G |

|    |                         |         |   |      |        |   |
|----|-------------------------|---------|---|------|--------|---|
| 13 | BICF2G630603058         | 4989652 | T | 0    | 0      | A |
| 13 | BICF2P1359888           | 4991492 | 0 | 0    | 0      | A |
| 13 | BICF2G630603065         | 5004947 | A | 0    | 0      | G |
| 13 | BICF2G630603074         | 5014634 | G | 0.25 | 0.5714 | A |
| 13 | BICF2G630603095         | 5032439 | A | 0    | 0      | G |
| 13 | BICF2G630603101         | 5038848 | 0 | 0    | 0      | G |
| 13 | BICF2G630603118         | 5052198 | T | 0    | 0      | A |
| 13 | BICF2G630603122         | 5061915 | A | 0    | 0      | G |
| 13 | BICF2G630603141         | 5079942 | C | 0    | 0      | A |
| 13 | BICF2P542422            | 5084814 | G | 1    | 0.4286 | A |
| 13 | BICF2G630603152         | 5102985 | A | 0.75 | 0.4286 | G |
| 13 | BICF2P1300931           | 5119338 | A | 0.75 | 0.4286 | G |
| 13 | BICF2P712462            | 5132602 | 0 | 0    | 0      | A |
| 13 | BICF2G630603160         | 5151804 | G | 0.25 | 0.5714 | A |
| 13 | BICF2G630603161         | 5152585 | A | 0.25 | 0.5714 | G |
| 13 | BICF2P795808            | 5164030 | 0 | 0    | 0      | C |
| 13 | TIGRP2P180738_rs8846789 | 5177216 | 0 | 0    | 0      | G |
| 13 | TIGRP2P180742_rs8891552 | 5192482 | 0 | 0    | 0      | A |
| 13 | BICF2P983357            | 5201827 | A | 0    | 0      | G |
| 13 | BICF2P3284              | 5220185 | 0 | 0    | 0      | G |
| 13 | BICF2G630603189         | 5228516 | A | 0.75 | 0.4286 | G |
| 13 | BICF2G630603194         | 5261274 | A | 0    | 0      | G |
| 13 | BICF2P1174867           | 5264386 | A | 0.25 | 0.2857 | G |
| 13 | BICF2G630603198         | 5270622 | G | 0.75 | 0.4286 | A |
| 13 | BICF2G630603203         | 5290386 | A | 0    | 0      | G |
| 13 | BICF2G630603205         | 5303959 | A | 0    | 0      | G |
| 13 | BICF2P365003            | 5323044 | G | 0    | 0      | A |
| 13 | BICF2S23753227          | 5332931 | C | 1    | 0.4    | A |
| 13 | BICF2G630603211         | 5338690 | A | 0    | 0      | C |
| 13 | BICF2G630603216         | 5348491 | A | 0    | 0      | G |
| 13 | TIGRP2P180753_rs8927746 | 5373486 | 0 | 0    | 0      | A |
| 13 | BICF2G630603222         | 5389511 | A | 0    | 0      | G |
| 13 | BICF2P1083826           | 5394956 | 0 | 0    | 0      | A |
| 13 | BICF2P1270204           | 5412504 | 0 | 0    | 0      | G |
| 13 | BICF2P486678            | 5422919 | G | 0.75 | 0.4286 | A |
| 13 | BICF2P1070641           | 5434105 | 0 | 0    | 0      | C |
| 13 | BICF2S23231402          | 5444520 | A | 0.75 | 0.4167 | G |
| 13 | BICF2G630603235         | 5452619 | T | 0.25 | 0.5714 | A |
| 13 | BICF2P359548            | 5470260 | 0 | 0    | 0      | C |
| 13 | BICF2G630603240         | 5478165 | G | NA   | NA     | A |
| 13 | BICF2S23611117          | 5492055 | 0 | 0    | 0      | A |
| 13 | BICF2P632664            | 5512124 | G | 0.25 | 0.2143 | A |
| 13 | BICF2G630603262         | 5526971 | G | 0.5  | 0.2143 | A |
| 13 | BICF2P286166            | 5543491 | A | 0.5  | 0.2143 | C |
| 13 | BICF2G630603275         | 5555513 | G | 0.5  | 0.2143 | A |
| 13 | BICF2G630603302         | 5575779 | A | 0.5  | 0.2143 | G |
| 13 | TIGRP2P180792_rs8857877 | 5576204 | A | 0.25 | 0.2857 | G |

|    |                         |         |   |      |        |   |
|----|-------------------------|---------|---|------|--------|---|
| 13 | BICF2G630603303         | 5576301 | A | 0    | 0      | G |
| 13 | BICF2G630603307         | 5577552 | G | 0.5  | 0.2143 | A |
| 13 | BICF2G630603321         | 5591954 | C | 0.5  | 0.2    | A |
| 13 | BICF2G630603322         | 5602578 | A | 0.5  | 0.2143 | G |
| 13 | BICF2G630603325         | 5615915 | A | 0.5  | 0.2143 | G |
| 13 | BICF2G630603329         | 5627970 | G | 0.5  | 0.2143 | A |
| 13 | BICF2G630603335         | 5645379 | A | 0.5  | 0.2143 | G |
| 13 | TIGRP2P180799_rs9124029 | 5660097 | 0 | 0    | 0      | G |
| 13 | BICF2P936693            | 5671030 | 0 | 0    | 0      | A |
| 13 | BICF2G630603346         | 5684200 | C | 0    | 0      | G |
| 13 | BICF2P1270319           | 5693305 | 0 | 0    | 0      | A |
| 13 | BICF2P1053953           | 5707116 | A | 0    | 0      | G |
| 13 | BICF2G630603359         | 5716715 | G | 0    | 0      | A |
| 13 | BICF2P875194            | 5721979 | 0 | 0    | 0      | A |
| 13 | BICF2P1089381           | 5734118 | 0 | 0    | 0      | G |
| 13 | BICF2G630603376         | 5744993 | A | 0    | 0      | G |
| 13 | BICF2P1076453           | 5767757 | 0 | 0    | 0      | G |
| 13 | BICF2G630603389         | 5788503 | C | 0    | 0      | G |
| 13 | BICF2G630603398         | 5797455 | A | 0    | 0      | C |
| 13 | BICF2P1233246           | 5810712 | G | 0    | 0      | A |
| 13 | BICF2G630603417         | 5821919 | G | 0    | 0      | C |
| 13 | BICF2G630603422         | 5832846 | A | 0    | 0      | G |
| 13 | BICF2G630603433         | 5846823 | G | 0    | 0      | A |
| 13 | BICF2G630603450         | 5860625 | G | 0    | 0      | A |
| 13 | BICF2G630603460         | 5863333 | A | 0    | 0      | T |
| 13 | BICF2G630603463         | 5865630 | A | NA   | 0      | T |
| 13 | BICF2P1169505           | 5878269 | G | 0    | 0      | A |
| 13 | BICF2P399302            | 5896895 | G | 0.25 | 0.2143 | C |
| 13 | BICF2P595104            | 5903746 | 0 | 0    | 0      | G |
| 13 | TIGRP2P180901_rs8994138 | 5911608 | A | 0    | 0      | G |
| 13 | BICF2G630603464         | 5935764 | G | 0    | 0      | A |
| 13 | BICF2G630603466         | 5950742 | 0 | 0    | 0      | G |
| 13 | BICF2P1009944           | 5957807 | C | 0    | 0      | A |
| 13 | BICF2P358091            | 5977309 | 0 | 0    | 0      | G |
| 13 | BICF2S23616262          | 5980254 | G | 0    | 0      | C |
| 13 | BICF2G630603469         | 5996086 | G | 0    | 0      | A |
| 13 | BICF2P1213669           | 6007042 | G | 0.5  | 0.2143 | A |
| 13 | TIGRP2P180908_rs8730508 | 6020996 | G | 0.5  | 0.2143 | A |
| 13 | BICF2P825645            | 6030059 | A | 0.5  | 0.2143 | G |
| 13 | BICF2P359215            | 6038790 | G | 0.5  | 0.2143 | A |
| 13 | BICF2P233875            | 6050149 | 0 | 0    | 0      | C |
| 13 | BICF2G630603470         | 6068158 | T | 0.25 | 0.2857 | A |
| 13 | BICF2G630603472         | 6075807 | A | 0    | 0      | G |
| 13 | BICF2P1144319           | 6094486 | G | 0.5  | 0.2143 | C |
| 13 | BICF2P580776            | 6102029 | A | 0.5  | 0.2143 | G |
| 13 | BICF2P564654            | 6108101 | G | 0.5  | 0.2143 | C |
| 13 | BICF2P653113            | 6118131 | G | 0.5  | 0.2143 | A |

|    |                         |         |   |      |        |   |
|----|-------------------------|---------|---|------|--------|---|
| 13 | BICF2P904228            | 6133020 | A | 0.5  | 0.2143 | G |
| 13 | BICF2P40776             | 6167215 | G | 0.5  | 0.2143 | A |
| 13 | BICF2P1270755           | 6179541 | C | 0.5  | 0.2143 | A |
| 13 | BICF2P41815             | 6188023 | A | 0.5  | 0.5    | C |
| 13 | BICF2P850402            | 6200154 | G | 0.5  | 0.2143 | A |
| 13 | TIGRP2P180938_rs8741896 | 6218232 | A | 0.5  | 0.2143 | G |
| 13 | BICF2P1102608           | 6228373 | A | 0.5  | 0.2143 | G |
| 13 | TIGRP2P180948_rs9242607 | 6237740 | A | 0.5  | 0.2143 | G |
| 13 | BICF2P1072189           | 6244563 | G | 0.5  | 0.2143 | A |
| 13 | BICF2P497394            | 6260595 | A | 0.5  | 0.2143 | G |
| 13 | BICF2P451548            | 6278522 | 0 | 0    | 0      | A |
| 13 | BICF2P977971            | 6288737 | G | 0.5  | 0.2143 | C |
| 13 | BICF2S2392193           | 6305486 | A | 0.5  | 0.2143 | C |
| 13 | TIGRP2P180970_rs9026100 | 6317768 | G | 0.5  | 0.2143 | A |
| 13 | BICF2P227491            | 6325026 | 0 | 0    | 0      | A |
| 13 | BICF2P690213            | 6337263 | A | 0.5  | 0.2143 | G |
| 13 | BICF2P1182174           | 6348310 | 0 | 0    | 0      | A |
| 13 | BICF2G630603483         | 6365262 | A | 0    | 0.2857 | G |
| 13 | BICF2G630603484         | 6375022 | A | 0    | 0.2857 | G |
| 13 | BICF2P212177            | 6383843 | G | 0.5  | 0.2143 | A |
| 13 | BICF2P137477            | 6410096 | 0 | 0    | 0      | C |
| 13 | BICF2P809484            | 6418765 | A | NA   | 0.2143 | G |
| 13 | BICF2P1270259           | 6432929 | A | 0    | 0.2857 | G |
| 13 | BICF2P324609            | 6449787 | T | 0.5  | 0.2143 | A |
| 13 | BICF2P1346598           | 6456324 | G | 0.5  | 0.2143 | A |
| 13 | TIGRP2P181002_rs9250723 | 6466156 | A | 0.5  | 0.2143 | G |
| 13 | BICF2P353421            | 6477098 | A | 0.5  | 0.2143 | G |
| 13 | BICF2P1445804           | 6487848 | G | 0.5  | 0.2143 | A |
| 13 | BICF2P987559            | 6507623 | G | 0.5  | 0.2143 | A |
| 13 | BICF2P987561            | 6509346 | 0 | 0    | 0      | A |
| 13 | BICF2S2352768           | 6522377 | 0 | 0    | 0      | G |
| 13 | BICF2P30752             | 6532185 | A | 0.5  | 0.2143 | T |
| 13 | BICF2P787659            | 6544213 | A | 0.5  | 0.2143 | G |
| 13 | TIGRP2P181018_rs8724645 | 6558190 | A | 0.5  | 0.2143 | G |
| 13 | BICF2P177179            | 6568025 | G | 0.5  | 0.2143 | A |
| 13 | BICF2G630603492         | 6578418 | C | 0.25 | 0.2143 | A |
| 13 | BICF2P1073234           | 6604546 | G | 0.5  | 0.2143 | A |
| 13 | BICF2P1460590           | 6623992 | A | 0.5  | 0.1667 | C |
| 13 | BICF2G630603493         | 6633953 | A | 0.25 | 0.2143 | G |
| 13 | TIGRP2P181032_rs9232035 | 6655568 | A | 0.5  | 0.2143 | C |
| 13 | TIGRP2P181033_rs8931682 | 6664373 | A | 0.5  | 0.2143 | C |
| 13 | TIGRP2P181034_rs9135796 | 6684479 | G | 0.5  | 0.2143 | A |
| 13 | BICF2G630603497         | 6698034 | A | 0.25 | 0.2143 | T |
| 13 | BICF2P1210979           | 6708802 | 0 | 0    | 0      | A |
| 13 | BICF2G630603503         | 6742985 | A | 0    | 0.25   | G |
| 13 | G774f30S24              | 6767750 | A | NA   | NA     | G |
| 13 | TIGRP2P181042_rs8752974 | 6777361 | A | 0    | 0      | G |

|    |                         |         |   |      |        |   |
|----|-------------------------|---------|---|------|--------|---|
| 13 | BICF2P643476            | 6796109 | G | 0    | 0      | A |
| 13 | BICF2P643473            | 6797044 | G | 0    | 0      | A |
| 13 | TIGRP2P181056_rs9040793 | 6814813 | A | 0    | 0      | G |
| 13 | TIGRP2P181067_rs8730125 | 6825855 | A | 0    | 0      | G |
| 13 | TIGRP2P181073_rs9064035 | 6836797 | G | 0    | 0      | A |
| 13 | TIGRP2P181083_rs8813898 | 6843178 | A | 0    | 0      | G |
| 13 | TIGRP2P181093_rs9082989 | 6859868 | 0 | 0    | 0      | A |
| 13 | BICF2G630603513         | 6873170 | A | 0    | 0.2857 | T |
| 13 | BICF2P1293961           | 6910792 | A | 0    | 0      | T |
| 13 | BICF2P747561            | 6913672 | 0 | 0    | 0      | A |
| 13 | BICF2P573407            | 6928170 | 0 | 0    | 0      | A |
| 13 | TIGRP2P181107_rs8762427 | 6936371 | 0 | 0    | 0      | A |
| 13 | BICF2P723539            | 6950323 | 0 | 0    | 0      | A |
| 13 | TIGRP2P181109_rs9187529 | 6962949 | 0 | 0    | 0      | G |
| 13 | TIGRP2P181111_rs8703803 | 6969517 | A | 0.5  | 0.2143 | G |
| 13 | BICF2P1148756           | 6985203 | A | 0    | 0      | G |
| 13 | TIGRP2P181116_rs8607445 | 6999661 | A | 0    | 0      | G |
| 13 | BICF2P86662             | 7003570 | 0 | 0    | 0      | A |
| 13 | BICF2S23524989          | 7021972 | 0 | 0    | 0      | G |
| 13 | BICF2G630603518         | 7035021 | C | 0    | 0.2857 | A |
| 13 | BICF2G630603519         | 7039420 | A | 0.25 | 0.2857 | G |
| 13 | BICF2P164787            | 7058508 | 0 | 0    | 0      | A |
| 13 | G775f32S135             | 7061632 | 0 | 0    | 0      | C |
| 13 | BICF2P103050            | 7086495 | A | 0    | 0      | C |
| 13 | BICF2P652420            | 7098829 | A | 0    | 0      | G |
| 13 | TIGRP2P181128_rs8520426 | 7107136 | 0 | 0    | 0      | G |
| 13 | TIGRP2P181136_rs8613781 | 7127019 | 0 | 0    | 0      | G |
| 13 | BICF2P765162            | 7139916 | 0 | 0    | 0      | G |
| 13 | TIGRP2P181139_rs8982906 | 7146188 | A | 0    | 0.2857 | G |
| 13 | BICF2P1438364           | 7156582 | 0 | 0    | 0      | G |
| 13 | BICF2P867078            | 7166088 | A | 0    | 0.2857 | G |
| 13 | BICF2P1224076           | 7182266 | G | 0    | 0.25   | A |
| 13 | BICF2P319605            | 7199010 | G | 0    | 0.2857 | A |
| 13 | BICF2P539973            | 7218790 | G | 0    | 0.2857 | A |
| 13 | BICF2P775727            | 7233003 | A | 0    | 0.2857 | C |
| 13 | BICF2S2378899           | 7237691 | A | 0    | 0.2857 | G |
| 13 | TIGRP2P181167_rs8671465 | 7246599 | A | 0    | 0.2857 | G |
| 13 | BICF2P474464            | 7257604 | 0 | 0    | 0      | A |
| 13 | BICF2P665153            | 7279145 | G | 0    | 0.2857 | A |
| 13 | TIGRP2P181170_rs8670334 | 7290491 | C | 0    | 0.2857 | G |
| 13 | BICF2P782371            | 7306027 | A | 0    | 0.2857 | T |
| 13 | BICF2P245526            | 7323036 | G | 0.25 | 0.5    | A |
| 13 | BICF2P889350            | 7331416 | G | 0.25 | 0.5    | A |
| 13 | BICF2P1263141           | 7344665 | G | 0.25 | 0.5    | A |
| 13 | BICF2S23144512          | 7353018 | A | 0.25 | 0.5    | G |
| 13 | BICF2P990678            | 7363678 | A | 0.25 | 0.5    | G |
| 13 | BICF2P1135671           | 7374283 | C | 0.25 | 0.2143 | A |

|    |                         |         |   |      |        |   |
|----|-------------------------|---------|---|------|--------|---|
| 13 | BICF2G630603527         | 7376238 | C | 0.25 | 0.5    | A |
| 13 | BICF2S23122792          | 7384059 | A | 0.25 | 0.5    | G |
| 13 | TIGRP2P181203_rs8844102 | 7401047 | C | 0    | 0.2857 | G |
| 13 | TIGRP2P181208_rs8609594 | 7410513 | G | 0.25 | 0.5    | A |
| 13 | BICF2P839832            | 7423360 | A | 0.75 | 0.4286 | G |
| 13 | BICF2P212924            | 7432836 | 0 | 0    | 0      | A |
| 13 | TIGRP2P181210_rs9040063 | 7442429 | 0 | 0    | 0      | C |
| 13 | BICF2P1028734           | 7455499 | A | 0    | 0.2857 | G |
| 13 | TIGRP2P181213_rs8647242 | 7469784 | A | 0    | 0.2857 | C |
| 13 | BICF2P906491            | 7485254 | A | 0    | 0.25   | G |
| 13 | BICF2P1237530           | 7486596 | C | 0    | 0.2857 | A |
| 13 | BICF2P529071            | 7498752 | A | 0    | 0.2857 | G |
| 13 | BICF2P871825            | 7513787 | G | 0    | 0.2857 | A |
| 13 | BICF2P536955            | 7527445 | A | 0.5  | 0.5    | T |
| 13 | BICF2G630603538         | 7532622 | A | 0.25 | 0.5714 | G |
| 13 | TIGRP2P181236_rs9196016 | 7562538 | 0 | 0    | 0      | G |
| 13 | BICF2P651696            | 7565502 | A | 0.5  | 0.2143 | G |
| 13 | BICF2G630603541         | 7575251 | A | 0    | 0      | G |
| 13 | BICF2G630603542         | 7580033 | G | 0.25 | 0.2857 | A |
| 13 | BICF2P900970            | 7591804 | 0 | 0    | 0      | A |
| 13 | BICF2P334420            | 7601652 | 0 | 0    | 0      | A |
| 13 | BICF2G630603545         | 7618781 | A | 0.25 | 0.2143 | G |
| 13 | BICF2P727971            | 7626816 | A | 0.5  | 0.6    | G |
| 13 | BICF2P535075            | 7636202 | G | 0.5  | 0.5    | A |
| 13 | BICF2P955005            | 7649483 | G | 0    | 0.2857 | A |
| 13 | TIGRP2P181245_rs8969472 | 7672985 | 0 | 0    | 0      | C |
| 13 | BICF2G630603552         | 7709145 | G | 0.25 | 0.5    | A |
| 13 | BICF2P120057            | 7730253 | 0 | 0    | 0      | A |
| 13 | BICF2S23613832          | 7748971 | G | 0.5  | 0.5    | A |
| 13 | BICF2P298945            | 7754512 | G | 0    | 0      | A |
| 13 | BICF2P202705            | 7763093 | 0 | 0    | 0      | A |
| 13 | BICF2P266270            | 7782960 | 0 | 0    | 0      | C |
| 13 | BICF2S23261183          | 7788337 | A | 0.5  | 0.5    | G |
| 13 | BICF2P126049            | 7807220 | A | 0    | 0      | G |
| 13 | BICF2P823099            | 7815787 | G | 0    | 0      | A |
| 13 | TIGRP2P181257_rs8955981 | 7823506 | G | 0    | 0.2857 | A |
| 13 | BICF2P746996            | 7833097 | G | NA   | 0      | A |
| 13 | BICF2P4310              | 7846208 | 0 | 0    | 0      | G |
| 13 | TIGRP2P181265_rs8685944 | 7860357 | A | 0.75 | 0.5    | G |
| 13 | TIGRP2P181270_rs9134711 | 7868035 | A | 0.75 | 0.5    | G |
| 13 | BICF2G630603557         | 7879989 | 0 | 0    | 0      | C |
| 13 | BICF2S23020894          | 7889527 | G | 0.75 | 0.5    | A |
| 13 | BICF2S23132551          | 7908654 | A | 0    | 0      | G |
| 13 | BICF2P734842            | 7915781 | A | 0.75 | 0.5    | G |
| 13 | TIGRP2P181290_rs9239018 | 7934222 | A | 0.75 | 0.5    | G |
| 13 | TIGRP2P181293_rs9239013 | 7935439 | G | 0.75 | 0.5    | A |
| 13 | BICF2P31344             | 7957327 | G | 1    | 0.5    | A |

|    |                         |         |   |      |        |   |
|----|-------------------------|---------|---|------|--------|---|
| 13 | BICF2G630603558         | 7967301 | A | 0    | 0      | C |
| 13 | TIGRP2P181303_rs8735812 | 7991865 | G | 0.75 | 0.5    | A |
| 13 | TIGRP2P181304_rs8449981 | 7999498 | A | 0.75 | 0.5    | G |
| 13 | BICF2P665811            | 8016403 | G | 0.75 | 0.5    | A |
| 13 | BICF2P847641            | 8035999 | C | 0.75 | 0.5    | G |
| 13 | BICF2P483673            | 8052539 | C | 0.75 | 0.5    | G |
| 13 | BICF2S23012118          | 8061858 | A | 0.75 | 0.5    | G |
| 13 | BICF2P1439231           | 8079481 | A | 0.75 | 0.5    | G |
| 13 | BICF2P1006529           | 8089391 | A | 0.75 | 0.5    | G |
| 13 | BICF2P997955            | 8103334 | G | 0.75 | 0.5    | A |
| 13 | BICF2P80259             | 8110936 | A | 0.75 | 0.5    | G |
| 13 | BICF2P638114            | 8138903 | A | 0.75 | 0.5    | G |
| 13 | BICF2P3449              | 8156093 | 0 | 0    | 0      | G |
| 13 | TIGRP2P181339_rs8933719 | 8167754 | G | 0.75 | 0.5    | C |
| 13 | BICF2P235546            | 8180230 | G | 0.75 | 0.5    | A |
| 13 | BICF2P1028658           | 8197127 | G | 0.75 | 0.5    | A |
| 13 | BICF2P1158183           | 8203378 | 0 | 0    | 0      | A |
| 13 | BICF2P1129143           | 8214295 | 0 | 0    | 0      | C |
| 13 | BICF2S23139507          | 8233847 | A | 0    | 0      | G |
| 13 | TIGRP2P181348_rs8997745 | 8234655 | A | 0.75 | 0.5    | G |
| 13 | BICF2P1135301           | 8264251 | 0 | 0    | 0      | A |
| 13 | BICF2P543364            | 8286652 | 0 | 0    | 0      | A |
| 13 | BICF2S23334507          | 8316233 | 0 | 0    | 0      | A |
| 13 | BICF2P813984            | 8338711 | 0 | 0    | 0      | A |
| 13 | BICF2S23210168          | 8350429 | C | 0.75 | 0.5    | G |
| 13 | BICF2S23719582          | 8361957 | G | 0.75 | 0.5    | A |
| 13 | BICF2S2342531           | 8379797 | G | 0.75 | 0.5    | A |
| 13 | BICF2P188790            | 8384816 | 0 | 0    | 0      | G |
| 13 | BICF2S23256495          | 8414539 | A | 0.75 | 0.5    | G |
| 13 | BICF2S23732530          | 8420838 | A | 0.75 | 0.5    | G |
| 13 | BICF2S241540            | 8431437 | G | 0.75 | 0.5    | A |
| 13 | BICF2P384765            | 8445044 | G | 0.25 | 0.5    | A |
| 13 | TIGRP2P181364_rs8883537 | 8458731 | G | 0.75 | 0.5    | A |
| 13 | BICF2P231397            | 8466836 | G | 0.75 | 0.5    | A |
| 13 | BICF2P852903            | 8486489 | A | 0.75 | 0.5    | G |
| 13 | TIGRP2P181373_rs8868942 | 8487331 | A | 0.75 | 0.5    | C |
| 13 | BICF2P1407441           | 8500213 | G | 0    | 0      | A |
| 13 | BICF2P497897            | 8516231 | A | 0.75 | 0.5    | C |
| 13 | BICF2P1292661           | 8523291 | 0 | 0    | 0      | A |
| 13 | BICF2P778851            | 8541665 | 0 | 0    | 0      | C |
| 13 | TIGRP2P181379_rs9030370 | 8555877 | A | 0.75 | 0.5    | C |
| 13 | BICF2G630603571         | 8559700 | G | 0    | 0      | A |
| 13 | BICF2G630603587         | 8570574 | G | 0    | 0      | A |
| 13 | BICF2P494104            | 8597098 | G | 0.25 | 0.2143 | A |
| 13 | BICF2G630603616         | 8609513 | G | 0    | 0      | A |
| 13 | BICF2G630603637         | 8622277 | G | 0    | 0      | A |
| 13 | BICF2P890617            | 8628066 | C | 0    | 0      | A |



|    |                 |         |   |      |        |   |
|----|-----------------|---------|---|------|--------|---|
| 13 | BICF2G630603662 | 8643743 | C | 0    | 0      | A |
| 13 | BICF2G630603677 | 8664419 | G | 0    | 0      | A |
| 13 | BICF2G630603698 | 8673599 | A | 0    | 0      | G |
| 13 | BICF2G630603719 | 8682536 | A | 0    | 0      | C |
| 13 | BICF2P586094    | 8705560 | 0 | 0    | 0      | A |
| 13 | BICF2G630603723 | 8726417 | A | 0    | 0.2857 | C |
| 13 | BICF2G630603728 | 8731297 | A | 0    | 0.2857 | C |
| 13 | BICF2G630603731 | 8748568 | G | 0    | 0.2857 | A |
| 13 | BICF2G630603732 | 8753528 | G | 0    | 0.25   | A |
| 13 | BICF2G630603735 | 8768409 | A | 0    | 0.2857 | G |
| 13 | BICF2S2456735   | 8776401 | C | 0    | 0      | A |
| 13 | BICF2P1038537   | 8790128 | 0 | 0    | 0      | C |
| 13 | BICF2G630603736 | 8809291 | 0 | 0    | 0      | A |
| 13 | BICF2G630603739 | 8828643 | G | 0    | 0.2857 | A |
| 13 | BICF2G630603749 | 8843093 | 0 | 0    | 0      | G |
| 13 | BICF2P1414212   | 8853634 | C | 0    | 0      | A |
| 13 | BICF2P347710    | 8866156 | C | 0    | 0      | G |
| 13 | BICF2G630603771 | 8874163 | G | 0    | 0.2857 | A |
| 13 | BICF2G630603779 | 8880869 | A | 0    | 0.2857 | G |
| 13 | BICF2G630603792 | 8889804 | A | 0    | 0.2857 | G |
| 13 | BICF2P33744     | 8909924 | A | 0.25 | 0.2143 | C |
| 13 | BICF2G630603806 | 8913536 | G | 0    | 0.2857 | A |
| 13 | BICF2G630603817 | 8927987 | G | 0    | 0.2857 | A |
| 13 | BICF2G630603823 | 8939926 | A | 0    | 0.2857 | C |
| 13 | BICF2G630603827 | 8949554 | G | 0.25 | 0.5    | A |
| 13 | BICF2S23143168  | 8962280 | G | 0.25 | 0.2143 | A |
| 13 | BICF2S23355180  | 8970080 | G | 0.25 | 0.2143 | A |
| 13 | BICF2G630603839 | 8990142 | G | 0    | 0      | A |
| 13 | BICF2P235011    | 8999700 | 0 | 0    | 0      | A |
| 13 | BICF2G630603845 | 9015640 | A | 0    | 0      | G |
| 13 | BICF2S23640649  | 9024539 | G | 0.25 | 0.2143 | A |
| 13 | BICF2G630603862 | 9035438 | A | 0    | 0      | G |
| 13 | BICF2G630603865 | 9039021 | G | 0    | 0      | A |
| 13 | BICF2P872271    | 9058565 | A | 0    | 0      | G |
| 13 | BICF2P451803    | 9065696 | A | 0    | 0      | G |
| 13 | BICF2G630603880 | 9077287 | G | 1    | 0.5    | A |
| 13 | BICF2G630603885 | 9093802 | G | 0.75 | 0.7857 | A |
| 13 | BICF2G630603890 | 9100021 | A | 0.75 | 0.7857 | G |
| 13 | BICF2G630603902 | 9112226 | A | 0.75 | 0.7857 | G |
| 13 | BICF2G630603915 | 9120371 | A | 0.25 | 0.2143 | G |
| 13 | BICF2G630603929 | 9136758 | C | 0.25 | 0.2143 | A |
| 13 | BICF2G630603937 | 9143429 | A | 0.75 | 0.7857 | G |
| 13 | BICF2P787831    | 9158719 | 0 | 0    | 0      | A |
| 13 | BICF2G630603951 | 9175770 | G | 0.75 | 0.4286 | A |
| 13 | BICF2G630603952 | 9177584 | C | 0.75 | 0.4286 | A |
| 13 | BICF2P264618    | 9190458 | 0 | 0    | 0      | A |
| 13 | BICF2G630603957 | 9201177 | 0 | 0    | 0      | G |

|    |                         |         |   |      |        |   |
|----|-------------------------|---------|---|------|--------|---|
| 13 | BICF2P1306594           | 9212814 | A | 0    | 0      | G |
| 13 | BICF2G630603961         | 9232063 | C | 0.75 | 0.4286 | A |
| 13 | BICF2G630603964         | 9236734 | G | 0.75 | 0.4286 | A |
| 13 | BICF2P1373914           | 9249895 | 0 | 0    | 0      | A |
| 13 | BICF2G630603967         | 9260105 | A | 0.75 | 0.4286 | G |
| 13 | BICF2S23913925          | 9276040 | A | 0    | 0      | G |
| 13 | TIGRP2P181410_rs8823670 | 9284847 | 0 | 0    | 0      | C |
| 13 | BICF2G630603982         | 9294240 | A | 0.75 | 0.4286 | G |
| 13 | BICF2G630603988         | 9312669 | A | 0.25 | 0.5714 | T |
| 13 | BICF2G630603989         | 9315602 | G | 0.25 | 0.5714 | A |
| 13 | BICF2P480953            | 9327957 | A | 0.75 | 0.4286 | G |
| 13 | BICF2G630604010         | 9338939 | A | 0.75 | 0.4286 | C |
| 13 | BICF2G630604036         | 9366796 | A | 0.5  | 0.7857 | G |
| 13 | BICF2G630604041         | 9376051 | A | 0.25 | 0.5714 | G |
| 13 | BICF2G630604056         | 9391939 | G | 0.25 | 0.2857 | A |
| 13 | BICF2G630604061         | 9396244 | G | 0.25 | 0.2857 | A |
| 13 | BICF2G630604069         | 9412241 | G | 0.25 | 0.2857 | A |
| 13 | BICF2G630604073         | 9425427 | G | 0.5  | 0.5    | C |
| 13 | BICF2G630604075         | 9436758 | A | 0.5  | 0.5    | G |
| 13 | BICF2G630604084         | 9446019 | 0 | 0    | 0      | G |
| 13 | BICF2G630604089         | 9460241 | A | 0.25 | 0.2857 | G |
| 13 | BICF2G630604094         | 9471791 | G | 0.25 | 0.2857 | A |
| 13 | BICF2G630604098         | 9478177 | A | 0.25 | 0.2857 | G |
| 13 | BICF2P656090            | 9489053 | A | 0.5  | 0.1667 | T |
| 13 | BICF2P533597            | 9500401 | 0 | 0    | 0      | A |
| 13 | BICF2G630604107         | 9511191 | A | 0.25 | 0.2857 | G |
| 13 | BICF2G630604126         | 9530387 | A | 0.75 | 0.5    | C |
| 13 | BICF2P413570            | 9542317 | C | 0.5  | 0.2143 | A |
| 13 | BICF2P413568            | 9542434 | A | 0.75 | 0.5    | G |
| 13 | BICF2G630604144         | 9547275 | 0 | 0    | 0      | A |
| 13 | BICF2G630604149         | 9556551 | A | 0.75 | 0.5    | G |
| 13 | BICF2P243755            | 9569071 | A | 0.5  | 0.2143 | G |
| 13 | BICF2P696406            | 9579735 | A | 0.25 | 0.2143 | G |
| 13 | TIGRP2P181413_rs9073163 | 9608084 | 0 | 0    | 0      | G |
| 13 | BICF2G630604154         | 9631366 | C | 0    | 0      | A |
| 13 | BICF2G630604180         | 9641925 | G | 0    | 0      | A |
| 13 | BICF2G630604186         | 9648877 | T | 0    | 0      | A |
| 13 | BICF2G630604187         | 9655009 | A | 0    | 0      | G |
| 13 | BICF2G630604193         | 9667029 | A | 0    | 0      | G |
| 13 | BICF2G630604202         | 9671587 | A | 0.25 | 0.2143 | G |
| 13 | BICF2S23112860          | 9693482 | G | 1    | 0.7143 | A |
| 13 | BICF2G630604211         | 9700593 | A | 0.75 | 0.7857 | G |
| 13 | BICF2G630604220         | 9713561 | A | 0.5  | 0.5    | C |
| 13 | BICF2P1001146           | 9718234 | A | 0.5  | 0.5    | G |
| 13 | BICF2G630604228         | 9736204 | A | 0.5  | 0.2143 | G |
| 13 | BICF2P249712            | 9741199 | A | 0.5  | 0.5    | C |
| 13 | BICF2G630604233         | 9752655 | G | 0    | 0      | A |

|    |                 |          |   |      |        |   |
|----|-----------------|----------|---|------|--------|---|
| 13 | BICF2S23736314  | 9766620  | A | 1    | 1      | C |
| 13 | BICF2P231533    | 9776710  | 0 | 0    | 0      | A |
| 13 | BICF2S23515572  | 9792541  | G | 0.5  | 0.7857 | A |
| 13 | BICF2G630604235 | 9809028  | A | 0    | 0      | G |
| 13 | BICF2P95340     | 9810571  | A | 0.75 | 0.5    | G |
| 13 | BICF2G630604236 | 9823464  | C | 0    | 0      | A |
| 13 | BICF2G630604241 | 9841710  | C | 0.75 | 0.7857 | A |
| 13 | BICF2P278090    | 9846943  | A | 0.75 | 0.7857 | G |
| 13 | BICF2G630604267 | 9862864  | G | 0.75 | 0.7857 | A |
| 13 | BICF2G630604277 | 9876033  | A | 0.75 | 0.7857 | G |
| 13 | BICF2G630604281 | 9882443  | G | 0.75 | 0.7857 | A |
| 13 | BICF2G630604307 | 9899740  | C | 0.5  | 0.2143 | A |
| 13 | BICF2G630604322 | 9906277  | A | 0.75 | 0.4286 | T |
| 13 | BICF2G630604327 | 9917267  | T | 0.75 | 0.4286 | A |
| 13 | BICF2P865483    | 9933429  | G | 0    | 0      | A |
| 13 | BICF2P1265506   | 9938868  | G | 0    | 0      | A |
| 13 | BICF2G630604348 | 9953636  | C | 0.5  | 0.2143 | A |
| 13 | BICF2P172330    | 9964262  | 0 | 0    | 0      | A |
| 13 | BICF2P1129070   | 9971940  | 0 | 0    | 0      | A |
| 13 | BICF2G630604368 | 9997980  | A | 0    | 0      | C |
| 13 | BICF2P550591    | 10007299 | C | 0    | 0      | A |
| 13 | BICF2P935905    | 10035670 | A | 1    | 1      | G |
| 13 | BICF2P265073    | 10044470 | A | 0    | 0      | C |
| 13 | BICF2S23155674  | 10055619 | C | 1    | 1      | A |
| 13 | BICF2P869769    | 10070026 | G | 0.75 | 0.7857 | A |
| 13 | BICF2P1275808   | 10084566 | A | 0.25 | 0.2143 | G |
| 13 | BICF2G630604383 | 10086210 | A | 0    | 0      | T |
| 13 | BICF2P925145    | 10101417 | C | 0.75 | 0.7857 | A |
| 13 | BICF2P989582    | 10102141 | A | 0.75 | 0.7857 | G |
| 13 | BICF2P1429591   | 10115775 | A | 0    | 0      | G |
| 13 | BICF2P1429586   | 10117059 | A | 0.75 | 0.7857 | T |
| 13 | BICF2P437114    | 10120443 | G | 0    | 0      | A |
| 13 | BICF2P437112    | 10120596 | G | 0    | 0      | A |
| 13 | BICF2G630604386 | 10135029 | G | 0    | 0      | C |
| 13 | BICF2S24321767  | 10152493 | A | 0    | 0      | G |
| 13 | BICF2S23512657  | 10157151 | G | 0    | 0      | A |
| 13 | BICF2G630604391 | 10175062 | A | 0    | 0      | G |
| 13 | BICF2G630604411 | 10182231 | A | 0    | 0      | G |
| 13 | BICF2G630604415 | 10184498 | G | 0.25 | 0.5714 | A |
| 13 | BICF2G630604417 | 10192590 | A | 0.25 | 0.5714 | G |
| 13 | BICF2P1231504   | 10210459 | G | 0    | 0      | A |
| 13 | BICF2S23727080  | 10214746 | A | 0    | 0      | G |
| 13 | BICF2P1130785   | 10225305 | A | 0    | 0      | G |
| 13 | BICF2G630604436 | 10236846 | A | 0.75 | 0.7857 | G |
| 13 | BICF2G630604442 | 10250132 | G | 0.75 | 0.7857 | A |
| 13 | BICF2P634248    | 10266126 | C | 0.75 | 0.7857 | G |
| 13 | BICF2G630604443 | 10270128 | G | 0.75 | 0.7857 | A |

|    |                 |          |   |      |        |   |
|----|-----------------|----------|---|------|--------|---|
| 13 | BICF2G630604463 | 10299977 | A | 0.75 | 0.7857 | G |
| 13 | BICF2P330444    | 10312827 | A | 0.75 | 0.5    | G |
| 13 | BICF2G630604479 | 10324590 | G | 0.75 | 0.5    | A |
| 13 | BICF2G630604494 | 10329416 | A | 0    | 0      | G |
| 13 | BICF2G630604496 | 10329710 | A | 0    | 0      | C |
| 13 | BICF2G630604512 | 10339055 | A | 0    | 0      | G |
| 13 | BICF2G630604541 | 10355725 | G | 0    | 0      | A |
| 13 | BICF2G630604551 | 10362349 | A | 0    | 0      | G |
| 13 | BICF2G630604590 | 10380255 | A | 0    | 0      | G |
| 13 | BICF2G630604608 | 10384632 | A | 0    | 0      | G |
| 13 | BICF2G630604629 | 10399296 | A | 0    | 0      | G |
| 13 | BICF2G630604655 | 10408414 | A | 0    | 0      | G |
| 13 | BICF2G630604676 | 10423744 | G | 0    | 0      | A |
| 13 | BICF2P310560    | 10436318 | A | 0.75 | 0.7857 | G |
| 13 | BICF2P975682    | 10444670 | A | 0.75 | 0.5    | G |
| 13 | BICF2G630604698 | 10457808 | A | 0    | 0      | G |
| 13 | BICF2G630604710 | 10468017 | A | 0    | 0.2857 | G |
| 13 | BICF2G630604723 | 10479954 | G | 0.75 | 0.5    | A |
| 13 | BICF2G630604725 | 10509063 | A | 0.75 | 0.5    | T |
| 13 | BICF2G630604727 | 10514481 | A | 0    | 0      | C |
| 13 | BICF2G630604729 | 10526648 | G | 0    | 0      | A |
| 13 | BICF2P526099    | 10537947 | A | 0.75 | 0.5    | G |
| 13 | BICF2P606262    | 10546978 | 0 | 0    | 0      | G |
| 13 | BICF2S22953483  | 10562921 | G | 0.25 | 0.5    | A |
| 13 | BICF2P1384135   | 10573452 | C | 0    | 0      | G |
| 13 | BICF2P583203    | 10584164 | G | 0    | 0      | A |
| 13 | BICF2P501999    | 10612476 | A | 0    | 0      | G |
| 13 | BICF2S22937164  | 10623213 | A | 0.25 | 0.5    | G |
| 13 | BICF2S2296327   | 10629032 | G | 0.25 | 0.2143 | A |
| 13 | BICF2S23223177  | 10644572 | A | 0    | 0.2857 | G |
| 13 | BICF2S23763039  | 10656321 | G | 0.25 | 0.5    | A |
| 13 | BICF2S23749989  | 10673760 | G | 0    | 0      | A |
| 13 | BICF2P903017    | 10686666 | 0 | 0    | 0      | A |
| 13 | BICF2G630604787 | 10719282 | 0 | 0    | 0      | A |
| 13 | BICF2P1337526   | 10733876 | 0 | 0    | 0      | G |
| 13 | BICF2G630604789 | 10745334 | G | 1    | 1      | C |
| 13 | BICF2S23056118  | 10755023 | G | 1    | 0.7143 | A |
| 13 | BICF2S22920359  | 10775477 | G | 0.75 | 0.5    | A |
| 13 | BICF2P85832     | 10801155 | A | 0    | 0      | G |
| 13 | BICF2G630604796 | 10819921 | G | 0.75 | 0.7857 | A |
| 13 | BICF2G630604797 | 10821593 | C | 0.75 | 0.7857 | A |
| 13 | BICF2P845571    | 10837111 | A | 0    | 0      | G |
| 13 | BICF2G630604828 | 10852921 | G | 0.75 | 0.7857 | A |
| 13 | BICF2G630604837 | 10857955 | A | 0.75 | 0.7857 | C |
| 13 | BICF2G630604851 | 10877143 | A | 0    | 0      | G |
| 13 | BICF2G630604855 | 10881117 | G | 0    | 0      | A |
| 13 | BICF2G630604865 | 10893926 | C | 0    | 0      | G |

|    |                 |          |   |      |        |   |
|----|-----------------|----------|---|------|--------|---|
| 13 | BICF2S23043043  | 10904747 | A | 0.75 | 0.5    | G |
| 13 | BICF2G630604902 | 10923168 | A | 0    | 0      | G |
| 13 | BICF2G630604915 | 10931249 | A | 0    | 0      | G |
| 13 | BICF2G630604934 | 10946917 | A | 0    | 0      | G |
| 13 | BICF2P144523    | 10949249 | A | 0    | 0      | G |
| 13 | BICF2P61075     | 10960844 | G | 0.25 | 0.2143 | A |
| 13 | BICF2P927359    | 10987746 | A | 0.75 | 0.5    | G |
| 13 | BICF2P1437856   | 10999826 | A | 0.75 | 0.7857 | G |
| 13 | BICF2G630604948 | 11007041 | A | 0.75 | 0.7857 | C |
| 13 | BICF2G630604951 | 11017292 | G | 0    | 0      | A |
| 13 | BICF2G630604960 | 11047731 | A | 0    | 0      | G |
| 13 | BICF2G630604966 | 11061820 | A | 0.25 | 0.2143 | G |
| 13 | BICF2G630604969 | 11074395 | A | 0.25 | 0.2143 | G |
| 13 | BICF2S23051794  | 11079568 | G | 0.25 | 0.2143 | A |
| 13 | BICF2P1055154   | 11095120 | A | 0    | 0      | G |
| 13 | BICF2G630604984 | 11097671 | G | 0.75 | 0.7857 | A |
| 13 | BICF2G630604996 | 11118383 | A | 0    | 0      | G |
| 13 | BICF2G630604997 | 11121755 | C | 0    | 0      | A |
| 13 | BICF2G630605021 | 11132643 | G | 0.75 | 0.7857 | A |
| 13 | BICF2G630605045 | 11150514 | A | 0.25 | 0.2143 | G |
| 13 | BICF2P909231    | 11155020 | A | 0    | 0      | G |
| 13 | BICF2G630605058 | 11166724 | A | 0.75 | 0.7857 | G |
| 13 | BICF2P419989    | 11188617 | A | 0    | 0.2857 | G |
| 13 | BICF2G630605068 | 11197372 | 0 | 0    | 0      | G |
| 13 | BICF2G630605079 | 11202610 | A | 0.75 | 0.5    | G |
| 13 | BICF2P293816    | 11220582 | 0 | 0    | 0      | A |
| 13 | BICF2S23135424  | 11224697 | A | 0    | 0      | C |
| 13 | BICF2P604375    | 11238628 | A | 0    | 0      | G |
| 13 | BICF2G630605092 | 11256817 | C | 0    | 0.1    | A |
| 13 | BICF2P1423563   | 11261655 | C | 0    | 0      | G |
| 13 | BICF2P282164    | 11270787 | 0 | 0    | 0      | A |
| 13 | BICF2P677087    | 11288082 | A | 0.25 | 0.2143 | G |
| 13 | BICF2P579064    | 11295844 | 0 | 0    | 0      | A |
| 13 | BICF2P946181    | 11308705 | 0 | 0    | 0      | A |
| 13 | BICF2S23141275  | 11318222 | A | 0.25 | 0.2143 | G |
| 13 | BICF2P497347    | 11344124 | 0 | 0    | 0      | A |
| 13 | BICF2S2297323   | 11360713 | A | 1    | 0.7143 | G |
| 13 | BICF2P795344    | 11366694 | G | 0.25 | 0.2143 | A |
| 13 | BICF2S23121336  | 11381435 | A | 0    | 0      | G |
| 13 | BICF2P787045    | 11385898 | A | 1    | 1      | G |
| 13 | BICF2P1510386   | 11401675 | A | 0    | 0      | G |
| 13 | BICF2P1389702   | 11415999 | A | 0    | 0      | G |
| 13 | BICF2P1371290   | 11425908 | A | 0    | 0      | G |
| 13 | BICF2S23054512  | 11434354 | A | 0    | 0      | G |
| 13 | BICF2S23012774  | 11448697 | G | 0    | 0      | A |
| 13 | BICF2G630605109 | 11466979 | A | 0.25 | 0.2143 | C |
| 13 | BICF2G630605129 | 11496408 | G | 1    | 0.7143 | A |

|    |                         |          |   |      |        |   |
|----|-------------------------|----------|---|------|--------|---|
| 13 | BICF2G630605143         | 11509194 | A | 0    | 0      | G |
| 13 | BICF2G630605148         | 11513549 | 0 | 0    | 0      | G |
| 13 | BICF2G630605160         | 11528745 | G | 0    | 0      | A |
| 13 | BICF2G630605193         | 11542152 | G | 0    | 0      | A |
| 13 | BICF2P32064             | 11547853 | G | 0    | 0      | A |
| 13 | BICF2G630605222         | 11560350 | A | 0    | 0      | G |
| 13 | BICF2G630605234         | 11570084 | A | 0    | 0      | G |
| 13 | BICF2G630605270         | 11593074 | A | 0    | 0      | C |
| 13 | BICF2G630605297         | 11610207 | A | 0    | 0      | G |
| 13 | BICF2S23527822          | 11616021 | C | 0.75 | 0.7857 | A |
| 13 | BICF2G630605313         | 11636793 | T | 0.75 | 0.7857 | A |
| 13 | BICF2G630605317         | 11643024 | C | 0    | 0      | A |
| 13 | BICF2G630605333         | 11655718 | A | 0    | 0      | G |
| 13 | BICF2G630605339         | 11659792 | A | 0    | 0      | G |
| 13 | BICF2G630605340         | 11660194 | G | 0    | 0      | A |
| 13 | BICF2G630605341         | 11661960 | A | 0    | 0      | G |
| 13 | BICF2P112526            | 11678731 | A | 0    | 0      | G |
| 13 | BICF2G630605342         | 11686241 | 0 | 0    | 0      | A |
| 13 | BICF2G630605344         | 11695899 | C | 0.75 | 0.5    | A |
| 13 | BICF2P182473            | 11728542 | G | 0    | 0.2857 | A |
| 13 | BICF2G630605349         | 11733448 | G | 0    | 0      | A |
| 13 | BICF2G630605354         | 11742565 | A | 0.25 | 0.5    | G |
| 13 | BICF2G630605356         | 11777117 | G | 0.25 | 0.2143 | A |
| 13 | BICF2G630605357         | 11790465 | C | 0.25 | 0.2143 | G |
| 13 | BICF2G630605367         | 11810072 | A | 0    | 0      | G |
| 13 | BICF2G630605369         | 11811625 | G | 0.25 | 0.5    | A |
| 13 | BICF2S23340769          | 11811850 | A | 0.25 | 0.5    | G |
| 13 | BICF2G630605374         | 11833265 | A | 0    | 0      | G |
| 13 | BICF2G630605379         | 11834689 | A | 0.25 | 0.5    | G |
| 13 | BICF2S2447904           | 11847620 | A | 0    | 0      | T |
| 13 | BICF2P1251877           | 11862371 | 0 | 0    | 0      | A |
| 13 | BICF2G630605401         | 11870370 | G | 0    | 0      | A |
| 13 | BICF2S23654432          | 11885247 | A | 0.5  | 0.5    | C |
| 13 | TIGRP2P174168_rs9094905 | 11906944 | 0 | 0    | 0      | C |
| 13 | BICF2G630605405         | 11920014 | G | 0    | 0      | A |
| 13 | BICF2G630605407         | 11926079 | A | 0.5  | 0.2143 | C |
| 13 | BICF2G630605411         | 11938203 | T | 0    | 0.2857 | A |
| 13 | BICF2S2331377           | 11958909 | G | 0.25 | 0.2143 | A |
| 13 | BICF2G630605426         | 11972718 | A | 0.25 | 0.2857 | G |
| 13 | BICF2G630605438         | 11989716 | G | 0.25 | 0.2857 | C |
| 13 | BICF2G630605442         | 11994854 | G | 0    | 0      | A |
| 13 | BICF2G630605449         | 12023598 | G | 0.25 | 0.2857 | A |
| 13 | BICF2G630605454         | 12035109 | A | 0.25 | 0.2857 | G |
| 13 | BICF2G630605460         | 12043708 | G | 0.25 | 0.2857 | A |
| 13 | BICF2P983123            | 12052105 | G | 0.25 | 0.2857 | A |
| 13 | BICF2P1144501           | 12064248 | T | 0.25 | 0.2857 | A |
| 13 | BICF2G630605491         | 12075858 | C | 0.25 | 0.2857 | G |

|    |                 |          |   |      |        |   |
|----|-----------------|----------|---|------|--------|---|
| 13 | BICF2G630605500 | 12086712 | A | 0.25 | 0.2857 | C |
| 13 | BICF2G630605522 | 12106892 | A | 0    | 0      | G |
| 13 | BICF2P343967    | 12116369 | G | 0    | 0      | A |
| 13 | BICF2G630605526 | 12129387 | A | 0    | 0      | G |
| 13 | BICF2S22937486  | 12132815 | G | 0.75 | 0.7143 | A |
| 13 | BICF2G630605529 | 12144248 | A | 0    | 0      | G |
| 13 | BICF2G630605532 | 12161770 | A | 0    | 0      | G |
| 13 | BICF2G630605535 | 12174294 | A | 0.25 | 0.2857 | G |
| 13 | BICF2G630605541 | 12204152 | G | 0    | 0      | A |
| 13 | BICF2S22921708  | 12231229 | A | 0.75 | 0.7143 | G |
| 13 | BICF2G630605548 | 12242584 | A | 0    | 0      | C |
| 13 | BICF2G630605552 | 12251646 | A | 0.25 | 0.2857 | G |
| 13 | BICF2P435809    | 12260714 | C | 0    | 0      | A |
| 13 | BICF2S23130605  | 12275607 | C | 0    | 0      | A |
| 13 | BICF2P1270678   | 12283002 | A | 0    | 0      | G |
| 13 | BICF2G630605567 | 12296356 | A | 0    | 0      | G |
| 13 | BICF2G630605598 | 12315643 | A | 0    | 0      | T |
| 13 | BICF2G630605618 | 12323569 | G | 1    | 1      | A |
| 13 | BICF2G630605635 | 12331436 | 0 | 0    | 0      | A |
| 13 | BICF2P734712    | 12347011 | C | 0    | 0      | A |
| 13 | BICF2S22913351  | 12357456 | A | 1    | 1      | G |
| 13 | BICF2S22938994  | 12367011 | A | 1    | 1      | G |
| 13 | BICF2P1189575   | 12404823 | G | 0    | 0      | A |
| 13 | BICF2G630605644 | 12408947 | 0 | 0    | 0      | A |
| 13 | BICF2G630605650 | 12427550 | G | 0    | 0      | A |
| 13 | BICF2G630605663 | 12433017 | A | 0.5  | 0.7857 | G |
| 13 | BICF2G630605675 | 12451615 | A | 0.5  | 0.7857 | G |
| 13 | BICF2P456971    | 12473376 | A | 0.25 | 0.2143 | G |
| 13 | BICF2P616206    | 12479844 | G | 0.25 | 0.2143 | A |
| 13 | BICF2G630605680 | 12483674 | G | 0.25 | 0.2143 | C |
| 13 | BICF2P731314    | 12493666 | A | 0    | 0      | C |
| 13 | BICF2P96572     | 12509494 | A | 0.5  | 0.2143 | G |
| 13 | BICF2P375201    | 12513114 | G | 0    | 0      | A |
| 13 | BICF2S2337542   | 12534382 | A | 0    | 0      | G |
| 13 | BICF2P1372167   | 12539831 | G | 0    | 0      | A |
| 13 | BICF2S23642149  | 12549497 | A | 0    | 0      | G |
| 13 | BICF2G630605713 | 12561842 | A | 0    | 0      | G |
| 13 | BICF2G630605714 | 12562038 | G | 0    | 0      | A |
| 13 | BICF2G630605736 | 12579394 | A | 0    | 0      | G |
| 13 | BICF2G630605745 | 12583708 | G | 0    | 0      | A |
| 13 | BICF2G630605760 | 12601634 | A | 0    | 0      | G |
| 13 | BICF2G630605764 | 12605118 | A | 0    | 0      | G |
| 13 | BICF2G630605769 | 12618614 | A | 0    | 0      | G |
| 13 | BICF2G630605786 | 12628723 | A | 0    | 0      | G |
| 13 | BICF2G630605794 | 12644674 | C | 0    | 0      | A |
| 13 | BICF2G630605804 | 12653353 | G | 0    | 0      | A |
| 13 | BICF2P495552    | 12661694 | A | 0.5  | 0.7857 | G |

|    |                 |          |   |      |        |   |
|----|-----------------|----------|---|------|--------|---|
| 13 | BICF2G630605829 | 12685677 | A | 0    | 0      | G |
| 13 | BICF2G630605855 | 12697436 | A | 0    | 0      | C |
| 13 | BICF2G630605866 | 12707657 | A | 0.25 | 0.2143 | G |
| 13 | BICF2S23649766  | 12728215 | G | 0    | 0      | A |
| 13 | BICF2S23537943  | 12741556 | G | 0.25 | 0.5714 | A |
| 13 | BICF2S23029501  | 12748018 | A | 0.25 | 0.5714 | G |
| 13 | BICF2G630605874 | 12758804 | C | 0.25 | 0.2143 | G |
| 13 | BICF2G630605909 | 12783991 | A | 0.75 | 0.7857 | G |
| 13 | BICF2G630605914 | 12790841 | A | 0.75 | 0.7857 | G |
| 13 | BICF2G630605923 | 12804567 | C | 0.75 | 0.7857 | A |
| 13 | BICF2G630605935 | 12818267 | A | 0.25 | 0.2143 | C |
| 13 | BICF2G630605936 | 12831900 | A | 0    | 0      | C |
| 13 | BICF2G630605940 | 12837128 | A | 0    | 0      | G |
| 13 | BICF2P755556    | 12854536 | 0 | 0    | 0      | G |
| 13 | BICF2G630605965 | 12858496 | G | 0    | 0      | A |
| 13 | BICF2G630605982 | 12877115 | C | 0.25 | 0.2143 | A |
| 13 | BICF2G630605984 | 12880163 | C | 0    | 0      | A |
| 13 | BICF2S23350136  | 12897466 | G | 0.25 | 0.2143 | A |
| 13 | BICF2G630606011 | 12914215 | A | 0    | 0.1667 | G |
| 13 | BICF2P179492    | 12923537 | A | 0    | 0      | C |
| 13 | BICF2S23419869  | 12929609 | G | 0    | 0      | A |
| 13 | BICF2P977887    | 12938337 | C | 0    | 0      | A |
| 13 | BICF2P473110    | 12956551 | G | 0.75 | 0.7857 | A |
| 13 | BICF2P1268921   | 12964124 | G | 0    | 0      | C |
| 13 | BICF2G630606044 | 12984746 | G | 0    | 0      | A |
| 13 | BICF2S2418953   | 13005012 | G | 0.75 | 0.7857 | A |
| 13 | BICF2S23549758  | 13015954 | A | 1    | 0.7857 | C |
| 13 | BICF2P1141408   | 13020400 | A | 0.25 | 0.2143 | G |
| 13 | BICF2G630606061 | 13029923 | G | 0.75 | 0.7857 | C |
| 13 | BICF2G630606068 | 13035008 | G | 0    | 0      | A |
| 13 | BICF2G630606073 | 13042853 | A | 1    | 1      | G |
| 13 | BICF2P1094638   | 13061559 | 0 | 0    | 0      | G |
| 13 | BICF2P784470    | 13065667 | A | 0    | 0      | C |
| 13 | BICF2G630606101 | 13083847 | C | 0    | 0      | A |
| 13 | BICF2G630606105 | 13090256 | A | 0    | 0      | G |
| 13 | BICF2G630606109 | 13102322 | G | 0    | 0      | A |
| 13 | BICF2G630606112 | 13106665 | G | 0    | 0      | A |
| 13 | BICF2G630606119 | 13113451 | A | 0    | 0      | C |
| 13 | BICF2P238217    | 13122130 | A | 0.75 | 0.7857 | G |
| 13 | BICF2G630606150 | 13136320 | G | 0    | 0      | A |
| 13 | BICF2G630606164 | 13148662 | A | 0    | 0      | G |
| 13 | BICF2G630606173 | 13160159 | A | 0    | 0      | G |
| 13 | BICF2G630606178 | 13168740 | G | 0    | 0      | A |
| 13 | BICF2G630606199 | 13189273 | C | 0    | 0      | A |
| 13 | BICF2G630606204 | 13191679 | A | 0    | 0      | G |
| 13 | BICF2G630606215 | 13210254 | G | 0    | 0      | A |
| 13 | BICF2P79898     | 13228453 | A | 0.25 | 0.2143 | G |



|    |                         |          |   |      |        |   |
|----|-------------------------|----------|---|------|--------|---|
| 13 | BICF2G630606253         | 13242525 | A | 1    | 1      | C |
| 13 | BICF2G630606260         | 13249181 | A | 0.75 | 0.7857 | C |
| 13 | BICF2G630606264         | 13251143 | A | 0.75 | 0.7857 | G |
| 13 | BICF2G630606276         | 13260412 | A | 0.5  | 0.2143 | G |
| 13 | BICF2G630606287         | 13276331 | A | 0.75 | 0.4286 | G |
| 13 | BICF2P424681            | 13287200 | A | 0    | 0      | G |
| 13 | BICF2G630606320         | 13294754 | G | 0.25 | 0.2143 | A |
| 13 | BICF2G630606336         | 13307814 | A | 0.25 | 0.2143 | G |
| 13 | BICF2G630606347         | 13324714 | A | 0.25 | 0.5714 | G |
| 13 | BICF2G630606359         | 13352804 | G | 0.5  | 0.8333 | A |
| 13 | BICF2P1236779           | 13377903 | A | 0.5  | 0.7857 | G |
| 13 | BICF2S23020055          | 13389306 | A | 0    | 0      | G |
| 13 | BICF2P1383332           | 13400345 | C | 0.25 | 0.5714 | A |
| 13 | BICF2P334779            | 13415450 | A | 0    | 0      | G |
| 13 | TIGRP2P174225_rs8579944 | 13435687 | 0 | 0    | 0      | A |
| 13 | BICF2P1363793           | 13452641 | A | 0    | 0      | C |
| 13 | BICF2P956276            | 13456639 | A | 0    | 0      | G |
| 13 | BICF2G630606372         | 13489424 | A | 0    | 0      | G |
| 13 | BICF2S22958961          | 13503950 | A | 0.5  | 0.2143 | G |
| 13 | BICF2G630606394         | 13512854 | A | 0.5  | 0.5    | G |
| 13 | BICF2G630606409         | 13524718 | A | 0    | 0.25   | G |
| 13 | BICF2G630606422         | 13536438 | G | 0    | 0.2857 | A |
| 13 | BICF2G630606441         | 13550478 | C | 0.25 | 0.5714 | A |
| 13 | BICF2G630606469         | 13566203 | G | 0    | 0.2857 | A |
| 13 | BICF2G630606472         | 13571358 | G | 0.5  | 0.5    | A |
| 13 | TIGRP2P174239_rs9116345 | 13586198 | T | 0    | 0      | A |
| 13 | TIGRP2P174243_rs8843400 | 13599964 | 0 | 0    | 0      | G |
| 13 | BICF2S23136936          | 13605387 | G | 0.5  | 0.5    | A |
| 13 | BICF2P1020075           | 13618345 | G | 0.5  | 0.5    | A |
| 13 | TIGRP2P174250_rs8633052 | 13631864 | A | 0    | 0      | G |
| 13 | TIGRP2P174264_rs9206823 | 13641989 | G | 0    | 0      | A |
| 13 | G776f29S35              | 13678709 | A | 0    | 0      | G |
| 13 | BICF2P1442923           | 13697463 | 0 | 0    | 0      | A |
| 13 | TIGRP2P174297_rs9142603 | 13709367 | 0 | 0    | 0      | A |
| 13 | BICF2S2355934           | 13728275 | A | 0    | 0      | C |
| 13 | BICF2G630606490         | 13731432 | A | 0    | 0      | C |
| 13 | BICF2G630606492         | 13752108 | G | 0.5  | 0.8333 | A |
| 13 | BICF2G630606498         | 13756985 | A | 0.5  | 0.2143 | C |
| 13 | BICF2P326286            | 13775407 | A | 0    | 0.2857 | G |
| 13 | BICF2G630606511         | 13779935 | G | 0    | 0.2857 | A |
| 13 | BICF2P676226            | 13798535 | A | 0    | 0.2857 | G |
| 13 | BICF2S23529237          | 13810080 | G | 1    | 0.7143 | C |
| 13 | BICF2G630606542         | 13818618 | A | 0    | 0.2857 | G |
| 13 | BICF2G630606547         | 13824221 | C | 0    | 0.2857 | G |
| 13 | BICF2G630606594         | 13837358 | A | 0    | 0.2857 | G |
| 13 | BICF2G630606616         | 13863692 | C | 0    | 0.2857 | A |
| 13 | BICF2P325539            | 13874328 | 0 | 0    | 0      | A |

|    |                 |          |   |      |        |   |
|----|-----------------|----------|---|------|--------|---|
| 13 | BICF2G630606622 | 13891852 | A | 0.5  | 0.7857 | G |
| 13 | BICF2G630606628 | 13900155 | G | 0    | 0      | A |
| 13 | BICF2G630606636 | 13909066 | A | 0    | 0.2857 | G |
| 13 | BICF2G630606651 | 13931753 | A | 0    | 0.2    | G |
| 13 | BICF2P368108    | 13938384 | G | 0    | 0.2857 | A |
| 13 | BICF2G630606664 | 13960971 | A | 0.5  | 0.5    | T |
| 13 | BICF2P858215    | 13961864 | G | 0.5  | 0.5    | C |
| 13 | BICF2G630606687 | 13973404 | A | 0.5  | 0.2143 | G |
| 13 | BICF2G630606704 | 13988738 | A | 0    | 0.2857 | G |
| 13 | BICF2G630606729 | 14015331 | G | 0.5  | 0.5    | A |
| 13 | BICF2G630606737 | 14024771 | A | 0    | 0      | G |
| 13 | BICF2G630606770 | 14049234 | A | 0    | 0      | G |
| 13 | BICF2G630606785 | 14059619 | 0 | 0    | 0      | A |
| 13 | BICF2G630606796 | 14064512 | 0 | 0    | 0      | A |
| 13 | BICF2G630606810 | 14081168 | 0 | 0    | 0      | A |
| 13 | BICF2P1514025   | 14099317 | 0 | 0    | 0      | G |
| 13 | BICF2P1247499   | 14113322 | 0 | 0    | 0      | A |
| 13 | BICF2G630606859 | 14128789 | G | 0    | 0      | A |
| 13 | BICF2G630606863 | 14135020 | 0 | 0    | 0      | G |
| 13 | BICF2G630606876 | 14151994 | 0 | 0    | 0      | G |
| 13 | BICF2P230895    | 14167176 | 0 | 0    | 0      | A |
| 13 | BICF2G630606904 | 14179191 | G | 0.5  | 0.5    | A |
| 13 | BICF2G630606908 | 14179958 | 0 | 0    | 0      | G |
| 13 | BICF2G630606944 | 14191249 | 0 | 0    | 0      | A |
| 13 | BICF2G630606982 | 14209388 | G | 0.5  | 0.7857 | A |
| 13 | BICF2P898605    | 14223345 | A | 0    | 0      | G |
| 13 | BICF2G630606996 | 14226394 | A | 0    | 0      | G |
| 13 | BICF2G630607005 | 14238645 | A | 0.5  | 0.2143 | G |
| 13 | BICF2G630607017 | 14250439 | G | 0.5  | 0.2143 | A |
| 13 | BICF2P1148982   | 14253835 | A | 0.5  | 0.1667 | G |
| 13 | BICF2G630607050 | 14266777 | A | 0    | 0      | G |
| 13 | BICF2G630607069 | 14277606 | 0 | 0    | 0      | G |
| 13 | BICF2G630607086 | 14288091 | 0 | 0    | 0      | T |
| 13 | BICF2G630607091 | 14299706 | A | 0.25 | 0.2857 | G |
| 13 | BICF2G630607116 | 14311380 | C | 0.75 | 0.5    | A |
| 13 | BICF2G630607142 | 14323318 | G | 0.75 | 0.5    | A |
| 13 | BICF2G630607151 | 14329290 | G | 0.75 | 0.5    | A |
| 13 | BICF2G630607194 | 14347057 | A | 0.25 | 0.2857 | G |
| 13 | BICF2G630607200 | 14354781 | G | 0    | 0      | A |
| 13 | BICF2G630607218 | 14369108 | A | 0.25 | 0.2857 | G |
| 13 | BICF2G630607231 | 14376918 | A | 0.25 | 0.2857 | C |
| 13 | BICF2P228043    | 14393771 | G | 0.25 | 0.2857 | A |
| 13 | BICF2G630607271 | 14398386 | G | 0.75 | 0.5    | A |
| 13 | BICF2G630607287 | 14411209 | G | 0    | 0.25   | A |
| 13 | BICF2S2369397   | 14435575 | A | 0.5  | 0.2143 | C |
| 13 | BICF2P1355194   | 14446907 | A | 0    | 0      | C |
| 13 | BICF2P4530      | 14459237 | A | 0.5  | 0.7857 | G |

|    |                         |          |   |      |        |   |
|----|-------------------------|----------|---|------|--------|---|
| 13 | BICF2G630607304         | 14467359 | G | 0.5  | 0.7857 | A |
| 13 | BICF2G630607354         | 14489502 | A | 0.5  | 0.7857 | G |
| 13 | BICF2G630607357         | 14493610 | G | 0.5  | 0.7857 | A |
| 13 | BICF2G630607374         | 14511705 | G | 0    | 0      | A |
| 13 | BICF2G630607375         | 14513030 | A | 0.5  | 0.7857 | C |
| 13 | BICF2G630607398         | 14534944 | A | 0    | 0      | G |
| 13 | TIGRP2P174316_rs8961644 | 14549972 | 0 | 0    | 0      | A |
| 13 | BICF2G630607415         | 14566531 | G | 0    | 0      | A |
| 13 | BICF2S23118341          | 14588716 | G | 0.5  | 0.5    | A |
| 13 | BICF2P73506             | 14596590 | 0 | 0    | 0      | G |
| 13 | BICF2G630607426         | 14615683 | A | 0.25 | 0.2143 | G |
| 13 | BICF2G630607427         | 14616577 | G | 0    | 0      | A |
| 13 | BICF2G630607436         | 14628625 | T | 0.5  | 0.2143 | A |
| 13 | BICF2G630607458         | 14645635 | A | 0.25 | 0.2143 | C |
| 13 | BICF2S23056670          | 14662142 | A | 0.25 | 0.2143 | G |
| 13 | BICF2P400464            | 14671959 | A | 0.25 | 0.2857 | C |
| 13 | BICF2G630607518         | 14696748 | A | 0    | 0      | C |
| 13 | BICF2G630607527         | 14709529 | A | 0.5  | 0.2143 | G |
| 13 | BICF2G630607552         | 14720274 | C | 0    | 0.2857 | A |
| 13 | BICF2G630607609         | 14736978 | A | 0.5  | 0.5    | G |
| 13 | BICF2G630607626         | 14743952 | A | 0    | 0.2857 | G |
| 13 | BICF2G630607662         | 14760373 | A | 0    | 0.2857 | G |
| 13 | BICF2G630607693         | 14772700 | G | 0    | 0.2857 | A |
| 13 | BICF2P642361            | 14778759 | A | 0    | 0.2857 | G |
| 13 | BICF2G630607744         | 14794951 | T | 0    | 0.4    | A |
| 13 | BICF2G630607750         | 14800659 | A | 0    | 0.25   | G |
| 13 | BICF2G630607769         | 14815946 | G | 0    | 0.2857 | A |
| 13 | BICF2G630607789         | 14827317 | G | 0    | 0      | A |
| 13 | BICF2G630607798         | 14835520 | T | 0    | 0      | A |
| 13 | TIGRP2P174336_rs9031519 | 14869761 | 0 | 0    | 0      | G |
| 13 | BICF2G630607852         | 14906091 | A | 0    | 0      | G |
| 13 | BICF2G630607881         | 14924690 | T | 0    | 0.2857 | A |
| 13 | BICF2P258392            | 14929284 | G | 0.5  | 0.5    | A |
| 13 | BICF2G630607911         | 14956874 | A | 0    | 0.2857 | C |
| 13 | BICF2G630607915         | 14962441 | A | 0    | 0.2857 | G |
| 13 | BICF2G630607935         | 14981614 | G | 0.75 | 0.7143 | A |
| 13 | BICF2G630607941         | 14988044 | G | 0.75 | 0.7143 | A |
| 13 | BICF2G630607957         | 15000685 | A | 0.25 | 0.5    | G |
| 13 | TIGRP2P174343_rs9009012 | 15037033 | 0 | 0    | 0      | A |
| 13 | TIGRP2P174344_rs9090504 | 15042799 | 0 | 0    | 0      | A |
| 13 | BICF2P1290979           | 15058768 | 0 | 0    | 0      | G |
| 13 | BICF2G630607990         | 15086018 | A | 0.5  | 0.5    | G |
| 13 | BICF2G630607998         | 15092956 | G | 0    | 0.2857 | A |
| 13 | BICF2G630608012         | 15099980 | G | 0.5  | 0.1667 | A |
| 13 | BICF2G630608040         | 15114335 | A | 0    | 0      | G |
| 13 | BICF2G630608052         | 15123308 | G | 0.5  | 0.2143 | A |
| 13 | BICF2G630608084         | 15141777 | G | 0    | 0      | A |

|    |                         |          |   |      |        |   |
|----|-------------------------|----------|---|------|--------|---|
| 13 | TIGRP2P174348_rs9129973 | 15168356 | 0 | 0    | 0      | A |
| 13 | BICF2G630608157         | 15191159 | G | 0.75 | 0.4286 | A |
| 13 | BICF2P23129             | 15211017 | G | 0    | 0      | A |
| 13 | BICF2P1416809           | 15234045 | G | 0    | 0      | A |
| 13 | BICF2P559373            | 15237521 | G | 0    | 0      | A |
| 13 | BICF2G630608186         | 15258797 | G | 0.5  | 0.2143 | A |
| 13 | BICF2P427754            | 15269896 | A | 0.5  | 0.2143 | G |
| 13 | BICF2G630608208         | 15272122 | G | 0    | 0      | A |
| 13 | BICF2G630608219         | 15290837 | 0 | 0    | 0      | G |
| 13 | BICF2P118227            | 15296286 | C | 0.25 | 0.2857 | A |
| 13 | BICF2G630608229         | 15311125 | 0 | 0    | 0      | G |
| 13 | BICF2P600658            | 15318280 | A | 0.75 | 0.4286 | T |
| 13 | BICF2G630608259         | 15337568 | G | 0.25 | 0.2857 | A |
| 13 | BICF2P107209            | 15347141 | G | 0.25 | 0.2857 | A |
| 13 | BICF2G630608310         | 15357590 | 0 | 0    | 0      | C |
| 13 | BICF2P682956            | 15395071 | A | 0    | 0      | G |
| 13 | BICF2G630608384         | 15398985 | A | 0    | 0.2857 | G |
| 13 | BICF2G630608421         | 15430893 | C | 0.5  | 0.2143 | A |
| 13 | BICF2G630608425         | 15439408 | G | 0.5  | 0.2143 | A |
| 13 | BICF2G630608449         | 15455111 | G | 0.5  | 0.2143 | C |
| 13 | BICF2G630608453         | 15459715 | G | 0    | 0      | A |
| 13 | BICF2P332251            | 15468430 | G | 1    | 0.75   | A |
| 13 | BICF2G630608469         | 15478348 | A | 0    | 0      | C |
| 13 | BICF2G630608470         | 15480799 | A | 0    | 0      | G |
| 13 | BICF2G630608482         | 15491010 | G | 0    | 0      | A |
| 13 | BICF2P569888            | 15505823 | G | 0.25 | 0.2143 | A |
| 13 | BICF2P391669            | 15524588 | G | 0.25 | 0.5    | A |
| 13 | BICF2S23429332          | 15525394 | G | 0.25 | 0.2143 | A |
| 13 | BICF2G630608494         | 15543531 | G | 0.5  | 0.2143 | A |
| 13 | BICF2G630608509         | 15552601 | A | 0.25 | 0.2857 | G |
| 13 | BICF2G630608520         | 15562532 | G | 0.5  | 0.7857 | A |
| 13 | BICF2G630608529         | 15578427 | G | 0.5  | 0.7857 | A |
| 13 | BICF2G630608539         | 15585076 | A | 0    | 0.2857 | C |
| 13 | BICF2G630608576         | 15618350 | A | 0.5  | 0.1667 | G |
| 13 | BICF2S23229653          | 15630289 | A | 0.25 | 0.5    | G |
| 13 | BICF2P1020953           | 15644885 | A | 0.75 | 0.5    | G |
| 13 | BICF2P444802            | 15661056 | G | 0.75 | 0.5    | A |
| 13 | BICF2P697433            | 15671311 | A | 0.5  | 0.7857 | G |
| 13 | BICF2P706462            | 15674648 | G | 0.5  | 0.7857 | A |
| 13 | BICF2P367260            | 15687598 | A | 0.5  | 0.2143 | G |
| 13 | BICF2S23351493          | 15704100 | G | 0.25 | 0.5    | A |
| 13 | BICF2S23314761          | 15716180 | G | 0.75 | 0.5    | A |
| 13 | BICF2G630608587         | 15730678 | C | 0.5  | 0.2143 | A |
| 13 | BICF2G630608590         | 15735480 | A | 0    | 0      | G |
| 13 | BICF2P282286            | 15754838 | C | 0    | 0      | A |
| 13 | BICF2P937959            | 15757670 | A | 0    | 0      | G |
| 13 | BICF2P959871            | 15771226 | A | 0    | 0      | G |

|    |                         |          |   |      |        |   |
|----|-------------------------|----------|---|------|--------|---|
| 13 | BICF2G630608621         | 15791207 | 0 | 0    | 0      | G |
| 13 | TIGRP2P174365_rs8992332 | 15801524 | 0 | 0    | 0      | A |
| 13 | BICF2G630608635         | 15818506 | 0 | 0    | 0      | G |
| 13 | BICF2G630608655         | 15828687 | G | 0.25 | 0.2857 | A |
| 13 | BICF2G630608672         | 15838488 | 0 | 0    | 0      | G |
| 13 | BICF2G630608681         | 15856528 | A | 0    | 0      | G |
| 13 | BICF2S23426142          | 15874911 | A | 0    | 0      | G |
| 13 | BICF2G630608775         | 15910189 | G | 0.25 | 0.2857 | A |
| 13 | BICF2P1010731           | 15916307 | C | 0.25 | 0.2857 | A |
| 13 | BICF2G630608803         | 15931300 | A | 0    | 0.2857 | G |
| 13 | BICF2G630608825         | 15940101 | C | 0    | 0.2857 | A |
| 13 | BICF2S23243248          | 15952032 | A | 0    | 0.2857 | C |
| 13 | BICF2P1218213           | 15962115 | C | 0    | 0.2857 | A |
| 13 | BICF2S23117025          | 15977923 | A | 0    | 0.2857 | G |
| 13 | BICF2P1338587           | 15990756 | G | 0    | 0.2857 | A |
| 13 | BICF2P1281143           | 15998218 | G | 0    | 0      | A |
| 13 | BICF2P724747            | 16013330 | C | 0    | 0      | A |
| 13 | BICF2S23447349          | 16028699 | C | 0    | 0      | A |
| 13 | TIGRP2P174372_rs9146977 | 16041739 | 0 | 0    | 0      | G |
| 13 | BICF2P458545            | 16053832 | C | 0    | 0.2857 | A |
| 13 | BICF2P458542            | 16054696 | A | 0    | 0.2857 | G |
| 13 | BICF2P927955            | 16072110 | A | 0    | 0.2857 | G |
| 13 | BICF2P253177            | 16078813 | C | 0    | 0.25   | A |
| 13 | BICF2G630608900         | 16104035 | A | 0    | 0      | G |
| 13 | BICF2G630608907         | 16112969 | A | 0    | 0.2    | C |
| 13 | BICF2P1137239           | 16127731 | C | 0.25 | 0.2143 | A |
| 13 | BICF2P443346            | 16134695 | A | 0.5  | 0.5    | G |
| 13 | BICF2G630608922         | 16147863 | G | 0    | 0      | A |
| 13 | BICF2P1096460           | 16178746 | A | 1    | 1      | G |
| 13 | BICF2P1034847           | 16184801 | G | 0    | 0      | A |
| 13 | BICF2P1342383           | 16196451 | G | 0    | 0      | A |
| 13 | BICF2G630608962         | 16212235 | A | 1    | 0.7143 | G |
| 13 | BICF2G630608964         | 16216325 | A | 0    | 0      | G |
| 13 | BICF2G630609005         | 16232640 | A | 0.25 | 0.2857 | G |
| 13 | BICF2P691115            | 16241176 | G | 0.75 | 0.7143 | A |
| 13 | BICF2G630609023         | 16250736 | G | 0.75 | 0.75   | A |
| 13 | BICF2G630609041         | 16264888 | C | 0    | 0      | A |
| 13 | BICF2P1156115           | 16281369 | A | 0    | 0      | G |
| 13 | BICF2G630609048         | 16291310 | G | 0    | 0      | A |
| 13 | BICF2P527722            | 16303034 | A | 0    | 0      | G |
| 13 | BICF2G630609054         | 16308332 | G | 0    | 0      | A |
| 13 | BICF2G630609069         | 16324952 | A | 0    | 0      | C |
| 13 | BICF2G630609072         | 16334230 | A | 0    | 0      | G |
| 13 | BICF2G630609083         | 16343990 | A | 0    | 0      | G |
| 13 | BICF2G630609095         | 16357891 | 0 | 0    | 0      | G |
| 13 | BICF2G630609098         | 16365807 | A | 0    | 0      | G |
| 13 | BICF2P418166            | 16383882 | A | 0.5  | 0.2143 | G |

|    |                 |          |   |     |        |   |
|----|-----------------|----------|---|-----|--------|---|
| 13 | BICF2G630609105 | 16387682 | A | 0.5 | 0.2143 | C |
| 13 | BICF2G630609117 | 16407916 | C | 0   | 0      | A |
| 13 | BICF2G630609128 | 16418786 | C | 0   | 0      | A |
| 13 | BICF2G630609131 | 16423609 | A | 0   | 0      | G |
| 13 | BICF2P122442    | 16440965 | G | 0.5 | 0.2143 | A |
| 13 | BICF2P1374319   | 16447547 | T | 0.5 | 0.2143 | A |
| 13 | BICF2P324148    | 16470506 | A | 0.5 | 0.7857 | G |
| 13 | BICF2P691752    | 16479993 | A | 0.5 | 0.5    | C |
| 13 | BICF2P37931     | 16498449 | C | 1   | 0.7143 | A |
| 13 | BICF2P592164    | 16504816 | G | 0.5 | 0.5    | A |
| 13 | BICF2P1190101   | 16515963 | A | 1   | 0.7143 | G |
| 13 | BICF2P576736    | 16528543 | A | 1   | 0.7143 | C |
| 13 | BICF2P702755    | 16540980 | A | 1   | 0.7143 | G |
| 13 | BICF2P659539    | 16550468 | A | 0.5 | 0.5    | G |
| 13 | BICF2P201866    | 16570304 | 0 | 0   | 0      | G |
| 13 | BICF2S23024538  | 16573431 | A | 0.5 | 0.5    | G |
| 13 | BICF2P65609     | 16587028 | 0 | 0   | 0      | G |
| 13 | BICF2G630609185 | 16604204 | A | 0   | 0      | C |
| 13 | BICF2G630609187 | 16616126 | A | 0   | 0      | G |
| 13 | BICF2G630609188 | 16632070 | G | 0.5 | 0.5    | A |
| 13 | BICF2G630609206 | 16646750 | A | 0   | 0      | G |
| 13 | BICF2G630609210 | 16653879 | G | 1   | 0.75   | A |
| 13 | BICF2G630609218 | 16665562 | G | 0.5 | 0.5    | A |
| 13 | BICF2G630609230 | 16678254 | A | 0   | 0      | G |
| 13 | BICF2G630609238 | 16687463 | G | 0.5 | 0.2143 | A |
| 13 | BICF2G630609247 | 16702300 | A | 0   | 0      | G |
| 13 | BICF2G630609252 | 16713354 | C | 0.5 | 0.5    | G |
| 13 | BICF2P916087    | 16727996 | G | 0   | 0      | A |
| 13 | BICF2P1368819   | 16742602 | A | 0.5 | 0.2143 | G |
| 13 | BICF2S23746346  | 16745557 | A | 0.5 | 0.2143 | G |
| 13 | BICF2G630609294 | 16755517 | A | 0.5 | 0.2143 | G |
| 13 | BICF2G630609308 | 16767183 | A | 0   | 0      | G |
| 13 | BICF2G630609317 | 16780994 | A | 0.5 | 0.5    | G |
| 13 | BICF2G630609336 | 16798626 | A | 0   | 0      | G |
| 13 | BICF2G630609340 | 16807766 | A | 0   | 0      | G |
| 13 | BICF2G630609347 | 16822501 | A | 0.5 | 0.7857 | G |
| 13 | BICF2S23252574  | 16835923 | A | 0.5 | 0.7857 | G |
| 13 | BICF2P1303880   | 16858375 | G | 0   | 0.2857 | A |
| 13 | BICF2S2304146   | 16859084 | A | 0   | 0.2857 | G |
| 13 | BICF2P709645    | 16893476 | A | 1   | 1      | G |
| 13 | BICF2P566325    | 16911034 | G | 0   | 0.2857 | A |
| 13 | BICF2G630609471 | 16924503 | A | 0.5 | 0.7857 | C |
| 13 | BICF2G630609484 | 16930813 | G | 1   | 0.7143 | A |
| 13 | BICF2G630609499 | 16948056 | C | 1   | 1      | A |
| 13 | BICF2P177257    | 16956506 | A | 0.5 | 0.7857 | G |
| 13 | BICF2S23310924  | 16968473 | A | 0   | 0      | G |
| 13 | BICF2G630609534 | 16977695 | G | 0.5 | 0.7857 | A |

|    |                         |          |   |     |        |   |
|----|-------------------------|----------|---|-----|--------|---|
| 13 | BICF2G630609547         | 16986654 | G | 0.5 | 0.2143 | A |
| 13 | BICF2G630609566         | 17004861 | A | 0   | 0      | G |
| 13 | BICF2G630609583         | 17009253 | G | 0   | 0      | A |
| 13 | BICF2G630609616         | 17022988 | A | 0   | 0      | C |
| 13 | BICF2G630609618         | 17031824 | A | 0   | 0      | G |
| 13 | BICF2G630609629         | 17050439 | A | 0   | 0      | G |
| 13 | BICF2P126512            | 17057745 | A | 0   | 0.2857 | C |
| 13 | BICF2P199121            | 17069242 | C | 0   | 0.2857 | A |
| 13 | BICF2P1394023           | 17079223 | A | 0   | 0      | G |
| 13 | BICF2P592467            | 17098799 | C | 0.5 | 0.5    | A |
| 13 | BICF2G630609638         | 17107860 | A | 0.5 | 0.5    | G |
| 13 | BICF2G630609650         | 17119907 | G | 1   | 0.7143 | C |
| 13 | BICF2G630609661         | 17126829 | G | 0.5 | 0.2143 | A |
| 13 | BICF2G630609680         | 17135617 | A | 0   | 0.2857 | G |
| 13 | BICF2G630609693         | 17152115 | G | 0.5 | 0.7857 | A |
| 13 | BICF2G630609704         | 17169345 | G | 0.5 | 0.5    | A |
| 13 | BICF2G630609705         | 17177648 | A | 0.5 | 0.5    | C |
| 13 | BICF2G630609714         | 17183233 | A | 0.5 | 0.5    | G |
| 13 | BICF2G630609720         | 17192865 | A | 1   | 0.7143 | T |
| 13 | BICF2P1278590           | 17206716 | A | 0.5 | 0.5    | G |
| 13 | BICF2P674390            | 17217545 | A | 0   | 0.2857 | G |
| 13 | BICF2S23628247          | 17228680 | T | 0.5 | 0.5    | A |
| 13 | BICF2P440772            | 17238503 | C | 0.5 | 0.5    | A |
| 13 | BICF2S2451146           | 17254397 | G | 0.5 | 0.2143 | A |
| 13 | BICF2G630609725         | 17281819 | G | 0   | 0      | A |
| 13 | BICF2S23434059          | 17287625 | A | 0.5 | 0.1    | G |
| 13 | BICF2S23728188          | 17320269 | G | 0.5 | 0.2143 | A |
| 13 | BICF2G630609728         | 17331809 | 0 | 0   | 0      | G |
| 13 | BICF2P221691            | 17375197 | G | 1   | 1      | A |
| 13 | BICF2G630609738         | 17382563 | A | 1   | 1      | C |
| 13 | BICF2G630609742         | 17390354 | C | 0   | 0      | A |
| 13 | BICF2G630609767         | 17406396 | G | 0.5 | 0.2143 | A |
| 13 | BICF2G630609771         | 17413915 | G | 0.5 | 0.2143 | A |
| 13 | BICF2G630609780         | 17431857 | A | 0.5 | 0.2143 | G |
| 13 | BICF2P573695            | 17441598 | A | 0.5 | 0.2143 | G |
| 13 | TIGRP2P174400_rs8882081 | 17452625 | 0 | 0   | 0      | A |
| 13 | BICF2G630609796         | 17460489 | C | 0   | 0      | A |
| 13 | BICF2G630609803         | 17472480 | G | 0   | 0      | A |
| 13 | BICF2G630609838         | 17482304 | A | 0   | 0      | G |
| 13 | BICF2G630609840         | 17499527 | A | 0   | 0      | G |
| 13 | BICF2P1374610           | 17511274 | T | 0   | 0      | A |
| 13 | BICF2P137534            | 17517516 | 0 | 0   | 0      | A |
| 13 | BICF2S23761384          | 17541770 | C | 0.5 | 0.2143 | A |
| 13 | BICF2P760434            | 17554950 | A | 0.5 | 0.7857 | G |
| 13 | BICF2P1159742           | 17562554 | A | 0   | 0      | G |
| 13 | BICF2P693726            | 17575194 | T | 0   | 0.2857 | A |
| 13 | BICF2P487470            | 17587486 | A | 0   | 0.2857 | T |

|    |                         |          |   |     |        |   |
|----|-------------------------|----------|---|-----|--------|---|
| 13 | BICF2S2447015           | 17606355 | 0 | 0   | 0      | T |
| 13 | BICF2G630609849         | 17616813 | A | 0   | 0.2857 | G |
| 13 | BICF2G630609859         | 17628548 | A | 0.5 | 0.5    | G |
| 13 | BICF2G630609888         | 17636233 | A | 0.5 | 0.5    | G |
| 13 | BICF2P109462            | 17645457 | 0 | 0   | 0      | A |
| 13 | BICF2G630609928         | 17661686 | A | 0   | 0.2857 | T |
| 13 | BICF2S2432564           | 17666338 | C | 0.5 | 0.5    | A |
| 13 | BICF2G630609937         | 17679064 | A | 0   | 0.2857 | G |
| 13 | BICF2G630609968         | 17692957 | A | 0   | 0.2857 | G |
| 13 | BICF2G630609980         | 17698811 | C | 0   | 0      | A |
| 13 | BICF2G630610018         | 17711775 | G | 0   | 0      | A |
| 13 | BICF2P659763            | 17724702 | A | 0   | 0.2857 | G |
| 13 | BICF2G630610034         | 17736261 | A | 0.5 | 0.2143 | G |
| 13 | BICF2S2414989           | 17763039 | 0 | 0   | 0      | A |
| 13 | TIGRP2P174402_rs8542477 | 17768859 | 0 | 0   | 0      | G |
| 13 | BICF2P347506            | 17795829 | 0 | 0   | 0      | G |
| 13 | BICF2P221270            | 17804651 | G | 0.5 | 0.5    | A |
| 13 | BICF2P1468218           | 17819592 | A | 0.5 | 0.5    | G |
| 13 | BICF2P1468219           | 17819909 | A | 0.5 | 0.5    | G |
| 13 | BICF2P795796            | 17827695 | G | 0.5 | 0.5    | A |
| 13 | BICF2P795795            | 17827925 | T | 0.5 | 0.5    | A |
| 13 | BICF2S23320535          | 17868449 | G | 0.5 | 0.5    | A |
| 13 | BICF2P440915            | 17875681 | G | 0.5 | 0.5    | A |
| 13 | BICF2P1306822           | 17883835 | G | 0.5 | 0.5    | A |
| 13 | BICF2G630610050         | 17901965 | A | 0   | 0      | G |
| 13 | BICF2P436849            | 17910801 | G | 0.5 | 0.5    | A |
| 13 | BICF2G630610053         | 17918792 | 0 | 0   | 0      | A |
| 13 | BICF2P1001247           | 17930038 | A | 0.5 | 0.5    | G |
| 13 | BICF2P336900            | 17946556 | G | 0.5 | 0.5    | A |
| 13 | BICF2P1247872           | 17959985 | C | 0.5 | 0.5    | A |
| 13 | BICF2P721572            | 17965606 | A | 0.5 | 0.5    | G |
| 13 | BICF2P95378             | 17966017 | G | 0   | 0.2857 | A |
| 13 | BICF2G630610055         | 17976673 | 0 | 0   | 0      | G |
| 13 | BICF2P1308303           | 17992322 | A | 0.5 | 0.5    | G |
| 13 | BICF2G630610057         | 18002076 | 0 | 0   | 0      | G |
| 13 | BICF2P535652            | 18011429 | G | 0.5 | 0.5    | A |
| 13 | BICF2P1145308           | 18020832 | G | 0.5 | 0.5    | C |
| 13 | BICF2P274251            | 18038511 | A | 0.5 | 0.5    | G |
| 13 | BICF2P737500            | 18047801 | G | 0   | 0      | A |
| 13 | TIGRP2P174408_rs9097400 | 18056193 | 0 | 0   | 0      | C |
| 13 | BICF2G630610094         | 18074753 | A | 0   | 0      | G |
| 13 | BICF2G630610097         | 18079579 | A | 0.5 | 0.5    | G |
| 13 | BICF2G630610101         | 18093370 | A | 0   | 0      | G |
| 13 | BICF2P570629            | 18104940 | A | 1   | 0.7143 | C |
| 13 | BICF2G630610103         | 18118401 | G | 0   | 0      | A |
| 13 | BICF2G630610114         | 18126197 | C | 0   | 0      | A |
| 13 | BICF2P681073            | 18137327 | A | 0.5 | 0.2143 | G |



|    |                 |          |   |      |        |   |
|----|-----------------|----------|---|------|--------|---|
| 13 | BICF2S22933732  | 18151469 | G | 0    | 0      | A |
| 13 | BICF2G630610130 | 18162128 | A | 0    | 0      | C |
| 13 | BICF2G630610143 | 18171797 | G | 0.5  | 0.7857 | A |
| 13 | BICF2S23740057  | 18183940 | G | 0.5  | 0.7857 | A |
| 13 | BICF2P585973    | 18198633 | A | 0.5  | 0.2143 | G |
| 13 | BICF2P999805    | 18204568 | A | 0.5  | 0.2143 | G |
| 13 | BICF2P1124215   | 18220505 | A | 0.5  | 0.2143 | G |
| 13 | BICF2P1156779   | 18229058 | A | 0.5  | 0.2143 | G |
| 13 | BICF2P1100337   | 18250593 | A | 1    | 0.7143 | G |
| 13 | BICF2S22947617  | 18263993 | A | 0    | 0      | C |
| 13 | BICF2S23513111  | 18284485 | A | 0    | 0      | G |
| 13 | BICF2P140672    | 18295953 | 0 | 0    | 0      | A |
| 13 | BICF2S23728635  | 18304264 | G | 0.5  | 0.5    | A |
| 13 | BICF2P560437    | 18317514 | A | 0.25 | 0.3571 | G |
| 13 | BICF2P761116    | 18327967 | A | 0.25 | 0.3571 | G |
| 13 | BICF2P1044750   | 18333447 | A | 0.25 | 0.1429 | C |
| 13 | BICF2P378783    | 18344146 | G | 0.25 | 0.3571 | A |
| 13 | BICF2P496834    | 18367880 | A | 0.25 | 0.3571 | G |
| 13 | BICF2S22934651  | 18376372 | A | 0    | 0.2857 | G |
| 13 | BICF2P666259    | 18384664 | A | 0.75 | 0.3571 | G |
| 13 | BICF2P1343519   | 18389026 | G | 0.75 | 0.3571 | A |
| 13 | BICF2P987185    | 18408979 | A | 0.25 | 0.3571 | G |
| 13 | BICF2P1157596   | 18414326 | C | 0.25 | 0.3571 | A |
| 13 | BICF2P197597    | 18427769 | G | 0.5  | 0.5    | A |
| 13 | BICF2P579556    | 18435845 | 0 | 0    | 0      | G |
| 13 | BICF2P413719    | 18451783 | A | 0.25 | 0.5    | G |
| 13 | BICF2P404671    | 18462961 | A | 0.5  | 0.5    | G |
| 13 | BICF2S23613764  | 18471300 | G | 0.5  | 0.2143 | A |
| 13 | BICF2S2362259   | 18480894 | A | 0.25 | 0.1429 | G |
| 13 | BICF2P682740    | 18499006 | A | 0.75 | 0.8571 | G |
| 13 | BICF2P1311798   | 18507470 | G | 0    | 0      | A |
| 13 | BICF2P1313740   | 18518467 | A | 0    | 0      | C |
| 13 | BICF2P39358     | 18529754 | C | 0.75 | 0.8571 | G |
| 13 | BICF2P177786    | 18544009 | A | 0.25 | 0.1429 | G |
| 13 | BICF2P437154    | 18553964 | G | 0.25 | 0.6429 | A |
| 13 | BICF2P765861    | 18562825 | A | 0.25 | 0.1429 | C |
| 13 | BICF2P459552    | 18576007 | G | 0    | 0      | A |
| 13 | BICF2P457238    | 18584059 | C | 0    | 0      | A |
| 13 | BICF2P346815    | 18617321 | A | 0.25 | 0.3571 | G |
| 13 | BICF2P180346    | 18625655 | 0 | 0    | 0      | A |
| 13 | BICF2S23131872  | 18636565 | 0 | 0    | 0      | G |
| 13 | BICF2P307408    | 18650571 | G | 0.25 | 0.1429 | C |
| 13 | BICF2P915111    | 18664748 | A | 0.25 | 0.1429 | C |
| 13 | BICF2P499296    | 18694473 | G | 0.5  | 0.5    | A |
| 13 | BICF2P1204033   | 18710127 | A | 0.25 | 0.1429 | G |
| 13 | BICF2P1069978   | 18717836 | A | 0    | 0      | G |
| 13 | BICF2S23130494  | 18732796 | G | 1    | 1      | A |

|    |                         |          |   |      |        |   |
|----|-------------------------|----------|---|------|--------|---|
| 13 | BICF2P396107            | 18739269 | G | 0    | 0      | A |
| 13 | BICF2P556893            | 18766767 | A | 0.5  | 0      | G |
| 13 | BICF2P679956            | 18772740 | G | 0    | 0      | A |
| 13 | BICF2P53570             | 18780043 | A | 0    | 0      | C |
| 13 | BICF2P609661            | 18793283 | A | 0    | 0      | G |
| 13 | BICF2P261248            | 18808381 | G | 0.75 | 0.3571 | A |
| 13 | BICF2P450200            | 18815623 | A | 0    | 0.2857 | G |
| 13 | BICF2P69056             | 18836740 | G | 0    | 0.2857 | A |
| 13 | BICF2P83527             | 18845562 | G | 0.5  | 0.5    | A |
| 13 | BICF2P848521            | 18851825 | G | 0    | 0.2857 | A |
| 13 | BICF2P853971            | 18864071 | A | 0    | 0.2857 | G |
| 13 | BICF2P322024            | 18876653 | 0 | 0    | 0      | A |
| 13 | BICF2P395257            | 18883643 | G | 0.75 | 0.3571 | A |
| 13 | BICF2P1118531           | 18896561 | A | 0.25 | 0.6429 | G |
| 13 | BICF2P1084236           | 18913036 | G | 0.75 | 0.3571 | A |
| 13 | BICF2P928946            | 18919846 | G | 1    | 0.7143 | A |
| 13 | BICF2P350561            | 18932436 | G | 1    | 0.6429 | A |
| 13 | TIGRP2P174420_rs8637308 | 18955358 | 0 | 0    | 0      | G |
| 13 | BICF2S23246911          | 18968333 | A | 0    | 0      | G |
| 13 | BICF2S23621394          | 18976617 | G | 0.25 | 0.4286 | A |
| 13 | BICF2S23219249          | 18987345 | G | 0    | 0      | A |
| 13 | BICF2S23230380          | 19006877 | A | 0.5  | 0.5    | G |
| 13 | BICF2S22932096          | 19012270 | T | 0.25 | 0.1429 | A |
| 13 | BICF2P527059            | 19029069 | 0 | 0    | 0      | G |
| 13 | BICF2S23055854          | 19043322 | A | 0    | 0.6429 | G |
| 13 | BICF2S23256346          | 19059178 | G | 0.25 | 0.6429 | A |
| 13 | BICF2S23752412          | 19070524 | G | 0    | 0      | A |
| 13 | BICF2S23554801          | 19087860 | G | 0    | 0      | A |
| 13 | BICF2S23749132          | 19097141 | A | 0    | 0      | G |
| 13 | BICF2P274129            | 19139368 | A | 0    | 0      | G |
| 13 | BICF2P1320052           | 19151262 | 0 | 0    | 0      | G |
| 13 | BICF2S2332757           | 19161015 | 0 | 0    | 0      | A |
| 13 | G777f43S170             | 19190861 | A | 0    | 0      | T |
| 13 | BICF2S2443419           | 19194684 | A | 0    | 0      | T |
| 13 | BICF2P126305            | 19214438 | A | 0    | 0      | C |
| 13 | BICF2P273547            | 19223333 | A | 0    | 0      | G |
| 13 | BICF2S22913717          | 19237875 | A | 0    | 0      | G |
| 13 | BICF2P1177586           | 19267685 | 0 | 0    | 0      | C |
| 13 | BICF2S23059689          | 19274344 | A | 0    | 0.2857 | G |
| 13 | BICF2S23129016          | 19303382 | A | 0    | 0.2857 | C |
| 13 | BICF2P576358            | 19312371 | A | 0.5  | 0.5    | G |
| 13 | BICF2P207238            | 19326783 | A | 0.25 | 0.1429 | T |
| 13 | BICF2P585538            | 19333729 | A | 0.25 | 0.3571 | G |
| 13 | BICF2P585537            | 19333746 | C | 0.25 | 0.3571 | A |
| 13 | BICF2P1500968           | 19343569 | A | 0    | 0      | G |
| 13 | BICF2P741530            | 19374933 | C | 0    | 0      | A |
| 13 | BICF2P1379336           | 19384104 | G | 0.5  | 0.5    | A |

|    |                         |          |   |      |        |   |
|----|-------------------------|----------|---|------|--------|---|
| 13 | BICF2P506219            | 19391817 | G | 0    | 0      | A |
| 13 | BICF2P1315123           | 19401356 | A | 0    | 0      | G |
| 13 | BICF2P627166            | 19420092 | G | 0.75 | 0.5714 | A |
| 13 | BICF2S23736283          | 19434513 | G | 0.75 | 0.5714 | A |
| 13 | BICF2P496480            | 19439903 | G | 0.75 | 0.5714 | C |
| 13 | BICF2P913233            | 19455021 | G | 0.25 | 0.3571 | A |
| 13 | BICF2P778772            | 19467108 | 0 | 0    | 0      | G |
| 13 | BICF2S24113536          | 19480977 | G | 0.75 | 0.3571 | A |
| 13 | BICF2P1251882           | 19486500 | A | 0    | 0      | G |
| 13 | TIGRP2P174425_rs8616030 | 19500318 | 0 | 0    | 0      | C |
| 13 | BICF2S23911667          | 19509224 | 0 | 0    | 0      | A |
| 13 | BICF2S23230209          | 19518846 | G | 0    | 0      | A |
| 13 | BICF2S23315732          | 19535045 | A | 0    | 0.2857 | G |
| 13 | BICF2S23150337          | 19545796 | 0 | 0    | 0      | C |
| 13 | BICF2S23715908          | 19556533 | A | 0.25 | 0.3571 | G |
| 13 | BICF2P890114            | 19565866 | A | 0.25 | 0.3571 | G |
| 13 | BICF2P175098            | 19571985 | A | 0    | 0      | G |
| 13 | BICF2P1435582           | 19575507 | A | 0.25 | 0.3571 | C |
| 13 | BICF2S23210158          | 19606225 | A | 0    | 0      | G |
| 13 | BICF2P427938            | 19609707 | A | 0.25 | 0.3571 | G |
| 13 | BICF2S23531023          | 19620065 | G | 0    | 0      | A |
| 13 | BICF2S23345034          | 19643114 | G | 0    | 0      | A |
| 13 | BICF2G630610200         | 19654218 | A | 1    | 1      | G |
| 13 | BICF2S23546371          | 19673746 | 0 | 0    | 0      | C |
| 13 | BICF2S23546372          | 19674054 | A | 0.25 | 0.3571 | C |
| 13 | BICF2S23545451          | 19677764 | G | 0    | 0      | A |
| 13 | BICF2G630610240         | 19692694 | A | 0.5  | 0.5    | G |
| 13 | BICF2G630610253         | 19700476 | G | 0.5  | 0.5    | A |
| 13 | BICF2G630610280         | 19711127 | A | 0.5  | 0.5    | G |
| 13 | BICF2G630610289         | 19725707 | A | 0.25 | 0.1429 | G |
| 13 | BICF2G630610292         | 19741416 | A | 0    | 0      | G |
| 13 | BICF2G630610300         | 19748127 | G | 0.25 | 0.1429 | A |
| 13 | BICF2G630610317         | 19761440 | G | 0.75 | 0.5714 | A |
| 13 | BICF2G630610329         | 19779490 | C | 0    | 0      | A |
| 13 | BICF2G630610333         | 19780378 | A | 0.75 | 0.6429 | G |
| 13 | BICF2P398473            | 19799701 | A | 0    | 0      | G |
| 13 | BICF2P18222             | 19813045 | A | 0.25 | 0.1429 | G |
| 13 | BICF2P1069482           | 19824023 | G | 0    | 0      | A |
| 13 | BICF2P1252994           | 19828942 | G | 0.5  | 0.5    | A |
| 13 | BICF2G630610354         | 19848981 | A | 0.25 | 0.6429 | G |
| 13 | BICF2G630610359         | 19853216 | A | 0    | 0.2857 | G |
| 13 | BICF2G630610364         | 19856825 | A | 0    | 0      | G |
| 13 | BICF2G630610381         | 19860629 | G | 0.25 | 0.1429 | A |
| 13 | BICF2S229644            | 19878437 | A | 0.75 | 0.8571 | G |
| 13 | BICF2G630610424         | 19891764 | G | 0.5  | 0.5    | A |
| 13 | BICF2P151837            | 19904793 | A | 0.25 | 0.3571 | G |
| 13 | BICF2G630610441         | 19913472 | C | 0    | 0      | A |

|    |                         |          |   |      |        |   |
|----|-------------------------|----------|---|------|--------|---|
| 13 | BICF2G630610450         | 19918920 | A | 0    | 0      | G |
| 13 | BICF2G630610460         | 19929672 | G | 0    | 0      | A |
| 13 | BICF2G630610477         | 19943254 | A | 0.25 | 0.1429 | G |
| 13 | BICF2G630610500         | 19953027 | G | 0    | 0      | A |
| 13 | BICF2G630610518         | 19969551 | C | 0.25 | 0.4286 | A |
| 13 | BICF2G630610531         | 19983557 | A | 0.25 | 0.6429 | C |
| 13 | BICF2G630610536         | 19987796 | A | 0.25 | 0.3571 | G |
| 13 | BICF2P482834            | 19994508 | A | 0.75 | 0.8571 | G |
| 13 | BICF2G630610553         | 19998930 | A | 0    | 0      | G |
| 13 | BICF2G630610560         | 20000638 | A | 0.25 | 0.6429 | G |
| 13 | BICF2G630610575         | 20009395 | G | 0    | 0.25   | A |
| 13 | BICF2G630610590         | 20015218 | A | 0.25 | 0.3571 | G |
| 13 | BICF2S22955808          | 20022396 | A | 1    | 0.7143 | G |
| 13 | BICF2S22939671          | 20033108 | G | 0    | 0      | A |
| 13 | BICF2G630610623         | 20048615 | A | 0    | 0      | G |
| 13 | BICF2G630610629         | 20058553 | A | 0    | 0      | C |
| 13 | BICF2P703448            | 20078748 | G | 0.75 | 0.5714 | A |
| 13 | BICF2P1359045           | 20083268 | A | 0    | 0.2857 | G |
| 13 | BICF2G630610665         | 20092304 | 0 | 0    | 0      | A |
| 13 | BICF2P691005            | 20110405 | A | 0    | 0      | G |
| 13 | BICF2P273182            | 20117734 | G | 0.5  | 0.5    | A |
| 13 | BICF2P377210            | 20128222 | A | 0.5  | 0.7857 | G |
| 13 | BICF2G630610679         | 20145323 | G | 0.5  | 0.5    | A |
| 13 | BICF2G630610683         | 20148373 | G | 0    | 0      | A |
| 13 | BICF2G630610708         | 20163351 | A | 0    | 0      | G |
| 13 | BICF2G630610720         | 20171291 | A | 0.5  | 0.5    | T |
| 13 | BICF2G630610768         | 20192157 | A | 0.5  | 0.2143 | G |
| 13 | BICF2P224700            | 20206060 | 0 | 0    | 0      | A |
| 13 | BICF2G630610809         | 20221481 | A | 0    | 0.2857 | G |
| 13 | BICF2G630610812         | 20228650 | A | 0    | 0      | G |
| 13 | BICF2P1365514           | 20251246 | A | 0.5  | 0.2143 | G |
| 13 | BICF2P1365515           | 20251329 | A | 0.5  | 0.25   | G |
| 13 | BICF2P565100            | 20260365 | C | 1    | 0.7143 | G |
| 13 | BICF2P243383            | 20262832 | A | 0    | 0      | G |
| 13 | BICF2G630610813         | 20269668 | G | 0.5  | 0.5    | A |
| 13 | BICF2G630610832         | 20279974 | G | 0.5  | 0.5    | A |
| 13 | BICF2P554457            | 20296318 | 0 | 0    | 0      | G |
| 13 | BICF2G630610849         | 20301899 | A | 0    | 0      | G |
| 13 | BICF2G630610856         | 20309614 | A | 0    | 0      | T |
| 13 | BICF2S23251777          | 20320963 | A | 0.5  | 0.25   | G |
| 13 | BICF2G630610897         | 20329366 | T | 0    | 0.2857 | A |
| 13 | TIGRP2P174437_rs8650744 | 20335265 | 0 | 0    | 0      | G |
| 13 | BICF2P1359240           | 20348960 | A | 0    | 0      | G |
| 13 | BICF2G630610951         | 20363145 | T | 0    | 0.2857 | A |
| 13 | BICF2P593689            | 20368945 | G | 0    | 0.2857 | A |
| 13 | BICF2G630610959         | 20378488 | G | 0    | 0.2857 | A |
| 13 | BICF2G630610975         | 20391078 | A | 0    | 0      | G |

|    |                         |          |   |      |        |   |
|----|-------------------------|----------|---|------|--------|---|
| 13 | BICF2G630610992         | 20401311 | A | 0.5  | 0.5    | G |
| 13 | BICF2P1395484           | 20420742 | 0 | 0    | 0      | G |
| 13 | BICF2P827483            | 20432240 | A | 0    | 0      | C |
| 13 | BICF2G630611010         | 20444003 | 0 | 0    | 0      | G |
| 13 | BICF2G630611011         | 20447630 | A | 0    | 0.2857 | G |
| 13 | BICF2G630611029         | 20462315 | G | 0    | 0      | A |
| 13 | BICF2G630611045         | 20470689 | A | 1    | 1      | G |
| 13 | BICF2G630611050         | 20483279 | C | 0    | 0      | A |
| 13 | BICF2G630611062         | 20503588 | G | 0.5  | 0.5    | A |
| 13 | BICF2G630611069         | 20510871 | A | 0.5  | 0.5    | G |
| 13 | BICF2G630611082         | 20516687 | C | 0.5  | 0.5    | A |
| 13 | BICF2G630611091         | 20529588 | A | 0.5  | 0.5    | G |
| 13 | BICF2G630611109         | 20544719 | T | 0    | 0      | A |
| 13 | BICF2G630611119         | 20554900 | A | 0.25 | 0.1429 | G |
| 13 | BICF2G630611127         | 20620567 | T | 0    | 0      | A |
| 13 | BICF2S23351295          | 20635148 | G | 0    | 0      | A |
| 13 | BICF2S22964966          | 20658362 | A | 0    | 0.2857 | G |
| 13 | TIGRP2P174439_rs9084035 | 20681921 | 0 | 0    | 0      | A |
| 13 | BICF2G630611131         | 20695492 | G | 0    | 0.2857 | A |
| 13 | BICF2G630611144         | 20700683 | G | 0    | 0      | A |
| 13 | BICF2P1266698           | 20730558 | 0 | 0    | 0      | C |
| 13 | BICF2G630611147         | 20738953 | G | 0    | 0      | A |
| 13 | BICF2P844990            | 20747865 | 0 | 0    | 0      | A |
| 13 | TIGRP2P174440_rs8766889 | 20767630 | 0 | 0    | 0      | G |
| 13 | BICF2P901437            | 20775311 | 0 | 0    | 0      | G |
| 13 | BICF2S22915548          | 20780848 | T | 0.5  | 0.5    | A |
| 13 | BICF2S23520084          | 20815660 | G | 1    | 0.7143 | A |
| 13 | BICF2P704668            | 20829572 | G | 0.5  | 0.5    | A |
| 13 | BICF2P144958            | 20839511 | 0 | 0    | 0      | G |
| 13 | BICF2G630611151         | 20855959 | A | 0    | 0      | C |
| 13 | BICF2P143191            | 20862993 | 0 | 0    | 0      | C |
| 13 | BICF2G630611162         | 20903036 | A | 0    | 0      | C |
| 13 | BICF2G630611171         | 20912185 | A | 0    | 0      | G |
| 13 | BICF2G630611184         | 20918701 | A | 0    | 0      | G |
| 13 | BICF2G630611196         | 20939967 | C | 0    | 0      | A |
| 13 | BICF2G630611201         | 20948752 | A | 0    | 0      | C |
| 13 | BICF2G630611209         | 20958481 | A | 0    | 0      | T |
| 13 | BICF2G630611231         | 20977731 | G | 0    | 0      | A |
| 13 | BICF2G630611238         | 20990338 | A | 0    | 0.2857 | G |
| 13 | BICF2G630611243         | 21009137 | C | 0    | 0.2857 | A |
| 13 | BICF2G630611254         | 21020433 | A | 0    | 0.25   | G |
| 13 | BICF2G630611260         | 21024629 | G | 0    | 0.2857 | A |
| 13 | BICF2G630611262         | 21025686 | A | 0    | 0.2857 | G |
| 13 | BICF2G630611283         | 21034089 | A | 0    | 0      | C |
| 13 | BICF2P351176            | 21046665 | A | 0    | 0      | G |
| 13 | BICF2P1269511           | 21058930 | A | 0    | 0      | G |
| 13 | BICF2P648415            | 21069059 | A | 0    | 0      | G |

|    |                         |          |   |     |        |   |
|----|-------------------------|----------|---|-----|--------|---|
| 13 | TIGRP2P174442_rs8885629 | 21073466 | 0 | 0   | 0      | G |
| 13 | BICF2G630611294         | 21086465 | C | 0.5 | 0.5    | G |
| 13 | BICF2G630611295         | 21086488 | C | 0.5 | 0.5    | G |
| 13 | BICF2P922758            | 21098347 | G | 0   | 0      | A |
| 13 | BICF2G630611308         | 21103428 | G | 0.5 | 0.5    | A |
| 13 | BICF2G630611327         | 21116818 | C | 0.5 | 0.5    | A |
| 13 | BICF2G630611365         | 21129734 | A | 0.5 | 0.5    | G |
| 13 | BICF2G630611388         | 21147259 | A | 0.5 | 0.5    | C |
| 13 | BICF2P710746            | 21151217 | G | 0   | 0      | C |
| 13 | BICF2G630611412         | 21170459 | A | 0   | 0      | G |
| 13 | BICF2G630611413         | 21171455 | A | 0.5 | 0.7857 | G |
| 13 | BICF2G630611415         | 21175614 | A | 0   | 0      | G |
| 13 | BICF2G630611429         | 21183942 | G | 0.5 | 0.5    | A |
| 13 | BICF2S2318817           | 21196203 | 0 | 0   | 0      | T |
| 13 | BICF2G630611433         | 21209024 | C | 0.5 | 0.2143 | G |
| 13 | BICF2G630611454         | 21235491 | A | 0.5 | 0.5    | T |
| 13 | BICF2G630611474         | 21262596 | A | 0   | 0      | G |
| 13 | BICF2P603082            | 21267883 | G | 0   | 0      | A |
| 13 | BICF2G630611493         | 21277016 | A | 0.5 | 0.7857 | G |
| 13 | BICF2G630611512         | 21291323 | A | 0   | 0.2857 | G |
| 13 | BICF2G630611520         | 21300363 | 0 | 0   | 0      | A |
| 13 | BICF2G630611546         | 21315435 | G | 1   | 1      | C |
| 13 | BICF2G630611562         | 21323793 | A | 0   | 0      | G |
| 13 | BICF2S23627016          | 21333261 | G | 0.5 | 0.5    | A |
| 13 | BICF2G630611570         | 21349013 | A | 0.5 | 0.1667 | C |
| 13 | BICF2G630611599         | 21358202 | C | 0.5 | 0.8333 | A |
| 13 | BICF2G630611610         | 21363293 | G | 0.5 | 0.2143 | A |
| 13 | BICF2G630611616         | 21371599 | A | 0.5 | 0.2143 | G |
| 13 | BICF2G630611629         | 21379696 | A | 0.5 | 0.2143 | C |
| 13 | BICF2G630611642         | 21394112 | 0 | 0   | 0      | G |
| 13 | BICF2G630611681         | 21408285 | 0 | 0   | 0      | G |
| 13 | BICF2G630611709         | 21415002 | 0 | 0   | 0      | G |
| 13 | BICF2G630611730         | 21428820 | A | 0.5 | 0.2143 | G |
| 13 | BICF2G630611739         | 21445990 | A | 0   | 0.2857 | G |
| 13 | BICF2S2323116           | 21468228 | C | 0.5 | 0.7857 | A |
| 13 | BICF2G630611756         | 21480231 | A | 0   | 0      | C |
| 13 | BICF2P188824            | 21485653 | A | 0.5 | 0.5    | T |
| 13 | BICF2G630611781         | 21496018 | C | 0.5 | 0.5    | A |
| 13 | BICF2P823456            | 21512109 | A | 0   | 0      | G |
| 13 | BICF2G630611822         | 21517868 | A | 0   | 0      | G |
| 13 | BICF2G630611833         | 21529064 | A | 0   | 0      | G |
| 13 | BICF2G630611849         | 21544303 | G | 0   | 0      | A |
| 13 | BICF2G630611872         | 21552883 | A | 0   | 0      | G |
| 13 | BICF2P353630            | 21564309 | A | 0.5 | 0.5    | G |
| 13 | BICF2P569328            | 21582897 | 0 | 0   | 0      | A |
| 13 | BICF2G630611906         | 21592894 | 0 | 0   | 0      | A |
| 13 | BICF2G630611925         | 21600902 | A | 0.5 | 0.5    | G |

|    |                         |          |   |     |        |   |
|----|-------------------------|----------|---|-----|--------|---|
| 13 | BICF2G630611940         | 21610806 | C | 0.5 | 0.5    | A |
| 13 | BICF2P918734            | 21623410 | 0 | 0   | 0      | G |
| 13 | BICF2P722085            | 21633777 | 0 | 0   | 0      | G |
| 13 | BICF2G630611947         | 21658633 | G | 0.5 | 0.5    | A |
| 13 | BICF2G630611955         | 21669509 | G | 0.5 | 0.5    | A |
| 13 | BICF2S23724919          | 21682776 | G | 0   | 0      | A |
| 13 | BICF2G630611964         | 21690023 | A | 0.5 | 0.2143 | G |
| 13 | BICF2G630611973         | 21701920 | A | 0.5 | 0.5    | G |
| 13 | BICF2P1124540           | 21720405 | 0 | 0   | 0      | A |
| 13 | BICF2G630611985         | 21731588 | C | 0   | 0      | G |
| 13 | BICF2G630611986         | 21735982 | C | 0   | 0      | A |
| 13 | BICF2G630611996         | 21746782 | A | 0   | 0      | G |
| 13 | BICF2G630612004         | 21761195 | G | 0   | 0      | A |
| 13 | BICF2S23617374          | 21774917 | A | 0   | 0      | G |
| 13 | BICF2G630612008         | 21787930 | G | 0   | 0      | C |
| 13 | BICF2G630612009         | 21793415 | A | 0   | 0      | G |
| 13 | BICF2S23247830          | 21835678 | 0 | 0   | 0      | A |
| 13 | BICF2G630612018         | 21860775 | G | 0.5 | 0.5    | A |
| 13 | BICF2G630612023         | 21865955 | 0 | 0   | 0      | A |
| 13 | BICF2P216637            | 21874537 | A | 0   | 0      | G |
| 13 | BICF2G630612032         | 21888871 | G | 0.5 | 0.5    | A |
| 13 | TIGRP2P174461_rs8766024 | 21900817 | 0 | 0   | 0      | G |
| 13 | BICF2G630612038         | 21918933 | G | 0.5 | 0.5    | A |
| 13 | BICF2P250140            | 21931733 | G | 0.5 | 0.5    | A |
| 13 | BICF2P650729            | 21944848 | A | 0.5 | 0.5    | G |
| 13 | BICF2P875338            | 21948337 | A | 0.5 | 0.5    | G |
| 13 | BICF2P433902            | 21978155 | G | 1   | 1      | A |
| 13 | BICF2P930468            | 21990473 | A | 0   | 0      | G |
| 13 | BICF2P315011            | 22006912 | A | 0.5 | 0.5    | G |
| 13 | BICF2G630612057         | 22012935 | G | 1   | 0.7143 | A |
| 13 | BICF2P249331            | 22033792 | T | 0.5 | 0.2143 | A |
| 13 | BICF2S2304131           | 22051720 | G | 0   | 0      | A |
| 13 | BICF2S23132005          | 22084397 | A | 0   | 0      | G |
| 13 | BICF2P605779            | 22099644 | G | 0   | 0      | A |
| 13 | BICF2P1159074           | 22104302 | A | 0.5 | 0.5    | G |
| 13 | BICF2S22939888          | 22122823 | A | 0   | 0      | G |
| 13 | BICF2P824782            | 22126307 | C | 0   | 0.2857 | G |
| 13 | BICF2G630612150         | 22141614 | G | 1   | 1      | A |
| 13 | BICF2P673369            | 22149713 | G | 0   | 0      | A |
| 13 | BICF2S22917229          | 22161430 | G | 0.5 | 0.2143 | A |
| 13 | BICF2S23652089          | 22178767 | 0 | 0   | 0      | G |
| 13 | BICF2S23652088          | 22178823 | A | 0   | 0      | G |
| 13 | BICF2G630612153         | 22215591 | G | 0   | 0      | C |
| 13 | BICF2G630612158         | 22222851 | A | 0.5 | 0.2143 | G |
| 13 | BICF2G630612189         | 22235859 | G | NA  | 0.1667 | A |
| 13 | BICF2P179778            | 22237963 | C | 0.5 | 0.2143 | G |
| 13 | BICF2G630612204         | 22243767 | A | 0.5 | 0.2143 | G |

|    |                 |          |   |     |        |   |
|----|-----------------|----------|---|-----|--------|---|
| 13 | BICF2G630612205 | 22254964 | A | 0   | 0      | C |
| 13 | BICF2G630612206 | 22268402 | A | 0   | 0.2857 | G |
| 13 | BICF2G630612228 | 22283991 | A | 0.5 | 0.5    | T |
| 13 | BICF2G630612234 | 22287835 | A | 0.5 | 0.5    | G |
| 13 | BICF2P300805    | 22301274 | A | 0.5 | 0.5    | G |
| 13 | BICF2P190854    | 22316554 | 0 | 0   | 0      | A |
| 13 | BICF2S23726680  | 22326464 | G | 0   | 0.2857 | A |
| 13 | BICF2S23243046  | 22335015 | 0 | 0   | 0      | G |
| 13 | BICF2G630612263 | 22349569 | 0 | 0   | 0      | A |
| 13 | BICF2G630612284 | 22360484 | G | 0.5 | 0.2143 | A |
| 13 | BICF2G630612298 | 22370643 | G | 0   | 0      | A |
| 13 | BICF2G630612317 | 22384679 | G | 0   | 0      | A |
| 13 | BICF2G630612329 | 22392251 | A | 0   | 0      | G |
| 13 | BICF2G630612374 | 22405594 | A | 0   | 0      | G |
| 13 | BICF2P124157    | 22419744 | G | 0.5 | 0.1    | A |
| 13 | BICF2G630612396 | 22433373 | A | 0   | 0.2857 | G |
| 13 | BICF2G630612403 | 22444739 | G | 0.5 | 0.2143 | A |
| 13 | BICF2P118144    | 22455824 | G | 0   | 0      | A |
| 13 | BICF2P1012495   | 22467136 | C | 0   | 0.2857 | A |
| 13 | BICF2G630612428 | 22467697 | G | 1   | 0.7143 | A |
| 13 | BICF2G630612478 | 22493428 | A | 0   | 0      | G |
| 13 | BICF2G630612482 | 22501891 | A | 0.5 | 0.2143 | G |
| 13 | BICF2P1023987   | 22510310 | G | 0   | 0      | A |
| 13 | BICF2G630612500 | 22518351 | A | 0.5 | 0.7857 | G |
| 13 | BICF2G630612508 | 22534019 | A | 0   | 0      | C |
| 13 | BICF2G630612519 | 22540553 | A | 0.5 | 0.2143 | C |
| 13 | BICF2G630612544 | 22557228 | G | 0   | 0      | A |
| 13 | BICF2G630612554 | 22570265 | A | 0   | 0      | G |
| 13 | BICF2G630612561 | 22574997 | G | 0   | 0      | A |
| 13 | BICF2G630612583 | 22586357 | A | 0   | 0.2857 | G |
| 13 | BICF2G630612603 | 22605693 | A | 0   | 0      | G |
| 13 | BICF2P951355    | 22626376 | A | 0   | 0      | C |
| 13 | BICF2G630612615 | 22626839 | G | 0.5 | 0.5    | A |
| 13 | BICF2P1313620   | 22640389 | G | 0   | 0.2857 | C |
| 13 | BICF2G630612627 | 22644943 | G | 0.5 | 0.5    | A |
| 13 | BICF2P497447    | 22664633 | A | 0   | 0      | C |
| 13 | BICF2S23259132  | 22666702 | A | 0   | 0.2857 | C |
| 13 | BICF2G630612637 | 22683322 | G | 0   | 0      | A |
| 13 | BICF2G630612645 | 22688041 | A | 0   | 0.2857 | G |
| 13 | BICF2P1052982   | 22691061 | A | 0   | 0.2857 | G |
| 13 | BICF2G630612667 | 22708136 | G | 0   | 0      | A |
| 13 | BICF2G630612690 | 22714370 | A | 0   | 0      | G |
| 13 | BICF2G630612711 | 22731044 | G | 0   | 0      | A |
| 13 | BICF2G630612713 | 22739650 | C | 0   | 0      | A |
| 13 | BICF2S23054517  | 22748362 | C | 0   | 0      | A |
| 13 | BICF2G630612744 | 22765682 | G | 1   | 0.7143 | A |
| 13 | BICF2G630612759 | 22772085 | G | 0   | 0      | A |



|    |                         |          |   |     |        |   |
|----|-------------------------|----------|---|-----|--------|---|
| 13 | BICF2G630612807         | 22792867 | A | 0.5 | 0.2143 | G |
| 13 | BICF2P532039            | 22804395 | A | 0   | 0      | G |
| 13 | BICF2G630612827         | 22807331 | A | 0   | 0      | G |
| 13 | BICF2G630612840         | 22821977 | T | 0   | 0      | A |
| 13 | BICF2G630612848         | 22834937 | G | 0   | 0      | A |
| 13 | BICF2G630612850         | 22839394 | A | 0   | 0      | G |
| 13 | BICF2G630612866         | 22854585 | G | 0   | 0.2857 | A |
| 13 | TIGRP2P174470_rs9054086 | 22866145 | 0 | 0   | 0      | G |
| 13 | BICF2P362172            | 22881338 | A | 0   | 0      | C |
| 13 | BICF2G630612923         | 22892752 | A | 0   | 0      | G |
| 13 | BICF2S23353450          | 22902533 | G | 0   | 0      | A |
| 13 | BICF2G630612931         | 22916452 | G | 0   | 0      | A |
| 13 | BICF2S23121112          | 22937592 | A | 0.5 | 0.2143 | C |
| 13 | BICF2G630612971         | 22944477 | A | 0   | 0      | G |
| 13 | BICF2G630613003         | 22958946 | A | 0   | 0      | C |
| 13 | BICF2G630613004         | 22959881 | A | 0.5 | 0.2143 | G |
| 13 | BICF2G630613015         | 22966236 | G | 0.5 | 0.5    | A |
| 13 | BICF2P1145781           | 22987780 | A | 0   | 0.2857 | G |
| 13 | BICF2S2318454           | 22991514 | A | 0.5 | 0.7857 | G |
| 13 | BICF2P240664            | 23004428 | G | 0.5 | 0.2143 | A |
| 13 | BICF2P525040            | 23022021 | A | 0.5 | 0.2143 | G |
| 13 | BICF2P648379            | 23023126 | G | 0   | 0      | A |
| 13 | BICF2S23444219          | 23039341 | A | 0.5 | 0.2143 | G |
| 13 | BICF2P1434455           | 23047599 | C | 0.5 | 0.1667 | A |
| 13 | BICF2P345543            | 23064990 | 0 | 0   | 0      | G |
| 13 | BICF2P1092492           | 23077277 | A | 0.5 | 0.5    | T |
| 13 | BICF2G630613029         | 23083271 | 0 | 0   | 0      | G |
| 13 | BICF2P1430436           | 23099879 | G | 0   | 0      | A |
| 13 | BICF2G630613069         | 23112844 | A | 0   | 0      | G |
| 13 | BICF2G630613079         | 23117377 | A | 0   | 0      | G |
| 13 | BICF2G630613095         | 23127535 | C | 0.5 | 0.5    | A |
| 13 | BICF2S23314230          | 23139331 | A | 0   | 0      | G |
| 13 | BICF2G630613136         | 23155124 | A | 0   | 0      | G |
| 13 | BICF2G630613174         | 23180227 | A | 0.5 | 0.5    | C |
| 13 | BICF2P426728            | 23189049 | G | 0   | 0      | A |
| 13 | BICF2G630613185         | 23199800 | G | 0   | 0      | A |
| 13 | BICF2G630613189         | 23207208 | A | 0   | 0.2857 | G |
| 13 | BICF2G630613220         | 23222643 | G | 0   | 0.2857 | A |
| 13 | BICF2G630613224         | 23226727 | C | 0.5 | 0.2143 | G |
| 13 | BICF2G630613237         | 23229736 | A | 0.5 | 0.5    | G |
| 13 | BICF2G630613246         | 23235401 | G | 0   | 0      | A |
| 13 | BICF2G630613258         | 23243268 | A | 0   | 0      | G |
| 13 | BICF2G630613264         | 23253081 | A | 0   | 0.2857 | G |
| 13 | BICF2S23036194          | 23273326 | A | 0   | 0      | G |
| 13 | BICF2G630613289         | 23280036 | G | 0   | 0      | A |
| 13 | BICF2G630613309         | 23288808 | A | 0.5 | 0.2143 | C |
| 13 | BICF2P919738            | 23307300 | A | 0   | 0      | G |

|    |                         |          |   |     |        |   |
|----|-------------------------|----------|---|-----|--------|---|
| 13 | BICF2G630613333         | 23309553 | A | 0.5 | 0.5    | T |
| 13 | BICF2G630613336         | 23310527 | A | 0.5 | 0.5    | G |
| 13 | BICF2P157512            | 23335059 | T | 0.5 | 0.5    | A |
| 13 | BICF2G630613406         | 23347050 | A | 1   | 0.7143 | G |
| 13 | BICF2G630613414         | 23359042 | A | 0.5 | 0.5    | G |
| 13 | BICF2G630613421         | 23369395 | A | 0.5 | 0.7857 | G |
| 13 | BICF2P704096            | 23383166 | 0 | 0   | 0      | G |
| 13 | TIGRP2P174484_rs8599758 | 23403586 | 0 | 0   | 0      | G |
| 13 | BICF2P797319            | 23424206 | A | 0   | 0.2857 | G |
| 13 | BICF2P942108            | 23430873 | 0 | 0   | 0      | G |
| 13 | BICF2P1054927           | 23444057 | A | 0   | 0      | G |
| 13 | BICF2G630613435         | 23454048 | 0 | 0   | 0      | G |
| 13 | BICF2G630613447         | 23468605 | A | 0   | 0      | C |
| 13 | BICF2P468535            | 23472088 | 0 | 0   | 0      | G |
| 13 | BICF2G630613461         | 23474680 | A | 0   | 0      | G |
| 13 | BICF2P920416            | 23476966 | A | 0   | 0      | G |
| 13 | BICF2G630613491         | 23487992 | G | 0.5 | 0.1667 | A |
| 13 | BICF2S23713956          | 23506853 | G | 0.5 | 0.2143 | A |
| 13 | BICF2S23157428          | 23522295 | A | 0.5 | 0.5    | G |
| 13 | BICF2G630613555         | 23530710 | A | 0.5 | 0.2143 | G |
| 13 | BICF2G630613573         | 23546872 | A | 0   | 0      | G |
| 13 | BICF2G630613587         | 23554454 | A | 0   | 0      | C |
| 13 | BICF2G630613592         | 23564925 | A | 0.5 | 0.5    | G |
| 13 | BICF2G630613631         | 23583164 | G | 0.5 | 0.7857 | C |
| 13 | BICF2G630613639         | 23587294 | A | 0.5 | 0.7857 | G |
| 13 | BICF2G630613668         | 23601222 | A | 1   | 0.7143 | G |
| 13 | BICF2P388351            | 23611291 | G | 0   | 0.2857 | A |
| 13 | BICF2P772226            | 23623431 | A | 0.5 | 0.7857 | G |
| 13 | BICF2S23117687          | 23643526 | A | 0   | 0      | G |
| 13 | BICF2G630613686         | 23645755 | A | 0.5 | 0.5    | C |
| 13 | BICF2G630613700         | 23656564 | 0 | 0   | 0      | G |
| 13 | BICF2G630613717         | 23668972 | G | 0   | 0      | A |
| 13 | BICF2G630613734         | 23680032 | A | 0   | 0.2857 | G |
| 13 | BICF2G630613749         | 23700368 | C | 0   | 0      | A |
| 13 | BICF2G630613761         | 23706001 | G | 0   | 0      | C |
| 13 | BICF2G630613763         | 23706280 | A | 0   | 0      | T |
| 13 | BICF2S23659924          | 23715468 | A | 0   | 0      | G |
| 13 | BICF2S23657300          | 23730713 | G | 0.5 | 0.5    | A |
| 13 | BICF2G630613794         | 23739360 | A | 0.5 | 0.2143 | T |
| 13 | BICF2G630613797         | 23750516 | A | 0   | 0.2857 | G |
| 13 | BICF2G630613807         | 23764514 | A | 0.5 | 0.5    | C |
| 13 | BICF2G630613812         | 23771542 | A | 0   | 0      | G |
| 13 | BICF2G630613823         | 23789037 | G | 0   | 0      | A |
| 13 | BICF2G630613846         | 23799573 | A | 0.5 | 0.5    | G |
| 13 | BICF2G630613851         | 23806062 | 0 | 0   | 0      | G |
| 13 | BICF2P257816            | 23827729 | 0 | 0   | 0      | G |
| 13 | BICF2G630613852         | 23833687 | 0 | 0   | 0      | G |

|    |                 |          |   |     |        |   |
|----|-----------------|----------|---|-----|--------|---|
| 13 | BICF2S22924915  | 23845380 | A | 0.5 | 0.5    | G |
| 13 | BICF2P492898    | 23852256 | G | 0.5 | 0.5    | A |
| 13 | BICF2P932753    | 23855195 | G | 0.5 | 0.2143 | A |
| 13 | BICF2P932755    | 23855429 | A | 0.5 | 0.2143 | G |
| 13 | BICF2P656947    | 23875332 | A | 0.5 | 0.5    | C |
| 13 | BICF2S2294688   | 23893661 | A | 0.5 | 0.2143 | G |
| 13 | BICF2S2393998   | 23929632 | G | 0   | 0      | A |
| 13 | BICF2S23240444  | 23932746 | A | 0.5 | 0.7857 | G |
| 13 | BICF2S244264    | 23946082 | A | 0   | 0      | G |
| 13 | BICF2P251097    | 23966385 | C | 0.5 | 0.5    | A |
| 13 | BICF2P115217    | 23971099 | A | 0.5 | 0.5    | C |
| 13 | BICF2G630613871 | 23979488 | G | 0.5 | 0.2143 | A |
| 13 | BICF2P5930      | 23997731 | G | 0   | 0      | A |
| 13 | BICF2G630613900 | 24002346 | G | 0.5 | 0.5    | A |
| 13 | BICF2G630613914 | 24012946 | G | 0.5 | 0.5    | A |
| 13 | BICF2P139829    | 24032178 | A | 0   | 0      | C |
| 13 | BICF2P1202222   | 24035518 | C | 0   | 0      | A |
| 13 | BICF2P976002    | 24054567 | G | 0.5 | 0.5    | C |
| 13 | BICF2G630613951 | 24065031 | A | 0.5 | 0.5    | G |
| 13 | BICF2G630613963 | 24069849 | C | 0.5 | 0.5    | A |
| 13 | BICF2G630613973 | 24081275 | A | 0.5 | 0.5    | G |
| 13 | BICF2P299136    | 24099313 | G | 0   | 0      | A |
| 13 | BICF2P1179347   | 24112364 | G | 0.5 | 0.5    | A |
| 13 | BICF2P1253901   | 24118124 | G | 0   | 0      | A |
| 13 | BICF2P1209414   | 24134521 | A | 0   | 0.2    | C |
| 13 | BICF2S22925645  | 24141747 | A | 0   | 0      | G |
| 13 | BICF2P545026    | 24150791 | A | 0   | 0      | C |
| 13 | BICF2P1355985   | 24167569 | A | 0.5 | 0.5    | G |
| 13 | BICF2P1355983   | 24167948 | C | 0   | 0      | A |
| 13 | BICF2S23036062  | 24177097 | A | 0   | 0.2857 | G |
| 13 | BICF2S23115583  | 24192864 | A | 0   | 0      | G |
| 13 | BICF2S23658277  | 24194764 | A | 0.5 | 0.5    | C |
| 13 | BICF2S2347915   | 24200752 | G | 0   | 0.2857 | A |
| 13 | BICF2P1188454   | 24210601 | A | 0   | 0      | G |
| 13 | BICF2P259985    | 24225970 | C | 0   | 0      | A |
| 13 | BICF2P1259600   | 24239199 | G | 0   | 0      | A |
| 13 | BICF2S2346590   | 24248892 | G | 0   | 0      | A |
| 13 | BICF2S23719999  | 24258336 | A | 0   | 0.2857 | G |
| 13 | BICF2P974023    | 24266877 | G | 0.5 | 0.2143 | A |
| 13 | BICF2G630614003 | 24272585 | G | 0   | 0      | A |
| 13 | BICF2G630614004 | 24278279 | A | 0   | 0      | G |
| 13 | BICF2G630614021 | 24286245 | A | 0   | 0.2857 | G |
| 13 | BICF2G630614028 | 24295558 | A | 0   | 0      | G |
| 13 | BICF2G630614032 | 24303336 | G | 0   | 0      | A |
| 13 | BICF2P702513    | 24318022 | A | 0.5 | 0.7857 | C |
| 13 | BICF2G630614053 | 24324297 | A | 0.5 | 0.7857 | G |
| 13 | BICF2G630614063 | 24335426 | A | 0   | 0      | G |

|    |                 |          |   |     |        |   |
|----|-----------------|----------|---|-----|--------|---|
| 13 | BICF2P1115931   | 24356200 | G | 0.5 | 0.7857 | A |
| 13 | BICF2G630614072 | 24363484 | G | 0.5 | 0.2143 | A |
| 13 | BICF2G630614079 | 24369167 | A | 0.5 | 0.2143 | G |
| 13 | BICF2G630614099 | 24380019 | G | 0   | 0      | A |
| 13 | BICF2G630614108 | 24393149 | A | 0.5 | 0.2143 | G |
| 13 | BICF2G630614121 | 24409046 | C | 0   | 0      | A |
| 13 | BICF2G630614135 | 24414650 | A | 0   | 0      | G |
| 13 | BICF2G630614146 | 24425691 | G | 0.5 | 0.2143 | A |
| 13 | BICF2G630614165 | 24433840 | G | 0   | 0      | A |
| 13 | BICF2G630614192 | 24441690 | A | 0.5 | 0.2143 | G |
| 13 | BICF2G630614211 | 24454282 | A | 0   | 0      | T |
| 13 | BICF2G630614225 | 24459598 | G | 0   | 0      | A |
| 13 | BICF2G630614227 | 24460643 | A | 1   | 1      | G |
| 13 | BICF2G630614231 | 24485536 | G | 0   | 0      | A |
| 13 | BICF2G630614261 | 24506154 | G | 0.5 | 0.2143 | A |
| 13 | BICF2P183094    | 24511197 | G | 0   | 0      | A |
| 13 | BICF2S23345340  | 24523360 | G | 0.5 | 0.7857 | A |
| 13 | BICF2G630614296 | 24529607 | C | 0   | 0      | A |
| 13 | BICF2G630614306 | 24543301 | C | 0   | 0      | A |
| 13 | BICF2S23710419  | 24563123 | G | 0.5 | 0.2143 | A |
| 13 | BICF2G630614312 | 24574714 | A | 0   | 0      | G |
| 13 | BICF2P700830    | 24581284 | A | 0.5 | 0.7857 | G |
| 13 | BICF2G630614316 | 24593830 | A | 0.5 | 0.2143 | G |
| 13 | BICF2G630614334 | 24601616 | G | 0   | 0      | A |
| 13 | BICF2P231372    | 24610128 | 0 | 0   | 0      | G |
| 13 | BICF2S23516162  | 24631458 | A | 0   | 0      | G |
| 13 | BICF2G630614359 | 24635727 | C | 0.5 | 0.2143 | A |
| 13 | BICF2S23111129  | 24645346 | A | 0   | 0      | G |
| 13 | BICF2G630614372 | 24657133 | G | 0.5 | 0.2143 | A |
| 13 | BICF2G630614387 | 24668735 | G | 0.5 | 0.2143 | A |
| 13 | BICF2G630614410 | 24685597 | G | 0.5 | 0.2143 | A |
| 13 | BICF2P1231598   | 24699160 | G | 0.5 | 0.7857 | A |
| 13 | BICF2P997148    | 24718428 | G | 0.5 | 0.5    | A |
| 13 | BICF2P631048    | 24733845 | A | 0.5 | 0.5    | G |
| 13 | BICF2P1149249   | 24757101 | A | 0.5 | 0.7857 | G |
| 13 | BICF2P1404531   | 24766508 | A | 0.5 | 0.5    | C |
| 13 | BICF2G630614416 | 24777905 | A | 1   | 0.7143 | C |
| 13 | BICF2P698619    | 24788438 | C | 0   | 0      | A |
| 13 | BICF2G630614418 | 24794972 | 0 | 0   | 0      | A |
| 13 | BICF2S2324706   | 24828133 | 0 | 0   | 0      | C |
| 13 | BICF2S2326094   | 24831851 | A | 0   | 0      | G |
| 13 | BICF2S23256538  | 24844838 | A | 0.5 | 0.7857 | G |
| 13 | BICF2P230727    | 24858741 | C | 0   | 0.2857 | G |
| 13 | BICF2G630614422 | 24871078 | 0 | 0   | 0      | A |
| 13 | BICF2S23620436  | 24879304 | A | 0.5 | 0.2143 | G |
| 13 | BICF2P345231    | 24894311 | A | 0.5 | 0.2143 | G |
| 13 | BICF2S23243733  | 24917997 | G | 0.5 | 0.5    | A |

|    |                         |          |   |     |        |   |
|----|-------------------------|----------|---|-----|--------|---|
| 13 | BICF2S23624143          | 24920731 | G | 0   | 0      | A |
| 13 | BICF2G630614443         | 24934136 | G | 0.5 | 0.2143 | A |
| 13 | BICF2G630614476         | 24947413 | A | 0.5 | 0.2143 | C |
| 13 | BICF2G630614496         | 24956151 | A | 0.5 | 0.2143 | G |
| 13 | BICF2G630614505         | 24968863 | G | 0.5 | 0.2143 | A |
| 13 | BICF2G630614534         | 24994072 | C | 0   | 0      | A |
| 13 | BICF2G630614547         | 24998584 | A | 0.5 | 0.2143 | G |
| 13 | BICF2G630614558         | 25005413 | C | 0   | 0.2857 | G |
| 13 | BICF2G630614565         | 25008775 | G | 0   | 0.2857 | A |
| 13 | BICF2G630614585         | 25013556 | A | 0   | 0      | G |
| 13 | BICF2G630614605         | 25029140 | A | 0   | 0      | G |
| 13 | BICF2G630614606         | 25029779 | A | 0   | 0      | G |
| 13 | BICF2G630614620         | 25034459 | A | 0.5 | 0.5    | G |
| 13 | BICF2G630614627         | 25036340 | A | 0.5 | 0.5    | G |
| 13 | BICF2G630614670         | 25053029 | A | 0   | 0      | G |
| 13 | BICF2G630614691         | 25059538 | A | 0   | 0      | G |
| 13 | BICF2G630614728         | 25071007 | A | 0   | 0      | G |
| 13 | BICF2G630614744         | 25090233 | C | 0.5 | 0.5    | A |
| 13 | BICF2G630614746         | 25096000 | C | 0.5 | 0.2143 | G |
| 13 | BICF2G630614764         | 25125673 | A | 0   | 0      | G |
| 13 | BICF2G630614770         | 25135960 | G | 0.5 | 0.2143 | A |
| 13 | BICF2G630614783         | 25154542 | A | 0   | 0      | G |
| 13 | BICF2S23714554          | 25165808 | G | 0   | 0      | A |
| 13 | BICF2G630614832         | 25186282 | A | 0   | 0      | G |
| 13 | BICF2G630614849         | 25198444 | A | 0.5 | 0.7857 | G |
| 13 | BICF2G630614875         | 25208958 | A | 0.5 | 0.5    | C |
| 13 | BICF2G630614905         | 25220673 | A | 0.5 | 0.7857 | G |
| 13 | BICF2G630614922         | 25231507 | A | 0   | 0.2857 | G |
| 13 | BICF2G630614925         | 25233012 | A | 0   | 0.2857 | C |
| 13 | BICF2G630614944         | 25249849 | A | 1   | 0.7143 | G |
| 13 | BICF2G630614945         | 25254560 | A | 0.5 | 0.2143 | G |
| 13 | BICF2G630614987         | 25269874 | G | 0   | 0.2857 | A |
| 13 | BICF2G630615000         | 25277595 | A | 0   | 0      | C |
| 13 | BICF2G630615044         | 25289212 | G | 0   | 0      | A |
| 13 | BICF2G630615064         | 25301745 | A | 0.5 | 0.2143 | G |
| 13 | BICF2G630615102         | 25324929 | A | 0   | 0      | G |
| 13 | BICF2G630615121         | 25343441 | A | 0   | 0      | G |
| 13 | TIGRP2P174503_rs9151817 | 25358958 | 0 | 0   | 0      | G |
| 13 | BICF2S23250133          | 25378959 | A | 0   | 0      | G |
| 13 | BICF2P763706            | 25391642 | 0 | 0   | 0      | G |
| 13 | BICF2S22911889          | 25410671 | G | 0   | 0      | C |
| 13 | BICF2P227428            | 25416407 | A | 0   | 0.2857 | G |
| 13 | BICF2G630615155         | 25419951 | G | 0   | 0.2857 | A |
| 13 | BICF2G630615170         | 25428455 | G | 0   | 0      | A |
| 13 | BICF2G630615186         | 25441325 | A | 0   | 0      | G |
| 13 | BICF2S2448882           | 25457547 | A | 0   | 0      | C |
| 13 | BICF2G630615207         | 25470547 | G | 0   | 0      | A |

|    |                 |          |   |     |        |   |
|----|-----------------|----------|---|-----|--------|---|
| 13 | BICF2P129093    | 25477618 | 0 | 0   | 0      | A |
| 13 | BICF2G630615212 | 25497611 | A | 0   | 0      | G |
| 13 | BICF2S22928267  | 25522982 | G | 0   | 0      | A |
| 13 | BICF2G630615221 | 25531993 | A | 0.5 | 0.5    | G |
| 13 | BICF2S23442124  | 25543285 | A | 0.5 | 0.5    | G |
| 13 | BICF2G630615250 | 25564467 | A | 0.5 | 0.5    | C |
| 13 | BICF2G630615252 | 25566955 | A | 0.5 | 0.5    | G |
| 13 | BICF2G630615262 | 25581981 | A | 0.5 | 0.5    | G |
| 13 | BICF2G630615279 | 25597672 | A | 0.5 | 0.5    | C |
| 13 | BICF2G630615298 | 25613978 | C | 0   | 0      | A |
| 13 | BICF2G630615320 | 25622993 | A | 0   | 0      | G |
| 13 | BICF2G630615344 | 25633933 | A | 0.5 | 0.5    | G |
| 13 | BICF2G630615376 | 25654506 | G | 0.5 | 0.5    | A |
| 13 | BICF2G630615390 | 25659960 | A | 0   | 0      | G |
| 13 | BICF2G630615411 | 25674079 | A | 0   | 0      | G |
| 13 | BICF2G630615416 | 25680506 | C | 0   | 0      | A |
| 13 | BICF2G630615434 | 25691106 | A | 0   | 0      | G |
| 13 | BICF2G630615451 | 25701164 | A | 0   | 0.2857 | G |
| 13 | BICF2G630615463 | 25705558 | A | 1   | 0.7143 | G |
| 13 | BICF2S2317998   | 25715700 | A | 0.5 | 0.2143 | G |
| 13 | BICF2G630615487 | 25731744 | G | 0   | 0      | A |
| 13 | BICF2G630615506 | 25740030 | C | 0   | 0      | A |
| 13 | BICF2G630615520 | 25750507 | A | 0   | 0      | G |
| 13 | BICF2G630615547 | 25764429 | A | 0   | 0      | C |
| 13 | BICF2S23543403  | 25798926 | C | 0.5 | 0.5    | A |
| 13 | BICF2S23654058  | 25820335 | G | 0   | 0.2857 | A |
| 13 | BICF2P140059    | 25843825 | 0 | 0   | 0      | G |
| 13 | BICF2P454243    | 25860295 | A | 0   | 0      | G |
| 13 | BICF2P527892    | 25874529 | 0 | 0   | 0      | C |
| 13 | BICF2S22928705  | 25875822 | G | 0.5 | 0.5    | A |
| 13 | BICF2S22929120  | 25893472 | A | 0.5 | 0.7857 | G |
| 13 | BICF2G630615593 | 25906886 | A | 0   | 0      | G |
| 13 | BICF2G630615604 | 25915740 | G | 0.5 | 0.5    | A |
| 13 | BICF2G630615623 | 25924408 | A | 0.5 | 0.2143 | G |
| 13 | BICF2G630615630 | 25939284 | G | 0   | 0      | A |
| 13 | BICF2G630615640 | 25944543 | A | 0.5 | 0.5    | C |
| 13 | BICF2G630615656 | 25964826 | G | 0.5 | 0.2143 | A |
| 13 | BICF2S2309128   | 25974300 | 0 | 0   | 0      | T |
| 13 | BICF2P898358    | 25986381 | G | 0.5 | 0.5    | A |
| 13 | BICF2G630615675 | 25990983 | A | 0.5 | 0.2143 | G |
| 13 | BICF2G630615686 | 26002382 | G | 0.5 | 0.2143 | A |
| 13 | BICF2G630615709 | 26022133 | G | 0.5 | 0.1667 | A |
| 13 | BICF2G630615710 | 26022828 | A | 0.5 | 0.2143 | G |
| 13 | BICF2G630615715 | 26031870 | A | 0   | 0      | G |
| 13 | BICF2G630615722 | 26042607 | G | 0.5 | 0.5    | A |
| 13 | BICF2P1416007   | 26059954 | A | 0   | 0      | G |
| 13 | BICF2G630615746 | 26061087 | A | 1   | 1      | G |

|    |                 |          |   |     |        |   |
|----|-----------------|----------|---|-----|--------|---|
| 13 | BICF2G630615774 | 26089097 | A | 0.5 | 0.5    | G |
| 13 | BICF2G630615796 | 26102639 | A | 0.5 | 0.5    | G |
| 13 | BICF2P644878    | 26126278 | 0 | 0   | 0      | A |
| 13 | BICF2P1469927   | 26137933 | 0 | 0   | 0      | C |
| 13 | BICF2G630615815 | 26146231 | A | 0.5 | 0.5    | G |
| 13 | BICF2G630615822 | 26151369 | A | 1   | 0.7143 | G |
| 13 | BICF2S23336082  | 26165209 | A | 0.5 | 0.2143 | G |
| 13 | BICF2P469248    | 26181282 | A | 0   | 0      | G |
| 13 | BICF2P504931    | 26191381 | 0 | 0   | 0      | A |
| 13 | BICF2S23539097  | 26202515 | G | 0.5 | 0.5    | A |
| 13 | BICF2G630615845 | 26230670 | A | 0   | 0      | G |
| 13 | BICF2G630615846 | 26231625 | G | 0.5 | 0.5    | A |
| 13 | BICF2P1506764   | 26247013 | A | 0   | 0      | G |
| 13 | BICF2G630615865 | 26256881 | G | 0   | 0      | A |
| 13 | BICF2G630615879 | 26266454 | A | 0   | 0      | C |
| 13 | BICF2P1275283   | 26278054 | G | 0.5 | 0.2143 | A |
| 13 | BICF2G630615889 | 26294158 | A | 0   | 0      | G |
| 13 | BICF2G630615901 | 26301402 | C | 0   | 0      | A |
| 13 | BICF2G630615912 | 26315885 | A | 0   | 0      | T |
| 13 | BICF2G630615922 | 26319007 | G | 0   | 0      | A |
| 13 | BICF2G630615929 | 26323479 | G | 0   | 0      | A |
| 13 | BICF2G630615936 | 26330877 | A | 0   | 0      | G |
| 13 | BICF2G630615942 | 26337339 | G | 0.5 | 0.7857 | A |
| 13 | BICF2G630615966 | 26351000 | A | 0   | 0      | G |
| 13 | BICF2S23039693  | 26352325 | G | 0.5 | 0.2143 | A |
| 13 | BICF2S23227687  | 26364342 | A | 0.5 | 0.2143 | G |
| 13 | BICF2G630616004 | 26379341 | A | 0   | 0      | G |
| 13 | BICF2G630616021 | 26397269 | A | 0   | 0      | G |
| 13 | BICF2G630616027 | 26407673 | G | 0.5 | 0.2143 | A |
| 13 | BICF2P1434110   | 26417251 | G | 1   | 0.7143 | A |
| 13 | BICF2S22918116  | 26430585 | A | 0.5 | 0.5    | C |
| 13 | BICF2P1318675   | 26440885 | C | 0   | 0.2857 | G |
| 13 | BICF2P631138    | 26460553 | A | 0   | 0      | G |
| 13 | BICF2G630616071 | 26470743 | C | 0   | 0      | A |
| 13 | BICF2S23534972  | 26479266 | A | 0   | 0      | C |
| 13 | BICF2G630616079 | 26485563 | G | 0   | 0      | A |
| 13 | BICF2G630616099 | 26506017 | G | 0   | 0      | A |
| 13 | BICF2G630616101 | 26509434 | A | 0   | 0      | G |
| 13 | BICF2G630616120 | 26527418 | A | 0   | 0      | G |
| 13 | BICF2G630616131 | 26532326 | G | 1   | 0.7143 | A |
| 13 | BICF2P1371406   | 26546518 | 0 | 0   | 0      | G |
| 13 | BICF2P438675    | 26556929 | A | 0   | 0      | C |
| 13 | BICF2G630616160 | 26569595 | G | 0   | 0      | A |
| 13 | BICF2G630616162 | 26584733 | G | 0   | 0      | A |
| 13 | BICF2G630616199 | 26596943 | A | 0   | 0      | G |
| 13 | BICF2G630616201 | 26600552 | A | 1   | 0.7143 | C |
| 13 | BICF2P1224625   | 26621147 | A | 0   | 0      | C |

|    |                         |          |   |     |        |   |
|----|-------------------------|----------|---|-----|--------|---|
| 13 | BICF2G630616234         | 26623710 | A | 0   | 0.2857 | G |
| 13 | BICF2G630616243         | 26653152 | A | 0   | 0      | T |
| 13 | BICF2G630616257         | 26657485 | A | 0   | 0      | G |
| 13 | BICF2G630616268         | 26669790 | A | 0   | 0      | G |
| 13 | BICF2S2373761           | 26686582 | C | 0   | 0      | A |
| 13 | BICF2S23139708          | 26700745 | C | 0   | 0.2857 | G |
| 13 | BICF2G630616285         | 26708913 | A | 0   | 0      | T |
| 13 | BICF2P1207814           | 26717374 | G | 0   | 0      | A |
| 13 | BICF2G630616306         | 26731749 | G | 0   | 0      | A |
| 13 | BICF2G630616325         | 26742935 | A | 0   | 0      | G |
| 13 | BICF2G630616358         | 26758659 | G | 0   | 0      | A |
| 13 | TIGRP2P174517_rs9048992 | 26762796 | 0 | 0   | 0      | G |
| 13 | BICF2S23450127          | 26779281 | G | 0   | 0.2857 | A |
| 13 | BICF2G630616395         | 26783892 | G | 0   | 0      | A |
| 13 | BICF2P790332            | 26801998 | G | 0.5 | 0.2143 | A |
| 13 | BICF2P1428283           | 26807341 | A | 0.5 | 0.2143 | G |
| 13 | BICF2P474021            | 26828478 | G | 0.5 | 0.2143 | A |
| 13 | BICF2S23260848          | 26837055 | G | 0.5 | 0.2143 | A |
| 13 | BICF2S23631203          | 26841309 | A | 0.5 | 0.2143 | G |
| 13 | BICF2S23157464          | 26854125 | A | 0.5 | 0.2143 | G |
| 13 | BICF2S23340302          | 26868889 | G | 0.5 | 0.2143 | A |
| 13 | BICF2G630616421         | 26896592 | A | 0   | 0      | G |
| 13 | BICF2G630616422         | 26903052 | G | 0   | 0      | A |
| 13 | BICF2G630616424         | 26911739 | A | 0   | 0      | G |
| 13 | BICF2G630616434         | 26922036 | A | 0   | 0      | G |
| 13 | BICF2P287849            | 26934504 | G | 0   | 0      | A |
| 13 | BICF2G630616465         | 26951845 | C | 0   | 0      | A |
| 13 | BICF2G630616472         | 26959221 | G | 0   | 0      | A |
| 13 | BICF2S23720960          | 26979577 | A | 0   | 0      | G |
| 13 | BICF2G630616486         | 27000044 | C | 0.5 | 0.2143 | A |
| 13 | BICF2P102491            | 27004521 | A | 1   | 1      | G |
| 13 | BICF2P1078108           | 27014183 | A | 0   | 0      | G |
| 13 | BICF2P844798            | 27026973 | A | 0   | 0.2857 | G |
| 13 | BICF2P16542             | 27065279 | 0 | 0   | 0      | C |
| 13 | BICF2P265320            | 27079420 | A | 1   | 0.7143 | G |
| 13 | BICF2G630616502         | 27090843 | A | 1   | 0.7143 | G |
| 13 | BICF2G630616510         | 27094574 | A | 1   | 0.7143 | G |
| 13 | BICF2G630616516         | 27097125 | G | 1   | 0.7143 | A |
| 13 | BICF2G630616530         | 27113882 | G | 1   | 0.7143 | A |
| 13 | BICF2G630616540         | 27120636 | A | 1   | 0.7143 | G |
| 13 | BICF2G630616547         | 27137121 | G | 0.5 | 0.2143 | A |
| 13 | TIGRP2P174522_rs8713397 | 27141374 | 0 | 0   | 0      | A |
| 13 | BICF2G630616563         | 27152646 | G | 0   | 0      | A |
| 13 | BICF2G630616577         | 27158955 | A | 0   | 0      | G |
| 13 | BICF2G630616583         | 27159342 | A | 0   | 0      | G |
| 13 | BICF2S23129171          | 27165724 | A | 0   | 0.2857 | G |
| 13 | BICF2P334623            | 27182215 | A | 0.5 | 0.5    | G |



|    |                 |          |   |     |        |   |
|----|-----------------|----------|---|-----|--------|---|
| 13 | BICF2P915421    | 27190475 | A | 0   | 0      | G |
| 13 | BICF2G630616592 | 27205103 | A | 0   | 0.2857 | G |
| 13 | BICF2G630616598 | 27209027 | A | 0   | 0      | C |
| 13 | BICF2G630616615 | 27227623 | G | 0   | 0.2857 | A |
| 13 | BICF2S23618778  | 27233316 | A | 0   | 0      | G |
| 13 | BICF2P19680     | 27246752 | 0 | 0   | 0      | G |
| 13 | BICF2G630616622 | 27260533 | A | 0   | 0.2857 | G |
| 13 | BICF2G630616642 | 27269237 | A | 0   | 0.2857 | G |
| 13 | BICF2G630616660 | 27281292 | A | 0.5 | 0.7857 | G |
| 13 | BICF2S23145005  | 27294613 | G | 1   | 0.7143 | A |
| 13 | BICF2S23259014  | 27318760 | A | 0   | 0      | G |
| 13 | BICF2G630616673 | 27342825 | A | 0   | 0      | C |
| 13 | BICF2G630616688 | 27351560 | G | 0   | 0      | A |
| 13 | BICF2G630616697 | 27360384 | A | 0.5 | 0.2143 | G |
| 13 | BICF2G630616702 | 27371905 | A | 0   | 0      | G |
| 13 | BICF2P1298613   | 27383736 | A | 0.5 | 0.2143 | G |
| 13 | BICF2P262498    | 27392532 | A | 0.5 | 0.2143 | G |
| 13 | BICF2P612593    | 27397292 | 0 | 0   | 0      | A |
| 13 | BICF2P360830    | 27404911 | G | 0.5 | 0.2143 | A |
| 13 | BICF2G630616710 | 27418698 | A | 0   | 0      | G |
| 13 | BICF2P1278289   | 27433863 | A | 0.5 | 0.2143 | G |
| 13 | BICF2P565928    | 27440062 | G | 0.5 | 0.2143 | A |
| 13 | BICF2P1417679   | 27453462 | C | 1   | 0.75   | A |
| 13 | BICF2G630616713 | 27470034 | G | 0   | 0      | A |
| 13 | BICF2S2348813   | 27473947 | G | 0   | 0      | A |
| 13 | BICF2G630616730 | 27489928 | A | 0   | 0      | G |
| 13 | BICF2G630616740 | 27505380 | A | 1   | 1      | G |
| 13 | BICF2G630616742 | 27509632 | G | 0   | 0      | A |
| 13 | BICF2G630616746 | 27522299 | A | 0   | 0      | G |
| 13 | BICF2G630616769 | 27541599 | C | 1   | 1      | A |
| 13 | BICF2G630616774 | 27543706 | A | 0   | 0      | G |
| 13 | BICF2G630616786 | 27558889 | A | 0   | 0      | G |
| 13 | BICF2G630616789 | 27575055 | A | 0   | 0.2857 | G |
| 13 | BICF2G630616800 | 27579271 | A | 0   | 0      | G |
| 13 | BICF2G630616805 | 27599073 | A | 0   | 0      | G |
| 13 | BICF2P949802    | 27608956 | 0 | 0   | 0      | A |
| 13 | BICF2G630616806 | 27613738 | C | 0   | 0      | A |
| 13 | BICF2G630616818 | 27623769 | C | 0   | 0      | A |
| 13 | BICF2P773144    | 27645931 | A | 0   | 0      | G |
| 13 | BICF2P1396319   | 27663429 | A | 0   | 0      | G |
| 13 | BICF2G630616844 | 27672147 | A | 0   | 0      | C |
| 13 | BICF2G630616847 | 27686410 | A | 0   | 0      | G |
| 13 | BICF2G630616867 | 27701447 | C | 0   | 0      | A |
| 13 | BICF2G630616878 | 27710747 | A | 0   | 0      | G |
| 13 | BICF2G630616907 | 27722729 | A | 0.5 | 0.7857 | G |
| 13 | BICF2G630616914 | 27731984 | G | 0   | 0      | A |
| 13 | BICF2S23212644  | 27749393 | G | 0.5 | 0.5    | A |

|    |                         |          |   |     |        |   |
|----|-------------------------|----------|---|-----|--------|---|
| 13 | BICF2G630616933         | 27752446 | A | 0   | 0.2857 | G |
| 13 | BICF2G630616957         | 27764299 | G | 0.5 | 0.7857 | A |
| 13 | BICF2G630616971         | 27776372 | A | 0.5 | 0.5    | G |
| 13 | BICF2G630617004         | 27801151 | G | 0   | 0      | A |
| 13 | BICF2G630617014         | 27807592 | A | 0.5 | 0.5    | C |
| 13 | BICF2G630617037         | 27822412 | A | 0   | 0      | G |
| 13 | BICF2G630617043         | 27831739 | G | 1   | 1      | A |
| 13 | BICF2G630617067         | 27841901 | A | 0   | 0      | G |
| 13 | BICF2P988582            | 27856384 | G | 0.5 | 0.2143 | A |
| 13 | BICF2G630617082         | 27864633 | C | 0.5 | 0.5    | A |
| 13 | BICF2G630617102         | 27879107 | A | 0   | 0      | G |
| 13 | BICF2G630617121         | 27892373 | A | 0   | 0      | G |
| 13 | BICF2G630617126         | 27899721 | G | 0   | 0.2857 | A |
| 13 | BICF2P449473            | 27913803 | A | 0   | 0      | C |
| 13 | BICF2S23151194          | 27922577 | A | 0.5 | 0.2143 | G |
| 13 | TIGRP2P174526_rs8682962 | 27956630 | 0 | 0   | 0      | A |
| 13 | BICF2G630617152         | 27968255 | T | 0   | 0      | A |
| 13 | BICF2P924973            | 27988085 | 0 | 0   | 0      | A |
| 13 | BICF2P1342663           | 28001468 | A | 0.5 | 0.7857 | G |
| 13 | BICF2G630617157         | 28006015 | A | 0   | 0      | G |
| 13 | BICF2G630617162         | 28018160 | 0 | 0   | 0      | A |
| 13 | BICF2G630617170         | 28029935 | G | 0   | 0      | A |
| 13 | BICF2P1205132           | 28030395 | 0 | 0   | 0      | A |
| 13 | BICF2G630617177         | 28033662 | 0 | 0   | 0      | C |
| 13 | BICF2G630617188         | 28045668 | A | 0   | 0      | G |
| 13 | BICF2G630617207         | 28047934 | G | 0   | 0      | A |
| 13 | BICF2G630617215         | 28048619 | A | 0   | 0      | G |
| 13 | BICF2G630617245         | 28076481 | A | 0   | 0      | G |
| 13 | BICF2G630617251         | 28091596 | 0 | 0   | 0      | G |
| 13 | BICF2G630617258         | 28103948 | A | 0   | 0      | C |
| 13 | BICF2P898929            | 28110441 | A | 0   | 0      | G |
| 13 | BICF2G630617264         | 28133854 | A | 0   | 0      | G |
| 13 | BICF2P105843            | 28148379 | C | 0.5 | 0.2143 | A |
| 13 | BICF2S23029185          | 28162597 | A | 0.5 | 0.7857 | G |
| 13 | BICF2S23033902          | 28166664 | A | 0.5 | 0.2143 | G |
| 13 | BICF2S23029487          | 28178693 | A | 0   | 0      | G |
| 13 | BICF2P166682            | 28204495 | A | 1   | 1      | G |
| 13 | BICF2P726805            | 28208279 | A | 0   | 0      | G |
| 13 | BICF2G630617270         | 28210311 | G | 0   | 0      | A |
| 13 | BICF2G630617282         | 28230429 | A | 0.5 | 0.5    | C |
| 13 | BICF2G630617285         | 28233305 | A | 0   | 0      | G |
| 13 | BICF2G630617296         | 28245780 | A | 0.5 | 0.5    | C |
| 13 | BICF2G630617306         | 28255693 | A | 0   | 0      | G |
| 13 | BICF2G630617319         | 28273467 | A | 0.5 | 0.5    | C |
| 13 | BICF2G630617323         | 28279396 | A | 0   | 0      | G |
| 13 | BICF2P564681            | 28291984 | A | 0   | 0      | G |
| 13 | BICF2S23051140          | 28301987 | G | 0   | 0      | A |

|    |                         |          |   |     |        |   |
|----|-------------------------|----------|---|-----|--------|---|
| 13 | BICF2P1458071           | 28316062 | 0 | 0   | 0      | A |
| 13 | BICF2G630617344         | 28324572 | A | 0   | 0      | G |
| 13 | BICF2G630617348         | 28337118 | A | 0.5 | 0.2143 | G |
| 13 | BICF2G630617377         | 28360294 | G | 0   | 0      | A |
| 13 | BICF2G630617391         | 28379210 | G | 0.5 | 0.2143 | A |
| 13 | BICF2G630617394         | 28383512 | G | 1   | 1      | A |
| 13 | BICF2P928845            | 28404340 | A | 0   | 0      | G |
| 13 | BICF2P504166            | 28410252 | G | 0.5 | 0.2143 | A |
| 13 | BICF2P300209            | 28423773 | A | 0   | 0      | G |
| 13 | BICF2P1282193           | 28431021 | 0 | 0   | 0      | G |
| 13 | TIGRP2P174531_rs9023113 | 28445035 | 0 | 0   | 0      | A |
| 13 | BICF2P539993            | 28460402 | G | 0.5 | 0.5    | C |
| 13 | BICF2P539992            | 28460490 | G | 0.5 | 0.5    | A |
| 13 | BICF2P539986            | 28460869 | T | 0.5 | 0.5    | A |
| 13 | BICF2G630617417         | 28467529 | A | 0   | 0.2    | G |
| 13 | BICF2P871887            | 28474850 | G | 0.5 | 0.5    | A |
| 13 | BICF2P17941             | 28491108 | G | 0.5 | 0.2143 | C |
| 13 | BICF2P1258740           | 28497528 | G | 0   | 0      | A |
| 13 | BICF2G630617430         | 28512533 | G | 0.5 | 0.2143 | A |
| 13 | BICF2S22922677          | 28539727 | G | 0.5 | 0.2143 | A |
| 13 | BICF2S22927798          | 28544020 | A | 0   | 0      | G |
| 13 | BICF2S2332280           | 28556714 | G | 0   | 0      | A |
| 13 | BICF2G630617441         | 28567941 | A | 0   | 0.2857 | G |
| 13 | G779f35S83              | 28588428 | A | 0   | 0      | G |
| 13 | TIGRP2P174532_rs9083243 | 28595921 | 0 | 0   | 0      | A |
| 13 | BICF2S23648815          | 28611224 | G | 0   | 0      | A |
| 13 | BICF2P1415651           | 28619636 | G | 0   | 0.2857 | A |
| 13 | BICF2P1133123           | 28623847 | A | 0   | 0.2857 | C |
| 13 | BICF2G630617453         | 28668400 | G | 0.5 | 0.5    | A |
| 13 | BICF2G630617454         | 28671394 | G | 0.5 | 0.5    | A |
| 13 | BICF2P1120423           | 28675649 | T | 0   | 0.2857 | A |
| 13 | BICF2G630617457         | 28689330 | A | 0   | 0      | G |
| 13 | BICF2S23542932          | 28712411 | C | 0   | 0      | G |
| 13 | BICF2G630617478         | 28717015 | T | 0   | 0      | A |
| 13 | BICF2G630617488         | 28728032 | A | 0   | 0.2857 | G |
| 13 | BICF2G630617496         | 28748263 | C | 0   | 0.2857 | A |
| 13 | BICF2S2336017           | 28752034 | G | 1   | 0.7143 | A |
| 13 | BICF2G630617516         | 28762194 | A | 0   | 0.2857 | G |
| 13 | BICF2G630617533         | 28775680 | G | 0   | 0.2857 | A |
| 13 | BICF2G630617535         | 28786140 | A | 0   | 0.2857 | C |
| 13 | BICF2P864645            | 28808894 | G | 0   | 0      | A |
| 13 | BICF2P841449            | 28824892 | A | 0   | 0      | G |
| 13 | BICF2P942548            | 28838183 | G | 0   | 0      | C |
| 13 | BICF2P460279            | 28847214 | G | 0   | 0      | A |
| 13 | BICF2P513813            | 28858637 | G | 0   | 0      | A |
| 13 | BICF2P1292716           | 28866815 | A | 0   | 0      | G |
| 13 | BICF2P318652            | 28879708 | A | 0   | 0      | T |

|    |                         |          |   |     |        |   |
|----|-------------------------|----------|---|-----|--------|---|
| 13 | BICF2G630617550         | 28892953 | A | 1   | 0.7143 | T |
| 13 | BICF2S236936            | 28907475 | 0 | 0   | 0      | G |
| 13 | BICF2S23624844          | 28914409 | 0 | 0   | 0      | G |
| 13 | BICF2G630617579         | 28928605 | G | 0   | 0.2857 | A |
| 13 | BICF2S23542607          | 28946535 | G | 0   | 0      | A |
| 13 | TIGRP2P174536_rs9119936 | 28975711 | 0 | 0   | 0      | A |
| 13 | BICF2G630617580         | 28992435 | A | 1   | 0.6667 | T |
| 13 | BICF2P1197081           | 29012602 | 0 | 0   | 0      | C |
| 13 | TIGRP2P174537_rs8935986 | 29016068 | 0 | 0   | 0      | C |
| 13 | BICF2G630617583         | 29033271 | A | 0   | 0      | G |
| 13 | BICF2S23610364          | 29038597 | G | 0   | 0      | A |
| 13 | BICF2S23524284          | 29062901 | 0 | 0   | 0      | A |
| 13 | BICF2P1258944           | 29084575 | 0 | 0   | 0      | C |
| 13 | BICF2G630617589         | 29116209 | 0 | 0   | 0      | G |
| 13 | BICF2P492152            | 29118911 | A | 0   | 0      | G |
| 13 | BICF2P1438401           | 29157652 | 0 | 0   | 0      | A |
| 13 | BICF2G630617591         | 29181680 | G | 0.5 | 0.7857 | A |
| 13 | BICF2S2332496           | 29189548 | G | 0.5 | 0.7857 | A |
| 13 | BICF2P645412            | 29199455 | 0 | 0   | 0      | C |
| 13 | BICF2P869867            | 29216469 | A | 0   | 0      | G |
| 13 | BICF2S2332598           | 29224454 | G | 0   | 0      | A |
| 13 | BICF2G630617594         | 29233318 | G | 0.5 | 0.2143 | A |
| 13 | BICF2P1394049           | 29246279 | G | 0   | 0      | A |
| 13 | BICF2G630617607         | 29267079 | A | 0.5 | 0.2143 | G |
| 13 | BICF2G630617646         | 29285137 | A | 0.5 | 0.7857 | G |
| 13 | BICF2G630617662         | 29298418 | G | 0.5 | 0.1667 | A |
| 13 | BICF2G630617688         | 29312301 | A | 0.5 | 0.2143 | G |
| 13 | BICF2P647598            | 29320668 | A | 0.5 | 0.2143 | G |
| 13 | BICF2G630617705         | 29327568 | C | 0.5 | 0.2143 | A |
| 13 | BICF2G630617708         | 29353608 | A | 0.5 | 0.7857 | G |
| 13 | BICF2P593161            | 29367722 | 0 | 0   | 0      | A |
| 13 | BICF2G630617718         | 29380216 | A | 0.5 | 0.2143 | T |
| 13 | BICF2G630617733         | 29391604 | A | 0.5 | 0.7857 | G |
| 13 | BICF2G630617741         | 29403043 | C | 0   | 0.2857 | A |
| 13 | BICF2P978920            | 29412347 | 0 | 0   | 0      | C |
| 13 | BICF2S22949846          | 29454952 | A | 0   | 0.2857 | G |
| 13 | BICF2G630617745         | 29463660 | G | 0   | 0      | A |
| 13 | BICF2G630617748         | 29477724 | C | 0.5 | 0.2143 | A |
| 13 | BICF2G630617757         | 29506356 | A | 0   | 0      | G |
| 13 | BICF2G630617761         | 29509757 | G | 0   | 0      | A |
| 13 | BICF2P343725            | 29536625 | A | 0   | 0      | G |
| 13 | BICF2G630617784         | 29543774 | A | 0   | 0      | T |
| 13 | BICF2P104086            | 29562879 | 0 | 0   | 0      | A |
| 13 | BICF2P450349            | 29576890 | A | 0   | 0      | G |
| 13 | BICF2P323658            | 29580501 | 0 | 0   | 0      | A |
| 13 | G781f43S142             | 29604221 | 0 | 0   | 0      | C |
| 13 | BICF2S24317234          | 29629329 | C | 0.5 | 0.5    | A |

|    |                         |          |   |     |        |   |
|----|-------------------------|----------|---|-----|--------|---|
| 13 | BICF2P1217348           | 29663362 | 0 | 0   | 0      | G |
| 13 | BICF2P349782            | 29678678 | 0 | 0   | 0      | G |
| 13 | BICF2P1377548           | 29721185 | A | 0   | 0.2857 | G |
| 13 | BICF2P1013261           | 29730125 | A | 0   | 0.2857 | G |
| 13 | BICF2P767342            | 29745709 | A | 0   | 0.2857 | G |
| 13 | BICF2P585151            | 29761306 | 0 | 0   | 0      | G |
| 13 | G782f50S151             | 29785418 | G | 0   | 0      | A |
| 13 | BICF2S23520159          | 29805477 | A | 0.5 | 0.5    | G |
| 13 | BICF2G630617790         | 29844662 | G | 0   | 0      | A |
| 13 | BICF2G630617812         | 29857339 | G | 0.5 | 0.7857 | A |
| 13 | BICF2P1265977           | 29870739 | A | 0   | 0      | G |
| 13 | BICF2G630617829         | 29877568 | A | 0   | 0.2857 | G |
| 13 | BICF2G630617837         | 29891687 | A | 0   | 0      | G |
| 13 | BICF2G630617841         | 29904110 | C | 0   | 0.2857 | A |
| 13 | BICF2S23043108          | 29921884 | G | 0   | 0.2857 | A |
| 13 | BICF2S23037374          | 29926042 | C | 0   | 0.2857 | A |
| 13 | BICF2G630617855         | 29935531 | G | 0   | 0.2857 | A |
| 13 | BICF2G630617860         | 29952327 | A | 0   | 0      | G |
| 13 | BICF2G630617864         | 29963871 | A | 0   | 0.2857 | T |
| 13 | BICF2S2343470           | 29972104 | C | 0.5 | 0.5    | A |
| 13 | BICF2G630617871         | 29983514 | G | 0.5 | 0.2143 | A |
| 13 | BICF2G630617879         | 29992102 | G | 0   | 0      | A |
| 13 | BICF2S23029238          | 30004936 | C | 0   | 0      | A |
| 13 | BICF2G630617896         | 30034012 | C | 0   | 0      | A |
| 13 | BICF2G630617906         | 30042064 | G | 0   | 0      | A |
| 13 | BICF2P769650            | 30060610 | A | 0   | 0.2857 | G |
| 13 | BICF2S2328722           | 30067856 | G | 0   | 0.2857 | A |
| 13 | BICF2G630617922         | 30079107 | A | 0.5 | 0.5    | G |
| 13 | BICF2G630617940         | 30097354 | A | 0.5 | 0.5    | G |
| 13 | TIGRP2P174555_rs8590846 | 30114300 | 0 | 0   | 0      | C |
| 13 | BICF2G630617959         | 30121346 | 0 | 0   | 0      | C |
| 13 | BICF2G630617967         | 30130122 | A | 0   | 0      | G |
| 13 | BICF2G630617997         | 30149191 | C | 1   | 0.7143 | G |
| 13 | BICF2S23326599          | 30155201 | A | 0   | 0.2857 | G |
| 13 | BICF2G630618014         | 30168629 | G | 0   | 0.2857 | A |
| 13 | BICF2G630618021         | 30183351 | A | 0   | 0      | G |
| 13 | BICF2G630618024         | 30194357 | G | 0   | 0.2857 | A |
| 13 | BICF2G630618026         | 30199287 | G | 0   | 0.2857 | A |
| 13 | BICF2G630618039         | 30212758 | A | 0.5 | 0.5    | C |
| 13 | BICF2G630618072         | 30260273 | C | 0.5 | 0.7857 | G |
| 13 | BICF2G630618081         | 30271940 | A | 0.5 | 0.5    | G |
| 13 | BICF2G630618100         | 30283476 | G | 0   | 0.2857 | A |
| 13 | BICF2G630618116         | 30290531 | A | 0   | 0      | G |
| 13 | BICF2G630618130         | 30301323 | A | 0   | 0      | G |
| 13 | BICF2G630618133         | 30306681 | G | 0.5 | 0.5    | A |
| 13 | BICF2S23763401          | 30314958 | 0 | 0   | 0      | G |
| 13 | BICF2S23624348          | 30327134 | A | 0.5 | 0.2143 | G |

|    |                         |          |   |     |        |   |
|----|-------------------------|----------|---|-----|--------|---|
| 13 | BICF2G630618146         | 30337930 | G | 0.5 | 0.2143 | C |
| 13 | BICF2G630618174         | 30350594 | G | 0.5 | 0.2143 | A |
| 13 | BICF2P1238954           | 30367943 | G | 0.5 | 0.2143 | A |
| 13 | BICF2G630618176         | 30379059 | 0 | 0   | 0      | A |
| 13 | BICF2G630618183         | 30385360 | A | 0   | 0      | G |
| 13 | BICF2G630618202         | 30394845 | A | 0   | 0      | C |
| 13 | BICF2S229669            | 30409698 | G | 0   | 0      | A |
| 13 | BICF2P227356            | 30418286 | A | 0   | 0      | G |
| 13 | BICF2S23545388          | 30429615 | G | 0.5 | 0.2143 | A |
| 13 | BICF2P1004600           | 30443706 | A | 0   | 0.2857 | G |
| 13 | BICF2S2302035           | 30457922 | G | 0   | 0      | A |
| 13 | BICF2G630618246         | 30467417 | A | 0   | 0.2857 | G |
| 13 | BICF2P337745            | 30480156 | A | 0   | 0.2857 | T |
| 13 | BICF2P337742            | 30480616 | A | 0   | 0.2857 | G |
| 13 | BICF2P1351100           | 30488934 | G | 0.5 | 0.1667 | A |
| 13 | BICF2S23260214          | 30503135 | A | 0.5 | 0.5    | G |
| 13 | BICF2G630618288         | 30519654 | G | 0   | 0      | A |
| 13 | BICF2G630618294         | 30522428 | A | 0   | 0      | G |
| 13 | BICF2G630618310         | 30534729 | A | 0   | 0      | G |
| 13 | BICF2G630618331         | 30547590 | A | 0   | 0      | G |
| 13 | BICF2G630618360         | 30563093 | G | 0   | 0      | A |
| 13 | BICF2G630618363         | 30564517 | G | 0   | 0      | A |
| 13 | BICF2P775070            | 30568105 | 0 | 0   | 0      | G |
| 13 | BICF2P1155894           | 30584539 | A | 0   | 0      | G |
| 13 | BICF2P807152            | 30623033 | 0 | 0   | 0      | G |
| 13 | BICF2P1158869           | 30629492 | A | 0   | 0      | G |
| 13 | TIGRP2P174559_rs8556593 | 30640949 | 0 | 0   | 0      | C |
| 13 | BICF2S22916159          | 30650656 | G | 0   | 0      | A |
| 13 | BICF2G630618369         | 30674764 | A | 0.5 | 0.5    | G |
| 13 | BICF2S23660645          | 30710676 | A | 0   | 0      | C |
| 13 | BICF2G630618373         | 30713723 | A | 0   | 0      | G |
| 13 | BICF2G630618379         | 30717162 | A | 0   | 0      | G |
| 13 | BICF2G630618416         | 30733081 | A | 0   | 0      | G |
| 13 | BICF2G630618444         | 30743867 | A | 0   | 0      | C |
| 13 | BICF2G630618449         | 30745644 | A | 0   | 0      | C |
| 13 | BICF2G630618462         | 30754643 | C | 0   | 0      | A |
| 13 | BICF2G630618481         | 30764157 | C | 0   | 0      | A |
| 13 | BICF2G630618492         | 30769347 | G | 0   | 0      | A |
| 13 | BICF2G630618495         | 30775049 | A | 0   | 0      | G |
| 13 | BICF2G630618507         | 30787669 | A | 0   | 0      | G |
| 13 | BICF2G630618522         | 30798149 | A | 0   | 0      | G |
| 13 | BICF2G630618542         | 30813061 | A | 0   | 0      | G |
| 13 | BICF2G630618554         | 30825306 | A | 0   | 0      | G |
| 13 | BICF2G630618559         | 30838820 | A | 0   | 0      | G |
| 13 | BICF2G630618591         | 30856225 | G | 0   | 0      | A |
| 13 | BICF2G630618605         | 30868506 | G | 0.5 | 0.5    | A |
| 13 | BICF2G630618654         | 30900380 | A | 0   | 0.2857 | G |

|    |                         |          |   |     |        |   |
|----|-------------------------|----------|---|-----|--------|---|
| 13 | BICF2G630618655         | 30902818 | G | 0   | 0.2857 | A |
| 13 | BICF2G630618681         | 30916232 | G | 0   | 0.2857 | A |
| 13 | BICF2G630618710         | 30940681 | A | 0   | 0.2857 | G |
| 13 | BICF2G630618769         | 30955769 | G | 0   | 0.2857 | A |
| 13 | BICF2G630618781         | 30961098 | A | 0   | 0      | G |
| 13 | BICF2G630618789         | 30977560 | A | 0   | 0      | G |
| 13 | BICF2P281287            | 30986415 | A | 0   | 0.2857 | C |
| 13 | BICF2S23420168          | 31004409 | A | 0.5 | 0.2143 | G |
| 13 | BICF2G630618796         | 31025649 | A | 0   | 0      | G |
| 13 | BICF2G630618810         | 31036508 | A | 0   | 0      | G |
| 13 | BICF2G630618831         | 31042416 | C | 0   | 0      | A |
| 13 | BICF2S23034036          | 31059708 | 0 | 0   | 0      | G |
| 13 | BICF2G630618870         | 31066269 | A | 0   | 0.2857 | G |
| 13 | BICF2S23513256          | 31080202 | A | 0   | 0      | G |
| 13 | BICF2G630618897         | 31086130 | A | 0   | 0      | G |
| 13 | BICF2G630618907         | 31102033 | C | 0   | 0      | A |
| 13 | BICF2G630618909         | 31112212 | A | 0   | 0.2857 | G |
| 13 | BICF2P1395518           | 31130087 | C | 0   | 0      | G |
| 13 | BICF2G630618919         | 31130656 | C | 0   | 0      | G |
| 13 | BICF2G630618921         | 31147170 | A | 0   | 0      | G |
| 13 | BICF2G630618928         | 31159041 | A | 0   | 0      | G |
| 13 | BICF2G630618936         | 31185854 | G | 0   | 0      | A |
| 13 | BICF2G630618942         | 31188819 | C | 0   | 0      | A |
| 13 | BICF2G630618983         | 31199619 | C | 0   | 0      | A |
| 13 | BICF2G630618994         | 31202831 | G | 0   | 0      | A |
| 13 | BICF2P918987            | 31213047 | A | 0.5 | 0.5    | G |
| 13 | BICF2G630619014         | 31228015 | A | 0   | 0      | G |
| 13 | BICF2G630619017         | 31234474 | G | 0   | 0.2857 | A |
| 13 | BICF2G630619030         | 31237887 | G | 0   | 0      | C |
| 13 | BICF2G630619060         | 31253599 | A | 0   | 0      | G |
| 13 | BICF2P618235            | 31260294 | G | 0   | 0      | A |
| 13 | BICF2G630619073         | 31270807 | A | 0   | 0      | G |
| 13 | BICF2G630619098         | 31294801 | 0 | 0   | 0      | G |
| 13 | TIGRP2P174579_rs8761632 | 31304072 | 0 | 0   | 0      | C |
| 13 | BICF2P464553            | 31319053 | A | 0.5 | 0.5    | G |
| 13 | BICF2G630619123         | 31331224 | A | 0   | 0      | G |
| 13 | BICF2G630619126         | 31337522 | G | 0.5 | 0.2143 | A |
| 13 | BICF2G630619141         | 31349384 | C | 0.5 | 0.2143 | A |
| 13 | BICF2G630619159         | 31367148 | G | 0   | 0      | A |
| 13 | BICF2G630619181         | 31382249 | A | 0   | 0      | C |
| 13 | BICF2P781264            | 31394313 | G | 0   | 0      | A |
| 13 | BICF2G630619194         | 31401399 | G | 0   | 0      | A |
| 13 | BICF2G630619197         | 31407823 | G | 0   | 0.2857 | A |
| 13 | BICF2G630619215         | 31426742 | G | 0   | 0.2857 | A |
| 13 | BICF2G630619222         | 31435535 | A | 0   | 0      | G |
| 13 | BICF2G630619230         | 31444694 | A | 0.5 | 0.5    | C |
| 13 | BICF2G630619237         | 31452777 | G | 1   | 0.7143 | A |

|    |                         |          |   |     |        |   |
|----|-------------------------|----------|---|-----|--------|---|
| 13 | BICF2G630619304         | 31471598 | A | 0.5 | 0.2143 | G |
| 13 | BICF2P1317475           | 31477041 | G | 0.5 | 0.2143 | A |
| 13 | BICF2G630619325         | 31489459 | A | 0.5 | 0.5    | G |
| 13 | BICF2P1031440           | 31500024 | G | 0.5 | 0.5    | A |
| 13 | BICF2G630619331         | 31505160 | A | 0   | 0      | G |
| 13 | BICF2P1060740           | 31510185 | A | 0.5 | 0.5    | G |
| 13 | BICF2G630619343         | 31524738 | G | 0.5 | 0.2143 | C |
| 13 | BICF2G630619371         | 31542154 | G | 0.5 | 0.5    | A |
| 13 | BICF2G630619384         | 31549297 | G | 0.5 | 0.5    | A |
| 13 | BICF2G630619413         | 31567107 | A | 0.5 | 0.5    | G |
| 13 | BICF2G630619414         | 31567400 | G | 0.5 | 0.5    | A |
| 13 | BICF2G630619420         | 31579792 | G | 0.5 | 0.5    | A |
| 13 | BICF2S23635996          | 31600104 | A | 0.5 | 0.5    | G |
| 13 | BICF2P1410751           | 31605252 | 0 | 0   | 0      | G |
| 13 | BICF2G630619428         | 31619956 | A | 0   | 0      | G |
| 13 | BICF2G630619437         | 31627168 | A | 0   | 0      | G |
| 13 | BICF2G630619458         | 31657756 | A | 0   | 0      | G |
| 13 | BICF2G630619462         | 31662809 | A | 0   | 0      | G |
| 13 | BICF2G630619472         | 31672886 | A | 0   | 0      | G |
| 13 | BICF2G630619489         | 31684733 | A | 0   | 0      | G |
| 13 | BICF2G630619494         | 31698223 | A | 0   | 0      | C |
| 13 | BICF2G630619504         | 31706359 | G | 0   | 0      | A |
| 13 | BICF2P1365035           | 31717717 | A | 0   | 0      | G |
| 13 | BICF2G630619537         | 31729720 | C | 0   | 0.2857 | A |
| 13 | BICF2P760583            | 31740738 | G | 0   | 0      | A |
| 13 | BICF2G630619544         | 31752060 | A | 0   | 0      | G |
| 13 | BICF2P551759            | 31774019 | A | 0.5 | 0.5    | C |
| 13 | BICF2P271806            | 31776337 | A | 0   | 0      | G |
| 13 | BICF2P1426653           | 31796381 | A | 0   | 0      | G |
| 13 | BICF2P1236335           | 31797159 | G | 0.5 | 0.5    | A |
| 13 | BICF2P737823            | 31807391 | 0 | 0   | 0      | G |
| 13 | BICF2G630619557         | 31823857 | A | 0   | 0.2857 | G |
| 13 | BICF2P670307            | 31834905 | A | 0   | 0.2857 | C |
| 13 | BICF2G630619573         | 31835050 | A | 0   | 0      | G |
| 13 | TIGRP2P174591_rs8766041 | 31847855 | 0 | 0   | 0      | A |
| 13 | BICF2S23646910          | 31852778 | A | 0.5 | 0.5    | G |
| 13 | BICF2G630619591         | 31858091 | G | 0   | 0.2857 | C |
| 13 | BICF2G630619594         | 31859679 | A | 0.5 | 0.5    | G |
| 13 | TIGRP2P174595_rs8696382 | 31874374 | A | 0   | 0      | T |
| 13 | BICF2G630619611         | 31879690 | A | 0   | 0      | G |
| 13 | BICF2G630619620         | 31897305 | C | 0.5 | 0.2143 | A |
| 13 | BICF2G630619621         | 31898933 | A | 0.5 | 0.2143 | C |
| 13 | BICF2G630619627         | 31902812 | G | 0.5 | 0.2143 | A |
| 13 | BICF2G630619660         | 31917724 | G | 0.5 | 0.2143 | A |
| 13 | BICF2G630619679         | 31930357 | G | 0.5 | 0.2143 | A |
| 13 | BICF2P811347            | 31937956 | A | 0.5 | 0.2143 | G |
| 13 | BICF2G630619691         | 31940728 | G | 0.5 | 0.1    | A |



|    |                         |          |   |     |        |   |
|----|-------------------------|----------|---|-----|--------|---|
| 13 | BICF2G630619706         | 31952473 | G | 0   | 0      | A |
| 13 | BICF2G630619719         | 31960674 | C | 1   | 0.7143 | A |
| 13 | BICF2G630619721         | 31963403 | A | 0   | 0.2857 | G |
| 13 | BICF2G630619742         | 31974248 | A | 0.5 | 0.2143 | G |
| 13 | BICF2G630619751         | 31983218 | A | 0.5 | 0.2143 | G |
| 13 | BICF2P742818            | 31996501 | A | 0   | 0      | C |
| 13 | BICF2P308924            | 32011274 | C | 0   | 0      | G |
| 13 | TIGRP2P174646_rs8764384 | 32026484 | G | 0   | 0.2857 | A |
| 13 | BICF2P479619            | 32028538 | A | 0   | 0.2857 | G |
| 13 | BICF2P1170281           | 32049259 | A | 0.5 | 0.5    | G |
| 13 | BICF2S23717009          | 32055774 | A | 0   | 0      | G |
| 13 | BICF2P841192            | 32073174 | A | 0   | 0      | G |
| 13 | BICF2G630619767         | 32079877 | G | 0.5 | 0.2143 | A |
| 13 | BICF2P579970            | 32085507 | C | 0   | 0      | A |
| 13 | BICF2P1252582           | 32106652 | G | 0   | 0      | A |
| 13 | BICF2P254088            | 32111293 | 0 | 0   | 0      | A |
| 13 | BICF2P309798            | 32120963 | A | 0.5 | 0.7857 | G |
| 13 | BICF2P493163            | 32133725 | A | 0   | 0      | G |
| 13 | BICF2P380260            | 32153302 | G | 0   | 0      | A |
| 13 | BICF2P1369411           | 32162822 | A | 0.5 | 0.5    | G |
| 13 | BICF2P63458             | 32169650 | A | 0   | 0.2857 | G |
| 13 | BICF2G630619819         | 32193067 | G | 0.5 | 0.5    | A |
| 13 | BICF2P1054760           | 32204972 | A | 0   | 0      | C |
| 13 | BICF2P1266641           | 32216115 | G | 0.5 | 0.7857 | A |
| 13 | BICF2P528434            | 32231330 | A | 0.5 | 0.5    | G |
| 13 | BICF2G630619833         | 32240707 | A | 0.5 | 0.5    | C |
| 13 | BICF2S24416187          | 32246860 | 0 | 0   | 0      | A |
| 13 | BICF2P789038            | 32262468 | 0 | 0   | 0      | A |
| 13 | BICF2P864619            | 32270195 | A | 0   | 0      | G |
| 13 | BICF2G630619836         | 32285206 | A | 0.5 | 0.5    | G |
| 13 | BICF2G630619848         | 32292493 | G | 0.5 | 0.5    | A |
| 13 | BICF2G630619855         | 32307487 | A | 0   | 0      | G |
| 13 | BICF2G630619863         | 32323671 | C | 0.5 | 0.5    | G |
| 13 | BICF2G630619864         | 32327745 | A | 0   | 0      | G |
| 13 | BICF2G630619869         | 32338163 | A | 0.5 | 0.7857 | G |
| 13 | BICF2G630619872         | 32356894 | C | 0.5 | 0.5    | A |
| 13 | BICF2G630619881         | 32373318 | A | 0.5 | 0.7857 | T |
| 13 | BICF2S24116911          | 32393951 | 0 | 0   | 0      | G |
| 13 | BICF2G630619891         | 32397260 | A | 0   | 0      | C |
| 13 | BICF2S22963794          | 32412417 | A | 0   | 0.2857 | G |
| 13 | BICF2S23247226          | 32417138 | C | 0   | 0      | G |
| 13 | BICF2P1092778           | 32427111 | A | 0   | 0.2857 | G |
| 13 | BICF2P172781            | 32430032 | G | 0   | 0      | A |
| 13 | TIGRP2P174743_rs8965161 | 32431486 | G | 0   | 0      | A |
| 13 | BICF2P662621            | 32431662 | G | 0   | 0      | A |
| 13 | BICF2G630619902         | 32440773 | A | 0   | 0      | G |
| 13 | BICF2G630619907         | 32446681 | A | 0   | 0      | G |

|    |                         |          |   |     |        |   |
|----|-------------------------|----------|---|-----|--------|---|
| 13 | BICF2S23050814          | 32459850 | G | 0   | 0      | A |
| 13 | BICF2G630619929         | 32471156 | A | 0.5 | 0.7857 | G |
| 13 | BICF2P876000            | 32481102 | C | 0   | 0      | G |
| 13 | TIGRP2P174758_rs8810161 | 32493472 | A | 0   | 0      | G |
| 13 | BICF2P804701            | 32508577 | G | 0   | 0      | A |
| 13 | BICF2P804700            | 32508723 | C | 0   | 0      | A |
| 13 | TIGRP2P174777_rs9078915 | 32514995 | G | 0.5 | 0.5    | A |
| 13 | BICF2P1469768           | 32532493 | A | 0   | 0      | G |
| 13 | BICF2G630619982         | 32540535 | A | 0   | 0      | G |
| 13 | BICF2P1419957           | 32554764 | T | 0   | 0      | A |
| 13 | BICF2P1419958           | 32554838 | A | 0   | 0      | G |
| 13 | BICF2P343147            | 32557602 | A | 0   | 0      | G |
| 13 | BICF2G630620049         | 32583084 | G | 0   | 0      | A |
| 13 | BICF2G630620073         | 32595455 | G | 0.5 | 0.2143 | A |
| 13 | BICF2G630620075         | 32595570 | G | 0   | 0      | A |
| 13 | BICF2G630620095         | 32604315 | A | 0   | 0      | G |
| 13 | TIGRP2P174827_rs8702804 | 32614520 | A | 0   | 0      | G |
| 13 | BICF2G630620124         | 32617578 | G | 0.5 | 0.2143 | A |
| 13 | BICF2G630620126         | 32621614 | A | 0.5 | 0.2143 | G |
| 13 | BICF2G630620154         | 32631744 | A | 0.5 | 0.2143 | G |
| 13 | BICF2S23629964          | 32637330 | G | 0.5 | 0.2143 | A |
| 13 | BICF2P1259579           | 32643673 | A | 0   | 0      | G |
| 13 | BICF2G630620188         | 32653660 | A | 0.5 | 0.2143 | G |
| 13 | BICF2G630620210         | 32663298 | A | 0.5 | 0.2143 | G |
| 13 | BICF2P514080            | 32676178 | A | 0   | 0      | G |
| 13 | BICF2S23755948          | 32687252 | 0 | 0   | 0      | G |
| 13 | BICF2G630664951         | 32715604 | G | 0.5 | 0.5    | A |
| 13 | BICF2G630664929         | 32725064 | A | 0   | 0      | G |
| 13 | BICF2G630664921         | 32729909 | A | 1   | 1      | G |
| 13 | BICF2G630664911         | 32743001 | G | 0   | 0      | A |
| 13 | BICF2G630664905         | 32753971 | A | 0.5 | 0.7857 | G |
| 13 | BICF2G630664904         | 32754029 | G | 0.5 | 0.7857 | A |
| 13 | BICF2G630664849         | 32766629 | A | 0.5 | 0.2143 | G |
| 13 | BICF2S23347189          | 32780097 | A | 0.5 | 0.5    | G |
| 13 | BICF2G630664827         | 32797842 | A | 0.5 | 0.2143 | G |
| 13 | BICF2P1104782           | 32802571 | A | 0   | 0.2857 | G |
| 13 | BICF2P1104781           | 32802694 | G | 0   | 0.2857 | A |
| 13 | BICF2G630664803         | 32813009 | A | 0   | 0      | G |
| 13 | BICF2G630664768         | 32828017 | G | 1   | 0.7143 | A |
| 13 | TIGRP2P174928_rs8643422 | 32834126 | A | 0   | 0      | G |
| 13 | BICF2P311078            | 32845973 | A | 1   | 0.7143 | G |
| 13 | BICF2G630664759         | 32862264 | A | 0   | 0      | G |
| 13 | BICF2G630664743         | 32870000 | A | 0   | 0      | G |
| 13 | BICF2S23356286          | 32887856 | 0 | 0   | 0      | G |
| 13 | BICF2G630664739         | 32891431 | G | 0   | 0      | A |
| 13 | BICF2G630664738         | 32892124 | A | 0   | 0      | G |
| 13 | BICF2G630664706         | 32905664 | G | 0   | 0.2857 | A |

|    |                 |          |   |     |        |   |
|----|-----------------|----------|---|-----|--------|---|
| 13 | BICF2P33640     | 32922977 | A | 0   | 0.2857 | G |
| 13 | BICF2P33651     | 32925027 | A | 0   | 0.2857 | G |
| 13 | BICF2P304340    | 32936958 | C | 0   | 0.2857 | A |
| 13 | BICF2G630664702 | 32958695 | G | 0.5 | 0.5    | A |
| 13 | BICF2G630664694 | 32961385 | A | 0.5 | 0.5    | G |
| 13 | BICF2S23334469  | 32974577 | A | 0.5 | 0.5    | G |
| 13 | BICF2S23346437  | 32983541 | C | 1   | 1      | G |
| 13 | BICF2G630664672 | 32998675 | A | 0   | 0.2857 | G |
| 13 | BICF2G630664654 | 33011623 | G | 0.5 | 0.7857 | A |
| 13 | BICF2P87576     | 33027153 | 0 | 0   | 0      | T |
| 13 | BICF2S23636378  | 33030373 | 0 | 0   | 0      | G |
| 13 | BICF2S2349077   | 33047146 | A | 0   | 0.2857 | G |
| 13 | BICF2S23624795  | 33060622 | G | 0.5 | 0.7857 | A |
| 13 | BICF2S23414571  | 33095524 | G | 0.5 | 0.5    | A |
| 13 | BICF2S2436191   | 33107633 | A | 0   | 0      | G |
| 13 | BICF2S23515353  | 33108681 | G | 0   | 0      | A |
| 13 | BICF2G630664626 | 33129115 | A | 0   | 0      | G |
| 13 | BICF2P668759    | 33163701 | 0 | 0   | 0      | G |
| 13 | BICF2S2438003   | 33174721 | A | 0   | 0      | G |
| 13 | BICF2S23155021  | 33185517 | G | 0.5 | 0.5    | A |
| 13 | BICF2S23154314  | 33189171 | A | 0.5 | 0.5    | G |
| 13 | BICF2G630664615 | 33201590 | G | 1   | 1      | A |
| 13 | BICF2G630664592 | 33216557 | G | 0.5 | 0.7857 | A |
| 13 | BICF2G630664577 | 33225859 | G | 0.5 | 0.7857 | A |
| 13 | BICF2G630664527 | 33235278 | G | 0   | 0      | A |
| 13 | BICF2G630664507 | 33248415 | A | 0   | 0      | G |
| 13 | BICF2P155431    | 33255848 | A | 0.5 | 0.5    | G |
| 13 | BICF2G630664494 | 33267703 | A | 0.5 | 0.5    | G |
| 13 | BICF2G630664487 | 33272472 | A | 0.5 | 0.5    | C |
| 13 | BICF2P1420208   | 33288968 | G | 0   | 0      | A |
| 13 | BICF2G630664476 | 33292885 | C | 1   | 1      | G |
| 13 | BICF2P420841    | 33301796 | A | 0   | 0      | G |
| 13 | BICF2G630664460 | 33304027 | G | 0.5 | 0.5    | A |
| 13 | BICF2S23433590  | 33316733 | G | 0.5 | 0.2143 | A |
| 13 | BICF2G630664436 | 33337260 | A | 0   | 0.2857 | G |
| 13 | BICF2G630664431 | 33339673 | A | 1   | 0.7143 | G |
| 13 | BICF2G630664399 | 33355796 | A | 0.5 | 0.5    | G |
| 13 | BICF2G630664366 | 33364734 | G | 0.5 | 0.5    | A |
| 13 | BICF2G630664365 | 33365195 | G | 0.5 | 0.5    | A |
| 13 | BICF2G630664345 | 33374965 | G | 0   | 0      | A |
| 13 | BICF2G630664319 | 33391890 | A | 0   | 0      | C |
| 13 | BICF2P233085    | 33405999 | C | 1   | 0.7143 | A |
| 13 | BICF2G630664295 | 33411520 | A | 1   | 0.7143 | G |
| 13 | BICF2G630664281 | 33422374 | G | 1   | 0.7143 | A |
| 13 | BICF2G630664277 | 33431913 | C | 0   | 0      | G |
| 13 | BICF2G630664252 | 33441918 | C | 0.5 | 0.2143 | G |
| 13 | BICF2G630664245 | 33445434 | G | 0.5 | 0.2143 | A |

|    |                         |          |   |     |        |   |
|----|-------------------------|----------|---|-----|--------|---|
| 13 | BICF2G630664222         | 33456458 | A | 0.5 | 0.2143 | G |
| 13 | BICF2G630664218         | 33475730 | A | 0.5 | 0.7857 | T |
| 13 | BICF2G630664207         | 33479028 | A | 0   | 0      | G |
| 13 | BICF2G630664197         | 33485500 | G | 1   | 1      | A |
| 13 | BICF2G630664186         | 33488679 | A | 0   | 0      | G |
| 13 | BICF2G630664162         | 33507948 | A | 0   | 0      | G |
| 13 | BICF2G630664157         | 33511619 | G | 0   | 0.2857 | A |
| 13 | BICF2G630664124         | 33524051 | A | 0   | 0.25   | C |
| 13 | BICF2P152154            | 33544668 | A | 0   | 0      | G |
| 13 | BICF2G630664091         | 33548438 | G | 0   | 0.2857 | A |
| 13 | BICF2G630664086         | 33560281 | A | 0   | 0.2857 | G |
| 13 | TIGRP2P174981_rs9028701 | 33587003 | A | 0.5 | 0.2143 | G |
| 13 | BICF2P1158405           | 33593869 | G | 0   | 0      | A |
| 13 | BICF2G630664075         | 33610279 | A | 0   | 0      | G |
| 13 | BICF2G630664074         | 33620086 | A | 0   | 0      | G |
| 13 | BICF2G630664063         | 33626067 | A | 0   | 0      | G |
| 13 | TIGRP2P174998_rs8875768 | 33638383 | A | 0   | 0      | G |
| 13 | BICF2P92516             | 33663009 | A | 0   | 0      | G |
| 13 | TIGRP2P175007_rs8810558 | 33679052 | 0 | 0   | 0      | C |
| 13 | BICF2S2338045           | 33683948 | A | 0.5 | 0.5    | G |
| 13 | BICF2P1108805           | 33696770 | G | 0   | 0      | A |
| 13 | TIGRP2P175009_rs8968851 | 33714869 | 0 | 0   | 0      | G |
| 13 | BICF2P79343             | 33729903 | 0 | 0   | 0      | A |
| 13 | BICF2S2331550           | 33741195 | G | 0.5 | 0.7857 | A |
| 13 | BICF2S2398333           | 33779389 | A | 0   | 0      | G |
| 13 | BICF2P1207620           | 33791669 | 0 | 0   | 0      | G |
| 13 | BICF2G630663968         | 33806471 | G | 1   | 1      | A |
| 13 | BICF2G630663962         | 33811919 | G | 1   | 1      | A |
| 13 | BICF2G630663956         | 33821781 | A | 0   | 0      | G |
| 13 | BICF2G630663951         | 33836437 | C | 0   | 0.2857 | A |
| 13 | BICF2G630663950         | 33846603 | A | 0   | 0.2857 | G |
| 13 | TIGRP2P175014_rs8847359 | 33863440 | A | 1   | 0.7143 | G |
| 13 | BICF2P1100069           | 33878576 | A | 1   | 0.7143 | G |
| 13 | BICF2P160815            | 33913025 | C | 0.5 | 0.2143 | A |
| 13 | BICF2G630663920         | 33922162 | G | 0.5 | 0.2143 | A |
| 13 | BICF2G630663916         | 33944462 | A | 0   | 0      | G |
| 13 | BICF2P137526            | 33960030 | 0 | 0   | 0      | C |
| 13 | TIGRP2P175032_rs8549684 | 33972579 | A | 0   | 0      | G |
| 13 | BICF2P1368861           | 33984345 | A | 0   | 0      | G |
| 13 | BICF2G630663892         | 33998013 | A | 0.5 | 0.2143 | G |
| 13 | BICF2G630663890         | 34006486 | A | 0   | 0      | G |
| 13 | BICF2G630663865         | 34038763 | G | 0   | 0      | A |
| 13 | BICF2G630663858         | 34040034 | G | 0   | 0      | A |
| 13 | BICF2G630663811         | 34062176 | A | 0.5 | 0.5    | G |
| 13 | BICF2G630663804         | 34066429 | A | 0.5 | 0.5    | G |
| 13 | BICF2P1341235           | 34068733 | G | 0   | 0      | A |
| 13 | BICF2G630663800         | 34068978 | A | 0.5 | 0.5    | C |

|    |                         |          |   |     |        |   |
|----|-------------------------|----------|---|-----|--------|---|
| 13 | BICF2P250189            | 34075018 | 0 | 0   | 0      | G |
| 13 | BICF2G630663782         | 34095411 | A | 0.5 | 0.5    | G |
| 13 | BICF2P301161            | 34099305 | A | 0.5 | 0.5    | C |
| 13 | BICF2G630663762         | 34111516 | A | 0.5 | 0.5    | C |
| 13 | BICF2P942442            | 34127507 | G | 0.5 | 0.5    | A |
| 13 | BICF2P696842            | 34133087 | G | 0.5 | 0.7857 | A |
| 13 | BICF2G630663739         | 34163909 | C | 0.5 | 0.5    | A |
| 13 | BICF2P597825            | 34170610 | T | 0   | 0.2857 | A |
| 13 | BICF2P597824            | 34171465 | G | 0.5 | 0.5    | A |
| 13 | BICF2P147542            | 34180268 | A | 0   | 0.2857 | G |
| 13 | BICF2P225956            | 34194767 | A | 0   | 0      | G |
| 13 | BICF2S23527835          | 34205573 | G | 0   | 0      | A |
| 13 | BICF2S23910481          | 34209485 | 0 | 0   | 0      | A |
| 13 | BICF2P315725            | 34219712 | A | 0   | 0.2857 | G |
| 13 | BICF2G630663736         | 34233640 | G | 0   | 0      | A |
| 13 | BICF2P713780            | 34239690 | A | 0   | 0      | G |
| 13 | BICF2G630663707         | 34250283 | A | 0   | 0      | C |
| 13 | BICF2G630663681         | 34262717 | A | 0   | 0.2857 | G |
| 13 | BICF2G630663676         | 34265913 | A | 0   | 0      | G |
| 13 | BICF2P1282363           | 34285855 | A | 0.5 | 0.2143 | C |
| 13 | BICF2G630663629         | 34295908 | G | 0   | 0      | A |
| 13 | BICF2S22921821          | 34305275 | A | 0.5 | 0.2143 | G |
| 13 | BICF2G630663590         | 34316528 | A | 0.5 | 0.7857 | G |
| 13 | BICF2P550813            | 34327425 | G | 0.5 | 0.2143 | A |
| 13 | BICF2G630663579         | 34333933 | C | 0   | 0      | G |
| 13 | BICF2G630663578         | 34333951 | G | 0   | 0      | C |
| 13 | BICF2P43663             | 34339142 | A | 0   | 0      | G |
| 13 | BICF2S2296705           | 34353224 | A | 1   | 1      | G |
| 13 | BICF2G630663527         | 34363019 | A | 0   | 0      | T |
| 13 | BICF2G630663515         | 34372439 | A | 0   | 0      | G |
| 13 | BICF2G630663507         | 34376027 | A | 0   | 0      | G |
| 13 | BICF2G630663500         | 34385888 | A | 0   | 0      | G |
| 13 | BICF2G630663498         | 34404195 | G | 0   | 0      | A |
| 13 | BICF2S23125522          | 34408086 | G | 0.5 | 0.2143 | A |
| 13 | BICF2G630663452         | 34420764 | G | 0.5 | 0.2143 | A |
| 13 | BICF2P551915            | 34435892 | A | 0.5 | 0.5    | G |
| 13 | BICF2G630663433         | 34446174 | G | 1   | 1      | A |
| 13 | BICF2S2347604           | 34460617 | G | 0   | 0      | A |
| 13 | TIGRP2P175164_rs9015357 | 34467889 | G | 0   | 0      | A |
| 13 | BICF2G630663387         | 34483867 | G | 0   | 0      | A |
| 13 | BICF2G630663381         | 34486969 | A | 1   | 0.7143 | G |
| 13 | BICF2G630663379         | 34489821 | A | 0.5 | 0.2143 | G |
| 13 | BICF2S23234741          | 34503247 | C | 1   | 0.7143 | A |
| 13 | BICF2G630663340         | 34514909 | G | 1   | 1      | A |
| 13 | BICF2P327350            | 34529752 | A | 0   | 0      | G |
| 13 | BICF2G630663321         | 34535600 | A | 1   | 1      | G |
| 13 | BICF2G630663300         | 34549442 | A | 0.5 | 0.2143 | G |

|    |                         |          |   |     |        |   |
|----|-------------------------|----------|---|-----|--------|---|
| 13 | BICF2G630663291         | 34570727 | 0 | 0   | 0      | G |
| 13 | TIGRP2P175203_rs8645196 | 34584163 | G | 0   | 0      | A |
| 13 | BICF2G630663279         | 34594944 | A | 0   | 0      | C |
| 13 | BICF2G630663274         | 34603556 | G | 0.5 | 0.7857 | A |
| 13 | BICF2G630663264         | 34608119 | G | 0.5 | 0.7857 | A |
| 13 | BICF2G630663248         | 34617466 | A | 0.5 | 0.7857 | G |
| 13 | BICF2P460641            | 34632001 | A | 0.5 | 0.2143 | C |
| 13 | BICF2G630663240         | 34647025 | G | 0   | 0.2857 | A |
| 13 | BICF2G630663227         | 34652635 | G | 0   | 0.2857 | A |
| 13 | BICF2G630663203         | 34668551 | A | 0   | 0      | G |
| 13 | BICF2G630663197         | 34676956 | A | 0.5 | 0.7857 | G |
| 13 | BICF2S23152711          | 34677019 | A | 0.5 | 0.2143 | G |
| 13 | BICF2G630663188         | 34687268 | A | 0.5 | 0.2143 | G |
| 13 | BICF2G630663129         | 34715634 | G | 0   | 0.2857 | A |
| 13 | BICF2G630663123         | 34724578 | C | 0.5 | 0.7857 | A |
| 13 | BICF2G630663107         | 34731056 | A | 0   | 0      | C |
| 13 | BICF2G630663091         | 34746846 | A | 0.5 | 0.5    | G |
| 13 | BICF2G630663089         | 34760117 | C | 0   | 0      | A |
| 13 | BICF2G630663084         | 34766737 | A | 0   | 0      | G |
| 13 | TIGRP2P175235_rs9217634 | 34788436 | 0 | 0   | 0      | G |
| 13 | BICF2G630663056         | 34809758 | G | 0.5 | 0.7857 | C |
| 13 | BICF2G630663051         | 34816534 | G | 0.5 | 0.5    | A |
| 13 | BICF2G630663047         | 34818194 | A | 0.5 | 0.5    | G |
| 13 | BICF2G630663040         | 34822334 | A | 0.5 | 0.5    | G |
| 13 | BICF2S23449422          | 34838676 | G | 0   | 0      | A |
| 13 | BICF2S23134024          | 34853291 | A | 0   | 0      | G |
| 13 | BICF2S2349330           | 34860784 | A | 0   | 0.2857 | G |
| 13 | BICF2G630663036         | 34869755 | G | 0   | 0      | A |
| 13 | BICF2S2309419           | 34873488 | A | 0   | 0      | G |
| 13 | BICF2P995789            | 34880846 | A | 0.5 | 0.5    | G |
| 13 | BICF2P1468336           | 34889109 | G | 0   | 0      | A |
| 13 | BICF2G630662988         | 34900468 | A | 0.5 | 0.7857 | G |
| 13 | BICF2G630662972         | 34902706 | G | 0.5 | 0.7857 | A |
| 13 | BICF2G630662954         | 34917697 | A | 0   | 0.2857 | C |
| 13 | BICF2G630662940         | 34926901 | C | 0   | 0.2857 | A |
| 13 | BICF2G630662915         | 34940879 | A | 0.5 | 0.2143 | G |
| 13 | BICF2G630662904         | 34949982 | A | 0   | 0      | G |
| 13 | BICF2P559136            | 34960359 | 0 | 0   | 0      | C |
| 13 | BICF2P1177996           | 34982148 | A | 0.5 | 0.7857 | G |
| 13 | BICF2G630662879         | 34985585 | G | 0.5 | 0.7857 | A |
| 13 | BICF2S24113451          | 35001500 | A | 0   | 0.2857 | G |
| 13 | G783f41S170             | 35011526 | 0 | 0   | 0      | A |
| 13 | BICF2P1148532           | 35033493 | A | 0   | 0      | G |
| 13 | G784f33S88              | 35056804 | 0 | 0   | 0      | G |
| 13 | BICF2P1039403           | 35080492 | 0 | 0   | 0      | G |
| 13 | BICF2P1020848           | 35095408 | G | 0   | 0      | A |
| 13 | TIGRP2P175253_rs8999560 | 35104852 | A | 0   | 0      | G |

|    |                         |          |   |     |        |   |
|----|-------------------------|----------|---|-----|--------|---|
| 13 | BICF2G630662855         | 35109670 | A | 0   | 0      | G |
| 13 | BICF2G630662824         | 35121837 | G | 0   | 0      | A |
| 13 | BICF2G630662767         | 35140745 | C | 0   | 0      | A |
| 13 | BICF2G630662749         | 35146152 | A | 0   | 0      | G |
| 13 | BICF2G630662729         | 35161773 | A | 0   | 0.2857 | G |
| 13 | BICF2P440002            | 35169645 | A | 0   | 0      | G |
| 13 | BICF2P1100047           | 35172957 | A | 0   | 0      | G |
| 13 | BICF2G630662694         | 35179641 | G | 0   | 0.2857 | A |
| 13 | BICF2P21135             | 35196146 | A | 0   | 0      | G |
| 13 | BICF2S23055676          | 35203774 | C | 0   | 0      | A |
| 13 | BICF2G630662670         | 35220183 | A | 0   | 0      | G |
| 13 | TIGRP2P175312_rs8598888 | 35231705 | C | 0.5 | 0.5    | A |
| 13 | BICF2G630662646         | 35243532 | T | 0   | 0      | A |
| 13 | BICF2G630662635         | 35251437 | A | 0.5 | 0.5    | G |
| 13 | BICF2G630662588         | 35280329 | G | 0.5 | 0.5    | A |
| 13 | BICF2P39618             | 35287833 | A | 0.5 | 0.5    | G |
| 13 | BICF2S23038487          | 35287960 | A | 0.5 | 0.5    | G |
| 13 | BICF2G630662543         | 35295785 | A | 0.5 | 0.5    | G |
| 13 | BICF2G630662528         | 35306185 | G | 0   | 0      | A |
| 13 | BICF2G630662502         | 35321168 | A | 0   | 0.2857 | G |
| 13 | BICF2S231378            | 35330651 | G | 0.5 | 0.5    | C |
| 13 | TIGRP2P175335_rs9125886 | 35349970 | A | 0.5 | 0.5    | G |
| 13 | BICF2G630662498         | 35354989 | C | 0.5 | 0.5    | A |
| 13 | BICF2S23131445          | 35364883 | A | 0   | 0      | G |
| 13 | BICF2G630662456         | 35377104 | A | 0.5 | 0.5    | G |
| 13 | BICF2G630662439         | 35391502 | A | 0   | 0      | G |
| 13 | BICF2G630662432         | 35397676 | G | 0.5 | 0.5    | A |
| 13 | TIGRP2P175337_rs8992944 | 35409275 | 0 | 0   | 0      | G |
| 13 | BICF2G630662393         | 35422376 | A | 0   | 0.2857 | G |
| 13 | BICF2P967691            | 35436453 | G | 0.5 | 0.5    | A |
| 13 | BICF2P525480            | 35444639 | G | 0   | 0      | A |
| 13 | BICF2S23258137          | 35457532 | 0 | 0   | 0      | G |
| 13 | BICF2G630662356         | 35468959 | A | 0   | 0      | G |
| 13 | BICF2G630662349         | 35480312 | G | 0   | 0      | A |
| 13 | BICF2G630662339         | 35497407 | G | 0   | 0      | C |
| 13 | BICF2G630662334         | 35503607 | A | 0   | 0      | C |
| 13 | BICF2G630662319         | 35512197 | G | 0.5 | 0.5    | A |
| 13 | BICF2G630662287         | 35533229 | A | 0   | 0      | G |
| 13 | BICF2G630662279         | 35544858 | A | 0   | 0      | G |
| 13 | BICF2G630662248         | 35558602 | C | 0.5 | 0.5    | G |
| 13 | BICF2G630662215         | 35574059 | G | 0.5 | 0.5    | A |
| 13 | BICF2G630662210         | 35582786 | C | 1   | 0.7143 | G |
| 13 | BICF2G630662195         | 35598158 | G | 0   | 0      | A |
| 13 | BICF2G630662178         | 35606276 | A | 0   | 0      | G |
| 13 | BICF2G630662161         | 35618615 | G | 0   | 0.2857 | A |
| 13 | BICF2P255873            | 35632103 | 0 | 0   | 0      | C |
| 13 | BICF2S22921830          | 35649101 | A | 0   | 0.2857 | C |

|    |                 |          |   |     |        |   |
|----|-----------------|----------|---|-----|--------|---|
| 13 | BICF2S23447021  | 35652816 | A | 1   | 0.7143 | G |
| 13 | BICF2G630662154 | 35692506 | A | 0   | 0.2857 | G |
| 13 | BICF2G630662153 | 35702004 | A | 0.5 | 0.5    | G |
| 13 | BICF2G630662141 | 35707965 | A | 0   | 0      | G |
| 13 | BICF2P1306367   | 35723854 | G | 1   | 1      | A |
| 13 | BICF2G630662104 | 35731309 | C | 0.5 | 0.5    | A |
| 13 | BICF2P609231    | 35749318 | G | 0.5 | 0.5    | A |
| 13 | BICF2G630662092 | 35760043 | G | 0.5 | 0.5    | A |
| 13 | BICF2G630662090 | 35769715 | A | 0   | 0      | C |
| 13 | BICF2S23513096  | 35776912 | A | 0   | 0      | C |
| 13 | BICF2G630662079 | 35788226 | A | 0   | 0      | G |
| 13 | BICF2G630662049 | 35804493 | C | 0   | 0      | A |
| 13 | BICF2G630662041 | 35811476 | G | 0   | 0      | A |
| 13 | BICF2P440683    | 35824594 | G | 0   | 0      | A |
| 13 | BICF2G630662003 | 35837969 | G | 0   | 0.2857 | A |
| 13 | BICF2G630662002 | 35838008 | C | 0   | 0.2857 | A |
| 13 | BICF2G630661962 | 35868275 | A | 0.5 | 0.5    | G |
| 13 | BICF2G630661960 | 35871175 | A | 0.5 | 0.5    | G |
| 13 | BICF2P879840    | 35883430 | G | 0.5 | 0.5    | A |
| 13 | BICF2P1367785   | 35891679 | A | 0.5 | 0.5    | G |
| 13 | BICF2G630661912 | 35904840 | A | 0   | 0      | C |
| 13 | BICF2G630661910 | 35917225 | A | 0   | 0      | G |
| 13 | BICF2P296831    | 35966843 | G | 0.5 | 0.7857 | A |
| 13 | BICF2P728019    | 35979311 | 0 | 0   | 0      | A |
| 13 | BICF2G630661904 | 35987986 | G | 0   | 0.2857 | A |
| 13 | BICF2G630661867 | 36006308 | A | 0.5 | 0.5    | C |
| 13 | BICF2G630661864 | 36008436 | A | 0.5 | 0.5    | G |
| 13 | BICF2G630661852 | 36021194 | C | 1   | 1      | G |
| 13 | BICF2P295107    | 36034328 | C | 0.5 | 0.5    | G |
| 13 | BICF2G630661804 | 36042761 | G | 0.5 | 0.7857 | A |
| 13 | BICF2P442240    | 36074552 | G | 0.5 | 0.2143 | A |
| 13 | BICF2P883484    | 36084406 | A | 0   | 0      | G |
| 13 | BICF2P1228979   | 36090993 | 0 | 0   | 0      | A |
| 13 | BICF2P290462    | 36105682 | G | 0   | 0      | A |
| 13 | BICF2P228373    | 36111764 | G | 0   | 0      | A |
| 13 | BICF2P833565    | 36125777 | G | 0   | 0      | A |
| 13 | BICF2G630661793 | 36135980 | A | 0.5 | 0.2143 | G |
| 13 | BICF2G630661779 | 36146604 | A | 0.5 | 0.2143 | G |
| 13 | BICF2G630661758 | 36175772 | 0 | 0   | 0      | A |
| 13 | BICF2G630661743 | 36185570 | A | 0.5 | 0.2143 | G |
| 13 | BICF2P897231    | 36195720 | G | 0.5 | 0.7857 | A |
| 13 | BICF2P195478    | 36204683 | A | 0   | 0.2857 | G |
| 13 | BICF2P226053    | 36233682 | G | 0.5 | 0.2143 | A |
| 13 | BICF2P274273    | 36237360 | G | 0.5 | 0.2143 | A |
| 13 | BICF2P1193484   | 36250566 | A | 0.5 | 0.2143 | G |
| 13 | BICF2G630661722 | 36265969 | A | 0.5 | 0.7857 | C |
| 13 | BICF2S232722    | 36274563 | A | 0   | 0      | G |



|    |                         |          |   |     |        |   |
|----|-------------------------|----------|---|-----|--------|---|
| 13 | BICF2G630661687         | 36280547 | 0 | 0   | 0      | C |
| 13 | BICF2P303573            | 36287320 | T | 0.5 | 0.7857 | A |
| 13 | BICF2G630661675         | 36295134 | G | 0.5 | 0.2143 | A |
| 13 | BICF2G630661658         | 36305562 | A | 0.5 | 0.7857 | G |
| 13 | BICF2G630661629         | 36317116 | A | 0.5 | 0.7857 | C |
| 13 | BICF2G630661623         | 36328548 | A | 1   | 1      | C |
| 13 | BICF2P1087868           | 36350761 | 0 | 0   | 0      | G |
| 13 | BICF2G630661615         | 36351723 | A | 0   | 0      | G |
| 13 | BICF2G630661611         | 36364067 | G | 0.5 | 0.2143 | A |
| 13 | BICF2S2412368           | 36395489 | 0 | 0   | 0      | G |
| 13 | BICF2S22952347          | 36409223 | G | 0   | 0      | A |
| 13 | BICF2S23617423          | 36424219 | A | 0   | 0      | G |
| 13 | BICF2P236412            | 36454003 | 0 | 0   | 0      | A |
| 13 | BICF2G630661603         | 36459764 | A | 0.5 | 0.2143 | G |
| 13 | BICF2G630661600         | 36460927 | A | 0.5 | 0.2143 | G |
| 13 | BICF2G630661573         | 36471804 | G | 0.5 | 0.2143 | A |
| 13 | BICF2G630661562         | 36477966 | A | 0.5 | 0.2143 | G |
| 13 | BICF2G630661547         | 36484636 | A | 0.5 | 0.2143 | G |
| 13 | BICF2G630661544         | 36486080 | A | 0.5 | 0.7857 | G |
| 13 | BICF2P1314451           | 36495331 | G | 0.5 | 0.8333 | A |
| 13 | BICF2G630661513         | 36495894 | A | 0.5 | 0.2143 | G |
| 13 | BICF2G630661494         | 36504965 | A | 0.5 | 0.2143 | G |
| 13 | BICF2P183301            | 36516145 | A | 0.5 | 0.8333 | G |
| 13 | BICF2S23224021          | 36525333 | A | 0   | 0      | G |
| 13 | BICF2G630661441         | 36538471 | A | 0   | 0      | G |
| 13 | BICF2G630661436         | 36540261 | T | 0   | 0      | A |
| 13 | BICF2P821881            | 36557919 | G | 0.5 | 0.7857 | A |
| 13 | BICF2P678186            | 36564029 | C | 0.5 | 0.7857 | A |
| 13 | BICF2P1391842           | 36568861 | A | 0.5 | 0.7857 | G |
| 13 | TIGRP2P175493_rs8796102 | 36571689 | G | 0   | 0      | A |
| 13 | BICF2G630661410         | 36589236 | T | 0   | 0      | A |
| 13 | BICF2G630661387         | 36604097 | C | 0   | 0      | G |
| 13 | BICF2P1076212           | 36605766 | A | 0   | 0      | G |
| 13 | BICF2P610951            | 36626568 | A | 0   | 0      | G |
| 13 | BICF2P610957            | 36628017 | A | 0   | 0      | T |
| 13 | BICF2S23115607          | 36638416 | T | 0   | 0      | A |
| 13 | TIGRP2P175505_rs8841289 | 36643754 | A | 0   | 0      | C |
| 13 | BICF2P587027            | 36658305 | A | 0   | 0      | G |
| 13 | BICF2P591645            | 36669119 | A | 0   | 0      | G |
| 13 | BICF2S22912678          | 36682866 | G | 0   | 0      | A |
| 13 | TIGRP2P175538_rs8610013 | 36704018 | A | 0   | 0      | G |
| 13 | BICF2P707278            | 36718259 | G | 0.5 | 0.7857 | A |
| 13 | BICF2P707280            | 36718848 | A | 0.5 | 0.7857 | G |
| 13 | BICF2P584495            | 36721024 | A | 0.5 | 0.7857 | G |
| 13 | BICF2P278261            | 36739928 | G | 1   | 1      | A |
| 13 | BICF2P1036879           | 36740681 | A | 1   | 1      | G |
| 13 | BICF2P750280            | 36744716 | A | 1   | 1      | G |

|    |                         |          |   |     |        |   |
|----|-------------------------|----------|---|-----|--------|---|
| 13 | BICF2S23320902          | 36745997 | G | 0   | 0      | A |
| 13 | BICF2P169606            | 36756880 | 0 | 0   | 0      | A |
| 13 | BICF2P899584            | 36767823 | A | 0   | 0      | G |
| 13 | BICF2P94124             | 36785376 | G | 0.5 | 0.7857 | A |
| 13 | BICF2P1046287           | 36789344 | A | 0.5 | 0.2143 | C |
| 13 | BICF2P257297            | 36791189 | G | 0   | 0      | A |
| 13 | TIGRP2P175574_rs9100767 | 36806148 | G | 0.5 | 0.7857 | A |
| 13 | BICF2P483867            | 36809937 | A | 0   | 0      | G |
| 13 | TIGRP2P175579_rs9160073 | 36818969 | A | 0.5 | 0.7857 | G |
| 13 | BICF2P984683            | 36822948 | G | 0.5 | 0.7857 | A |
| 13 | BICF2P27839             | 36833452 | A | 1   | 1      | G |
| 13 | BICF2S23139010          | 36837202 | A | 0   | 0      | G |
| 13 | BICF2S23444009          | 36861970 | A | 0.5 | 0.7857 | G |
| 13 | BICF2S23444008          | 36861995 | A | 0   | 0      | G |
| 13 | BICF2S23153546          | 36875646 | G | 0.5 | 0.7857 | A |
| 13 | BICF2G630661377         | 36884560 | G | 0.5 | 0.7857 | A |
| 13 | BICF2S23254204          | 36895625 | A | 0   | 0      | G |
| 13 | BICF2G630661376         | 36910080 | 0 | 0   | 0      | A |
| 13 | BICF2S23616468          | 36919279 | A | 0   | 0      | G |
| 13 | TIGRP2P175612_rs8946140 | 36931977 | G | 0.5 | 0.7857 | A |
| 13 | TIGRP2P175618_rs9223433 | 36938098 | G | 0.5 | 0.7857 | A |
| 13 | BICF2S23013138          | 36951495 | A | 0   | 0      | G |
| 13 | BICF2P292633            | 36968445 | A | 0.5 | 0.7857 | C |
| 13 | BICF2P945029            | 36983595 | G | 0.5 | 0.7857 | A |
| 13 | BICF2S23613461          | 36987144 | 0 | 0   | 0      | A |
| 13 | BICF2P351987            | 36998441 | A | 0.5 | 0.5    | G |
| 13 | BICF2P1205758           | 37008721 | G | 0   | 0      | A |
| 13 | BICF2P1365771           | 37020413 | A | 0   | 0.2857 | G |
| 13 | BICF2P448317            | 37034530 | G | 0   | 0.2857 | A |
| 13 | TIGRP2P175651_rs9000784 | 37043193 | G | 0   | 0      | A |
| 13 | TIGRP2P175657_rs9203624 | 37054931 | G | 0   | 0.2857 | A |
| 13 | BICF2P513213            | 37074905 | G | 0   | 0.2857 | A |
| 13 | BICF2P1050635           | 37086961 | G | 0.5 | 0.8333 | A |
| 13 | BICF2P1389335           | 37094234 | C | 0   | 0      | A |
| 13 | BICF2P1389342           | 37099592 | G | 0   | 0.2857 | A |
| 13 | BICF2G630661374         | 37121002 | A | 1   | 1      | C |
| 13 | BICF2G630661350         | 37131760 | 0 | 0   | 0      | G |
| 13 | BICF2G630661346         | 37134346 | C | 1   | 1      | A |
| 13 | BICF2G630661330         | 37155827 | A | 0   | 0      | G |
| 13 | BICF2P1022948           | 37165132 | A | 0   | 0      | G |
| 13 | TIGRP2P175706_rs8776238 | 37169637 | A | 0   | 0      | G |
| 13 | BICF2P1022924           | 37169994 | C | 0   | 0      | A |
| 13 | BICF2G630661293         | 37180519 | A | 1   | 1      | G |
| 13 | BICF2G630661292         | 37180570 | A | 1   | 1      | G |
| 13 | BICF2G630661232         | 37194215 | C | 0   | 0      | A |
| 13 | BICF2P1218173           | 37196297 | G | 0   | 0      | A |
| 13 | BICF2G630661200         | 37206165 | G | 1   | 1      | A |

|    |                         |          |   |     |        |   |
|----|-------------------------|----------|---|-----|--------|---|
| 13 | BICF2P456452            | 37222648 | G | 1   | 0.7143 | A |
| 13 | BICF2G630661166         | 37225658 | G | 1   | 1      | A |
| 13 | BICF2G630661155         | 37241373 | A | 1   | 0.7143 | G |
| 13 | BICF2G630661149         | 37254180 | C | 0   | 0      | A |
| 13 | BICF2S23323724          | 37266393 | A | 0   | 0      | G |
| 13 | BICF2G630661131         | 37277358 | A | 0   | 0      | G |
| 13 | BICF2P192527            | 37289290 | G | 0   | 0      | C |
| 13 | BICF2P213659            | 37327156 | A | 0   | 0      | G |
| 13 | BICF2P644845            | 37339875 | A | 0   | 0      | G |
| 13 | BICF2P1435078           | 37348342 | G | 0   | 0      | C |
| 13 | BICF2G630661123         | 37352436 | G | 0   | 0.2857 | A |
| 13 | BICF2G630661113         | 37365378 | G | 0   | 0.2857 | A |
| 13 | BICF2G630661097         | 37373116 | A | 0   | 0      | G |
| 13 | BICF2P936718            | 37388991 | A | 0.5 | 0.7857 | G |
| 13 | BICF2S2292287           | 37401239 | A | 0.5 | 0.7857 | G |
| 13 | BICF2G630661085         | 37418335 | A | 0   | 0.2857 | G |
| 13 | BICF2G630661071         | 37427976 | C | 0   | 0      | A |
| 13 | BICF2S23015407          | 37428126 | A | 0   | 0      | G |
| 13 | BICF2G630661044         | 37432506 | C | 0   | 0      | A |
| 13 | BICF2P683475            | 37445800 | G | 0   | 0      | A |
| 13 | BICF2G630661024         | 37446150 | G | 0   | 0      | A |
| 13 | BICF2P1134392           | 37469092 | 0 | 0   | 0      | A |
| 13 | BICF2S22920419          | 37480062 | A | 0   | 0      | G |
| 13 | BICF2P1087123           | 37489795 | G | 0   | 0      | C |
| 13 | BICF2G630660987         | 37491283 | G | 0   | 0      | A |
| 13 | BICF2G630660965         | 37495454 | G | 0   | 0.2857 | A |
| 13 | BICF2G630660948         | 37519200 | A | 0   | 0      | C |
| 13 | BICF2S23015593          | 37527169 | A | 0   | 0      | G |
| 13 | BICF2G630660937         | 37538314 | A | 0   | 0      | G |
| 13 | BICF2P1417808           | 37566130 | G | 0   | 0      | A |
| 13 | BICF2G630660912         | 37572777 | A | 0   | 0      | G |
| 13 | BICF2P165854            | 37588713 | C | 0   | 0.2857 | A |
| 13 | BICF2P509138            | 37598637 | A | 0.5 | 0.5    | G |
| 13 | BICF2P670287            | 37615946 | G | 0   | 0      | A |
| 13 | BICF2P980357            | 37619900 | A | 0.5 | 0.5    | G |
| 13 | BICF2P658244            | 37629288 | A | 0.5 | 0.5    | G |
| 13 | BICF2P280193            | 37641454 | C | 0   | 0.25   | G |
| 13 | BICF2G630660873         | 37661196 | 0 | 0   | 0      | G |
| 13 | BICF2G630660870         | 37670120 | C | 0.5 | 0.5    | A |
| 13 | BICF2G630660854         | 37675257 | G | 0   | 0.2857 | A |
| 13 | BICF2G630660838         | 37690228 | A | 0.5 | 0.2143 | G |
| 13 | BICF2G630660827         | 37704333 | G | 0   | 0.2857 | A |
| 13 | BICF2G630660823         | 37709896 | A | 0   | 0.2857 | G |
| 13 | BICF2P825395            | 37722844 | A | NA  | 0.5    | G |
| 13 | BICF2G630660784         | 37734941 | A | 0   | 0      | T |
| 13 | TIGRP2P175817_rs8439145 | 37747880 | T | 0.5 | 0.5    | A |
| 13 | BICF2G630660754         | 37755452 | A | 0.5 | 0.5    | G |

|    |                 |          |   |     |        |   |
|----|-----------------|----------|---|-----|--------|---|
| 13 | BICF2G630660719 | 37773061 | A | 0   | 0      | G |
| 13 | BICF2G630660692 | 37788978 | A | 0.5 | 0.7857 | C |
| 13 | BICF2G630660658 | 37801221 | A | 0.5 | 0.2143 | G |
| 13 | BICF2G630660656 | 37805833 | A | 0.5 | 0.2143 | G |
| 13 | BICF2P146775    | 37822374 | A | 0   | 0      | G |
| 13 | BICF2P549996    | 37834058 | G | 1   | 1      | A |
| 13 | BICF2G630660645 | 37837157 | A | 0.5 | 0.7857 | G |
| 13 | BICF2G630660641 | 37853123 | A | 0.5 | 0.2143 | G |
| 13 | BICF2S23756067  | 37884745 | G | 0   | 0      | A |
| 13 | BICF2S23151743  | 37887773 | A | 1   | 0.7143 | G |
| 13 | BICF2S2339636   | 37895005 | A | 0   | 0      | G |
| 13 | BICF2P685657    | 37908787 | A | 0   | 0      | G |
| 13 | BICF2P1210064   | 37917521 | G | 0   | 0      | A |
| 13 | BICF2G630660631 | 37930472 | A | 0.5 | 0.5    | G |
| 13 | BICF2S23022249  | 37939390 | G | 0   | 0.2857 | A |
| 13 | BICF2P1045573   | 37954808 | C | 1   | 0.7143 | A |
| 13 | BICF2S23420743  | 37966720 | A | 1   | 0.7143 | G |
| 13 | BICF2S23444068  | 37980714 | G | 1   | 0.7143 | A |
| 13 | BICF2P388897    | 37986910 | G | 1   | 0.7143 | A |
| 13 | BICF2P851323    | 37998336 | G | 1   | 0.7143 | A |
| 13 | BICF2P1472188   | 38009773 | C | 1   | 0.7143 | G |
| 13 | BICF2P796417    | 38022420 | A | 1   | 0.7143 | G |
| 13 | BICF2P975864    | 38035098 | A | 1   | 0.7143 | G |
| 13 | BICF2P1144490   | 38039368 | C | 1   | 0.7143 | A |
| 13 | BICF2P81554     | 38044801 | A | 1   | 0.7143 | G |
| 13 | BICF2P1284835   | 38057700 | G | 0   | 0      | A |
| 13 | BICF2G630660626 | 38069672 | G | 0.5 | 0.2143 | A |
| 13 | BICF2G630660624 | 38075883 | G | 0.5 | 0.5    | A |
| 13 | BICF2G630660621 | 38080624 | G | 0.5 | 0.5    | A |
| 13 | BICF2P1029087   | 38089061 | A | 1   | 0.7143 | G |
| 13 | BICF2S23534826  | 38102290 | A | 0   | 0      | C |
| 13 | BICF2P465853    | 38125820 | 0 | 0   | 0      | T |
| 13 | BICF2P492701    | 38143444 | A | 1   | 0.7143 | G |
| 13 | BICF2P802958    | 38149473 | G | 0   | 0      | A |
| 13 | BICF2P1239967   | 38158117 | G | 1   | 0.7143 | A |
| 13 | BICF2P325132    | 38179709 | G | 1   | 0.7143 | A |
| 13 | BICF2G630660597 | 38181131 | C | 0.5 | 0.5    | A |
| 13 | BICF2P748749    | 38189408 | A | 0   | 0      | G |
| 13 | BICF2P1117105   | 38191710 | C | 1   | 0.7143 | A |
| 13 | BICF2G630660582 | 38208376 | G | 0.5 | 0.7857 | A |
| 13 | BICF2G630660558 | 38250477 | A | 0.5 | 0.5    | G |
| 13 | BICF2P679221    | 38260993 | A | 0   | 0.2857 | C |
| 13 | BICF2P1117797   | 38291184 | G | 0.5 | 0.5    | A |
| 13 | BICF2P23728     | 38300049 | G | 1   | 0.7143 | A |
| 13 | BICF2G630660485 | 38318179 | G | 0.5 | 0.2143 | A |
| 13 | BICF2S23228783  | 38333057 | A | 0   | 0      | G |
| 13 | BICF2G630660458 | 38354835 | G | 1   | 0.7143 | A |

|    |                         |          |   |     |        |   |
|----|-------------------------|----------|---|-----|--------|---|
| 13 | BICF2G630660451         | 38365363 | 0 | 0   | 0      | G |
| 13 | BICF2G630660444         | 38386616 | A | 0.5 | 0.5    | G |
| 13 | BICF2G630660442         | 38387509 | A | 0.5 | 0.2143 | G |
| 13 | BICF2G630660440         | 38400480 | A | 0.5 | 0.1667 | G |
| 13 | BICF2G630660435         | 38419708 | G | 0.5 | 0.7857 | A |
| 13 | BICF2G630660432         | 38429716 | A | 0.5 | 0.7857 | G |
| 13 | BICF2G630660424         | 38455029 | A | 0.5 | 0.7857 | G |
| 13 | BICF2G630660422         | 38471065 | G | 0.5 | 0.2143 | A |
| 13 | BICF2P571801            | 38481069 | G | 0   | 0.2857 | A |
| 13 | BICF2G630660420         | 38482213 | A | 0   | 0      | C |
| 13 | BICF2G630660417         | 38490752 | A | 0   | 0      | G |
| 13 | BICF2S23758120          | 38511722 | A | 0   | 0.2857 | G |
| 13 | BICF2P375307            | 38515891 | G | 0   | 0.2857 | A |
| 13 | BICF2P624682            | 38531188 | G | 0   | 0.2857 | A |
| 13 | BICF2G630660409         | 38539550 | A | 0.5 | 0.4167 | G |
| 13 | BICF2G630660405         | 38561661 | G | 0.5 | 0.2143 | A |
| 13 | BICF2S23636275          | 38569382 | A | 0   | 0.2857 | T |
| 13 | BICF2G630660403         | 38571369 | A | 0.5 | 0.25   | G |
| 13 | BICF2G630660400         | 38587056 | A | 0.5 | 0.5    | G |
| 13 | BICF2P71130             | 38596381 | G | 0   | 0.2857 | A |
| 13 | BICF2G630660396         | 38605886 | A | 0.5 | 0.5    | G |
| 13 | BICF2P571027            | 38607382 | G | 0   | 0.2857 | A |
| 13 | BICF2P752095            | 38612845 | A | 0.5 | 0.2143 | C |
| 13 | BICF2G630660391         | 38619424 | A | 0.5 | 0.2143 | G |
| 13 | BICF2G630660380         | 38629809 | C | 0.5 | 0.5    | A |
| 13 | BICF2G630660371         | 38657463 | G | 0.5 | 0.5    | A |
| 13 | BICF2S2292176           | 38672659 | A | 0.5 | 0.5    | G |
| 13 | BICF2P938178            | 38681860 | A | 0   | 0      | G |
| 13 | BICF2G630660366         | 38689869 | A | 0.5 | 0.5    | G |
| 13 | BICF2G630660359         | 38701474 | G | 0   | 0      | A |
| 13 | BICF2G630660343         | 38722774 | A | 0   | 0      | G |
| 13 | BICF2G630660342         | 38733877 | A | 0   | 0      | G |
| 13 | BICF2P890624            | 38752200 | 0 | 0   | 0      | A |
| 13 | BICF2G630660341         | 38773343 | A | 0.5 | 0.2143 | G |
| 13 | BICF2G630660307         | 38788099 | A | 0.5 | 0.2143 | G |
| 13 | BICF2P1312434           | 38799271 | G | 0.5 | 0.2143 | A |
| 13 | BICF2G630660278         | 38820391 | G | 0.5 | 0.2143 | A |
| 13 | BICF2G630660270         | 38833993 | A | 0.5 | 0.2143 | G |
| 13 | BICF2G630660252         | 38852270 | A | 0.5 | 0.7857 | G |
| 13 | BICF2P1056073           | 38870418 | A | 0.5 | 0.2143 | G |
| 13 | BICF2G630660210         | 38893271 | A | 0.5 | 0.2143 | G |
| 13 | BICF2G630660190         | 38906428 | G | 0.5 | 0.2143 | A |
| 13 | BICF2P873212            | 38916943 | A | 0   | 0      | G |
| 13 | BICF2P482732            | 38934257 | A | 0   | 0      | C |
| 13 | BICF2P660592            | 38944218 | G | 0   | 0      | A |
| 13 | BICF2P72661             | 38953706 | A | 0   | 0      | G |
| 13 | TIGRP2P175892_rs8863523 | 38979475 | G | 0   | 0      | A |

|    |                         |          |   |     |        |   |
|----|-------------------------|----------|---|-----|--------|---|
| 13 | BICF2P569551            | 38992813 | A | 0   | 0      | G |
| 13 | TIGRP2P175913_rs9025296 | 39000875 | A | 0   | 0      | G |
| 13 | BICF2G630660140         | 39009659 | A | 0   | 0      | C |
| 13 | BICF2G630660137         | 39019288 | A | 0   | 0      | G |
| 13 | BICF2P733039            | 39020014 | G | 0   | 0      | A |
| 13 | BICF2P733036            | 39020554 | A | 0   | 0      | G |
| 13 | BICF2G630660124         | 39037695 | G | 0   | 0      | A |
| 13 | BICF2G630660078         | 39050256 | C | 0   | 0      | A |
| 13 | BICF2P1456803           | 39057114 | A | 0   | 0      | G |
| 13 | BICF2S2312495           | 39069439 | A | 0   | 0      | G |
| 13 | BICF2G630660062         | 39077361 | C | 0   | 0      | G |
| 13 | BICF2P1153187           | 39091923 | A | 0   | 0      | G |
| 13 | BICF2G630660041         | 39101344 | G | 0   | 0      | C |
| 13 | BICF2G630660032         | 39117573 | A | 0   | 0      | G |
| 13 | BICF2G630660023         | 39124299 | G | 0   | 0      | A |
| 13 | BICF2G630660002         | 39134590 | A | 0   | 0      | G |
| 13 | BICF2G630659992         | 39146080 | A | 0   | 0.2857 | G |
| 13 | BICF2P109838            | 39160898 | A | 0   | 0      | G |
| 13 | BICF2G630659980         | 39172713 | A | 0   | 0      | G |
| 13 | BICF2G630659956         | 39187805 | 0 | 0   | 0      | A |
| 13 | TIGRP2P176006_rs8677293 | 39200073 | G | 0   | 0      | A |
| 13 | BICF2G630659942         | 39204783 | A | 0   | 0      | G |
| 13 | BICF2G630659916         | 39220108 | 0 | 0   | 0      | G |
| 13 | BICF2P216391            | 39228804 | G | 0   | 0      | C |
| 13 | TIGRP2P176022_rs9000931 | 39249002 | A | 1   | 0.7143 | G |
| 13 | TIGRP2P176026_rs8545228 | 39257467 | C | 0   | 0.2857 | A |
| 13 | TIGRP2P176042_rs8958811 | 39270066 | G | 0   | 0.2857 | A |
| 13 | TIGRP2P176063_rs8683653 | 39275649 | G | 0   | 0.2857 | A |
| 13 | BICF2P660922            | 39291304 | A | 0   | 0.2857 | G |
| 13 | BICF2S22953628          | 39310559 | A | 1   | 0.7143 | T |
| 13 | TIGRP2P176071_rs8514828 | 39324238 | G | 1   | 0.7143 | A |
| 13 | TIGRP2P176086_rs8655878 | 39340693 | G | 1   | 0.7143 | A |
| 13 | BICF2P1190099           | 39344846 | 0 | 0   | 0      | G |
| 13 | G786f7S243              | 39359077 | 0 | 0   | 0      | A |
| 13 | G787f1S87               | 39468119 | G | 0   | 0.2857 | A |
| 13 | BICF2P856661            | 39482412 | G | 0   | 0.2857 | A |
| 13 | BICF2P1214585           | 39493379 | A | 0   | 0.2857 | G |
| 13 | BICF2P153396            | 39503731 | G | 0   | 0.2857 | A |
| 13 | BICF2G630659893         | 39536367 | G | 0   | 0.2857 | A |
| 13 | BICF2G630659890         | 39539031 | G | 0.5 | 0.7857 | A |
| 13 | BICF2G630659885         | 39559197 | G | 0   | 0      | A |
| 13 | BICF2S23057422          | 39562333 | G | 0   | 0      | A |
| 13 | BICF2G630659881         | 39575650 | G | 0   | 0      | A |
| 13 | BICF2S23061158          | 39583140 | G | 0   | 0      | A |
| 13 | BICF2G630659864         | 39604322 | G | 0   | 0      | A |
| 13 | BICF2G630659861         | 39606725 | G | 0   | 0      | A |
| 13 | TIGRP2P176221_rs8943020 | 39620437 | A | 0   | 0      | G |

|    |                         |          |   |     |        |   |
|----|-------------------------|----------|---|-----|--------|---|
| 13 | BICF2P115822            | 39638121 | 0 | 0   | 0      | C |
| 13 | BICF2P974348            | 39648619 | A | 0   | 0      | G |
| 13 | BICF2P904405            | 39659089 | G | 0   | 0      | A |
| 13 | BICF2P666975            | 39682177 | 0 | 0   | 0      | G |
| 13 | BICF2P405937            | 39693544 | G | 0   | 0      | A |
| 13 | BICF2P557151            | 39705171 | A | 1   | 0.7143 | G |
| 13 | BICF2P1153057           | 39719836 | A | 1   | 1      | G |
| 13 | BICF2P326613            | 39731013 | 0 | 0   | 0      | A |
| 13 | BICF2P389221            | 39733419 | G | 0   | 0      | A |
| 13 | BICF2P686645            | 39744851 | G | 0   | 0      | A |
| 13 | BICF2S22930869          | 39755742 | G | 0   | 0      | A |
| 13 | TIGRP2P176253_rs8549359 | 39807364 | A | 0   | 0      | G |
| 13 | TIGRP2P176257_rs9069108 | 39822159 | A | 0   | 0      | G |
| 13 | BICF2P1388043           | 39824671 | A | 0   | 0.25   | G |
| 13 | BICF2P85528             | 39919155 | A | 0   | 0      | C |
| 13 | BICF2P687172            | 39937059 | G | 0.5 | 0.5    | A |
| 13 | TIGRP2P176391_rs8804149 | 39939952 | G | 0.5 | 0.5    | A |
| 13 | BICF2P888791            | 39952312 | A | 0   | 0      | G |
| 13 | TIGRP2P176398_rs8707240 | 39964682 | A | 0   | 0.25   | G |
| 13 | BICF2P518128            | 39984936 | G | 0   | 0.2857 | A |
| 13 | BICF2S23332352          | 39991876 | A | 0   | 0.2857 | G |
| 13 | TIGRP2P176414_rs8788636 | 40002969 | G | 0   | 0.2857 | A |
| 13 | TIGRP2P176424_rs9229214 | 40017103 | A | 0   | 0.2857 | G |
| 13 | BICF2P1342321           | 40028636 | G | 1   | 0.7143 | A |
| 13 | BICF2S23651344          | 40038221 | A | 1   | 0.7143 | G |
| 13 | BICF2P401294            | 40043480 | A | 1   | 0.7143 | C |
| 13 | BICF2P506903            | 40058734 | G | 1   | 0.7143 | A |
| 13 | BICF2P1375119           | 40066364 | G | 1   | 0.7143 | A |
| 13 | TIGRP2P176439_rs8700288 | 40078533 | A | 1   | 0.7143 | G |
| 13 | BICF2S22929305          | 40093508 | A | 0   | 0.2857 | G |
| 13 | BICF2P616808            | 40101896 | G | 0   | 0      | A |
| 13 | BICF2P333167            | 40116822 | C | 0   | 0      | G |
| 13 | BICF2P595459            | 40133991 | 0 | 0   | 0      | G |
| 13 | TIGRP2P176443_rs8674906 | 40150443 | A | 0   | 0      | G |
| 13 | TIGRP2P176444_rs8814067 | 40159269 | G | 0   | 0.2857 | A |
| 13 | TIGRP2P176445_rs8495575 | 40176696 | 0 | 0   | 0      | G |
| 13 | BICF2P1337083           | 40193256 | G | 0   | 0.2    | A |
| 13 | BICF2P1175562           | 40219471 | 0 | 0   | 0      | G |
| 13 | BICF2S2327451           | 40232786 | G | 0   | 0.2857 | A |
| 13 | BICF2P1221442           | 40248539 | A | 0   | 0      | C |
| 13 | BICF2P1010240           | 40287203 | G | 0   | 0.2857 | A |
| 13 | TIGRP2P176458_rs8725777 | 40298420 | C | 0   | 0      | G |
| 13 | BICF2P408008            | 40312204 | G | 0   | 0.2857 | A |
| 13 | TIGRP2P176467_rs9222064 | 40321553 | 0 | 0   | 0      | T |
| 13 | BICF2P555456            | 40337221 | G | 0   | 0      | C |
| 13 | BICF2P1235276           | 40355093 | 0 | 0   | 0      | G |
| 13 | BICF2S2361247           | 40374407 | A | 0   | 0      | G |

|    |                         |          |   |     |     |   |
|----|-------------------------|----------|---|-----|-----|---|
| 13 | BICF2S23260030          | 40378585 | C | 0   | 0   | A |
| 13 | BICF2P219427            | 40394098 | 0 | 0   | 0   | C |
| 13 | BICF2P683337            | 40407294 | 0 | 0   | 0   | C |
| 13 | TIGRP2P176484_rs8776853 | 40423460 | 0 | 0   | 0   | G |
| 13 | TIGRP2P176487_rs9233725 | 40439145 | 0 | 0   | 0   | G |
| 13 | TIGRP2P176490_rs8571485 | 40453518 | A | 0   | 0   | G |
| 13 | BICF2P650894            | 40468201 | A | 0   | 0   | G |
| 13 | BICF2P894481            | 40478061 | A | 0   | 0   | G |
| 13 | BICF2P702892            | 40491118 | A | 0   | 0   | G |
| 13 | BICF2P1244912           | 40492992 | G | 0   | 0   | A |
| 13 | TIGRP2P176504_rs9145032 | 40505186 | A | 0   | 0   | G |
| 13 | BICF2P878212            | 40519958 | A | 0   | 0   | G |
| 13 | BICF2P1449375           | 40535666 | A | 1   | 1   | G |
| 13 | BICF2P240077            | 40543304 | 0 | 0   | 0   | G |
| 13 | BICF2P732988            | 40559104 | A | 0   | 0   | G |
| 13 | BICF2P144962            | 40590170 | A | 0   | 0   | G |
| 13 | BICF2P762995            | 40623574 | 0 | 0   | 0   | C |
| 13 | BICF2P144320            | 40640427 | 0 | 0   | 0   | C |
| 13 | BICF2P377920            | 40646341 | A | 1   | 1   | G |
| 13 | TIGRP2P176512_rs9032647 | 40659377 | 0 | 0   | 0   | G |
| 13 | BICF2P1101773           | 40670897 | 0 | 0   | 0   | A |
| 13 | BICF2P1126664           | 40696879 | A | 0   | 0   | G |
| 13 | TIGRP2P176520_rs8851764 | 40707303 | A | 0   | 0   | G |
| 13 | BICF2S23661837          | 40738270 | C | 0   | 0   | G |
| 13 | TIGRP2P176534_rs8603950 | 40763859 | G | 0.5 | 0.5 | A |
| 13 | BICF2P1258070           | 40771685 | G | 0.5 | 0.5 | A |
| 13 | TIGRP2P176541_rs9081625 | 40780175 | A | 0   | 0   | G |
| 13 | BICF2P111900            | 40797838 | A | 0.5 | 0.5 | G |
| 13 | TIGRP2P176544_rs8821775 | 40803786 | A | 0.5 | 0.5 | G |
| 13 | BICF2P314076            | 40819219 | 0 | 0   | 0   | C |
| 13 | BICF2P361664            | 40838906 | A | 0.5 | 0.5 | G |
| 13 | BICF2P155672            | 40852647 | A | 0.5 | 0.5 | G |
| 13 | BICF2P958892            | 40866643 | A | 0.5 | 0.5 | G |
| 13 | TIGRP2P176577_rs9174937 | 40885538 | G | 0.5 | 0.5 | A |
| 13 | TIGRP2P176579_rs8573270 | 40895102 | 0 | 0   | 0   | G |
| 13 | BICF2P1433021           | 40912855 | C | 0.5 | 0.5 | G |
| 13 | TIGRP2P176585_rs9246424 | 40933958 | G | 0.5 | 0.5 | A |
| 13 | BICF2P955972            | 40960800 | 0 | 0   | 0   | A |
| 13 | BICF2P496164            | 40965355 | G | 0   | 0   | A |
| 13 | TIGRP2P176590_rs8808518 | 40974602 | G | 0   | 0   | A |
| 13 | BICF2P643204            | 40994738 | 0 | 0   | 0   | C |
| 13 | BICF2P242812            | 41008570 | G | 0   | 0   | A |
| 13 | BICF2P687897            | 41012278 | G | 0   | 0   | A |
| 13 | BICF2P1345457           | 41025022 | C | 0   | 0   | G |
| 13 | BICF2P451665            | 41044568 | A | 0   | 0   | G |
| 13 | BICF2S23636776          | 41062867 | A | 0   | 0   | G |
| 13 | BICF2P1098740           | 41075945 | 0 | 0   | 0   | A |



|    |                         |          |   |     |        |   |
|----|-------------------------|----------|---|-----|--------|---|
| 13 | BICF2P595171            | 41093935 | A | 0   | 0      | G |
| 13 | BICF2P1259082           | 41102218 | A | 0   | 0      | G |
| 13 | BICF2P701584            | 41137026 | 0 | 0   | 0      | G |
| 13 | TIGRP2P176618_rs8718733 | 41158285 | A | 0   | 0      | G |
| 13 | BICF2P779429            | 41159825 | G | 0   | 0      | A |
| 13 | BICF2P678948            | 41173072 | G | 0   | 0      | A |
| 13 | BICF2P277644            | 41192900 | A | 0   | 0      | G |
| 13 | TIGRP2P176628_rs9188854 | 41225442 | G | 0   | 0      | A |
| 13 | TIGRP2P176631_rs8779100 | 41245034 | A | 1   | 1      | C |
| 13 | BICF2P1027695           | 41317894 | A | 0   | 0      | C |
| 13 | BICF2P166765            | 41339418 | G | 0   | 0      | A |
| 13 | BICF2P923761            | 41345505 | A | 1   | 1      | G |
| 13 | BICF2P1116535           | 41360182 | C | 1   | 1      | G |
| 13 | TIGRP2P176687_rs9113774 | 41369063 | A | 0   | 0      | G |
| 13 | TIGRP2P176690_rs8673809 | 41378109 | A | 0   | 0      | G |
| 13 | BICF2P258310            | 41392313 | A | 1   | 1      | G |
| 13 | BICF2P1171551           | 41409911 | 0 | 0   | 0      | G |
| 13 | TIGRP2P176710_rs8942986 | 41416739 | A | 0   | 0      | G |
| 13 | BICF2P343794            | 41427051 | A | 0   | 0      | G |
| 13 | BICF2P777               | 41436453 | A | 0   | 0      | G |
| 13 | BICF2P1009958           | 41452692 | G | 1   | 1      | A |
| 13 | BICF2P809826            | 41457519 | A | 1   | 1      | G |
| 13 | BICF2P1208964           | 41470039 | A | 1   | 1      | G |
| 13 | BICF2P727255            | 41483869 | A | 1   | 1      | G |
| 13 | BICF2P111966            | 41505692 | A | 1   | 1      | T |
| 13 | BICF2P1368650           | 41520458 | A | 1   | NA     | G |
| 13 | BICF2P1344904           | 41537705 | A | 1   | 1      | G |
| 13 | TIGRP2P176729_rs8864233 | 41545587 | A | 0   | 0      | G |
| 13 | BICF2P223873            | 41553395 | A | 1   | 1      | G |
| 13 | BICF2P613745            | 41568665 | A | 0   | 0      | G |
| 13 | BICF2P182629            | 41576673 | C | 0   | 0      | A |
| 13 | BICF2S23059696          | 41585837 | 0 | 0   | 0      | A |
| 13 | TIGRP2P176750_rs8659993 | 41606895 | A | 1   | 1      | G |
| 13 | BICF2P446760            | 41628680 | A | 0   | 0      | G |
| 13 | BICF2P446764            | 41629907 | A | 0   | 0      | G |
| 13 | BICF2P452680            | 41635249 | A | 0   | NA     | G |
| 13 | BICF2P655956            | 41643567 | G | 0   | 0      | A |
| 13 | TIGRP2P176800_rs9139246 | 41665437 | G | 0.5 | 0.7857 | A |
| 13 | BICF2P199883            | 41680656 | A | 0.5 | 0.2143 | G |
| 13 | BICF2P584167            | 41692814 | A | 0.5 | 0.2143 | G |
| 13 | BICF2P325472            | 41708313 | G | 0   | 0      | A |
| 13 | BICF2S2358505           | 41712382 | A | 0.5 | 0.7857 | G |
| 13 | BICF2P700794            | 41722840 | A | 0.5 | 0.2143 | C |
| 13 | BICF2P1154155           | 41744018 | G | 0   | 0      | A |
| 13 | TIGRP2P176844_rs8882552 | 41757074 | A | 0   | 0      | G |
| 13 | BICF2S230686            | 41770256 | G | 0   | 0      | A |
| 13 | BICF2P525545            | 41782606 | A | 0.5 | 0.2143 | G |

|    |                         |          |   |     |        |   |
|----|-------------------------|----------|---|-----|--------|---|
| 13 | BICF2P259334            | 41794539 | G | 0.5 | 0.2143 | A |
| 13 | TIGRP2P176855_rs9127778 | 41805506 | G | 0.5 | 0.2143 | A |
| 13 | BICF2S23450765          | 41806172 | A | 0   | 0      | G |
| 13 | BICF2S23519755          | 41819183 | A | 0.5 | 0.2143 | C |
| 13 | BICF2P323576            | 41830162 | A | 0.5 | 0.2143 | G |
| 13 | BICF2P474272            | 41840487 | A | 0.5 | 0.2143 | G |
| 13 | BICF2S23618399          | 41848807 | C | 0.5 | 0.2143 | A |
| 13 | BICF2S2356778           | 41869849 | G | 0.5 | 0.2143 | A |
| 13 | BICF2P64599             | 41882464 | G | 0   | 0      | A |
| 13 | TIGRP2P176879_rs8865753 | 41889917 | G | 0   | 0.4    | A |
| 13 | BICF2S2328025           | 41904902 | C | 0   | 0.2857 | G |
| 13 | BICF2P473216            | 41931464 | A | 0.5 | 0.375  | G |
| 13 | TIGRP2P176902_rs8718686 | 41953803 | 0 | 0   | 0      | A |
| 13 | TIGRP2P176915_rs8974490 | 41969307 | G | 0   | 0.4    | A |
| 13 | BICF2P850838            | 41975956 | A | 0.5 | 0.7857 | G |
| 13 | BICF2P1399501           | 41986813 | A | 0.5 | 0.7857 | G |
| 13 | BICF2P274825            | 41999163 | A | 0   | 0.2857 | G |
| 13 | BICF2P732536            | 42010285 | C | 0.5 | 0.7857 | A |
| 13 | BICF2P950859            | 42029389 | G | 0.5 | 0.7857 | A |
| 13 | BICF2S23627020          | 42042304 | G | 0.5 | 0.7857 | A |
| 13 | TIGRP2P176993_rs9197628 | 42095281 | A | 0   | 0      | G |
| 13 | BICF2P1277196           | 42108318 | 0 | 0   | 0      | G |
| 13 | BICF2P762421            | 42118179 | A | 0   | 0      | G |
| 13 | BICF2S23125810          | 42128053 | A | 0.5 | 0.5    | C |
| 13 | TIGRP2P177014_rs8995898 | 42144618 | G | 0.5 | 0.5    | A |
| 13 | BICF2P1114091           | 42163415 | A | 0.5 | 0.5    | C |
| 13 | TIGRP2P177030_rs8677451 | 42178213 | 0 | 0   | 0      | G |
| 13 | BICF2P1375227           | 42209111 | 0 | 0   | 0      | A |
| 13 | BICF2P1083122           | 42226360 | A | 0   | 0.2857 | C |
| 13 | BICF2P806281            | 42228982 | 0 | 0   | 0      | G |
| 13 | BICF2P717613            | 42245605 | G | 0.5 | 0.5    | A |
| 13 | BICF2P458350            | 42284475 | G | 0   | 0.2857 | A |
| 13 | BICF2P458361            | 42285538 | G | 0.5 | 0.7857 | A |
| 13 | BICF2S23138137          | 42302989 | G | 0.5 | 0.9    | A |
| 13 | BICF2P163461            | 42310177 | A | 0.5 | 0.7857 | G |
| 13 | BICF2S23255142          | 42342005 | A | 0.5 | 0.2143 | G |
| 13 | BICF2P1014054           | 42353912 | G | 0.5 | 0.2143 | A |
| 13 | BICF2P1014057           | 42354623 | A | 0.5 | 0.2143 | G |
| 13 | BICF2S2319824           | 42367681 | G | 0   | 0      | A |
| 13 | TIGRP2P177114_rs8993487 | 42389698 | G | 0.5 | 0.7857 | A |
| 13 | BICF2S23132561          | 42405267 | A | 0.5 | 0.5    | G |
| 13 | TIGRP2P177132_rs9072029 | 42415530 | A | 0.5 | 0.5    | G |
| 13 | TIGRP2P177145_rs8825000 | 42429070 | A | 0   | 0.2857 | G |
| 13 | BICF2P536739            | 42441493 | G | 0   | 0      | A |
| 13 | BICF2S23222210          | 42456241 | 0 | 0   | 0      | A |
| 13 | BICF2S22911410          | 42460613 | G | 0   | 0      | A |
| 13 | BICF2S23452887          | 42469603 | G | 0   | 0      | A |

|    |                         |          |   |     |        |   |
|----|-------------------------|----------|---|-----|--------|---|
| 13 | TIGRP2P177178_rs9243638 | 42481707 | G | 0   | 0      | A |
| 13 | BICF2S23512789          | 42494060 | G | 0.5 | 0.2143 | A |
| 13 | BICF2S2352133           | 42518430 | 0 | 0   | 0      | A |
| 13 | BICF2S23024720          | 42547807 | A | 0   | 0      | G |
| 13 | BICF2P752379            | 42555118 | A | 1   | 1      | G |
| 13 | BICF2P245810            | 42563776 | G | 0.5 | 0.2143 | A |
| 13 | BICF2P1114844           | 42574933 | A | 0.5 | 0.2143 | G |
| 13 | TIGRP2P177219_rs9163142 | 42588322 | 0 | 0   | 0      | A |
| 13 | BICF2P527054            | 42597490 | A | 0.5 | 0.2143 | G |
| 13 | BICF2S2314086           | 42609816 | G | 0.5 | 0.2143 | A |
| 13 | TIGRP2P177233_rs9045880 | 42628665 | C | 0.5 | 0.7857 | A |
| 13 | BICF2P548490            | 42636445 | G | 0.5 | 0.5    | A |
| 13 | BICF2P43418             | 42642035 | G | 0.5 | 0.5    | A |
| 13 | BICF2S23534954          | 42657900 | A | 0   | 0      | C |
| 13 | BICF2P1271141           | 42669585 | G | 0.5 | 0.2143 | A |
| 13 | BICF2P112870            | 42685782 | G | 0.5 | 0.5    | A |
| 13 | BICF2S23047211          | 42690005 | A | 0   | 0      | G |
| 13 | BICF2P3566              | 42699722 | A | 0   | 0      | G |
| 13 | TIGRP2P177259_rs8557411 | 42717810 | A | 0.5 | 0.5    | C |
| 13 | BICF2S23742272          | 42725188 | G | 0.5 | 0.5    | A |
| 13 | BICF2S23527212          | 42735060 | A | 0   | 0      | G |
| 13 | BICF2P691822            | 42747805 | A | 1   | 1      | C |
| 13 | BICF2P1290063           | 42765415 | A | 0   | 0      | G |
| 13 | BICF2S23061406          | 42779601 | G | 0.5 | 0.5    | A |
| 13 | BICF2P333208            | 42790446 | G | 1   | 0.7143 | A |
| 13 | BICF2S23553466          | 42794296 | C | 0.5 | 0.1667 | A |
| 13 | BICF2S23510393          | 42804787 | A | 0   | 0      | G |
| 13 | BICF2P430815            | 42816068 | A | 0   | 0      | G |
| 13 | BICF2P732831            | 42822577 | C | 0.5 | 0.5    | A |
| 13 | BICF2P909176            | 42826508 | G | 0   | 0      | A |
| 13 | BICF2S23758443          | 42840594 | A | 0   | 0      | G |
| 13 | BICF2P527662            | 42851316 | A | 0   | 0      | G |
| 13 | BICF2S23344875          | 42866423 | A | 0   | 0      | G |
| 13 | BICF2P945372            | 42878949 | A | 0.5 | 0.2143 | G |
| 13 | BICF2P671045            | 42892328 | G | 0   | 0      | A |
| 13 | BICF2P191121            | 42897097 | G | 0   | 0      | A |
| 13 | BICF2S23032034          | 42907015 | G | 0   | 0      | A |
| 13 | TIGRP2P177293_rs9082252 | 42925343 | 0 | 0   | 0      | A |
| 13 | BICF2P322655            | 42931121 | 0 | 0   | 0      | G |
| 13 | BICF2S23319071          | 42943382 | 0 | 0   | 0      | G |
| 13 | BICF2P648981            | 42961566 | A | 0.5 | 0.2143 | G |
| 13 | TIGRP2P177299_rs8888544 | 42967916 | 0 | 0   | 0      | G |
| 13 | BICF2P735658            | 42980628 | A | 0   | 0      | G |
| 13 | BICF2S23022214          | 42995144 | A | 0.5 | 0.7857 | G |
| 13 | TIGRP2P177314_rs8756278 | 43031165 | A | 0   | 0      | G |
| 13 | BICF2P1145625           | 43032310 | A | 1   | 1      | G |
| 13 | BICF2P260206            | 43042519 | A | 1   | 1      | G |

|    |                         |          |   |     |        |   |
|----|-------------------------|----------|---|-----|--------|---|
| 13 | BICF2P6471              | 43044117 | G | 0   | 0      | A |
| 13 | TIGRP2P177320_rs9083931 | 43044763 | A | 0   | 0      | G |
| 13 | BICF2P156180            | 43057639 | 0 | 0   | 0      | G |
| 13 | BICF2S23638301          | 43075170 | A | 0   | 0      | G |
| 13 | BICF2P17083             | 43086046 | A | 1   | 1      | G |
| 13 | BICF2P568489            | 43097972 | A | 0   | 0      | G |
| 13 | BICF2P149224            | 43113230 | G | 0   | 0      | A |
| 13 | TIGRP2P177348_rs8797119 | 43122510 | A | 0   | 0      | G |
| 13 | BICF2S23025533          | 43131667 | A | 0.5 | 0.7857 | C |
| 13 | BICF2P535243            | 43140133 | A | 0.5 | 0.2143 | C |
| 13 | BICF2S23016565          | 43148948 | G | 0.5 | 0.2143 | A |
| 13 | BICF2P981719            | 43159740 | A | 0.5 | 0.2143 | G |
| 13 | BICF2S23325123          | 43173507 | G | 0   | 0      | A |
| 13 | BICF2P903454            | 43182521 | G | 0.5 | 0.2143 | A |
| 13 | BICF2P620926            | 43190855 | G | 0.5 | 0.2143 | A |
| 13 | BICF2S23654183          | 43202952 | A | 0.5 | 0.2143 | G |
| 13 | BICF2P116661            | 43207294 | A | 0   | 0      | C |
| 13 | BICF2P904561            | 43220109 | A | 0   | 0      | G |
| 13 | BICF2P1384245           | 43235561 | C | 0.5 | 0.7857 | A |
| 13 | BICF2P522881            | 43240856 | G | 0   | 0      | A |
| 13 | BICF2P427339            | 43259265 | A | 0.5 | 0.2143 | G |
| 13 | BICF2P189884            | 43266523 | A | 0.5 | 0.2143 | G |
| 13 | TIGRP2P177448_rs8566464 | 43317880 | G | 0   | 0      | A |
| 13 | BICF2P1365437           | 43318393 | G | 0   | 0      | A |
| 13 | BICF2P162992            | 43330821 | 0 | 0   | 0      | A |
| 13 | TIGRP2P177453_rs9125005 | 43332656 | A | 0   | 0      | G |
| 13 | BICF2P249792            | 43343588 | A | 0.5 | 0.7857 | C |
| 13 | BICF2S23053508          | 43357766 | A | 0   | 0      | G |
| 13 | BICF2P75460             | 43386308 | G | 0.5 | 0.7857 | A |
| 13 | TIGRP2P177482_rs8508911 | 43394662 | A | 0.5 | 0.7857 | G |
| 13 | TIGRP2P177502_rs8899822 | 43406137 | G | 0.5 | 0.7857 | A |
| 13 | BICF2P583362            | 43409715 | T | 0.5 | 0.2143 | A |
| 13 | BICF2P830851            | 43422650 | G | 0   | 0      | A |
| 13 | BICF2S23626222          | 43437163 | G | 0.5 | 0.7857 | A |
| 13 | BICF2P485755            | 43461579 | A | 0   | 0      | G |
| 13 | TIGRP2P177528_rs8815039 | 43473710 | A | 0   | 0      | G |
| 13 | BICF2P580956            | 43489965 | G | 0   | 0      | A |
| 13 | BICF2P871990            | 43493714 | G | 0.5 | 0.7857 | A |
| 13 | BICF2P236867            | 43513061 | C | 0.5 | 0.2143 | A |
| 13 | BICF2P123732            | 43520795 | 0 | 0   | 0      | A |
| 13 | BICF2S22924998          | 43540160 | A | 0.5 | 0.2143 | G |
| 13 | BICF2P1152065           | 43555817 | A | 0.5 | 0.7857 | G |
| 13 | BICF2S22946888          | 43562978 | A | 0.5 | 0.7857 | G |
| 13 | BICF2P619053            | 43580023 | 0 | 0   | 0      | A |
| 13 | BICF2P260347            | 43594683 | 0 | 0   | 0      | A |
| 13 | BICF2P136267            | 43603279 | G | 0   | 0      | C |
| 13 | BICF2P982654            | 43609482 | A | 0   | 0      | G |

|    |                         |          |   |     |        |   |
|----|-------------------------|----------|---|-----|--------|---|
| 13 | TIGRP2P177606_rs8886563 | 43628471 | G | 0   | 0      | C |
| 13 | TIGRP2P177607_rs8959608 | 43631560 | C | 0   | 0      | A |
| 13 | TIGRP2P177638_rs9186531 | 43645850 | A | 1   | 1      | G |
| 13 | BICF2P651575            | 43660646 | G | 0   | 0      | A |
| 13 | BICF2P651576            | 43660665 | A | 0   | 0      | G |
| 13 | BICF2P651577            | 43660809 | A | 0   | 0      | G |
| 13 | TIGRP2P177652_rs8761175 | 43672416 | 0 | 0   | 0      | A |
| 13 | BICF2S23031137          | 43691069 | G | 0   | 0      | A |
| 13 | TIGRP2P177658_rs9056858 | 43706931 | A | 1   | 1      | C |
| 13 | BICF2S23657097          | 43717009 | A | 0   | 0      | C |
| 13 | BICF2S23032085          | 43723817 | A | 0.5 | 0.2143 | G |
| 13 | BICF2P494011            | 43753368 | A | 0   | 0      | G |
| 13 | BICF2P914877            | 43759234 | A | 0   | 0      | G |
| 13 | BICF2P463761            | 43769783 | G | 0   | 0.2857 | A |
| 13 | TIGRP2P177685_rs9054064 | 43790239 | G | 0   | 0.2857 | A |
| 13 | BICF2P472258            | 43790448 | C | 0   | 0      | A |
| 13 | TIGRP2P177688_rs9166234 | 43792759 | G | 0   | 0      | A |
| 13 | BICF2G630750421         | 43811086 | 0 | 0   | 0      | G |
| 13 | TIGRP2P177693_rs8887900 | 43817832 | A | 0   | 0.2857 | T |
| 13 | BICF2S23238406          | 43836362 | G | 0   | 0      | A |
| 13 | BICF2P554543            | 43839024 | G | 0   | 0.2857 | A |
| 13 | BICF2P21263             | 43851241 | C | 0   | 0.2857 | A |
| 13 | BICF2P507615            | 43861727 | G | 0   | 0.2857 | A |
| 13 | TIGRP2P177700_rs9144944 | 43874358 | C | 0   | 0.25   | A |
| 13 | TIGRP2P177704_rs8990242 | 43890059 | A | 0   | 0      | G |
| 13 | BICF2P1236515           | 43903490 | A | 0.5 | 0.2143 | G |
| 13 | BICF2P1277314           | 43909890 | A | 0.5 | 0.7857 | G |
| 13 | BICF2S22954976          | 43922622 | G | 0   | 0      | A |
| 13 | BICF2P1303062           | 43934015 | A | 0.5 | 0.2143 | G |
| 13 | BICF2S22929743          | 43942234 | C | 0   | 0      | A |
| 13 | BICF2S23119149          | 43955709 | G | 0   | 0      | A |
| 13 | BICF2P739887            | 43964669 | T | 0   | 0      | A |
| 13 | BICF2S23636772          | 43978625 | A | 0   | 0      | G |
| 13 | BICF2P1451478           | 43998625 | A | 0.5 | 0.5    | C |
| 13 | BICF2P1140395           | 44006480 | A | 0   | 0      | G |
| 13 | BICF2P1354597           | 44017120 | G | 0.5 | 0.5    | A |
| 13 | BICF2P950093            | 44022271 | A | 0   | 0      | C |
| 13 | BICF2P189340            | 44035743 | A | 0.5 | 0.2143 | G |
| 13 | TIGRP2P177739_rs8978320 | 44052917 | A | 0   | 0.2857 | G |
| 13 | BICF2P1146300           | 44062457 | A | 0.5 | 0.5    | G |
| 13 | BICF2S23159477          | 44070450 | A | 0   | 0      | G |
| 13 | BICF2P245432            | 44081698 | A | 0.5 | 0.2143 | G |
| 13 | BICF2P1109511           | 44099332 | A | 0.5 | 0.7857 | T |
| 13 | BICF2P42270             | 44105333 | A | 0.5 | 0.2143 | G |
| 13 | BICF2P992742            | 44108522 | A | 0.5 | 0.2143 | G |
| 13 | BICF2S22910077          | 44114130 | 0 | 0   | 0      | G |
| 13 | TIGRP2P177753_rs9108987 | 44132084 | A | 0   | 0.2857 | G |

|    |                         |          |   |     |        |   |
|----|-------------------------|----------|---|-----|--------|---|
| 13 | TIGRP2P177754_rs8977406 | 44169824 | C | 0.5 | 0.5    | A |
| 13 | BICF2P494351            | 44180077 | A | 0   | 0.2857 | G |
| 13 | BICF2P326026            | 44189149 | C | 0   | 0      | A |
| 13 | BICF2P667410            | 44197543 | G | 0.5 | 0.2143 | A |
| 13 | BICF2P664137            | 44207800 | G | 1   | 0.7143 | A |
| 13 | BICF2S23313512          | 44227864 | A | 0   | 0      | C |
| 13 | BICF2P415525            | 44236597 | A | 0   | 0.2857 | G |
| 13 | TIGRP2P177784_rs9150595 | 44247589 | G | 0.5 | 0.2143 | A |
| 13 | BICF2P452593            | 44248445 | A | 0.5 | 0.2143 | C |
| 13 | BICF2P1005812           | 44257068 | G | 0.5 | 0.5    | A |
| 13 | TIGRP2P177798_rs8954868 | 44262643 | G | 0   | 0      | A |
| 13 | BICF2P307920            | 44264038 | A | 0   | 0      | G |
| 13 | BICF2P1395223           | 44280944 | G | 0.5 | 0.1667 | A |
| 13 | BICF2P1064517           | 44299513 | 0 | 0   | 0      | G |
| 13 | BICF2P1061171           | 44314394 | A | 0.5 | 0.2143 | C |
| 13 | BICF2P1464212           | 44337393 | C | 0   | 0      | A |
| 13 | BICF2S23749111          | 44353361 | A | 0   | 0      | G |
| 13 | TIGRP2P177818_rs8939519 | 44365499 | 0 | 0   | 0      | G |
| 13 | BICF2P388113            | 44388873 | 0 | 0   | 0      | G |
| 13 | BICF2P68447             | 44393115 | 0 | 0   | 0      | A |
| 13 | BICF2S2317744           | 44413841 | G | 0   | 0      | A |
| 13 | BICF2S23614160          | 44430544 | A | 0.5 | 0.2143 | G |
| 13 | BICF2P1226058           | 44447096 | A | 1   | 1      | G |
| 13 | BICF2P1088456           | 44450169 | A | 0.5 | 0.7857 | G |
| 13 | BICF2P336637            | 44466073 | A | 0.5 | 0.2143 | G |
| 13 | BICF2P574294            | 44477293 | G | 1   | 0.7143 | A |
| 13 | BICF2S23537843          | 44492252 | A | 0   | 0      | G |
| 13 | BICF2S231206            | 44498068 | A | 1   | 0.7143 | C |
| 13 | BICF2P901052            | 44519193 | T | 0   | 0      | A |
| 13 | BICF2P1051285           | 44530968 | G | 0.5 | 0.5    | A |
| 13 | BICF2P446345            | 44541018 | G | 0   | 0      | A |
| 13 | BICF2P1171249           | 44561650 | A | 0.5 | 0.5    | G |
| 13 | BICF2S22937859          | 44562954 | A | 0.5 | 0.5    | G |
| 13 | BICF2S23538140          | 44581307 | G | 0.5 | 1      | A |
| 13 | BICF2P405469            | 44587045 | A | 0   | 0      | C |
| 13 | BICF2P798354            | 44615441 | A | 0   | 0      | G |
| 13 | BICF2P1229869           | 44621816 | 0 | 0   | 0      | A |
| 13 | BICF2P467470            | 44634270 | G | 0   | 0      | A |
| 13 | BICF2P1203539           | 44648200 | A | 1   | 1      | C |
| 13 | BICF2P681088            | 44655724 | A | 0   | 0.2857 | G |
| 13 | TIGRP2P177885_rs9050443 | 44673547 | A | 0   | 0      | G |
| 13 | BICF2S23741841          | 44681402 | G | 0   | 0      | A |
| 13 | BICF2P890180            | 44697273 | G | 0   | 0      | A |
| 13 | BICF2P1171414           | 44706555 | C | 1   | 1      | A |
| 13 | BICF2P1016812           | 44712906 | A | 0   | 0      | C |
| 13 | TIGRP2P177897_rs8842388 | 44764422 | G | 0   | 0.2857 | A |
| 13 | TIGRP2P177898_rs8987358 | 44773615 | G | 0   | 0.2857 | A |

|    |                         |          |   |     |        |   |
|----|-------------------------|----------|---|-----|--------|---|
| 13 | TIGRP2P177908_rs8798976 | 44785306 | A | 0   | 0.2857 | G |
| 13 | BICF2S23718112          | 44794377 | C | 0   | 0.2857 | A |
| 13 | BICF2P704361            | 44809435 | A | 0   | 0      | G |
| 13 | BICF2P647841            | 44818724 | A | 0   | 0      | G |
| 13 | BICF2P1132037           | 44847938 | A | 0   | 0      | G |
| 13 | BICF2P1192547           | 44870466 | 0 | 0   | 0      | A |
| 13 | BICF2P359884            | 44906612 | G | 0.5 | 0.2143 | A |
| 13 | BICF2P653536            | 44915259 | A | 0.5 | 0.2143 | G |
| 13 | TIGRP2P177949_rs8835143 | 44919818 | G | 0   | 0      | A |
| 13 | TIGRP2P177958_rs9207461 | 44938459 | A | 0   | 0      | G |
| 13 | TIGRP2P177960_rs8620783 | 44949535 | G | NA  | 0.2143 | A |
| 13 | TIGRP2P177967_rs8561175 | 44959808 | G | 0   | 0      | A |
| 13 | TIGRP2P177972_rs9236801 | 44971021 | A | 0   | 0      | G |
| 13 | BICF2P1297864           | 44987699 | C | 0   | 0      | A |
| 13 | BICF2S22912191          | 45005154 | A | 0.5 | 0.2143 | G |
| 13 | TIGRP2P177989_rs9247835 | 45017782 | A | 0.5 | 0.2143 | C |
| 13 | BICF2S22949565          | 45031492 | A | 0   | 0      | G |
| 13 | BICF2P164749            | 45038491 | A | 0   | 0      | C |
| 13 | TIGRP2P177998_rs8678476 | 45048761 | G | 0.5 | 0.2143 | A |
| 13 | TIGRP2P178016_rs8527368 | 45063103 | A | 0.5 | 0.2143 | G |
| 13 | BICF2P1421245           | 45068501 | A | 0.5 | 0.2143 | C |
| 13 | TIGRP2P178028_rs9067899 | 45083890 | G | 0   | 0      | A |
| 13 | BICF2S23740902          | 45097472 | A | 0   | 0      | G |
| 13 | BICF2P202588            | 45105702 | T | 0   | 0      | A |
| 13 | BICF2P1149487           | 45117039 | G | 0   | 0      | A |
| 13 | BICF2P558726            | 45129975 | 0 | 0   | 0      | A |
| 13 | BICF2S22932161          | 45145478 | A | 0   | 0      | G |
| 13 | TIGRP2P178047_rs8828652 | 45156992 | A | 0   | 0      | C |
| 13 | BICF2S23724316          | 45164960 | G | 0.5 | 0.2143 | A |
| 13 | BICF2S22921732          | 45183139 | A | 0.5 | 0.2143 | G |
| 13 | BICF2P118591            | 45199233 | G | 0   | 0      | A |
| 13 | BICF2P729524            | 45207346 | G | 0.5 | 0.2143 | A |
| 13 | BICF2P103302            | 45227221 | A | 0   | 0      | G |
| 13 | BICF2P109165            | 45233883 | 0 | 0   | 0      | G |
| 13 | BICF2P312935            | 45245050 | 0 | 0   | 0      | A |
| 13 | TIGRP2P178066_rs8939009 | 45263351 | 0 | 0   | 0      | G |
| 13 | BICF2S23014536          | 45266109 | G | 0   | 0.2857 | A |
| 13 | TIGRP2P178075_rs9183471 | 45284897 | G | 1   | 0.7143 | A |
| 13 | TIGRP2P178077_rs9073478 | 45292048 | A | 1   | 1      | C |
| 13 | BICF2P832405            | 45300503 | 0 | 0   | 0      | A |
| 13 | BICF2P793432            | 45314097 | 0 | 0   | 0      | A |
| 13 | BICF2P309600            | 45332721 | G | 0   | 0      | C |
| 13 | BICF2P915429            | 45339135 | G | 1   | 0.7143 | A |
| 13 | BICF2P225271            | 45346340 | C | 1   | 0.7143 | A |
| 13 | BICF2P148240            | 45363922 | A | 1   | 0.7143 | G |
| 13 | BICF2P1058474           | 45376455 | G | 1   | 1      | A |
| 13 | TIGRP2P178115_rs9030836 | 45383498 | G | 1   | 1      | A |

|    |                         |          |   |     |        |   |
|----|-------------------------|----------|---|-----|--------|---|
| 13 | BICF2P479575            | 45392304 | A | 1   | 1      | C |
| 13 | TIGRP2P178117_rs8561955 | 45402133 | A | 1   | 0.7143 | C |
| 13 | TIGRP2P178120_rs8758686 | 45414712 | G | 0   | 0      | A |
| 13 | BICF2P112625            | 45430049 | A | 0   | 0      | C |
| 13 | BICF2P659569            | 45453061 | G | 0.5 | 0.2143 | A |
| 13 | BICF2P147769            | 45466903 | G | 0   | 0      | A |
| 13 | BICF2S23127960          | 45471090 | G | 0.5 | 0.7857 | A |
| 13 | BICF2S22946599          | 45490992 | A | 0   | 0      | G |
| 13 | BICF2P1385854           | 45494408 | G | 0   | 0      | A |
| 13 | BICF2P867744            | 45512816 | A | 0   | 0      | G |
| 13 | TIGRP2P178174_rs8893980 | 45523002 | 0 | 0   | 0      | A |
| 13 | BICF2P107678            | 45530625 | A | 0   | 0      | G |
| 13 | TIGRP2P178176_rs8595869 | 45541108 | A | 0   | 0      | G |
| 13 | BICF2S23234775          | 45553696 | G | 0   | 0      | A |
| 13 | BICF2P643378            | 45571124 | C | 0   | 0      | A |
| 13 | BICF2P474090            | 45576664 | G | 0   | 0.2857 | A |
| 13 | TIGRP2P178190_rs8725420 | 45589724 | A | 0   | 0.2857 | C |
| 13 | BICF2P813928            | 45608818 | G | 0   | 0.2857 | A |
| 13 | BICF2P606831            | 45613194 | A | 0   | 0.2857 | C |
| 13 | BICF2P1371130           | 45624436 | A | 0   | 0      | G |
| 13 | BICF2P388634            | 45639025 | A | 0   | 0.2857 | T |
| 13 | BICF2S2345234           | 45648490 | A | 0   | 0.25   | G |
| 13 | BICF2P1238458           | 45657771 | G | 0   | 0.2857 | A |
| 13 | BICF2P68931             | 45670377 | A | 0   | 0.2857 | G |
| 13 | BICF2S230556            | 45709390 | G | 0   | 0.2857 | A |
| 13 | BICF2P601116            | 45716251 | 0 | 0   | 0      | G |
| 13 | BICF2P860991            | 45750239 | G | 0   | 0.2857 | A |
| 13 | TIGRP2P178230_rs8492605 | 45760180 | G | 0   | 0      | A |
| 13 | BICF2P1412592           | 45776275 | A | 0   | 0      | G |
| 13 | BICF2P854157            | 45790416 | C | 0   | 0      | A |
| 13 | BICF2P289224            | 45800526 | 0 | 0   | 0      | A |
| 13 | BICF2P539015            | 45809034 | G | 0   | 0      | A |
| 13 | TIGRP2P178239_rs9250522 | 45822132 | C | 0   | 0      | A |
| 13 | BICF2S23646271          | 45834709 | 0 | 0   | 0      | A |
| 13 | TIGRP2P178240_rs8530944 | 45841944 | G | 0   | 0.2857 | A |
| 13 | BICF2S23317261          | 45858161 | G | 1   | 0.7143 | A |
| 13 | BICF2S2458008           | 45878513 | A | 0.5 | 0.7857 | G |
| 13 | BICF2P1181050           | 45890234 | 0 | 0   | 0      | G |
| 13 | BICF2P1497812           | 45913705 | A | 0   | 0      | C |
| 13 | BICF2S23637937          | 45929652 | A | 0   | 0      | G |
| 13 | BICF2P125568            | 45931580 | A | 0   | 0.2857 | G |
| 13 | TIGRP2P178249_rs8803381 | 45948290 | C | 0   | 0      | A |
| 13 | BICF2P1162413           | 45955094 | G | 0   | 0      | A |
| 13 | BICF2P664780            | 45969053 | A | 0.5 | 0.2143 | G |
| 13 | BICF2S23764811          | 45979546 | A | 0.5 | 0.2143 | C |
| 13 | BICF2S2294506           | 46000752 | A | 0.5 | 0.5    | G |
| 13 | BICF2P55427             | 46031904 | G | 0   | 0      | A |



|    |                         |          |   |     |        |   |
|----|-------------------------|----------|---|-----|--------|---|
| 13 | BICF2P72292             | 46040323 | G | 0   | 0      | A |
| 13 | TIGRP2P178282_rs9243210 | 46048076 | C | 0   | 0      | A |
| 13 | BICF2P758459            | 46067924 | G | 0   | 0      | A |
| 13 | BICF2P1039881           | 46076733 | C | 0.5 | 0.5    | A |
| 13 | BICF2P1014026           | 46088088 | 0 | 0   | 0      | A |
| 13 | BICF2S23214479          | 46098551 | C | 0   | 0      | A |
| 13 | BICF2P1047397           | 46120437 | A | 0   | 0      | G |
| 13 | BICF2S2308840           | 46135079 | A | 0.5 | 0.2143 | G |
| 13 | BICF2P1197471           | 46149098 | A | 0.5 | 0.2143 | G |
| 13 | BICF2S23331765          | 46152604 | G | 0.5 | 0.5    | A |
| 13 | BICF2S23748303          | 46169359 | G | 0.5 | 0.2143 | A |
| 13 | BICF2P331620            | 46180588 | C | 0.5 | 0.5    | A |
| 13 | TIGRP2P178316_rs8629445 | 46184754 | A | 0.5 | 0.2857 | G |
| 13 | BICF2S23741893          | 46197897 | A | 0.5 | 0.5    | T |
| 13 | BICF2P816466            | 46209742 | G | 0.5 | 0.5    | A |
| 13 | TIGRP2P178326_rs8531817 | 46224398 | G | 0.5 | 0.5    | A |
| 13 | BICF2P38694             | 46237201 | 0 | 0   | 0      | A |
| 13 | BICF2P467680            | 46252100 | A | 0.5 | 0.2143 | G |
| 13 | BICF2P511323            | 46254178 | A | 0.5 | 0.2143 | G |
| 13 | TIGRP2P178347_rs9245632 | 46273520 | A | 0   | 0      | C |
| 13 | BICF2S2363802           | 46277000 | 0 | 0   | 0      | A |
| 13 | BICF2P397820            | 46293946 | A | 0   | 0.2857 | G |
| 13 | BICF2P1143493           | 46303892 | A | 0   | 0.2857 | G |
| 13 | TIGRP2P178352_rs9218608 | 46316529 | 0 | 0   | 0      | G |
| 13 | BICF2P163108            | 46327459 | A | 0   | 0      | G |
| 13 | BICF2P891078            | 46334923 | 0 | 0   | 0      | C |
| 13 | BICF2P541336            | 46349750 | C | 0   | 0.2857 | A |
| 13 | BICF2P581609            | 46357136 | G | 1   | 1      | A |
| 13 | TIGRP2P178378_rs9152789 | 46372924 | C | 0   | 0.2857 | A |
| 13 | BICF2P1097859           | 46382835 | A | 0   | 0      | G |
| 13 | BICF2S24117853          | 46388402 | A | 1   | 1      | G |
| 13 | BICF2S2309215           | 46394654 | G | 1   | 1      | A |
| 13 | BICF2P572073            | 46404802 | A | 1   | 0.75   | G |
| 13 | BICF2P787726            | 46417832 | G | 1   | 0.7143 | A |
| 13 | BICF2P1226683           | 46426073 | A | 1   | 0.7143 | C |
| 13 | BICF2P1331681           | 46444178 | A | 0   | 0      | G |
| 13 | BICF2P588129            | 46466970 | A | 0   | 0.2857 | G |
| 13 | BICF2P891597            | 46481289 | A | 0   | 0      | G |
| 13 | BICF2P221978            | 46489639 | G | 0   | 0      | A |
| 13 | TIGRP2P178418_rs8967129 | 46494639 | A | 0   | 0      | G |
| 13 | BICF2S23425546          | 46503372 | G | 0   | 0      | A |
| 13 | TIGRP2P178429_rs8426633 | 46515011 | A | 0.5 | 0.5    | G |
| 13 | BICF2P1312981           | 46525426 | G | 0   | 0      | A |
| 13 | BICF2P419856            | 46529339 | A | 0.5 | 0.5    | G |
| 13 | BICF2P281600            | 46550176 | A | 0   | 0      | G |
| 13 | BICF2P387262            | 46562968 | A | 0   | 0      | G |
| 13 | BICF2P227942            | 46570360 | A | 0   | 0      | C |

|    |                         |          |   |     |        |   |
|----|-------------------------|----------|---|-----|--------|---|
| 13 | BICF2S23148253          | 46583022 | A | 0   | 0      | G |
| 13 | BICF2P262752            | 46587266 | A | 0   | 0      | G |
| 13 | BICF2P1468201           | 46599302 | A | 0   | 0      | G |
| 13 | BICF2P1407721           | 46610324 | 0 | 0   | 0      | A |
| 13 | BICF2P656237            | 46628964 | A | 0   | 0      | G |
| 13 | BICF2P488069            | 46640940 | A | 0.5 | 0.7857 | G |
| 13 | BICF2S23214691          | 46645639 | A | 0.5 | 0.7857 | C |
| 13 | BICF2S23438257          | 46660863 | A | 0   | 0      | G |
| 13 | TIGRP2P178483_rs9227604 | 46675513 | G | 1   | 0.7143 | A |
| 13 | BICF2P930185            | 46676935 | A | 1   | 0.7143 | G |
| 13 | TIGRP2P178488_rs9048938 | 46686055 | G | 0   | 0.2857 | A |
| 13 | BICF2P1186789           | 46688313 | A | 0   | 0.2857 | T |
| 13 | BICF2P1186792           | 46691441 | A | 0.5 | 0.5    | C |
| 13 | BICF2P878006            | 46717717 | A | 0   | 0.2857 | G |
| 13 | TIGRP2P178506_rs8734907 | 46731722 | A | 0.5 | 0.5    | G |
| 13 | BICF2S23419165          | 46737282 | A | 0   | 0      | G |
| 13 | TIGRP2P178526_rs9027779 | 46758600 | A | 0.5 | 0.5    | G |
| 13 | BICF2P1351792           | 46761562 | A | 0.5 | 0.2143 | G |
| 13 | TIGRP2P178533_rs9195626 | 46776971 | A | 0   | 0.2857 | G |
| 13 | BICF2P617282            | 46788904 | 0 | 0   | 0      | C |
| 13 | BICF2S2364440           | 46799334 | A | 0   | 0.2857 | G |
| 13 | BICF2S23160670          | 46813708 | G | 0   | 0      | A |
| 13 | BICF2G630750416         | 46821423 | 0 | 0   | 0      | G |
| 13 | BICF2P851388            | 46828626 | A | 0   | 0      | G |
| 13 | BICF2P240987            | 46844251 | C | 0.5 | 0.2143 | A |
| 13 | TIGRP2P178567_rs8598922 | 46851726 | A | 0.5 | 0.7857 | G |
| 13 | BICF2P493528            | 46862588 | A | 0.5 | 0.7857 | G |
| 13 | BICF2P336113            | 46874767 | A | 0.5 | 0.7857 | G |
| 13 | BICF2P804815            | 46892821 | G | 0.5 | 0.7857 | A |
| 13 | BICF2P1077728           | 46900968 | G | 0.5 | 0.5    | A |
| 13 | BICF2S233437            | 46917904 | A | 0.5 | 0.5    | G |
| 13 | BICF2P1095779           | 46945751 | 0 | 0   | 0      | C |
| 13 | BICF2P581298            | 46961089 | A | 0   | 0      | G |
| 13 | BICF2P601751            | 46966941 | A | 0   | 0      | G |
| 13 | TIGRP2P178593_rs8798220 | 46983830 | 0 | 0   | 0      | C |
| 13 | BICF2P61657             | 46994497 | C | 0   | 0      | A |
| 13 | BICF2S23033950          | 47020748 | A | 0.5 | 0.5    | C |
| 13 | TIGRP2P178596_rs9200965 | 47029207 | A | 1   | 1      | G |
| 13 | BICF2P435043            | 47039415 | A | 0.5 | 0.5    | G |
| 13 | BICF2P746680            | 47047389 | A | 0.5 | 0.5    | G |
| 13 | BICF2P617754            | 47066219 | A | 0   | 0      | C |
| 13 | BICF2P727083            | 47080822 | A | 1   | 1      | G |
| 13 | BICF2P1110948           | 47091478 | A | 1   | 1      | G |
| 13 | BICF2P1104386           | 47100630 | G | 0   | 0      | A |
| 13 | BICF2P416592            | 47108357 | A | 0   | 0      | C |
| 13 | BICF2P1402031           | 47136436 | A | 0   | 0      | G |
| 13 | BICF2P951522            | 47138591 | G | 0   | 0      | A |

|    |                         |          |   |     |     |   |
|----|-------------------------|----------|---|-----|-----|---|
| 13 | BICF2P665663            | 47163602 | A | 0   | 0   | G |
| 13 | BICF2P152213            | 47181222 | G | 0   | 0   | A |
| 13 | BICF2P514236            | 47201153 | G | 0   | 0   | A |
| 13 | BICF2P146450            | 47210701 | G | 0   | 0   | A |
| 13 | BICF2P1345328           | 47221121 | G | 0.5 | 0.5 | A |
| 13 | BICF2P489595            | 47231428 | A | 0.5 | 0.5 | G |
| 13 | BICF2P541680            | 47245262 | A | 0.5 | 0.5 | G |
| 13 | BICF2P519802            | 47256657 | A | 0   | 0   | G |
| 13 | TIGRP2P178638_rs8602386 | 47265351 | G | 0.5 | 0.5 | A |
| 13 | BICF2P148875            | 47280248 | A | 0.5 | 0.5 | C |
| 13 | BICF2P1446249           | 47289077 | A | 0.5 | 0.5 | C |
| 13 | BICF2P516335            | 47309297 | A | 0.5 | 0.5 | G |
| 13 | BICF2P1208098           | 47311782 | G | 0.5 | 0.5 | A |
| 13 | BICF2S23625216          | 47331998 | A | 0   | 0   | C |
| 13 | BICF2P326708            | 47338522 | G | 0.5 | 0.5 | A |
| 13 | BICF2P1175393           | 47351335 | G | 0.5 | 0.5 | A |
| 13 | TIGRP2P178652_rs8908544 | 47368066 | A | 0.5 | 0.5 | G |
| 13 | TIGRP2P178653_rs8598555 | 47376233 | G | 0.5 | 0.5 | A |
| 13 | TIGRP2P178655_rs8621118 | 47386166 | G | 0.5 | 0.5 | A |
| 13 | BICF2S22930160          | 47394066 | G | 0.5 | 0.5 | A |
| 13 | TIGRP2P178665_rs8730445 | 47406061 | C | 0.5 | 0.5 | A |
| 13 | BICF2P1036653           | 47421086 | A | 0   | 0   | C |
| 13 | BICF2S23052845          | 47427132 | A | 0.5 | 0.5 | G |
| 13 | BICF2S23028678          | 47442006 | A | 0.5 | 0.5 | T |
| 13 | TIGRP2P178681_rs9030938 | 47453694 | A | 0.5 | 0.5 | G |
| 13 | BICF2S23356477          | 47463385 | G | 0.5 | 0.5 | A |
| 13 | BICF2P444033            | 47483274 | G | 0.5 | 0.5 | A |
| 13 | TIGRP2P178694_rs9246177 | 47486218 | A | 0.5 | 0.5 | G |
| 13 | BICF2S23715331          | 47503706 | A | 0   | 0   | G |
| 13 | BICF2P72465             | 47511876 | A | 0   | 0   | G |
| 13 | TIGRP2P178701_rs8790241 | 47519500 | A | 0.5 | 0.5 | G |
| 13 | BICF2P430267            | 47563041 | A | 0   | 0   | C |
| 13 | BICF2P733071            | 47564860 | T | 1   | 1   | A |
| 13 | BICF2S23411343          | 47575701 | G | 0.5 | 0.5 | A |
| 13 | BICF2P259038            | 47593082 | A | 0   | 0   | G |
| 13 | BICF2S23441815          | 47599158 | A | 0   | 0   | G |
| 13 | BICF2S23147229          | 47612384 | A | 0   | 0   | G |
| 13 | BICF2P484977            | 47622486 | C | 0.5 | 0.5 | A |
| 13 | BICF2P1177597           | 47641930 | G | 0.5 | 0.5 | A |
| 13 | BICF2S2366910           | 47650819 | A | 0   | 0   | G |
| 13 | BICF2S2331942           | 47657353 | A | 0   | 0   | G |
| 13 | BICF2P912227            | 47671244 | G | 0.5 | 0.5 | A |
| 13 | BICF2P125057            | 47689611 | A | 0   | 0   | G |
| 13 | BICF2S23119323          | 47695319 | A | 0   | 0   | C |
| 13 | BICF2S23119324          | 47695360 | A | 0   | 0   | G |
| 13 | BICF2S23552011          | 47721524 | G | 0   | 0   | A |
| 13 | BICF2S24511502          | 47727195 | G | 0.5 | 0.5 | A |

|    |                         |          |   |     |        |   |
|----|-------------------------|----------|---|-----|--------|---|
| 13 | BICF2P1327843           | 47746312 | A | 0.5 | 0.5    | G |
| 13 | BICF2S23114974          | 47749082 | C | 0   | 0      | G |
| 13 | BICF2P1355095           | 47764023 | A | 1   | 1      | G |
| 13 | BICF2P551005            | 47781247 | C | 0   | 0      | A |
| 13 | BICF2P595617            | 47793717 | A | 0   | 0      | G |
| 13 | TIGRP2P178790_rs8758767 | 47802697 | C | 0   | 0      | A |
| 13 | BICF2P1053746           | 47802831 | G | 0   | 0      | A |
| 13 | TIGRP2P178792_rs9040705 | 47807941 | G | 0   | 0      | A |
| 13 | BICF2P346703            | 47832352 | G | 1   | 1      | A |
| 13 | BICF2G630750412         | 47847657 | A | 0   | 0      | G |
| 13 | BICF2S22921547          | 47857534 | T | 0   | 0      | A |
| 13 | TIGRP2P178816_rs9116145 | 47863495 | G | 0   | 0      | A |
| 13 | BICF2P1409948           | 47874920 | A | 0.5 | 0.5    | G |
| 13 | BICF2S23245641          | 47893468 | G | 0.5 | 0.5    | A |
| 13 | BICF2P772580            | 47902493 | A | 0.5 | 0.5    | C |
| 13 | BICF2P151131            | 47916359 | A | 0.5 | 0.5    | G |
| 13 | BICF2P1244159           | 47924619 | 0 | 0   | 0      | G |
| 13 | BICF2S23226706          | 47940423 | G | 0.5 | 0.5    | C |
| 13 | BICF2S23226707          | 47940560 | A | 0.5 | 0.5    | G |
| 13 | BICF2S23235885          | 47943869 | T | 0.5 | 0.5    | A |
| 13 | BICF2P149591            | 47955284 | A | 0   | 0      | G |
| 13 | G790f64S83              | 47986262 | 0 | 0   | 0      | G |
| 13 | G790f69S203             | 47992147 | 0 | 0   | 0      | G |
| 13 | BICF2P1222105           | 48022257 | 0 | 0   | 0      | C |
| 13 | BICF2P1222102           | 48024670 | A | 0   | 0      | G |
| 13 | BICF2S2336068           | 48041879 | G | 0   | 0      | A |
| 13 | BICF2P1125800           | 48052991 | G | 0   | 0      | A |
| 13 | BICF2P171920            | 48072175 | G | 0   | 0      | A |
| 13 | BICF2S23719861          | 48090518 | G | 0.5 | 0.5    | C |
| 13 | BICF2S23629574          | 48100227 | A | 0   | 0      | G |
| 13 | BICF2S23119941          | 48130288 | G | 0   | 0      | A |
| 13 | BICF2P339137            | 48156355 | 0 | 0   | 0      | A |
| 13 | BICF2S23711229          | 48184084 | G | 0.5 | 0.5    | A |
| 13 | BICF2P1435114           | 48187563 | 0 | 0   | 0      | A |
| 13 | BICF2P598200            | 48206383 | A | 0   | 0      | G |
| 13 | TIGRP2P178849_rs8784419 | 48209087 | A | 0   | 0      | G |
| 13 | TIGRP2P178858_rs8513345 | 48224010 | 0 | 0   | 0      | A |
| 13 | TIGRP2P178872_rs8987319 | 48244735 | A | 1   | 1      | G |
| 13 | TIGRP2P178891_rs9133345 | 48263992 | G | 0   | 0      | A |
| 13 | BICF2P930225            | 48267195 | A | 0   | 0      | C |
| 13 | BICF2S23425606          | 48289350 | 0 | 0   | 0      | A |
| 13 | BICF2P1162618           | 48307202 | A | 0   | 0      | G |
| 13 | BICF2P547743            | 48312246 | G | 0.5 | 0.5    | A |
| 13 | BICF2P344713            | 48325733 | G | 0.5 | 0.2143 | A |
| 13 | BICF2P1317273           | 48348811 | G | 0   | 0      | A |
| 13 | BICF2P1432069           | 48366233 | 0 | 0   | 0      | G |
| 13 | BICF2S23519905          | 48369840 | C | 0   | 0      | A |

|    |                         |          |   |     |        |   |
|----|-------------------------|----------|---|-----|--------|---|
| 13 | BICF2P1456736           | 48388474 | G | 0   | 0      | C |
| 13 | TIGRP2P178935_rs8773810 | 48398691 | A | 0.5 | 0.7857 | G |
| 13 | BICF2S23749662          | 48406599 | G | 1   | 0.7143 | A |
| 13 | BICF2P223862            | 48415186 | A | 0.5 | 0.7143 | G |
| 13 | TIGRP2P178963_rs9152497 | 48427966 | A | 0.5 | 0.7857 | G |
| 13 | BICF2P506565            | 48439411 | G | 0.5 | 0.3333 | A |
| 13 | BICF2P219077            | 48450727 | A | 0   | 0      | G |
| 13 | BICF2P575897            | 48464257 | A | 0.5 | 0.7857 | C |
| 13 | BICF2P1266094           | 48476184 | A | 0   | 0.2857 | G |
| 13 | BICF2P1468877           | 48488930 | G | 0   | 0.2857 | A |
| 13 | BICF2P1317394           | 48504276 | A | 0.5 | 0.2143 | G |
| 13 | BICF2S23526107          | 48514482 | G | 0.5 | 0.2143 | A |
| 13 | TIGRP2P179001_rs8509344 | 48526033 | A | 0   | 0      | G |
| 13 | BICF2P802787            | 48541327 | A | 0   | 0      | G |
| 13 | TIGRP2P179007_rs9180873 | 48558301 | G | 0   | 0      | A |
| 13 | BICF2S23150657          | 48568622 | C | 0.5 | 0.7857 | A |
| 13 | BICF2S23527858          | 48583881 | G | 0.5 | 0.2143 | A |
| 13 | BICF2P309480            | 48589626 | G | 0.5 | 0.2143 | A |
| 13 | BICF2P1296608           | 48605743 | A | 0   | 0      | G |
| 13 | TIGRP2P179024_rs9202585 | 48615507 | G | 0   | 0      | A |
| 13 | TIGRP2P179028_rs9021162 | 48628881 | 0 | 0   | 0      | A |
| 13 | BICF2S23545834          | 48637844 | A | 0.5 | 0.7857 | C |
| 13 | BICF2S23421872          | 48646480 | A | 0.5 | 0.7857 | G |
| 13 | BICF2P424692            | 48658690 | G | 0   | 0      | A |
| 13 | BICF2P984880            | 48670051 | A | 0.5 | 0.7857 | G |
| 13 | BICF2S232114            | 48679538 | A | 0.5 | 0.7857 | C |
| 13 | BICF2P472215            | 48697729 | A | 0   | 0      | T |
| 13 | BICF2S23058364          | 48706636 | A | 1   | 1      | C |
| 13 | TIGRP2P179071_rs8576924 | 48714469 | C | 1   | 1      | A |
| 13 | BICF2P455499            | 48730070 | G | 1   | 1      | A |
| 13 | BICF2P786835            | 48737696 | T | 1   | 1      | A |
| 13 | TIGRP2P179093_rs9170534 | 48751544 | A | 0   | 0.2857 | G |
| 13 | TIGRP2P179110_rs9157236 | 48762433 | A | 0   | 0      | G |
| 13 | BICF2P26951             | 48771598 | A | 0   | 0      | C |
| 13 | BICF2P1216423           | 48786809 | A | 0   | 0      | G |
| 13 | BICF2P361133            | 48803027 | G | 0   | 0.2857 | A |
| 13 | TIGRP2P179139_rs8953654 | 48804141 | C | 1   | 0.7143 | A |
| 13 | TIGRP2P179143_rs8852816 | 48822130 | A | 0   | 0.2857 | G |
| 13 | BICF2P605884            | 48831651 | C | 0   | 0.2857 | A |
| 13 | BICF2S2375293           | 48843272 | G | 0   | 0      | A |
| 13 | BICF2P974245            | 48852789 | G | 0   | 0      | A |
| 13 | TIGRP2P179159_rs8388226 | 48880541 | G | 0   | 0.2857 | A |
| 13 | BICF2P95820             | 48886691 | C | 0   | 0      | A |
| 13 | BICF2P301833            | 48914504 | C | 0   | 0      | A |
| 13 | BICF2P844692            | 48928428 | A | 0   | 0      | G |
| 13 | BICF2S2313736           | 48933959 | A | 0.5 | 0.2143 | G |
| 13 | BICF2P1216158           | 48945807 | A | 0   | 0      | G |

|    |                         |          |   |     |        |   |
|----|-------------------------|----------|---|-----|--------|---|
| 13 | BICF2P1147901           | 48968604 | 0 | 0   | 0      | C |
| 13 | BICF2P1405062           | 48982892 | 0 | 0   | 0      | G |
| 13 | BICF2S23042296          | 49021098 | A | 0   | 0      | G |
| 13 | TIGRP2P179178_rs8764621 | 49042981 | G | 0.5 | 0.5    | A |
| 13 | BICF2P53477             | 49049073 | C | 1   | 0.7143 | A |
| 13 | BICF2S23619523          | 49069368 | G | 0   | 0      | A |
| 13 | BICF2S2361471           | 49073521 | 0 | 0   | 0      | G |
| 13 | BICF2S23610122          | 49089211 | 0 | 0   | 0      | A |
| 13 | BICF2P1363856           | 49095020 | G | 0.5 | 0.2143 | A |
| 13 | BICF2P1363858           | 49095856 | A | 0.5 | 0.2143 | G |
| 13 | BICF2S23430294          | 49105564 | A | 0.5 | 0.2143 | G |
| 13 | BICF2S23059333          | 49126851 | 0 | 0   | 0      | C |
| 13 | BICF2P691062            | 49129997 | 0 | 0   | 0      | A |
| 13 | TIGRP2P179215_rs9172902 | 49143048 | A | 0   | 0.25   | G |
| 13 | BICF2P1138972           | 49155284 | G | 0   | 0.2857 | A |
| 13 | BICF2P707309            | 49163119 | C | 0   | 0.2857 | A |
| 13 | BICF2P80459             | 49177447 | G | 0.5 | 0.5    | A |
| 13 | TIGRP2P179245_rs9244263 | 49201294 | A | 0   | 0.25   | G |
| 13 | BICF2S23141530          | 49220709 | A | 1   | 0.7143 | G |
| 13 | BICF2P642832            | 49239609 | 0 | 0   | 0      | C |
| 13 | BICF2P79653             | 49245298 | 0 | 0   | 0      | A |
| 13 | BICF2P935003            | 49256700 | A | 0   | 0      | G |
| 13 | BICF2P336107            | 49270093 | A | 0.5 | 0.7857 | G |
| 13 | BICF2S23022901          | 49278141 | A | 0   | 0      | G |
| 13 | BICF2P763819            | 49292270 | A | 0   | 0      | G |
| 13 | BICF2P19764             | 49310975 | G | 0   | 0      | A |
| 13 | BICF2P115358            | 49318763 | A | 0   | 0      | G |
| 13 | BICF2P561370            | 49330882 | A | 0   | 0      | G |
| 13 | BICF2S23626847          | 49335096 | A | 1   | 1      | G |
| 13 | BICF2P415719            | 49354337 | A | 0.5 | 0.5    | G |
| 13 | BICF2S2374304           | 49380088 | A | 0.5 | 0.5    | G |
| 13 | BICF2S23536721          | 49381386 | 0 | 0   | 0      | G |
| 13 | BICF2P1235392           | 49395325 | A | 1   | 0.7143 | G |
| 13 | BICF2P1157432           | 49408014 | A | 0   | 0      | G |
| 13 | BICF2S23218616          | 49420761 | A | 0   | 0      | G |
| 13 | BICF2S23716889          | 49437087 | G | 0.5 | 0.5    | A |
| 13 | BICF2P483148            | 49444080 | A | 0   | 0      | G |
| 13 | BICF2P483149            | 49444157 | A | 0   | 0      | G |
| 13 | BICF2P483151            | 49445069 | A | 0   | 0      | G |
| 13 | BICF2S2333058           | 49453637 | A | 0.5 | 0.5    | G |
| 13 | BICF2P148398            | 49467047 | A | 0.5 | 0.5    | G |
| 13 | BICF2P1289197           | 49483319 | G | 0.5 | 0.5    | A |
| 13 | TIGRP2P179351_rs8629219 | 49486059 | 0 | 0   | 0      | G |
| 13 | BICF2P198094            | 49496881 | G | 0   | 0      | A |
| 13 | BICF2P185993            | 49507730 | G | 0.5 | 0.5    | A |
| 13 | BICF2S2379312           | 49520343 | C | 0.5 | 0.5    | G |
| 13 | BICF2P994312            | 49531237 | G | 0.5 | 0.5    | A |

|    |                         |          |   |     |     |   |
|----|-------------------------|----------|---|-----|-----|---|
| 13 | TIGRP2P179359_rs8510210 | 49550535 | G | 0   | 0   | A |
| 13 | TIGRP2P179360_rs9009882 | 49554447 | 0 | 0   | 0   | G |
| 13 | BICF2P649471            | 49569604 | A | 1   | 1   | G |
| 13 | BICF2P525477            | 49579114 | 0 | 0   | 0   | C |
| 13 | BICF2S22958443          | 49594993 | A | 0.5 | 0.5 | G |
| 13 | BICF2P1295668           | 49602271 | G | 0   | 0   | A |
| 13 | BICF2S2306648           | 49605856 | A | 0   | 0   | G |
| 13 | TIGRP2P179381_rs8727275 | 49613230 | G | 0   | 0   | A |
| 13 | TIGRP2P179386_rs9158785 | 49625151 | G | 0   | 0   | A |
| 13 | BICF2S23130299          | 49640740 | A | 0   | 0   | G |
| 13 | BICF2S23647043          | 49653188 | C | 0.5 | 0.5 | A |
| 13 | TIGRP2P179391_rs8963464 | 49665147 | A | 0   | 0   | G |
| 13 | BICF2P772908            | 49672814 | C | 0   | 0   | A |
| 13 | BICF2P288393            | 49681519 | G | 0.5 | 0.5 | A |
| 13 | BICF2P288392            | 49681878 | A | 0.5 | 0.5 | G |
| 13 | BICF2S23053260          | 49689312 | A | 0.5 | 0.5 | G |
| 13 | BICF2S23752037          | 49692037 | G | 0.5 | 0.5 | A |
| 13 | BICF2P168491            | 49703167 | G | 0   | 0   | A |
| 13 | TIGRP2P179414_rs8905262 | 49717933 | A | 0   | 0   | G |
| 13 | TIGRP2P179420_rs8847436 | 49726483 | C | 0   | 0   | A |
| 13 | TIGRP2P179433_rs8615194 | 49746661 | A | 0.5 | 0.5 | G |
| 13 | TIGRP2P179441_rs8615185 | 49750274 | G | 0   | 0   | A |
| 13 | BICF2P649217            | 49764731 | A | 0   | 0   | G |
| 13 | BICF2P470247            | 49775561 | G | 0   | 0   | A |
| 13 | BICF2P309248            | 49782669 | G | 0   | 0   | A |
| 13 | TIGRP2P179444_rs9002352 | 49790252 | 0 | 0   | 0   | C |
| 13 | BICF2S23011175          | 49836578 | 0 | 0   | 0   | A |
| 13 | BICF2S23335532          | 49842712 | C | 0.5 | 0.5 | G |
| 13 | TIGRP2P179455_rs9253349 | 49871736 | A | 0   | 0   | G |
| 13 | TIGRP2P179458_rs9013331 | 49895071 | 0 | 0   | 0   | G |
| 13 | TIGRP2P179459_rs8906998 | 49909024 | A | NA  | 0   | C |
| 13 | BICF2S22956614          | 49909101 | A | 0.5 | 0.5 | G |
| 13 | TIGRP2P179463_rs9182951 | 49910239 | A | 0   | 0   | G |
| 13 | BICF2P876237            | 49932825 | A | 0   | 0   | G |
| 13 | BICF2S23740182          | 49950995 | A | 0   | 0   | G |
| 13 | BICF2P163573            | 49962767 | G | 0   | 0   | A |
| 13 | BICF2P1018050           | 49968222 | 0 | 0   | 0   | G |
| 13 | BICF2P717350            | 49982907 | C | 0   | 0   | A |
| 13 | BICF2S23046480          | 50000810 | G | 1   | 1   | A |
| 13 | BICF2P973576            | 50004368 | C | 0   | 0   | A |
| 13 | BICF2P280422            | 50013900 | A | 0   | 0   | C |
| 13 | BICF2P1199623           | 50042481 | A | 0   | 0   | G |
| 13 | BICF2P787418            | 50050926 | A | 0.5 | 0.5 | C |
| 13 | BICF2P305865            | 50067253 | G | 0   | 0   | A |
| 13 | BICF2P194314            | 50081322 | A | 0   | 0   | G |
| 13 | TIGRP2P179511_rs8554535 | 50084887 | G | 0.5 | 0.5 | A |
| 13 | TIGRP2P179517_rs8739002 | 50105103 | C | 1   | 1   | G |

|    |                         |          |   |      |        |   |
|----|-------------------------|----------|---|------|--------|---|
| 13 | BICF2S23257668          | 50107399 | G | 0.25 | 0.3571 | A |
| 13 | BICF2P991679            | 50122175 | C | 1    | 1      | A |
| 13 | BICF2P1096622           | 50131607 | A | 0.75 | 0.8571 | G |
| 13 | BICF2P1234400           | 50144417 | A | 0.75 | 0.8571 | G |
| 13 | TIGRP2P179550_rs9165489 | 50160147 | G | 0.5  | 0.5    | A |
| 13 | BICF2P1228178           | 50170856 | A | 0    | 0      | G |
| 13 | BICF2P907173            | 50174905 | A | 0    | 0      | G |
| 13 | BICF2P668932            | 50189372 | G | 0.25 | 0.1429 | A |
| 13 | BICF2P1101428           | 50199524 | A | 0.25 | 0.3571 | G |
| 13 | BICF2P1443766           | 50219632 | A | 0.25 | 0.1429 | G |
| 13 | BICF2P1085189           | 50222469 | G | 0    | 0      | A |
| 13 | BICF2P1072241           | 50235136 | A | 0.25 | 0.3571 | T |
| 13 | BICF2P1282118           | 50249297 | G | 0.5  | 0.5    | A |
| 13 | BICF2P714806            | 50262057 | G | 0.25 | 0.1429 | A |
| 13 | BICF2P893584            | 50269679 | A | 0    | 0      | G |
| 13 | BICF2P893588            | 50271375 | G | 0.5  | 0.5    | A |
| 13 | BICF2P851640            | 50274292 | A | 0    | 0      | G |
| 13 | BICF2P198489            | 50278618 | G | 0.25 | 0.1429 | A |
| 13 | BICF2P405455            | 50291953 | A | 0    | 0      | G |
| 13 | BICF2P149919            | 50293358 | G | 0    | 0      | A |
| 13 | BICF2P909717            | 50305990 | A | 0    | 0      | G |
| 13 | BICF2P757964            | 50313557 | 0 | 0    | 0      | G |
| 13 | BICF2P187509            | 50367933 | G | 0.75 | 0.6429 | A |
| 13 | BICF2S23421415          | 50375760 | G | 0.75 | 0.6429 | A |
| 13 | BICF2S23445480          | 50383385 | A | 0    | 0      | G |
| 13 | BICF2P1337841           | 50399064 | A | 0.25 | 0.1429 | G |
| 13 | BICF2P782726            | 50409489 | A | 0.25 | 0.1429 | G |
| 13 | BICF2P1361855           | 50418073 | A | 0.75 | 0.6429 | G |
| 13 | BICF2S2298754           | 50435899 | A | 0    | 0      | C |
| 13 | BICF2P408868            | 50448811 | A | 0.5  | 0.5    | G |
| 13 | BICF2P430421            | 50453446 | G | 0    | 0      | A |
| 13 | BICF2P290679            | 50465589 | 0 | 0    | 0      | A |
| 13 | BICF2P906693            | 50519659 | 0 | 0    | 0      | A |
| 13 | BICF2P94220             | 50533428 | T | 0.25 | 0.1429 | A |
| 13 | BICF2P1056767           | 50543968 | G | 0.25 | 0.1429 | A |
| 13 | BICF2P914977            | 50562617 | A | 0    | 0      | G |
| 13 | BICF2P997481            | 50569924 | T | 0    | 0      | A |
| 13 | BICF2P583123            | 50570956 | G | 0    | 0      | A |
| 13 | BICF2P520154            | 50575535 | A | 0.25 | 0.1429 | G |
| 13 | TIGRP2P179617_rs9088039 | 50582634 | 0 | 0    | 0      | A |
| 13 | BICF2P187637            | 50603169 | G | 0.25 | 0.1429 | A |
| 13 | BICF2P777375            | 50609912 | A | 0.25 | 0.1429 | G |
| 13 | BICF2P109496            | 50613526 | G | 0.25 | 0.1429 | A |
| 13 | BICF2P313686            | 50624008 | A | 0.25 | 0.1429 | C |
| 13 | BICF2P1218175           | 50649135 | C | 0.25 | 0.1429 | A |
| 13 | BICF2P911824            | 50660022 | A | 0.25 | 0.1429 | G |
| 13 | BICF2P671964            | 50670040 | A | 0.75 | 0.8571 | C |



|    |                         |          |   |      |         |   |
|----|-------------------------|----------|---|------|---------|---|
| 13 | BICF2P1286982           | 50681560 | G | 0.25 | 0.1429  | A |
| 13 | BICF2P1247173           | 50695089 | A | 0.25 | 0.1429  | G |
| 13 | BICF2P524935            | 50705689 | T | 0.25 | 0.1429  | A |
| 13 | BICF2P163294            | 50724086 | A | 0.25 | 0.1429  | G |
| 13 | BICF2P874011            | 50743730 | A | 0.25 | 0.1429  | C |
| 13 | BICF2P1195654           | 50758774 | 0 | 0    | 0       | G |
| 13 | BICF2P259812            | 50769600 | 0 | 0    | 0       | A |
| 13 | BICF2P210481            | 50782921 | G | 0    | 0       | C |
| 13 | TIGRP2P179652_rs9089908 | 50788552 | G | 0    | 0       | A |
| 13 | TIGRP2P179657_rs8695121 | 50805311 | G | 0    | 0       | A |
| 13 | BICF2P1318894           | 50808009 | A | 0    | 0       | G |
| 13 | BICF2P574724            | 50826734 | G | 0    | 0       | A |
| 13 | BICF2P1112531           | 50834245 | A | 0    | 0       | G |
| 13 | BICF2P688390            | 50845186 | A | 0    | 0       | G |
| 13 | TIGRP2P179669_rs9174819 | 50858208 | A | 0    | 0       | C |
| 13 | BICF2P1312980           | 50866242 | A | 0.25 | 0.3571  | G |
| 13 | BICF2P781511            | 50881983 | A | 0.25 | 0.3571  | G |
| 13 | BICF2P953770            | 50899706 | C | 0.25 | 0.3571  | G |
| 13 | BICF2S23716286          | 50914577 | A | 0.25 | 0.1429  | G |
| 13 | TIGRP2P179686_rs8675839 | 50925405 | A | 0    | 0       | C |
| 13 | BICF2P466085            | 50933543 | A | 0.25 | 0.3571  | C |
| 13 | BICF2P321538            | 50960315 | A | 0.25 | 0.3571  | G |
| 13 | BICF2P1329554           | 50980847 | A | 0.5  | 0.5     | G |
| 13 | BICF2P333986            | 50988978 | G | 0.5  | 0.5     | A |
| 13 | BICF2P3700              | 51001750 | A | 0    | 0       | G |
| 13 | BICF2P340069            | 51009700 | G | 0.25 | 0.1429  | C |
| 13 | TIGRP2P179697_rs9095406 | 51014516 | C | 0.25 | 0.1429  | A |
| 13 | BICF2P1153696           | 51033486 | A | 0.25 | 0.1429  | G |
| 13 | TIGRP2P179706_rs8813664 | 51042232 | G | 0.25 | 0.1429  | A |
| 13 | TIGRP2P179712_rs8707539 | 51059838 | 0 | 0    | 0       | A |
| 13 | BICF2S23759341          | 51060679 | G | 0.25 | 0.1429  | A |
| 13 | BICF2P243330            | 51091131 | 0 | 0    | 0       | G |
| 13 | TIGRP2P179727_rs9000291 | 51113430 | 0 | 0    | 0       | C |
| 13 | BICF2P1441752           | 51125583 | A | 0    | 0       | G |
| 13 | BICF2P332174            | 51139391 | G | 0.25 | 0.1429  | A |
| 13 | BICF2P478729            | 51152591 | C | 0.25 | 0.1429  | A |
| 13 | BICF2P752873            | 51168953 | A | 0.25 | 0.1429  | G |
| 13 | BICF2P345835            | 51181493 | 0 | 0    | 0       | G |
| 13 | TIGRP2P179766_rs9196444 | 51190164 | A | 0.25 | 0.08333 | C |
| 13 | TIGRP2P179769_rs9102730 | 51200266 | G | 0.25 | 0.1429  | A |
| 13 | TIGRP2P179779_rs8960393 | 51211619 | A | 0.25 | 0.1429  | T |
| 13 | BICF2P433065            | 51246757 | 0 | 0    | 0       | G |
| 13 | BICF2S2445379           | 51273802 | 0 | 0    | 0       | G |
| 13 | BICF2P687574            | 51299604 | 0 | 0    | 0       | G |
| 13 | TIGRP2P179797_rs8784325 | 51311017 | A | 0    | 0       | G |
| 13 | BICF2P1453955           | 51316819 | G | 0    | 0       | A |
| 13 | BICF2P359055            | 51329255 | T | 0    | 0       | A |

|    |                         |          |   |      |        |   |
|----|-------------------------|----------|---|------|--------|---|
| 13 | TIGRP2P179800_rs9101489 | 51348159 | C | 0    | 0      | A |
| 13 | TIGRP2P179803_rs8579984 | 51370025 | A | 0    | 0      | G |
| 13 | BICF2P306246            | 51373569 | 0 | 0    | 0      | A |
| 13 | TIGRP2P179806_rs8603862 | 51387799 | A | 0    | 0      | G |
| 13 | BICF2P142361            | 51421103 | G | 0    | 0      | A |
| 13 | BICF2P26015             | 51428216 | G | 0    | 0      | A |
| 13 | BICF2P907772            | 51440909 | A | 0    | 0      | C |
| 13 | BICF2S23647646          | 51461600 | 0 | 0    | 0      | G |
| 13 | TIGRP2P179813_rs8716261 | 51480096 | A | 0    | 0      | G |
| 13 | BICF2P246964            | 51489330 | G | 0    | 0      | A |
| 13 | BICF2P45752             | 51499946 | 0 | 0    | 0      | A |
| 13 | BICF2P516752            | 51511630 | A | 0    | 0      | G |
| 13 | TIGRP2P179826_rs9090483 | 51531240 | G | 0    | 0      | A |
| 13 | BICF2S23640989          | 51539816 | 0 | 0    | 0      | G |
| 13 | TIGRP2P179833_rs8624013 | 51552819 | C | 0    | 0      | A |
| 13 | TIGRP2P179839_rs9120030 | 51564352 | A | 0    | 0      | G |
| 13 | BICF2P378579            | 51574207 | 0 | 0    | 0      | A |
| 13 | TIGRP2P179843_rs9054664 | 51588353 | 0 | 0    | 0      | C |
| 13 | BICF2P1309021           | 51590285 | A | 0    | 0      | C |
| 13 | BICF2P43023             | 51617266 | A | 0.5  | 0.5    | G |
| 13 | BICF2S24113717          | 51626524 | A | 0.25 | 0.3333 | G |
| 13 | G791f59S169             | 51643706 | 0 | 0    | 0      | C |
| 13 | BICF2S2458764           | 51652862 | A | 0    | 0      | C |
| 13 | G792f23S221             | 51697454 | 0 | 0    | 0      | C |
| 13 | BICF2P826461            | 51726842 | 0 | 0    | 0      | G |
| 13 | BICF2P397165            | 51745760 | G | 0    | 0      | A |
| 13 | BICF2P976459            | 51755732 | A | 0.5  | 0.5    | C |
| 13 | BICF2S23051937          | 51766374 | A | 0.25 | 0.3571 | C |
| 13 | BICF2P1455054           | 51779286 | G | 0.5  | 0.5    | A |
| 13 | BICF2S23737581          | 51787491 | C | 0.5  | 0.5    | A |
| 13 | BICF2P1184781           | 51797434 | A | 0.5  | 0.5    | G |
| 13 | BICF2P1000007           | 51816695 | T | 0.5  | 0.5    | A |
| 13 | BICF2P624449            | 51825881 | A | 0.5  | 0.5    | G |
| 13 | BICF2P1198415           | 51830776 | A | 0    | 0      | C |
| 13 | BICF2S23042530          | 51842359 | G | 0.25 | 0.3571 | A |
| 13 | BICF2S2299640           | 51862503 | A | 0    | 0      | G |
| 13 | TIGRP2P179874_rs9195829 | 51865642 | C | 0.75 | 0.8571 | A |
| 13 | BICF2P1089465           | 51886294 | 0 | 0    | 0      | C |
| 13 | BICF2P735393            | 51890743 | A | 0.75 | 0.8571 | G |
| 13 | BICF2P550153            | 51902538 | G | 0.25 | 0.1429 | A |
| 13 | BICF2S23327747          | 51914355 | G | 0.25 | 0.1429 | A |
| 13 | BICF2P986611            | 51925014 | 0 | 0    | 0      | C |
| 13 | BICF2P419190            | 51934578 | A | 0.75 | 0.8571 | G |
| 13 | BICF2P127997            | 51956342 | G | 0    | 0      | A |
| 13 | BICF2P34686             | 51968367 | A | 0    | 0      | G |
| 13 | TIGRP2P179907_rs9239717 | 51969250 | G | 0.25 | 0.1429 | A |
| 13 | BICF2P635062            | 51980915 | 0 | 0    | 0      | G |

|    |                         |          |   |      |        |   |
|----|-------------------------|----------|---|------|--------|---|
| 13 | BICF2P84247             | 52017570 | G | 0.5  | 0.5    | A |
| 13 | BICF2P590645            | 52035398 | A | 0    | 0      | G |
| 13 | BICF2P898992            | 52046109 | A | 1    | 1      | G |
| 13 | BICF2P1156381           | 52052757 | A | 1    | 1      | G |
| 13 | BICF2P891981            | 52083102 | A | 0    | 0      | C |
| 13 | BICF2P759958            | 52083924 | A | 0.5  | 0.5    | G |
| 13 | BICF2P1169387           | 52100023 | A | 0.5  | 0.5    | G |
| 13 | BICF2P1169385           | 52101151 | G | 0.5  | 0.5    | A |
| 13 | TIGRP2P179981_rs8992896 | 52106653 | G | 0    | 0      | A |
| 13 | BICF2S23017646          | 52129406 | T | 0    | 0      | A |
| 13 | BICF2S23452466          | 52143721 | G | 0    | 0      | A |
| 13 | BICF2S23242411          | 52162380 | G | 0.5  | 0.5    | A |
| 13 | TIGRP2P180016_rs8592027 | 52181159 | A | 0    | 0      | G |
| 13 | TIGRP2P180023_rs8762422 | 52195991 | G | 0    | 0      | A |
| 13 | BICF2P654418            | 52199981 | G | 0    | 0      | A |
| 13 | BICF2P654417            | 52199999 | A | 0    | 0      | G |
| 13 | BICF2P1156243           | 52212805 | A | 0    | 0      | G |
| 13 | BICF2S23319793          | 52215199 | C | 0.25 | 0.3571 | A |
| 13 | TIGRP2P180039_rs9114969 | 52222909 | 0 | 0    | 0      | G |
| 13 | BICF2P227833            | 52251959 | A | 0    | 0      | C |
| 13 | BICF2P39599             | 52267477 | G | 0.25 | 0.3571 | A |
| 13 | BICF2P198547            | 52299747 | C | 0.5  | 0.5    | A |
| 13 | BICF2P470367            | 52308892 | G | 0.25 | 0.1429 | A |
| 13 | TIGRP2P180068_rs9015750 | 52336133 | G | 0.25 | 0.3571 | A |
| 13 | BICF2S23356217          | 52339910 | A | 0.25 | 0.3571 | G |
| 13 | TIGRP2P180072_rs9069538 | 52349994 | A | 0.25 | 0.3571 | G |
| 13 | BICF2S23428207          | 52368673 | C | 0.25 | 0.3571 | A |
| 13 | BICF2S235865            | 52390074 | C | 0.25 | 0.1429 | A |
| 13 | BICF2P1272688           | 52416886 | G | 0.25 | 0.3571 | A |
| 13 | BICF2P701691            | 52422285 | G | 0    | 0      | A |
| 13 | BICF2P750819            | 52430775 | A | 0    | 0      | G |
| 13 | BICF2P620798            | 52453874 | A | 0.75 | 0.8571 | C |
| 13 | BICF2S23229917          | 52463266 | 0 | 0    | 0      | C |
| 13 | BICF2S23624321          | 52474635 | C | 0    | 0      | A |
| 13 | BICF2S23733952          | 52492102 | C | 0.5  | 0.5    | A |
| 13 | BICF2S23638567          | 52499358 | A | 0    | 0      | G |
| 13 | TIGRP2P180109_rs9086113 | 52527646 | G | 0.5  | 0.5    | A |
| 13 | BICF2P419931            | 52535570 | G | 0.5  | 0.5    | A |
| 13 | BICF2P895096            | 52548235 | T | 0.25 | 0.1429 | A |
| 13 | BICF2P191309            | 52562526 | 0 | 0    | 0      | A |
| 13 | BICF2P316628            | 52570352 | A | 0    | 0      | G |
| 13 | G793f52S130             | 52606325 | G | 0    | 0      | A |
| 13 | BICF2P620060            | 52642494 | 0 | 0    | 0      | G |
| 13 | BICF2S23256959          | 52647466 | G | 0    | 0      | A |
| 13 | BICF2P513748            | 52664644 | G | 0    | 0      | A |
| 13 | BICF2P453357            | 52675362 | G | 1    | 1      | A |
| 13 | BICF2S23327421          | 52687782 | A | 0.25 | 0.3571 | G |

|    |                         |          |   |      |        |   |
|----|-------------------------|----------|---|------|--------|---|
| 13 | BICF2P656522            | 52694491 | 0 | 0    | 0      | C |
| 13 | BICF2P844722            | 52711645 | 0 | 0    | 0      | G |
| 13 | BICF2P325497            | 52720750 | A | 0.5  | 0.5    | C |
| 13 | BICF2P408098            | 52750472 | G | 0.5  | 0.5    | A |
| 13 | BICF2S23035762          | 52757625 | G | 0.5  | 0.5    | A |
| 13 | BICF2P153434            | 52758562 | A | 0.25 | 0.3571 | G |
| 13 | BICF2P84955             | 52762197 | A | 0.25 | 0.3571 | G |
| 13 | BICF2S23424892          | 52781842 | A | 0.25 | 0.3571 | G |
| 13 | BICF2P135682            | 52805144 | 0 | 0    | 0      | A |
| 13 | BICF2P1077186           | 52823970 | C | 0    | 0      | A |
| 13 | BICF2S24512199          | 52834198 | G | 0.5  | 0.5    | A |
| 13 | BICF2P397832            | 52852917 | 0 | 0    | 0      | A |
| 13 | BICF2P701098            | 52871194 | C | 0    | 0      | A |
| 13 | TIGRP2P180149_rs9154751 | 52885739 | A | 0    | 0      | T |
| 13 | BICF2S22928314          | 52885815 | C | 0    | 0      | A |
| 13 | BICF2S23312369          | 52921372 | G | 0.25 | 0.3571 | C |
| 13 | TIGRP2P180162_rs8661521 | 52923010 | A | 0    | 0      | G |
| 13 | TIGRP2P180165_rs8899935 | 52938093 | G | 0    | 0      | A |
| 13 | TIGRP2P180166_rs8993156 | 52950928 | C | 0    | 0      | A |
| 13 | TIGRP2P180168_rs8851904 | 52975222 | A | 0    | 0      | G |
| 13 | BICF2P1201080           | 52989911 | C | 0.25 | 0.1429 | A |
| 13 | BICF2P1201092           | 52992254 | C | 0.25 | 0.1429 | G |
| 13 | BICF2S2364690           | 53012910 | A | 0.25 | 0.3571 | G |
| 13 | BICF2S23443922          | 53020858 | A | 0.25 | 0.3571 | G |
| 13 | BICF2P756126            | 53039612 | A | 0    | 0      | C |
| 13 | BICF2P270660            | 53056275 | A | 0.5  | 0.5    | G |
| 13 | BICF2S2318229           | 53062668 | A | 0    | 0      | G |
| 13 | BICF2P1023290           | 53081590 | 0 | 0    | 0      | A |
| 13 | BICF2S23238768          | 53091121 | G | 0    | 0      | A |
| 13 | TIGRP2P180207_rs9164164 | 53107771 | A | 0    | 0      | G |
| 13 | BICF2S23049487          | 53126648 | A | 0.5  | 0.5    | G |
| 13 | BICF2P232892            | 53133736 | G | 0.75 | 0.8571 | A |
| 13 | BICF2P795039            | 53143610 | 0 | 0    | 0      | A |
| 13 | BICF2S23111846          | 53157790 | A | 0    | 0      | C |
| 13 | BICF2P872813            | 53166094 | G | 0    | 0.2143 | A |
| 13 | TIGRP2P180215_rs8671564 | 53180496 | A | 0    | 0      | C |
| 13 | BICF2S22931813          | 53209705 | A | 0    | 0      | C |
| 13 | BICF2S22935255          | 53213785 | C | 0    | 0      | A |
| 13 | TIGRP2P180224_rs9140962 | 53225781 | 0 | 0    | 0      | A |
| 13 | BICF2S23413066          | 53234333 | G | 0.5  | 0.2    | A |
| 13 | BICF2P1339597           | 53252286 | A | 0.25 | 0.1429 | G |
| 13 | TIGRP2P180227_rs8858448 | 53268952 | C | 0    | 0      | A |
| 13 | BICF2S23427948          | 53281740 | G | 0    | 0      | A |
| 13 | BICF2S23137176          | 53311521 | A | 0.75 | 0.8571 | C |
| 13 | TIGRP2P180236_rs8790349 | 53316101 | G | 1    | 0.8571 | A |
| 13 | BICF2S2439697           | 53329261 | A | 0.75 | 0.8571 | G |
| 13 | TIGRP2P180245_rs9178754 | 53344863 | G | 0    | 0      | A |

|    |                         |          |   |      |        |   |
|----|-------------------------|----------|---|------|--------|---|
| 13 | BICF2P380059            | 53353663 | G | 0.25 | 0.3571 | A |
| 13 | BICF2P979449            | 53367679 | C | 0.25 | 0.3571 | A |
| 13 | BICF2P98896             | 53394140 | A | 0.5  | 0.5    | G |
| 13 | TIGRP2P180266_rs8576919 | 53407384 | A | 0.75 | 0.8571 | G |
| 13 | BICF2P547388            | 53417504 | A | 0    | 0      | G |
| 13 | BICF2S23319247          | 53442018 | A | 0    | 0      | G |
| 13 | BICF2P1397195           | 53454562 | A | 0    | 0      | G |
| 13 | BICF2S23210579          | 53467597 | C | 0    | 0      | A |
| 13 | BICF2S23141338          | 53475696 | 0 | 0    | 0      | G |
| 13 | TIGRP2P180302_rs9041352 | 53489248 | C | 0    | 0      | A |
| 13 | BICF2P920225            | 53508205 | A | 0.25 | 0.3571 | G |
| 13 | BICF2S24415460          | 53511568 | A | 0    | 0      | C |
| 13 | BICF2P1204068           | 53529927 | 0 | 0    | 0      | A |
| 13 | TIGRP2P180340_rs8968920 | 53536779 | G | 0    | 0      | A |
| 13 | TIGRP2P180347_rs8562998 | 53558286 | A | 0    | 0      | C |
| 13 | BICF2P1371270           | 53559614 | G | 0    | 0      | A |
| 13 | TIGRP2P180350_rs9233369 | 53576143 | A | 0.25 | 0.1429 | G |
| 13 | BICF2P607928            | 53584644 | G | 0    | 0      | A |
| 13 | BICF2P156615            | 53592924 | C | 0    | 0      | A |
| 13 | BICF2P111103            | 53609432 | A | 0    | 0      | G |
| 13 | BICF2P516976            | 53641027 | G | 0    | 0      | A |
| 13 | BICF2S23156336          | 53648427 | A | 1    | 1      | G |
| 13 | BICF2P161743            | 53708046 | G | 0.25 | 0.1429 | A |
| 13 | BICF2P443696            | 53734156 | A | 0    | 0      | G |
| 13 | BICF2S2363442           | 53744201 | C | 0    | 0      | A |
| 13 | BICF2P788958            | 53752417 | A | 0    | 0      | G |
| 13 | BICF2P214128            | 53769617 | G | 0    | 0      | A |
| 13 | BICF2P173013            | 53779262 | G | 1    | 1      | A |
| 13 | BICF2P133801            | 53793185 | 0 | 0    | 0      | A |
| 13 | TIGRP2P180428_rs8961245 | 53805052 | G | 0    | 0      | A |
| 13 | BICF2P765376            | 53816454 | A | 0.5  | 0.5    | G |
| 13 | BICF2P55607             | 53823540 | G | 0.5  | 0.5    | A |
| 13 | TIGRP2P180443_rs9172680 | 53831902 | G | 0.5  | 0.5    | A |
| 13 | BICF2P463133            | 53845152 | A | 0.5  | 0.5    | G |
| 13 | BICF2S23151835          | 53859526 | G | 1    | 1      | A |
| 13 | BICF2S23729969          | 53869796 | A | 0    | 0      | G |
| 13 | BICF2P1057471           | 53883045 | G | 0.25 | 0.3571 | A |
| 13 | TIGRP2P180466_rs8783883 | 53895859 | G | 0.25 | 0.1429 | A |
| 13 | TIGRP2P180485_rs8645627 | 53908244 | A | 0.25 | 0.1429 | G |
| 13 | TIGRP2P180489_rs8751446 | 53919998 | T | 0.5  | 0.5    | A |
| 13 | BICF2P971887            | 53923843 | C | 0.25 | 0.3571 | G |
| 13 | BICF2P29659             | 53943414 | A | 0.25 | 0.3571 | G |
| 13 | BICF2P158492            | 53946999 | 0 | 0    | 0      | A |
| 13 | TIGRP2P180508_rs9134111 | 53974689 | G | 0.25 | 0.3333 | A |
| 13 | BICF2S23141501          | 53983613 | A | 0.5  | 0.5    | G |
| 13 | BICF2P1133961           | 53992537 | 0 | 0    | 0      | A |
| 13 | BICF2P1343313           | 54029174 | G | 0.25 | 0.3571 | A |

|    |                         |          |   |      |        |   |
|----|-------------------------|----------|---|------|--------|---|
| 13 | BICF2P1312441           | 54049430 | A | 0.25 | 0.3571 | G |
| 13 | TIGRP2P180521_rs9167535 | 54053854 | G | 0.75 | 0.6429 | A |
| 13 | BICF2P1461368           | 54065603 | A | 0    | 0      | G |
| 13 | BICF2P477929            | 54095342 | A | 0    | 0      | C |
| 13 | TIGRP2P180531_rs8792127 | 54101315 | G | 0    | 0      | A |
| 13 | BICF2S23726018          | 54118802 | A | 0    | 0      | G |
| 13 | TIGRP2P180548_rs9091511 | 54142563 | A | 0.75 | 0.8571 | G |
| 13 | TIGRP2P180561_rs8677168 | 54173475 | A | 0.25 | 0.1429 | G |
| 13 | BICF2P276524            | 54200652 | 0 | 0    | 0      | G |
| 13 | BICF2P713145            | 54221421 | 0 | 0    | 0      | G |
| 13 | TIGRP2P180576_rs9123984 | 54238383 | G | 0    | 0      | A |
| 13 | BICF2P669570            | 54252682 | 0 | 0    | 0      | T |
| 13 | BICF2S23158272          | 54261412 | T | 0    | 0      | A |
| 13 | BICF2S23239957          | 54272164 | G | 0.25 | 0.3571 | A |
| 13 | BICF2S23437260          | 54287246 | C | 0    | 0      | A |
| 13 | BICF2P1151416           | 54299608 | G | 0    | 0      | A |
| 13 | TIGRP2P180600_rs8685663 | 54306604 | A | 0    | 0      | G |
| 13 | TIGRP2P180605_rs8601291 | 54323881 | C | 0.5  | 0.5    | A |
| 13 | BICF2P1240886           | 54339230 | 0 | 0    | 0      | A |
| 13 | BICF2S23646500          | 54357898 | A | 0    | 0      | G |
| 13 | TIGRP2P180615_rs8606606 | 54368848 | 0 | 0    | 0      | G |
| 13 | TIGRP2P180619_rs8983346 | 54386403 | A | 0.5  | 0.5    | C |
| 13 | BICF2S22914357          | 54399041 | A | 0.5  | 0.5    | C |
| 13 | BICF2P134961            | 54407193 | A | 0.5  | 0.5    | G |
| 13 | TIGRP2P180632_rs9179155 | 54433431 | G | 0.75 | 0.6667 | A |
| 13 | BICF2P272263            | 54459249 | G | 0    | 0      | A |
| 13 | BICF2S23531323          | 54469462 | A | 0.75 | 0.8571 | C |
| 13 | BICF2P1235899           | 54481206 | G | 0.25 | 0.1429 | A |
| 13 | TIGRP2P180647_rs8853932 | 54488043 | A | 0    | 0      | G |
| 13 | BICF2S23120172          | 54506055 | G | 0    | 0      | A |
| 13 | BICF2P319458            | 54513420 | G | 0.25 | 0.1429 | A |
| 13 | BICF2P854067            | 54529113 | G | 0    | 0      | A |
| 13 | BICF2P440750            | 54537555 | A | 0.25 | 0.1429 | C |
| 13 | BICF2P1210901           | 54547892 | A | 0    | 0      | C |
| 13 | BICF2P299371            | 54561297 | A | 0    | 0      | G |
| 13 | BICF2P755875            | 54577668 | G | 0    | 0      | A |
| 13 | BICF2P1501067           | 54584362 | G | 0    | 0      | A |
| 13 | BICF2S23444668          | 54592474 | G | 0    | 0      | A |
| 13 | BICF2P598653            | 54611003 | C | 0    | 0      | A |
| 13 | BICF2P1184281           | 54613917 | A | 0    | 0      | G |
| 13 | TIGRP2P180692_rs9191955 | 54628860 | A | 1    | 1      | G |
| 13 | BICF2P501529            | 54646926 | A | 0    | 0      | C |
| 13 | BICF2P1211104           | 54655058 | 0 | 0    | 0      | T |
| 13 | TIGRP2P180696_rs8761405 | 54669171 | A | 0    | 0      | G |
| 13 | TIGRP2P180698_rs9014609 | 54680577 | G | 0.75 | 0.8571 | A |
| 13 | BICF2S23415389          | 54689260 | A | 0    | 0      | C |
| 13 | BICF2P568069            | 54698853 | C | 0    | 0      | A |

|    |                         |          |   |      |        |   |
|----|-------------------------|----------|---|------|--------|---|
| 13 | BICF2P316084            | 54710200 | G | 0    | 0      | A |
| 13 | BICF2S23448372          | 54717199 | G | 0    | 0      | A |
| 13 | BICF2P209438            | 54732533 | G | 0    | 0      | A |
| 13 | BICF2S22951316          | 54745310 | G | 1    | 1      | A |
| 13 | BICF2P1278010           | 54758212 | G | 0    | 0      | A |
| 13 | BICF2P1006047           | 54765153 | A | 0.75 | 0.8571 | G |
| 13 | BICF2P619937            | 54778962 | A | 0.25 | 0.1429 | G |
| 13 | BICF2P83144             | 54796008 | G | 0    | 0      | A |
| 13 | TIGRP2P180724_rs8584951 | 54805036 | A | 1    | 1      | G |
| 13 | BICF2P661760            | 54818676 | G | 0.75 | 0.8571 | A |
| 13 | TIGRP2P181431_rs8808580 | 54824187 | G | 0.5  | 0.1429 | A |
| 13 | BICF2P1424656           | 54836295 | T | 0.25 | 0.1429 | A |
| 13 | TIGRP2P181444_rs8778791 | 54843662 | A | 0.25 | 0.1429 | T |
| 13 | BICF2P438577            | 54863655 | A | 0    | 0      | G |
| 13 | BICF2P1003467           | 54867856 | A | 0    | 0      | G |
| 13 | BICF2P109594            | 54881331 | A | 0.75 | 0.8571 | G |
| 13 | TIGRP2P181467_rs9138079 | 54891975 | G | 0.25 | 0.1429 | A |
| 13 | BICF2S23143886          | 54902946 | G | 0.25 | 0.1429 | A |
| 13 | BICF2P347860            | 54916339 | G | 0.75 | 0.8571 | A |
| 13 | BICF2P1252647           | 54926366 | A | 0    | 0      | G |
| 13 | BICF2P915641            | 54936923 | G | 0.25 | 0.1429 | A |
| 13 | BICF2S23535630          | 54954890 | A | 0    | 0      | C |
| 13 | BICF2S23031189          | 54962651 | G | 0    | 0      | A |
| 13 | BICF2P1349974           | 54970570 | G | 0    | 0      | A |
| 13 | BICF2P218288            | 54990475 | A | 1    | 1      | C |
| 13 | BICF2P787380            | 54995456 | G | 0    | 0      | A |
| 13 | BICF2P236030            | 55009004 | A | 1    | 1      | G |
| 13 | BICF2P1074435           | 55016015 | A | 0    | 0      | G |
| 13 | BICF2P165152            | 55048433 | A | 0.25 | 0.1429 | G |
| 13 | BICF2P941171            | 55059378 | G | 0.75 | 0.8571 | A |
| 13 | TIGRP2P181496_rs9104060 | 55062757 | 0 | 0    | 0      | T |
| 13 | BICF2P283156            | 55082606 | 0 | 0    | 0      | A |
| 13 | BICF2P1019475           | 55087126 | 0 | 0    | 0      | A |
| 13 | BICF2S23012732          | 55115947 | A | 0    | 0      | G |
| 13 | BICF2P536933            | 55130484 | C | 0    | 0      | A |
| 13 | BICF2S23443461          | 55141534 | A | 0    | 0      | T |
| 13 | BICF2P76710             | 55143153 | A | 0.25 | 0.1429 | G |
| 13 | BICF2P1193705           | 55159348 | A | 0    | 0      | C |
| 13 | BICF2P1160716           | 55187091 | G | 0.25 | 0.1429 | A |
| 13 | BICF2S23441355          | 55196464 | A | 0    | 0      | G |
| 13 | BICF2P1378012           | 55210995 | A | 0.25 | 0.1429 | G |
| 13 | BICF2P744531            | 55215567 | A | 0    | 0      | G |
| 13 | BICF2S22957236          | 55233246 | C | 0.25 | 0.1429 | A |
| 13 | BICF2P1410867           | 55237792 | 0 | 0    | 0      | A |
| 13 | BICF2P1124589           | 55246961 | G | 0    | 0      | A |
| 13 | BICF2P1418280           | 55267336 | A | 0.25 | 0.1429 | G |
| 13 | BICF2S22948879          | 55277203 | A | 0.25 | 0.1429 | C |

|    |                         |          |   |      |         |   |
|----|-------------------------|----------|---|------|---------|---|
| 13 | BICF2P226247            | 55288879 | C | 0.25 | 0.1429  | G |
| 13 | BICF2P103623            | 55294151 | A | 0.25 | 0.1429  | C |
| 13 | BICF2S2377246           | 55320186 | A | 0.5  | 0.5     | G |
| 13 | BICF2S23040586          | 55349879 | A | NA   | 0       | G |
| 13 | BICF2S23623441          | 55372265 | 0 | 0    | 0       | G |
| 13 | BICF2P958832            | 55378223 | 0 | 0    | 0       | A |
| 13 | BICF2P345011            | 55384372 | G | 0    | 0       | A |
| 13 | BICF2P794539            | 55396849 | A | 0    | 0       | G |
| 13 | BICF2P978443            | 55413097 | G | 0.75 | 0.8571  | A |
| 13 | BICF2S23661177          | 55418613 | G | 0    | 0       | A |
| 13 | BICF2S2304954           | 55438433 | A | 0    | 0       | C |
| 13 | BICF2S23535190          | 55445290 | G | 0    | 0       | A |
| 13 | BICF2P843818            | 55467808 | A | 0    | 0       | C |
| 13 | BICF2P1401869           | 55497986 | G | 0    | 0       | A |
| 13 | BICF2S23349760          | 55506895 | G | 0    | 0       | A |
| 13 | BICF2P1153441           | 55518793 | G | 0    | 0       | A |
| 13 | BICF2P751740            | 55522683 | A | 0.75 | 0.6429  | G |
| 13 | BICF2S23149633          | 55535045 | G | 0    | 0       | A |
| 13 | BICF2P66260             | 55547086 | G | 0    | 0       | A |
| 13 | BICF2P443367            | 55561822 | A | 0.25 | 0.1429  | G |
| 13 | BICF2S2455143           | 55571276 | 0 | 0    | 0       | C |
| 13 | BICF2S2312326           | 55581610 | A | 0.25 | 0.08333 | G |
| 13 | BICF2S23317487          | 55608235 | G | 0.25 | 0.3571  | A |
| 13 | BICF2P811239            | 55622153 | 0 | 0    | 0       | C |
| 13 | BICF2S23141015          | 55635189 | A | 0.25 | 0.3571  | G |
| 13 | BICF2P91297             | 55638081 | 0 | 0    | 0       | C |
| 13 | BICF2P165678            | 55649491 | 0 | 0    | 0       | A |
| 13 | BICF2P472897            | 55671323 | A | 0.25 | 0.3571  | G |
| 13 | BICF2P643416            | 55672613 | A | 0.25 | 0.1429  | C |
| 13 | TIGRP2P181507_rs9159356 | 55701015 | C | 0.5  | 0.5     | A |
| 13 | TIGRP2P181514_rs8761639 | 55706618 | G | 1    | 1       | A |
| 13 | BICF2S23743329          | 55726621 | A | 0.75 | 0.8571  | G |
| 13 | BICF2S23748057          | 55730080 | A | 0.25 | 0.1429  | C |
| 13 | BICF2P860855            | 55750739 | C | 0    | 0       | A |
| 13 | BICF2P1349338           | 55754771 | A | 1    | 1       | G |
| 13 | BICF2P312734            | 55776797 | G | 0.75 | 0.8571  | A |
| 13 | BICF2S23642359          | 55792873 | T | 0    | 0       | A |
| 13 | TIGRP2P181531_rs8952595 | 55805065 | 0 | 0    | 0       | C |
| 13 | TIGRP2P181534_rs8815529 | 55809653 | G | 0    | 0       | A |
| 13 | TIGRP2P181543_rs9178952 | 55821586 | 0 | 0    | 0       | A |
| 13 | BICF2P148943            | 55838415 | 0 | 0    | 0       | G |
| 13 | TIGRP2P181547_rs8864133 | 55844849 | G | 0    | 0       | A |
| 13 | BICF2P1124982           | 55857043 | 0 | 0    | 0       | A |
| 13 | BICF2P463357            | 55870043 | G | 0    | 0       | A |
| 13 | BICF2P736699            | 55889002 | 0 | 0    | 0       | A |
| 13 | TIGRP2P181582_rs9080494 | 55906490 | C | 1    | 1       | A |
| 13 | TIGRP2P181586_rs8980389 | 55916095 | C | NA   | 0.5     | A |



|    |                         |          |   |      |        |   |
|----|-------------------------|----------|---|------|--------|---|
| 13 | TIGRP2P181601_rs9106368 | 55935089 | G | 0.5  | 0.5    | A |
| 13 | BICF2P676026            | 55947430 | A | 0    | 0      | G |
| 13 | TIGRP2P181615_rs8967157 | 55951009 | G | 1    | 1      | C |
| 13 | TIGRP2P181621_rs8807135 | 55969602 | A | 0.25 | 0.3571 | G |
| 13 | BICF2P969527            | 55971577 | A | 0.25 | 0.3571 | G |
| 13 | BICF2P324212            | 55985465 | G | 0.25 | 0.3571 | A |
| 13 | BICF2P1378762           | 55995049 | C | 0.25 | 0.3571 | A |
| 13 | BICF2S23060593          | 56005241 | A | 0    | 0      | G |
| 13 | BICF2P1154073           | 56018424 | O | 0    | 0      | A |
| 13 | TIGRP2P181627_rs8611904 | 56032415 | A | 0    | 0      | G |
| 13 | BICF2S23147866          | 56067552 | A | 0    | 0      | G |
| 13 | BICF2S23538315          | 56077908 | G | 0.75 | 0.8571 | A |
| 13 | BICF2S23054299          | 56087259 | G | 0.25 | 0.3571 | A |
| 13 | BICF2P1131929           | 56104380 | A | 0    | 0      | G |
| 13 | TIGRP2P181656_rs9114369 | 56113475 | O | 0    | 0      | C |
| 13 | BICF2P868810            | 56137190 | O | 0    | 0      | T |
| 13 | BICF2P184385            | 56146134 | O | 0    | 0      | A |
| 13 | BICF2S23058856          | 56155312 | G | 0.25 | 0.3571 | A |
| 13 | BICF2S23745867          | 56166011 | C | 0.75 | 0.6429 | A |
| 13 | BICF2P340273            | 56183842 | A | 0.75 | 0.6429 | T |
| 13 | BICF2P345850            | 56195508 | G | 0.25 | 0.3571 | A |
| 13 | BICF2S22933748          | 56201013 | G | 0    | 0      | A |
| 13 | BICF2P1303982           | 56218932 | A | 0.25 | 0.1429 | G |
| 13 | BICF2P1205900           | 56240163 | A | 0.5  | 0.5    | C |
| 13 | BICF2P952787            | 56246628 | G | 0    | 0      | A |
| 13 | BICF2P892557            | 56263810 | O | 0    | 0      | A |
| 13 | BICF2S23648555          | 56279227 | C | 0    | 0      | A |
| 13 | BICF2S23649712          | 56283726 | A | 0    | 0      | G |
| 13 | BICF2P513155            | 56292720 | T | 0.5  | 0.5    | A |
| 13 | G795f39S172             | 56324700 | G | 0.5  | 0.5    | A |
| 13 | BICF2S23015727          | 56353303 | A | 0    | 0      | G |
| 13 | BICF2S23616120          | 56362906 | A | 0.75 | 0.8571 | C |
| 13 | BICF2S23652354          | 56374916 | G | 0    | 0      | A |
| 13 | BICF2S23614851          | 56396275 | C | 0    | 0      | A |
| 13 | TIGRP2P181700_rs8606023 | 56409080 | O | 0    | 0      | A |
| 13 | BICF2S234298            | 56422600 | G | 0    | 0      | A |
| 13 | TIGRP2P181701_rs9163491 | 56440392 | O | 0    | 0      | T |
| 13 | BICF2S22958013          | 56451869 | A | 0    | 0      | G |
| 13 | TIGRP2P181702_rs9115729 | 56475359 | O | 0    | 0      | C |
| 13 | BICF2S229585            | 56483535 | G | 0.25 | 0.3571 | A |
| 13 | BICF2S23117851          | 56488907 | A | 0.25 | 0.3571 | C |
| 13 | BICF2S2316806           | 56506230 | A | 0.75 | 0.6667 | G |
| 13 | BICF2P359324            | 56517613 | A | 0    | 0      | G |
| 13 | BICF2S23022709          | 56528110 | A | 0.75 | 0.6429 | G |
| 13 | BICF2S23011497          | 56543770 | A | 0.25 | 0.3571 | G |
| 13 | BICF2P885595            | 56547202 | G | 0    | 0      | A |
| 13 | BICF2P638178            | 56557059 | A | 0.75 | 0.6429 | C |

|    |                         |          |   |      |        |   |
|----|-------------------------|----------|---|------|--------|---|
| 13 | BICF2S23548051          | 56573736 | A | 0    | 0      | G |
| 13 | BICF2S23116346          | 56594507 | G | 0    | 0      | A |
| 13 | TIGRP2P181705_rs8865402 | 56609888 | A | 0    | 0      | G |
| 13 | BICF2P190653            | 56616888 | C | 0.5  | 0.5    | A |
| 13 | BICF2P1305774           | 56627252 | G | 0.5  | 0.5    | A |
| 13 | BICF2P1028272           | 56638067 | C | 0    | 0      | A |
| 13 | BICF2P1334              | 56656142 | C | 0    | 0      | G |
| 13 | BICF2P1422975           | 56661751 | A | 0.25 | 0.1429 | G |
| 13 | BICF2P1273668           | 56673034 | G | 0.25 | 0.1429 | A |
| 13 | BICF2S23118801          | 56683697 | C | 0    | 0      | A |
| 13 | BICF2P339304            | 56695005 | A | 0.25 | 0.1429 | T |
| 13 | BICF2P1051878           | 56705056 | C | 0.5  | 0.5    | A |
| 13 | TIGRP2P181769_rs8797458 | 56709464 | G | 0.5  | 0.5    | A |
| 13 | TIGRP2P181778_rs9177713 | 56728314 | A | 0    | 0      | G |
| 13 | BICF2S23037292          | 56732082 | G | 0.5  | 0.5    | A |
| 13 | TIGRP2P181795_rs9073022 | 56751886 | G | 0.75 | 0.6429 | A |
| 13 | BICF2P428627            | 56754126 | G | 0.75 | 0.6429 | A |
| 13 | BICF2P1171497           | 56770101 | G | 0.5  | 0.5    | A |
| 13 | BICF2P602490            | 56778827 | G | 0.5  | 0.5    | A |
| 13 | TIGRP2P181848_rs8807382 | 56792971 | G | 0.5  | 0.5    | A |
| 13 | BICF2S23420024          | 56802394 | G | 0    | 0      | A |
| 13 | BICF2P936003            | 56824425 | A | 0    | 0.3571 | G |
| 13 | BICF2P1146299           | 56833602 | G | 0.5  | 0.5    | A |
| 13 | TIGRP2P181874_rs9169649 | 56845342 | G | 0.5  | 0.5    | A |
| 13 | BICF2P249129            | 56875149 | G | 0.25 | 0.1429 | A |
| 13 | TIGRP2P181891_rs9025936 | 56880806 | C | 0.25 | 0.1429 | A |
| 13 | BICF2P1377668           | 56898178 | A | 0.25 | 0.1429 | G |
| 13 | TIGRP2P181897_rs8655341 | 56911289 | C | 0.25 | 0.1429 | A |
| 13 | BICF2P1197790           | 56921025 | G | 0    | 0      | A |
| 13 | BICF2P1222070           | 56932038 | A | 0    | 0      | G |
| 13 | TIGRP2P181902_rs9081628 | 56984338 | 0 | 0    | 0      | G |
| 13 | TIGRP2P181919_rs8928741 | 57016169 | 0 | 0    | 0      | A |
| 13 | BICF2P822223            | 57017727 | 0 | 0    | 0      | A |
| 13 | BICF2P1354247           | 57038985 | A | 0.25 | 0.1429 | G |
| 13 | BICF2P702018            | 57047222 | A | 0    | 0      | G |
| 13 | BICF2P418364            | 57055571 | G | 0.75 | 0.6429 | A |
| 13 | BICF2P893243            | 57065498 | G | 0.75 | 0.6429 | A |
| 13 | BICF2S23529352          | 57075467 | G | 0.75 | 0.6429 | A |
| 13 | BICF2P1123237           | 57096327 | C | 0.25 | 0.1429 | A |
| 13 | TIGRP2P182001_rs8718392 | 57098535 | A | 0.25 | 0.1429 | G |
| 13 | BICF2S23513395          | 57112105 | A | 0.25 | 0.1429 | C |
| 13 | BICF2S23613064          | 57121045 | A | 0.25 | 0.1429 | G |
| 13 | BICF2S23554445          | 57137335 | A | 0    | 0      | G |
| 13 | BICF2P848905            | 57152917 | C | 0.75 | 0.6429 | A |
| 13 | BICF2S23764905          | 57156906 | A | 0    | 0      | G |
| 13 | BICF2P605557            | 57172554 | A | 0.75 | 0.6429 | T |
| 13 | BICF2S23524032          | 57179566 | A | 0    | 0      | G |

|    |                         |          |   |      |        |   |
|----|-------------------------|----------|---|------|--------|---|
| 13 | BICF2P175670            | 57199388 | G | 0    | 0      | A |
| 13 | TIGRP2P182045_rs8879670 | 57212468 | A | 0.25 | 0.1429 | C |
| 13 | TIGRP2P182046_rs9239858 | 57216566 | A | 0    | 0      | G |
| 13 | BICF2P673603            | 57225297 | A | 0.5  | 0.5    | T |
| 13 | BICF2P1144471           | 57235537 | A | 0    | 0      | G |
| 13 | BICF2S23049798          | 57254481 | A | 0    | 0      | T |
| 13 | BICF2S23049778          | 57258626 | G | 0    | 0      | A |
| 13 | BICF2P368906            | 57280980 | G | 0.25 | 0.1429 | A |
| 13 | BICF2P1092961           | 57291005 | G | 0    | 0      | A |
| 13 | BICF2P1017308           | 57295550 | A | 0    | 0      | C |
| 13 | TIGRP2P182060_rs8858247 | 57305382 | C | 0    | 0      | A |
| 13 | TIGRP2P182064_rs8800909 | 57319238 | 0 | 0    | 0      | A |
| 13 | TIGRP2P182067_rs8542300 | 57338494 | A | 0    | 0      | T |
| 13 | BICF2S23731836          | 57341057 | A | 0    | 0      | G |
| 13 | BICF2P209342            | 57365433 | C | 0    | 0      | A |
| 13 | BICF2P694928            | 57379086 | 0 | 0    | 0      | G |
| 13 | BICF2P919258            | 57385987 | G | 0.75 | 0.8571 | A |
| 13 | BICF2P838668            | 57406853 | 0 | 0    | 0      | A |
| 13 | BICF2P397356            | 57408093 | A | 0.25 | 0.3571 | G |
| 13 | BICF2P901359            | 57421730 | C | 0.5  | 0.5    | A |
| 13 | BICF2P128957            | 57434504 | A | 0.25 | 0.3571 | G |
| 13 | BICF2P713322            | 57448557 | G | 0.25 | 0.1429 | A |
| 13 | BICF2P1118426           | 57456800 | A | 0    | 0      | G |
| 13 | TIGRP2P182099_rs9021618 | 57468120 | C | 0.25 | 0.1429 | G |
| 13 | BICF2P447129            | 57480365 | 0 | 0    | 0      | A |
| 13 | BICF2P124629            | 57489952 | A | 0    | 0      | T |
| 13 | BICF2P1181555           | 57497748 | G | 0    | 0      | A |
| 13 | BICF2P445406            | 57504324 | G | 0    | 0      | A |
| 13 | BICF2P1107815           | 57515204 | A | 0    | 0      | G |
| 13 | BICF2P1026321           | 57531232 | 0 | 0    | 0      | A |
| 13 | BICF2P1292897           | 57547636 | 0 | 0    | 0      | G |
| 13 | BICF2P1034519           | 57585796 | C | 0.25 | 0.3571 | G |
| 13 | BICF2P808375            | 57592286 | A | 0    | 0      | T |
| 13 | BICF2P904679            | 57604057 | 0 | 0    | 0      | A |
| 13 | TIGRP2P182111_rs9104100 | 57633432 | G | 0    | 0      | A |
| 13 | BICF2P1362720           | 57664713 | A | 0    | 0      | G |
| 13 | BICF2P1245511           | 57691625 | A | 0    | 0      | C |
| 13 | BICF2S22931073          | 57719693 | C | 0    | 0      | A |
| 13 | BICF2P1208574           | 57737984 | 0 | 0    | 0      | G |
| 13 | BICF2P267755            | 57742792 | 0 | 0    | 0      | A |
| 13 | BICF2S23037733          | 57757055 | 0 | 0    | 0      | G |
| 13 | BICF2P843360            | 57774336 | 0 | 0    | 0      | A |
| 13 | BICF2S23011820          | 57784467 | C | 0    | 0      | A |
| 13 | BICF2P1517911           | 57796055 | 0 | 0    | 0      | A |
| 13 | BICF2P224578            | 57804309 | G | 0    | 0      | A |
| 13 | BICF2S23059258          | 57826507 | 0 | 0    | 0      | A |
| 13 | BICF2P950141            | 57834388 | G | 1    | 1      | A |

|    |                         |          |   |      |         |   |
|----|-------------------------|----------|---|------|---------|---|
| 13 | BICF2P531124            | 57846991 | A | 1    | 1       | G |
| 13 | BICF2S22949241          | 57859297 | G | 0.5  | 0.5     | A |
| 13 | TIGRP2P182143_rs8850311 | 57873193 | C | 0.25 | 0.1429  | A |
| 13 | BICF2P486406            | 57879528 | G | 0.25 | 0.1429  | A |
| 13 | BICF2S2354098           | 57901212 | A | 0.25 | 0.08333 | C |
| 13 | BICF2P41225             | 57902985 | 0 | 0    | 0       | A |
| 13 | BICF2S23141600          | 57929855 | C | 0.25 | 0.3571  | A |
| 13 | BICF2P1111024           | 57985510 | 0 | 0    | 0       | A |
| 13 | BICF2P386749            | 58003122 | G | 0    | 0       | A |
| 13 | TIGRP2P182192_rs9180328 | 58011584 | G | 0    | 0       | A |
| 13 | BICF2P266749            | 58019238 | G | 0    | 0       | A |
| 13 | BICF2P16632             | 58040567 | G | 0    | 0       | A |
| 13 | TIGRP2P182211_rs9103546 | 58053823 | A | 0    | 0       | G |
| 13 | BICF2P361025            | 58069700 | G | 0.75 | 0.8571  | A |
| 13 | BICF2P471884            | 58076826 | A | 0.5  | 0.5     | C |
| 13 | BICF2P1397100           | 58100464 | A | 0.5  | 0.5     | G |
| 13 | BICF2P1181136           | 58111464 | G | 0.5  | 0.5     | A |
| 13 | TIGRP2P182214_rs9143680 | 58140218 | A | 0.25 | 0.3571  | T |
| 13 | BICF2P1258444           | 58159319 | A | 0.5  | 0.5     | T |
| 13 | BICF2P279798            | 58180929 | 0 | 0    | 0       | A |
| 13 | BICF2P407162            | 58214427 | A | 0    | 0       | G |
| 13 | BICF2S24512033          | 58228212 | A | 0    | 0       | G |
| 13 | BICF2P262658            | 58237912 | 0 | 0    | 0       | A |
| 13 | BICF2P1282705           | 58254251 | 0 | 0    | 0       | C |
| 13 | BICF2P142533            | 58269755 | A | 0    | 0       | C |
| 13 | TIGRP2P182234_rs9144416 | 58276042 | G | 0    | 0       | A |
| 13 | BICF2P785387            | 58302287 | C | 0    | 0       | A |
| 13 | BICF2P680201            | 58308394 | G | 0    | 0       | A |
| 13 | BICF2P1306752           | 58322546 | A | 0    | 0       | G |
| 13 | BICF2P313276            | 58331341 | A | 0    | 0       | G |
| 13 | BICF2P630737            | 58343839 | 0 | 0    | 0       | G |
| 13 | BICF2S23152243          | 58354306 | C | 0.25 | 0.1429  | A |
| 13 | BICF2P489362            | 58363590 | A | 0.25 | 0.1429  | T |
| 13 | BICF2P989445            | 58397700 | G | 0    | 0       | A |
| 13 | TIGRP2P182275_rs8724707 | 58414083 | A | 0    | 0       | G |
| 13 | BICF2P915141            | 58421633 | C | 0    | 0       | A |
| 13 | TIGRP2P182308_rs8867099 | 58452844 | G | 0.25 | 0.1429  | A |
| 13 | TIGRP2P182312_rs8566412 | 58455376 | G | 0.5  | 0.5     | A |
| 13 | BICF2P125792            | 58468945 | G | 0    | 0       | A |
| 13 | BICF2S23728121          | 58484647 | A | 0.25 | 0.1429  | G |
| 13 | BICF2P818572            | 58498612 | A | 0    | 0       | G |
| 13 | TIGRP2P182354_rs8886183 | 58500630 | A | 0.25 | 0.1429  | G |
| 13 | BICF2S23746434          | 58517431 | G | 0.25 | 0.1429  | A |
| 13 | BICF2P245519            | 58528119 | G | 0.25 | 0.3571  | C |
| 13 | BICF2P110473            | 58530367 | A | 0.5  | 0.5     | G |
| 13 | BICF2P1298695           | 58538981 | T | 0.5  | 0.5     | A |
| 13 | BICF2P711787            | 58547038 | 0 | 0    | 0       | G |

|    |                         |          |   |      |        |   |
|----|-------------------------|----------|---|------|--------|---|
| 13 | BICF2P186970            | 58561948 | A | 0    | 0      | C |
| 13 | BICF2S23445075          | 58573064 | A | 0.5  | 0.5    | G |
| 13 | BICF2P639812            | 58589332 | G | 0    | 0      | A |
| 13 | TIGRP2P182402_rs8823450 | 58598998 | G | 0.5  | 0.5    | A |
| 13 | BICF2P326486            | 58609930 | A | 0.5  | 0.5    | G |
| 13 | BICF2P506712            | 58616122 | A | 0.5  | 0.5    | C |
| 13 | BICF2S2374162           | 58627957 | A | 0.25 | 0.1429 | G |
| 13 | TIGRP2P182422_rs8714571 | 58646804 | C | 0.5  | 0.5    | A |
| 13 | BICF2P1001648           | 58655326 | A | 0    | 0      | G |
| 13 | BICF2S23662024          | 58655523 | A | 0.25 | 0.3571 | G |
| 13 | BICF2P1175844           | 58664871 | A | 0    | 0      | G |
| 13 | BICF2P547766            | 58668266 | G | 0.25 | 0.3571 | A |
| 13 | TIGRP2P182451_rs8608359 | 58684477 | A | 0.75 | 0.8571 | G |
| 13 | BICF2P983506            | 58692999 | A | 0.25 | 0.1429 | G |
| 13 | BICF2S23058676          | 58704430 | G | 0.25 | 0.1429 | A |
| 13 | BICF2P1115832           | 58709064 | A | 0.5  | 0.5    | G |
| 13 | BICF2P334599            | 58729638 | A | 0    | 0      | C |
| 13 | TIGRP2P182473_rs9126511 | 58734198 | A | 0.25 | 0.3571 | G |
| 13 | TIGRP2P182486_rs8756776 | 58748831 | G | 0.25 | 0.3571 | A |
| 13 | BICF2P165682            | 58753677 | G | 0    | 0.3571 | A |
| 13 | TIGRP2P182519_rs8572037 | 58769259 | G | 0    | 0      | A |
| 13 | TIGRP2P182522_rs9211140 | 58772674 | A | 0    | 0      | C |
| 13 | BICF2P1373034           | 58783111 | A | 0    | 0      | G |
| 13 | BICF2S23423784          | 58788894 | C | 0    | 0      | A |
| 13 | BICF2P385462            | 58806790 | A | 0.5  | 0.5    | T |
| 13 | BICF2P257184            | 58827221 | 0 | 0    | 0      | A |
| 13 | BICF2P671338            | 58835427 | G | 0    | 0      | A |
| 13 | BICF2P1296552           | 58857084 | C | 0    | 0      | A |
| 13 | BICF2S23723566          | 58877157 | A | 0    | 0      | G |
| 13 | BICF2S23031026          | 58881748 | G | 0    | 0      | A |
| 13 | BICF2S23243561          | 58901834 | G | 0    | 0      | A |
| 13 | BICF2S23260853          | 58914417 | A | 0.25 | 0.3571 | C |
| 13 | BICF2S2342102           | 58916344 | G | 0.5  | 0.5    | A |
| 13 | BICF2P889472            | 58931303 | 0 | 0    | 0      | A |
| 13 | TIGRP2P182589_rs9158299 | 58939133 | G | 0    | 0      | A |
| 13 | BICF2P341846            | 58950243 | G | 0    | 0      | A |
| 13 | BICF2S23742548          | 58967129 | A | 0    | 0      | G |
| 13 | BICF2P205827            | 58983427 | G | 0.75 | 0.6429 | A |
| 13 | BICF2P690421            | 58996107 | A | 0.75 | 0.6429 | G |
| 13 | BICF2S2338198           | 59007682 | G | 0.5  | 0.5    | A |
| 13 | BICF2P190675            | 59024228 | G | 0.75 | 0.8571 | A |
| 13 | TIGRP2P182636_rs9115620 | 59031687 | G | 0    | 0      | A |
| 13 | TIGRP2P182644_rs8960755 | 59043256 | G | 0    | 0      | A |
| 13 | TIGRP2P182650_rs8612826 | 59061114 | A | 0    | 0      | G |
| 13 | BICF2P1106858           | 59064483 | A | 0    | 0      | C |
| 13 | BICF2P354858            | 59076204 | A | 0    | 0      | G |
| 13 | BICF2P574176            | 59095634 | A | 0.25 | 0.3571 | G |

|    |                         |          |   |      |        |   |
|----|-------------------------|----------|---|------|--------|---|
| 13 | BICF2P1045889           | 59108133 | C | 0.75 | 0.6429 | A |
| 13 | BICF2P1009689           | 59112846 | C | 0.75 | 0.6429 | A |
| 13 | BICF2P946252            | 59130747 | G | 0    | 0      | A |
| 13 | BICF2P637640            | 59134406 | G | 0    | 0      | A |
| 13 | BICF2S23454612          | 59148421 | C | 0.5  | 0.5    | A |
| 13 | G799f42S331             | 59177817 | A | 0    | 0      | C |
| 13 | G799f46S157             | 59179195 | A | 0.25 | 0.1429 | T |
| 13 | BICF2S23639876          | 59200811 | G | 0    | 0      | A |
| 13 | BICF2S23637991          | 59205589 | A | 0    | 0      | G |
| 13 | BICF2P916266            | 59223400 | A | 0    | 0      | C |
| 13 | BICF2P426102            | 59231429 | G | 0    | 0      | A |
| 13 | BICF2P187302            | 59247426 | 0 | 0    | 0      | A |
| 13 | BICF2P231208            | 59251171 | A | 0    | 0      | G |
| 13 | BICF2P121338            | 59262929 | G | 0    | 0      | A |
| 13 | BICF2P925148            | 59271655 | A | 0    | 0      | G |
| 13 | BICF2P692739            | 59288214 | A | 0    | 0      | G |
| 13 | BICF2P1023319           | 59296252 | A | 0    | 0      | G |
| 13 | TIGRP2P182674_rs9139627 | 59315111 | G | 0    | 0      | A |
| 13 | BICF2P1081147           | 59317846 | G | 0    | 0      | A |
| 13 | BICF2P227737            | 59334924 | A | 0.5  | 0.5    | C |
| 13 | BICF2P542365            | 59340355 | 0 | 0    | 0      | A |
| 13 | BICF2P679593            | 59362886 | A | 0    | 0      | G |
| 13 | BICF2P679592            | 59363599 | A | 0    | 0      | G |
| 13 | BICF2S23259413          | 59378736 | G | 0.5  | 0.5    | A |
| 13 | BICF2S2304081           | 59399636 | G | 0    | 0      | A |
| 13 | BICF2P1220008           | 59418619 | A | 0.5  | 0.5    | G |
| 13 | BICF2S23624550          | 59422202 | A | 0.25 | 0.3571 | G |
| 13 | BICF2S22929358          | 59435686 | A | 0    | 0      | G |
| 13 | TIGRP2P182722_rs8959336 | 59445620 | 0 | 0    | 0      | A |
| 13 | TIGRP2P182731_rs8669806 | 59456581 | A | 0.5  | 0.5    | G |
| 13 | TIGRP2P182738_rs9142718 | 59474370 | T | 0    | 0      | A |
| 13 | BICF2P1025846           | 59514492 | T | 0    | 0      | A |
| 13 | BICF2P813900            | 59532132 | 0 | 0    | 0      | A |
| 13 | BICF2P562854            | 59554233 | A | 0    | 0      | G |
| 13 | BICF2P264854            | 59558818 | T | 0    | 0      | A |
| 13 | BICF2S23426328          | 59578197 | C | 0.5  | 0.5    | A |
| 13 | BICF2P1496225           | 59583117 | G | 0.25 | 0.1429 | A |
| 13 | BICF2P107869            | 59596627 | 0 | 0    | 0      | A |
| 13 | BICF2S22941889          | 59614046 | A | 0.25 | 0.1429 | G |
| 13 | BICF2S22940988          | 59618005 | G | 0    | 0      | A |
| 13 | BICF2S23637147          | 59627669 | C | 0.75 | 0.6429 | A |
| 13 | BICF2P50583             | 59640589 | A | 0.5  | 0.6429 | G |
| 13 | BICF2P325481            | 59660717 | A | 0.25 | 0.1429 | G |
| 13 | BICF2P1406304           | 59668017 | G | 0.25 | 0.1429 | A |
| 13 | BICF2P1406302           | 59668705 | A | 0    | 0      | G |
| 13 | BICF2P1286214           | 59669640 | G | 0    | 0      | A |
| 13 | TIGRP2P182779_rs8696573 | 59684804 | A | 0.25 | 0.3571 | G |

|    |                         |          |   |      |        |   |
|----|-------------------------|----------|---|------|--------|---|
| 13 | BICF2S23260065          | 59705055 | T | 0.25 | 0.1429 | A |
| 13 | BICF2P1143091           | 59711332 | A | 0.25 | 0.1429 | G |
| 13 | BICF2P548146            | 59728976 | G | 0.25 | 0.1429 | A |
| 13 | BICF2P1328420           | 59750533 | G | 0.5  | 0.5    | C |
| 13 | BICF2P318580            | 59763698 | G | 0.75 | 0.8571 | A |
| 13 | BICF2P419841            | 59770624 | A | 0.25 | 0.1429 | G |
| 13 | BICF2P485158            | 59780037 | G | 0    | 0      | A |
| 13 | BICF2P1336518           | 59794409 | A | 0    | 0      | G |
| 13 | TIGRP2P182790_rs8734048 | 59812475 | C | 0.5  | 0.5    | A |
| 13 | BICF2P1494818           | 59834171 | C | 0    | 0      | A |
| 13 | BICF2P338122            | 59845783 | G | 0.25 | 0.1429 | A |
| 13 | BICF2S23643062          | 59850049 | G | 0.25 | 0.1429 | A |
| 13 | BICF2P10386             | 59857652 | G | 0.25 | 0.1429 | A |
| 13 | TIGRP2P182803_rs9041617 | 59878301 | A | 0    | 0      | C |
| 13 | BICF2P651249            | 59888868 | A | 0.5  | 0.5    | G |
| 13 | BICF2P1316683           | 59896374 | A | 0    | 0      | G |
| 13 | BICF2P307762            | 59911694 | G | 0    | 0      | A |
| 13 | BICF2P803208            | 59929218 | G | 0    | 0      | A |
| 13 | BICF2P1401601           | 59966091 | A | 0    | 0      | G |
| 13 | BICF2S2418124           | 59978315 | A | 0    | 0      | G |
| 13 | BICF2P1229903           | 59992339 | G | 0    | 0      | A |
| 13 | BICF2S2342642           | 60007184 | C | 0    | 0      | A |
| 13 | TIGRP2P182895_rs8696302 | 60019614 | A | 0    | 0      | G |
| 13 | TIGRP2P182896_rs8535301 | 60032383 | C | 0.75 | 0.8571 | A |
| 13 | BICF2P327664            | 60045551 | G | 0.75 | 0.8571 | A |
| 13 | BICF2P847380            | 60057713 | A | 0    | 0      | G |
| 13 | BICF2P434536            | 60072815 | C | 0.75 | 0.8571 | A |
| 13 | BICF2P545072            | 60083928 | A | 0.25 | 0.3571 | G |
| 13 | BICF2P160061            | 60087745 | G | 0.25 | 0.3571 | A |
| 13 | BICF2P1302089           | 60107421 | A | 0.75 | 0.8571 | G |
| 13 | BICF2P298415            | 60115185 | A | 0.75 | 0.8571 | G |
| 13 | BICF2P1073423           | 60128752 | A | 0.75 | 0.6429 | G |
| 13 | BICF2P457695            | 60135285 | A | 0.5  | 0.5    | G |
| 13 | BICF2P443968            | 60155837 | 0 | 0    | 0      | A |
| 13 | BICF2S2316213           | 60163980 | G | 0    | 0      | A |
| 13 | BICF2S23443603          | 60178618 | G | 0    | 0      | A |
| 13 | BICF2S23735339          | 60190161 | A | 0    | 0      | G |
| 13 | TIGRP2P182921_rs9129066 | 60191385 | C | 0.75 | 0.8571 | A |
| 13 | BICF2P224461            | 60217543 | 0 | 0    | 0      | A |
| 13 | BICF2P1237893           | 60231217 | A | 0    | 0      | G |
| 13 | BICF2S2301762           | 60241063 | A | 0.5  | 0.5    | C |
| 13 | BICF2P462301            | 60262654 | G | 0.25 | 0.3571 | A |
| 13 | BICF2P404016            | 60281016 | G | 0.25 | 0.3571 | A |
| 13 | TIGRP2P182933_rs8553122 | 60285948 | A | 1    | 1      | C |
| 13 | BICF2S23054012          | 60303588 | G | 0    | 0      | A |
| 13 | TIGRP2P182945_rs9041892 | 60317396 | G | 1    | 1      | A |
| 13 | BICF2P1169295           | 60321923 | G | 0    | 0      | A |

|    |                         |          |   |      |        |   |
|----|-------------------------|----------|---|------|--------|---|
| 13 | TIGRP2P182949_rs8724094 | 60337719 | A | 1    | 1      | G |
| 13 | BICF2P131998            | 60341932 | A | 0    | 0      | G |
| 13 | BICF2P1190172           | 60353352 | A | 0.25 | 0.1429 | G |
| 13 | BICF2S22916044          | 60365027 | A | 0    | 0      | C |
| 13 | TIGRP2P182965_rs8987621 | 60384053 | A | 0.5  | 0.5    | G |
| 13 | TIGRP2P182975_rs9250330 | 60395639 | A | 0    | 0      | G |
| 13 | BICF2S23053890          | 60402656 | C | 0    | 0      | A |
| 13 | BICF2P909761            | 60415135 | A | 0    | 0      | C |
| 13 | TIGRP2P182982_rs9223630 | 60436363 | A | 0    | 0      | G |
| 13 | BICF2P790503            | 60444491 | G | 0.25 | 0.3571 | A |
| 13 | BICF2P894741            | 60456567 | G | 0.25 | 0.3571 | C |
| 13 | BICF2P331125            | 60471053 | 0 | 0    | 0      | G |
| 13 | BICF2P601033            | 60482461 | G | 0    | 0      | A |
| 13 | BICF2P19523             | 60492610 | A | 0.25 | 0.3    | G |
| 13 | TIGRP2P183031_rs8913596 | 60508176 | A | 0    | 0      | G |
| 13 | BICF2S2352554           | 60519375 | A | 0    | 0      | G |
| 13 | BICF2S2331126           | 60532171 | A | 0    | 0      | C |
| 13 | BICF2S23150326          | 60536591 | G | 0.25 | 0.3571 | A |
| 13 | TIGRP2P183047_rs8770827 | 60553181 | G | 0.25 | 0.3571 | A |
| 13 | BICF2P919086            | 60561707 | G | 0    | 0      | A |
| 13 | BICF2P1383685           | 60572232 | A | 0    | 0      | G |
| 13 | BICF2S2295518           | 60590469 | A | 0    | 0      | G |
| 13 | TIGRP2P183075_rs8999934 | 60599531 | A | 0    | 0      | G |
| 13 | BICF2S23743474          | 60609223 | G | 0.75 | 0.6429 | A |
| 13 | BICF2P1162225           | 60617814 | A | 0    | 0      | G |
| 13 | BICF2P1031583           | 60631468 | A | 0.25 | 0.3    | G |
| 13 | TIGRP2P183096_rs8905763 | 60656297 | G | 0    | 0      | A |
| 13 | BICF2P757792            | 60663518 | A | 0.5  | 0.5    | G |
| 13 | BICF2P387890            | 60674944 | A | 0    | 0      | G |
| 13 | BICF2P610579            | 60694157 | A | 0.25 | 0.1429 | T |
| 13 | BICF2P59992             | 60700642 | A | 0.25 | 0.1429 | G |
| 13 | BICF2P429567            | 60716801 | C | 0.5  | 0.5    | A |
| 13 | BICF2P546293            | 60726903 | A | 0    | 0      | C |
| 13 | BICF2P1021135           | 60740062 | A | 0    | 0      | C |
| 13 | BICF2S235873            | 60755099 | G | 0.25 | 0.1429 | A |
| 13 | BICF2P1067223           | 60776775 | A | 0    | 0      | G |
| 13 | BICF2S23753160          | 60779021 | C | 0    | 0      | A |
| 13 | BICF2P354739            | 60800863 | A | 0.25 | 0.1429 | G |
| 13 | BICF2P594439            | 60834229 | T | 0.75 | 0.8571 | A |
| 13 | BICF2S23244748          | 60840416 | A | 0    | 0      | G |
| 13 | TIGRP2P183153_rs8584144 | 60847268 | G | 0    | 0      | A |
| 13 | BICF2P54333             | 60867459 | A | 0.75 | 0.8571 | G |
| 13 | TIGRP2P183166_rs8854582 | 60873088 | C | 0.75 | 0.8571 | A |
| 13 | BICF2P889231            | 60884944 | A | 0    | 0      | G |
| 13 | TIGRP2P183180_rs9099736 | 60892687 | A | 0    | 0      | G |
| 13 | BICF2P1299240           | 60904009 | A | 0.25 | 0.1429 | G |
| 13 | BICF2P811503            | 60915774 | G | 0    | 0      | A |



|    |                         |          |   |      |        |   |
|----|-------------------------|----------|---|------|--------|---|
| 13 | TIGRP2P183226_rs8546539 | 60944963 | A | 0.25 | 0.1429 | G |
| 13 | TIGRP2P183228_rs9056439 | 60953787 | A | 0.75 | 0.8571 | G |
| 13 | TIGRP2P183230_rs8702550 | 60964268 | C | 0.25 | 0.1429 | A |
| 13 | BICF2P164236            | 60980195 | G | 0.25 | 0.1429 | A |
| 13 | TIGRP2P183239_rs9020130 | 60986798 | A | 0.25 | 0.1429 | C |
| 13 | BICF2P1274839           | 61008767 | A | 0.25 | 0.1429 | G |
| 13 | TIGRP2P183265_rs8621835 | 61019054 | G | 0.75 | 0.8571 | C |
| 13 | BICF2G630750383         | 61041607 | A | 0.75 | 0.8571 | G |
| 13 | BICF2G630750375         | 61045726 | G | 0.75 | 0.8571 | A |
| 13 | BICF2G630750352         | 61060243 | A | 0    | 0      | G |
| 13 | BICF2G630750348         | 61065200 | G | 0    | 0      | A |
| 13 | BICF2G630750329         | 61077563 | G | 0    | 0      | A |
| 13 | BICF2P626713            | 61088666 | 0 | 0    | 0      | A |
| 13 | BICF2P838921            | 61105478 | C | 0    | 0      | A |
| 13 | BICF2G630750298         | 61116730 | A | 0    | 0      | G |
| 13 | BICF2G630750291         | 61123418 | G | 0.75 | 0.8571 | A |
| 13 | BICF2P746243            | 61144061 | 0 | 0    | 0      | A |
| 13 | BICF2G630750261         | 61167437 | C | 0.75 | 0.8571 | A |
| 13 | TIGRP2P183278_rs8602656 | 61171435 | C | 0.75 | 0.8571 | A |
| 13 | BICF2G630750252         | 61181947 | C | 0    | 0      | A |
| 13 | BICF2P1181997           | 61192539 | A | 0.75 | 0.8571 | G |
| 13 | BICF2G630750220         | 61203678 | A | 0    | 0      | G |
| 13 | BICF2S23714387          | 61216604 | G | 0.75 | 0.8571 | A |
| 13 | BICF2P919078            | 61236909 | A | 0    | 0      | G |
| 13 | BICF2G630750110         | 61240440 | G | 0.25 | 0.1429 | A |
| 13 | BICF2S23429433          | 61249613 | G | 0.25 | 0.1429 | A |
| 13 | BICF2P390891            | 61270493 | A | 0    | 0      | C |
| 13 | BICF2S22944547          | 61290600 | A | 0    | 0      | G |
| 13 | BICF2G630750105         | 61298401 | A | 0    | 0      | G |
| 13 | BICF2P374417            | 61314721 | G | 0    | 0      | A |
| 13 | BICF2S23311820          | 61322658 | G | 0    | 0      | A |
| 13 | BICF2G630750101         | 61330743 | 0 | 0    | 0      | G |
| 13 | BICF2G630750077         | 61341615 | A | 0    | 0      | G |
| 13 | BICF2G630750060         | 61356311 | A | 0    | 0      | G |
| 13 | BICF2P433117            | 61374213 | C | 0.75 | 0.8571 | G |
| 13 | BICF2G630750058         | 61380990 | G | 0    | 0      | A |
| 13 | BICF2P839024            | 61389125 | G | 0    | 0      | A |
| 13 | BICF2G630750022         | 61400294 | G | 0    | 0      | A |
| 13 | BICF2S23247948          | 61416398 | A | 0    | 0      | G |
| 13 | BICF2P618943            | 61426190 | G | 0.75 | 0.8571 | A |
| 13 | BICF2S23211424          | 61435578 | 0 | 0    | 0      | G |
| 13 | BICF2S23231438          | 61460737 | 0 | 0    | 0      | A |
| 13 | BICF2G630749974         | 61469281 | C | 0    | 0      | A |
| 13 | TIGRP2P183359_rs8637948 | 61483766 | G | 0    | 0      | A |
| 13 | BICF2P1449581           | 61496922 | C | 0.25 | 0.1429 | A |
| 13 | BICF2G630749906         | 61506953 | A | 0    | 0      | C |
| 13 | BICF2P21836             | 61519730 | A | 0    | 0      | G |

|    |                         |          |   |      |        |   |
|----|-------------------------|----------|---|------|--------|---|
| 13 | BICF2G630749831         | 61536484 | G | 0.25 | 0.1429 | A |
| 13 | BICF2G630749829         | 61538324 | G | 0.75 | 0.8571 | A |
| 13 | BICF2G630749804         | 61548284 | A | 1    | 1      | G |
| 13 | BICF2S23441183          | 61561532 | A | 0    | 0      | G |
| 13 | BICF2P448775            | 61574487 | G | 1    | 1      | A |
| 13 | TIGRP2P183368_rs8654186 | 61584616 | A | 1    | 1      | G |
| 13 | BICF2G630749775         | 61596617 | C | 0    | 0      | A |
| 13 | BICF2G630749774         | 61606485 | A | 0    | 0      | G |
| 13 | BICF2G630749747         | 61619065 | 0 | 0    | 0      | G |
| 13 | BICF2P676311            | 61628507 | G | 1    | 1      | A |
| 13 | BICF2P390540            | 61642011 | A | 0    | 0      | G |
| 13 | BICF2G630749712         | 61651518 | C | 0    | 0      | A |
| 13 | BICF2G630749695         | 61663065 | A | 0    | 0      | G |
| 13 | BICF2G630749685         | 61676185 | A | 0    | 0      | G |
| 13 | BICF2G630749648         | 61689167 | G | 0.75 | 0.8571 | A |
| 13 | BICF2P184495            | 61697945 | G | 0    | 0      | A |
| 13 | BICF2S2357520           | 61713645 | C | 0    | 0      | G |
| 13 | BICF2G630749640         | 61730525 | C | 0    | 0      | G |
| 13 | BICF2G630749637         | 61740751 | G | 0.25 | 0.1429 | A |
| 13 | BICF2G630749631         | 61746265 | G | 0    | 0      | A |
| 13 | BICF2G630749602         | 61761553 | G | 0    | 0      | A |
| 13 | BICF2G630749589         | 61773215 | G | 0    | 0      | A |
| 13 | BICF2G630749588         | 61773468 | A | 0    | 0      | C |
| 13 | BICF2S23757990          | 61779409 | A | 0    | 0      | G |
| 13 | BICF2G630749552         | 61795179 | G | 0.25 | 0.1429 | A |
| 13 | BICF2P281182            | 61810098 | C | 0.25 | 0.1429 | A |
| 13 | BICF2G630749522         | 61815414 | C | 0    | 0      | A |
| 13 | BICF2G630749505         | 61826894 | A | 0.75 | 0.8571 | C |
| 13 | BICF2S23638574          | 61881928 | G | 1    | 1      | A |
| 13 | TIGRP2P183458_rs8504132 | 61916607 | A | 0.5  | 0.5    | G |
| 13 | BICF2P1050096           | 61975428 | A | 0.75 | 0.8571 | G |
| 13 | BICF2P523645            | 61985305 | 0 | 0    | 0      | G |
| 13 | BICF2P23338             | 62011008 | 0 | 0    | 0      | A |
| 13 | TIGRP2P184171_rs8895564 | 62023045 | A | 0.75 | 0.8571 | C |
| 13 | TIGRP2P184182_rs8656985 | 62042182 | G | 0.75 | 0.8571 | A |
| 13 | BICF2P1226194           | 62043006 | 0 | 0    | 0      | G |
| 13 | BICF2S23021851          | 62068571 | A | 0    | 0      | G |
| 13 | BICF2G630749007         | 62111397 | C | 1    | 1      | G |
| 13 | BICF2S2309345           | 62115859 | C | 0    | 0      | A |
| 13 | BICF2G630748989         | 62125526 | G | 0.75 | 0.8571 | A |
| 13 | BICF2G630748960         | 62155639 | G | 0.75 | 0.8571 | A |
| 13 | BICF2G630748952         | 62158972 | A | 0    | 0      | C |
| 13 | BICF2G630748929         | 62169262 | G | 0    | 0      | A |
| 13 | BICF2G630748919         | 62184528 | A | 0.75 | 0.8571 | G |
| 13 | BICF2G630748911         | 62198451 | G | 0    | 0      | A |
| 13 | BICF2G630748887         | 62214924 | A | 0    | 0      | G |
| 13 | BICF2P593830            | 62226287 | A | 0    | 0      | G |

|    |                         |          |   |      |        |   |
|----|-------------------------|----------|---|------|--------|---|
| 13 | BICF2S2332955           | 62234646 | A | 0.25 | 0.1429 | G |
| 13 | BICF2G630748866         | 62244200 | G | 0.25 | 0.1429 | A |
| 13 | BICF2P1086057           | 62252682 | G | 0.25 | 0.1429 | A |
| 13 | BICF2G630748835         | 62270554 | C | 0    | 0      | G |
| 13 | BICF2S23157459          | 62273954 | A | 0.25 | 0.1429 | G |
| 13 | BICF2G630748820         | 62284092 | G | 0    | 0      | A |
| 13 | BICF2G630748790         | 62304510 | A | 0.5  | 0.5    | C |
| 13 | BICF2G630748785         | 62307372 | A | 0    | 0      | G |
| 13 | BICF2S2329917           | 62322280 | G | 0    | 0      | A |
| 13 | BICF2G630748734         | 62331363 | A | 0    | 0      | G |
| 13 | BICF2G630748715         | 62350537 | G | 0    | 0      | A |
| 13 | BICF2G630748713         | 62355191 | A | 0    | 0      | G |
| 13 | BICF2G630748686         | 62369408 | A | 0    | 0      | C |
| 13 | TIGRP2P184336_rs8911893 | 62381072 | A | NA   | 0.5    | G |
| 13 | BICF2G630748675         | 62393284 | G | 0.5  | 0.5    | A |
| 13 | BICF2G630748669         | 62399742 | A | 0    | 0      | G |
| 13 | TIGRP2P184359_rs9155363 | 62421619 | G | 0    | 0      | A |
| 13 | BICF2S2302107           | 62423589 | A | 0    | 0      | G |
| 13 | BICF2G630748652         | 62434429 | A | 0.5  | 0.5    | C |
| 13 | BICF2P1228094           | 62452793 | G | 0.5  | 0.4286 | A |
| 13 | BICF2G630748523         | 62485644 | G | 0.5  | 0.5    | A |
| 13 | BICF2G630748511         | 62501405 | A | 0.5  | 0.5    | G |
| 13 | BICF2G630748502         | 62508846 | G | 0.5  | 0.5    | A |
| 13 | BICF2G630748473         | 62521575 | G | 0.5  | 0.5    | A |
| 13 | BICF2G630748469         | 62532799 | G | 1    | 1      | C |
| 13 | BICF2P486096            | 62537995 | A | 0    | 0      | G |
| 13 | BICF2G630748441         | 62550646 | A | 0    | 0      | G |
| 13 | BICF2P307560            | 62565590 | A | 0    | 0      | G |
| 13 | TIGRP2P184594_rs8648398 | 62575681 | G | 1    | 1      | A |
| 13 | BICF2G630748427         | 62591014 | A | 0    | 0      | G |
| 13 | BICF2G630748424         | 62597319 | G | 0    | 0      | A |
| 13 | BICF2G630748408         | 62609967 | G | 0    | 0      | A |
| 13 | BICF2G630748383         | 62617677 | T | 0.5  | 0.5    | A |
| 13 | BICF2S23753375          | 62623305 | A | 0    | 0      | G |
| 13 | BICF2G630748375         | 62630056 | A | 0    | 0      | G |
| 13 | TIGRP2P184618_rs8813400 | 62648067 | A | 0    | 0      | C |
| 13 | BICF2G630748354         | 62648276 | A | 0.5  | 0.5    | G |
| 13 | TIGRP2P184619_rs9206630 | 62652703 | A | 0.5  | 0.5    | G |
| 13 | BICF2G630748334         | 62663747 | C | 0    | 0      | A |
| 13 | TIGRP2P184627_rs8982074 | 62676184 | A | 0    | 0      | G |
| 13 | BICF2G630748319         | 62688401 | A | 1    | 1      | G |
| 13 | BICF2G630748298         | 62702700 | A | 0    | 0      | G |
| 13 | BICF2G630748284         | 62715542 | G | 0.5  | 0.5    | A |
| 13 | BICF2G630748247         | 62735455 | G | 0    | 0      | A |
| 13 | BICF2P823103            | 62754476 | C | 0.5  | 0.5    | G |
| 13 | TIGRP2P184749_rs8903664 | 62760039 | A | 0.5  | 0.5    | G |
| 13 | BICF2P1163597           | 62777910 | G | 0    | 0      | A |

|    |                         |          |   |      |        |   |
|----|-------------------------|----------|---|------|--------|---|
| 13 | BICF2P1439983           | 62786108 | G | 0    | 0      | A |
| 13 | BICF2G630748153         | 62801065 | C | 0    | 0      | A |
| 13 | BICF2G630748147         | 62802986 | A | 0    | 0      | G |
| 13 | BICF2G630748126         | 62815331 | A | 0    | 0      | G |
| 13 | BICF2P561057            | 62835213 | C | 0.5  | 0.5    | A |
| 13 | BICF2G630748113         | 62842050 | C | 0    | 0      | A |
| 13 | TIGRP2P184775_rs8934427 | 62847629 | G | 0.5  | 0.5    | A |
| 13 | BICF2P559788            | 62861015 | G | 0    | 0      | A |
| 13 | TIGRP2P184784_rs8637716 | 62871505 | G | 0    | 0      | A |
| 13 | BICF2G630748106         | 62885752 | C | 0    | 0      | G |
| 13 | BICF2P1010835           | 62899397 | G | 0    | 0      | A |
| 13 | TIGRP2P184792_rs9220627 | 62905793 | C | 0    | 0      | A |
| 13 | BICF2P261429            | 62921621 | A | 0    | 0      | G |
| 13 | BICF2P1314283           | 62931656 | A | 0    | 0      | G |
| 13 | BICF2G630748072         | 62949222 | A | 0    | 0.2857 | G |
| 13 | BICF2G630748048         | 62962263 | A | 0    | 0      | G |
| 13 | BICF2G630748037         | 62968289 | A | 0    | 0      | G |
| 13 | BICF2G630748023         | 62977358 | A | 0    | 0.2857 | G |
| 13 | BICF2G630748005         | 62989535 | G | 0    | 0.2857 | A |
| 13 | BICF2G630747989         | 62998607 | G | 0.5  | 0.5    | A |
| 13 | BICF2S23114066          | 63011838 | C | 0.5  | 0.7857 | G |
| 13 | BICF2G630747981         | 63022902 | A | 0.5  | 0.5    | G |
| 13 | BICF2G630747978         | 63039441 | C | 0.5  | 0.2143 | A |
| 13 | BICF2S23551619          | 63043818 | G | 0    | 0      | A |
| 13 | BICF2P890262            | 63058993 | A | 0.5  | 0.7857 | G |
| 13 | BICF2G630747967         | 63067728 | A | 0.5  | 0.2143 | G |
| 13 | BICF2G630747944         | 63077512 | A | 0    | 0      | G |
| 13 | BICF2G630747923         | 63097846 | A | 0    | 0.2857 | G |
| 13 | BICF2G630747914         | 63106675 | A | 0    | 0      | G |
| 13 | BICF2P431935            | 63118879 | A | 0    | 0.2857 | G |
| 13 | BICF2P256243            | 63123731 | A | 0    | 0.2857 | C |
| 13 | BICF2G630747899         | 63143847 | G | 0    | 0.2857 | C |
| 13 | BICF2G630747887         | 63151140 | A | 0    | 0.2857 | G |
| 13 | BICF2G630747865         | 63159977 | C | 0    | 0.2857 | A |
| 13 | BICF2G630747844         | 63170403 | A | 0    | 0.2857 | G |
| 13 | BICF2G630747830         | 63182583 | A | 0    | 0.2857 | G |
| 13 | BICF2G630747816         | 63194264 | C | 0.75 | 0.7143 | A |
| 13 | BICF2G630747805         | 63205386 | G | 0.75 | 0.5    | C |
| 13 | TIGRP2P184846_rs8770806 | 63215543 | G | 0.25 | 0.5714 | C |
| 13 | BICF2G630747792         | 63235475 | A | 0.5  | 0.5    | T |
| 13 | TIGRP2P184848_rs9078751 | 63241261 | A | 0.25 | 0.2857 | G |
| 13 | BICF2S23719726          | 63252261 | G | 0    | 0      | A |
| 13 | BICF2G630747772         | 63264057 | G | 0.25 | 0.5714 | A |
| 13 | TIGRP2P184851_rs9114983 | 63275138 | G | 0.25 | 0.2143 | A |
| 13 | TIGRP2P184853_rs8673615 | 63295303 | C | 0.25 | 0.2143 | A |
| 13 | BICF2G630747732         | 63300226 | C | 0.5  | 0.7857 | G |
| 13 | BICF2G630747725         | 63316320 | G | 0.25 | 0.2857 | A |

|    |                         |          |   |      |        |   |
|----|-------------------------|----------|---|------|--------|---|
| 13 | BICF2G630747721         | 63319678 | A | 0.25 | 0.2857 | C |
| 13 | BICF2P1020992           | 63337154 | 0 | 0    | 0      | A |
| 13 | BICF2G630747706         | 63347311 | C | 0.75 | 0.5    | G |
| 13 | BICF2P940986            | 63356605 | A | 1    | 1      | G |
| 13 | BICF2S2376537           | 63370852 | G | 0.75 | 0.5    | A |
| 13 | BICF2P518390            | 63380688 | 0 | 0    | 0      | A |
| 13 | BICF2G630747691         | 63395879 | G | 0.75 | 0.5    | A |
| 13 | BICF2G630747674         | 63404103 | A | 0    | 0      | G |
| 13 | TIGRP2P184870_rs9068575 | 63413588 | A | 0    | 0      | G |
| 13 | BICF2G630747649         | 63423944 | A | 0    | 0      | G |
| 13 | BICF2G630747628         | 63435532 | A | 0    | 0      | G |
| 13 | BICF2G630747605         | 63445639 | G | 0.75 | 0.5    | A |
| 13 | BICF2G630747581         | 63462511 | G | 0    | 0      | A |
| 13 | TIGRP2P184891_rs9216324 | 63470002 | A | 0.75 | 0.5    | G |
| 13 | BICF2G630747573         | 63489132 | A | 0    | 0      | G |
| 13 | BICF2G630747563         | 63492690 | G | 0    | 0      | A |
| 13 | BICF2P267044            | 63503438 | G | 0    | 0      | A |
| 13 | BICF2P1100044           | 63505786 | A | 0.75 | 0.5    | G |
| 13 | BICF2S230785            | 63523062 | C | 0.75 | 0.5    | A |
| 13 | BICF2S230856            | 63526716 | G | 0.25 | 0.2857 | A |
| 13 | BICF2P1085220           | 63538217 | C | 0    | 0      | G |
| 13 | BICF2G630747545         | 63550934 | G | 1    | 1      | A |
| 13 | BICF2S2448414           | 63567739 | A | 0    | 0      | G |
| 13 | BICF2P702194            | 63578400 | A | 0.25 | 0.5    | G |
| 13 | BICF2G630747522         | 63590873 | G | 0.25 | 0.5    | A |
| 13 | BICF2G630747517         | 63595398 | A | 0.75 | 0.5    | G |
| 13 | BICF2S23048578          | 63606956 | 0 | 0    | 0      | G |
| 13 | BICF2G630747483         | 63618255 | A | 0    | 0      | G |
| 13 | BICF2G630747446         | 63646757 | A | 0.5  | 0.7857 | G |
| 13 | BICF2G630747429         | 63655931 | A | 0    | 0      | G |
| 13 | BICF2G630747426         | 63667714 | A | 0.25 | 0.5    | C |
| 13 | BICF2G630747391         | 63682252 | A | 0.25 | 0.2857 | G |
| 13 | BICF2G630747371         | 63689263 | A | 0.25 | 0.25   | G |
| 13 | BICF2P832521            | 63704915 | A | 0.75 | 0.5    | G |
| 13 | BICF2G630747365         | 63713090 | A | 0.5  | 0.7857 | G |
| 13 | BICF2G630747329         | 63735031 | A | 0    | 0      | C |
| 13 | BICF2G630747328         | 63738419 | A | 0    | 0      | G |
| 13 | BICF2G630747313         | 63746462 | G | 0    | 0      | A |
| 13 | BICF2P502053            | 63754930 | G | 0    | 0      | A |
| 13 | BICF2G630747282         | 63756879 | G | 0.5  | 0.2143 | A |
| 13 | BICF2G630747239         | 63777174 | G | 0.75 | 0.7143 | A |
| 13 | BICF2G630747221         | 63780255 | C | 0    | 0.125  | A |
| 13 | BICF2G630747200         | 63801509 | A | 0    | 0      | G |
| 13 | BICF2G630747197         | 63803535 | A | 0    | 0      | G |
| 13 | TIGRP2P184965_rs8996044 | 63823184 | A | 0.75 | 0.7143 | C |
| 13 | BICF2G630747173         | 63825575 | A | 0    | 0      | G |
| 13 | BICF2G630747127         | 63867722 | G | 0    | 0      | A |

|    |                         |          |   |      |        |   |
|----|-------------------------|----------|---|------|--------|---|
| 13 | BICF2G630747111         | 63873269 | G | 0    | 0      | A |
| 13 | BICF2S23032685          | 63874315 | G | 0    | 0      | A |
| 13 | BICF2G630747091         | 63887378 | G | 0.75 | 0.5    | A |
| 13 | BICF2G630747083         | 63894491 | A | 0.25 | 0.5    | G |
| 13 | BICF2G630747065         | 63913625 | A | 0.25 | 0.2857 | G |
| 13 | BICF2S23549893          | 63920486 | A | 0.25 | 0.2857 | G |
| 13 | BICF2G630747041         | 63929305 | C | 0.75 | 0.5    | A |
| 13 | BICF2G630747026         | 63950868 | G | 0    | 0      | A |
| 13 | BICF2G630747018         | 63955917 | G | 0.5  | 0.2143 | A |
| 13 | BICF2G630747001         | 63969808 | G | 0    | 0      | A |
| 13 | BICF2G630746980         | 63978324 | A | 0.25 | 0.5    | T |
| 13 | TIGRP2P184991_rs9060216 | 63993551 | A | 0.25 | 0.5    | G |
| 13 | BICF2G630746933         | 64007338 | C | 0.25 | 0.2857 | A |
| 13 | BICF2G630746931         | 64007421 | G | 0.75 | 0.7143 | A |
| 13 | BICF2G630746923         | 64015162 | A | 0.5  | 0.2143 | G |
| 13 | BICF2G630746907         | 64023734 | A | 0    | 0      | G |
| 13 | BICF2G630746904         | 64032472 | A | 0.75 | 0.7143 | G |
| 13 | TIGRP2P185011_rs8793921 | 64047032 | G | 0    | 0      | A |
| 13 | BICF2G630746851         | 64064596 | G | 0    | 0      | A |
| 13 | TIGRP2P185016_rs8744939 | 64068019 | C | 0    | 0      | A |
| 13 | BICF2P1046807           | 64078722 | G | 0    | 0      | A |
| 13 | BICF2P718195            | 64100221 | A | 0    | 0      | G |
| 13 | BICF2S23639880          | 64104713 | C | 0.25 | 0.25   | A |
| 13 | BICF2P631480            | 64123687 | A | 0    | 0      | G |
| 13 | BICF2S22910368          | 64129900 | A | 0    | 0      | G |
| 13 | BICF2S22910367          | 64130131 | C | 0.75 | 0.7143 | A |
| 13 | TIGRP2P185055_rs8399960 | 64142982 | G | 0.75 | 0.7143 | A |
| 13 | TIGRP2P185059_rs9120459 | 64148969 | G | 0.75 | 0.5    | A |
| 13 | BICF2G630746747         | 64158515 | A | 0.75 | 0.5    | G |
| 13 | TIGRP2P185072_rs9078356 | 64173176 | A | 0    | 0      | G |
| 13 | BICF2P306089            | 64186372 | C | 0    | 0      | A |
| 13 | TIGRP2P185081_rs9043975 | 64194477 | G | 0    | 0      | A |
| 13 | TIGRP2P185090_rs8834045 | 64208534 | C | 0.75 | 0.5    | A |
| 13 | BICF2S2338180           | 64216451 | G | 0.5  | 0.2143 | A |
| 13 | BICF2G630746714         | 64227500 | A | 0    | 0      | C |
| 13 | BICF2P517375            | 64240205 | A | 0    | 0      | G |
| 13 | BICF2G630746687         | 64253171 | G | 1    | 1      | A |
| 13 | BICF2G630746664         | 64263261 | A | 0    | 0      | C |
| 13 | BICF2G630746629         | 64276438 | A | 0.5  | 0.2143 | G |
| 13 | BICF2G630746596         | 64286123 | A | 0.25 | 0.2143 | C |
| 13 | BICF2G630746572         | 64296537 | 0 | 0    | 0      | G |
| 13 | TIGRP2P185124_rs9085392 | 64313644 | 0 | 0    | 0      | G |
| 13 | BICF2G630746542         | 64329533 | G | 0.25 | 0.5714 | A |
| 13 | BICF2P1045197           | 64331924 | C | 0.5  | 0.2143 | A |
| 13 | BICF2G630746522         | 64343012 | G | 0    | 0      | A |
| 13 | BICF2G630746493         | 64356364 | A | 0    | 0      | C |
| 13 | BICF2G630746463         | 64374461 | C | 0    | 0      | A |

|    |                         |          |   |      |        |   |
|----|-------------------------|----------|---|------|--------|---|
| 13 | BICF2G630746451         | 64385220 | A | 0.25 | 0.2143 | G |
| 13 | BICF2G630746416         | 64403373 | C | 1    | 1      | A |
| 13 | BICF2P1300208           | 64414020 | 0 | 0    | 0      | A |
| 13 | TIGRP2P185166_rs9217173 | 64430383 | 0 | 0    | 0      | A |
| 13 | BICF2P555379            | 64434903 | A | 0    | 0      | G |
| 13 | BICF2G630746361         | 64440797 | A | 0.25 | 0.5714 | G |
| 13 | BICF2P776843            | 64446446 | 0 | 0    | 0      | A |
| 13 | BICF2P1362415           | 64457753 | A | 0    | 0      | G |
| 13 | BICF2G630746301         | 64471848 | G | 0    | 0      | A |
| 13 | BICF2S2355385           | 64487429 | A | 0.75 | 0.4286 | C |
| 13 | BICF2G630746283         | 64498178 | A | 0    | 0      | G |
| 13 | BICF2G630746277         | 64505982 | G | 0    | 0      | A |
| 13 | BICF2P1017991           | 64517949 | A | 0    | 0      | G |
| 13 | TIGRP2P185199_rs9224553 | 64527697 | A | 0    | 0      | G |
| 13 | BICF2S23020314          | 64528065 | A | 1    | 1      | G |
| 13 | BICF2P660185            | 64543012 | 0 | 0    | 0      | A |
| 13 | BICF2P263152            | 64558551 | G | 0.5  | 0.2143 | A |
| 13 | BICF2G630746274         | 64564216 | G | 0.75 | 0.7857 | A |
| 13 | BICF2G630746243         | 64573932 | C | 0.75 | 0.7857 | A |
| 13 | BICF2G630746237         | 64584035 | A | 0    | 0      | G |
| 13 | BICF2P934691            | 64597561 | C | 0.5  | 0.1667 | A |
| 13 | BICF2S23147439          | 64607572 | A | 0.5  | 0.2143 | G |
| 13 | BICF2G630746191         | 64621586 | G | 0.25 | 0.5714 | A |
| 13 | BICF2G630746142         | 64641745 | G | 0.75 | 0.7857 | A |
| 13 | BICF2G630746107         | 64656593 | G | 0    | 0      | A |
| 13 | BICF2G630746093         | 64670759 | A | 0.25 | 0.2143 | G |
| 13 | BICF2G630746086         | 64676365 | A | 1    | 1      | G |
| 13 | BICF2G630746071         | 64688593 | G | 0.75 | 0.4286 | A |
| 13 | BICF2G630746038         | 64702067 | A | 0    | 0      | G |
| 13 | BICF2P888954            | 64718958 | A | 0.75 | 0.7857 | G |
| 13 | BICF2G630745991         | 64728191 | G | 0.5  | 0.2143 | A |
| 13 | BICF2G630745980         | 64735685 | A | 0.5  | 0.2143 | G |
| 13 | BICF2G630745928         | 64765281 | G | 0    | 0      | A |
| 13 | BICF2G630745919         | 64768151 | A | 0.25 | 0.2143 | G |
| 13 | BICF2G630745876         | 64788916 | A | 0.75 | 0.4286 | C |
| 13 | BICF2G630745860         | 64793297 | A | 0.25 | 0.2143 | C |
| 13 | BICF2G630745843         | 64803474 | G | 0.75 | 0.7857 | A |
| 13 | BICF2G630745822         | 64814045 | G | 0.75 | 0.7857 | A |
| 13 | BICF2P515417            | 64827600 | C | 0.75 | 0.7857 | G |
| 13 | BICF2P1223047           | 64847146 | 0 | 0    | 0      | A |
| 13 | BICF2G630745791         | 64858994 | A | 0    | 0      | G |
| 13 | BICF2G630745790         | 64860342 | C | 0    | 0      | A |
| 13 | BICF2G630745787         | 64872398 | A | 0    | 0      | G |
| 13 | BICF2G630745785         | 64881341 | C | 0.5  | 0.2143 | G |
| 13 | BICF2G630745784         | 64890114 | A | 0    | 0      | G |
| 13 | BICF2P600744            | 64896133 | 0 | 0    | 0      | A |
| 13 | BICF2G630745781         | 64910118 | A | 0    | 0      | G |

|    |                         |          |   |      |        |   |
|----|-------------------------|----------|---|------|--------|---|
| 13 | BICF2G630745780         | 64919995 | C | 0    | 0      | A |
| 13 | BICF2P477609            | 64931937 | T | 0    | 0      | A |
| 13 | BICF2G630745758         | 64947625 | A | 0    | 0.1667 | G |
| 13 | BICF2P715265            | 64956766 | A | 0    | 0      | C |
| 13 | BICF2G630745751         | 64966721 | G | 0.5  | 0.2143 | A |
| 13 | BICF2P855801            | 64991759 | G | 0    | 0      | A |
| 13 | TIGRP2P185273_rs9110290 | 65005832 | A | 0    | 0      | G |
| 13 | BICF2G630745711         | 65017014 | A | 0    | 0      | C |
| 13 | BICF2P1025774           | 65025033 | G | 0.25 | 0.2143 | A |
| 13 | BICF2G630745682         | 65039442 | A | 0.5  | 0.2143 | G |
| 13 | BICF2G630745668         | 65047352 | G | 0.25 | 0.5714 | A |
| 13 | BICF2G630745649         | 65058534 | G | 0.5  | 0.2143 | A |
| 13 | BICF2P1003042           | 65068838 | A | 0    | 0      | G |
| 13 | BICF2S2441862           | 65095626 | G | 0.5  | 0.7857 | A |
| 13 | BICF2P108270            | 65103248 | A | 0    | 0      | G |
| 13 | BICF2S2307536           | 65113559 | A | 0    | 0      | C |
| 13 | BICF2G630745620         | 65124789 | G | 0.25 | 0.5714 | A |
| 13 | BICF2G630745588         | 65138013 | A | 0    | 0      | T |
| 13 | BICF2G630745585         | 65142787 | 0 | 0    | 0      | G |
| 13 | BICF2G630745559         | 65153877 | G | 0.25 | 0.2143 | A |
| 13 | BICF2G630745550         | 65161178 | G | 0.75 | 0.4286 | A |
| 13 | TIGRP2P185293_rs8538968 | 65163877 | G | 0.75 | 0.4286 | A |
| 13 | BICF2G630745540         | 65171760 | G | 0.5  | 0.7857 | A |
| 13 | BICF2G630745523         | 65186948 | A | 0    | 0      | G |
| 13 | BICF2S23434282          | 65194670 | A | 0.5  | 0.2143 | G |
| 13 | BICF2P833391            | 65206592 | G | 0.5  | 0.2143 | A |
| 13 | BICF2G630745494         | 65215763 | A | 0    | 0      | T |
| 13 | BICF2G630745482         | 65220100 | A | 0    | 0      | G |
| 13 | BICF2G630745481         | 65220193 | A | 0    | 0      | G |
| 13 | BICF2P619169            | 65231113 | T | 0.5  | 0.2143 | A |
| 13 | BICF2G630745432         | 65237376 | G | 1    | 0.7143 | A |
| 13 | BICF2G630745425         | 65240324 | A | 1    | 0.7143 | G |
| 13 | BICF2G630745401         | 65252400 | A | 0.75 | 0.4286 | C |
| 13 | BICF2G630745400         | 65252454 | G | 0    | 0      | A |
| 13 | BICF2P121614            | 65265693 | G | 0.5  | 0.5    | A |
| 13 | TIGRP2P185357_rs8683196 | 65289811 | A | 0.25 | 0.5    | G |
| 13 | TIGRP2P185362_rs8645098 | 65305078 | A | 0    | 0      | G |
| 13 | BICF2P1245214           | 65305127 | G | 1    | 0.7143 | A |
| 13 | BICF2G630745260         | 65317116 | A | 1    | 1      | C |
| 13 | BICF2G630745245         | 65325293 | G | 0.75 | 0.5    | A |
| 13 | BICF2S23036084          | 65336625 | G | 0.25 | 0.2143 | A |
| 13 | BICF2S22960477          | 65350927 | G | 0    | 0.2143 | A |
| 13 | BICF2G630745193         | 65355817 | A | 0.25 | 0.2143 | G |
| 13 | BICF2G630745163         | 65367445 | C | 0    | 0      | A |
| 13 | BICF2G630745162         | 65367611 | A | 0    | 0      | G |
| 13 | BICF2S23517935          | 65371365 | G | 0.25 | 0.2143 | A |
| 13 | BICF2G630745148         | 65371828 | A | 0.25 | 0.2143 | G |



|    |                         |          |   |      |        |   |
|----|-------------------------|----------|---|------|--------|---|
| 13 | BICF2G630745139         | 65380315 | G | 0.75 | 0.5    | A |
| 13 | BICF2G630745118         | 65390093 | G | 0    | 0      | A |
| 13 | BICF2P1186593           | 65408256 | A | 0.75 | 0.7857 | G |
| 13 | BICF2G630745104         | 65414854 | G | 0    | 0      | A |
| 13 | TIGRP2P185389_rs8995085 | 65452976 | A | 0.25 | 0.2857 | G |
| 13 | BICF2S23147079          | 65460927 | A | 0    | 0      | G |
| 13 | BICF2G630745058         | 65476610 | A | 0    | 0.2857 | G |
| 13 | BICF2G630745043         | 65489794 | G | 0.25 | 0.2857 | A |
| 13 | TIGRP2P185416_rs9126279 | 65492954 | A | 0    | 0.2857 | G |
| 13 | BICF2G630745035         | 65507137 | C | 0.75 | 0.4286 | A |
| 13 | BICF2G630745029         | 65525236 | G | 0.5  | 0.5    | A |
| 13 | BICF2G630745027         | 65527724 | G | 0    | 0      | A |
| 13 | BICF2G630745006         | 65539606 | A | 0    | 0      | G |
| 13 | BICF2G630744995         | 65550014 | A | 0.75 | 0.7857 | G |
| 13 | BICF2G630744986         | 65561662 | A | 0.75 | 0.5    | G |
| 13 | BICF2G630744975         | 65573912 | A | 0    | 0      | G |
| 13 | BICF2G630744966         | 65585228 | G | 0.25 | 0.2143 | A |
| 13 | BICF2G630744913         | 65607350 | A | 0.25 | 0.5714 | G |
| 13 | BICF2G630744912         | 65609581 | G | 0    | 0      | A |
| 13 | BICF2P470518            | 65636864 | A | 0    | 0      | C |
| 13 | BICF2G630744864         | 65652468 | A | 0    | 0      | G |
| 13 | BICF2G630744858         | 65654795 | G | 0    | 0      | A |
| 13 | BICF2G630744834         | 65667368 | G | 0.75 | 0.5    | A |
| 13 | BICF2P784774            | 65677674 | A | 0    | 0      | G |
| 13 | BICF2G630744810         | 65691078 | A | 0.25 | 0.5714 | G |
| 13 | BICF2G630744806         | 65708763 | G | 0.75 | 0.4286 | A |
| 13 | BICF2S23024846          | 65716055 | G | 0    | 0      | A |
| 13 | BICF2G630744802         | 65725294 | A | 0    | 0      | T |
| 13 | BICF2P746819            | 65735462 | G | 1    | 1      | A |
| 13 | BICF2P1317468           | 65747479 | G | 0.25 | 0.2857 | A |
| 13 | BICF2S23658131          | 65766969 | G | 0    | 0.25   | A |
| 13 | BICF2P476776            | 65770046 | A | 0    | 0      | G |
| 13 | BICF2P68062             | 65781371 | C | 0    | 0      | A |
| 13 | BICF2S2418580           | 65801317 | A | 1    | 1      | C |
| 13 | TIGRP2P185451_rs8953085 | 65804784 | A | 0.75 | 0.7143 | G |
| 13 | BICF2P1144071           | 65814782 | G | 0.75 | 0.4286 | A |
| 13 | BICF2S2376094           | 65833660 | G | 1    | 0.7143 | A |
| 13 | TIGRP2P185479_rs8792182 | 65838813 | 0 | 0    | 0      | G |
| 13 | BICF2G630744746         | 65845981 | A | 0.75 | 0.7143 | G |
| 13 | BICF2G630744742         | 65849220 | A | 0    | 0      | G |
| 13 | BICF2G630744721         | 65873472 | G | 0.75 | 0.7143 | A |
| 13 | BICF2P288299            | 65910822 | G | 0.25 | 0.5    | C |
| 13 | BICF2G630744680         | 65929365 | A | 0.25 | 0.2857 | G |
| 13 | BICF2P1372798           | 65932451 | A | 0.25 | 0.5    | G |
| 13 | BICF2S2354461           | 65941474 | A | 0    | 0      | G |
| 13 | BICF2P281837            | 65952961 | A | 0    | 0      | G |
| 13 | BICF2P281836            | 65953131 | G | 0.25 | 0.2143 | A |

|    |                         |          |   |      |        |   |
|----|-------------------------|----------|---|------|--------|---|
| 13 | BICF2P699326            | 65964480 | A | 0.25 | 0.1    | G |
| 13 | BICF2G630744640         | 65976149 | G | 0.75 | 0.7857 | A |
| 13 | BICF2G630744608         | 65987693 | A | 0    | 0.2    | C |
| 13 | BICF2P35010             | 66001798 | C | 0.5  | 0.5    | A |
| 13 | BICF2S23043799          | 66021072 | G | 0.75 | 0.7857 | A |
| 13 | BICF2S23343975          | 66029051 | G | 0.75 | 0.5    | A |
| 13 | BICF2G630744592         | 66037993 | A | 0    | 0      | G |
| 13 | BICF2P1347428           | 66048960 | G | 0    | 0      | A |
| 13 | BICF2G630744568         | 66053606 | C | 0    | 0      | A |
| 13 | BICF2P483506            | 66055997 | A | 0    | 0      | G |
| 18 | BICF2P111625            | 3015664  | 0 | 0    | 0      | G |
| 18 | BICF2S23145797          | 3028416  | G | 0.5  | 0.5    | C |
| 18 | BICF2P900994            | 3046367  | G | 1    | 1      | A |
| 18 | BICF2P264063            | 3056491  | C | 1    | 1      | A |
| 18 | G982f1S282              | 3062991  | A | 1    | 1      | G |
| 18 | TIGRP2P237901_rs9100159 | 3133813  | G | 1    | 1      | A |
| 18 | BICF2P1068056           | 3148801  | A | 1    | 1      | G |
| 18 | BICF2P1068057           | 3148877  | A | 1    | 1      | G |
| 18 | BICF2P271099            | 3158061  | G | 1    | 1      | A |
| 18 | TIGRP2P237921_rs8922906 | 3173798  | G | 1    | 1      | A |
| 18 | TIGRP2P237925_rs8960126 | 3176131  | A | 0    | 0      | G |
| 18 | BICF2S2336464           | 3190891  | A | 0.5  | 0.5    | G |
| 18 | BICF2P336209            | 3197274  | G | 1    | 1      | A |
| 18 | BICF2P452831            | 3227797  | A | 1    | 1      | G |
| 18 | BICF2P469200            | 3232629  | A | 1    | 1      | G |
| 18 | TIGRP2P237978_rs9014629 | 3248984  | G | 1    | 1      | A |
| 18 | TIGRP2P237992_rs8525645 | 3263061  | A | 0    | 0      | C |
| 18 | TIGRP2P237996_rs9101529 | 3271564  | A | 1    | 1      | G |
| 18 | TIGRP2P238010_rs8727388 | 3286372  | A | 1    | 1      | G |
| 18 | BICF2P1046608           | 3290471  | A | 0.5  | 0.5    | G |
| 18 | BICF2P1033242           | 3312158  | G | 0    | 0      | A |
| 18 | BICF2P1243893           | 3326417  | G | 0    | 0      | A |
| 18 | BICF2P508668            | 3342964  | 0 | 0    | 0      | G |
| 18 | TIGRP2P238048_rs8732637 | 3353984  | G | 0    | 0      | A |
| 18 | TIGRP2P238051_rs8679555 | 3364919  | C | 0    | 0      | A |
| 18 | TIGRP2P238056_rs8948132 | 3373157  | G | 0    | 0      | A |
| 18 | BICF2P146834            | 3381308  | A | 0.5  | 0.5    | C |
| 18 | BICF2P711168            | 3400023  | A | 0    | 0      | G |
| 18 | TIGRP2P238065_rs9125430 | 3407232  | 0 | 0    | 0      | A |
| 18 | BICF2P625839            | 3419601  | A | 0    | 0      | C |
| 18 | BICF2P862178            | 3439129  | A | 0.5  | 0.5    | C |
| 18 | TIGRP2P238070_rs9083409 | 3459874  | A | 0    | 0      | C |
| 18 | BICF2P455075            | 3464432  | G | 0    | 0      | A |
| 18 | BICF2P1298491           | 3474362  | 0 | 0    | 0      | C |
| 18 | BICF2S23523336          | 3485908  | A | 0.5  | 0.5    | G |
| 18 | TIGRP2P238074_rs9244727 | 3497162  | G | 0    | 0      | A |
| 18 | BICF2S23224560          | 3536574  | A | 0    | 0      | G |

|    |                         |         |   |      |        |   |
|----|-------------------------|---------|---|------|--------|---|
| 18 | BICF2S23534235          | 3541860 | A | 0    | 0      | G |
| 18 | BICF2S2363867           | 3548846 | A | 0.5  | 0.5    | G |
| 18 | BICF2S23036852          | 3564070 | 0 | 0    | 0      | C |
| 18 | G984f15S100             | 3592947 | 0 | 0    | 0      | A |
| 18 | BICF2P1060259           | 3615287 | 0 | 0    | 0      | G |
| 18 | BICF2P360431            | 3668019 | 0 | 0    | 0      | A |
| 18 | TIGRP2P238079_rs9233635 | 3672595 | 0 | 0    | 0      | A |
| 18 | TIGRP2P238080_rs8946816 | 3713936 | T | 0.5  | 0.5    | A |
| 18 | BICF2P935213            | 3718193 | A | 0.5  | 0.5    | G |
| 18 | TIGRP2P238081_rs9217975 | 3728930 | 0 | 0    | 0      | A |
| 18 | BICF2P955875            | 3744834 | 0 | 0    | 0      | C |
| 18 | G986f38S250             | 3767919 | 0 | 0    | 0      | C |
| 18 | BICF2P629856            | 3792920 | 0 | 0    | 0      | A |
| 18 | TIGRP2P238083_rs8773208 | 3805655 | A | 1    | 1      | C |
| 18 | TIGRP2P238084_rs8694781 | 3816759 | 0 | 0    | 0      | G |
| 18 | BICF2P1085195           | 3845339 | G | 0.5  | 0.5    | A |
| 18 | TIGRP2P238088_rs8691766 | 3885956 | 0 | 0    | 0      | G |
| 18 | BICF2P656120            | 3890907 | A | 0.5  | 0.5    | G |
| 18 | BICF2P829968            | 3903889 | A | 0.5  | 0.5    | G |
| 18 | BICF2P451018            | 3922730 | 0 | 0    | 0      | T |
| 18 | G988f27S161             | 3944342 | A | 0    | 0      | G |
| 18 | G988f28S200             | 3944959 | G | 0    | 0      | A |
| 18 | BICF2P146281            | 3965216 | 0 | 0    | 0      | G |
| 18 | BICF2P1295452           | 3979885 | 0 | 0    | 0      | A |
| 18 | BICF2P731202            | 4004751 | 0 | 0    | 0      | A |
| 18 | BICF2P265746            | 4021149 | 0 | 0    | 0      | G |
| 18 | BICF2P346156            | 4025327 | A | 0.25 | 0.2857 | G |
| 18 | BICF2P1046182           | 4076191 | 0 | 0    | 0      | G |
| 18 | G990f34S64              | 4099717 | 0 | 0    | 0      | G |
| 18 | BICF2P697034            | 4119729 | A | 0.25 | 0.2857 | G |
| 18 | TIGRP2P238096_rs8859228 | 4130023 | 0 | 0    | 0      | A |
| 18 | G991f79S218             | 4177696 | A | 0    | 0      | C |
| 18 | BICF2S23417453          | 4211903 | 0 | 0    | 0      | A |
| 18 | BICF2P860302            | 4242460 | 0 | 0    | 0      | G |
| 18 | TIGRP2P238099_rs8717502 | 4262727 | A | 0.5  | 0.5    | G |
| 18 | BICF2P1298892           | 4266742 | A | 0.75 | 0.7143 | G |
| 18 | BICF2S23510137          | 4281291 | G | 0    | 0      | A |
| 18 | BICF2P849639            | 4315994 | G | 0.25 | 0.2857 | A |
| 18 | TIGRP2P238103_rs8595601 | 4329439 | 0 | 0    | 0      | G |
| 18 | TIGRP2P238104_rs9110106 | 4344058 | 0 | 0    | 0      | C |
| 18 | G992f38S45              | 4359718 | 0 | 0    | 0      | C |
| 18 | TIGRP2P238105_rs8891171 | 4397999 | 0 | 0    | 0      | A |
| 18 | BICF2P183140            | 4434030 | 0 | 0    | 0      | A |
| 18 | BICF2P840063            | 4485776 | 0 | 0    | 0      | C |
| 18 | BICF2S22955589          | 4504922 | G | 0    | 0      | A |
| 18 | BICF2P982477            | 4523785 | 0 | 0    | 0      | G |
| 18 | BICF2P1206369           | 4533632 | 0 | 0    | 0      | C |

|    |                         |         |   |      |        |   |
|----|-------------------------|---------|---|------|--------|---|
| 18 | BICF2P943170            | 4546422 | 0 | 0    | 0      | G |
| 18 | BICF2P507538            | 4559975 | 0 | 0    | 0      | C |
| 18 | BICF2P116522            | 4572717 | 0 | 0    | 0      | C |
| 18 | BICF2P682483            | 4582855 | 0 | 0    | 0      | A |
| 18 | BICF2P124976            | 4609359 | 0 | 0    | 0      | A |
| 18 | G995f51S211             | 4629436 | 0 | 0    | 0      | C |
| 18 | TIGRP2P238110_rs8553448 | 4641726 | 0 | 0    | 0      | G |
| 18 | BICF2S23338741          | 4673128 | G | 0.25 | 0.2143 | A |
| 18 | BICF2S22945333          | 4688275 | C | 0.25 | 0.2143 | A |
| 18 | BICF2P99430             | 4699103 | 0 | 0    | 0      | G |
| 18 | BICF2S2298851           | 4705260 | C | 0.25 | 0.2143 | A |
| 18 | BICF2P1389602           | 4730019 | A | 0.5  | 0.5    | G |
| 18 | BICF2S2376655           | 4742178 | A | 0.5  | 0.5    | G |
| 18 | BICF2P596592            | 4757339 | C | 0    | 0      | G |
| 18 | TIGRP2P238117_rs9006772 | 4777648 | 0 | 0    | 0      | G |
| 18 | TIGRP2P238119_rs9155127 | 4791717 | 0 | 0    | 0      | C |
| 18 | BICF2P139655            | 4799738 | A | 0    | 0      | G |
| 18 | TIGRP2P238122_rs8649430 | 4811161 | 0 | 0    | 0      | G |
| 18 | TIGRP2P238123_rs9108034 | 4824662 | G | 0    | 0      | A |
| 18 | BICF2P357392            | 4837101 | 0 | 0    | 0      | G |
| 18 | BICF2P468071            | 4850513 | 0 | 0    | 0      | A |
| 18 | BICF2S23913238          | 4853287 | 0 | 0    | 0      | G |
| 18 | BICF2P828442            | 4866632 | 0 | 0    | 0      | C |
| 18 | BICF2P381190            | 4886662 | 0 | 0    | 0      | G |
| 18 | BICF2P381187            | 4887634 | 0 | 0    | 0      | T |
| 18 | TIGRP2P238130_rs8996464 | 4909691 | 0 | 0    | 0      | G |
| 18 | BICF2P907466            | 4919866 | 0 | 0    | 0      | G |
| 18 | TIGRP2P238132_rs8757806 | 4929731 | G | 0    | 0      | A |
| 18 | BICF2P1466354           | 4937944 | A | 0    | 0      | G |
| 18 | BICF2P440326            | 4951290 | C | 0    | 0      | G |
| 18 | BICF2P874005            | 4959653 | A | 0    | 0      | C |
| 18 | BICF2P928021            | 4971847 | C | 0    | 0      | G |
| 18 | BICF2P1182592           | 4980153 | G | 0    | 0      | C |
| 18 | BICF2P1378069           | 4994445 | G | 0.5  | 0.5    | A |
| 18 | TIGRP2P238162_rs8805509 | 5005071 | G | 0.5  | 0.5    | A |
| 18 | BICF2P874371            | 5022379 | 0 | 0    | 0      | G |
| 18 | BICF2P797482            | 5045311 | 0 | 0    | 0      | G |
| 18 | G996f36S292             | 5069358 | C | 0.5  | 0.5    | A |
| 18 | G997f48S310             | 5105994 | G | 0.5  | 0.5    | A |
| 18 | G997f50S215             | 5106812 | G | 0.5  | 0.5    | A |
| 18 | TIGRP2P238175_rs8716809 | 5126421 | 0 | 0    | 0      | G |
| 18 | BICF2P654278            | 5151482 | A | 0    | 0      | G |
| 18 | BICF2P655462            | 5156055 | G | 0.25 | 0.2857 | A |
| 18 | BICF2P1191033           | 5167047 | 0 | 0    | 0      | A |
| 18 | BICF2S22954054          | 5183835 | G | 0.5  | 0.5    | A |
| 18 | BICF2S22953552          | 5187824 | C | 0.5  | 0.5    | A |
| 18 | TIGRP2P253880_rs9038897 | 5212336 | A | 0    | 0      | G |

|    |                         |         |   |      |        |   |
|----|-------------------------|---------|---|------|--------|---|
| 18 | TIGRP2P253883_rs8718635 | 5227886 | 0 | 0    | 0      | C |
| 18 | BICF2P754074            | 5233697 | A | 0.5  | 0.5    | G |
| 18 | BICF2P293951            | 5236329 | A | 0.5  | 0.5    | G |
| 18 | BICF2P602299            | 5251444 | 0 | 0    | 0      | A |
| 18 | BICF2P1186279           | 5276975 | G | 0    | 0.1667 | A |
| 18 | BICF2P1186278           | 5277044 | T | 0.25 | 0.2143 | A |
| 18 | BICF2P461252            | 5283915 | G | 0.75 | 0.7857 | A |
| 18 | BICF2P879737            | 5291054 | C | 1    | 1      | G |
| 18 | BICF2P163146            | 5296804 | G | 1    | 1      | A |
| 18 | BICF2P652950            | 5306934 | A | 0.25 | 0.2143 | C |
| 18 | TIGRP2P253931_rs8997314 | 5317863 | G | 0.25 | 0.2143 | C |
| 18 | TIGRP2P253939_rs9217971 | 5326861 | G | 0.25 | 0.2143 | A |
| 18 | BICF2S23259485          | 5338019 | C | 1    | 1      | A |
| 18 | BICF2P1338311           | 5348212 | A | 0.25 | 0.2143 | G |
| 18 | TIGRP2P253975_rs8897000 | 5362366 | A | 0.75 | 0.7857 | G |
| 18 | BICF2S23760612          | 5374587 | G | 1    | 1      | A |
| 18 | BICF2P636554            | 5388501 | A | 0.25 | 0.2143 | G |
| 18 | TIGRP2P254013_rs9195539 | 5396556 | A | 0.75 | 0.7857 | G |
| 18 | TIGRP2P254028_rs8507786 | 5406832 | G | 0.75 | 0.7857 | A |
| 18 | BICF2S23750273          | 5422762 | G | 0.75 | 0.7857 | A |
| 18 | BICF2P228579            | 5430590 | G | 1    | 1      | A |
| 18 | TIGRP2P254054_rs9110109 | 5449914 | A | 0.75 | 0.7857 | G |
| 18 | BICF2P531896            | 5457566 | A | 0.75 | 0.7857 | G |
| 18 | TIGRP2P254060_rs8568791 | 5467639 | G | 0.75 | 0.7857 | A |
| 18 | BICF2P766570            | 5479664 | A | 0.25 | 0.2857 | G |
| 18 | BICF2P1014267           | 5493249 | G | 0.75 | 0.7857 | A |
| 18 | TIGRP2P254068_rs9124587 | 5502812 | 0 | 0    | 0      | G |
| 18 | BICF2P1006929           | 5512082 | G | 0.25 | 0.2143 | A |
| 18 | BICF2P1299781           | 5522052 | A | 0.25 | 0.2143 | G |
| 18 | BICF2P672676            | 5543603 | C | 0.25 | 0.2143 | A |
| 18 | BICF2S23761559          | 5562106 | T | 0.25 | 0.2143 | A |
| 18 | BICF2P15617             | 5572732 | G | 0.25 | 0.2143 | A |
| 18 | BICF2P439160            | 5587296 | A | 0.25 | 0.2143 | C |
| 18 | TIGRP2P254095_rs8954095 | 5594969 | A | 0.25 | 0.2143 | G |
| 18 | TIGRP2P254109_rs8627412 | 5605791 | G | 0.25 | 0.2143 | A |
| 18 | BICF2P477812            | 5619906 | G | 0.25 | 0.2143 | A |
| 18 | BICF2P1238318           | 5629193 | A | 0.25 | 0.2143 | G |
| 18 | BICF2P1354921           | 5652736 | A | 0.25 | 0.2143 | G |
| 18 | BICF2S23741435          | 5661990 | A | 0.25 | 0.2143 | G |
| 18 | BICF2P1456540           | 5682821 | 0 | 0    | 0      | G |
| 18 | BICF2P37118             | 5694792 | G | 0.25 | 0.2143 | A |
| 18 | TIGRP2P254175_rs8960266 | 5713966 | G | 0.25 | 0.2143 | A |
| 18 | BICF2P1123483           | 5726554 | G | 0.25 | 0.2143 | A |
| 18 | TIGRP2P254184_rs8915021 | 5728091 | A | 0.25 | 0.1667 | G |
| 18 | BICF2P499804            | 5741100 | 0 | 0    | 0      | A |
| 18 | BICF2P825842            | 5765212 | A | 0.25 | 0.2143 | G |
| 18 | BICF2P243632            | 5783766 | A | 0.25 | 0.2143 | G |

|    |                         |         |   |      |        |   |
|----|-------------------------|---------|---|------|--------|---|
| 18 | BICF2P1139856           | 5794059 | A | 0.25 | 0.2143 | G |
| 18 | BICF2P1376844           | 5796973 | G | 0.25 | 0.2143 | A |
| 18 | TIGRP2P254212_rs8762156 | 5826824 | G | 0.25 | 0.2143 | A |
| 18 | TIGRP2P254216_rs8737235 | 5834540 | G | 0.25 | 0.2143 | A |
| 18 | TIGRP2P254223_rs9171168 | 5845556 | G | 0.25 | 0.2143 | A |
| 18 | BICF2P528757            | 5854452 | 0 | 0    | 0      | C |
| 18 | BICF2P949451            | 5870540 | 0 | 0    | 0      | T |
| 18 | BICF2P940327            | 5877357 | 0 | 0    | 0      | A |
| 18 | BICF2S24412612          | 5899286 | 0 | 0    | 0      | A |
| 18 | BICF2P85495             | 5900249 | 0 | 0    | 0      | A |
| 18 | BICF2P1208663           | 5914892 | C | 0.25 | 0.2143 | A |
| 18 | BICF2P108715            | 5925011 | 0 | 0    | 0      | G |
| 18 | BICF2S2343674           | 5934303 | 0 | 0    | 0      | C |
| 18 | BICF2P924590            | 5947971 | A | 0    | 0.2143 | C |
| 18 | BICF2P413024            | 6003239 | 0 | 0    | 0      | A |
| 18 | BICF2P252788            | 6038365 | G | 0.25 | 0.2143 | A |
| 18 | BICF2P972952            | 6060728 | 0 | 0    | 0      | G |
| 18 | BICF2P797265            | 6090560 | G | 0.75 | 0.7143 | A |
| 18 | BICF2P321975            | 6102233 | 0 | 0    | 0      | A |
| 18 | BICF2S23721015          | 6110636 | G | 0    | 0      | A |
| 18 | BICF2P236955            | 6164930 | C | 0.25 | 0.2143 | A |
| 18 | TIGRP2P254252_rs8662473 | 6190932 | C | 0.25 | 0.2143 | A |
| 18 | BICF2P410144            | 6225432 | 0 | 0    | 0      | A |
| 18 | BICF2P133936            | 6238598 | G | 0.25 | 0.2857 | A |
| 18 | BICF2P163960            | 6245029 | 0 | 0    | 0      | A |
| 18 | BICF2P457643            | 6276886 | 0 | 0    | 0      | C |
| 18 | BICF2P908072            | 6306153 | A | 0.25 | 0.2143 | G |
| 18 | BICF2P642991            | 6315877 | 0 | 0    | 0      | C |
| 18 | BICF2P826254            | 6331035 | A | 0.25 | 0.2143 | G |
| 18 | BICF2P915680            | 6368536 | 0 | 0    | 0      | A |
| 18 | BICF2P1161840           | 6391196 | 0 | 0    | 0      | G |
| 18 | BICF2P1161839           | 6394456 | 0 | 0    | 0      | T |
| 18 | G1000f32S160            | 6415686 | 0 | 0    | 0      | G |
| 18 | BICF2P1062052           | 6436499 | 0 | 0    | 0      | G |
| 18 | BICF2P336417            | 6458919 | 0 | 0    | 0      | A |
| 18 | BICF2S23523756          | 6465087 | G | 0    | 0      | A |
| 18 | BICF2P379164            | 6475175 | 0 | 0    | 0      | G |
| 18 | BICF2P1035485           | 6508423 | 0 | 0    | 0      | A |
| 18 | TIGRP2P254261_rs9081666 | 6529678 | 0 | 0    | 0      | G |
| 18 | BICF2P1123485           | 6537083 | 0 | 0    | 0      | A |
| 18 | G1001f30S189            | 6555101 | 0 | 0    | 0      | G |
| 18 | BICF2P373709            | 6578690 | 0 | 0    | 0      | A |
| 18 | BICF2P689267            | 6604933 | 0 | 0    | 0      | G |
| 18 | BICF2P85718             | 6614286 | 0 | 0    | 0      | T |
| 18 | BICF2P982466            | 6625792 | 0 | 0    | 0      | A |
| 18 | BICF2P1046025           | 6650527 | 0 | 0    | 0      | G |
| 18 | BICF2S239675            | 6667132 | 0 | 0    | 0      | G |

|    |                         |         |   |      |        |   |
|----|-------------------------|---------|---|------|--------|---|
| 18 | BICF2P1277789           | 6675182 | A | 0.25 | 0.2143 | C |
| 18 | BICF2P1184770           | 6688313 | 0 | 0    | 0      | G |
| 18 | BICF2P181397            | 6718556 | 0 | 0    | 0      | G |
| 18 | TIGRP2P254267_rs9190742 | 6733235 | 0 | 0    | 0      | A |
| 18 | BICF2P339883            | 6751027 | G | 0    | 0      | A |
| 18 | BICF2S2415389           | 6784561 | 0 | 0    | 0      | A |
| 18 | TIGRP2P254270_rs8943981 | 6786305 | A | 0    | 0      | G |
| 18 | BICF2P655155            | 6806722 | 0 | 0    | 0      | G |
| 18 | BICF2P965280            | 6819913 | A | 0    | 0      | G |
| 18 | BICF2P1381029           | 6834092 | 0 | 0    | 0      | G |
| 18 | BICF2S22942387          | 6842842 | A | 0    | 0      | G |
| 18 | BICF2S24410928          | 6868787 | A | 0    | 0      | G |
| 18 | BICF2S23219751          | 6880413 | G | 0    | 0      | A |
| 18 | G1002f28S117            | 6897770 | G | 0    | 0      | A |
| 18 | G1002f31S232            | 6902208 | C | 0    | 0      | A |
| 18 | BICF2S23258829          | 6920635 | T | 0    | 0      | A |
| 18 | BICF2P1062227           | 6926213 | 0 | 0    | 0      | A |
| 18 | BICF2P906294            | 6944625 | 0 | 0    | 0      | A |
| 18 | BICF2P1243737           | 6956527 | 0 | 0    | 0      | C |
| 18 | G1003f33S61             | 6976604 | G | 0    | 0      | A |
| 18 | TIGRP2P254276_rs8788119 | 7002625 | 0 | 0    | 0      | A |
| 18 | G1004f30S93             | 7015429 | 0 | 0    | 0      | A |
| 18 | BICF2P960438            | 7067901 | T | 0    | 0      | A |
| 18 | TIGRP2P254288_rs9180869 | 7089566 | G | 0.25 | 0.2857 | A |
| 18 | BICF2P1148343           | 7099826 | 0 | 0    | 0      | A |
| 18 | BICF2P742133            | 7126519 | 0 | 0    | 0      | A |
| 18 | BICF2P1404370           | 7131970 | A | 0    | 0.2    | G |
| 18 | BICF2S2309122           | 7143454 | 0 | 0    | 0      | T |
| 18 | TIGRP2P254294_rs8932974 | 7155877 | 0 | 0    | 0      | T |
| 18 | G1005f38S33             | 7169903 | 0 | 0    | 0      | A |
| 18 | G1006f33S336            | 7220875 | A | 0    | 0      | G |
| 18 | BICF2P1225221           | 7308434 | 0 | 0    | 0      | A |
| 18 | BICF2P427801            | 7343441 | 0 | 0    | 0      | G |
| 18 | BICF2P267826            | 7353538 | A | 0.25 | 0.2857 | G |
| 18 | BICF2P753952            | 7363016 | 0 | 0    | 0      | A |
| 18 | BICF2P1193433           | 7379867 | 0 | 0    | 0      | A |
| 18 | BICF2S2304538           | 7395925 | G | 0    | 0      | A |
| 18 | BICF2S2396620           | 7414231 | 0 | 0    | 0      | T |
| 18 | BICF2P980954            | 7440753 | A | 0.25 | 0.2857 | C |
| 18 | BICF2P229666            | 7459653 | 0 | 0    | 0      | G |
| 18 | BICF2P1289602           | 7477126 | A | 0    | 0      | G |
| 18 | BICF2P735804            | 7497075 | 0 | 0    | 0      | G |
| 18 | BICF2P353926            | 7502765 | C | 0    | 0      | A |
| 18 | BICF2S23912832          | 7513481 | G | 0    | 0      | A |
| 18 | BICF2P298615            | 7534138 | 0 | 0    | 0      | T |
| 18 | BICF2P625681            | 7544073 | 0 | 0    | 0      | G |
| 18 | BICF2S23229259          | 7559184 | T | 0    | 0      | A |

|    |                         |         |   |      |        |   |
|----|-------------------------|---------|---|------|--------|---|
| 18 | G1008f17S143            | 7581908 | 0 | 0    | 0      | C |
| 18 | BICF2P26411             | 7599384 | 0 | 0    | 0      | T |
| 18 | BICF2P26414             | 7603179 | 0 | 0    | 0      | A |
| 18 | BICF2S23428811          | 7618801 | C | 0    | 0      | A |
| 18 | BICF2P1279490           | 7632894 | A | 0.25 | 0.2857 | G |
| 18 | BICF2S23237927          | 7638501 | G | 0    | 0      | A |
| 18 | G1009f22S302            | 7669587 | 0 | 0    | 0      | G |
| 18 | BICF2S23440690          | 7689414 | A | 0    | 0      | C |
| 18 | BICF2P220666            | 7693820 | 0 | 0    | 0      | A |
| 18 | BICF2S24410342          | 7722335 | 0 | 0    | 0      | C |
| 18 | BICF2S2324431           | 7730274 | G | 0    | 0      | A |
| 18 | G1010f20S228            | 7781806 | 0 | 0    | 0      | C |
| 18 | BICF2P894755            | 7824592 | A | 0.5  | 0.5    | C |
| 18 | BICF2S23450503          | 7839730 | G | 0    | 0      | A |
| 18 | BICF2P539451            | 7867804 | 0 | 0    | 0      | A |
| 18 | BICF2S2443140           | 7885793 | A | 0    | 0      | C |
| 18 | BICF2P1305781           | 7893396 | A | 0.5  | 0.5    | G |
| 18 | BICF2P1213362           | 7908159 | A | 0    | 0      | G |
| 18 | BICF2P1177048           | 7925049 | G | NA   | 0.5    | A |
| 18 | BICF2P424575            | 7935865 | 0 | 0    | 0      | A |
| 18 | BICF2P1236452           | 7958203 | C | 0    | 0      | A |
| 18 | BICF2P1054068           | 7971228 | A | 0    | 0      | G |
| 18 | TIGRP2P254407_rs9123538 | 7985318 | 0 | 0    | 0      | A |
| 18 | BICF2S24412094          | 7992883 | A | 0    | 0      | G |
| 18 | BICF2P588115            | 8005885 | A | 0.25 | 0.2857 | G |
| 18 | BICF2S239202            | 8019887 | A | 0    | 0      | G |
| 18 | BICF2P518402            | 8030343 | 0 | 0    | 0      | G |
| 18 | BICF2P415260            | 8046328 | G | 0.25 | 0.2857 | A |
| 18 | TIGRP2P254409_rs8850172 | 8056776 | A | 0.25 | 0.2857 | C |
| 18 | TIGRP2P254410_rs8547623 | 8062599 | G | 0.25 | 0.2857 | A |
| 18 | BICF2P685988            | 8075902 | A | 0.25 | 0.2857 | G |
| 18 | TIGRP2P254416_rs8889114 | 8093328 | 0 | 0    | 0      | A |
| 18 | TIGRP2P254418_rs8952650 | 8098723 | G | 0.25 | 0.2857 | A |
| 18 | BICF2P795551            | 8118166 | 0 | 0    | 0      | G |
| 18 | TIGRP2P254425_rs8880797 | 8124851 | A | 0.25 | 0.2857 | G |
| 18 | BICF2P1443472           | 8137742 | A | 0.25 | 0.2857 | G |
| 18 | BICF2P471579            | 8145175 | G | 0.25 | 0.2857 | A |
| 18 | BICF2P1008449           | 8169351 | A | 0.25 | 0.2857 | G |
| 18 | BICF2P1315817           | 8179591 | A | 0.25 | 0.2857 | C |
| 18 | TIGRP2P254440_rs8677821 | 8188588 | G | 0.25 | 0.2857 | A |
| 18 | BICF2P599799            | 8210900 | A | 0.25 | 0.2857 | G |
| 18 | BICF2P530495            | 8220446 | 0 | 0    | 0      | A |
| 18 | BICF2P348073            | 8232891 | G | 0.75 | 0.7857 | A |
| 18 | BICF2P1136735           | 8242637 | A | 0.75 | 0.7857 | C |
| 18 | BICF2P544829            | 8256894 | C | 0.25 | 0.2857 | A |
| 18 | BICF2S23613030          | 8258000 | G | 0.25 | 0.2143 | A |
| 18 | BICF2S2306300           | 8272802 | A | 0.5  | 0.5    | T |



|    |                         |         |   |      |        |   |
|----|-------------------------|---------|---|------|--------|---|
| 18 | BICF2P1059852           | 8300662 | G | 0.25 | 0.2857 | A |
| 18 | BICF2P283373            | 8310846 | G | 0.25 | 0.2857 | A |
| 18 | BICF2P1230638           | 8325293 | A | 0.5  | 0.5    | C |
| 18 | BICF2P631156            | 8333065 | A | 0.25 | 0.2143 | G |
| 18 | BICF2P439618            | 8338610 | 0 | 0    | 0      | C |
| 18 | BICF2S2301023           | 8349052 | G | 0    | 0      | A |
| 18 | BICF2P1367005           | 8363214 | G | 0.25 | 0.2143 | A |
| 18 | BICF2P516272            | 8375603 | A | 0.25 | 0.2857 | G |
| 18 | BICF2P267031            | 8384506 | 0 | 0    | 0      | A |
| 18 | TIGRP2P254482_rs8998630 | 8400149 | 0 | 0    | 0      | A |
| 18 | BICF2P1157926           | 8416267 | A | 0.75 | 0.7857 | G |
| 18 | BICF2P1403558           | 8437823 | G | 0.75 | 0.7857 | A |
| 18 | BICF2P725721            | 8442735 | C | 0.5  | 0.5    | G |
| 18 | BICF2P895939            | 8463602 | A | 0.25 | 0.2857 | G |
| 18 | BICF2P904277            | 8470737 | G | 0.25 | 0.2857 | A |
| 18 | BICF2S23334745          | 8486936 | A | 0.25 | 0.2857 | G |
| 18 | BICF2P142910            | 8493181 | 0 | NA   | 0      | A |
| 18 | BICF2P228036            | 8504956 | A | 0    | 0      | G |
| 18 | BICF2P844289            | 8510687 | A | 0    | 0      | G |
| 18 | BICF2P725195            | 8527058 | 0 | 0    | 0      | A |
| 18 | BICF2P314185            | 8558514 | C | 0.25 | 0.2143 | A |
| 18 | BICF2P102750            | 8578883 | A | 0    | 0      | G |
| 18 | BICF2P233121            | 8585444 | A | 0    | 0      | G |
| 18 | BICF2S2364956           | 8594493 | A | 0    | 0      | T |
| 18 | BICF2P278663            | 8606761 | G | 0    | 0      | A |
| 18 | BICF2P1090795           | 8617841 | C | 0.5  | 0.5    | A |
| 18 | BICF2P1046687           | 8637346 | A | 0.5  | 0.5    | G |
| 18 | BICF2P1204821           | 8654589 | A | 0.5  | 0.5    | G |
| 18 | BICF2P1199700           | 8661445 | A | 0.5  | 0.5    | C |
| 18 | BICF2S2376523           | 8677949 | A | 0    | 0      | G |
| 18 | BICF2P664401            | 8703264 | A | 0.5  | 0.5    | T |
| 18 | TIGRP2P254598_rs9181222 | 8713843 | G | 0.5  | 0.5    | A |
| 18 | BICF2P1085461           | 8728365 | G | 0.5  | 0.5    | A |
| 18 | TIGRP2P254601_rs8817723 | 8729874 | A | 0.5  | 0.5    | C |
| 18 | BICF2P947105            | 8731347 | A | 0.5  | 0.5    | G |
| 18 | TIGRP2P254610_rs8634350 | 8744271 | A | 0.5  | 0.5    | C |
| 18 | BICF2P1084730           | 8755956 | A | 0.5  | 0.5    | G |
| 18 | BICF2P1084736           | 8757283 | C | 0.5  | 0.5    | A |
| 18 | BICF2P1360391           | 8765787 | A | 0.5  | 0.5    | C |
| 18 | BICF2P138765            | 8777182 | A | 0.5  | 0.5    | G |
| 18 | BICF2P1394355           | 8788214 | A | 0.5  | 0.5    | G |
| 18 | BICF2P525491            | 8810429 | A | 0.5  | 0.5    | G |
| 18 | BICF2P645863            | 8821400 | A | 1    | 1      | C |
| 18 | BICF2P62957             | 8837053 | G | 0.75 | 0.7143 | A |
| 18 | BICF2S23337725          | 8847112 | A | 0.25 | 0.2143 | G |
| 18 | BICF2P909996            | 8862495 | G | 1    | 1      | A |
| 18 | BICF2P1277067           | 8870915 | G | 0.75 | 0.7143 | A |

|    |                         |         |   |      |        |   |
|----|-------------------------|---------|---|------|--------|---|
| 18 | BICF2P1236444           | 8887159 | G | 0.75 | 0.7143 | A |
| 18 | BICF2S2327474           | 8893245 | A | 0.25 | 0.2143 | G |
| 18 | TIGRP2P254649_rs8530275 | 8901979 | 0 | 0    | 0      | C |
| 18 | BICF2P1378050           | 8920196 | A | 0    | 0      | G |
| 18 | BICF2P1102148           | 8925179 | G | 0    | 0      | A |
| 18 | BICF2P579527            | 8940885 | A | 0    | 0      | G |
| 18 | BICF2P385757            | 8944884 | G | 0    | 0      | A |
| 18 | BICF2P1310662           | 8949761 | G | 0    | 0      | A |
| 18 | BICF2P160719            | 8959721 | A | 0    | 0      | G |
| 18 | BICF2S24410532          | 8981486 | G | 0    | 0      | A |
| 18 | BICF2S23657958          | 8995376 | A | 0    | 0      | G |
| 18 | TIGRP2P254674_rs9216665 | 9010350 | C | 0    | 0      | A |
| 18 | BICF2P185870            | 9019825 | 0 | 0    | 0      | G |
| 18 | BICF2P623967            | 9042097 | A | 0.25 | 0.2143 | G |
| 18 | BICF2S23449921          | 9048479 | G | 0    | 0.1667 | A |
| 18 | TIGRP2P254693_rs8571082 | 9051033 | A | 0.25 | 0.2143 | G |
| 18 | BICF2P99850             | 9070872 | 0 | 0    | 0      | G |
| 18 | TIGRP2P254696_rs8986455 | 9091400 | 0 | 0    | 0      | G |
| 18 | BICF2P173106            | 9099215 | A | 0.25 | 0.2143 | G |
| 18 | TIGRP2P254700_rs9143895 | 9118003 | A | 0.25 | 0.2143 | G |
| 18 | TIGRP2P254702_rs8904529 | 9120598 | G | 0.25 | 0.2857 | A |
| 18 | BICF2P534268            | 9150883 | C | 0.75 | 0.7857 | G |
| 18 | BICF2P131662            | 9164274 | G | 1    | 0.8333 | A |
| 18 | BICF2S23114905          | 9167378 | G | 0.25 | 0.2143 | A |
| 18 | BICF2P1294108           | 9196484 | A | 0.25 | 0.2143 | C |
| 18 | BICF2P1106432           | 9210462 | A | 0.25 | 0.2143 | G |
| 18 | BICF2P174439            | 9222278 | G | 0.25 | 0.2143 | A |
| 18 | BICF2P1081955           | 9224799 | A | 0.25 | 0.2143 | G |
| 18 | BICF2P325631            | 9234652 | A | 0.75 | 0.7857 | G |
| 18 | BICF2P565641            | 9262719 | G | 0.25 | 0.2143 | A |
| 18 | BICF2P1291589           | 9280035 | A | 0.75 | 0.7857 | G |
| 18 | BICF2P875208            | 9283973 | A | 0.25 | 0.2143 | G |
| 18 | BICF2P538535            | 9294451 | G | 0    | 0      | A |
| 18 | TIGRP2P254722_rs9222170 | 9314643 | G | 0.25 | 0.2143 | A |
| 18 | BICF2P57675             | 9316259 | 0 | 0    | 0      | A |
| 18 | BICF2P886610            | 9328973 | G | 0    | 0      | A |
| 18 | TIGRP2P254733_rs8660130 | 9338292 | A | 0.75 | 0.7857 | G |
| 18 | TIGRP2P254743_rs8611391 | 9371145 | A | 0.5  | 0.5    | G |
| 18 | BICF2S23344181          | 9374632 | A | 0.5  | 0.5    | C |
| 18 | BICF2P1305753           | 9385054 | C | 0.25 | 0.2143 | A |
| 18 | BICF2P224582            | 9393204 | A | 0    | 0      | C |
| 18 | BICF2P1515634           | 9397519 | A | 0.25 | 0.2143 | G |
| 18 | BICF2P61227             | 9407622 | A | 0.25 | 0.2143 | G |
| 18 | BICF2P372646            | 9419580 | 0 | 0    | 0      | A |
| 18 | BICF2P423319            | 9433769 | G | 0.25 | 0.2143 | A |
| 18 | BICF2P700537            | 9445906 | C | 0.25 | 0.2143 | A |
| 18 | BICF2P495326            | 9453501 | A | 0.25 | 0.2143 | G |

|    |                         |          |   |      |        |   |
|----|-------------------------|----------|---|------|--------|---|
| 18 | BICF2P555905            | 9471371  | C | 0.25 | 0.2143 | A |
| 18 | BICF2P681749            | 9481267  | G | 0.25 | 0.1667 | A |
| 18 | BICF2P430738            | 9516567  | A | 0.25 | 0.2143 | G |
| 18 | BICF2P1186265           | 9522149  | 0 | 0    | 0      | G |
| 18 | BICF2P375006            | 9536032  | A | 0.25 | 0.2143 | C |
| 18 | BICF2P1348841           | 9552987  | A | 0.25 | 0.2143 | G |
| 18 | TIGRP2P254756_rs9084400 | 9563935  | G | 0    | 0      | A |
| 18 | BICF2P1313502           | 9572366  | A | 0.5  | 0.5    | G |
| 18 | BICF2P148999            | 9584679  | C | 0.25 | 0.2143 | A |
| 18 | BICF2P918043            | 9599524  | A | 0.25 | 0.2143 | G |
| 18 | BICF2P153689            | 9627037  | C | 0.5  | 0.5    | A |
| 18 | BICF2P739333            | 9640687  | A | 0.5  | 0.5    | G |
| 18 | BICF2P609608            | 9645406  | G | 0    | 0      | A |
| 18 | BICF2P864901            | 9658388  | G | 0.25 | 0.2143 | A |
| 18 | BICF2P1218679           | 9666593  | C | 0    | 0      | A |
| 18 | BICF2P1008875           | 9675896  | A | 0.25 | 0.2143 | G |
| 18 | BICF2P124996            | 9686099  | G | 0.25 | 0.2143 | A |
| 18 | BICF2P1113400           | 9704038  | A | 0.25 | 0.2143 | G |
| 18 | BICF2S2365202           | 9723344  | A | 0.25 | 0.2143 | G |
| 18 | BICF2S23535154          | 9732131  | A | 0.25 | 0.2143 | G |
| 18 | BICF2P466194            | 9746419  | G | 0.75 | 0.7857 | A |
| 18 | BICF2P247387            | 9758381  | A | 0.25 | 0.2143 | G |
| 18 | BICF2P1119059           | 9763775  | A | 0    | 0      | G |
| 18 | TIGRP2P254780_rs9130662 | 9778322  | T | 0    | 0      | A |
| 18 | TIGRP2P254781_rs9241888 | 9789486  | A | 0.75 | 0.7857 | G |
| 18 | BICF2P793575            | 9800546  | A | 0    | 0      | G |
| 18 | BICF2P357887            | 9807149  | G | 0    | 0      | A |
| 18 | BICF2P1118072           | 9814510  | A | 0    | 0      | G |
| 18 | BICF2P456982            | 9823583  | A | 0.75 | 0.7857 | G |
| 18 | BICF2S23513563          | 9841876  | G | 0.25 | 0.2143 | A |
| 18 | TIGRP2P254802_rs8807536 | 9860480  | A | 0.25 | 0.2143 | G |
| 18 | BICF2P478733            | 9876894  | G | 0.25 | 0.2143 | C |
| 18 | BICF2P899038            | 9888565  | A | 0    | 0      | G |
| 18 | BICF2P491573            | 9901203  | A | 0    | 0      | G |
| 18 | TIGRP2P254826_rs9045048 | 9902333  | A | 0    | 0      | G |
| 18 | TIGRP2P254831_rs8526684 | 9924332  | G | 0    | 0      | A |
| 18 | BICF2P1285775           | 9933791  | C | 0    | 0      | A |
| 18 | BICF2P1021011           | 9944735  | C | 0    | 0      | A |
| 18 | TIGRP2P254841_rs8753299 | 9953523  | A | 0    | 0      | G |
| 18 | BICF2P1273208           | 9974220  | A | 0    | 0      | C |
| 18 | TIGRP2P254851_rs8856155 | 9989626  | A | 0    | 0      | G |
| 18 | BICF2P1267876           | 9996030  | A | 0.5  | 0.5    | G |
| 18 | BICF2P568628            | 10001531 | G | 0.5  | 0.5    | A |
| 18 | BICF2P568627            | 10001548 | G | 0.5  | 0.5    | A |
| 18 | BICF2P847387            | 10008786 | G | 0.5  | 0.5    | A |
| 18 | BICF2P715141            | 10025321 | G | 0.5  | 0.5    | A |
| 18 | BICF2P169495            | 10030032 | A | 0    | 0      | G |

|    |                         |          |   |      |        |   |
|----|-------------------------|----------|---|------|--------|---|
| 18 | BICF2P859023            | 10044334 | A | 0.5  | 0.5    | G |
| 18 | BICF2P4192              | 10050710 | A | 0    | 0      | G |
| 18 | TIGRP2P254865_rs9218285 | 10060377 | 0 | 0    | 0      | A |
| 18 | TIGRP2P254867_rs8981843 | 10065187 | G | 0    | 0      | A |
| 18 | BICF2P812588            | 10080725 | C | 0    | 0      | A |
| 18 | TIGRP2P254887_rs8708374 | 10096898 | A | 0    | 0      | G |
| 18 | TIGRP2P238176_rs8962695 | 10138314 | A | 0    | 0      | G |
| 18 | BICF2P189411            | 10160112 | G | 0    | 0      | A |
| 18 | TIGRP2P238183_rs8669421 | 10199578 | A | 0    | 0      | G |
| 18 | TIGRP2P238192_rs8579252 | 10210105 | G | 0.5  | 0.5    | A |
| 18 | BICF2P1173187           | 10223482 | G | 0    | 0      | A |
| 18 | BICF2S23316838          | 10232302 | C | 0    | 0      | G |
| 18 | TIGRP2P238207_rs8495678 | 10238503 | G | 0    | 0      | A |
| 18 | BICF2S2313166           | 10246531 | A | 0    | 0      | C |
| 18 | TIGRP2P238226_rs8768442 | 10259982 | C | 0    | 0      | G |
| 18 | BICF2S23451794          | 10287256 | G | 0    | 0      | A |
| 18 | TIGRP2P238235_rs9002255 | 10296950 | A | 0    | 0      | G |
| 18 | BICF2S22961596          | 10320060 | G | 0    | 0      | A |
| 18 | BICF2P52226             | 10334879 | G | 0.75 | 0.7143 | A |
| 18 | BICF2P1247161           | 10338686 | A | 0.75 | 0.7143 | G |
| 18 | BICF2S23536667          | 10354860 | G | 0.25 | 0.2857 | A |
| 18 | BICF2S2338447           | 10370044 | 0 | 0    | 0      | G |
| 18 | BICF2P547160            | 10382365 | 0 | 0    | 0      | A |
| 18 | BICF2S23752204          | 10386460 | A | 0.5  | 0.5    | T |
| 18 | BICF2S23246431          | 10399929 | A | 0.5  | 0.5    | G |
| 18 | BICF2P1197186           | 10417219 | 0 | 0    | 0      | G |
| 18 | BICF2S23752957          | 10430450 | T | 0    | 0      | A |
| 18 | BICF2P1463657           | 10447242 | A | 0.5  | 0.5    | G |
| 18 | BICF2S23318132          | 10461748 | A | 0    | 0      | G |
| 18 | BICF2P116150            | 10466007 | G | 0.5  | 0.5    | A |
| 18 | TIGRP2P238273_rs9151012 | 10479683 | A | 0    | 0      | G |
| 18 | BICF2S22924614          | 10489215 | 0 | 0    | 0      | G |
| 18 | TIGRP2P238276_rs9116677 | 10501941 | A | 0.5  | 0.5    | G |
| 18 | BICF2S23449805          | 10530940 | G | 0    | 0      | A |
| 18 | BICF2S23640295          | 10536821 | A | 0    | 0      | C |
| 18 | BICF2P1248594           | 10550513 | A | 0    | 0      | G |
| 18 | BICF2P1234974           | 10559903 | A | 0    | 0      | G |
| 18 | BICF2P928428            | 10571299 | 0 | 0    | 0      | G |
| 18 | BICF2P337505            | 10585218 | G | 0    | 0      | A |
| 18 | TIGRP2P238286_rs8904920 | 10595546 | A | 0    | 0      | G |
| 18 | BICF2P488164            | 10603619 | G | 0.75 | 0.7857 | A |
| 18 | BICF2S23144486          | 10624813 | C | 0.75 | 0.7857 | G |
| 18 | BICF2P155780            | 10627833 | A | 0.75 | 0.7857 | T |
| 18 | BICF2P316012            | 10649809 | A | 0.25 | 0.2857 | G |
| 18 | TIGRP2P238319_rs8842859 | 10664501 | A | 0.75 | 0.7857 | G |
| 18 | BICF2P1466043           | 10682322 | A | 0.75 | 0.7857 | C |
| 18 | BICF2P1466048           | 10683501 | 0 | 0    | 0      | G |

|    |                         |          |   |      |        |   |
|----|-------------------------|----------|---|------|--------|---|
| 18 | TIGRP2P238330_rs9088436 | 10729318 | 0 | 0    | 0      | C |
| 18 | BICF2P564462            | 10743899 | G | 0.5  | 0.5    | A |
| 18 | BICF2P1143237           | 10753994 | A | 0.5  | 0.5    | T |
| 18 | BICF2S2303478           | 10777232 | G | 0.5  | 0.5    | A |
| 18 | BICF2P156458            | 10810541 | 0 | 0    | 0      | G |
| 18 | BICF2P842500            | 10821531 | 0 | 0    | 0      | G |
| 18 | BICF2P51559             | 10843343 | A | 0    | 0      | G |
| 18 | TIGRP2P238351_rs8581800 | 10871703 | A | 0    | 0      | C |
| 18 | BICF2P1222653           | 10886405 | 0 | 0    | 0      | G |
| 18 | BICF2P1162717           | 10901259 | 0 | 0    | 0      | G |
| 18 | BICF2P242971            | 10907995 | 0 | 0    | 0      | G |
| 18 | BICF2P7811              | 10919440 | A | 0    | 0      | G |
| 18 | BICF2P590577            | 10934893 | 0 | 0    | 0      | A |
| 18 | TIGRP2P238355_rs8866642 | 10944037 | A | 0    | 0      | G |
| 18 | BICF2S23311989          | 10953929 | A | 0.75 | 0.7857 | G |
| 18 | BICF2P247026            | 10960716 | G | 0    | 0      | A |
| 18 | BICF2P412390            | 10977306 | A | 0    | 0      | G |
| 18 | BICF2P352585            | 10986197 | A | 0    | 0      | G |
| 18 | BICF2P484573            | 10997479 | 0 | 0    | 0      | G |
| 18 | BICF2P1276658           | 11005682 | A | 0    | 0      | G |
| 18 | BICF2P1091759           | 11026244 | C | 1    | 1      | A |
| 18 | BICF2P30676             | 11030097 | G | 1    | 1      | A |
| 18 | BICF2S23319105          | 11047225 | G | 1    | 1      | A |
| 18 | BICF2S23253766          | 11063527 | G | 0.75 | 0.7857 | A |
| 18 | BICF2S23551026          | 11082383 | C | 0    | 0      | A |
| 18 | BICF2P751251            | 11095875 | 0 | 0    | 0      | A |
| 18 | BICF2S23736527          | 11097523 | C | 0    | 0      | A |
| 18 | BICF2P314129            | 11121100 | 0 | 0    | 0      | C |
| 18 | TIGRP2P238367_rs9142197 | 11133025 | 0 | 0    | 0      | G |
| 18 | BICF2P728987            | 11154794 | 0 | 0    | 0      | G |
| 18 | BICF2P533985            | 11156611 | 0 | 0    | 0      | A |
| 18 | TIGRP2P238368_rs8715835 | 11167723 | C | 0    | 0      | A |
| 18 | TIGRP2P238372_rs9082282 | 11179970 | C | 0    | 0      | A |
| 18 | TIGRP2P238376_rs8664847 | 11195013 | G | 0    | 0      | A |
| 18 | BICF2P187063            | 11213046 | A | 0    | 0      | G |
| 18 | BICF2P1120562           | 11231180 | A | 0    | 0      | G |
| 18 | BICF2P137997            | 11240217 | 0 | 0    | 0      | A |
| 18 | TIGRP2P238401_rs8745644 | 11250677 | A | 0    | 0      | G |
| 18 | BICF2P1394538           | 11261017 | G | 0    | 0      | A |
| 18 | BICF2S22932785          | 11275098 | G | 0    | 0      | A |
| 18 | TIGRP2P238403_rs8739261 | 11286681 | 0 | 0    | 0      | C |
| 18 | TIGRP2P238404_rs8972279 | 11306649 | 0 | 0    | 0      | C |
| 18 | BICF2P404440            | 11323253 | 0 | 0    | 0      | G |
| 18 | BICF2P479291            | 11328401 | G | 0.75 | 0.7857 | C |
| 18 | BICF2P407084            | 11347790 | A | 0.25 | 0.2143 | G |
| 18 | TIGRP2P238409_rs8877940 | 11360175 | 0 | 0    | 0      | A |
| 18 | BICF2P1354195           | 11368790 | A | 0.5  | 0.5    | G |

|    |                         |          |   |      |        |   |
|----|-------------------------|----------|---|------|--------|---|
| 18 | BICF2S23050688          | 11375526 | A | 0.5  | 0.5    | G |
| 18 | BICF2P376053            | 11385732 | A | 0.5  | 0.5    | G |
| 18 | BICF2P850888            | 11405937 | A | 0.5  | 0.5    | G |
| 18 | BICF2P539433            | 11416043 | G | 0.5  | 0.5    | A |
| 18 | BICF2P1454838           | 11424275 | A | 0.5  | 0.5    | G |
| 18 | BICF2P1438217           | 11432259 | A | 0.5  | 0.5    | G |
| 18 | BICF2P1342621           | 11445934 | G | 0    | 0      | A |
| 18 | BICF2S23623282          | 11457993 | G | 0    | 0      | A |
| 18 | BICF2P1334922           | 11469591 | C | 0    | 0      | A |
| 18 | TIGRP2P238423_rs8587828 | 11470391 | G | 0.75 | 0.7857 | A |
| 18 | BICF2P715166            | 11473093 | G | 0.75 | 0.7857 | A |
| 18 | BICF2S22924943          | 11477628 | A | 0.75 | 0.7857 | G |
| 18 | BICF2P536695            | 11492564 | A | 0.5  | 0.5    | G |
| 18 | BICF2P448077            | 11501314 | G | 0.5  | 0.5    | A |
| 18 | BICF2S23225121          | 11516881 | C | 0    | 0      | A |
| 18 | BICF2S229258            | 11528119 | A | 0.5  | 0.5    | T |
| 18 | BICF2P645723            | 11534973 | A | 0.5  | 0.5    | G |
| 18 | BICF2P1084711           | 11553532 | T | 0    | 0      | A |
| 18 | BICF2P420552            | 11567530 | G | 1    | 1      | A |
| 18 | BICF2S23148439          | 11579085 | A | 0    | 0      | G |
| 18 | BICF2S23230550          | 11583651 | G | 0.75 | 0.7857 | A |
| 18 | BICF2S23124394          | 11593717 | G | 0.75 | 0.7857 | A |
| 18 | TIGRP2P238444_rs9115733 | 11619399 | A | 0    | 0      | C |
| 18 | BICF2P166792            | 11632152 | 0 | 0    | 0      | G |
| 18 | BICF2P627685            | 11647196 | C | 0    | 0      | A |
| 18 | TIGRP2P238451_rs9063698 | 11656148 | G | 0    | 0      | A |
| 18 | BICF2P1239891           | 11660716 | A | 0.5  | 0.5    | G |
| 18 | BICF2P106765            | 11672185 | C | 0.5  | 0.5    | A |
| 18 | TIGRP2P238454_rs9153521 | 11682574 | G | 0.75 | 0.7857 | A |
| 18 | BICF2S23410288          | 11685660 | A | 0.75 | 0.8333 | G |
| 18 | BICF2S23763288          | 11704288 | C | 0.75 | 0.7857 | A |
| 18 | BICF2S23763193          | 11707923 | A | 0.75 | 0.7857 | G |
| 18 | TIGRP2P238467_rs8491875 | 11729655 | A | 0    | 0      | G |
| 18 | TIGRP2P238471_rs8491880 | 11730543 | A | 0.75 | 0.7143 | G |
| 18 | BICF2P995961            | 11764176 | 0 | 0    | 0      | A |
| 18 | BICF2P96783             | 11781770 | 0 | 0    | 0      | A |
| 18 | BICF2S23453642          | 11799944 | A | 0    | 0      | C |
| 18 | G1011f65S83             | 11831437 | 0 | 0    | 0      | C |
| 18 | TIGRP2P238484_rs8624673 | 11854699 | A | 0.25 | 0.2143 | C |
| 18 | BICF2P1257750           | 11862686 | 0 | 0    | 0      | G |
| 18 | BICF2P1047781           | 11878546 | 0 | 0    | 0      | A |
| 18 | BICF2S23511149          | 11888875 | G | 0.25 | 0.1667 | A |
| 18 | BICF2S2356091           | 11892940 | T | 0.25 | 0.2143 | A |
| 18 | TIGRP2P238490_rs8980411 | 11904525 | G | 0.25 | 0.2143 | A |
| 18 | TIGRP2P238494_rs8822353 | 11923367 | A | 0.25 | 0.2143 | G |
| 18 | BICF2P938552            | 11928914 | A | 0.25 | 0.1667 | C |
| 18 | TIGRP2P238502_rs8992118 | 11936040 | G | 0    | 0      | A |

|    |                         |          |   |      |        |   |
|----|-------------------------|----------|---|------|--------|---|
| 18 | BICF2S23644619          | 11942498 | 0 | 0    | 0      | G |
| 18 | BICF2S2415985           | 11958596 | G | 0    | 0      | A |
| 18 | BICF2S23440091          | 11964536 | G | 0.25 | 0.2143 | A |
| 18 | BICF2P259546            | 11993992 | 0 | 0    | 0      | G |
| 18 | TIGRP2P238505_rs8994813 | 11996747 | A | 0    | 0      | C |
| 18 | BICF2P1294144           | 12013275 | A | 0    | 0      | C |
| 18 | BICF2P1179628           | 12017967 | G | 0    | 0      | C |
| 18 | TIGRP2P238512_rs9121412 | 12023552 | C | 0    | 0      | A |
| 18 | BICF2P1303958           | 12029970 | G | 0    | 0      | A |
| 18 | BICF2P984690            | 12043724 | C | 0    | 0      | A |
| 18 | BICF2P900341            | 12051045 | A | 0    | 0      | G |
| 18 | TIGRP2P238525_rs8843504 | 12052847 | G | 0    | 0      | A |
| 18 | BICF2P1234885           | 12074216 | 0 | 0    | 0      | G |
| 18 | BICF2P537232            | 12112784 | 0 | 0    | 0      | A |
| 18 | BICF2P287289            | 12127801 | 0 | 0    | 0      | A |
| 18 | BICF2S23516050          | 12155729 | A | 0    | 0      | T |
| 18 | BICF2S23319077          | 12168241 | C | 0    | 0      | A |
| 18 | BICF2G630637718         | 12189083 | 0 | 0    | 0      | G |
| 18 | BICF2S23258604          | 12191027 | G | 0    | 0      | A |
| 18 | BICF2P1223098           | 12223097 | A | 1    | 1      | G |
| 18 | TIGRP2P238533_rs8891683 | 12232278 | C | 1    | 1      | A |
| 18 | BICF2P806537            | 12236626 | G | 1    | 1      | A |
| 18 | BICF2P132291            | 12248979 | A | 1    | 1      | C |
| 18 | BICF2P513350            | 12256728 | G | 1    | 1      | A |
| 18 | TIGRP2P238541_rs8704717 | 12269288 | G | 1    | 1      | A |
| 18 | BICF2P1332731           | 12273924 | G | 1    | 1      | A |
| 18 | BICF2P1332729           | 12274489 | 0 | 0    | 0      | A |
| 18 | TIGRP2P238549_rs9126800 | 12283600 | 0 | 0    | 0      | C |
| 18 | BICF2P1015885           | 12301756 | G | 1    | 1      | A |
| 18 | BICF2S23410610          | 12307170 | A | 1    | 1      | G |
| 18 | BICF2P786211            | 12309780 | A | 1    | 1      | G |
| 18 | TIGRP2P238569_rs8984260 | 12323275 | A | 0.25 | 0.2143 | G |
| 18 | BICF2P627512            | 12334796 | 0 | 0    | 0      | A |
| 18 | BICF2S23310301          | 12358441 | G | 0    | 0      | A |
| 18 | BICF2P253797            | 12401296 | 0 | 0    | 0      | A |
| 18 | TIGRP2P238573_rs8498569 | 12412970 | 0 | 0    | 0      | A |
| 18 | BICF2S23428767          | 12430704 | A | 1    | 1      | G |
| 18 | BICF2P1116211           | 12441097 | G | 0.25 | 0.2143 | A |
| 18 | TIGRP2P238576_rs8888683 | 12444821 | A | 1    | 1      | G |
| 18 | TIGRP2P238579_rs8771645 | 12456280 | G | 1    | 1      | A |
| 18 | BICF2P60563             | 12477817 | A | 0    | 0      | G |
| 18 | BICF2S23534889          | 12493400 | A | 0.75 | 0.8333 | T |
| 18 | BICF2P1093955           | 12516888 | 0 | 0    | 0      | A |
| 18 | BICF2S22963176          | 12524766 | A | 0.5  | 0.5    | G |
| 18 | BICF2S23510883          | 12540073 | C | 0.5  | 0.5    | A |
| 18 | BICF2S23532524          | 12554775 | G | 0.5  | 0.5    | A |
| 18 | BICF2S241834            | 12562101 | G | 0.5  | 0.5    | A |

|    |                         |          |   |      |        |   |
|----|-------------------------|----------|---|------|--------|---|
| 18 | BICF2P839095            | 12600036 | 0 | 0    | 0      | A |
| 18 | BICF2P1136218           | 12624265 | 0 | 0    | 0      | A |
| 18 | BICF2S2356795           | 12639713 | A | 0    | 0      | C |
| 18 | BICF2P1398407           | 12674172 | 0 | 0    | 0      | G |
| 18 | BICF2S2437741           | 12688991 | 0 | 0    | 0      | A |
| 18 | BICF2S2391509           | 12699393 | C | 0.25 | 0.2857 | G |
| 18 | BICF2P79294             | 12719433 | A | 0    | 0      | G |
| 18 | BICF2P163628            | 12731193 | A | 0    | 0      | G |
| 18 | TIGRP2P238586_rs8784100 | 12752190 | A | 0.5  | 0.5    | G |
| 18 | TIGRP2P238587_rs9062220 | 12755082 | A | 0.5  | 0.5    | G |
| 18 | TIGRP2P238596_rs8946444 | 12784945 | T | 0.5  | 0.5    | A |
| 18 | BICF2P866329            | 12788850 | A | 0.5  | 0.5    | G |
| 18 | BICF2P510660            | 12808111 | A | 0    | 0      | G |
| 18 | BICF2P1317962           | 12820881 | G | 0    | 0      | A |
| 18 | BICF2P657642            | 12847030 | 0 | 0    | 0      | A |
| 18 | BICF2P1018249           | 12867247 | G | 0    | 0      | A |
| 18 | BICF2P723511            | 12874865 | G | 0    | 0      | A |
| 18 | BICF2P539537            | 12884661 | G | 0    | 0      | A |
| 18 | TIGRP2P238611_rs9244232 | 12902785 | G | 0    | 0      | A |
| 18 | G1012f19S137            | 12942935 | A | 0    | 0      | C |
| 18 | BICF2P66459             | 12965011 | 0 | 0    | 0      | G |
| 18 | TIGRP2P238616_rs8942653 | 13006312 | A | 0.5  | 0.5    | G |
| 18 | BICF2P708350            | 13007614 | A | 0.5  | 0.5    | G |
| 18 | BICF2P1369346           | 13023832 | 0 | 0    | 0      | A |
| 18 | BICF2S23422684          | 13038145 | T | 0    | 0      | A |
| 18 | BICF2P420436            | 13042129 | G | 0    | 0      | A |
| 18 | BICF2S23764445          | 13052982 | G | 0.5  | 0.5    | A |
| 18 | BICF2P1271203           | 13065869 | A | 0    | 0      | G |
| 18 | BICF2S23345164          | 13082632 | C | 0.5  | 0.5    | A |
| 18 | BICF2P312159            | 13103763 | A | 0.5  | 0.5    | G |
| 18 | BICF2P104462            | 13120323 | A | 0    | 0      | G |
| 18 | TIGRP2P238639_rs9182754 | 13121603 | A | 0    | 0      | G |
| 18 | BICF2P1218709           | 13142514 | A | 0    | 0      | C |
| 18 | TIGRP2P238658_rs8652160 | 13146779 | G | 0    | 0      | C |
| 18 | BICF2P15320             | 13158240 | A | 0    | 0      | G |
| 18 | BICF2P46604             | 13174277 | A | 0.5  | 0.5    | G |
| 18 | BICF2P921933            | 13175873 | A | 0    | 0      | G |
| 18 | BICF2P609162            | 13184673 | A | 0    | 0      | T |
| 18 | TIGRP2P238703_rs8907766 | 13186661 | 0 | 0    | 0      | A |
| 18 | BICF2P94864             | 13190937 | A | 0.5  | 0.5    | G |
| 18 | TIGRP2P238717_rs9105247 | 13208732 | A | 0.5  | 0.5    | C |
| 18 | BICF2P1414351           | 13218511 | A | 0.5  | 0.5    | G |
| 18 | BICF2S23055505          | 13234016 | A | 0.5  | 0.5    | G |
| 18 | BICF2S23154895          | 13241571 | C | 0.5  | 0.5    | A |
| 18 | TIGRP2P238724_rs8944533 | 13258250 | 0 | 0    | 0      | C |
| 18 | BICF2P302871            | 13260899 | 0 | 0    | 0      | G |
| 18 | TIGRP2P238728_rs8536775 | 13281626 | G | 0    | 0      | A |



|    |                         |          |   |      |        |   |
|----|-------------------------|----------|---|------|--------|---|
| 18 | BICF2S23626013          | 13283057 | A | 0    | 0      | G |
| 18 | BICF2P1226678           | 13294207 | A | 0    | 0      | G |
| 18 | TIGRP2P238732_rs8705072 | 13299280 | A | 0    | 0      | G |
| 18 | BICF2P1148341           | 13299592 | 0 | 0    | 0      | A |
| 18 | TIGRP2P238735_rs8719568 | 13307931 | G | 0    | 0      | A |
| 18 | BICF2P525036            | 13326071 | G | 0    | 0      | A |
| 18 | BICF2P478745            | 13339129 | C | 0.75 | 0.7857 | A |
| 18 | BICF2P634330            | 13349398 | G | 0    | 0      | A |
| 18 | BICF2P1153201           | 13356216 | A | 0    | 0      | G |
| 18 | TIGRP2P238747_rs8557429 | 13371975 | G | 0    | 0      | A |
| 18 | BICF2P437487            | 13382529 | A | 0    | 0      | G |
| 18 | BICF2P641428            | 13390782 | G | 0    | 0      | A |
| 18 | BICF2P424719            | 13409423 | A | 0    | 0      | G |
| 18 | TIGRP2P238768_rs9162725 | 13424099 | 0 | 0    | 0      | G |
| 18 | BICF2P1288812           | 13442783 | T | 0    | 0      | A |
| 18 | BICF2P629815            | 13445417 | A | 0    | 0      | G |
| 18 | BICF2P122660            | 13471475 | 0 | 0    | 0      | T |
| 18 | TIGRP2P238774_rs8829680 | 13484842 | 0 | 0    | 0      | A |
| 18 | BICF2P516064            | 13513255 | 0 | 0    | 0      | G |
| 18 | BICF2P702305            | 13524732 | 0 | 0    | 0      | T |
| 18 | BICF2S23424228          | 13544305 | G | 0.5  | 0.5    | A |
| 18 | BICF2P1347010           | 13559159 | A | 0.25 | 0.2857 | G |
| 18 | BICF2P12570             | 13587479 | A | 0.25 | 0.2857 | C |
| 18 | BICF2P603120            | 13598702 | 0 | 0    | 0      | G |
| 18 | TIGRP2P238782_rs8774203 | 13606095 | 0 | 0    | 0      | C |
| 18 | BICF2P546096            | 13633127 | A | 0.5  | 0.5    | G |
| 18 | BICF2P379840            | 13644900 | G | 0    | 0      | A |
| 18 | BICF2P807888            | 13652907 | G | 0    | 0      | A |
| 18 | BICF2P467689            | 13662066 | G | 0    | 0      | A |
| 18 | BICF2P598941            | 13674695 | 0 | 0    | 0      | A |
| 18 | BICF2P1068821           | 13687564 | G | 0    | 0      | A |
| 18 | BICF2P576836            | 13707409 | A | 0    | 0      | G |
| 18 | BICF2P576839            | 13708107 | A | 0    | 0      | G |
| 18 | TIGRP2P238794_rs9195987 | 13720669 | G | 0    | 0      | A |
| 18 | BICF2P1069959           | 13741637 | G | 0    | 0      | A |
| 18 | BICF2S23061082          | 13745439 | G | 0    | 0      | A |
| 18 | BICF2P1366369           | 13761742 | A | 0    | 0      | C |
| 18 | BICF2P639087            | 13775000 | G | 0    | 0      | A |
| 18 | BICF2S23712202          | 13791764 | G | 0.25 | 0.2143 | A |
| 18 | BICF2S2306472           | 13806939 | A | 0    | 0      | G |
| 18 | BICF2P1073204           | 13815680 | A | 0.25 | 0.2143 | G |
| 18 | BICF2P800989            | 13840950 | A | 0.5  | 0.5    | C |
| 18 | BICF2P696381            | 13847253 | A | 0.5  | 0.5    | G |
| 18 | TIGRP2P238812_rs8836780 | 13859220 | A | 0.5  | 0.5    | G |
| 18 | BICF2P452997            | 13872355 | A | 0.25 | 0.2857 | G |
| 18 | BICF2S23540142          | 13886584 | A | 0.5  | 0.5    | G |
| 18 | BICF2P263961            | 13900066 | G | 0.5  | 0.5    | A |

|    |                         |          |   |      |        |   |
|----|-------------------------|----------|---|------|--------|---|
| 18 | BICF2P776108            | 13908214 | 0 | 0    | 0      | A |
| 18 | TIGRP2P238815_rs9111081 | 13922306 | 0 | 0    | 0      | G |
| 18 | BICF2S2444269           | 13928863 | G | 0    | 0      | C |
| 18 | BICF2P895109            | 13960155 | G | 0.25 | 0.2143 | A |
| 18 | TIGRP2P238823_rs8896309 | 13968186 | A | 0    | 0      | C |
| 18 | BICF2S23311152          | 13977785 | G | 0    | 0      | A |
| 18 | BICF2S23721977          | 13986003 | A | 0    | 0      | C |
| 18 | BICF2P939652            | 14019650 | G | 1    | 1      | A |
| 18 | BICF2S23317139          | 14040634 | G | NA   | 0.5    | A |
| 18 | BICF2P395539            | 14050055 | A | 0    | 0      | G |
| 18 | TIGRP2P238868_rs8885998 | 14061280 | A | 0.75 | 0.8333 | G |
| 18 | BICF2P753808            | 14065904 | A | 0.75 | 0.7857 | G |
| 18 | BICF2P476031            | 14076406 | G | 0.75 | 0.7857 | A |
| 18 | TIGRP2P238893_rs9086639 | 14096222 | G | 1    | 1      | A |
| 18 | BICF2P1388649           | 14104364 | 0 | 0    | 0      | G |
| 18 | BICF2P1200055           | 14112246 | A | 0    | 0      | C |
| 18 | BICF2P760102            | 14122032 | A | 0    | 0      | G |
| 18 | BICF2P1080340           | 14150142 | A | 0    | 0      | G |
| 18 | BICF2P1248089           | 14162261 | A | 0    | 0      | G |
| 18 | BICF2S23657071          | 14170399 | G | 0    | 0      | A |
| 18 | BICF2P206433            | 14184090 | A | 0    | 0      | G |
| 18 | BICF2P579789            | 14190897 | G | 0.5  | 0.5    | A |
| 18 | BICF2P894929            | 14197278 | A | 0    | 0      | G |
| 18 | BICF2P924295            | 14209108 | A | 0    | 0      | G |
| 18 | BICF2P811776            | 14216639 | A | 0.25 | 0.2857 | G |
| 18 | BICF2P103454            | 14226564 | G | 0.25 | 0.2857 | A |
| 18 | BICF2P1336859           | 14238941 | A | 0    | 0      | G |
| 18 | BICF2P588630            | 14261775 | A | 0.5  | 0.5    | C |
| 18 | BICF2P206798            | 14275485 | A | 0.5  | 0.5    | C |
| 18 | BICF2P1157069           | 14290095 | A | 0    | 0      | G |
| 18 | BICF2S23534460          | 14298776 | G | 0.5  | 0.5    | A |
| 18 | BICF2P1439040           | 14309285 | G | 0.5  | 0.5    | A |
| 18 | BICF2G630637689         | 14317619 | A | 0.5  | 0.4286 | G |
| 18 | BICF2G630637634         | 14337127 | G | 0.5  | 0.4286 | A |
| 18 | BICF2G630637616         | 14341286 | G | 0.75 | 0.8    | A |
| 18 | BICF2P567552            | 14380320 | A | 0.5  | 0.5714 | G |
| 18 | BICF2G630637356         | 14389608 | A | 0    | 0      | G |
| 18 | BICF2S23510624          | 14401165 | G | 0    | 0      | A |
| 18 | BICF2P1024317           | 14410942 | A | 0    | 0      | G |
| 18 | BICF2S23051484          | 14431123 | A | 0.75 | 0.7857 | G |
| 18 | TIGRP2P239123_rs8537278 | 14437624 | A | 0    | 0      | C |
| 18 | TIGRP2P239131_rs8394828 | 14444668 | A | 0.75 | 0.7857 | G |
| 18 | BICF2P967064            | 14474822 | A | 0.5  | 0.7857 | C |
| 18 | BICF2P1225331           | 14482671 | A | 0    | 0      | C |
| 18 | BICF2P607158            | 14504002 | A | 0    | 0.125  | G |
| 18 | BICF2P607159            | 14504135 | G | 0.75 | 0.7857 | A |
| 18 | BICF2S236514            | 14510656 | 0 | 0    | 0      | T |

|    |                         |          |   |      |        |   |
|----|-------------------------|----------|---|------|--------|---|
| 18 | BICF2P530967            | 14515811 | A | 0.75 | 0.8333 | C |
| 18 | BICF2P214232            | 14532321 | G | 0    | 0      | A |
| 18 | BICF2P326563            | 14537525 | 0 | 0    | 0      | A |
| 18 | BICF2P748852            | 14554677 | G | 0    | 0      | A |
| 18 | BICF2P83623             | 14567356 | A | 0    | 0      | G |
| 18 | TIGRP2P239254_rs8594291 | 14579508 | A | 0    | 0      | G |
| 18 | TIGRP2P239258_rs8580854 | 14588095 | T | 0    | 0      | A |
| 18 | BICF2S23440002          | 14603745 | T | 0    | 0      | A |
| 18 | TIGRP2P239259_rs8815878 | 14606201 | A | 0    | 0      | C |
| 18 | BICF2P133891            | 14645472 | 0 | 0    | 0      | A |
| 18 | BICF2P1286685           | 14661399 | 0 | 0    | 0      | A |
| 18 | G1014f40S39             | 14684430 | 0 | 0    | 0      | C |
| 18 | TIGRP2P239270_rs9090730 | 14699535 | A | 0    | 0      | G |
| 18 | BICF2P154322            | 14709901 | 0 | 0    | 0      | G |
| 18 | BICF2P543221            | 14747534 | G | 0.25 | 0.2143 | A |
| 18 | BICF2S2454596           | 14770729 | G | 0    | 0      | A |
| 18 | G1015f28S153            | 14795013 | 0 | 0    | 0      | C |
| 18 | BICF2P495014            | 14820004 | 0 | 0    | 0      | A |
| 18 | BICF2P348204            | 14846127 | 0 | 0    | 0      | G |
| 18 | TIGRP2P239273_rs8813467 | 14847374 | 0 | 0    | 0      | T |
| 18 | BICF2S24410278          | 14868322 | G | 0.5  | 0.5    | A |
| 18 | BICF2P672063            | 14871005 | A | 0    | 0      | G |
| 18 | BICF2P273213            | 14896494 | G | 0    | 0      | A |
| 18 | BICF2P747478            | 14913763 | A | 0.25 | 0.2143 | G |
| 18 | TIGRP2P239276_rs8922186 | 14915561 | 0 | 0    | 0      | C |
| 18 | BICF2P1196619           | 14932922 | 0 | 0    | 0      | A |
| 18 | BICF2P479186            | 14948725 | 0 | 0    | 0      | A |
| 18 | BICF2P340794            | 14982699 | G | 0    | 0      | A |
| 18 | BICF2P1261702           | 14985086 | G | 0    | 0      | A |
| 18 | BICF2P210516            | 15013348 | A | 0    | 0      | T |
| 18 | BICF2P833242            | 15029986 | G | 0    | 0      | A |
| 18 | TIGRP2P239284_rs9055337 | 15033642 | G | 0    | 0      | A |
| 18 | BICF2P38676             | 15047301 | A | 0    | 0      | G |
| 18 | BICF2P1286695           | 15061516 | 0 | 0    | 0      | G |
| 18 | BICF2S23251883          | 15078305 | 0 | 0    | 0      | A |
| 18 | BICF2S23046573          | 15095717 | 0 | 0    | 0      | G |
| 18 | BICF2P459035            | 15103137 | 0 | 0    | 0      | G |
| 18 | BICF2S23213200          | 15122140 | 0 | 0    | 0      | G |
| 18 | BICF2P727284            | 15125212 | 0 | 0    | 0      | G |
| 18 | BICF2S23531892          | 15141159 | G | 0    | 0      | A |
| 18 | BICF2S23428682          | 15147900 | 0 | 0    | 0      | G |
| 18 | BICF2P150577            | 15167766 | A | 0    | 0      | G |
| 18 | BICF2P336482            | 15177252 | 0 | 0    | 0      | G |
| 18 | BICF2P125944            | 15183118 | 0 | 0    | 0      | G |
| 18 | BICF2P122874            | 15196327 | 0 | 0    | 0      | G |
| 18 | BICF2P122873            | 15196649 | 0 | 0    | 0      | G |
| 18 | BICF2P872257            | 15213497 | 0 | 0    | 0      | A |

|    |                         |          |   |      |        |   |
|----|-------------------------|----------|---|------|--------|---|
| 18 | BICF2S2352435           | 15219667 | 0 | 0    | 0      | G |
| 18 | BICF2S23210321          | 15226017 | G | 0    | 0      | A |
| 18 | TIGRP2P239299_rs9032070 | 15247692 | A | 0.25 | 0.2143 | G |
| 18 | BICF2P1023060           | 15255960 | A | 0.25 | 0.2143 | G |
| 18 | BICF2P334478            | 15270259 | A | 0    | 0      | G |
| 18 | TIGRP2P239305_rs8781501 | 15273597 | C | 0    | 0      | A |
| 18 | TIGRP2P239313_rs8504537 | 15286940 | G | 0    | 0      | A |
| 18 | BICF2P1089568           | 15298905 | G | 0    | 0      | A |
| 18 | BICF2P53942             | 15300953 | A | 0    | 0      | G |
| 18 | TIGRP2P239318_rs8947816 | 15313896 | 0 | 0    | 0      | G |
| 18 | BICF2S22920561          | 15328244 | A | 0.25 | 0.2857 | G |
| 18 | BICF2P458197            | 15338907 | A | 0.25 | 0.2143 | G |
| 18 | BICF2P783804            | 15345887 | A | 0    | 0      | G |
| 18 | BICF2S23530440          | 15365675 | A | 0.25 | 0.2857 | G |
| 18 | BICF2S23015494          | 15377944 | A | 0.25 | 0.2857 | G |
| 18 | TIGRP2P239321_rs8568815 | 15388848 | A | 0    | 0      | G |
| 18 | TIGRP2P239326_rs8606923 | 15415300 | A | 0.25 | 0.2143 | G |
| 18 | BICF2S23119061          | 15429578 | A | 0    | 0      | G |
| 18 | BICF2P670736            | 15433916 | G | 0    | 0      | A |
| 18 | BICF2P983143            | 15447128 | G | 0    | 0      | A |
| 18 | BICF2P884490            | 15461384 | G | 0    | 0      | A |
| 18 | BICF2P1396575           | 15473494 | A | 0    | 0      | G |
| 18 | BICF2P235390            | 15479568 | G | 0    | 0      | A |
| 18 | BICF2P1262580           | 15491075 | G | 0    | 0      | A |
| 18 | BICF2S23222197          | 15503856 | G | 0    | 0      | A |
| 18 | BICF2P785136            | 15511760 | A | 0    | 0      | G |
| 18 | BICF2P419880            | 15516205 | A | 0    | 0      | G |
| 18 | BICF2P1149774           | 15527220 | 0 | 0    | 0      | G |
| 18 | BICF2S23329048          | 15557969 | A | 0    | 0      | G |
| 18 | BICF2S23445290          | 15581272 | A | 0    | 0      | G |
| 18 | BICF2S2444857           | 15610919 | G | 0    | 0      | A |
| 18 | BICF2S2322730           | 15621115 | G | 0.5  | 0.5    | A |
| 18 | BICF2P543690            | 15636396 | A | 0.25 | 0.2857 | T |
| 18 | BICF2P894724            | 15640907 | A | 0.5  | 0.5    | G |
| 18 | BICF2P1076112           | 15660408 | A | 0.5  | 0.5    | G |
| 18 | BICF2P319123            | 15667553 | A | 0.5  | 0.5    | G |
| 18 | TIGRP2P239357_rs8760564 | 15670037 | A | 0    | 0      | G |
| 18 | BICF2P1050447           | 15671103 | G | 0    | 0      | A |
| 18 | TIGRP2P239359_rs8587686 | 15677004 | A | 0.5  | 0.5    | G |
| 18 | BICF2S22958788          | 15693402 | A | 0    | 0      | G |
| 18 | BICF2P581675            | 15708519 | A | 0.5  | 0.5    | G |
| 18 | TIGRP2P239366_rs9092050 | 15718760 | A | 0    | 0      | G |
| 18 | BICF2S23243231          | 15736506 | G | 0.75 | 0.7143 | A |
| 18 | BICF2P487426            | 15753672 | A | 0.75 | 0.7143 | G |
| 18 | BICF2P611252            | 15771084 | A | 0.25 | 0.2143 | G |
| 18 | BICF2P308018            | 15782757 | A | 0    | 0      | G |
| 18 | BICF2S2459727           | 15798562 | 0 | 0    | 0      | G |

|    |                         |          |   |      |        |   |
|----|-------------------------|----------|---|------|--------|---|
| 18 | BICF2S23735929          | 15801804 | A | 0    | 0      | G |
| 18 | BICF2S2335725           | 15825189 | A | 0.25 | 0.2143 | G |
| 18 | TIGRP2P239410_rs9038311 | 15846321 | A | 0    | 0      | G |
| 18 | TIGRP2P239411_rs9053656 | 15851391 | A | 0    | 0      | G |
| 18 | BICF2P675332            | 15867431 | G | 0.25 | 0.2857 | A |
| 18 | TIGRP2P239419_rs8882877 | 15873156 | G | 0.75 | 0.7857 | A |
| 18 | BICF2P826617            | 15873325 | A | 0    | 0      | G |
| 18 | BICF2S23610639          | 15890871 | A | 0.25 | 0.2857 | G |
| 18 | BICF2S23610077          | 15895251 | G | 0    | 0      | A |
| 18 | BICF2P1034235           | 15905998 | A | 0    | 0      | G |
| 18 | BICF2P1376157           | 15915877 | G | 0    | 0      | A |
| 18 | TIGRP2P239446_rs8558555 | 15916718 | G | 0.25 | 0.2143 | A |
| 18 | BICF2S23913955          | 15962672 | A | 0.5  | 0.5    | G |
| 18 | BICF2P256417            | 15974016 | 0 | 0    | 0      | G |
| 18 | BICF2S23050784          | 15992777 | C | 0    | 0      | G |
| 18 | BICF2S237278            | 16021258 | C | 0    | 0      | A |
| 18 | BICF2P868002            | 16036713 | 0 | 0    | 0      | G |
| 18 | BICF2S23117143          | 16046633 | 0 | 0    | 0      | C |
| 18 | BICF2P154458            | 16059957 | C | 0    | 0      | G |
| 18 | BICF2P543194            | 16074998 | C | 0.5  | 0.5    | A |
| 18 | BICF2P1380154           | 16095025 | 0 | 0    | 0      | C |
| 18 | BICF2P106772            | 16116151 | G | 1    | 1      | A |
| 18 | BICF2P1441024           | 16123218 | A | 0    | 0      | G |
| 18 | BICF2P145133            | 16141547 | C | 0.5  | 0.5    | A |
| 18 | BICF2P1041454           | 16156899 | G | 1    | 1      | A |
| 18 | TIGRP2P239479_rs9130904 | 16175607 | 0 | 0    | 0      | G |
| 18 | BICF2P5332              | 16197551 | G | 1    | 1      | A |
| 18 | BICF2P1346130           | 16217140 | G | 1    | 1      | A |
| 18 | BICF2P1223016           | 16234045 | C | 0    | 0      | A |
| 18 | BICF2P481364            | 16246517 | A | 0.5  | 0.5    | G |
| 18 | BICF2P1063916           | 16249924 | G | 0.5  | 0.5    | A |
| 18 | BICF2P1118873           | 16261410 | G | 0.5  | 0.5    | A |
| 18 | BICF2P1011579           | 16280579 | 0 | 0    | 0      | A |
| 18 | BICF2P444514            | 16288464 | G | 1    | 1      | A |
| 18 | BICF2P901099            | 16298486 | G | 0.5  | 0.5    | A |
| 18 | BICF2P582153            | 16310787 | A | 0    | 0      | G |
| 18 | BICF2S23236684          | 16321772 | G | 0.5  | 0.5    | A |
| 18 | BICF2P146165            | 16331546 | A | 0.75 | 0.7857 | G |
| 18 | BICF2P99620             | 16346290 | C | 0.25 | 0.2143 | A |
| 18 | BICF2P1292524           | 16370365 | G | 0.75 | 0.7857 | A |
| 18 | TIGRP2P239514_rs9222324 | 16385182 | A | 0    | 0      | G |
| 18 | BICF2P1102430           | 16397807 | C | 0.75 | 0.7143 | A |
| 18 | BICF2P636029            | 16402431 | A | 0    | 0      | G |
| 18 | BICF2P35605             | 16415724 | C | 0    | 0      | A |
| 18 | BICF2P1366344           | 16425505 | C | 0    | 0      | A |
| 18 | BICF2P418674            | 16444807 | A | 0    | 0      | G |
| 18 | BICF2P145218            | 16456320 | G | 0.25 | 0.2143 | A |

|    |                         |          |   |      |        |   |
|----|-------------------------|----------|---|------|--------|---|
| 18 | BICF2P68326             | 16465368 | 0 | 0    | 0      | A |
| 18 | BICF2S23129105          | 16468576 | 0 | 0    | 0      | G |
| 18 | BICF2P224422            | 16483638 | A | 0.25 | 0.2143 | G |
| 18 | BICF2P1162349           | 16503184 | A | 0    | 0      | G |
| 18 | BICF2P741507            | 16523227 | A | 0.25 | 0.2857 | G |
| 18 | BICF2P331785            | 16526904 | G | 0.75 | 0.7857 | A |
| 18 | TIGRP2P239524_rs8920707 | 16540696 | A | 0.5  | 0.5    | G |
| 18 | BICF2P337815            | 16552846 | A | 0.5  | 0.5    | G |
| 18 | BICF2P1154607           | 16568823 | A | 0    | 0      | G |
| 18 | BICF2P1150462           | 16579659 | C | 0.25 | 0.2857 | G |
| 18 | BICF2P1250765           | 16591125 | A | 1    | 1      | G |
| 18 | BICF2P529617            | 16601705 | A | 0    | 0      | T |
| 18 | BICF2P183307            | 16610243 | A | 0    | 0      | G |
| 18 | TIGRP2P239547_rs9116584 | 16621793 | A | 0.5  | 0.5    | G |
| 18 | BICF2P1304280           | 16631098 | A | 0    | 0      | G |
| 18 | BICF2P129371            | 16647635 | G | 0    | 0      | A |
| 18 | BICF2S23744554          | 16658649 | G | 0.5  | 0.5    | A |
| 18 | BICF2P1118107           | 16669082 | A | 0    | 0      | G |
| 18 | BICF2P1256477           | 16685099 | G | 0.5  | 0.5    | A |
| 18 | BICF2P892066            | 16689405 | A | 0    | 0      | G |
| 18 | BICF2P1376751           | 16704289 | A | 0.75 | 0.7143 | G |
| 18 | BICF2P723607            | 16714525 | G | 0.5  | 0.5    | A |
| 18 | BICF2P723606            | 16714814 | G | 0.75 | 0.7143 | A |
| 18 | BICF2P1108937           | 16723868 | G | 0    | 0      | A |
| 18 | BICF2P588521            | 16734455 | G | 0    | 0      | A |
| 18 | TIGRP2P239564_rs9203245 | 16751740 | G | 0.5  | 0.5    | A |
| 18 | BICF2S2368351           | 16758720 | A | 0    | 0      | G |
| 18 | BICF2P507015            | 16776111 | G | 0.5  | 0.5    | A |
| 18 | BICF2P1112270           | 16792475 | G | 0.5  | 0.5    | A |
| 18 | BICF2S23724142          | 16819375 | C | 0    | 0      | A |
| 18 | BICF2S24410145          | 16829535 | A | 0    | 0      | G |
| 18 | BICF2P136002            | 16849993 | 0 | 0    | 0      | G |
| 18 | TIGRP2P239591_rs8588285 | 16864513 | A | 0    | 0      | G |
| 18 | BICF2P163562            | 16884369 | A | 0    | 0      | C |
| 18 | BICF2P774817            | 16893222 | A | 0    | 0      | C |
| 18 | BICF2P585166            | 16896310 | A | 0.25 | 0.2857 | G |
| 18 | TIGRP2P239623_rs9038543 | 16911515 | G | 0    | 0      | A |
| 18 | BICF2P592418            | 16918806 | A | 0    | 0      | G |
| 18 | BICF2P1124176           | 16928118 | A | 0.25 | 0.2143 | G |
| 18 | BICF2S2304228           | 16939766 | C | 0.25 | 0.2857 | A |
| 18 | BICF2P32799             | 16956878 | 0 | 0    | 0      | G |
| 18 | BICF2S23421089          | 16969148 | G | 0    | 0      | A |
| 18 | BICF2P1391430           | 16981321 | A | 0.75 | 0.7857 | C |
| 18 | BICF2P1421372           | 16989902 | G | 0.5  | 0.5    | A |
| 18 | BICF2P1419295           | 17005331 | A | 0.5  | 0.5    | G |
| 18 | BICF2P1419297           | 17008729 | A | 1    | 1      | G |
| 18 | BICF2P13426             | 17022267 | G | 0.5  | 0.5    | A |

|    |                         |          |   |      |        |   |
|----|-------------------------|----------|---|------|--------|---|
| 18 | BICF2P718938            | 17047939 | A | 0    | 0      | G |
| 18 | BICF2P101722            | 17061868 | A | 0    | 0      | G |
| 18 | TIGRP2P239705_rs9012075 | 17067087 | A | 0    | 0      | G |
| 18 | TIGRP2P239709_rs8815737 | 17078239 | A | 0    | 0      | G |
| 18 | BICF2S23440273          | 17099790 | G | 0.25 | 0.2143 | A |
| 18 | BICF2S22963174          | 17101931 | C | 0    | 0      | A |
| 18 | TIGRP2P239737_rs8500494 | 17118750 | G | 0.75 | 0.7857 | A |
| 18 | BICF2P104962            | 17131200 | 0 | 0    | 0      | C |
| 18 | BICF2S2435042           | 17136801 | A | 1    | 1      | G |
| 18 | TIGRP2P239755_rs8984416 | 17153593 | G | 0.25 | 0.2143 | A |
| 18 | BICF2P896541            | 17164382 | A | 0.5  | 0.5    | C |
| 18 | BICF2P1008478           | 17175557 | A | 0.5  | 0.5    | G |
| 18 | TIGRP2P239777_rs8698038 | 17187129 | G | 0.5  | 0.5    | A |
| 18 | BICF2P742036            | 17193739 | G | 0.5  | 0.5    | A |
| 18 | BICF2S23030029          | 17222023 | A | 0    | 0      | G |
| 18 | BICF2S23911848          | 17234225 | A | 0.5  | 0.5    | C |
| 18 | G1016f25S126            | 17242909 | A | 0.5  | 0.5    | G |
| 18 | BICF2P1104406           | 17272581 | 0 | 0    | 0      | G |
| 18 | BICF2S23045699          | 17273884 | C | 0    | 0      | A |
| 18 | TIGRP2P239799_rs9157243 | 17287331 | A | 0.5  | 0.5    | G |
| 18 | TIGRP2P239815_rs9217007 | 17313406 | A | 0.75 | 0.7143 | G |
| 18 | TIGRP2P239824_rs8561926 | 17322342 | A | 0    | 0      | C |
| 18 | BICF2P443810            | 17331461 | G | 0.5  | 0.5    | A |
| 18 | BICF2S23743682          | 17344492 | C | 0.25 | 0.2143 | G |
| 18 | BICF2P462981            | 17360187 | 0 | 0    | 0      | C |
| 18 | BICF2P457758            | 17385457 | 0 | 0    | 0      | G |
| 18 | BICF2P380791            | 17389019 | T | 0.5  | 0.5    | A |
| 18 | TIGRP2P239855_rs8720801 | 17407119 | A | 0.25 | 0.2857 | G |
| 18 | TIGRP2P239873_rs8533606 | 17415311 | A | 0.25 | 0.2857 | G |
| 18 | BICF2P1001112           | 17427849 | A | 0.25 | 0.2857 | C |
| 18 | BICF2P1017168           | 17438050 | A | 0    | 0      | G |
| 18 | BICF2S23312352          | 17456802 | A | 0    | 0      | G |
| 18 | BICF2P1050589           | 17467994 | A | 1    | 1      | C |
| 18 | BICF2P1050590           | 17468079 | A | 1    | 1      | C |
| 18 | BICF2P1358093           | 17476596 | A | 1    | 1      | G |
| 18 | BICF2P1358094           | 17476801 | A | 0    | 0      | T |
| 18 | BICF2P50833             | 17484003 | 0 | 0    | 0      | G |
| 18 | BICF2P31939             | 17493278 | A | 0.5  | 0.5    | G |
| 18 | BICF2S23626235          | 17510189 | A | 0.75 | 0.7143 | G |
| 18 | BICF2P177213            | 17517246 | C | 0.25 | 0.2857 | A |
| 18 | BICF2P40421             | 17528481 | C | 0.75 | 0.7143 | A |
| 18 | BICF2P711756            | 17554358 | A | 0.5  | 0.5    | G |
| 18 | BICF2P1035130           | 17568685 | G | 0.5  | 0.5    | A |
| 18 | BICF2P996491            | 17573841 | A | 0.5  | 0.5    | G |
| 18 | BICF2P391142            | 17586862 | A | 0.5  | 0.5    | G |
| 18 | BICF2P6881              | 17600434 | A | 0    | 0      | G |
| 18 | BICF2P1384256           | 17616301 | A | 0.75 | 0.7143 | G |

|    |                         |          |   |      |        |   |
|----|-------------------------|----------|---|------|--------|---|
| 18 | TIGRP2P239928_rs8554095 | 17616742 | G | 0.75 | 0.7143 | C |
| 18 | BICF2S23120411          | 17622101 | A | 1    | 1      | G |
| 18 | BICF2P818209            | 17649046 | A | 0    | 0      | G |
| 18 | BICF2P444157            | 17663856 | 0 | 0    | 0      | G |
| 18 | TIGRP2P239952_rs8725098 | 17668770 | G | 0.75 | 0.7857 | A |
| 18 | TIGRP2P239954_rs9057883 | 17680990 | A | 0    | 0      | G |
| 18 | TIGRP2P239961_rs8630198 | 17691740 | 0 | 0    | 0      | G |
| 18 | BICF2P38454             | 17699410 | G | 0.25 | 0.2857 | A |
| 18 | BICF2P1366395           | 17715071 | G | 0.25 | 0.2143 | A |
| 18 | BICF2P1327269           | 17725273 | A | 0.25 | 0.2857 | T |
| 18 | BICF2P140214            | 17734561 | G | 0    | 0      | A |
| 18 | BICF2P1062091           | 17746563 | A | 0.75 | 0.7143 | C |
| 18 | TIGRP2P239993_rs8560834 | 17756537 | G | 0.75 | 0.7143 | A |
| 18 | BICF2P1348247           | 17773402 | C | 0.75 | 0.7857 | A |
| 18 | BICF2P911472            | 17784377 | A | 0    | 0      | G |
| 18 | TIGRP2P240017_rs9017459 | 17795276 | A | 0    | 0      | C |
| 18 | BICF2P446856            | 17804678 | A | 0    | 0      | G |
| 18 | TIGRP2P240032_rs8623139 | 17826543 | 0 | 0    | 0      | A |
| 18 | BICF2P547535            | 17852291 | A | 0.75 | 0.7143 | G |
| 18 | BICF2P294471            | 17865474 | G | 0.75 | 0.7143 | A |
| 18 | BICF2P349887            | 17872479 | A | 0.5  | 0.5    | G |
| 18 | BICF2P1365280           | 17888449 | G | 0    | 0      | A |
| 18 | BICF2S23630247          | 17894276 | G | 0    | 0      | A |
| 18 | BICF2P348071            | 17913316 | A | 0    | 0      | C |
| 18 | BICF2P185325            | 17920210 | 0 | 0    | 0      | A |
| 18 | BICF2P485178            | 17930069 | A | 0    | 0      | G |
| 18 | TIGRP2P240096_rs8592616 | 17948115 | 0 | 0    | 0      | G |
| 18 | TIGRP2P240100_rs8969282 | 17972832 | 0 | 0    | 0      | G |
| 18 | BICF2P1188236           | 17975426 | C | 0.25 | 0.2857 | A |
| 18 | BICF2P916948            | 17986601 | G | 0.25 | 0.2857 | A |
| 18 | BICF2S23123606          | 18003455 | A | 0.25 | 0.2857 | G |
| 18 | BICF2P1004845           | 18011538 | A | 0    | 0      | C |
| 18 | BICF2P292067            | 18023923 | G | 0.25 | 0.2857 | A |
| 18 | BICF2P275774            | 18032507 | G | 0    | 0      | A |
| 18 | TIGRP2P240115_rs8871171 | 18054349 | T | 0    | 0      | A |
| 18 | TIGRP2P240116_rs8697544 | 18058045 | G | 0    | 0      | A |
| 18 | BICF2P568125            | 18071122 | A | 0    | 0      | G |
| 18 | BICF2S23751282          | 18077158 | G | 0    | 0      | A |
| 18 | BICF2S23017999          | 18078399 | A | 0.25 | 0.2857 | G |
| 18 | TIGRP2P240130_rs8707357 | 18094409 | A | 0.25 | 0.2857 | G |
| 18 | TIGRP2P240132_rs8929703 | 18101279 | G | 0.25 | 0.2857 | A |
| 18 | BICF2P141727            | 18114073 | G | 0.25 | 0.2857 | A |
| 18 | BICF2P408597            | 18131350 | A | 0    | 0      | C |
| 18 | BICF2P278698            | 18141067 | A | 0.25 | 0.2857 | G |
| 18 | BICF2P1362022           | 18150646 | G | 0    | 0      | A |
| 18 | BICF2P199745            | 18158580 | C | 0    | 0      | G |
| 18 | BICF2P692932            | 18181246 | 0 | 0    | 0      | T |



|    |                         |          |   |      |        |   |
|----|-------------------------|----------|---|------|--------|---|
| 18 | BICF2P1080570           | 18186175 | 0 | 0    | 0      | G |
| 18 | TIGRP2P240169_rs9084611 | 18193369 | 0 | 0    | 0      | A |
| 18 | BICF2P963882            | 18210935 | G | 0.75 | 0.7857 | A |
| 18 | BICF2S23454133          | 18217464 | G | 0.75 | 0.8333 | A |
| 18 | BICF2P404214            | 18232589 | G | 0    | 0      | A |
| 18 | BICF2P506569            | 18239438 | A | 0.75 | 0.7857 | G |
| 18 | BICF2S23450214          | 18255035 | G | 0.25 | 0.2143 | A |
| 18 | TIGRP2P240182_rs9063985 | 18286763 | A | 0.75 | 0.7857 | G |
| 18 | BICF2S2336067           | 18300763 | G | 0.75 | 0.7857 | A |
| 18 | TIGRP2P240183_rs8557176 | 18316407 | A | 0.25 | 0.1667 | G |
| 18 | BICF2S23655583          | 18321246 | A | 0.75 | 0.7857 | G |
| 18 | TIGRP2P240189_rs8863409 | 18338846 | A | 0.25 | 0.2857 | G |
| 18 | BICF2P1209752           | 18343437 | A | 0.25 | 0.2857 | G |
| 18 | BICF2P290242            | 18358166 | G | 0.25 | 0.2857 | A |
| 18 | BICF2P895303            | 18377059 | A | 0    | 0      | G |
| 18 | BICF2P639617            | 18388836 | A | 0.5  | 0.5    | G |
| 18 | TIGRP2P240222_rs8751910 | 18415402 | A | 0    | 0      | G |
| 18 | BICF2P50132             | 18427318 | A | 0    | 0      | G |
| 18 | TIGRP2P240233_rs9227453 | 18439151 | 0 | 0    | 0      | C |
| 18 | BICF2P1382395           | 18452306 | 0 | 0    | 0      | A |
| 18 | TIGRP2P240247_rs9103403 | 18463917 | A | 0.25 | 0.2143 | G |
| 18 | BICF2S23057195          | 18480222 | G | 0    | 0      | A |
| 18 | BICF2P559032            | 18484427 | A | 0    | 0      | G |
| 18 | TIGRP2P240252_rs9136342 | 18494031 | A | 0    | 0      | G |
| 18 | BICF2P629522            | 18503778 | G | 0    | 0      | A |
| 18 | BICF2P356299            | 18521619 | A | 0    | 0      | G |
| 18 | BICF2P957947            | 18532768 | A | 0    | 0      | G |
| 18 | BICF2P1349964           | 18543497 | G | 0    | 0      | A |
| 18 | TIGRP2P240259_rs8715867 | 18557269 | 0 | 0    | 0      | A |
| 18 | TIGRP2P240269_rs9178106 | 18570636 | G | 0    | 0      | A |
| 18 | BICF2P960501            | 18573061 | 0 | 0    | 0      | G |
| 18 | G1017f47S73             | 18593332 | 0 | 0    | 0      | G |
| 18 | G1017f51S308            | 18595709 | 0 | 0    | 0      | A |
| 18 | BICF2P862065            | 18616604 | G | 0    | 0      | A |
| 18 | BICF2P1318590           | 18636847 | 0 | 0    | 0      | A |
| 18 | BICF2S22925655          | 18644063 | A | 0    | 0      | G |
| 18 | BICF2P419186            | 18657507 | 0 | 0    | 0      | A |
| 18 | BICF2P238770            | 18668067 | 0 | 0    | 0      | A |
| 18 | BICF2P221031            | 18684009 | G | 0    | 0      | A |
| 18 | BICF2P1214360           | 18694401 | 0 | 0    | 0      | A |
| 18 | TIGRP2P240286_rs8578208 | 18737259 | 0 | 0    | 0      | C |
| 18 | TIGRP2P240287_rs9031572 | 18760133 | 0 | 0    | 0      | C |
| 18 | TIGRP2P240289_rs8618889 | 18769604 | 0 | 0    | 0      | G |
| 18 | BICF2P1407599           | 18781552 | A | 0.25 | 0.2857 | G |
| 18 | TIGRP2P240301_rs8864461 | 18796770 | A | 0.75 | 0.7143 | G |
| 18 | BICF2P922119            | 18812648 | G | 0.75 | 0.7143 | A |
| 18 | BICF2P1418750           | 18816791 | C | 0.25 | 0.2143 | A |

|    |                         |          |   |      |        |   |
|----|-------------------------|----------|---|------|--------|---|
| 18 | BICF2S23638647          | 18832923 | A | 0.25 | 0.2143 | C |
| 18 | BICF2P1110035           | 18840576 | A | 0    | 0      | G |
| 18 | BICF2P1118130           | 18849635 | G | 0.25 | 0.2143 | A |
| 18 | BICF2P431919            | 18860238 | G | 0.25 | 0.2143 | A |
| 18 | TIGRP2P240342_rs9003616 | 18873838 | G | 0.25 | 0.2143 | A |
| 18 | BICF2P675089            | 18896357 | 0 | 0    | 0      | G |
| 18 | BICF2S23331140          | 18910492 | G | 0.25 | 0.2143 | A |
| 18 | BICF2P1106570           | 18924937 | A | 0.25 | 0.2143 | G |
| 18 | BICF2P1397175           | 18936588 | G | 0    | 0      | A |
| 18 | BICF2P215711            | 18948914 | C | 0.5  | 0.5    | A |
| 18 | BICF2P1028966           | 18952139 | A | 0.25 | 0.2143 | G |
| 18 | BICF2S23351057          | 18965021 | G | 0    | 0      | A |
| 18 | BICF2S23322377          | 18982042 | G | 0.25 | 0.2143 | A |
| 18 | BICF2P1466342           | 18998095 | G | 0.75 | 0.7857 | A |
| 18 | TIGRP2P240382_rs8954831 | 19019750 | A | 0    | 0      | G |
| 18 | BICF2S23060085          | 19029590 | G | 0    | 0      | A |
| 18 | BICF2P932138            | 19030200 | T | 0.5  | 0.5    | A |
| 18 | BICF2S23060755          | 19033214 | A | 0    | 0      | G |
| 18 | BICF2P669291            | 19047089 | 0 | 0    | 0      | A |
| 18 | BICF2P783761            | 19060946 | T | 1    | 1      | A |
| 18 | TIGRP2P240402_rs9098794 | 19098856 | G | 0.25 | 0.2143 | A |
| 18 | TIGRP2P240403_rs8987697 | 19109454 | 0 | 0    | 0      | C |
| 18 | BICF2S23221677          | 19116461 | A | 0.25 | 0.2143 | C |
| 18 | BICF2S23327763          | 19132641 | G | 0    | 0      | A |
| 18 | BICF2S2374932           | 19147572 | A | 0.25 | 0.2143 | G |
| 18 | BICF2P237472            | 19160229 | A | 0.25 | 0.2143 | G |
| 18 | BICF2P653327            | 19172365 | G | 0.25 | 0.2143 | A |
| 18 | BICF2S23719956          | 19184684 | G | NA   | 0.5    | A |
| 18 | BICF2P834705            | 19195559 | 0 | 0    | 0      | A |
| 18 | BICF2P1116310           | 19214812 | 0 | 0    | 0      | G |
| 18 | TIGRP2P240440_rs8723131 | 19216735 | A | 0.75 | 0.7143 | G |
| 18 | BICF2P228903            | 19233174 | G | 0    | 0      | A |
| 18 | BICF2P440650            | 19245005 | A | 0    | 0      | C |
| 18 | BICF2P440651            | 19245138 | G | 0.25 | 0.2857 | A |
| 18 | TIGRP2P240462_rs9148056 | 19251496 | G | 0.5  | 0.5    | A |
| 18 | TIGRP2P240468_rs8712469 | 19273065 | A | 0.75 | 0.7857 | C |
| 18 | BICF2P1215129           | 19282893 | C | 0.75 | 0.7857 | A |
| 18 | BICF2P1440045           | 19290339 | A | 0    | 0      | G |
| 18 | BICF2P1407525           | 19297854 | A | 0    | 0      | G |
| 18 | BICF2P1430013           | 19309301 | G | 1    | 1      | A |
| 18 | TIGRP2P240493_rs8663167 | 19328399 | A | 0    | 0      | G |
| 18 | BICF2P952466            | 19332545 | G | 0.75 | 0.7857 | A |
| 18 | BICF2P787011            | 19352651 | A | 0    | 0      | G |
| 18 | BICF2P1321728           | 19360745 | A | 0    | 0      | G |
| 18 | BICF2S23529290          | 19374452 | G | 0.25 | 0.2143 | A |
| 18 | BICF2P250787            | 19378410 | C | 0.25 | 0.2143 | A |
| 18 | TIGRP2P240518_rs9217423 | 19389951 | G | 1    | 1      | A |

|    |                         |          |   |      |        |   |
|----|-------------------------|----------|---|------|--------|---|
| 18 | TIGRP2P240521_rs8763751 | 19407472 | C | 0.25 | 0.2143 | A |
| 18 | BICF2P993212            | 19417747 | G | 1    | 1      | A |
| 18 | TIGRP2P240547_rs8594416 | 19425689 | A | 1    | 1      | G |
| 18 | BICF2P1055895           | 19438974 | T | 1    | 1      | A |
| 18 | BICF2P1139758           | 19448642 | G | 1    | 1      | A |
| 18 | BICF2P1029983           | 19461558 | A | 1    | 1      | G |
| 18 | BICF2P427858            | 19470398 | A | 1    | 1      | G |
| 18 | BICF2P1311739           | 19481138 | A | 1    | 1      | C |
| 18 | BICF2P897650            | 19490088 | C | 1    | 1      | A |
| 18 | BICF2P708150            | 19493251 | G | 1    | 1      | A |
| 18 | BICF2P721844            | 19511350 | A | 1    | 1      | C |
| 18 | BICF2P1044072           | 19524159 | A | 1    | 1      | G |
| 18 | TIGRP2P240556_rs8765004 | 19525261 | A | 0    | 0      | G |
| 18 | BICF2P192840            | 19527113 | A | 1    | 1      | G |
| 18 | BICF2P1120559           | 19549592 | A | 1    | 1      | G |
| 18 | BICF2P1211380           | 19554140 | G | 1    | 1      | A |
| 18 | BICF2P1007932           | 19570431 | A | 1    | 1      | G |
| 18 | TIGRP2P240570_rs9117973 | 19591273 | A | 1    | 1      | C |
| 18 | BICF2P1203429           | 19600834 | A | 0.75 | 0.7857 | T |
| 18 | BICF2P777269            | 19609393 | 0 | 0    | 0      | A |
| 18 | BICF2S23128680          | 19623247 | A | 0.25 | 0.2143 | C |
| 18 | TIGRP2P240576_rs8587900 | 19638784 | 0 | 0    | 0      | A |
| 18 | BICF2P548118            | 19644572 | 0 | 0    | 0      | A |
| 18 | BICF2P1138992           | 19674626 | A | 0    | 0      | G |
| 18 | BICF2S23737519          | 19681007 | A | 0    | 0      | G |
| 18 | BICF2S22952633          | 19694413 | T | 1    | 1      | A |
| 18 | BICF2P733762            | 19701843 | 0 | 0    | 0      | A |
| 18 | BICF2P954081            | 19718281 | C | 1    | 1      | A |
| 18 | BICF2P764497            | 19734350 | 0 | 0    | 0      | C |
| 18 | BICF2P404633            | 19752018 | A | 1    | 1      | G |
| 18 | BICF2S23316104          | 19762114 | C | 1    | 1      | A |
| 18 | BICF2P1040686           | 19778759 | G | 1    | 1      | A |
| 18 | BICF2S23719918          | 19787176 | G | 0.25 | 0.2143 | A |
| 18 | BICF2P682580            | 19799450 | A | 0.75 | 0.7857 | G |
| 18 | BICF2P1151414           | 19811230 | G | 1    | 1      | A |
| 18 | BICF2S23141330          | 19813042 | A | 1    | 1      | T |
| 18 | TIGRP2P240594_rs8544238 | 19823820 | A | 0    | 0      | G |
| 18 | BICF2P712192            | 19826203 | A | 1    | 1      | G |
| 18 | BICF2P170231            | 19837538 | G | 1    | 1      | A |
| 18 | BICF2P1056014           | 19868217 | G | 0    | 0      | A |
| 18 | BICF2S23639409          | 19878337 | A | 0.25 | 0.2857 | G |
| 18 | BICF2S23152118          | 19894533 | G | 0    | 0      | A |
| 18 | BICF2P1132592           | 19902520 | A | 0.75 | 0.7143 | G |
| 18 | BICF2S2349314           | 19909425 | A | 0    | 0      | G |
| 18 | BICF2P409138            | 19924510 | C | 1    | 1      | A |
| 18 | BICF2S23764785          | 19938063 | G | 0.75 | 0.7143 | A |
| 18 | BICF2S23154320          | 19957729 | G | 0.75 | 0.75   | A |

|    |                         |          |   |      |        |   |
|----|-------------------------|----------|---|------|--------|---|
| 18 | BICF2S23132407          | 19982305 | 0 | 0    | 0      | C |
| 18 | BICF2S23051582          | 19988823 | 0 | 0    | 0      | C |
| 18 | BICF2S23314012          | 20014093 | T | 0.75 | 0.7143 | A |
| 18 | TIGRP2P240603_rs9200739 | 20018042 | G | 0.75 | 0.7143 | C |
| 18 | TIGRP2P240611_rs9143583 | 20023109 | A | 0.75 | 0.75   | G |
| 18 | TIGRP2P240624_rs8707425 | 20035614 | G | 0.75 | 0.7143 | A |
| 18 | BICF2S23210093          | 20046372 | A | 0.75 | 0.7143 | G |
| 18 | BICF2S23613468          | 20064710 | G | 0    | 0      | A |
| 18 | BICF2S2366559           | 20069332 | A | 0    | 0      | G |
| 18 | BICF2P353556            | 20092610 | A | 0.75 | 0.7143 | T |
| 18 | BICF2P1089541           | 20105029 | 0 | 0    | 0      | G |
| 18 | BICF2P320226            | 20121238 | 0 | 0    | 0      | G |
| 18 | BICF2P387551            | 20164432 | A | 0.5  | 0.5    | C |
| 18 | BICF2P635796            | 20195036 | A | 0.5  | 0.5    | C |
| 18 | BICF2P1338024           | 20207502 | G | 0.5  | 0.5    | A |
| 18 | BICF2S23512155          | 20223507 | G | 0.5  | 0.5    | A |
| 18 | TIGRP2P240652_rs9004887 | 20238323 | A | 0.5  | 0.5    | G |
| 18 | BICF2P869246            | 20250416 | G | 0.5  | 0.5    | A |
| 18 | BICF2P389817            | 20253882 | A | 0.5  | 0.5    | G |
| 18 | BICF2S23432518          | 20263720 | 0 | 0    | 0      | G |
| 18 | BICF2P1123870           | 20292837 | A | 0.25 | 0.2143 | G |
| 18 | TIGRP2P240674_rs9216249 | 20307248 | A | 0.5  | 0.5    | G |
| 18 | TIGRP2P240679_rs9216256 | 20309084 | A | 0.5  | 0.5    | G |
| 18 | TIGRP2P240693_rs8766779 | 20323023 | G | 0.25 | 0.2857 | A |
| 18 | TIGRP2P240709_rs8786216 | 20335065 | A | 0    | 0      | G |
| 18 | BICF2P1088889           | 20360761 | G | 0.25 | 0.2857 | A |
| 18 | BICF2P1244157           | 20371569 | C | 0.25 | 0.2857 | A |
| 18 | BICF2P389292            | 20378389 | A | 0    | 0      | G |
| 18 | BICF2P21399             | 20395857 | 0 | 0    | 0      | G |
| 18 | BICF2P357186            | 20405103 | A | 0    | 0      | G |
| 18 | TIGRP2P240736_rs8692994 | 20413750 | A | 0    | 0      | G |
| 18 | BICF2S2333289           | 20425299 | A | 0    | 0      | C |
| 18 | TIGRP2P240743_rs8905404 | 20442125 | A | 0    | 0      | G |
| 18 | BICF2P451129            | 20450224 | A | 0    | 0      | G |
| 18 | BICF2P212938            | 20465692 | A | 0.25 | 0.2143 | G |
| 18 | TIGRP2P240751_rs8687874 | 20477290 | G | 0    | 0      | A |
| 18 | BICF2P589592            | 20492720 | G | 0    | 0      | A |
| 18 | BICF2P162226            | 20498526 | A | 0    | 0      | G |
| 18 | BICF2S23435391          | 20515018 | A | 0    | 0      | C |
| 18 | BICF2S23643122          | 20525737 | A | 0    | 0      | G |
| 18 | BICF2P977593            | 20538403 | G | 0.25 | 0.2143 | A |
| 18 | BICF2P507763            | 20548446 | 0 | 0    | 0      | A |
| 18 | BICF2S23256758          | 20557220 | G | 0.25 | 0.2143 | A |
| 18 | BICF2S23526392          | 20562136 | A | 0.25 | 0.2143 | C |
| 18 | BICF2S2345119           | 20590808 | G | 0    | 0      | A |
| 18 | BICF2S23018691          | 20602463 | A | 0    | 0      | G |
| 18 | BICF2S2365314           | 20626445 | G | 0    | 0      | A |

|    |                         |          |   |      |        |   |
|----|-------------------------|----------|---|------|--------|---|
| 18 | BICF2P471957            | 20676363 | A | 0    | 0      | G |
| 18 | BICF2P107587            | 20683302 | G | 0    | 0      | A |
| 18 | BICF2P146976            | 20698153 | 0 | 0    | 0      | A |
| 18 | TIGRP2P240773_rs8796012 | 20703793 | A | 0    | 0      | G |
| 18 | BICF2S2444350           | 20713293 | G | 0    | 0      | A |
| 18 | BICF2P155823            | 20729948 | A | 0.5  | 0.5    | T |
| 18 | BICF2P827040            | 20740860 | A | 0.5  | 0.5    | G |
| 18 | TIGRP2P240797_rs8525757 | 20747344 | A | 0.5  | 0.5    | G |
| 18 | BICF2P880650            | 20759000 | A | 0.5  | 0.5    | G |
| 18 | TIGRP2P240806_rs9189732 | 20780379 | C | 0.5  | 0.5    | A |
| 18 | BICF2P1117736           | 20791235 | G | 0.5  | 0.5    | A |
| 18 | TIGRP2P240811_rs8751309 | 20793671 | G | 0.5  | 0.5    | A |
| 18 | BICF2P982145            | 20826151 | A | 0    | 0      | G |
| 18 | BICF2P899095            | 20840447 | A | 0    | 0      | C |
| 18 | BICF2P658037            | 20852336 | G | 0    | 0      | A |
| 18 | BICF2P219184            | 20863121 | A | 0    | 0      | G |
| 18 | BICF2P601965            | 20879720 | A | 0.25 | 0.1429 | G |
| 18 | TIGRP2P240838_rs9144983 | 20895740 | G | 0.25 | 0.1429 | A |
| 18 | TIGRP2P240845_rs8854733 | 20908979 | G | 0.25 | 0.1429 | A |
| 18 | BICF2P934702            | 20922464 | A | 0.75 | 0.6429 | G |
| 18 | BICF2S23428478          | 20940796 | G | 0    | 0      | A |
| 18 | BICF2S23427252          | 20944122 | A | 0.75 | 0.6429 | G |
| 18 | TIGRP2P240858_rs9079239 | 20958650 | A | 0.5  | 0.3571 | C |
| 18 | BICF2S2345577           | 20959364 | G | 0.5  | 0.3571 | C |
| 18 | TIGRP2P240862_rs8575862 | 20975090 | A | 0.25 | 0.1429 | G |
| 18 | TIGRP2P240871_rs8650356 | 20982179 | G | 0.25 | 0.1429 | A |
| 18 | BICF2S23252103          | 20987743 | A | 0    | 0      | G |
| 18 | TIGRP2P240884_rs8969090 | 21010188 | A | 0.25 | 0.1429 | G |
| 18 | TIGRP2P240886_rs8547642 | 21011090 | G | 0.25 | 0.1429 | A |
| 18 | BICF2P693226            | 21025891 | A | 0.25 | 0.2857 | C |
| 18 | BICF2S23244601          | 21035808 | A | 0    | 0      | G |
| 18 | BICF2P876133            | 21042098 | G | 0.25 | 0.2857 | A |
| 18 | BICF2P326235            | 21050769 | G | 0.75 | 0.7143 | A |
| 18 | TIGRP2P240891_rs8882663 | 21062119 | A | 0.25 | 0.2143 | G |
| 18 | BICF2P1323852           | 21078331 | G | 0    | 0      | A |
| 18 | TIGRP2P240898_rs8936206 | 21083571 | A | 0.25 | 0.2143 | G |
| 18 | BICF2P283932            | 21099731 | A | 0    | 0      | T |
| 18 | BICF2P2419              | 21102791 | A | 0    | 0      | G |
| 18 | TIGRP2P240913_rs9108110 | 21117419 | G | 1    | 1      | A |
| 18 | BICF2P1164494           | 21126610 | G | 0    | 0      | A |
| 18 | BICF2P837372            | 21137590 | A | 0.75 | 0.7857 | G |
| 18 | BICF2P755935            | 21159854 | G | 0    | 0      | A |
| 18 | BICF2S23716615          | 21164901 | G | 0.25 | 0.1667 | A |
| 18 | BICF2S22929661          | 21173578 | A | 0    | 0      | G |
| 18 | BICF2P941997            | 21183089 | C | 0    | 0      | A |
| 18 | BICF2P1356268           | 21195032 | A | 0.5  | 0.7    | C |
| 18 | BICF2S22944761          | 21239055 | C | 0    | 0      | G |

|    |                         |          |   |      |        |   |
|----|-------------------------|----------|---|------|--------|---|
| 18 | BICF2S23548465          | 21251188 | A | 0    | 0      | G |
| 18 | TIGRP2P240921_rs9223338 | 21265131 | 0 | 0    | 0      | A |
| 18 | BICF2S23411980          | 21289829 | G | 0    | 0      | A |
| 18 | BICF2P57279             | 21300151 | 0 | 0    | 0      | G |
| 18 | TIGRP2P240924_rs9115954 | 21315938 | 0 | 0    | 0      | A |
| 18 | BICF2P421670            | 21417113 | G | 0    | 0      | A |
| 18 | BICF2P16039             | 21538682 | A | 0.75 | 0.7143 | C |
| 18 | BICF2P15823             | 21540006 | A | 0.75 | 0.7143 | G |
| 18 | BICF2G630636534         | 21617483 | C | 0.5  | 0.5    | A |
| 18 | TIGRP2P34638_rs9229558  | 21620381 | 0 | 0    | 0      | A |
| 18 | BICF2S2309638           | 21844838 | A | 0    | 0      | C |
| 18 | TIGRP2P35666_rs9113469  | 21855362 | G | 0.5  | 0.4286 | A |
| 18 | BICF2P1317051           | 21861773 | A | 1    | 1      | G |
| 18 | TIGRP2P35692_rs8993236  | 21881581 | A | 0    | 0      | C |
| 18 | BICF2P1322194           | 21887434 | A | 0    | 0      | G |
| 18 | TIGRP2P35704_rs8996620  | 21903815 | A | 0    | 0      | G |
| 18 | BICF2S2295559           | 21907820 | A | 0    | 0      | G |
| 18 | BICF2P1255026           | 21920080 | A | 0.25 | 0.1429 | G |
| 18 | BICF2P1237452           | 21931982 | A | 0    | 0      | G |
| 18 | BICF2P734232            | 21947347 | A | 0    | 0      | C |
| 18 | BICF2P1036265           | 21957528 | A | 0.25 | 0.2857 | G |
| 18 | BICF2P1137358           | 21965748 | G | 0.25 | 0.1429 | A |
| 18 | BICF2P1197601           | 21980993 | 0 | 0    | 0      | A |
| 18 | BICF2P223577            | 21999171 | A | 0    | 0      | G |
| 18 | BICF2P1462836           | 22014016 | A | 0.25 | 0.3571 | C |
| 18 | BICF2P158974            | 22029927 | 0 | 0    | 0      | G |
| 18 | BICF2P908305            | 22035189 | A | 0.25 | 0.3571 | C |
| 18 | BICF2P1070576           | 22046086 | G | 0.75 | 0.7857 | A |
| 18 | BICF2S23117356          | 22086559 | G | 0.25 | 0.3571 | C |
| 18 | BICF2P436853            | 22104901 | 0 | 0    | 0      | A |
| 18 | BICF2P385731            | 22114624 | A | 0.5  | 0.4286 | C |
| 18 | BICF2P66984             | 22126642 | A | 0.5  | 0.3333 | C |
| 18 | BICF2P628167            | 22144854 | G | 0.25 | 0.2143 | A |
| 18 | TIGRP2P35724_rs8868091  | 22161437 | A | 0.5  | 0.4286 | G |
| 18 | TIGRP2P35727_rs8938421  | 22173498 | G | 0.25 | 0.2857 | A |
| 18 | BICF2S23714638          | 22188102 | A | 0.5  | 0.3571 | G |
| 18 | BICF2P334370            | 22211297 | C | 0.25 | 0.2857 | G |
| 18 | TIGRP2P35731_rs9022758  | 22227047 | A | 0.25 | 0.2857 | G |
| 18 | BICF2P218897            | 22232617 | A | 0.5  | 0.3571 | G |
| 18 | BICF2P451459            | 22243252 | A | 0    | 0      | G |
| 18 | BICF2S22946323          | 22255401 | A | 0.25 | 0.3571 | C |
| 18 | BICF2P1194805           | 22266431 | A | 0    | 0      | C |
| 18 | BICF2P1177788           | 22282318 | G | 0.25 | 0.2857 | A |
| 18 | BICF2S23513476          | 22293467 | C | 0.25 | 0.2857 | A |
| 18 | BICF2S23719931          | 22309415 | A | 0.25 | 0.1429 | C |
| 18 | BICF2S22939183          | 22317213 | A | 0.25 | 0.1429 | C |
| 18 | TIGRP2P35740_rs8998046  | 22326783 | G | 0.5  | 0.5714 | A |

|    |                        |          |   |      |        |   |
|----|------------------------|----------|---|------|--------|---|
| 18 | TIGRP2P35745_rs8544435 | 22345816 | A | 0.5  | 0.5    | G |
| 18 | BICF2P99152            | 22364519 | A | 0    | 0      | G |
| 18 | BICF2P566570           | 22368009 | A | 0.5  | 0.5    | G |
| 18 | TIGRP2P35766_rs9048781 | 22384988 | A | 0.5  | 0.5    | G |
| 18 | BICF2P487709           | 22396500 | G | 0.5  | 0.5    | A |
| 18 | BICF2P625513           | 22402226 | 0 | 0    | 0      | C |
| 18 | BICF2P69511            | 22431086 | A | 0    | 0      | C |
| 18 | BICF2P592290           | 22440424 | G | 0.75 | 0.8571 | A |
| 18 | BICF2S23018645         | 22453079 | A | 0    | 0      | G |
| 18 | TIGRP2P35805_rs9116247 | 22459587 | A | 0.75 | 0.8571 | G |
| 18 | BICF2P165780           | 22472338 | A | 1    | 1      | C |
| 18 | BICF2S2372             | 22516635 | T | 0.25 | 0.1429 | A |
| 18 | BICF2P592060           | 22526372 | 0 | 0    | 0      | A |
| 18 | TIGRP2P35814_rs8776948 | 22531888 | G | 0.25 | 0.2143 | C |
| 18 | BICF2P1177971          | 22540516 | 0 | 0    | 0      | G |
| 18 | BICF2P416370           | 22594685 | 0 | 0    | 0      | A |
| 18 | BICF2S24115230         | 22617574 | 0 | 0    | 0      | C |
| 18 | BICF2P1474077          | 22625795 | 0 | 0    | 0      | A |
| 18 | BICF2S23034775         | 22707492 | A | 0.25 | 0.1429 | G |
| 18 | BICF2P94865            | 22733701 | A | 0    | 0      | G |
| 18 | BICF2P285667           | 22738424 | 0 | 0    | 0      | C |
| 18 | BICF2P1454083          | 22756894 | A | 0.5  | 0.5    | C |
| 18 | BICF2P456154           | 22759213 | A | 0.5  | 0.5    | G |
| 18 | BICF2P221816           | 22780100 | G | 0.5  | 0.5    | A |
| 18 | BICF2P261718           | 22783819 | G | 0.5  | 0.5    | A |
| 18 | BICF2P353197           | 22802318 | C | 0.75 | 0.8571 | A |
| 18 | BICF2P915830           | 22808846 | G | 0.25 | 0.1429 | A |
| 18 | BICF2P317042           | 22821911 | C | 1    | 0.9167 | A |
| 18 | BICF2P95051            | 22828410 | A | 0.25 | 0.1429 | G |
| 18 | BICF2P207337           | 22847081 | C | 0.25 | 0.1429 | A |
| 18 | BICF2P686              | 22851386 | A | 0.25 | 0.1429 | G |
| 18 | BICF2S23661355         | 22867304 | G | 0.25 | 0.1429 | A |
| 18 | BICF2S2328870          | 22874440 | A | 0.25 | 0.1429 | G |
| 18 | BICF2P1165485          | 22889448 | A | 0    | 0      | G |
| 18 | BICF2S23023938         | 22910433 | G | 0.75 | 0.6429 | A |
| 18 | TIGRP2P35845_rs8734303 | 22924256 | A | 0.75 | 0.6429 | G |
| 18 | BICF2P260118           | 22931481 | A | 0    | 0      | G |
| 18 | BICF2P1026132          | 22949505 | G | 0    | 0      | A |
| 18 | BICF2P24540            | 22972548 | A | 0    | 0      | G |
| 18 | BICF2P891868           | 22980646 | 0 | 0    | 0      | A |
| 18 | BICF2P232313           | 22990178 | 0 | 0    | 0      | G |
| 18 | BICF2P1460813          | 23001366 | A | 0.25 | 0.3571 | G |
| 18 | BICF2S23748209         | 23025717 | A | 0    | 0      | G |
| 18 | BICF2S23532367         | 23039336 | G | 0.25 | 0.1667 | A |
| 18 | BICF2P991028           | 23048464 | A | 0    | 0      | G |
| 18 | BICF2P278537           | 23073043 | A | 0    | 0      | G |
| 18 | BICF2P740731           | 23085786 | 0 | 0    | 0      | A |

|    |                         |          |   |      |        |   |
|----|-------------------------|----------|---|------|--------|---|
| 18 | BICF2S2339350           | 23106621 | A | 0.75 | 0.6429 | G |
| 18 | BICF2S23348607          | 23130080 | G | 0.75 | 0.6429 | A |
| 18 | BICF2P324400            | 23142189 | 0 | 0    | 0      | A |
| 18 | BICF2P343768            | 23151628 | A | 0    | 0      | G |
| 18 | BICF2S22954784          | 23178883 | A | 0    | 0      | G |
| 18 | BICF2P372214            | 23186482 | 0 | 0    | 0      | A |
| 18 | BICF2S2353076           | 23216933 | 0 | 0    | 0      | T |
| 18 | BICF2P348367            | 23233836 | 0 | 0    | 0      | A |
| 18 | BICF2P787813            | 23243649 | 0 | 0    | 0      | A |
| 18 | BICF2S23615757          | 23260370 | C | 0    | 0      | A |
| 18 | BICF2P423752            | 23273568 | 0 | 0    | 0      | A |
| 18 | BICF2P962498            | 23287316 | A | 0    | 0      | C |
| 18 | BICF2S2323033           | 23298242 | C | 0    | 0      | A |
| 18 | TIGRP2P246430_rs8766367 | 23308549 | A | 0    | 0      | G |
| 18 | BICF2S22935597          | 23318625 | G | 0    | 0      | A |
| 18 | TIGRP2P246426_rs8800230 | 23329934 | G | 0.25 | 0.3333 | A |
| 18 | TIGRP2P246424_rs8708026 | 23335392 | T | 0.25 | 0.3571 | A |
| 18 | BICF2P1299006           | 23354819 | A | 0.25 | 0.2143 | G |
| 18 | TIGRP2P246414_rs9167852 | 23362019 | A | 0.25 | 0.2143 | G |
| 18 | TIGRP2P246410_rs8571920 | 23373256 | C | 0.5  | 0.4286 | A |
| 18 | BICF2S23225324          | 23405199 | A | 0    | 0      | G |
| 18 | BICF2P825189            | 23411826 | C | 0    | 0      | G |
| 18 | TIGRP2P246405_rs8846975 | 23436349 | 0 | 0    | 0      | G |
| 18 | BICF2P1191309           | 23443867 | C | 0.5  | 0.4286 | A |
| 18 | BICF2S23647370          | 23462573 | A | 0.75 | 0.8333 | G |
| 18 | BICF2S2341828           | 23500157 | G | 1    | 1      | A |
| 18 | BICF2P674440            | 23533911 | 0 | 0    | 0      | A |
| 18 | BICF2S23325547          | 23544589 | A | 0.25 | 0.2857 | G |
| 18 | TIGRP2P246385_rs9200937 | 23558274 | G | 0.5  | 0.5    | A |
| 18 | BICF2P551459            | 23563724 | G | 0.25 | 0.2857 | A |
| 18 | BICF2P782599            | 23578963 | G | 0.5  | 0.5714 | A |
| 18 | BICF2P1159330           | 23587069 | G | 0.75 | 0.8571 | C |
| 18 | BICF2P710475            | 23592550 | 0 | 0    | 0      | A |
| 18 | BICF2S2342561           | 23606935 | A | 0    | 0      | T |
| 18 | BICF2S23250630          | 23609741 | G | 0.25 | 0.1429 | A |
| 18 | BICF2P362142            | 23631352 | 0 | 0    | 0      | A |
| 18 | TIGRP2P246378_rs8794859 | 23634708 | 0 | 0    | 0      | G |
| 18 | BICF2P831243            | 23648084 | 0 | 0    | 0      | A |
| 18 | BICF2P693716            | 23667220 | G | 0    | 0      | A |
| 18 | BICF2P1070496           | 23678753 | A | 0.5  | 0.3571 | T |
| 18 | BICF2P347626            | 23691525 | A | 0.5  | 0.5714 | G |
| 18 | BICF2P1339708           | 23706033 | A | 0    | 0      | G |
| 18 | BICF2P112943            | 23722397 | G | 0.5  | 0.4286 | A |
| 18 | TIGRP2P246355_rs8548283 | 23729786 | G | 0.25 | 0.2143 | A |
| 18 | BICF2P304194            | 23740933 | A | 0.25 | 0.2143 | G |
| 18 | BICF2P617203            | 23747816 | C | 0.25 | 0.3571 | A |
| 18 | TIGRP2P246339_rs8947925 | 23763294 | G | 0.5  | 0.4286 | A |



|    |                         |          |   |      |        |   |
|----|-------------------------|----------|---|------|--------|---|
| 18 | BICF2P1263003           | 23790907 | G | 0.25 | 0.3571 | A |
| 18 | BICF2P460203            | 23795068 | G | 0.75 | 0.6429 | A |
| 18 | BICF2P1240627           | 23815093 | C | 0.5  | 0.4286 | G |
| 18 | BICF2S23618703          | 23820403 | G | 0.25 | 0.1429 | A |
| 18 | BICF2P1286064           | 23835938 | A | 0    | 0      | C |
| 18 | TIGRP2P246305_rs8568486 | 23841347 | G | 0.25 | 0.3571 | A |
| 18 | BICF2P1382093           | 23851118 | A | 0.25 | 0.2857 | G |
| 18 | TIGRP2P246272_rs8918048 | 23864835 | A | 0.25 | 0.25   | G |
| 18 | BICF2P312852            | 23878724 | A | 0    | 0      | G |
| 18 | BICF2P472813            | 23892742 | G | 0    | 0      | A |
| 18 | BICF2P667608            | 23897701 | G | 0    | 0      | A |
| 18 | TIGRP2P246265_rs8599150 | 23913307 | A | 0.5  | 0.3333 | C |
| 18 | BICF2P387896            | 23961592 | A | 0.25 | 0.3571 | G |
| 18 | BICF2P816412            | 23967792 | A | 0.75 | 0.6429 | G |
| 18 | BICF2S23249215          | 23986246 | A | 0    | 0      | G |
| 18 | TIGRP2P246256_rs8976281 | 23992099 | G | 0.25 | 0.2143 | A |
| 18 | BICF2S23759355          | 24016029 | C | 0    | 0      | A |
| 18 | TIGRP2P246237_rs8933738 | 24027590 | G | 0    | 0      | C |
| 18 | BICF2S2369308           | 24036356 | C | 0.25 | 0.2143 | A |
| 18 | BICF2P1004336           | 24049231 | A | 0    | 0      | G |
| 18 | BICF2P953597            | 24060632 | A | 0.25 | 0.2143 | G |
| 18 | TIGRP2P246201_rs9031127 | 24080638 | A | 0    | 0      | G |
| 18 | TIGRP2P246194_rs9245685 | 24085894 | A | 0.25 | 0.2857 | C |
| 18 | TIGRP2P246190_rs9174788 | 24095944 | 0 | 0    | 0      | G |
| 18 | BICF2P461948            | 24117717 | C | 0.5  | 0.5    | G |
| 18 | TIGRP2P246182_rs8622046 | 24133243 | 0 | 0    | 0      | G |
| 18 | BICF2P673826            | 24148000 | 0 | 0    | 0      | A |
| 18 | BICF2P1147778           | 24150747 | A | 0.25 | 0.1429 | G |
| 18 | BICF2S23453343          | 24164120 | G | 0.25 | 0.2143 | A |
| 18 | BICF2P176885            | 24177083 | 0 | 0    | 0      | G |
| 18 | BICF2S2334754           | 24190929 | T | 0.25 | 0.1429 | A |
| 18 | BICF2S2304806           | 24216138 | G | 0.25 | 0.1429 | A |
| 18 | BICF2P257960            | 24229256 | 0 | 0    | 0      | C |
| 18 | BICF2P5706              | 24241951 | G | 0.5  | 0.4286 | A |
| 18 | BICF2P1337740           | 24247620 | A | 0.5  | 0.4286 | G |
| 18 | BICF2P1175159           | 24269709 | C | 0    | 0      | A |
| 18 | BICF2P620994            | 24283550 | 0 | 0    | 0      | G |
| 18 | BICF2G630635895         | 24293961 | 0 | 0    | 0      | G |
| 18 | BICF2S23422653          | 24310010 | A | 0.25 | 0.2143 | G |
| 18 | BICF2S2337735           | 24319102 | G | 0.5  | 0.4167 | A |
| 18 | BICF2P1158231           | 24332250 | T | 0    | 0.1429 | A |
| 18 | BICF2P814429            | 24345306 | 0 | 0    | 0      | A |
| 18 | BICF2P1199237           | 24378873 | 0 | 0    | 0      | A |
| 18 | BICF2S23533882          | 24380689 | G | 0.75 | 0.7857 | A |
| 18 | TIGRP2P246174_rs8643714 | 24394250 | C | 0.75 | 0.7857 | A |
| 18 | BICF2P792715            | 24403792 | C | 0.25 | 0.2143 | A |
| 18 | TIGRP2P246173_rs9083463 | 24409707 | A | 0    | 0      | G |

|    |                         |          |   |      |        |   |
|----|-------------------------|----------|---|------|--------|---|
| 18 | BICF2P197540            | 24420328 | A | 0    | 0      | G |
| 18 | BICF2P706073            | 24430674 | A | 1    | 1      | G |
| 18 | BICF2P527971            | 24438801 | A | 1    | 1      | G |
| 18 | BICF2S2297045           | 24454281 | G | 1    | 1      | A |
| 18 | TIGRP2P246144_rs8929858 | 24471816 | G | 0.5  | 0.5    | A |
| 18 | BICF2S23121708          | 24480337 | G | 0.75 | 0.7857 | A |
| 18 | BICF2S2415275           | 24496093 | A | 0.25 | 0.2857 | G |
| 18 | BICF2P573283            | 24540174 | G | 0.5  | 0.5    | A |
| 18 | TIGRP2P246126_rs8618267 | 24552307 | 0 | 0    | 0      | G |
| 18 | BICF2P239224            | 24564514 | A | 0.5  | 0.5    | G |
| 18 | BICF2P842492            | 24576121 | A | 0.75 | 0.7143 | G |
| 18 | BICF2P1260127           | 24593304 | A | 0.75 | 0.7143 | G |
| 18 | BICF2P1089908           | 24601562 | C | 0.75 | 0.75   | A |
| 18 | BICF2P126189            | 24620211 | 0 | 0    | 0      | A |
| 18 | BICF2P225938            | 24624090 | A | 0.75 | 0.7143 | C |
| 18 | TIGRP2P246102_rs9033652 | 24637007 | A | 1    | 1      | C |
| 18 | TIGRP2P246088_rs8994262 | 24649373 | 0 | 0    | 0      | A |
| 18 | TIGRP2P246087_rs8750577 | 24666912 | 0 | 0    | 0      | A |
| 18 | BICF2P1045088           | 24676500 | 0 | 0    | 0      | A |
| 18 | BICF2P106429            | 24684183 | A | 0    | 0      | G |
| 18 | BICF2P283769            | 24697596 | A | 0    | 0      | G |
| 18 | TIGRP2P246074_rs8619134 | 24712936 | G | 0    | 0      | A |
| 18 | TIGRP2P246072_rs8998985 | 24719462 | G | 0.5  | 0.5    | A |
| 18 | BICF2S2347943           | 24727927 | G | 0.25 | 0.2857 | A |
| 18 | TIGRP2P246071_rs9011747 | 24737569 | A | 0.25 | 0.3571 | G |
| 18 | TIGRP2P246066_rs8647081 | 24755716 | A | 0.5  | 0.5    | C |
| 18 | BICF2P324883            | 24763368 | C | 0.25 | 0.2857 | A |
| 18 | BICF2P523774            | 24776073 | A | 0.5  | 0.5    | G |
| 18 | BICF2P512786            | 24791338 | 0 | 0    | 0      | A |
| 18 | TIGRP2P246057_rs8779411 | 24798811 | G | 0.25 | 0.2857 | A |
| 18 | BICF2P808566            | 24810862 | C | 0.5  | 0.5    | A |
| 18 | BICF2P1077522           | 24825424 | 0 | 0    | 0      | A |
| 18 | BICF2P635648            | 24835978 | A | 0    | 0      | G |
| 18 | TIGRP2P246033_rs9097571 | 24843043 | 0 | 0    | 0      | A |
| 18 | TIGRP2P246032_rs8893981 | 24844109 | A | 0    | 0      | G |
| 18 | BICF2P126249            | 24853143 | G | 0    | 0      | A |
| 18 | BICF2S2297559           | 24870421 | C | 0.25 | 0.3571 | A |
| 18 | TIGRP2P246028_rs8783940 | 24874870 | A | 0.25 | 0.3571 | G |
| 18 | BICF2P1268355           | 24889268 | A | 0.5  | 0.6429 | T |
| 18 | BICF2P1440628           | 24898341 | 0 | 0    | 0      | A |
| 18 | BICF2P425749            | 24913361 | A | 0.5  | 0.6429 | G |
| 18 | BICF2P337113            | 24921303 | A | 1    | 0.4167 | G |
| 18 | BICF2P425820            | 24938152 | A | 0.5  | 0.3571 | G |
| 18 | BICF2P455917            | 24948010 | C | 0.5  | 0.3571 | A |
| 18 | TIGRP2P246010_rs8638513 | 24960558 | A | 0.5  | 0.5714 | C |
| 18 | BICF2P738983            | 24969257 | A | 0    | 0      | G |
| 18 | BICF2P1124794           | 24984872 | C | 0.25 | 0.3571 | A |

|    |                         |          |   |      |        |   |
|----|-------------------------|----------|---|------|--------|---|
| 18 | BICF2P1124789           | 24986710 | C | 0.25 | 0.3571 | A |
| 18 | BICF2S2375778           | 24990072 | A | 0.5  | 0.5    | G |
| 18 | BICF2P156830            | 25002154 | A | 0.75 | 0.8571 | G |
| 18 | BICF2S23217746          | 25015580 | 0 | 0    | 0      | G |
| 18 | BICF2P232321            | 25032224 | A | 0    | 0      | G |
| 18 | TIGRP2P246005_rs8658067 | 25038271 | A | 0.25 | 0.2857 | C |
| 18 | TIGRP2P246003_rs8671363 | 25068795 | A | 0.75 | 0.8571 | G |
| 18 | BICF2S2304363           | 25079453 | 0 | 0    | 0      | A |
| 18 | BICF2P1094775           | 25083445 | T | 0    | 0      | A |
| 18 | BICF2S23620050          | 25094285 | G | 0    | 0      | A |
| 18 | BICF2S23740990          | 25115135 | C | 0    | 0      | A |
| 18 | BICF2S2431873           | 25128675 | G | 0    | 0      | A |
| 18 | TIGRP2P245945_rs9018538 | 25148377 | 0 | 0    | 0      | A |
| 18 | TIGRP2P245937_rs8615377 | 25156223 | A | 0.25 | 0.1429 | G |
| 18 | BICF2P64220             | 25162247 | A | 0    | 0      | G |
| 18 | BICF2P1095631           | 25174191 | C | 0    | 0      | A |
| 18 | TIGRP2P245904_rs9244273 | 25187415 | A | 0    | 0      | G |
| 18 | BICF2P971494            | 25202711 | G | 0.5  | 0.4286 | A |
| 18 | BICF2S22944533          | 25229413 | A | 0.5  | 0.4286 | G |
| 18 | TIGRP2P245893_rs8616245 | 25244760 | A | 0.25 | 0.2143 | C |
| 18 | BICF2P1374887           | 25264046 | G | 0.25 | 0.2143 | A |
| 18 | TIGRP2P245883_rs8649122 | 25287716 | A | 0.5  | 0.4286 | G |
| 18 | BICF2P1239148           | 25289056 | A | 0.5  | 0.4286 | C |
| 18 | TIGRP2P245868_rs8617072 | 25308453 | A | 0.25 | 0.2143 | G |
| 18 | BICF2S22952655          | 25322707 | A | 0.25 | 0.2857 | G |
| 18 | BICF2P573088            | 25324934 | T | 0.75 | 0.7857 | A |
| 18 | BICF2P60770             | 25338475 | G | 0.5  | 0.5    | A |
| 18 | BICF2P939687            | 25355972 | A | 0.5  | 0.5    | G |
| 18 | BICF2P884050            | 25359739 | 0 | 0    | 0      | A |
| 18 | BICF2P1403656           | 25374114 | G | 0.25 | 0.2143 | A |
| 18 | BICF2S23652096          | 25385916 | A | 0    | 0      | C |
| 18 | BICF2S23424434          | 25396141 | A | 0.75 | 0.8571 | G |
| 18 | TIGRP2P245842_rs9126657 | 25414824 | C | 0.75 | 0.8571 | A |
| 18 | TIGRP2P245841_rs8951511 | 25416001 | G | 0.25 | 0.2143 | A |
| 18 | TIGRP2P245836_rs8835217 | 25437747 | A | 0.25 | 0.2143 | G |
| 18 | BICF2P124671            | 25440395 | 0 | 0    | 0      | G |
| 18 | BICF2S23742962          | 25457425 | A | 0.5  | 0.5    | G |
| 18 | TIGRP2P245824_rs8664446 | 25468973 | G | 0.5  | 0.5714 | A |
| 18 | BICF2P1325569           | 25476093 | G | 0.75 | 0.8571 | A |
| 18 | BICF2P1359352           | 25488478 | C | 0.5  | 0.5714 | A |
| 18 | BICF2S23720338          | 25508579 | G | 0    | 0      | A |
| 18 | BICF2S23248047          | 25520612 | G | 0.25 | 0.1429 | A |
| 18 | BICF2P232896            | 25532778 | A | 0.5  | 0.3571 | C |
| 18 | BICF2P514668            | 25546832 | A | 0.5  | 0.6429 | G |
| 18 | BICF2P1093040           | 25561119 | T | 0.25 | 0.1429 | A |
| 18 | TIGRP2P245786_rs9079938 | 25572847 | A | 0.5  | 0.3571 | G |
| 18 | BICF2P1369844           | 25578518 | A | 0    | 0      | C |

|    |                         |          |   |      |        |   |
|----|-------------------------|----------|---|------|--------|---|
| 18 | BICF2P1412682           | 25587945 | A | 0.5  | 0.6667 | G |
| 18 | BICF2P1148375           | 25603905 | A | 0.5  | 0.6429 | G |
| 18 | BICF2P1253093           | 25607708 | A | 0    | 0      | G |
| 18 | BICF2P803978            | 25620857 | G | 0.5  | 0.6429 | A |
| 18 | TIGRP2P245762_rs8893806 | 25622208 | A | 0.5  | 0.6429 | T |
| 18 | BICF2P244301            | 25639098 | 0 | 0    | 0      | A |
| 18 | TIGRP2P245760_rs8920035 | 25647965 | A | 0.25 | 0.1429 | G |
| 18 | TIGRP2P245756_rs8607275 | 25666528 | 0 | 0    | 0      | C |
| 18 | BICF2P234147            | 25675905 | G | 0    | 0      | A |
| 18 | TIGRP2P245753_rs8854029 | 25684865 | A | 0.5  | 0.3571 | G |
| 18 | BICF2P156323            | 25700839 | A | 0.25 | 0.1429 | G |
| 18 | BICF2S23755894          | 25706201 | A | 0.5  | 0.6429 | G |
| 18 | BICF2P721776            | 25714771 | A | 0.5  | 0.6429 | C |
| 18 | BICF2P1133478           | 25736018 | A | 0    | 0      | G |
| 18 | BICF2S23111835          | 25737970 | A | 0    | 0      | G |
| 18 | BICF2P703658            | 25754564 | 0 | 0    | 0      | G |
| 18 | BICF2P569645            | 25761670 | G | 1    | 1      | A |
| 18 | TIGRP2P245729_rs9213430 | 25772236 | 0 | 0    | 0      | G |
| 18 | TIGRP2P245728_rs9094993 | 25790849 | A | 1    | 1      | G |
| 18 | BICF2P1408552           | 25799092 | 0 | 0    | 0      | T |
| 18 | BICF2P355922            | 25817267 | A | 0    | 0      | G |
| 18 | TIGRP2P245717_rs8842505 | 25825609 | A | 1    | 1      | G |
| 18 | BICF2S23656847          | 25832915 | A | 0    | 0      | G |
| 18 | BICF2P660791            | 25841111 | A | 0    | 0      | G |
| 18 | BICF2S23223492          | 25849027 | T | 0.5  | 0.6429 | A |
| 18 | BICF2P1283192           | 25858903 | A | 0.5  | 0.3571 | G |
| 18 | BICF2P673458            | 25863017 | C | 0.5  | 0.6429 | A |
| 18 | BICF2P1060169           | 25886344 | A | 0.25 | 0.1429 | G |
| 18 | BICF2P745573            | 25887135 | A | 0.5  | 0.6429 | G |
| 18 | BICF2P909059            | 25900992 | A | 0.5  | 0.6429 | G |
| 18 | BICF2P443650            | 25924365 | G | 0.25 | 0.1429 | A |
| 18 | BICF2P488325            | 25944658 | C | 0.5  | 0.6429 | A |
| 18 | BICF2P368901            | 25963830 | A | 0.25 | 0.2143 | G |
| 18 | BICF2P27600             | 25969807 | A | 0.25 | 0.1429 | G |
| 18 | BICF2P134266            | 25978962 | A | 0.5  | 0.3571 | G |
| 18 | G1021f52S199            | 26009745 | C | 0.25 | 0.1429 | A |
| 18 | TIGRP2P245630_rs8691818 | 26013432 | 0 | 0    | 0      | A |
| 18 | BICF2P1326486           | 26034775 | 0 | 0    | 0      | A |
| 18 | BICF2S22946449          | 26038776 | A | 0.75 | 0.7857 | G |
| 18 | BICF2P410649            | 26055247 | G | 1    | 1      | A |
| 18 | BICF2P93446             | 26066128 | G | 0.25 | 0.2143 | A |
| 18 | BICF2P475745            | 26072978 | A | 0.25 | 0.2143 | G |
| 18 | TIGRP2P245619_rs8575907 | 26085716 | A | 0    | 0      | C |
| 18 | BICF2P1241809           | 26102191 | 0 | 0    | 0      | G |
| 18 | BICF2S23640320          | 26110519 | A | 0    | 0      | G |
| 18 | BICF2P415900            | 26121674 | A | 0    | 0      | C |
| 18 | BICF2P278995            | 26134574 | A | 0.5  | 0.6429 | G |

|    |                         |          |   |      |        |   |
|----|-------------------------|----------|---|------|--------|---|
| 18 | BICF2S22959197          | 26140909 | A | 0.5  | 0.6429 | G |
| 18 | BICF2P682240            | 26152720 | A | 0.75 | 0.7857 | G |
| 18 | TIGRP2P245607_rs9064152 | 26165091 | C | 0.25 | 0.1429 | A |
| 18 | TIGRP2P245594_rs9013469 | 26183793 | A | 0.25 | 0.2143 | G |
| 18 | BICF2P1421206           | 26194427 | A | 0.25 | 0.2143 | G |
| 18 | BICF2S23320857          | 26197044 | C | 0.25 | 0.2143 | A |
| 18 | TIGRP2P245585_rs8581287 | 26214401 | C | 0.25 | 0.1429 | A |
| 18 | BICF2S23129374          | 26230844 | A | 0    | 0      | C |
| 18 | BICF2P891669            | 26237999 | G | 0.25 | 0.2143 | A |
| 18 | BICF2P905189            | 26262656 | 0 | 0    | 0      | A |
| 18 | BICF2P959337            | 26282057 | A | 0.5  | 0.3571 | T |
| 18 | TIGRP2P245548_rs8976311 | 26297357 | A | 0    | 0      | G |
| 18 | TIGRP2P245544_rs8819919 | 26304449 | A | 0    | 0      | G |
| 18 | TIGRP2P245537_rs9250547 | 26321371 | G | 0.25 | 0.1429 | A |
| 18 | BICF2P126678            | 26324899 | G | 0.25 | 0.1429 | C |
| 18 | BICF2P553407            | 26342199 | G | 0.25 | 0.1429 | A |
| 18 | BICF2P1353640           | 26354621 | A | 0.25 | 0.1429 | C |
| 18 | BICF2P1465635           | 26358088 | G | 0    | 0      | A |
| 18 | TIGRP2P245533_rs8541299 | 26372596 | A | 0    | 0      | G |
| 18 | BICF2P1038324           | 26390881 | A | 0.25 | 0.1429 | G |
| 18 | BICF2P523341            | 26392700 | A | 0.25 | 0.1429 | G |
| 18 | BICF2S23635083          | 26411929 | A | 0.5  | 0.5    | G |
| 18 | BICF2S23636180          | 26416125 | A | 0.5  | 0.5    | G |
| 18 | BICF2P109822            | 26434647 | A | 0    | 0      | G |
| 18 | BICF2P197216            | 26441144 | C | 0.5  | 0.5    | A |
| 18 | BICF2P1189855           | 26453352 | A | 0.25 | 0.2857 | G |
| 18 | BICF2P533766            | 26468274 | A | 0.25 | 0.2857 | C |
| 18 | BICF2S2339890           | 26477476 | A | 0.25 | 0.2857 | G |
| 18 | BICF2P13382             | 26492526 | A | 0.25 | 0.2857 | G |
| 18 | BICF2P201422            | 26503430 | A | 0.25 | 0.2857 | G |
| 18 | BICF2P1097520           | 26515462 | C | 0    | 0      | A |
| 18 | BICF2P309730            | 26528922 | G | 0    | 0      | A |
| 18 | BICF2P932329            | 26538537 | C | 0.5  | 0.4286 | A |
| 18 | BICF2S23319073          | 26545053 | G | 0.5  | 0.4286 | A |
| 18 | BICF2S23125289          | 26554260 | G | 0.5  | 0.4286 | A |
| 18 | BICF2P263188            | 26565593 | G | 0.25 | 0.3571 | A |
| 18 | TIGRP2P245487_rs9161435 | 26583305 | A | 0.25 | 0.2857 | G |
| 18 | BICF2S23440466          | 26591536 | A | 0.5  | 0.5714 | G |
| 18 | TIGRP2P245479_rs8538528 | 26606511 | A | 0.75 | 0.7143 | C |
| 18 | BICF2P535061            | 26617121 | 0 | 0    | 0      | A |
| 18 | TIGRP2P245476_rs8768787 | 26627438 | G | 0.5  | 0.4286 | A |
| 18 | TIGRP2P245473_rs8568436 | 26643716 | A | 0.5  | 0.6429 | G |
| 18 | BICF2P948980            | 26650375 | G | 0.75 | 0.6429 | A |
| 18 | BICF2P1106097           | 26659957 | A | 0.25 | 0.3571 | T |
| 18 | BICF2P262265            | 26680444 | G | 0.5  | 0.5714 | A |
| 18 | BICF2P393324            | 26701254 | A | 0.75 | 0.75   | G |
| 18 | BICF2S22950726          | 26713657 | G | 0    | 0      | A |

|    |                         |          |   |      |        |   |
|----|-------------------------|----------|---|------|--------|---|
| 18 | TIGRP2P245442_rs8527257 | 26716506 | 0 | 0    | 0      | G |
| 18 | TIGRP2P245423_rs8687809 | 26726678 | A | 0.25 | 0.2857 | C |
| 18 | BICF2P1332877           | 26737894 | A | 0.25 | 0.2143 | G |
| 18 | TIGRP2P245397_rs9008756 | 26754077 | A | 0.5  | 0.4286 | G |
| 18 | BICF2P724131            | 26768481 | A | 0.75 | 0.7143 | G |
| 18 | BICF2P421419            | 26774925 | A | 1    | 1      | G |
| 18 | BICF2P18499             | 26787958 | A | 0.25 | 0.2857 | G |
| 18 | BICF2P574748            | 26801485 | 0 | 0    | 0      | G |
| 18 | BICF2P769421            | 26821503 | A | 0.25 | 0.2857 | C |
| 18 | BICF2S23451321          | 26838768 | 0 | 0    | 0      | G |
| 18 | BICF2P594247            | 26845886 | G | 0.25 | 0.2857 | A |
| 18 | BICF2P1080362           | 26855629 | 0 | 0    | 0      | G |
| 18 | BICF2S23342280          | 26866677 | A | 0.25 | 0.3571 | G |
| 18 | BICF2P1092161           | 26889811 | G | 1    | 1      | A |
| 18 | BICF2S22942878          | 26904908 | G | 0.75 | 0.7143 | A |
| 18 | TIGRP2P245368_rs8981402 | 26914722 | G | 0.75 | 0.7857 | A |
| 18 | BICF2P757994            | 26929723 | G | 0    | 0      | A |
| 18 | BICF2P907394            | 26936606 | G | 0.25 | 0.2143 | A |
| 18 | BICF2P1315750           | 26947577 | A | 0.25 | 0.2143 | G |
| 18 | BICF2P1049711           | 26958103 | C | 0    | 0.1667 | A |
| 18 | BICF2S23027741          | 26975976 | A | 0.25 | 0.3571 | C |
| 18 | BICF2S23346216          | 26989559 | 0 | 0    | 0      | A |
| 18 | BICF2P937483            | 27003717 | C | NA   | 0.5    | A |
| 18 | BICF2S2309636           | 27034564 | 0 | 0    | 0      | A |
| 18 | TIGRP2P245342_rs9142870 | 27042915 | G | 0.25 | 0.2143 | A |
| 18 | TIGRP2P245331_rs9099158 | 27052059 | G | 0.25 | 0.2143 | A |
| 18 | TIGRP2P245329_rs8666422 | 27070505 | A | 0.25 | 0.2143 | G |
| 18 | BICF2P1210132           | 27072210 | C | 0.25 | 0.2143 | A |
| 18 | BICF2P285236            | 27090653 | 0 | 0    | 0      | A |
| 18 | BICF2P556873            | 27124489 | C | 0    | 0      | G |
| 18 | BICF2P913934            | 27128953 | A | 0    | 0      | G |
| 18 | BICF2P909370            | 27151411 | 0 | 0    | 0      | A |
| 18 | TIGRP2P245324_rs8668574 | 27155113 | G | 0    | 0      | A |
| 18 | BICF2S2412833           | 27163521 | 0 | 0    | 0      | G |
| 18 | BICF2S23355941          | 27183579 | 0 | 0    | 0      | G |
| 18 | BICF2P1006041           | 27187128 | A | 0.5  | 0.5    | G |
| 18 | BICF2P736921            | 27199760 | A | 0    | 0      | G |
| 18 | BICF2P352260            | 27221112 | A | 0    | 0      | G |
| 18 | BICF2P234452            | 27238995 | C | 0    | 0      | A |
| 18 | BICF2P1323041           | 27277562 | A | 0    | 0      | G |
| 18 | BICF2P466492            | 27283238 | G | 0    | 0      | A |
| 18 | BICF2P1428249           | 27294112 | A | 0    | 0      | G |
| 18 | BICF2P1170858           | 27303031 | A | 0    | 0      | G |
| 18 | BICF2P237493            | 27314021 | 0 | 0    | 0      | G |
| 18 | BICF2S22932373          | 27356864 | C | 0    | 0      | A |
| 18 | BICF2S22932586          | 27360922 | 0 | 0    | 0      | A |
| 18 | BICF2P347561            | 27371867 | A | 0    | 0      | G |

|    |                         |          |   |      |        |   |
|----|-------------------------|----------|---|------|--------|---|
| 18 | BICF2S23332563          | 27398851 | G | 0    | 0      | A |
| 18 | TIGRP2P245317_rs8668225 | 27415687 | A | 1    | 1      | G |
| 18 | TIGRP2P245308_rs8668227 | 27416282 | A | 1    | 1      | G |
| 18 | TIGRP2P245307_rs8940837 | 27430306 | G | 1    | 1      | A |
| 18 | BICF2P1401280           | 27444000 | 0 | 0    | 0      | A |
| 18 | BICF2S22940162          | 27457142 | G | 1    | 1      | A |
| 18 | BICF2P785303            | 27463355 | C | 0.5  | 0.5    | A |
| 18 | BICF2P1181266           | 27486873 | 0 | 0    | 0      | A |
| 18 | BICF2S24411580          | 27502445 | A | 0    | 0      | G |
| 18 | BICF2S23511992          | 27532345 | 0 | 0    | 0      | C |
| 18 | BICF2P1092769           | 27545738 | G | 0.5  | 0.5    | A |
| 18 | BICF2S23143440          | 27555064 | C | 0.5  | 0.5    | A |
| 18 | TIGRP2P245302_rs8563166 | 27565616 | 0 | 0    | 0      | G |
| 18 | TIGRP2P245300_rs8950556 | 27579220 | G | 0.5  | 0.5    | A |
| 18 | BICF2S2411799           | 27590826 | G | 0.5  | 0.5    | A |
| 18 | BICF2S23620839          | 27601618 | A | 0.5  | 0.5    | G |
| 18 | BICF2P453748            | 27613912 | 0 | 0    | 0      | A |
| 18 | BICF2S23137267          | 27625389 | G | 0.5  | 0.5    | A |
| 18 | BICF2P1333141           | 27636108 | A | 0.5  | 0.5    | T |
| 18 | TIGRP2P245281_rs9047743 | 27647303 | A | 0.5  | 0.5    | G |
| 18 | BICF2P16933             | 27668759 | C | 0.5  | 0.5    | A |
| 18 | BICF2P1193127           | 27676461 | 0 | 0    | 0      | C |
| 18 | BICF2P364743            | 27685264 | G | 0    | 0.2857 | A |
| 18 | TIGRP2P245265_rs8559629 | 27692060 | G | 0.25 | 0.2857 | A |
| 18 | BICF2P154289            | 27710665 | G | 0.5  | 0.5    | A |
| 18 | BICF2P348834            | 27723452 | G | 0.5  | 0.5    | A |
| 18 | BICF2P1080092           | 27733639 | G | 0.5  | 0.5    | A |
| 18 | BICF2P332267            | 27741983 | G | 0.5  | 0.5    | C |
| 18 | BICF2P783856            | 27750761 | A | 0    | 0      | G |
| 18 | BICF2P950033            | 27761321 | A | 0.75 | 0.7857 | G |
| 18 | BICF2P782198            | 27777213 | A | 0.75 | 0.7857 | G |
| 18 | BICF2P312153            | 27787473 | A | 0.75 | 0.7857 | G |
| 18 | BICF2S23510974          | 27802755 | A | 0    | 0      | G |
| 18 | BICF2P1036706           | 27807508 | G | 0.75 | 0.7143 | A |
| 18 | TIGRP2P245236_rs8831615 | 27828362 | A | 0.25 | 0.2857 | G |
| 18 | BICF2S23316783          | 27832518 | A | 0.75 | 0.7143 | G |
| 18 | BICF2P1281463           | 27841629 | G | 0.75 | 0.7143 | C |
| 18 | TIGRP2P245233_rs9225889 | 27860456 | 0 | 0    | 0      | G |
| 18 | BICF2P1062778           | 27881859 | A | 0.5  | 0.5    | G |
| 18 | BICF2P401870            | 27891844 | C | 0.5  | 0.5    | A |
| 18 | BICF2P414381            | 27901594 | A | 0.25 | 0.2857 | G |
| 18 | BICF2P1364353           | 27920581 | C | 0.25 | 0.2857 | A |
| 18 | TIGRP2P245231_rs8671188 | 27922860 | 0 | 0    | 0      | A |
| 18 | BICF2P1301675           | 27939042 | A | 0.25 | 0.2857 | C |
| 18 | BICF2P603201            | 27953105 | A | 0.25 | 0.2857 | C |
| 18 | BICF2P51398             | 27962254 | G | 0.25 | 0.2857 | A |
| 18 | BICF2P529407            | 27971084 | G | 0.75 | 0.7143 | A |

|    |                         |          |   |      |        |   |
|----|-------------------------|----------|---|------|--------|---|
| 18 | BICF2P776613            | 27982153 | G | 0.25 | 0.2857 | A |
| 18 | BICF2P187227            | 27996789 | A | 0.25 | 0.2857 | G |
| 18 | BICF2P1174571           | 28004237 | G | 0.75 | 0.7143 | A |
| 18 | BICF2P547337            | 28022789 | A | 0.75 | 0.7143 | G |
| 18 | BICF2P728083            | 28026938 | A | 0.75 | 0.7143 | C |
| 18 | BICF2P889797            | 28049554 | A | 0.25 | 0.2857 | G |
| 18 | BICF2P703026            | 28070302 | G | 0.25 | 0.2857 | A |
| 18 | G1022f1S307             | 28089713 | C | 0    | 0      | A |
| 18 | G1024f17S236            | 28192129 | A | 0    | 0      | G |
| 18 | BICF2P574860            | 28242980 | A | 0.5  | 0.5    | G |
| 18 | BICF2P931726            | 28324330 | G | 1    | 1      | A |
| 18 | TIGRP2P246440_rs8532180 | 28334275 | T | 0.5  | 0.5    | A |
| 18 | BICF2P1034358           | 28342655 | C | 1    | 1      | A |
| 18 | BICF2P1034359           | 28343339 | A | 0.5  | 0.5    | G |
| 18 | BICF2P156798            | 28351606 | A | 0.5  | 0.5    | G |
| 18 | BICF2P238951            | 28360978 | A | 0.5  | 0.5    | G |
| 18 | BICF2P1005851           | 28364336 | A | 0.5  | 0.5    | G |
| 18 | BICF2P1408461           | 28370862 | A | 0.5  | 0.5    | T |
| 18 | TIGRP2P246480_rs8950562 | 28388108 | 0 | 0    | 0      | G |
| 18 | BICF2S23448024          | 28406656 | G | 0.75 | 0.7143 | A |
| 18 | BICF2P946872            | 28424428 | G | 1    | 0.7143 | A |
| 18 | BICF2P91348             | 28428109 | G | 0.75 | 0.7143 | A |
| 18 | BICF2P1366718           | 28440228 | A | 0.75 | 0.7143 | G |
| 18 | TIGRP2P246530_rs8608469 | 28452508 | 0 | 0    | 0      | G |
| 18 | BICF2S23439408          | 28465056 | T | 0.75 | 0.7143 | A |
| 18 | BICF2P419514            | 28488253 | A | 0.5  | 0.5    | G |
| 18 | BICF2S23317158          | 28497151 | G | 0.25 | 0.3571 | C |
| 18 | BICF2P117709            | 28511519 | A | 0.25 | 0.3571 | G |
| 18 | BICF2P186688            | 28522153 | A | 0.25 | 0.3571 | G |
| 18 | BICF2P1296917           | 28541274 | G | 0.75 | 0.7143 | A |
| 18 | BICF2P476932            | 28550951 | A | 0.75 | 0.7143 | G |
| 18 | BICF2P894469            | 28575021 | A | 0.5  | 0.3571 | G |
| 18 | TIGRP2P246687_rs8504531 | 28583985 | A | 0    | 0      | G |
| 18 | BICF2P237068            | 28592873 | G | 0.5  | 0.3571 | A |
| 18 | BICF2P1235553           | 28605763 | 0 | 0    | 0      | G |
| 18 | BICF2P1358625           | 28633747 | G | 0.75 | 0.7143 | A |
| 18 | TIGRP2P246726_rs8836119 | 28645689 | A | 0    | 0      | G |
| 18 | BICF2P606203            | 28650417 | G | 0.75 | 0.7143 | A |
| 18 | BICF2P1439098           | 28660054 | A | 0.75 | 0.7143 | G |
| 18 | BICF2S234108            | 28676274 | A | 0.75 | 0.7143 | G |
| 18 | BICF2P113789            | 28683415 | G | 0.75 | 0.7143 | A |
| 18 | BICF2P1437597           | 28692649 | G | 0    | 0      | A |
| 18 | BICF2P933154            | 28706890 | G | 0.75 | 0.7143 | A |
| 18 | BICF2P1282634           | 28726222 | G | 0.75 | 0.7143 | A |
| 18 | BICF2S23617931          | 28730178 | A | 0.75 | 0.7143 | G |
| 18 | TIGRP2P246746_rs8676072 | 28739869 | A | 0.75 | 0.7143 | T |
| 18 | BICF2P14496             | 28753401 | A | 0    | 0      | G |



|    |                         |          |   |      |        |   |
|----|-------------------------|----------|---|------|--------|---|
| 18 | TIGRP2P246750_rs8494022 | 28802495 | G | 0.25 | 0.1429 | A |
| 18 | TIGRP2P246752_rs9045155 | 28808862 | A | 0.25 | 0.1429 | G |
| 18 | BICF2P491591            | 28809192 | A | 0.25 | 0.1429 | G |
| 18 | BICF2P1333179           | 28820727 | A | 0.25 | 0.1429 | G |
| 18 | BICF2P166367            | 28836593 | A | 0.25 | 0.1429 | G |
| 18 | TIGRP2P246809_rs8956242 | 28849956 | G | 0.75 | 0.7143 | A |
| 18 | BICF2P1410095           | 28856898 | A | 0.5  | 0.5    | G |
| 18 | BICF2S22950346          | 28868190 | A | 0.75 | 0.7143 | G |
| 18 | BICF2S237866            | 28879397 | G | 0    | 0      | A |
| 18 | BICF2P350531            | 28905317 | 0 | 0    | 0      | C |
| 18 | BICF2P145980            | 28919363 | 0 | 0    | 0      | C |
| 18 | BICF2S23731108          | 28954025 | G | 0    | 0      | A |
| 18 | BICF2P80019             | 28970267 | 0 | 0    | 0      | A |
| 18 | BICF2P379778            | 28987805 | 0 | 0    | 0      | G |
| 18 | TIGRP2P246835_rs8940707 | 28993582 | 0 | 0    | 0      | A |
| 18 | BICF2P335372            | 29008794 | A | 0.5  | 0.5    | G |
| 18 | BICF2P482213            | 29022208 | 0 | 0    | 0      | A |
| 18 | BICF2P1164853           | 29037113 | 0 | 0    | 0      | A |
| 18 | BICF2S23113233          | 29043212 | 0 | 0    | 0      | G |
| 18 | BICF2P1055775           | 29051049 | 0 | 0    | 0      | T |
| 18 | BICF2P782193            | 29070358 | 0 | 0    | 0      | C |
| 18 | BICF2S23731495          | 29075058 | A | 0    | 0      | G |
| 18 | BICF2S23735926          | 29078730 | A | 0    | 0      | G |
| 18 | BICF2P775187            | 29085350 | 0 | 0    | 0      | G |
| 18 | BICF2P32331             | 29103482 | 0 | 0    | 0      | A |
| 18 | BICF2P694235            | 29109887 | 0 | 0    | 0      | G |
| 18 | BICF2P1093892           | 29121056 | G | 0    | 0      | A |
| 18 | BICF2P496064            | 29133282 | 0 | 0    | 0      | A |
| 18 | BICF2P684829            | 29145675 | G | 0    | 0      | A |
| 18 | BICF2P439331            | 29159029 | A | 0    | 0      | G |
| 18 | BICF2S23532826          | 29164201 | A | 0    | 0      | C |
| 18 | BICF2P248556            | 29182802 | A | 0.75 | 0.7143 | G |
| 18 | BICF2P861301            | 29188858 | 0 | 0    | 0      | G |
| 18 | BICF2P545380            | 29199107 | G | 0.75 | 0.7143 | A |
| 18 | BICF2P813175            | 29211334 | A | 0.75 | 0.7143 | C |
| 18 | BICF2P1142840           | 29222746 | G | 0.25 | 0.2143 | A |
| 18 | BICF2P858117            | 29243114 | 0 | 0    | 0      | C |
| 18 | BICF2P762877            | 29252960 | 0 | 0    | 0      | A |
| 18 | BICF2P739163            | 29275530 | G | 0.25 | 0.2143 | A |
| 18 | BICF2P523373            | 29286935 | 0 | 0    | 0      | A |
| 18 | BICF2P487301            | 29295393 | A | 0    | 0      | T |
| 18 | BICF2P494488            | 29320584 | C | 0.75 | 0.7143 | A |
| 18 | BICF2P1394261           | 29322237 | A | 0.25 | 0.2143 | G |
| 18 | BICF2P1196617           | 29325285 | T | 0.75 | 0.7143 | A |
| 18 | BICF2P469414            | 29341591 | 0 | 0    | 0      | G |
| 18 | BICF2P87969             | 29366101 | 0 | 0    | 0      | A |
| 18 | BICF2P1393914           | 29380837 | G | 0    | 0      | A |

|    |                         |          |   |      |        |   |
|----|-------------------------|----------|---|------|--------|---|
| 18 | BICF2S2455244           | 29385279 | A | 0    | 0      | C |
| 18 | BICF2P548084            | 29404347 | 0 | 0    | 0      | A |
| 18 | BICF2P890212            | 29407692 | 0 | 0    | 0      | C |
| 18 | BICF2P904874            | 29420808 | 0 | 0    | 0      | G |
| 18 | BICF2S23645616          | 29431751 | A | 0.25 | 0.2143 | G |
| 18 | BICF2S22935123          | 29460329 | 0 | 0    | 0      | G |
| 18 | BICF2P1428301           | 29463684 | G | 0.5  | 0.5    | A |
| 18 | BICF2P321280            | 29484877 | 0 | 0    | 0      | G |
| 18 | BICF2S23435712          | 29499799 | 0 | 0    | 0      | A |
| 18 | BICF2P93585             | 29510992 | G | 0.75 | 0.7143 | A |
| 18 | BICF2P574114            | 29521429 | A | 0.75 | 0.7143 | G |
| 18 | BICF2P729791            | 29545919 | A | 0.25 | 0.2143 | G |
| 18 | BICF2P76264             | 29579024 | A | 0.25 | 0.2143 | G |
| 18 | BICF2P273407            | 29595141 | 0 | 0    | 0      | A |
| 18 | BICF2P1105670           | 29604610 | T | 0.25 | 0.2143 | A |
| 18 | BICF2S23226421          | 29623595 | A | 0.5  | 0.5    | G |
| 18 | BICF2P851939            | 29628707 | 0 | 0    | 0      | G |
| 18 | TIGRP2P246901_rs9054689 | 29636599 | 0 | 0    | 0      | C |
| 18 | BICF2S23024862          | 29649182 | A | 0    | 0      | G |
| 18 | BICF2P688405            | 29669246 | A | 0    | 0      | G |
| 18 | TIGRP2P246913_rs8860886 | 29672472 | A | 0.5  | 0.5    | G |
| 18 | BICF2P216660            | 29687826 | A | 0.5  | 0.5    | G |
| 18 | BICF2S23135741          | 29693055 | A | 0.5  | 0.5    | G |
| 18 | BICF2S23418916          | 29708550 | A | 0.5  | 0.5    | G |
| 18 | TIGRP2P246926_rs9243823 | 29721352 | C | 0.25 | 0.3571 | A |
| 18 | TIGRP2P246948_rs9103304 | 29731935 | G | 0.75 | 0.6429 | A |
| 18 | BICF2P146268            | 29745993 | G | 0    | 0      | A |
| 18 | BICF2P709242            | 29748452 | A | 1    | 1      | G |
| 18 | BICF2S23044615          | 29773179 | A | 1    | 1      | G |
| 18 | BICF2P509005            | 29777111 | A | 1    | 1      | C |
| 18 | TIGRP2P246959_rs9186351 | 29790614 | A | 1    | 1      | G |
| 18 | BICF2P906137            | 29807943 | 0 | 0    | 0      | G |
| 18 | TIGRP2P246969_rs8719895 | 29813664 | G | 0    | 0      | A |
| 18 | BICF2P486322            | 29822586 | C | 0    | 0      | A |
| 18 | BICF2P1028588           | 29841627 | A | 0    | 0      | C |
| 18 | BICF2P234170            | 29843151 | G | 0    | 0      | A |
| 18 | TIGRP2P246996_rs8857394 | 29854873 | A | 0    | 0      | G |
| 18 | BICF2P1317945           | 29871074 | G | 0.5  | 0.5    | A |
| 18 | BICF2P930975            | 29882229 | G | 0.25 | 0.3571 | A |
| 18 | BICF2P1210830           | 29895239 | A | 0.25 | 0.1429 | G |
| 18 | TIGRP2P247009_rs8825650 | 29900163 | A | 0.5  | 0.5    | G |
| 18 | BICF2P1425983           | 29912592 | 0 | 0    | 0      | C |
| 18 | BICF2S23526529          | 29929616 | 0 | 0    | 0      | A |
| 18 | BICF2P4479              | 29945777 | A | 0.25 | 0.3571 | G |
| 18 | BICF2P595934            | 29948008 | 0 | 0    | 0      | C |
| 18 | TIGRP2P247030_rs9238525 | 29967586 | 0 | 0    | 0      | A |
| 18 | BICF2P39571             | 29977135 | A | 0.5  | 0.5    | G |

|    |                         |          |   |      |        |   |
|----|-------------------------|----------|---|------|--------|---|
| 18 | BICF2P1057371           | 29991608 | A | 0.25 | 0.3571 | G |
| 18 | TIGRP2P247032_rs8712245 | 29993249 | 0 | 0    | 0      | G |
| 18 | TIGRP2P247044_rs8804611 | 30014080 | A | 0.5  | 0.5    | C |
| 18 | TIGRP2P247047_rs8506649 | 30016443 | A | 1    | 1      | G |
| 18 | BICF2S2394356           | 30028016 | G | 0.75 | 0.6429 | A |
| 18 | BICF2P1354734           | 30038373 | A | 0.25 | 0.3571 | G |
| 18 | BICF2P909653            | 30054058 | A | 0.5  | 0.5    | C |
| 18 | BICF2S23445890          | 30061202 | G | 0    | 0      | A |
| 18 | BICF2P962763            | 30080732 | A | 0    | 0      | G |
| 18 | BICF2P452723            | 30093359 | A | 0    | 0      | G |
| 18 | BICF2P90652             | 30104258 | G | 0    | 0      | A |
| 18 | BICF2P1085031           | 30110259 | 0 | 0    | 0      | A |
| 18 | TIGRP2P247091_rs8758991 | 30121645 | G | 0.5  | 0.5    | A |
| 18 | BICF2P1226779           | 30137431 | 0 | 0    | 0      | A |
| 18 | BICF2S23434382          | 30150976 | A | 0    | 0      | G |
| 18 | TIGRP2P247116_rs8650996 | 30157853 | A | 0.25 | 0.1429 | G |
| 18 | BICF2P1139340           | 30168714 | G | 0.5  | 0.5    | A |
| 18 | BICF2P1068568           | 30176036 | G | 0.5  | 0.5    | A |
| 18 | BICF2P1399255           | 30197130 | 0 | 0    | 0      | A |
| 18 | BICF2P225173            | 30205195 | C | 0.25 | 0.1429 | A |
| 18 | BICF2P643499            | 30241514 | A | 0.5  | 0.5    | G |
| 18 | TIGRP2P247149_rs9147839 | 30247517 | A | 0.5  | 0.5    | G |
| 18 | BICF2P624076            | 30258967 | C | 0.25 | 0.3571 | A |
| 18 | BICF2P1088663           | 30269050 | A | 0.75 | 0.6429 | C |
| 18 | BICF2S2333896           | 30270617 | A | 0.75 | 0.6429 | G |
| 18 | BICF2P661620            | 30287107 | G | 0    | 0      | A |
| 18 | BICF2P1001093           | 30292811 | C | 0    | 0      | A |
| 18 | BICF2P1320005           | 30318031 | G | 0    | 0      | A |
| 18 | BICF2P977602            | 30329392 | 0 | 0    | 0      | G |
| 18 | TIGRP2P247181_rs9101193 | 30347953 | C | 0    | 0      | A |
| 18 | BICF2P1172952           | 30350444 | G | 0.5  | 0.5    | A |
| 18 | BICF2S23634600          | 30363252 | A | 0.25 | 0.1429 | G |
| 18 | BICF2P1379000           | 30381149 | A | 0.5  | 0.5    | G |
| 18 | BICF2P1514016           | 30385828 | A | 0.5  | 0.5    | G |
| 18 | BICF2S23341596          | 30402796 | A | 0.75 | 0.8571 | G |
| 18 | BICF2S23545199          | 30417457 | G | 0    | 0      | A |
| 18 | TIGRP2P247210_rs8717531 | 30427651 | G | 0    | 0      | A |
| 18 | BICF2P394231            | 30429416 | G | 0.25 | 0.1429 | A |
| 18 | TIGRP2P247220_rs9061494 | 30441864 | A | 0    | 0      | C |
| 18 | BICF2P163715            | 30458920 | C | 0.5  | 0.5    | A |
| 18 | BICF2P1294812           | 30468965 | C | 0.5  | 0.5    | A |
| 18 | BICF2S23763807          | 30482712 | C | 0    | 0      | A |
| 18 | BICF2P1392276           | 30489701 | G | 0.25 | 0.3571 | A |
| 18 | BICF2P993989            | 30504337 | A | 0    | 0      | G |
| 18 | BICF2P469245            | 30515047 | A | 0    | 0      | G |
| 18 | BICF2S23411890          | 30523234 | A | 0.5  | 0.5    | G |
| 18 | BICF2P649011            | 30539746 | C | 0.5  | 0.5    | G |

|    |                         |          |   |      |         |   |
|----|-------------------------|----------|---|------|---------|---|
| 18 | BICF2P236545            | 30564312 | G | 0    | 0       | A |
| 18 | BICF2P1152399           | 30569898 | G | 0    | 0       | A |
| 18 | BICF2P1386405           | 30583984 | G | 0.5  | 0.25    | A |
| 18 | BICF2S22942975          | 30584474 | A | 0.5  | 0.2857  | G |
| 18 | BICF2S23512769          | 30597892 | A | 0.25 | 0.1429  | G |
| 18 | BICF2P979307            | 30624075 | G | 0    | 0       | A |
| 18 | TIGRP2P247286_rs9006990 | 30625627 | G | 0.5  | 0.5     | A |
| 18 | BICF2P640043            | 30637620 | 0 | 0    | 0       | G |
| 18 | TIGRP2P247299_rs9090020 | 30655361 | A | 0.75 | 0.6429  | G |
| 18 | TIGRP2P247303_rs8934970 | 30663434 | C | 0.75 | 0.6429  | A |
| 18 | BICF2S23725565          | 30676302 | A | 0.5  | 0.5     | C |
| 18 | BICF2P641481            | 30682361 | 0 | 0    | 0       | A |
| 18 | BICF2P503387            | 30696035 | A | 0.25 | 0.3571  | G |
| 18 | BICF2P1192479           | 30706113 | A | 0.25 | 0.08333 | G |
| 18 | BICF2P192766            | 30736275 | 0 | 0    | 0       | A |
| 18 | BICF2P313138            | 30763036 | A | 0.25 | 0.1429  | G |
| 18 | TIGRP2P247309_rs8903982 | 30781441 | A | 0    | 0       | G |
| 18 | TIGRP2P247315_rs8528511 | 30786420 | A | 0    | 0       | G |
| 18 | TIGRP2P247329_rs9251479 | 30804133 | C | 0    | 0       | A |
| 18 | BICF2P1451370           | 30827779 | 0 | 0    | 0       | G |
| 18 | BICF2P111411            | 30837646 | 0 | 0    | 0       | G |
| 18 | BICF2P1381410           | 30846758 | A | 0.25 | 0.1429  | G |
| 18 | BICF2P819207            | 30847037 | A | 0.25 | 0.1429  | G |
| 18 | BICF2P295333            | 30855643 | A | 0    | 0       | G |
| 18 | BICF2P342055            | 30868456 | G | 0    | 0       | A |
| 18 | BICF2P222793            | 30877789 | G | 0.25 | 0.1429  | C |
| 18 | BICF2P903734            | 30891646 | A | 0.75 | 0.6429  | T |
| 18 | TIGRP2P247333_rs9196541 | 30920687 | A | 0    | 0       | G |
| 18 | BICF2P480004            | 30927885 | G | 0    | 0       | A |
| 18 | BICF2P1071613           | 30937130 | G | 0.5  | 0.2857  | A |
| 18 | BICF2P1183510           | 30939156 | C | 0.5  | 0.2857  | A |
| 18 | BICF2P388124            | 30951877 | A | 0.25 | 0.1429  | T |
| 18 | BICF2S23763747          | 30968523 | G | 0.25 | 0.1429  | A |
| 18 | BICF2P1296589           | 30978982 | G | 0.5  | 0.5     | A |
| 18 | BICF2P655444            | 30981768 | C | 0.5  | 0.5     | A |
| 18 | TIGRP2P247360_rs9161848 | 30994813 | A | 0.5  | 0.5     | G |
| 18 | BICF2S23646410          | 31004055 | A | 0.25 | 0.3571  | C |
| 18 | BICF2P1099307           | 31020833 | A | 0.5  | 0.2857  | C |
| 18 | BICF2S23248195          | 31031772 | T | 0    | 0       | A |
| 18 | BICF2P737692            | 31042555 | C | 0    | 0       | A |
| 18 | TIGRP2P247394_rs8883597 | 31050557 | A | 0    | 0       | G |
| 18 | BICF2P737894            | 31069151 | G | 0    | 0       | A |
| 18 | BICF2P38067             | 31078648 | A | 0    | 0       | G |
| 18 | TIGRP2P247448_rs8712951 | 31093274 | A | 0    | 0       | G |
| 18 | TIGRP2P247454_rs9239776 | 31101783 | C | 0.25 | 0.3571  | A |
| 18 | BICF2P1102379           | 31115381 | A | 0    | 0       | G |
| 18 | BICF2P978138            | 31121847 | A | 0    | 0       | G |

|    |                         |          |   |      |        |   |
|----|-------------------------|----------|---|------|--------|---|
| 18 | BICF2P182758            | 31139564 | 0 | 0    | 0      | G |
| 18 | BICF2P1376612           | 31146751 | G | 0.25 | 0.1429 | A |
| 18 | BICF2P796603            | 31157515 | G | 0.5  | 0.7143 | A |
| 18 | BICF2P687406            | 31167292 | A | 0    | 0      | G |
| 18 | BICF2P326668            | 31179309 | A | 0    | 0      | G |
| 18 | TIGRP2P247486_rs8504341 | 31193774 | A | 0    | 0      | G |
| 18 | BICF2P190963            | 31202850 | A | 0    | 0      | C |
| 18 | TIGRP2P247492_rs9073392 | 31218374 | A | 0    | 0      | G |
| 18 | BICF2P1230367           | 31227732 | G | 0.25 | 0.1429 | A |
| 18 | BICF2P912420            | 31244733 | G | 0.5  | 0.5    | A |
| 18 | BICF2P715109            | 31248767 | A | 0.5  | 0.5    | G |
| 18 | BICF2P508740            | 31259051 | C | 0.5  | 0.5    | G |
| 18 | BICF2S2318030           | 31273089 | C | NA   | 0.5    | A |
| 18 | BICF2P720313            | 31280656 | A | 0.5  | 0.5    | G |
| 18 | BICF2S23321673          | 31292026 | 0 | 0    | 0      | G |
| 18 | BICF2S23111092          | 31314217 | A | 0.5  | 0.5    | G |
| 18 | BICF2P171786            | 31317491 | 0 | 0    | 0      | A |
| 18 | BICF2P1221672           | 31330590 | 0 | 0    | 0      | G |
| 18 | BICF2P371791            | 31359568 | 0 | 0    | 0      | A |
| 18 | BICF2P1064758           | 31380714 | 0 | 0    | 0      | G |
| 18 | BICF2S23327662          | 31388760 | A | 0    | 0      | C |
| 18 | BICF2S2359705           | 31422152 | A | 0    | 0      | G |
| 18 | BICF2P1261032           | 31437726 | A | 0.25 | 0.3571 | G |
| 18 | TIGRP2P247511_rs8544280 | 31448433 | 0 | 0    | 0      | A |
| 18 | BICF2P432543            | 31458959 | G | 0.25 | 0.3571 | A |
| 18 | BICF2P377670            | 31466894 | A | 0    | 0      | G |
| 18 | BICF2P377668            | 31467275 | A | 0    | 0      | C |
| 18 | BICF2P435180            | 31486736 | A | 0    | 0      | G |
| 18 | BICF2P797983            | 31493929 | A | 0    | 0      | T |
| 18 | BICF2S22948596          | 31503526 | A | 0.25 | 0.3571 | G |
| 18 | BICF2S22954599          | 31529291 | A | 0.25 | 0.3571 | G |
| 18 | BICF2S22951505          | 31533285 | A | 0.25 | 0.3571 | G |
| 18 | BICF2P461664            | 31566982 | 0 | 0    | 0      | A |
| 18 | BICF2S22929242          | 31575347 | G | 0    | 0      | A |
| 18 | BICF2S22930123          | 31579289 | G | 0    | 0      | A |
| 18 | BICF2P693599            | 31582014 | A | 0    | 0      | G |
| 18 | BICF2S23022243          | 31612457 | G | 0.25 | 0.1429 | C |
| 18 | BICF2S2328153           | 31616638 | G | 0.5  | 0.5    | A |
| 18 | TIGRP2P247524_rs8816334 | 31634531 | G | 0.5  | 0.5    | A |
| 18 | BICF2S22937464          | 31639545 | A | 0.5  | 0.5    | G |
| 18 | TIGRP2P247540_rs9128313 | 31659105 | G | 0.5  | 0.5    | A |
| 18 | BICF2P304978            | 31659162 | G | 0.5  | 0.5    | A |
| 18 | BICF2P781459            | 31665308 | A | 0    | 0      | G |
| 18 | BICF2P475591            | 31678503 | A | 0    | 0      | G |
| 18 | BICF2P960533            | 31682687 | A | 0.75 | 0.8571 | G |
| 18 | TIGRP2P247574_rs8728926 | 31700038 | G | 1    | 1      | A |
| 18 | TIGRP2P247580_rs8665418 | 31708834 | G | 0    | 0      | A |

|    |                         |          |   |      |        |   |
|----|-------------------------|----------|---|------|--------|---|
| 18 | TIGRP2P247585_rs9004022 | 31726115 | A | 0    | 0      | G |
| 18 | BICF2P1343379           | 31729753 | A | 0.75 | 0.8571 | G |
| 18 | BICF2P289765            | 31743066 | A | 0    | 0      | G |
| 18 | BICF2S23156031          | 31755092 | A | 0.25 | 0.1429 | G |
| 18 | BICF2P301252            | 31766593 | C | 0    | 0      | G |
| 18 | TIGRP2P247615_rs9024929 | 31777798 | G | 0.25 | 0.1429 | A |
| 18 | BICF2P536226            | 31778700 | G | 0.25 | 0.1429 | A |
| 18 | BICF2S2375604           | 31787672 | 0 | 0    | 0      | G |
| 18 | BICF2P807392            | 31799176 | 0 | 0    | 0      | A |
| 18 | TIGRP2P247630_rs8966169 | 31812672 | C | 0    | 0      | A |
| 18 | BICF2P216996            | 31829303 | A | 0    | 0      | C |
| 18 | BICF2P1271640           | 31835045 | A | 0.25 | 0.3571 | G |
| 18 | BICF2P226157            | 31847993 | C | 0.25 | 0.3571 | A |
| 18 | BICF2P1093443           | 31870198 | A | 0.5  | 0.5    | G |
| 18 | BICF2S2442059           | 31872758 | G | 0.75 | 0.6429 | A |
| 18 | BICF2P881528            | 31880280 | 0 | 0    | 0      | G |
| 18 | TIGRP2P247680_rs9197995 | 31894034 | A | 0.5  | 0.5    | G |
| 18 | BICF2S23113566          | 31903934 | A | 0    | 0      | G |
| 18 | BICF2P448083            | 31913081 | A | 0.75 | 0.6429 | G |
| 18 | TIGRP2P247694_rs8538986 | 31924650 | G | 0.5  | 0.5    | A |
| 18 | BICF2S23014525          | 31940560 | C | 1    | 1      | A |
| 18 | TIGRP2P247707_rs9103002 | 31949368 | 0 | 0    | 0      | G |
| 18 | BICF2P1318072           | 31967567 | G | 0.25 | 0.3571 | A |
| 18 | BICF2P1359322           | 31979143 | G | 0    | 0      | A |
| 18 | BICF2P1359320           | 31979429 | A | 0    | 0      | G |
| 18 | BICF2P87897             | 31990875 | 0 | 0    | 0      | G |
| 18 | BICF2P634943            | 31995698 | G | 0.5  | 0.5    | A |
| 18 | TIGRP2P247739_rs8843460 | 32008280 | G | 0.75 | 0.6429 | A |
| 18 | BICF2P773631            | 32016345 | 0 | 0    | 0      | A |
| 18 | BICF2S23714353          | 32033735 | A | 0    | 0      | C |
| 18 | TIGRP2P247752_rs9041333 | 32041651 | 0 | 0    | 0      | G |
| 18 | BICF2P198893            | 32061232 | G | 0    | 0      | A |
| 18 | BICF2P960191            | 32081010 | A | 0    | 0      | G |
| 18 | BICF2S23327481          | 32081370 | G | 0    | 0      | A |
| 18 | BICF2S230638            | 32087886 | A | 0    | 0      | G |
| 18 | BICF2S23610202          | 32096982 | G | 0.5  | 0.5    | A |
| 18 | TIGRP2P247784_rs8470313 | 32110335 | A | 0    | 0.1429 | G |
| 18 | TIGRP2P247788_rs8906879 | 32130757 | C | 0    | 0      | A |
| 18 | BICF2P778506            | 32131688 | A | 0.25 | 0.1429 | G |
| 18 | BICF2S2448465           | 32150884 | G | 0.25 | 0.1429 | A |
| 18 | BICF2P554781            | 32170339 | 0 | 0    | 0      | A |
| 18 | BICF2P1272283           | 32186992 | 0 | 0    | 0      | G |
| 18 | BICF2S24412848          | 32194396 | 0 | 0    | 0      | C |
| 18 | BICF2P625739            | 32205923 | 0 | 0    | 0      | G |
| 18 | BICF2P1082454           | 32221994 | 0 | 0    | 0      | C |
| 18 | TIGRP2P247793_rs8742886 | 32223050 | 0 | 0    | 0      | A |
| 18 | BICF2S23056955          | 32236267 | G | 0.5  | 0.5    | A |

|    |                         |          |   |      |        |   |
|----|-------------------------|----------|---|------|--------|---|
| 18 | TIGRP2P247802_rs8638182 | 32258436 | 0 | 0    | 0      | A |
| 18 | BICF2P937161            | 32289454 | 0 | 0    | 0      | A |
| 18 | BICF2P554972            | 32297163 | 0 | 0    | 0      | C |
| 18 | BICF2P657887            | 32305300 | 0 | 0    | 0      | G |
| 18 | TIGRP2P247817_rs8657997 | 32335423 | 0 | 0    | 0      | A |
| 18 | BICF2P857589            | 32365446 | 0 | 0    | 0      | G |
| 18 | BICF2P1035052           | 32379936 | 0 | 0    | 0      | A |
| 18 | BICF2P1061154           | 32396856 | A | 0    | 0      | G |
| 18 | BICF2P1109347           | 32417764 | 0 | 0    | 0      | A |
| 18 | TIGRP2P247822_rs8934659 | 32428984 | 0 | 0    | 0      | A |
| 18 | BICF2P935015            | 32433699 | 0 | 0    | 0      | C |
| 18 | BICF2S23748306          | 32443911 | A | 0    | 0      | G |
| 18 | BICF2S23628662          | 32457894 | A | 0    | 0      | G |
| 18 | BICF2S22964183          | 32471797 | C | 0    | 0      | A |
| 18 | BICF2S23538402          | 32477457 | A | 0    | 0      | C |
| 18 | BICF2P1147798           | 32492154 | A | 0    | 0      | G |
| 18 | BICF2P722228            | 32505283 | G | 0    | 0      | A |
| 18 | BICF2S23416025          | 32521642 | 0 | 0    | 0      | G |
| 18 | BICF2P1300929           | 32522877 | 0 | 0    | 0      | G |
| 18 | BICF2P1232047           | 32538947 | G | 0    | 0      | A |
| 18 | BICF2P180220            | 32551661 | 0 | 0    | 0      | G |
| 18 | BICF2P1259226           | 32561611 | A | 1    | 0.6667 | G |
| 18 | BICF2P733402            | 32572522 | A | 0    | 0      | C |
| 18 | BICF2P792352            | 32586816 | A | 0.75 | 0.6429 | G |
| 18 | BICF2P1059974           | 32593896 | 0 | 0    | 0      | C |
| 18 | BICF2P1255931           | 32608409 | 0 | 0    | 0      | A |
| 18 | BICF2P229260            | 32615344 | A | 0.75 | 0.6429 | G |
| 18 | BICF2P665064            | 32630645 | G | 0    | 0      | A |
| 18 | TIGRP2P247882_rs8863729 | 32639965 | G | 0    | 0      | A |
| 18 | BICF2P610902            | 32689905 | 0 | 0    | 0      | A |
| 18 | BICF2P1106584           | 32698421 | G | 0    | 0      | A |
| 18 | BICF2S24411559          | 32707389 | G | 0    | 0      | A |
| 18 | BICF2P893769            | 32718274 | G | 0    | 0      | A |
| 18 | TIGRP2P247891_rs8705452 | 32747505 | C | 0    | 0      | G |
| 18 | BICF2P1096148           | 32772368 | A | 0    | 0      | G |
| 18 | BICF2P747629            | 32778412 | 0 | 0    | 0      | A |
| 18 | BICF2P839995            | 32813190 | 0 | 0    | 0      | A |
| 18 | BICF2P935458            | 32826439 | A | 0    | 0      | G |
| 18 | BICF2P1309258           | 32862791 | G | 0.5  | 0.5    | A |
| 18 | BICF2S23416365          | 32872434 | A | 0.25 | 0.3571 | G |
| 18 | BICF2P516346            | 32883679 | A | 0.25 | 0.3571 | G |
| 18 | BICF2P844768            | 32893638 | A | 0    | 0      | T |
| 18 | BICF2S23017215          | 32906405 | A | 0.5  | 0.5    | G |
| 18 | BICF2S23735520          | 32913092 | A | 0    | 0      | G |
| 18 | BICF2P177695            | 32933971 | A | 0    | 0      | C |
| 18 | BICF2P146256            | 32947154 | G | 0.25 | 0.3571 | A |
| 18 | BICF2S2351382           | 32963224 | A | 0.25 | 0.3571 | G |

|    |                         |          |   |      |        |   |
|----|-------------------------|----------|---|------|--------|---|
| 18 | TIGRP2P247918_rs8720303 | 32977026 | A | 0.25 | 0.3571 | C |
| 18 | TIGRP2P247920_rs8757526 | 32992399 | A | 0.25 | 0.3571 | G |
| 18 | TIGRP2P247922_rs8893922 | 32995106 | A | 0    | 0      | G |
| 18 | BICF2P481140            | 33006534 | G | 0    | 0      | A |
| 18 | BICF2P179827            | 33021625 | G | 0.25 | 0.3571 | A |
| 18 | BICF2P475373            | 33042048 | A | 0    | 0      | G |
| 18 | BICF2P1205778           | 33059254 | G | 0.5  | 0.5    | A |
| 18 | BICF2P1290044           | 33065256 | G | 0    | 0      | A |
| 18 | TIGRP2P247964_rs8849205 | 33076272 | A | 0    | 0      | G |
| 18 | TIGRP2P247970_rs8898836 | 33089676 | G | 0    | 0      | A |
| 18 | BICF2P767551            | 33099061 | A | 0.25 | 0.3571 | G |
| 18 | BICF2P378300            | 33111023 | G | 0.5  | 0.7143 | A |
| 18 | BICF2P488643            | 33120648 | A | 0.5  | 0.7143 | G |
| 18 | BICF2P488640            | 33121161 | G | 0.5  | 0.7143 | A |
| 18 | BICF2P302210            | 33127128 | A | 0.25 | 0.3571 | T |
| 18 | BICF2P1053605           | 33134423 | A | 0.5  | 0.7143 | G |
| 18 | BICF2P1053603           | 33135590 | C | 0.25 | 0.3571 | A |
| 18 | BICF2P1057192           | 33152977 | A | 0.25 | 0.3571 | G |
| 18 | BICF2P827525            | 33163911 | A | 0.25 | 0.3333 | G |
| 18 | BICF2P465578            | 33176573 | G | 0.5  | 0.7143 | A |
| 18 | BICF2S23435178          | 33181457 | G | 0.25 | 0.3571 | A |
| 18 | BICF2P332336            | 33189957 | G | 0.25 | 0.3571 | A |
| 18 | TIGRP2P248005_rs9193908 | 33207784 | A | 0.25 | 0.3571 | T |
| 18 | BICF2P290924            | 33213165 | A | 0.25 | 0.3571 | G |
| 18 | BICF2P1288679           | 33230944 | G | 0.5  | 0.7143 | A |
| 18 | BICF2G630700564         | 33240355 | A | 0.25 | 0.1429 | G |
| 18 | BICF2G630700545         | 33248671 | C | 0.5  | 0.5    | A |
| 18 | BICF2S2328183           | 33259392 | A | 0    | 0      | G |
| 18 | TIGRP2P248029_rs8739272 | 33283984 | A | 0    | 0      | C |
| 18 | BICF2P174739            | 33309748 | G | 0    | 0      | A |
| 18 | TIGRP2P248043_rs9083744 | 33317619 | A | 0    | 0      | C |
| 18 | TIGRP2P248050_rs9059642 | 33329492 | A | 0    | 0      | G |
| 18 | BICF2P321078            | 33348391 | G | 0    | 0      | A |
| 18 | BICF2P1209562           | 33360553 | G | 0.5  | 0.7143 | A |
| 18 | BICF2P835413            | 33367860 | A | 0.5  | 0.7143 | C |
| 18 | BICF2P68591             | 33377610 | T | 0.5  | 0.7143 | A |
| 18 | TIGRP2P248090_rs8874533 | 33391392 | A | 0    | 0      | C |
| 18 | BICF2P1244531           | 33404847 | C | 0    | 0      | A |
| 18 | BICF2P892928            | 33408949 | G | 0    | 0      | A |
| 18 | BICF2S23354061          | 33424234 | G | 0.5  | 0.2857 | A |
| 18 | TIGRP2P248119_rs8970027 | 33431982 | G | 0.25 | 0.3571 | A |
| 18 | BICF2S23339261          | 33451718 | A | 0.5  | 0.2857 | C |
| 18 | BICF2P182643            | 33461747 | 0 | 0    | 0      | A |
| 18 | BICF2P382255            | 33487448 | 0 | 0    | 0      | G |
| 18 | BICF2P645812            | 33494088 | A | 0.25 | 0.3571 | G |
| 18 | BICF2P1257730           | 33502193 | G | 0    | 0      | A |
| 18 | TIGRP2P248133_rs8765257 | 33515744 | G | 1    | 1      | A |



|    |                         |          |   |      |        |   |
|----|-------------------------|----------|---|------|--------|---|
| 18 | BICF2P602596            | 33529397 | G | 0    | 0      | A |
| 18 | BICF2P677426            | 33540260 | A | 1    | 1      | G |
| 18 | BICF2S23114099          | 33546429 | A | 0    | 0      | G |
| 18 | BICF2S23018563          | 33567523 | A | 1    | 1      | G |
| 18 | BICF2P1426805           | 33569839 | C | 1    | 1      | A |
| 18 | BICF2P412064            | 33584627 | A | 1    | 1      | C |
| 18 | TIGRP2P248149_rs8859841 | 33599834 | A | 1    | 1      | T |
| 18 | BICF2S23159338          | 33610966 | G | 1    | 1      | A |
| 18 | BICF2P1102262           | 33618543 | A | 1    | 1      | G |
| 18 | TIGRP2P248173_rs9073826 | 33627168 | A | 0    | 0      | G |
| 18 | BICF2S23740836          | 33657294 | A | 0.25 | 0.3571 | G |
| 18 | BICF2S2296488           | 33670161 | A | 1    | 1      | T |
| 18 | BICF2S23521724          | 33672275 | G | 1    | 1      | A |
| 18 | BICF2P94315             | 33684131 | A | 0.75 | 0.6429 | G |
| 18 | TIGRP2P248175_rs9019008 | 33693313 | 0 | 0    | 0      | G |
| 18 | BICF2P656997            | 33699843 | A | 0.5  | 0.2857 | G |
| 18 | BICF2P290140            | 33704159 | G | 1    | 1      | C |
| 18 | BICF2S23348942          | 33716529 | G | 0.5  | 0.2857 | A |
| 18 | BICF2P836914            | 33720986 | A | 0.5  | 0.2857 | G |
| 18 | BICF2P449706            | 33733096 | G | 0.5  | 0.2857 | A |
| 18 | BICF2S23661357          | 33750518 | G | 0.25 | 0.3571 | A |
| 18 | BICF2S23317013          | 33766530 | G | 0.75 | 0.6429 | A |
| 18 | BICF2P988773            | 33776979 | A | 0    | 0      | G |
| 18 | BICF2P1194389           | 33795276 | A | 0    | 0      | G |
| 18 | BICF2P165998            | 33798521 | A | 1    | 1      | G |
| 18 | BICF2P112307            | 33812733 | G | 0    | 0      | A |
| 18 | TIGRP2P248231_rs8503176 | 33823130 | G | 0    | 0      | A |
| 18 | BICF2P697478            | 33836754 | A | 0    | 0      | G |
| 18 | BICF2P1116188           | 33860935 | A | 0    | 0      | G |
| 18 | BICF2P559941            | 33876987 | G | 0.75 | 0.6429 | A |
| 18 | BICF2P871285            | 33885646 | G | 0    | 0      | A |
| 18 | TIGRP2P248245_rs9176212 | 33891122 | G | 0    | 0      | A |
| 18 | BICF2P1210126           | 33911930 | A | 0.5  | 0.2857 | G |
| 18 | TIGRP2P248268_rs9009532 | 33918078 | A | 0.75 | 0.6429 | G |
| 18 | BICF2P543931            | 33929145 | A | 0    | 0      | G |
| 18 | BICF2P1238573           | 33944272 | A | 0    | 0      | G |
| 18 | BICF2P664743            | 33952932 | A | 0.25 | 0.3571 | G |
| 18 | TIGRP2P248284_rs9008860 | 33959589 | G | 0.75 | 0.6429 | A |
| 18 | BICF2P944113            | 33973377 | A | 0    | 0      | C |
| 18 | BICF2P431533            | 33996803 | C | 0.5  | 0.2857 | A |
| 18 | BICF2P1369510           | 34010237 | G | 0.25 | 0.3571 | A |
| 18 | TIGRP2P248322_rs8874236 | 34021197 | G | 0    | 0      | A |
| 18 | BICF2P283019            | 34035709 | A | 0    | 0      | C |
| 18 | TIGRP2P248338_rs8926869 | 34052021 | G | 0.75 | 0.6429 | A |
| 18 | BICF2P1275469           | 34067949 | G | 0    | 0      | A |
| 18 | TIGRP2P248358_rs8680739 | 34085789 | A | 0    | 0      | G |
| 18 | TIGRP2P248359_rs8755910 | 34093986 | A | 0.25 | 0.3571 | G |

|    |                         |          |   |      |        |   |
|----|-------------------------|----------|---|------|--------|---|
| 18 | BICF2S23356875          | 34098053 | A | 0.25 | 0.3571 | G |
| 18 | BICF2P673223            | 34118941 | T | 0.25 | 0.3571 | A |
| 18 | BICF2P813459            | 34131323 | A | 0    | 0      | G |
| 18 | BICF2S23044504          | 34133766 | G | 0.5  | 0.7143 | A |
| 18 | BICF2S23745782          | 34152568 | A | 0.75 | 0.6429 | G |
| 18 | BICF2P866566            | 34159244 | A | 0.25 | 0.3571 | T |
| 18 | BICF2P1319313           | 34167611 | A | 0.75 | 0.6429 | G |
| 18 | BICF2S23355688          | 34183810 | A | 0.25 | 0.3571 | C |
| 18 | TIGRP2P248408_rs9234670 | 34198843 | G | 0    | 0      | A |
| 18 | BICF2P71153             | 34202123 | 0 | 0    | 0      | G |
| 18 | BICF2P993827            | 34221079 | C | 0    | 0      | G |
| 18 | BICF2S23744353          | 34234393 | 0 | 0    | 0      | C |
| 18 | BICF2P750244            | 34238654 | 0 | 0    | 0      | A |
| 18 | BICF2S23053134          | 34242644 | G | 0    | 0      | A |
| 18 | BICF2S23312507          | 34249230 | G | 0    | 0      | C |
| 18 | TIGRP2P248414_rs8886501 | 34261128 | C | 0.25 | 0.3571 | G |
| 18 | TIGRP2P248416_rs8960406 | 34270435 | C | 1    | 1      | A |
| 18 | BICF2P348747            | 34290102 | A | 0    | 0      | G |
| 18 | BICF2S23053066          | 34299999 | G | 1    | 1      | A |
| 18 | BICF2S23612346          | 34308950 | A | 0    | 0      | C |
| 18 | BICF2S23357247          | 34320207 | G | 0    | 0      | A |
| 18 | BICF2S23546595          | 34332648 | A | 0    | 0      | G |
| 18 | BICF2P665780            | 34339413 | A | 0    | 0      | G |
| 18 | BICF2P1168122           | 34346542 | G | 0.25 | 0.1429 | A |
| 18 | TIGRP2P248438_rs8990618 | 34356198 | G | 0    | 0      | C |
| 18 | BICF2P663864            | 34363271 | G | 0.25 | 0.1429 | A |
| 18 | BICF2S23628660          | 34384932 | G | 0.75 | 0.8571 | A |
| 18 | BICF2P1364861           | 34396227 | A | 0.25 | 0.1429 | G |
| 18 | BICF2S23317522          | 34406938 | C | 0.25 | 0.3571 | A |
| 18 | BICF2P749521            | 34418364 | G | 0.25 | 0.3571 | A |
| 18 | TIGRP2P248486_rs8660987 | 34429233 | 0 | 0    | 0      | A |
| 18 | TIGRP2P248487_rs9168006 | 34432507 | C | 0    | 0      | A |
| 18 | TIGRP2P248489_rs9123744 | 34447835 | A | 0    | 0      | G |
| 18 | TIGRP2P248490_rs8589659 | 34459694 | 0 | 0    | 0      | A |
| 18 | BICF2P706386            | 34471689 | 0 | 0    | 0      | G |
| 18 | BICF2P658073            | 34483736 | G | 0.5  | 0.5    | A |
| 18 | BICF2P1158739           | 34492785 | A | 0.75 | 0.8571 | G |
| 18 | BICF2P1232583           | 34502157 | A | 0    | 0      | G |
| 18 | BICF2P1170934           | 34522320 | A | 0    | 0      | C |
| 18 | BICF2P401778            | 34523829 | A | 0    | 0      | G |
| 18 | BICF2S23039358          | 34544969 | G | 0.25 | 0.3571 | A |
| 18 | BICF2P145876            | 34551643 | G | 0    | 0      | A |
| 18 | BICF2P814871            | 34563332 | G | 0.5  | 0.5    | A |
| 18 | BICF2P604964            | 34571436 | C | 0.5  | 0.5    | A |
| 18 | BICF2P931757            | 34586184 | G | 0.25 | 0.3571 | A |
| 18 | BICF2P184963            | 34599333 | G | 0.75 | 0.6429 | A |
| 18 | BICF2P744884            | 34604929 | 0 | 0    | 0      | G |

|    |                         |          |   |      |        |   |
|----|-------------------------|----------|---|------|--------|---|
| 18 | BICF2P1194758           | 34610832 | G | 0    | 0      | A |
| 18 | BICF2S23150379          | 34615290 | A | 0    | 0      | G |
| 18 | BICF2P451587            | 34628366 | A | 0.75 | 0.6429 | G |
| 18 | BICF2P137280            | 34645941 | A | 0    | 0      | G |
| 18 | BICF2P137279            | 34646001 | G | 0    | 0      | A |
| 18 | BICF2P137278            | 34646059 | A | 0.5  | 0.5    | G |
| 18 | BICF2P1155833           | 34654355 | A | 0.25 | 0.3571 | G |
| 18 | BICF2P823053            | 34661484 | G | 0.5  | 0.5    | A |
| 18 | TIGRP2P248549_rs8724793 | 34669270 | C | 0    | 0      | A |
| 18 | BICF2P537302            | 34672765 | G | 0.5  | 0.5    | A |
| 18 | TIGRP2P248555_rs8769573 | 34693935 | G | 0.5  | 0.5    | A |
| 18 | TIGRP2P248556_rs8883428 | 34698527 | 0 | 0    | 0      | G |
| 18 | BICF2S23350988          | 34709556 | A | 0.5  | 0.5    | G |
| 18 | BICF2P1360465           | 34723234 | A | 0.25 | 0.1429 | G |
| 18 | BICF2S23516951          | 34730550 | G | 0.5  | 0.7143 | A |
| 18 | BICF2P89427             | 34764428 | A | 0    | 0      | G |
| 18 | BICF2P390062            | 34765148 | G | 0.25 | 0.3571 | A |
| 18 | BICF2S23729512          | 34785075 | G | 0.5  | 0.7143 | A |
| 18 | BICF2S23725718          | 34788631 | G | 0.5  | 0.7143 | A |
| 18 | BICF2P305605            | 34802067 | G | 0.5  | 0.5    | A |
| 18 | BICF2P1435603           | 34815932 | G | 0.25 | 0.1429 | A |
| 18 | TIGRP2P248610_rs9123034 | 34828576 | A | 0.25 | 0.1429 | G |
| 18 | BICF2P763021            | 34843915 | C | 0.25 | 0.3571 | A |
| 18 | BICF2S23021697          | 34845727 | A | 0.5  | 0.5    | G |
| 18 | BICF2S23060322          | 34857049 | A | 0.5  | 0.7143 | G |
| 18 | BICF2P127900            | 34874819 | G | 0    | 0      | C |
| 18 | BICF2P919035            | 34886716 | A | 0    | 0      | G |
| 18 | BICF2S23415265          | 34901205 | A | 0.25 | 0.3571 | G |
| 18 | BICF2S23448330          | 34907659 | G | 0.25 | 0.1429 | A |
| 18 | BICF2P289201            | 34915050 | G | 0.25 | 0.1429 | A |
| 18 | BICF2S23329246          | 34934172 | A | 0.5  | 0.5    | G |
| 18 | BICF2S22947786          | 34937488 | A | 0.25 | 0.1429 | G |
| 18 | BICF2P1124504           | 34952074 | A | 0.5  | 0.5    | G |
| 18 | BICF2S23421703          | 34967699 | G | 0.25 | 0.3571 | A |
| 18 | BICF2S23761861          | 34976887 | A | 0.5  | 0.5    | G |
| 18 | BICF2S2362284           | 34984850 | A | 0    | 0      | G |
| 18 | BICF2P1120936           | 35000713 | A | 0    | 0      | G |
| 18 | BICF2P1276316           | 35010980 | G | 0.25 | 0.1429 | A |
| 18 | BICF2P1065398           | 35018703 | A | 0.25 | 0.3571 | G |
| 18 | BICF2S22913552          | 35029911 | G | 0.25 | 0.3571 | A |
| 18 | TIGRP2P248702_rs8574682 | 35050760 | G | 0    | 0      | A |
| 18 | BICF2P85403             | 35061807 | A | 0.5  | 0.7143 | G |
| 18 | BICF2P229121            | 35065153 | A | 0    | 0      | G |
| 18 | BICF2P798423            | 35084178 | A | 0.5  | 0.5    | G |
| 18 | BICF2P310378            | 35094191 | A | 0.25 | 0.1429 | G |
| 18 | BICF2P1089358           | 35109167 | A | 0.75 | 0.8571 | G |
| 18 | BICF2P1326250           | 35110465 | A | 0.75 | 0.8571 | G |

|    |                         |          |   |      |        |   |
|----|-------------------------|----------|---|------|--------|---|
| 18 | BICF2S23534030          | 35124203 | A | 0    | 0      | G |
| 18 | BICF2P505485            | 35135559 | G | 0    | 0      | A |
| 18 | TIGRP2P248769_rs9053819 | 35151016 | A | 0.75 | 0.8571 | G |
| 18 | BICF2S23447367          | 35162665 | G | 0    | 0      | A |
| 18 | BICF2P129474            | 35163455 | A | 0.5  | 0.2857 | G |
| 18 | BICF2P1216748           | 35169287 | A | 0    | 0      | G |
| 18 | BICF2P565526            | 35180052 | G | 0.5  | 0.7143 | A |
| 18 | BICF2P528692            | 35195882 | A | 0.5  | 0.7143 | G |
| 18 | BICF2P488713            | 35206985 | G | 0    | 0      | A |
| 18 | BICF2P819217            | 35213107 | A | 0.5  | 0.7143 | G |
| 18 | BICF2P899175            | 35228502 | A | 0.5  | 0.2857 | G |
| 18 | BICF2S23133945          | 35241234 | A | 0    | 0      | G |
| 18 | BICF2S23029602          | 35252827 | A | 0    | 0      | G |
| 18 | BICF2S23640362          | 35266734 | A | 0    | 0      | C |
| 18 | BICF2P178479            | 35274055 | 0 | 0    | 0      | G |
| 18 | BICF2P289519            | 35287277 | 0 | 0    | 0      | A |
| 18 | BICF2P324868            | 35297004 | A | 0    | 0      | G |
| 18 | BICF2S23617180          | 35326124 | G | 0    | 0      | A |
| 18 | BICF2P1250780           | 35341121 | 0 | 0    | 0      | G |
| 18 | BICF2S23038210          | 35352634 | G | 0    | 0      | A |
| 18 | BICF2P1154648           | 35396318 | A | 0    | 0      | G |
| 18 | BICF2S23411827          | 35399257 | G | 0    | 0      | A |
| 18 | BICF2P1430120           | 35408903 | A | 0.25 | 0.2143 | G |
| 18 | BICF2P653284            | 35428355 | C | 0.5  | 0.3571 | A |
| 18 | BICF2S23327623          | 35439804 | A | 0    | 0      | G |
| 18 | BICF2P686667            | 35451303 | G | 0.5  | 0.4286 | A |
| 18 | TIGRP2P248829_rs8983746 | 35469467 | G | 0.75 | 0.6429 | A |
| 18 | BICF2S23351462          | 35472089 | A | 0.5  | 0.5    | G |
| 18 | BICF2S23016799          | 35478638 | A | 0.5  | 0.5    | G |
| 18 | BICF2P506277            | 35507360 | G | 0.25 | 0.2143 | A |
| 18 | TIGRP2P248855_rs8734248 | 35514322 | G | 0.25 | 0.2143 | A |
| 18 | BICF2S2379940           | 35534837 | G | 0.5  | 0.6429 | A |
| 18 | BICF2P1208879           | 35534955 | G | 0.5  | 0.6429 | A |
| 18 | BICF2P527939            | 35546215 | C | 0.25 | 0.2143 | A |
| 18 | BICF2S2349969           | 35548094 | G | 0    | 0      | A |
| 18 | BICF2S23914870          | 35559838 | C | 0.25 | 0.1429 | A |
| 18 | BICF2S23352351          | 35559917 | A | 0    | 0      | G |
| 18 | BICF2P1362704           | 35563642 | 0 | 0    | 0      | C |
| 18 | BICF2P504981            | 35568908 | A | 0.5  | 0.3571 | G |
| 18 | BICF2P122735            | 35570859 | C | 0.5  | 0.3571 | A |
| 18 | BICF2P1017405           | 35602725 | A | 1    | 1      | G |
| 18 | BICF2S24412032          | 35609924 | A | 0.5  | 0.4286 | G |
| 18 | BICF2S23058619          | 35621768 | G | 0.75 | 0.7143 | A |
| 18 | BICF2S23547257          | 35643607 | G | 0.5  | 0.5714 | A |
| 18 | BICF2S23048696          | 35661833 | A | 0.5  | 0.4286 | G |
| 18 | BICF2P907782            | 35675972 | 0 | 0    | 0      | G |
| 18 | BICF2P1453648           | 35686219 | 0 | 0    | 0      | C |

|    |                         |          |   |      |        |   |
|----|-------------------------|----------|---|------|--------|---|
| 18 | BICF2P1453649           | 35688257 | T | 0    | 0      | A |
| 18 | BICF2S23716427          | 35698312 | A | 0    | 0      | C |
| 18 | BICF2P1123302           | 35709988 | G | 0    | 0      | A |
| 18 | TIGRP2P248883_rs8683316 | 35715162 | A | 0.25 | 0.2143 | G |
| 18 | BICF2S23137163          | 35721290 | A | 0.25 | 0.2143 | G |
| 18 | TIGRP2P248889_rs8756461 | 35733240 | G | 0    | 0      | A |
| 18 | BICF2P1026293           | 35770272 | 0 | 0    | 0      | A |
| 18 | BICF2S23060993          | 35777729 | G | 0.25 | 0.2143 | A |
| 18 | BICF2G630700466         | 35814241 | A | 0.5  | 0.5714 | C |
| 18 | BICF2G630700462         | 35825129 | A | 0.75 | 0.8571 | G |
| 18 | BICF2G630700440         | 35834083 | G | 0    | 0      | A |
| 18 | BICF2G630700425         | 35854031 | G | 0    | 0      | A |
| 18 | BICF2S2338069           | 35863091 | G | 0    | 0      | A |
| 18 | BICF2G630700420         | 35875582 | A | 0    | 0      | G |
| 18 | BICF2S23320281          | 35887716 | G | 0.5  | 0.6429 | A |
| 18 | BICF2P941320            | 35892474 | A | 0.25 | 0.3571 | G |
| 18 | BICF2S23328890          | 35909379 | A | 0    | 0      | G |
| 18 | BICF2P733627            | 35923332 | G | 0.5  | 0.6429 | A |
| 18 | BICF2S23242868          | 35927181 | A | 0.25 | 0.2857 | G |
| 18 | BICF2G630700411         | 35953167 | G | 0.25 | 0.2857 | A |
| 18 | BICF2G630700395         | 35963147 | A | 0    | 0      | G |
| 18 | BICF2G630700384         | 35975856 | A | 0    | 0      | G |
| 18 | BICF2G630700364         | 35992448 | A | 0.25 | 0.2857 | C |
| 18 | BICF2G630700354         | 36005370 | C | 0    | 0      | A |
| 18 | BICF2G630700352         | 36009841 | G | 0    | 0      | A |
| 18 | BICF2G630700341         | 36019515 | A | 0.25 | 0.2857 | C |
| 18 | BICF2G630700328         | 36040790 | A | 0.5  | 0.6429 | G |
| 18 | BICF2S23648389          | 36041981 | A | 0.5  | 0.6429 | G |
| 18 | BICF2G630700319         | 36053400 | G | 0.25 | 0.3571 | A |
| 18 | BICF2G630700309         | 36065645 | G | 0.5  | 0.6429 | A |
| 18 | BICF2G630700302         | 36076911 | C | 0.25 | 0.3571 | A |
| 18 | TIGRP2P248939_rs8935955 | 36096830 | C | 0.5  | 0.3571 | A |
| 18 | TIGRP2P248955_rs9197510 | 36109412 | G | 0.5  | 0.3571 | A |
| 18 | BICF2G630700301         | 36110817 | 0 | 0    | 0      | T |
| 18 | BICF2P88506             | 36125616 | G | 0    | 0.3571 | A |
| 18 | TIGRP2P248967_rs9089130 | 36131185 | A | 0.5  | 0.3571 | G |
| 18 | BICF2P1363610           | 36141052 | G | 0.5  | 0.3571 | A |
| 18 | BICF2G630700300         | 36153950 | A | 0    | 0      | G |
| 18 | TIGRP2P248983_rs8536064 | 36156037 | 0 | 0    | 0      | G |
| 18 | BICF2G630700293         | 36167711 | G | 0.5  | 0.3571 | A |
| 18 | BICF2G630700266         | 36179709 | A | 0.5  | 0.3571 | G |
| 18 | BICF2P1168903           | 36195426 | A | 0    | 0      | G |
| 18 | BICF2S23324115          | 36206076 | A | 0.25 | 0.3571 | G |
| 18 | BICF2S2323498           | 36216432 | A | 0.75 | 0.7143 | C |
| 18 | BICF2G630700236         | 36227212 | G | 0.5  | 0.3571 | A |
| 18 | BICF2G630700212         | 36236829 | A | 0.5  | 0.3571 | G |
| 18 | BICF2G630700205         | 36248987 | C | 0    | 0      | A |

|    |                         |          |   |      |        |   |
|----|-------------------------|----------|---|------|--------|---|
| 18 | BICF2P895710            | 36267982 | G | 0.5  | 0.3571 | C |
| 18 | BICF2G630700201         | 36268819 | A | 0    | 0      | G |
| 18 | BICF2G630700199         | 36272611 | G | 0.5  | 0.3571 | A |
| 18 | BICF2G630700172         | 36283254 | A | 0.75 | 0.6429 | G |
| 18 | TIGRP2P249037_rs8759877 | 36297619 | G | 0.25 | 0.2857 | A |
| 18 | TIGRP2P249047_rs8746652 | 36305993 | A | 0    | 0      | G |
| 18 | BICF2P658094            | 36322289 | 0 | 0    | 0      | A |
| 18 | BICF2G630700164         | 36328987 | A | 0.75 | 0.6429 | G |
| 18 | BICF2G630700153         | 36341751 | A | 0.75 | 0.6429 | G |
| 18 | BICF2S23651505          | 36354683 | G | 0    | 0      | A |
| 18 | BICF2G630700121         | 36372189 | A | 0.25 | 0.3571 | G |
| 18 | TIGRP2P249058_rs9169104 | 36378371 | C | 0    | 0      | A |
| 18 | BICF2P1205692           | 36382931 | A | 0.25 | 0.3571 | G |
| 18 | BICF2G630700095         | 36389037 | A | 0.75 | 0.6429 | G |
| 18 | BICF2G630700081         | 36404323 | C | 1    | 1      | G |
| 18 | BICF2S23047701          | 36404913 | C | 0.5  | 0.3333 | A |
| 18 | BICF2G630700065         | 36417803 | A | 0.5  | 0.6429 | G |
| 18 | BICF2G630700048         | 36420863 | G | 0.5  | 0.6429 | A |
| 18 | BICF2G630700025         | 36434393 | A | 0.25 | 0.3571 | G |
| 18 | BICF2G630700003         | 36446386 | G | 0.5  | 0.6429 | A |
| 18 | BICF2G630699999         | 36460142 | G | 0.5  | 0.3571 | A |
| 18 | BICF2S237363            | 36470156 | G | 0.5  | 0.3571 | A |
| 18 | BICF2G630699967         | 36488895 | G | 0.25 | 0.2857 | A |
| 18 | BICF2G630699963         | 36489613 | A | 0.25 | 0.2857 | G |
| 18 | BICF2G630699945         | 36505206 | A | 0.25 | 0.3571 | G |
| 18 | BICF2G630699931         | 36513109 | A | 0.25 | 0.2857 | C |
| 18 | TIGRP2P249099_rs8796305 | 36525035 | G | 0.25 | 0.3571 | C |
| 18 | BICF2P699887            | 36539914 | A | 0    | 0      | G |
| 18 | BICF2G630699892         | 36544890 | A | 0    | 0      | G |
| 18 | BICF2G630699890         | 36546573 | G | 0.25 | 0.3571 | A |
| 18 | BICF2G630699871         | 36552987 | A | 0.25 | 0.3571 | G |
| 18 | BICF2P187091            | 36562646 | A | 0.25 | 0.1429 | G |
| 18 | BICF2G630699854         | 36571236 | A | 0    | 0.3333 | G |
| 18 | BICF2G630699837         | 36583375 | A | 0    | 0      | G |
| 18 | BICF2P823678            | 36594981 | A | 0.5  | 0.5    | G |
| 18 | BICF2P1367050           | 36604223 | G | 0    | 0      | A |
| 18 | BICF2G630699826         | 36608489 | A | 0.25 | 0.3571 | G |
| 18 | BICF2P1199491           | 36620195 | G | 0.25 | 0.1429 | A |
| 18 | BICF2G630699812         | 36628139 | G | 0.5  | 0.3571 | A |
| 18 | TIGRP2P249162_rs8962544 | 36639874 | 0 | 0    | 0      | G |
| 18 | TIGRP2P249176_rs9005988 | 36669634 | 0 | 0    | 0      | C |
| 18 | TIGRP2P249177_rs8694296 | 36677492 | 0 | 0    | 0      | G |
| 18 | BICF2G630699771         | 36692525 | A | 0    | 0      | G |
| 18 | BICF2G630699770         | 36721081 | 0 | 0    | 0      | T |
| 18 | BICF2S23449820          | 36739703 | A | 0.25 | 0.2857 | G |
| 18 | BICF2S23236118          | 36757041 | G | 0.25 | 0.2143 | C |
| 18 | BICF2P382043            | 36770226 | C | 0    | 0      | A |

|    |                         |          |   |      |        |   |
|----|-------------------------|----------|---|------|--------|---|
| 18 | BICF2S23153554          | 36785356 | A | 0    | 0      | G |
| 18 | BICF2G630699763         | 36807358 | A | 0.25 | 0.2143 | G |
| 18 | BICF2G630699761         | 36856415 | A | 0    | 0      | G |
| 18 | BICF2S23618725          | 36864187 | A | 0    | 0      | C |
| 18 | BICF2G630699758         | 36872431 | G | 0    | 0      | A |
| 18 | BICF2G630699734         | 36881708 | A | 0.25 | 0.1429 | G |
| 18 | BICF2G630699717         | 36892652 | A | 0.25 | 0.1429 | G |
| 18 | BICF2S23417003          | 36905271 | G | 0    | 0      | A |
| 18 | BICF2P267716            | 36915664 | A | 0    | 0      | G |
| 18 | BICF2P889913            | 36928725 | A | 0.25 | 0.1429 | G |
| 18 | BICF2P1347810           | 36942958 | G | 0.25 | 0.2857 | A |
| 18 | BICF2S23736479          | 36958833 | A | 0.25 | 0.2857 | G |
| 18 | BICF2G630699702         | 36961681 | G | 0.5  | 0.5714 | A |
| 18 | BICF2P519810            | 36983010 | 0 | 0    | 0      | G |
| 18 | BICF2S23646707          | 36994199 | A | 0    | 0      | G |
| 18 | BICF2S23435017          | 37006729 | G | 0.75 | 0.8571 | A |
| 18 | BICF2G630699699         | 37011040 | A | 0    | 0      | G |
| 18 | BICF2S23246066          | 37023905 | G | 0.5  | 0.5714 | A |
| 18 | BICF2G630699696         | 37040226 | A | 0    | 0      | G |
| 18 | BICF2G630699685         | 37044331 | G | 0    | 0      | C |
| 18 | BICF2G630699679         | 37050710 | G | 0    | 0      | A |
| 18 | BICF2G630699659         | 37061167 | A | 0    | 0      | G |
| 18 | BICF2P1171246           | 37062807 | 0 | 0    | 0      | C |
| 18 | BICF2G630699646         | 37071601 | G | 0.25 | 0.1429 | A |
| 18 | BICF2P1171390           | 37076423 | A | 0.25 | 0.1429 | G |
| 18 | BICF2P210569            | 37088531 | A | 0    | 0      | C |
| 18 | BICF2P844491            | 37101919 | A | 0    | 0      | G |
| 18 | BICF2P523032            | 37103243 | A | 0    | 0      | T |
| 18 | BICF2P1432081           | 37121723 | G | 0.25 | 0.2143 | A |
| 18 | TIGRP2P249212_rs8518923 | 37122391 | 0 | 0    | 0      | A |
| 18 | BICF2P1053194           | 37146657 | G | 0    | 0      | A |
| 18 | BICF2P104347            | 37162700 | A | 0    | 0      | C |
| 18 | BICF2G630699605         | 37172935 | A | 0.25 | 0.2143 | G |
| 18 | BICF2G630699578         | 37188392 | A | 0.5  | 0.6429 | G |
| 18 | BICF2G630699568         | 37194269 | A | 0.5  | 0.6429 | G |
| 18 | TIGRP2P249233_rs9225821 | 37207669 | T | 0    | 0      | A |
| 18 | BICF2G630699525         | 37219425 | A | 0.25 | 0.3333 | G |
| 18 | TIGRP2P249241_rs8992596 | 37224172 | A | 0    | 0      | G |
| 18 | BICF2G630699520         | 37227498 | G | 0.25 | 0.2143 | A |
| 18 | BICF2G630699492         | 37241786 | 0 | 0    | 0      | G |
| 18 | BICF2G630699491         | 37244480 | G | 0.25 | 0.2857 | A |
| 18 | BICF2P196224            | 37250900 | G | 0    | 0      | A |
| 18 | BICF2P1111471           | 37263968 | G | 0.25 | 0.3571 | A |
| 18 | BICF2G630699464         | 37279704 | A | 0.25 | 0.3571 | G |
| 18 | TIGRP2P249258_rs8878576 | 37283359 | A | 0    | 0      | G |
| 18 | TIGRP2P249261_rs8698374 | 37295045 | A | 0.5  | 0.6429 | G |
| 18 | BICF2G630699437         | 37308941 | A | 0.25 | 0.3571 | G |

|    |                         |          |   |      |        |   |
|----|-------------------------|----------|---|------|--------|---|
| 18 | BICF2G630699427         | 37324176 | G | 0.5  | 0.5    | A |
| 18 | BICF2G630699421         | 37345830 | A | 0    | 0      | G |
| 18 | BICF2G630699419         | 37353083 | C | 0.5  | 0.5    | A |
| 18 | BICF2G630699410         | 37385781 | A | 0.5  | 0.5    | G |
| 18 | BICF2G630699408         | 37389951 | C | 0.5  | 0.5    | A |
| 18 | BICF2G630699395         | 37407591 | G | 0.5  | 0.5    | A |
| 18 | BICF2P121685            | 37414680 | A | 0.5  | 0.5    | G |
| 18 | BICF2S23757781          | 37441489 | G | 0    | 0      | A |
| 18 | BICF2S23750902          | 37460953 | A | 0    | 0      | G |
| 18 | BICF2P158413            | 37496116 | 0 | 0    | 0      | G |
| 18 | BICF2P1358450           | 37512558 | A | 0.25 | 0.1429 | G |
| 18 | BICF2P1358456           | 37513577 | A | 1    | 1      | G |
| 18 | TIGRP2P249288_rs9205220 | 37542914 | 0 | 0    | 0      | A |
| 18 | BICF2P950849            | 37553821 | C | 0.25 | 0.1429 | A |
| 18 | BICF2P647037            | 37562832 | G | 0.25 | 0.1429 | A |
| 18 | BICF2P619669            | 37586162 | 0 | 0    | 0      | A |
| 18 | BICF2S23435503          | 37597915 | A | 0.75 | 0.6429 | G |
| 18 | TIGRP2P249291_rs8800682 | 37600713 | G | 0.75 | 0.6429 | A |
| 18 | BICF2P1110281           | 37615852 | A | 0.75 | 0.6429 | C |
| 18 | BICF2P1110279           | 37617597 | A | 0.75 | 0.6429 | G |
| 18 | BICF2P649973            | 37636316 | A | 0.5  | 0.5    | G |
| 18 | BICF2S23645229          | 37651399 | A | 0    | 0      | G |
| 18 | BICF2P181908            | 37678365 | G | 0.5  | 0.5    | A |
| 18 | BICF2S23915109          | 37693954 | A | 0.5  | 0.5    | T |
| 18 | BICF2P228127            | 37697123 | G | 0.5  | 0.5    | A |
| 18 | BICF2P1234435           | 37717873 | G | 0.5  | 0.5    | A |
| 18 | BICF2P244525            | 37725704 | A | 0.5  | 0.5    | G |
| 18 | TIGRP2P249342_rs9197969 | 37734894 | G | 0.5  | 0.5    | A |
| 18 | BICF2P744500            | 37745974 | A | 0.5  | 0.5    | T |
| 18 | G1025f26S230            | 37765737 | 0 | 0    | 0      | C |
| 18 | BICF2S2395716           | 37782401 | G | 0    | 0      | A |
| 18 | BICF2P144137            | 37792283 | A | 0.5  | 0.5    | T |
| 18 | BICF2P167864            | 37807942 | 0 | 0    | 0      | A |
| 18 | TIGRP2P249377_rs9163659 | 37830734 | A | 0    | 0      | G |
| 18 | TIGRP2P249381_rs8818009 | 37857333 | G | 0.5  | 0.5    | C |
| 18 | BICF2S23328854          | 37858016 | A | NA   | 0.5    | G |
| 18 | BICF2P908204            | 37878731 | T | 0.5  | 0.5    | A |
| 18 | TIGRP2P249386_rs8916514 | 37882530 | A | 0.5  | 0.5    | G |
| 18 | BICF2S23623571          | 37898478 | 0 | 0    | 0      | G |
| 18 | BICF2P408458            | 37905255 | 0 | 0    | 0      | C |
| 18 | TIGRP2P249402_rs8525855 | 37921216 | G | 0.5  | 0.5    | A |
| 18 | BICF2S23334900          | 37927805 | A | 0.5  | 0.5    | G |
| 18 | TIGRP2P249414_rs9111850 | 37943163 | A | 0.5  | 0.5    | G |
| 18 | BICF2S2291718           | 37958532 | G | 0.5  | 0.5    | A |
| 18 | BICF2P845423            | 37962794 | A | 0    | 0      | G |
| 18 | BICF2P105676            | 37988092 | A | 0.5  | 0.5    | G |
| 18 | BICF2P106455            | 37997485 | 0 | 0    | 0      | A |



|    |                         |          |   |      |        |   |
|----|-------------------------|----------|---|------|--------|---|
| 18 | BICF2P99668             | 38013228 | A | 0    | 0      | G |
| 18 | BICF2G630699371         | 38021763 | G | 0.75 | 0.8571 | A |
| 18 | BICF2G630699365         | 38030506 | A | 0.75 | 0.8571 | C |
| 18 | TIGRP2P249434_rs8613339 | 38042219 | A | 0.25 | 0.1429 | G |
| 18 | BICF2G630699335         | 38053978 | A | 0.75 | 0.8571 | G |
| 18 | BICF2G630699318         | 38067244 | A | 1    | 1      | G |
| 18 | BICF2G630699292         | 38077396 | A | 0.75 | 0.8571 | G |
| 18 | BICF2G630699278         | 38088812 | A | 0.5  | 0.5    | C |
| 18 | BICF2G630699247         | 38101257 | A | 0    | 0      | G |
| 18 | BICF2G630699240         | 38117064 | 0 | 0    | 0      | C |
| 18 | TIGRP2P249471_rs8946748 | 38128408 | C | 0    | 0      | A |
| 18 | BICF2G630699228         | 38135364 | A | 0.25 | 0.3333 | G |
| 18 | BICF2G630699227         | 38138219 | A | 0.25 | 0.1429 | C |
| 18 | BICF2G630699221         | 38139289 | A | 0.25 | 0.3571 | T |
| 18 | BICF2P1363812           | 38153587 | G | 0.5  | 0.5    | A |
| 18 | BICF2G630699182         | 38162268 | A | 0.25 | 0.1429 | T |
| 18 | BICF2G630699150         | 38179449 | A | 0.25 | 0.1429 | G |
| 18 | BICF2G630699136         | 38185045 | A | 1    | 1      | G |
| 18 | BICF2P153298            | 38192530 | A | 0.25 | 0.1429 | G |
| 18 | BICF2G630699100         | 38208316 | 0 | 0    | 0      | G |
| 18 | BICF2G630699091         | 38215303 | A | 0.25 | 0.1429 | G |
| 18 | BICF2G630699082         | 38222350 | A | 0.75 | 0.8571 | G |
| 18 | BICF2G630699077         | 38230782 | A | 0.5  | 0.5    | G |
| 18 | BICF2G630699060         | 38237962 | A | 0.5  | 0.5    | G |
| 18 | TIGRP2P249508_rs8524214 | 38249673 | G | 0.5  | 0.5    | A |
| 18 | BICF2G630699010         | 38262120 | G | 0    | 0      | A |
| 18 | BICF2G630698984         | 38275074 | 0 | 0    | 0      | G |
| 18 | BICF2P826458            | 38284177 | A | 0    | 0      | G |
| 18 | TIGRP2P249522_rs9079492 | 38298646 | C | 0    | 0      | A |
| 18 | BICF2P1357215           | 38314572 | C | 0.75 | 0.6429 | A |
| 18 | BICF2G630698972         | 38323227 | A | 0    | 0      | G |
| 18 | TIGRP2P249531_rs8902370 | 38334832 | G | 0    | 0      | A |
| 18 | BICF2P605598            | 38341554 | A | 0.75 | 0.6429 | G |
| 18 | BICF2S22928850          | 38353196 | C | 0.5  | 0.5    | A |
| 18 | BICF2P1035151           | 38364253 | A | 0.5  | 0.5    | G |
| 18 | BICF2G630698920         | 38364463 | A | 0    | 0      | G |
| 18 | BICF2G630698897         | 38381034 | A | 0    | 0      | G |
| 18 | BICF2P560336            | 38386507 | A | 0.5  | 0.5    | G |
| 18 | BICF2P454541            | 38398213 | A | 1    | 1      | G |
| 18 | BICF2P252160            | 38399489 | A | 0    | 0      | G |
| 18 | TIGRP2P249584_rs9012139 | 38420305 | A | 0    | 0      | G |
| 18 | BICF2P500172            | 38429492 | A | 0    | 0      | G |
| 18 | TIGRP2P249586_rs9041282 | 38429604 | A | 0    | 0      | T |
| 18 | BICF2G630698889         | 38436498 | A | 0    | 0      | G |
| 18 | BICF2G630698885         | 38446685 | A | 0    | 0      | C |
| 18 | BICF2G630698848         | 38463977 | G | 0.75 | 0.6429 | A |
| 18 | BICF2G630698838         | 38467936 | C | 0.75 | 0.6429 | A |

|    |                         |          |   |      |        |   |
|----|-------------------------|----------|---|------|--------|---|
| 18 | BICF2G630698833         | 38479215 | G | 0.25 | 0.3571 | A |
| 18 | BICF2P475486            | 38484015 | A | 0.5  | 0.5    | G |
| 18 | BICF2G630698802         | 38494466 | G | 0    | 0      | A |
| 18 | BICF2G630698783         | 38505644 | C | 0    | 0      | A |
| 18 | BICF2G630698765         | 38522664 | A | 0    | 0      | G |
| 18 | BICF2G630698764         | 38523060 | A | 0.25 | 0.3571 | G |
| 18 | TIGRP2P249616_rs9188824 | 38531138 | A | 0.75 | 0.6429 | G |
| 18 | BICF2G630698752         | 38534589 | A | 0.25 | 0.3571 | G |
| 18 | BICF2G630698751         | 38540981 | A | 0.25 | 0.3571 | G |
| 18 | BICF2G630698749         | 38558276 | C | 0.75 | 0.8571 | A |
| 18 | BICF2P1075704           | 38558879 | A | 0    | 0      | G |
| 18 | BICF2G630698739         | 38561849 | A | 0.75 | 0.8571 | C |
| 18 | BICF2G630698697         | 38573599 | C | 0.25 | 0.3571 | A |
| 18 | BICF2G630698682         | 38592367 | A | 0    | 0      | C |
| 18 | BICF2S23729345          | 38598328 | C | 0.5  | 0.5    | A |
| 18 | TIGRP2P249631_rs9106502 | 38608577 | A | 0    | 0      | G |
| 18 | BICF2S23417562          | 38620088 | C | 0.5  | 0.5    | A |
| 18 | BICF2P1379035           | 38639255 | G | 0.25 | 0.3571 | A |
| 18 | BICF2G630698618         | 38650286 | A | 0.25 | 0.1429 | T |
| 18 | BICF2G630698616         | 38656160 | A | 0    | 0      | G |
| 18 | BICF2G630698608         | 38669358 | A | 0.25 | 0.3333 | C |
| 18 | BICF2G630698605         | 38692310 | G | 0.75 | 0.8571 | A |
| 18 | BICF2G630698595         | 38708301 | A | 0.75 | 0.8571 | G |
| 18 | BICF2G630698593         | 38710694 | A | 0    | 0      | G |
| 18 | BICF2S23117508          | 38731557 | A | 0.25 | 0.1429 | C |
| 18 | BICF2G630698581         | 38734971 | A | 0    | 0      | G |
| 18 | BICF2G630698580         | 38743665 | 0 | 0    | 0      | A |
| 18 | TIGRP2P249649_rs9218478 | 38758216 | 0 | 0    | 0      | A |
| 18 | TIGRP2P249650_rs9071203 | 38766974 | C | 0.25 | 0.1429 | A |
| 18 | TIGRP2P249653_rs8652855 | 38784822 | C | 0.25 | 0.1429 | A |
| 18 | BICF2G630698543         | 38796624 | G | 0    | 0      | A |
| 18 | BICF2P221991            | 38815848 | G | 0    | 0      | A |
| 18 | BICF2G630698539         | 38824541 | A | 0.75 | 0.8571 | G |
| 18 | TIGRP2P249662_rs8722494 | 38837601 | 0 | 0    | 0      | G |
| 18 | BICF2P906133            | 38868118 | A | 0.25 | 0.1429 | G |
| 18 | BICF2S23024725          | 38896084 | G | 0    | 0      | A |
| 18 | TIGRP2P249669_rs8746226 | 38915644 | A | 0    | 0      | G |
| 18 | BICF2S23452416          | 38916201 | 0 | 0    | 0      | G |
| 18 | BICF2P211432            | 38935604 | A | 0.25 | 0.1429 | G |
| 18 | BICF2G630698522         | 38941956 | A | 0.75 | 0.8571 | G |
| 18 | BICF2P680961            | 38952048 | A | 0.25 | 0.1429 | G |
| 18 | BICF2P940226            | 38963195 | A | 0.25 | 0.1429 | G |
| 18 | BICF2P1124875           | 38980183 | G | 0    | 0      | A |
| 18 | TIGRP2P249689_rs8761558 | 38986327 | A | 0    | 0      | G |
| 18 | TIGRP2P249693_rs9067153 | 38997727 | A | 0.25 | 0.1429 | C |
| 18 | TIGRP2P249698_rs9130916 | 39013882 | A | 0    | 0      | G |
| 18 | TIGRP2P249700_rs8623651 | 39021704 | A | 0    | 0      | G |

|    |                         |          |   |      |        |   |
|----|-------------------------|----------|---|------|--------|---|
| 18 | BICF2P7686              | 39033275 | A | 0    | 0      | G |
| 18 | TIGRP2P249727_rs8503956 | 39049664 | G | 0    | 0      | A |
| 18 | TIGRP2P249733_rs8726891 | 39055455 | G | 0    | 0      | A |
| 18 | BICF2P708749            | 39073807 | G | 0    | 0      | A |
| 18 | BICF2P552925            | 39082780 | G | 0    | 0      | A |
| 18 | BICF2G630698515         | 39099809 | A | 0    | 0      | C |
| 18 | BICF2G630698510         | 39110448 | 0 | 0    | 0      | G |
| 18 | BICF2G630698508         | 39117667 | 0 | 0    | 0      | G |
| 18 | BICF2G630698506         | 39130029 | A | 0    | 0      | G |
| 18 | BICF2G630698502         | 39139545 | 0 | 0    | 0      | A |
| 18 | BICF2G630698490         | 39147521 | G | 0.75 | 0.8571 | A |
| 18 | BICF2P1417172           | 39166160 | G | 0.75 | 0.8571 | A |
| 18 | TIGRP2P249747_rs8815266 | 39172779 | A | 0.25 | 0.1429 | G |
| 18 | BICF2P25540             | 39190306 | G | 0.25 | 0.1429 | A |
| 18 | BICF2G630698464         | 39196795 | G | 0    | 0      | A |
| 18 | BICF2S23348406          | 39206171 | 0 | 0    | 0      | G |
| 18 | BICF2G630698432         | 39220009 | G | 0.25 | 0.1429 | A |
| 18 | BICF2G630698410         | 39229568 | A | 0.25 | 0.1429 | C |
| 18 | BICF2G630698401         | 39249389 | G | 0    | 0      | A |
| 18 | BICF2G630698397         | 39251360 | G | 0    | 0      | A |
| 18 | BICF2G630698383         | 39269965 | G | 0.25 | 0.1429 | A |
| 18 | BICF2P852769            | 39283396 | G | 0    | 0      | C |
| 18 | BICF2G630698363         | 39284697 | A | 0.25 | 0.1429 | G |
| 18 | TIGRP2P249774_rs8978044 | 39305353 | A | 0.25 | 0.1429 | G |
| 18 | BICF2P554051            | 39308042 | A | 0.25 | 0.1429 | G |
| 18 | BICF2G630698352         | 39318691 | G | 0.25 | 0.1429 | A |
| 18 | BICF2P1452158           | 39331876 | C | 0    | 0      | G |
| 18 | BICF2P371119            | 39343683 | G | 1    | 1      | A |
| 18 | BICF2P1309329           | 39356201 | A | 1    | 1      | G |
| 18 | BICF2P82544             | 39369909 | T | 1    | 1      | A |
| 18 | BICF2G630698335         | 39384825 | A | 0    | 0.1429 | G |
| 18 | BICF2G630698333         | 39388879 | A | 0.25 | 0.1429 | G |
| 18 | BICF2S23454699          | 39402584 | G | 0    | 0      | A |
| 18 | BICF2G630698309         | 39414577 | G | 0.25 | 0.1429 | A |
| 18 | BICF2G630698297         | 39425494 | G | 0.25 | 0.1429 | A |
| 18 | BICF2G630698295         | 39433655 | G | 0.25 | 0.1429 | A |
| 18 | BICF2G630698280         | 39446708 | A | 0    | 0      | G |
| 18 | BICF2G630698265         | 39456675 | A | 0.75 | 0.8571 | G |
| 18 | BICF2G630698257         | 39470945 | C | 0    | 0      | G |
| 18 | BICF2G630698255         | 39485879 | C | 0    | 0      | A |
| 18 | BICF2G630698247         | 39493338 | A | 0    | 0      | G |
| 18 | BICF2G630698237         | 39502849 | A | 0    | 0      | G |
| 18 | BICF2G630698234         | 39515473 | A | 1    | 1      | G |
| 18 | BICF2G630698205         | 39526180 | A | 0    | 0      | C |
| 18 | BICF2G630698178         | 39547369 | G | 0    | 0      | A |
| 18 | BICF2G630698177         | 39548986 | C | 0    | 0      | A |
| 18 | BICF2P929403            | 39561496 | G | 1    | 1      | A |

|    |                         |          |   |      |        |   |
|----|-------------------------|----------|---|------|--------|---|
| 18 | BICF2G630698138         | 39572057 | G | 0.25 | 0.3571 | A |
| 18 | BICF2G630698114         | 39589449 | G | 0.25 | 0.1429 | A |
| 18 | BICF2G630698094         | 39595409 | G | 0.5  | 0.5    | A |
| 18 | BICF2G630698075         | 39605760 | A | 0.75 | 0.6429 | G |
| 18 | BICF2P914789            | 39610576 | A | 0.75 | 0.6429 | G |
| 18 | BICF2G630698058         | 39620127 | G | 0    | 0      | A |
| 18 | BICF2G630698028         | 39632352 | A | 0    | 0      | C |
| 18 | BICF2P721187            | 39640519 | A | 0    | 0      | C |
| 18 | BICF2P601930            | 39652946 | 0 | 0    | 0      | G |
| 18 | BICF2G630697988         | 39663817 | A | 0    | 0      | G |
| 18 | BICF2S2297963           | 39677340 | G | 0.5  | 0.5    | A |
| 18 | BICF2P324216            | 39694489 | 0 | 0    | 0      | C |
| 18 | BICF2G630697941         | 39702060 | A | 0    | 0      | G |
| 18 | BICF2G630697933         | 39705437 | G | 0    | 0      | A |
| 18 | BICF2G630697924         | 39714615 | A | 0    | 0      | G |
| 18 | BICF2G630697918         | 39721086 | G | 0.25 | 0.1429 | A |
| 18 | TIGRP2P249821_rs8900442 | 39736310 | 0 | 0    | 0      | C |
| 18 | BICF2S2346335           | 39745066 | A | 0    | 0      | G |
| 18 | BICF2G630697880         | 39756637 | A | 0.75 | 0.8571 | C |
| 18 | BICF2G630697857         | 39769718 | A | 0    | 0      | G |
| 18 | BICF2G630697845         | 39784619 | A | 0    | 0      | G |
| 18 | TIGRP2P249829_rs8810545 | 39790835 | 0 | 0    | 0      | A |
| 18 | BICF2G630697819         | 39803783 | A | 0    | 0      | G |
| 18 | BICF2P1203787           | 39822085 | A | 0    | 0      | C |
| 18 | BICF2G630697807         | 39828116 | G | 0    | 0      | A |
| 18 | BICF2S23719815          | 39847399 | A | 1    | 1      | G |
| 18 | BICF2P678138            | 39856228 | G | 0    | 0      | A |
| 18 | BICF2G630697776         | 39865188 | A | 0    | 0      | G |
| 18 | BICF2P252425            | 39874011 | 0 | 0    | 0      | T |
| 18 | BICF2P513351            | 39891711 | A | 0    | 0      | G |
| 18 | BICF2G630697764         | 39895955 | A | 0    | 0      | G |
| 18 | BICF2G630697758         | 39900180 | A | 0    | 0      | G |
| 18 | BICF2G630697745         | 39908444 | G | 0    | 0      | A |
| 18 | BICF2G630697722         | 39917622 | A | 0.75 | 0.8571 | G |
| 18 | BICF2P691923            | 39929278 | A | 0    | 0      | C |
| 18 | BICF2G630697686         | 39943682 | A | 0.75 | 0.8571 | G |
| 18 | BICF2G630697678         | 39951116 | A | 0    | 0      | G |
| 18 | BICF2P762153            | 39965724 | A | 1    | 1      | G |
| 18 | BICF2P1092654           | 39970295 | G | 0    | 0      | A |
| 18 | BICF2G630697638         | 39976131 | G | 0.25 | 0.3571 | A |
| 18 | BICF2G630697619         | 39993824 | G | 0.75 | 0.6429 | A |
| 18 | BICF2G630697603         | 39998495 | G | 1    | 1      | A |
| 18 | BICF2G630697596         | 40005178 | G | 1    | 1      | A |
| 18 | BICF2G630697595         | 40005459 | C | 1    | 1      | A |
| 18 | BICF2G630697585         | 40014923 | G | 0    | 0      | A |
| 18 | BICF2P56734             | 40025690 | G | 0.25 | 0.3571 | A |
| 18 | BICF2S23140236          | 40042518 | A | 0.25 | 0.1429 | C |

|    |                         |          |   |      |        |   |
|----|-------------------------|----------|---|------|--------|---|
| 18 | BICF2P1437423           | 40046551 | C | 0.5  | 0.5    | A |
| 18 | TIGRP2P249870_rs8872741 | 40055270 | A | 0.75 | 0.8571 | C |
| 18 | BICF2P1373864           | 40076392 | G | 0.25 | 0.3571 | A |
| 18 | BICF2P809395            | 40086907 | A | 0    | 0      | G |
| 18 | TIGRP2P249888_rs9179303 | 40093754 | G | 0    | 0      | A |
| 18 | BICF2G630697538         | 40111812 | A | 0    | 0      | G |
| 18 | BICF2G630697521         | 40114056 | G | 0.75 | 0.6429 | A |
| 18 | BICF2G630697503         | 40131379 | A | 0    | 0      | G |
| 18 | BICF2G630697496         | 40136044 | A | 0    | 0      | T |
| 18 | TIGRP2P249912_rs8773304 | 40141430 | A | 0.25 | 0.1429 | T |
| 18 | BICF2P1028012           | 40141979 | G | 0    | 0      | A |
| 18 | BICF2G630697482         | 40148602 | A | 0.25 | 0.3571 | G |
| 18 | BICF2G630697461         | 40162746 | A | 0.25 | 0.3571 | G |
| 18 | BICF2P300004            | 40170451 | A | 0.75 | 0.8571 | G |
| 18 | BICF2G630697429         | 40184555 | G | 0.75 | 0.8571 | A |
| 18 | BICF2G630697402         | 40195878 | A | 0    | 0      | G |
| 18 | BICF2G630697372         | 40212791 | C | 0    | 0      | G |
| 18 | BICF2G630697352         | 40223465 | A | 0.25 | 0.3333 | G |
| 18 | BICF2G630697350         | 40227604 | G | 0.25 | 0.3571 | A |
| 18 | BICF2G630697334         | 40247983 | G | 0.25 | 0.3571 | A |
| 18 | BICF2G630697331         | 40254774 | A | 0.75 | 0.8571 | G |
| 18 | BICF2G630697310         | 40272386 | G | 0.25 | 0.1429 | A |
| 18 | BICF2G630697308         | 40278498 | A | 0.25 | 0.3571 | G |
| 18 | BICF2G630697300         | 40285318 | A | 0.25 | 0.3571 | G |
| 18 | BICF2S23534962          | 40303223 | A | 0    | 0      | G |
| 18 | BICF2G630697267         | 40314066 | A | 1    | 1      | G |
| 18 | BICF2G630697261         | 40324767 | A | 0    | 0      | G |
| 18 | BICF2G630697255         | 40336215 | A | 0    | 0      | G |
| 18 | BICF2G630697247         | 40342210 | A | 0    | 0      | G |
| 18 | BICF2P768118            | 40355763 | A | 1    | 1      | C |
| 18 | BICF2G630697237         | 40367227 | A | 0    | 0      | G |
| 18 | BICF2G630697214         | 40377033 | G | 0    | 0      | A |
| 18 | BICF2G630697172         | 40388114 | G | 0    | 0      | A |
| 18 | TIGRP2P250034_rs8555797 | 40406720 | A | 0.25 | 0.1429 | G |
| 18 | BICF2S2343264           | 40412922 | A | 0.25 | 0.1429 | C |
| 18 | BICF2G630697082         | 40434507 | A | 0    | 0      | G |
| 18 | BICF2G630697071         | 40446515 | A | 0.25 | 0.4    | G |
| 18 | BICF2G630697052         | 40457344 | A | 0    | 0      | C |
| 18 | BICF2G630696932         | 40472809 | A | 0.25 | 0.3571 | G |
| 18 | BICF2S23621158          | 40523485 | A | 0    | 0      | G |
| 18 | BICF2S23054738          | 40527174 | G | 0    | 0      | A |
| 18 | BICF2G630696836         | 40545943 | A | 0    | 0      | G |
| 18 | BICF2P1114545           | 40557809 | G | 0    | 0      | A |
| 18 | BICF2G630696812         | 40563379 | A | 0.25 | 0.3571 | G |
| 18 | BICF2G630696804         | 40569076 | G | 0    | 0      | A |
| 18 | BICF2P1072979           | 40574898 | A | 0.25 | 0.1429 | G |
| 18 | BICF2P411743            | 40584271 | G | 0.5  | 0.5    | A |

|    |                         |          |   |      |         |   |
|----|-------------------------|----------|---|------|---------|---|
| 18 | BICF2P1214404           | 40626281 | G | 0    | 0       | C |
| 18 | TIGRP2P250131_rs8577010 | 40630359 | A | 0.5  | 0.5     | G |
| 18 | TIGRP2P250136_rs8627479 | 40642919 | A | 0    | 0       | C |
| 18 | TIGRP2P250148_rs8796250 | 40659547 | G | 1    | 1       | A |
| 18 | BICF2S23426             | 40671086 | A | 1    | 1       | T |
| 18 | BICF2P491377            | 40678953 | A | 0    | 0       | G |
| 18 | BICF2S23411774          | 40691805 | C | 0.25 | 0.1429  | A |
| 18 | BICF2P103218            | 40709407 | G | 0.25 | 0.1429  | A |
| 18 | BICF2P448752            | 40713459 | C | 0.25 | 0.1429  | A |
| 18 | BICF2S23233074          | 40746643 | A | 0.25 | 0.08333 | C |
| 18 | BICF2P303228            | 40763207 | A | 0.5  | 0.5     | G |
| 18 | BICF2P784143            | 40769884 | G | 0.75 | 0.6429  | A |
| 18 | TIGRP2P250213_rs8396669 | 40787418 | A | 0.25 | 0.3571  | C |
| 18 | TIGRP2P250222_rs8605980 | 40801001 | C | 0.5  | 0.5     | A |
| 18 | BICF2G630696773         | 40811867 | G | 1    | 1       | A |
| 18 | BICF2G630696768         | 40814175 | A | 0.5  | 0.5     | G |
| 18 | BICF2G630696763         | 40836771 | A | 0    | 0       | G |
| 18 | BICF2P490774            | 40848526 | A | 0    | 0       | G |
| 18 | BICF2G630696749         | 40863225 | G | 0.5  | 0.5     | C |
| 18 | TIGRP2P250228_rs8703385 | 40874214 | A | 0    | 0       | C |
| 18 | BICF2G630696733         | 40899671 | G | 0.75 | 0.6429  | A |
| 18 | BICF2G630696727         | 40909457 | G | 0    | 0       | C |
| 18 | BICF2G630696721         | 40925262 | A | 0.75 | 0.6429  | T |
| 18 | BICF2G630696713         | 40932556 | A | NA   | NA      | G |
| 18 | BICF2P230420            | 40948346 | A | 0    | 0.3571  | G |
| 18 | BICF2G630696696         | 40952324 | G | 0.25 | 0.3571  | C |
| 18 | BICF2G630696686         | 40964730 | A | 0    | 0       | G |
| 18 | BICF2G630696670         | 40975057 | A | 0    | 0       | G |
| 18 | TIGRP2P250251_rs9185704 | 41000047 | A | 0    | 0       | G |
| 18 | BICF2P233268            | 41028517 | G | 0.5  | 0.5     | A |
| 18 | TIGRP2P250300_rs9104331 | 41032440 | A | 0    | 0       | G |
| 18 | BICF2G630696581         | 41047574 | T | 0.25 | 0.3571  | A |
| 18 | BICF2P691661            | 41058008 | A | 0    | 0.1     | G |
| 18 | BICF2G630696551         | 41071428 | G | 1    | 1       | A |
| 18 | BICF2G630696528         | 41078222 | A | 0.75 | 0.6429  | G |
| 18 | BICF2G630696502         | 41101453 | G | 1    | 1       | A |
| 18 | BICF2G630696489         | 41105400 | G | 0    | 0       | A |
| 18 | TIGRP2P250341_rs8799780 | 41122422 | A | 1    | 1       | C |
| 18 | BICF2G630696451         | 41133195 | G | 0.75 | 0.6429  | A |
| 18 | BICF2G630696436         | 41144508 | G | 0    | 0       | A |
| 18 | BICF2G630696433         | 41151978 | G | 0    | 0       | A |
| 18 | BICF2G630696418         | 41159505 | C | 1    | 1       | A |
| 18 | BICF2G630696402         | 41173767 | G | 0.25 | 0.1429  | A |
| 18 | BICF2G630696390         | 41181275 | G | 0.25 | 0.1429  | A |
| 18 | BICF2G630696388         | 41181905 | A | 0.25 | 0.1429  | C |
| 18 | BICF2G630696377         | 41193081 | A | 0.5  | 0.5     | G |
| 18 | BICF2G630696361         | 41206125 | G | 0.5  | 0.5     | A |

|    |                         |          |   |      |        |   |
|----|-------------------------|----------|---|------|--------|---|
| 18 | BICF2G630696348         | 41216830 | G | 1    | 1      | A |
| 18 | BICF2G630696292         | 41247719 | 0 | 0    | 0      | G |
| 18 | BICF2G630696281         | 41252629 | A | 0    | 0      | G |
| 18 | BICF2G630696253         | 41271019 | A | 0.75 | 0.8571 | G |
| 18 | BICF2G630696252         | 41283073 | G | 0    | 0      | A |
| 18 | BICF2S22931351          | 41287372 | A | 0.25 | 0.1429 | T |
| 18 | BICF2S23014858          | 41296886 | A | 0    | 0      | G |
| 18 | BICF2G630696184         | 41312588 | A | 0.5  | 0.5    | G |
| 18 | BICF2G630696168         | 41320466 | G | 0.5  | 0.5    | A |
| 18 | BICF2G630696151         | 41338680 | G | 1    | 1      | A |
| 18 | BICF2G630696137         | 41348476 | G | 1    | 1      | A |
| 18 | BICF2G630696130         | 41357774 | G | 1    | 1      | A |
| 18 | BICF2G630696110         | 41365977 | G | 0.5  | 0.5    | A |
| 18 | BICF2G630696084         | 41380603 | G | 0.5  | 0.5    | A |
| 18 | TIGRP2P250379_rs9149209 | 41389511 | A | 0.5  | 0.5    | G |
| 18 | BICF2G630696076         | 41394437 | A | 0    | 0      | G |
| 18 | BICF2P386272            | 41400342 | 0 | 0    | 0      | C |
| 18 | TIGRP2P250380_rs8976538 | 41416245 | A | 0.5  | 0.5    | G |
| 18 | BICF2G630696051         | 41427750 | G | 0    | 0      | A |
| 18 | BICF2G630696018         | 41434724 | A | 0    | 0      | G |
| 18 | BICF2G630695990         | 41449219 | G | 0.5  | 0.5    | A |
| 18 | BICF2G630695980         | 41461174 | A | 0.25 | 0.1429 | G |
| 18 | BICF2P582425            | 41476047 | G | 0.5  | 0.5    | A |
| 18 | BICF2G630695957         | 41481075 | G | 0    | 0      | A |
| 18 | BICF2G630695949         | 41492165 | A | 0    | 0      | G |
| 18 | BICF2G630695941         | 41511048 | A | 0.75 | 0.8571 | G |
| 18 | TIGRP2P250400_rs8862860 | 41521996 | A | 0.5  | 0.5    | G |
| 18 | TIGRP2P250403_rs8730032 | 41535535 | 0 | 0    | 0      | G |
| 18 | BICF2G630695926         | 41543868 | A | 0.25 | 0.3571 | C |
| 18 | BICF2G630695906         | 41553640 | G | 0    | 0      | A |
| 18 | BICF2P841215            | 41567746 | A | 0.5  | 0.5    | G |
| 18 | BICF2P1214601           | 41572833 | A | 0.5  | 0.5    | G |
| 18 | BICF2P777670            | 41575707 | A | 0.5  | 0.5    | G |
| 18 | BICF2G630695899         | 41576729 | A | 0.25 | 0.1429 | T |
| 18 | BICF2G630695891         | 41594362 | G | 1    | 1      | A |
| 18 | BICF2S23234890          | 41603329 | C | 0.25 | 0.3571 | A |
| 18 | BICF2G630695881         | 41615370 | G | 0    | 0      | A |
| 18 | BICF2G630695874         | 41619348 | G | 0.25 | 0.3571 | A |
| 18 | BICF2S23424762          | 41641245 | G | 0    | 0      | A |
| 18 | BICF2P1240816           | 41645821 | G | 0.25 | 0.3571 | A |
| 18 | BICF2G630695848         | 41654599 | G | 0.25 | 0.3571 | A |
| 18 | BICF2G630695825         | 41674798 | A | 0.25 | 0.3571 | G |
| 18 | BICF2G630695821         | 41676694 | A | 0.25 | 0.3571 | G |
| 18 | BICF2G630695786         | 41687622 | C | 0.75 | 0.8571 | G |
| 18 | BICF2G630695762         | 41707319 | A | 0    | 0      | G |
| 18 | BICF2P38745             | 41715787 | A | 1    | 1      | G |
| 18 | BICF2G630695751         | 41724372 | G | 0.75 | 0.6429 | A |

|    |                         |          |   |      |        |   |
|----|-------------------------|----------|---|------|--------|---|
| 18 | BICF2G630695744         | 41739046 | A | 0.25 | 0.3571 | G |
| 18 | BICF2G630695736         | 41753321 | G | 0    | 0      | A |
| 18 | TIGRP2P250447_rs8591736 | 41766536 | G | 0    | 0      | A |
| 18 | TIGRP2P250449_rs8616836 | 41769854 | G | 1    | 1      | A |
| 18 | BICF2P1092496           | 41784881 | G | 0.5  | 0.5    | A |
| 18 | BICF2P1462237           | 41797312 | C | 0.5  | 0.5    | A |
| 18 | BICF2G630695711         | 41802614 | G | 0.5  | 0.5    | A |
| 18 | BICF2S22910565          | 41828021 | 0 | 0    | 0      | A |
| 18 | BICF2G630695693         | 41837601 | A | 0    | 0      | G |
| 18 | BICF2P1013312           | 41868316 | G | 0    | 0      | C |
| 18 | BICF2P1273137           | 41872969 | A | 0    | 0      | G |
| 18 | BICF2G630695676         | 41892670 | A | 1    | 1      | G |
| 18 | BICF2S23331381          | 41896479 | A | 0    | 0      | G |
| 18 | TIGRP2P250493_rs9062302 | 41908643 | A | 0    | 0      | G |
| 18 | BICF2G630695657         | 41925036 | A | 0.25 | 0.3571 | G |
| 18 | BICF2G630695634         | 41931952 | A | 0    | 0      | G |
| 18 | BICF2P2143              | 41941374 | A | 0    | 0      | G |
| 18 | BICF2S23160448          | 41960335 | G | 0    | 0      | A |
| 18 | BICF2S23546577          | 41966547 | A | 0    | 0      | G |
| 18 | BICF2P1510574           | 41977422 | G | 0.5  | 0.5    | A |
| 18 | BICF2P458942            | 41981651 | A | 0    | 0      | G |
| 18 | BICF2P248687            | 41988486 | G | 0.5  | 0.5    | A |
| 18 | BICF2G630695620         | 41989577 | A | 0    | 0      | G |
| 18 | BICF2G630695612         | 41998810 | G | 0    | 0      | A |
| 18 | BICF2G630695588         | 42014315 | C | 0    | 0      | A |
| 18 | BICF2G630695572         | 42030591 | A | 0.75 | 0.8571 | G |
| 18 | BICF2G630695568         | 42033116 | A | 1    | 1      | C |
| 18 | BICF2G630695553         | 42049071 | A | 0    | 0      | G |
| 18 | BICF2G630695547         | 42056545 | G | 0.75 | 0.8571 | A |
| 18 | BICF2G630695509         | 42068668 | G | 0    | 0      | A |
| 18 | BICF2P205747            | 42103458 | 0 | 0    | 0      | A |
| 18 | TIGRP2P250528_rs8606860 | 42118377 | G | 0.25 | 0.3571 | A |
| 18 | BICF2G630695466         | 42124538 | A | 0    | 0      | C |
| 18 | BICF2G630695465         | 42124769 | G | 0.5  | 0.5    | A |
| 18 | BICF2G630695460         | 42130573 | G | 0.5  | 0.5    | A |
| 18 | BICF2G630695445         | 42146392 | G | 0.75 | 0.8571 | A |
| 18 | BICF2G630695444         | 42147526 | A | 0.75 | 0.8571 | G |
| 18 | BICF2P1444102           | 42153235 | A | 0.25 | 0.3571 | G |
| 18 | BICF2G630695429         | 42159970 | A | 0.75 | 0.8571 | G |
| 18 | BICF2G630695427         | 42188268 | T | 0.75 | 0.8571 | A |
| 18 | BICF2G630695425         | 42204796 | A | 0.25 | 0.1429 | G |
| 18 | BICF2G630695417         | 42208323 | A | 0.25 | 0.1429 | G |
| 18 | BICF2G630695405         | 42218996 | C | 0.75 | 0.8571 | A |
| 18 | TIGRP2P250545_rs8818704 | 42233885 | G | 0    | 0      | A |
| 18 | BICF2P471385            | 42241759 | G | 0.25 | 0.1429 | A |
| 18 | TIGRP2P250552_rs8817916 | 42260656 | A | 0.25 | 0.3571 | T |
| 18 | BICF2P624780            | 42263426 | A | 0.75 | 0.8571 | G |



|    |                         |          |   |      |        |   |
|----|-------------------------|----------|---|------|--------|---|
| 18 | BICF2G630695392         | 42274797 | A | 0.75 | 0.8571 | G |
| 18 | BICF2G630695379         | 42307477 | G | 0    | 0      | A |
| 18 | BICF2G630695340         | 42359066 | A | 0    | 0      | G |
| 18 | BICF2G630695337         | 42367572 | C | 0    | 0      | G |
| 18 | BICF2S22952325          | 42402672 | A | 0.5  | 0.5    | G |
| 18 | BICF2P753279            | 42420829 | C | 0.75 | 0.8571 | A |
| 18 | BICF2G630695310         | 42460948 | A | 0.5  | 0.5    | G |
| 18 | BICF2G630695303         | 42476805 | A | 0    | 0      | G |
| 18 | BICF2G630695284         | 42486691 | A | 0.75 | 0.8571 | G |
| 18 | BICF2G630695268         | 42500445 | G | 0    | 0      | C |
| 18 | BICF2G630695257         | 42518097 | C | 0    | 0      | A |
| 18 | TIGRP2P250700_rs8729021 | 42529438 | A | 0.5  | 0.5    | G |
| 18 | TIGRP2P250705_rs8943188 | 42539460 | G | 0.75 | 0.6429 | A |
| 18 | BICF2P1455496           | 42554745 | A | 0    | 0      | G |
| 18 | BICF2P1206441           | 42572453 | A | 0.25 | 0.3571 | G |
| 18 | BICF2P1206438           | 42573357 | A | 0    | 0      | C |
| 18 | TIGRP2P250727_rs8911967 | 42587080 | G | 0.75 | 0.8571 | A |
| 18 | TIGRP2P250734_rs8893653 | 42597244 | G | 0    | 0      | A |
| 18 | BICF2G630695242         | 42615172 | A | 0    | 0      | G |
| 18 | BICF2S23433164          | 42621571 | A | 0.25 | 0.3571 | C |
| 18 | BICF2P630317            | 42636810 | G | 0    | 0      | A |
| 18 | BICF2S23622441          | 42654634 | C | 0    | 0      | A |
| 18 | BICF2G630695166         | 42679231 | G | 0.25 | 0.1667 | A |
| 18 | BICF2G630695136         | 42689325 | A | 0    | 0      | G |
| 18 | BICF2P515232            | 42710558 | A | 0    | 0      | C |
| 18 | TIGRP2P250881_rs9126200 | 42723644 | A | 0    | 0.1429 | C |
| 18 | BICF2G630695126         | 42744197 | G | 0    | 0      | C |
| 18 | BICF2S23116176          | 42764307 | A | 0.25 | 0.3571 | G |
| 18 | BICF2S22962866          | 42770061 | G | 0.25 | 0.3571 | A |
| 18 | BICF2P504302            | 42791022 | A | 0.75 | 0.6429 | G |
| 18 | BICF2P832865            | 42803591 | C | 0    | 0      | A |
| 18 | BICF2P768577            | 42820551 | 0 | 0    | 0      | G |
| 18 | BICF2S23121324          | 42826265 | A | 0    | 0      | G |
| 18 | BICF2S23622503          | 42842081 | A | 0    | 0      | G |
| 18 | BICF2P1189168           | 42862135 | G | 0.75 | 0.8571 | A |
| 18 | BICF2P1014768           | 42873248 | A | 0.5  | 0.5    | G |
| 18 | BICF2S23315405          | 42886222 | A | 0.5  | 0.5    | C |
| 18 | BICF2P673241            | 42897855 | A | 0.5  | 0.5    | G |
| 18 | BICF2P684942            | 42910374 | G | 0    | 0      | A |
| 18 | BICF2P684940            | 42910685 | A | 0    | 0      | G |
| 18 | BICF2P319771            | 42921869 | A | 0.5  | 0.5    | G |
| 18 | BICF2P428334            | 42932661 | A | 0    | 0      | G |
| 18 | TIGRP2P251025_rs9173309 | 42944759 | G | 0.5  | 0.5    | A |
| 18 | TIGRP2P251041_rs8945145 | 42955743 | G | 0    | 0      | A |
| 18 | TIGRP2P251062_rs8628448 | 42964610 | A | 0    | 0      | G |
| 18 | TIGRP2P251070_rs8502734 | 42978144 | A | 1    | 1      | G |
| 18 | BICF2G630695031         | 43034407 | A | 0    | 0      | G |

|    |                         |          |   |      |        |   |
|----|-------------------------|----------|---|------|--------|---|
| 18 | BICF2G630695015         | 43051715 | A | 0.25 | 0.1429 | G |
| 18 | BICF2G630695009         | 43057174 | G | 0.25 | 0.1429 | A |
| 18 | TIGRP2P251210_rs8751669 | 43069044 | A | 0    | 0      | G |
| 18 | BICF2G630694973         | 43092237 | G | 0    | 0      | A |
| 18 | BICF2G630694970         | 43108672 | A | 0    | 0      | C |
| 18 | BICF2G630694944         | 43118394 | A | 0.5  | 0.5    | G |
| 18 | BICF2P886596            | 43121309 | A | 0.25 | 0.1429 | G |
| 18 | BICF2G630694930         | 43125279 | A | 0.5  | 0.5    | G |
| 18 | BICF2G630694909         | 43139653 | G | 0.5  | 0.5    | A |
| 18 | BICF2S23238038          | 43149671 | A | 0.5  | 0.6    | G |
| 18 | BICF2G630694839         | 43166248 | A | 0.25 | 0.3571 | G |
| 18 | BICF2G630694813         | 43174857 | G | 0.25 | 0.3571 | A |
| 18 | BICF2G630694785         | 43185647 | A | 0    | 0      | G |
| 18 | BICF2G630694770         | 43197070 | A | 0.25 | 0.1429 | G |
| 18 | BICF2G630694756         | 43208169 | A | 0    | 0      | G |
| 18 | BICF2G630694755         | 43208463 | A | 0    | 0      | G |
| 18 | BICF2G630694741         | 43214106 | G | 0.25 | 0.3571 | A |
| 18 | BICF2P942426            | 43218637 | A | 0    | 0      | G |
| 18 | BICF2G630694713         | 43230118 | G | 0.25 | 0.1429 | A |
| 18 | TIGRP2P251328_rs8871246 | 43240614 | G | 0.75 | 0.6429 | A |
| 18 | BICF2G630694670         | 43251729 | G | 0    | 0      | A |
| 18 | BICF2P375039            | 43267577 | A | 0    | 0      | G |
| 18 | BICF2G630694550         | 43281451 | A | 0    | 0      | G |
| 18 | BICF2S23035663          | 43288031 | A | 0.75 | 0.6429 | C |
| 18 | BICF2P411525            | 43300976 | A | 0    | 0      | G |
| 18 | BICF2G630694491         | 43309685 | A | 0.25 | 0.1429 | G |
| 18 | BICF2G630694455         | 43337971 | G | 0.75 | 0.6429 | A |
| 18 | BICF2G630694431         | 43343527 | A | 0.75 | 0.6429 | G |
| 18 | BICF2P1241333           | 43380259 | A | 0    | 0.125  | G |
| 18 | TIGRP2P251482_rs8998054 | 43399636 | G | 0    | 0      | A |
| 18 | BICF2G630694305         | 43404130 | A | 0    | 0      | G |
| 18 | BICF2P73576             | 43418035 | G | 0    | 0      | A |
| 18 | TIGRP2P251508_rs9222860 | 43428826 | A | 0    | 0      | G |
| 18 | TIGRP2P251510_rs9159031 | 43446062 | 0 | 0    | 0      | G |
| 18 | BICF2P964087            | 43468357 | A | 0    | 0      | T |
| 18 | TIGRP2P251385_rs9042673 | 43475052 | G | 1    | 0.6429 | A |
| 18 | TIGRP2P251535_rs9014924 | 43485289 | 0 | 0    | 0      | C |
| 18 | BICF2G630694151         | 43541995 | G | 0.5  | 0.5    | A |
| 18 | BICF2G630693917         | 43702372 | A | 0.5  | 0.5    | C |
| 18 | BICF2G630693882         | 43722930 | A | 0    | 0      | G |
| 18 | BICF2G630693829         | 43759458 | C | 0    | 0      | A |
| 18 | BICF2G630693604         | 43853460 | A | 0    | 0      | G |
| 18 | BICF2G630693570         | 43861061 | A | 0    | 0      | G |
| 18 | BICF2G630693495         | 43872955 | G | 0    | 0      | A |
| 18 | BICF2S23549984          | 43896673 | A | 0    | 0      | G |
| 18 | BICF2S23042251          | 43914700 | A | 0    | 0      | C |
| 18 | BICF2G630693404         | 43925510 | C | 0    | 0      | G |

|    |                         |          |   |      |        |   |
|----|-------------------------|----------|---|------|--------|---|
| 18 | BICF2P31422             | 43974331 | A | 0    | 0      | G |
| 18 | BICF2G630693344         | 44041219 | G | 0    | 0      | A |
| 18 | BICF2P1031375           | 44046750 | 0 | 0    | 0      | G |
| 18 | BICF2P744446            | 44063145 | A | 0    | 0      | G |
| 18 | BICF2G630693328         | 44076809 | G | 0    | 0      | A |
| 18 | BICF2G630693322         | 44083207 | G | 0    | 0      | A |
| 18 | BICF2P326020            | 44095787 | A | 0    | 0      | G |
| 18 | BICF2G630693281         | 44114197 | A | 0    | 0      | G |
| 18 | BICF2G630693271         | 44125518 | A | 0    | 0      | G |
| 18 | BICF2G630693201         | 44163809 | C | 0    | 0      | A |
| 18 | BICF2G630693165         | 44207461 | 0 | 0    | 0      | G |
| 18 | BICF2S23147328          | 44207616 | A | 0    | 0      | G |
| 18 | BICF2G630693161         | 44259652 | 0 | 0    | 0      | T |
| 18 | BICF2G630693151         | 44273840 | 0 | 0    | 0      | G |
| 18 | TIGRP2P253020_rs8488597 | 44299741 | 0 | 0    | 0      | C |
| 18 | BICF2P1003487           | 44370215 | 0 | 0    | 0      | G |
| 18 | BICF2S23618125          | 44408658 | G | 0    | 0      | A |
| 18 | BICF2S23713612          | 44422737 | G | 0    | 0      | A |
| 18 | BICF2G630693042         | 44430612 | 0 | 0    | 0      | A |
| 18 | BICF2P1219811           | 44457549 | G | 0    | 0      | A |
| 18 | BICF2G630693027         | 44471296 | C | 0    | 0      | A |
| 18 | BICF2G630692958         | 44516666 | G | 0    | 0      | A |
| 18 | BICF2G630692875         | 44550745 | A | 0    | 0      | T |
| 18 | BICF2P374289            | 44562949 | A | 0    | 0      | G |
| 18 | BICF2P585170            | 44574052 | A | 0    | 0      | G |
| 18 | BICF2P1016667           | 44594348 | G | 0    | 0      | A |
| 18 | BICF2P334567            | 44605130 | A | 0    | 0      | G |
| 18 | BICF2P334566            | 44605262 | A | 0    | 0      | G |
| 18 | BICF2P391529            | 44611956 | A | 0    | 0      | G |
| 18 | BICF2G630692870         | 44622490 | A | 0    | 0      | G |
| 18 | BICF2G630692863         | 44634438 | A | 0    | 0      | G |
| 18 | BICF2G630692851         | 44643204 | 0 | 0    | 0      | G |
| 18 | BICF2P478109            | 44661921 | G | 0    | 0      | A |
| 18 | TIGRP2P253229_rs9004680 | 44668860 | G | 0    | 0      | A |
| 18 | TIGRP2P253231_rs9061539 | 44680744 | A | 0    | 0      | G |
| 18 | BICF2G630692839         | 44703207 | A | 0.25 | 0.3571 | G |
| 18 | BICF2G630692828         | 44712472 | C | 1    | 1      | A |
| 18 | BICF2G630692817         | 44726721 | C | 0.25 | 0.1429 | A |
| 18 | BICF2G630692809         | 44745215 | G | 0    | 0      | A |
| 18 | BICF2G630692806         | 44748065 | G | 0.5  | 0.5    | A |
| 18 | BICF2G630692803         | 44761357 | G | 1    | 1      | A |
| 18 | BICF2G630692788         | 44775710 | A | 0    | 0      | G |
| 18 | BICF2G630692782         | 44788850 | A | 1    | 1      | G |
| 18 | BICF2P63114             | 44793126 | 0 | 0    | 0      | C |
| 18 | BICF2G630692768         | 44804108 | G | 0    | 0      | A |
| 18 | BICF2G630692742         | 44823835 | A | 0.5  | 0.5    | G |
| 18 | BICF2S23353239          | 44826612 | A | 0.5  | 0.5    | G |

|    |                         |          |   |      |         |   |
|----|-------------------------|----------|---|------|---------|---|
| 18 | BICF2G630692694         | 44845692 | C | 0    | 0       | A |
| 18 | BICF2G630692668         | 44854882 | A | 0    | 0       | G |
| 18 | BICF2P1126793           | 44870586 | G | 0    | 0       | A |
| 18 | BICF2G630692641         | 44877505 | A | 0    | 0       | G |
| 18 | BICF2G630692633         | 44900110 | C | 0.5  | 0.5     | A |
| 18 | BICF2G630692613         | 44908933 | A | 0    | 0       | G |
| 18 | BICF2G630692594         | 44924757 | A | 0    | 0       | G |
| 18 | BICF2G630692584         | 44931220 | A | 0.25 | 0.3571  | G |
| 18 | BICF2S23228600          | 44949073 | G | 0.25 | 0.1429  | A |
| 18 | BICF2G630692558         | 44971437 | G | 0.25 | 0.1429  | A |
| 18 | BICF2G630692554         | 44977872 | G | 0.25 | 0.1429  | A |
| 18 | BICF2G630692550         | 44995731 | A | 0.25 | 0.1429  | G |
| 18 | TIGRP2P253252_rs8714980 | 45004342 | A | 0.25 | 0.08333 | G |
| 18 | TIGRP2P253256_rs8716641 | 45020833 | G | 1    | 1       | A |
| 18 | BICF2S23743150          | 45027119 | A | 0    | 0       | G |
| 18 | BICF2P553803            | 45036689 | A | 0    | 0       | G |
| 18 | BICF2P276468            | 45047318 | G | 1    | 1       | A |
| 18 | BICF2G630692519         | 45059778 | G | 0    | 0       | A |
| 18 | BICF2G630692512         | 45075126 | G | 0    | 0       | A |
| 18 | BICF2G630692509         | 45082152 | A | 1    | 1       | G |
| 18 | BICF2G630692490         | 45096897 | C | 0    | 0       | G |
| 18 | BICF2G630692486         | 45102895 | C | 0    | 0       | G |
| 18 | BICF2G630692480         | 45110999 | A | 0    | 0       | G |
| 18 | TIGRP2P253282_rs9247737 | 45111492 | C | 0    | 0       | A |
| 18 | BICF2G630692478         | 45116593 | A | 0    | 0       | G |
| 18 | BICF2S23634354          | 45150534 | 0 | 0    | 0       | C |
| 18 | TIGRP2P253289_rs8824546 | 45166008 | 0 | 0    | 0       | C |
| 18 | BICF2S23440958          | 45194204 | G | 0    | 0       | A |
| 18 | BICF2P43165             | 45203778 | C | 0    | 0       | A |
| 18 | BICF2P394789            | 45209080 | A | 0    | 0       | C |
| 18 | BICF2P1333536           | 45220393 | G | 0    | 0       | A |
| 18 | BICF2P765522            | 45233671 | 0 | 0    | 0       | G |
| 18 | BICF2S23246449          | 45241933 | G | 0    | 0       | A |
| 18 | BICF2P517742            | 45255987 | 0 | 0    | 0       | G |
| 18 | BICF2P935846            | 45266899 | C | 0    | 0       | A |
| 18 | BICF2P937377            | 45282001 | 0 | 0    | 0       | C |
| 18 | BICF2S23612385          | 45291465 | A | 0    | 0       | G |
| 18 | BICF2G630692451         | 45300324 | G | 0.25 | 0.07143 | A |
| 18 | BICF2P165059            | 45311871 | 0 | 0    | 0       | C |
| 18 | BICF2G630692432         | 45330424 | A | 0.5  | 0.5     | G |
| 18 | TIGRP2P253315_rs8581068 | 45334726 | A | 0.5  | 0.5     | C |
| 18 | BICF2G630692417         | 45344986 | A | 0    | 0       | G |
| 18 | BICF2P1118745           | 45350493 | G | 0.5  | 0.5     | A |
| 18 | BICF2P1048918           | 45358214 | G | 0.5  | 0.5     | A |
| 18 | TIGRP2P253320_rs8562804 | 45370799 | 0 | 0    | 0       | G |
| 18 | BICF2P85639             | 45381701 | A | 0    | 0       | G |
| 18 | TIGRP2P253334_rs9198175 | 45393146 | C | 0.25 | 0.07143 | A |

|    |                         |          |   |      |         |   |
|----|-------------------------|----------|---|------|---------|---|
| 18 | BICF2S2414182           | 45411184 | G | 0.25 | 0.4286  | C |
| 18 | BICF2S2358511           | 45420891 | G | 0.5  | 0.5     | A |
| 18 | BICF2P495527            | 45432220 | A | 0    | 0       | G |
| 18 | BICF2G630692383         | 45435789 | G | 0    | 0       | A |
| 18 | BICF2P400939            | 45436486 | C | 0    | 0       | A |
| 18 | BICF2G630692376         | 45441054 | G | 0.25 | 0.07143 | A |
| 18 | BICF2G630692373         | 45451162 | A | 0.75 | 0.9286  | G |
| 18 | BICF2G630692365         | 45465353 | A | 0    | 0       | G |
| 18 | BICF2G630692342         | 45479633 | A | 0.25 | 0.07143 | G |
| 18 | BICF2G630692330         | 45491753 | A | 0    | 0       | G |
| 18 | BICF2G630692322         | 45495307 | G | 0    | 0       | A |
| 18 | BICF2G630692314         | 45513333 | C | 0    | 0       | A |
| 18 | BICF2G630692312         | 45550004 | A | 0.25 | 0.07143 | G |
| 18 | BICF2P112182            | 45580298 | 0 | 0    | 0       | A |
| 18 | BICF2G630692302         | 45593585 | A | 0    | 0       | G |
| 18 | BICF2G630692298         | 45608699 | A | 0.75 | 0.9286  | G |
| 18 | BICF2G630692293         | 45613367 | C | 1    | 1       | A |
| 18 | BICF2G630692284         | 45625140 | C | 0.75 | 1       | A |
| 18 | BICF2P517207            | 45644871 | G | 0    | 0       | A |
| 18 | BICF2S23546601          | 45657098 | 0 | 0    | 0       | A |
| 18 | BICF2G630692249         | 45669370 | A | 0.25 | 0.4286  | G |
| 18 | BICF2G630692241         | 45675663 | A | 0.75 | 0.9286  | G |
| 18 | BICF2G630692229         | 45689162 | G | 0.25 | 0.07143 | A |
| 18 | BICF2G630692220         | 45695022 | A | 0.5  | 0.5     | G |
| 18 | BICF2P245560            | 45703535 | 0 | 0    | 0       | A |
| 18 | G1029f22S162            | 45732007 | 0 | 0    | 0       | C |
| 18 | BICF2P396050            | 45752230 | A | 1    | 1       | G |
| 18 | TIGRP2P253365_rs8919470 | 45766779 | G | 1    | 1       | A |
| 18 | BICF2S22932767          | 45791959 | 0 | 0    | 0       | G |
| 18 | BICF2P149499            | 45815018 | 0 | 0    | 0       | G |
| 18 | BICF2G630692212         | 45829086 | C | 0.25 | 0.4286  | A |
| 18 | BICF2G630692204         | 45839100 | A | 0    | 0       | G |
| 18 | BICF2P98652             | 45852902 | A | 0.25 | 0.4286  | G |
| 18 | BICF2G630692195         | 45854676 | G | 0.25 | 0.4286  | A |
| 18 | BICF2S23123837          | 45856238 | G | 0.25 | 0.4286  | A |
| 18 | BICF2G630692189         | 45863268 | G | 0    | 0       | A |
| 18 | BICF2G630692181         | 45874277 | G | 0    | 0       | A |
| 18 | BICF2P653685            | 45891711 | G | 0.25 | 0.4286  | A |
| 18 | BICF2P564292            | 45904123 | A | 0    | 0.4286  | G |
| 18 | TIGRP2P253382_rs8904710 | 45912753 | G | 0.25 | 0.4286  | A |
| 18 | BICF2S22954261          | 45919611 | G | 0.25 | 0.4286  | A |
| 18 | BICF2G630692169         | 45938540 | A | 0    | 0       | C |
| 18 | BICF2P900668            | 45946105 | 0 | 0    | 0       | A |
| 18 | BICF2P1410813           | 46003659 | A | 0    | 0       | G |
| 18 | BICF2G630692167         | 46016942 | A | 0.5  | 0.5833  | G |
| 18 | BICF2S23015536          | 46038034 | G | 0    | 0       | C |
| 18 | BICF2P1190747           | 46073531 | 0 | 0    | 0       | A |

|    |                         |          |   |      |         |   |
|----|-------------------------|----------|---|------|---------|---|
| 18 | BICF2P1366082           | 46095372 | 0 | 0    | 0       | G |
| 18 | BICF2S23614877          | 46108515 | G | 0    | 0       | A |
| 18 | TIGRP2P253389_rs8976010 | 46131406 | A | 0.75 | 0.5714  | G |
| 18 | BICF2S23142336          | 46147287 | A | 0.75 | 0.5714  | G |
| 18 | TIGRP2P253399_rs8858514 | 46152380 | A | 0    | 0       | G |
| 18 | BICF2P898024            | 46162347 | G | 0    | 0       | A |
| 18 | BICF2S22947             | 46182671 | A | 0.25 | 0.07143 | G |
| 18 | BICF2P1225153           | 46190387 | A | 0.25 | 0.07143 | G |
| 18 | BICF2P443707            | 46201182 | G | 0    | 0       | A |
| 18 | BICF2P1056403           | 46210180 | G | 0.5  | 0.5     | A |
| 18 | BICF2P631380            | 46228220 | A | 0    | 0       | G |
| 18 | BICF2P678642            | 46235806 | G | 0.75 | 0.9286  | A |
| 18 | BICF2P951900            | 46246004 | G | 0.25 | 0.4286  | A |
| 18 | BICF2P457117            | 46268361 | A | 0.5  | 0.5     | G |
| 18 | BICF2P394293            | 46285924 | T | 0.25 | 0.07143 | A |
| 18 | BICF2P99184             | 46289153 | C | 0.25 | 0.07143 | A |
| 18 | BICF2P788763            | 46319651 | G | 0.5  | 0.5     | A |
| 18 | BICF2S22922900          | 46330046 | G | 0.5  | 0.5     | A |
| 18 | TIGRP2P253434_rs8614841 | 46353989 | C | 0    | 0       | A |
| 18 | TIGRP2P253435_rs8724254 | 46359537 | 0 | 0    | 0       | A |
| 18 | BICF2P963298            | 46410158 | 0 | 0    | 0       | A |
| 18 | BICF2P187190            | 46421908 | 0 | 0    | 0       | G |
| 18 | BICF2P913132            | 46426080 | 0 | 0    | 0       | G |
| 18 | BICF2P1088513           | 46447255 | 0 | 0    | 0       | T |
| 18 | BICF2P1198522           | 46461715 | G | 0.5  | 0.5     | A |
| 18 | TIGRP2P253438_rs8973691 | 46475822 | A | 0.5  | 0.5     | G |
| 18 | BICF2P785242            | 46492135 | 0 | 0    | 0       | A |
| 18 | BICF2P450105            | 46506953 | A | 0.25 | 0.4286  | C |
| 18 | BICF2P1329845           | 46525171 | 0 | 0    | 0       | C |
| 18 | TIGRP2P253444_rs8859144 | 46538167 | A | 0    | 0       | G |
| 18 | BICF2P857729            | 46544094 | A | 0.25 | 0.4286  | G |
| 18 | TIGRP2P253465_rs9223337 | 46552313 | A | 0.25 | 0.4286  | G |
| 18 | BICF2P1352408           | 46573140 | A | 0    | 0       | G |
| 18 | BICF2S23447515          | 46582710 | A | 0.25 | 0.4286  | G |
| 18 | BICF2P429857            | 46592024 | A | 1    | 1       | G |
| 18 | BICF2P442964            | 46603250 | C | 1    | 1       | A |
| 18 | BICF2P185414            | 46609321 | A | 0.25 | 0.07143 | G |
| 18 | BICF2P638617            | 46616892 | C | 0.25 | 0.4286  | A |
| 18 | BICF2P1105335           | 46622915 | G | 0.25 | 0.07143 | A |
| 18 | BICF2P553931            | 46639068 | A | 0.25 | 0.4286  | G |
| 18 | BICF2P974163            | 46646477 | A | 0.75 | 0.5714  | G |
| 18 | BICF2P328319            | 46664827 | G | 0.25 | 0.4286  | A |
| 18 | BICF2P519398            | 46677251 | G | 0.25 | 0.4286  | A |
| 18 | BICF2P803187            | 46679447 | A | 0.25 | 0.4286  | G |
| 18 | BICF2P925302            | 46695872 | C | 0.25 | 0.4167  | A |
| 18 | BICF2S23626895          | 46711134 | G | 0    | 0       | A |
| 18 | BICF2P950118            | 46721669 | G | 0    | 0       | A |

|    |                         |          |   |      |         |   |
|----|-------------------------|----------|---|------|---------|---|
| 18 | BICF2P1206617           | 46725430 | A | 0    | 0       | G |
| 18 | BICF2S23435965          | 46746330 | T | 0    | 0       | A |
| 18 | BICF2S22912595          | 46752427 | G | 0.5  | 0.5     | A |
| 18 | BICF2P186881            | 46764467 | A | 0.5  | 0.5     | G |
| 18 | BICF2P167287            | 46770674 | A | 0    | 0       | G |
| 18 | BICF2P125476            | 46797236 | 0 | 0    | 0       | C |
| 18 | BICF2P672461            | 46806889 | 0 | 0    | 0       | A |
| 18 | BICF2P102471            | 46817429 | G | 0.75 | 0.9286  | A |
| 18 | BICF2P386079            | 46828354 | 0 | 0    | 0       | C |
| 18 | BICF2P318590            | 46843497 | A | 0    | 0       | G |
| 18 | BICF2P1248881           | 46862468 | A | 0    | 0       | C |
| 18 | BICF2P1248878           | 46862942 | A | 0.75 | 0.5714  | G |
| 18 | BICF2P313459            | 46867655 | C | 0    | 0       | A |
| 18 | BICF2S23245528          | 46876733 | G | 0    | 0       | A |
| 18 | BICF2P282272            | 46887600 | C | 0    | 0       | A |
| 18 | BICF2P1201279           | 46899139 | G | 0.5  | 0.5     | A |
| 18 | BICF2S23743687          | 46918325 | A | 0    | 0       | C |
| 18 | BICF2P855798            | 46926586 | A | 0    | 0       | G |
| 18 | BICF2P1032722           | 46942092 | 0 | 0    | 0       | G |
| 18 | BICF2S23740193          | 46945387 | A | 0.25 | 0.07143 | G |
| 18 | BICF2P1211410           | 46957544 | 0 | 0    | 0       | G |
| 18 | BICF2P968066            | 46970692 | A | 0    | 0.4286  | G |
| 18 | BICF2P1221950           | 46978286 | A | 0    | 0       | G |
| 18 | BICF2P1180479           | 46981716 | A | 0.5  | 0.5     | G |
| 18 | BICF2P1170056           | 46990128 | G | 0.25 | 0.4286  | C |
| 18 | TIGRP2P253582_rs9100096 | 47006960 | 0 | 0    | 0       | C |
| 18 | TIGRP2P253587_rs8636382 | 47014404 | A | 1    | 1       | G |
| 18 | BICF2P893099            | 47044775 | A | 0    | 0       | G |
| 18 | BICF2P893105            | 47047156 | G | 0    | 0       | A |
| 18 | BICF2P1042161           | 47059587 | G | 1    | 1       | A |
| 18 | BICF2P1117848           | 47080868 | A | 0.75 | 0.9286  | G |
| 18 | BICF2P527868            | 47085551 | A | 0.75 | 0.9286  | G |
| 18 | BICF2P855874            | 47096058 | A | 0    | 0       | C |
| 18 | BICF2P470908            | 47115362 | A | 0.25 | 0.07143 | G |
| 18 | TIGRP2P253633_rs9054485 | 47116634 | A | 0.25 | 0.4286  | G |
| 18 | BICF2S22960769          | 47135523 | A | 0.25 | 0.07143 | G |
| 18 | BICF2S23140194          | 47138642 | A | 0.75 | 0.9286  | G |
| 18 | TIGRP2P253640_rs9146521 | 47148323 | C | 0    | 0       | A |
| 18 | BICF2P821221            | 47152051 | A | 0    | 0       | G |
| 18 | BICF2S23444594          | 47172709 | A | 0    | 0       | G |
| 18 | BICF2P1402700           | 47174440 | C | 0.25 | 0.07143 | A |
| 18 | BICF2P255483            | 47183352 | A | 0.5  | 0.5     | G |
| 18 | TIGRP2P253656_rs8786052 | 47195320 | A | 0    | 0       | G |
| 18 | BICF2P151279            | 47197430 | A | 0.75 | 0.9286  | C |
| 18 | TIGRP2P253664_rs8536323 | 47212956 | A | 0.25 | 0.4286  | G |
| 18 | BICF2P730953            | 47221057 | A | 0.25 | 0.4286  | G |
| 18 | TIGRP2P253685_rs9109292 | 47233491 | G | 0.5  | 0.5     | A |

|    |                         |          |   |      |         |   |
|----|-------------------------|----------|---|------|---------|---|
| 18 | BICF2G630692155         | 47246500 | A | 0.25 | 0.4167  | G |
| 18 | BICF2G630692144         | 47257623 | C | 0    | 0       | A |
| 18 | BICF2P1118374           | 47267314 | A | 0    | 0       | C |
| 18 | BICF2P1199406           | 47282286 | A | 0.75 | 0.5714  | C |
| 18 | BICF2P245158            | 47293963 | G | 0    | 0       | A |
| 18 | BICF2G630692113         | 47305044 | C | 1    | 1       | A |
| 18 | BICF2G630692109         | 47322102 | 0 | 0    | 0       | G |
| 18 | BICF2G630692098         | 47327747 | G | 0.25 | 0.07143 | A |
| 18 | BICF2G630692082         | 47344900 | A | 0.25 | 0.07143 | G |
| 18 | BICF2G630692072         | 47348838 | G | 0.25 | 0.07143 | A |
| 18 | TIGRP2P253716_rs8679834 | 47364238 | A | 0    | 0       | G |
| 18 | TIGRP2P253720_rs9031322 | 47370181 | A | 0.5  | 0.5     | G |
| 18 | BICF2P130091            | 47383771 | A | 0    | 0       | G |
| 18 | BICF2P3270              | 47401819 | A | 0.25 | 0.07143 | G |
| 18 | BICF2G630692042         | 47409485 | G | 0.25 | 0.2857  | A |
| 18 | BICF2P132740            | 47420800 | A | 0.75 | 0.7143  | G |
| 18 | BICF2G630692029         | 47428893 | A | 0.25 | 0.2857  | G |
| 18 | BICF2G630692009         | 47437696 | G | 0.25 | 0.2857  | A |
| 18 | BICF2S23647655          | 47459246 | A | 0.25 | 0.07143 | G |
| 18 | BICF2G630691980         | 47463543 | G | 0.5  | 0.6429  | A |
| 18 | BICF2G630691960         | 47478689 | 0 | 0    | 0       | G |
| 18 | BICF2P513158            | 47493869 | G | 0    | 0       | A |
| 18 | BICF2G630691929         | 47497570 | G | 0    | 0       | A |
| 18 | BICF2G630691907         | 47511597 | A | 0    | 0       | C |
| 18 | BICF2G630691905         | 47512932 | A | 0.5  | 0.6429  | G |
| 18 | BICF2G630691900         | 47516600 | A | 0.25 | 0.2857  | G |
| 18 | BICF2G630691898         | 47519333 | A | 0.25 | 0.25    | G |
| 18 | TIGRP2P253788_rs8882281 | 47530676 | 0 | 0    | 0       | C |
| 18 | BICF2S2367955           | 47543314 | G | 1    | 1       | A |
| 18 | BICF2S2361912           | 47563704 | A | 1    | 1       | G |
| 18 | BICF2G630691859         | 47575493 | G | 1    | 1       | A |
| 18 | BICF2G630691853         | 47577411 | A | 1    | 1       | G |
| 18 | BICF2P138584            | 47597293 | A | 0    | 0       | G |
| 18 | TIGRP2P253802_rs9100995 | 47599456 | A | 1    | 1       | G |
| 18 | BICF2G630691798         | 47603570 | A | 0    | 0       | C |
| 18 | BICF2P383783            | 47619959 | A | 0    | 0       | G |
| 18 | BICF2P694319            | 47627609 | C | 0    | 0       | G |
| 18 | BICF2G630691774         | 47628135 | G | 0    | 0       | A |
| 18 | BICF2P257931            | 47634228 | G | 0.25 | 0.2857  | A |
| 18 | BICF2P660085            | 47645569 | G | 0.75 | 0.9286  | A |
| 18 | BICF2G630691725         | 47659175 | A | 0.25 | 0.07143 | G |
| 18 | BICF2P499704            | 47670852 | A | 0    | 0       | G |
| 18 | BICF2G630691707         | 47691990 | A | 0.5  | 0.3571  | G |
| 18 | BICF2G630691701         | 47702426 | A | 0.25 | 0.07143 | G |
| 18 | BICF2G630691671         | 47723744 | G | 0.25 | 0.07143 | A |
| 18 | BICF2G630691666         | 47730704 | A | 0.25 | 0.07143 | G |
| 18 | BICF2G630691664         | 47731497 | G | 0    | 0.07143 | A |



|    |                 |          |   |      |         |   |
|----|-----------------|----------|---|------|---------|---|
| 18 | BICF2G630691658 | 47746093 | C | 0.25 | 0.07143 | A |
| 18 | BICF2G630691654 | 47750993 | G | 0.25 | 0.07143 | A |
| 18 | BICF2G630691635 | 47777779 | C | 0    | 0.2143  | G |
| 18 | BICF2S23028732  | 47784892 | T | 0    | 0.2143  | A |
| 18 | BICF2G630691586 | 47796237 | G | 0    | 0.1667  | C |
| 18 | BICF2G630691563 | 47814288 | G | 1    | 0.7857  | A |
| 18 | BICF2G630691548 | 47818305 | A | 0    | 0.2143  | G |
| 18 | BICF2G630691523 | 47829126 | A | 0.25 | 0.07143 | G |
| 18 | BICF2G630691519 | 47840240 | C | 0.25 | 0.2857  | A |
| 18 | BICF2G630691514 | 47861896 | C | 0.25 | 0.2857  | G |
| 18 | BICF2G630691508 | 47865642 | A | 0    | 0.2143  | G |
| 18 | BICF2G630691497 | 47878315 | A | 0.25 | 0.07143 | C |
| 18 | BICF2G630691475 | 47889158 | G | 0.25 | 0.07143 | A |
| 18 | BICF2G630691458 | 47894920 | A | 0.5  | 0.5     | G |
| 18 | BICF2G630691442 | 47898713 | A | 0.25 | 0.07143 | C |
| 18 | BICF2S22920989  | 47916509 | A | 0.5  | 0.5     | G |
| 18 | BICF2G630691412 | 47940863 | G | 0.5  | 0.5     | A |
| 18 | BICF2G630691407 | 47944793 | A | 0.5  | 0.5     | G |
| 18 | BICF2G630691391 | 47964730 | A | 0.25 | 0.07143 | G |
| 18 | BICF2G630691373 | 47972398 | A | 0.75 | 0.5714  | G |
| 18 | BICF2G630691371 | 47978149 | C | 0.75 | 0.3333  | A |
| 18 | BICF2G630691338 | 48000073 | C | 1    | 0.7857  | G |
| 18 | BICF2P844269    | 48022612 | A | 0.75 | 0.3571  | C |
| 18 | BICF2G630691318 | 48031941 | G | 0.75 | 0.3571  | A |
| 18 | BICF2P54504     | 48043218 | A | 0    | 0.2143  | G |
| 18 | BICF2P253221    | 48050258 | C | 0.75 | 0.3571  | A |
| 18 | BICF2G630691280 | 48058888 | C | 0.75 | 0.3571  | A |
| 18 | BICF2G630691255 | 48071652 | G | 0.25 | 0.4286  | A |
| 18 | BICF2G630691235 | 48092875 | A | 0.75 | 0.3571  | T |
| 18 | BICF2G630691232 | 48095947 | A | 0.75 | 0.3571  | G |
| 18 | BICF2G630691225 | 48111774 | A | 0.75 | 0.3571  | G |
| 18 | BICF2G630691220 | 48121137 | A | 0.25 | 0.4286  | G |
| 18 | BICF2G630691207 | 48133490 | A | 0.25 | 0.4286  | G |
| 18 | BICF2G630691191 | 48136813 | G | 0.25 | 0.4286  | A |
| 18 | BICF2G630691176 | 48142686 | G | 0.25 | 0.4286  | A |
| 18 | BICF2S23640060  | 48161737 | G | 1    | 0.7857  | A |
| 18 | BICF2S2332567   | 48163036 | A | 1    | 0.7857  | G |
| 18 | BICF2P160807    | 48182416 | A | 0.75 | 0.3571  | G |
| 18 | BICF2G630691162 | 48187773 | G | 0    | 0       | A |
| 18 | BICF2P1296822   | 48206041 | A | 0    | 0       | G |
| 18 | BICF2G630691135 | 48217736 | G | 0.5  | 0.5     | A |
| 18 | BICF2G630691132 | 48227715 | C | 1    | 0.7857  | A |
| 18 | BICF2G630691126 | 48240207 | G | 0.5  | 0.5     | A |
| 18 | BICF2G630691124 | 48246330 | A | NA   | 0.5     | C |
| 18 | BICF2P661524    | 48270430 | A | 0    | 0       | G |
| 18 | BICF2P415105    | 48277062 | C | 0    | 0.2143  | A |
| 18 | BICF2G630691111 | 48292002 | G | 0.25 | 0.07143 | A |

|    |                         |          |   |      |         |   |
|----|-------------------------|----------|---|------|---------|---|
| 18 | BICF2P171590            | 48303402 | A | 0    | 0       | G |
| 18 | BICF2P1294375           | 48312105 | A | 0    | 0       | G |
| 18 | BICF2P665659            | 48324027 | A | 0    | 0       | G |
| 18 | BICF2P716623            | 48343605 | 0 | 0    | 0       | A |
| 18 | BICF2P363979            | 48346088 | 0 | 0    | 0       | G |
| 18 | BICF2S23138475          | 48362380 | 0 | 0    | 0       | G |
| 18 | BICF2G630691029         | 48379771 | 0 | 0    | 0       | G |
| 18 | BICF2P761535            | 48384253 | G | 0    | 0       | A |
| 18 | BICF2G630691025         | 48387624 | 0 | 0    | 0       | G |
| 18 | BICF2G630691013         | 48396465 | A | 1    | 0.7857  | G |
| 18 | G1031f12S132            | 48458060 | A | 0    | 0       | G |
| 18 | BICF2G630691002         | 48461344 | A | 0.25 | 0.07143 | G |
| 18 | BICF2S23550442          | 48481727 | G | 0.25 | 0.4286  | A |
| 18 | BICF2S23317676          | 48489970 | A | 0    | 0       | G |
| 18 | BICF2S23612394          | 48504510 | A | 0    | 0       | G |
| 18 | BICF2P145723            | 48512617 | A | 0.25 | 0.07143 | C |
| 18 | TIGRP2P255075_rs8766079 | 48522395 | G | 0    | 0       | A |
| 18 | BICF2S23453053          | 48544414 | A | 0    | 0.2143  | G |
| 18 | BICF2S23013156          | 48570210 | A | 0.25 | 0.07143 | C |
| 18 | BICF2G630690945         | 48583059 | A | 0    | 0       | G |
| 18 | BICF2G630690944         | 48592877 | A | 0.25 | 0.07143 | G |
| 18 | BICF2G630690941         | 48602402 | A | 0    | 0       | G |
| 18 | BICF2G630690935         | 48617049 | C | 0.5  | 0.7143  | A |
| 18 | BICF2P600444            | 48624348 | A | 0.75 | 0.7143  | G |
| 18 | TIGRP2P255116_rs8641905 | 48637311 | A | 0.25 | 0.4286  | G |
| 18 | TIGRP2P255133_rs8918148 | 48650081 | G | 0.25 | 0.4286  | A |
| 18 | BICF2P1323597           | 48664389 | 0 | 0    | 0       | C |
| 18 | BICF2P506455            | 48671663 | 0 | 0    | 0       | G |
| 18 | TIGRP2P255147_rs9244238 | 48690874 | A | 0    | 0       | G |
| 18 | BICF2G630690874         | 48700512 | A | 0.25 | 0.07143 | G |
| 18 | BICF2P1028258           | 48709855 | G | 0.25 | 0.4286  | A |
| 18 | TIGRP2P255163_rs9132182 | 48720281 | G | 0    | 0       | A |
| 18 | BICF2P742980            | 48733675 | A | 0    | 0       | G |
| 18 | BICF2P111891            | 48735682 | A | 0    | 0       | G |
| 18 | TIGRP2P255169_rs9193849 | 48737133 | A | 0    | 0       | G |
| 18 | BICF2S23255333          | 48757800 | A | 0    | 0       | G |
| 18 | BICF2P556572            | 48761394 | G | 0    | 0       | A |
| 18 | BICF2P578328            | 48773543 | A | 0    | 0       | C |
| 18 | BICF2S22955834          | 48795495 | A | 0    | 0       | C |
| 18 | BICF2G630690867         | 48812275 | G | 0.75 | 0.7143  | A |
| 18 | BICF2P509530            | 48818713 | 0 | 0    | 0       | C |
| 18 | BICF2G630690850         | 48840068 | C | 0.25 | 0.07143 | G |
| 18 | BICF2G630690839         | 48845352 | A | 0.25 | 0.2857  | G |
| 18 | BICF2G630690815         | 48852783 | G | 0.25 | 0.2857  | A |
| 18 | TIGRP2P255219_rs9055635 | 48870625 | 0 | 0    | 0       | C |
| 18 | BICF2P197518            | 48882903 | C | 0    | 0.2143  | A |
| 18 | BICF2P190582            | 48893535 | A | 0    | 0.2143  | C |

|    |                         |          |   |      |         |   |
|----|-------------------------|----------|---|------|---------|---|
| 18 | BICF2G630690779         | 48908335 | G | 1    | 0.7857  | C |
| 18 | BICF2G630690778         | 48909564 | A | 0.75 | 0.7143  | T |
| 18 | BICF2G630690737         | 48922836 | A | 0.25 | 0.6429  | G |
| 18 | BICF2G630690720         | 48936540 | A | 0    | 0.4286  | G |
| 18 | TIGRP2P255248_rs9146141 | 48948702 | A | 0    | 0       | G |
| 18 | BICF2G630690695         | 48960404 | G | 0.25 | 0.4167  | A |
| 18 | BICF2P852706            | 48968877 | A | 0.5  | 0.5     | G |
| 18 | BICF2G630690658         | 48989178 | A | 0    | 0       | G |
| 18 | BICF2P1161758           | 48994945 | A | 1    | 0.8333  | G |
| 18 | BICF2P737470            | 49006318 | A | 0    | 0.2143  | G |
| 18 | TIGRP2P255270_rs9130647 | 49023135 | C | 0.25 | 0.07143 | G |
| 18 | BICF2P842908            | 49024062 | A | 0.25 | 0.07143 | G |
| 18 | TIGRP2P255278_rs8833647 | 49034554 | A | 0.25 | 0.07143 | G |
| 18 | BICF2P282948            | 49043199 | A | 0.25 | 0.07143 | G |
| 18 | BICF2G630690622         | 49050270 | G | 0.75 | 0.7143  | A |
| 18 | BICF2P1111893           | 49069146 | A | 0.25 | 0.2857  | T |
| 18 | BICF2P1510533           | 49075115 | G | 0    | 0       | A |
| 18 | TIGRP2P255298_rs8626216 | 49083656 | A | 0    | 0       | G |
| 18 | TIGRP2P255303_rs9094224 | 49097448 | A | 0    | 0       | G |
| 18 | BICF2P1118188           | 49112646 | G | 0    | 0       | A |
| 18 | BICF2G630690612         | 49136681 | A | 0.75 | 0.7143  | G |
| 18 | BICF2P283700            | 49142690 | A | 0    | 0.2143  | G |
| 18 | BICF2P661093            | 49157774 | A | 0    | 0       | G |
| 18 | BICF2G630690611         | 49165130 | G | 0.75 | 0.3571  | A |
| 18 | BICF2G630690608         | 49176176 | G | 0.5  | 0.2857  | A |
| 18 | BICF2P20153             | 49195730 | G | 0    | 0       | A |
| 18 | BICF2G630690600         | 49204179 | 0 | 0    | 0       | G |
| 18 | BICF2G630690592         | 49210464 | A | 0.25 | 0.4286  | G |
| 18 | BICF2G630690586         | 49223014 | G | 0.25 | 0.4286  | A |
| 18 | BICF2P1350956           | 49239403 | A | 0.25 | 0.4286  | G |
| 18 | BICF2G630690570         | 49244281 | A | 0    | 0.2143  | C |
| 18 | BICF2G630690565         | 49254872 | A | 0    | 0.1667  | G |
| 18 | BICF2G630690546         | 49272602 | A | 0    | 0       | G |
| 18 | BICF2G630690537         | 49281099 | G | 0.5  | 0.2857  | A |
| 18 | TIGRP2P255358_rs8521798 | 49293644 | A | 0.25 | 0.6429  | C |
| 18 | BICF2G630690526         | 49305711 | G | 0.75 | 0.7143  | A |
| 18 | BICF2G630690517         | 49308399 | G | 0.25 | 0.4286  | C |
| 18 | BICF2G630690503         | 49319499 | A | 0.75 | 0.7143  | C |
| 18 | BICF2P646809            | 49329112 | G | 1    | 0.5714  | A |
| 18 | BICF2G630690502         | 49336559 | A | 0    | 0       | C |
| 18 | BICF2G630690495         | 49346732 | G | 0.25 | 0.4286  | A |
| 18 | BICF2G630690483         | 49362141 | A | 0.25 | 0.4286  | C |
| 18 | TIGRP2P255368_rs9232432 | 49370084 | G | 0.5  | 0.5     | A |
| 18 | BICF2G630690458         | 49391218 | A | 0.5  | 0.5     | C |
| 18 | BICF2G630690448         | 49400501 | A | 0.5  | 0.5     | C |
| 18 | BICF2P425021            | 49411148 | G | 0.5  | 0.5     | A |
| 18 | TIGRP2P255391_rs9037748 | 49422655 | A | 0    | 0.4286  | G |

|    |                         |          |   |      |         |   |
|----|-------------------------|----------|---|------|---------|---|
| 18 | BICF2P803236            | 49433113 | 0 | 0    | 0       | C |
| 18 | BICF2P1227903           | 49438642 | G | 0.75 | 0.75    | A |
| 18 | TIGRP2P255420_rs9007813 | 49453770 | A | 0    | 0       | G |
| 18 | BICF2P540759            | 49468947 | A | 0.25 | 0.4286  | G |
| 18 | BICF2P895531            | 49475922 | A | 0.25 | 0.4286  | G |
| 18 | BICF2P324717            | 49488328 | G | 0.25 | 0.4286  | A |
| 18 | TIGRP2P255435_rs9040225 | 49506832 | A | 0    | 0.2143  | G |
| 18 | BICF2P330576            | 49513256 | C | 0    | 0       | A |
| 18 | BICF2P1009950           | 49524572 | G | 0    | 0       | A |
| 18 | BICF2P388880            | 49537419 | A | 0.25 | 0.4286  | G |
| 18 | BICF2P706211            | 49544902 | A | 0.75 | 0.7143  | G |
| 18 | BICF2S22922813          | 49553510 | A | 0    | 0       | C |
| 18 | BICF2P439638            | 49573629 | A | 0.75 | 0.7143  | G |
| 18 | TIGRP2P255441_rs9141130 | 49586747 | 0 | 0    | 0       | A |
| 18 | BICF2P778313            | 49588963 | G | 0.25 | 0.2857  | A |
| 18 | BICF2P1355783           | 49607079 | A | 0.25 | 0.4286  | G |
| 18 | BICF2S23250530          | 49613257 | G | 1    | 1       | A |
| 18 | BICF2P216105            | 49618860 | A | 1    | 1       | G |
| 18 | BICF2P902032            | 49623907 | C | 0    | 0       | A |
| 18 | BICF2P1451267           | 49632449 | G | 1    | 1       | A |
| 18 | BICF2P662508            | 49636393 | T | 0.5  | 0.2857  | A |
| 18 | BICF2S24114122          | 49656916 | C | 0    | 0       | A |
| 18 | BICF2P141093            | 49660377 | C | 1    | 1       | A |
| 18 | TIGRP2P255475_rs9145685 | 49668817 | A | 0    | 0       | G |
| 18 | BICF2P1229934           | 49682000 | 0 | 0    | 0       | G |
| 18 | BICF2P551584            | 49701407 | A | 0    | 0       | G |
| 18 | BICF2P992444            | 49704143 | A | 0    | 0       | G |
| 18 | BICF2S2352396           | 49719314 | C | 0.75 | 0.9286  | A |
| 18 | TIGRP2P255499_rs9108211 | 49736231 | 0 | 0    | 0       | G |
| 18 | TIGRP2P255501_rs8911421 | 49741328 | A | 0    | 0       | G |
| 18 | BICF2S23416521          | 49754295 | A | 0.5  | 0.7143  | G |
| 18 | BICF2P19093             | 49761475 | A | 1    | 1       | G |
| 18 | BICF2S23911641          | 49775171 | 0 | 0    | 0       | G |
| 18 | BICF2P914755            | 49784944 | A | 0.25 | 0.07143 | G |
| 18 | TIGRP2P255538_rs8499429 | 49795980 | A | 0    | 0       | G |
| 18 | BICF2P457075            | 49809779 | A | 0    | 0.2143  | G |
| 18 | BICF2S23162390          | 49824896 | A | 0.75 | 0.7143  | C |
| 18 | BICF2P947444            | 49827140 | A | 0.25 | 0.2857  | G |
| 18 | BICF2P1000383           | 49833607 | A | 0    | 0       | G |
| 18 | TIGRP2P255551_rs8549739 | 49841508 | A | 0    | 0       | G |
| 18 | TIGRP2P255555_rs9133526 | 49847811 | A | 0    | 0       | G |
| 18 | TIGRP2P255560_rs8912865 | 49862379 | A | 0.75 | 0.9286  | G |
| 18 | BICF2P650537            | 49871026 | C | 1    | 0.7857  | A |
| 18 | BICF2S23231932          | 49881610 | A | 0    | 0       | C |
| 18 | BICF2P247671            | 49893654 | A | 0    | 0       | G |
| 18 | TIGRP2P255572_rs8607211 | 49901360 | G | 0.75 | 0.5714  | A |
| 18 | BICF2P1342262           | 49915545 | A | 0.25 | 0.07143 | G |

|    |                         |          |   |      |         |   |
|----|-------------------------|----------|---|------|---------|---|
| 18 | BICF2P213261            | 49925750 | 0 | 0    | 0       | G |
| 18 | BICF2S22936445          | 49937339 | G | 0.75 | 0.7857  | A |
| 18 | TIGRP2P255581_rs9043563 | 49946851 | A | 0.5  | 0.3571  | G |
| 18 | BICF2S23443011          | 49957803 | G | 0.75 | 0.7857  | A |
| 18 | BICF2S2364337           | 49971842 | G | 0.5  | 0.3571  | A |
| 18 | BICF2P406255            | 49987594 | 0 | 0    | 0       | G |
| 18 | BICF2P1447902           | 49990419 | 0 | 0    | 0       | G |
| 18 | BICF2P1306952           | 49995377 | A | 0    | 0.1429  | G |
| 18 | BICF2P145563            | 50003262 | C | 0    | 0       | G |
| 18 | BICF2P1217054           | 50016035 | G | 0    | 0       | C |
| 18 | BICF2P301782            | 50019149 | A | 0    | 0.1429  | G |
| 18 | BICF2P1443554           | 50022556 | G | 0.25 | 0.2143  | A |
| 18 | TIGRP2P255623_rs9023419 | 50029728 | G | 0.5  | 0.5     | A |
| 18 | TIGRP2P255636_rs9183254 | 50046831 | G | 0.25 | 0.4286  | C |
| 18 | BICF2P465366            | 50069150 | A | 0.5  | 0.3571  | G |
| 18 | BICF2P512482            | 50077627 | A | 0.25 | 0.4286  | G |
| 18 | BICF2S23035875          | 50079795 | A | 0    | 0       | G |
| 18 | BICF2S23610213          | 50089172 | G | 0.25 | 0.4286  | A |
| 18 | TIGRP2P255659_rs9120291 | 50094463 | A | 0.25 | 0.4286  | G |
| 18 | BICF2S23420597          | 50107162 | A | 0    | 0.1429  | G |
| 18 | TIGRP2P255673_rs8532414 | 50119458 | G | 0.25 | 0.4286  | A |
| 18 | BICF2P792461            | 50130169 | G | 0.5  | 0.5     | A |
| 18 | BICF2P495223            | 50142197 | C | 0.25 | 0.4286  | A |
| 18 | TIGRP2P255717_rs8864253 | 50169735 | G | 0    | 0.1429  | A |
| 18 | BICF2P1138402           | 50184759 | A | 0.5  | 0.5     | G |
| 18 | BICF2P1458908           | 50187520 | 0 | 0    | 0       | A |
| 18 | TIGRP2P255879_rs8624600 | 50237645 | G | 0.75 | 0.4286  | A |
| 18 | BICF2P849996            | 50247528 | A | 0    | 0       | C |
| 18 | BICF2S23716029          | 50264534 | G | 1    | 0.8571  | A |
| 18 | BICF2P1469122           | 50275334 | G | 0    | 0       | A |
| 18 | BICF2P1469119           | 50275510 | A | 0.25 | 0.5714  | G |
| 18 | BICF2S23219608          | 50282591 | C | 0    | 0       | G |
| 18 | BICF2P1282357           | 50296016 | G | 0.25 | 0.2143  | A |
| 18 | BICF2P1429490           | 50309710 | C | 0.5  | 0.3571  | A |
| 18 | TIGRP2P255917_rs8997251 | 50315190 | A | 0.25 | 0.07143 | G |
| 18 | TIGRP2P255937_rs8553377 | 50327668 | G | 0.5  | 0.3571  | A |
| 18 | BICF2S23649007          | 50339998 | G | 0.5  | 0.3571  | A |
| 18 | TIGRP2P255960_rs9030578 | 50348724 | G | 0    | 0       | A |
| 18 | TIGRP2P255972_rs8808946 | 50358956 | A | 0.75 | 0.4286  | G |
| 18 | BICF2P964118            | 50359100 | A | 0    | 0.1429  | C |
| 18 | TIGRP2P255979_rs8618573 | 50368579 | G | 0.5  | 0.5     | A |
| 18 | BICF2P166738            | 50376576 | A | 0.5  | 0.5     | G |
| 18 | BICF2P894819            | 50383016 | G | 0    | 0       | A |
| 18 | BICF2P947144            | 50403152 | A | 0    | 0       | G |
| 18 | BICF2P257904            | 50409186 | A | 0    | 0       | G |
| 18 | TIGRP2P256040_rs9148501 | 50418281 | A | 0.5  | 0.5     | C |
| 18 | BICF2P1244447           | 50429503 | G | 1    | 0.8571  | C |

|    |                         |          |   |      |         |   |
|----|-------------------------|----------|---|------|---------|---|
| 18 | BICF2P1053924           | 50444449 | C | 0    | 0       | A |
| 18 | TIGRP2P256062_rs8903468 | 50457553 | A | 0    | 0       | G |
| 18 | TIGRP2P256068_rs9066609 | 50470688 | A | 1    | 0.8571  | G |
| 18 | BICF2P81499             | 50480332 | G | 0.25 | 0.07143 | A |
| 18 | BICF2P1122184           | 50495741 | C | 0    | 0       | A |
| 18 | BICF2P631928            | 50505167 | A | 0.75 | 0.4286  | G |
| 18 | BICF2P564688            | 50511535 | A | 0.25 | 0.5714  | G |
| 18 | BICF2S23137405          | 50514077 | A | 0    | 0       | G |
| 18 | BICF2P886185            | 50526740 | A | 0    | 0       | G |
| 18 | BICF2P300523            | 50533498 | G | 0    | 0       | A |
| 18 | BICF2P334629            | 50540550 | C | 0    | 0       | A |
| 18 | BICF2P1347889           | 50543809 | G | 0    | 0       | A |
| 18 | TIGRP2P256128_rs8617369 | 50554709 | C | 0    | 0.1429  | A |
| 18 | BICF2S2342499           | 50569347 | G | 0.25 | 0.5714  | A |
| 18 | BICF2P809440            | 50586286 | G | 0.25 | 0.07143 | A |
| 18 | BICF2P809438            | 50586783 | A | 0    | 0       | G |
| 18 | BICF2P1373194           | 50589755 | G | 0.5  | 0.5     | A |
| 18 | BICF2P1361859           | 50594695 | A | 0    | 0       | G |
| 18 | TIGRP2P256155_rs8629485 | 50605330 | A | 0.5  | 0.3571  | G |
| 18 | BICF2P1217691           | 50612505 | A | 0.25 | 0.2143  | C |
| 18 | BICF2P553598            | 50630567 | G | 1    | 0.8571  | A |
| 18 | BICF2P863660            | 50644587 | G | 0    | 0       | A |
| 18 | BICF2S23531338          | 50648347 | A | 0.25 | 0.07143 | G |
| 18 | BICF2P822092            | 50660490 | G | 0.25 | 0.4286  | A |
| 18 | BICF2P692975            | 50670109 | A | 0    | 0.1429  | C |
| 18 | TIGRP2P256229_rs8538905 | 50683443 | G | 0.5  | 0.6429  | A |
| 18 | BICF2P417531            | 50692809 | A | 0    | 0       | C |
| 18 | TIGRP2P256246_rs8729732 | 50707643 | A | 0    | 0.1429  | G |
| 18 | BICF2P655460            | 50718755 | G | 0    | 0       | A |
| 18 | BICF2S23539810          | 50727690 | G | 0.25 | 0.4286  | A |
| 18 | BICF2P349858            | 50745999 | G | 0.75 | 0.7857  | C |
| 18 | BICF2S23541745          | 50752014 | A | 0.75 | 0.7857  | G |
| 18 | BICF2S22912584          | 50761117 | G | 0    | 0       | A |
| 18 | BICF2P1241859           | 50774350 | A | 0    | 0.1429  | C |
| 18 | BICF2S23333807          | 50782165 | A | 0    | 0       | C |
| 18 | BICF2P870496            | 50786096 | A | 0.75 | 0.7857  | G |
| 18 | BICF2S23254787          | 50797795 | A | 0.25 | 0.2143  | G |
| 18 | BICF2P418397            | 50817483 | A | 0    | 0       | G |
| 18 | BICF2S22912947          | 50821935 | G | 0    | 0       | A |
| 18 | BICF2S23111973          | 50830204 | A | 0.75 | 0.9286  | G |
| 18 | BICF2P787912            | 50845034 | A | 0.75 | 0.4167  | G |
| 18 | TIGRP2P256328_rs8613485 | 50850870 | G | 0.5  | 0.3571  | A |
| 18 | BICF2S23353384          | 50855332 | G | 0    | 0.08333 | A |
| 18 | TIGRP2P256347_rs9173243 | 50872179 | G | 0.5  | 0.3571  | A |
| 18 | TIGRP2P256382_rs8876721 | 50894154 | A | 0.5  | 0.5     | G |
| 18 | BICF2P1041060           | 50908488 | G | 0.5  | 0.5     | A |
| 18 | BICF2P1096132           | 50917403 | G | 0.5  | 0.5     | A |

|    |                         |          |   |      |         |   |
|----|-------------------------|----------|---|------|---------|---|
| 18 | BICF2S23319789          | 50927497 | A | 0    | 0.1429  | G |
| 18 | BICF2P338247            | 50939088 | A | 0    | 0       | G |
| 18 | BICF2S23518307          | 50941302 | T | 1    | 1       | A |
| 18 | BICF2P1411339           | 50945205 | C | 0    | 0       | A |
| 18 | BICF2S22963069          | 50957609 | A | 0.75 | 0.9286  | G |
| 18 | BICF2P1443328           | 50976407 | A | 0    | 0.1429  | G |
| 18 | BICF2S2314810           | 50979984 | G | 0.25 | 0.07143 | A |
| 18 | BICF2P1249163           | 50998306 | A | 0.25 | 0.07143 | G |
| 18 | TIGRP2P256412_rs8554792 | 51017074 | A | 0    | 0       | C |
| 18 | BICF2P440357            | 51034562 | A | 0.75 | 0.9286  | T |
| 18 | BICF2S2345589           | 51035043 | G | 0    | 0       | A |
| 18 | BICF2P793368            | 51040196 | G | 0    | 0       | A |
| 18 | BICF2P21502             | 51053754 | A | 0    | 0       | G |
| 18 | BICF2P844027            | 51068891 | A | 0    | 0       | G |
| 18 | BICF2P844025            | 51070000 | A | 0    | 0       | G |
| 18 | BICF2S23343812          | 51076481 | G | 0    | 0       | A |
| 18 | BICF2P717826            | 51086635 | A | 0.25 | 0.4286  | G |
| 18 | BICF2P262378            | 51096012 | 0 | 0    | 0       | C |
| 18 | BICF2P925558            | 51115068 | G | 0.5  | 0.3571  | A |
| 18 | BICF2S2375468           | 51117769 | G | 0.5  | 0.3571  | A |
| 18 | BICF2P520982            | 51131352 | G | 0.25 | 0.4286  | A |
| 18 | BICF2P76567             | 51150547 | G | 0.25 | 0.4286  | A |
| 18 | BICF2P325585            | 51155540 | A | 0.25 | 0.4286  | G |
| 18 | TIGRP2P256481_rs8811844 | 51164891 | G | 0.5  | 0.5     | A |
| 18 | TIGRP2P256483_rs8658221 | 51176269 | 0 | 0    | 0       | A |
| 18 | BICF2P1380404           | 51192998 | A | 0    | 0       | G |
| 18 | BICF2P1084363           | 51203185 | G | 0    | 0       | A |
| 18 | BICF2P1089519           | 51212802 | G | 0    | 0       | A |
| 18 | BICF2P1434484           | 51237243 | G | 0.5  | 0.3571  | A |
| 18 | BICF2S23314644          | 51245132 | A | 1    | 0.8571  | G |
| 18 | BICF2P458251            | 51259581 | A | 0    | 0.1429  | G |
| 18 | BICF2P956965            | 51267094 | G | 0.5  | 0.6429  | A |
| 18 | BICF2S2303264           | 51280258 | A | 0.5  | 0.3571  | G |
| 18 | BICF2P472851            | 51293436 | G | 0    | 0       | C |
| 18 | BICF2S23554573          | 51305258 | C | 0.75 | 0.5714  | A |
| 18 | BICF2S23029139          | 51315017 | G | 0.75 | 0.5714  | A |
| 18 | TIGRP2P256579_rs8637885 | 51329304 | A | 0    | 0       | G |
| 18 | TIGRP2P256592_rs8630534 | 51339508 | A | 0.75 | 0.5714  | G |
| 18 | BICF2P1267570           | 51344258 | A | 0.5  | 0.5     | G |
| 18 | TIGRP2P256611_rs8514747 | 51349501 | G | 0    | 0       | A |
| 18 | TIGRP2P256622_rs8698633 | 51363902 | A | 0    | 0       | G |
| 18 | BICF2S23346397          | 51371585 | A | 0.5  | 0.6429  | G |
| 18 | BICF2P1326280           | 51382430 | G | 0    | 0       | A |
| 18 | BICF2P1302554           | 51399353 | A | 0.5  | 0.6429  | C |
| 18 | TIGRP2P256653_rs9215722 | 51408632 | A | 0    | 0       | G |
| 18 | BICF2P621859            | 51418439 | G | 0    | 0       | A |
| 18 | BICF2P692377            | 51426102 | A | 0    | 0       | G |

|    |                         |          |   |      |         |   |
|----|-------------------------|----------|---|------|---------|---|
| 18 | BICF2P373162            | 51429975 | A | 0    | 0       | C |
| 18 | BICF2P1196631           | 51455618 | G | 0    | 0       | A |
| 18 | BICF2P277169            | 51473342 | A | 0    | 0       | G |
| 18 | BICF2P723507            | 51480598 | A | 0    | 0       | G |
| 18 | BICF2P148445            | 51494750 | 0 | 0    | 0       | G |
| 18 | BICF2P875668            | 51507721 | A | 0.5  | 0.3571  | G |
| 18 | BICF2S2416950           | 51519049 | 0 | 0    | 0       | A |
| 18 | TIGRP2P256667_rs9118817 | 51527107 | C | 0    | 0.1429  | G |
| 18 | BICF2P945447            | 51547150 | G | 0.75 | 0.5714  | A |
| 18 | BICF2P78119             | 51560662 | G | 0.75 | 0.5714  | A |
| 18 | BICF2P1097926           | 51567982 | A | 0.5  | 0.5     | G |
| 18 | BICF2P1097928           | 51568872 | G | 0.5  | 0.5     | A |
| 18 | BICF2P991737            | 51578564 | A | 0    | 0.1429  | G |
| 18 | BICF2P643821            | 51593393 | A | 0.25 | 0.07143 | G |
| 18 | BICF2P323604            | 51604293 | C | 0    | 0       | G |
| 18 | BICF2P471958            | 51633893 | A | 0    | 0       | G |
| 18 | BICF2P1186932           | 51645249 | A | 0    | 0       | G |
| 18 | BICF2P1186937           | 51646708 | G | 0    | 0       | A |
| 18 | BICF2P1047899           | 51658454 | A | 0.75 | 0.5714  | G |
| 18 | BICF2S23313702          | 51674951 | G | 0    | 0.1429  | A |
| 18 | BICF2P1158264           | 51681697 | 0 | 0    | 0       | G |
| 18 | BICF2P1257831           | 51694595 | A | 0.75 | 0.5714  | G |
| 18 | BICF2S23635050          | 51713330 | A | 0    | 0       | G |
| 18 | BICF2S230609            | 51721581 | G | 0    | 0.1429  | A |
| 18 | BICF2P1038435           | 51731659 | G | 0    | 0       | A |
| 18 | BICF2P776986            | 51743027 | 0 | 0    | 0       | C |
| 18 | BICF2P127386            | 51753066 | G | 0.25 | 0.4286  | A |
| 18 | BICF2P504174            | 51764623 | A | 0.5  | 0.5     | G |
| 18 | BICF2P1077601           | 51773736 | A | 0    | 0       | G |
| 18 | BICF2S23188             | 51784736 | A | 0.5  | 0.3571  | G |
| 18 | BICF2P340967            | 51799810 | A | 0.75 | 0.7857  | G |
| 18 | BICF2S22942608          | 51807834 | A | 0.75 | 0.7857  | G |
| 18 | BICF2P256659            | 51821079 | A | 0.5  | 0.3571  | G |
| 18 | TIGRP2P256732_rs8615011 | 51845742 | A | 1    | 1       | G |
| 18 | TIGRP2P256736_rs8843099 | 51856736 | G | 1    | 0.5714  | A |
| 18 | TIGRP2P256749_rs8858028 | 51865162 | G | 0    | 0       | A |
| 18 | TIGRP2P256755_rs8782527 | 51884456 | A | 0    | 0       | C |
| 18 | BICF2P1365656           | 51898137 | 0 | 0    | 0       | C |
| 18 | BICF2P825637            | 51906828 | 0 | 0    | 0       | A |
| 18 | TIGRP2P256759_rs8946026 | 51912893 | 0 | 0    | 0       | G |
| 18 | BICF2P952628            | 51929873 | 0 | 0    | 0       | G |
| 18 | BICF2P606007            | 51942044 | A | 1    | 1       | G |
| 18 | BICF2P1065701           | 51954791 | G | 0    | 0       | A |
| 18 | BICF2S23220160          | 51958414 | A | 1    | 1       | G |
| 18 | BICF2P637338            | 51971096 | G | 0.5  | 0.6429  | A |
| 18 | TIGRP2P256767_rs9165057 | 51984900 | A | 0    | 0       | G |
| 18 | BICF2P1458103           | 51998317 | G | 0    | 0       | A |



|    |                         |          |   |      |        |   |
|----|-------------------------|----------|---|------|--------|---|
| 18 | BICF2P800415            | 52003837 | G | 0    | 0      | A |
| 18 | BICF2P1176965           | 52022234 | C | 0    | 0      | A |
| 18 | BICF2P904337            | 52034613 | G | 0    | 0      | A |
| 18 | TIGRP2P256807_rs8643312 | 52039865 | 0 | 0    | 0      | G |
| 18 | BICF2P398624            | 52050377 | G | 0    | 0      | A |
| 18 | BICF2P466995            | 52065967 | G | 0    | 0      | A |
| 18 | BICF2P943899            | 52074679 | G | 0    | 0      | A |
| 18 | BICF2P1269241           | 52088945 | G | 0    | 0      | A |
| 18 | BICF2P1269238           | 52089288 | C | 0    | 0      | A |
| 18 | BICF2P906856            | 52090670 | A | 0    | 0      | G |
| 18 | BICF2P735535            | 52095230 | C | 0    | 0      | A |
| 18 | BICF2P798952            | 52108935 | G | 0    | 0      | A |
| 18 | BICF2P1390488           | 52197069 | G | 0.5  | 0.3571 | A |
| 18 | TIGRP2P257039_rs8540108 | 52212210 | 0 | 0    | 0      | C |
| 18 | BICF2P122845            | 52224871 | G | 0.5  | 0.3571 | A |
| 18 | BICF2P375150            | 52237537 | A | 0    | 0      | G |
| 18 | TIGRP2P257054_rs9174846 | 52248702 | T | 0    | 0      | A |
| 18 | TIGRP2P257061_rs8603064 | 52266763 | A | 0    | 0      | G |
| 18 | BICF2P1311321           | 52267011 | A | 0    | 0      | G |
| 18 | TIGRP2P257065_rs8866521 | 52268412 | A | 0.5  | 0.3571 | G |
| 18 | BICF2P863845            | 52281577 | 0 | 0    | 0      | A |
| 18 | BICF2P996921            | 52291251 | A | 0.5  | 0.3571 | G |
| 18 | BICF2P131358            | 52311320 | 0 | 0    | 0      | G |
| 18 | TIGRP2P257081_rs8717839 | 52316185 | C | 0.25 | 0.3571 | G |
| 18 | BICF2S2397432           | 52336307 | G | 0    | 0      | A |
| 18 | BICF2P1401053           | 52344837 | 0 | 0    | 0      | A |
| 18 | TIGRP2P257088_rs8988909 | 52351285 | A | 0    | 0      | T |
| 18 | BICF2P1334576           | 52369783 | G | 0.75 | 0.7143 | A |
| 18 | TIGRP2P257094_rs8651729 | 52381936 | A | 0    | 0      | G |
| 18 | TIGRP2P257095_rs9144279 | 52392344 | 0 | 0    | 0      | G |
| 18 | BICF2P427382            | 52396157 | G | 0.75 | 0.7143 | A |
| 18 | BICF2P103589            | 52413122 | 0 | 0    | 0      | G |
| 18 | BICF2P573201            | 52424059 | 0 | 0    | 0      | A |
| 18 | BICF2P1253013           | 52442355 | C | 0.25 | 0.3571 | A |
| 18 | BICF2P1206619           | 52460935 | A | 0.25 | 0.2857 | G |
| 18 | BICF2S23247723          | 52467625 | C | 0.25 | 0.3571 | A |
| 18 | BICF2P970496            | 52492443 | A | 1    | 1      | G |
| 18 | BICF2P989893            | 52506701 | G | 0.25 | 0.2857 | A |
| 18 | BICF2P1236107           | 52508981 | C | 0.25 | 0.2857 | A |
| 18 | BICF2P1403910           | 52516950 | A | 0.5  | 0.3571 | G |
| 18 | BICF2P1047411           | 52522688 | G | 0    | 0      | A |
| 18 | BICF2S23524738          | 52541756 | A | 0.25 | 0.2857 | G |
| 18 | BICF2S23724815          | 52548320 | A | 0    | 0.3571 | G |
| 18 | BICF2P796362            | 52559103 | G | 0.25 | 0.2857 | C |
| 18 | BICF2P155554            | 52571379 | A | 0.5  | 0.6429 | G |
| 18 | BICF2S23545053          | 52578738 | T | 0.25 | 0.2857 | A |
| 18 | BICF2P775406            | 52597163 | A | 0.25 | 0.2857 | G |

|    |                         |          |   |      |        |   |
|----|-------------------------|----------|---|------|--------|---|
| 18 | BICF2S23713613          | 52607380 | G | 0.25 | 0.2857 | A |
| 18 | BICF2P958336            | 52619327 | A | 0.5  | 0.3571 | G |
| 18 | BICF2P280187            | 52625827 | A | 0.75 | 0.7143 | G |
| 18 | BICF2P922543            | 52646871 | A | 0.25 | 0.2857 | G |
| 18 | BICF2S23436101          | 52656117 | A | 0.25 | 0.2857 | G |
| 18 | BICF2S23356533          | 52664030 | G | 0.25 | 0.3571 | A |
| 18 | TIGRP2P257121_rs8717896 | 52673499 | A | 0.25 | 0.3571 | G |
| 18 | BICF2S2292483           | 52689454 | A | 0.5  | 0.3571 | G |
| 18 | BICF2P527429            | 52699997 | G | 0.25 | 0.3571 | A |
| 18 | BICF2P244615            | 52711812 | A | 0.25 | 0.3571 | G |
| 18 | BICF2P354069            | 52718637 | A | 0    | 0      | G |
| 18 | BICF2P463545            | 52732322 | A | 0.75 | 0.6429 | C |
| 18 | G1032f28S296            | 52756440 | G | 0    | 0      | A |
| 18 | TIGRP2P257136_rs8887009 | 52765623 | 0 | 0    | 0      | G |
| 18 | BICF2S23517314          | 52782734 | G | 0    | 0      | A |
| 18 | BICF2S22936252          | 52788344 | C | 0    | 0      | A |
| 18 | BICF2S23621395          | 52808590 | G | 0    | 0      | A |
| 18 | BICF2P451290            | 52830760 | G | 0    | 0      | A |
| 18 | BICF2P1356988           | 52834452 | G | 0    | 0      | A |
| 18 | BICF2P1438978           | 52840884 | A | 0    | 0      | C |
| 18 | BICF2S23148092          | 52853366 | 0 | 0    | 0      | A |
| 18 | BICF2P486389            | 52856679 | 0 | 0    | 0      | G |
| 18 | BICF2S23513573          | 52881337 | G | 0    | 0      | A |
| 18 | BICF2P662700            | 52897636 | 0 | 0    | 0      | G |
| 18 | BICF2P1230432           | 52904510 | 0 | 0    | 0      | G |
| 18 | BICF2P354113            | 52916534 | G | 0.75 | 0.7143 | A |
| 18 | BICF2P856560            | 52935534 | G | 0    | 0      | A |
| 18 | TIGRP2P257154_rs8794162 | 52950252 | A | 0.5  | 0.3571 | G |
| 18 | BICF2S23334143          | 52962366 | A | 0.75 | 0.6429 | C |
| 18 | BICF2P991307            | 52974034 | G | 0.75 | 0.7143 | A |
| 18 | BICF2P880099            | 52985150 | C | 0.25 | 0.2857 | G |
| 18 | TIGRP2P257166_rs9090161 | 53001956 | A | 0    | 0      | G |
| 18 | BICF2P762157            | 53014634 | A | 0.75 | 0.7143 | G |
| 18 | BICF2P357501            | 53018161 | G | 0.25 | 0.2857 | A |
| 18 | BICF2S23256426          | 53034831 | C | 0    | 0      | A |
| 18 | BICF2P561549            | 53043596 | A | 0.25 | 0.3571 | G |
| 18 | BICF2P297134            | 53056183 | A | 0.75 | 0.7143 | G |
| 18 | BICF2P818360            | 53061095 | 0 | 0    | 0      | G |
| 18 | BICF2P1321100           | 53075392 | A | 0.25 | 0.2857 | G |
| 18 | TIGRP2P257191_rs9061182 | 53085864 | A | 0.25 | 0.2857 | G |
| 18 | BICF2P1127143           | 53097882 | A | 0.25 | 0.3571 | G |
| 18 | BICF2P389456            | 53107036 | A | 0    | 0      | C |
| 18 | BICF2P496954            | 53120122 | G | 1    | 1      | C |
| 18 | BICF2P309942            | 53144552 | A | 0.25 | 0.2857 | G |
| 18 | BICF2P1266531           | 53158717 | A | 0.5  | 0.3571 | G |
| 18 | TIGRP2P257215_rs8817596 | 53178749 | G | 0.5  | 0.6429 | A |
| 18 | BICF2P1321081           | 53189528 | G | 1    | 1      | A |

|    |                         |          |   |      |        |   |
|----|-------------------------|----------|---|------|--------|---|
| 18 | BICF2P448303            | 53197305 | A | 0    | 0      | G |
| 18 | BICF2S23618514          | 53199641 | 0 | 0    | 0      | A |
| 18 | BICF2P1425447           | 53213971 | G | 0    | 0      | A |
| 18 | BICF2P199781            | 53218850 | G | 0    | 0      | A |
| 18 | BICF2P129634            | 53233190 | A | 0    | 0      | G |
| 18 | BICF2P491865            | 53238594 | C | 0    | 0      | A |
| 18 | BICF2S2294761           | 53255126 | A | 0.25 | 0.2857 | G |
| 18 | BICF2P760054            | 53265876 | G | 0    | 0      | A |
| 18 | BICF2P774136            | 53270374 | G | 0    | 0      | A |
| 18 | BICF2P269566            | 53282773 | A | 0.25 | 0.2857 | G |
| 18 | BICF2P352307            | 53299159 | A | 0    | 0      | G |
| 18 | BICF2P600955            | 53304630 | A | 0.25 | 0.2857 | G |
| 18 | BICF2S23760037          | 53318011 | G | 0.25 | 0.2857 | A |
| 18 | BICF2P886405            | 53328085 | G | 0.25 | 0.2857 | A |
| 18 | BICF2P1331303           | 53343975 | G | 0.25 | 0.2857 | A |
| 18 | BICF2P601271            | 53348970 | A | 0.25 | 0.3571 | G |
| 18 | BICF2P660881            | 53361188 | A | 0.25 | 0.2857 | G |
| 18 | BICF2P987362            | 53376883 | C | 0.75 | 0.6429 | A |
| 18 | BICF2P539360            | 53394191 | A | 1    | 1      | G |
| 18 | BICF2P565788            | 53395678 | A | 0.25 | 0.2857 | G |
| 18 | BICF2P493282            | 53430015 | G | 0.25 | 0.2857 | A |
| 18 | BICF2P692874            | 53434356 | G | 0.5  | 0.6429 | A |
| 18 | BICF2P71304             | 53445637 | G | 0.5  | 0.6429 | A |
| 18 | BICF2P1329203           | 53468436 | G | 0.5  | 0.6429 | A |
| 18 | BICF2P638855            | 53481262 | 0 | 0    | 0      | G |
| 18 | BICF2P402057            | 53492710 | 0 | 0    | 0      | G |
| 18 | BICF2P1114254           | 53504136 | 0 | 0    | 0      | G |
| 18 | BICF2S23318724          | 53510099 | G | 0    | 0      | A |
| 18 | BICF2P76201             | 53517306 | A | 0.25 | 0.2857 | G |
| 18 | BICF2S23729128          | 53528573 | G | 0.5  | 0.6429 | A |
| 18 | TIGRP2P257280_rs8798339 | 53533360 | A | 0.25 | 0.3571 | G |
| 18 | BICF2P673322            | 53548349 | 0 | 0    | 0      | A |
| 18 | BICF2P716236            | 53560746 | G | 0.25 | 0.3571 | A |
| 18 | TIGRP2P257301_rs9239545 | 53567240 | A | 0.25 | 0.2857 | G |
| 18 | BICF2P528153            | 53587159 | A | 0.25 | 0.25   | G |
| 18 | BICF2P598561            | 53624062 | A | 0    | 0.3571 | G |
| 18 | TIGRP2P257326_rs9046162 | 53631136 | G | 0.25 | 0.3571 | A |
| 18 | BICF2P1155995           | 53644828 | A | 0    | 0      | G |
| 18 | TIGRP2P257331_rs8834910 | 53650737 | 0 | 0    | 0      | A |
| 18 | TIGRP2P257334_rs8817564 | 53659483 | A | 0.25 | 0.2857 | G |
| 18 | TIGRP2P257336_rs8522754 | 53673127 | A | 0.25 | 0.2857 | G |
| 18 | BICF2P328155            | 53691031 | G | 0.75 | 0.7143 | A |
| 18 | BICF2P753571            | 53696412 | A | 0    | 0      | G |
| 18 | BICF2P753570            | 53696637 | A | 0.25 | 0.2857 | G |
| 18 | BICF2P595902            | 53715047 | A | 0.25 | 0.2857 | G |
| 18 | BICF2P327014            | 53729092 | A | 0.75 | 0.7143 | G |
| 18 | TIGRP2P257350_rs8659648 | 53740869 | C | 0.25 | 0.2857 | A |

|    |                         |          |   |      |        |   |
|----|-------------------------|----------|---|------|--------|---|
| 18 | BICF2P849566            | 53751334 | G | 0.25 | 0.2857 | A |
| 18 | BICF2P1138120           | 53773365 | 0 | 0    | 0      | G |
| 18 | TIGRP2P257353_rs8710167 | 53775202 | A | 0.25 | 0.2857 | G |
| 18 | BICF2P986209            | 53791895 | C | 0.25 | 0.3571 | G |
| 18 | BICF2P753111            | 53819778 | G | 0.5  | 0.6429 | A |
| 18 | TIGRP2P257356_rs9068001 | 53826559 | G | 0.5  | 0.3571 | A |
| 18 | BICF2P1238284           | 53841643 | G | 0    | 0      | A |
| 18 | BICF2P102870            | 53848702 | A | 0.5  | 0.6429 | C |
| 18 | BICF2P1243401           | 53857091 | A | 0    | 0      | G |
| 18 | BICF2S23245261          | 53869556 | A | 1    | 1      | G |
| 18 | BICF2P239886            | 53881685 | G | 0    | 0      | A |
| 18 | BICF2S23510429          | 53892184 | A | 0    | 0      | G |
| 18 | BICF2P1282644           | 53907984 | A | 0.25 | 0.2857 | G |
| 18 | BICF2P730685            | 53912169 | A | 0.5  | 0.3571 | G |
| 18 | BICF2P669674            | 53913829 | C | 0.5  | 0.3571 | A |
| 18 | BICF2P660897            | 53932040 | G | 0.25 | 0.2857 | A |
| 18 | BICF2P868186            | 53938150 | A | 0    | 0      | C |
| 18 | BICF2P1385556           | 53950242 | A | 0    | 0      | G |
| 18 | BICF2P1083379           | 53963654 | A | 0    | 0      | G |
| 18 | BICF2P1337479           | 53979474 | G | 0.5  | 0.6429 | A |
| 18 | BICF2P1337495           | 53981168 | A | 0.25 | 0.2857 | G |
| 18 | TIGRP2P257410_rs8587024 | 53995582 | 0 | 0    | 0      | G |
| 18 | BICF2P326274            | 54008916 | A | 0.5  | 0.3571 | G |
| 18 | BICF2S2364601           | 54016076 | A | 0.25 | 0.3571 | G |
| 18 | BICF2P285239            | 54032877 | C | 0.5  | 0.3571 | A |
| 18 | BICF2P714543            | 54044749 | 0 | 0    | 0      | G |
| 18 | BICF2P1393688           | 54057106 | T | 0.25 | 0.3571 | A |
| 18 | BICF2P152937            | 54062783 | A | 0.75 | 0.6429 | G |
| 18 | TIGRP2P257427_rs8883528 | 54073880 | G | 0    | 0      | A |
| 18 | BICF2S22914876          | 54097514 | A | 0    | 0      | C |
| 18 | BICF2P475440            | 54109588 | 0 | 0    | 0      | A |
| 18 | TIGRP2P257435_rs8515439 | 54171761 | A | 0.75 | 0.6429 | G |
| 18 | BICF2P1385061           | 54186465 | 0 | 0    | 0      | A |
| 18 | TIGRP2P257443_rs8758924 | 54201253 | 0 | 0    | 0      | T |
| 18 | BICF2P404015            | 54215262 | 0 | 0    | 0      | G |
| 18 | BICF2P498566            | 54223287 | 0 | 0    | 0      | G |
| 18 | BICF2P647693            | 54240043 | G | 0.25 | 0.3571 | A |
| 18 | BICF2S23449093          | 54249628 | G | 0    | 0      | A |
| 18 | BICF2S22951207          | 54250810 | C | 0    | 0      | A |
| 18 | BICF2P1121006           | 54279578 | A | 0.75 | 0.6429 | G |
| 18 | BICF2S23645462          | 54287582 | A | 0.75 | 0.6429 | G |
| 18 | BICF2P1392464           | 54297593 | G | 0.75 | 0.6429 | A |
| 18 | BICF2P514029            | 54304811 | A | 0    | 0      | G |
| 18 | BICF2P1217541           | 54319111 | A | 0    | 0      | G |
| 18 | BICF2S2321567           | 54335910 | A | 0    | 0      | G |
| 18 | BICF2P257479            | 54343940 | A | 0    | 0      | T |
| 18 | BICF2S23762769          | 54358927 | A | 0    | 0      | G |

|    |                         |          |   |      |        |   |
|----|-------------------------|----------|---|------|--------|---|
| 18 | BICF2P1270316           | 54370664 | A | 0    | 0      | G |
| 18 | BICF2P1323622           | 54372655 | G | 0    | 0      | A |
| 18 | BICF2P288374            | 54387390 | A | 0.5  | 0.6429 | C |
| 18 | BICF2P680854            | 54395197 | G | 0.5  | 0.3571 | A |
| 18 | BICF2S23114247          | 54406433 | A | 0.5  | 0.6429 | G |
| 18 | BICF2S23632166          | 54407354 | A | 0    | 0      | G |
| 18 | TIGRP2P257487_rs8554595 | 54419119 | A | 0    | 0      | G |
| 18 | BICF2P307626            | 54429686 | 0 | 0    | 0      | A |
| 18 | BICF2S23642052          | 54448130 | A | 0    | 0      | G |
| 18 | BICF2S23056626          | 54467391 | A | 0    | 0      | C |
| 18 | TIGRP2P257502_rs8543850 | 54478758 | G | 0.5  | 0.6429 | A |
| 18 | BICF2P350163            | 54487519 | G | 0.25 | 0.2857 | A |
| 18 | BICF2S2304860           | 54526618 | A | 0.25 | 0.1429 | G |
| 18 | BICF2P455372            | 54538894 | A | 0.25 | 0.5    | G |
| 18 | BICF2P617199            | 54548207 | A | 0    | 0      | G |
| 18 | BICF2P681930            | 54556965 | A | 0    | 0      | G |
| 18 | BICF2S23026958          | 54576931 | G | 0.75 | 0.8571 | A |
| 18 | TIGRP2P257527_rs9095347 | 54579523 | 0 | 0    | 0      | G |
| 18 | BICF2P1294726           | 54593383 | A | 0.5  | 0.3571 | G |
| 18 | BICF2S2336963           | 54610770 | A | 0.5  | 0.3571 | G |
| 18 | BICF2S2377144           | 54616428 | A | 0.5  | 0.3571 | G |
| 18 | BICF2P380283            | 54625697 | G | 0.5  | 0.6429 | A |
| 18 | BICF2S23732482          | 54637411 | A | 0    | 0      | G |
| 18 | BICF2P210400            | 54648370 | A | 0.75 | 0.5    | G |
| 18 | BICF2P550699            | 54662234 | G | 0.75 | 0.8571 | A |
| 18 | BICF2P346272            | 54672357 | G | 1    | 1      | A |
| 18 | BICF2P890725            | 54692893 | G | 0.75 | 0.5    | A |
| 18 | TIGRP2P257539_rs9164396 | 54695199 | 0 | 0    | 0      | C |
| 18 | TIGRP2P257540_rs8913318 | 54707786 | A | 0.5  | 0.3571 | G |
| 18 | TIGRP2P257552_rs8683720 | 54718489 | 0 | 0    | 0      | G |
| 18 | TIGRP2P257554_rs8864638 | 54733700 | G | 0.25 | 0.5    | A |
| 18 | BICF2P1459728           | 54758078 | A | 0    | 0.1429 | G |
| 18 | BICF2P426574            | 54764043 | C | 0    | 0      | A |
| 18 | BICF2P1132779           | 54777795 | A | 0.75 | 0.8571 | G |
| 18 | BICF2P1445667           | 54786928 | C | 0    | 0      | A |
| 18 | BICF2P1445665           | 54788005 | A | 0.75 | 0.8571 | T |
| 18 | BICF2P1047524           | 54796248 | A | 0.25 | 0.1429 | G |
| 18 | TIGRP2P257566_rs8763084 | 54796618 | A | 0.25 | 0.1429 | G |
| 18 | BICF2P1388329           | 54797740 | G | 0.25 | 0.1429 | A |
| 18 | BICF2P1238819           | 54809788 | C | 0.25 | 0.1429 | A |
| 18 | BICF2P28982             | 54820227 | A | 0.25 | 0.1429 | G |
| 18 | TIGRP2P257590_rs8745165 | 54830744 | G | 0    | 0      | A |
| 18 | BICF2P1078664           | 54831265 | A | 0    | 0      | T |
| 18 | BICF2P642311            | 54837807 | G | 0.5  | 0.3571 | A |
| 18 | BICF2S22952353          | 54853685 | G | 0.5  | 0.3571 | A |
| 18 | BICF2P903308            | 54870258 | G | 0    | 0      | A |
| 18 | TIGRP2P257607_rs8946209 | 54883940 | G | 0.25 | 0.1429 | A |

|    |                         |          |   |      |        |   |
|----|-------------------------|----------|---|------|--------|---|
| 18 | BICF2S2394933           | 54898378 | G | 1    | 1      | A |
| 18 | BICF2P785349            | 54902636 | 0 | 0    | 0      | G |
| 18 | BICF2P521240            | 54931625 | A | 0.25 | 0.1429 | G |
| 18 | BICF2P471658            | 54940663 | A | 0.75 | 0.8571 | G |
| 18 | BICF2S23138128          | 54949374 | G | 0.5  | 0.25   | A |
| 18 | BICF2P525884            | 54961775 | A | 0.5  | 0.3571 | G |
| 18 | BICF2P574162            | 54968633 | A | 0    | 0      | C |
| 18 | BICF2P156099            | 54981333 | G | 0.25 | 0.1429 | C |
| 18 | BICF2P156097            | 54982188 | G | 0.25 | 0.1429 | A |
| 18 | BICF2P992514            | 54990191 | G | 0.5  | 0.3571 | A |
| 18 | TIGRP2P257609_rs9068099 | 54993754 | 0 | 0    | 0      | A |
| 18 | BICF2P427970            | 55011396 | A | 0.5  | 0.3571 | G |
| 18 | BICF2P651617            | 55033139 | A | 0    | 0      | G |
| 18 | G1033f31S196            | 55051268 | 0 | 0    | 0      | C |
| 18 | BICF2S2396351           | 55074034 | C | 0    | 0      | A |
| 18 | BICF2S23348984          | 55091491 | A | 0    | 0      | G |
| 18 | BICF2P1228350           | 55104658 | 0 | 0    | 0      | A |
| 18 | TIGRP2P257616_rs8597255 | 55108973 | A | 0    | 0      | C |
| 18 | BICF2P58585             | 55129790 | A | 1    | 1      | G |
| 18 | BICF2P397053            | 55131115 | A | 1    | 1      | G |
| 18 | BICF2S23514719          | 55158205 | A | 0.75 | 0.8571 | G |
| 18 | BICF2S2328894           | 55171230 | A | 0    | 0      | G |
| 18 | BICF2P1181774           | 55179291 | A | 0    | 0      | G |
| 18 | BICF2S24317926          | 55194564 | G | 0.5  | 0.3571 | A |
| 18 | TIGRP2P257664_rs9019461 | 55208015 | G | 0    | 0      | A |
| 18 | TIGRP2P257665_rs9186570 | 55216217 | A | 0.5  | 0.6667 | G |
| 18 | BICF2P268862            | 55226728 | 0 | 0    | 0      | A |
| 18 | BICF2P1035469           | 55234892 | A | 0    | 0      | G |
| 18 | TIGRP2P257674_rs8762297 | 55267589 | A | 0    | 0      | G |
| 18 | BICF2S23640537          | 55268486 | A | 0    | 0      | C |
| 18 | BICF2P1173002           | 55273577 | G | 0.75 | 0.8571 | A |
| 18 | BICF2P1205025           | 55288018 | A | 0.5  | 0.3571 | G |
| 18 | BICF2P1205024           | 55288347 | A | 0.5  | 0.3571 | G |
| 18 | BICF2S23714241          | 55294891 | G | 0    | 0      | A |
| 18 | BICF2P363526            | 55311435 | A | 0.5  | 0.3571 | G |
| 18 | TIGRP2P257682_rs8889248 | 55324100 | 0 | 0    | 0      | C |
| 18 | BICF2P813972            | 55324167 | A | 0.5  | 0.6429 | G |
| 18 | BICF2P951259            | 55324701 | G | 0.5  | 0.6429 | A |
| 18 | BICF2P951242            | 55327442 | A | 0.5  | 0.3571 | G |
| 18 | BICF2P1323068           | 55338385 | 0 | 0    | 0      | A |
| 18 | BICF2P519967            | 55349875 | A | 0.5  | 0.3571 | G |
| 18 | TIGRP2P257698_rs9068290 | 55363050 | A | 0    | 0      | G |
| 18 | BICF2P1195591           | 55405914 | C | 0    | 0      | A |
| 18 | BICF2S23353092          | 55417402 | A | 0    | 0      | G |
| 18 | BICF2P13828             | 55418743 | C | 0.75 | 0.7857 | G |
| 18 | BICF2P529444            | 55431679 | 0 | 0    | 0      | A |
| 18 | BICF2P647600            | 55450863 | A | 0.5  | 0.6429 | G |

|    |                         |          |   |      |        |   |
|----|-------------------------|----------|---|------|--------|---|
| 18 | BICF2P1003052           | 55457553 | A | 0.75 | 0.7857 | G |
| 18 | BICF2P1124170           | 55471044 | C | 0    | 0      | G |
| 18 | BICF2P1325374           | 55483048 | G | 1    | 1      | A |
| 18 | BICF2P1340374           | 55491708 | G | 0.25 | 0.2143 | A |
| 18 | TIGRP2P257729_rs8694548 | 55499285 | A | 0.25 | 0.2143 | G |
| 18 | BICF2P1278708           | 55516531 | A | 0    | 0      | G |
| 18 | BICF2P654914            | 55531752 | C | 0    | 0      | G |
| 18 | TIGRP2P257754_rs9083337 | 55538946 | A | 0    | 0      | G |
| 18 | BICF2P1003219           | 55555827 | A | 0.75 | 0.7857 | G |
| 18 | BICF2P330651            | 55564293 | A | 0.75 | 0.7857 | G |
| 18 | TIGRP2P257766_rs8522256 | 55577267 | G | 0    | 0      | A |
| 18 | TIGRP2P257767_rs8765561 | 55584305 | G | 1    | 1      | A |
| 18 | BICF2S2312188           | 55597108 | G | 0    | 0      | A |
| 18 | BICF2P399601            | 55610599 | A | 0    | 0      | C |
| 18 | TIGRP2P257776_rs8829145 | 55621879 | A | 0    | 0      | C |
| 18 | BICF2S2332165           | 55634008 | A | 0.75 | 0.7857 | G |
| 18 | TIGRP2P257778_rs9079155 | 55643887 | C | 1    | 0.7857 | A |
| 18 | BICF2S22953512          | 55657283 | G | 0.75 | 0.7857 | A |
| 18 | BICF2S23136721          | 55660718 | G | 0.75 | 0.7857 | A |
| 18 | BICF2S23127989          | 55674540 | A | 0.75 | 0.7857 | T |
| 18 | BICF2S23749060          | 55683560 | G | 0    | 0      | A |
| 18 | BICF2P1058980           | 55698036 | 0 | 0    | 0      | G |
| 18 | TIGRP2P257801_rs8794924 | 55707809 | G | 0.75 | 0.7857 | A |
| 18 | BICF2P899829            | 55734548 | A | 0.75 | 0.7857 | G |
| 18 | BICF2P1242405           | 55749503 | A | 0.25 | 0.2143 | G |
| 18 | BICF2P1394435           | 55763060 | A | 0    | 0      | G |
| 18 | BICF2P604525            | 55769759 | A | 0    | 0      | G |
| 18 | BICF2P659200            | 55778402 | G | 1    | 1      | A |
| 18 | BICF2S23654132          | 55790459 | A | 0    | 0      | C |
| 18 | BICF2P617558            | 55803431 | A | 0.25 | 0.4286 | G |
| 18 | BICF2S23240344          | 55812624 | G | 0.5  | 0.3571 | A |
| 18 | TIGRP2P257826_rs9049457 | 55831463 | G | 0.5  | 0.3571 | A |
| 18 | TIGRP2P257827_rs9184918 | 55837832 | T | 0.5  | 0.3571 | A |
| 18 | BICF2P954402            | 55848919 | 0 | 0    | 0      | A |
| 18 | BICF2P1026445           | 55860486 | A | 0    | 0      | G |
| 18 | BICF2P105400            | 55872249 | G | 0    | 0      | A |
| 18 | BICF2P981585            | 55879936 | A | 0.5  | 0.3571 | G |
| 18 | BICF2S23647169          | 55891465 | A | 0    | 0      | C |
| 18 | BICF2P151515            | 55907617 | G | 0    | 0      | A |
| 18 | BICF2P577472            | 55922946 | G | 0.5  | 0.2143 | A |
| 18 | BICF2S23130133          | 55924115 | A | 0.5  | 0.3571 | G |
| 18 | BICF2P694126            | 55935419 | G | 0.5  | 0.2143 | A |
| 18 | BICF2S2341553           | 55938478 | A | 0.5  | 0.3571 | G |
| 18 | BICF2S23327252          | 55952777 | C | 1    | 0.5714 | A |
| 18 | BICF2P128727            | 55964850 | G | 1    | 0.5833 | A |
| 18 | BICF2P87507             | 55976410 | A | 0.5  | 0.3571 | G |
| 18 | BICF2P1404050           | 55997656 | 0 | 0    | 0      | G |

|    |                         |          |   |     |        |   |
|----|-------------------------|----------|---|-----|--------|---|
| 18 | TIGRP2P257891_rs9104176 | 56007590 | G | 0.5 | 0.3571 | A |
| 18 | BICF2P958427            | 56024596 | A | 1   | 0.5714 | G |
| 18 | BICF2P313646            | 56032099 | A | 1   | 0.5714 | C |
| 18 | BICF2P489644            | 56049929 | G | 0.5 | 0.3571 | A |
| 18 | BICF2P474131            | 56051164 | G | 0.5 | 0.3571 | A |
| 18 | TIGRP2P257922_rs8853375 | 56056094 | A | 0   | 0      | G |
| 18 | BICF2P954847            | 56064668 | G | 0.5 | 0.3571 | A |
| 18 | BICF2S23348437          | 56082538 | A | 0.5 | 0.3571 | G |
| 18 | BICF2P96580             | 56108368 | G | 0.5 | 0.3571 | A |
| 18 | BICF2S23057148          | 56114387 | A | 0.5 | 0.3571 | G |
| 18 | TIGRP2P257937_rs8569396 | 56124840 | G | 1   | 1      | A |
| 18 | BICF2P111620            | 56140309 | 0 | 0   | 0      | G |
| 18 | BICF2P77393             | 56143098 | G | 0   | 0      | A |
| 18 | BICF2P1417852           | 56160503 | A | 1   | 1      | G |
| 18 | BICF2P141943            | 56171752 | A | 0   | 0      | G |
| 18 | BICF2P658457            | 56178762 | 0 | 0   | 0      | C |
| 18 | BICF2S23729234          | 56198900 | A | 0   | 0      | G |
| 18 | TIGRP2P257942_rs8857062 | 56217336 | 0 | 0   | 0      | G |
| 18 | BICF2P553326            | 56229201 | A | 0   | 0      | G |
| 18 | BICF2S22931556          | 56260105 | C | 0   | 0      | A |
| 18 | BICF2S22937052          | 56274553 | A | 0.5 | 0.7857 | G |
| 18 | BICF2S23350831          | 56287484 | A | 0   | 0      | G |
| 18 | BICF2S23652663          | 56301341 | A | 0   | 0      | G |
| 18 | BICF2S23653202          | 56305796 | G | 0   | 0      | A |
| 18 | TIGRP2P257945_rs9019940 | 56327427 | G | 0   | 0      | A |
| 18 | BICF2S23644810          | 56341550 | A | 0   | 0      | T |
| 18 | BICF2S23327658          | 56379084 | C | 0   | 0      | A |
| 18 | BICF2P284128            | 56392515 | 0 | 0   | 0      | A |
| 18 | TIGRP2P257952_rs9046890 | 56398465 | C | 0   | 0      | A |
| 18 | BICF2P173476            | 56409275 | A | 0.5 | 0.7857 | G |
| 18 | BICF2S2324489           | 56425335 | G | 0   | 0      | C |
| 18 | BICF2S23616763          | 56432122 | A | 0.5 | 0.2143 | G |
| 18 | BICF2S230148            | 56443855 | A | 0   | 0      | C |
| 18 | BICF2S2342366           | 56457221 | A | 0   | 0      | G |
| 18 | BICF2P430719            | 56472383 | G | 0.5 | 0.7857 | A |
| 18 | BICF2P268239            | 56476767 | A | 0.5 | 0.8333 | C |
| 18 | BICF2P1103623           | 56490641 | A | 0.5 | 0.7857 | C |
| 18 | BICF2P1332846           | 56503107 | G | 0.5 | 0.7857 | A |
| 18 | BICF2S2378753           | 56505006 | C | 0.5 | 0.7857 | A |
| 18 | BICF2P100996            | 56515739 | A | 0.5 | 0.7857 | C |
| 18 | BICF2P1286619           | 56529769 | A | 0.5 | 0.7857 | T |
| 18 | BICF2P1026640           | 56534406 | G | 0.5 | 0.7857 | A |
| 18 | BICF2P1308450           | 56554715 | A | 0   | 0      | G |
| 18 | BICF2P188485            | 56558255 | T | 0.5 | 0.7857 | A |
| 18 | BICF2P95676             | 56571888 | 0 | 0   | 0      | G |
| 18 | BICF2P1041334           | 56603453 | A | 0   | 0      | C |
| 18 | G1034f11S261            | 56625392 | 0 | 0   | 0      | C |



|    |                         |          |   |     |        |   |
|----|-------------------------|----------|---|-----|--------|---|
| 18 | G1034f12S211            | 56626081 | 0 | 0   | 0      | C |
| 18 | BICF2S2459616           | 56656148 | T | 0   | 0      | A |
| 18 | G1035f14S289            | 56665717 | 0 | 0   | 0      | C |
| 18 | BICF2P325700            | 56688227 | 0 | 0   | 0      | A |
| 18 | BICF2S23748222          | 56716381 | G | 0   | 0      | A |
| 18 | BICF2P314364            | 56720741 | G | 0.5 | 0.7857 | A |
| 18 | BICF2G630690075         | 56736474 | G | 0.5 | 0.7857 | A |
| 18 | BICF2G630690068         | 56741804 | C | 0.5 | 0.7857 | A |
| 18 | BICF2G630690061         | 56754830 | A | 0   | 0      | G |
| 18 | BICF2G630690058         | 56789806 | A | 0   | 0.1429 | G |
| 18 | BICF2S23036968          | 56804695 | A | 0   | 0      | G |
| 18 | BICF2G630690056         | 56820654 | A | 0   | 0      | G |
| 18 | BICF2P832867            | 56843611 | 0 | 0   | 0      | T |
| 18 | BICF2G630690051         | 56847005 | A | 0.5 | 0.7857 | G |
| 18 | TIGRP2P258020_rs8855309 | 56868372 | G | 1   | 1      | A |
| 18 | BICF2G630690023         | 56875884 | A | 1   | 1      | G |
| 18 | BICF2G630690015         | 56886066 | A | 0.5 | 0.6429 | G |
| 18 | BICF2G630690012         | 56890639 | A | 0.5 | 0.2143 | G |
| 18 | BICF2G630690007         | 56912498 | G | 0.5 | 0.2143 | A |
| 18 | BICF2G630690005         | 56915538 | G | 0.5 | 0.2143 | A |
| 18 | BICF2P94022             | 56925089 | G | 0.5 | 0.2143 | A |
| 18 | BICF2P619768            | 56938275 | A | 0.5 | 0.5    | C |
| 18 | BICF2G630689985         | 56953520 | G | 0.5 | 0.2143 | A |
| 18 | BICF2G630689983         | 56963676 | G | 0.5 | 0.2143 | A |
| 18 | BICF2G630689980         | 56973678 | A | 0   | 0      | G |
| 18 | BICF2G630689973         | 56982666 | G | 0   | 0      | A |
| 18 | TIGRP2P258032_rs9199069 | 57009994 | 0 | 0   | 0      | A |
| 18 | BICF2S22960625          | 57022646 | T | 0.5 | 0.2143 | A |
| 18 | BICF2P1195751           | 57029319 | A | 0.5 | 0.2143 | G |
| 18 | BICF2S23127684          | 57039435 | A | 0.5 | 0.3571 | G |
| 18 | BICF2P607715            | 57049186 | C | 0   | 0.1429 | G |
| 18 | BICF2P449132            | 57062556 | A | 0.5 | 0.6429 | C |
| 18 | BICF2P518488            | 57069106 | C | 0.5 | 0.2143 | G |
| 18 | BICF2P1043861           | 57085836 | G | 0.5 | 0.3571 | A |
| 18 | BICF2P1043864           | 57086495 | G | 0.5 | 0.3571 | A |
| 18 | BICF2G630689944         | 57090449 | A | 0   | 0      | C |
| 18 | BICF2G630689934         | 57107053 | A | 0   | 0      | G |
| 18 | BICF2S23050110          | 57113926 | A | 0.5 | 0.6429 | T |
| 18 | BICF2P1214575           | 57120547 | A | 0   | 0.1429 | C |
| 18 | BICF2P554932            | 57132811 | G | 1   | 0.5833 | A |
| 18 | BICF2P540970            | 57141400 | A | 1   | 0.5714 | G |
| 18 | BICF2S23651046          | 57153558 | A | 0.5 | 0.2143 | C |
| 18 | BICF2P754151            | 57155414 | C | 1   | 0.5714 | A |
| 18 | BICF2P35571             | 57173362 | G | 0   | 0      | A |
| 18 | BICF2G630689920         | 57182470 | G | 0   | 0.2857 | A |
| 18 | BICF2P1456232           | 57193346 | A | 0   | 0      | G |
| 18 | BICF2G630689897         | 57206924 | C | 0   | 0      | A |

|    |                         |          |   |     |        |   |
|----|-------------------------|----------|---|-----|--------|---|
| 18 | BICF2P635275            | 57218658 | G | 1   | 1      | A |
| 18 | BICF2G630689894         | 57226666 | C | 1   | 0.5714 | A |
| 18 | TIGRP2P258105_rs8647168 | 57236860 | G | 0   | 0      | A |
| 18 | BICF2G630689855         | 57253933 | A | 0   | 0      | G |
| 18 | BICF2G630689845         | 57261238 | G | 0.5 | 0.7857 | A |
| 18 | BICF2G630689834         | 57275958 | C | 0   | 0.1429 | A |
| 18 | BICF2G630689818         | 57282760 | A | 0   | 0      | G |
| 18 | BICF2G630689790         | 57296575 | A | 0.5 | 0.6667 | G |
| 18 | BICF2G630689403         | 57387251 | G | 0   | 0.4286 | A |
| 18 | BICF2G630689384         | 57405100 | A | 0   | 0.2857 | G |
| 18 | BICF2G630689379         | 57409134 | A | 0   | 0.2857 | C |
| 18 | BICF2G630689336         | 57440176 | A | 0   | 0.2857 | G |
| 18 | BICF2P459254            | 57444403 | C | 0   | 0.2857 | A |
| 18 | BICF2S23040694          | 57465030 | A | 0   | 0.2857 | G |
| 18 | BICF2P990779            | 57466380 | G | 0   | 0.4286 | A |
| 18 | BICF2P1299767           | 57477631 | G | 0.5 | 0.5    | A |
| 18 | BICF2G630689306         | 57492643 | G | 0.5 | 0.5    | A |
| 18 | TIGRP2P258194_rs8690332 | 57492686 | G | 0.5 | 0.5    | A |
| 18 | BICF2P672643            | 57494297 | G | 0.5 | 0.5    | A |
| 18 | BICF2G630689290         | 57501375 | G | 0   | 0      | A |
| 18 | BICF2G630689289         | 57503630 | G | 0.5 | 0.2143 | A |
| 18 | BICF2G630689266         | 57512926 | A | 0   | 0.4286 | G |
| 18 | BICF2P1191471           | 57534041 | G | 1   | 0.5714 | A |
| 18 | BICF2G630689258         | 57540310 | A | 0   | 0      | G |
| 18 | BICF2G630689256         | 57547107 | A | 0   | 0      | G |
| 18 | BICF2G630689221         | 57557721 | G | 0.5 | 0.2143 | A |
| 18 | BICF2P322893            | 57561150 | A | 0   | 0      | G |
| 18 | BICF2P322892            | 57561446 | A | 0   | 0      | G |
| 18 | BICF2G630689208         | 57570464 | C | 1   | 0.7143 | A |
| 18 | BICF2P857836            | 57585572 | A | 0   | 0.4286 | G |
| 18 | BICF2G630689191         | 57590666 | A | 1   | 1      | G |
| 18 | BICF2G630689179         | 57599964 | G | 0   | 0      | A |
| 18 | BICF2P1138445           | 57608487 | G | 0   | 0.2857 | C |
| 18 | BICF2S23612882          | 57615009 | A | 0.5 | 0.3571 | G |
| 18 | BICF2G630689163         | 57624223 | C | 1   | 0.7143 | A |
| 18 | BICF2G630689150         | 57628580 | G | 1   | 0.7143 | A |
| 18 | BICF2P773009            | 57645553 | G | 0.5 | 0.3571 | A |
| 18 | BICF2P35019             | 57651261 | G | 0   | 0.1429 | A |
| 18 | BICF2P481215            | 57666408 | G | 0.5 | 0.3571 | A |
| 18 | BICF2G630689134         | 57682619 | C | 0   | 0.2857 | A |
| 18 | BICF2S22928810          | 57720550 | A | 0.5 | 0.3571 | G |
| 18 | TIGRP2P258314_rs9031835 | 57737874 | A | 0   | 0      | G |
| 18 | BICF2S232248            | 57743472 | A | 0   | 0      | G |
| 18 | BICF2P889108            | 57766746 | G | 0   | 0      | A |
| 18 | BICF2S23547885          | 57782548 | A | 0   | 0      | C |
| 18 | BICF2P763370            | 57792406 | A | 0.5 | 0.3571 | G |
| 18 | TIGRP2P258337_rs9170650 | 57809177 | G | 0.5 | 0.3571 | A |

|    |                         |          |   |     |        |   |
|----|-------------------------|----------|---|-----|--------|---|
| 18 | BICF2P984011            | 57811069 | A | 0.5 | 0.3571 | G |
| 18 | BICF2P984014            | 57812034 | A | 0.5 | 0.2143 | G |
| 18 | BICF2P1066009           | 57832548 | C | 0   | 0      | G |
| 18 | BICF2P348961            | 57843654 | A | 1   | 0.5714 | G |
| 18 | BICF2P968731            | 57848127 | G | 0.5 | 0.2143 | A |
| 18 | TIGRP2P258370_rs8552298 | 57861070 | A | 0   | 0      | G |
| 18 | BICF2P1393961           | 57872817 | A | 0.5 | 0.3571 | G |
| 18 | BICF2P1393962           | 57873037 | G | 0.5 | 0.7857 | A |
| 18 | BICF2P5593              | 57886842 | A | 0   | 0      | G |
| 18 | BICF2P429669            | 57889603 | G | 0.5 | 0.7857 | A |
| 18 | BICF2P913965            | 57890762 | A | 0   | 0      | G |
| 18 | BICF2P913966            | 57891308 | A | 0   | 0      | G |
| 18 | BICF2P1151002           | 57906861 | A | 0.5 | 0.2143 | G |
| 18 | BICF2S23031258          | 57914315 | C | 0   | 0      | G |
| 18 | BICF2P1340340           | 57931019 | G | 1   | 0.5714 | A |
| 18 | BICF2P880423            | 57940528 | A | 0.5 | 0.2143 | C |
| 18 | BICF2P77407             | 57949312 | A | 0.5 | 0.2143 | G |
| 18 | BICF2P824544            | 57964870 | A | 0   | 0      | G |
| 18 | BICF2P144945            | 57971164 | A | 0.5 | 0.2143 | C |
| 18 | BICF2P1273350           | 57976815 | A | 1   | 0.5833 | G |
| 18 | TIGRP2P258431_rs8852305 | 57991610 | G | 0.5 | 0.7857 | A |
| 18 | BICF2S23242460          | 57997900 | G | 0.5 | 0.2143 | A |
| 18 | BICF2P508063            | 58017084 | A | 0.5 | 0.2143 | C |
| 18 | BICF2S23712670          | 58022537 | A | 0   | 0      | G |
| 18 | TIGRP2P258441_rs9113860 | 58035684 | A | 0.5 | 0.3571 | C |
| 18 | TIGRP2P258452_rs8558905 | 58063218 | C | 0   | 0      | A |
| 18 | TIGRP2P258453_rs9232480 | 58065983 | A | 0   | 0.4286 | G |
| 18 | BICF2P1460948           | 58075653 | A | 1   | 0.5714 | C |
| 18 | BICF2P1177957           | 58086701 | G | 1   | 0.5714 | A |
| 18 | BICF2S23535747          | 58102234 | A | 0   | 0      | C |
| 18 | BICF2S2313088           | 58113200 | G | 0   | 0      | A |
| 18 | BICF2P110078            | 58129453 | 0 | 0   | 0      | C |
| 18 | BICF2P1233353           | 58133494 | A | 0.5 | 0.2143 | G |
| 18 | BICF2P1117116           | 58154859 | A | 0.5 | 0.6429 | G |
| 18 | TIGRP2P258496_rs9172437 | 58163228 | G | 0.5 | 0.3571 | A |
| 18 | BICF2P965319            | 58169176 | A | 0.5 | 0.2143 | C |
| 18 | TIGRP2P258504_rs9179747 | 58173764 | A | 0   | 0.4286 | G |
| 18 | BICF2P266364            | 58178500 | G | 0.5 | 0.2143 | A |
| 18 | BICF2P7889              | 58192488 | A | 0.5 | 0.2143 | G |
| 18 | BICF2P6243              | 58207649 | A | 0.5 | 0.6429 | G |
| 18 | BICF2P351560            | 58221251 | C | 0.5 | 0.2143 | G |
| 18 | BICF2P355615            | 58230092 | A | 0.5 | 0.3571 | C |
| 18 | BICF2P705190            | 58244259 | 0 | 0   | 0      | G |
| 18 | TIGRP2P258537_rs9062620 | 58252470 | A | 0   | 0.4286 | G |
| 18 | BICF2P734749            | 58267142 | A | 0   | 0.4286 | G |
| 18 | BICF2P882295            | 58272514 | A | 0   | 0      | T |
| 18 | BICF2S23351269          | 58284048 | A | 0.5 | 0.2143 | G |

|    |                         |          |   |     |        |   |
|----|-------------------------|----------|---|-----|--------|---|
| 18 | BICF2P1339454           | 58295555 | A | 1   | 1      | G |
| 18 | BICF2P33326             | 58307152 | G | 0.5 | 0.2143 | A |
| 18 | BICF2P33327             | 58307608 | G | 0.5 | 0.6429 | A |
| 18 | BICF2P701996            | 58325498 | 0 | 0   | 0      | G |
| 18 | BICF2S23321363          | 58347294 | A | 0.5 | 0.2143 | G |
| 18 | BICF2S2291584           | 58351200 | T | 0.5 | 0.6429 | A |
| 18 | BICF2S23022069          | 58366044 | A | 1   | 0.5714 | G |
| 18 | TIGRP2P258609_rs9147935 | 58382785 | 0 | 0   | 0      | A |
| 18 | BICF2S23020195          | 58390038 | G | 0.5 | 0.2143 | A |
| 18 | BICF2P316934            | 58398939 | G | 1   | 1      | A |
| 18 | BICF2P179713            | 58431371 | A | 0   | 0      | G |
| 18 | BICF2P5847              | 58441786 | A | 0   | 0      | G |
| 18 | BICF2P1366439           | 58451090 | C | 0.5 | 0.7857 | A |
| 18 | BICF2P1153652           | 58468511 | G | 0.5 | 0.6667 | A |
| 18 | BICF2P148743            | 58471173 | A | 0.5 | 0.3571 | G |
| 18 | BICF2P509668            | 58496096 | G | 0.5 | 0.3571 | A |
| 18 | BICF2P166586            | 58507129 | G | 0   | 0      | A |
| 18 | BICF2S23623458          | 58529095 | A | 0.5 | 0.2143 | G |
| 18 | TIGRP2P258700_rs8957297 | 58540180 | G | 0.5 | 0.2143 | A |
| 18 | BICF2P826492            | 58553702 | A | 0   | 0      | G |
| 18 | BICF2S23635592          | 58566612 | C | 0   | 0      | A |
| 18 | BICF2P1276202           | 58593008 | 0 | 0   | 0      | G |
| 18 | BICF2P108867            | 58610472 | 0 | 0   | 0      | C |
| 18 | BICF2S23445765          | 58622059 | A | 0   | 0      | G |
| 18 | TIGRP2P258715_rs8879208 | 58643241 | T | 0   | 0      | A |
| 18 | BICF2P833626            | 58643816 | A | 0   | 0      | C |
| 18 | BICF2P1217592           | 58658218 | 0 | 0   | 0      | A |
| 18 | BICF2P898044            | 58684925 | 0 | 0   | 0      | A |
| 18 | BICF2S23151349          | 58706293 | A | 0.5 | 0.2143 | C |
| 18 | BICF2P1096044           | 58723172 | G | 0.5 | 0.2143 | A |
| 18 | BICF2S23534744          | 58746663 | A | 0   | 0      | C |
| 18 | BICF2S2449299           | 58768331 | C | 0.5 | 0.2143 | A |
| 18 | BICF2S23248136          | 58783256 | A | 0   | 0      | G |
| 18 | BICF2P370786            | 58789355 | G | 0.5 | 0.2143 | A |
| 18 | BICF2P533302            | 58808781 | A | 0.5 | 0.2143 | G |
| 18 | BICF2P488921            | 58824129 | A | 0.5 | 0.2143 | G |
| 18 | TIGRP2P258776_rs8520802 | 58852785 | 0 | 0   | 0      | T |
| 20 | BICF2G630227561         | 3006789  | 0 | 0   | 0      | G |
| 20 | BICF2G630227566         | 3019045  | A | 0   | 0      | G |
| 20 | BICF2G630227568         | 3033306  | A | 0   | 0      | C |
| 20 | BICF2G630227575         | 3070371  | A | NA  | 0.4286 | G |
| 20 | BICF2G630227582         | 3083859  | A | 0   | 0      | G |
| 20 | BICF2G630227587         | 3097730  | A | 0   | 0      | G |
| 20 | BICF2G630227595         | 3150100  | A | 0   | 0      | C |
| 20 | BICF2G630227596         | 3153594  | A | 0   | 0      | G |
| 20 | BICF2S23412999          | 3172477  | 0 | 0   | 0      | A |
| 20 | BICF2P952877            | 3192577  | 0 | 0   | 0      | G |

|    |                         |         |   |      |        |   |
|----|-------------------------|---------|---|------|--------|---|
| 20 | BICF2P195799            | 3207341 | 0 | 0    | 0      | G |
| 20 | BICF2P1357641           | 3226690 | 0 | 0    | 0      | A |
| 20 | BICF2G630227611         | 3241457 | A | 0    | 0      | G |
| 20 | BICF2P1159801           | 3285517 | 0 | 0    | 0      | G |
| 20 | BICF2G630227617         | 3297484 | A | 0    | 0      | G |
| 20 | BICF2P330669            | 3298368 | C | 0    | 0      | G |
| 20 | BICF2G630227622         | 3311778 | G | 0    | 0      | A |
| 20 | BICF2G630227626         | 3322256 | G | 0    | 0      | A |
| 20 | BICF2G630227631         | 3324517 | A | 0    | 0      | G |
| 20 | BICF2G630227650         | 3355321 | A | 0    | 0      | G |
| 20 | BICF2G630227651         | 3355411 | C | 0    | 0      | A |
| 20 | BICF2G630227655         | 3360807 | A | 0    | 0      | G |
| 20 | BICF2P578552            | 3403037 | 0 | 0    | 0      | A |
| 20 | BICF2G630227677         | 3415022 | A | 0    | 0      | G |
| 20 | BICF2G630227679         | 3420371 | T | 0    | 0      | A |
| 20 | BICF2G630227706         | 3458168 | A | 0    | 0      | G |
| 20 | BICF2G630227710         | 3465470 | G | 0    | 0      | A |
| 20 | BICF2G630227713         | 3466814 | G | 0    | 0      | A |
| 20 | BICF2P1155699           | 3508216 | 0 | 0    | 0      | A |
| 20 | BICF2P919863            | 3527488 | A | 0.75 | 0.7857 | C |
| 20 | BICF2P1023564           | 3541879 | 0 | 0    | 0      | A |
| 20 | BICF2P513687            | 3543379 | 0 | 0    | 0      | A |
| 20 | BICF2P792640            | 3581999 | T | 0    | 0      | A |
| 20 | TIGRP2P269432_rs9225506 | 3588831 | G | 0.75 | 0.6429 | A |
| 20 | BICF2P931377            | 3608842 | 0 | 0    | 0      | G |
| 20 | BICF2P1261942           | 3620369 | A | 0    | 0.1667 | G |
| 20 | TIGRP2P269437_rs9112022 | 3655505 | 0 | 0    | 0      | G |
| 20 | G1078f45S150            | 3697146 | G | 0    | 0      | A |
| 20 | BICF2S24511323          | 3711664 | A | 0    | 0      | G |
| 20 | BICF2P816146            | 3718247 | C | 0    | 0      | A |
| 20 | BICF2P1216373           | 3726823 | 0 | 0    | 0      | A |
| 20 | BICF2P1138591           | 3741397 | 0 | 0    | 0      | A |
| 20 | BICF2G630227720         | 3749923 | A | 0    | 0      | G |
| 20 | BICF2P1342718           | 3781995 | 0 | 0    | 0      | A |
| 20 | BICF2P1355388           | 3811374 | 0 | 0    | 0      | C |
| 20 | G1080f38S220            | 3885587 | 0 | 0    | 0      | A |
| 20 | G1080f41S108            | 3887718 | 0 | 0    | 0      | C |
| 20 | G1081f19S18             | 3936904 | 0 | 0    | 0      | C |
| 20 | TIGRP2P269441_rs8713981 | 3968991 | 0 | 0    | 0      | G |
| 20 | G1082f27S56             | 3979078 | 0 | 0    | 0      | A |
| 20 | BICF2G630227727         | 4001436 | A | 0    | 0      | G |
| 20 | G1083f40S38             | 4021234 | G | 0    | 0      | A |
| 20 | BICF2G630227728         | 4041565 | A | 0    | 0      | G |
| 20 | BICF2G630227729         | 4055624 | A | 0    | 0      | C |
| 20 | BICF2P470408            | 4093938 | 0 | 0    | 0      | G |
| 20 | BICF2P1422594           | 4112928 | A | 0.25 | 0.2143 | C |
| 20 | BICF2P85810             | 4119619 | 0 | 0    | 0      | A |

|    |                         |         |   |      |        |   |
|----|-------------------------|---------|---|------|--------|---|
| 20 | BICF2P1135482           | 4135729 | 0 | 0    | 0      | C |
| 20 | BICF2P315279            | 4142736 | 0 | 0    | 0      | C |
| 20 | BICF2S23158430          | 4154354 | A | 0    | 0      | G |
| 20 | BICF2P1344732           | 4172969 | 0 | 0    | 0      | A |
| 20 | BICF2P470470            | 4177692 | 0 | 0    | 0      | G |
| 20 | BICF2G630227731         | 4210368 | G | 0    | 0      | A |
| 20 | G1084f21S217            | 4259345 | 0 | 0    | 0      | C |
| 20 | BICF2P467715            | 4285897 | 0 | 0    | 0      | G |
| 20 | G1085f38S38             | 4311286 | 0 | 0    | 0      | G |
| 20 | BICF2P1192472           | 4338422 | 0 | 0    | 0      | G |
| 20 | BICF2G630227734         | 4348267 | G | 0    | 0      | A |
| 20 | BICF2P929453            | 4416093 | 0 | 0    | 0      | A |
| 20 | BICF2S239107            | 4437440 | 0 | 0    | 0      | G |
| 20 | BICF2P413583            | 4444511 | 0 | 0    | 0      | C |
| 20 | BICF2P1320836           | 4465530 | A | 0    | 0      | C |
| 20 | BICF2S23540807          | 4483913 | A | 0.25 | 0.2143 | G |
| 20 | BICF2P832815            | 4486810 | A | 0    | 0      | G |
| 20 | BICF2P221428            | 4534527 | A | 0    | 0      | G |
| 20 | BICF2P544127            | 4552089 | G | 0    | 0      | A |
| 20 | BICF2P631590            | 4573204 | G | 0    | 0      | A |
| 20 | BICF2G630227742         | 4577194 | A | 0    | 0      | G |
| 20 | TIGRP2P269457_rs8853850 | 4596802 | G | 0    | 0      | C |
| 20 | BICF2G630227746         | 4604217 | G | 0    | 0      | A |
| 20 | BICF2G630227748         | 4620996 | A | 0    | 0      | G |
| 20 | BICF2G630227749         | 4632430 | C | 0    | 0      | A |
| 20 | TIGRP2P269458_rs9197145 | 4645036 | G | 0    | 0      | A |
| 20 | BICF2G630227754         | 4658611 | A | 0    | 0      | G |
| 20 | TIGRP2P269460_rs8552203 | 4695037 | G | 0    | 0      | A |
| 20 | BICF2P1462680           | 4698549 | A | 0    | 0      | C |
| 20 | BICF2P962246            | 4726911 | G | 0    | 0      | A |
| 20 | BICF2P962255            | 4730687 | G | 0    | 0      | A |
| 20 | BICF2P778428            | 4738168 | G | 0    | 0      | A |
| 20 | BICF2P715020            | 4753672 | A | 0    | 0      | G |
| 20 | TIGRP2P269497_rs9048356 | 4758631 | G | 0.5  | 0.4286 | A |
| 20 | BICF2G630227766         | 4772806 | C | 0    | 0      | G |
| 20 | BICF2G630227767         | 4791063 | A | 1    | 1      | G |
| 20 | BICF2P1438338           | 4803249 | G | 0    | 0      | A |
| 20 | BICF2G630227769         | 4808853 | G | 0    | 0      | A |
| 20 | BICF2P1014964           | 4824556 | 0 | 0    | 0      | G |
| 20 | BICF2P1369547           | 4834874 | 0 | 0    | 0      | G |
| 20 | BICF2G630227770         | 4845023 | A | 0    | 0      | G |
| 20 | BICF2G630227771         | 4854057 | G | 0    | 0      | A |
| 20 | BICF2G630227773         | 4871821 | C | 0    | 0      | A |
| 20 | BICF2P944292            | 4876571 | 0 | 0    | 0      | C |
| 20 | BICF2P611769            | 4899962 | 0 | 0    | 0      | A |
| 20 | BICF2G630227777         | 4915189 | A | 0    | 0      | G |
| 20 | TIGRP2P269508_rs8722779 | 4961200 | 0 | NA   | 0      | G |

|    |                         |         |   |     |        |   |
|----|-------------------------|---------|---|-----|--------|---|
| 20 | BICF2P1228677           | 4969947 | 0 | 0   | 0      | C |
| 20 | BICF2P446254            | 5007555 | A | 1   | 1      | G |
| 20 | G1088f42S254            | 5059646 | 0 | 0   | 0      | G |
| 20 | BICF2S23157078          | 5083773 | G | 0   | 0      | A |
| 20 | BICF2G630227781         | 5126962 | A | 0   | 0      | G |
| 20 | BICF2P34290             | 5142240 | 0 | 0   | 0      | A |
| 20 | BICF2P1254094           | 5172398 | 0 | 0   | 0      | C |
| 20 | BICF2G630227788         | 5183347 | A | 0   | 0      | G |
| 20 | BICF2P1092184           | 5211914 | 0 | 0   | 0      | A |
| 20 | BICF2P816959            | 5222117 | 0 | 0   | 0      | G |
| 20 | BICF2P1421680           | 5237820 | 0 | 0   | 0      | T |
| 20 | BICF2G630227791         | 5252841 | 0 | 0   | 0      | G |
| 20 | BICF2P772552            | 5276181 | A | 0   | 0      | G |
| 20 | BICF2P1344384           | 5278800 | C | 0   | 0      | G |
| 20 | BICF2G630227795         | 5294615 | G | 0   | 0      | A |
| 20 | BICF2P529880            | 5308330 | A | 0   | 0      | G |
| 20 | BICF2G630227798         | 5328332 | C | 0   | 0      | G |
| 20 | TIGRP2P275744_rs8523253 | 5336448 | C | 0   | 0      | A |
| 20 | BICF2P1286758           | 5357129 | 0 | 0   | 0      | C |
| 20 | BICF2G630227801         | 5367665 | A | 0   | 0      | G |
| 20 | BICF2P1374643           | 5373525 | 0 | 0   | 0      | G |
| 20 | BICF2G630227803         | 5404850 | G | 0   | 0      | A |
| 20 | BICF2G630227804         | 5409204 | A | 0   | 0      | G |
| 20 | TIGRP2P275745_rs9029713 | 5428157 | 0 | 0   | 0      | C |
| 20 | BICF2P1377724           | 5460065 | G | 0   | 0      | A |
| 20 | BICF2G630227810         | 5472180 | A | 0   | 0      | G |
| 20 | BICF2P555892            | 5479721 | 0 | 0   | 0      | C |
| 20 | BICF2G630227811         | 5486953 | 0 | 0   | 0      | G |
| 20 | TIGRP2P275750_rs8670163 | 5524454 | 0 | 0   | 0      | A |
| 20 | BICF2P463992            | 5549654 | G | 0   | 0      | A |
| 20 | BICF2G630227820         | 5576036 | A | 0   | 0      | G |
| 20 | BICF2G630227822         | 5577957 | A | 0   | 0      | G |
| 20 | BICF2G630227836         | 5591893 | G | 0   | 0      | A |
| 20 | BICF2G630227844         | 5602812 | A | 0   | 0      | G |
| 20 | BICF2P709779            | 5664359 | 0 | 0   | 0      | T |
| 20 | BICF2G630227874         | 5687113 | G | 0   | 0      | A |
| 20 | BICF2G630227898         | 5707575 | A | 0.5 | 0.4286 | G |
| 20 | BICF2G630227914         | 5720949 | G | 0.5 | 0.4286 | A |
| 20 | BICF2P527689            | 5738027 | G | 0.5 | 0.4286 | A |
| 20 | BICF2G630227933         | 5741533 | A | 0.5 | 0.4286 | G |
| 20 | BICF2G630227941         | 5752627 | A | 0.5 | 0.4286 | G |
| 20 | BICF2G630227962         | 5770600 | A | 0   | 0      | G |
| 20 | BICF2G630227965         | 5771454 | A | 0.5 | 0.4286 | G |
| 20 | BICF2G630227973         | 5779740 | A | 0.5 | 0.4286 | G |
| 20 | BICF2G630227985         | 5790816 | G | 0.5 | 0.4286 | A |
| 20 | BICF2P615547            | 5799187 | A | 0.5 | 0.4286 | G |
| 20 | TIGRP2P275770_rs8586176 | 5811579 | C | 0.5 | 0.4286 | A |

|    |                         |         |   |      |        |   |
|----|-------------------------|---------|---|------|--------|---|
| 20 | BICF2G630227993         | 5827700 | G | 0.5  | 0.4    | A |
| 20 | BICF2P1460544           | 5840155 | G | 0.5  | 0.4286 | A |
| 20 | BICF2P1460543           | 5842085 | 0 | 0    | 0      | G |
| 20 | BICF2G630227999         | 5854714 | G | 0.5  | 0.4286 | A |
| 20 | BICF2P818984            | 5868934 | G | 0.5  | 0.4286 | A |
| 20 | BICF2P744506            | 5884412 | G | 0.5  | 0.4286 | A |
| 20 | BICF2P1293055           | 5891628 | G | 0.5  | 0.4286 | C |
| 20 | BICF2P282727            | 5900097 | A | 0    | 0      | G |
| 20 | BICF2P571273            | 5919676 | G | 0.5  | 0.4286 | C |
| 20 | BICF2P341888            | 5942535 | A | 0.5  | 0.4286 | G |
| 20 | BICF2P313676            | 5950183 | A | 0.5  | 0.4286 | G |
| 20 | TIGRP2P275794_rs8776111 | 5975071 | A | 0    | 0      | G |
| 20 | BICF2P107162            | 5983854 | 0 | 0    | 0      | G |
| 20 | BICF2P725743            | 5997774 | C | 0    | 0      | G |
| 20 | BICF2P496447            | 6010790 | G | 0.5  | 0.4286 | A |
| 20 | BICF2G630228004         | 6022760 | A | 0.5  | 0.4286 | T |
| 20 | BICF2P80282             | 6035918 | A | 0    | 0      | G |
| 20 | BICF2P1406873           | 6067898 | G | 0.5  | 0.4    | A |
| 20 | BICF2P511692            | 6078437 | T | 0.5  | 0.4286 | A |
| 20 | BICF2P1052452           | 6084656 | G | 0.5  | 0.4286 | A |
| 20 | TIGRP2P275831_rs8855967 | 6106239 | G | 0    | 0      | A |
| 20 | BICF2P1331506           | 6107800 | A | 0    | 0      | G |
| 20 | BICF2P1129369           | 6118349 | G | 0    | 0      | C |
| 20 | BICF2S23427263          | 6118464 | A | 0    | 0      | G |
| 20 | BICF2P1070764           | 6153722 | A | 0    | 0      | G |
| 20 | BICF2S23034921          | 6172776 | G | 0    | 0      | A |
| 20 | TIGRP2P275848_rs8650589 | 6178075 | G | 0    | 0      | A |
| 20 | BICF2P1005690           | 6187067 | A | 0    | 0      | G |
| 20 | BICF2P1271255           | 6225539 | A | 0    | 0      | G |
| 20 | BICF2P318715            | 6235557 | 0 | 0    | 0      | G |
| 20 | BICF2P1340865           | 6251757 | 0 | 0    | 0      | A |
| 20 | BICF2P1027151           | 6264054 | G | 0.25 | 0.3571 | A |
| 20 | BICF2G630228026         | 6275479 | A | 0    | 0      | G |
| 20 | BICF2S23446360          | 6276287 | A | 0.75 | 0.6429 | G |
| 20 | BICF2S2336417           | 6290446 | A | 0.75 | 0.6429 | G |
| 20 | BICF2G630228053         | 6298046 | G | 0    | 0      | A |
| 20 | BICF2G630228060         | 6304592 | G | 0    | 0      | A |
| 20 | BICF2P389321            | 6324981 | A | 0.75 | 0.6667 | G |
| 20 | BICF2P1102636           | 6330593 | 0 | 0    | 0      | G |
| 20 | BICF2G630228076         | 6342366 | A | 0.25 | 0.3571 | G |
| 20 | BICF2G630228085         | 6348426 | A | 0.25 | 0.3571 | G |
| 20 | BICF2G630228112         | 6369741 | A | 0.25 | 0.3571 | G |
| 20 | BICF2P998983            | 6377880 | A | 0    | 0      | G |
| 20 | BICF2P1369712           | 6385743 | G | 0    | 0      | A |
| 20 | BICF2G630228118         | 6396914 | A | 0.5  | 0.5714 | G |
| 20 | BICF2P168936            | 6409234 | G | 0.25 | 0.2143 | A |
| 20 | BICF2G630228119         | 6418739 | 0 | 0    | 0      | G |



|    |                         |         |   |      |        |   |
|----|-------------------------|---------|---|------|--------|---|
| 20 | TIGRP2P275920_rs9084870 | 6430482 | A | 0.25 | 0.2143 | G |
| 20 | BICF2P180144            | 6447312 | A | 0.25 | 0.3571 | C |
| 20 | BICF2S23649047          | 6453408 | A | 0    | 0      | G |
| 20 | BICF2G630228134         | 6469204 | A | 0.25 | 0.3571 | G |
| 20 | TIGRP2P275933_rs9074210 | 6478523 | A | 0.75 | 0.6429 | G |
| 20 | BICF2P313347            | 6497275 | C | 0.25 | 0.3571 | A |
| 20 | BICF2S23040112          | 6507243 | A | 0.5  | 0.5714 | G |
| 20 | BICF2G630228214         | 6515124 | G | 0.5  | 0.5714 | A |
| 20 | BICF2G630228225         | 6522817 | A | 0.5  | 0.5714 | G |
| 20 | BICF2G630228234         | 6534212 | A | 0.5  | 0.5714 | C |
| 20 | BICF2S23553101          | 6534538 | A | 0.5  | 0.5714 | G |
| 20 | BICF2G630228244         | 6543412 | G | 0.5  | 0.5714 | A |
| 20 | BICF2G630228259         | 6550206 | G | 0.5  | 0.5714 | A |
| 20 | BICF2G630228281         | 6558595 | G | 0.5  | 0.5714 | A |
| 20 | BICF2G630228299         | 6573624 | A | 0    | 0      | G |
| 20 | BICF2G630228310         | 6579987 | A | 0.25 | 0.3571 | G |
| 20 | BICF2G630228320         | 6600160 | A | 0    | 0      | G |
| 20 | BICF2G630228324         | 6607131 | G | 0.75 | 0.7857 | A |
| 20 | BICF2G630228340         | 6621908 | A | 0    | 0      | G |
| 20 | BICF2G630228342         | 6625746 | A | 0    | 0      | G |
| 20 | BICF2G630228370         | 6643371 | G | 0    | 0      | A |
| 20 | BICF2P499986            | 6648402 | G | 0    | 0      | A |
| 20 | BICF2G630228427         | 6666342 | C | 0.75 | 0.7857 | A |
| 20 | BICF2P941641            | 6666640 | A | 0    | 0      | G |
| 20 | BICF2P1173729           | 6688227 | A | 0.75 | 0.7857 | G |
| 20 | BICF2G630228466         | 6688619 | G | 0.75 | 0.7857 | A |
| 20 | BICF2G630228481         | 6696980 | A | 0.75 | 0.7857 | G |
| 20 | BICF2P1347560           | 6705769 | A | 0    | 0      | T |
| 20 | TIGRP2P276000_rs8656466 | 6716146 | A | 0    | 0      | T |
| 20 | BICF2G630228532         | 6729029 | G | 1    | 1      | A |
| 20 | BICF2G630228547         | 6741084 | G | 0.25 | 0.3571 | A |
| 20 | BICF2P1458372           | 6759913 | G | 0.25 | 0.3571 | A |
| 20 | BICF2G630228578         | 6769293 | A | 0.25 | 0.3571 | G |
| 20 | BICF2G630228592         | 6776584 | G | 0.25 | 0.3571 | A |
| 20 | BICF2G630228608         | 6789959 | A | 0.25 | 0.3571 | G |
| 20 | BICF2S23518579          | 6807884 | A | 0    | 0      | G |
| 20 | BICF2P628799            | 6809341 | A | 0.5  | 0.4286 | G |
| 20 | BICF2G630228616         | 6814921 | G | 0    | 0      | A |
| 20 | BICF2P55340             | 6826802 | C | 0.25 | 0.3571 | A |
| 20 | BICF2G630228625         | 6836933 | A | 0.25 | 0.3571 | G |
| 20 | BICF2P189777            | 6846726 | 0 | 0    | 0      | T |
| 20 | BICF2S23351054          | 6855685 | A | 0.25 | 0.3571 | G |
| 20 | BICF2G630228657         | 6869504 | G | 0    | 0      | A |
| 20 | BICF2S23232298          | 6885822 | A | 0    | 0      | G |
| 20 | BICF2G630228707         | 6902509 | G | 0.25 | 0.3333 | A |
| 20 | BICF2G630228720         | 6909940 | C | 0.25 | 0.3571 | A |
| 20 | BICF2G630228726         | 6914358 | C | 0.25 | 0.3571 | A |

|    |                         |         |   |      |        |   |
|----|-------------------------|---------|---|------|--------|---|
| 20 | BICF2G630228750         | 6925861 | G | 0.25 | 0.3571 | A |
| 20 | BICF2G630228777         | 6940756 | A | 0.25 | 0.3571 | G |
| 20 | BICF2G630228795         | 6947570 | A | 0.25 | 0.3571 | G |
| 20 | TIGRP2P276067_rs8859090 | 6961456 | G | 0    | 0      | A |
| 20 | BICF2G630228811         | 6976684 | G | 0    | 0      | A |
| 20 | BICF2G630228829         | 6991667 | G | 0    | 0      | A |
| 20 | BICF2G630228832         | 6992953 | A | 0    | 0      | G |
| 20 | BICF2P175677            | 7014584 | A | 0    | 0      | C |
| 20 | BICF2G630228848         | 7015737 | A | 0    | 0      | G |
| 20 | BICF2G630228864         | 7037105 | G | 0    | 0      | A |
| 20 | BICF2G630228867         | 7041392 | A | 0    | 0      | C |
| 20 | TIGRP2P276099_rs9110110 | 7055870 | A | 0    | 0      | G |
| 20 | BICF2P182606            | 7060454 | A | 0    | 0      | G |
| 20 | BICF2G630228901         | 7071399 | G | 0.5  | 0.4286 | A |
| 20 | BICF2P933028            | 7081416 | C | 0    | 0      | A |
| 20 | BICF2G630228913         | 7084244 | A | 0    | 0      | C |
| 20 | TIGRP2P276110_rs9159326 | 7096811 | A | 0    | 0      | G |
| 20 | BICF2G630228932         | 7108246 | A | 0    | 0      | C |
| 20 | BICF2G630228939         | 7119606 | A | 0    | 0      | G |
| 20 | BICF2P852117            | 7135637 | G | 0    | 0      | A |
| 20 | BICF2G630228948         | 7141076 | G | 0    | 0      | A |
| 20 | BICF2S23733247          | 7147070 | A | 0    | 0      | G |
| 20 | BICF2S23733491          | 7147599 | A | 0    | 0      | G |
| 20 | BICF2P604572            | 7153874 | A | 0    | 0      | G |
| 20 | TIGRP2P276170_rs9226313 | 7172001 | A | 0    | 0      | G |
| 20 | BICF2P529787            | 7199539 | A | 0    | 0      | G |
| 20 | BICF2P1386951           | 7223170 | G | 0    | 0      | A |
| 20 | BICF2P18738             | 7235569 | A | 0    | 0      | C |
| 20 | BICF2P111469            | 7255983 | T | 0    | 0      | A |
| 20 | BICF2P263170            | 7280460 | G | 0    | 0      | A |
| 20 | BICF2S22964247          | 7293276 | A | 0    | 0      | T |
| 20 | BICF2P486272            | 7313644 | G | 0    | 0      | A |
| 20 | TIGRP2P276217_rs9189552 | 7317747 | A | 0    | 0      | G |
| 20 | BICF2P1396327           | 7326001 | G | 0    | 0      | A |
| 20 | BICF2S23236462          | 7351321 | G | 0    | 0      | A |
| 20 | BICF2S23745860          | 7360939 | A | 0    | 0      | C |
| 20 | TIGRP2P276240_rs8841370 | 7372780 | A | 0    | 0      | G |
| 20 | TIGRP2P276249_rs9191798 | 7383736 | A | 0    | 0      | C |
| 20 | TIGRP2P276260_rs8614098 | 7395503 | A | 0    | 0      | G |
| 20 | BICF2G630228962         | 7410709 | A | 0    | 0      | G |
| 20 | BICF2S23020248          | 7424087 | C | 0.25 | 0      | A |
| 20 | BICF2P29477             | 7432997 | G | 0    | 0      | A |
| 20 | BICF2P433012            | 7442495 | G | 0    | 0      | A |
| 20 | BICF2P15788             | 7459920 | A | 0    | 0      | C |
| 20 | TIGRP2P276286_rs8991096 | 7469221 | G | 0    | 0      | A |
| 20 | TIGRP2P276298_rs9139393 | 7485514 | A | 0    | 0      | G |
| 20 | BICF2P627952            | 7497564 | C | 0    | 0      | A |

|    |                         |         |   |      |        |   |
|----|-------------------------|---------|---|------|--------|---|
| 20 | TIGRP2P276309_rs9127977 | 7501492 | A | 0    | 0      | G |
| 20 | TIGRP2P276321_rs9193390 | 7510638 | A | 0    | 0      | G |
| 20 | TIGRP2P276324_rs8856022 | 7523512 | 0 | 0    | 0      | C |
| 20 | BICF2P679704            | 7538446 | G | 0    | 0      | A |
| 20 | TIGRP2P276330_rs9017463 | 7545824 | 0 | 0    | 0      | C |
| 20 | BICF2S23346857          | 7574757 | A | 0    | 0      | G |
| 20 | BICF2G630228966         | 7579714 | A | 0    | 0      | G |
| 20 | BICF2G630228967         | 7600215 | A | 0    | 0      | C |
| 20 | BICF2P275247            | 7605050 | 0 | 0    | 0      | C |
| 20 | BICF2P668051            | 7620343 | 0 | 0    | 0      | A |
| 20 | BICF2G630228968         | 7625133 | A | 0    | 0      | G |
| 20 | BICF2P808755            | 7645144 | A | 0.5  | 0.5714 | G |
| 20 | BICF2P50242             | 7653064 | A | 0    | 0      | G |
| 20 | TIGRP2P276348_rs8622130 | 7668172 | A | 0    | 0      | G |
| 20 | BICF2P901522            | 7672975 | A | 0.5  | 0.4286 | G |
| 20 | BICF2S23159313          | 7683868 | G | 0.5  | 0.4286 | A |
| 20 | BICF2S23450841          | 7715740 | A | 0.5  | 0.4286 | G |
| 20 | BICF2S22944990          | 7717715 | G | 0.5  | 0.4286 | A |
| 20 | TIGRP2P276375_rs8673354 | 7736877 | A | 0.5  | 0.4286 | G |
| 20 | BICF2P265279            | 7744486 | G | 0.5  | 0.4286 | A |
| 20 | BICF2P1333063           | 7753276 | C | 0    | 0      | G |
| 20 | BICF2P1442901           | 7784359 | A | 0    | 0      | G |
| 20 | BICF2S23145573          | 7793059 | G | 0.5  | 0.4286 | A |
| 20 | BICF2G630228971         | 7816139 | A | 0    | 0      | G |
| 20 | BICF2G630228972         | 7832623 | A | 0.25 | 0.2143 | G |
| 20 | BICF2P1233701           | 7854113 | A | 0    | 0      | C |
| 20 | BICF2S23138230          | 7856491 | A | 1    | 1      | G |
| 20 | BICF2S23433805          | 7875202 | A | 0    | 0      | G |
| 20 | BICF2P482761            | 7880206 | A | 0    | 0      | G |
| 20 | BICF2P65561             | 7897228 | G | 0    | 0      | A |
| 20 | BICF2P392966            | 7904080 | G | 0    | 0      | A |
| 20 | BICF2P479175            | 7908281 | A | 0    | 0      | G |
| 20 | BICF2S23752151          | 7914166 | C | 0    | 0      | A |
| 20 | TIGRP2P276404_rs8981765 | 7927900 | G | 0    | 0      | A |
| 20 | BICF2P1464798           | 7936048 | T | 0.75 | 0.7857 | A |
| 20 | BICF2P1216272           | 7946605 | G | 0    | 0      | A |
| 20 | BICF2P1242983           | 7969047 | A | 0    | 0      | G |
| 20 | BICF2P986417            | 7970058 | A | 0    | 0      | G |
| 20 | BICF2P769766            | 7998532 | G | 0    | 0      | A |
| 20 | BICF2P916907            | 8025745 | A | 0.75 | 0.7857 | G |
| 20 | BICF2P541994            | 8033260 | A | 0.75 | 0.7857 | G |
| 20 | BICF2P656590            | 8039634 | G | 0.75 | 0.7857 | A |
| 20 | TIGRP2P276447_rs8986680 | 8051836 | 0 | 0    | 0      | A |
| 20 | BICF2P394273            | 8062542 | G | 0    | 0      | A |
| 20 | BICF2P826727            | 8077974 | A | 0    | 0      | G |
| 20 | BICF2P1046461           | 8084567 | A | 0    | 0      | G |
| 20 | BICF2P582668            | 8101163 | A | 0    | 0      | G |

|    |                         |         |   |      |        |   |
|----|-------------------------|---------|---|------|--------|---|
| 20 | BICF2P1013704           | 8111599 | A | 0    | 0      | G |
| 20 | TIGRP2P276476_rs8757794 | 8123970 | A | 0    | 0      | G |
| 20 | BICF2P765442            | 8133414 | A | 0    | 0      | G |
| 20 | BICF2P1242532           | 8147201 | G | 0    | 0      | A |
| 20 | BICF2P277740            | 8162424 | A | 0    | 0      | C |
| 20 | BICF2G630228983         | 8187137 | A | 0    | 0      | G |
| 20 | BICF2P839110            | 8191645 | A | 0    | 0      | T |
| 20 | BICF2S23320304          | 8198107 | G | 0.25 | 0.3571 | A |
| 20 | TIGRP2P276497_rs9203172 | 8199990 | G | 0.25 | 0.3571 | A |
| 20 | BICF2P1268356           | 8219143 | A | 0.25 | 0.3571 | G |
| 20 | BICF2P1203817           | 8225326 | G | 0    | 0      | A |
| 20 | BICF2P1355736           | 8242118 | A | 0.25 | 0.3571 | G |
| 20 | BICF2P758244            | 8245613 | A | 0.25 | 0.3571 | G |
| 20 | TIGRP2P276529_rs8891639 | 8251132 | A | 0.25 | 0.3571 | G |
| 20 | TIGRP2P276536_rs8794050 | 8263292 | A | 0    | 0.3571 | G |
| 20 | TIGRP2P276538_rs9154188 | 8272630 | G | 0    | 0      | A |
| 20 | BICF2P695342            | 8290467 | C | 0    | 0      | A |
| 20 | BICF2P905674            | 8341586 | 0 | 0    | 0      | A |
| 20 | BICF2P532867            | 8352109 | A | 0    | 0      | G |
| 20 | BICF2P897751            | 8367411 | T | 0.25 | 0.3571 | A |
| 20 | BICF2P345617            | 8378464 | A | 0.25 | 0.3571 | C |
| 20 | BICF2P889015            | 8393491 | 0 | 0    | 0      | A |
| 20 | BICF2P869844            | 8410698 | 0 | 0    | 0      | G |
| 20 | BICF2P218354            | 8422811 | A | 0.25 | 0.3571 | G |
| 20 | BICF2P665957            | 8488132 | 0 | 0    | 0      | C |
| 20 | BICF2G630228990         | 8500548 | A | 0    | 0      | G |
| 20 | BICF2P586514            | 8514765 | 0 | 0    | 0      | T |
| 20 | BICF2P921951            | 8527739 | 0 | 0    | 0      | A |
| 20 | TIGRP2P276558_rs9020071 | 8534831 | A | 0    | 0      | G |
| 20 | BICF2P355347            | 8545995 | 0 | 0    | 0      | C |
| 20 | BICF2P1048232           | 8560807 | A | 0    | 0      | G |
| 20 | BICF2P780698            | 8570295 | G | 0    | 0      | A |
| 20 | BICF2P1120781           | 8575040 | G | 0    | 0      | A |
| 20 | BICF2P257934            | 8584802 | G | 0    | 0      | A |
| 20 | TIGRP2P276576_rs8804848 | 8594114 | A | 0    | 0      | G |
| 20 | BICF2G630228996         | 8615426 | G | 0.75 | 0.6429 | A |
| 20 | BICF2P1338138           | 8635017 | A | 0.75 | 0.6429 | G |
| 20 | BICF2G630229003         | 8638174 | A | 0.75 | 0.6429 | C |
| 20 | BICF2G630229010         | 8657973 | 0 | 0    | 0      | A |
| 20 | TIGRP2P276583_rs8662830 | 8665085 | 0 | 0    | 0      | T |
| 20 | BICF2G630229013         | 8671065 | A | 0.75 | 0.6429 | G |
| 20 | BICF2G630229016         | 8689149 | 0 | 0    | 0      | A |
| 20 | BICF2P1080603           | 8701157 | A | 0    | 0      | G |
| 20 | BICF2P888902            | 8719501 | G | 0.75 | 0.6429 | A |
| 20 | BICF2P1237466           | 8730372 | G | 0.25 | 0.3571 | A |
| 20 | BICF2G630229026         | 8756234 | A | 1    | 0.6667 | G |
| 20 | BICF2G630229034         | 8768588 | G | 0.25 | 0.3571 | A |

|    |                         |         |   |      |        |   |
|----|-------------------------|---------|---|------|--------|---|
| 20 | BICF2G630229040         | 8775256 | G | 0    | 0      | A |
| 20 | BICF2P925779            | 8794669 | G | 1    | 1      | A |
| 20 | BICF2G630229059         | 8808493 | 0 | 0    | 0      | G |
| 20 | BICF2P501161            | 8812001 | 0 | 0    | 0      | G |
| 20 | TIGRP2P276612_rs9245148 | 8825756 | A | 0.5  | 0.5714 | C |
| 20 | BICF2P595185            | 8840361 | A | 0    | 0      | G |
| 20 | BICF2P732063            | 8850377 | G | 0.5  | 0.4286 | C |
| 20 | TIGRP2P276627_rs8599867 | 8855594 | A | 0    | 0      | G |
| 20 | TIGRP2P276629_rs9110817 | 8866731 | A | 0.5  | 0.4286 | G |
| 20 | BICF2P288181            | 8886338 | G | 0.75 | 0.7857 | A |
| 20 | BICF2S22912836          | 8910002 | G | 0.25 | 0.3333 | A |
| 20 | BICF2P1431678           | 8916136 | A | 0.75 | 0.7857 | G |
| 20 | BICF2S23438196          | 8956396 | A | 0.25 | 0.3571 | C |
| 20 | BICF2S2343613           | 8961994 | A | 0.25 | 0.3571 | G |
| 20 | BICF2P913085            | 8979630 | A | 0.5  | 0.4286 | G |
| 20 | BICF2P832743            | 8999826 | A | 0.5  | 0.4286 | G |
| 20 | TIGRP2P276650_rs8747883 | 9005820 | G | 0    | 0      | A |
| 20 | BICF2P1136919           | 9034508 | A | 0    | 0      | G |
| 20 | BICF2S22910736          | 9050261 | G | 0    | 0      | A |
| 20 | BICF2P303083            | 9056037 | A | 0    | 0      | C |
| 20 | BICF2P1456588           | 9071630 | G | 0    | 0      | A |
| 20 | BICF2P1384557           | 9081237 | G | 0    | 0      | A |
| 20 | BICF2P1242669           | 9084868 | G | 0    | 0      | A |
| 20 | TIGRP2P276669_rs8877467 | 9103606 | A | 0    | 0      | C |
| 20 | BICF2P1202577           | 9112266 | T | 0    | 0      | A |
| 20 | BICF2P1380449           | 9117281 | A | 0    | 0      | C |
| 20 | BICF2S23645283          | 9121537 | A | 0    | 0      | G |
| 20 | BICF2P944676            | 9135611 | C | 0    | 0      | A |
| 20 | TIGRP2P276690_rs9130470 | 9152525 | G | 0    | 0      | A |
| 20 | TIGRP2P276691_rs8944179 | 9156340 | 0 | 0    | 0      | A |
| 20 | BICF2P562355            | 9174892 | 0 | 0    | 0      | C |
| 20 | BICF2P319161            | 9192863 | A | 0    | 0      | G |
| 20 | BICF2P557368            | 9213048 | G | 1    | 1      | A |
| 20 | BICF2P814167            | 9229496 | 0 | 0    | 0      | G |
| 20 | BICF2P1231992           | 9245644 | G | 1    | 1      | A |
| 20 | BICF2P808291            | 9249790 | 0 | 0    | 0      | A |
| 20 | BICF2G630229065         | 9263558 | G | 0    | 0      | A |
| 20 | BICF2P217408            | 9280087 | C | 0.5  | 0.5714 | A |
| 20 | TIGRP2P276706_rs9107425 | 9296444 | G | 0.5  | 0.4286 | A |
| 20 | BICF2P510818            | 9321378 | G | 0    | 0      | A |
| 20 | BICF2S23732523          | 9334188 | G | NA   | 0.625  | A |
| 20 | TIGRP2P276717_rs8952469 | 9358082 | C | NA   | 0.4167 | A |
| 20 | BICF2P1291631           | 9361919 | G | 0.5  | 0.4286 | A |
| 20 | TIGRP2P276718_rs8840720 | 9376830 | 0 | 0    | 0      | A |
| 20 | BICF2P793191            | 9402311 | 0 | 0    | 0      | C |
| 20 | BICF2P1361830           | 9416998 | A | 0    | 0      | G |
| 20 | BICF2P626478            | 9445331 | 0 | 0    | 0      | C |

|    |                         |          |   |      |        |   |
|----|-------------------------|----------|---|------|--------|---|
| 20 | BICF2P63891             | 9482197  | 0 | 0    | 0      | T |
| 20 | BICF2G630229066         | 9497261  | A | 0.5  | 0.3333 | G |
| 20 | BICF2P454409            | 9502692  | G | 0    | 0      | A |
| 20 | TIGRP2P276737_rs9229046 | 9569840  | 0 | 0    | 0      | A |
| 20 | BICF2P884643            | 9588030  | G | 0.25 | 0.3571 | A |
| 20 | TIGRP2P276738_rs8576432 | 9596073  | G | 0    | 0      | A |
| 20 | BICF2G630229069         | 9604858  | G | 0.5  | 0.4167 | A |
| 20 | BICF2P808006            | 9622149  | A | 0    | 0      | G |
| 20 | BICF2P768038            | 9622604  | A | 0    | 0      | G |
| 20 | BICF2P724725            | 9633752  | A | 0    | 0      | C |
| 20 | BICF2P17376             | 9648113  | G | 0.25 | 0.3571 | A |
| 20 | BICF2G630229071         | 9655507  | G | 0.25 | 0.2143 | A |
| 20 | BICF2P644               | 9662061  | G | 0.25 | 0.2143 | A |
| 20 | BICF2G630229118         | 9670313  | G | 0.25 | 0.2143 | A |
| 20 | BICF2G630229120         | 9672016  | G | 0.25 | 0.1    | A |
| 20 | BICF2G630229151         | 9683861  | A | 0.25 | 0.2143 | G |
| 20 | BICF2G630229178         | 9695121  | A | 0.25 | 0.2143 | T |
| 20 | BICF2G630229191         | 9711094  | A | 0.5  | 0.5714 | G |
| 20 | BICF2G630229195         | 9718889  | A | 1    | 0.8333 | C |
| 20 | BICF2G630229226         | 9729615  | A | 0    | 0      | G |
| 20 | BICF2S23435805          | 9743427  | G | 0.75 | 0.7857 | A |
| 20 | BICF2G630229252         | 9752122  | A | 0.75 | 0.7857 | G |
| 20 | BICF2S23317599          | 9752207  | A | 0    | 0      | G |
| 20 | BICF2G630229265         | 9764482  | A | 0.5  | 0.4286 | G |
| 20 | BICF2S23214834          | 9783149  | G | 0.75 | 0.7857 | A |
| 20 | BICF2G630229302         | 9793052  | A | 0.25 | 0.3571 | G |
| 20 | BICF2G630229314         | 9804482  | A | 0.5  | 0.4286 | C |
| 20 | BICF2G630229332         | 9818131  | C | 0.25 | 0.3571 | G |
| 20 | BICF2G630229341         | 9828443  | A | 0.25 | 0.3571 | G |
| 20 | BICF2G630229346         | 9834931  | G | 0    | 0      | A |
| 20 | BICF2G630229354         | 9844816  | A | 0.5  | 0.3571 | G |
| 20 | BICF2G630229359         | 9856616  | A | 0.25 | 0.2143 | G |
| 20 | BICF2P668509            | 9878052  | C | 0.25 | 0.2143 | A |
| 20 | BICF2P1281469           | 9885281  | G | 0    | 0      | A |
| 20 | BICF2P593931            | 9890102  | 0 | 0    | 0      | G |
| 20 | BICF2P86980             | 9903776  | A | 0.5  | 0.6429 | G |
| 20 | TIGRP2P276812_rs8762050 | 9914962  | 0 | 0    | 0      | G |
| 20 | BICF2S23315811          | 9928845  | G | 0.25 | 0.2143 | A |
| 20 | BICF2P1306786           | 9940434  | A | 0.75 | 0.7857 | G |
| 20 | BICF2P18501             | 9951671  | G | 0.25 | 0.2143 | A |
| 20 | BICF2P1094598           | 9959282  | A | 0.25 | 0.2143 | G |
| 20 | BICF2P747272            | 9986649  | A | 0.25 | 0.2143 | G |
| 20 | BICF2P1204356           | 9996635  | A | 0    | 0      | G |
| 20 | BICF2S23415860          | 10011815 | A | 0.25 | 0.2143 | C |
| 20 | BICF2P1295005           | 10019817 | A | 0.25 | 0.2143 | C |
| 20 | BICF2S2394822           | 10033386 | G | 0.25 | 0.2143 | A |
| 20 | BICF2P1318000           | 10046817 | G | 0.25 | 0.2143 | A |

|    |                         |          |   |      |        |   |
|----|-------------------------|----------|---|------|--------|---|
| 20 | BICF2P666959            | 10061363 | A | 0.25 | 0.2143 | G |
| 20 | BICF2S23056972          | 10064524 | G | 0.25 | 0.2143 | A |
| 20 | BICF2P488488            | 10078144 | 0 | 0    | 0      | A |
| 20 | BICF2P935380            | 10099327 | 0 | 0    | 0      | A |
| 20 | TIGRP2P276878_rs9163174 | 10109295 | T | 0.25 | 0.2143 | A |
| 20 | BICF2P38254             | 10122795 | A | 0.25 | 0.2143 | G |
| 20 | BICF2P371491            | 10131791 | A | 0    | 0      | G |
| 20 | BICF2P1027315           | 10163503 | G | 0.25 | 0.2143 | A |
| 20 | BICF2P914009            | 10167551 | G | 0.5  | 0.3571 | A |
| 20 | BICF2P1207224           | 10177916 | G | 0.5  | 0.3571 | A |
| 20 | BICF2P1027886           | 10194109 | A | 0.5  | 0.3571 | G |
| 20 | BICF2P1219295           | 10201025 | A | 0.5  | 0.3571 | G |
| 20 | BICF2P830050            | 10219126 | C | 0.25 | 0.2143 | A |
| 20 | BICF2P373670            | 10226178 | A | 0.5  | 0.6429 | G |
| 20 | BICF2S23721001          | 10267445 | A | 0    | 0      | G |
| 20 | BICF2S23550511          | 10276617 | A | 0.5  | 0.3571 | G |
| 20 | BICF2P213985            | 10291806 | G | 0.25 | 0.1429 | A |
| 20 | BICF2P156521            | 10314114 | G | 0.25 | 0.1429 | A |
| 20 | TIGRP2P269569_rs8795389 | 10317258 | A | 0.25 | 0.1429 | C |
| 20 | BICF2P669708            | 10327833 | G | 0    | 0      | A |
| 20 | BICF2P602234            | 10346460 | A | 0.25 | 0.2143 | G |
| 20 | TIGRP2P269585_rs9040849 | 10356421 | 0 | 0    | 0      | A |
| 20 | BICF2P534567            | 10366612 | A | 0.25 | 0.2143 | C |
| 20 | BICF2P725006            | 10381381 | A | 0.5  | 0.3571 | G |
| 20 | BICF2P1138745           | 10387556 | G | 0.25 | 0.1429 | A |
| 20 | BICF2P496330            | 10396309 | G | 0    | 0      | A |
| 20 | BICF2P496328            | 10397434 | G | 0.75 | 0.8571 | A |
| 20 | BICF2P163672            | 10411478 | G | 0.75 | 0.8571 | A |
| 20 | BICF2S23641416          | 10415597 | A | 0.75 | 0.8571 | C |
| 20 | TIGRP2P269628_rs8583243 | 10419989 | G | 1    | 0.8571 | A |
| 20 | BICF2S23723779          | 10430753 | A | 0.75 | 0.7857 | G |
| 20 | BICF2S23045197          | 10446198 | G | 0.5  | 0.6429 | A |
| 20 | TIGRP2P269638_rs9001474 | 10457757 | 0 | 0    | 0      | A |
| 20 | BICF2P707949            | 10465517 | A | 0.75 | 0.7857 | G |
| 20 | BICF2P1286971           | 10469494 | G | 0.75 | 0.7857 | A |
| 20 | BICF2P1078802           | 10474377 | A | 0.75 | 0.7857 | G |
| 20 | BICF2S23712145          | 10478031 | A | 0.5  | 0.6429 | G |
| 20 | BICF2P143638            | 10494510 | C | 0.5  | 0.6429 | A |
| 20 | BICF2P143640            | 10494721 | A | 0.5  | 0.6429 | G |
| 20 | BICF2P232140            | 10500676 | G | 0.75 | 0.7857 | A |
| 20 | BICF2P1429386           | 10512242 | A | 0.75 | 0.7857 | G |
| 20 | BICF2S22927980          | 10529976 | G | 0.75 | 0.7857 | A |
| 20 | BICF2P353380            | 10535759 | A | 0.75 | 0.7857 | G |
| 20 | BICF2P1064778           | 10565884 | C | 0.75 | 0.7857 | A |
| 20 | BICF2S23252493          | 10572634 | C | 0    | 0      | A |
| 20 | TIGRP2P269666_rs8775047 | 10592858 | 0 | 0    | 0      | A |
| 20 | BICF2S23255613          | 10605769 | G | 0.25 | 0.1429 | A |

|    |                         |          |   |      |        |   |
|----|-------------------------|----------|---|------|--------|---|
| 20 | BICF2P1122430           | 10615585 | A | 0    | 0      | G |
| 20 | BICF2P606536            | 10631467 | 0 | 0    | 0      | C |
| 20 | BICF2P926240            | 10645060 | A | 0.75 | 0.8571 | G |
| 20 | BICF2P630574            | 10650237 | G | 0.75 | 0.8571 | A |
| 20 | BICF2S2297464           | 10675063 | A | 0    | 0      | G |
| 20 | BICF2P981310            | 10708422 | C | 0    | 0      | A |
| 20 | BICF2P109096            | 10718862 | 0 | 0    | 0      | T |
| 20 | BICF2S2298593           | 10752376 | G | 0.25 | 0.1429 | A |
| 20 | BICF2P801946            | 10767515 | 0 | 0    | 0      | C |
| 20 | BICF2P1086455           | 10789036 | 0 | 0    | 0      | A |
| 20 | BICF2P316101            | 10800115 | 0 | 0    | 0      | A |
| 20 | TIGRP2P269683_rs8998812 | 10814211 | 0 | 0    | 0      | G |
| 20 | BICF2P971105            | 10837780 | G | 0.5  | 0.6429 | A |
| 20 | BICF2P538019            | 10855650 | A | 0.25 | 0.1429 | G |
| 20 | BICF2P1039680           | 10857437 | G | 0.25 | 0.1429 | A |
| 20 | BICF2P617608            | 10876680 | A | 0    | 0      | G |
| 20 | BICF2P748255            | 10886595 | A | 0    | 0      | G |
| 20 | BICF2P490910            | 10904922 | 0 | 0    | 0      | A |
| 20 | BICF2P717701            | 10921373 | A | 0.5  | 0.75   | G |
| 20 | BICF2P1269547           | 10935775 | G | 0.25 | 0.1429 | C |
| 20 | BICF2S23540401          | 10947317 | G | 0.25 | 0.2143 | A |
| 20 | BICF2P400731            | 10961667 | C | 0.25 | 0.1429 | A |
| 20 | TIGRP2P269703_rs9172232 | 10974469 | A | 0.25 | 0.1429 | G |
| 20 | BICF2P1128605           | 10986615 | A | 0    | 0      | G |
| 20 | BICF2P1132422           | 10994667 | G | 0.75 | 0.7857 | A |
| 20 | BICF2P1387850           | 11012418 | A | 0.25 | 0.1429 | G |
| 20 | BICF2P698923            | 11019536 | G | 0.5  | 0.6429 | A |
| 20 | TIGRP2P269730_rs8977233 | 11032090 | G | 0.5  | 0.6429 | A |
| 20 | BICF2P619270            | 11047524 | A | 0    | 0      | G |
| 20 | BICF2P1001214           | 11066621 | G | 0.5  | 0.6429 | A |
| 20 | BICF2P1471467           | 11078436 | A | 0.5  | 0.3571 | G |
| 20 | TIGRP2P269758_rs8952571 | 11105072 | A | 0    | 0      | G |
| 20 | BICF2P982983            | 11116222 | A | 0    | 0      | T |
| 20 | BICF2P275718            | 11126209 | G | 0    | 0      | A |
| 20 | BICF2S23235484          | 11137741 | A | 0    | 0      | G |
| 20 | BICF2S23543649          | 11147723 | A | 0.25 | 0.2143 | G |
| 20 | BICF2P1038092           | 11175961 | A | 0    | 0      | G |
| 20 | BICF2P1311457           | 11181100 | A | 0.5  | 0.6429 | G |
| 20 | BICF2P1384387           | 11191627 | A | 0.25 | 0.1429 | G |
| 20 | BICF2S23018264          | 11203239 | G | 0.25 | 0.1667 | A |
| 20 | BICF2P263426            | 11218479 | A | 0    | 0      | G |
| 20 | BICF2P363598            | 11241980 | 0 | 0    | 0      | A |
| 20 | BICF2P1073487           | 11251887 | A | 0.75 | 0.8571 | G |
| 20 | BICF2P475393            | 11279385 | A | 0.75 | 0.8571 | G |
| 20 | TIGRP2P269782_rs8594181 | 11290729 | 0 | 0    | 0      | A |
| 20 | BICF2P370801            | 11294164 | A | 0.25 | 0.1429 | G |
| 20 | BICF2P1209492           | 11307796 | A | 0.25 | 0.1429 | C |



|    |                         |          |   |      |        |   |
|----|-------------------------|----------|---|------|--------|---|
| 20 | BICF2P395752            | 11318548 | G | 0.25 | 0.1429 | A |
| 20 | BICF2P571340            | 11329177 | 0 | 0    | 0      | C |
| 20 | BICF2P634486            | 11347644 | G | 0.75 | 0.8571 | C |
| 20 | BICF2S23515569          | 11359163 | G | 0.25 | 0.2143 | A |
| 20 | BICF2P1197422           | 11369154 | A | 0    | 0      | G |
| 20 | BICF2S22960868          | 11375886 | G | 0.25 | 0.2143 | A |
| 20 | BICF2S2309142           | 11405969 | G | 0.5  | 0.3571 | A |
| 20 | BICF2S23055982          | 11418142 | A | 0.25 | 0.1429 | G |
| 20 | BICF2S2398347           | 11436329 | G | 0.25 | 0.1429 | A |
| 20 | BICF2P586292            | 11448343 | A | 0.25 | 0.1429 | G |
| 20 | BICF2P1405964           | 11458555 | A | 0.25 | 0.1429 | T |
| 20 | BICF2P982699            | 11467627 | A | 0.25 | 0.1429 | G |
| 20 | BICF2S23252274          | 11477746 | G | 0.25 | 0.2143 | A |
| 20 | BICF2P327842            | 11507035 | 0 | 0    | 0      | G |
| 20 | BICF2P277324            | 11523153 | A | 0.5  | 0.3571 | G |
| 20 | BICF2S23137740          | 11553879 | A | 0.5  | 0.3571 | C |
| 20 | BICF2S23656598          | 11565397 | G | 0.5  | 0.3571 | A |
| 20 | BICF2S23215649          | 11573085 | A | 0.5  | 0.3571 | G |
| 20 | BICF2P850819            | 11583712 | 0 | 0    | 0      | G |
| 20 | BICF2P988458            | 11593896 | A | 0.5  | 0.3571 | G |
| 20 | TIGRP2P269812_rs9107281 | 11646579 | 0 | 0    | 0      | C |
| 20 | BICF2P28494             | 11653829 | G | 0.25 | 0.1429 | A |
| 20 | TIGRP2P269816_rs9140233 | 11661697 | A | 0    | 0      | G |
| 20 | BICF2S2346832           | 11685813 | A | 0    | 0      | G |
| 20 | BICF2P135388            | 11697138 | C | 0    | 0      | G |
| 20 | BICF2S23112036          | 11707296 | A | 0    | 0      | G |
| 20 | TIGRP2P269830_rs8612224 | 11718905 | A | 0    | 0      | G |
| 20 | BICF2P541567            | 11730609 | A | 0    | 0      | G |
| 20 | BICF2P885449            | 11747008 | G | 0    | 0      | A |
| 20 | BICF2P1306869           | 11757731 | A | 0.5  | 0.6429 | G |
| 20 | BICF2P274399            | 11765992 | A | 0    | 0      | G |
| 20 | BICF2S2411456           | 11787201 | A | 0.25 | 0.2143 | G |
| 20 | BICF2P680393            | 11804827 | 0 | 0    | 0      | C |
| 20 | BICF2P687908            | 11811732 | G | 0    | 0      | A |
| 20 | BICF2P145292            | 11833092 | A | 0.25 | 0.2143 | G |
| 20 | BICF2P1455835           | 11842426 | A | 0    | 0      | G |
| 20 | BICF2P990926            | 11850911 | 0 | 0    | 0      | C |
| 20 | BICF2P1153611           | 11887403 | 0 | 0    | 0      | T |
| 20 | BICF2P1217393           | 11899361 | A | 0    | 0      | C |
| 20 | BICF2P954569            | 11904562 | A | 1    | 1      | G |
| 20 | BICF2P1153087           | 11914072 | A | 0    | 0      | G |
| 20 | BICF2P891654            | 11933028 | A | 0    | 0      | G |
| 20 | BICF2P166535            | 11949867 | A | 0    | 0      | G |
| 20 | BICF2S23039121          | 11969552 | A | 0.25 | 0.2143 | G |
| 20 | BICF2P823440            | 11978456 | G | 0.25 | 0.2143 | A |
| 20 | BICF2P1465632           | 11994141 | A | 0.25 | 0.1429 | G |
| 20 | TIGRP2P269854_rs8491599 | 11995206 | 0 | 0    | 0      | G |

|    |                         |          |   |      |         |   |
|----|-------------------------|----------|---|------|---------|---|
| 20 | BICF2P494242            | 12007058 | A | 0.25 | 0.1429  | G |
| 20 | TIGRP2P269855_rs9138736 | 12019947 | A | 0    | 0       | G |
| 20 | TIGRP2P269860_rs9147270 | 12035318 | C | 0    | 0       | G |
| 20 | BICF2S22960404          | 12050062 | G | 0.5  | 0.6429  | A |
| 20 | TIGRP2P269864_rs9133822 | 12060709 | A | 0.75 | 0.7857  | C |
| 20 | BICF2P964838            | 12069330 | G | 0    | 0       | A |
| 20 | BICF2P1470231           | 12078902 | A | 0    | 0       | G |
| 20 | BICF2S23635877          | 12095791 | G | 0.5  | 0.3571  | A |
| 20 | BICF2P897785            | 12100032 | A | 0.5  | 0.3571  | G |
| 20 | BICF2P1214854           | 12119997 | G | 0.5  | 0.3571  | A |
| 20 | BICF2P38451             | 12123618 | A | 0.5  | 0.6429  | C |
| 20 | BICF2P718611            | 12141854 | G | 0    | 0       | A |
| 20 | TIGRP2P269897_rs8810071 | 12145392 | G | 0.25 | 0.1429  | A |
| 20 | BICF2S23347737          | 12158025 | A | 0.75 | 0.7857  | T |
| 20 | BICF2S2306345           | 12178215 | A | 0    | 0       | G |
| 20 | BICF2P1055283           | 12183360 | A | 0    | 0       | G |
| 20 | BICF2S23324423          | 12190905 | G | 0    | 0       | A |
| 20 | BICF2P1142167           | 12209914 | 0 | 0    | 0       | A |
| 20 | BICF2P132170            | 12228520 | A | 0.75 | 0.8333  | G |
| 20 | BICF2P1182551           | 12241483 | A | 0.75 | 0.8571  | G |
| 20 | BICF2P1165787           | 12249667 | A | 0.75 | 0.8571  | C |
| 20 | TIGRP2P269915_rs9197440 | 12260645 | C | 0.75 | 0.8571  | A |
| 20 | BICF2P228717            | 12278757 | A | 0.75 | 0.8571  | G |
| 20 | BICF2P201017            | 12298343 | C | 0    | 0       | G |
| 20 | BICF2P320224            | 12313065 | A | 0.75 | 0.7857  | G |
| 20 | BICF2P1470172           | 12321402 | A | 0.75 | 0.7857  | G |
| 20 | BICF2P1098591           | 12330624 | G | 0    | 0       | A |
| 20 | BICF2P1316749           | 12340592 | A | 0.5  | 0.6429  | G |
| 20 | TIGRP2P269962_rs8768022 | 12356890 | G | 0.25 | 0       | A |
| 20 | TIGRP2P269969_rs9079135 | 12377308 | G | 0.75 | 0.9167  | A |
| 20 | TIGRP2P269972_rs8808751 | 12378757 | A | 0.5  | 0.6429  | G |
| 20 | BICF2P923784            | 12386586 | A | 0.25 | 0.2143  | G |
| 20 | BICF2P1390856           | 12398625 | A | 0.75 | 0.7857  | C |
| 20 | BICF2P348531            | 12409626 | A | 0    | 0       | G |
| 20 | BICF2P987821            | 12410273 | G | 0    | 0       | A |
| 20 | TIGRP2P269981_rs8520015 | 12435892 | A | 0.25 | 0.2143  | G |
| 20 | BICF2P1430532           | 12435956 | A | 0    | 0       | G |
| 20 | BICF2P1296282           | 12440497 | G | 0    | 0       | A |
| 20 | BICF2P252662            | 12453442 | A | 0.5  | 0.6429  | G |
| 20 | BICF2P811279            | 12460442 | G | 0.25 | 0.1429  | A |
| 20 | BICF2P31753             | 12469009 | A | 0    | 0       | G |
| 20 | BICF2S23019391          | 12479302 | C | 0    | 0       | A |
| 20 | BICF2P1370718           | 12493261 | A | 0.5  | 0.6429  | G |
| 20 | BICF2P646586            | 12505430 | A | 0.25 | 0.08333 | G |
| 20 | TIGRP2P270003_rs8521453 | 12514151 | G | 0.75 | 0.8571  | A |
| 20 | BICF2P995714            | 12532648 | A | 0    | 0       | G |
| 20 | BICF2P245801            | 12536903 | A | 0    | 0       | G |

|    |                         |          |   |      |        |   |
|----|-------------------------|----------|---|------|--------|---|
| 20 | BICF2S23713156          | 12547025 | G | 0    | 0      | A |
| 20 | BICF2P1322429           | 12565115 | A | 0.25 | 0.1429 | G |
| 20 | BICF2P1273998           | 12571131 | A | 0.25 | 0.1429 | C |
| 20 | BICF2P1299984           | 12591881 | G | 1    | 1      | A |
| 20 | BICF2P1299982           | 12592660 | A | 0    | 0      | G |
| 20 | BICF2P44348             | 12612395 | A | 0    | 0      | G |
| 20 | BICF2P645590            | 12621548 | A | 0    | 0      | G |
| 20 | BICF2P988814            | 12637094 | G | 0    | 0      | A |
| 20 | TIGRP2P270022_rs8876986 | 12639838 | 0 | 0    | 0      | C |
| 20 | BICF2P1254796           | 12652255 | C | 0    | 0      | A |
| 20 | TIGRP2P270028_rs8722882 | 12681101 | G | 0.25 | 0.1429 | A |
| 20 | BICF2P878636            | 12694862 | G | 0.25 | 0.1429 | A |
| 20 | BICF2S23150772          | 12697843 | C | 0    | 0      | A |
| 20 | BICF2P1312478           | 12708658 | A | 0    | 0      | G |
| 20 | BICF2S23048236          | 12723990 | A | 0    | 0      | C |
| 20 | BICF2P1056282           | 12733743 | A | 0.25 | 0.2857 | G |
| 20 | BICF2S22956294          | 12743950 | G | 0.75 | 0.7143 | A |
| 20 | TIGRP2P270070_rs8945714 | 12754615 | A | 0.25 | 0.1429 | G |
| 20 | BICF2S23428158          | 12767790 | A | 0.5  | 0.5714 | G |
| 20 | BICF2S22913218          | 12779556 | A | 0    | 0      | G |
| 20 | BICF2S23546349          | 12790912 | G | 0    | 0      | A |
| 20 | BICF2P545561            | 12806242 | C | 0    | 0      | A |
| 20 | BICF2P699423            | 12819912 | C | 0.5  | 0.5714 | A |
| 20 | BICF2S23023629          | 12834446 | C | 0    | 0      | A |
| 20 | BICF2S23258356          | 12845702 | A | 0    | 0      | G |
| 20 | BICF2P1308265           | 12860274 | 0 | 0    | 0      | G |
| 20 | BICF2S23044498          | 12879297 | 0 | 0    | 0      | G |
| 20 | BICF2P511719            | 12892978 | A | 0    | 0      | G |
| 20 | BICF2P1070957           | 12911094 | 0 | 0    | 0      | C |
| 20 | BICF2P1017350           | 12915704 | A | 0    | 0      | G |
| 20 | BICF2P439294            | 12926205 | 0 | 0    | 0      | G |
| 20 | BICF2P345629            | 12943882 | 0 | 0    | 0      | A |
| 20 | TIGRP2P270105_rs8880738 | 12956091 | G | 0    | 0      | A |
| 20 | BICF2P351263            | 12969291 | A | 0    | 0      | G |
| 20 | BICF2S2322931           | 12975626 | A | 0    | 0      | G |
| 20 | BICF2S23645005          | 12985905 | A | 0    | 0      | G |
| 20 | BICF2P452001            | 13002297 | G | 0    | 0      | A |
| 20 | BICF2P1230621           | 13009722 | G | 0    | 0      | A |
| 20 | BICF2S23622423          | 13036804 | G | 0    | 0      | A |
| 20 | BICF2S23049361          | 13097576 | A | 0.5  | 0.5714 | C |
| 20 | BICF2P1136751           | 13099835 | T | 0.5  | 0.5714 | A |
| 20 | BICF2S2364675           | 13115369 | G | 0.25 | 0.2857 | A |
| 20 | BICF2P936710            | 13122504 | A | 0.75 | 0.7143 | G |
| 20 | BICF2S23430103          | 13141622 | C | 0.25 | 0.1429 | A |
| 20 | BICF2P401682            | 13150891 | A | 0.25 | 0.2857 | G |
| 20 | BICF2P87082             | 13165014 | A | 0    | 0      | C |
| 20 | BICF2S23155922          | 13167740 | G | 0    | 0      | A |

|    |                         |          |   |      |        |   |
|----|-------------------------|----------|---|------|--------|---|
| 20 | BICF2P1333875           | 13186112 | A | 0.25 | 0.1429 | G |
| 20 | BICF2P1064605           | 13194814 | G | 0    | 0      | A |
| 20 | TIGRP2P270183_rs8787590 | 13210720 | A | 0.25 | 0.2857 | G |
| 20 | BICF2P334914            | 13228177 | C | NA   | 0.375  | A |
| 20 | BICF2S23147428          | 13247238 | A | 0.25 | 0.1429 | G |
| 20 | BICF2P769678            | 13256698 | G | 0.5  | 0.5714 | A |
| 20 | BICF2P172322            | 13263358 | C | 0.5  | 0.4286 | A |
| 20 | BICF2P962268            | 13276455 | A | 0.25 | 0.2857 | G |
| 20 | BICF2P731926            | 13279630 | A | 0.25 | 0.1429 | G |
| 20 | BICF2P396524            | 13292064 | G | 0.25 | 0.25   | A |
| 20 | BICF2P175764            | 13294795 | A | 0.75 | 0.8571 | G |
| 20 | BICF2P1287700           | 13309412 | G | 0    | 0      | A |
| 20 | BICF2S23451476          | 13317663 | A | 0.25 | 0.1429 | G |
| 20 | BICF2P289729            | 13336156 | C | 0.75 | 0.7143 | A |
| 20 | BICF2P1150428           | 13340490 | 0 | 0    | 0      | A |
| 20 | BICF2P1097591           | 13355527 | 0 | 0    | 0      | G |
| 20 | BICF2P152191            | 13371294 | G | 0.5  | 0.5714 | A |
| 20 | BICF2S22936271          | 13381667 | A | 0.25 | 0.2857 | G |
| 20 | BICF2P979590            | 13386684 | 0 | 0    | 0      | G |
| 20 | BICF2P502492            | 13398570 | G | 0.5  | 0.4286 | A |
| 20 | BICF2P74025             | 13410975 | G | 0    | 0      | A |
| 20 | BICF2P130126            | 13422126 | G | 0    | 0      | A |
| 20 | BICF2P501151            | 13434268 | C | 0    | 0      | A |
| 20 | BICF2P618983            | 13454081 | A | 0.25 | 0.2857 | G |
| 20 | BICF2S2295420           | 13460298 | T | 0.25 | 0.2857 | A |
| 20 | BICF2P1259264           | 13468386 | A | 1    | 1      | C |
| 20 | BICF2P1158072           | 13481228 | G | 0    | 0      | A |
| 20 | BICF2P1415373           | 13497961 | G | 0    | 0      | A |
| 20 | BICF2P1455794           | 13506005 | G | 0    | 0      | A |
| 20 | BICF2P1177517           | 13519827 | A | 0    | 0      | C |
| 20 | BICF2P1264370           | 13534897 | A | 0.5  | 0.5714 | G |
| 20 | BICF2P1175612           | 13541347 | A | 0    | 0      | G |
| 20 | BICF2S23351792          | 13556934 | A | 0.5  | 0.4286 | G |
| 20 | BICF2P294653            | 13564477 | G | 0    | 0      | A |
| 20 | BICF2P807587            | 13570928 | G | 0    | 0      | A |
| 20 | BICF2P1183625           | 13582007 | A | 0    | 0      | G |
| 20 | BICF2P192742            | 13602836 | 0 | 0    | 0      | A |
| 20 | BICF2P755721            | 13610918 | G | 0    | 0      | A |
| 20 | BICF2P755719            | 13611463 | C | 0    | 0      | A |
| 20 | BICF2P1412329           | 13616326 | A | 0.75 | 0.8571 | G |
| 20 | BICF2P754501            | 13637235 | C | 0    | 0      | A |
| 20 | BICF2S2392974           | 13639167 | 0 | 0    | 0      | G |
| 20 | BICF2P1010892           | 13660382 | A | 0.25 | 0.1429 | G |
| 20 | BICF2P182875            | 13663006 | G | 0    | 0      | A |
| 20 | BICF2P406221            | 13676399 | G | 0    | 0      | A |
| 20 | BICF2S23729977          | 13686671 | A | 0    | 0      | G |
| 20 | BICF2P345258            | 13717511 | G | 0    | 0      | A |

|    |                         |          |   |      |        |   |
|----|-------------------------|----------|---|------|--------|---|
| 20 | BICF2P1355941           | 13721834 | G | 0.25 | 0.1429 | A |
| 20 | BICF2P89605             | 13731780 | C | 0.25 | 0.1429 | A |
| 20 | BICF2P32491             | 13751365 | A | 0    | 0      | G |
| 20 | BICF2P154782            | 13760859 | A | 0    | 0      | G |
| 20 | BICF2P1105745           | 13770866 | A | 0.75 | 0.8571 | G |
| 20 | BICF2P303629            | 13780329 | G | 0.25 | 0.2857 | A |
| 20 | BICF2S22931571          | 13808724 | G | 1    | 1      | A |
| 20 | BICF2P888055            | 13815084 | G | 0    | 0      | A |
| 20 | BICF2P1333378           | 13823497 | A | 0    | 0      | G |
| 20 | BICF2S23338019          | 13839402 | G | 0    | 0.2857 | A |
| 20 | BICF2P149215            | 13856288 | G | 0.75 | 0.8571 | A |
| 20 | BICF2S23328278          | 13864586 | A | 0.75 | 0.8571 | G |
| 20 | BICF2S2365567           | 13875540 | G | 1    | 1      | A |
| 20 | BICF2S23113037          | 13889321 | T | 0.5  | 0.4286 | A |
| 20 | BICF2S2319434           | 13893636 | G | 0.5  | 0.4286 | A |
| 20 | BICF2P1349734           | 13905374 | C | 0.5  | 0.4286 | A |
| 20 | BICF2P749349            | 13917664 | G | 0.25 | 0.1429 | A |
| 20 | BICF2P636645            | 13926650 | G | 0.25 | 0.1429 | A |
| 20 | BICF2P104087            | 13943577 | G | 0.25 | 0.1429 | A |
| 20 | BICF2P557545            | 13950457 | C | 0.25 | 0.1429 | A |
| 20 | BICF2P1005110           | 13968089 | A | 0.75 | 0.7143 | G |
| 20 | BICF2P936811            | 13976751 | C | 0.75 | 0.8571 | G |
| 20 | BICF2P493684            | 13988741 | 0 | 0    | 0      | A |
| 20 | BICF2P938322            | 13997339 | 0 | 0    | 0      | A |
| 20 | TIGRP2P270201_rs8686395 | 14021933 | G | 0.75 | 0.8571 | A |
| 20 | TIGRP2P270211_rs9047172 | 14033255 | A | 0.75 | 0.8571 | C |
| 20 | BICF2P986576            | 14047167 | 0 | 0    | 0      | A |
| 20 | TIGRP2P270218_rs8974508 | 14058733 | G | 0.75 | 0.9167 | A |
| 20 | BICF2S23233783          | 14066590 | G | 0.75 | 0.8571 | A |
| 20 | TIGRP2P270224_rs9112973 | 14086382 | G | 0    | 0      | A |
| 20 | TIGRP2P270229_rs8588404 | 14093194 | G | 0    | 0      | A |
| 20 | BICF2S23334032          | 14101339 | G | 0.25 | 0.2857 | A |
| 20 | BICF2P222280            | 14118014 | G | 0    | 0      | A |
| 20 | BICF2P582174            | 14124824 | A | 0    | 0      | C |
| 20 | BICF2P891536            | 14139369 | G | 0.25 | 0.2857 | A |
| 20 | BICF2P59140             | 14149335 | G | 0    | 0.1429 | A |
| 20 | BICF2P276072            | 14164972 | A | 0.5  | 0.4286 | C |
| 20 | TIGRP2P270258_rs8762717 | 14178353 | A | 0.25 | 0.2857 | C |
| 20 | BICF2P934706            | 14184883 | A | 0.25 | 0.2857 | G |
| 20 | BICF2P613889            | 14197792 | A | 0.5  | 0.5714 | G |
| 20 | BICF2P326530            | 14210747 | G | 0.75 | 0.8571 | A |
| 20 | BICF2P353857            | 14224979 | A | 0.25 | 0.2857 | G |
| 20 | BICF2P383436            | 14229748 | A | 0.5  | 0.5714 | G |
| 20 | BICF2P1458163           | 14238014 | A | 0.25 | 0.2857 | C |
| 20 | BICF2S23723616          | 14255323 | A | 0.25 | 0.2857 | G |
| 20 | BICF2P186698            | 14261037 | A | 0.25 | 0.2857 | G |
| 20 | BICF2P582834            | 14280678 | G | 0.25 | 0.2857 | A |

|    |                         |          |   |      |         |   |
|----|-------------------------|----------|---|------|---------|---|
| 20 | BICF2P405729            | 14287360 | 0 | 0    | 0       | C |
| 20 | BICF2P775272            | 14299960 | 0 | 0    | 0       | A |
| 20 | BICF2P714370            | 14316179 | G | 0.5  | 0.5714  | A |
| 20 | BICF2P506927            | 14323688 | 0 | 0    | 0       | G |
| 20 | BICF2P961851            | 14330106 | A | 0.5  | 0.4286  | G |
| 20 | BICF2P266978            | 14349505 | A | 0.25 | 0.2857  | G |
| 20 | BICF2P20675             | 14369915 | G | 0.25 | 0.2857  | A |
| 20 | BICF2P1378454           | 14380132 | A | 0.25 | 0.25    | G |
| 20 | BICF2P722421            | 14400600 | 0 | 0    | 0       | T |
| 20 | BICF2P810681            | 14412019 | 0 | 0    | 0       | A |
| 20 | BICF2P506804            | 14436183 | 0 | 0    | 0       | A |
| 20 | BICF2P1160549           | 14458140 | 0 | 0    | 0       | G |
| 20 | TIGRP2P270282_rs8495640 | 14492123 | 0 | 0    | 0       | A |
| 20 | TIGRP2P270285_rs8549315 | 14507750 | G | 0.25 | 0.1429  | A |
| 20 | BICF2P978772            | 14518415 | A | 0.25 | 0.1429  | G |
| 20 | BICF2P217489            | 14540870 | G | 0.25 | 0.2857  | C |
| 20 | BICF2P250309            | 14547953 | A | 0.25 | 0.2857  | G |
| 20 | BICF2S23722407          | 14560717 | A | 0    | 0       | C |
| 20 | TIGRP2P270290_rs9075987 | 14577077 | G | 0.25 | 0.2857  | A |
| 20 | BICF2S2352242           | 14586227 | G | 0.5  | 0.5714  | A |
| 20 | TIGRP2P270303_rs8895519 | 14598254 | G | 0    | 0       | C |
| 20 | BICF2P1362192           | 14610830 | A | 0    | 0       | G |
| 20 | TIGRP2P270307_rs9211351 | 14621054 | G | 0.75 | 0.8571  | A |
| 20 | BICF2P1425005           | 14638266 | A | 0    | 0       | G |
| 20 | BICF2P1251165           | 14647755 | 0 | 0    | 0       | C |
| 20 | BICF2P96252             | 14666856 | G | 1    | 1       | A |
| 20 | TIGRP2P270342_rs8544605 | 14684351 | G | 1    | 1       | A |
| 20 | BICF2P1013748           | 14695316 | G | 0.25 | 0.1429  | A |
| 20 | BICF2S2345320           | 14701571 | G | 0.25 | 0.2857  | A |
| 20 | BICF2P1004942           | 14717089 | A | 0.25 | 0.2857  | G |
| 20 | BICF2P247045            | 14729180 | G | 0.25 | 0.2857  | A |
| 20 | BICF2S23310185          | 14737145 | A | 0    | 0       | G |
| 20 | TIGRP2P270370_rs8883635 | 14748786 | A | 0.25 | 0.1429  | G |
| 20 | BICF2P311073            | 14755517 | A | 0.25 | 0.1429  | G |
| 20 | TIGRP2P270383_rs8575872 | 14773033 | A | 0.5  | 0.4286  | G |
| 20 | BICF2S23727447          | 14778831 | A | 0.25 | 0.2857  | G |
| 20 | BICF2P1443382           | 14789800 | A | 1    | 1       | G |
| 20 | BICF2S23044399          | 14804905 | A | 0    | 0       | G |
| 20 | BICF2S2363178           | 14832420 | G | 0.5  | 0.5714  | A |
| 20 | BICF2S22932084          | 14838270 | A | 0    | 0       | G |
| 20 | BICF2P950344            | 14848686 | 0 | 0    | 0       | A |
| 20 | BICF2P424292            | 14869750 | 0 | 0    | 0       | A |
| 20 | BICF2S23618726          | 14891164 | G | 0.25 | 0.08333 | A |
| 20 | BICF2P780410            | 14902961 | 0 | 0    | 0       | A |
| 20 | TIGRP2P270415_rs8819209 | 14911364 | G | 0    | 0       | A |
| 20 | BICF2P615141            | 14919630 | A | 0.25 | 0.2857  | G |
| 20 | TIGRP2P270420_rs8692893 | 14937102 | G | 0.75 | 0.7143  | A |

|    |                         |          |   |      |         |   |
|----|-------------------------|----------|---|------|---------|---|
| 20 | BICF2P1269787           | 14943580 | A | 0.25 | 0.25    | C |
| 20 | BICF2P114702            | 14957568 | A | 0.25 | 0.1429  | G |
| 20 | TIGRP2P270428_rs9131267 | 14964086 | G | 0    | 0       | A |
| 20 | BICF2S2369146           | 14984065 | C | 0    | 0       | A |
| 20 | BICF2P394027            | 14987943 | G | 0    | 0       | A |
| 20 | BICF2P774310            | 15009075 | A | 0    | 0       | G |
| 20 | BICF2P511506            | 15022405 | G | 0    | 0       | A |
| 20 | TIGRP2P270462_rs8865448 | 15036973 | A | 0    | 0       | G |
| 20 | BICF2P716829            | 15048191 | A | 0    | 0       | G |
| 20 | BICF2P1462185           | 15053718 | C | 0    | 0       | A |
| 20 | BICF2S23141876          | 15072571 | G | 0    | 0       | A |
| 20 | BICF2S23647657          | 15091429 | A | 0    | 0       | G |
| 20 | BICF2P33889             | 15121765 | G | 0.25 | 0.1429  | A |
| 20 | BICF2P548642            | 15125031 | A | 0.25 | 0.1429  | C |
| 20 | BICF2P1049584           | 15134864 | G | 0.25 | 0.08333 | A |
| 20 | BICF2P1274057           | 15146854 | G | 0.25 | 0.1429  | A |
| 20 | TIGRP2P270480_rs9170955 | 15163225 | A | 0.25 | 0.1429  | G |
| 20 | BICF2P180867            | 15171977 | A | 0.25 | 0.1429  | G |
| 20 | BICF2P249302            | 15185432 | 0 | 0    | 0       | C |
| 20 | TIGRP2P270484_rs8590955 | 15214235 | C | 0    | 0       | A |
| 20 | TIGRP2P270488_rs9192033 | 15230376 | A | 0    | 0       | T |
| 20 | BICF2P276573            | 15270852 | G | 0    | 0       | A |
| 20 | BICF2P676214            | 15281005 | G | 0    | 0       | A |
| 20 | TIGRP2P270505_rs8976979 | 15288359 | A | 0    | 0       | G |
| 20 | BICF2P415               | 15302540 | G | 0    | 0       | A |
| 20 | TIGRP2P270507_rs9134358 | 15313729 | A | 0    | 0       | G |
| 20 | TIGRP2P270508_rs8604402 | 15321807 | C | 0    | 0       | A |
| 20 | BICF2P1108031           | 15358236 | A | 0.25 | 0.1429  | G |
| 20 | BICF2S23431713          | 15370525 | 0 | 0    | 0       | A |
| 20 | BICF2S23129751          | 15405532 | C | 0    | 0       | A |
| 20 | BICF2P1027047           | 15418031 | 0 | 0    | 0       | A |
| 20 | BICF2S2379178           | 15429136 | A | 0.5  | 0.5714  | C |
| 20 | BICF2P896324            | 15442865 | A | 0    | 0       | G |
| 20 | BICF2P190503            | 15444818 | A | 0.25 | 0.1429  | G |
| 20 | BICF2P853528            | 15457872 | A | 0.5  | 0.5714  | G |
| 20 | BICF2P1264813           | 15459354 | A | 0    | 0       | G |
| 20 | BICF2P952740            | 15463881 | A | 0.25 | 0.1429  | G |
| 20 | BICF2P685292            | 15467024 | A | 0    | 0       | G |
| 20 | TIGRP2P270515_rs8522317 | 15471374 | A | 0.25 | 0.1429  | C |
| 20 | BICF2P209576            | 15483865 | 0 | 0    | 0       | A |
| 20 | BICF2S24323551          | 15495559 | G | 0    | 0       | A |
| 20 | TIGRP2P270518_rs9094473 | 15506739 | 0 | 0    | 0       | A |
| 20 | TIGRP2P270519_rs9117563 | 15522499 | 0 | 0    | 0       | A |
| 20 | BICF2P916628            | 15532208 | 0 | 0    | 0       | G |
| 20 | BICF2S24319896          | 15536562 | G | 0.75 | 0.8571  | A |
| 20 | BICF2P1395346           | 15556881 | A | 0    | 0       | G |
| 20 | BICF2P679211            | 15570402 | 0 | 0    | 0       | A |

|    |                         |          |   |      |        |   |
|----|-------------------------|----------|---|------|--------|---|
| 20 | BICF2P769582            | 15576214 | G | 0.25 | 0.2857 | A |
| 20 | BICF2S23053569          | 15583101 | 0 | 0    | 0      | G |
| 20 | TIGRP2P270538_rs9213287 | 15596755 | G | 0    | 0      | A |
| 20 | TIGRP2P270542_rs8591656 | 15613716 | 0 | 0    | 0      | C |
| 20 | TIGRP2P270545_rs8843217 | 15618529 | A | 0.25 | 0.1429 | C |
| 20 | BICF2P797654            | 15630396 | A | 0    | 0      | G |
| 20 | TIGRP2P270554_rs9196652 | 15642881 | A | 0    | 0      | G |
| 20 | BICF2S23430869          | 15652132 | A | 0.5  | 0.5714 | G |
| 20 | BICF2P1172662           | 15669962 | G | 0.75 | 0.8571 | A |
| 20 | BICF2S23521388          | 15691112 | A | 0.25 | 0.2857 | G |
| 20 | BICF2P438336            | 15700935 | G | 0.25 | 0.25   | A |
| 20 | BICF2P428834            | 15712019 | G | 0.5  | 0.4286 | A |
| 20 | BICF2P910016            | 15728935 | C | 0    | 0      | A |
| 20 | BICF2P1051843           | 15742800 | A | 0.5  | 0.4167 | G |
| 20 | BICF2P448608            | 15747756 | G | 0    | 0      | A |
| 20 | BICF2P448609            | 15748131 | A | 0    | 0      | G |
| 20 | TIGRP2P270574_rs8801637 | 15761153 | C | 0.5  | 0.4286 | A |
| 20 | BICF2P222694            | 15768778 | C | 0    | 0      | A |
| 20 | BICF2P210534            | 15780866 | 0 | 0    | 0      | C |
| 20 | BICF2S22911824          | 15794378 | A | 0    | 0      | G |
| 20 | BICF2S23723725          | 15802539 | A | 0    | 0      | G |
| 20 | BICF2S2377548           | 15821361 | T | 0    | 0      | A |
| 20 | BICF2S2377625           | 15824802 | A | 0    | 0      | T |
| 20 | TIGRP2P270586_rs9172841 | 15846794 | A | 0    | 0      | C |
| 20 | TIGRP2P270590_rs8938628 | 15866064 | A | 0    | 0      | C |
| 20 | BICF2P598640            | 15874228 | A | 0    | 0      | G |
| 20 | TIGRP2P270601_rs9179077 | 15884356 | A | 0.25 | 0.1429 | G |
| 20 | TIGRP2P270605_rs8672317 | 15899902 | T | 0    | 0      | A |
| 20 | BICF2P1201587           | 15899963 | 0 | 0    | 0      | G |
| 20 | BICF2P1028096           | 15905936 | C | 0    | 0      | A |
| 20 | TIGRP2P270622_rs8710028 | 15917526 | G | 0.25 | 0.1429 | A |
| 20 | BICF2P758761            | 15944384 | A | 0    | 0      | G |
| 20 | TIGRP2P270638_rs9017963 | 15968948 | G | 0    | 0      | A |
| 20 | BICF2P1269096           | 15982978 | A | 0    | 0      | G |
| 20 | BICF2P1265933           | 15987232 | A | 0    | 0      | G |
| 20 | BICF2P843364            | 16002417 | A | 0.25 | 0.1429 | C |
| 20 | TIGRP2P270655_rs8770129 | 16014634 | C | 0    | 0      | A |
| 20 | BICF2P488375            | 16030535 | A | 0    | 0      | G |
| 20 | BICF2P371098            | 16032138 | G | 0    | 0      | A |
| 20 | TIGRP2P270664_rs9009022 | 16061434 | G | 0    | 0      | A |
| 20 | BICF2S23444557          | 16065827 | A | 0.25 | 0.1429 | G |
| 20 | BICF2P78404             | 16080924 | G | 0.25 | 0.1429 | A |
| 20 | BICF2P398682            | 16096133 | A | 0    | 0      | C |
| 20 | BICF2P1175868           | 16101681 | A | 0    | 0      | C |
| 20 | BICF2S23021195          | 16113139 | A | 0    | 0      | C |
| 20 | BICF2P730012            | 16131464 | C | 0    | 0      | A |
| 20 | BICF2P1123360           | 16140923 | G | 0    | 0      | A |



|    |                         |          |   |      |        |   |
|----|-------------------------|----------|---|------|--------|---|
| 20 | BICF2S2319228           | 16157414 | C | 0.25 | 0.2857 | A |
| 20 | BICF2S23535634          | 16162451 | G | 0    | 0      | A |
| 20 | BICF2S23131530          | 16179751 | G | 0.25 | 0.2857 | A |
| 20 | BICF2P1164292           | 16182628 | A | 0.25 | 0.2857 | G |
| 20 | BICF2S23316931          | 16195942 | G | 0.25 | 0.2857 | A |
| 20 | TIGRP2P270688_rs9077579 | 16210708 | A | 0.5  | 0.4286 | G |
| 20 | BICF2P773049            | 16223811 | C | 0.25 | 0.1429 | A |
| 20 | BICF2P167438            | 16230321 | 0 | 0    | 0      | A |
| 20 | BICF2P1179782           | 16242391 | G | 0.75 | 0.7143 | A |
| 20 | BICF2P1376799           | 16261683 | G | 0.75 | 0.7143 | A |
| 20 | BICF2P1056166           | 16275436 | C | 0.75 | 0.7143 | A |
| 20 | BICF2P1091333           | 16287067 | 0 | 0    | 0      | A |
| 20 | BICF2P1262784           | 16312660 | C | 0.75 | 0.7143 | A |
| 20 | BICF2P625934            | 16328718 | C | 0.75 | 0.75   | A |
| 20 | TIGRP2P270697_rs8929082 | 16338481 | 0 | 0    | 0      | G |
| 20 | TIGRP2P270698_rs8603833 | 16344521 | 0 | 0    | 0      | G |
| 20 | BICF2P226212            | 16366210 | G | 0.75 | 0.7143 | A |
| 20 | TIGRP2P270729_rs8573697 | 16376473 | G | 0    | 0      | C |
| 20 | BICF2P80878             | 16388870 | A | 0.75 | 0.7143 | G |
| 20 | BICF2P537281            | 16410235 | G | 0.75 | 0.7143 | A |
| 20 | BICF2P1170537           | 16414140 | A | 0.75 | 0.7143 | G |
| 20 | BICF2P392780            | 16423016 | G | 0    | 0      | A |
| 20 | BICF2S23532506          | 16433924 | A | 0    | 0      | G |
| 20 | TIGRP2P270754_rs9145341 | 16445842 | C | 0    | 0      | A |
| 20 | BICF2P1239337           | 16463248 | A | 0    | 0      | G |
| 20 | BICF2P246721            | 16487672 | A | 0    | 0      | G |
| 20 | BICF2S23126185          | 16511414 | G | 0    | 0      | A |
| 20 | BICF2P1351127           | 16519762 | A | 0    | 0      | G |
| 20 | BICF2P1146457           | 16525832 | G | 0    | 0      | A |
| 20 | BICF2S23041695          | 16544220 | C | 1    | 1      | A |
| 20 | TIGRP2P270794_rs8955108 | 16556590 | G | 0    | 0      | A |
| 20 | TIGRP2P270802_rs8943506 | 16565640 | A | 0    | 0      | G |
| 20 | BICF2P735676            | 16575608 | G | 0    | 0      | A |
| 20 | TIGRP2P270825_rs9059772 | 16584150 | A | 0    | 0      | C |
| 20 | BICF2P747544            | 16599062 | A | 0    | 0      | G |
| 20 | BICF2P780224            | 16614596 | A | 0    | 0      | G |
| 20 | BICF2P1270083           | 16615539 | A | 0    | 0      | G |
| 20 | BICF2P1099232           | 16628542 | A | 0    | 0      | G |
| 20 | BICF2P1198766           | 16634477 | 0 | 0    | 0      | G |
| 20 | BICF2P1220979           | 16641837 | G | 0    | 0      | A |
| 20 | BICF2S23211262          | 16654536 | G | 0    | 0      | A |
| 20 | BICF2P1376034           | 16665060 | A | 1    | 1      | G |
| 20 | BICF2P1198410           | 16670910 | A | 1    | 1      | G |
| 20 | BICF2P236770            | 16682329 | A | 0    | 0      | C |
| 20 | BICF2P713990            | 16700684 | A | 0    | 0      | G |
| 20 | BICF2P460319            | 16717345 | G | 0    | 0      | A |
| 20 | BICF2P1510746           | 16724221 | A | 0    | 0      | G |

|    |                         |          |   |      |        |   |
|----|-------------------------|----------|---|------|--------|---|
| 20 | BICF2S23246455          | 16742742 | A | 0.25 | 0.2857 | G |
| 20 | TIGRP2P270912_rs9091986 | 16745723 | A | 0    | 0      | C |
| 20 | BICF2P1161266           | 16778541 | G | 1    | 1      | A |
| 20 | BICF2S23434236          | 16791014 | G | 0    | 0      | A |
| 20 | TIGRP2P270928_rs8782951 | 16812381 | G | 0.25 | 0.2857 | A |
| 20 | BICF2P103987            | 16815045 | 0 | 0    | 0      | A |
| 20 | BICF2S23913836          | 16847485 | C | 0.25 | 0.2857 | A |
| 20 | BICF2P726463            | 16882803 | A | 0    | 0      | G |
| 20 | BICF2P1173509           | 16903740 | A | 0    | 0      | G |
| 20 | BICF2S2366545           | 16907984 | G | 0.5  | 0.4286 | A |
| 20 | BICF2P18256             | 16922492 | A | 0    | 0      | G |
| 20 | BICF2P27292             | 16939237 | A | 0    | 0      | G |
| 20 | BICF2S23524238          | 16954258 | G | 0.75 | 0.75   | A |
| 20 | BICF2S23755135          | 16962763 | A | 0.5  | 0.4286 | G |
| 20 | BICF2P889935            | 16977642 | 0 | 0    | 0      | A |
| 20 | TIGRP2P270965_rs8655554 | 16989373 | G | 0    | 0      | A |
| 20 | BICF2P1419278           | 17000376 | A | 0.25 | 0.1429 | G |
| 20 | BICF2S23632478          | 17014472 | A | 0.5  | 0.5714 | G |
| 20 | BICF2P699889            | 17046460 | 0 | NA   | 0      | A |
| 20 | BICF2S23323771          | 17058158 | C | 0.25 | 0.1429 | A |
| 20 | G1090f16S211            | 17084910 | G | 0    | 0      | A |
| 20 | BICF2S2351822           | 17110697 | A | 0.25 | 0.1429 | G |
| 20 | BICF2P939857            | 17116778 | A | 0.75 | 0.7143 | G |
| 20 | BICF2P664172            | 17133552 | 0 | 0    | 0      | C |
| 20 | BICF2P385239            | 17145348 | A | 0    | 0      | G |
| 20 | BICF2P1067725           | 17147887 | 0 | 0    | 0      | A |
| 20 | BICF2P1291222           | 17168667 | A | 0.75 | 0.7143 | C |
| 20 | BICF2P771925            | 17176707 | A | 0.25 | 0.1429 | G |
| 20 | BICF2P742354            | 17182457 | G | 0.25 | 0.1429 | A |
| 20 | TIGRP2P271047_rs9002720 | 17192619 | A | 0.25 | 0      | C |
| 20 | BICF2S23011664          | 17207065 | A | 0    | 0.25   | C |
| 20 | TIGRP2P271050_rs8864734 | 17226329 | G | 0.25 | 0.1429 | A |
| 20 | BICF2S23659700          | 17231126 | A | 0    | 0      | T |
| 20 | BICF2P1340657           | 17243596 | G | 0.75 | 0.8571 | C |
| 20 | BICF2S23337878          | 17250013 | G | 0.75 | 0.8571 | A |
| 20 | BICF2S23327589          | 17270117 | G | 0    | 0      | A |
| 20 | BICF2P715547            | 17276938 | G | 1    | 0.8571 | A |
| 20 | TIGRP2P271077_rs9165692 | 17284711 | A | 1    | 0.8571 | G |
| 20 | BICF2P577916            | 17296776 | G | 0.75 | 0.8571 | A |
| 20 | BICF2P441843            | 17308421 | A | 0.75 | 0.8571 | C |
| 20 | BICF2P162706            | 17320377 | 0 | 0    | 0      | G |
| 20 | BICF2S23534198          | 17349185 | 0 | 0    | 0      | G |
| 20 | BICF2P1212853           | 17359423 | A | 0.5  | 0.5714 | G |
| 20 | BICF2S2332811           | 17366096 | A | 0.5  | 0.4286 | G |
| 20 | BICF2S2322054           | 17380141 | A | 0.5  | 0.5714 | G |
| 20 | BICF2P1189558           | 17400510 | C | 0.5  | 0.5714 | A |
| 20 | BICF2P970280            | 17432691 | A | 0    | 0      | G |

|    |                         |          |   |      |         |   |
|----|-------------------------|----------|---|------|---------|---|
| 20 | TIGRP2P271133_rs8685103 | 17442818 | G | 0    | 0       | A |
| 20 | BICF2P93738             | 17447183 | A | 0    | 0       | C |
| 20 | TIGRP2P271138_rs8981537 | 17462944 | A | 0.75 | 0.7143  | C |
| 20 | BICF2P857373            | 17475335 | G | 0.75 | 0.7143  | A |
| 20 | BICF2S23437987          | 17484332 | G | 0.75 | 0.7143  | A |
| 20 | BICF2S22922299          | 17494462 | A | 0.25 | 0.1429  | G |
| 20 | BICF2P848708            | 17510141 | C | 0.75 | 0.7143  | G |
| 20 | BICF2S23642317          | 17515222 | G | 0.25 | 0.08333 | A |
| 20 | BICF2S23211605          | 17548274 | A | 0    | 0       | G |
| 20 | BICF2P286333            | 17557321 | 0 | 0    | 0       | C |
| 20 | BICF2P1326896           | 17561275 | 0 | 0    | 0       | A |
| 20 | BICF2S23224273          | 17583427 | A | 0.25 | 0.2857  | G |
| 20 | BICF2S23718668          | 17589097 | A | 0.25 | 0.2857  | G |
| 20 | BICF2P981710            | 17600267 | 0 | 0    | 0       | G |
| 20 | BICF2P691882            | 17625622 | A | 0    | 0       | G |
| 20 | BICF2P1127089           | 17649120 | G | 0    | 0       | A |
| 20 | BICF2P185601            | 17658273 | A | 0.25 | 0.1429  | C |
| 20 | BICF2P689470            | 17667627 | C | 0    | 0       | A |
| 20 | TIGRP2P271145_rs9004886 | 17679816 | A | 0    | 0       | C |
| 20 | BICF2P850020            | 17690370 | A | 0    | 0       | G |
| 20 | BICF2S2361951           | 17700590 | C | 0    | 0       | G |
| 20 | BICF2S23515465          | 17719188 | A | 0    | 0       | C |
| 20 | BICF2P1100464           | 17722314 | G | 0    | 0       | A |
| 20 | BICF2S23343732          | 17738239 | A | 0    | 0       | G |
| 20 | BICF2P474331            | 17744468 | A | 0.25 | 0.1429  | G |
| 20 | BICF2P1147684           | 17752162 | A | 0    | 0       | G |
| 20 | BICF2P101780            | 17774867 | G | 0    | 0       | A |
| 20 | BICF2P197499            | 17786395 | G | 0    | 0       | A |
| 20 | BICF2P117692            | 17805357 | A | 0.25 | 0.1429  | C |
| 20 | BICF2P254319            | 17817446 | G | 0.25 | 0.1429  | A |
| 20 | BICF2P1139520           | 17833986 | A | 0.75 | 0.8571  | C |
| 20 | BICF2P1037794           | 17844814 | G | 0.25 | 0.1429  | A |
| 20 | BICF2P788502            | 17849924 | C | 0.25 | 0.1429  | A |
| 20 | BICF2P891865            | 17855124 | C | 0.75 | 0.8571  | A |
| 20 | BICF2P1004427           | 17879007 | G | 0    | 0       | A |
| 20 | BICF2S2339705           | 17889869 | A | 0.25 | 0       | G |
| 20 | BICF2P877356            | 17894983 | G | 0    | 0       | A |
| 20 | BICF2S23043259          | 17919071 | G | 0    | 0       | A |
| 20 | BICF2S23117786          | 17936083 | G | 0    | 0       | A |
| 20 | BICF2P827633            | 17946669 | G | 0    | 0       | A |
| 20 | BICF2P711017            | 17952314 | G | 0.75 | 0.8571  | A |
| 20 | BICF2P1029313           | 17971295 | G | 0.75 | 0.9167  | A |
| 20 | BICF2S23152583          | 17980640 | A | 0    | 0       | G |
| 20 | TIGRP2P271195_rs8790092 | 18003441 | A | 0.25 | 0.2857  | G |
| 20 | BICF2P260816            | 18018842 | 0 | 0    | 0       | G |
| 20 | BICF2P924661            | 18023016 | A | 0.25 | 0.1429  | G |
| 20 | BICF2P1051621           | 18043257 | A | 0    | 0       | G |

|    |                         |          |   |      |        |   |
|----|-------------------------|----------|---|------|--------|---|
| 20 | BICF2P1268553           | 18048137 | G | 0    | 0      | A |
| 20 | BICF2P1064010           | 18064338 | G | 0    | 0      | A |
| 20 | BICF2P1171989           | 18099556 | A | 0    | 0      | C |
| 20 | TIGRP2P271208_rs9182019 | 18111328 | 0 | 0    | 0      | A |
| 20 | TIGRP2P271215_rs9013562 | 18125076 | A | 0.75 | 0.8571 | G |
| 20 | TIGRP2P271218_rs8694967 | 18138717 | A | 0    | 0      | G |
| 20 | TIGRP2P271223_rs8949060 | 18157550 | G | 0    | 0      | A |
| 20 | BICF2P300142            | 18168000 | A | 0    | 0      | G |
| 20 | BICF2P977050            | 18173847 | A | 0    | 0      | G |
| 20 | BICF2P1026527           | 18183449 | G | 0.25 | 0.1429 | A |
| 20 | BICF2S23149769          | 18197956 | A | 0    | 0      | G |
| 20 | TIGRP2P271231_rs8809807 | 18205823 | C | 0.25 | 0.1429 | G |
| 20 | BICF2P395211            | 18218277 | C | 0.25 | 0.1429 | A |
| 20 | TIGRP2P271247_rs9148687 | 18227781 | G | 0.75 | 0.8571 | A |
| 20 | TIGRP2P271255_rs9089251 | 18244171 | 0 | 0    | 0      | A |
| 20 | BICF2P325310            | 18257440 | A | 0.75 | 0.8571 | G |
| 20 | BICF2P419261            | 18270894 | G | 0    | 0      | A |
| 20 | TIGRP2P271276_rs8824191 | 18279187 | A | 0    | 0      | G |
| 20 | BICF2S23236844          | 18285836 | A | 0    | 0      | G |
| 20 | BICF2S23539429          | 18336091 | 0 | 0    | 0      | A |
| 20 | BICF2P1090904           | 18342837 | 0 | 0    | 0      | A |
| 20 | BICF2P408345            | 18379998 | 0 | 0    | 0      | G |
| 20 | BICF2P158921            | 18391712 | 0 | 0    | 0      | C |
| 20 | BICF2S23616340          | 18416322 | T | 0    | 0      | A |
| 20 | BICF2P1371673           | 18425021 | A | 0.75 | 0.8571 | G |
| 20 | BICF2P194424            | 18445701 | A | 0    | 0      | G |
| 20 | BICF2P194429            | 18447031 | A | 0.75 | 0.8571 | C |
| 20 | BICF2P1494978           | 18461347 | A | 0    | 0      | G |
| 20 | BICF2P776585            | 18471136 | T | 0    | 0      | A |
| 20 | BICF2P153406            | 18484485 | G | 0    | 0      | A |
| 20 | TIGRP2P271284_rs9232693 | 18494402 | A | 0    | 0      | G |
| 20 | TIGRP2P271289_rs9142117 | 18509195 | A | 0    | 0      | G |
| 20 | TIGRP2P271300_rs8984439 | 18524902 | 0 | 0    | 0      | A |
| 20 | BICF2P1252576           | 18537567 | G | 0    | 0      | A |
| 20 | BICF2S23532375          | 18541101 | G | 0    | 0      | A |
| 20 | BICF2S23211231          | 18559191 | A | 0    | 0      | C |
| 20 | BICF2P1441480           | 18561317 | A | 0.5  | 0.5714 | G |
| 20 | BICF2P537734            | 18577932 | 0 | 0    | 0      | G |
| 20 | BICF2S2305637           | 18591629 | G | 0.5  | 0.5714 | A |
| 20 | BICF2P13485             | 18595524 | G | 0    | 0      | A |
| 20 | BICF2P498148            | 18608762 | G | 0    | 0      | A |
| 20 | TIGRP2P271330_rs9042477 | 18608837 | G | 0    | 0      | A |
| 20 | BICF2P751605            | 18620843 | A | 0    | 0      | G |
| 20 | TIGRP2P271383_rs9139289 | 18649926 | G | 0    | 0      | A |
| 20 | BICF2P1330668           | 18655740 | A | 0    | 0      | G |
| 20 | BICF2P584483            | 18670728 | A | 0    | 0      | G |
| 20 | BICF2P1293617           | 18693796 | 0 | NA   | NA     | A |

|    |                         |          |   |      |        |   |
|----|-------------------------|----------|---|------|--------|---|
| 20 | BICF2P929285            | 18722123 | A | 0.25 | 0.1429 | C |
| 20 | BICF2P694703            | 18741674 | 0 | 0    | 0      | A |
| 20 | BICF2P311646            | 18753006 | A | 0    | 0      | C |
| 20 | TIGRP2P271413_rs8901730 | 18760327 | A | 0    | 0      | G |
| 20 | TIGRP2P271417_rs8842620 | 18771796 | 0 | 0    | 0      | A |
| 20 | BICF2S23512244          | 18786101 | G | 0.25 | 0.2857 | A |
| 20 | BICF2P1453555           | 18791285 | 0 | 0    | 0      | G |
| 20 | BICF2P435534            | 18803041 | A | 0    | 0      | G |
| 20 | BICF2P732507            | 18817509 | T | 0    | 0      | A |
| 20 | TIGRP2P271449_rs8792504 | 18833231 | A | 0    | 0      | G |
| 20 | BICF2S22928550          | 18845252 | A | 0    | 0      | G |
| 20 | BICF2P230536            | 18858810 | A | 0.25 | 0.1429 | C |
| 20 | BICF2P86571             | 18863621 | A | 0    | 0      | G |
| 20 | TIGRP2P271462_rs8527788 | 18877618 | G | 0    | 0      | A |
| 20 | BICF2S23632289          | 18886469 | G | 0.25 | 0.1429 | A |
| 20 | BICF2P503510            | 18889376 | G | 0    | 0      | A |
| 20 | BICF2P217895            | 18899316 | 0 | 0    | 0      | A |
| 20 | BICF2S2327301           | 18912728 | C | 0    | 0      | A |
| 20 | TIGRP2P271487_rs9175729 | 18922039 | A | 0.25 | 0.1429 | G |
| 20 | BICF2P568585            | 18938741 | G | 0    | 0      | A |
| 20 | TIGRP2P271512_rs8773389 | 18951814 | G | 0    | 0      | A |
| 20 | TIGRP2P271513_rs8773393 | 18952160 | G | 0    | 0      | A |
| 20 | BICF2P1028475           | 18952490 | A | 0    | 0      | G |
| 20 | BICF2P1362855           | 18970319 | G | 1    | 1      | A |
| 20 | BICF2P1197092           | 18977998 | G | 0    | 0      | A |
| 20 | BICF2P85874             | 18995537 | A | 0.5  | 0.4286 | G |
| 20 | TIGRP2P271525_rs8649118 | 19000154 | 0 | 0    | 0      | G |
| 20 | BICF2S2319876           | 19016127 | G | 0    | 0      | A |
| 20 | BICF2P590739            | 19029588 | A | 0.5  | 0.4286 | G |
| 20 | BICF2S23333852          | 19050968 | G | 0.25 | 0.1429 | A |
| 20 | BICF2P1272927           | 19059180 | G | 0.25 | 0.1429 | A |
| 20 | BICF2P672058            | 19068933 | C | 0.25 | 0.1429 | A |
| 20 | BICF2P758751            | 19088509 | 0 | 0    | 0      | C |
| 20 | BICF2P307935            | 19107216 | C | 0    | 0      | G |
| 20 | TIGRP2P271569_rs8920514 | 19113192 | G | 0.25 | 0.1429 | A |
| 20 | BICF2P67719             | 19130775 | A | 0.5  | 0.5714 | G |
| 20 | BICF2S23036843          | 19145679 | A | 0    | 0      | G |
| 20 | BICF2S23443336          | 19155699 | G | 0    | 0      | A |
| 20 | BICF2P1182240           | 19159522 | A | 0    | 0      | G |
| 20 | BICF2P357407            | 19167261 | G | 0    | 0      | A |
| 20 | BICF2P334402            | 19175346 | G | 0    | 0      | A |
| 20 | BICF2P385121            | 19183071 | 0 | 0    | 0      | A |
| 20 | BICF2P1047632           | 19196199 | A | 0    | 0      | G |
| 20 | BICF2P483847            | 19207126 | G | 0    | 0      | A |
| 20 | BICF2P94920             | 19226452 | 0 | 0    | 0      | A |
| 20 | BICF2P376622            | 19231744 | A | 0    | 0      | G |
| 20 | BICF2P492349            | 19242187 | G | 0    | 0      | A |

|    |                         |          |   |      |        |   |
|----|-------------------------|----------|---|------|--------|---|
| 20 | BICF2S23140247          | 19262061 | A | 0    | 0      | G |
| 20 | BICF2P114885            | 19263139 | G | 0    | 0      | A |
| 20 | BICF2P1372858           | 19274281 | G | 0    | 0      | A |
| 20 | BICF2P676745            | 19292855 | A | 0    | 0      | G |
| 20 | BICF2P104033            | 19297078 | G | 0    | 0      | A |
| 20 | TIGRP2P271635_rs8385908 | 19317196 | A | 0    | 0      | C |
| 20 | BICF2P679867            | 19325980 | A | 0    | 0      | G |
| 20 | TIGRP2P271643_rs8711088 | 19333545 | 0 | 0    | 0      | A |
| 20 | TIGRP2P271649_rs8771985 | 19363335 | G | 0    | 0      | A |
| 20 | BICF2P1234446           | 19376533 | 0 | 0    | 0      | A |
| 20 | TIGRP2P271652_rs8587416 | 19388714 | G | 0    | 0      | A |
| 20 | BICF2S23139892          | 19399607 | G | 0    | 0      | A |
| 20 | G1092f48S311            | 19430434 | 0 | 0    | 0      | A |
| 20 | BICF2G630229411         | 19459309 | G | 0.25 | 0.1429 | A |
| 20 | BICF2P926832            | 19482187 | G | 0    | 0      | A |
| 20 | BICF2G630229416         | 19493094 | A | 0    | 0      | G |
| 20 | BICF2G630229437         | 19525447 | C | 0    | 0      | A |
| 20 | BICF2G630229438         | 19527115 | G | 0.5  | 0.5714 | A |
| 20 | BICF2G630229444         | 19544961 | A | 0    | 0      | G |
| 20 | BICF2G630229450         | 19551873 | C | 0    | 0      | A |
| 20 | BICF2G630229451         | 19570653 | C | 0    | 0      | A |
| 20 | BICF2S23113660          | 19577289 | G | 0    | 0      | A |
| 20 | BICF2S23034037          | 19585739 | A | 0    | 0      | G |
| 20 | BICF2P640545            | 19600835 | A | 0    | 0      | G |
| 20 | BICF2P722727            | 19617967 | 0 | 0    | 0      | A |
| 20 | BICF2S23615297          | 19624449 | A | 0    | 0      | C |
| 20 | BICF2S23025312          | 19631941 | 0 | 0    | 0      | G |
| 20 | BICF2P918932            | 19674346 | A | 0    | 0      | G |
| 20 | BICF2G630229459         | 19678602 | A | 1    | 1      | G |
| 20 | BICF2G630229487         | 19696100 | A | 0    | 0      | G |
| 20 | BICF2G630229506         | 19709449 | A | 0    | 0      | G |
| 20 | BICF2G630229547         | 19722127 | G | 0    | 0      | A |
| 20 | BICF2G630229559         | 19731911 | G | 0    | 0      | A |
| 20 | BICF2G630229564         | 19743050 | A | 0    | 0      | G |
| 20 | BICF2G630229573         | 19749803 | A | 0    | 0      | G |
| 20 | BICF2P1379370           | 19759752 | A | 0    | 0      | C |
| 20 | BICF2P500189            | 19779371 | A | 0.5  | 0.5714 | G |
| 20 | BICF2P1264662           | 19782435 | G | 0    | 0      | A |
| 20 | BICF2G630229612         | 19797030 | A | 0.5  | 0.4286 | G |
| 20 | BICF2G630229627         | 19808707 | A | 0    | 0      | G |
| 20 | BICF2P730826            | 19811597 | T | 0.5  | 0.4286 | A |
| 20 | BICF2P730827            | 19811779 | G | 0.5  | 0.4286 | A |
| 20 | BICF2P253312            | 19818572 | G | 0    | 0      | A |
| 20 | BICF2P1144936           | 19835285 | G | 0    | 0      | A |
| 20 | BICF2P223719            | 19842874 | G | 0    | 0      | A |
| 20 | TIGRP2P271717_rs9134545 | 19850728 | G | 0    | 0      | A |
| 20 | BICF2P485458            | 19863920 | A | 0.25 | 0.2857 | G |

|    |                         |          |   |      |        |   |
|----|-------------------------|----------|---|------|--------|---|
| 20 | BICF2P1148386           | 19891552 | G | 0.5  | 0.4167 | A |
| 20 | BICF2G630229631         | 19900252 | A | 0.5  | 0.4286 | G |
| 20 | TIGRP2P271747_rs9094890 | 19920233 | A | 0.5  | 0.4286 | G |
| 20 | BICF2G630229683         | 19925428 | A | 0.25 | 0.2857 | G |
| 20 | BICF2P409678            | 19940390 | A | 0.25 | 0.2857 | G |
| 20 | BICF2G630229713         | 19949495 | A | 0.5  | 0.4286 | G |
| 20 | BICF2G630229725         | 19953135 | A | 0.5  | 0.4286 | C |
| 20 | TIGRP2P271755_rs9143844 | 19967848 | A | 0.5  | 0.4167 | G |
| 20 | BICF2S24313933          | 19979247 | A | 0    | 0      | G |
| 20 | BICF2S23120323          | 19988394 | A | 0    | 0      | G |
| 20 | BICF2P200263            | 19999047 | G | 0.25 | 0.2857 | A |
| 20 | BICF2G630229767         | 20011971 | A | 0    | 0      | G |
| 20 | BICF2P673920            | 20022013 | A | 0.5  | 0.4286 | G |
| 20 | BICF2G630229791         | 20035634 | G | 0    | 0.1429 | A |
| 20 | BICF2G630229812         | 20044741 | G | 0    | 0      | A |
| 20 | BICF2G630229829         | 20057107 | A | 0.5  | 0.4286 | G |
| 20 | BICF2G630229859         | 20068610 | C | 0.5  | 0.4286 | A |
| 20 | TIGRP2P271765_rs9078007 | 20083418 | G | 0.5  | 0.4286 | A |
| 20 | BICF2P9200              | 20097341 | G | 0.75 | 0.8571 | C |
| 20 | BICF2G630229869         | 20106506 | A | 0.5  | 0.5714 | G |
| 20 | BICF2P255275            | 20133461 | A | 0.5  | 0.4286 | G |
| 20 | BICF2G630229920         | 20150369 | A | 0.5  | 0.4286 | G |
| 20 | BICF2P412005            | 20159880 | A | 0    | 0      | G |
| 20 | BICF2G630229945         | 20173168 | A | 0.75 | 0.7143 | G |
| 20 | BICF2G630229958         | 20183985 | A | 0    | 0      | G |
| 20 | BICF2G630229970         | 20197559 | A | 0    | 0      | C |
| 20 | BICF2G630229984         | 20212900 | G | 0    | 0      | A |
| 20 | BICF2P332466            | 20240959 | A | 0    | 0      | G |
| 20 | BICF2G630230000         | 20262115 | G | 0    | 0      | C |
| 20 | BICF2G630230013         | 20276937 | A | 0    | 0      | G |
| 20 | BICF2G630230039         | 20291680 | G | 1    | 1      | A |
| 20 | BICF2P1316220           | 20306519 | C | 0    | 0      | A |
| 20 | BICF2G630230057         | 20314101 | A | 0    | 0      | G |
| 20 | BICF2G630230078         | 20321606 | G | 0.75 | 0.7143 | A |
| 20 | BICF2P829932            | 20336640 | A | 0    | 0      | C |
| 20 | BICF2G630230099         | 20345084 | A | 0    | 0      | G |
| 20 | BICF2G630230119         | 20355298 | G | 0    | 0      | A |
| 20 | BICF2P318072            | 20356691 | A | 1    | 1      | G |
| 20 | TIGRP2P271821_rs8620574 | 20374994 | T | 0.25 | 0.2857 | A |
| 20 | BICF2G630230163         | 20381498 | A | 0    | 0      | T |
| 20 | TIGRP2P271827_rs8577342 | 20390156 | G | 0    | 0      | A |
| 20 | BICF2P1188349           | 20396381 | G | 0.25 | 0.2857 | A |
| 20 | BICF2P80166             | 20404051 | 0 | 0    | 0      | C |
| 20 | BICF2G630230214         | 20420953 | G | 0    | 0      | A |
| 20 | BICF2P470910            | 20428946 | A | 0.25 | 0.25   | G |
| 20 | BICF2S23013978          | 20435538 | C | 0.25 | 0.2857 | A |
| 20 | BICF2G630230249         | 20449477 | G | 0    | 0      | A |

|    |                         |          |   |      |        |   |
|----|-------------------------|----------|---|------|--------|---|
| 20 | BICF2G630230266         | 20459380 | A | 1    | 1      | G |
| 20 | BICF2S23632282          | 20471406 | G | 0    | 0      | A |
| 20 | BICF2P259042            | 20474773 | G | 0    | 0      | A |
| 20 | BICF2G630230314         | 20482050 | A | 0    | 0      | G |
| 20 | BICF2P219762            | 20493735 | A | 1    | 0.8    | G |
| 20 | BICF2G630230341         | 20503262 | G | 0    | 0      | C |
| 20 | BICF2G630230347         | 20505582 | G | 0    | 0      | A |
| 20 | BICF2S2453438           | 20535026 | G | 0    | 0      | A |
| 20 | BICF2G630230383         | 20535667 | A | 1    | 1      | G |
| 20 | BICF2G630230390         | 20539359 | G | 0    | 0      | C |
| 20 | BICF2G630230405         | 20551451 | A | 1    | 1      | C |
| 20 | BICF2G630230429         | 20567506 | A | 0.25 | 0.2857 | G |
| 20 | BICF2G630230435         | 20576861 | A | 0.25 | 0.2857 | C |
| 20 | BICF2G630230443         | 20590447 | A | 0.25 | 0.2857 | G |
| 20 | BICF2G630230455         | 20607954 | A | 0.25 | 0.2857 | G |
| 20 | BICF2G630230459         | 20614764 | A | 0.25 | 0.2857 | G |
| 20 | BICF2S22912150          | 20620484 | G | 0.75 | 0.7143 | A |
| 20 | BICF2G630230478         | 20638593 | A | 0.75 | 0.7143 | G |
| 20 | TIGRP2P271905_rs8779987 | 20642632 | A | 0.25 | 0.2857 | G |
| 20 | BICF2G630230511         | 20663885 | A | 0.75 | 0.7143 | C |
| 20 | BICF2G630230512         | 20666626 | A | 1    | 1      | G |
| 20 | BICF2G630230544         | 20677076 | A | 0    | 0      | G |
| 20 | TIGRP2P271914_rs8852911 | 20691613 | A | 0.25 | 0.2857 | G |
| 20 | BICF2S23218039          | 20703082 | G | 0    | 0      | A |
| 20 | BICF2P372477            | 20714361 | G | 0.75 | 0.8571 | A |
| 20 | BICF2G630230582         | 20723108 | 0 | 0    | 0      | G |
| 20 | BICF2G630230595         | 20736559 | G | 0.5  | 0.5714 | A |
| 20 | TIGRP2P271933_rs8884088 | 20746926 | A | 0.25 | 0.3571 | C |
| 20 | TIGRP2P271937_rs8758083 | 20758485 | G | 0    | 0      | A |
| 20 | BICF2P609633            | 20769485 | G | 0    | 0      | A |
| 20 | BICF2P455931            | 20780623 | A | 0    | 0      | C |
| 20 | BICF2P784838            | 20798941 | A | 0    | 0      | T |
| 20 | BICF2S23735843          | 20803590 | A | 0.5  | 0.5    | G |
| 20 | BICF2G630230604         | 20818938 | A | 0.5  | 0.5    | G |
| 20 | BICF2P1011372           | 20827026 | C | 0    | 0      | A |
| 20 | BICF2P414549            | 20840993 | A | 0    | 0      | C |
| 20 | TIGRP2P271975_rs8822880 | 20855100 | A | 0    | 0      | G |
| 20 | BICF2P1321436           | 20864676 | A | 0.5  | 0.5    | G |
| 20 | TIGRP2P271979_rs8544396 | 20877719 | G | 0.5  | 0.5    | A |
| 20 | BICF2S23512737          | 20885459 | A | 0.5  | 0.5    | G |
| 20 | BICF2S2453843           | 20905089 | A | 0.5  | 0.5    | G |
| 20 | BICF2P1445116           | 20917664 | 0 | 0    | 0      | G |
| 20 | BICF2P1445115           | 20918888 | A | 1    | 1      | G |
| 20 | TIGRP2P271999_rs9181825 | 20934242 | 0 | 0    | 0      | G |
| 20 | BICF2P1105256           | 20942967 | 0 | 0    | 0      | G |
| 20 | BICF2G630230641         | 20955042 | C | 1    | 1      | A |
| 20 | BICF2P279686            | 20974162 | G | 1    | 1      | A |



|    |                         |          |   |     |     |   |
|----|-------------------------|----------|---|-----|-----|---|
| 20 | BICF2G630230672         | 20978871 | C | 0   | 0   | A |
| 20 | BICF2G630230695         | 20987954 | G | 1   | 1   | A |
| 20 | BICF2G630230713         | 21000192 | G | 0   | 0   | A |
| 20 | BICF2G630230741         | 21013158 | A | 0   | 0   | G |
| 20 | BICF2G630230765         | 21024636 | A | 0   | 0   | C |
| 20 | BICF2G630230774         | 21038881 | A | 0   | 0   | C |
| 20 | BICF2G630230776         | 21052092 | A | 0   | 0   | G |
| 20 | BICF2G630230788         | 21061771 | A | 0   | 0   | G |
| 20 | BICF2G630230791         | 21069698 | C | 0.5 | 0.5 | A |
| 20 | BICF2G630230797         | 21079677 | A | 0.5 | 0.5 | G |
| 20 | BICF2G630230812         | 21093636 | A | 0   | 0   | G |
| 20 | BICF2G630230824         | 21102519 | A | 0   | 0   | G |
| 20 | BICF2G630230834         | 21118869 | G | 0   | 0   | A |
| 20 | BICF2G630230849         | 21127595 | G | 0.5 | 0.5 | A |
| 20 | BICF2G630230872         | 21148393 | G | 0.5 | 0.5 | A |
| 20 | BICF2G630230874         | 21154534 | A | 0.5 | 0.5 | G |
| 20 | BICF2G630230883         | 21160376 | A | 0   | 0   | G |
| 20 | BICF2P1232013           | 21161012 | G | 0.5 | 0.5 | A |
| 20 | BICF2G630230888         | 21166328 | A | 0   | 0   | C |
| 20 | BICF2G630230904         | 21174770 | A | 0   | 0   | G |
| 20 | BICF2G630230916         | 21186367 | G | 0.5 | 0.5 | A |
| 20 | BICF2G630230933         | 21197991 | G | 0.5 | 0.5 | A |
| 20 | TIGRP2P272013_rs8935723 | 21217684 | A | 0   | 0   | G |
| 20 | BICF2G630231001         | 21229939 | G | 0   | 0   | A |
| 20 | BICF2G630231013         | 21248671 | G | 0.5 | 0.5 | A |
| 20 | BICF2S229416            | 21255789 | G | 0   | 0   | A |
| 20 | BICF2P475108            | 21265399 | G | 0.5 | 0.5 | A |
| 20 | BICF2S23749939          | 21296875 | A | 0   | 0   | C |
| 20 | BICF2S22938875          | 21307709 | A | 0   | 0   | G |
| 20 | TIGRP2P272022_rs8827412 | 21317234 | A | 1   | 1   | G |
| 20 | BICF2G630231028         | 21329794 | G | 0   | 0   | A |
| 20 | BICF2G630231038         | 21338097 | G | 0   | 0   | A |
| 20 | BICF2P70766             | 21347286 | 0 | 0   | 0   | A |
| 20 | BICF2G630231052         | 21347563 | G | 0   | 0   | A |
| 20 | BICF2S23126054          | 21364570 | C | 0   | 0   | A |
| 20 | BICF2G630231064         | 21371815 | A | 0   | 0   | T |
| 20 | BICF2G630231068         | 21373086 | A | 0   | 0   | G |
| 20 | BICF2G630231100         | 21385920 | C | 0   | 0   | A |
| 20 | BICF2P994314            | 21390676 | A | 0.5 | 0.5 | G |
| 20 | BICF2G630231122         | 21402181 | A | 0   | 0   | G |
| 20 | BICF2G630231163         | 21417188 | A | 0   | 0   | C |
| 20 | BICF2G630231186         | 21428234 | A | 0   | 0   | G |
| 20 | BICF2G630231234         | 21446861 | A | 1   | 1   | G |
| 20 | BICF2G630231278         | 21456088 | T | 0.5 | 0.5 | A |
| 20 | BICF2G630231316         | 21471239 | C | 0.5 | 0.5 | A |
| 20 | BICF2G630231338         | 21482525 | A | 0   | 0   | G |
| 20 | BICF2G630231346         | 21495275 | A | 0.5 | 0.5 | G |

|    |                         |          |   |      |        |   |
|----|-------------------------|----------|---|------|--------|---|
| 20 | BICF2P172536            | 21512009 | G | 0    | 0      | A |
| 20 | BICF2P346403            | 21522986 | 0 | 0    | 0      | A |
| 20 | BICF2P839438            | 21542508 | 0 | 0    | 0      | C |
| 20 | BICF2P503283            | 21554994 | A | 0    | 0      | G |
| 20 | BICF2P294251            | 21574253 | A | 1    | 1      | C |
| 20 | BICF2P706952            | 21593435 | A | 0.5  | 0.5    | G |
| 20 | BICF2P850355            | 21597414 | A | 0.5  | 0.5    | G |
| 20 | BICF2P849536            | 21598821 | A | 0.5  | 0.5    | G |
| 20 | BICF2P487349            | 21614911 | A | 0.5  | 0.5    | G |
| 20 | BICF2G630231363         | 21628197 | G | 0    | 0      | A |
| 20 | BICF2S23323353          | 21636168 | 0 | 0    | 0      | A |
| 20 | BICF2P858067            | 21644280 | A | 0.5  | 0.5    | G |
| 20 | BICF2S23112038          | 21656120 | A | 0    | 0      | G |
| 20 | TIGRP2P272049_rs9183468 | 21675819 | A | 0.5  | 0.5    | C |
| 20 | BICF2S2344498           | 21682709 | G | 0.5  | 0.5    | A |
| 20 | BICF2S24319682          | 21691275 | A | 0.5  | 0.5    | G |
| 20 | BICF2P348989            | 21703723 | G | 0    | 0      | A |
| 20 | BICF2P268009            | 21713957 | A | 0.25 | 0.2143 | C |
| 20 | BICF2P974307            | 21729696 | G | 0.25 | 0.2143 | A |
| 20 | BICF2P632747            | 21739165 | A | 0.25 | 0.2143 | G |
| 20 | BICF2P1039708           | 21762274 | G | 0.5  | 0.5    | A |
| 20 | BICF2S23721855          | 21772025 | T | 0.25 | 0.2857 | A |
| 20 | BICF2P1444644           | 21786106 | G | 0.75 | 0.7143 | A |
| 20 | BICF2P335821            | 21802374 | G | 0    | 0      | A |
| 20 | BICF2G630231373         | 21803916 | G | 0.25 | 0.2143 | A |
| 20 | BICF2G630231375         | 21805002 | A | 0    | 0      | C |
| 20 | BICF2G630231394         | 21818322 | G | 0.75 | 0.7143 | A |
| 20 | BICF2G630231409         | 21828339 | G | 0.75 | 0.7143 | A |
| 20 | BICF2G630231426         | 21841590 | G | 0.25 | 0.2857 | A |
| 20 | BICF2P1243140           | 21850564 | G | 0.25 | 0.2143 | A |
| 20 | BICF2G630231444         | 21866957 | A | 0.5  | 0.5    | G |
| 20 | BICF2G630231458         | 21880456 | A | 0.5  | 0.5    | G |
| 20 | BICF2P746437            | 21896665 | A | 0.25 | 0.2857 | G |
| 20 | BICF2P944082            | 21908246 | 0 | 0    | 0      | A |
| 20 | BICF2P1261800           | 21920288 | A | 0.75 | 0.7143 | G |
| 20 | TIGRP2P272116_rs9019485 | 21940815 | C | 0.5  | 0.5    | A |
| 20 | BICF2P287463            | 21942760 | G | 0.25 | 0.25   | A |
| 20 | BICF2G630231493         | 21945552 | G | 0    | 0      | A |
| 20 | BICF2G630231515         | 21959619 | A | 0.25 | 0.2857 | G |
| 20 | BICF2G630231521         | 21966510 | A | 0.75 | 0.7143 | G |
| 20 | BICF2G630231538         | 21981526 | A | 0.5  | 0.5    | G |
| 20 | BICF2G630231546         | 21988749 | A | 0.75 | 0.7143 | C |
| 20 | BICF2G630231584         | 22021726 | A | 0.25 | 0.2143 | C |
| 20 | BICF2G630231592         | 22027992 | A | 0    | 0      | G |
| 20 | BICF2G630231620         | 22039565 | A | 0.75 | 0.7143 | G |
| 20 | BICF2G630231640         | 22048526 | G | 0.5  | 0.5    | A |
| 20 | BICF2G630231649         | 22056127 | A | 0.25 | 0.2857 | G |

|    |                         |          |   |      |        |   |
|----|-------------------------|----------|---|------|--------|---|
| 20 | BICF2G630231652         | 22057985 | A | 0.25 | 0.2857 | G |
| 20 | BICF2P1454611           | 22076974 | G | 0.5  | 0.5    | A |
| 20 | BICF2P1134952           | 22081191 | G | 0.5  | 0.5    | A |
| 20 | TIGRP2P272138_rs8708509 | 22093734 | 0 | 0    | 0      | G |
| 20 | BICF2P1206054           | 22107092 | G | 0    | 0      | A |
| 20 | BICF2G630231674         | 22116050 | A | 0    | 0      | G |
| 20 | BICF2G630231681         | 22171832 | A | 0.75 | 0.7143 | G |
| 20 | BICF2G630231687         | 22172485 | G | 0.75 | 0.7143 | A |
| 20 | BICF2P1107504           | 22186989 | A | 0    | 0      | G |
| 20 | BICF2G630231692         | 22189443 | A | 0.25 | 0.2857 | C |
| 20 | BICF2P407667            | 22193272 | A | 0    | 0      | G |
| 20 | BICF2G630231696         | 22195187 | G | 0.25 | 0.2857 | A |
| 20 | BICF2G630231722         | 22215342 | G | 0    | 0      | A |
| 20 | BICF2G630231739         | 22227651 | A | 0    | 0      | C |
| 20 | BICF2P908563            | 22238761 | A | 0    | 0      | G |
| 20 | BICF2P915403            | 22243546 | A | 0    | 0      | G |
| 20 | BICF2P1303641           | 22262497 | A | 0.5  | 0.5    | G |
| 20 | BICF2P1303645           | 22264144 | C | 0    | 0      | G |
| 20 | BICF2P658098            | 22277510 | G | 0    | 0      | A |
| 20 | BICF2S2305657           | 22296754 | A | 0    | 0      | C |
| 20 | TIGRP2P272167_rs8823482 | 22301051 | G | 0.75 | 0.75   | A |
| 20 | BICF2G630231800         | 22322452 | A | 0    | 0      | G |
| 20 | BICF2S23028343          | 22333548 | A | 0.25 | 0.2143 | T |
| 20 | BICF2G630231807         | 22353425 | A | 0    | 0      | G |
| 20 | BICF2P1360834           | 22360627 | A | 0    | 0      | G |
| 20 | BICF2G630231830         | 22390214 | A | 0.25 | 0.2143 | G |
| 20 | TIGRP2P272179_rs9172293 | 22398043 | A | 0    | 0      | G |
| 20 | BICF2G630231842         | 22412204 | T | 0.5  | 0.5    | A |
| 20 | BICF2G630231846         | 22421822 | A | 0    | 0      | G |
| 20 | BICF2G630231856         | 22425279 | G | 0    | 0      | A |
| 20 | BICF2P539207            | 22451008 | A | 0.75 | 0.7857 | G |
| 20 | BICF2S22923283          | 22466948 | G | 0.75 | 0.7857 | A |
| 20 | BICF2G630231879         | 22480115 | A | 0    | 0      | G |
| 20 | BICF2S23144251          | 22488797 | 0 | 0    | 0      | C |
| 20 | BICF2P1022368           | 22492703 | A | 0    | 0      | G |
| 20 | BICF2G630231899         | 22498529 | 0 | 0    | 0      | G |
| 20 | BICF2G630231904         | 22512719 | G | 0    | 0      | A |
| 20 | BICF2G630231913         | 22517259 | G | 0    | 0      | A |
| 20 | BICF2G630231925         | 22519269 | A | 0    | 0      | G |
| 20 | BICF2G630231938         | 22529241 | A | 0.75 | 0.7143 | G |
| 20 | BICF2S23650391          | 22533963 | A | 0.75 | 0.7143 | G |
| 20 | BICF2G630231939         | 22542247 | 0 | 0    | 0      | G |
| 20 | BICF2G630231962         | 22571376 | C | 0.25 | 0.2143 | A |
| 20 | BICF2S23761746          | 22571717 | A | 0.5  | 0.5    | G |
| 20 | BICF2G630231970         | 22575516 | A | 0    | 0      | G |
| 20 | BICF2G630231975         | 22583037 | C | 0.25 | 0.2143 | A |
| 20 | BICF2P251164            | 22589907 | 0 | 0    | 0      | G |

|    |                         |          |   |      |        |   |
|----|-------------------------|----------|---|------|--------|---|
| 20 | BICF2G630231981         | 22600555 | 0 | 0    | 0      | G |
| 20 | BICF2P754035            | 22620412 | 0 | 0    | 0      | C |
| 20 | BICF2G630231983         | 22622764 | A | 0.25 | 0.2857 | G |
| 20 | BICF2G630231989         | 22643273 | A | 0.25 | 0.2143 | G |
| 20 | BICF2S23421743          | 22645484 | A | 1    | 1      | G |
| 20 | TIGRP2P272200_rs8852456 | 22660524 | A | 0.5  | 0.5    | G |
| 20 | BICF2G630232004         | 22674410 | A | 0.5  | 0.5    | C |
| 20 | BICF2G630232029         | 22686840 | G | 0.5  | 0.5    | A |
| 20 | BICF2G630232045         | 22694036 | C | 0.25 | 0.2143 | A |
| 20 | BICF2G630232054         | 22702572 | A | 0.5  | 0.5    | G |
| 20 | BICF2G630232073         | 22717069 | C | 0.5  | 0.5    | A |
| 20 | BICF2G630232085         | 22725508 | A | 0.5  | 0.5    | G |
| 20 | BICF2G630232094         | 22737311 | A | 0.5  | 0.5    | G |
| 20 | BICF2G630232097         | 22738782 | A | 0.25 | 0.2143 | C |
| 20 | TIGRP2P272209_rs8631283 | 22752895 | A | 0    | 0      | G |
| 20 | BICF2P1249701           | 22756369 | A | 0.25 | 0.2857 | G |
| 20 | BICF2G630232110         | 22780314 | C | 0.25 | 0.2143 | A |
| 20 | BICF2G630232116         | 22782690 | A | 0.75 | 0.7857 | G |
| 20 | BICF2P1375659           | 22786981 | A | 0    | 0      | G |
| 20 | BICF2G630232119         | 22787491 | G | 0    | 0      | A |
| 20 | BICF2G630232129         | 22796625 | A | 0    | 0      | G |
| 20 | BICF2G630232130         | 22806318 | G | 0.25 | 0.2857 | A |
| 20 | BICF2G630232143         | 22822151 | A | 0    | 0      | G |
| 20 | TIGRP2P272232_rs8839085 | 22829639 | A | 0.25 | 0.2143 | G |
| 20 | BICF2G630232173         | 22854601 | A | 0    | 0      | G |
| 20 | BICF2G630232190         | 22867607 | G | 0.25 | 0.2857 | A |
| 20 | BICF2G630232213         | 22878297 | A | 0.25 | 0.2857 | G |
| 20 | BICF2G630232220         | 22888455 | A | 0    | 0      | G |
| 20 | BICF2G630232229         | 22907125 | C | 0.5  | 0.5    | A |
| 20 | BICF2G630232232         | 22908046 | A | 0    | 0      | G |
| 20 | BICF2P759360            | 22920304 | A | 0.5  | 0.5    | G |
| 20 | BICF2G630232272         | 22932468 | G | 0.75 | 0.7143 | A |
| 20 | BICF2P642402            | 22937074 | G | 0.25 | 0.2857 | A |
| 20 | BICF2P1393219           | 22944124 | G | 0.75 | 0.7857 | A |
| 20 | BICF2G630232301         | 22954951 | A | 0.25 | 0.2857 | G |
| 20 | BICF2S22919023          | 22968790 | 0 | 0    | 0      | A |
| 20 | TIGRP2P272288_rs9192801 | 22994258 | A | 0    | 0      | G |
| 20 | BICF2G630232326         | 23005636 | A | 0    | 0      | G |
| 20 | BICF2G630232347         | 23020656 | C | 0    | 0      | A |
| 20 | BICF2S23032309          | 23030731 | A | 0    | 0      | G |
| 20 | BICF2G630232363         | 23034742 | G | 0    | 0      | A |
| 20 | BICF2G630232384         | 23055493 | A | 0    | 0      | G |
| 20 | BICF2G630232400         | 23062280 | A | 0    | 0      | C |
| 20 | BICF2G630232412         | 23071995 | A | 0    | 0      | G |
| 20 | BICF2G630232438         | 23080587 | A | 0    | 0      | G |
| 20 | BICF2G630232439         | 23081624 | A | 0    | 0      | G |
| 20 | BICF2P552215            | 23081871 | G | 0    | 0      | A |

|    |                         |          |   |      |        |   |
|----|-------------------------|----------|---|------|--------|---|
| 20 | BICF2P425893            | 23091687 | A | 0    | 0      | C |
| 20 | BICF2G630232456         | 23092264 | A | 0.25 | 0.2143 | G |
| 20 | BICF2G630232458         | 23095965 | G | 0    | 0      | A |
| 20 | TIGRP2P272326_rs8947507 | 23106292 | G | 0    | 0      | A |
| 20 | TIGRP2P272327_rs8947515 | 23106387 | G | 0    | 0      | A |
| 20 | TIGRP2P272331_rs8986936 | 23116486 | A | 0    | 0      | G |
| 20 | BICF2G630232505         | 23129971 | G | 0    | 0      | A |
| 20 | BICF2G630232530         | 23144697 | C | 0    | 0      | A |
| 20 | BICF2G630232546         | 23150869 | A | 0.75 | 0.7143 | G |
| 20 | TIGRP2P272344_rs8751985 | 23161204 | A | 0.25 | 0.2143 | G |
| 20 | BICF2G630232568         | 23175158 | A | 1    | 1      | G |
| 20 | BICF2G630232580         | 23185120 | G | 0.5  | 0.5    | A |
| 20 | BICF2G630232595         | 23196680 | G | 0.25 | 0.25   | A |
| 20 | BICF2G630232637         | 23211356 | C | 0    | 0      | A |
| 20 | TIGRP2P272370_rs8648730 | 23228795 | G | 0.25 | 0.2143 | A |
| 20 | BICF2P1238392           | 23228864 | A | 0    | 0      | G |
| 20 | BICF2G630232660         | 23230042 | A | 0.25 | 0.2143 | G |
| 20 | BICF2G630232686         | 23246611 | G | 0    | 0      | A |
| 20 | BICF2G630232716         | 23266336 | A | 0    | 0      | G |
| 20 | BICF2P431193            | 23280938 | G | 0.5  | 0.5    | A |
| 20 | BICF2G630232756         | 23298148 | A | 0    | 0      | G |
| 20 | BICF2G630232763         | 23300036 | G | 0.75 | 0.7857 | A |
| 20 | BICF2S2351521           | 23310648 | G | 0.75 | 0.7143 | A |
| 20 | BICF2G630232772         | 23332815 | C | 0.5  | 0.5    | A |
| 20 | BICF2G630232773         | 23334632 | A | 0.5  | 0.5    | G |
| 20 | BICF2G630232788         | 23349669 | A | 0    | 0      | C |
| 20 | BICF2G630232796         | 23365459 | G | 0    | 0      | A |
| 20 | BICF2G630232799         | 23369926 | A | 0    | 0      | G |
| 20 | BICF2S23632983          | 23382390 | C | 0.25 | 0.2143 | A |
| 20 | BICF2G630232823         | 23394414 | A | 0.75 | 0.7857 | G |
| 20 | BICF2G630232841         | 23407633 | A | 0.5  | 0.5    | G |
| 20 | BICF2P524748            | 23422549 | G | 1    | 1      | A |
| 20 | BICF2G630232855         | 23428139 | G | 0.5  | 0.5    | A |
| 20 | BICF2G630232862         | 23437965 | A | 0    | 0      | G |
| 20 | BICF2P664829            | 23448683 | A | 0.25 | 0.2857 | G |
| 20 | BICF2G630232893         | 23465674 | C | 0.75 | 0.7143 | G |
| 20 | BICF2P1110102           | 23473186 | A | 0.25 | 0.2143 | C |
| 20 | BICF2G630232906         | 23487798 | G | 0.5  | 0.5    | A |
| 20 | BICF2G630232916         | 23504106 | C | 0    | 0      | G |
| 20 | BICF2G630232922         | 23508017 | A | 0.25 | 0.2857 | G |
| 20 | BICF2G630232936         | 23516548 | A | 0.25 | 0.2143 | G |
| 20 | BICF2G630232945         | 23523161 | G | 0.25 | 0.2143 | A |
| 20 | BICF2G630232957         | 23531019 | G | 0.25 | 0.2143 | A |
| 20 | BICF2G630232963         | 23541484 | G | 0.75 | 0.7143 | A |
| 20 | TIGRP2P272413_rs8954893 | 23554838 | A | 0.25 | 0.2857 | T |
| 20 | TIGRP2P272419_rs8893890 | 23558530 | A | 0.5  | 0.5    | G |
| 20 | BICF2S2339957           | 23565097 | A | 0    | 0      | G |

|    |                         |          |   |      |        |   |
|----|-------------------------|----------|---|------|--------|---|
| 20 | BICF2P1115099           | 23572573 | A | 0.75 | 0.7857 | G |
| 20 | BICF2G630232997         | 23579342 | C | 0    | 0      | A |
| 20 | BICF2S23747238          | 23587713 | A | 0    | 0      | G |
| 20 | BICF2G630233026         | 23598947 | A | 0.25 | 0.2143 | G |
| 20 | BICF2G630233039         | 23608552 | A | 0.5  | 0.5    | G |
| 20 | BICF2G630233041         | 23610066 | A | 0.25 | 0.2143 | G |
| 20 | BICF2G630233055         | 23624426 | G | 0.25 | 0.2857 | A |
| 20 | BICF2G630233057         | 23625891 | C | 0.5  | 0.5    | A |
| 20 | BICF2G630233071         | 23632762 | G | 0    | 0      | A |
| 20 | BICF2G630233096         | 23655070 | G | 0.5  | 0.5    | A |
| 20 | BICF2G630233104         | 23666600 | A | 0    | 0      | G |
| 20 | BICF2S23519852          | 23676422 | A | 0    | 0      | C |
| 20 | BICF2P594369            | 23686196 | C | 0.75 | 0.7143 | G |
| 20 | BICF2G630233108         | 23697631 | A | 0.75 | 0.7143 | G |
| 20 | BICF2G630233110         | 23702808 | G | 0.75 | 0.7143 | A |
| 20 | BICF2P399305            | 23719551 | A | 1    | 1      | G |
| 20 | BICF2G630233123         | 23730950 | G | 0.5  | 0.5    | A |
| 20 | BICF2S23317741          | 23737909 | A | 0    | 0      | G |
| 20 | BICF2P1098098           | 23757409 | A | 0.75 | 0.7857 | G |
| 20 | BICF2G630233132         | 23759732 | G | 0.25 | 0.2857 | A |
| 20 | BICF2P1178111           | 23775121 | A | 0.25 | 0.2857 | C |
| 20 | BICF2G630233138         | 23782081 | A | 0.25 | 0.2857 | C |
| 20 | TIGRP2P272442_rs9114642 | 23787664 | A | 0.75 | 0.7143 | G |
| 20 | BICF2G630233142         | 23793631 | G | 0.5  | 0.5    | A |
| 20 | BICF2S23243984          | 23805431 | A | 0.25 | 0.2143 | G |
| 20 | BICF2G630233156         | 23820780 | G | 0.25 | 0.2857 | A |
| 20 | BICF2S23345078          | 23836889 | A | 0    | 0      | C |
| 20 | BICF2G630233162         | 23849423 | A | 0    | 0      | C |
| 20 | BICF2G630233165         | 23854036 | G | 0    | 0      | A |
| 20 | BICF2G630233182         | 23865217 | G | 0.5  | 0.5    | A |
| 20 | BICF2P426402            | 23894819 | T | 0.5  | 0.5    | A |
| 20 | BICF2P894202            | 23897194 | A | 0.5  | 0.5    | G |
| 20 | BICF2P618139            | 23915230 | A | 0    | 0      | G |
| 20 | BICF2G630233208         | 23920469 | A | 0.5  | 0.5    | G |
| 20 | TIGRP2P272462_rs8635671 | 23941366 | A | 0    | 0      | G |
| 20 | BICF2G630233215         | 23943238 | A | 0    | 0      | T |
| 20 | BICF2P1038586           | 23961703 | A | 0    | 0      | G |
| 20 | BICF2G630233240         | 23968534 | C | 0    | 0      | A |
| 20 | BICF2G630233259         | 23982779 | A | 0    | 0      | G |
| 20 | BICF2G630233266         | 23991548 | G | 0    | 0      | A |
| 20 | BICF2P953719            | 24002538 | 0 | 0    | 0      | A |
| 20 | BICF2P1369602           | 24014292 | 0 | 0    | 0      | A |
| 20 | TIGRP2P272479_rs8674902 | 24027068 | 0 | 0    | 0      | G |
| 20 | BICF2G630233275         | 24073446 | A | 0    | 0      | G |
| 20 | BICF2P1145086           | 24087190 | 0 | 0    | 0      | G |
| 20 | BICF2G630233283         | 24092588 | G | 0.25 | 0.2857 | A |
| 20 | BICF2G630233296         | 24105384 | A | 1    | 1      | G |

|    |                         |          |   |      |        |   |
|----|-------------------------|----------|---|------|--------|---|
| 20 | BICF2G630233317         | 24119849 | A | 0    | 0      | C |
| 20 | TIGRP2P272509_rs9107185 | 24130882 | C | 0    | 0      | A |
| 20 | BICF2S23630408          | 24149272 | A | 0.25 | 0.2857 | G |
| 20 | BICF2G630233332         | 24150120 | A | 0.25 | 0.1429 | G |
| 20 | BICF2G630233337         | 24167388 | A | 0    | 0      | G |
| 20 | BICF2S23141368          | 24174125 | G | 0    | 0      | A |
| 20 | BICF2G630233351         | 24195708 | A | 0.5  | 0.5714 | G |
| 20 | BICF2G630233352         | 24196200 | A | 0.5  | 0.5714 | G |
| 20 | BICF2G630233367         | 24208235 | A | 0.5  | 0.4286 | G |
| 20 | BICF2G630233384         | 24237132 | A | 0.5  | 0.4286 | G |
| 20 | BICF2G630233388         | 24243970 | C | 0.5  | 0.4286 | A |
| 20 | BICF2P335579            | 24264455 | A | 0    | 0      | G |
| 20 | TIGRP2P272535_rs8760279 | 24267036 | G | 0    | 0      | A |
| 20 | BICF2G630233421         | 24283931 | A | 0    | 0      | C |
| 20 | BICF2G630233422         | 24284132 | C | 0    | 0      | G |
| 20 | BICF2G630233460         | 24310258 | A | 0    | 0      | C |
| 20 | BICF2G630233464         | 24312191 | A | 0    | 0      | G |
| 20 | BICF2G630233473         | 24324423 | G | 0.25 | 0.1429 | A |
| 20 | BICF2G630233484         | 24339347 | C | 0    | 0      | A |
| 20 | TIGRP2P272545_rs9066838 | 24353913 | G | 0.25 | 0.1429 | A |
| 20 | BICF2G630233493         | 24359314 | G | 0.25 | 0.2857 | A |
| 20 | BICF2G630233506         | 24371012 | G | 0    | 0      | A |
| 20 | TIGRP2P272551_rs8725268 | 24383286 | C | 0.25 | 0.1429 | A |
| 20 | BICF2G630233512         | 24393885 | 0 | 0    | 0      | A |
| 20 | BICF2G630233533         | 24408235 | A | 0.5  | 0.4286 | G |
| 20 | BICF2G630233549         | 24414233 | G | 0.5  | 0.5714 | A |
| 20 | BICF2G630233552         | 24416836 | G | 0.5  | 0.5714 | A |
| 20 | TIGRP2P272557_rs9125147 | 24426090 | C | 0.25 | 0.2857 | A |
| 20 | TIGRP2P272561_rs9197581 | 24439202 | C | 1    | 1      | A |
| 20 | BICF2P1322851           | 24458952 | G | 0.75 | 0.8571 | A |
| 20 | BICF2P212740            | 24462726 | 0 | 0    | 0      | G |
| 20 | BICF2S23915724          | 24482608 | C | 0.75 | 0.8571 | A |
| 20 | BICF2G630233604         | 24493318 | 0 | 0    | 0      | G |
| 20 | BICF2P550929            | 24500608 | A | 0.25 | 0.1429 | G |
| 20 | BICF2G630233615         | 24507569 | 0 | 0    | 0      | G |
| 20 | TIGRP2P272577_rs8808055 | 24520214 | A | 0    | 0      | G |
| 20 | BICF2S23214340          | 24536574 | G | 0    | 0      | A |
| 20 | BICF2P357520            | 24561740 | A | 1    | 1      | G |
| 20 | TIGRP2P272604_rs8593393 | 24570832 | 0 | 0    | 0      | G |
| 20 | BICF2P333288            | 24580266 | 0 | 0    | 0      | A |
| 20 | BICF2P616686            | 24588076 | A | 0    | 0      | G |
| 20 | BICF2P485114            | 24617066 | 0 | 0    | 0      | C |
| 20 | BICF2P636972            | 24633739 | A | 0.75 | 0.8571 | G |
| 20 | TIGRP2P272619_rs8713253 | 24646984 | 0 | 0    | 0      | A |
| 20 | TIGRP2P272624_rs8804915 | 24664246 | A | 0    | 0      | G |
| 20 | TIGRP2P272629_rs9225293 | 24672630 | G | 0.75 | 0.8571 | A |
| 20 | BICF2G630233639         | 24681370 | 0 | 0    | 0      | G |

|    |                         |          |   |      |        |   |
|----|-------------------------|----------|---|------|--------|---|
| 20 | BICF2S22925547          | 24694724 | C | 1    | 1      | A |
| 20 | BICF2P324712            | 24704914 | A | 0.25 | 0.1429 | G |
| 20 | BICF2P1215624           | 24718675 | A | 1    | 1      | G |
| 20 | BICF2G630233641         | 24732940 | A | 0    | 0      | C |
| 20 | BICF2G630233644         | 24737218 | A | 0    | 0      | C |
| 20 | BICF2S23644777          | 24753080 | G | 1    | 1      | A |
| 20 | BICF2P124383            | 24763471 | 0 | 0    | 0      | C |
| 20 | BICF2G630233663         | 24772972 | A | 0.75 | 0.8571 | G |
| 20 | BICF2G630233670         | 24786916 | 0 | 0    | 0      | A |
| 20 | BICF2G630233677         | 24804061 | G | 0.75 | 0.8571 | A |
| 20 | BICF2G630233682         | 24812270 | A | 0.75 | 0.8571 | C |
| 20 | BICF2G630233693         | 24820424 | G | 0.75 | 0.8571 | A |
| 20 | BICF2P279876            | 24841077 | A | 0.75 | 0.8571 | G |
| 20 | TIGRP2P272658_rs8519356 | 24852331 | G | 0    | 0.2143 | A |
| 20 | BICF2G630233713         | 24868338 | A | 0.75 | 0.8571 | C |
| 20 | BICF2G630233714         | 24876053 | C | 0    | 0      | A |
| 20 | BICF2G630233719         | 24889547 | A | 0.75 | 0.8571 | G |
| 20 | BICF2G630233734         | 24900836 | C | 1    | 1      | A |
| 20 | BICF2G630233742         | 24934502 | G | 0    | 0      | A |
| 20 | BICF2S23315454          | 24945624 | C | 0    | 0      | A |
| 20 | BICF2G630233778         | 24963581 | G | 0    | 0      | A |
| 20 | BICF2G630233815         | 24987868 | A | 0    | 0      | G |
| 20 | TIGRP2P272673_rs9121188 | 24998683 | G | 0    | 0      | A |
| 20 | BICF2S23514997          | 25001832 | T | 1    | 1      | A |
| 20 | BICF2P529451            | 25013402 | G | 0    | 0      | A |
| 20 | BICF2G630233852         | 25028166 | G | 0    | 0      | A |
| 20 | BICF2G630233861         | 25042784 | G | 0    | 0      | A |
| 20 | TIGRP2P272678_rs9106873 | 25058176 | G | 0.75 | 0.8571 | A |
| 20 | BICF2S23534138          | 25060048 | A | 0    | 0      | C |
| 20 | BICF2G630233866         | 25083684 | A | 0    | 0      | G |
| 20 | BICF2P318776            | 25101570 | A | 0    | 0      | G |
| 20 | BICF2G630233888         | 25113760 | A | 0    | 0      | G |
| 20 | BICF2G630233908         | 25123036 | G | 0.25 | 0.1429 | A |
| 20 | BICF2G630233943         | 25138338 | A | 1    | 1      | G |
| 20 | BICF2G630233949         | 25141568 | A | 1    | 1      | G |
| 20 | BICF2S23319907          | 25165454 | A | 0    | 0      | G |
| 20 | BICF2S22962439          | 25176659 | A | 0    | 0      | G |
| 20 | BICF2P459981            | 25186759 | 0 | 0    | 0      | A |
| 20 | BICF2S23318610          | 25201728 | G | 0.25 | 0.1429 | A |
| 20 | BICF2P485982            | 25215637 | 0 | 0    | 0      | A |
| 20 | BICF2P142613            | 25221135 | C | 0.25 | 0.1429 | A |
| 20 | BICF2P646693            | 25233305 | A | 0    | 0      | G |
| 20 | BICF2S23320710          | 25244096 | G | 0    | 0      | A |
| 20 | BICF2P308593            | 25264897 | G | 0.75 | 0.7143 | A |
| 20 | BICF2S23752383          | 25282466 | A | 0.75 | 0.7143 | G |
| 20 | BICF2P2342              | 25289204 | G | 0.75 | 0.7143 | A |
| 20 | TIGRP2P272719_rs9014019 | 25300766 | A | 0    | 0      | G |



|    |                         |          |   |      |        |   |
|----|-------------------------|----------|---|------|--------|---|
| 20 | BICF2P1511957           | 25312927 | A | 1    | 1      | G |
| 20 | BICF2P601097            | 25328838 | G | 0    | 0      | A |
| 20 | BICF2G630233955         | 25337813 | 0 | 0    | 0      | G |
| 20 | BICF2S22934368          | 25350128 | A | 0    | 0      | G |
| 20 | BICF2P373083            | 25366478 | A | 0    | 0      | C |
| 20 | BICF2G630233966         | 25366589 | G | 0    | 0      | A |
| 20 | BICF2S23248988          | 25374774 | A | 0.25 | 0.1429 | G |
| 20 | BICF2G630233995         | 25377202 | G | 0    | 0.1429 | A |
| 20 | BICF2G630234008         | 25384086 | C | 0    | 0      | G |
| 20 | BICF2G630234028         | 25395918 | G | 0    | 0      | A |
| 20 | BICF2G630234035         | 25404531 | A | 0.25 | 0.1429 | G |
| 20 | BICF2G630234089         | 25427899 | A | 0.75 | 0.8571 | G |
| 20 | BICF2G630234115         | 25438157 | A | 0    | 0      | G |
| 20 | BICF2G630234175         | 25453910 | 0 | 0    | 0      | A |
| 20 | BICF2G630234193         | 25467219 | 0 | 0    | 0      | G |
| 20 | BICF2G630234234         | 25490969 | C | 0.25 | 0.2857 | A |
| 20 | BICF2G630234251         | 25495656 | G | 0.25 | 0.2857 | A |
| 20 | BICF2G630234271         | 25507796 | A | 0    | 0      | G |
| 20 | BICF2S23542015          | 25522461 | A | 0    | 0      | G |
| 20 | BICF2S235140            | 25536336 | G | 0    | 0      | A |
| 20 | BICF2G630234287         | 25541548 | A | 0    | 0      | G |
| 20 | BICF2G630234304         | 25555135 | G | 0    | 0      | A |
| 20 | BICF2G630234344         | 25565998 | A | 0.75 | 0.7143 | G |
| 20 | TIGRP2P272781_rs8766730 | 25585968 | A | 0.5  | 0.5714 | G |
| 20 | BICF2P1040570           | 25586113 | A | 0    | 0      | C |
| 20 | BICF2P1359376           | 25588562 | A | 0.5  | 0.5714 | G |
| 20 | BICF2G630234385         | 25605665 | G | 0    | 0      | A |
| 20 | BICF2G630234423         | 25625642 | G | 0.75 | 0.8571 | A |
| 20 | BICF2P1016749           | 25644677 | A | 0.5  | 0.5714 | G |
| 20 | BICF2S23311452          | 25654496 | A | 0.5  | 0.4286 | C |
| 20 | BICF2P1142755           | 25656808 | 0 | 0    | 0      | G |
| 20 | TIGRP2P272823_rs8946870 | 25669450 | C | 0.5  | 0.5714 | A |
| 20 | BICF2P906724            | 25685727 | A | 0    | 0      | G |
| 20 | TIGRP2P272827_rs9153903 | 25691046 | A | 0    | 0      | C |
| 20 | BICF2G630234528         | 25702596 | G | 0.5  | 0.5714 | A |
| 20 | BICF2G630234534         | 25723770 | A | 0.25 | 0.2857 | G |
| 20 | BICF2G630234538         | 25727353 | A | 0.5  | 0.5714 | G |
| 20 | BICF2G630234575         | 25737305 | A | 0.5  | 0.5714 | G |
| 20 | BICF2G630234604         | 25752849 | A | 0.5  | 0.5714 | G |
| 20 | BICF2G630234610         | 25757299 | G | 0.5  | 0.5714 | A |
| 20 | BICF2G630234613         | 25762848 | A | 0.25 | 0.1429 | G |
| 20 | BICF2G630234664         | 25781768 | G | 0.25 | 0.2857 | A |
| 20 | BICF2G630234665         | 25782024 | G | 0.25 | 0.2857 | A |
| 20 | BICF2G630234682         | 25785695 | A | 0.5  | 0.5714 | G |
| 20 | BICF2P1471320           | 25795173 | C | 0    | 0      | A |
| 20 | BICF2P598981            | 25809154 | G | 0.75 | 0.7143 | C |
| 20 | BICF2P1100420           | 25818230 | A | 0.75 | 0.7143 | G |

|    |                         |          |   |      |        |   |
|----|-------------------------|----------|---|------|--------|---|
| 20 | BICF2P1301756           | 25834474 | A | 0    | 0      | C |
| 20 | BICF2P332273            | 25844883 | G | 0    | 0      | A |
| 20 | BICF2P32927             | 25859421 | A | 0    | 0      | G |
| 20 | BICF2S23622950          | 25873402 | 0 | 0    | 0      | G |
| 20 | BICF2P475363            | 25879162 | A | 0    | 0      | G |
| 20 | BICF2P466101            | 25903739 | 0 | 0    | 0      | A |
| 20 | BICF2P1122113           | 25926492 | A | 0.25 | 0.1429 | C |
| 20 | BICF2P1096215           | 25935243 | A | 0.75 | 0.8571 | G |
| 20 | BICF2S2345451           | 25949151 | G | 0    | 0      | A |
| 20 | BICF2P686697            | 25962619 | 0 | 0    | 0      | G |
| 20 | BICF2P124796            | 25971053 | A | 0.75 | 0.7143 | G |
| 20 | BICF2S23641393          | 25994662 | C | 0.75 | 0.7143 | A |
| 20 | TIGRP2P272933_rs9046237 | 26001597 | 0 | 0    | 0      | A |
| 20 | BICF2S23255732          | 26030034 | A | 0.25 | 0.2857 | G |
| 20 | BICF2S23653026          | 26036645 | 0 | 0    | 0      | A |
| 20 | TIGRP2P272938_rs8849252 | 26068851 | G | 0    | 0      | A |
| 20 | BICF2P250347            | 26075176 | G | 0.25 | 0.2857 | C |
| 20 | BICF2P688159            | 26082449 | A | 0    | 0      | G |
| 20 | BICF2P893052            | 26126385 | 0 | 0    | 0      | A |
| 20 | BICF2S22915972          | 26129314 | C | 0    | 0      | G |
| 20 | BICF2P950271            | 26145026 | A | 0    | 0      | G |
| 20 | BICF2S23151083          | 26159406 | A | 0    | 0      | C |
| 20 | BICF2S23610768          | 26171144 | G | 0    | 0      | A |
| 20 | BICF2P613824            | 26175744 | G | 0    | 0      | A |
| 20 | BICF2P1295189           | 26188392 | G | 1    | 1      | A |
| 20 | BICF2P1049462           | 26200701 | A | 0    | 0      | C |
| 20 | BICF2P247680            | 26203720 | T | 0    | 0      | A |
| 20 | BICF2P1315542           | 26215551 | G | 0.25 | 0.2857 | A |
| 20 | TIGRP2P272981_rs8905912 | 26233092 | A | 0.25 | 0.2857 | C |
| 20 | BICF2S23738301          | 26243142 | A | 0.25 | 0.2857 | G |
| 20 | BICF2P616482            | 26261589 | G | 0    | 0      | A |
| 20 | TIGRP2P273004_rs9222596 | 26270008 | G | 0.25 | 0.2857 | A |
| 20 | BICF2S23245160          | 26278805 | A | 0.75 | 0.7143 | G |
| 20 | BICF2S2372284           | 26296441 | G | 0.25 | 0.2857 | A |
| 20 | BICF2S2297291           | 26308533 | A | 0    | 0      | C |
| 20 | BICF2P612540            | 26314118 | A | 0.75 | 0.7143 | G |
| 20 | BICF2P664228            | 26327358 | A | 0    | 0      | C |
| 20 | TIGRP2P273014_rs8848079 | 26341084 | 0 | 0    | 0      | G |
| 20 | BICF2S23250263          | 26363605 | A | 0    | 0      | G |
| 20 | BICF2P580476            | 26372833 | A | 0.75 | 0.7143 | G |
| 20 | BICF2P371928            | 26390858 | A | 0    | 0      | G |
| 20 | BICF2P502678            | 26403842 | G | 1    | 1      | A |
| 20 | TIGRP2P273033_rs9036534 | 26405759 | G | 1    | 1      | A |
| 20 | BICF2P540783            | 26418923 | G | 0.25 | 0.2857 | A |
| 20 | TIGRP2P273040_rs8488576 | 26433146 | A | 0    | 0      | G |
| 20 | TIGRP2P273043_rs8959025 | 26448274 | A | 0    | 0      | C |
| 20 | TIGRP2P273049_rs9002469 | 26457086 | A | 0.75 | 0.7143 | G |

|    |                         |          |   |      |        |   |
|----|-------------------------|----------|---|------|--------|---|
| 20 | BICF2S23650325          | 26474955 | G | 0    | 0      | A |
| 20 | BICF2S232380            | 26487557 | A | 0    | 0      | G |
| 20 | TIGRP2P273067_rs8691722 | 26498634 | G | 0    | 0      | A |
| 20 | TIGRP2P273076_rs9080824 | 26510086 | A | 0    | 0      | G |
| 20 | BICF2S22931700          | 26526647 | G | 0    | 0      | A |
| 20 | BICF2P852733            | 26531045 | C | 0    | 0      | A |
| 20 | TIGRP2P273104_rs9056132 | 26546290 | A | 0.75 | 0.7143 | G |
| 20 | BICF2P1163579           | 26574286 | C | 0.25 | 0.2857 | A |
| 20 | BICF2P1010397           | 26606640 | G | 0    | 0      | A |
| 20 | BICF2P1010398           | 26606689 | A | 0    | 0      | G |
| 20 | BICF2P1143052           | 26615215 | A | 0.25 | 0.2857 | G |
| 20 | BICF2S23435754          | 26615479 | A | 0.25 | 0.2857 | G |
| 20 | BICF2S23519025          | 26637276 | A | 0    | 0      | G |
| 20 | BICF2S23752633          | 26649230 | A | 0.25 | 0.2857 | G |
| 20 | TIGRP2P273120_rs8705607 | 26676868 | A | 0.25 | 0.2857 | G |
| 20 | BICF2P1353278           | 26680721 | C | 0.75 | 0.7143 | A |
| 20 | BICF2P1209421           | 26708254 | 0 | 0    | 0      | A |
| 20 | BICF2P1114249           | 26725616 | A | 0    | 0      | C |
| 20 | BICF2S23352177          | 26727807 | A | 0    | 0      | G |
| 20 | BICF2P756349            | 26741004 | 0 | 0    | 0      | A |
| 20 | BICF2P233319            | 26750363 | C | 0.75 | 0.7143 | A |
| 20 | TIGRP2P273153_rs8927432 | 26761718 | A | 0.75 | 0.7143 | T |
| 20 | BICF2S23235960          | 26792906 | A | 1    | 1      | G |
| 20 | BICF2P1374178           | 26796811 | A | 1    | 1      | G |
| 20 | TIGRP2P273179_rs8599438 | 26810688 | G | 0.75 | 0.7143 | A |
| 20 | BICF2P113039            | 26827948 | G | 0.75 | 0.7143 | A |
| 20 | BICF2P342097            | 26830046 | G | 0.75 | 0.7143 | A |
| 20 | BICF2P1230364           | 26843339 | A | 0    | 0      | G |
| 20 | BICF2P419751            | 26863407 | A | 0.75 | 0.7143 | G |
| 20 | BICF2S23238632          | 26865110 | G | 0.25 | 0.2857 | A |
| 20 | BICF2P670276            | 26878402 | G | 0    | 0      | A |
| 20 | BICF2P226862            | 26905417 | A | 0    | 0      | G |
| 20 | TIGRP2P273234_rs8866107 | 26918937 | G | 0.75 | 0.7143 | A |
| 20 | TIGRP2P273240_rs9008313 | 26929880 | A | 0    | 0      | C |
| 20 | BICF2P1231040           | 26957951 | A | 0    | 0      | G |
| 20 | BICF2P392026            | 26976246 | G | 0    | 0      | A |
| 20 | TIGRP2P273263_rs9092803 | 26979092 | G | 0    | 0      | A |
| 20 | BICF2P1229429           | 26995872 | 0 | 0    | 0      | A |
| 20 | BICF2P1109704           | 27005766 | G | 1    | 1      | A |
| 20 | BICF2P902078            | 27022781 | G | 0    | 0      | A |
| 20 | BICF2P1284566           | 27034669 | G | 0    | 0      | A |
| 20 | TIGRP2P273292_rs9112537 | 27039544 | A | 0    | 0      | C |
| 20 | BICF2P1153069           | 27063555 | 0 | 0    | 0      | G |
| 20 | BICF2S23231473          | 27070527 | A | 0    | 0      | T |
| 20 | BICF2P149501            | 27078448 | A | 0    | 0      | G |
| 20 | BICF2S2327184           | 27082751 | C | 0    | 0      | A |
| 20 | TIGRP2P273296_rs9126404 | 27103519 | G | 0    | 0      | A |

|    |                         |          |   |      |        |   |
|----|-------------------------|----------|---|------|--------|---|
| 20 | BICF2P950051            | 27122915 | A | 0    | 0      | G |
| 20 | BICF2P950046            | 27125504 | A | 0    | 0      | G |
| 20 | BICF2P23777             | 27134870 | 0 | 0    | 0      | A |
| 20 | BICF2P1113585           | 27150838 | G | 0.25 | 0.2857 | A |
| 20 | BICF2P1027956           | 27170722 | A | 0    | 0      | G |
| 20 | BICF2P755029            | 27182187 | A | 0.25 | 0.2857 | G |
| 20 | BICF2P1411289           | 27189448 | 0 | 0    | 0      | C |
| 20 | BICF2P1159250           | 27202532 | G | 0    | 0      | A |
| 20 | BICF2P806340            | 27209876 | A | 0    | 0      | G |
| 20 | BICF2P392785            | 27221001 | G | 0    | 0      | A |
| 20 | TIGRP2P273324_rs9053975 | 27232231 | 0 | 0    | 0      | G |
| 20 | BICF2P451155            | 27246486 | G | 0.75 | 0.7143 | A |
| 20 | BICF2P8631              | 27276651 | A | 0.25 | 0.2143 | G |
| 20 | BICF2S2368606           | 27282443 | G | 0    | 0      | C |
| 20 | BICF2S2347304           | 27286462 | T | 0    | 0      | A |
| 20 | BICF2S23514171          | 27320551 | C | 0    | 0      | G |
| 20 | BICF2S23523273          | 27324124 | 0 | 0    | 0      | G |
| 20 | BICF2P806510            | 27336967 | A | 0    | 0      | C |
| 20 | BICF2P620593            | 27348179 | G | 0.25 | 0.2857 | A |
| 20 | TIGRP2P273363_rs9080310 | 27360052 | A | 0.25 | 0.2857 | G |
| 20 | BICF2S23333510          | 27382414 | G | 0    | 0      | A |
| 20 | BICF2S23753467          | 27396760 | G | 0.25 | 0.2143 | A |
| 20 | BICF2P63658             | 27410077 | G | 0.25 | 0.2857 | A |
| 20 | BICF2P1026884           | 27417720 | G | 0.25 | 0.2857 | A |
| 20 | BICF2P357759            | 27431204 | A | 0.25 | 0.2143 | C |
| 20 | BICF2P1333264           | 27443023 | A | 0.25 | 0.2143 | G |
| 20 | BICF2S23714235          | 27461392 | A | 0    | 0      | C |
| 20 | BICF2P173694            | 27470794 | A | 0    | 0      | G |
| 20 | BICF2P778868            | 27483824 | A | 0.75 | 0.7857 | G |
| 20 | BICF2P691629            | 27494526 | G | 0    | 0      | A |
| 20 | BICF2S23442184          | 27503443 | A | 0.5  | 0.5    | C |
| 20 | BICF2P1361750           | 27527977 | G | 0    | 0      | A |
| 20 | BICF2P210212            | 27532490 | A | 0    | 0      | G |
| 20 | BICF2P414047            | 27543947 | A | 0    | 0      | G |
| 20 | BICF2P1417905           | 27562547 | 0 | 0    | 0      | C |
| 20 | BICF2P59429             | 27567849 | G | 0    | 0      | A |
| 20 | BICF2S2314337           | 27578305 | A | 0    | 0      | G |
| 20 | BICF2P537588            | 27600656 | A | 0    | 0      | G |
| 20 | BICF2P203748            | 27619276 | G | 0.5  | 0.5    | A |
| 20 | BICF2P628294            | 27628292 | A | 0    | 0      | C |
| 20 | TIGRP2P273485_rs9010121 | 27636885 | G | 0.5  | 0.5    | A |
| 20 | TIGRP2P273490_rs8632851 | 27650103 | A | 0    | 0      | G |
| 20 | TIGRP2P273510_rs9074573 | 27657549 | C | 0.5  | 0.5    | A |
| 20 | BICF2P351065            | 27675883 | G | 0.25 | 0.2143 | C |
| 20 | BICF2P1170561           | 27687838 | A | 0    | 0      | G |
| 20 | BICF2P1224072           | 27695956 | A | 0.25 | 0.2143 | C |
| 20 | BICF2P693538            | 27710463 | A | 0    | 0      | G |

|    |                         |          |   |      |        |   |
|----|-------------------------|----------|---|------|--------|---|
| 20 | TIGRP2P273521_rs8950024 | 27710556 | A | 0    | 0      | G |
| 20 | TIGRP2P273525_rs8705404 | 27715862 | G | 0    | 0      | A |
| 20 | BICF2P902384            | 27728051 | G | 0.25 | 0.2143 | A |
| 20 | BICF2S23527273          | 27741503 | A | 0    | 0      | G |
| 20 | BICF2P1047947           | 27742159 | C | 0    | 0      | A |
| 20 | BICF2S23233678          | 27767337 | G | 0    | 0      | A |
| 20 | BICF2S23232842          | 27770752 | A | 0.5  | 0.5    | C |
| 20 | TIGRP2P273551_rs9032752 | 27774615 | A | 0.5  | 0.5    | G |
| 20 | TIGRP2P273560_rs8796805 | 27784173 | 0 | 0    | 0      | G |
| 20 | BICF2P491073            | 27801466 | G | 0    | 0.2143 | A |
| 20 | BICF2S24113814          | 27804991 | G | 0    | 0      | A |
| 20 | TIGRP2P273569_rs8983318 | 27807790 | A | 0    | 0      | C |
| 20 | BICF2S23638622          | 27825452 | G | 0    | 0      | A |
| 20 | BICF2P200762            | 27842278 | A | 0    | 0      | G |
| 20 | BICF2S23660675          | 27858645 | A | 0    | 0      | G |
| 20 | BICF2P1300834           | 27868283 | A | 0.5  | 0.5    | G |
| 20 | BICF2S24414885          | 27876213 | C | 0.5  | 0.5    | A |
| 20 | TIGRP2P273613_rs9154219 | 27898987 | 0 | 0    | 0      | G |
| 20 | BICF2S23219455          | 27920050 | G | 0.5  | 0.5    | A |
| 20 | BICF2S2321465           | 27925147 | A | 0.75 | 0.7857 | G |
| 20 | BICF2P117456            | 27942144 | 0 | 0    | 0      | G |
| 20 | BICF2S22951793          | 27948631 | G | 0.25 | 0.2857 | A |
| 20 | BICF2P528863            | 27958801 | A | 0.25 | 0.2857 | C |
| 20 | BICF2P1469649           | 27972554 | G | 0.5  | 0.5    | C |
| 20 | BICF2P1469654           | 27973173 | A | 0.5  | 0.5    | G |
| 20 | BICF2P804170            | 27979970 | G | 0.25 | 0.2143 | A |
| 20 | BICF2P333950            | 27995849 | A | 0    | 0      | G |
| 20 | BICF2P433229            | 28007838 | C | 0.25 | 0.2143 | G |
| 20 | BICF2P407538            | 28025372 | G | 0.25 | 0.2143 | A |
| 20 | BICF2P1424804           | 28032999 | A | 0.5  | 0.5    | G |
| 20 | TIGRP2P273658_rs9021744 | 28047219 | 0 | 0    | 0      | A |
| 20 | G1095f42S162            | 28052698 | 0 | 0    | 0      | G |
| 20 | G1096f30S97             | 28094197 | 0 | 0    | 0      | C |
| 20 | BICF2P303317            | 28115786 | 0 | 0    | 0      | A |
| 20 | BICF2S23610231          | 28123387 | A | 0    | 0      | G |
| 20 | BICF2P1506644           | 28151034 | 0 | 0    | 0      | A |
| 20 | BICF2P393339            | 28158138 | C | 0.5  | 0.5    | A |
| 20 | BICF2P552896            | 28172542 | C | 0.75 | 0.7143 | A |
| 20 | BICF2S23652891          | 28184164 | G | 0    | 0      | A |
| 20 | BICF2P373169            | 28194315 | A | 0.5  | 0.5    | G |
| 20 | BICF2P909914            | 28204643 | G | 1    | 1      | A |
| 20 | TIGRP2P273676_rs8696164 | 28216318 | G | 0    | 0      | A |
| 20 | BICF2P361175            | 28227457 | A | 0    | 0      | G |
| 20 | BICF2S23125629          | 28242179 | G | 0.75 | 0.7857 | A |
| 20 | TIGRP2P273683_rs8897705 | 28257988 | A | 0    | 0      | C |
| 20 | BICF2P1280857           | 28271341 | A | 0.25 | 0.2143 | G |
| 20 | BICF2S23656370          | 28288333 | G | 0.5  | 0.5    | A |

|    |                         |          |   |      |        |   |
|----|-------------------------|----------|---|------|--------|---|
| 20 | BICF2P712957            | 28311823 | A | 0.25 | 0.25   | G |
| 20 | BICF2P743619            | 28322081 | A | 0.25 | 0.2143 | G |
| 20 | TIGRP2P273693_rs9119211 | 28327448 | A | 0    | 0      | C |
| 20 | BICF2P373245            | 28338061 | C | 0.5  | 0.5    | A |
| 20 | BICF2P980561            | 28353129 | C | 0.5  | 0.5    | A |
| 20 | TIGRP2P273707_rs9191976 | 28371774 | A | 0.5  | 0.5    | C |
| 20 | BICF2P365394            | 28389806 | A | 0.5  | 0.5    | G |
| 20 | BICF2P365393            | 28389960 | C | 0.5  | 0.5    | A |
| 20 | BICF2S23646014          | 28404266 | 0 | 0    | 0      | G |
| 20 | TIGRP2P273722_rs8797816 | 28412698 | G | 0    | 0      | A |
| 20 | BICF2S23554483          | 28417152 | A | 0    | 0      | G |
| 20 | TIGRP2P273730_rs8971269 | 28438793 | A | 0    | 0      | G |
| 20 | BICF2P1100253           | 28449342 | A | 0.5  | 0.5    | T |
| 20 | BICF2P1072667           | 28451736 | A | 0.5  | 0.5    | G |
| 20 | BICF2P173460            | 28465749 | A | 0.5  | 0.5    | C |
| 20 | BICF2P423636            | 28476161 | G | 0.5  | 0.5    | A |
| 20 | BICF2P523104            | 28494494 | G | 0.5  | 0.5    | A |
| 20 | BICF2P830189            | 28503487 | C | 0.25 | 0.2143 | G |
| 20 | TIGRP2P273737_rs9157161 | 28512732 | G | 0.25 | 0.2857 | A |
| 20 | BICF2P485140            | 28525002 | A | 0.25 | 0.2143 | G |
| 20 | BICF2P97727             | 28537377 | A | 0    | 0      | C |
| 20 | BICF2P746755            | 28549617 | C | 0    | 0      | A |
| 20 | TIGRP2P273748_rs8797902 | 28556949 | 0 | 0    | 0      | G |
| 20 | BICF2P1122134           | 28568438 | 0 | 0    | 0      | G |
| 20 | TIGRP2P273768_rs8576640 | 28577823 | A | 0.25 | 0.2143 | C |
| 20 | BICF2P768103            | 28595379 | C | 0.25 | 0.2143 | A |
| 20 | BICF2P682380            | 28621947 | A | 0.75 | 0.7143 | G |
| 20 | BICF2P1090967           | 28632139 | A | 0    | 0      | G |
| 20 | BICF2P1362521           | 28638809 | G | 0.25 | 0.2143 | A |
| 20 | BICF2S23519645          | 28646690 | G | 0.75 | 0.7143 | A |
| 20 | BICF2S23314856          | 28678195 | A | 0.75 | 0.7143 | G |
| 20 | BICF2P507637            | 28684765 | A | 0.25 | 0.2143 | G |
| 20 | TIGRP2P273802_rs8936042 | 28699624 | A | 0    | 0      | G |
| 20 | BICF2P721041            | 28700818 | A | 0    | 0      | G |
| 20 | TIGRP2P273809_rs8794345 | 28725213 | G | 0    | 0      | A |
| 20 | BICF2P1174341           | 28728193 | A | 0    | 0      | G |
| 20 | BICF2S22914910          | 28758328 | G | 0    | 0      | A |
| 20 | BICF2P1037912           | 28765878 | A | 0.75 | 0.7143 | C |
| 20 | BICF2P729609            | 28779091 | A | 0.25 | 0.2143 | G |
| 20 | TIGRP2P273842_rs8972297 | 28789048 | G | 0.5  | 0.5    | A |
| 20 | TIGRP2P273858_rs8690488 | 28797843 | G | 0    | 0      | A |
| 20 | BICF2P738822            | 28812038 | 0 | 0    | 0      | A |
| 20 | BICF2S23133673          | 28836068 | A | 0.75 | 0.7857 | G |
| 20 | BICF2P1131783           | 28850949 | G | 0    | 0      | A |
| 20 | BICF2S2294852           | 28854892 | G | 0    | 0      | A |
| 20 | BICF2P925715            | 28871311 | G | 0    | 0      | A |
| 20 | BICF2P1252720           | 28880179 | A | 0    | 0      | G |

|    |                         |          |   |      |        |   |
|----|-------------------------|----------|---|------|--------|---|
| 20 | TIGRP2P273891_rs8532186 | 28892761 | G | 0.25 | 0.2143 | A |
| 20 | BICF2S23311125          | 28899955 | 0 | 0    | 0      | A |
| 20 | BICF2P510624            | 28915461 | G | 0.25 | 0.2143 | A |
| 20 | BICF2P725997            | 28925032 | A | 0.75 | 0.7857 | G |
| 20 | BICF2S23351534          | 28957003 | A | 0.25 | 0.2143 | G |
| 20 | TIGRP2P273907_rs8953996 | 28970200 | A | 0.5  | 0.5    | G |
| 20 | BICF2S2297886           | 28985560 | A | 0    | 0      | G |
| 20 | TIGRP2P273909_rs9156238 | 28994845 | G | 1    | 1      | A |
| 20 | BICF2P65163             | 29010216 | G | 0.25 | 0.2857 | A |
| 20 | BICF2P56463             | 29017213 | A | 0.25 | 0.2857 | G |
| 20 | BICF2S23554895          | 29039520 | G | 0.25 | 0.2857 | A |
| 20 | BICF2S23228253          | 29046026 | G | 0    | 0      | A |
| 20 | BICF2S2315876           | 29099034 | T | 0    | 0      | A |
| 20 | BICF2P479841            | 29111958 | 0 | 0    | 0      | A |
| 20 | BICF2P268423            | 29120555 | A | 0    | 0      | C |
| 20 | TIGRP2P273950_rs8708353 | 29132629 | A | 0.75 | 0.7143 | T |
| 20 | BICF2P1238422           | 29152007 | C | 0.75 | 0.7143 | A |
| 20 | BICF2S2299394           | 29160902 | A | 0    | 0      | G |
| 20 | BICF2P498446            | 29172125 | G | 0.75 | 0.7143 | A |
| 20 | BICF2P422564            | 29176426 | A | 0    | 0      | G |
| 20 | BICF2P1396146           | 29193749 | 0 | 0    | 0      | A |
| 20 | BICF2S23728107          | 29200807 | A | 0.5  | 0.3571 | G |
| 20 | TIGRP2P273974_rs8889639 | 29211861 | A | 0    | 0      | G |
| 20 | BICF2S2343489           | 29244943 | G | 0.25 | 0.2857 | A |
| 20 | BICF2P1086433           | 29261215 | G | 0    | 0      | A |
| 20 | BICF2P1454668           | 29284517 | A | 0.5  | 0.3571 | G |
| 20 | BICF2S2343752           | 29300964 | A | 0    | 0      | G |
| 20 | BICF2P1042399           | 29302634 | G | 0.75 | 0.7143 | A |
| 20 | TIGRP2P273993_rs8523729 | 29316362 | A | 0    | 0      | G |
| 20 | BICF2P1079412           | 29327777 | G | 0    | 0      | A |
| 20 | BICF2P757569            | 29337086 | A | 0.25 | 0.2857 | G |
| 20 | BICF2P553279            | 29343606 | G | 0.75 | 0.7143 | A |
| 20 | BICF2P570998            | 29354653 | 0 | 0    | 0      | G |
| 20 | BICF2P1205512           | 29360360 | G | 0.25 | 0.2857 | A |
| 20 | BICF2S2315741           | 29392601 | A | 0.25 | 0.2857 | C |
| 20 | G1097f44S163            | 29420870 | G | 0.25 | 0.2857 | A |
| 20 | BICF2P1276018           | 29452028 | 0 | 0    | 0      | A |
| 20 | BICF2P1413653           | 29489095 | G | 0    | 0      | A |
| 20 | TIGRP2P274014_rs9048736 | 29504363 | 0 | 0    | 0      | A |
| 20 | BICF2P1001812           | 29513667 | A | 0.75 | 0.7143 | G |
| 20 | BICF2P358410            | 29541677 | A | 0.75 | 0.7143 | C |
| 20 | BICF2S23718000          | 29549334 | A | 0.75 | 0.7143 | G |
| 20 | BICF2S23757173          | 29557924 | A | 1    | 0.7143 | G |
| 20 | BICF2P840059            | 29577217 | G | 0    | 0      | C |
| 20 | BICF2P681273            | 29589785 | G | 0.25 | 0.2857 | A |
| 20 | BICF2P1294671           | 29603550 | C | 0.25 | 0.2857 | A |
| 20 | BICF2S23242679          | 29616833 | G | 0.5  | 0.5714 | A |

|    |                |          |   |      |        |   |
|----|----------------|----------|---|------|--------|---|
| 20 | BICF2P676689   | 29626073 | 0 | 0    | 0      | G |
| 20 | BICF2S23427244 | 29644658 | G | 0.75 | 0.7143 | A |
| 20 | BICF2S23131491 | 29647882 | A | 0.75 | 0.7143 | C |
| 20 | BICF2S2341953  | 29660735 | A | 0.25 | 0.2857 | G |
| 20 | BICF2P395049   | 29677297 | A | 0    | 0      | G |
| 20 | BICF2S23150790 | 29685859 | A | 0    | 0      | G |
| 20 | BICF2S24111147 | 29694230 | G | 0    | 0      | A |
| 20 | BICF2P254198   | 29709569 | G | 0.5  | 0.5714 | A |
| 20 | BICF2S2327668  | 29723900 | 0 | 0    | 0      | G |
| 20 | BICF2P1351441  | 29727644 | G | 0    | 0      | A |
| 20 | BICF2P875282   | 29741663 | A | 0.5  | 0.5714 | C |
| 20 | BICF2P1027625  | 29762241 | 0 | 0    | 0      | A |
| 20 | BICF2P325428   | 29777396 | A | 0.25 | 0.1429 | G |
| 20 | BICF2P722666   | 29781754 | C | 0.5  | 0.5714 | A |
| 20 | BICF2P267808   | 29786514 | A | 0.5  | 0.4167 | G |
| 20 | BICF2P420117   | 29788562 | A | 0.25 | 0.2857 | G |
| 20 | BICF2P374011   | 29807784 | C | 1    | 1      | A |
| 20 | BICF2P759830   | 29812203 | A | 0.75 | 0.8571 | C |
| 20 | BICF2S23024696 | 29821222 | A | 0.25 | 0.1429 | G |
| 20 | BICF2P947234   | 29836117 | A | 0.5  | 0.5714 | G |
| 20 | BICF2P590466   | 29853107 | C | 0.5  | 0.4286 | A |
| 20 | BICF2S237988   | 29853250 | C | 0    | 0      | A |
| 20 | BICF2P264179   | 29855910 | G | 0.5  | 0.4286 | A |
| 20 | BICF2S23436366 | 29871785 | A | 0.25 | 0.3571 | G |
| 20 | BICF2S2448794  | 29879159 | G | 0.5  | 0.5714 | A |
| 20 | BICF2P231166   | 29898002 | C | 0.75 | 0.8571 | A |
| 20 | BICF2P841063   | 29900517 | A | 0    | 0      | G |
| 20 | BICF2S2301452  | 29919331 | A | 0.25 | 0.1429 | G |
| 20 | BICF2P755558   | 29932926 | 0 | 0    | 0      | A |
| 20 | BICF2S23061170 | 29937355 | C | 0.25 | 0.1429 | G |
| 20 | BICF2S23711918 | 29947729 | A | 0.25 | 0.2857 | G |
| 20 | BICF2P528264   | 29957670 | G | 0    | 0      | A |
| 20 | BICF2P656077   | 29972621 | 0 | 0    | 0      | A |
| 20 | BICF2P1106433  | 29982961 | G | 0.5  | 0.4286 | A |
| 20 | BICF2S23356271 | 29998834 | A | 0.5  | 0.5714 | G |
| 20 | BICF2P634022   | 30003765 | G | 0    | 0      | A |
| 20 | BICF2P102867   | 30018550 | G | 0.5  | 0.4286 | A |
| 20 | BICF2P155171   | 30026893 | A | 0.25 | 0.1429 | G |
| 20 | BICF2P954610   | 30039696 | C | 0.5  | 0.5714 | A |
| 20 | BICF2P333653   | 30059902 | G | 0.25 | 0.2857 | A |
| 20 | BICF2P218923   | 30068425 | A | 0    | 0      | G |
| 20 | BICF2P1002142  | 30083054 | A | 0.5  | 0.5714 | G |
| 20 | BICF2P828997   | 30086184 | G | 0.5  | 0.5    | A |
| 20 | BICF2S23155920 | 30095437 | G | 0.25 | 0.2857 | A |
| 20 | BICF2S2327861  | 30096222 | G | 0.25 | 0.25   | A |
| 20 | BICF2P790244   | 30099736 | A | 0.25 | 0.2857 | G |
| 20 | BICF2P1393141  | 30108371 | C | 0.25 | 0.25   | A |



|    |                         |          |   |      |        |   |
|----|-------------------------|----------|---|------|--------|---|
| 20 | BICF2P1272769           | 30117028 | G | 1    | 1      | A |
| 20 | BICF2P813758            | 30126633 | G | 0.25 | 0.2857 | A |
| 20 | BICF2P1345879           | 30132329 | A | 0.25 | 0.2857 | G |
| 20 | BICF2P682151            | 30146608 | A | 0.25 | 0.2857 | T |
| 20 | BICF2S23738486          | 30155289 | C | 0    | 0      | A |
| 20 | BICF2P572457            | 30166526 | C | 0    | 0      | A |
| 20 | BICF2S23635700          | 30182824 | G | 0    | 0      | A |
| 20 | BICF2P178583            | 30190042 | G | 0.5  | 0.5    | A |
| 20 | BICF2S239644            | 30215068 | A | 0.5  | 0.5    | G |
| 20 | BICF2S2366929           | 30235693 | 0 | 0    | 0      | A |
| 20 | BICF2P858796            | 30245214 | 0 | 0    | 0      | A |
| 20 | BICF2S22946149          | 30261490 | A | 0    | 0      | G |
| 20 | TIGRP2P274026_rs8627242 | 30272298 | 0 | 0    | 0      | A |
| 20 | BICF2S2308692           | 30297354 | G | 0    | 0      | C |
| 20 | BICF2P320528            | 30314445 | A | 0.25 | 0.2857 | T |
| 20 | BICF2S2298391           | 30330432 | G | 0.5  | 0.5    | A |
| 20 | BICF2S23636223          | 30339984 | G | 0    | 0      | C |
| 20 | BICF2P737127            | 30351105 | 0 | 0    | 0      | G |
| 20 | TIGRP2P274027_rs8630682 | 30361335 | 0 | 0    | 0      | G |
| 20 | BICF2S2449053           | 30376835 | T | 0    | 0      | A |
| 20 | BICF2S22949435          | 30394358 | G | 0    | 0      | A |
| 20 | BICF2P480329            | 30408279 | A | 0.25 | 0.2857 | G |
| 20 | TIGRP2P274029_rs8727490 | 30425868 | 0 | 0    | 0      | A |
| 20 | BICF2S23141829          | 30433155 | A | 0.25 | 0.2857 | G |
| 20 | BICF2P1186765           | 30448049 | A | 0.25 | 0.2143 | G |
| 20 | BICF2P498292            | 30453445 | 0 | 0    | 0      | A |
| 20 | BICF2P331155            | 30471570 | G | 0.25 | 0.2143 | A |
| 20 | BICF2P372254            | 30480462 | A | 0.25 | 0.2143 | G |
| 20 | BICF2S23230812          | 30496776 | A | 0.25 | 0.2857 | G |
| 20 | BICF2P914646            | 30503039 | G | 0.75 | 0.7143 | A |
| 20 | BICF2S23320844          | 30510008 | G | 0.25 | 0.2    | C |
| 20 | BICF2P183395            | 30521255 | G | 0.25 | 0.2857 | A |
| 20 | BICF2S23436508          | 30522574 | C | 0.25 | 0.2857 | A |
| 20 | BICF2P866287            | 30535318 | 0 | 0    | 0      | G |
| 20 | BICF2P791062            | 30587148 | 0 | 0    | 0      | A |
| 20 | BICF2S2308135           | 30634582 | G | 0.25 | 0.2143 | A |
| 20 | BICF2S2307693           | 30638336 | G | 0.25 | 0.2143 | A |
| 20 | BICF2S2363833           | 30654832 | A | 0    | 0      | G |
| 20 | BICF2P469603            | 30704252 | A | 0.75 | 0.7143 | C |
| 20 | BICF2P648782            | 30712153 | A | 0.75 | 0.7143 | T |
| 20 | BICF2P558983            | 30722002 | A | 0.5  | 0.5    | G |
| 20 | BICF2S23119475          | 30734577 | A | 0    | 0      | G |
| 20 | BICF2P484920            | 30742393 | A | 0.25 | 0.2143 | G |
| 20 | BICF2P5072              | 30771636 | 0 | 0    | 0      | C |
| 20 | BICF2P904813            | 30799926 | A | 0    | 0      | G |
| 20 | BICF2P1245158           | 30809122 | A | 0.25 | 0.2143 | G |
| 20 | BICF2P915056            | 30823222 | 0 | 0    | 0      | A |

|    |                         |          |   |      |        |   |
|----|-------------------------|----------|---|------|--------|---|
| 20 | BICF2P1418135           | 30849325 | C | 0.5  | 0.5    | A |
| 20 | BICF2P350975            | 30856711 | G | 0.75 | 0.7857 | A |
| 20 | BICF2P1117186           | 30888915 | 0 | 0    | 0      | G |
| 20 | BICF2S23320202          | 30905799 | G | 0.5  | 0.5    | A |
| 20 | BICF2S23410559          | 30918758 | G | 0.25 | 0.2857 | A |
| 20 | BICF2P581380            | 30940950 | G | 0.25 | 0.2857 | A |
| 20 | BICF2P571837            | 30947015 | G | 0.75 | 0.7143 | A |
| 20 | BICF2P407431            | 30960749 | G | 1    | 1      | A |
| 20 | BICF2P1441431           | 30972816 | G | 0.25 | 0.2857 | A |
| 20 | BICF2P1039479           | 30983509 | A | 0    | 0      | C |
| 20 | TIGRP2P274037_rs8554161 | 30998942 | 0 | 0    | 0      | C |
| 20 | BICF2P1069312           | 31020606 | A | 0.75 | 0.7857 | G |
| 20 | BICF2S22930806          | 31030252 | G | 0.25 | 0.2857 | A |
| 20 | BICF2P1087227           | 31042460 | C | 0.25 | 0.2143 | A |
| 20 | BICF2S24412380          | 31053568 | G | 0    | 0      | A |
| 20 | BICF2P8015              | 31072964 | 0 | 0    | 0      | A |
| 20 | BICF2S23112664          | 31079673 | A | 0.5  | 0.5    | G |
| 20 | BICF2S23732712          | 31103586 | G | 0.25 | 0.2143 | A |
| 20 | BICF2P1000184           | 31108447 | A | 0    | 0      | G |
| 20 | BICF2P746890            | 31121873 | T | 0.25 | 0.2857 | A |
| 20 | BICF2P872387            | 31138555 | A | 0.25 | 0.2143 | G |
| 20 | BICF2P1431737           | 31150480 | A | 0.25 | 0.2143 | G |
| 20 | BICF2P1361112           | 31155497 | G | 0.25 | 0.2857 | A |
| 20 | BICF2P584291            | 31174085 | C | 0.75 | 0.5714 | A |
| 20 | BICF2S229993            | 31177903 | G | 0.25 | 0.2143 | A |
| 20 | BICF2S23453275          | 31195631 | A | 1    | 1      | G |
| 20 | BICF2P744811            | 31224886 | A | 0    | 0      | T |
| 20 | BICF2S23151039          | 31238029 | A | 0.5  | 0.5    | G |
| 20 | BICF2P414902            | 31249372 | 0 | 0    | 0      | A |
| 20 | BICF2P1151320           | 31257216 | 0 | 0    | 0      | G |
| 20 | BICF2S23120038          | 31280966 | A | 0.75 | 0.7857 | C |
| 20 | BICF2S23417443          | 31300205 | A | 0.75 | 0.7857 | G |
| 20 | BICF2P1349924           | 31323973 | A | 0    | 0      | G |
| 20 | BICF2S23343136          | 31329774 | A | 0.75 | 0.7143 | G |
| 20 | BICF2P924488            | 31343623 | 0 | 0    | 0      | G |
| 20 | BICF2P825199            | 31358110 | A | 0.5  | 0.5    | G |
| 20 | BICF2P899345            | 31361776 | A | 0.5  | 0.5    | G |
| 20 | BICF2P124173            | 31376422 | A | 0.25 | 0.2857 | G |
| 20 | BICF2S23641023          | 31404097 | G | 0.25 | 0.2857 | A |
| 20 | BICF2S23247432          | 31417470 | A | 0.25 | 0.2857 | G |
| 20 | BICF2S23621502          | 31420469 | G | 0.5  | 0.5    | A |
| 20 | BICF2P153597            | 31432450 | 0 | 0    | 0      | A |
| 20 | BICF2P1011055           | 31445328 | A | 0.5  | 0.5    | G |
| 20 | BICF2S22963849          | 31457732 | A | 0.75 | 0.7143 | G |
| 20 | BICF2P917122            | 31461628 | A | 0.25 | 0.2143 | G |
| 20 | BICF2S2445073           | 31465790 | G | 0.5  | 0.5    | A |
| 20 | BICF2P1386240           | 31471067 | G | 1    | 1      | A |

|    |                |          |   |      |        |   |
|----|----------------|----------|---|------|--------|---|
| 20 | BICF2P846231   | 31482825 | A | 0    | 0      | G |
| 20 | BICF2P226091   | 31492984 | C | 0.75 | 0.7143 | A |
| 20 | BICF2P1208707  | 31498562 | A | 0    | 0      | G |
| 20 | BICF2P1452229  | 31514271 | A | 0.25 | 0.1667 | G |
| 20 | BICF2S23118322 | 31528893 | A | 0.25 | 0.2143 | G |
| 20 | BICF2P1136005  | 31533002 | A | 0.25 | 0.2143 | G |
| 20 | BICF2P672603   | 31540668 | G | 0.25 | 0.2143 | A |
| 20 | BICF2P651824   | 31548357 | 0 | 0    | 0      | A |
| 20 | BICF2P250099   | 31560174 | G | 0.25 | 0.2857 | A |
| 20 | BICF2P765627   | 31568176 | 0 | 0    | 0      | C |
| 20 | BICF2S23031582 | 31587456 | G | 0    | 0      | C |
| 20 | BICF2S23328615 | 31593157 | G | 0.5  | 0.5    | A |
| 20 | BICF2S23354419 | 31608610 | A | 0.5  | 0.5    | G |
| 20 | BICF2P576682   | 31618089 | G | 0    | 0      | A |
| 20 | BICF2P411895   | 31633197 | C | 0    | 0      | G |
| 20 | BICF2S23011473 | 31652909 | A | 0    | 0      | G |
| 20 | BICF2S23024143 | 31672722 | G | 0    | 0      | A |
| 20 | BICF2P516031   | 31683523 | A | 0.25 | 0.2143 | G |
| 20 | BICF2P272990   | 31696627 | A | 0    | 0      | G |
| 20 | BICF2P1249484  | 31711880 | A | 0    | 0      | G |
| 20 | BICF2P591098   | 31717974 | G | 0    | 0      | A |
| 20 | BICF2S23136830 | 31757065 | A | 0    | 0      | G |
| 20 | BICF2S23656476 | 31767434 | G | 0    | 0      | A |
| 20 | BICF2S23747541 | 31796791 | A | 0    | 0      | T |
| 20 | BICF2S23014762 | 31799208 | A | 0    | 0      | G |
| 20 | BICF2P285998   | 31817072 | 0 | 0    | 0      | C |
| 20 | BICF2P473496   | 31821358 | C | 0    | 0      | A |
| 20 | BICF2P1316449  | 31839605 | A | 0    | 0      | C |
| 20 | BICF2P580416   | 31844266 | A | 0.75 | 0.7857 | C |
| 20 | BICF2P642325   | 31851278 | G | 0.25 | 0.2143 | A |
| 20 | BICF2S23123519 | 31856031 | A | 0.75 | 0.7857 | G |
| 20 | BICF2S23217200 | 31875137 | C | 0.5  | 0.5714 | A |
| 20 | BICF2P1360309  | 31878966 | C | 0    | 0      | A |
| 20 | BICF2P451221   | 31892022 | A | 0    | 0      | G |
| 20 | BICF2P837085   | 31913386 | A | 0.5  | 0.5714 | G |
| 20 | BICF2P1073205  | 31927458 | 0 | 0    | 0      | A |
| 20 | BICF2P195283   | 31943028 | C | 0    | 0      | A |
| 20 | BICF2P195282   | 31943177 | G | 0    | 0      | A |
| 20 | BICF2P877085   | 31954793 | G | 0    | 0      | A |
| 20 | BICF2P300850   | 31967500 | A | 1    | 1      | G |
| 20 | BICF2S23751362 | 31980527 | A | 1    | 1      | C |
| 20 | BICF2P1072636  | 31982739 | T | 1    | 1      | A |
| 20 | BICF2S2371274  | 32001021 | A | 0    | 0      | G |
| 20 | BICF2P1366573  | 32006650 | G | 0.5  | 0.5714 | A |
| 20 | BICF2S23521349 | 32027421 | A | 0.75 | 0.7857 | G |
| 20 | BICF2S23415155 | 32058144 | A | 0.25 | 0.2143 | T |
| 20 | BICF2S2397467  | 32071724 | 0 | 0    | 0      | A |

|    |                         |          |   |      |        |   |
|----|-------------------------|----------|---|------|--------|---|
| 20 | BICF2S24116690          | 32081720 | G | 0.25 | 0.1667 | A |
| 20 | BICF2P595868            | 32089221 | G | 0.5  | 0.5714 | A |
| 20 | BICF2S23531791          | 32113792 | 0 | 0    | 0      | C |
| 20 | BICF2S23335312          | 32136774 | G | 0.25 | 0.2143 | A |
| 20 | BICF2S23244664          | 32143494 | A | 0.25 | 0.2143 | G |
| 20 | BICF2S22954169          | 32163901 | G | 0.75 | 0.7857 | A |
| 20 | BICF2P838398            | 32166197 | A | 0    | 0      | G |
| 20 | BICF2S23914190          | 32188761 | A | 0.5  | 0.7857 | G |
| 20 | BICF2S2297949           | 32202618 | G | 0.75 | 0.7857 | A |
| 20 | BICF2S2332575           | 32226412 | A | 0.75 | 0.7857 | G |
| 20 | BICF2P445074            | 32241169 | A | NA   | NA     | G |
| 20 | BICF2S23737828          | 32251006 | A | 0    | 0      | G |
| 20 | BICF2P712903            | 32270810 | 0 | 0    | 0      | G |
| 20 | BICF2P454193            | 32294105 | A | 0    | 0      | G |
| 20 | BICF2P927589            | 32312847 | A | 0    | 0      | G |
| 20 | BICF2P239408            | 32319647 | A | 0    | 0      | G |
| 20 | BICF2P318528            | 32327012 | A | 0    | 0      | G |
| 20 | BICF2P1091780           | 32338543 | C | 0    | 0      | G |
| 20 | BICF2P1218073           | 32351557 | A | 0    | 0      | G |
| 20 | BICF2P931813            | 32371339 | A | 0    | 0      | G |
| 20 | BICF2S2338135           | 32375963 | A | 0.75 | 0.7143 | G |
| 20 | BICF2P347742            | 32380802 | C | 0.25 | 0.2857 | A |
| 20 | BICF2P598766            | 32392676 | G | 0.25 | 0.2143 | A |
| 20 | BICF2P890643            | 32399199 | G | 0.25 | 0.2143 | A |
| 20 | BICF2P1203073           | 32416150 | A | 0.75 | 0.8333 | G |
| 20 | BICF2G630448515         | 32430387 | 0 | 0    | 0      | G |
| 20 | BICF2P1106567           | 32439684 | A | 0.75 | 0.7857 | G |
| 20 | BICF2S23416546          | 32443478 | C | 0.75 | 0.7857 | A |
| 20 | BICF2P1053369           | 32456654 | C | 0.75 | 0.7857 | A |
| 20 | BICF2P1054218           | 32465307 | A | 0.5  | 0.5714 | G |
| 20 | TIGRP2P274066_rs8580593 | 32477734 | 0 | 0    | 0      | C |
| 20 | BICF2P394581            | 32496588 | G | 0.25 | 0.2143 | A |
| 20 | BICF2P1135467           | 32529355 | G | 0.5  | 0.5    | A |
| 20 | BICF2P1056766           | 32538318 | 0 | 0    | 0      | G |
| 20 | BICF2P722693            | 32548421 | A | 0.5  | 0.5    | G |
| 20 | BICF2P979856            | 32560710 | G | 0.25 | 0.2143 | A |
| 20 | BICF2S23050791          | 32577401 | A | 0    | 0.2857 | G |
| 20 | BICF2P263736            | 32582921 | A | 0.25 | 0.2857 | G |
| 20 | BICF2P622590            | 32610480 | C | 0.75 | 0.7857 | G |
| 20 | BICF2P1004210           | 32621551 | G | 0.75 | 0.7143 | A |
| 20 | BICF2P219030            | 32633409 | A | 0    | 0      | G |
| 20 | BICF2S23124315          | 32642248 | A | 0.75 | 0.7143 | G |
| 20 | BICF2P1456121           | 32649256 | A | 0    | 0      | G |
| 20 | BICF2P343078            | 32660418 | G | 0.25 | 0.2857 | C |
| 20 | BICF2P1019405           | 32674982 | G | 0    | 0      | A |
| 20 | BICF2P739796            | 32688709 | A | 0.25 | 0.2857 | C |
| 20 | BICF2P744719            | 32695146 | C | 0    | 0      | A |

|    |                         |          |   |      |        |   |
|----|-------------------------|----------|---|------|--------|---|
| 20 | BICF2P269111            | 32712766 | G | 0.25 | 0.2857 | A |
| 20 | BICF2S23060706          | 32720935 | G | 0    | 0      | A |
| 20 | BICF2P1064706           | 32733908 | 0 | 0    | 0      | G |
| 20 | BICF2P96438             | 32740680 | A | 0.25 | 0.2143 | C |
| 20 | BICF2P462156            | 32754282 | G | 0    | 0      | A |
| 20 | BICF2P1178192           | 32763960 | A | 0    | 0      | T |
| 20 | BICF2P887826            | 32775410 | G | 0.25 | 0.2143 | A |
| 20 | BICF2P84517             | 32787070 | G | 0.25 | 0.2143 | A |
| 20 | BICF2S2376782           | 32799545 | A | 0.25 | 0.2857 | G |
| 20 | BICF2S23730457          | 32819981 | A | 0.25 | 0.2857 | G |
| 20 | BICF2P192074            | 32836569 | 0 | 0    | 0      | G |
| 20 | BICF2P747693            | 32851188 | A | 0.5  | 0.5714 | G |
| 20 | BICF2P1100754           | 32856269 | G | 0    | 0      | A |
| 20 | BICF2P630464            | 32877568 | A | 0    | 0      | G |
| 20 | BICF2P694740            | 32879554 | A | 0.5  | 0.5714 | G |
| 20 | BICF2P307857            | 32909312 | 0 | 0    | 0      | G |
| 20 | BICF2P90285             | 32917510 | G | 0    | 0      | A |
| 20 | BICF2P861467            | 32929853 | 0 | 0    | 0      | A |
| 20 | BICF2P596312            | 32945962 | 0 | 0    | 0      | A |
| 20 | BICF2P916054            | 32958338 | C | 0.25 | 0.2143 | A |
| 20 | BICF2P102924            | 32969823 | 0 | 0    | 0      | A |
| 20 | BICF2P98439             | 32991964 | A | 0    | 0      | G |
| 20 | BICF2S23229896          | 32996141 | G | 0    | 0      | A |
| 20 | BICF2P972428            | 33009321 | A | 0    | 0      | G |
| 20 | BICF2S22923928          | 33030313 | A | 0.25 | 0.2857 | G |
| 20 | BICF2P1436745           | 33042586 | G | 0.5  | 0.5    | A |
| 20 | BICF2S2398518           | 33052441 | A | 0    | 0      | G |
| 20 | BICF2S23429612          | 33096830 | G | 0.75 | 0.7857 | A |
| 20 | BICF2P56389             | 33107756 | A | 0.25 | 0.125  | G |
| 20 | BICF2S23118366          | 33110133 | 0 | 0    | 0      | A |
| 20 | BICF2P656026            | 33126356 | T | 0.25 | 0.2143 | A |
| 20 | BICF2P501508            | 33132630 | G | 0.25 | 0.2143 | A |
| 20 | BICF2P1221008           | 33144515 | G | 0.25 | 0.2143 | A |
| 20 | TIGRP2P274081_rs8400166 | 33157611 | 0 | 0    | 0      | A |
| 20 | BICF2P1051652           | 33177792 | A | 0.5  | 0.5    | C |
| 20 | BICF2P532759            | 33194871 | 0 | 0    | 0      | G |
| 20 | BICF2P923905            | 33203040 | A | 0    | 0      | G |
| 20 | BICF2P497208            | 33239902 | C | 0.5  | 0.5    | A |
| 20 | BICF2P214687            | 33246901 | A | 0.5  | 0.5    | G |
| 20 | BICF2P704051            | 33265213 | A | 0    | 0      | C |
| 20 | BICF2P600526            | 33277273 | A | 0.25 | 0.2857 | G |
| 20 | BICF2P760908            | 33284624 | A | 0.25 | 0.2857 | G |
| 20 | TIGRP2P274085_rs8836262 | 33301659 | 0 | 0    | 0      | C |
| 20 | BICF2P656600            | 33322712 | A | 0.25 | 0.2857 | G |
| 20 | BICF2P582762            | 33329271 | 0 | 0    | 0      | A |
| 20 | BICF2P279556            | 33343828 | A | 0    | 0      | G |
| 20 | BICF2S2331706           | 33383671 | G | 0.75 | 0.7143 | A |

|    |                         |          |   |      |        |   |
|----|-------------------------|----------|---|------|--------|---|
| 20 | BICF2P782839            | 33401979 | A | 0    | 0      | G |
| 20 | BICF2P124240            | 33423086 | 0 | 0    | 0      | G |
| 20 | BICF2S23347265          | 33431478 | A | 0.25 | 0.2143 | G |
| 20 | BICF2P26382             | 33447844 | G | 0.25 | 0.2143 | A |
| 20 | BICF2P427727            | 33464395 | 0 | 0    | 0      | G |
| 20 | BICF2P305117            | 33486951 | C | 0.25 | 0.2857 | A |
| 20 | BICF2P540426            | 33494483 | C | 0    | 0      | A |
| 20 | BICF2P776510            | 33506757 | G | 0    | 0      | A |
| 20 | BICF2P1422311           | 33522604 | A | 0    | 0      | G |
| 20 | BICF2P213740            | 33537801 | A | 0.25 | 0.25   | G |
| 20 | BICF2P972602            | 33547773 | G | 0.5  | 0.5714 | A |
| 20 | BICF2P447124            | 33568430 | A | 0.25 | 0.2857 | C |
| 20 | BICF2P417949            | 33569764 | A | 0.25 | 0.2857 | C |
| 20 | BICF2P993159            | 33602646 | G | 0.25 | 0.2857 | A |
| 20 | BICF2P730654            | 33611905 | A | 0    | 0      | G |
| 20 | BICF2P83958             | 33620956 | A | 0    | 0      | G |
| 20 | BICF2P989204            | 33633587 | A | 0    | 0      | G |
| 20 | BICF2S23124465          | 33645257 | A | 0.25 | 0.2857 | G |
| 20 | BICF2S23532589          | 33651745 | A | 0.25 | 0.2    | G |
| 20 | BICF2S2395943           | 33668193 | G | 0.25 | 0.2857 | A |
| 20 | BICF2P1153357           | 33678630 | G | 0.25 | 0.2857 | A |
| 20 | BICF2S23530917          | 33685586 | A | 0    | 0      | G |
| 20 | BICF2S23158175          | 33699766 | G | 0.5  | 0.5    | A |
| 20 | BICF2S23729124          | 33717594 | G | 0.5  | 0.4286 | A |
| 20 | BICF2P851180            | 33720397 | A | 0.5  | 0.4286 | C |
| 20 | BICF2P728959            | 33729879 | 0 | 0    | 0      | G |
| 20 | BICF2S2417815           | 33755889 | A | 0.5  | 0.5    | G |
| 20 | BICF2P435422            | 33777240 | 0 | 0    | 0      | A |
| 20 | TIGRP2P274092_rs8660654 | 33795210 | 0 | 0    | 0      | A |
| 20 | BICF2S23437874          | 33808958 | G | 0    | 0      | A |
| 20 | BICF2P478279            | 33818500 | C | 0    | 0      | A |
| 20 | BICF2S2379970           | 33828213 | A | 0    | 0      | G |
| 20 | G1099f67S256            | 33858037 | A | 0    | 0      | G |
| 20 | BICF2S23051305          | 33889153 | C | 0.75 | 0.7857 | A |
| 20 | BICF2P1269566           | 33899881 | 0 | 0    | 0      | A |
| 20 | BICF2S2322603           | 33917228 | G | 0.5  | 0.5    | A |
| 20 | BICF2P635716            | 33925839 | A | 0.25 | 0.2857 | G |
| 20 | BICF2P97495             | 33929975 | A | 0.5  | 0.5    | G |
| 20 | BICF2P97494             | 33930101 | G | 0.5  | 0.5    | A |
| 20 | BICF2P649622            | 33938641 | A | 0    | 0.25   | C |
| 20 | BICF2P1380483           | 33942135 | A | 0.25 | 0.2857 | G |
| 20 | TIGRP2P274093_rs9017722 | 33952880 | 0 | 0    | 0      | A |
| 20 | BICF2S22913685          | 33988239 | A | 0    | 0      | G |
| 20 | BICF2S23022092          | 34001051 | A | 0.25 | 0.2857 | G |
| 20 | BICF2P897521            | 34012935 | A | 0    | 0      | G |
| 20 | BICF2P264669            | 34021962 | A | 0.75 | 0.7143 | G |
| 20 | BICF2P542757            | 34031783 | G | 0    | 0      | A |

|    |                |          |   |      |        |   |
|----|----------------|----------|---|------|--------|---|
| 20 | BICF2S23552128 | 34047837 | A | 0    | 0      | G |
| 20 | BICF2P605325   | 34054936 | A | 0    | 0      | G |
| 20 | BICF2P565274   | 34064908 | A | 0.25 | 0.2143 | C |
| 20 | BICF2P1307483  | 34076014 | A | 0.5  | 0.4286 | G |
| 20 | BICF2P332501   | 34087570 | G | 0.75 | 0.7143 | A |
| 20 | BICF2P204754   | 34090906 | A | 0.25 | 0.2143 | G |
| 20 | BICF2P908798   | 34107899 | A | 0.5  | 0.5    | G |
| 20 | BICF2S23535423 | 34116872 | A | 0.25 | 0.2857 | G |
| 20 | BICF2P908975   | 34131854 | A | 0.25 | 0.2143 | G |
| 20 | BICF2P908983   | 34132662 | A | 0.25 | 0.2143 | G |
| 20 | BICF2S2314485  | 34152162 | A | 0.5  | 0.5    | G |
| 20 | BICF2P1239212  | 34155561 | A | 0.25 | 0.2143 | G |
| 20 | BICF2S23622762 | 34170568 | A | 0.5  | 0.5    | T |
| 20 | BICF2P1149592  | 34172082 | G | 0.5  | 0.5    | A |
| 20 | BICF2P802408   | 34184640 | A | 0.25 | 0.2143 | G |
| 20 | BICF2P292564   | 34198257 | G | 0.25 | 0.2143 | A |
| 20 | BICF2S23511195 | 34201797 | G | 0.5  | 0.4286 | A |
| 20 | BICF2P648619   | 34220177 | A | 0.25 | 0.2143 | G |
| 20 | BICF2S2377977  | 34228957 | A | 0.75 | 0.7857 | G |
| 20 | BICF2S23551778 | 34238966 | A | 0.5  | 0.5714 | G |
| 20 | BICF2P931524   | 34249951 | A | 0.25 | 0.1667 | G |
| 20 | BICF2P936971   | 34278133 | A | 1    | 1      | C |
| 20 | BICF2P893120   | 34291048 | A | 1    | 1      | G |
| 20 | BICF2P151861   | 34293823 | A | 1    | 1      | C |
| 20 | BICF2P775236   | 34299525 | A | 1    | 1      | G |
| 20 | BICF2P861712   | 34310106 | A | 1    | 0.7857 | G |
| 20 | BICF2P191363   | 34316839 | G | 0.25 | 0.2143 | A |
| 20 | BICF2P180334   | 34333557 | G | 0.25 | 0.2143 | A |
| 20 | BICF2P696534   | 34348202 | G | 0.25 | 0.2143 | A |
| 20 | BICF2P907365   | 34355136 | C | 0.75 | 0.7857 | A |
| 20 | BICF2P872962   | 34364925 | A | 0    | 0      | C |
| 20 | BICF2S2375206  | 34383300 | A | 0.25 | 0.2143 | C |
| 20 | BICF2P947836   | 34386080 | G | 0.75 | 0.7857 | A |
| 20 | BICF2S23042059 | 34399941 | A | 0.25 | 0.2143 | G |
| 20 | BICF2S22944418 | 34418314 | G | 0    | 0      | A |
| 20 | BICF2P404415   | 34446773 | G | 0    | 0      | A |
| 20 | BICF2S23442394 | 34461423 | A | 0    | 0      | G |
| 20 | BICF2P882643   | 34465722 | A | 0.5  | 0.4286 | C |
| 20 | BICF2S22914895 | 34483468 | G | 0    | 0      | A |
| 20 | BICF2S23121349 | 34510794 | G | 0    | 0.1    | A |
| 20 | BICF2S23442756 | 34514260 | A | 0.25 | 0.2143 | G |
| 20 | BICF2P614386   | 34542219 | C | 0.25 | 0.2143 | A |
| 20 | BICF2P249212   | 34548218 | A | 0    | 0      | G |
| 20 | BICF2S23715966 | 34560108 | G | 0.5  | 0.4286 | A |
| 20 | BICF2P477363   | 34579937 | 0 | 0    | 0      | A |
| 20 | BICF2P992882   | 34582805 | A | 0    | 0      | G |
| 20 | BICF2P1423766  | 34594689 | G | 0    | 0      | A |

|    |                         |          |   |      |        |   |
|----|-------------------------|----------|---|------|--------|---|
| 20 | BICF2P652049            | 34619934 | A | 0    | 0      | G |
| 20 | BICF2P421709            | 34635778 | 0 | 0    | 0      | A |
| 20 | BICF2P567843            | 34643110 | G | 0    | 0      | A |
| 20 | BICF2P1069101           | 34651569 | G | 0    | 0      | A |
| 20 | BICF2P970283            | 34672337 | A | 0    | 0      | G |
| 20 | BICF2P1131728           | 34680026 | G | 0    | 0      | C |
| 20 | BICF2P107198            | 34685631 | G | 0    | 0      | A |
| 20 | BICF2S23314134          | 34701749 | G | 0.25 | 0.2857 | A |
| 20 | TIGRP2P274101_rs8665005 | 34711679 | 0 | 0    | 0      | C |
| 20 | BICF2P763105            | 34729800 | A | 0.5  | 0.4286 | T |
| 20 | BICF2P339944            | 34733448 | A | 0.5  | 0.4286 | G |
| 20 | BICF2P491794            | 34743379 | A | 0.5  | 0.4286 | G |
| 20 | BICF2P995880            | 34755165 | G | 0.25 | 0.2857 | C |
| 20 | BICF2P620710            | 34773672 | 0 | 0    | 0      | A |
| 20 | BICF2P440529            | 34776500 | 0 | 0    | 0      | A |
| 20 | BICF2S23454541          | 34818927 | A | 0.5  | 0.4286 | G |
| 20 | BICF2P1303430           | 34831868 | A | 0.5  | 0.4286 | G |
| 20 | BICF2P105252            | 34841175 | A | 0.5  | 0.4286 | C |
| 20 | BICF2P1320326           | 34856730 | A | 0.25 | 0.2857 | C |
| 20 | BICF2P1382172           | 34875955 | A | 0.5  | 0.4286 | G |
| 20 | BICF2P494098            | 34884907 | C | 0.5  | 0.4286 | G |
| 20 | BICF2S23150200          | 34905033 | A | 0.25 | 0.2857 | G |
| 20 | BICF2P1425181           | 34934336 | A | 0.25 | 0.2857 | G |
| 20 | BICF2S23018607          | 34938876 | G | 0    | 0      | A |
| 20 | BICF2S23539901          | 34959076 | G | 0.25 | 0.2857 | A |
| 20 | BICF2P1051068           | 34972442 | 0 | 0    | 0      | C |
| 20 | BICF2P1052059           | 34986696 | C | 1    | 0.7143 | A |
| 20 | BICF2P1091664           | 34994340 | A | 0.75 | 0.7143 | G |
| 20 | BICF2P1190587           | 34996458 | A | 0.5  | 0.4286 | G |
| 20 | BICF2S2316953           | 35016721 | C | 0.5  | 0.4286 | A |
| 20 | BICF2P1035295           | 35017589 | A | 0.5  | 0.4286 | G |
| 20 | BICF2P1371908           | 35050029 | A | 0.5  | 0.5714 | C |
| 20 | BICF2P1385455           | 35055778 | C | 0.5  | 0.4    | A |
| 20 | BICF2P565247            | 35059543 | A | 0.5  | 0.4286 | G |
| 20 | BICF2P1273641           | 35067484 | C | 0.75 | 0.7143 | A |
| 20 | BICF2P603674            | 35079756 | A | 0.5  | 0.4286 | G |
| 20 | BICF2P425389            | 35094064 | A | 0.5  | 0.4    | G |
| 20 | BICF2S23211208          | 35108426 | A | 0.5  | 0.4286 | G |
| 20 | BICF2P1033969           | 35110897 | A | 0.75 | 0.7143 | G |
| 20 | BICF2P1033974           | 35112488 | A | 0.25 | 0.2857 | G |
| 20 | BICF2P1319593           | 35124559 | G | 0.25 | 0.2857 | A |
| 20 | BICF2P193800            | 35138177 | A | 0.25 | 0.2857 | G |
| 20 | BICF2P565233            | 35146465 | A | 0.5  | 0.5714 | G |
| 20 | BICF2P1020571           | 35156843 | A | 0.25 | 0.2857 | G |
| 20 | BICF2P917391            | 35169683 | A | 0.25 | 0.2857 | C |
| 20 | BICF2P862106            | 35184789 | G | 0.25 | 0.2857 | A |
| 20 | TIGRP2P274108_rs9028211 | 35195159 | 0 | 0    | 0      | G |



|    |                         |          |   |      |        |   |
|----|-------------------------|----------|---|------|--------|---|
| 20 | BICF2P956125            | 35223034 | A | 0.5  | 0.4    | G |
| 20 | BICF2P1416538           | 35227403 | 0 | 0    | 0      | G |
| 20 | BICF2P792032            | 35276415 | A | 0.5  | 0.4286 | G |
| 20 | BICF2S22915991          | 35296641 | G | 0.25 | 0.2143 | A |
| 20 | BICF2P873804            | 35312950 | G | 0.25 | 0.2143 | A |
| 20 | BICF2P1003488           | 35319944 | G | 0.25 | 0.2143 | A |
| 20 | BICF2S23046041          | 35329468 | A | 0.5  | 0.5    | G |
| 20 | BICF2P940897            | 35331747 | G | 0.5  | 0.5    | A |
| 20 | BICF2S23318827          | 35347676 | G | 0.75 | 0.7857 | A |
| 20 | BICF2S23151353          | 35351778 | A | 0.5  | 0.5    | C |
| 20 | BICF2P896116            | 35369531 | A | 0    | 0      | G |
| 20 | BICF2P1099189           | 35374160 | 0 | 0    | 0      | A |
| 20 | BICF2P1053534           | 35414222 | C | 0    | 0      | A |
| 20 | BICF2P1299805           | 35422910 | C | 0.5  | 0.5714 | A |
| 20 | BICF2P229498            | 35432466 | A | 1    | 1      | G |
| 20 | BICF2P415765            | 35445677 | A | 0.5  | 0.5    | G |
| 20 | BICF2P533916            | 35458020 | 0 | 0    | 0      | C |
| 20 | BICF2P689338            | 35467946 | A | 0.25 | 0.2857 | G |
| 20 | BICF2S2371429           | 35480232 | A | 0.75 | 0.7143 | G |
| 20 | BICF2P1101010           | 35496974 | A | 0.25 | 0.2857 | G |
| 20 | BICF2P86087             | 35509327 | T | 0.75 | 0.7143 | A |
| 20 | BICF2P1434672           | 35513102 | 0 | 0    | 0      | G |
| 20 | BICF2P966245            | 35523550 | C | 0.75 | 0.7857 | A |
| 20 | BICF2S23122616          | 35536823 | A | 0.5  | 0.5    | G |
| 20 | BICF2P325051            | 35554867 | A | 0    | 0      | G |
| 20 | BICF2S2368355           | 35564241 | A | 0.5  | 0.5    | G |
| 20 | BICF2P1193630           | 35571577 | G | 0.5  | 0.5    | A |
| 20 | TIGRP2P274119_rs8791885 | 35606096 | 0 | 0    | 0      | G |
| 20 | BICF2P45453             | 35621051 | 0 | 0    | 0      | A |
| 20 | BICF2P472820            | 35641570 | 0 | 0    | 0      | A |
| 20 | BICF2P672683            | 35741445 | 0 | 0    | 0      | A |
| 20 | BICF2P306791            | 35747114 | A | 0.25 | 0.2857 | G |
| 20 | BICF2P1351545           | 35759519 | A | 0.25 | 0.2857 | G |
| 20 | BICF2P933076            | 35765693 | G | 0.75 | 0.7143 | A |
| 20 | BICF2P946158            | 35776860 | C | 0.25 | 0.2857 | A |
| 20 | G1101f39S177            | 35808221 | 0 | 0    | 0      | C |
| 20 | BICF2P209561            | 35831558 | 0 | 0    | 0      | G |
| 20 | BICF2P795409            | 35855709 | G | 0.5  | 0.4286 | A |
| 20 | BICF2P238519            | 35858358 | C | 0.75 | 0.7143 | A |
| 20 | BICF2S2341130           | 35871129 | A | 0.25 | 0.2143 | G |
| 20 | BICF2P164597            | 35881055 | G | 0.25 | 0.2143 | A |
| 20 | BICF2P141944            | 35907822 | A | 0.25 | 0.2143 | G |
| 20 | BICF2P911819            | 35935416 | 0 | 0    | 0      | A |
| 20 | BICF2P1118866           | 35942156 | T | 0.5  | 0.5714 | A |
| 20 | BICF2S23736633          | 35951253 | A | 0    | 0.2857 | G |
| 20 | BICF2S23639696          | 35974167 | A | 0    | 0      | G |
| 20 | TIGRP2P274128_rs9139857 | 35983785 | 0 | 0    | 0      | A |

|    |                         |          |   |      |        |   |
|----|-------------------------|----------|---|------|--------|---|
| 20 | BICF2S23333987          | 36006050 | T | 0    | 0      | A |
| 20 | BICF2P1101371           | 36007529 | 0 | 0    | 0      | A |
| 20 | BICF2P909069            | 36041804 | 0 | 0    | 0      | A |
| 20 | G1102f25S86             | 36081820 | A | 0.25 | 0.2143 | G |
| 20 | BICF2S23445624          | 36096928 | A | 0.25 | 0.2143 | G |
| 20 | TIGRP2P274130_rs8504660 | 36099833 | 0 | 0    | 0      | T |
| 20 | BICF2P620871            | 36117153 | A | 0.25 | 0.2143 | G |
| 20 | BICF2S23140888          | 36139907 | G | 0.25 | 0.2143 | A |
| 20 | BICF2P340239            | 36173504 | A | 0.25 | 0.2857 | G |
| 20 | TIGRP2P274133_rs8541205 | 36179718 | 0 | 0    | 0      | G |
| 20 | BICF2P835446            | 36198456 | A | 0.25 | 0.2143 | G |
| 20 | BICF2P1390101           | 36202810 | A | 0.75 | 0.7857 | C |
| 20 | BICF2S23419039          | 36226526 | A | 0    | 0      | G |
| 20 | BICF2P6270              | 36241203 | A | 0.25 | 0.2857 | G |
| 20 | BICF2P584712            | 36259186 | A | 0.25 | 0.2857 | G |
| 20 | BICF2P506675            | 36266536 | G | 0.25 | 0.2143 | A |
| 20 | BICF2P409766            | 36278627 | C | 0.25 | 0.25   | A |
| 20 | BICF2S22919530          | 36286137 | A | 0.25 | 0.2857 | G |
| 20 | BICF2P548361            | 36302310 | A | 0.5  | 0.5714 | G |
| 20 | BICF2S2309267           | 36310170 | A | 0    | 0      | G |
| 20 | BICF2S23432636          | 36319043 | A | 0    | 0      | C |
| 20 | BICF2P604696            | 36336266 | C | 0    | 0.25   | G |
| 20 | BICF2P1316645           | 36345786 | A | 0    | 0      | G |
| 20 | BICF2S2417760           | 36354466 | A | 0    | 0      | G |
| 20 | BICF2S23451018          | 36368790 | 0 | 0    | 0      | G |
| 20 | BICF2P238383            | 36380372 | C | 0.5  | 0.5    | A |
| 20 | BICF2P1161753           | 36391262 | C | 0.5  | 0.5    | A |
| 20 | BICF2P1261773           | 36403822 | G | 0.75 | 0.7143 | A |
| 20 | BICF2S2392720           | 36412973 | G | 0.5  | 0.5    | A |
| 20 | BICF2P787139            | 36413651 | A | 0.25 | 0.2857 | G |
| 20 | BICF2S2343757           | 36431095 | G | 1    | 1      | A |
| 20 | BICF2S2355724           | 36435937 | C | 0    | 0      | A |
| 20 | BICF2P588908            | 36449049 | C | 0.25 | 0.2857 | A |
| 20 | BICF2P1128857           | 36451036 | A | 0.25 | 0.2857 | G |
| 20 | BICF2P509757            | 36454870 | G | 0.5  | 0.5714 | A |
| 20 | BICF2P857939            | 36467770 | G | 0.5  | 0.5    | A |
| 20 | BICF2P1436770           | 36488075 | A | 0.25 | 0.2143 | G |
| 20 | BICF2S23418059          | 36499308 | A | 0.75 | 0.9    | G |
| 20 | BICF2P887503            | 36508245 | G | 0.75 | 0.7857 | A |
| 20 | BICF2P1383541           | 36515402 | A | 0.75 | 0.7857 | C |
| 20 | BICF2P207899            | 36528530 | G | 0.25 | 0.2857 | A |
| 20 | BICF2P1418946           | 36536424 | G | 0.75 | 0.7857 | A |
| 20 | BICF2P82245             | 36548262 | C | 0.5  | 0.5    | A |
| 20 | BICF2P565136            | 36558754 | 0 | 0    | 0      | A |
| 20 | BICF2P703514            | 36573218 | A | 0.5  | 0.5    | G |
| 20 | BICF2S23038726          | 36582530 | C | 0    | 0      | A |
| 20 | BICF2P1315008           | 36586720 | G | 0.25 | 0.2143 | A |

|    |                         |          |   |      |        |   |
|----|-------------------------|----------|---|------|--------|---|
| 20 | BICF2S2349212           | 36594334 | 0 | 0    | 0      | G |
| 20 | BICF2P1249290           | 36605119 | A | 0.75 | 0.7857 | G |
| 20 | BICF2S23130613          | 36616491 | A | 0    | 0      | C |
| 20 | BICF2P1078264           | 36638018 | G | 0    | 0      | A |
| 20 | BICF2P1328570           | 36645228 | G | 0.25 | 0.2143 | A |
| 20 | BICF2P138486            | 36651141 | A | 0.25 | 0      | G |
| 20 | BICF2S23432764          | 36662020 | C | 0.25 | 0.2857 | A |
| 20 | BICF2P1421842           | 36676605 | A | 0.25 | 0.2857 | G |
| 20 | BICF2P579836            | 36688501 | 0 | 0    | 0      | A |
| 20 | BICF2P689008            | 36698151 | 0 | 0    | 0      | A |
| 20 | BICF2P1072022           | 36708523 | 0 | 0    | 0      | A |
| 20 | TIGRP2P274140_rs8900315 | 36720527 | 0 | 0    | 0      | T |
| 20 | BICF2P360854            | 36740931 | A | 0.25 | 0.2857 | T |
| 20 | BICF2P416334            | 36750334 | A | 0    | 0      | G |
| 20 | BICF2P258646            | 36765450 | G | 0.25 | 0.2857 | A |
| 20 | BICF2S2326018           | 36772772 | A | 0    | 0      | C |
| 20 | BICF2P714910            | 36781109 | A | 0.5  | 0.5    | G |
| 20 | BICF2P327039            | 36794737 | G | 0.75 | 0.7857 | A |
| 20 | BICF2P1056591           | 36800031 | 0 | 0    | 0      | A |
| 20 | BICF2S22958474          | 36815563 | C | 0.5  | 0.5714 | A |
| 20 | BICF2S23341022          | 36832917 | G | 0.5  | 0.4286 | A |
| 20 | BICF2P797395            | 36844754 | A | 0.25 | 0.2857 | C |
| 20 | BICF2P767965            | 36849268 | 0 | 0    | 0      | A |
| 20 | BICF2P608500            | 36857733 | G | 0.25 | 0.2143 | C |
| 20 | BICF2S2353137           | 36875155 | 0 | 0    | 0      | A |
| 20 | BICF2P504465            | 36880717 | G | 0.25 | 0.2857 | A |
| 20 | BICF2P979689            | 36907192 | A | 0.5  | 0.5714 | T |
| 20 | BICF2P887210            | 36927391 | A | 0.5  | 0.4286 | G |
| 20 | TIGRP2P274142_rs9002063 | 36940867 | 0 | 0    | 0      | A |
| 20 | BICF2P1159084           | 36954842 | A | 0.25 | 0.25   | C |
| 20 | BICF2S23235035          | 36963436 | A | 0.25 | 0.2857 | C |
| 20 | BICF2P654731            | 36977895 | A | 0.25 | 0.2857 | G |
| 20 | BICF2P834078            | 36993157 | A | 0.5  | 0.4167 | G |
| 20 | BICF2S2311568           | 37016202 | G | 0.25 | 0.2857 | A |
| 20 | BICF2P597231            | 37028317 | G | 0.25 | 0.2857 | A |
| 20 | BICF2P328353            | 37031837 | A | 0.5  | 0.4286 | C |
| 20 | BICF2P178403            | 37044813 | A | 0.5  | 0.5714 | G |
| 20 | BICF2P93013             | 37057000 | G | 0.5  | 0.5714 | A |
| 20 | BICF2P1069562           | 37072267 | A | 0.5  | 0.5714 | T |
| 20 | BICF2P630487            | 37084612 | 0 | 0    | 0      | A |
| 20 | BICF2P417326            | 37093392 | C | 0.5  | 0.5714 | A |
| 20 | BICF2P1319754           | 37121999 | A | 0.5  | 0.5714 | G |
| 20 | BICF2P1331860           | 37137011 | A | 0    | 0      | C |
| 20 | BICF2P524343            | 37151886 | A | 0.25 | 0.2857 | G |
| 20 | BICF2S2342816           | 37157470 | G | 0.5  | 0.5714 | A |
| 20 | BICF2P1446666           | 37175570 | C | 0.5  | 0.5714 | G |
| 20 | BICF2P803611            | 37185124 | A | 0.5  | 0.5714 | G |

|    |                         |          |   |      |        |   |
|----|-------------------------|----------|---|------|--------|---|
| 20 | BICF2P1299418           | 37201780 | A | 0.5  | 0.5714 | T |
| 20 | BICF2P577332            | 37206944 | A | 0.5  | 0.5714 | C |
| 20 | BICF2P714149            | 37218221 | 0 | 0    | 0      | G |
| 20 | BICF2P1297167           | 37232759 | A | 0.5  | 0.5714 | G |
| 20 | BICF2S23746763          | 37244311 | A | 0    | 0      | G |
| 20 | BICF2P153447            | 37270947 | A | 0.5  | 0.5714 | G |
| 20 | BICF2P845017            | 37271785 | A | 0.5  | 0.5714 | G |
| 20 | BICF2P391353            | 37304389 | G | 0.5  | 0.5714 | A |
| 20 | BICF2P1185151           | 37306728 | A | 0.25 | 0.2    | G |
| 20 | BICF2P570451            | 37318856 | G | 0.5  | 0.5714 | A |
| 20 | BICF2P890477            | 37332926 | G | 0.5  | 0.5714 | A |
| 20 | BICF2S23536977          | 37347332 | G | 0.25 | 0.2857 | A |
| 20 | BICF2P351086            | 37357365 | A | 0.25 | 0.2857 | C |
| 20 | BICF2P640659            | 37364752 | A | 0    | 0      | G |
| 20 | BICF2P1014131           | 37391734 | G | 0    | 0.2857 | A |
| 20 | BICF2P1095841           | 37402279 | C | 0.5  | 0.5    | G |
| 20 | BICF2P242615            | 37407671 | G | 0.25 | 0.2143 | A |
| 20 | BICF2P1275114           | 37419764 | A | 0.25 | 0.2143 | G |
| 20 | BICF2P1275115           | 37422199 | A | 0.25 | 0.2143 | G |
| 20 | BICF2P150597            | 37434644 | G | 0    | 0.2143 | A |
| 20 | BICF2P802476            | 37445845 | A | 0.25 | 0.2143 | G |
| 20 | BICF2P326248            | 37461170 | A | 0.25 | 0.2143 | G |
| 20 | BICF2P1406747           | 37470677 | A | 0.5  | 0.5714 | G |
| 20 | TIGRP2P274149_rs8633159 | 37484849 | 0 | 0    | 0      | G |
| 20 | BICF2P767658            | 37493872 | G | 0.5  | 0.4286 | A |
| 20 | BICF2P569121            | 37504401 | A | 0    | 0      | G |
| 20 | BICF2P783011            | 37519876 | C | 0.25 | 0.2857 | A |
| 20 | BICF2P1038301           | 37525522 | A | 0.25 | 0.25   | G |
| 20 | BICF2P567453            | 37543835 | C | 0.25 | 0.2857 | A |
| 20 | BICF2P1049708           | 37552820 | A | 0.25 | 0.2857 | C |
| 20 | BICF2P1347476           | 37561148 | G | 0.25 | 0.2857 | A |
| 20 | BICF2P1107941           | 37572541 | A | 0.25 | 0.2857 | G |
| 20 | BICF2P1070851           | 37583931 | G | NA   | 0.5    | A |
| 20 | BICF2P936439            | 37615435 | A | 0    | 0      | G |
| 20 | BICF2P13619             | 37624286 | A | 0    | 0      | G |
| 20 | BICF2P995970            | 37629424 | A | 0.75 | 0.7857 | G |
| 20 | TIGRP2P274151_rs8899781 | 37640845 | 0 | 0    | 0      | A |
| 20 | BICF2P240255            | 37651111 | G | 0    | 0      | A |
| 20 | BICF2S23249245          | 37670588 | G | 0.25 | 0.2857 | A |
| 20 | BICF2P184677            | 37688595 | G | 0    | 0      | A |
| 20 | BICF2P980224            | 37715899 | A | 0.25 | 0.2857 | G |
| 20 | BICF2S23432683          | 37728673 | A | 0    | 0      | G |
| 20 | BICF2P87603             | 37732625 | G | 0.5  | 0.5    | A |
| 20 | BICF2P533833            | 37744037 | C | 0.75 | 0.7143 | A |
| 20 | BICF2P567286            | 37761149 | G | 0.75 | 0.7143 | C |
| 20 | BICF2P1110958           | 37772947 | A | 0.25 | 0.2857 | G |
| 20 | BICF2P109375            | 37777828 | G | 0    | 0      | A |

|    |                         |          |   |      |        |   |
|----|-------------------------|----------|---|------|--------|---|
| 20 | BICF2S23254956          | 37794481 | A | 0.5  | 0.4286 | G |
| 20 | BICF2P1118410           | 37800493 | A | 0    | 0      | G |
| 20 | BICF2S23053585          | 37804882 | G | 0    | 0      | A |
| 20 | BICF2P452859            | 37821249 | A | 0    | 0      | T |
| 20 | BICF2P1416133           | 37834880 | G | 0    | 0      | A |
| 20 | BICF2P1002787           | 37839662 | A | 0    | 0      | G |
| 20 | BICF2P825504            | 37855752 | G | 0.25 | 0.2857 | A |
| 20 | BICF2P1220625           | 37863460 | C | 0.25 | 0.2857 | G |
| 20 | BICF2P1268613           | 37871696 | A | 0.5  | 0.5    | G |
| 20 | BICF2P249939            | 37884109 | G | 0.25 | 0.2143 | A |
| 20 | BICF2P556372            | 37898781 | A | 0.25 | 0.2857 | G |
| 20 | BICF2P1431138           | 37904835 | A | 0    | 0      | C |
| 20 | BICF2P311636            | 37919874 | 0 | 0    | 0      | G |
| 20 | BICF2S23035052          | 37931746 | A | 0    | 0      | G |
| 20 | BICF2S22912658          | 37941869 | A | 0    | 0      | G |
| 20 | BICF2P1140924           | 37952666 | A | 0    | 0      | G |
| 20 | BICF2S23350738          | 37971184 | A | 0.25 | 0.2143 | G |
| 20 | BICF2P1322698           | 37973660 | A | 0.25 | 0.2857 | G |
| 20 | BICF2S23137788          | 37991690 | A | 0.25 | 0.2857 | G |
| 20 | BICF2S23024906          | 38006332 | 0 | 0    | 0      | G |
| 20 | BICF2P1365288           | 38018459 | C | 0.5  | 0.5714 | A |
| 20 | BICF2S23418523          | 38021432 | A | 0.75 | 0.7857 | C |
| 20 | BICF2P1156294           | 38035127 | A | 0.5  | 0.5    | G |
| 20 | BICF2S2347989           | 38047222 | A | 0.25 | 0.2857 | C |
| 20 | BICF2P253794            | 38049129 | A | 0.25 | 0.2857 | G |
| 20 | BICF2P1093196           | 38061809 | C | 0.25 | 0.2857 | A |
| 20 | BICF2P883281            | 38069064 | A | 0.75 | 0.7143 | G |
| 20 | BICF2S23131037          | 38078140 | A | 0.5  | 0.5    | G |
| 20 | BICF2S23633808          | 38093435 | G | 0    | 0      | A |
| 20 | BICF2S23720315          | 38102236 | A | 0.25 | 0.2143 | G |
| 20 | BICF2P1125468           | 38121159 | G | 0.5  | 0.5    | A |
| 20 | BICF2P659801            | 38124607 | A | 0.25 | 0.2143 | G |
| 20 | BICF2P806329            | 38143434 | G | 0.25 | 0.2143 | A |
| 20 | BICF2P79938             | 38145707 | A | 0.75 | 0.7857 | G |
| 20 | BICF2P929613            | 38168467 | A | 0.75 | 0.7857 | G |
| 20 | BICF2P45399             | 38174297 | C | 0.25 | 0.2857 | A |
| 20 | BICF2P1161844           | 38185345 | A | 0.5  | 0.5714 | G |
| 20 | BICF2P166197            | 38202643 | C | 0    | 0      | A |
| 20 | BICF2P593604            | 38208206 | G | 0.5  | 0.5    | A |
| 20 | BICF2P556568            | 38218486 | A | 0.25 | 0.2857 | C |
| 20 | BICF2P145195            | 38229908 | G | 0.5  | 0.5714 | A |
| 20 | BICF2S23763399          | 38244243 | A | 0.75 | 0.8333 | G |
| 20 | TIGRP2P274175_rs8983387 | 38252722 | A | 0    | 0      | G |
| 20 | TIGRP2P274178_rs8624699 | 38271435 | G | 0    | 0      | A |
| 20 | BICF2S23150620          | 38279993 | A | 0.25 | 0.2143 | G |
| 20 | BICF2S2396029           | 38291561 | C | 0.75 | 0.7857 | G |
| 20 | BICF2P615               | 38300677 | 0 | 0    | 0      | G |

|    |                         |          |   |      |        |   |
|----|-------------------------|----------|---|------|--------|---|
| 20 | BICF2P204686            | 38308568 | 0 | 0    | 0      | G |
| 20 | BICF2S23511027          | 38323470 | 0 | 0    | 0      | G |
| 20 | BICF2P1302216           | 38331052 | 0 | 0    | 0      | G |
| 20 | BICF2P363750            | 38346060 | A | 0    | 0      | G |
| 20 | BICF2P349699            | 38378618 | A | 0.25 | 0.2143 | G |
| 20 | BICF2P580234            | 38416458 | A | 0.25 | 0.2857 | G |
| 20 | TIGRP2P274199_rs8785028 | 38423788 | G | 0.25 | 0.2857 | A |
| 20 | TIGRP2P274207_rs9061745 | 38453524 | A | 0.25 | 0.2857 | G |
| 20 | BICF2S23613968          | 38458745 | G | 0.25 | 0.2857 | A |
| 20 | BICF2P766881            | 38478158 | A | 0    | 0      | G |
| 20 | BICF2S23737354          | 38481859 | A | 0    | 0      | G |
| 20 | BICF2P73434             | 38491171 | G | 0.25 | 0.2857 | A |
| 20 | BICF2P247805            | 38507160 | G | 0.25 | 0.2857 | A |
| 20 | BICF2P1294383           | 38524299 | A | 0.25 | 0.2857 | G |
| 20 | BICF2P1132825           | 38533351 | G | 0.25 | 0.2857 | A |
| 20 | TIGRP2P274225_rs8807492 | 38537230 | A | 0.25 | 0.2857 | C |
| 20 | BICF2P905262            | 38557300 | G | 0.5  | 0.5714 | A |
| 20 | BICF2P905264            | 38558105 | G | 0.25 | 0.2857 | A |
| 20 | BICF2P1197568           | 38559676 | G | 0.25 | 0.2857 | A |
| 20 | TIGRP2P274248_rs8913585 | 38577098 | G | 0.5  | 0.5    | A |
| 20 | TIGRP2P274254_rs8999485 | 38583592 | A | 0.5  | 0.5    | G |
| 20 | BICF2P394250            | 38611225 | G | 0.5  | 0.5714 | A |
| 20 | BICF2S23326149          | 38623467 | G | 0.5  | 0.5714 | A |
| 20 | TIGRP2P274276_rs8982877 | 38628887 | G | 0.5  | 0.5714 | A |
| 20 | BICF2P142923            | 38651068 | G | 0.25 | 0.2857 | A |
| 20 | TIGRP2P274278_rs8678494 | 38654208 | A | 0    | 0      | C |
| 20 | BICF2P206924            | 38673243 | 0 | 0    | 0      | G |
| 20 | BICF2S23153451          | 38680367 | G | 0.75 | 0.7143 | A |
| 20 | BICF2P29197             | 38690827 | C | 0    | 0      | G |
| 20 | BICF2P259548            | 38708758 | 0 | 0    | 0      | A |
| 20 | BICF2P1125917           | 38715045 | 0 | 0    | 0      | A |
| 20 | BICF2P1284049           | 38728104 | A | 0.25 | 0.2857 | G |
| 20 | BICF2S23547382          | 38734047 | A | 0.25 | 0.2857 | G |
| 20 | TIGRP2P274298_rs8969277 | 38744377 | A | 0.25 | 0.2143 | G |
| 20 | BICF2S23315307          | 38791186 | C | 0.25 | 0.2143 | A |
| 20 | BICF2P799609            | 38819514 | A | 0    | 0      | G |
| 20 | BICF2S23037415          | 38839723 | A | 0.25 | 0.2143 | C |
| 20 | BICF2S23324813          | 38850934 | G | 0.25 | 0.2143 | A |
| 20 | BICF2S23549218          | 38864849 | G | 0.25 | 0.2143 | C |
| 20 | BICF2P1271357           | 38881393 | G | 0.25 | 0.2857 | A |
| 20 | BICF2P1271356           | 38881718 | G | 0.25 | 0.2857 | A |
| 20 | TIGRP2P274327_rs9015994 | 38891186 | C | 0    | 0      | G |
| 20 | BICF2P274262            | 38892033 | C | 0    | 0      | A |
| 20 | BICF2P876779            | 38895445 | G | 0.25 | 0.2857 | A |
| 20 | BICF2P1154018           | 38905020 | 0 | 0    | 0      | A |
| 20 | BICF2S23619453          | 38916253 | G | 0.25 | 0.25   | A |
| 20 | BICF2S2341222           | 38919036 | G | 0.25 | 0.2857 | A |

|    |                         |          |   |      |        |   |
|----|-------------------------|----------|---|------|--------|---|
| 20 | TIGRP2P274353_rs9010321 | 38939874 | G | 0.25 | 0.1667 | A |
| 20 | TIGRP2P274354_rs9122660 | 38954833 | 0 | 0    | 0      | C |
| 20 | BICF2P536314            | 38996472 | 0 | 0    | 0      | A |
| 20 | BICF2P1463644           | 39017353 | 0 | 0    | 0      | A |
| 20 | BICF2P1297995           | 39031915 | 0 | 0    | 0      | G |
| 20 | BICF2S23445300          | 39048024 | 0 | 0    | 0      | G |
| 20 | BICF2P272829            | 39056905 | G | 0    | 0      | A |
| 20 | BICF2P524606            | 39071508 | A | 0    | 0      | G |
| 20 | TIGRP2P274360_rs8970819 | 39098878 | A | 1    | 1      | G |
| 20 | TIGRP2P274363_rs9242260 | 39102040 | 0 | 0    | 0      | G |
| 20 | BICF2P1015829           | 39117538 | C | 0    | 0      | G |
| 20 | BICF2P948355            | 39134215 | A | 0    | 0      | G |
| 20 | BICF2S23620989          | 39138554 | G | 0    | 0      | A |
| 20 | BICF2P1081825           | 39156399 | G | 0.25 | 0.2143 | C |
| 20 | BICF2S23656641          | 39177603 | 0 | 0    | 0      | C |
| 20 | BICF2S23615821          | 39191963 | A | 0    | 0      | G |
| 20 | BICF2S22934213          | 39216437 | A | 0    | 0      | G |
| 20 | BICF2P1411342           | 39222772 | C | 0.75 | 0.7857 | G |
| 20 | BICF2S23418753          | 39230593 | A | 0.75 | 0.7857 | G |
| 20 | BICF2P985961            | 39248587 | 0 | 0    | 0      | C |
| 20 | TIGRP2P274392_rs8615676 | 39257029 | G | 0    | 0      | A |
| 20 | BICF2S23040642          | 39280183 | A | 0.25 | 0.2143 | G |
| 20 | BICF2P1146348           | 39286809 | A | 0    | 0      | G |
| 20 | BICF2P1003129           | 39300477 | 0 | 0    | 0      | A |
| 20 | TIGRP2P274409_rs8604263 | 39317496 | C | 0.5  | 0.5714 | A |
| 20 | BICF2S23415735          | 39329755 | A | 0    | 0      | G |
| 20 | BICF2P961649            | 39331120 | A | 0.5  | 0.5714 | G |
| 20 | BICF2S23344904          | 39351635 | G | 0.5  | 0.5714 | A |
| 20 | BICF2S23749844          | 39354310 | G | 0    | 0      | A |
| 20 | BICF2P1242966           | 39365169 | A | 0.5  | 0.5714 | G |
| 20 | BICF2P1311079           | 39384135 | G | 0    | 0      | A |
| 20 | BICF2S23450151          | 39397583 | C | 0    | 0      | A |
| 20 | BICF2P629042            | 39403404 | A | 0    | 0      | G |
| 20 | BICF2S23052291          | 39420403 | A | 0    | 0      | G |
| 20 | BICF2S23053168          | 39423899 | C | 0    | 0      | A |
| 20 | BICF2P511271            | 39442285 | G | 0.25 | 0.2143 | A |
| 20 | BICF2P1380759           | 39446869 | 0 | 0    | 0      | G |
| 20 | BICF2S24116848          | 39463266 | 0 | 0    | 0      | A |
| 20 | BICF2P218206            | 39478879 | A | 0.5  | 0.4286 | G |
| 20 | BICF2P250892            | 39493516 | A | 0.25 | 0.2143 | G |
| 20 | BICF2P1392057           | 39495629 | A | 0.5  | 0.5714 | C |
| 20 | BICF2P1237851           | 39521817 | A | 0.75 | 0.7857 | G |
| 20 | TIGRP2P274460_rs8978009 | 39533473 | G | 0.25 | 0.2143 | A |
| 20 | TIGRP2P274463_rs8650813 | 39538236 | A | 0    | 0      | T |
| 20 | BICF2P19710             | 39555691 | G | 0.5  | 0.5833 | A |
| 20 | BICF2S23530636          | 39566415 | 0 | 0    | 0      | C |
| 20 | TIGRP2P274479_rs8843473 | 39571966 | 0 | 0    | 0      | A |

|    |                         |          |   |      |        |   |
|----|-------------------------|----------|---|------|--------|---|
| 20 | BICF2S23435992          | 39594103 | A | 1    | 0.7857 | C |
| 20 | TIGRP2P274481_rs9104880 | 39601350 | G | 0.75 | 0.7857 | A |
| 20 | TIGRP2P274484_rs8518558 | 39607334 | G | 0.75 | 0.7857 | A |
| 20 | BICF2P1281126           | 39626757 | G | 0    | 0      | A |
| 20 | TIGRP2P274490_rs8985988 | 39631567 | 0 | 0    | 0      | G |
| 20 | BICF2P1256101           | 39648199 | G | 0.75 | 0.7857 | A |
| 20 | BICF2P1410711           | 39673423 | A | 0.5  | 0.6    | G |
| 20 | BICF2P1184915           | 39683871 | A | 0    | 0      | G |
| 20 | TIGRP2P274519_rs8557673 | 39688602 | A | 0    | 0      | G |
| 20 | BICF2P16562             | 39701869 | A | 0    | 0      | G |
| 20 | BICF2P650365            | 39716185 | C | 0    | 0      | G |
| 20 | BICF2S23737248          | 39724670 | C | 0    | 0      | A |
| 20 | BICF2P1086967           | 39743089 | A | 0    | 0      | G |
| 20 | BICF2P88083             | 39777883 | G | 0    | 0      | A |
| 20 | BICF2S23447001          | 39787259 | G | 0.25 | 0.2143 | A |
| 20 | BICF2S23448192          | 39794609 | G | 0.25 | 0.2143 | A |
| 20 | BICF2P619863            | 39803010 | A | 0.25 | 0.2143 | G |
| 20 | BICF2P560295            | 39815670 | A | 0    | 0      | G |
| 20 | BICF2P749591            | 39830252 | A | 0.75 | 0.7857 | C |
| 20 | BICF2P931802            | 39849328 | A | 0.25 | 0.2143 | G |
| 20 | BICF2P572980            | 39866992 | A | 0    | 0      | G |
| 20 | BICF2P931677            | 39874189 | 0 | 0    | 0      | G |
| 20 | BICF2P1121692           | 39882838 | G | 0.25 | 0.2143 | A |
| 20 | BICF2P21596             | 39913132 | A | 0    | 0      | G |
| 20 | BICF2P543222            | 39917150 | A | 0    | 0      | G |
| 20 | BICF2P156233            | 39930910 | A | 0    | 0      | G |
| 20 | BICF2P931828            | 39961718 | G | 0.25 | 0.25   | A |
| 20 | TIGRP2P274572_rs8826153 | 39963157 | 0 | 0    | 0      | A |
| 20 | BICF2P1517439           | 39989570 | C | 0    | 0      | G |
| 20 | BICF2P248796            | 39997785 | G | 0    | 0      | A |
| 20 | TIGRP2P274583_rs9087882 | 39999512 | G | 0    | 0      | A |
| 20 | BICF2P1266674           | 40011590 | G | 0.75 | 0.7143 | A |
| 20 | BICF2S23649727          | 40031159 | A | 0    | 0      | G |
| 20 | TIGRP2P274650_rs8729935 | 40034671 | A | 0.5  | 0.5    | G |
| 20 | BICF2S23647940          | 40040167 | G | 0.75 | 0.7143 | A |
| 20 | BICF2S23647615          | 40044632 | A | 0.75 | 0.7143 | G |
| 20 | BICF2P1234355           | 40062290 | A | 0.75 | 0.7143 | G |
| 20 | BICF2P1347750           | 40066708 | A | 0    | 0      | C |
| 20 | TIGRP2P274694_rs9065474 | 40083869 | G | 0    | 0      | A |
| 20 | BICF2P387352            | 40096748 | G | 0    | 0      | C |
| 20 | BICF2P648632            | 40103371 | G | 0    | 0      | A |
| 20 | BICF2P46276             | 40130973 | 0 | 0    | 0      | A |
| 20 | BICF2P253495            | 40156747 | A | 0    | 0      | G |
| 20 | BICF2P370502            | 40159131 | G | 0    | 0      | A |
| 20 | BICF2P1099268           | 40176800 | A | 0    | 0      | C |
| 20 | TIGRP2P274707_rs8801864 | 40183710 | A | 0    | 0      | G |
| 20 | TIGRP2P274711_rs8952968 | 40214141 | A | 0    | 0      | G |



|    |                         |          |   |      |        |   |
|----|-------------------------|----------|---|------|--------|---|
| 20 | BICF2S2353851           | 40220631 | 0 | 0    | 0      | G |
| 20 | BICF2P360895            | 40234256 | A | 0    | 0      | G |
| 20 | BICF2P1239919           | 40248235 | A | 0    | 0      | G |
| 20 | BICF2S23259639          | 40254184 | 0 | 0    | 0      | A |
| 20 | BICF2S2368248           | 40270272 | G | 0.5  | 0.5    | A |
| 20 | TIGRP2P274714_rs8791044 | 40273761 | C | 0.25 | 0.2143 | G |
| 20 | TIGRP2P274715_rs8557950 | 40285447 | 0 | 0    | 0      | G |
| 20 | BICF2P766645            | 40305991 | 0 | 0    | 0      | A |
| 20 | BICF2P851987            | 40318000 | 0 | 0    | 0      | C |
| 20 | BICF2P1423782           | 40324765 | A | 0    | 0      | G |
| 20 | BICF2S2329701           | 40352813 | A | 0.5  | 0.5714 | G |
| 20 | BICF2S23144970          | 40361860 | T | 0.5  | 0.5714 | A |
| 20 | BICF2S23155809          | 40375560 | G | 0.5  | 0.5714 | A |
| 20 | BICF2S23428939          | 40383398 | G | 0.5  | 0.5714 | A |
| 20 | BICF2P959205            | 40399060 | C | 0    | 0      | A |
| 20 | BICF2S23231563          | 40410896 | C | 0.5  | 0.5714 | G |
| 20 | BICF2P538514            | 40432148 | 0 | 0    | 0      | G |
| 20 | BICF2S2317623           | 40443383 | G | 0.5  | 0.5714 | A |
| 20 | BICF2S22918930          | 40448078 | A | 0.5  | 0.5    | G |
| 20 | BICF2S2377152           | 40459640 | A | 0    | 0.2857 | G |
| 20 | BICF2P1368931           | 40469694 | 0 | 0    | 0      | C |
| 20 | BICF2P1360844           | 40489750 | A | 0    | 0      | C |
| 20 | BICF2P84512             | 40500505 | T | 0    | 0      | A |
| 20 | BICF2P1456852           | 40504345 | A | 0.5  | 0.5    | G |
| 20 | BICF2P1448965           | 40517365 | A | 0.5  | 0.5    | G |
| 20 | BICF2P769540            | 40526971 | 0 | 0    | 0      | G |
| 20 | BICF2P603050            | 40547831 | A | 0    | 0      | G |
| 20 | BICF2P241532            | 40554290 | 0 | 0    | 0      | A |
| 20 | BICF2S23035442          | 40564542 | A | 0.75 | 0.7143 | G |
| 20 | BICF2P1068569           | 40578303 | G | 0.5  | 0.5714 | A |
| 20 | BICF2P1068579           | 40579179 | A | 0.5  | 0.5714 | G |
| 20 | BICF2S2373812           | 40591244 | A | 0    | 0      | T |
| 20 | TIGRP2P274754_rs8806428 | 40605234 | 0 | 0    | 0      | G |
| 20 | BICF2P516576            | 40612140 | A | 0    | 0      | G |
| 20 | BICF2S22930719          | 40620110 | A | 0.25 | 0.2143 | G |
| 20 | BICF2P279450            | 40635275 | A | 0    | 0      | C |
| 20 | TIGRP2P274755_rs8873180 | 40646263 | A | 0    | 0      | G |
| 20 | BICF2P1268410           | 40665755 | A | 0    | 0      | G |
| 20 | BICF2P202626            | 40684372 | A | 0    | 0      | G |
| 20 | BICF2P463918            | 40687095 | A | 0    | 0      | G |
| 20 | TIGRP2P274762_rs8721971 | 40699431 | G | 0.75 | 0.7857 | A |
| 20 | BICF2P806644            | 40716051 | A | 0.5  | 0.5    | G |
| 20 | BICF2S23136393          | 40723799 | A | 0    | 0      | G |
| 20 | BICF2P1344863           | 40734831 | A | 0.25 | 0.2857 | G |
| 20 | BICF2P736330            | 40752427 | 0 | 0    | 0      | G |
| 20 | BICF2P1280203           | 40767973 | G | 0    | 0      | A |
| 20 | BICF2P829259            | 40796164 | A | 0    | 0.2143 | G |

|    |                         |          |   |      |        |   |
|----|-------------------------|----------|---|------|--------|---|
| 20 | BICF2P100301            | 40810581 | 0 | 0    | 0      | A |
| 20 | BICF2P167341            | 40835647 | 0 | 0    | 0      | C |
| 20 | BICF2P371659            | 40857187 | A | 0.25 | 0.1667 | G |
| 20 | BICF2P492693            | 40866500 | A | 0.25 | 0.2143 | G |
| 20 | BICF2P1094250           | 40880104 | G | 0    | 0      | A |
| 20 | BICF2P1451331           | 40886541 | A | 0.25 | 0.2143 | G |
| 20 | TIGRP2P274837_rs8821433 | 40916739 | 0 | 0    | 0      | C |
| 20 | BICF2P941107            | 40918366 | A | 0.5  | 0.5714 | G |
| 20 | BICF2P140757            | 40936989 | A | 0.5  | 0.5714 | C |
| 20 | BICF2P1179057           | 40947813 | A | 0    | 0      | G |
| 20 | BICF2P960900            | 40951807 | A | 0.5  | 0.5714 | G |
| 20 | BICF2P1386754           | 40965495 | A | 0.5  | 0.5    | C |
| 20 | BICF2P869855            | 40982100 | A | 0.5  | 0.5    | G |
| 20 | BICF2P1076348           | 40988701 | A | 0.5  | 0.5    | G |
| 20 | BICF2P155684            | 41000666 | G | 0.5  | 0.5    | A |
| 20 | BICF2P966298            | 41011939 | A | 0.5  | 0.5    | C |
| 20 | BICF2P885739            | 41028635 | G | 0    | 0      | A |
| 20 | BICF2P1123481           | 41035326 | A | 0.5  | 0.5    | G |
| 20 | BICF2P606220            | 41053396 | G | 0.5  | 0.5    | A |
| 20 | BICF2S23142346          | 41060846 | A | 0.5  | 0.5    | G |
| 20 | BICF2P1198302           | 41076362 | G | 0.5  | 0.5    | A |
| 20 | BICF2P212563            | 41086885 | C | 0.5  | 0.5    | A |
| 20 | BICF2P746436            | 41091549 | C | 0.5  | 0.5    | A |
| 20 | BICF2P481448            | 41101019 | G | 0.5  | 0.5    | A |
| 20 | BICF2P1504900           | 41126029 | 0 | 0    | 0      | T |
| 20 | G1103f55S89             | 41153960 | 0 | 0    | 0      | C |
| 20 | TIGRP2P274855_rs8822182 | 41180269 | 0 | 0    | 0      | G |
| 20 | BICF2P1327071           | 41184403 | G | 0    | 0      | A |
| 20 | BICF2P1061968           | 41202527 | 0 | 0    | 0      | G |
| 20 | BICF2P1314689           | 41215117 | C | 0.25 | 0.2143 | A |
| 20 | BICF2P914653            | 41217592 | G | 0.25 | 0.2143 | A |
| 20 | BICF2P408113            | 41229381 | A | 0.25 | 0.2143 | C |
| 20 | BICF2P116133            | 41241178 | A | 0.25 | 0.2143 | G |
| 20 | TIGRP2P274857_rs9154701 | 41261415 | 0 | 0    | 0      | G |
| 20 | TIGRP2P274858_rs8986094 | 41271157 | 0 | 0    | 0      | C |
| 20 | BICF2P1045090           | 41278251 | 0 | 0    | 0      | C |
| 20 | BICF2P471574            | 41291981 | A | 0.25 | 0.2143 | G |
| 20 | BICF2S23114565          | 41304489 | G | 0.25 | 0.2143 | A |
| 20 | BICF2P509577            | 41310875 | A | 0.25 | 0.2143 | C |
| 20 | BICF2P735611            | 41327714 | A | 0.25 | 0.2143 | G |
| 20 | BICF2P1224909           | 41337123 | A | 0.25 | 0.2143 | G |
| 20 | BICF2P413074            | 41345712 | G | 0.25 | 0.2143 | A |
| 20 | TIGRP2P274861_rs8594298 | 41358507 | 0 | 0    | 0      | G |
| 20 | BICF2P626859            | 41365616 | G | 0.25 | 0.2143 | A |
| 20 | BICF2P968727            | 41387018 | G | 0.25 | 0.2143 | A |
| 20 | BICF2P1139808           | 41395277 | G | 0.25 | 0.2143 | A |
| 20 | BICF2P1342476           | 41411067 | G | 0.25 | 0.2143 | A |

|    |                         |          |   |      |        |   |
|----|-------------------------|----------|---|------|--------|---|
| 20 | BICF2P769104            | 41422308 | G | 0.25 | 0.2143 | A |
| 20 | BICF2P648601            | 41424761 | G | 0.25 | 0.2143 | A |
| 20 | BICF2P789266            | 41454760 | G | 0.25 | 0.2143 | A |
| 20 | BICF2P549               | 41466952 | A | 0.25 | 0.2143 | G |
| 20 | BICF2P211362            | 41478105 | 0 | 0    | 0      | A |
| 20 | BICF2P257870            | 41488878 | G | 0.25 | 0.2143 | A |
| 20 | BICF2S23351441          | 41493229 | C | 0.25 | 0.1667 | A |
| 20 | BICF2P247134            | 41510258 | A | 0    | 0      | G |
| 20 | BICF2P327134            | 41516957 | C | 0.5  | 0.5    | A |
| 20 | BICF2P438722            | 41533143 | 0 | 0    | 0      | C |
| 20 | BICF2P1507956           | 41561568 | 0 | 0    | 0      | A |
| 20 | BICF2P20683             | 41576457 | A | 0.25 | 0.2143 | G |
| 20 | BICF2P360884            | 41586182 | G | 0.25 | 0.1667 | A |
| 20 | BICF2P1163972           | 41618769 | A | 0.25 | 0.2143 | C |
| 20 | BICF2P983977            | 41642791 | G | 0.25 | 0.1667 | A |
| 20 | BICF2P687775            | 41662902 | G | 0.25 | 0.2143 | A |
| 20 | BICF2P1517463           | 41697094 | C | 0.25 | 0.2143 | G |
| 20 | BICF2P453555            | 41709258 | G | 0.25 | 0.2857 | A |
| 20 | BICF2P508868            | 41723260 | 0 | 0    | 0      | C |
| 20 | BICF2P372450            | 41734129 | A | 0.25 | 0.2857 | G |
| 20 | BICF2P271393            | 41745091 | G | 0.25 | 0.2857 | A |
| 20 | G1104f50S319            | 41766457 | A | 0    | 0      | G |
| 20 | BICF2P101177            | 41788275 | 0 | 0    | 0      | C |
| 20 | TIGRP2P274899_rs8858315 | 41795286 | 0 | 0    | 0      | G |
| 20 | BICF2P390223            | 41799616 | G | 0.5  | 0.5    | A |
| 20 | BICF2P227217            | 41804539 | G | 0.5  | 0.5    | A |
| 20 | BICF2P108581            | 41819173 | A | 0.75 | 0.7857 | G |
| 20 | BICF2P131674            | 41839718 | 0 | 0    | 0      | G |
| 20 | TIGRP2P274900_rs8710323 | 41849242 | 0 | 0    | 0      | C |
| 20 | BICF2S23226002          | 41890499 | G | 0    | 0      | A |
| 20 | BICF2P716239            | 41900414 | 0 | 0    | 0      | G |
| 20 | BICF2P854185            | 41916205 | G | 0.25 | 0.2143 | A |
| 20 | BICF2P304809            | 41924733 | A | 0.25 | 0.2857 | G |
| 20 | BICF2P1310301           | 41927031 | A | 0.25 | 0.2857 | G |
| 20 | BICF2P1310305           | 41930509 | A | 0.25 | 0.2857 | G |
| 20 | BICF2P293885            | 41943779 | 0 | 0    | 0      | G |
| 20 | BICF2P1231294           | 41951828 | G | 0.25 | 0.2857 | A |
| 20 | BICF2P541405            | 41954052 | A | 0.25 | 0.2857 | C |
| 20 | BICF2P268311            | 41970749 | 0 | 0    | 0      | G |
| 20 | BICF2P112281            | 41991115 | G | 0.25 | 0.2857 | A |
| 20 | BICF2P1185290           | 42004062 | A | 0.25 | 0.2857 | G |
| 20 | BICF2P965866            | 42018269 | 0 | 0    | 0      | G |
| 20 | BICF2P692789            | 42025726 | A | 0    | 0      | G |
| 20 | BICF2P1347875           | 42033988 | 0 | 0    | 0      | G |
| 20 | TIGRP2P274909_rs8999088 | 42046904 | 0 | 0    | 0      | A |
| 20 | TIGRP2P274911_rs9188750 | 42063584 | A | 0    | 0      | G |
| 20 | BICF2S23160763          | 42071038 | G | 0.25 | 0.2143 | A |

|    |                         |          |   |      |        |   |
|----|-------------------------|----------|---|------|--------|---|
| 20 | BICF2P611903            | 42083608 | G | 0    | 0      | C |
| 20 | BICF2P250980            | 42095538 | A | 0.25 | 0.2143 | G |
| 20 | BICF2P167608            | 42102754 | C | 0    | 0      | A |
| 20 | BICF2P1241961           | 42114184 | A | 0    | 0      | G |
| 20 | BICF2P823469            | 42137935 | 0 | 0    | 0      | G |
| 20 | BICF2P134412            | 42151061 | G | 0    | 0      | A |
| 20 | BICF2P779510            | 42228102 | 0 | 0    | 0      | G |
| 20 | BICF2P513695            | 42251978 | 0 | 0    | 0      | A |
| 20 | BICF2P1191632           | 42272764 | G | 0    | 0      | A |
| 20 | BICF2S23613439          | 42300053 | 0 | 0    | 0      | A |
| 20 | BICF2P927225            | 42375806 | A | 0.25 | 0.2857 | G |
| 20 | TIGRP2P274941_rs9176409 | 42386452 | A | 0.25 | 0.2857 | G |
| 20 | BICF2P300770            | 42393595 | 0 | 0    | 0      | G |
| 20 | BICF2P476394            | 42406453 | G | 0    | 0      | A |
| 20 | BICF2P1173489           | 42415710 | A | 0    | 0      | G |
| 20 | BICF2S23524186          | 42460132 | G | 0.25 | 0.2857 | A |
| 20 | BICF2P458881            | 42477560 | G | 0.5  | 0.5714 | A |
| 20 | BICF2P861824            | 42483020 | G | 0.5  | 0.5714 | A |
| 20 | BICF2P1454114           | 42497341 | A | 0.25 | 0.2857 | G |
| 20 | BICF2P5574              | 42524987 | 0 | 0    | 0      | A |
| 20 | BICF2P713712            | 42529494 | 0 | 0    | 0      | G |
| 20 | BICF2S22934685          | 42547825 | G | 0.5  | 0.5    | A |
| 20 | BICF2S23249360          | 42556766 | A | 0.5  | 0.5    | C |
| 20 | BICF2P1206846           | 42567114 | 0 | 0    | 0      | G |
| 20 | BICF2P1126141           | 42579727 | A | 0.5  | 0.5    | G |
| 20 | BICF2S2295117           | 42587791 | G | 0.25 | 0.2857 | A |
| 20 | BICF2P909297            | 42599640 | A | 0.25 | 0.2857 | C |
| 20 | BICF2P809466            | 42611083 | A | 0.5  | 0.5    | G |
| 20 | BICF2P877702            | 42619804 | A | 0.5  | 0.5    | C |
| 20 | BICF2P1312482           | 42638485 | 0 | 0    | 0      | G |
| 20 | BICF2S23649917          | 42657818 | A | 0.75 | 0.7857 | T |
| 20 | BICF2P1247343           | 42687139 | A | 0.25 | 0.2857 | C |
| 20 | BICF2P1386548           | 42698689 | G | 0.5  | 0.5    | A |
| 20 | BICF2P1242016           | 42700510 | A | 0.25 | 0.2857 | T |
| 20 | BICF2P197236            | 42721964 | A | 0.25 | 0.2857 | C |
| 20 | BICF2P371328            | 42726451 | A | 0.25 | 0.2857 | G |
| 20 | BICF2S23623660          | 42743234 | A | 0.25 | 0.2857 | C |
| 20 | BICF2S231413            | 42749301 | C | 0.25 | 0.2143 | A |
| 20 | BICF2P1207215           | 42768330 | A | 0.25 | 0.2857 | G |
| 20 | BICF2P1334920           | 42780600 | G | 0.75 | 0.7857 | A |
| 20 | BICF2P461405            | 42789278 | A | 0.5  | 0.5    | C |
| 20 | BICF2S23637583          | 42811791 | G | 0.5  | 0.5    | A |
| 20 | BICF2P870689            | 42815574 | A | 0.5  | 0.5    | C |
| 20 | BICF2S23610176          | 42828138 | G | 0.25 | 0.2143 | A |
| 20 | BICF2S22927213          | 42853597 | A | 0.25 | 0.2143 | G |
| 20 | BICF2S233675            | 42901087 | A | 0.5  | 0.5    | G |
| 20 | BICF2P136231            | 42925412 | 0 | 0    | 0      | A |

|    |                         |          |   |      |        |   |
|----|-------------------------|----------|---|------|--------|---|
| 20 | BICF2S23139889          | 42936673 | A | 0.25 | 0.2143 | G |
| 20 | BICF2P656368            | 42949798 | A | 0.5  | 0.5    | G |
| 20 | BICF2P1444805           | 42957449 | G | 0.75 | 0.7143 | A |
| 20 | BICF2S2305218           | 42975776 | A | 0.25 | 0.2143 | G |
| 20 | BICF2S23324924          | 42988068 | G | 0.25 | 0.2143 | A |
| 20 | BICF2S23648721          | 43026537 | 0 | 0    | 0      | C |
| 20 | BICF2S23313657          | 43061232 | A | 0.5  | 0.5    | G |
| 20 | BICF2P170353            | 43073389 | A | 0.5  | 0.5    | G |
| 20 | BICF2P1244395           | 43084515 | A | 0    | 0      | G |
| 20 | BICF2G630448460         | 43099377 | 0 | 0    | 0      | G |
| 20 | BICF2P851871            | 43106978 | A | 0    | 0      | G |
| 20 | TIGRP2P274967_rs9085005 | 43114401 | 0 | 0    | 0      | G |
| 20 | BICF2P640854            | 43132940 | A | 0.5  | 0.5    | G |
| 20 | BICF2P846660            | 43137186 | A | 1    | 1      | G |
| 20 | BICF2P497321            | 43151871 | A | 0    | 0      | G |
| 20 | BICF2P546632            | 43172174 | G | 0.25 | 0.2857 | A |
| 20 | BICF2P748791            | 43186867 | C | 0    | 0      | G |
| 20 | BICF2P995460            | 43200676 | G | 0.75 | 0.75   | A |
| 20 | BICF2P1014939           | 43214543 | G | 0.25 | 0.2143 | A |
| 20 | BICF2P391869            | 43221438 | G | 0    | 0      | A |
| 20 | BICF2P1300647           | 43239131 | A | 0    | 0      | G |
| 20 | BICF2S2305858           | 43246421 | G | 0    | 0      | C |
| 20 | BICF2P1090604           | 43258057 | A | 0.25 | 0.2857 | G |
| 20 | BICF2P57190             | 43268753 | A | 0.5  | 0.5714 | G |
| 20 | BICF2P57185             | 43269695 | 0 | 0    | 0      | G |
| 20 | BICF2P81511             | 43275370 | G | 0.75 | 0.7857 | A |
| 20 | BICF2S23659137          | 43293222 | G | 0.75 | 0.7857 | A |
| 20 | G1107f26S125            | 43320878 | A | 0.25 | 0.2857 | G |
| 20 | TIGRP2P274972_rs9211362 | 43335714 | 0 | 0    | 0      | A |
| 20 | BICF2S23052463          | 43346551 | T | 0.75 | 0.7857 | A |
| 20 | BICF2S23052464          | 43346568 | G | 0.25 | 0.2143 | A |
| 20 | BICF2P1217472           | 43379574 | 0 | 0    | 0      | A |
| 20 | BICF2P580323            | 43394901 | 0 | 0    | 0      | G |
| 20 | BICF2S23733801          | 43443010 | A | 0    | 0      | G |
| 20 | BICF2P281080            | 43455874 | 0 | 0    | 0      | A |
| 20 | BICF2P966647            | 43470451 | 0 | 0    | 0      | G |
| 20 | BICF2P537151            | 43481852 | G | 0.25 | 0.2143 | A |
| 20 | BICF2S23021033          | 43499273 | G | 0    | 0      | A |
| 20 | BICF2G630448456         | 43508869 | A | 0.25 | 0.2857 | G |
| 20 | BICF2G630448442         | 43517069 | A | 0.25 | 0.2857 | G |
| 20 | BICF2G630448433         | 43530244 | A | 0.25 | 0.2857 | G |
| 20 | BICF2G630448426         | 43533017 | G | 0.25 | 0.2857 | A |
| 20 | BICF2S23162477          | 43538788 | A | 0.25 | 0.2857 | G |
| 20 | BICF2G630448418         | 43547107 | G | 0.25 | 0.2857 | A |
| 20 | BICF2G630448415         | 43553594 | 0 | 0    | 0      | G |
| 20 | BICF2S23146429          | 43583845 | A | 0.25 | 0.2857 | G |
| 20 | BICF2P256469            | 43595498 | 0 | 0    | 0      | C |

|    |                |          |   |      |        |   |
|----|----------------|----------|---|------|--------|---|
| 20 | G1109f27S263   | 43618330 | 0 | 0    | 0      | C |
| 20 | BICF2S23145203 | 43641891 | C | 0.75 | 0.7857 | G |
| 20 | BICF2P1331315  | 43652850 | 0 | 0    | 0      | G |
| 20 | BICF2P523528   | 43673160 | 0 | 0    | 0      | C |
| 20 | BICF2S23741150 | 43685107 | G | 0    | 0.2143 | A |
| 20 | BICF2P773391   | 43694121 | A | 0    | 0      | G |
| 20 | BICF2S23042441 | 43709065 | A | 0.25 | 0.2143 | G |
| 20 | BICF2P1256998  | 43762559 | C | 0.25 | 0.2143 | A |
| 20 | BICF2P827648   | 43779282 | G | 1    | 1      | A |
| 20 | BICF2P713484   | 43788799 | G | 0    | 0      | A |
| 20 | BICF2P840764   | 43794710 | A | 0    | 0      | C |
| 20 | BICF2P1189688  | 43805514 | A | 0    | 0      | G |
| 20 | BICF2P1505501  | 43824620 | G | 0.25 | 0.3    | A |
| 20 | BICF2P1070872  | 43831444 | G | 0.25 | 0.2143 | A |
| 20 | BICF2P830721   | 43848341 | A | 0    | 0      | G |
| 20 | BICF2S23047159 | 43863713 | G | 0    | 0      | A |
| 20 | BICF2P120986   | 43897240 | 0 | 0    | 0      | G |
| 20 | BICF2P825563   | 43915193 | 0 | 0    | 0      | A |
| 20 | BICF2S23334554 | 43935688 | A | 0.25 | 0.2143 | G |
| 20 | BICF2S23158681 | 43941778 | A | 0.25 | 0.2143 | G |
| 20 | BICF2P478832   | 43966255 | 0 | 0    | 0      | G |
| 20 | BICF2P205053   | 43994251 | 0 | 0    | 0      | A |
| 20 | BICF2S23763114 | 44001043 | G | 0    | 0      | A |
| 20 | BICF2S22952333 | 44027026 | A | 0.25 | 0.2143 | G |
| 20 | BICF2P240605   | 44061104 | 0 | 0    | 0      | G |
| 20 | BICF2P1129121  | 44083101 | 0 | 0    | 0      | A |
| 20 | BICF2S22931382 | 44097048 | G | 0.5  | 0.5    | A |
| 20 | BICF2S23216159 | 44105651 | A | 0    | 0      | G |
| 20 | BICF2S23343399 | 44122748 | G | 0.25 | 0.2143 | A |
| 20 | BICF2S23212666 | 44128697 | A | 0.25 | 0.2143 | G |
| 20 | BICF2P525072   | 44146976 | 0 | 0    | 0      | A |
| 20 | BICF2S23152344 | 44167432 | G | 0    | 0      | A |
| 20 | BICF2P1333399  | 44182956 | 0 | 0    | 0      | G |
| 20 | BICF2S22923756 | 44198701 | G | 0.25 | 0.2143 | A |
| 20 | BICF2P697133   | 44226706 | 0 | 0    | 0      | G |
| 20 | BICF2S23726023 | 44246884 | A | 0    | 0      | G |
| 20 | BICF2S2397689  | 44280788 | A | 0    | 0      | G |
| 20 | BICF2P552603   | 44294713 | 0 | 0    | 0      | G |
| 20 | BICF2S23150491 | 44312048 | G | 0    | 0      | A |
| 20 | BICF2S23748153 | 44331745 | A | 0    | 0      | G |
| 20 | BICF2P493330   | 44334346 | 0 | 0    | 0      | A |
| 20 | BICF2S23415717 | 44354720 | G | 0.5  | 0.4286 | A |
| 20 | BICF2P21054    | 44373148 | 0 | 0    | 0      | G |
| 20 | BICF2P1394766  | 44400207 | G | 0.25 | 0.2857 | A |
| 20 | G1111f23S75    | 44421872 | G | 0    | 0      | A |
| 20 | BICF2P300813   | 44453613 | 0 | 0    | 0      | G |
| 20 | BICF2P148086   | 44473374 | G | 0    | 0      | C |

|    |                         |          |   |      |        |   |
|----|-------------------------|----------|---|------|--------|---|
| 20 | TIGRP2P274996_rs8972025 | 44485087 | 0 | 0    | 0      | G |
| 20 | BICF2P116888            | 44510064 | 0 | 0    | 0      | G |
| 20 | BICF2S23652066          | 44533945 | 0 | 0    | 0      | A |
| 20 | BICF2P503572            | 44558349 | 0 | 0    | 0      | A |
| 20 | G1112f58S90             | 44592019 | 0 | 0    | 0      | C |
| 20 | BICF2P1258561           | 44628844 | 0 | 0    | 0      | A |
| 20 | TIGRP2P275003_rs8566309 | 44656775 | 0 | 0    | 0      | A |
| 20 | BICF2P712446            | 44671609 | A | 0    | 0      | T |
| 20 | BICF2S23416488          | 44705401 | G | 0.75 | 0.7857 | A |
| 20 | BICF2S23454432          | 44715188 | A | 0.25 | 0.2143 | G |
| 20 | BICF2P529303            | 44726070 | 0 | 0    | 0      | A |
| 20 | BICF2P180129            | 44738837 | A | 0    | 0      | G |
| 20 | BICF2P823222            | 44751161 | 0 | 0    | 0      | A |
| 20 | BICF2P487799            | 44761664 | 0 | 0    | 0      | G |
| 20 | BICF2S2363619           | 44783345 | A | 0.25 | 0.2143 | G |
| 20 | BICF2S2326676           | 44796822 | G | 0.75 | 0.7857 | A |
| 20 | BICF2P204950            | 44808812 | 0 | 0    | 0      | C |
| 20 | BICF2P1260773           | 44817163 | 0 | 0    | 0      | G |
| 20 | BICF2P861196            | 44849564 | A | 0.25 | 0.2857 | G |
| 20 | BICF2P161292            | 44853547 | 0 | 0    | 0      | G |
| 20 | BICF2P143599            | 44866573 | A | 0    | 0      | G |
| 20 | BICF2P741124            | 44902271 | A | 0    | 0      | G |
| 20 | BICF2P208188            | 44926544 | 0 | 0    | 0      | C |
| 20 | BICF2S23713080          | 44941862 | A | 0.5  | 0.5    | C |
| 20 | BICF2S23340206          | 44955843 | C | 0.5  | 0.5    | A |
| 20 | BICF2P191641            | 44971366 | A | 1    | 1      | G |
| 20 | BICF2S23525205          | 44981423 | A | 0    | 0      | G |
| 20 | BICF2P827688            | 44991966 | A | 0.5  | 0.5    | G |
| 20 | BICF2P1381335           | 45004471 | A | 0.5  | 0.5    | G |
| 20 | BICF2P441875            | 45013670 | G | 0    | 0      | A |
| 20 | BICF2P815708            | 45023853 | 0 | 0    | 0      | A |
| 20 | BICF2P1067682           | 45041072 | G | 0    | 0      | A |
| 20 | BICF2P801003            | 45055276 | A | 0.75 | 0.7143 | G |
| 20 | BICF2P801006            | 45057717 | A | 0.75 | 0.7143 | C |
| 20 | BICF2P1267645           | 45073020 | G | 0    | 0      | A |
| 20 | BICF2P957092            | 45079674 | A | 0.75 | 0.7143 | G |
| 20 | BICF2P968086            | 45082122 | G | 0.75 | 0.7143 | A |
| 20 | BICF2P301950            | 45095613 | A | 0.5  | 0.5    | G |
| 20 | BICF2P1392250           | 45105901 | A | 0    | 0      | G |
| 20 | BICF2P505754            | 45125123 | A | 0.75 | 0.7857 | T |
| 20 | BICF2P516049            | 45135484 | G | 0.75 | 0.7857 | A |
| 20 | BICF2P715932            | 45141420 | A | 0.75 | 0.7857 | G |
| 20 | BICF2S23528617          | 45154941 | A | 0    | 0      | G |
| 20 | BICF2P876493            | 45166677 | A | 0.5  | 0.5    | G |
| 20 | BICF2P875778            | 45178454 | A | 0    | 0      | G |
| 20 | BICF2P1266190           | 45186896 | A | 0.75 | 0.7857 | G |
| 20 | BICF2P1211484           | 45214842 | G | 1    | 1      | C |

|    |                         |          |   |      |        |   |
|----|-------------------------|----------|---|------|--------|---|
| 20 | BICF2P1142955           | 45228618 | A | 0.75 | 0.7857 | G |
| 20 | BICF2P755697            | 45239739 | A | 1    | 1      | C |
| 20 | BICF2P1206755           | 45243043 | A | 1    | 1      | G |
| 20 | BICF2P967211            | 45252501 | A | 0    | 0      | C |
| 20 | BICF2S23642825          | 45282074 | G | 0    | 0      | A |
| 20 | BICF2P142116            | 45290850 | G | 0    | 0      | A |
| 20 | BICF2P1179081           | 45301965 | T | 0    | 0      | A |
| 20 | BICF2P608559            | 45311886 | A | 0    | 0      | G |
| 20 | BICF2P782456            | 45327022 | G | 1    | 1      | A |
| 20 | BICF2P911789            | 45335884 | A | 1    | 1      | G |
| 20 | BICF2P926434            | 45355933 | A | 0    | 0      | G |
| 20 | BICF2P299210            | 45359331 | C | 0    | 0      | A |
| 20 | TIGRP2P275018_rs9222615 | 45377547 | 0 | 0    | 0      | G |
| 20 | BICF2P1175332           | 45383337 | A | 0.75 | 0.7857 | G |
| 20 | BICF2P968659            | 45401755 | A | 0.75 | 0.7857 | G |
| 20 | BICF2S22918306          | 45402481 | A | 0.25 | 0.2143 | G |
| 20 | BICF2S22962344          | 45424907 | A | 0    | 0      | G |
| 20 | BICF2P452532            | 45439804 | 0 | 0    | 0      | A |
| 20 | BICF2S233350            | 45467889 | A | 0.25 | 0.2143 | G |
| 20 | BICF2P1175361           | 45473588 | C | 0.25 | 0.2143 | A |
| 20 | BICF2P1460502           | 45492675 | A | 0.75 | 0.7857 | G |
| 20 | BICF2P42848             | 45504389 | 0 | 0    | 0      | C |
| 20 | BICF2S23710793          | 45523461 | G | 1    | 1      | A |
| 20 | BICF2P921104            | 45535898 | G | 1    | 1      | A |
| 20 | BICF2P474075            | 45547322 | G | 0.75 | 0.7857 | A |
| 20 | BICF2P1100219           | 45555190 | A | 0    | 0      | G |
| 20 | BICF2P1268709           | 45559963 | G | 0.75 | 0.7857 | A |
| 20 | BICF2P1078200           | 45564502 | A | 0.75 | 0.7857 | G |
| 20 | BICF2P891849            | 45576303 | G | 0.25 | 0.2143 | A |
| 20 | BICF2P1147841           | 45586399 | A | 0.25 | 0.2143 | G |
| 20 | BICF2P1080309           | 45606877 | G | 0.75 | 0.7857 | A |
| 20 | BICF2P940436            | 45612939 | G | 0    | 0      | A |
| 20 | BICF2P728963            | 45622457 | A | 0    | 0      | C |
| 20 | BICF2S23413507          | 45638263 | G | 0    | 0      | A |
| 20 | BICF2S23321760          | 45659118 | G | 1    | 1      | C |
| 20 | BICF2P936513            | 45673608 | G | 0    | 0      | A |
| 20 | BICF2P186258            | 45693884 | G | 1    | 1      | A |
| 20 | BICF2P193872            | 45704079 | G | 1    | 1      | A |
| 20 | BICF2S23317374          | 45714803 | A | 1    | 1      | G |
| 20 | BICF2S23236440          | 45734965 | G | 0.25 | 0.2143 | A |
| 20 | BICF2S23234494          | 45738908 | A | 0    | 0      | G |
| 20 | BICF2P838491            | 45754334 | A | 0.75 | 0.7857 | G |
| 20 | BICF2S23545652          | 45772647 | 0 | 0    | 0      | A |
| 20 | BICF2P241618            | 45784028 | 0 | 0    | 0      | A |
| 20 | BICF2P1260313           | 45800163 | A | 1    | 1      | G |
| 20 | BICF2P889809            | 45813591 | A | 0    | 0      | C |
| 20 | BICF2P89399             | 45820420 | C | 0    | 0      | A |



|    |                         |          |   |      |        |   |
|----|-------------------------|----------|---|------|--------|---|
| 20 | BICF2S22951929          | 45846622 | C | 1    | 1      | G |
| 20 | BICF2S22964166          | 45847350 | G | 0    | 0      | A |
| 20 | BICF2P475284            | 45851477 | A | 1    | 1      | G |
| 20 | BICF2P785185            | 45870779 | G | 0.5  | 0.4286 | A |
| 20 | BICF2P787754            | 45878176 | G | 0.5  | 0.5714 | A |
| 20 | BICF2P142751            | 45885458 | C | 0.5  | 0.5714 | G |
| 20 | BICF2S23639521          | 45889378 | A | 0    | 0      | G |
| 20 | BICF2S23454228          | 45900558 | A | 0    | 0      | G |
| 20 | BICF2S23142501          | 45912763 | A | 0    | 0      | G |
| 20 | BICF2S22911497          | 45922768 | A | 0    | 0      | G |
| 20 | BICF2P754310            | 45934931 | A | 0    | 0      | T |
| 20 | BICF2S23123229          | 45944339 | G | 0    | 0      | A |
| 20 | BICF2S2354104           | 45958970 | A | 0    | 0      | G |
| 20 | BICF2S23152487          | 45970021 | A | 0    | 0      | G |
| 20 | BICF2P368684            | 45985751 | A | 0    | 0      | G |
| 20 | BICF2P1265247           | 45988747 | A | 0    | 0      | G |
| 20 | BICF2S23013439          | 46003484 | G | 0    | 0      | A |
| 20 | BICF2P707927            | 46015603 | A | 0    | 0      | G |
| 20 | BICF2P1048447           | 46021010 | G | 0    | 0      | A |
| 20 | BICF2P540051            | 46026849 | A | 0    | 0      | C |
| 20 | BICF2P889819            | 46038333 | G | 0    | 0      | A |
| 20 | BICF2P395185            | 46055411 | G | 0    | 0      | A |
| 20 | BICF2P1294455           | 46059692 | 0 | 0    | 0      | C |
| 20 | BICF2P754139            | 46075129 | 0 | 0    | 0      | A |
| 20 | BICF2P625040            | 46086218 | 0 | 0    | 0      | A |
| 20 | BICF2P1176700           | 46092606 | G | 1    | 1      | A |
| 20 | BICF2S23126427          | 46111603 | G | 0    | 0      | A |
| 20 | BICF2P201368            | 46116674 | A | 0    | 0      | G |
| 20 | BICF2S22914963          | 46131469 | A | 0    | 0      | G |
| 20 | BICF2P817735            | 46140814 | A | 0    | 0      | G |
| 20 | TIGRP2P275029_rs8652841 | 46153438 | 0 | 0    | 0      | G |
| 20 | BICF2S23726694          | 46161416 | G | 0.25 | 0.2143 | A |
| 20 | BICF2P696014            | 46174459 | T | 0.25 | 0.2143 | A |
| 20 | BICF2P81421             | 46187197 | A | 0.25 | 0.2143 | G |
| 20 | BICF2S23725316          | 46197200 | A | 0.75 | 0.7857 | G |
| 20 | TIGRP2P275030_rs9215133 | 46211132 | 0 | 0    | 0      | A |
| 20 | BICF2S2311891           | 46225404 | G | 0.75 | 0.7143 | A |
| 20 | BICF2P716231            | 46238879 | A | 0    | 0      | C |
| 20 | BICF2P240453            | 46243570 | A | 0.5  | 0.5714 | G |
| 20 | BICF2P1090862           | 46255043 | G | 0.5  | 0.5714 | A |
| 20 | BICF2P1090861           | 46255235 | G | 0.5  | 0.5714 | A |
| 20 | BICF2P517956            | 46268828 | G | 0.5  | 0.5714 | A |
| 20 | BICF2P706912            | 46278139 | G | 0.5  | 0.5714 | A |
| 20 | BICF2P1128477           | 46290523 | A | 0    | 0      | G |
| 20 | BICF2S23118142          | 46300537 | G | 0.75 | 0.7857 | A |
| 20 | BICF2P153879            | 46327755 | 0 | 0    | 0      | G |
| 20 | BICF2S23056251          | 46343056 | A | 0    | 0      | G |

|    |                         |          |   |      |        |   |
|----|-------------------------|----------|---|------|--------|---|
| 20 | BICF2S23516453          | 46348679 | C | 0.25 | 0.2143 | A |
| 20 | BICF2S2411367           | 46367754 | A | 0.25 | 0.2143 | G |
| 20 | BICF2P342099            | 46374373 | 0 | 0    | 0      | G |
| 20 | BICF2P899110            | 46394027 | A | 0    | 0      | G |
| 20 | BICF2S23622186          | 46406692 | C | 0.25 | 0.2143 | A |
| 20 | BICF2P151728            | 46414275 | G | 0    | 0      | A |
| 20 | BICF2S23632909          | 46432086 | A | 0.25 | 0.4    | G |
| 20 | BICF2P1317092           | 46438016 | A | 0.25 | 0.2143 | G |
| 20 | BICF2P294403            | 46448776 | A | 0.25 | 0.2143 | G |
| 20 | BICF2S23028625          | 46462247 | G | 0.25 | 0.2143 | A |
| 20 | BICF2P1311124           | 46472294 | A | 0.25 | 0.2143 | G |
| 20 | TIGRP2P275039_rs8824216 | 46490514 | 0 | 0    | 0      | A |
| 20 | BICF2P654471            | 46499758 | G | 0.25 | 0.2143 | A |
| 20 | BICF2S23029787          | 46507180 | G | 0.25 | 0.2143 | A |
| 20 | BICF2P518316            | 46537642 | C | 0.25 | 0.2143 | A |
| 20 | BICF2P543637            | 46570835 | A | 0.25 | 0.2143 | G |
| 20 | BICF2P410835            | 46575290 | A | 0.25 | 0.2143 | G |
| 20 | BICF2P410834            | 46575321 | G | 0.25 | 0.2143 | A |
| 20 | BICF2P515331            | 46586368 | A | 0.25 | 0.2143 | G |
| 20 | BICF2S2397814           | 46596719 | A | 0.25 | 0.2143 | G |
| 20 | BICF2P1445357           | 46604376 | G | 0.5  | 0.4286 | A |
| 20 | BICF2S2295815           | 46617692 | A | 0.5  | 0.4286 | G |
| 20 | BICF2P1095699           | 46629630 | A | 0.5  | 0.4286 | G |
| 20 | BICF2P1129648           | 46636667 | C | 0.5  | 0.4286 | A |
| 20 | BICF2P908732            | 46645750 | A | 0.5  | 0.4286 | G |
| 20 | BICF2P195248            | 46661314 | A | 0.25 | 0.2143 | G |
| 20 | BICF2P1378004           | 46674924 | C | 0.25 | 0.2143 | A |
| 20 | BICF2P437062            | 46683705 | G | 0.25 | 0.2143 | A |
| 20 | BICF2P767967            | 46687464 | G | 0.25 | 0.2143 | A |
| 20 | BICF2P1069772           | 46690962 | A | 0.25 | 0.2143 | G |
| 20 | BICF2S23121952          | 46706734 | G | 0.25 | 0.2143 | A |
| 20 | BICF2S236547            | 46720507 | G | 0.5  | 0.4286 | A |
| 20 | BICF2P1345034           | 46741045 | 0 | 0    | 0      | G |
| 20 | BICF2P1252953           | 46753672 | 0 | 0    | 0      | G |
| 20 | BICF2P206011            | 46782185 | 0 | 0    | 0      | A |
| 20 | BICF2P264957            | 46797257 | 0 | 0    | 0      | C |
| 20 | G1113f42S23             | 46820316 | A | 0    | 0      | G |
| 20 | BICF2P1283050           | 46842746 | 0 | 0    | 0      | G |
| 20 | BICF2S23622744          | 46863120 | A | 0    | 0      | C |
| 20 | BICF2P516998            | 46882535 | 0 | 0    | 0      | G |
| 20 | BICF2P962820            | 46888620 | 0 | 0    | 0      | G |
| 20 | BICF2S23650091          | 46900963 | G | 0.25 | 0.2143 | A |
| 20 | BICF2P102333            | 46915340 | 0 | 0    | 0      | G |
| 20 | BICF2P486563            | 46931390 | 0 | 0    | 0      | C |
| 20 | BICF2S23154100          | 46933675 | A | 0    | 0      | G |
| 20 | BICF2S23449078          | 46959950 | A | 0.25 | 0.2143 | C |
| 20 | BICF2P1297163           | 46982431 | 0 | 0    | 0      | C |

|    |                         |          |   |      |        |   |
|----|-------------------------|----------|---|------|--------|---|
| 20 | TIGRP2P275061_rs9168160 | 46995480 | 0 | 0    | 0      | G |
| 20 | BICF2S23752202          | 47034247 | A | 0.25 | 0.2143 | G |
| 20 | BICF2S23427242          | 47068232 | G | 0.5  | 0.5714 | A |
| 20 | BICF2S2366420           | 47069961 | 0 | 0    | 0      | A |
| 20 | BICF2P515050            | 47086690 | 0 | 0    | 0      | C |
| 20 | BICF2P642792            | 47098839 | 0 | 0    | 0      | C |
| 20 | BICF2S2364142           | 47136539 | A | 0.25 | 0.2143 | C |
| 20 | BICF2S23614009          | 47140620 | G | 0.25 | 0.2143 | A |
| 20 | BICF2P935686            | 47179641 | 0 | 0    | 0      | C |
| 20 | BICF2S23034045          | 47191491 | A | 0.25 | 0.2143 | G |
| 20 | BICF2P903672            | 47196000 | 0 | 0    | 0      | G |
| 20 | BICF2S23631135          | 47207914 | A | 0.25 | 0.2143 | C |
| 20 | BICF2P218215            | 47238484 | 0 | 0    | 0      | A |
| 20 | BICF2S22912997          | 47249067 | A | 0.5  | 0.4286 | G |
| 20 | TIGRP2P275077_rs8843552 | 47305068 | 0 | 0    | 0      | C |
| 20 | BICF2P914808            | 47320642 | 0 | 0    | 0      | G |
| 20 | BICF2P1245667           | 47331374 | 0 | 0    | 0      | G |
| 20 | BICF2P789205            | 47349654 | 0 | 0    | 0      | A |
| 20 | BICF2P321534            | 47396690 | 0 | 0    | 0      | C |
| 20 | BICF2P151460            | 47411253 | 0 | 0    | 0      | C |
| 20 | BICF2P263860            | 47429458 | 0 | 0    | 0      | G |
| 20 | G1115f33S272            | 47454083 | C | 0.5  | 0.5714 | A |
| 20 | BICF2P320310            | 47477917 | 0 | 0    | 0      | A |
| 20 | BICF2P1441891           | 47487076 | 0 | 0    | 0      | A |
| 20 | BICF2P30185             | 47504071 | 0 | 0    | 0      | A |
| 20 | BICF2P1302291           | 47509144 | A | 0.75 | 0.7857 | C |
| 20 | BICF2P1144529           | 47520654 | G | 0.5  | 0.5714 | A |
| 20 | BICF2P787087            | 47551706 | G | 0.5  | 0.5714 | A |
| 20 | BICF2P1199821           | 47560975 | A | 0.75 | 0.7857 | T |
| 20 | TIGRP2P275081_rs9211987 | 47567345 | 0 | 0    | 0      | T |
| 20 | BICF2P1429562           | 47585373 | A | 0.5  | 0.5714 | G |
| 20 | BICF2P1429559           | 47588306 | T | 0.5  | 0.5714 | A |
| 20 | BICF2P1313482           | 47607715 | G | 0.5  | 0.5714 | A |
| 20 | BICF2S23728764          | 47615500 | T | 0    | 0      | A |
| 20 | BICF2P1193292           | 47623579 | A | 0.25 | 0.2143 | C |
| 20 | BICF2P494127            | 47636037 | G | 0.75 | 0.7857 | C |
| 20 | BICF2S23021856          | 47640114 | A | 0    | 0      | G |
| 20 | BICF2P39083             | 47647255 | C | 1    | 1      | A |
| 20 | BICF2P493837            | 47667118 | T | 0    | 0      | A |
| 20 | BICF2S23530535          | 47668973 | G | 0    | 0      | A |
| 20 | BICF2P1359844           | 47693540 | G | 0.25 | 0.2143 | A |
| 20 | BICF2P878447            | 47709032 | G | 0.5  | 0.4286 | A |
| 20 | BICF2P1377136           | 47716669 | A | NA   | 0.5714 | G |
| 20 | BICF2P747653            | 47737722 | G | 0.75 | 0.7857 | A |
| 20 | BICF2P534704            | 47753678 | A | 0.5  | 0.5714 | G |
| 20 | BICF2S22943565          | 47759108 | A | 0.75 | 0.7857 | G |
| 20 | BICF2S22943564          | 47759323 | A | 0.75 | 0.7857 | T |

|    |                         |          |   |      |        |   |
|----|-------------------------|----------|---|------|--------|---|
| 20 | BICF2P634880            | 47763271 | G | 0.25 | 0.2143 | A |
| 20 | BICF2P919040            | 47775806 | G | 0    | 0      | A |
| 20 | BICF2P282657            | 47789335 | A | 0.25 | 0.2143 | C |
| 20 | BICF2P282661            | 47791050 | A | 0    | 0      | C |
| 20 | BICF2P660242            | 47800066 | A | 0.75 | 0.9    | G |
| 20 | BICF2S23623084          | 47802598 | A | 0    | 0      | G |
| 20 | BICF2P705112            | 47821597 | A | 1    | 1      | G |
| 20 | BICF2S23532900          | 47839318 | C | 0.25 | 0.2143 | A |
| 20 | BICF2P1311935           | 47843749 | G | 0    | 0      | A |
| 20 | BICF2P173063            | 47852422 | 0 | 0    | 0      | G |
| 20 | BICF2P1153306           | 47868119 | G | 0    | 0      | A |
| 20 | BICF2P1333023           | 47883811 | G | 0.25 | 0.2143 | A |
| 20 | BICF2P1047544           | 47891983 | G | 0.25 | 0.2143 | A |
| 20 | BICF2P1324128           | 47908830 | C | 0.5  | 0.4286 | G |
| 20 | BICF2S23119820          | 47919855 | G | 0    | 0      | A |
| 20 | BICF2P878084            | 47926376 | A | 0.5  | 0.5714 | C |
| 20 | BICF2S23611709          | 47932669 | G | 0    | 0      | A |
| 20 | BICF2P951309            | 47944650 | A | 0.75 | 0.8333 | C |
| 20 | BICF2P1084749           | 47963302 | A | 0.75 | 0.7857 | G |
| 20 | BICF2P1050738           | 47970548 | A | 0.75 | 0.7857 | G |
| 20 | BICF2P857119            | 47978678 | 0 | 0    | 0      | G |
| 20 | BICF2P1438394           | 47989521 | G | 0.25 | 0.1667 | A |
| 20 | BICF2S23356014          | 48010132 | G | 0    | 0      | A |
| 20 | BICF2S23055921          | 48015018 | C | 0    | 0      | A |
| 20 | BICF2P411037            | 48026554 | A | 1    | 1      | G |
| 20 | BICF2S22949424          | 48038642 | A | 1    | 1      | G |
| 20 | BICF2P369275            | 48050623 | C | 0    | 0      | G |
| 20 | BICF2P952780            | 48060281 | A | 0.5  | 0.5714 | G |
| 20 | BICF2P1405309           | 48077227 | A | 0.75 | 0.8333 | G |
| 20 | TIGRP2P275103_rs9054475 | 48107061 | 0 | 0    | 0      | C |
| 20 | BICF2P1229326           | 48120195 | A | 0    | 0      | G |
| 20 | BICF2P301060            | 48130277 | A | 0.5  | 0.5714 | G |
| 20 | BICF2P706976            | 48139818 | G | 0.5  | 0.5714 | A |
| 20 | BICF2P497407            | 48149127 | A | 0    | 0      | C |
| 20 | BICF2P497411            | 48150794 | G | 0.5  | 0.5714 | A |
| 20 | BICF2P1033318           | 48169316 | A | 0.75 | 0.7857 | G |
| 20 | BICF2S23551734          | 48181145 | A | 0.75 | 0.7857 | G |
| 20 | BICF2P466627            | 48191301 | A | 0    | 0      | G |
| 20 | BICF2P384455            | 48206831 | G | 0.25 | 0.2143 | A |
| 20 | BICF2P1131016           | 48212038 | 0 | 0    | 0      | G |
| 20 | BICF2P283456            | 48223926 | G | 0    | 0      | A |
| 20 | BICF2P990351            | 48231130 | A | 0.25 | 0.2143 | C |
| 20 | BICF2P384376            | 48243608 | A | 0    | 0      | G |
| 20 | BICF2S23510370          | 48264265 | A | 0    | 0      | G |
| 20 | TIGRP2P275123_rs8755170 | 48284482 | 0 | 0    | 0      | A |
| 20 | BICF2P1403601           | 48293441 | 0 | 0    | 0      | A |
| 20 | BICF2S23247299          | 48321158 | C | 0.5  | 0.5714 | A |

|    |                         |          |   |      |        |   |
|----|-------------------------|----------|---|------|--------|---|
| 20 | BICF2S23713510          | 48324087 | A | 0    | 0      | G |
| 20 | BICF2P895750            | 48340382 | A | 0.5  | 0.5714 | G |
| 20 | BICF2P293888            | 48354446 | A | 0.5  | 0.5714 | G |
| 20 | BICF2S23646201          | 48365038 | A | 0.5  | 0.5714 | G |
| 20 | BICF2P299292            | 48377580 | A | 0    | 0      | C |
| 20 | BICF2P236786            | 48397045 | A | 0.5  | 0.5714 | C |
| 20 | BICF2P1160769           | 48414881 | G | 0.5  | 0.5714 | A |
| 20 | BICF2P822711            | 48417625 | A | 0.25 | 0.2143 | C |
| 20 | BICF2P273341            | 48433303 | A | 0    | 0      | G |
| 20 | BICF2P111858            | 48441860 | A | 0.25 | 0.2143 | G |
| 20 | BICF2S23717487          | 48450134 | A | 0.25 | 0.2143 | T |
| 20 | BICF2P398628            | 48495777 | A | 0    | 0      | G |
| 20 | BICF2P1267221           | 48516376 | A | 0.25 | 0.2143 | G |
| 20 | BICF2P852785            | 48529487 | G | 0.25 | 0.2143 | A |
| 20 | BICF2P717144            | 48543861 | A | 0    | 0      | G |
| 20 | BICF2P1033999           | 48555052 | G | 0    | 0      | A |
| 20 | BICF2P1293005           | 48568738 | G | 1    | 0.7857 | A |
| 20 | TIGRP2P275127_rs8577003 | 48576706 | 0 | 0    | 0      | G |
| 20 | BICF2P1344723           | 48592125 | G | 0    | 0      | A |
| 20 | BICF2P301921            | 48599799 | A | 0    | 0      | C |
| 20 | BICF2P1021805           | 48617486 | A | 0.75 | 0.7857 | G |
| 20 | BICF2P73100             | 48628393 | A | 0.75 | 0.7857 | G |
| 20 | BICF2P1167120           | 48637053 | G | 0.75 | 0.7857 | A |
| 20 | BICF2P576944            | 48651536 | A | 0    | 0      | G |
| 20 | BICF2P355591            | 48659824 | G | 1    | 1      | A |
| 20 | BICF2P603818            | 48669302 | G | 0.75 | 0.7857 | A |
| 20 | BICF2S23421605          | 48684995 | A | 0.75 | 0.7857 | C |
| 20 | BICF2P436561            | 48706732 | A | 0    | 0      | G |
| 20 | BICF2S23135668          | 48721573 | A | 0.25 | 0.2143 | G |
| 20 | TIGRP2P275133_rs8640655 | 48728288 | 0 | 0    | 0      | C |
| 20 | TIGRP2P275134_rs9209912 | 48746825 | 0 | 0    | 0      | A |
| 20 | BICF2S23712645          | 48763652 | A | 0    | 0      | G |
| 20 | BICF2P345488            | 48780557 | A | 0.75 | 0.7857 | G |
| 20 | BICF2P1043575           | 48785169 | G | 0.25 | 0.2143 | A |
| 20 | G1116f30S182            | 48818575 | G | 0    | 0      | A |
| 20 | BICF2P302160            | 48837386 | C | 0    | 0      | A |
| 20 | BICF2S23635596          | 48841603 | A | 0    | 0      | G |
| 20 | BICF2P830231            | 48855184 | A | 0    | 0      | G |
| 20 | BICF2P800301            | 48865993 | A | 0    | 0      | T |
| 20 | BICF2P800294            | 48867002 | G | 0.75 | 0.7857 | A |
| 20 | BICF2S22957149          | 48882730 | A | 0    | 0      | G |
| 20 | BICF2P866141            | 48889549 | G | 0    | 0      | A |
| 20 | BICF2P222140            | 48900677 | A | 0    | 0      | T |
| 20 | BICF2P1382907           | 48920467 | 0 | 0    | 0      | A |
| 20 | BICF2P1254636           | 48928124 | A | 0.25 | 0.2143 | G |
| 20 | BICF2P1389617           | 48930946 | G | 0.75 | 0.7857 | A |
| 20 | BICF2S23312817          | 48935026 | A | 0.5  | 0.5714 | G |

|    |                         |          |   |      |        |   |
|----|-------------------------|----------|---|------|--------|---|
| 20 | BICF2P1268674           | 48945007 | A | 0.75 | 0.7857 | G |
| 20 | BICF2P1465662           | 48963283 | G | 0    | 0      | A |
| 20 | BICF2P937089            | 48982779 | A | 0.75 | 0.7857 | C |
| 20 | BICF2P999577            | 48999259 | G | 0.25 | 0.2143 | A |
| 20 | BICF2P1056026           | 49003875 | G | 0.75 | 0.7857 | A |
| 20 | BICF2P886706            | 49019261 | A | 0.75 | 0.7857 | G |
| 20 | BICF2P1202229           | 49028407 | A | 0.75 | 0.7857 | G |
| 20 | BICF2P388763            | 49036004 | A | 0.5  | 0.5714 | G |
| 20 | BICF2S23030593          | 49051702 | G | 0.25 | 0.2143 | A |
| 20 | BICF2P121159            | 49099123 | 0 | 0    | 0      | G |
| 20 | BICF2P1197269           | 49127087 | A | 0    | 0      | G |
| 20 | BICF2P640838            | 49141333 | A | 0    | 0      | G |
| 20 | BICF2P1295866           | 49170861 | A | 0    | 0      | G |
| 20 | BICF2S23233737          | 49194199 | A | 0    | 0      | G |
| 20 | BICF2P623297            | 49201505 | G | 0    | 0      | A |
| 20 | BICF2P1223374           | 49218352 | A | 0    | 0      | G |
| 20 | BICF2P847185            | 49223697 | G | 0    | 0      | A |
| 20 | BICF2P276638            | 49239098 | G | 0    | 0      | A |
| 20 | BICF2P1238591           | 49256980 | A | 0    | 0      | G |
| 20 | BICF2P941820            | 49259874 | A | 0    | 0      | G |
| 20 | BICF2S23622420          | 49266230 | G | 0    | 0      | A |
| 20 | BICF2S2453932           | 49286463 | C | 0    | 0      | A |
| 20 | BICF2P1407313           | 49295181 | A | 0.5  | 0.4286 | C |
| 20 | BICF2P548078            | 49300965 | 0 | 0    | 0      | C |
| 20 | BICF2P698523            | 49327501 | 0 | 0    | 0      | G |
| 20 | BICF2P1070542           | 49345797 | A | 0.5  | 0.5714 | G |
| 20 | BICF2P566252            | 49347773 | G | 0    | 0      | A |
| 20 | BICF2P452901            | 49353358 | C | 0    | 0      | A |
| 20 | BICF2P721896            | 49358851 | A | 0    | 0      | G |
| 20 | BICF2P863389            | 49371657 | A | 0.5  | 0.4286 | G |
| 20 | BICF2P250483            | 49389305 | 0 | 0    | 0      | G |
| 20 | BICF2S23646202          | 49405478 | A | 0    | 0      | C |
| 20 | BICF2S23029518          | 49432013 | A | 0    | 0      | C |
| 20 | TIGRP2P275215_rs8741137 | 49444063 | 0 | 0    | 0      | T |
| 20 | BICF2S23742774          | 49456570 | A | 0    | 0      | G |
| 20 | TIGRP2P275266_rs8594077 | 49487493 | 0 | 0    | 0      | A |
| 20 | BICF2P266968            | 49509173 | C | 0.25 | 0.25   | A |
| 20 | BICF2S22910947          | 49520297 | 0 | 0    | 0      | G |
| 20 | BICF2S23024406          | 49546120 | 0 | 0    | 0      | G |
| 20 | BICF2S23624826          | 49560694 | A | 0.25 | 0.2143 | G |
| 20 | BICF2P1465070           | 49587903 | 0 | 0    | 0      | A |
| 20 | BICF2P1159639           | 49603284 | A | 0.25 | 0.2143 | C |
| 20 | BICF2P320126            | 49629721 | A | 0    | 0      | G |
| 20 | BICF2P79722             | 49634930 | A | 0    | 0      | C |
| 20 | BICF2P1397134           | 49646389 | A | 0.5  | 0.5714 | G |
| 20 | BICF2S23650893          | 49660538 | A | 0    | 0      | G |
| 20 | BICF2P386836            | 49665875 | A | 0.5  | 0.3333 | G |

|    |                         |          |   |      |        |   |
|----|-------------------------|----------|---|------|--------|---|
| 20 | BICF2P1172092           | 49669943 | A | 0.5  | 0.4286 | G |
| 20 | BICF2P766049            | 49690415 | A | 0.25 | 0.2143 | G |
| 20 | BICF2P114310            | 49695453 | A | 0.5  | 0.5714 | G |
| 20 | BICF2P528211            | 49715259 | A | 0.5  | 0.4286 | C |
| 20 | BICF2S2376197           | 49726685 | G | 0.5  | 0.5714 | A |
| 20 | BICF2P243915            | 49751088 | 0 | 0    | 0      | G |
| 20 | BICF2S24313329          | 49755956 | G | 0    | 0      | A |
| 20 | TIGRP2P275333_rs8989478 | 49764672 | 0 | 0    | 0      | C |
| 20 | BICF2P335529            | 49781380 | G | 0.25 | 0.2143 | A |
| 20 | BICF2P923420            | 49792754 | G | 0.25 | 0.2143 | A |
| 20 | BICF2P201820            | 49802825 | G | 0.25 | 0.2143 | A |
| 20 | BICF2P466022            | 49808888 | A | 0.25 | 0.2143 | T |
| 20 | BICF2P773               | 49820634 | A | 0.25 | 0.2143 | G |
| 20 | BICF2P1135116           | 49840908 | A | 0.25 | 0.2143 | G |
| 20 | BICF2P1135117           | 49841979 | G | 0.25 | 0.2143 | C |
| 20 | BICF2S23554456          | 49856059 | 0 | 0    | 0      | A |
| 20 | BICF2P419296            | 49870528 | C | 0.25 | 0.2143 | A |
| 20 | BICF2P698187            | 49878226 | G | 0.25 | 0.2143 | A |
| 20 | BICF2S23661193          | 49895731 | A | 0.25 | 0.2143 | G |
| 20 | BICF2P5199              | 49899924 | G | 0.25 | 0.2143 | A |
| 20 | BICF2P1385898           | 49912096 | A | 0.25 | 0.2143 | T |
| 20 | BICF2P733636            | 49922698 | A | 0.25 | 0.2143 | C |
| 20 | BICF2P946697            | 49942369 | C | 0.25 | 0.2143 | G |
| 20 | BICF2P1356514           | 49947426 | G | 0.25 | 0.2143 | A |
| 20 | BICF2P908327            | 49961071 | G | 0.75 | 0.7857 | A |
| 20 | BICF2P220560            | 49969240 | A | 0.25 | 0.2143 | G |
| 20 | BICF2P730866            | 49989187 | A | 0.25 | 0.1667 | G |
| 20 | BICF2P902189            | 50017501 | A | 0.5  | 0.5714 | G |
| 20 | BICF2P1079169           | 50035369 | G | 0    | 0      | A |
| 20 | BICF2P1146985           | 50042217 | A | 0    | 0      | G |
| 20 | BICF2P1090714           | 50050134 | A | 0    | 0      | G |
| 20 | BICF2S23343409          | 50064067 | A | 0    | 0      | G |
| 20 | BICF2P1133822           | 50091400 | A | 0    | 0      | G |
| 20 | BICF2P68497             | 50099593 | G | 0.5  | 0.4286 | A |
| 20 | BICF2P681010            | 50113642 | G | 0.5  | 0.5714 | A |
| 20 | BICF2P1039638           | 50118393 | C | 0.5  | 0.4286 | A |
| 20 | BICF2S2293383           | 50143693 | A | 0    | 0      | G |
| 20 | BICF2S23539548          | 50158805 | A | 0.5  | 0.4286 | G |
| 20 | BICF2P256266            | 50163369 | A | 0.5  | 0.4286 | G |
| 20 | BICF2P1233831           | 50169070 | A | 0    | 0      | C |
| 20 | BICF2P406329            | 50178247 | A | 0    | 0      | G |
| 20 | BICF2S23761424          | 50194216 | A | 0.5  | 0.5    | G |
| 20 | BICF2P1052690           | 50202842 | G | 0    | 0      | A |
| 20 | BICF2P1442583           | 50223393 | G | 0    | 0      | A |
| 20 | BICF2P1217373           | 50234843 | 0 | 0    | 0      | A |
| 20 | BICF2P464134            | 50245147 | A | 0    | 0      | G |
| 20 | BICF2S23213216          | 50270632 | G | 0.5  | 0.5714 | A |

|    |                         |          |   |      |         |   |
|----|-------------------------|----------|---|------|---------|---|
| 20 | BICF2P1244982           | 50295644 | G | 0.5  | 0.5714  | A |
| 20 | BICF2P1498241           | 50316493 | A | 0.5  | 0.4286  | C |
| 20 | BICF2S23160403          | 50326189 | A | 0.5  | 0.5714  | G |
| 20 | BICF2P786712            | 50335780 | G | 0.5  | 0.5714  | A |
| 20 | BICF2P170748            | 50355416 | G | 0.5  | 0.5714  | A |
| 20 | BICF2P1368656           | 50359401 | A | 0.5  | 0.4286  | G |
| 20 | BICF2P1088095           | 50378688 | A | 0    | 0       | C |
| 20 | BICF2S2343328           | 50384304 | A | 0    | 0       | G |
| 20 | BICF2P927299            | 50397806 | A | 0    | 0       | G |
| 20 | BICF2S23249263          | 50408675 | 0 | 0    | 0       | C |
| 20 | BICF2P430163            | 50425997 | 0 | 0    | 0       | C |
| 20 | BICF2P979684            | 50427963 | 0 | 0    | 0       | A |
| 20 | G1118f13S237            | 50453596 | G | 0    | 0       | C |
| 20 | BICF2P1213016           | 50481045 | A | 0.5  | 0.4286  | C |
| 20 | BICF2P592849            | 50506979 | 0 | 0    | 0       | A |
| 20 | BICF2P110800            | 50526168 | 0 | 0    | 0       | G |
| 20 | BICF2P523981            | 50537667 | G | 0    | 0       | A |
| 20 | BICF2P430374            | 50542888 | 0 | 0    | 0       | A |
| 20 | BICF2S23438423          | 50550032 | A | 0    | 0       | G |
| 20 | BICF2P1496355           | 50561024 | A | 0    | 0       | G |
| 20 | BICF2P211050            | 50575525 | G | 0.5  | 0.5714  | A |
| 20 | BICF2P457656            | 50583604 | C | 0    | 0       | A |
| 20 | BICF2P413144            | 50592760 | A | 0    | 0       | G |
| 20 | BICF2P300997            | 50611336 | G | 0    | 0       | A |
| 20 | BICF2P314298            | 50647856 | 0 | 0    | 0       | C |
| 20 | BICF2P1130656           | 50659613 | 0 | 0    | 0       | T |
| 20 | BICF2P591958            | 50716128 | G | 0.5  | 0.6     | A |
| 20 | BICF2P562649            | 50736919 | A | 0    | 0       | G |
| 20 | TIGRP2P275414_rs8838881 | 50740606 | 0 | 0    | 0       | G |
| 20 | BICF2S22937762          | 50751580 | 0 | 0    | 0       | A |
| 20 | BICF2P335732            | 50763356 | G | 0    | 0       | A |
| 20 | BICF2P286886            | 50776895 | 0 | 0    | 0       | G |
| 20 | BICF2P386861            | 50786262 | 0 | 0    | 0       | G |
| 20 | BICF2P1164760           | 50852766 | 0 | 0    | 0       | A |
| 20 | BICF2P89766             | 50857555 | 0 | 0    | 0       | G |
| 20 | BICF2S23121289          | 50869560 | G | 0    | 0       | A |
| 20 | BICF2P780302            | 50877062 | G | 0    | 0       | C |
| 20 | BICF2P1187776           | 50891872 | 0 | 0    | 0       | A |
| 20 | BICF2P1070758           | 50904866 | 0 | 0    | 0       | G |
| 20 | BICF2P448326            | 50934402 | 0 | 0    | 0       | G |
| 20 | BICF2P613152            | 50945847 | 0 | 0    | 0       | G |
| 20 | TIGRP2P275433_rs8607527 | 50968415 | 0 | 0    | 0       | G |
| 20 | BICF2P1191359           | 50991317 | C | 0.5  | 0.08333 | A |
| 20 | BICF2P404362            | 51025113 | G | 0    | 0       | C |
| 20 | BICF2S2371647           | 51028456 | G | 0.25 | 0.2143  | A |
| 20 | BICF2P34880             | 51041057 | 0 | 0    | 0       | A |
| 20 | BICF2P729978            | 51057654 | A | 1    | 0.7857  | G |



|    |                         |          |   |      |        |   |
|----|-------------------------|----------|---|------|--------|---|
| 20 | BICF2P328242            | 51068512 | A | 0.75 | 0.7857 | G |
| 20 | BICF2P1341961           | 51078695 | A | 0    | 0      | G |
| 20 | BICF2P1078602           | 51088961 | 0 | 0    | 0      | A |
| 20 | BICF2P859562            | 51094650 | G | 0    | 0      | A |
| 20 | BICF2P755649            | 51107455 | 0 | 0    | 0      | G |
| 20 | BICF2S22960788          | 51108047 | G | 0    | 0      | A |
| 20 | BICF2P234636            | 51134051 | 0 | 0    | 0      | G |
| 20 | BICF2S2328420           | 51150968 | A | 0.5  | 0.6429 | G |
| 20 | BICF2P367799            | 51163001 | 0 | 0    | 0      | G |
| 20 | BICF2S23348990          | 51169947 | A | 0.5  | 0.6429 | C |
| 20 | BICF2P1439931           | 51176860 | 0 | 0    | 0      | G |
| 20 | BICF2P269279            | 51178687 | A | 0    | 0      | C |
| 20 | BICF2P336117            | 51183200 | G | 0    | 0      | A |
| 20 | BICF2P13134             | 51199077 | G | 0.5  | 0.7143 | C |
| 20 | BICF2P30235             | 51218097 | A | 0.5  | 0.6429 | G |
| 20 | BICF2P684133            | 51225932 | A | 0.5  | 0.6429 | G |
| 20 | BICF2P211485            | 51234404 | A | 0.5  | 0.6429 | G |
| 20 | BICF2P1344078           | 51250092 | 0 | 0    | 0      | G |
| 20 | BICF2P1116156           | 51256406 | 0 | 0    | 0      | G |
| 20 | BICF2S23529036          | 51275975 | G | 0.5  | 0.6429 | A |
| 20 | BICF2P428588            | 51285925 | G | 0.5  | 0.6429 | A |
| 20 | BICF2P1277815           | 51293507 | G | 0.5  | 0.6429 | A |
| 20 | BICF2P1451718           | 51303591 | G | 0    | 0      | A |
| 20 | BICF2P405590            | 51323895 | C | 0    | 0      | A |
| 20 | BICF2S23323755          | 51331433 | G | 0    | 0      | A |
| 20 | TIGRP2P275456_rs8691329 | 51346488 | 0 | 0    | 0      | A |
| 20 | BICF2P849572            | 51358328 | G | 1    | 1      | A |
| 20 | BICF2P1295779           | 51366026 | A | 0    | 0      | G |
| 20 | BICF2P1436732           | 51379538 | 0 | 0    | 0      | A |
| 20 | BICF2P777635            | 51403698 | G | 0.25 | 0.1429 | A |
| 20 | BICF2P1224559           | 51421753 | 0 | 0    | 0      | G |
| 20 | BICF2P274227            | 51431449 | A | 0.5  | 0.3571 | G |
| 20 | BICF2P1114392           | 51448477 | 0 | 0    | 0      | G |
| 20 | BICF2P1002030           | 51455747 | 0 | 0    | 0      | G |
| 20 | BICF2P389157            | 51463152 | A | 0    | 0      | G |
| 20 | BICF2P324210            | 51481199 | G | 0    | 0      | A |
| 20 | BICF2S237774            | 51485831 | G | 0    | 0      | A |
| 20 | BICF2P694907            | 51499781 | G | 0.5  | 0.6429 | A |
| 20 | BICF2P558625            | 51518028 | C | 0.5  | 0.6429 | A |
| 20 | BICF2S23650772          | 51522954 | C | 0.5  | 0.6429 | A |
| 20 | BICF2S2399921           | 51542485 | 0 | 0    | 0      | A |
| 20 | BICF2P873039            | 51568157 | 0 | 0    | 0      | G |
| 20 | BICF2S23024288          | 51585095 | A | 0    | 0      | G |
| 20 | BICF2S233364            | 51589888 | A | 0    | 0      | C |
| 20 | BICF2P840653            | 51603881 | A | 0.5  | 0.6429 | G |
| 20 | BICF2P131789            | 51617465 | G | 0.25 | 0.2143 | A |
| 20 | BICF2S23120096          | 51633349 | A | 0    | 0      | G |

|    |                         |          |   |      |        |   |
|----|-------------------------|----------|---|------|--------|---|
| 20 | BICF2S23718953          | 51650376 | A | 0.5  | 0.3571 | G |
| 20 | BICF2P1384210           | 51679429 | C | 0.25 | 0.3571 | G |
| 20 | BICF2P98324             | 51699091 | G | 0.5  | 0.5    | A |
| 20 | BICF2P325265            | 51704853 | G | 0.5  | 0.5    | A |
| 20 | BICF2S23255436          | 51721869 | A | 0.5  | 0.5    | T |
| 20 | BICF2P827069            | 51730143 | A | 0.5  | 0.5    | G |
| 20 | BICF2S23517313          | 51748055 | A | 0.5  | 0.5    | G |
| 20 | BICF2S23016840          | 51750340 | G | 0.5  | 0.5    | A |
| 20 | BICF2P633990            | 51783168 | 0 | 0    | 0      | G |
| 20 | BICF2P325339            | 51810643 | 0 | 0    | 0      | C |
| 20 | TIGRP2P275474_rs8665433 | 51849581 | 0 | 0    | 0      | G |
| 20 | BICF2P1368972           | 51858281 | A | 0    | 0      | G |
| 20 | BICF2P1245102           | 51873051 | G | 0.25 | 0.3571 | A |
| 20 | BICF2S23615880          | 51903727 | G | 0.25 | 0.3571 | A |
| 20 | BICF2P22023             | 51920372 | 0 | 0    | 0      | G |
| 20 | BICF2S23625167          | 51923506 | G | 0    | 0      | A |
| 20 | BICF2P249335            | 51955022 | 0 | 0    | 0      | C |
| 20 | BICF2S2377861           | 51976366 | G | 0.25 | 0.1429 | A |
| 20 | BICF2P866609            | 51991257 | 0 | 0    | 0      | G |
| 20 | BICF2P646851            | 51993612 | 0 | 0    | 0      | A |
| 20 | BICF2P324158            | 52004664 | 0 | 0    | 0      | C |
| 20 | BICF2P624900            | 52020857 | 0 | 0    | 0      | C |
| 20 | BICF2S23116836          | 52037237 | A | 0.25 | 0.1429 | G |
| 20 | BICF2P1226685           | 52045199 | 0 | 0    | 0      | G |
| 20 | BICF2S24111522          | 52090853 | C | 0    | 0      | A |
| 20 | BICF2P1216521           | 52095552 | 0 | 0    | 0      | G |
| 20 | BICF2P679272            | 52133839 | 0 | 0    | 0      | G |
| 20 | BICF2S23616110          | 52146032 | A | 0    | 0      | C |
| 20 | BICF2P450675            | 52154675 | 0 | 0    | 0      | G |
| 20 | TIGRP2P275478_rs9079695 | 52173562 | 0 | 0    | 0      | C |
| 20 | BICF2P1190885           | 52179298 | 0 | 0    | 0      | G |
| 20 | BICF2S23429324          | 52191327 | G | 0    | 0      | A |
| 20 | BICF2P1309642           | 52199859 | A | 0.25 | 0.3333 | G |
| 20 | BICF2P1308129           | 52216313 | A | 0.25 | 0.3571 | T |
| 20 | BICF2P570397            | 52226054 | G | 0.5  | 0.6429 | A |
| 20 | BICF2P762806            | 52238929 | A | 0.25 | 0.3571 | G |
| 20 | BICF2P380516            | 52250363 | G | 0.5  | 0.3571 | A |
| 20 | BICF2P882558            | 52265235 | A | 0.25 | 0.3571 | G |
| 20 | BICF2P823361            | 52274182 | 0 | 0    | 0      | A |
| 20 | BICF2P1308308           | 52286837 | A | 0.25 | 0.3571 | G |
| 20 | BICF2P1308307           | 52287986 | 0 | 0    | 0      | C |
| 20 | BICF2P940957            | 52290767 | A | 0.25 | 0.3571 | G |
| 20 | BICF2P1087660           | 52304416 | 0 | 0    | 0      | G |
| 20 | BICF2P420488            | 52326317 | A | 0.25 | 0.3571 | G |
| 20 | BICF2S2361871           | 52356102 | A | 0    | 0      | G |
| 20 | BICF2P90973             | 52361300 | 0 | 0    | 0      | C |
| 20 | BICF2P434667            | 52379537 | 0 | 0    | 0      | G |

|    |                         |          |   |      |         |   |
|----|-------------------------|----------|---|------|---------|---|
| 20 | TIGRP2P275489_rs9055841 | 52392766 | 0 | 0    | 0       | C |
| 20 | BICF2P241264            | 52408073 | 0 | 0    | 0       | C |
| 20 | BICF2S23738777          | 52421057 | G | 0.25 | 0.3571  | A |
| 20 | BICF2P1363183           | 52428504 | G | 0.5  | 0.6429  | A |
| 20 | BICF2P1012008           | 52443711 | A | 0.5  | 0.6429  | G |
| 20 | BICF2P1301903           | 52453863 | A | 0.25 | 0.2857  | G |
| 20 | BICF2P487387            | 52464970 | A | 0.25 | 0.2857  | C |
| 20 | BICF2P115068            | 52478749 | A | 0.25 | 0.2857  | G |
| 20 | BICF2S23632482          | 52502261 | A | 0    | 0       | C |
| 20 | BICF2P768230            | 52529475 | 0 | 0    | 0       | G |
| 20 | BICF2S23452740          | 52538855 | A | 0    | 0       | G |
| 20 | BICF2S2443364           | 52557012 | G | 0.25 | 0.3571  | A |
| 20 | BICF2S23029532          | 52568047 | 0 | 0    | 0       | C |
| 20 | BICF2P249604            | 52611255 | 0 | 0    | 0       | A |
| 20 | BICF2P968478            | 52618198 | G | 0.75 | 0.7143  | A |
| 20 | BICF2P113402            | 52659830 | A | 0.25 | 0.1429  | G |
| 20 | G1119f24S91             | 52689312 | 0 | 0    | 0       | A |
| 20 | G1119f30S86             | 52694694 | 0 | 0    | 0       | G |
| 20 | BICF2P485241            | 52736141 | G | 0.25 | 0.1429  | C |
| 20 | BICF2P849244            | 52740189 | G | 0.5  | 0.5     | A |
| 20 | BICF2S22922276          | 52750994 | A | 0    | 0       | C |
| 20 | BICF2P969188            | 52774653 | G | 0.25 | 0.08333 | A |
| 20 | BICF2P480036            | 52795637 | G | 0.25 | 0.1429  | A |
| 20 | BICF2P510344            | 52805235 | G | 0.25 | 0.1429  | A |
| 20 | BICF2P136427            | 52816647 | A | 0.25 | 0.1429  | G |
| 20 | BICF2S23235197          | 52820645 | G | 0    | 0       | A |
| 20 | BICF2S23029058          | 52841502 | C | 0    | 0       | A |
| 20 | BICF2S23418602          | 52848535 | A | 0    | 0       | G |
| 20 | BICF2P1352629           | 52876116 | A | 0.5  | 0.5     | G |
| 20 | BICF2P247926            | 52897023 | 0 | 0    | 0       | G |
| 20 | BICF2P347679            | 52902013 | G | 0.5  | 0.5     | A |
| 20 | BICF2P1119676           | 52912882 | G | 0.5  | 0.5     | C |
| 20 | BICF2P1322209           | 52924819 | A | 0.5  | 0.5     | G |
| 20 | BICF2G630448392         | 52937876 | A | 0.25 | 0.2857  | G |
| 20 | BICF2P1264576           | 52949501 | A | 0.5  | 0.5     | C |
| 20 | BICF2G630448374         | 52967259 | A | 0.5  | 0.5     | C |
| 20 | BICF2S23234506          | 52975463 | C | 0.25 | 0.2857  | G |
| 20 | BICF2S23132786          | 52986876 | A | 0.25 | 0.2857  | G |
| 20 | BICF2G630448354         | 53010725 | A | 0.25 | 0.25    | G |
| 20 | BICF2G630448341         | 53017458 | G | 0.25 | 0.2857  | A |
| 20 | BICF2P224625            | 53034909 | A | 0.25 | 0.2857  | G |
| 20 | BICF2G630448285         | 53041197 | G | 0    | 0       | A |
| 20 | BICF2G630448275         | 53056042 | A | 0.25 | 0.2857  | G |
| 20 | BICF2G630448270         | 53065740 | G | 0    | 0       | A |
| 20 | BICF2P727560            | 53095018 | A | 0    | 0       | G |
| 20 | BICF2S22914561          | 53098761 | G | 0    | 0       | A |
| 20 | BICF2P285735            | 53107785 | G | 0.25 | 0.2857  | A |

|    |                         |          |   |      |        |   |
|----|-------------------------|----------|---|------|--------|---|
| 20 | BICF2P1221121           | 53128105 | G | 0    | 0      | C |
| 20 | BICF2P208027            | 53130766 | A | 0    | 0      | G |
| 20 | BICF2P38597             | 53141720 | G | 0.25 | 0.2857 | C |
| 20 | BICF2G630448265         | 53156577 | A | 0.25 | 0.2857 | G |
| 20 | BICF2P1094780           | 53173290 | A | 0.25 | 0.2857 | G |
| 20 | BICF2G630448257         | 53180000 | 0 | 0    | 0      | A |
| 20 | BICF2G630448248         | 53193012 | 0 | 0    | 0      | G |
| 20 | BICF2G630448246         | 53198453 | 0 | 0    | 0      | G |
| 20 | BICF2G630448242         | 53207977 | 0 | 0    | 0      | G |
| 20 | BICF2G630448240         | 53211234 | 0 | 0    | 0      | A |
| 20 | BICF2G630448237         | 53226810 | A | 0.25 | 0.2857 | G |
| 20 | BICF2S2325404           | 53237427 | G | 0    | 0      | A |
| 20 | BICF2G630448233         | 53247697 | A | 0    | 0      | G |
| 20 | BICF2P1244884           | 53273760 | A | 0    | 0      | C |
| 20 | BICF2G630448214         | 53290439 | C | 0    | 0      | G |
| 20 | BICF2P112634            | 53292709 | A | 0    | 0      | G |
| 20 | BICF2S22963301          | 53309195 | A | 0.75 | 0.7143 | G |
| 20 | BICF2G630448190         | 53315444 | A | 0    | 0      | G |
| 20 | BICF2S22911473          | 53348080 | A | 0.25 | 0.2857 | G |
| 20 | BICF2S23733734          | 53358406 | A | 0.75 | 0.7143 | G |
| 20 | BICF2P395576            | 53360064 | A | 0.25 | 0.2857 | G |
| 20 | BICF2G630448138         | 53390819 | A | 0.25 | 0.2857 | G |
| 20 | TIGRP2P275526_rs8978007 | 53397967 | 0 | 0    | 0      | G |
| 20 | BICF2G630448124         | 53423249 | G | 0.25 | 0.2143 | A |
| 20 | BICF2G630448109         | 53440100 | A | 0.5  | 0.5    | G |
| 20 | BICF2G630448108         | 53441094 | A | 0.25 | 0.2143 | G |
| 20 | BICF2P265377            | 53456350 | A | 0.25 | 0.2143 | G |
| 20 | BICF2G630448103         | 53468649 | A | 0.5  | 0.5    | G |
| 20 | BICF2G630448095         | 53480995 | A | 0.25 | 0.2143 | G |
| 20 | BICF2G630448094         | 53482899 | A | 0.25 | 0.2143 | G |
| 20 | BICF2G630448091         | 53490023 | A | 0.5  | 0.5    | T |
| 20 | BICF2G630448084         | 53500213 | A | 0    | 0      | G |
| 20 | BICF2S23650442          | 53523628 | A | 0.25 | 0.2143 | G |
| 20 | BICF2P236588            | 53545238 | 0 | 0    | 0      | C |
| 20 | BICF2S23216585          | 53566847 | A | 0.25 | 0.25   | G |
| 20 | BICF2G630448074         | 53576696 | 0 | 0    | 0      | A |
| 20 | BICF2G630448069         | 53580351 | 0 | 0    | 0      | A |
| 20 | BICF2P1103093           | 53592705 | C | 0.5  | 0.5    | A |
| 20 | BICF2P1043560           | 53607445 | A | 0    | 0      | G |
| 20 | BICF2P840159            | 53620239 | A | 0    | 0      | G |
| 20 | BICF2G630448028         | 53634041 | A | 0.75 | 0.7143 | G |
| 20 | BICF2G630448015         | 53644425 | A | 0.25 | 0.2143 | G |
| 20 | BICF2P504582            | 53648162 | G | 0    | 0      | A |
| 20 | BICF2P1394248           | 53670119 | A | 0.25 | 0.2857 | G |
| 20 | BICF2G630448009         | 53689260 | A | 0    | 0      | G |
| 20 | BICF2G630447999         | 53704407 | G | 0    | 0      | A |
| 20 | BICF2G630447988         | 53713752 | G | 0    | 0      | A |

|    |                 |          |   |      |        |   |
|----|-----------------|----------|---|------|--------|---|
| 20 | BICF2G630447985 | 53717836 | A | 0.25 | 0.2143 | G |
| 20 | BICF2S23612292  | 53731655 | A | 0    | 0      | G |
| 20 | BICF2P1232812   | 53741082 | A | 0.25 | 0.2857 | G |
| 20 | BICF2G630447969 | 53756679 | A | 0    | 0      | G |
| 20 | BICF2G630447957 | 53779947 | G | 0.25 | 0.2143 | A |
| 20 | BICF2G630447954 | 53789318 | 0 | 0    | 0      | G |
| 20 | BICF2P1216488   | 53804598 | A | 0    | 0      | G |
| 20 | BICF2G630447953 | 53806203 | G | 0    | 0      | A |
| 20 | BICF2S24113528  | 53817973 | A | 0.25 | 0.2857 | G |
| 20 | BICF2P209556    | 53829135 | C | 0.5  | 0.5    | A |
| 20 | BICF2G630447950 | 53834056 | A | 0.5  | 0.5    | G |
| 20 | BICF2G630447944 | 53852927 | A | 0    | 0      | G |
| 20 | BICF2P1092368   | 53865588 | 0 | 0    | 0      | G |
| 20 | BICF2G630447940 | 53870098 | G | 0    | 0      | A |
| 20 | BICF2G630447938 | 53886203 | G | 0    | 0      | A |
| 20 | BICF2G630447935 | 53905478 | 0 | 0    | 0      | G |
| 20 | BICF2G630447933 | 53920883 | A | 0    | 0      | G |
| 20 | BICF2G630447932 | 53925524 | A | 0    | 0      | G |
| 20 | BICF2S22954676  | 53930945 | A | 0.5  | 0.5    | G |
| 20 | BICF2P160870    | 53941064 | G | 0    | 0      | A |
| 20 | BICF2G630447919 | 53955151 | 0 | 0    | 0      | A |
| 20 | BICF2P512492    | 53962823 | 0 | 0    | 0      | G |
| 20 | BICF2G630447910 | 53974718 | G | 0    | 0      | A |
| 20 | BICF2S23044491  | 53988383 | A | 0    | 0      | G |
| 20 | BICF2G630447888 | 54000010 | G | 0    | 0      | A |
| 20 | BICF2G630447884 | 54006129 | G | 0    | 0      | A |
| 20 | BICF2P816605    | 54017559 | 0 | 0    | 0      | G |
| 20 | BICF2P1335036   | 54031545 | A | 0.25 | 0.2143 | G |
| 20 | BICF2G630447880 | 54046117 | G | 0.25 | 0.2143 | A |
| 20 | BICF2G630447877 | 54057095 | A | 0    | 0      | G |
| 20 | BICF2G630447874 | 54064598 | C | 0.5  | 0.4286 | A |
| 20 | BICF2P1367402   | 54074952 | A | 0    | 0      | G |
| 20 | BICF2S23441345  | 54089627 | G | 0.5  | 0.4286 | A |
| 20 | BICF2P1225609   | 54120117 | 0 | 0    | 0      | A |
| 20 | BICF2G630447830 | 54139406 | G | 0    | 0      | A |
| 20 | BICF2G630447823 | 54142090 | 0 | 0    | 0      | G |
| 20 | BICF2G630447801 | 54153655 | 0 | 0    | 0      | A |
| 20 | BICF2G630447779 | 54168458 | A | 0    | 0      | G |
| 20 | BICF2G630447774 | 54176844 | A | 0    | 0      | G |
| 20 | BICF2G630447770 | 54177622 | C | 0    | 0      | G |
| 20 | BICF2G630447764 | 54188613 | A | 0.25 | 0.2143 | G |
| 20 | BICF2G630447752 | 54204728 | C | 0.75 | 0.7143 | A |
| 20 | BICF2G630447731 | 54219185 | A | 0    | 0      | G |
| 20 | BICF2G630447729 | 54226986 | A | 0    | 0      | G |
| 20 | BICF2P1457928   | 54235604 | A | 0    | 0      | G |
| 20 | BICF2P950809    | 54246567 | G | 0    | 0      | A |
| 20 | BICF2G630447722 | 54257687 | A | 0.5  | 0.5    | G |

|    |                         |          |   |      |        |   |
|----|-------------------------|----------|---|------|--------|---|
| 20 | BICF2P659228            | 54275140 | A | 0    | 0      | G |
| 20 | BICF2P160729            | 54287181 | A | 0    | 0      | C |
| 20 | BICF2P169115            | 54296162 | A | 0    | 0      | G |
| 20 | BICF2P1182361           | 54319573 | G | 0    | 0      | A |
| 20 | BICF2P525798            | 54327286 | T | 0    | 0      | A |
| 20 | BICF2P877322            | 54329179 | G | 0    | 0      | A |
| 20 | BICF2P156533            | 54338648 | A | 0    | 0      | C |
| 20 | BICF2S23024782          | 54356696 | G | 0.75 | 0.7143 | C |
| 20 | BICF2P550967            | 54362981 | A | 0.25 | 0.2857 | G |
| 20 | BICF2P549132            | 54372622 | C | 0    | 0      | A |
| 20 | BICF2P1322773           | 54392633 | 0 | 0    | 0      | G |
| 20 | BICF2P540907            | 54401759 | 0 | 0    | 0      | A |
| 20 | BICF2G630447709         | 54415299 | A | 0.5  | 0.5    | G |
| 20 | BICF2P896578            | 54429395 | A | 0    | 0      | G |
| 20 | BICF2P742564            | 54431380 | A | 0    | 0      | G |
| 20 | BICF2G630447706         | 54446668 | A | 0.5  | 0.5    | G |
| 20 | BICF2P24004             | 54459725 | G | 0    | 0      | A |
| 20 | BICF2P464796            | 54465772 | G | 0    | 0      | A |
| 20 | BICF2G630447663         | 54493878 | A | 0    | 0      | C |
| 20 | BICF2G630447648         | 54503423 | A | 0.25 | 0.2143 | G |
| 20 | BICF2G630447642         | 54516274 | G | 0.25 | 0.2143 | A |
| 20 | BICF2G630447632         | 54527921 | G | 0.75 | 0.7143 | A |
| 20 | BICF2G630447621         | 54535169 | G | 0.25 | 0.2143 | A |
| 20 | BICF2P257221            | 54544731 | C | 0.5  | 0.5    | A |
| 20 | TIGRP2P275550_rs8620385 | 54573858 | A | 0.75 | 0.7857 | G |
| 20 | BICF2P256848            | 54586807 | G | 0.5  | 0.5    | C |
| 20 | TIGRP2P275575_rs8780189 | 54591074 | A | 0.5  | 0.5    | G |
| 20 | TIGRP2P275593_rs8992831 | 54622758 | A | 0.25 | 0.2857 | G |
| 20 | TIGRP2P275595_rs9110517 | 54628766 | A | 1    | 0.8    | G |
| 20 | BICF2P565776            | 54637013 | A | 0.25 | 0.2857 | G |
| 20 | TIGRP2P275620_rs8794706 | 54650115 | A | 0.25 | 0.2857 | G |
| 20 | TIGRP2P275630_rs9086856 | 54675681 | G | 0.25 | 0.2857 | C |
| 20 | TIGRP2P275640_rs9103948 | 54696261 | T | 0    | 0      | A |
| 20 | TIGRP2P275650_rs8724427 | 54712870 | A | 0.25 | 0.25   | G |
| 20 | BICF2P530772            | 54734331 | 0 | 0    | 0      | A |
| 20 | BICF2G630447581         | 54749318 | A | 0    | 0      | G |
| 20 | BICF2G630447575         | 54752781 | C | 0    | 0      | A |
| 20 | BICF2G630447551         | 54772819 | G | 0.5  | 0.3571 | A |
| 20 | BICF2S23640344          | 54779660 | G | 0.5  | 0.3571 | A |
| 20 | BICF2S23537016          | 54790454 | A | 0    | 0      | G |
| 20 | TIGRP2P275683_rs8984803 | 54805998 | A | 0    | 0      | G |
| 20 | BICF2G630447505         | 54819337 | A | 0.5  | 0.3571 | G |
| 20 | BICF2G630447495         | 54829021 | A | 0.5  | 0.3333 | G |
| 20 | BICF2S2367330           | 54845726 | 0 | 0    | 0      | G |
| 20 | TIGRP2P275699_rs9211230 | 54864375 | C | 0    | 0      | G |
| 20 | BICF2P1319451           | 54876828 | C | 0.5  | 0.6429 | G |
| 20 | BICF2P499015            | 54882300 | A | 0.25 | 0.3571 | G |

|    |                         |          |   |      |        |   |
|----|-------------------------|----------|---|------|--------|---|
| 20 | BICF2G630447492         | 54900111 | A | 0.25 | 0.2857 | G |
| 20 | BICF2G630447491         | 54904208 | A | 0.5  | 0.3571 | G |
| 20 | BICF2P1333002           | 54929758 | 0 | 0    | 0      | A |
| 20 | BICF2G630447484         | 54952351 | A | 0    | 0      | G |
| 20 | BICF2P908104            | 54974346 | 0 | 0    | 0      | A |
| 20 | TIGRP2P275721_rs9150447 | 54988758 | 0 | 0    | 0      | C |
| 20 | G1120f27S302            | 54994673 | A | 0    | 0      | G |
| 20 | BICF2S2312046           | 55029182 | A | 0.25 | 0.2857 | G |
| 20 | BICF2S2337239           | 55046419 | G | 0.25 | 0.2143 | A |
| 20 | BICF2P1049482           | 55059276 | G | 0.5  | 0.3571 | A |
| 20 | BICF2G630447427         | 55068181 | A | 0.75 | 0.6667 | G |
| 20 | BICF2G630447423         | 55074648 | A | 0.5  | 0.3571 | G |
| 20 | BICF2P431596            | 55084449 | G | 0.5  | 0.5    | A |
| 20 | BICF2P636787            | 55088947 | A | 0.25 | 0.1429 | G |
| 20 | BICF2P1226241           | 55104400 | A | 0.25 | 0.1429 | G |
| 20 | BICF2S23042151          | 55109494 | A | 0    | 0      | G |
| 20 | BICF2P189418            | 55130051 | A | 0.25 | 0.2143 | G |
| 20 | TIGRP2P275740_rs9064573 | 55133565 | A | 0.25 | 0.2143 | G |
| 20 | BICF2S23637014          | 55151454 | A | 0.5  | 0.5    | C |
| 20 | BICF2G630447402         | 55162137 | G | 1    | 1      | A |
| 20 | BICF2G630447394         | 55167264 | A | 0.75 | 0.8571 | C |
| 20 | BICF2G630447384         | 55181924 | A | 0.25 | 0.1429 | C |
| 20 | BICF2P443013            | 55196274 | A | 0    | 0      | G |
| 20 | BICF2G630447354         | 55204503 | A | 0.25 | 0.1429 | G |
| 20 | BICF2G630447341         | 55217868 | A | 0    | 0      | G |
| 20 | TIGRP2P276913_rs8530581 | 55233689 | 0 | 0    | 0      | A |
| 20 | BICF2S2361391           | 55241554 | T | 0.25 | 0.1429 | A |
| 20 | TIGRP2P276917_rs8995859 | 55251345 | A | 0.25 | 0.1429 | G |
| 20 | BICF2P602724            | 55259038 | C | 0.25 | 0.1429 | A |
| 20 | BICF2P1232277           | 55271936 | A | 0.25 | 0.1429 | G |
| 20 | BICF2P1185798           | 55277738 | A | 0.25 | 0.1429 | C |
| 20 | BICF2S23439159          | 55284756 | A | 0.25 | 0.1429 | G |
| 20 | BICF2S23714426          | 55293249 | A | 0.25 | 0.1429 | T |
| 20 | BICF2S23041856          | 55306157 | G | 0.75 | 0.8571 | A |
| 20 | TIGRP2P276933_rs8489400 | 55325578 | G | 0.25 | 0.1429 | A |
| 20 | BICF2G630447303         | 55332336 | G | 0.25 | 0.1429 | A |
| 20 | BICF2G630447295         | 55343685 | A | 0.25 | 0.1429 | G |
| 20 | BICF2G630447283         | 55352802 | A | 0.25 | 0.1429 | G |
| 20 | BICF2G630447265         | 55363899 | G | 0    | 0      | C |
| 20 | BICF2G630447259         | 55381740 | A | 0.5  | 0.4286 | G |
| 20 | BICF2G630447258         | 55387088 | A | 0.25 | 0.2857 | G |
| 20 | TIGRP2P276959_rs8635962 | 55400828 | 0 | 0    | 0      | A |
| 20 | BICF2G630447253         | 55407451 | A | 0    | 0      | G |
| 20 | BICF2P1269879           | 55413165 | G | 0.5  | 0.5714 | A |
| 20 | TIGRP2P276973_rs9189304 | 55422814 | A | 0    | 0      | G |
| 20 | BICF2G630447243         | 55438791 | G | 0.75 | 0.8571 | A |
| 20 | BICF2G630447236         | 55445312 | G | 0.75 | 0.8571 | A |

|    |                         |          |   |      |        |   |
|----|-------------------------|----------|---|------|--------|---|
| 20 | BICF2P559873            | 55460969 | 0 | 0    | 0      | C |
| 20 | BICF2P1314364           | 55480963 | A | 0.25 | 0.1429 | G |
| 20 | BICF2G630447229         | 55491544 | C | 0.5  | 0.6429 | A |
| 20 | BICF2G630447215         | 55503404 | A | 0.25 | 0.1429 | C |
| 20 | BICF2P1255245           | 55519136 | G | 0.5  | 0.3571 | A |
| 20 | TIGRP2P277000_rs8939922 | 55527650 | 0 | 0    | 0      | G |
| 20 | BICF2P713955            | 55527852 | G | 0.5  | 0.3571 | A |
| 20 | BICF2G630447187         | 55541139 | C | 1    | 1      | A |
| 20 | BICF2G630447176         | 55555525 | A | 1    | 1      | G |
| 20 | TIGRP2P277002_rs8807613 | 55563965 | A | 0.25 | 0.1429 | G |
| 20 | BICF2P522113            | 55601831 | A | 0.5  | 0.3571 | C |
| 20 | TIGRP2P277009_rs9033848 | 55603272 | A | 0.25 | 0.1429 | G |
| 20 | BICF2P671240            | 55619546 | A | 0    | 0      | G |
| 20 | BICF2S23749661          | 55628150 | A | 0.25 | 0.2143 | T |
| 20 | BICF2P1414690           | 55647380 | A | 0    | 0      | G |
| 20 | BICF2G630447159         | 55659727 | C | 0.25 | 0.2857 | A |
| 20 | BICF2G630447158         | 55663234 | G | 0.5  | 0.5    | A |
| 20 | BICF2P340935            | 55674129 | A | 0.25 | 0.2143 | G |
| 20 | BICF2P455678            | 55686788 | G | 0.5  | 0.5    | A |
| 20 | BICF2G630447144         | 55704695 | A | 0.25 | 0.2857 | G |
| 20 | BICF2P1424199           | 55717167 | G | 0.25 | 0.2857 | A |
| 20 | BICF2G630447134         | 55722677 | G | 0.25 | 0.2857 | A |
| 20 | BICF2P64337             | 55740325 | G | 0.75 | 0.6429 | A |
| 20 | BICF2S23619169          | 55743775 | G | 0.75 | 0.6429 | A |
| 20 | BICF2P44748             | 55752783 | A | 0.5  | 0.4286 | G |
| 20 | BICF2S23523523          | 55764343 | A | 0    | 0      | G |
| 20 | BICF2P662723            | 55782580 | G | 1    | 1      | A |
| 20 | BICF2G630447113         | 55796888 | A | 0    | 0      | G |
| 20 | BICF2G630447104         | 55800485 | A | 0    | 0      | G |
| 20 | BICF2G630447074         | 55815466 | G | 0.75 | 0.7143 | C |
| 20 | TIGRP2P277088_rs9188149 | 55826205 | A | 0.75 | 0.7143 | G |
| 20 | BICF2P272748            | 55834186 | A | 0.5  | 0.3571 | G |
| 20 | BICF2P1441173           | 55849145 | G | 0.25 | 0.2857 | A |
| 20 | BICF2G630447057         | 55857631 | A | 0    | 0      | G |
| 20 | BICF2G630447038         | 55869051 | G | 0    | 0      | A |
| 20 | TIGRP2P277113_rs8905631 | 55881144 | A | 0    | 0      | C |
| 20 | TIGRP2P277124_rs8498511 | 55892487 | 0 | 0    | 0      | A |
| 20 | BICF2P900996            | 55906087 | A | 0.25 | 0.3571 | G |
| 20 | TIGRP2P277140_rs8954266 | 55919462 | G | 0.25 | 0.1429 | A |
| 20 | BICF2P271247            | 55942270 | A | 0.25 | 0.2857 | G |
| 20 | BICF2S23445919          | 55949394 | C | 0    | 0      | G |
| 20 | BICF2P201437            | 55962063 | A | 0.25 | 0.1429 | G |
| 20 | BICF2S23519010          | 55985980 | A | 0    | 0      | G |
| 20 | BICF2G630447019         | 56007096 | A | 0.5  | 0.5    | G |
| 20 | BICF2G630447015         | 56019013 | G | 0.5  | 0.5    | A |
| 20 | BICF2G630447012         | 56038493 | G | 0.5  | 0.5    | A |
| 20 | BICF2G630447011         | 56042698 | G | 0.25 | 0.3571 | A |



|    |                         |          |   |      |        |   |
|----|-------------------------|----------|---|------|--------|---|
| 20 | BICF2P648211            | 56052109 | A | 0.5  | 0.5    | G |
| 20 | BICF2P624623            | 56054772 | C | 0.25 | 0.1429 | A |
| 20 | TIGRP2P277181_rs9240384 | 56071710 | G | 0.5  | 0.5    | A |
| 20 | TIGRP2P277185_rs8587666 | 56081949 | A | 0.25 | 0.1429 | G |
| 20 | BICF2S23344526          | 56086734 | A | 0.5  | 0.3571 | G |
| 20 | TIGRP2P277188_rs9128451 | 56098241 | C | 0.5  | 0.3571 | A |
| 20 | BICF2P572707            | 56130682 | G | 0.5  | 0.3571 | A |
| 20 | BICF2P1268872           | 56132935 | 0 | 0    | 0      | G |
| 20 | BICF2P599418            | 56149426 | 0 | 0    | 0      | G |
| 20 | BICF2P1281939           | 56165922 | A | 0.5  | 0.5714 | G |
| 20 | BICF2P1281945           | 56168011 | G | 0.25 | 0.2857 | A |
| 20 | BICF2S22939506          | 56181527 | G | 1    | 0.875  | A |
| 20 | BICF2G630446984         | 56194891 | T | 1    | 1      | A |
| 20 | BICF2P170866            | 56202159 | A | 0.25 | 0.2857 | G |
| 20 | BICF2S23639202          | 56214958 | 0 | 0    | 0      | G |
| 20 | BICF2P1229497           | 56242675 | A | 0.25 | 0.2857 | T |
| 20 | BICF2G630446927         | 56248683 | G | 0.25 | 0.2857 | A |
| 20 | BICF2G630446911         | 56259357 | G | 0.25 | 0.2857 | A |
| 20 | BICF2G630446820         | 56281542 | G | 0.25 | 0.2857 | A |
| 20 | BICF2G630446806         | 56293878 | A | 0.25 | 0.2857 | C |
| 20 | BICF2G630446795         | 56309668 | G | 0.25 | 0.2857 | A |
| 20 | BICF2G630446790         | 56318417 | C | 0    | 0      | A |
| 20 | BICF2G630446773         | 56330313 | A | 0.25 | 0.2857 | G |
| 20 | BICF2G630446752         | 56348892 | A | 0.25 | 0.2857 | C |
| 20 | BICF2G630446744         | 56358543 | A | 0.25 | 0.2857 | G |
| 20 | BICF2G630446736         | 56364010 | A | 0.25 | 0.2857 | G |
| 20 | TIGRP2P277305_rs9251021 | 56374468 | 0 | 0    | 0      | A |
| 20 | TIGRP2P277317_rs8911331 | 56401002 | 0 | 0    | 0      | C |
| 20 | BICF2G630446654         | 56407668 | G | 0.75 | 0.6429 | A |
| 20 | BICF2G630446641         | 56430269 | A | 0.25 | 0.3571 | G |
| 20 | BICF2G630446639         | 56431839 | A | 0.25 | 0.3571 | G |
| 20 | BICF2G630446634         | 56446057 | A | 0.75 | 0.6429 | G |
| 20 | BICF2P169648            | 56461358 | G | 0    | 0      | A |
| 20 | TIGRP2P277321_rs8840160 | 56475408 | A | 0    | 0      | G |
| 20 | TIGRP2P277323_rs8975417 | 56480451 | A | 0    | 0      | G |
| 20 | BICF2P1329036           | 56494364 | G | 0.25 | 0.3571 | A |
| 20 | BICF2S23210616          | 56506315 | A | 0.75 | 0.7143 | G |
| 20 | TIGRP2P277328_rs8665693 | 56511117 | 0 | 0    | 0      | C |
| 20 | BICF2G630446600         | 56523591 | A | 0.25 | 0.3571 | G |
| 20 | BICF2G630446591         | 56542081 | A | 0.25 | 0.3571 | G |
| 20 | BICF2G630446590         | 56546680 | G | 0.25 | 0.3571 | A |
| 20 | BICF2G630446586         | 56558493 | G | 0    | 0      | A |
| 20 | BICF2G630446581         | 56580677 | A | 0.5  | 0.3571 | T |
| 20 | BICF2G630446563         | 56600979 | C | 0    | 0      | A |
| 20 | BICF2G630446546         | 56613338 | G | 0.5  | 0.3333 | A |
| 20 | BICF2P1323257           | 56619476 | A | 0.25 | 0.2857 | G |
| 20 | BICF2G630446527         | 56632700 | A | 0.5  | 0.3571 | G |

|    |                         |          |   |      |        |   |
|----|-------------------------|----------|---|------|--------|---|
| 20 | BICF2G630446516         | 56655225 | A | 0    | 0      | G |
| 20 | BICF2P1121454           | 56660884 | A | 0.5  | 0.3571 | G |
| 20 | BICF2P1121455           | 56661761 | G | 0.5  | 0.3571 | C |
| 20 | TIGRP2P277360_rs9073439 | 56673307 | A | 0    | 0      | G |
| 20 | BICF2G630446505         | 56692166 | A | 0.25 | 0.3571 | G |
| 20 | BICF2G630446504         | 56693073 | C | 0.25 | 0.3571 | A |
| 20 | BICF2P1366597           | 56703031 | A | 0.25 | 0.3571 | C |
| 20 | BICF2G630446492         | 56711499 | A | 0.25 | 0.3571 | G |
| 20 | BICF2G630446487         | 56718735 | A | 0.75 | 0.6429 | G |
| 20 | BICF2G630446481         | 56736007 | G | 0    | 0      | C |
| 20 | TIGRP2P277396_rs8995831 | 56746186 | A | 0.25 | 0.2857 | G |
| 20 | BICF2G630446475         | 56761374 | A | 0    | 0      | G |
| 20 | TIGRP2P277410_rs9040884 | 56774021 | 0 | 0    | 0      | C |
| 20 | BICF2P1171991           | 56776290 | 0 | 0    | 0      | A |
| 20 | BICF2G630446465         | 56793137 | A | 0    | 0      | G |
| 20 | BICF2G630446462         | 56801757 | G | 0    | 0      | A |
| 20 | BICF2G630446442         | 56813709 | A | 0    | 0      | G |
| 20 | BICF2G630446430         | 56828286 | A | 0    | 0      | G |
| 20 | BICF2G630446427         | 56837797 | A | 0    | 0      | C |
| 20 | BICF2P884598            | 56854076 | A | 0    | 0      | G |
| 20 | BICF2G630446416         | 56866534 | G | 0.25 | 0.2857 | A |
| 20 | BICF2P609833            | 56891612 | A | 0    | 0      | G |
| 20 | BICF2P75306             | 56912304 | A | 0    | 0      | G |
| 20 | TIGRP2P277492_rs8762952 | 56928717 | A | 0    | 0      | C |
| 20 | BICF2S23611212          | 56942407 | G | 0    | 0      | C |
| 20 | BICF2G630446413         | 56959445 | A | 0    | 0      | T |
| 20 | TIGRP2P277495_rs9098118 | 56962695 | 0 | 0    | 0      | G |
| 20 | TIGRP2P277496_rs9167999 | 56972814 | 0 | 0    | 0      | A |
| 20 | BICF2G630446401         | 57000272 | 0 | 0    | 0      | G |
| 20 | BICF2G630446349         | 57013905 | 0 | 0    | 0      | A |
| 20 | BICF2G630446326         | 57023527 | 0 | 0    | 0      | G |
| 20 | BICF2G630446325         | 57024075 | A | 0    | 0      | G |
| 20 | BICF2G630446317         | 57029668 | 0 | 0    | 0      | G |
| 20 | BICF2G630446290         | 57049382 | 0 | 0    | 0      | G |
| 20 | BICF2G630446285         | 57050754 | G | 0    | 0      | A |
| 20 | BICF2G630446267         | 57054503 | 0 | 0    | 0      | A |
| 20 | BICF2P1216727           | 57072749 | G | 0.75 | 0.7143 | A |
| 20 | BICF2P489887            | 57085278 | A | 0.75 | 0.7143 | C |
| 20 | BICF2P388649            | 57090811 | A | 0.75 | 0.7143 | G |
| 20 | BICF2P328986            | 57099581 | G | 1    | 0.7143 | A |
| 20 | BICF2P812496            | 57106871 | G | 0.75 | 0.7143 | A |
| 20 | BICF2P244070            | 57115583 | A | 0.75 | 0.7143 | G |
| 20 | TIGRP2P277505_rs9216205 | 57131439 | A | 1    | 1      | G |
| 20 | TIGRP2P277507_rs8618697 | 57138483 | A | 1    | 1      | G |
| 20 | TIGRP2P277514_rs8849357 | 57149007 | A | 0    | 0      | C |
| 20 | BICF2P1030664           | 57189671 | G | 0    | 0      | A |
| 20 | BICF2P455559            | 57191585 | G | 0    | 0      | A |

|    |                         |          |   |      |        |   |
|----|-------------------------|----------|---|------|--------|---|
| 20 | BICF2G630446165         | 57203930 | G | 0    | 0      | A |
| 20 | BICF2G630446151         | 57214673 | G | 0    | 0      | A |
| 20 | BICF2G630446132         | 57233492 | G | 0    | 0      | A |
| 20 | BICF2P979766            | 57241438 | A | 0    | 0      | G |
| 20 | TIGRP2P277615_rs9220162 | 57254381 | C | 0    | 0      | A |
| 20 | BICF2G630446119         | 57264475 | A | 0    | 0      | G |
| 20 | BICF2G630446110         | 57270532 | C | 0.5  | 0.3571 | A |
| 20 | BICF2P765622            | 57290330 | C | 0    | 0      | G |
| 20 | BICF2P942342            | 57295396 | A | 0    | 0      | C |
| 20 | BICF2G630446098         | 57295704 | A | 0    | 0      | C |
| 20 | BICF2G630446095         | 57302755 | A | 0    | 0      | G |
| 20 | BICF2S23058207          | 57319839 | A | 0    | 0      | C |
| 20 | BICF2S23719471          | 57332954 | G | 0.5  | 0.6429 | A |
| 20 | BICF2S22925833          | 57347823 | A | 0.5  | 0.6429 | G |
| 20 | BICF2S23249626          | 57351535 | G | 0.5  | 0.6429 | C |
| 20 | BICF2S23057231          | 57355339 | G | 0.5  | 0.6429 | A |
| 20 | TIGRP2P277685_rs8889406 | 57370736 | A | 0.5  | 0.6429 | G |
| 20 | TIGRP2P277692_rs8748719 | 57378483 | A | 0    | 0      | G |
| 20 | BICF2G630446069         | 57393076 | A | 0    | 0      | G |
| 20 | BICF2S23625869          | 57404672 | A | 0.75 | 0.7143 | G |
| 20 | BICF2G630446049         | 57412798 | A | 0.25 | 0.2857 | G |
| 20 | BICF2G630446027         | 57421138 | G | 0.75 | 0.7143 | A |
| 20 | BICF2P376113            | 57437548 | A | 0    | 0      | G |
| 20 | BICF2G630446004         | 57446420 | G | 0    | 0      | A |
| 20 | TIGRP2P277727_rs8624153 | 57457420 | G | 0    | 0      | A |
| 20 | BICF2G630445990         | 57481259 | A | 0    | 0      | G |
| 20 | BICF2G630445980         | 57498366 | A | 0    | 0      | C |
| 20 | BICF2G630445971         | 57508044 | 0 | 0    | 0      | G |
| 20 | BICF2G630445957         | 57517569 | A | 0.25 | 0.2857 | G |
| 20 | BICF2G630445948         | 57524628 | 0 | 0    | 0      | A |
| 20 | BICF2G630445938         | 57535902 | A | 0.75 | 0.7143 | G |
| 20 | BICF2P1239397           | 57556454 | 0 | 0    | 0      | C |
| 20 | BICF2G630445936         | 57561788 | G | 0    | 0      | A |
| 20 | BICF2G630445927         | 57570317 | C | 0    | 0      | A |
| 20 | BICF2P682683            | 57586137 | G | 0    | 0      | A |
| 20 | BICF2P1360339           | 57591988 | G | 0    | 0      | A |
| 20 | BICF2P1360338           | 57592116 | G | 0    | 0      | A |
| 20 | BICF2G630445922         | 57593910 | C | 0    | 0      | A |
| 20 | BICF2P511234            | 57604538 | G | 0    | 0      | A |
| 20 | BICF2P177164            | 57621437 | A | 0    | 0      | G |
| 20 | BICF2P391825            | 57637757 | A | 0.25 | 0.2857 | G |
| 20 | BICF2G630445897         | 57646092 | C | 0    | 0      | A |
| 20 | BICF2G630445892         | 57652749 | 0 | 0    | 0      | G |
| 20 | BICF2S22941815          | 57669881 | G | 0.25 | 0.2857 | A |
| 20 | BICF2P767152            | 57678388 | 0 | 0    | 0      | C |
| 20 | TIGRP2P277789_rs8868988 | 57693471 | A | 0.25 | 0.2857 | G |
| 20 | BICF2P1373679           | 57697982 | A | 0.25 | 0.2857 | G |

|    |                         |          |   |      |        |   |
|----|-------------------------|----------|---|------|--------|---|
| 20 | BICF2G630445888         | 57711417 | 0 | 0    | 0      | G |
| 20 | BICF2P294531            | 57720444 | G | 0.25 | 0.2857 | C |
| 20 | TIGRP2P277801_rs8660894 | 57739836 | A | 0    | 0      | G |
| 20 | BICF2G630445882         | 57743787 | A | 0    | 0      | G |
| 20 | BICF2G630445879         | 57754428 | G | 1    | 1      | A |
| 20 | BICF2G630445876         | 57764949 | 0 | 0    | 0      | T |
| 20 | BICF2G630445866         | 57782036 | 0 | 0    | 0      | C |
| 20 | BICF2P679268            | 57791376 | A | 0    | 0      | G |
| 20 | BICF2G630445864         | 57804915 | A | 0    | 0      | G |
| 20 | BICF2G630445863         | 57811578 | 0 | 0    | 0      | A |
| 20 | BICF2P179493            | 57841992 | 0 | 0    | 0      | G |
| 20 | BICF2P65592             | 57864962 | A | 0    | 0      | G |
| 20 | TIGRP2P277837_rs8559213 | 57878099 | 0 | 0    | 0      | G |
| 20 | BICF2G630445858         | 57883519 | C | 0    | 0      | G |
| 20 | TIGRP2P277840_rs8675579 | 57894637 | G | 1    | 0.7143 | A |
| 20 | BICF2G630445857         | 57903788 | 0 | 0    | 0      | G |
| 20 | BICF2G630445833         | 57921256 | 0 | 0    | 0      | G |
| 20 | BICF2P491903            | 57927619 | G | 0.25 | 0.2857 | A |
| 20 | BICF2G630445810         | 57937732 | A | 0.25 | 0.2857 | C |
| 20 | BICF2G630445793         | 57942906 | A | 0.25 | 0.2857 | G |
| 20 | BICF2P1262210           | 57959682 | A | 0    | 0      | G |
| 20 | BICF2P1348261           | 57961332 | G | 0.25 | 0.2857 | A |
| 20 | BICF2P803550            | 57973396 | A | 0    | 0.2    | G |
| 20 | BICF2P215075            | 57986575 | C | 0    | 0      | G |
| 20 | BICF2P1333048           | 57992139 | G | 1    | 1      | A |
| 20 | BICF2G630445747         | 58003329 | A | 0.75 | 0.7143 | G |
| 20 | BICF2G630445724         | 58013760 | A | 0.75 | 0.7143 | G |
| 20 | BICF2G630445719         | 58025078 | A | 1    | 1      | C |
| 20 | BICF2P62810             | 58032506 | A | 0    | 0      | G |
| 20 | BICF2P478991            | 58047020 | A | 0    | 0      | G |
| 20 | TIGRP2P277905_rs8998341 | 58054598 | A | 0    | 0      | C |
| 20 | TIGRP2P277909_rs8613347 | 58069037 | A | 0    | 0      | G |
| 20 | BICF2P540611            | 58078557 | A | 0    | 0      | G |
| 20 | BICF2P1177174           | 58097235 | A | 0    | 0      | C |
| 20 | BICF2G630445684         | 58098518 | G | 0.5  | 0.4286 | A |
| 20 | BICF2P899906            | 58111979 | G | 0.5  | 0.3571 | A |
| 20 | BICF2P477002            | 58132502 | G | 0.75 | 0.8571 | A |
| 20 | TIGRP2P277953_rs8891693 | 58149059 | G | 0    | 0      | A |
| 20 | BICF2P1451605           | 58160533 | C | 0    | 0      | A |
| 20 | BICF2P1361417           | 58168199 | A | 0.5  | 0.6429 | G |
| 20 | BICF2G630445655         | 58185147 | 0 | 0    | 0      | A |
| 20 | BICF2G630445638         | 58199180 | 0 | 0    | 0      | T |
| 20 | BICF2G630445634         | 58205441 | G | 0.5  | 0.6429 | A |
| 20 | BICF2G630445632         | 58213469 | 0 | 0    | 0      | G |
| 20 | BICF2S23113750          | 58228670 | A | 0.5  | 0.5    | G |
| 20 | BICF2P675990            | 58237305 | C | 0.5  | 0.5    | A |
| 20 | BICF2G630445626         | 58241646 | 0 | 0    | 0      | G |

|    |                         |          |   |      |        |   |
|----|-------------------------|----------|---|------|--------|---|
| 20 | BICF2P464211            | 58243991 | A | 0.25 | 0.1429 | G |
| 20 | TIGRP2P277991_rs8870031 | 58249763 | G | 0.75 | 0.8571 | A |
| 20 | TIGRP2P277997_rs8810642 | 58261643 | A | 0.25 | 0.2857 | G |
| 20 | BICF2G630445623         | 58272322 | A | 0.25 | 0.1429 | G |
| 20 | BICF2G630445609         | 58285017 | A | 0.25 | 0.2857 | G |
| 20 | BICF2G630445597         | 58303044 | A | 0    | 0      | G |
| 20 | BICF2S23541848          | 58311749 | G | 0.5  | 0.3571 | A |
| 20 | BICF2G630445581         | 58316892 | G | 0.5  | 0.6429 | A |
| 20 | BICF2G630445550         | 58338384 | A | 1    | 1      | G |
| 20 | BICF2G630445548         | 58342388 | A | 0.25 | 0.2143 | G |
| 20 | BICF2P358405            | 58356150 | A | 0    | 0      | G |
| 20 | BICF2P230138            | 58370972 | A | 0    | 0      | G |
| 20 | BICF2G630445541         | 58375288 | A | 0    | 0      | G |
| 20 | BICF2G630445527         | 58384879 | A | 0    | 0      | C |
| 20 | BICF2G630445524         | 58387870 | C | 0.25 | 0.2143 | A |
| 20 | BICF2G630445506         | 58407234 | T | 0    | 0      | A |
| 20 | BICF2P273121            | 58425931 | A | 0.25 | 0.1429 | G |
| 20 | BICF2G630445500         | 58444331 | G | 0    | 0      | A |
| 20 | BICF2P293043            | 58456550 | A | 0    | 0      | G |
| 20 | BICF2S23526418          | 58470782 | A | 0    | 0      | T |
| 20 | BICF2P613282            | 58497917 | G | 0.25 | 0.2143 | A |
| 20 | BICF2P864831            | 58505391 | A | 0.75 | 0.7857 | T |
| 20 | BICF2P369518            | 58518318 | C | 0.5  | 0.5    | A |
| 20 | BICF2G630445467         | 58526944 | C | 0.25 | 0.2143 | G |
| 20 | BICF2P853599            | 58655807 | G | 0.5  | 0.5714 | A |
| 20 | BICF2G630445458         | 58661571 | G | 0.5  | 0.5    | A |
| 20 | BICF2G630445437         | 58675407 | A | 0.25 | 0.2143 | G |
| 20 | BICF2P1342156           | 58679681 | A | 0    | 0      | G |
| 20 | BICF2G630445416         | 58685961 | A | 0.25 | 0.2143 | G |
| 20 | BICF2G630445375         | 58701672 | G | 0.75 | 0.7857 | A |
| 20 | BICF2S23636929          | 58718133 | G | 0    | 0      | A |
| 20 | TIGRP2P278052_rs8588937 | 58725958 | A | 0.75 | 0.7143 | G |
| 20 | TIGRP2P278055_rs8819835 | 58730674 | A | 0.75 | 0.7143 | G |
| 20 | BICF2P566424            | 58748712 | A | 0.25 | 0.2143 | G |
| 20 | BICF2P12755             | 58754305 | A | 0.25 | 0.2143 | G |
| 20 | BICF2G630445348         | 58787813 | G | 0.25 | 0.2857 | A |
| 20 | BICF2G630445339         | 58794568 | A | 0.25 | 0.2857 | C |
| 20 | BICF2P1260292           | 58808200 | A | 0.25 | 0.2143 | G |
| 20 | BICF2G630445315         | 58817116 | A | 0.5  | 0.5    | G |
| 20 | BICF2G630445269         | 58828608 | G | 0.75 | 0.7857 | A |
| 20 | BICF2G630445265         | 58836520 | C | 0    | 0      | G |
| 20 | BICF2G630445249         | 58855989 | A | 0    | 0      | G |
| 20 | BICF2G630445242         | 58866386 | A | 0    | 0      | G |
| 20 | BICF2P457422            | 58869196 | G | 1    | 0.4286 | A |
| 20 | BICF2P447272            | 58888094 | A | 0    | 0      | G |
| 20 | BICF2S23246333          | 58894032 | A | 0    | 0      | G |
| 20 | BICF2P1042814           | 58903755 | A | 0.25 | 0.2143 | T |

|    |                         |          |   |      |        |   |
|----|-------------------------|----------|---|------|--------|---|
| 20 | BICF2P828524            | 58914771 | A | 0.25 | 0.2857 | G |
| 20 | BICF2P212731            | 58933886 | A | 0    | 0      | G |
| 20 | BICF2P854772            | 58939023 | A | 0.5  | 0.5    | C |
| 20 | BICF2P883095            | 58960228 | C | 0.5  | 0.5714 | G |
| 20 | BICF2P1351812           | 58961259 | A | 0    | 0      | G |
| 20 | TIGRP2P278109_rs8917987 | 58974749 | A | 0.5  | 0.5714 | G |
| 20 | TIGRP2P278113_rs9012035 | 58984880 | 0 | 0    | 0      | C |
| 20 | BICF2P1211529           | 58997226 | G | 0.5  | 0.5    | A |
| 20 | BICF2P577678            | 59017984 | A | 0.5  | 0.4286 | G |
| 20 | BICF2P1328442           | 59026692 | A | 0.25 | 0.1667 | G |
| 20 | BICF2P250274            | 59031506 | G | 0.25 | 0.2143 | A |
| 20 | BICF2P1379351           | 59046711 | 0 | 0    | 0      | C |
| 20 | BICF2S2362978           | 59056731 | T | 0.25 | 0.2143 | A |
| 20 | BICF2P204406            | 59082847 | G | 0    | 0      | A |
| 20 | BICF2P1376782           | 59087698 | G | 0    | 0      | A |
| 20 | TIGRP2P278124_rs8681588 | 59103702 | G | 0.25 | 0.2857 | A |
| 20 | BICF2P705827            | 59115257 | G | 0    | 0      | A |
| 20 | BICF2S23230012          | 59125376 | A | 0    | 0.1    | G |
| 20 | BICF2P841344            | 59135181 | G | 0.5  | 0.5    | A |
| 20 | BICF2P348219            | 59139353 | A | 0    | 0      | G |
| 20 | BICF2S23038708          | 59147721 | A | 0.5  | 0.5    | G |
| 20 | BICF2P375075            | 59158219 | 0 | 0    | 0      | G |
| 20 | BICF2P404622            | 59172500 | G | 0    | 0      | A |
| 20 | TIGRP2P278138_rs9076073 | 59210271 | A | 0.25 | 0.2143 | G |
| 20 | BICF2P421851            | 59210637 | A | 0.25 | 0.2857 | G |
| 20 | BICF2P929714            | 59218609 | G | 0    | 0      | A |
| 20 | TIGRP2P278149_rs8979500 | 59235882 | A | 1    | 1      | G |
| 20 | TIGRP2P278151_rs8909879 | 59236760 | G | 0    | 0      | A |
| 20 | TIGRP2P278166_rs8939084 | 59248714 | A | 0.75 | 0.7143 | G |
| 20 | BICF2P292622            | 59264248 | 0 | 0    | 0      | C |
| 20 | TIGRP2P278196_rs8765527 | 59282791 | 0 | 0    | 0      | G |
| 20 | BICF2S23224390          | 59296106 | A | 0.75 | 0.7143 | G |
| 20 | BICF2S23725828          | 59312117 | A | 0    | 0      | G |
| 20 | BICF2P1022814           | 59324449 | A | 0.75 | 0.7143 | G |
| 20 | BICF2P1472718           | 59337811 | G | 0.25 | 0.2    | A |
| 20 | BICF2P1034936           | 59340305 | A | 0.25 | 0.2857 | G |
| 20 | BICF2P1328313           | 59352555 | A | 0.5  | 0.5833 | G |
| 20 | BICF2S23254563          | 59366732 | A | 0.25 | 0.2857 | C |
| 20 | BICF2S23058230          | 59385120 | A | 0.25 | 0.2857 | G |
| 20 | BICF2P113598            | 59388176 | A | 0.25 | 0.2857 | G |
| 20 | BICF2P1141485           | 59420452 | G | 0.5  | 0.5    | A |
| 20 | BICF2P1109624           | 59424438 | A | 0.25 | 0.2857 | G |
| 20 | BICF2P393253            | 59434325 | T | 0.75 | 0.7143 | A |
| 20 | TIGRP2P278295_rs8789909 | 59450694 | A | 0.25 | 0.2857 | C |
| 20 | BICF2S23121873          | 59457139 | A | 0    | 0      | C |
| 20 | BICF2S23094             | 59466500 | A | 0.25 | 0.2143 | G |
| 20 | BICF2P822204            | 59487265 | A | 0.25 | 0.2857 | G |

|    |                         |          |   |      |        |   |
|----|-------------------------|----------|---|------|--------|---|
| 20 | BICF2P1309051           | 59492952 | G | 0    | 0      | A |
| 20 | BICF2P1337000           | 59506729 | C | 0    | 0      | A |
| 20 | BICF2P465107            | 59523213 | A | 0.5  | 0.4286 | G |
| 20 | BICF2P82795             | 59529812 | A | 0    | 0      | G |
| 20 | BICF2P110675            | 59541312 | A | 0.25 | 0.2857 | G |
| 20 | BICF2P1427364           | 59555976 | G | 0.25 | 0.2143 | A |
| 20 | TIGRP2P278316_rs9174537 | 59565004 | G | 0.25 | 0.2143 | A |
| 20 | TIGRP2P278320_rs8624419 | 59571188 | G | 0.25 | 0.1    | A |
| 20 | TIGRP2P278343_rs9247461 | 59586387 | A | 0.25 | 0.2143 | G |
| 20 | BICF2P314184            | 59606712 | 0 | 0    | 0      | C |
| 20 | BICF2P866985            | 59623914 | G | 0.5  | 0.5    | A |
| 20 | BICF2P1068997           | 59634422 | G | 0.75 | 0.7857 | A |
| 20 | BICF2P667099            | 59639978 | A | 0.5  | 0.5    | G |
| 20 | BICF2P568985            | 59659225 | A | 0    | 0      | G |
| 20 | BICF2P1458451           | 59672886 | 0 | 0    | 0      | C |
| 20 | BICF2S23149954          | 59674180 | A | 0    | 0      | G |
| 20 | BICF2P1232443           | 59690164 | A | 0    | 0      | G |
| 20 | BICF2P164888            | 59713448 | 0 | 0    | 0      | G |
| 20 | BICF2P1385995           | 59721353 | A | 0    | 0      | G |
| 20 | BICF2P968510            | 59740643 | A | 0    | 0      | G |
| 20 | BICF2P806422            | 59747789 | G | 0.5  | 0.5    | A |
| 20 | BICF2P85586             | 59766075 | A | 0.25 | 0.2143 | G |
| 20 | BICF2S23743029          | 59784563 | A | 0.25 | 0.2143 | G |
| 20 | BICF2S24116047          | 59789432 | 0 | 0    | 0      | G |
| 20 | BICF2P569008            | 59801962 | G | 0.25 | 0.2857 | A |
| 20 | BICF2P331357            | 59844869 | A | 0.25 | 0.2857 | G |
| 20 | BICF2P800979            | 59854526 | 0 | 0    | 0      | C |
| 20 | BICF2P634112            | 59864978 | A | 0.25 | 0.2143 | G |
| 20 | BICF2P169594            | 59876168 | 0 | 0    | 0      | C |
| 20 | BICF2P881627            | 59889295 | A | 0    | 0      | G |
| 20 | BICF2P1194318           | 59893721 | G | 0    | 0      | A |
| 20 | BICF2P161217            | 59910832 | 0 | 0    | 0      | G |
| 20 | BICF2P1209819           | 59915240 | G | 0.75 | 0.7143 | A |
| 20 | BICF2P134773            | 59937195 | 0 | 0    | 0      | T |
| 20 | BICF2P291736            | 59942652 | 0 | 0    | 0      | C |
| 20 | BICF2P1364134           | 59964533 | A | 0.25 | 0.2857 | G |
| 20 | BICF2P1064441           | 59981118 | 0 | 0    | 0      | A |
| 20 | BICF2P309719            | 60006835 | A | 0    | 0      | G |
| 20 | BICF2P1054322           | 60007374 | 0 | 0    | 0      | A |
| 20 | BICF2P573969            | 60051973 | 0 | 0    | 0      | G |
| 20 | TIGRP2P278396_rs9214492 | 60054910 | 0 | 0    | 0      | C |
| 20 | BICF2P564801            | 60066935 | 0 | 0    | 0      | C |
| 20 | TIGRP2P278397_rs8952801 | 60079460 | G | 0.5  | 0.5    | A |
| 20 | BICF2P108587            | 60088188 | G | 0.5  | 0.5    | A |
| 20 | BICF2P656554            | 60091720 | A | 0.25 | 0.2143 | G |
| 20 | BICF2P1108618           | 60093280 | A | 0.25 | 0.2143 | C |
| 20 | BICF2P1081195           | 60110171 | G | 0.25 | 0.2857 | A |

|    |                         |          |   |      |        |   |
|----|-------------------------|----------|---|------|--------|---|
| 20 | BICF2P1418602           | 60118786 | G | 0    | 0      | A |
| 20 | BICF2P1189659           | 60127771 | G | 0.5  | 0.5    | A |
| 20 | BICF2P1191608           | 60141298 | G | 0.5  | 0.5    | A |
| 20 | BICF2P921586            | 60148720 | G | 0.5  | 0.5    | A |
| 20 | TIGRP2P278452_rs9233216 | 60161779 | A | 0.75 | 0.7857 | G |
| 20 | BICF2P160508            | 60174608 | G | 0.5  | 0.5    | A |
| 20 | BICF2S23148775          | 60195033 | A | 0.25 | 0.2857 | G |
| 20 | BICF2P251800            | 60203009 | A | 0.5  | 0.5    | G |
| 20 | BICF2P330882            | 60222404 | 0 | 0    | 0      | G |
| 20 | BICF2P1091353           | 60234574 | A | 0.25 | 0.2143 | G |
| 20 | TIGRP2P278490_rs8765982 | 60244094 | 0 | 0    | 0      | C |
| 20 | BICF2P989917            | 60250096 | G | 0.5  | 0.5    | A |
| 20 | BICF2P306889            | 60265166 | C | 0.5  | 0.5    | A |
| 20 | BICF2P1291146           | 60271926 | A | 0.25 | 0.2143 | G |
| 20 | TIGRP2P278494_rs8977808 | 60283084 | A | 0    | 0      | G |
| 20 | BICF2P337734            | 60302008 | 0 | 0    | 0      | G |
| 20 | TIGRP2P278501_rs8774392 | 60308102 | G | 0    | 0      | A |
| 20 | BICF2P808157            | 60320307 | 0 | 0    | 0      | C |
| 20 | TIGRP2P278514_rs8821753 | 60336245 | G | 0    | 0      | A |
| 20 | BICF2P583831            | 60349769 | 0 | 0    | 0      | G |
| 20 | BICF2G630445231         | 60358376 | A | 0.75 | 0.7857 | G |
| 20 | TIGRP2P278524_rs8641422 | 60366529 | G | 0.75 | 0.7857 | A |
| 20 | BICF2G630445226         | 60376823 | G | 0.75 | 0.7857 | A |
| 20 | BICF2P1329605           | 60387603 | A | 0    | 0      | G |
| 20 | BICF2G630445212         | 60402511 | A | 0.5  | 0.5    | G |
| 20 | BICF2P231385            | 60413233 | A | 0    | 0      | G |
| 20 | BICF2P111889            | 60458508 | 0 | 0    | 0      | C |
| 20 | BICF2P293129            | 60476677 | A | 0.25 | 0.125  | C |
| 20 | BICF2P1011845           | 60482985 | 0 | 0    | 0      | C |
| 20 | BICF2P110977            | 60511506 | G | 0    | 0      | A |
| 20 | BICF2G630445207         | 60528099 | A | 0    | 0      | C |
| 20 | BICF2G630445206         | 60537366 | A | 0.25 | 0.2857 | G |
| 20 | BICF2G630445205         | 60553291 | A | 0    | 0      | G |
| 20 | BICF2G630445200         | 60560330 | A | 0    | 0      | G |
| 20 | BICF2G630445183         | 60579613 | A | 0.75 | 0.7143 | G |
| 20 | BICF2G630445176         | 60585687 | A | 0    | 0      | G |
| 20 | BICF2P696292            | 60599042 | A | 0    | 0      | G |
| 20 | BICF2P287740            | 60605897 | A | 0    | 0      | G |
| 20 | BICF2G630445161         | 60617434 | 0 | 0    | 0      | G |
| 20 | BICF2G630445151         | 60648142 | A | 1    | 1      | C |
| 20 | TIGRP2P278607_rs9182601 | 60653169 | 0 | 0    | 0      | G |
| 20 | BICF2G630445141         | 60663794 | A | 0.25 | 0.2857 | G |
| 20 | BICF2P284566            | 60675310 | A | 0    | 0      | G |
| 20 | BICF2G630445131         | 60691397 | T | 0.25 | 0.2857 | A |
| 20 | BICF2G630445129         | 60702343 | 0 | 0    | 0      | G |
| 20 | BICF2G630445126         | 60715564 | 0 | 0    | 0      | G |
| 20 | BICF2G630445115         | 60726308 | A | 0    | 0      | G |



|    |                         |          |   |      |        |   |
|----|-------------------------|----------|---|------|--------|---|
| 20 | BICF2G630445097         | 60733663 | A | 1    | 1      | G |
| 20 | BICF2G630445084         | 60750453 | A | 0    | 0      | G |
| 20 | TIGRP2P278627_rs9065714 | 60761709 | A | 0    | 0      | G |
| 20 | BICF2S23630337          | 60771801 | C | 0.25 | 0.2857 | A |
| 20 | BICF2P207674            | 60786787 | 0 | 0    | 0      | G |
| 20 | BICF2G630445054         | 60794761 | G | 0    | 0      | A |
| 20 | BICF2S2351898           | 60811293 | A | 0    | 0      | G |
| 20 | BICF2S2352077           | 60815610 | G | 0    | 0      | A |
| 20 | BICF2G630445010         | 60834167 | G | 0.75 | 0.7857 | A |
| 20 | BICF2G630445003         | 60837695 | C | 0    | 0      | G |
| 20 | BICF2G630444994         | 60852245 | A | 0.75 | 0.7857 | G |
| 20 | BICF2G630444971         | 60875206 | A | 0.5  | 0.5    | G |
| 20 | BICF2S23654627          | 60883387 | A | 0.25 | 0.2143 | G |
| 20 | BICF2G630444946         | 60899582 | A | 0.25 | 0.2143 | G |
| 20 | BICF2P310713            | 60906617 | A | 0.75 | 0.7857 | G |
| 20 | BICF2S2371726           | 60920331 | A | 0.25 | 0.2143 | G |
| 20 | BICF2P1273676           | 60934348 | A | 0    | 0      | G |
| 20 | BICF2P1316344           | 60941508 | A | 0.75 | 0.7143 | G |
| 20 | BICF2G630444931         | 60956530 | A | 0    | 0      | G |
| 20 | BICF2G630444924         | 60975911 | C | 0    | 0      | A |
| 20 | BICF2G630444904         | 61008792 | G | 0.75 | 0.7143 | A |
| 20 | TIGRP2P278706_rs8585025 | 61020974 | 0 | 0    | 0      | C |
| 20 | BICF2P1018044           | 61032649 | A | 0    | 0      | G |
| 20 | BICF2G630444894         | 61049224 | A | 0    | 0      | G |
| 20 | BICF2P462132            | 61067911 | G | 0.5  | 0.5    | A |
| 20 | BICF2P465726            | 61093365 | 0 | 0    | 0      | C |
| 20 | TIGRP2P278714_rs9034210 | 61107894 | A | 0    | 0      | G |
| 20 | BICF2P854444            | 61117265 | A | 0    | 0      | G |
| 20 | BICF2P306813            | 61128041 | G | 0    | 0      | A |
| 20 | BICF2P1193572           | 61138968 | G | 0    | 0      | A |
| 20 | BICF2P132237            | 61145587 | A | 0.5  | 0.5    | C |
| 20 | BICF2P429018            | 61158593 | A | 0.25 | 0.2857 | G |
| 20 | BICF2P1183298           | 61161760 | A | 0.25 | 0.2143 | G |
| 20 | BICF2P360101            | 61169016 | G | 0.75 | 0.7143 | A |
| 20 | BICF2P286756            | 61180361 | A | 0    | 0      | G |
| 20 | BICF2P970167            | 61200900 | G | 0.5  | 0.5    | A |
| 20 | BICF2G630444860         | 61209584 | A | 0    | 0      | G |
| 20 | TIGRP2P278737_rs9091143 | 61224621 | A | 0    | 0      | G |
| 20 | BICF2G630444827         | 61227618 | G | 0.5  | 0.5    | A |
| 20 | BICF2G630444806         | 61246656 | C | 0.5  | 0.5    | A |
| 20 | BICF2G630444798         | 61250214 | C | 0.5  | 0.5    | A |
| 20 | BICF2G630444785         | 61261658 | G | 0    | 0      | A |
| 23 | BICF2P653617            | 3007319  | 0 | 0    | 0      | A |
| 23 | BICF2G630393647         | 3053724  | A | 1    | 0.5    | C |
| 23 | BICF2P1437156           | 3062512  | 0 | 0    | 0      | G |
| 23 | G1213f27S66             | 3078655  | A | 0    | 0      | G |
| 23 | BICF2P251536            | 3102971  | G | 0    | 0      | A |

|    |                         |         |   |    |        |   |
|----|-------------------------|---------|---|----|--------|---|
| 23 | BICF2P108339            | 3149567 | 0 | 0  | 0      | A |
| 23 | BICF2G630393640         | 3174142 | A | 0  | 0.5714 | G |
| 23 | BICF2P1147902           | 3200479 | 0 | 0  | 0      | A |
| 23 | TIGRP2P298867_rs8930556 | 3210004 | A | 0  | 0      | G |
| 23 | BICF2G630393637         | 3239500 | A | 0  | 0.5714 | T |
| 23 | G1214f43S215            | 3278958 | A | 0  | 0      | G |
| 23 | BICF2G630393634         | 3320546 | A | 1  | 0.4286 | G |
| 23 | BICF2P770852            | 3325957 | 0 | 0  | 0      | A |
| 23 | BICF2P227141            | 3341128 | 0 | 0  | 0      | T |
| 23 | BICF2P972809            | 3352654 | A | 0  | 0.5714 | G |
| 23 | BICF2G630393631         | 3363036 | A | 0  | 0.5714 | G |
| 23 | BICF2G630393629         | 3372367 | C | 1  | 0.4286 | G |
| 23 | G1215f31S255            | 3426578 | 0 | 0  | 0      | C |
| 23 | G1215f33S175            | 3427228 | A | 0  | 0      | G |
| 23 | BICF2G630393626         | 3456409 | A | 1  | 0.4286 | G |
| 23 | TIGRP2P298882_rs8991208 | 3490749 | 0 | 0  | 0      | A |
| 23 | G1216f18S291            | 3515576 | G | 0  | 0      | A |
| 23 | BICF2G630393624         | 3544629 | G | 1  | 0.4286 | A |
| 23 | BICF2G630393623         | 3585312 | A | 0  | 0.5714 | T |
| 23 | BICF2P261551            | 3593134 | 0 | NA | 0      | T |
| 23 | BICF2P661811            | 3604517 | 0 | 0  | 0      | A |
| 23 | TIGRP2P298884_rs8893972 | 3611720 | A | 0  | 0      | C |
| 23 | BICF2G630393617         | 3622671 | G | 1  | 0.4286 | A |
| 23 | BICF2G630393616         | 3634092 | A | 1  | 0.4286 | G |
| 23 | BICF2P1035821           | 3650740 | 0 | 0  | 0      | A |
| 23 | BICF2G630393615         | 3662396 | A | 1  | 0.4286 | G |
| 23 | BICF2P252228            | 3679994 | 0 | 0  | 0      | C |
| 23 | BICF2G630393612         | 3682263 | A | 0  | 0.5714 | C |
| 23 | BICF2G630393604         | 3692236 | A | 0  | 0      | G |
| 23 | BICF2P309462            | 3704575 | 0 | 0  | 0      | G |
| 23 | BICF2P1159515           | 3721993 | 0 | 0  | 0      | G |
| 23 | BICF2P389339            | 3754941 | 0 | 0  | 0      | G |
| 23 | BICF2G630393592         | 3771652 | A | 0  | 0.5714 | G |
| 23 | BICF2P748970            | 3779163 | 0 | 0  | 0      | G |
| 23 | BICF2S23117683          | 3820119 | C | 0  | 0      | A |
| 23 | BICF2P145283            | 3831103 | 0 | 0  | 0      | A |
| 23 | TIGRP2P298891_rs9126613 | 3844228 | T | 0  | 0      | A |
| 23 | BICF2S23626686          | 3861060 | A | 0  | 0      | C |
| 23 | BICF2S23413375          | 3870233 | G | 0  | 0      | A |
| 23 | BICF2G630393590         | 3880906 | A | 0  | 0.5714 | T |
| 23 | TIGRP2P298893_rs9104580 | 3892812 | G | 1  | 0.4286 | A |
| 23 | G1217f41S163            | 3903451 | G | 0  | 0      | A |
| 23 | BICF2P914477            | 3924961 | 0 | 0  | 0      | G |
| 23 | BICF2S2309994           | 3949917 | 0 | 0  | 0      | G |
| 23 | BICF2S24111362          | 3976089 | 0 | 0  | 0      | G |
| 23 | BICF2G630393584         | 3992123 | A | 0  | 0.5833 | G |
| 23 | BICF2P93935             | 4005014 | 0 | 0  | 0      | A |

|    |                         |         |   |   |        |   |
|----|-------------------------|---------|---|---|--------|---|
| 23 | BICF2P1297984           | 4046516 | 0 | 0 | 0      | G |
| 23 | BICF2S23419389          | 4063839 | G | 0 | 0      | A |
| 23 | TIGRP2P298914_rs9131046 | 4133761 | A | 0 | 0      | G |
| 23 | G1220f55S115            | 4160415 | 0 | 0 | 0      | C |
| 23 | BICF2G630393567         | 4185979 | A | 1 | 0.4286 | G |
| 23 | BICF2P66125             | 4193935 | C | 0 | 0.5714 | A |
| 23 | BICF2G630393566         | 4204033 | G | 1 | 0.4286 | C |
| 23 | BICF2G630393565         | 4220399 | A | 1 | 0.4286 | C |
| 23 | BICF2S23234316          | 4231110 | A | 0 | 0      | G |
| 23 | BICF2S23243284          | 4238897 | G | 0 | 0      | A |
| 23 | TIGRP2P298918_rs8500966 | 4253828 | G | 0 | 0      | A |
| 23 | BICF2P1292352           | 4255447 | A | 0 | 0      | C |
| 23 | BICF2P1408785           | 4268547 | G | 0 | 0      | A |
| 23 | TIGRP2P298925_rs8985527 | 4286261 | G | 0 | 0      | C |
| 23 | BICF2S23422080          | 4347034 | G | 0 | 0      | A |
| 23 | BICF2P280116            | 4367043 | 0 | 0 | 0      | A |
| 23 | BICF2S22948323          | 4374231 | G | 0 | 0      | A |
| 23 | BICF2P1152256           | 4386782 | G | 0 | 0      | A |
| 23 | TIGRP2P298926_rs8696588 | 4414484 | 0 | 0 | 0      | C |
| 23 | BICF2G630393560         | 4424597 | A | 0 | 0      | G |
| 23 | TIGRP2P298927_rs8816837 | 4432750 | A | 0 | 0      | G |
| 23 | BICF2G630393558         | 4442735 | G | 0 | 0      | A |
| 23 | BICF2G630393551         | 4482611 | A | 0 | 0      | G |
| 23 | TIGRP2P298930_rs8829211 | 4487725 | 0 | 0 | 0      | G |
| 23 | TIGRP2P298931_rs8613142 | 4507835 | A | 0 | 0      | G |
| 23 | BICF2G630393549         | 4512268 | A | 0 | 0      | G |
| 23 | BICF2P236823            | 4526263 | 0 | 0 | 0      | A |
| 23 | BICF2P666658            | 4545159 | 0 | 0 | 0      | G |
| 23 | BICF2G630393548         | 4561104 | A | 0 | 0      | G |
| 23 | TIGRP2P298933_rs8792450 | 4606622 | G | 0 | 0      | A |
| 23 | TIGRP2P298934_rs8918694 | 4627373 | A | 0 | 0      | G |
| 23 | BICF2P1065972           | 4642741 | A | 0 | 0      | C |
| 23 | TIGRP2P298936_rs8752310 | 4642982 | A | 0 | 0      | G |
| 23 | BICF2G630393545         | 4654119 | A | 1 | 0.4286 | G |
| 23 | BICF2P42266             | 4688528 | 0 | 0 | 0      | A |
| 23 | BICF2G630393543         | 4692641 | G | 0 | 0      | A |
| 23 | BICF2P662927            | 4725324 | C | 0 | 0      | A |
| 23 | TIGRP2P298950_rs8512217 | 4729549 | 0 | 0 | 0      | G |
| 23 | BICF2G630393540         | 4748895 | G | 0 | 0      | A |
| 23 | G1222f23S142            | 4778392 | 0 | 0 | 0      | C |
| 23 | BICF2S23016235          | 4800618 | C | 1 | 1      | A |
| 23 | BICF2P1019628           | 4807912 | 0 | 0 | 0      | A |
| 23 | BICF2G630393536         | 4832449 | G | 1 | 1      | A |
| 23 | BICF2P1124312           | 4841639 | 0 | 0 | 0      | A |
| 23 | BICF2G630393531         | 4864905 | A | 0 | 0      | G |
| 23 | BICF2S2338795           | 4931285 | 0 | 0 | 0      | G |
| 23 | BICF2G630393528         | 4938660 | G | 1 | 1      | A |

|    |                         |         |   |   |        |   |
|----|-------------------------|---------|---|---|--------|---|
| 23 | BICF2P1022950           | 4953792 | 0 | 0 | 0      | A |
| 23 | BICF2G630393527         | 4957250 | A | 1 | 0.4286 | G |
| 23 | BICF2P911000            | 4981523 | 0 | 0 | 0      | A |
| 23 | BICF2P600008            | 5011800 | G | 1 | 0.4286 | A |
| 23 | BICF2P294528            | 5017875 | A | 0 | 0      | G |
| 23 | TIGRP2P309369_rs8755427 | 5034857 | G | 0 | 0      | A |
| 23 | BICF2P196123            | 5053588 | G | 0 | 0      | A |
| 23 | BICF2P1169085           | 5083860 | A | 1 | 0.4286 | G |
| 23 | BICF2P856324            | 5104867 | 0 | 0 | 0      | G |
| 23 | BICF2G630393522         | 5106567 | G | 0 | 0      | C |
| 23 | BICF2P542859            | 5123580 | 0 | 0 | 0      | G |
| 23 | BICF2G630393521         | 5136641 | G | 0 | 0      | A |
| 23 | BICF2P853082            | 5151648 | A | 1 | 1      | G |
| 23 | BICF2S2346875           | 5183245 | G | 0 | 0      | C |
| 23 | BICF2G630393518         | 5218343 | G | 0 | 0      | A |
| 23 | TIGRP2P309375_rs8890982 | 5222367 | G | 1 | 1      | A |
| 23 | BICF2G630393513         | 5238175 | G | 0 | 0      | A |
| 23 | BICF2P1403342           | 5244968 | A | 0 | 0      | G |
| 23 | BICF2P894063            | 5276386 | A | 0 | 0      | G |
| 23 | BICF2P1459136           | 5281554 | A | 0 | 0      | G |
| 23 | BICF2P882080            | 5294751 | 0 | 0 | 0      | C |
| 23 | BICF2P615764            | 5329977 | 0 | 0 | 0      | G |
| 23 | BICF2P1110915           | 5348351 | A | 0 | 0      | C |
| 23 | BICF2P14578             | 5381790 | A | 0 | 0.5714 | G |
| 23 | BICF2S22919655          | 5404517 | G | 0 | 0      | A |
| 23 | BICF2P294299            | 5433601 | C | 1 | 1      | A |
| 23 | BICF2S23434066          | 5449462 | G | 0 | 0      | A |
| 23 | BICF2S23436728          | 5453015 | A | 1 | 1      | C |
| 23 | BICF2S23912568          | 5468402 | 0 | 0 | 0      | A |
| 23 | BICF2P806646            | 5477813 | 0 | 0 | 0      | G |
| 23 | BICF2P25730             | 5493909 | A | 1 | 1      | T |
| 23 | BICF2P645739            | 5503543 | G | 0 | 0      | A |
| 23 | TIGRP2P309397_rs8749669 | 5518686 | G | 0 | 0      | A |
| 23 | TIGRP2P309399_rs8615755 | 5525199 | A | 0 | 0      | G |
| 23 | BICF2P167682            | 5534388 | 0 | 0 | 0      | C |
| 23 | BICF2G630393509         | 5554493 | 0 | 0 | 0      | T |
| 23 | BICF2P619104            | 5568682 | C | 1 | 1      | A |
| 23 | BICF2S23448021          | 5582872 | A | 0 | 0      | G |
| 23 | BICF2G630393508         | 5593937 | 0 | 0 | 0      | A |
| 23 | BICF2P437387            | 5607692 | A | 0 | 0      | C |
| 23 | BICF2P1360315           | 5621345 | G | 1 | 1      | A |
| 23 | BICF2P1499691           | 5626362 | A | 1 | 1      | G |
| 23 | TIGRP2P309422_rs8941113 | 5646825 | G | 1 | 1      | A |
| 23 | TIGRP2P309437_rs9156812 | 5667704 | G | 1 | 1      | A |
| 23 | BICF2P1242873           | 5677952 | G | 1 | 1      | A |
| 23 | BICF2P1439672           | 5684318 | A | 1 | 1      | C |
| 23 | BICF2P918720            | 5694045 | A | 1 | 1      | G |

|    |                         |         |   |   |        |   |
|----|-------------------------|---------|---|---|--------|---|
| 23 | BICF2P938380            | 5707298 | G | 1 | 1      | A |
| 23 | BICF2S23344599          | 5718145 | A | 1 | 1      | C |
| 23 | BICF2P242478            | 5722747 | G | 1 | 1      | A |
| 23 | BICF2P222070            | 5728977 | G | 1 | 1      | A |
| 23 | BICF2P777662            | 5750173 | C | 1 | 1      | A |
| 23 | BICF2P717970            | 5759853 | C | 1 | 1      | A |
| 23 | BICF2P218147            | 5766420 | G | 1 | 1      | A |
| 23 | TIGRP2P309501_rs8650988 | 5777231 | A | 0 | 0.5714 | G |
| 23 | TIGRP2P309511_rs9114514 | 5788092 | G | 1 | 1      | A |
| 23 | BICF2P1199451           | 5805548 | A | 1 | 1      | G |
| 23 | BICF2P1332473           | 5813556 | C | 1 | 1      | G |
| 23 | BICF2P346250            | 5821540 | A | 1 | 1      | G |
| 23 | BICF2P208633            | 5834746 | G | 1 | 1      | A |
| 23 | TIGRP2P309535_rs9231826 | 5847252 | G | 1 | 1      | A |
| 23 | TIGRP2P309538_rs8711170 | 5857698 | C | 1 | 1      | A |
| 23 | TIGRP2P309540_rs8592487 | 5865925 | A | 1 | 1      | G |
| 23 | BICF2S22950697          | 5878837 | G | 1 | 1      | A |
| 23 | BICF2P1058613           | 5893951 | A | 1 | 1      | G |
| 23 | TIGRP2P309560_rs8830368 | 5906638 | A | 1 | 1      | C |
| 23 | BICF2P745381            | 5913652 | A | 1 | 1      | G |
| 23 | BICF2P539068            | 5924862 | A | 1 | 1      | G |
| 23 | TIGRP2P309579_rs8631999 | 5938349 | A | 1 | 1      | G |
| 23 | BICF2P1508782           | 5953260 | A | 1 | 1      | G |
| 23 | BICF2P1112313           | 5962912 | A | 1 | 1      | G |
| 23 | BICF2P1164646           | 5971463 | G | 1 | 1      | A |
| 23 | BICF2P239350            | 5987834 | A | 1 | 1      | G |
| 23 | BICF2P1306508           | 5998661 | A | 1 | 1      | T |
| 23 | BICF2P1046324           | 6005109 | 0 | 0 | 0      | G |
| 23 | BICF2P1373281           | 6019080 | A | 0 | 0.5714 | G |
| 23 | BICF2S229526            | 6032122 | G | 0 | 0.5714 | A |
| 23 | BICF2P1400871           | 6054487 | A | 0 | 0      | G |
| 23 | BICF2S23711509          | 6061024 | 0 | 0 | 0      | G |
| 23 | BICF2P446445            | 6081190 | 0 | 0 | 0      | C |
| 23 | BICF2S23348047          | 6094632 | G | 1 | 1      | A |
| 23 | BICF2P1004113           | 6105234 | 0 | 0 | 0      | G |
| 23 | TIGRP2P309610_rs8662419 | 6115685 | A | 1 | 1      | G |
| 23 | TIGRP2P309614_rs8756868 | 6135145 | 0 | 0 | 0      | G |
| 23 | TIGRP2P309620_rs9151470 | 6149302 | 0 | 0 | 0      | A |
| 23 | TIGRP2P309625_rs8576070 | 6159976 | G | 0 | 0.5714 | A |
| 23 | TIGRP2P309631_rs8864986 | 6165515 | G | 0 | 0.5714 | A |
| 23 | BICF2P294111            | 6182534 | A | 0 | 0.5714 | G |
| 23 | BICF2G630393501         | 6193939 | G | 1 | 0.4286 | A |
| 23 | BICF2P1314287           | 6204380 | A | 0 | 0.5714 | G |
| 23 | BICF2P854111            | 6219274 | G | 0 | 0.6    | A |
| 23 | BICF2P854113            | 6220067 | G | 0 | 0.5714 | A |
| 23 | BICF2P271532            | 6225465 | A | 0 | 0.5714 | G |
| 23 | BICF2P1057567           | 6240729 | A | 0 | 0.5714 | G |

|    |                         |         |   |   |        |   |
|----|-------------------------|---------|---|---|--------|---|
| 23 | BICF2P586387            | 6242864 | G | 0 | 0.5714 | A |
| 23 | BICF2S22959189          | 6248632 | G | 0 | 0      | A |
| 23 | BICF2P1122382           | 6258995 | A | 0 | 0.5714 | G |
| 23 | BICF2S23419232          | 6275381 | G | 0 | 0.5714 | A |
| 23 | BICF2P1267292           | 6313166 | 0 | 0 | 0      | G |
| 23 | BICF2S23760473          | 6333043 | A | 0 | 0.6    | G |
| 23 | BICF2P1425179           | 6344006 | T | 0 | 0.6    | A |
| 23 | BICF2P784101            | 6344006 | G | 0 | 0.625  | A |
| 23 | BICF2P528452            | 6352838 | G | 0 | 0.5714 | A |
| 23 | BICF2P252470            | 6364222 | 0 | 0 | 0      | G |
| 23 | BICF2P21340             | 6376240 | G | 0 | 0.5714 | A |
| 23 | TIGRP2P309667_rs8876110 | 6392369 | 0 | 0 | 0      | C |
| 23 | BICF2P529441            | 6398348 | 0 | 0 | 0      | A |
| 23 | BICF2P95205             | 6406560 | T | 0 | 0.5714 | A |
| 23 | BICF2P227784            | 6427237 | A | 0 | 0.5714 | G |
| 23 | BICF2P455351            | 6434603 | T | 0 | 0      | A |
| 23 | BICF2P112320            | 6441397 | G | 0 | 0.5714 | A |
| 23 | BICF2P623               | 6457408 | C | 1 | 1      | A |
| 23 | TIGRP2P309687_rs8830915 | 6483779 | G | 0 | 0      | A |
| 23 | BICF2S23341761          | 6489034 | A | 1 | 0.4286 | G |
| 23 | BICF2P143781            | 6520002 | A | 1 | 0.4286 | G |
| 23 | BICF2P143779            | 6520593 | G | 1 | 0.4286 | A |
| 23 | BICF2P343952            | 6551847 | A | 0 | 0.5714 | G |
| 23 | BICF2P689747            | 6571680 | A | 0 | 0      | G |
| 23 | TIGRP2P309723_rs8602789 | 6590417 | T | 0 | 0.5714 | A |
| 23 | BICF2P95203             | 6615960 | A | 0 | 0      | G |
| 23 | BICF2P390141            | 6625349 | G | 1 | 0.4286 | C |
| 23 | BICF2P107716            | 6638347 | A | 0 | 0      | G |
| 23 | BICF2P104471            | 6648851 | 0 | 0 | 0      | G |
| 23 | BICF2P837433            | 6664151 | A | 0 | 0      | G |
| 23 | BICF2P1171030           | 6673149 | G | 0 | 0      | A |
| 23 | BICF2P214346            | 6708209 | C | 0 | 0      | A |
| 23 | BICF2P980057            | 6719519 | G | 0 | 0      | C |
| 23 | BICF2G630393497         | 6729622 | 0 | 0 | 0      | C |
| 23 | TIGRP2P309737_rs8702143 | 6755933 | A | 0 | 0      | G |
| 23 | BICF2P882711            | 6763482 | A | 0 | 0      | G |
| 23 | BICF2P1018669           | 6778615 | A | 0 | 0      | G |
| 23 | BICF2P486074            | 6785335 | A | 0 | 0      | G |
| 23 | BICF2P1419384           | 6800550 | G | 0 | 0      | C |
| 23 | BICF2P924564            | 6811584 | C | 0 | 0      | G |
| 23 | TIGRP2P309751_rs8718811 | 6822696 | 0 | 0 | 0      | G |
| 23 | BICF2S22960535          | 6838955 | A | 0 | 0      | G |
| 23 | BICF2P740137            | 6850811 | C | 1 | 0.4286 | A |
| 23 | TIGRP2P309757_rs9008870 | 6861445 | 0 | 0 | 0      | C |
| 23 | BICF2P854305            | 6872090 | T | 0 | 0      | A |
| 23 | BICF2P1022801           | 6883855 | 0 | 0 | 0      | A |
| 23 | BICF2P758458            | 6893797 | 0 | 0 | 0      | A |

|    |                         |         |   |   |        |   |
|----|-------------------------|---------|---|---|--------|---|
| 23 | BICF2P826288            | 6902312 | 0 | 0 | 0      | A |
| 23 | BICF2P632208            | 6913229 | C | 0 | 0      | A |
| 23 | BICF2P520552            | 6934345 | G | 1 | 0.4286 | A |
| 23 | BICF2P298033            | 6940494 | A | 0 | 0.5714 | G |
| 23 | TIGRP2P309768_rs8500665 | 6955218 | 0 | 0 | 0      | A |
| 23 | BICF2P1342121           | 6963993 | G | 0 | 0      | A |
| 23 | BICF2P944491            | 6969025 | A | 0 | 0      | C |
| 23 | BICF2P1206096           | 6987800 | G | 0 | 0      | A |
| 23 | BICF2P1426041           | 7018313 | 0 | 0 | 0      | G |
| 23 | BICF2S23141024          | 7046131 | G | 0 | 0.5714 | A |
| 23 | BICF2P378301            | 7060307 | 0 | 0 | 0      | G |
| 23 | BICF2S23647096          | 7068673 | A | 1 | 0.4286 | G |
| 23 | BICF2P705968            | 7081791 | G | 0 | 0.5714 | A |
| 23 | TIGRP2P309780_rs9216837 | 7091341 | G | 0 | 0      | A |
| 23 | BICF2P992480            | 7104875 | A | 1 | 0.4286 | G |
| 23 | BICF2P535874            | 7107871 | A | 0 | 0      | G |
| 23 | BICF2P836495            | 7118925 | C | 0 | 0.5714 | A |
| 23 | BICF2P349800            | 7145915 | 0 | 0 | 0      | A |
| 23 | BICF2S23319137          | 7154281 | G | 0 | 0      | A |
| 23 | BICF2S23130172          | 7177041 | 0 | 0 | 0      | A |
| 23 | BICF2S23144701          | 7198419 | G | 0 | 0      | A |
| 23 | BICF2S2337261           | 7223780 | A | 1 | 0.4286 | C |
| 23 | BICF2S2306286           | 7242595 | A | 1 | 0.4286 | G |
| 23 | BICF2G630393487         | 7254831 | 0 | 0 | 0      | G |
| 23 | BICF2S23043909          | 7262268 | A | 0 | 0      | G |
| 23 | BICF2G630393483         | 7287678 | A | 0 | 0      | G |
| 23 | BICF2G630393475         | 7297108 | A | 1 | 0.4286 | G |
| 23 | BICF2G630393472         | 7302824 | G | 1 | 0.4286 | A |
| 23 | BICF2G630393457         | 7324712 | A | 1 | 0.4286 | G |
| 23 | BICF2G630393455         | 7326539 | A | 1 | 0.4286 | G |
| 23 | BICF2S23517905          | 7344899 | G | 0 | 0      | A |
| 23 | BICF2G630393445         | 7355180 | G | 0 | 0      | A |
| 23 | BICF2G630393442         | 7362611 | A | 0 | 0      | G |
| 23 | BICF2G630393432         | 7377181 | G | 1 | 0.4286 | A |
| 23 | BICF2P38573             | 7387134 | G | 1 | 0.4286 | A |
| 23 | BICF2G630393415         | 7396701 | G | 1 | 0.4286 | A |
| 23 | TIGRP2P309820_rs9221750 | 7412574 | G | 1 | 1      | A |
| 23 | TIGRP2P309821_rs8500663 | 7419979 | 0 | 0 | 0      | A |
| 23 | BICF2P59588             | 7432523 | G | 1 | 1      | A |
| 23 | BICF2P448357            | 7445695 | A | 0 | 0      | G |
| 23 | BICF2P1368063           | 7457716 | A | 0 | 0      | C |
| 23 | BICF2P723185            | 7470577 | A | 0 | 0      | G |
| 23 | TIGRP2P309838_rs8701762 | 7477652 | A | 0 | 0      | C |
| 23 | BICF2G630393408         | 7487476 | A | 0 | 0      | C |
| 23 | BICF2G630393400         | 7506201 | G | 0 | 0.5714 | A |
| 23 | BICF2G630393395         | 7515799 | A | 0 | 0      | G |
| 23 | BICF2G630393392         | 7522363 | 0 | 0 | 0      | G |

|    |                 |         |   |   |        |   |
|----|-----------------|---------|---|---|--------|---|
| 23 | BICF2G630393356 | 7533135 | G | 0 | 0      | C |
| 23 | BICF2G630393329 | 7549805 | G | 0 | 0.5714 | A |
| 23 | BICF2G630393308 | 7556507 | G | 0 | 0.5714 | A |
| 23 | BICF2S233447    | 7567232 | A | 0 | 0      | G |
| 23 | BICF2G630393289 | 7583565 | A | 0 | 0.5714 | G |
| 23 | BICF2G630393275 | 7590940 | G | 0 | 0      | A |
| 23 | BICF2G630393251 | 7611487 | 0 | 0 | 0      | G |
| 23 | BICF2G630393250 | 7613159 | 0 | 0 | 0      | G |
| 23 | BICF2G630393243 | 7626241 | G | 1 | 1      | A |
| 23 | BICF2G630393235 | 7636065 | G | 1 | 1      | A |
| 23 | BICF2G630393216 | 7651680 | 0 | 0 | 0      | G |
| 23 | BICF2G630393201 | 7671917 | A | 0 | 0      | G |
| 23 | BICF2G630393194 | 7682735 | A | 0 | 0      | G |
| 23 | BICF2G630393160 | 7702318 | A | 0 | 0.5714 | G |
| 23 | BICF2P605810    | 7710450 | 0 | 0 | 0      | A |
| 23 | BICF2G630393156 | 7720296 | A | 1 | 1      | G |
| 23 | BICF2G630393121 | 7738431 | G | 0 | 0      | A |
| 23 | BICF2G630393120 | 7739093 | G | 0 | 0      | A |
| 23 | BICF2G630393118 | 7740348 | A | 0 | 0      | G |
| 23 | BICF2G630393108 | 7751123 | A | 0 | 0.5714 | G |
| 23 | BICF2G630393080 | 7765307 | A | 0 | 0      | G |
| 23 | BICF2G630393070 | 7775833 | A | 0 | 0      | G |
| 23 | BICF2G630393068 | 7788365 | A | 1 | 1      | G |
| 23 | BICF2S23514412  | 7813542 | A | 1 | 1      | G |
| 23 | BICF2S23512631  | 7825838 | G | 1 | 1      | A |
| 23 | BICF2S23049607  | 7853295 | 0 | 0 | 0      | G |
| 23 | BICF2P566062    | 7872342 | 0 | 0 | 0      | A |
| 23 | BICF2P504001    | 7879116 | 0 | 0 | 0      | A |
| 23 | BICF2G630393052 | 7907951 | A | 0 | 0.5714 | G |
| 23 | BICF2S23761089  | 7917148 | A | 0 | 0      | C |
| 23 | BICF2G630393032 | 7929057 | T | 1 | 1      | A |
| 23 | BICF2S23044055  | 7944910 | A | 0 | 0      | G |
| 23 | BICF2S24510619  | 7955076 | A | 1 | 0.4286 | G |
| 23 | BICF2G630393007 | 7958783 | A | 0 | 0.5714 | T |
| 23 | BICF2G630392996 | 7972651 | G | 0 | 0      | A |
| 23 | BICF2G630392973 | 7983119 | A | 0 | 0      | G |
| 23 | BICF2G630392951 | 7992593 | G | 0 | 0.5714 | A |
| 23 | BICF2G630392934 | 8012853 | A | 0 | 0      | G |
| 23 | BICF2S22950401  | 8018016 | G | 0 | 0.5714 | A |
| 23 | BICF2G630392924 | 8037021 | G | 0 | 0      | A |
| 23 | BICF2S2368536   | 8041087 | A | 0 | 0      | G |
| 23 | BICF2S2447372   | 8058209 | G | 0 | 0.5714 | A |
| 23 | BICF2G630392915 | 8062285 | A | 0 | 0      | G |
| 23 | BICF2G630392909 | 8074872 | A | 0 | 0      | G |
| 23 | BICF2G630392892 | 8091997 | G | 0 | 0      | A |
| 23 | BICF2G630392876 | 8100344 | A | 0 | 0.5833 | G |
| 23 | BICF2G630392863 | 8110059 | A | 0 | 0.5714 | G |



|    |                         |         |   |   |        |   |
|----|-------------------------|---------|---|---|--------|---|
| 23 | BICF2G630392847         | 8121429 | A | 0 | 0.5714 | G |
| 23 | BICF2S2362278           | 8134612 | G | 0 | 0      | A |
| 23 | TIGRP2P309891_rs9062231 | 8142666 | G | 0 | 0.5714 | A |
| 23 | BICF2G630392819         | 8159960 | G | 0 | 0.5714 | A |
| 23 | BICF2G630392816         | 8166301 | A | 1 | 0.4286 | G |
| 23 | BICF2G630392799         | 8191902 | G | 0 | 0      | A |
| 23 | BICF2G630392789         | 8209431 | G | 1 | 1      | C |
| 23 | BICF2S23021943          | 8250319 | G | 0 | 0      | A |
| 23 | TIGRP2P309912_rs8916206 | 8265267 | A | 0 | 0      | G |
| 23 | TIGRP2P309919_rs9099457 | 8279806 | G | 0 | 0      | A |
| 23 | TIGRP2P309922_rs9099455 | 8281175 | G | 0 | 0      | A |
| 23 | BICF2P1024358           | 8308430 | A | 1 | 0.4167 | G |
| 23 | BICF2P1235218           | 8321132 | 0 | 0 | 0      | G |
| 23 | BICF2S22913462          | 8328386 | A | 0 | 0      | G |
| 23 | BICF2G630392702         | 8339702 | A | 1 | 1      | C |
| 23 | BICF2G630392684         | 8356322 | A | 0 | 0.5714 | G |
| 23 | BICF2G630392679         | 8366999 | A | 0 | 0.5714 | C |
| 23 | BICF2S2455215           | 8376955 | A | 1 | 0.4286 | C |
| 23 | TIGRP2P309936_rs8966493 | 8387742 | A | 0 | 0      | C |
| 23 | BICF2P126025            | 8395626 | 0 | 0 | 0      | A |
| 23 | BICF2S23246669          | 8412119 | A | 0 | 0      | G |
| 23 | BICF2G630392630         | 8422090 | G | 1 | 1      | A |
| 23 | BICF2G630392605         | 8479386 | A | 0 | 0      | G |
| 23 | BICF2S23220904          | 8490215 | A | 1 | 0.4286 | G |
| 23 | BICF2G630392563         | 8520792 | A | 0 | 0      | G |
| 23 | BICF2G630392554         | 8526000 | G | 1 | 0.4286 | A |
| 23 | BICF2G630392539         | 8536064 | A | 1 | 1      | G |
| 23 | BICF2S23336463          | 8548147 | G | 1 | 0.4286 | A |
| 23 | BICF2S23350539          | 8563439 | A | 0 | 0.5714 | G |
| 23 | BICF2G630392521         | 8583478 | A | 1 | 1      | G |
| 23 | BICF2G630392508         | 8599257 | A | 0 | 0      | C |
| 23 | BICF2G630392501         | 8608306 | A | 0 | 0      | G |
| 23 | BICF2G630392490         | 8615937 | 0 | 0 | 0      | T |
| 23 | BICF2G630392474         | 8632532 | A | 0 | 0      | G |
| 23 | BICF2P1410874           | 8646965 | G | 0 | 0      | A |
| 23 | BICF2G630392463         | 8654516 | A | 0 | 0      | G |
| 23 | BICF2S23026196          | 8671667 | G | 0 | 0      | A |
| 23 | BICF2G630392430         | 8689430 | G | 0 | 0      | A |
| 23 | BICF2P837959            | 8700010 | A | 0 | 0      | G |
| 23 | BICF2G630392418         | 8709245 | A | 0 | 0      | G |
| 23 | BICF2G630392412         | 8720064 | A | 1 | 1      | G |
| 23 | BICF2P824928            | 8734532 | A | 1 | 1      | G |
| 23 | BICF2S23251591          | 8750069 | A | 0 | 0.5714 | G |
| 23 | BICF2P924274            | 8757479 | C | 0 | 0.5833 | A |
| 23 | BICF2P233198            | 8767120 | G | 1 | 0.4286 | A |
| 23 | BICF2G630392397         | 8778327 | G | 0 | 0      | A |
| 23 | TIGRP2P309963_rs8548588 | 8786268 | A | 1 | 0.4286 | G |

|    |                         |         |   |    |        |   |
|----|-------------------------|---------|---|----|--------|---|
| 23 | BICF2G630392396         | 8801012 | A | 0  | 0      | G |
| 23 | BICF2P911356            | 8813597 | 0 | 0  | 0      | C |
| 23 | BICF2P175876            | 8820936 | 0 | 0  | 0      | G |
| 23 | BICF2S23033598          | 8848325 | T | 0  | 0.5714 | A |
| 23 | BICF2S23639136          | 8857623 | A | 0  | 0      | G |
| 23 | BICF2G630392385         | 8868435 | A | 1  | 1      | G |
| 23 | BICF2G630392364         | 8882076 | G | 0  | 0      | A |
| 23 | BICF2G630392340         | 8889740 | A | 0  | 0      | G |
| 23 | BICF2G630392324         | 8904984 | A | 0  | 0      | G |
| 23 | BICF2G630392315         | 8918077 | A | 1  | 0.4286 | G |
| 23 | BICF2G630392300         | 8924577 | G | 0  | 0      | A |
| 23 | BICF2G630392292         | 8937749 | A | 1  | 1      | G |
| 23 | BICF2G630392272         | 8953297 | G | 1  | 1      | A |
| 23 | BICF2G630392259         | 8968942 | G | 0  | 0      | A |
| 23 | BICF2G630392256         | 8974249 | A | 0  | 0      | G |
| 23 | BICF2G630392174         | 9009663 | A | 0  | 0      | G |
| 23 | BICF2S23661700          | 9029004 | A | 1  | 1      | G |
| 23 | BICF2P590290            | 9043536 | A | 0  | 0      | G |
| 23 | BICF2G630392165         | 9053270 | C | 0  | 0      | A |
| 23 | BICF2P1072462           | 9072981 | A | 0  | 0      | G |
| 23 | BICF2P594720            | 9073581 | G | 0  | 0      | A |
| 23 | BICF2P613664            | 9091044 | A | 0  | 0      | G |
| 23 | BICF2S22956970          | 9097929 | A | 0  | 0      | C |
| 23 | BICF2S23445271          | 9114620 | G | 0  | 0      | A |
| 23 | BICF2P1044191           | 9122393 | G | 1  | 1      | A |
| 23 | BICF2G630392116         | 9122577 | G | 1  | 1      | A |
| 23 | BICF2G630392114         | 9133363 | T | 1  | 1      | A |
| 23 | BICF2G630392104         | 9146197 | A | 0  | 0      | G |
| 23 | BICF2G630392095         | 9155782 | G | NA | 1      | A |
| 23 | BICF2G630392090         | 9169229 | A | 0  | 0      | C |
| 23 | BICF2G630392081         | 9188462 | A | 0  | 0.5714 | G |
| 23 | BICF2P1417142           | 9194125 | G | 0  | 0      | A |
| 23 | BICF2G630392070         | 9205143 | G | 1  | 0.4286 | A |
| 23 | BICF2G630392035         | 9231325 | A | 0  | 0      | G |
| 23 | BICF2P54383             | 9242154 | G | 1  | 1      | A |
| 23 | TIGRP2P310085_rs8770095 | 9254998 | 0 | 0  | 0      | C |
| 23 | BICF2G630391989         | 9258770 | G | 1  | 0.4286 | A |
| 23 | BICF2G630391984         | 9260135 | G | 1  | 0.4286 | A |
| 23 | BICF2P889877            | 9272566 | C | 1  | 1      | A |
| 23 | TIGRP2P310094_rs9143569 | 9291216 | A | 0  | 0      | G |
| 23 | BICF2G630391949         | 9303459 | G | 1  | 1      | A |
| 23 | BICF2G630391937         | 9309569 | G | 0  | 0      | A |
| 23 | BICF2G630391922         | 9324904 | A | 0  | 0      | G |
| 23 | BICF2G630391911         | 9332497 | A | 0  | 0      | G |
| 23 | BICF2G630391894         | 9338398 | G | 0  | 0      | A |
| 23 | BICF2G630391876         | 9347970 | A | 1  | 0.4286 | G |
| 23 | BICF2G630391863         | 9352097 | G | 1  | 0.4286 | A |

|    |                         |         |   |   |        |   |
|----|-------------------------|---------|---|---|--------|---|
| 23 | BICF2G630391798         | 9366672 | A | 0 | 0.5714 | G |
| 23 | BICF2G630391791         | 9380198 | A | 0 | 0.5714 | G |
| 23 | BICF2G630391790         | 9384644 | A | 0 | 0.5714 | G |
| 23 | BICF2G630391772         | 9395717 | G | 1 | 0.4286 | A |
| 23 | BICF2G630391742         | 9411433 | A | 1 | 0.4286 | G |
| 23 | BICF2G630391738         | 9421420 | A | 0 | 0      | G |
| 23 | BICF2G630391727         | 9438341 | G | 0 | 0      | A |
| 23 | BICF2G630391726         | 9446470 | A | 0 | 0      | G |
| 23 | BICF2P9725              | 9461024 | A | 0 | 0      | G |
| 23 | BICF2G630391703         | 9466081 | G | 1 | 0.4286 | A |
| 23 | BICF2S23454618          | 9477513 | G | 0 | 0      | A |
| 23 | BICF2S23546735          | 9494287 | G | 0 | 0      | A |
| 23 | BICF2S23319165          | 9499710 | G | 0 | 0      | A |
| 23 | BICF2G630391690         | 9516960 | A | 0 | 0      | G |
| 23 | BICF2S23424471          | 9529733 | G | 1 | 0.4286 | A |
| 23 | BICF2P358020            | 9534170 | G | 0 | 0.5714 | A |
| 23 | BICF2G630391685         | 9534898 | G | 1 | 0.4167 | A |
| 23 | BICF2G630391681         | 9541565 | G | 0 | 0      | A |
| 23 | BICF2G630391672         | 9546892 | G | 1 | 1      | A |
| 23 | BICF2S2368215           | 9565488 | C | 0 | 0      | A |
| 23 | BICF2G630391606         | 9570796 | A | 1 | 0.4286 | C |
| 23 | TIGRP2P310186_rs8703611 | 9580467 | A | 0 | 0.5714 | G |
| 23 | BICF2P573498            | 9592018 | G | 0 | 0      | A |
| 23 | BICF2S23347439          | 9602603 | A | 0 | 0.5714 | G |
| 23 | BICF2G630391574         | 9624960 | A | 0 | 0.5714 | G |
| 23 | BICF2G630391545         | 9629872 | A | 1 | 0.4286 | G |
| 23 | TIGRP2P310209_rs8887737 | 9641146 | C | 0 | 0      | A |
| 23 | BICF2G630391501         | 9657603 | A | 0 | 0      | G |
| 23 | BICF2S23227122          | 9664858 | A | 1 | 0.4286 | G |
| 23 | BICF2G630391496         | 9680302 | 0 | 0 | 0      | G |
| 23 | BICF2G630391489         | 9688204 | A | 1 | 0.4286 | G |
| 23 | BICF2G630391460         | 9705898 | G | 1 | 0.4286 | A |
| 23 | BICF2G630391431         | 9738812 | A | 1 | 0.4286 | G |
| 23 | BICF2G630391420         | 9749522 | T | 1 | 0.4286 | A |
| 23 | BICF2P997187            | 9764064 | A | 1 | 1      | T |
| 23 | BICF2G630391382         | 9778458 | C | 0 | 0.5714 | G |
| 23 | BICF2P1380607           | 9778789 | A | 1 | 0.4286 | C |
| 23 | BICF2G630391377         | 9796758 | G | 0 | 0.5714 | A |
| 23 | BICF2G630391369         | 9800341 | G | 0 | 0.5714 | A |
| 23 | BICF2G630391348         | 9842126 | A | 1 | 0.4    | C |
| 23 | BICF2G630391347         | 9854674 | A | 0 | 0      | G |
| 23 | BICF2G630391339         | 9858956 | 0 | 0 | 0      | G |
| 23 | BICF2G630391329         | 9898280 | A | 1 | 1      | G |
| 23 | BICF2G630391322         | 9908421 | C | 1 | 0.4286 | G |
| 23 | BICF2G630391318         | 9917236 | G | 0 | 0.5714 | A |
| 23 | TIGRP2P310237_rs8659382 | 9927864 | A | 0 | 0      | G |
| 23 | BICF2G630391295         | 9946927 | G | 0 | 0.5714 | A |

|    |                         |          |   |   |        |   |
|----|-------------------------|----------|---|---|--------|---|
| 23 | BICF2G630391292         | 9953774  | A | 0 | 0      | G |
| 23 | BICF2G630391286         | 9970252  | A | 0 | 0      | C |
| 23 | BICF2P1196441           | 9981265  | A | 0 | 0.5714 | C |
| 23 | BICF2G630391280         | 9990606  | A | 0 | 0      | G |
| 23 | BICF2G630391276         | 10003192 | G | 0 | 0.5714 | A |
| 23 | BICF2G630391273         | 10009919 | G | 0 | 0      | A |
| 23 | BICF2G630391267         | 10021868 | C | 0 | 0      | A |
| 23 | BICF2G630391264         | 10034251 | G | 0 | 0.5714 | A |
| 23 | BICF2P942594            | 10054950 | 0 | 0 | 0      | A |
| 23 | BICF2S23518136          | 10077972 | G | 0 | 0      | A |
| 23 | BICF2G630391251         | 10088796 | G | 1 | 1      | A |
| 23 | BICF2P1242693           | 10101496 | 0 | 0 | 0      | G |
| 23 | BICF2S23759357          | 10119376 | C | 0 | 0      | A |
| 23 | TIGRP2P298975_rs8517409 | 10120724 | G | 0 | 0      | A |
| 23 | BICF2P1206049           | 10139252 | A | 0 | 0      | G |
| 23 | BICF2S23516874          | 10144942 | A | 0 | 0      | G |
| 23 | BICF2G630391227         | 10163418 | A | 0 | 0      | G |
| 23 | TIGRP2P298985_rs9174555 | 10172205 | C | 0 | 0      | A |
| 23 | TIGRP2P298994_rs8805352 | 10178219 | A | 0 | 0      | G |
| 23 | TIGRP2P298999_rs9253728 | 10190085 | C | 0 | 0      | A |
| 23 | TIGRP2P299006_rs8934313 | 10201067 | A | 0 | 0      | C |
| 23 | TIGRP2P299011_rs8749347 | 10214442 | A | 0 | 0.5714 | G |
| 23 | BICF2P1131559           | 10229091 | A | 0 | 0      | G |
| 23 | TIGRP2P299023_rs8598627 | 10235696 | G | 0 | 0      | A |
| 23 | BICF2P1123671           | 10251822 | G | 1 | 0.4286 | A |
| 23 | BICF2G630391201         | 10254657 | G | 0 | 0      | A |
| 23 | BICF2P1012364           | 10259066 | A | 0 | 0      | C |
| 23 | BICF2P277418            | 10274239 | 0 | 0 | 0      | G |
| 23 | BICF2G630391190         | 10283889 | G | 0 | 0      | A |
| 23 | BICF2P226329            | 10311099 | A | 1 | 0.4286 | G |
| 23 | TIGRP2P299053_rs8958582 | 10318975 | G | 0 | 0      | A |
| 23 | BICF2P1194958           | 10357330 | G | 0 | 0      | A |
| 23 | BICF2S23020182          | 10367113 | A | 0 | 0      | G |
| 23 | BICF2G630391169         | 10379087 | A | 0 | 0      | G |
| 23 | BICF2P1209279           | 10385543 | G | 0 | 0      | A |
| 23 | BICF2P1052809           | 10393309 | A | 0 | 0      | T |
| 23 | BICF2G630391160         | 10401918 | G | 0 | 0      | A |
| 23 | BICF2G630391159         | 10402012 | A | 0 | 0.5714 | G |
| 23 | BICF2G630391148         | 10414510 | A | 0 | 0      | G |
| 23 | BICF2G630391116         | 10429954 | A | 1 | 1      | G |
| 23 | BICF2G630391098         | 10438126 | A | 1 | 1      | G |
| 23 | BICF2G630391090         | 10443685 | A | 1 | 1      | G |
| 23 | BICF2G630391057         | 10455039 | A | 0 | 0.5714 | G |
| 23 | TIGRP2P299103_rs8740783 | 10468334 | C | 0 | 0      | A |
| 23 | BICF2P1085352           | 10468509 | A | 1 | 0.4286 | G |
| 23 | BICF2P677816            | 10487829 | 0 | 0 | 0      | G |
| 23 | BICF2G630391016         | 10507607 | A | 1 | 0.4286 | G |

|    |                         |          |   |   |        |   |
|----|-------------------------|----------|---|---|--------|---|
| 23 | BICF2S23656192          | 10519919 | A | 0 | 0.5714 | G |
| 23 | BICF2P343774            | 10528446 | A | 0 | 0.5714 | G |
| 23 | BICF2G630390993         | 10534867 | 0 | 0 | 0      | G |
| 23 | BICF2G630390986         | 10540592 | G | 0 | 0      | A |
| 23 | BICF2P1344053           | 10554529 | A | 0 | 0.5714 | G |
| 23 | BICF2P1157661           | 10560116 | A | 0 | 0      | G |
| 23 | BICF2G630390950         | 10570011 | G | 1 | 0.4286 | A |
| 23 | BICF2G630390937         | 10580495 | 0 | 0 | 0      | G |
| 23 | BICF2G630390935         | 10597341 | A | 1 | 1      | G |
| 23 | BICF2G630390933         | 10605930 | G | 0 | 0      | A |
| 23 | BICF2G630390903         | 10617034 | A | 1 | 0.4286 | G |
| 23 | BICF2P1185256           | 10629018 | G | 0 | 0      | A |
| 23 | BICF2P812469            | 10640160 | G | 0 | 0      | A |
| 23 | BICF2G630390862         | 10656726 | C | 0 | 0      | A |
| 23 | BICF2S2391557           | 10666668 | A | 0 | 0.5714 | C |
| 23 | BICF2G630390860         | 10672190 | C | 1 | 0.4286 | A |
| 23 | BICF2P288945            | 10693811 | 0 | 0 | 0      | G |
| 23 | BICF2S22937704          | 10704473 | A | 0 | 0.5714 | G |
| 23 | BICF2G630390856         | 10712804 | G | 0 | 0.5714 | A |
| 23 | BICF2G630390848         | 10745783 | C | 0 | 0.5714 | A |
| 23 | BICF2G630390844         | 10761122 | 0 | 0 | 0      | G |
| 23 | BICF2G630390842         | 10771854 | A | 0 | 0      | G |
| 23 | BICF2P1426226           | 10778388 | A | 0 | 0      | G |
| 23 | BICF2P690240            | 10793507 | A | 0 | 0      | G |
| 23 | BICF2P1144401           | 10804240 | A | 1 | 0.4286 | G |
| 23 | BICF2G630390814         | 10812724 | A | 0 | 0.5833 | G |
| 23 | BICF2G630390793         | 10824701 | A | 0 | 0      | G |
| 23 | BICF2P1455860           | 10841562 | A | 1 | 0.4286 | G |
| 23 | BICF2P216351            | 10849818 | A | 0 | 0      | G |
| 23 | TIGRP2P299178_rs8676113 | 10865487 | G | 1 | 0.4286 | A |
| 23 | BICF2G630390763         | 10868694 | A | 0 | 0      | G |
| 23 | BICF2P1505              | 10879990 | G | 0 | 0      | A |
| 23 | BICF2G630390722         | 10888163 | A | 0 | 0.5714 | G |
| 23 | BICF2G630390704         | 10901312 | G | 0 | 0      | A |
| 23 | BICF2G630390697         | 10907024 | A | 0 | 0.5714 | G |
| 23 | BICF2G630390691         | 10915620 | A | 0 | 0      | G |
| 23 | BICF2G630390688         | 10925177 | A | 0 | 0      | G |
| 23 | BICF2G630390667         | 10940417 | G | 0 | 0      | A |
| 23 | BICF2P349258            | 10957182 | A | 1 | 0.4286 | C |
| 23 | BICF2P1123789           | 10962891 | 0 | 0 | 0      | G |
| 23 | BICF2G630390662         | 10971526 | 0 | 0 | 0      | A |
| 23 | BICF2G630390652         | 10987027 | G | 1 | 0.4286 | A |
| 23 | BICF2G630390628         | 11004665 | G | 0 | 0.5714 | A |
| 23 | BICF2G630390626         | 11008532 | A | 1 | 0.4286 | G |
| 23 | BICF2G630390612         | 11022944 | A | 1 | 0.4    | G |
| 23 | BICF2G630390598         | 11030739 | A | 1 | 0.4286 | G |
| 23 | BICF2G630390574         | 11051215 | C | 1 | 0.4286 | A |

|    |                         |          |   |   |        |   |
|----|-------------------------|----------|---|---|--------|---|
| 23 | BICF2P1241325           | 11058739 | G | 1 | 0.4286 | A |
| 23 | BICF2G630390568         | 11067688 | A | 0 | 0      | G |
| 23 | BICF2S23258218          | 11082558 | A | 1 | 0.4167 | G |
| 23 | BICF2P432206            | 11086221 | 0 | 0 | 0      | A |
| 23 | TIGRP2P299241_rs8489115 | 11107496 | 0 | 0 | 0      | C |
| 23 | BICF2G630390551         | 11110052 | A | 1 | 0.4286 | G |
| 23 | BICF2G630390515         | 11120813 | C | 0 | 0      | A |
| 23 | TIGRP2P299251_rs9203805 | 11134060 | A | 0 | 0.5714 | G |
| 23 | BICF2P1108164           | 11144193 | C | 0 | 0.5714 | A |
| 23 | BICF2P319618            | 11150018 | G | 0 | 0      | A |
| 23 | TIGRP2P299265_rs9039847 | 11156779 | 0 | 0 | 0      | G |
| 23 | BICF2P1233678           | 11175176 | 0 | 0 | 0      | C |
| 23 | BICF2P1233676           | 11180374 | G | 0 | 0      | A |
| 23 | BICF2G630390477         | 11207534 | A | 0 | 0.5714 | G |
| 23 | BICF2P17617             | 11219202 | 0 | 0 | 0      | G |
| 23 | BICF2G630390469         | 11232453 | G | 0 | 0.5714 | A |
| 23 | BICF2G630390466         | 11240220 | G | 0 | 0      | A |
| 23 | TIGRP2P299282_rs8948371 | 11264852 | T | 0 | 0.5714 | A |
| 23 | BICF2G630390460         | 11271955 | A | 0 | 0      | C |
| 23 | BICF2G630390451         | 11292636 | A | 0 | 0      | C |
| 23 | BICF2G630390442         | 11303774 | A | 1 | 0.4286 | G |
| 23 | BICF2G630390439         | 11308147 | A | 1 | 0.4286 | T |
| 23 | BICF2S23327013          | 11308196 | A | 0 | 0      | T |
| 23 | BICF2G630390428         | 11320267 | A | 1 | 0.4286 | G |
| 23 | BICF2G630390413         | 11335129 | A | 0 | 0.5714 | G |
| 23 | BICF2G630390406         | 11343013 | A | 1 | 0.4167 | G |
| 23 | BICF2G630390403         | 11349381 | A | 1 | 0.4286 | G |
| 23 | TIGRP2P299299_rs9017901 | 11352057 | G | 0 | 0      | A |
| 23 | BICF2G630390391         | 11379370 | A | 0 | 0      | G |
| 23 | BICF2G630390381         | 11386721 | G | 0 | 0      | A |
| 23 | BICF2G630390364         | 11412075 | G | 0 | 0      | A |
| 23 | BICF2G630390341         | 11439574 | C | 0 | 0      | A |
| 23 | BICF2P518080            | 11452837 | G | 0 | 0      | A |
| 23 | BICF2G630390310         | 11456838 | A | 1 | 0.4286 | G |
| 23 | BICF2G630390309         | 11469833 | A | 0 | 0      | G |
| 23 | BICF2S23631279          | 11481921 | A | 0 | 0      | G |
| 23 | BICF2S23325656          | 11493321 | A | 0 | 0      | G |
| 23 | BICF2S2367738           | 11516850 | T | 0 | 0      | A |
| 23 | BICF2G630390304         | 11530629 | A | 0 | 0      | G |
| 23 | BICF2G630390290         | 11535149 | A | 0 | 0      | G |
| 23 | BICF2S2324744           | 11557489 | A | 0 | 0      | C |
| 23 | BICF2G630390266         | 11558995 | A | 0 | 0      | C |
| 23 | BICF2G630390259         | 11574163 | A | 0 | 0.5714 | G |
| 23 | BICF2G630390254         | 11591211 | C | 0 | 0      | A |
| 23 | BICF2G630390236         | 11602771 | G | 1 | 1      | A |
| 23 | BICF2P754981            | 11605039 | G | 1 | 1      | A |
| 23 | BICF2G630390209         | 11632831 | A | 1 | 1      | G |

|    |                         |          |   |     |        |   |
|----|-------------------------|----------|---|-----|--------|---|
| 23 | BICF2P473262            | 11650621 | G | 0   | 0      | A |
| 23 | BICF2P1166590           | 11662142 | A | 0   | 0      | G |
| 23 | BICF2P525958            | 11682850 | A | 0   | 0.5714 | C |
| 23 | BICF2G630390172         | 11688432 | G | 0   | 0.5714 | A |
| 23 | BICF2G630390171         | 11688506 | A | 0   | 0.5714 | T |
| 23 | BICF2G630390152         | 11713401 | A | 0   | 0.5714 | G |
| 23 | BICF2G630390145         | 11727587 | A | 0   | 0.5714 | C |
| 23 | BICF2G630390135         | 11738598 | G | 0   | 0.5714 | A |
| 23 | BICF2G630390128         | 11753746 | G | 0   | 0.5714 | A |
| 23 | BICF2G630390113         | 11770716 | A | 1   | 0.4286 | G |
| 23 | BICF2G630390107         | 11776131 | A | 1   | 0.4286 | G |
| 23 | BICF2G630390102         | 11778893 | A | 1   | 0.4286 | G |
| 23 | BICF2G630390085         | 11798334 | A | 0   | 0      | G |
| 23 | BICF2G630390047         | 11814468 | G | 0   | 0.5714 | A |
| 23 | BICF2G630390043         | 11829342 | G | 0   | 0      | A |
| 23 | BICF2G630390041         | 11839853 | A | 0   | 0      | G |
| 23 | BICF2G630390034         | 11846112 | A | 0   | 0      | G |
| 23 | BICF2S23649824          | 11851914 | A | 0   | 0.5714 | C |
| 23 | BICF2G630390018         | 11853579 | A | 0   | 0      | C |
| 23 | BICF2P761942            | 11858721 | A | 1   | 0.4286 | G |
| 23 | BICF2P624531            | 11879008 | A | 0   | 0.5714 | G |
| 23 | BICF2P1304787           | 11885990 | A | 0   | 0.5714 | C |
| 23 | TIGRP2P299361_rs9086992 | 11897188 | A | 0   | 0.5714 | G |
| 23 | BICF2G630390007         | 11911957 | G | 0   | 0      | A |
| 23 | BICF2G630389999         | 11917763 | C | 0   | 0      | A |
| 23 | BICF2G630389944         | 11935938 | A | 1   | 1      | G |
| 23 | BICF2P541160            | 11944815 | A | 0   | 0      | G |
| 23 | TIGRP2P299383_rs8594037 | 11957102 | 0 | 0   | 0      | G |
| 23 | TIGRP2P299391_rs8759544 | 11980130 | A | 0   | 0      | G |
| 23 | BICF2P370487            | 11993449 | C | 1   | 0.4286 | A |
| 23 | TIGRP2P299399_rs8982664 | 11996281 | 0 | 0   | 0      | G |
| 23 | BICF2S23229866          | 12010804 | G | 0   | 0      | A |
| 23 | BICF2S22929379          | 12035150 | A | 0   | 0      | G |
| 23 | BICF2P945146            | 12049900 | G | 0   | 0.5714 | A |
| 23 | BICF2S2301006           | 12053335 | G | 0.5 | 0.25   | A |
| 23 | BICF2P1235671           | 12067524 | A | 0   | 0      | C |
| 23 | BICF2G630389866         | 12067653 | A | 0   | 0.5714 | G |
| 23 | BICF2P1387487           | 12074297 | G | 0   | 0      | A |
| 23 | BICF2G630389855         | 12085555 | A | 0   | 0.5714 | G |
| 23 | BICF2P1367491           | 12092074 | G | 0   | 0      | A |
| 23 | BICF2G630389839         | 12107313 | A | 0   | 0.5714 | G |
| 23 | BICF2G630389826         | 12113540 | A | 0   | 0.5714 | G |
| 23 | BICF2G630389807         | 12124475 | G | 1   | 0.4286 | A |
| 23 | BICF2G630389780         | 12135366 | G | 0   | 0.5714 | A |
| 23 | BICF2G630389752         | 12151088 | A | 0   | 0      | G |
| 23 | BICF2P1125306           | 12156955 | G | 1   | 1      | A |
| 23 | BICF2G630389694         | 12189209 | G | 0   | 0      | C |

|    |                         |          |   |   |        |   |
|----|-------------------------|----------|---|---|--------|---|
| 23 | BICF2P227877            | 12190195 | G | 0 | 0      | A |
| 23 | BICF2G630389669         | 12208230 | A | 0 | 0      | C |
| 23 | BICF2G630389644         | 12221798 | A | 0 | 0      | G |
| 23 | BICF2G630389640         | 12225946 | G | 0 | 0      | A |
| 23 | BICF2G630389625         | 12236719 | G | 0 | 0      | A |
| 23 | BICF2G630389600         | 12255464 | G | 0 | 0.5714 | A |
| 23 | BICF2G630389586         | 12264691 | A | 0 | 0      | G |
| 23 | BICF2G630389559         | 12275164 | G | 0 | 0      | A |
| 23 | BICF2G630389551         | 12286970 | C | 1 | 1      | A |
| 23 | BICF2G630389541         | 12301257 | G | 0 | 0      | A |
| 23 | BICF2G630389523         | 12305666 | A | 0 | 0      | G |
| 23 | BICF2G630389499         | 12319867 | A | 0 | 0.5714 | G |
| 23 | BICF2G630389486         | 12330710 | G | 1 | 0.4286 | A |
| 23 | BICF2G630389453         | 12341239 | A | 0 | 0      | G |
| 23 | BICF2G630389381         | 12353851 | A | 0 | 0      | G |
| 23 | BICF2G630389332         | 12375984 | A | 1 | 1      | G |
| 23 | BICF2G630389302         | 12385849 | G | 0 | 0      | A |
| 23 | BICF2G630389284         | 12398898 | G | 0 | 0.5714 | A |
| 23 | BICF2S23013969          | 12408903 | A | 0 | 0      | G |
| 23 | BICF2G630389269         | 12420789 | A | 0 | 0.5833 | G |
| 23 | BICF2G630389234         | 12431676 | G | 1 | 0.4286 | A |
| 23 | BICF2G630389181         | 12447924 | A | 1 | 0.4    | C |
| 23 | BICF2P336477            | 12458988 | A | 0 | 0      | C |
| 23 | BICF2P841898            | 12469167 | A | 0 | 0      | G |
| 23 | BICF2G630389145         | 12478140 | A | 1 | 1      | G |
| 23 | BICF2G630389144         | 12478227 | C | 1 | 0.4286 | G |
| 23 | BICF2G630389115         | 12498159 | A | 1 | 1      | G |
| 23 | BICF2G630389101         | 12513303 | A | 0 | 0.5714 | G |
| 23 | BICF2G630389086         | 12532999 | G | 0 | 0.5714 | A |
| 23 | BICF2G630389080         | 12535902 | A | 0 | 0.5714 | C |
| 23 | BICF2G630389064         | 12550014 | G | 0 | 0.5714 | A |
| 23 | BICF2G630389055         | 12559683 | C | 0 | 0      | A |
| 23 | BICF2G630389043         | 12563980 | A | 0 | 0      | G |
| 23 | BICF2G630389042         | 12563998 | G | 0 | 0      | A |
| 23 | BICF2G630389033         | 12585711 | A | 0 | 0      | G |
| 23 | BICF2P420467            | 12592891 | 0 | 0 | 0      | A |
| 23 | BICF2P762688            | 12604195 | 0 | 0 | 0      | A |
| 23 | BICF2P1346246           | 12616231 | G | 0 | 0      | A |
| 23 | BICF2P510002            | 12631844 | 0 | 0 | 0      | C |
| 23 | BICF2P866290            | 12646296 | A | 0 | 0      | G |
| 23 | BICF2P173784            | 12653656 | A | 0 | 0      | G |
| 23 | BICF2P135188            | 12661135 | G | 0 | 0      | A |
| 23 | BICF2S23610727          | 12674107 | C | 0 | 0      | A |
| 23 | BICF2P353597            | 12693231 | C | 0 | 0      | A |
| 23 | TIGRP2P299580_rs8546825 | 12696909 | A | 0 | 0      | G |
| 23 | TIGRP2P299587_rs9050290 | 12714139 | A | 0 | 0      | G |
| 23 | BICF2P1328827           | 12728560 | C | 0 | 0      | A |



|    |                         |          |   |   |        |   |
|----|-------------------------|----------|---|---|--------|---|
| 23 | BICF2P1328813           | 12730636 | G | 0 | 0      | A |
| 23 | BICF2P737801            | 12745916 | A | 1 | 0.4286 | G |
| 23 | BICF2P737803            | 12746477 | A | 1 | 1      | G |
| 23 | BICF2P571681            | 12750926 | G | 1 | 0.4286 | A |
| 23 | BICF2S23017789          | 12758348 | A | 1 | 0.4286 | G |
| 23 | BICF2S23712570          | 12768507 | A | 0 | 0      | G |
| 23 | TIGRP2P299628_rs8787479 | 12780782 | A | 0 | 0      | G |
| 23 | BICF2S23647894          | 12799702 | G | 0 | 0      | A |
| 23 | BICF2G630389019         | 12812958 | A | 0 | 0.5714 | G |
| 23 | BICF2P1360807           | 12822697 | A | 0 | 0      | G |
| 23 | BICF2G630388996         | 12842544 | G | 1 | 1      | A |
| 23 | TIGRP2P299645_rs8767247 | 12847260 | 0 | 0 | 0      | G |
| 23 | BICF2G630388963         | 12862412 | A | 0 | 0      | G |
| 23 | BICF2S23761157          | 12868600 | A | 1 | 1      | G |
| 23 | BICF2G630388942         | 12889255 | G | 1 | 1      | A |
| 23 | BICF2G630388900         | 12908552 | G | 0 | 0      | A |
| 23 | BICF2G630388866         | 12918790 | A | 0 | 0      | G |
| 23 | BICF2G630388848         | 12937438 | C | 1 | 0.4286 | G |
| 23 | BICF2G630388815         | 12949058 | A | 0 | 0.5714 | C |
| 23 | BICF2S23730424          | 12966846 | G | 0 | 0      | A |
| 23 | BICF2P713757            | 12974546 | G | 1 | 0.4286 | A |
| 23 | BICF2G630388755         | 12993046 | A | 0 | 0.5714 | G |
| 23 | BICF2G630388754         | 13000253 | G | 1 | 0.4286 | A |
| 23 | BICF2P349247            | 13006583 | A | 0 | 0      | G |
| 23 | BICF2P33801             | 13036054 | C | 0 | 0      | A |
| 23 | TIGRP2P299678_rs8883414 | 13046041 | G | 0 | 0      | A |
| 23 | BICF2S23114837          | 13065958 | A | 0 | 0      | G |
| 23 | BICF2S2308542           | 13100888 | A | 0 | 0.5714 | G |
| 23 | BICF2G630388690         | 13120973 | A | 0 | 0      | C |
| 23 | BICF2G630388683         | 13143918 | A | 0 | 0      | G |
| 23 | BICF2G630388664         | 13150380 | G | 1 | 1      | A |
| 23 | BICF2G630388658         | 13157074 | A | 0 | 0      | G |
| 23 | BICF2G630388616         | 13172717 | A | 1 | 1      | G |
| 23 | BICF2G630388586         | 13180293 | A | 1 | 1      | G |
| 23 | BICF2P714588            | 13200638 | 0 | 0 | 0      | G |
| 23 | BICF2G630388543         | 13202232 | A | 1 | 0.4167 | G |
| 23 | BICF2S2442370           | 13221172 | 0 | 0 | 0      | A |
| 23 | BICF2S22953180          | 13236053 | A | 0 | 0      | G |
| 23 | BICF2P768034            | 13237090 | G | 0 | 0      | A |
| 23 | BICF2G630388525         | 13251935 | C | 0 | 0      | A |
| 23 | BICF2G630388516         | 13260183 | G | 0 | 0      | A |
| 23 | BICF2P999117            | 13278113 | G | 0 | 0      | A |
| 23 | BICF2P920267            | 13292203 | 0 | 0 | 0      | G |
| 23 | BICF2S22960748          | 13316399 | A | 1 | 0.4286 | G |
| 23 | TIGRP2P299724_rs9048654 | 13318526 | G | 0 | 0.5714 | A |
| 23 | BICF2P739575            | 13330274 | A | 1 | 0.4286 | G |
| 23 | BICF2P779587            | 13342151 | C | 0 | 0      | A |

|    |                         |          |   |   |        |   |
|----|-------------------------|----------|---|---|--------|---|
| 23 | BICF2P1319858           | 13357682 | G | 0 | 0      | A |
| 23 | BICF2G630388501         | 13364316 | G | 0 | 0      | A |
| 23 | BICF2G630388487         | 13378582 | A | 1 | 1      | G |
| 23 | BICF2G630388477         | 13391627 | C | 0 | 0      | G |
| 23 | BICF2S23159592          | 13401945 | A | 0 | 0      | G |
| 23 | BICF2G630388450         | 13417500 | A | 0 | 0      | G |
| 23 | BICF2P174015            | 13428038 | A | 1 | 1      | G |
| 23 | BICF2P1248509           | 13436052 | 0 | 0 | 0      | G |
| 23 | BICF2G630388436         | 13444701 | A | 0 | 0      | G |
| 23 | BICF2P644050            | 13448596 | G | 0 | 0      | A |
| 23 | BICF2S23658653          | 13456902 | A | 0 | 0      | G |
| 23 | BICF2P506643            | 13481802 | A | 0 | 0      | G |
| 23 | BICF2S23015125          | 13496557 | G | 0 | 0      | A |
| 23 | BICF2P656073            | 13501974 | C | 0 | 0      | A |
| 23 | BICF2G630388428         | 13513721 | A | 0 | 0      | C |
| 23 | BICF2P168945            | 13513862 | A | 0 | 0      | G |
| 23 | BICF2G630388420         | 13522502 | A | 0 | 0      | G |
| 23 | BICF2G630388401         | 13540444 | G | 0 | 0      | A |
| 23 | BICF2P235523            | 13540817 | A | 0 | 0      | G |
| 23 | TIGRP2P299781_rs8506915 | 13550627 | A | 0 | 0      | G |
| 23 | BICF2G630388393         | 13559569 | G | 1 | 1      | A |
| 23 | BICF2G630388384         | 13577184 | G | 1 | 0.4286 | A |
| 23 | BICF2G630388374         | 13589064 | A | 1 | 0.4286 | G |
| 23 | BICF2P57479             | 13602588 | A | 1 | 1      | G |
| 23 | BICF2P1343741           | 13607418 | A | 1 | 1      | G |
| 23 | BICF2G630388359         | 13616282 | G | 0 | 0.5714 | A |
| 23 | BICF2S23133113          | 13628530 | G | 0 | 0.5714 | A |
| 23 | BICF2P705868            | 13681574 | 0 | 0 | 0      | G |
| 23 | G1224f46S277            | 13717694 | G | 0 | 0      | A |
| 23 | BICF2P703210            | 13759777 | A | 0 | 0      | G |
| 23 | BICF2P873514            | 13774031 | A | 0 | 0      | G |
| 23 | BICF2G630388350         | 13791938 | A | 0 | 0      | T |
| 23 | BICF2P873761            | 13801536 | 0 | 0 | 0      | G |
| 23 | BICF2S23623709          | 13826023 | G | 0 | 0      | A |
| 23 | BICF2S23623992          | 13837843 | A | 0 | 0      | C |
| 23 | BICF2P527422            | 13877203 | 0 | 0 | 0      | G |
| 23 | BICF2G630388347         | 13883916 | G | 0 | 0.2857 | A |
| 23 | BICF2G630388326         | 13913510 | A | 0 | 0      | G |
| 23 | BICF2G630388318         | 13917729 | G | 0 | 0.2857 | C |
| 23 | BICF2G630388294         | 13933331 | G | 0 | 0      | A |
| 23 | BICF2G630388289         | 13940046 | A | 0 | 0      | G |
| 23 | BICF2G630388273         | 13951931 | A | 0 | 0      | G |
| 23 | BICF2G630388260         | 13961068 | 0 | 0 | 0      | A |
| 23 | BICF2G630388226         | 13995934 | A | 0 | 0.2857 | C |
| 23 | BICF2G630388216         | 14024726 | G | 0 | 0      | A |
| 23 | TIGRP2P299827_rs8848646 | 14039429 | 0 | 0 | 0      | A |
| 23 | TIGRP2P299828_rs8695485 | 14050592 | A | 0 | 0      | G |

|    |                         |          |   |   |        |   |
|----|-------------------------|----------|---|---|--------|---|
| 23 | BICF2P1102893           | 14058398 | A | 0 | 0      | T |
| 23 | BICF2S233244            | 14067564 | G | 0 | 0      | A |
| 23 | BICF2P1434665           | 14081356 | A | 0 | 0.2857 | G |
| 23 | BICF2P1243355           | 14088148 | A | 0 | 0      | G |
| 23 | BICF2P703150            | 14103406 | A | 0 | 0.2857 | G |
| 23 | BICF2P438054            | 14118704 | T | 0 | 0.2857 | A |
| 23 | BICF2S23432401          | 14122174 | G | 0 | 0.2857 | A |
| 23 | BICF2G630388199         | 14135595 | A | 0 | 0      | G |
| 23 | BICF2G630388193         | 14162576 | A | 0 | 0      | C |
| 23 | BICF2G630388188         | 14173383 | 0 | 0 | 0      | T |
| 23 | BICF2G630388165         | 14188772 | G | 0 | 0      | A |
| 23 | TIGRP2P299870_rs9075210 | 14195533 | G | 1 | 0.7143 | A |
| 23 | BICF2P529175            | 14202619 | 0 | 0 | 0      | G |
| 23 | G1225f9S73              | 14217509 | G | 1 | 0.7143 | A |
| 23 | BICF2P121746            | 14257029 | A | 0 | 0      | G |
| 23 | BICF2G630388134         | 14265678 | G | 1 | 1      | A |
| 23 | BICF2G630388126         | 14275103 | T | 0 | 0      | A |
| 23 | BICF2G630388113         | 14283538 | A | 0 | 0      | G |
| 23 | BICF2G630388088         | 14295342 | C | 1 | 1      | A |
| 23 | BICF2G630388061         | 14308042 | A | 0 | 0      | G |
| 23 | BICF2G630388039         | 14320735 | A | 0 | 0.2857 | G |
| 23 | TIGRP2P299892_rs8507909 | 14335776 | A | 0 | 0      | G |
| 23 | TIGRP2P299897_rs8808059 | 14344790 | G | 1 | 0.7143 | A |
| 23 | BICF2G630388038         | 14356134 | A | 0 | 0      | G |
| 23 | BICF2G630388020         | 14384656 | A | 0 | 0      | G |
| 23 | BICF2G630388013         | 14388325 | A | 0 | 0.2857 | C |
| 23 | BICF2G630387983         | 14404977 | A | 0 | 0.5714 | G |
| 23 | BICF2P561341            | 14419647 | A | 0 | 0.5714 | C |
| 23 | BICF2P838047            | 14421360 | G | 0 | 0.5714 | A |
| 23 | BICF2G630387956         | 14430753 | A | 0 | 0      | G |
| 23 | TIGRP2P299917_rs8660166 | 14440644 | A | 0 | 0.5714 | G |
| 23 | BICF2G630387942         | 14446021 | A | 0 | 0      | C |
| 23 | BICF2G630387927         | 14455751 | C | 0 | 0      | A |
| 23 | TIGRP2P299920_rs9188298 | 14476966 | 0 | 0 | 0      | C |
| 23 | BICF2P1112425           | 14483634 | 0 | 0 | 0      | G |
| 23 | BICF2G630387902         | 14509037 | G | 0 | 0.2857 | A |
| 23 | BICF2G630387865         | 14523217 | G | 0 | 0.2857 | A |
| 23 | BICF2S23256189          | 14531079 | 0 | 0 | 0      | G |
| 23 | BICF2G630387853         | 14538727 | A | 0 | 0.2857 | G |
| 23 | BICF2G630387838         | 14552636 | C | 0 | 0.2857 | G |
| 23 | BICF2G630387828         | 14560853 | G | 0 | 0      | A |
| 23 | BICF2P103681            | 14573000 | C | 0 | 0      | A |
| 23 | BICF2G630387803         | 14590995 | A | 0 | 0.25   | C |
| 23 | BICF2G630387801         | 14596181 | C | 0 | 0.6667 | A |
| 23 | BICF2G630387781         | 14605472 | G | 0 | 0.5714 | A |
| 23 | BICF2P1100245           | 14617807 | G | 1 | 0.4286 | A |
| 23 | BICF2S23236951          | 14622550 | A | 0 | 0      | G |

|    |                         |          |   |   |        |   |
|----|-------------------------|----------|---|---|--------|---|
| 23 | BICF2G630387748         | 14625020 | A | 0 | 0.2857 | C |
| 23 | BICF2G630387744         | 14630616 | A | 0 | 0      | G |
| 23 | BICF2G630387736         | 14640738 | A | 0 | 0      | C |
| 23 | BICF2G630387719         | 14655513 | G | 0 | 0      | A |
| 23 | BICF2G630387708         | 14666950 | A | 0 | 0.2857 | G |
| 23 | BICF2G630387684         | 14685479 | G | 1 | 0.7143 | C |
| 23 | BICF2P1403142           | 14689956 | A | 0 | 0      | G |
| 23 | BICF2G630387647         | 14706722 | A | 0 | 0      | G |
| 23 | BICF2G630387645         | 14709678 | A | 0 | 0      | C |
| 23 | BICF2G630387630         | 14723520 | A | 1 | 1      | G |
| 23 | BICF2G630387624         | 14731871 | C | 1 | 0.7143 | A |
| 23 | BICF2G630387605         | 14748388 | G | 1 | 0.7143 | A |
| 23 | BICF2G630387599         | 14754684 | A | 0 | 0      | C |
| 23 | BICF2G630387588         | 14767370 | G | 0 | 0      | A |
| 23 | BICF2P521370            | 14780878 | 0 | 0 | 0      | C |
| 23 | BICF2P1463538           | 14791545 | A | 0 | 0.2857 | G |
| 23 | BICF2P1075391           | 14804842 | G | 0 | 0.2857 | A |
| 23 | BICF2P509772            | 14807846 | G | 0 | 0.2857 | A |
| 23 | TIGRP2P299965_rs8805357 | 14813206 | 0 | 0 | 0      | G |
| 23 | BICF2P919477            | 14833910 | G | 0 | 0      | C |
| 23 | BICF2P892292            | 14835877 | G | 0 | 0      | C |
| 23 | BICF2S23621532          | 14856863 | G | 0 | 0.2857 | A |
| 23 | BICF2G630387557         | 14867876 | A | 1 | 0.7143 | G |
| 23 | BICF2G630387542         | 14890912 | A | 1 | 0.7143 | G |
| 23 | BICF2G630387537         | 14899866 | A | 0 | 0      | G |
| 23 | BICF2G630387535         | 14905565 | A | 1 | 0.7143 | G |
| 23 | TIGRP2P299989_rs8783011 | 14912897 | A | 0 | 0      | G |
| 23 | BICF2G630387531         | 14922103 | A | 0 | 0.2857 | G |
| 23 | BICF2G630387515         | 14937648 | A | 1 | 0.7143 | G |
| 23 | BICF2G630387510         | 14942006 | G | 1 | 0.75   | A |
| 23 | TIGRP2P300002_rs9055354 | 14955412 | 0 | 0 | 0      | G |
| 23 | BICF2G630387465         | 14988622 | A | 0 | 0      | G |
| 23 | BICF2G630387462         | 14996189 | G | 0 | 0      | A |
| 23 | BICF2G630387454         | 15000962 | G | 0 | 0      | A |
| 23 | BICF2P627286            | 15004664 | A | 0 | 0      | T |
| 23 | BICF2G630387439         | 15011565 | A | 0 | 0      | C |
| 23 | BICF2P1187542           | 15024467 | 0 | 0 | 0      | T |
| 23 | BICF2G630387421         | 15033720 | A | 1 | 0.7143 | G |
| 23 | BICF2P529408            | 15034533 | A | 0 | 0      | G |
| 23 | BICF2G630387419         | 15034703 | A | 1 | 0.7143 | G |
| 23 | BICF2P384584            | 15037916 | A | 0 | 0      | C |
| 23 | BICF2G630387398         | 15042984 | G | 0 | 0.2857 | A |
| 23 | BICF2G630387369         | 15057787 | A | 0 | 0      | G |
| 23 | BICF2G630387359         | 15069806 | A | 1 | 0.7143 | G |
| 23 | BICF2G630387340         | 15074188 | A | 1 | 0.7143 | G |
| 23 | BICF2P932719            | 15077989 | G | 0 | 0      | A |
| 23 | BICF2G630387333         | 15078147 | G | 1 | 0.7143 | A |

|    |                         |          |   |   |        |   |
|----|-------------------------|----------|---|---|--------|---|
| 23 | TIGRP2P300037_rs9023803 | 15094697 | A | 0 | 0      | C |
| 23 | BICF2P634690            | 15110698 | A | 0 | 0.2857 | G |
| 23 | BICF2G630387320         | 15112204 | C | 0 | 0.2857 | A |
| 23 | BICF2P893758            | 15126881 | A | 0 | 0      | G |
| 23 | BICF2P280620            | 15136096 | A | 0 | 0      | G |
| 23 | BICF2P389488            | 15151191 | A | 1 | 0.4286 | G |
| 23 | BICF2P201470            | 15158587 | 0 | 0 | 0      | A |
| 23 | BICF2P787648            | 15184780 | 0 | 0 | 0      | A |
| 23 | BICF2S22919742          | 15201523 | A | 0 | 0      | G |
| 23 | BICF2P698814            | 15234456 | A | 0 | 0.5714 | G |
| 23 | BICF2P283404            | 15240218 | A | 1 | 0.4286 | G |
| 23 | TIGRP2P300084_rs8914997 | 15256997 | A | 0 | 0.5714 | G |
| 23 | BICF2P1252256           | 15271327 | G | 0 | 0.5714 | A |
| 23 | BICF2G630387315         | 15275696 | A | 0 | 0      | G |
| 23 | BICF2G630387313         | 15286963 | A | 0 | 0      | G |
| 23 | BICF2G630387308         | 15302082 | C | 0 | 0      | A |
| 23 | BICF2G630387307         | 15306898 | A | 0 | 0      | G |
| 23 | BICF2G630387303         | 15328615 | A | 0 | 0      | G |
| 23 | TIGRP2P300096_rs8995691 | 15330522 | A | 0 | 0      | G |
| 23 | BICF2G630387293         | 15344086 | C | 0 | 0      | A |
| 23 | BICF2G630387269         | 15357518 | G | 0 | 0      | A |
| 23 | BICF2G630387260         | 15364661 | A | 0 | 0.5714 | G |
| 23 | BICF2S23252380          | 15375570 | A | 0 | 0.2857 | G |
| 23 | BICF2G630387234         | 15390083 | G | 0 | 0.5714 | A |
| 23 | BICF2S23521798          | 15394503 | A | 0 | 0      | G |
| 23 | BICF2P1178949           | 15422403 | C | 0 | 0      | A |
| 23 | BICF2S2306376           | 15439033 | A | 0 | 0      | G |
| 23 | BICF2P1368425           | 15454865 | G | 0 | 0      | A |
| 23 | BICF2S23525108          | 15462508 | G | 1 | 1      | A |
| 23 | BICF2G630387193         | 15470296 | A | 0 | 0      | G |
| 23 | BICF2G630387189         | 15488674 | A | 1 | 0.4286 | C |
| 23 | BICF2S23150972          | 15490749 | G | 0 | 0.5714 | A |
| 23 | BICF2S23447886          | 15506555 | A | 0 | 0      | G |
| 23 | BICF2P720250            | 15517465 | A | 0 | 0      | G |
| 23 | TIGRP2P300137_rs9155965 | 15521951 | A | 0 | 0      | G |
| 23 | BICF2P273541            | 15538652 | C | 1 | 1      | G |
| 23 | BICF2G630387170         | 15555098 | A | 0 | 0      | G |
| 23 | BICF2G630387149         | 15564759 | T | 0 | 0      | A |
| 23 | BICF2G630387143         | 15572305 | G | 0 | 0.2857 | A |
| 23 | BICF2G630387111         | 15590244 | G | 0 | 0.25   | A |
| 23 | BICF2G630387097         | 15599848 | C | 0 | 0.2857 | A |
| 23 | TIGRP2P300176_rs8844750 | 15613013 | 0 | 0 | 0      | G |
| 23 | TIGRP2P300177_rs9101273 | 15618050 | G | 0 | 0.2857 | A |
| 23 | BICF2G630387091         | 15636409 | A | 0 | 0.2857 | T |
| 23 | BICF2G630387088         | 15674219 | C | 0 | 0.2857 | A |
| 23 | BICF2G630387079         | 15678971 | A | 0 | 0.5714 | G |
| 23 | BICF2G630387066         | 15688420 | A | 1 | 0.4286 | G |

|    |                         |          |   |   |        |   |
|----|-------------------------|----------|---|---|--------|---|
| 23 | BICF2G630387056         | 15698182 | A | 1 | 0.4286 | G |
| 23 | BICF2G630387032         | 15711403 | A | 1 | 0.4286 | T |
| 23 | BICF2G630387010         | 15731894 | G | 0 | 0.5714 | A |
| 23 | BICF2G630387006         | 15746727 | G | 0 | 0      | A |
| 23 | BICF2P446828            | 15762380 | A | 0 | 0      | G |
| 23 | BICF2G630386992         | 15775868 | G | 0 | 0.25   | A |
| 23 | BICF2G630386989         | 15784429 | G | 0 | 0      | A |
| 23 | BICF2G630386967         | 15794361 | A | 0 | 0      | G |
| 23 | BICF2S23720906          | 15803168 | A | 1 | 0.7143 | G |
| 23 | BICF2G630386953         | 15815792 | G | 0 | 0.25   | A |
| 23 | BICF2P1005915           | 15825310 | A | 0 | 0.5714 | G |
| 23 | BICF2P635994            | 15852485 | A | 0 | 0.5714 | G |
| 23 | BICF2G630386878         | 15861383 | A | 0 | 0      | C |
| 23 | TIGRP2P300209_rs9097403 | 15862294 | G | 1 | 0.4286 | A |
| 23 | BICF2P381851            | 15862347 | A | 1 | 0.4286 | T |
| 23 | BICF2G630386857         | 15871276 | A | 0 | 0.5714 | G |
| 23 | BICF2G630386842         | 15884532 | A | 0 | 0      | G |
| 23 | BICF2P950006            | 15904328 | A | 0 | 0.5714 | G |
| 23 | BICF2G630386804         | 15907894 | G | 0 | 0.5714 | A |
| 23 | BICF2G630386785         | 15913986 | G | 0 | 0.5714 | A |
| 23 | BICF2G630386777         | 15917751 | G | 0 | 0      | A |
| 23 | BICF2P1384740           | 15924066 | G | 0 | 0.2857 | A |
| 23 | BICF2G630386742         | 15937238 | A | 0 | 0      | G |
| 23 | BICF2G630386739         | 15939254 | G | 0 | 0      | A |
| 23 | BICF2G630386714         | 15944217 | G | 0 | 0      | A |
| 23 | BICF2G630386689         | 15959714 | C | 0 | 0.2857 | A |
| 23 | BICF2G630386652         | 15984748 | G | 0 | 0.2857 | A |
| 23 | BICF2G630386651         | 15984775 | G | 0 | 0.2857 | C |
| 23 | BICF2G630386641         | 15987307 | C | 0 | 0      | A |
| 23 | BICF2G630386636         | 15989207 | C | 0 | 0      | A |
| 23 | BICF2P1408273           | 15996850 | A | 0 | 0      | G |
| 23 | BICF2G630386589         | 16009363 | G | 0 | 0.2857 | A |
| 23 | TIGRP2P300262_rs9192061 | 16015775 | G | 0 | 0      | A |
| 23 | BICF2G630386583         | 16022372 | G | 0 | 0.2857 | A |
| 23 | BICF2P662033            | 16033956 | G | 0 | 0.2857 | A |
| 23 | BICF2G630386561         | 16042731 | A | 1 | 0.7143 | G |
| 23 | BICF2G630386538         | 16054899 | A | 1 | 0.7143 | C |
| 23 | BICF2P1366944           | 16069394 | A | 0 | 0      | G |
| 23 | TIGRP2P300287_rs9063093 | 16081824 | G | 0 | 0      | A |
| 23 | BICF2P849507            | 16093462 | A | 0 | 0      | G |
| 23 | BICF2S2361033           | 16109695 | A | 0 | 0      | G |
| 23 | TIGRP2P300306_rs8993214 | 16119787 | A | 0 | 0      | G |
| 23 | TIGRP2P300310_rs9158098 | 16133908 | G | 0 | 0      | A |
| 23 | BICF2G630386522         | 16138368 | G | 0 | 0      | A |
| 23 | BICF2G630386515         | 16153360 | A | 1 | 0.7143 | G |
| 23 | BICF2G630386510         | 16159398 | A | 0 | 0.25   | C |
| 23 | BICF2S237705            | 16169502 | A | 0 | 0      | G |

|    |                         |          |   |   |        |   |
|----|-------------------------|----------|---|---|--------|---|
| 23 | BICF2G630386496         | 16184891 | G | 0 | 0      | A |
| 23 | TIGRP2P300340_rs9157291 | 16202918 | G | 0 | 0      | C |
| 23 | BICF2G630386488         | 16213514 | G | 1 | 0.7143 | A |
| 23 | BICF2G630386484         | 16216879 | G | 1 | 0.7143 | A |
| 23 | TIGRP2P300354_rs8621396 | 16252573 | A | 0 | 0      | C |
| 23 | BICF2G630386428         | 16264959 | G | 1 | 0.7143 | A |
| 23 | BICF2P1352926           | 16281479 | A | 0 | 0      | G |
| 23 | TIGRP2P300363_rs8997816 | 16284718 | G | 0 | 0.2857 | A |
| 23 | BICF2P474846            | 16298087 | A | 0 | 0.2857 | C |
| 23 | BICF2P726974            | 16310543 | A | 0 | 0.2857 | C |
| 23 | BICF2P1349248           | 16324044 | A | 0 | 0.2857 | G |
| 23 | BICF2P1349249           | 16324196 | A | 0 | 0.2857 | G |
| 23 | BICF2S2301766           | 16340968 | G | 0 | 0.2857 | A |
| 23 | BICF2P80202             | 16347248 | G | 0 | 0      | A |
| 23 | BICF2P736426            | 16361067 | G | 0 | 0      | A |
| 23 | TIGRP2P300414_rs9041015 | 16368872 | C | 0 | 0      | A |
| 23 | BICF2P1129003           | 16381885 | A | 0 | 0      | G |
| 23 | BICF2S23237115          | 16387769 | G | 0 | 0      | A |
| 23 | BICF2P942314            | 16387903 | A | 0 | 0      | G |
| 23 | BICF2P579692            | 16400586 | C | 0 | 0      | A |
| 23 | BICF2G630386401         | 16410708 | A | 0 | 0      | C |
| 23 | BICF2G630386347         | 16429125 | A | 1 | 0.5    | G |
| 23 | BICF2G630386338         | 16434374 | A | 0 | 0.2857 | G |
| 23 | BICF2G630386319         | 16452962 | G | 1 | 0.7143 | A |
| 23 | BICF2G630386301         | 16459689 | A | 0 | 0      | G |
| 23 | BICF2S23161546          | 16469626 | A | 0 | 0      | G |
| 23 | TIGRP2P300444_rs9132922 | 16482917 | 0 | 0 | 0      | C |
| 23 | BICF2G630386288         | 16494430 | C | 1 | 0.7143 | G |
| 23 | BICF2G630386271         | 16500617 | A | 1 | 0.7143 | G |
| 23 | BICF2G630386261         | 16509768 | C | 1 | 0.7143 | A |
| 23 | BICF2P923689            | 16518236 | 0 | 0 | 0      | A |
| 23 | BICF2P932124            | 16528866 | A | 1 | 0.4286 | C |
| 23 | TIGRP2P300464_rs9101655 | 16543695 | 0 | 0 | 0      | G |
| 23 | TIGRP2P300466_rs8601774 | 16549178 | A | 1 | 1      | C |
| 23 | BICF2P288050            | 16567987 | A | 0 | 0.5714 | C |
| 23 | BICF2P95832             | 16576650 | 0 | 0 | 0      | G |
| 23 | BICF2S2346676           | 16593277 | A | 0 | 0.2857 | G |
| 23 | BICF2S23145882          | 16594131 | C | 0 | 0      | A |
| 23 | BICF2S22920976          | 16598685 | C | 0 | 0      | G |
| 23 | BICF2P3279              | 16607536 | G | 1 | 0.7143 | A |
| 23 | BICF2P1206292           | 16624068 | G | 1 | 1      | A |
| 23 | BICF2S2361298           | 16634220 | A | 1 | 0.4286 | G |
| 23 | BICF2P1300848           | 16651947 | A | 1 | 0.4286 | G |
| 23 | BICF2P1290986           | 16665647 | A | 1 | 0.4286 | G |
| 23 | BICF2P1171644           | 16686342 | A | 0 | 0.2857 | G |
| 23 | BICF2P438197            | 16688219 | A | 1 | 0.7143 | G |
| 23 | BICF2P1170551           | 16698283 | A | 1 | 0.7143 | G |

|    |                         |          |   |   |        |   |
|----|-------------------------|----------|---|---|--------|---|
| 23 | BICF2P615938            | 16717902 | A | 0 | 0      | T |
| 23 | BICF2G630386252         | 16729897 | G | 1 | 0.7143 | A |
| 23 | BICF2G630386232         | 16736541 | G | 0 | 0      | A |
| 23 | BICF2S23642305          | 16741543 | A | 1 | 0.4286 | G |
| 23 | BICF2G630386192         | 16754530 | A | 0 | 0      | T |
| 23 | BICF2G630386185         | 16758682 | G | 0 | 0      | A |
| 23 | TIGRP2P300515_rs8751238 | 16767540 | A | 0 | 0      | G |
| 23 | BICF2S23638839          | 16779118 | A | 0 | 0.5714 | G |
| 23 | BICF2S22917137          | 16794835 | T | 0 | 0.2857 | A |
| 23 | BICF2G630386126         | 16802956 | G | 0 | 0.2857 | A |
| 23 | BICF2P1187176           | 16821239 | A | 0 | 0      | G |
| 23 | BICF2P317987            | 16830445 | G | 1 | 0.7143 | A |
| 23 | BICF2G630386103         | 16841248 | A | 1 | 0.7143 | G |
| 23 | BICF2G630386082         | 16847918 | G | 0 | 0      | A |
| 23 | BICF2G630386078         | 16849044 | G | 0 | 0      | A |
| 23 | BICF2S23432737          | 16864867 | G | 0 | 0      | A |
| 23 | BICF2P118016            | 16873107 | G | 0 | 0      | A |
| 23 | BICF2G630386048         | 16873461 | A | 0 | 0      | G |
| 23 | BICF2G630386032         | 16882547 | A | 0 | 0.25   | G |
| 23 | BICF2G630386022         | 16896724 | A | 0 | 0.2    | C |
| 23 | BICF2G630385989         | 16905370 | G | 0 | 0      | A |
| 23 | BICF2G630385955         | 16920987 | C | 1 | 0.4286 | A |
| 23 | BICF2P374246            | 16929030 | C | 0 | 0.2857 | A |
| 23 | BICF2S23337473          | 16936863 | A | 1 | 0.7143 | G |
| 23 | BICF2S22953347          | 16949896 | C | 0 | 0      | A |
| 23 | BICF2S23333750          | 16952214 | G | 0 | 0      | A |
| 23 | BICF2P484060            | 16973009 | G | 1 | 1      | A |
| 23 | BICF2S23022989          | 16975594 | A | 1 | 0.7143 | G |
| 23 | TIGRP2P300564_rs9070676 | 16986474 | A | 0 | 0.2857 | G |
| 23 | BICF2P523990            | 16999528 | A | 0 | 0.2857 | G |
| 23 | BICF2P493380            | 17015189 | T | 1 | 0.7143 | A |
| 23 | BICF2P565738            | 17022631 | A | 0 | 0.5714 | G |
| 23 | BICF2G630385928         | 17040109 | A | 0 | 0      | C |
| 23 | BICF2G630385925         | 17045597 | A | 0 | 0      | G |
| 23 | BICF2G630385917         | 17058739 | A | 0 | 0      | C |
| 23 | BICF2G630385904         | 17069061 | A | 0 | 0      | G |
| 23 | BICF2G630385898         | 17072971 | A | 0 | 0      | G |
| 23 | BICF2G630385894         | 17078417 | G | 1 | 0.4286 | A |
| 23 | BICF2G630385880         | 17089234 | A | 0 | 0.5714 | G |
| 23 | BICF2G630385858         | 17101125 | A | 0 | 0      | G |
| 23 | BICF2G630385819         | 17115686 | A | 1 | 0.7143 | T |
| 23 | BICF2P698778            | 17132149 | 0 | 0 | 0      | A |
| 23 | BICF2G630385811         | 17145582 | A | 0 | 0      | C |
| 23 | BICF2G630385806         | 17148967 | C | 0 | 0.2857 | A |
| 23 | BICF2S23329353          | 17158198 | A | 0 | 0      | G |
| 23 | BICF2G630385769         | 17169961 | G | 0 | 0      | A |
| 23 | TIGRP2P300596_rs8561755 | 17188370 | A | 0 | 0      | G |



|    |                         |          |   |   |        |   |
|----|-------------------------|----------|---|---|--------|---|
| 23 | BICF2P1403575           | 17193879 | A | 0 | 0.2857 | G |
| 23 | BICF2P1093439           | 17212610 | G | 1 | 1      | A |
| 23 | BICF2S23035274          | 17216724 | A | 0 | 0.5714 | G |
| 23 | BICF2S2374493           | 17232545 | A | 0 | 0.2857 | G |
| 23 | BICF2G630385743         | 17244865 | A | 0 | 0      | C |
| 23 | BICF2G630385739         | 17250011 | A | 0 | 0      | G |
| 23 | BICF2G630385720         | 17261518 | G | 0 | 0.2857 | A |
| 23 | BICF2G630385685         | 17281974 | G | 0 | 0.2857 | A |
| 23 | BICF2G630385679         | 17286858 | G | 0 | 0      | A |
| 23 | BICF2P1422488           | 17313772 | A | 0 | 0.2857 | G |
| 23 | BICF2P563914            | 17320579 | A | 0 | 0.2857 | G |
| 23 | BICF2P866673            | 17338786 | A | 0 | 0      | G |
| 23 | BICF2P866674            | 17338803 | G | 0 | 0      | A |
| 23 | BICF2P274703            | 17339354 | G | 0 | 0      | A |
| 23 | BICF2S22949415          | 17349423 | C | 0 | 0.2857 | A |
| 23 | BICF2P269564            | 17371193 | A | 0 | 0.2857 | C |
| 23 | BICF2S23741412          | 17381890 | T | 0 | 0      | A |
| 23 | BICF2P600296            | 17400191 | A | 0 | 0      | G |
| 23 | BICF2P1512314           | 17417120 | G | 0 | 0.25   | A |
| 23 | BICF2P762549            | 17433059 | A | 0 | 0      | G |
| 23 | BICF2S22927692          | 17439927 | A | 0 | 0.5833 | G |
| 23 | BICF2P1386074           | 17455524 | A | 0 | 0      | G |
| 23 | BICF2G630385605         | 17462778 | A | 0 | 0      | G |
| 23 | BICF2P420342            | 17491052 | A | 0 | 0      | C |
| 23 | BICF2S23220637          | 17495071 | G | 0 | 0.2857 | A |
| 23 | TIGRP2P300659_rs9244752 | 17510427 | A | 0 | 0      | G |
| 23 | BICF2P607217            | 17524355 | 0 | 0 | 0      | A |
| 23 | BICF2P712208            | 17529318 | A | 0 | 0      | G |
| 23 | BICF2P456900            | 17547448 | A | 0 | 0      | G |
| 23 | BICF2P456901            | 17549814 | A | 0 | 0      | G |
| 23 | BICF2G630385570         | 17569721 | C | 0 | 0      | A |
| 23 | BICF2G630385566         | 17582185 | A | 0 | 0      | C |
| 23 | BICF2P542553            | 17594105 | A | 1 | 0.4167 | G |
| 23 | TIGRP2P300678_rs8947894 | 17603862 | G | 0 | 0      | A |
| 23 | TIGRP2P300679_rs9034727 | 17607118 | G | 0 | 0      | A |
| 23 | BICF2P317965            | 17618647 | 0 | 0 | 0      | A |
| 23 | TIGRP2P300694_rs9011261 | 17638020 | A | 0 | 0      | C |
| 23 | BICF2P692260            | 17647195 | G | 0 | 0      | A |
| 23 | TIGRP2P300697_rs9124454 | 17653233 | G | 0 | 0.2857 | A |
| 23 | BICF2P629295            | 17664944 | A | 0 | 0.2857 | G |
| 23 | BICF2G630385534         | 17682403 | A | 0 | 0.2857 | C |
| 23 | BICF2G630385527         | 17689983 | G | 0 | 0      | A |
| 23 | BICF2G630385518         | 17702344 | A | 1 | 0.4286 | G |
| 23 | BICF2G630385517         | 17702616 | G | 1 | 0.4286 | A |
| 23 | BICF2G630385500         | 17717078 | A | 1 | 0.4286 | G |
| 23 | BICF2G630385492         | 17729010 | C | 0 | 0      | A |
| 23 | BICF2G630385475         | 17745678 | C | 0 | 0      | G |

|    |                         |          |   |   |        |   |
|----|-------------------------|----------|---|---|--------|---|
| 23 | TIGRP2P300715_rs8935887 | 17759623 | G | 1 | 0.4286 | A |
| 23 | BICF2G630385462         | 17767914 | G | 0 | 0.2857 | A |
| 23 | BICF2G630385449         | 17779944 | G | 0 | 0      | A |
| 23 | BICF2G630385440         | 17791797 | A | 0 | 0      | G |
| 23 | BICF2P398735            | 17805502 | A | 1 | 0.4286 | G |
| 23 | BICF2P1117862           | 17816392 | G | 0 | 0      | A |
| 23 | BICF2G630385425         | 17826280 | A | 1 | 0.4286 | G |
| 23 | BICF2P301608            | 17839214 | 0 | 0 | 0      | A |
| 23 | BICF2G630385413         | 17859703 | A | 0 | 0      | C |
| 23 | BICF2P984189            | 17880042 | 0 | 0 | 0      | G |
| 23 | BICF2G630385410         | 17892421 | A | 0 | 0      | G |
| 23 | BICF2G630385408         | 17894737 | A | 0 | 0      | G |
| 23 | BICF2G630385391         | 17911177 | G | 0 | 0.2857 | A |
| 23 | BICF2G630385385         | 17914687 | G | 1 | 0.7143 | A |
| 23 | BICF2G630385381         | 17917198 | A | 0 | 0.2857 | G |
| 23 | BICF2G630385352         | 17939099 | G | 0 | 0.2857 | A |
| 23 | BICF2G630385346         | 17948384 | A | 0 | 0.2857 | G |
| 23 | TIGRP2P300736_rs8767639 | 17955842 | A | 1 | 0.7143 | G |
| 23 | BICF2P748069            | 17963037 | A | 1 | 0.7143 | G |
| 23 | BICF2G630385316         | 17976818 | C | 0 | 0      | A |
| 23 | BICF2G630385312         | 17981340 | 0 | 0 | 0      | C |
| 23 | TIGRP2P300757_rs9202894 | 17994414 | G | 1 | 0.7143 | A |
| 23 | BICF2P83710             | 17996347 | G | 1 | 0.7143 | A |
| 23 | BICF2G630385284         | 17998975 | 0 | 0 | 0      | A |
| 23 | BICF2G630385271         | 18009126 | 0 | 0 | 0      | A |
| 23 | BICF2S2328152           | 18020711 | A | 1 | 0.7143 | G |
| 23 | BICF2G630385254         | 18040327 | G | 1 | 1      | A |
| 23 | BICF2G630385219         | 18057196 | G | 0 | 0      | A |
| 23 | BICF2G630385216         | 18070508 | G | 1 | 0.7143 | A |
| 23 | TIGRP2P300774_rs9016596 | 18096816 | G | 0 | 0      | A |
| 23 | TIGRP2P300779_rs8701610 | 18102142 | G | 1 | 0.7143 | A |
| 23 | BICF2S23622108          | 18113010 | 0 | 0 | 0      | G |
| 23 | BICF2S23622109          | 18113290 | A | 1 | 0.7143 | C |
| 23 | BICF2G630385181         | 18124517 | A | 0 | 0      | C |
| 23 | BICF2G630385170         | 18137144 | G | 0 | 0.2857 | A |
| 23 | BICF2P325186            | 18159787 | G | 1 | 0.4286 | A |
| 23 | TIGRP2P300930_rs8614533 | 18200057 | A | 0 | 0      | G |
| 23 | BICF2P14552             | 18204986 | G | 0 | 0      | A |
| 23 | BICF2P183091            | 18216912 | C | 0 | 0      | A |
| 23 | BICF2P597804            | 18236483 | A | 0 | 0      | C |
| 23 | BICF2P606718            | 18248511 | 0 | 0 | 0      | A |
| 23 | BICF2G630385131         | 18258609 | A | 0 | 0      | G |
| 23 | BICF2G630385118         | 18267109 | A | 0 | 0      | G |
| 23 | BICF2G630385114         | 18267913 | A | 0 | 0      | G |
| 23 | BICF2G630385101         | 18272514 | G | 0 | 0      | A |
| 23 | BICF2G630385095         | 18273908 | A | 0 | 0      | G |
| 23 | BICF2S23313084          | 18300118 | A | 0 | 0.2857 | G |

|    |                         |          |   |   |        |   |
|----|-------------------------|----------|---|---|--------|---|
| 23 | BICF2G630385055         | 18304028 | G | 0 | 0.2857 | A |
| 23 | BICF2P1013597           | 18316674 | A | 0 | 0      | C |
| 23 | TIGRP2P300948_rs8798847 | 18320104 | 0 | 0 | 0      | A |
| 23 | BICF2G630385005         | 18331555 | A | 0 | 0      | G |
| 23 | BICF2P758809            | 18349420 | A | 0 | 0      | G |
| 23 | BICF2G630384970         | 18358610 | C | 0 | 0.2857 | A |
| 23 | BICF2G630384957         | 18366845 | A | 0 | 0      | G |
| 23 | BICF2S23026193          | 18378094 | A | 0 | 0      | G |
| 23 | BICF2P1147794           | 18396345 | A | 0 | 0      | G |
| 23 | TIGRP2P300975_rs9036760 | 18405186 | G | 0 | 0      | C |
| 23 | TIGRP2P300976_rs9006512 | 18413439 | 0 | 0 | 0      | G |
| 23 | BICF2G630384949         | 18452767 | G | 0 | 0      | A |
| 23 | BICF2G630384940         | 18458134 | A | 0 | 0      | G |
| 23 | BICF2G630384840         | 18496260 | A | 0 | 0.2857 | G |
| 23 | TIGRP2P301223_rs8623735 | 18503671 | 0 | 0 | 0      | C |
| 23 | BICF2G630384809         | 18516571 | G | 0 | 0      | A |
| 23 | BICF2P1307910           | 18546094 | A | 0 | 0      | G |
| 23 | BICF2P1431289           | 18550952 | A | 0 | 0      | G |
| 23 | BICF2G630384745         | 18579606 | C | 1 | 0.7143 | A |
| 23 | BICF2G630384738         | 18586235 | A | 0 | 0.2857 | G |
| 23 | BICF2G630384733         | 18595706 | G | 1 | 0.7143 | A |
| 23 | BICF2G630384716         | 18607178 | A | 1 | 0.7143 | G |
| 23 | BICF2G630384693         | 18626178 | A | 0 | 0.2857 | C |
| 23 | BICF2P540547            | 18639411 | A | 1 | 0.4286 | C |
| 23 | BICF2S23550088          | 18651305 | G | 0 | 0      | A |
| 23 | BICF2G630384675         | 18658972 | A | 1 | 0.4286 | G |
| 23 | BICF2P574869            | 18679285 | G | 1 | 0.4286 | C |
| 23 | BICF2S23216734          | 18694642 | G | 1 | 0.75   | A |
| 23 | BICF2G630384665         | 18702261 | G | 1 | 0.7143 | C |
| 23 | BICF2G630384662         | 18704619 | G | 1 | 0.4286 | A |
| 23 | BICF2G630384638         | 18725625 | A | 1 | 0.4286 | C |
| 23 | BICF2G630384631         | 18728624 | G | 1 | 0.4286 | A |
| 23 | BICF2G630384613         | 18738998 | C | 1 | 1      | A |
| 23 | BICF2P1235537           | 18748469 | 0 | 0 | 0      | A |
| 23 | BICF2P1334835           | 18770827 | A | 0 | 0      | G |
| 23 | BICF2G630384604         | 18788680 | G | 0 | 0.2857 | A |
| 23 | BICF2G630384602         | 18791366 | G | 0 | 0      | A |
| 23 | TIGRP2P301481_rs8558937 | 18810173 | A | 0 | 0      | G |
| 23 | BICF2G630384583         | 18815770 | G | 0 | 0      | A |
| 23 | BICF2G630384557         | 18830391 | G | 0 | 0      | A |
| 23 | BICF2G630384540         | 18840353 | A | 0 | 0      | G |
| 23 | BICF2G630384526         | 18853302 | G | 0 | 0      | A |
| 23 | BICF2G630384514         | 18861289 | T | 0 | 0      | A |
| 23 | BICF2G630384492         | 18880634 | A | 0 | 0      | G |
| 23 | BICF2G630384480         | 18894242 | A | 0 | 0      | G |
| 23 | BICF2G630384477         | 18895090 | G | 0 | 0      | A |
| 23 | BICF2G630384458         | 18909245 | A | 0 | 0      | G |

|    |                         |          |   |   |        |   |
|----|-------------------------|----------|---|---|--------|---|
| 23 | BICF2P654807            | 18923450 | C | 0 | 0      | A |
| 23 | BICF2G630384434         | 18934534 | G | 0 | 0      | A |
| 23 | BICF2G630384422         | 18940749 | A | 0 | 0      | G |
| 23 | BICF2G630384411         | 18955535 | A | 0 | 0.25   | G |
| 23 | BICF2G630384409         | 18968297 | A | 0 | 0.2857 | G |
| 23 | BICF2P1046642           | 18984946 | 0 | 0 | 0      | A |
| 23 | BICF2P656283            | 18995392 | 0 | 0 | 0      | G |
| 23 | BICF2G630384398         | 19011086 | T | 0 | 0      | A |
| 23 | BICF2P861569            | 19027045 | C | 0 | 0      | A |
| 23 | BICF2P1022624           | 19051424 | 0 | 0 | 0      | C |
| 23 | BICF2P240841            | 19074768 | G | 0 | 0      | A |
| 23 | BICF2P74676             | 19083440 | G | 0 | 0      | A |
| 23 | BICF2P754721            | 19090744 | G | 0 | 0      | A |
| 23 | BICF2P930791            | 19108608 | C | 0 | 0      | A |
| 23 | BICF2P1155416           | 19115189 | A | 0 | 0      | G |
| 23 | BICF2P1172507           | 19129433 | A | 0 | 0      | G |
| 23 | BICF2G630384390         | 19141332 | A | 0 | 0      | G |
| 23 | BICF2G630384387         | 19157224 | A | 0 | 0      | G |
| 23 | BICF2G630384383         | 19182347 | A | 0 | 0      | C |
| 23 | BICF2P197315            | 19195710 | 0 | 0 | 0      | G |
| 23 | TIGRP2P301507_rs9105316 | 19209549 | G | 0 | 0.5833 | A |
| 23 | TIGRP2P301513_rs8543908 | 19235709 | G | 1 | 0.4286 | A |
| 23 | BICF2S23521499          | 19240665 | G | 0 | 0.5714 | A |
| 23 | BICF2P1287648           | 19252270 | G | 0 | 0      | A |
| 23 | BICF2P922173            | 19266750 | A | 0 | 0      | C |
| 23 | BICF2S23058987          | 19276095 | A | 0 | 0.625  | G |
| 23 | BICF2S23057296          | 19277897 | A | 0 | 0.5714 | C |
| 23 | BICF2S23113952          | 19287390 | G | 0 | 0.5714 | A |
| 23 | TIGRP2P301527_rs9159141 | 19298629 | A | 0 | 0.5714 | G |
| 23 | BICF2P733201            | 19312251 | G | 0 | 0.5833 | A |
| 23 | BICF2P1358530           | 19325965 | A | 1 | 1      | G |
| 23 | BICF2S23160548          | 19328590 | 0 | 0 | 0      | A |
| 23 | BICF2P1510428           | 19331711 | G | 0 | 0.6    | A |
| 23 | BICF2P1215704           | 19344661 | G | 1 | 0.4286 | A |
| 23 | BICF2G630384353         | 19359123 | A | 0 | 0      | G |
| 23 | BICF2G630384339         | 19366843 | C | 1 | 1      | G |
| 23 | BICF2G630384309         | 19388798 | A | 1 | 1      | G |
| 23 | BICF2G630384300         | 19395012 | A | 0 | 0      | C |
| 23 | BICF2G630384295         | 19400730 | G | 0 | 0      | A |
| 23 | BICF2G630384261         | 19413563 | G | 1 | 1      | A |
| 23 | BICF2P514650            | 19415569 | G | 0 | 0      | A |
| 23 | BICF2P651705            | 19425905 | G | 1 | 1      | A |
| 23 | BICF2P737298            | 19432306 | A | 1 | 0.4167 | C |
| 23 | BICF2G630384209         | 19440473 | 0 | 0 | 0      | A |
| 23 | BICF2G630384185         | 19449516 | G | 1 | 0.4286 | A |
| 23 | BICF2G630384170         | 19459117 | A | 0 | 0.5714 | C |
| 23 | BICF2G630384141         | 19474945 | G | 0 | 0.5714 | C |

|    |                         |          |   |   |        |   |
|----|-------------------------|----------|---|---|--------|---|
| 23 | BICF2G630384140         | 19477041 | G | 0 | 0.5714 | A |
| 23 | BICF2P547785            | 19481461 | A | 1 | 0.4286 | G |
| 23 | BICF2G630384109         | 19495885 | A | 1 | 1      | G |
| 23 | BICF2G630384104         | 19516129 | G | 0 | 0      | A |
| 23 | BICF2G630384073         | 19532093 | G | 0 | 0      | A |
| 23 | BICF2G630384055         | 19541451 | G | 0 | 0.5714 | A |
| 23 | BICF2P416005            | 19550062 | G | 1 | 0.4286 | A |
| 23 | BICF2P1123884           | 19572572 | A | 1 | 0.4286 | G |
| 23 | BICF2G630384019         | 19576328 | G | 0 | 0      | A |
| 23 | BICF2G630383998         | 19594740 | G | 1 | 0.4286 | A |
| 23 | BICF2G630383995         | 19599831 | A | 0 | 0      | G |
| 23 | BICF2G630383983         | 19610814 | A | 1 | 1      | G |
| 23 | BICF2G630383965         | 19621062 | A | 0 | 0      | G |
| 23 | BICF2G630383946         | 19626772 | G | 0 | 0      | A |
| 23 | BICF2G630383904         | 19641724 | A | 0 | 0      | G |
| 23 | BICF2G630383893         | 19652067 | A | 1 | 1      | G |
| 23 | BICF2G630383891         | 19653924 | G | 1 | 1      | A |
| 23 | BICF2P944371            | 19668967 | A | 0 | 0      | G |
| 23 | BICF2P1130799           | 19676281 | G | 0 | 0      | A |
| 23 | BICF2G630383859         | 19678436 | C | 0 | 0      | A |
| 23 | BICF2P500727            | 19688996 | C | 0 | 0      | A |
| 23 | BICF2S22945215          | 19704177 | A | 0 | 0      | G |
| 23 | BICF2P1144829           | 19715147 | C | 0 | 0      | G |
| 23 | BICF2G630383845         | 19724629 | G | 0 | 0.2857 | A |
| 23 | BICF2G630383835         | 19734439 | C | 0 | 0.2857 | A |
| 23 | BICF2G630383827         | 19745551 | A | 0 | 0.2857 | G |
| 23 | BICF2G630383821         | 19759149 | G | 0 | 0.2857 | A |
| 23 | BICF2G630383814         | 19772580 | A | 0 | 0.25   | C |
| 23 | BICF2G630383805         | 19780420 | C | 0 | 0.2857 | A |
| 23 | TIGRP2P301650_rs8607970 | 19794044 | 0 | 0 | 0      | G |
| 23 | BICF2P33855             | 19811258 | G | 0 | 0      | A |
| 23 | TIGRP2P301652_rs8952624 | 19834039 | A | 1 | 1      | G |
| 23 | TIGRP2P301673_rs9139961 | 19858556 | G | 1 | 1      | A |
| 23 | BICF2G630383765         | 19861058 | A | 0 | 0      | G |
| 23 | BICF2G630383745         | 19875033 | A | 1 | 1      | G |
| 23 | BICF2P138669            | 19889837 | A | 1 | 1      | G |
| 23 | BICF2G630383731         | 19895456 | G | 1 | 1      | A |
| 23 | BICF2G630383716         | 19911934 | A | 0 | 0      | G |
| 23 | BICF2G630383703         | 19918839 | A | 0 | 0      | G |
| 23 | BICF2G630383695         | 19931870 | A | 0 | 0      | G |
| 23 | BICF2G630383693         | 19941689 | A | 0 | 0      | G |
| 23 | BICF2G630383685         | 19954634 | A | 0 | 0      | G |
| 23 | BICF2P817463            | 19971600 | A | 0 | 0      | G |
| 23 | BICF2G630383667         | 19982805 | A | 0 | 0      | G |
| 23 | BICF2G630383655         | 19996626 | A | 0 | 0      | C |
| 23 | BICF2G630383647         | 19999884 | G | 0 | 0      | A |
| 23 | BICF2S2347786           | 20017200 | G | 0 | 0      | A |

|    |                         |          |   |   |        |   |
|----|-------------------------|----------|---|---|--------|---|
| 23 | BICF2G630383612         | 20024084 | A | 0 | 0      | G |
| 23 | BICF2G630383609         | 20026309 | G | 0 | 0      | A |
| 23 | BICF2S23612414          | 20035095 | G | 0 | 0      | A |
| 23 | BICF2G630383606         | 20052349 | G | 0 | 0      | A |
| 23 | BICF2S23536624          | 20064712 | A | 0 | 0      | C |
| 23 | BICF2G630383597         | 20075830 | G | 0 | 0      | A |
| 23 | BICF2P681843            | 20086221 | G | 1 | 0.4286 | A |
| 23 | BICF2G630383590         | 20097278 | 0 | 0 | 0      | A |
| 23 | BICF2P461191            | 20109275 | A | 1 | 0.4286 | G |
| 23 | BICF2P1392524           | 20113668 | A | 1 | 0.7143 | G |
| 23 | BICF2G630383588         | 20130848 | A | 0 | 0.2857 | G |
| 23 | BICF2G630383580         | 20137877 | G | 1 | 0.4286 | A |
| 23 | TIGRP2P301707_rs8891786 | 20148578 | G | 0 | 0.2857 | A |
| 23 | BICF2G630383562         | 20164526 | A | 1 | 0.4286 | T |
| 23 | BICF2G630383560         | 20167735 | G | 1 | 0.4286 | A |
| 23 | TIGRP2P301712_rs8562251 | 20173796 | A | 0 | 0      | T |
| 23 | BICF2G630383523         | 20188717 | G | 0 | 0.2857 | A |
| 23 | BICF2P757350            | 20198195 | C | 0 | 0      | A |
| 23 | BICF2G630383469         | 20207212 | G | 0 | 0      | A |
| 23 | BICF2G630383440         | 20219892 | A | 0 | 0      | G |
| 23 | BICF2G630383430         | 20230613 | 0 | 0 | 0      | G |
| 23 | BICF2G630383415         | 20250964 | A | 0 | 0      | G |
| 23 | BICF2G630383407         | 20260789 | G | 0 | 0      | A |
| 23 | BICF2G630383397         | 20265292 | A | 0 | 0      | G |
| 23 | TIGRP2P301734_rs8539304 | 20277289 | A | 0 | 0      | G |
| 23 | BICF2G630383374         | 20290773 | A | 0 | 0      | G |
| 23 | BICF2G630383352         | 20298691 | A | 1 | 1      | C |
| 23 | BICF2P1233650           | 20318189 | C | 0 | 0      | A |
| 23 | TIGRP2P301774_rs8992887 | 20321775 | A | 0 | 0      | G |
| 23 | TIGRP2P301784_rs9246982 | 20338883 | A | 1 | 0.4286 | G |
| 23 | BICF2P764916            | 20344823 | A | 1 | 0.4286 | G |
| 23 | BICF2G630383347         | 20346189 | G | 1 | 0.4286 | A |
| 23 | BICF2G630383341         | 20356366 | G | 0 | 0      | A |
| 23 | BICF2P769358            | 20365056 | A | 1 | 0.4286 | C |
| 23 | TIGRP2P301814_rs8751588 | 20374104 | G | 0 | 0      | A |
| 23 | TIGRP2P301822_rs8781790 | 20379700 | A | 0 | 0      | G |
| 23 | TIGRP2P301826_rs8716583 | 20396981 | C | 1 | 0.4167 | G |
| 23 | TIGRP2P301827_rs8643358 | 20401113 | G | 1 | 0.4286 | A |
| 23 | BICF2G630383325         | 20423975 | A | 0 | 0.5714 | C |
| 23 | BICF2P910730            | 20444291 | G | 1 | 1      | A |
| 23 | BICF2P538031            | 20447665 | 0 | 0 | 0      | A |
| 23 | BICF2S23356727          | 20462668 | A | 0 | 0      | G |
| 23 | BICF2P74496             | 20475792 | A | 0 | 0      | C |
| 23 | BICF2P929025            | 20496193 | A | 0 | 0      | G |
| 23 | TIGRP2P301850_rs8967829 | 20509024 | G | 0 | 0      | A |
| 23 | BICF2G630383319         | 20511260 | A | 0 | 0      | G |
| 23 | BICF2G630383310         | 20522892 | A | 0 | 0      | G |

|    |                         |          |   |   |        |   |
|----|-------------------------|----------|---|---|--------|---|
| 23 | BICF2P1293225           | 20537313 | A | 0 | 0      | G |
| 23 | BICF2G630383308         | 20549219 | A | 1 | 0.4286 | C |
| 23 | BICF2G630383304         | 20555306 | G | 1 | 0.4286 | A |
| 23 | BICF2P633164            | 20577579 | A | 0 | 0      | G |
| 23 | BICF2P1113259           | 20594190 | 0 | 0 | 0      | G |
| 23 | BICF2G630383262         | 20598885 | A | 1 | 0.4286 | G |
| 23 | BICF2G630383230         | 20609890 | G | 1 | 0.4167 | A |
| 23 | BICF2G630383210         | 20619787 | A | 0 | 0      | C |
| 23 | BICF2G630383202         | 20627378 | A | 0 | 0      | G |
| 23 | BICF2G630383199         | 20631501 | C | 0 | 0      | A |
| 23 | TIGRP2P301888_rs8764554 | 20643201 | 0 | 0 | 0      | A |
| 23 | BICF2G630383184         | 20651610 | G | 0 | 0      | A |
| 23 | BICF2G630383183         | 20659675 | A | 0 | 0.5714 | G |
| 23 | BICF2P635645            | 20673572 | 0 | 0 | 0      | G |
| 23 | TIGRP2P301899_rs8638484 | 20682352 | 0 | 0 | 0      | C |
| 23 | BICF2P464922            | 20716112 | A | 0 | 0      | G |
| 23 | BICF2P955366            | 20728488 | A | 0 | 0      | G |
| 23 | BICF2S2312222           | 20744007 | C | 0 | 0      | A |
| 23 | BICF2S23633379          | 20757281 | A | 1 | 1      | G |
| 23 | TIGRP2P301927_rs9029523 | 20778762 | A | 0 | 0.5714 | G |
| 23 | BICF2S23449954          | 20786284 | A | 0 | 0      | G |
| 23 | BICF2P1163800           | 20796710 | 0 | 0 | 0      | G |
| 23 | BICF2P1162741           | 20814929 | A | 1 | 1      | T |
| 23 | BICF2S23347470          | 20819503 | G | 1 | 0.4286 | A |
| 23 | TIGRP2P301965_rs9081837 | 20827392 | G | 0 | 0      | A |
| 23 | BICF2S23437529          | 20840051 | G | 0 | 0      | A |
| 23 | BICF2P1212656           | 20851150 | A | 0 | 0      | G |
| 23 | BICF2P1149222           | 20862121 | 0 | 0 | 0      | G |
| 23 | BICF2S23711265          | 20873428 | A | 1 | 1      | G |
| 23 | BICF2P719753            | 20901414 | G | 0 | 0      | A |
| 23 | BICF2P295141            | 20907007 | 0 | 0 | 0      | C |
| 23 | BICF2S22926292          | 20919967 | 0 | 0 | 0      | G |
| 23 | BICF2P973492            | 20945758 | 0 | 0 | 0      | A |
| 23 | BICF2P746688            | 20966308 | A | 0 | 0      | G |
| 23 | BICF2G630383160         | 20980348 | A | 0 | 0      | C |
| 23 | TIGRP2P301997_rs9112207 | 20999984 | G | 0 | 0.2857 | A |
| 23 | BICF2P171744            | 21017329 | A | 1 | 0.4286 | G |
| 23 | BICF2G630383138         | 21026096 | A | 1 | 0.4286 | G |
| 23 | BICF2P121775            | 21038542 | C | 1 | 0.4286 | A |
| 23 | BICF2G630383125         | 21048857 | G | 1 | 0.4286 | A |
| 23 | BICF2P594716            | 21059312 | 0 | 0 | 0      | A |
| 23 | BICF2G630383078         | 21068744 | G | 0 | 0      | A |
| 23 | BICF2G630383061         | 21080884 | C | 0 | 0      | A |
| 23 | BICF2G630383059         | 21081702 | G | 0 | 0      | A |
| 23 | BICF2G630383054         | 21096484 | A | 0 | 0      | G |
| 23 | TIGRP2P302026_rs8504435 | 21103163 | 0 | 0 | 0      | A |
| 23 | BICF2G630383043         | 21119369 | A | 0 | 0      | C |

|    |                         |          |   |    |        |   |
|----|-------------------------|----------|---|----|--------|---|
| 23 | BICF2G630383032         | 21133037 | A | NA | 0.4167 | G |
| 23 | BICF2G630383021         | 21147798 | G | 1  | 0.4286 | A |
| 23 | TIGRP2P302042_rs8905222 | 21156134 | G | 0  | 0      | A |
| 23 | BICF2P548370            | 21162077 | 0 | 0  | 0      | A |
| 23 | BICF2S23758855          | 21178530 | G | 1  | 0.4286 | A |
| 23 | BICF2P925420            | 21187223 | A | 0  | 0      | C |
| 23 | BICF2G630383016         | 21194908 | G | 0  | 0      | A |
| 23 | BICF2G630382991         | 21220077 | A | 1  | 0.4286 | G |
| 23 | BICF2S23640184          | 21230817 | G | 0  | 0.2857 | A |
| 23 | BICF2G630382980         | 21247992 | A | 0  | 0.2857 | G |
| 23 | BICF2G630382974         | 21253804 | A | 1  | 0.4286 | G |
| 23 | TIGRP2P302056_rs9071575 | 21263972 | 0 | 0  | 0      | G |
| 23 | BICF2G630382907         | 21279840 | A | 0  | 0.2857 | G |
| 23 | BICF2S23535428          | 21291300 | G | 0  | 0      | A |
| 23 | BICF2G630382878         | 21301983 | G | 0  | 0      | A |
| 23 | BICF2G630382871         | 21303651 | G | 0  | 0      | A |
| 23 | BICF2P380860            | 21318783 | G | 0  | 0      | A |
| 23 | TIGRP2P302064_rs9142948 | 21326792 | G | 1  | 0.7143 | A |
| 23 | BICF2G630382857         | 21343361 | A | 0  | 0.2857 | G |
| 23 | BICF2G630382851         | 21345701 | A | 0  | 0.2857 | C |
| 23 | BICF2G630382839         | 21362287 | A | 0  | 0      | G |
| 23 | BICF2G630382824         | 21377710 | T | 0  | 0.2857 | A |
| 23 | BICF2G630382813         | 21390276 | A | 1  | 0.7143 | G |
| 23 | BICF2G630382793         | 21407711 | A | 0  | 0      | G |
| 23 | BICF2G630382783         | 21414504 | A | 0  | 0      | G |
| 23 | BICF2G630382772         | 21428731 | A | 0  | 0      | G |
| 23 | BICF2G630382768         | 21444096 | C | 0  | 0      | A |
| 23 | BICF2G630382763         | 21451235 | G | 1  | 0.4286 | A |
| 23 | TIGRP2P302087_rs9029532 | 21463501 | A | 0  | 0      | G |
| 23 | BICF2P1357867           | 21478926 | C | 1  | 0.4167 | A |
| 23 | TIGRP2P302092_rs8516024 | 21488048 | C | 0  | 0      | A |
| 23 | BICF2G630382762         | 21494234 | G | 0  | 0      | A |
| 23 | BICF2P418501            | 21514723 | A | 0  | 0      | G |
| 23 | BICF2S23141564          | 21526392 | A | 1  | 0.4286 | G |
| 23 | BICF2P582671            | 21535740 | A | 0  | 0      | G |
| 23 | BICF2P488607            | 21545117 | C | 1  | 0.4286 | G |
| 23 | BICF2P158981            | 21557518 | A | 0  | 0      | C |
| 23 | BICF2P1456617           | 21570178 | G | 1  | 0.4286 | A |
| 23 | TIGRP2P302118_rs8713480 | 21581103 | G | 1  | 0.4286 | A |
| 23 | TIGRP2P302123_rs8715408 | 21595163 | A | 0  | 0      | G |
| 23 | BICF2G630382760         | 21607113 | A | 0  | 0      | C |
| 23 | BICF2G630382746         | 21611069 | A | 1  | 0.4286 | G |
| 23 | BICF2G630382701         | 21627817 | G | 0  | 0      | A |
| 23 | BICF2G630382697         | 21632323 | A | 0  | 0      | G |
| 23 | BICF2G630382686         | 21644352 | A | 1  | 0.4286 | G |
| 23 | TIGRP2P302136_rs8988765 | 21659470 | 0 | 0  | 0      | G |
| 23 | BICF2S23553425          | 21686510 | G | 1  | 0.7143 | A |



|    |                         |          |   |   |        |   |
|----|-------------------------|----------|---|---|--------|---|
| 23 | BICF2S23553426          | 21686577 | G | 1 | 0.7143 | A |
| 23 | BICF2G630382633         | 21691509 | A | 1 | 0.75   | G |
| 23 | BICF2P198412            | 21717665 | G | 0 | 0.2857 | A |
| 23 | BICF2P490846            | 21752790 | 0 | 0 | 0      | C |
| 23 | BICF2G630382623         | 21766532 | G | 1 | 0.7143 | A |
| 23 | BICF2G630382613         | 21769854 | G | 1 | 0.7143 | A |
| 23 | BICF2G630382592         | 21790809 | G | 0 | 0      | A |
| 23 | BICF2G630382591         | 21803832 | G | 0 | 0      | A |
| 23 | BICF2S2339013           | 21811469 | 0 | 0 | 0      | G |
| 23 | BICF2G630382580         | 21811732 | C | 0 | 0      | A |
| 23 | BICF2G630382578         | 21815023 | C | 0 | 0      | G |
| 23 | BICF2G630382577         | 21816738 | G | 0 | 0      | A |
| 23 | BICF2S2359727           | 21836622 | G | 0 | 0      | A |
| 23 | BICF2S24412647          | 21842962 | G | 0 | 0      | A |
| 23 | BICF2P825233            | 21850496 | 0 | 0 | 0      | A |
| 23 | BICF2G630382550         | 21869964 | 0 | 0 | 0      | A |
| 23 | BICF2G630382544         | 21883296 | G | 1 | 0.4286 | A |
| 23 | BICF2G630382538         | 21885985 | 0 | 0 | 0      | G |
| 23 | BICF2S23338454          | 21903449 | A | 0 | 0      | G |
| 23 | BICF2G630382531         | 21912008 | 0 | 0 | 0      | A |
| 23 | TIGRP2P302164_rs9211636 | 21927998 | G | 0 | 0      | A |
| 23 | BICF2G630382500         | 21933857 | 0 | 0 | 0      | G |
| 23 | BICF2P306571            | 21934033 | A | 0 | 0      | G |
| 23 | BICF2G630382462         | 21956379 | A | 0 | 0      | G |
| 23 | BICF2G630382453         | 21959707 | 0 | 0 | 0      | A |
| 23 | BICF2G630382447         | 21965087 | G | 0 | 0      | A |
| 23 | TIGRP2P302173_rs9205278 | 21978000 | 0 | 0 | 0      | G |
| 23 | BICF2G630382435         | 21999079 | G | 0 | 0      | A |
| 23 | BICF2S23527187          | 22009466 | G | 0 | 0.5714 | A |
| 23 | BICF2G630382426         | 22018835 | C | 0 | 0      | A |
| 23 | BICF2S22958130          | 22028723 | A | 0 | 0      | T |
| 23 | TIGRP2P302178_rs8693541 | 22042177 | A | 0 | 0.5714 | G |
| 23 | BICF2S22917701          | 22057004 | A | 1 | 0.4286 | G |
| 23 | BICF2P220486            | 22075918 | G | 0 | 0      | A |
| 23 | BICF2G630382418         | 22093772 | A | 0 | 0      | G |
| 23 | BICF2G630382395         | 22111034 | A | 0 | 0      | G |
| 23 | TIGRP2P302205_rs9250893 | 22129626 | G | 1 | 1      | A |
| 23 | BICF2G630382382         | 22138085 | G | 0 | 0      | A |
| 23 | BICF2P165461            | 22149968 | T | 1 | 1      | A |
| 23 | BICF2P599737            | 22171804 | A | 1 | 1      | G |
| 23 | BICF2P33658             | 22178991 | A | 1 | 1      | G |
| 23 | BICF2G630382378         | 22194236 | C | 0 | 0      | A |
| 23 | BICF2G630382359         | 22206255 | A | 0 | 0      | G |
| 23 | BICF2G630382356         | 22208283 | G | 0 | 0      | A |
| 23 | BICF2G630382343         | 22218847 | C | 0 | 0      | A |
| 23 | BICF2G630382319         | 22230804 | 0 | 0 | 0      | G |
| 23 | BICF2P294128            | 22245681 | A | 1 | 0.4286 | G |

|    |                         |          |   |   |        |   |
|----|-------------------------|----------|---|---|--------|---|
| 23 | BICF2G630382308         | 22255604 | G | 0 | 0      | A |
| 23 | BICF2G630382289         | 22271188 | C | 0 | 0      | A |
| 23 | BICF2G630382280         | 22275997 | C | 0 | 0      | A |
| 23 | BICF2G630382261         | 22295685 | A | 1 | 1      | C |
| 23 | BICF2P368602            | 22320404 | G | 1 | 1      | C |
| 23 | BICF2P368601            | 22320521 | A | 0 | 0      | G |
| 23 | BICF2G630382208         | 22334613 | 0 | 0 | 0      | G |
| 23 | TIGRP2P302241_rs9029508 | 22354581 | G | 0 | 0      | C |
| 23 | BICF2G630382179         | 22359993 | A | 0 | 0.5714 | G |
| 23 | BICF2G630382173         | 22368389 | G | 0 | 0      | A |
| 23 | BICF2G630382147         | 22383382 | A | 0 | 0.5714 | G |
| 23 | TIGRP2P302244_rs9025495 | 22392577 | T | 0 | 0      | A |
| 23 | TIGRP2P302246_rs9076099 | 22402002 | A | 0 | 0.5714 | G |
| 23 | TIGRP2P302248_rs8615684 | 22415849 | A | 0 | 0.5714 | G |
| 23 | BICF2G630382118         | 22426723 | 0 | 0 | 0      | G |
| 23 | BICF2P754476            | 22438899 | G | 0 | 0      | A |
| 23 | BICF2G630382096         | 22451288 | 0 | 0 | 0      | G |
| 23 | TIGRP2P302259_rs8937018 | 22463462 | A | 0 | 0.5714 | C |
| 23 | BICF2G630382078         | 22472468 | A | 0 | 0      | G |
| 23 | BICF2S22946949          | 22489378 | A | 0 | 0      | G |
| 23 | BICF2P1266419           | 22494198 | A | 0 | 0.5714 | G |
| 23 | BICF2G630382054         | 22515352 | G | 0 | 0      | A |
| 23 | TIGRP2P302268_rs9102531 | 22519291 | C | 0 | 0      | A |
| 23 | BICF2G630382044         | 22530097 | G | 0 | 0      | A |
| 23 | BICF2G630382029         | 22549845 | A | 0 | 0      | G |
| 23 | TIGRP2P302277_rs8839817 | 22556416 | A | 0 | 0      | G |
| 23 | BICF2G630381983         | 22572549 | A | 1 | 1      | G |
| 23 | BICF2S23321993          | 22578884 | A | 0 | 0.5714 | G |
| 23 | BICF2G630381968         | 22586626 | A | 0 | 0      | G |
| 23 | BICF2G630381958         | 22604161 | G | 0 | 0      | A |
| 23 | BICF2G630381936         | 22618804 | C | 1 | 0.4286 | A |
| 23 | TIGRP2P302290_rs9054973 | 22630735 | A | 0 | 0.5714 | G |
| 23 | BICF2G630381925         | 22633095 | G | 1 | 0.4286 | A |
| 23 | BICF2P234647            | 22647777 | A | 1 | 0.4286 | C |
| 23 | BICF2P1123548           | 22658166 | A | 0 | 0      | G |
| 23 | BICF2G630381909         | 22677466 | A | 1 | 0.4286 | G |
| 23 | BICF2G630381873         | 22689149 | A | 1 | 0.4286 | T |
| 23 | BICF2G630381871         | 22692599 | A | 0 | 0      | G |
| 23 | BICF2G630381860         | 22712107 | G | 0 | 0      | A |
| 23 | BICF2G630381856         | 22720474 | A | 0 | 0      | C |
| 23 | BICF2P879255            | 22732413 | G | 0 | 0      | A |
| 23 | TIGRP2P302313_rs8909536 | 22744662 | G | 0 | 0.5714 | A |
| 23 | TIGRP2P302317_rs8580026 | 22757511 | G | 0 | 0.5714 | A |
| 23 | BICF2S23624543          | 22763505 | A | 0 | 0      | G |
| 23 | BICF2P1017615           | 22774005 | A | 1 | 0.4286 | C |
| 23 | BICF2S235489            | 22774698 | G | 0 | 0.5714 | A |
| 23 | BICF2P146755            | 22781677 | G | 1 | 1      | A |

|    |                         |          |   |   |        |   |
|----|-------------------------|----------|---|---|--------|---|
| 23 | BICF2P852201            | 22793222 | A | 1 | 0.4286 | C |
| 23 | TIGRP2P302341_rs9124258 | 22810230 | G | 1 | 0.4286 | A |
| 23 | BICF2G630381847         | 22830426 | C | 0 | 0.5714 | A |
| 23 | BICF2S2306              | 22846781 | G | 0 | 0      | A |
| 23 | BICF2S23136192          | 22857723 | C | 0 | 0.5714 | A |
| 23 | BICF2G630381844         | 22872695 | A | 0 | 0.5714 | C |
| 23 | BICF2G630381840         | 22881597 | C | 0 | 0      | A |
| 23 | BICF2G630381824         | 22897333 | G | 0 | 0      | C |
| 23 | BICF2G630381821         | 22911461 | A | 0 | 0      | C |
| 23 | BICF2G630381811         | 22930688 | C | 0 | 0      | A |
| 23 | TIGRP2P302347_rs8851601 | 22934339 | G | 0 | 0      | A |
| 23 | BICF2G630381798         | 22948574 | A | 0 | 0      | G |
| 23 | BICF2G630381793         | 22961853 | A | 0 | 0      | G |
| 23 | BICF2G630381789         | 22976377 | C | 0 | 0.5714 | A |
| 23 | BICF2G630381782         | 22986974 | C | 0 | 0.2857 | A |
| 23 | BICF2P530711            | 22989710 | G | 0 | 0.2857 | A |
| 23 | BICF2G630381762         | 23001851 | C | 0 | 0      | A |
| 23 | BICF2P805449            | 23018155 | A | 0 | 0.5714 | G |
| 23 | BICF2S23129968          | 23018237 | G | 0 | 0.5714 | A |
| 23 | TIGRP2P302366_rs9056989 | 23030227 | G | 0 | 0.5714 | A |
| 23 | TIGRP2P302374_rs9083354 | 23054065 | A | 0 | 0.5714 | G |
| 23 | BICF2G630381727         | 23066499 | 0 | 0 | 0      | A |
| 23 | BICF2S23135127          | 23070933 | A | 0 | 0      | C |
| 23 | BICF2G630381726         | 23083819 | 0 | 0 | 0      | A |
| 23 | BICF2P455081            | 23096198 | G | 0 | 0      | A |
| 23 | BICF2P1286674           | 23104327 | A | 0 | 0.2857 | C |
| 23 | BICF2G630381724         | 23116139 | G | 1 | 1      | A |
| 23 | BICF2G630381697         | 23137673 | G | 0 | 0      | A |
| 23 | BICF2G630381692         | 23138561 | G | 1 | 1      | A |
| 23 | BICF2G630381678         | 23153223 | A | 0 | 0      | G |
| 23 | BICF2P595519            | 23165550 | G | 0 | 0.2857 | A |
| 23 | BICF2P1411308           | 23174941 | G | 1 | 1      | A |
| 23 | BICF2S23138693          | 23188778 | G | 0 | 0.2857 | A |
| 23 | TIGRP2P302430_rs9124860 | 23198358 | A | 1 | 1      | G |
| 23 | BICF2S23714312          | 23209255 | A | 0 | 0.2857 | C |
| 23 | BICF2S23552506          | 23223791 | A | 1 | 0.7143 | G |
| 23 | BICF2P1338624           | 23235497 | A | 0 | 0.2857 | C |
| 23 | BICF2G630381674         | 23250086 | 0 | 0 | 0      | A |
| 23 | BICF2P925969            | 23264165 | C | 1 | 0.7143 | G |
| 23 | BICF2P315772            | 23284795 | 0 | 0 | 0      | C |
| 23 | BICF2P734605            | 23293303 | A | 0 | 0.2857 | G |
| 23 | BICF2P233873            | 23307917 | A | 0 | 0.2857 | G |
| 23 | BICF2S23646712          | 23314136 | A | 0 | 0      | G |
| 23 | BICF2G630381664         | 23323135 | G | 0 | 0      | A |
| 23 | BICF2G630381647         | 23346717 | A | 0 | 0      | G |
| 23 | BICF2G630381640         | 23357390 | G | 1 | 1      | A |
| 23 | BICF2P778105            | 23372992 | G | 0 | 0      | A |

|    |                         |          |   |      |        |   |
|----|-------------------------|----------|---|------|--------|---|
| 23 | BICF2G630381628         | 23380828 | A | 0    | 0      | G |
| 23 | BICF2G630381621         | 23391018 | A | 1    | 1      | G |
| 23 | BICF2G630381615         | 23407475 | A | 0    | 0      | C |
| 23 | BICF2G630381611         | 23415376 | G | 0    | 0      | A |
| 23 | BICF2G630381608         | 23425736 | G | 0    | 0      | A |
| 23 | BICF2G630381593         | 23442384 | G | 0    | 0      | A |
| 23 | BICF2P942170            | 23459073 | A | 0    | 0      | G |
| 23 | TIGRP2P302474_rs9194425 | 23465840 | A | 1    | 0.7143 | G |
| 23 | BICF2G630381579         | 23471519 | G | 1    | 1      | A |
| 23 | BICF2G630381567         | 23488191 | G | 0    | 0.2857 | A |
| 23 | BICF2G630381564         | 23496718 | G | 0    | 0      | A |
| 23 | BICF2P1275567           | 23510457 | A | 0    | 0      | G |
| 23 | BICF2S23352502          | 23518157 | C | 1    | 1      | G |
| 23 | BICF2G630381537         | 23529060 | G | 1    | 1      | A |
| 23 | BICF2P561533            | 23548246 | A | 0    | 0.2857 | G |
| 23 | TIGRP2P302484_rs8634236 | 23552745 | G | 0.25 | 0.2143 | A |
| 23 | TIGRP2P302498_rs8985428 | 23564132 | C | 0.25 | 0.25   | A |
| 23 | BICF2G630381500         | 23578208 | A | 0    | 0.2857 | G |
| 23 | BICF2G630381491         | 23596960 | A | 0    | 0.2857 | G |
| 23 | TIGRP2P302532_rs8697494 | 23598082 | C | 0.5  | 0.3    | A |
| 23 | BICF2G630381332         | 23705960 | A | 0    | 0      | G |
| 23 | TIGRP2P302741_rs8617142 | 23739641 | C | 0    | 0.2857 | A |
| 23 | BICF2P1142502           | 23800667 | A | 0    | 0      | C |
| 23 | BICF2P334698            | 23814499 | A | 0    | 0.2857 | G |
| 23 | TIGRP2P302807_rs9080409 | 23816910 | G | 0    | 0.2857 | A |
| 23 | BICF2P86555             | 23841896 | A | 0    | 0      | G |
| 23 | BICF2G630381271         | 23851997 | G | 0    | 0      | A |
| 23 | BICF2P590608            | 23868999 | A | 0    | 0.25   | G |
| 23 | BICF2G630381259         | 23875980 | A | 0    | 0      | G |
| 23 | BICF2G630381236         | 23894781 | G | 0    | 0      | A |
| 23 | BICF2G630381235         | 23897101 | G | 0    | 0      | A |
| 23 | TIGRP2P302825_rs8502759 | 23908818 | A | 0    | 0      | G |
| 23 | BICF2G630381190         | 23925470 | G | 0    | 0      | A |
| 23 | BICF2G630381178         | 23936254 | A | 0    | 0      | C |
| 23 | BICF2G630381160         | 23944630 | A | 0    | 0.2857 | G |
| 23 | BICF2G630381147         | 23955343 | G | 0    | 0.5833 | A |
| 23 | BICF2G630381100         | 23975324 | G | 0    | 0.5714 | A |
| 23 | BICF2G630381098         | 23982434 | G | 0    | 0.5714 | A |
| 23 | BICF2G630381029         | 24002151 | A | 0    | 0      | G |
| 23 | TIGRP2P302863_rs9146509 | 24026264 | A | 1    | 0.4286 | G |
| 23 | BICF2G630381013         | 24047353 | G | 0    | 0      | A |
| 23 | BICF2G630381008         | 24062262 | A | 0    | 0      | G |
| 23 | BICF2G630380998         | 24072683 | 0 | 0    | 0      | G |
| 23 | BICF2G630380986         | 24082682 | A | 0    | 0      | C |
| 23 | BICF2G630380960         | 24099533 | G | 1    | 0.4286 | A |
| 23 | BICF2G630380950         | 24106837 | A | 1    | 0.4167 | G |
| 23 | BICF2G630380937         | 24120135 | A | 0    | 0      | C |

|    |                         |          |   |   |        |   |
|----|-------------------------|----------|---|---|--------|---|
| 23 | BICF2S2365214           | 24127258 | A | 0 | 0      | G |
| 23 | BICF2P1324685           | 24141964 | A | 1 | 1      | G |
| 23 | BICF2P1306927           | 24150393 | A | 1 | 1      | C |
| 23 | TIGRP2P302876_rs8665047 | 24169733 | 0 | 0 | 0      | C |
| 23 | BICF2P442589            | 24184144 | C | 0 | 0      | A |
| 23 | BICF2G630380884         | 24186590 | C | 0 | 0      | A |
| 23 | BICF2P1033627           | 24196470 | C | 0 | 0.5833 | A |
| 23 | BICF2G630380876         | 24209047 | A | 0 | 0      | C |
| 23 | BICF2G630380872         | 24223198 | G | 0 | 0.2857 | A |
| 23 | BICF2P1007368           | 24235458 | A | 0 | 0      | G |
| 23 | BICF2P581922            | 24246581 | T | 1 | 1      | A |
| 23 | BICF2S22958487          | 24257070 | A | 1 | 0.7143 | G |
| 23 | BICF2G630380853         | 24274079 | C | 0 | 0      | A |
| 23 | TIGRP2P302904_rs8552184 | 24278874 | A | 1 | 0.8    | C |
| 23 | BICF2G630380839         | 24288899 | G | 1 | 0.4286 | C |
| 23 | BICF2G630380822         | 24313909 | A | 0 | 0      | G |
| 23 | BICF2G630380818         | 24340706 | A | 1 | 1      | C |
| 23 | BICF2P222568            | 24355584 | 0 | 0 | 0      | A |
| 23 | BICF2S23346780          | 24358216 | C | 1 | 1      | A |
| 23 | BICF2S23030526          | 24371390 | A | 1 | 1      | C |
| 23 | BICF2S23036406          | 24384498 | 0 | 0 | 0      | G |
| 23 | BICF2S23356324          | 24400151 | G | 0 | 0      | A |
| 23 | TIGRP2P302923_rs8781625 | 24412721 | 0 | 0 | 0      | A |
| 23 | BICF2S23026482          | 24418025 | 0 | 0 | 0      | G |
| 23 | BICF2P70979             | 24438974 | G | 0 | 0      | A |
| 23 | BICF2P1257461           | 24454833 | G | 1 | 0.7143 | A |
| 23 | TIGRP2P302925_rs9030206 | 24463680 | 0 | 0 | 0      | A |
| 23 | BICF2P1421801           | 24473051 | G | 0 | 0      | A |
| 23 | TIGRP2P302926_rs8742360 | 24495770 | A | 0 | 0.2857 | G |
| 23 | BICF2G630380802         | 24509384 | G | 0 | 0.2857 | A |
| 23 | BICF2G630380775         | 24520753 | G | 0 | 0      | A |
| 23 | TIGRP2P302933_rs9001725 | 24550815 | 0 | 0 | 0      | C |
| 23 | BICF2P381481            | 24564548 | G | 1 | 0.4167 | A |
| 23 | BICF2P531343            | 24580362 | T | 1 | 0.7143 | A |
| 23 | TIGRP2P302941_rs8753699 | 24587379 | A | 1 | 0.7143 | G |
| 23 | BICF2G630380705         | 24624941 | G | 0 | 0      | A |
| 23 | BICF2G630380700         | 24635812 | G | 0 | 0      | A |
| 23 | BICF2G630380697         | 24644676 | A | 0 | 0      | G |
| 23 | BICF2G630380676         | 24658041 | 0 | 0 | 0      | C |
| 23 | BICF2P331141            | 24678764 | A | 1 | 0.4286 | G |
| 23 | BICF2G630380670         | 24682246 | A | 1 | 0.4286 | G |
| 23 | BICF2G630380643         | 24710664 | G | 1 | 0.4286 | A |
| 23 | BICF2G630380642         | 24710743 | G | 1 | 0.4286 | A |
| 23 | BICF2G630380638         | 24720606 | G | 0 | 0.5714 | A |
| 23 | BICF2G630380625         | 24733215 | G | 1 | 0.4286 | A |
| 23 | BICF2P843643            | 24736732 | A | 1 | 0.4286 | G |
| 23 | BICF2G630380587         | 24752157 | A | 1 | 0.4167 | G |

|    |                         |          |   |   |        |   |
|----|-------------------------|----------|---|---|--------|---|
| 23 | BICF2G630380558         | 24769478 | A | 1 | 0.4286 | G |
| 23 | BICF2G630380550         | 24772199 | G | 1 | 0.4286 | A |
| 23 | BICF2S2448799           | 24793955 | C | 0 | 0      | A |
| 23 | TIGRP2P302958_rs8929225 | 24801615 | A | 0 | 0.2857 | C |
| 23 | TIGRP2P302959_rs8962565 | 24813115 | A | 0 | 0.2857 | G |
| 23 | BICF2P795723            | 24817769 | A | 0 | 0.2857 | G |
| 23 | BICF2P219627            | 24832051 | A | 1 | 0.4286 | G |
| 23 | BICF2G630380516         | 24842855 | A | 0 | 0      | G |
| 23 | BICF2G630380513         | 24845592 | A | 1 | 1      | G |
| 23 | BICF2G630380508         | 24849259 | A | 1 | 0.4286 | G |
| 23 | BICF2G630380502         | 24852548 | A | 1 | 0.4286 | G |
| 23 | BICF2P169421            | 24866061 | A | 1 | 0.7143 | G |
| 23 | BICF2G630380457         | 24880714 | A | 1 | 0.4286 | G |
| 23 | BICF2G630380438         | 24887444 | G | 1 | 0.4286 | A |
| 23 | BICF2G630380432         | 24897780 | A | 1 | 0.7143 | G |
| 23 | BICF2G630380425         | 24921960 | A | 0 | 0      | C |
| 23 | BICF2S22922601          | 24934745 | G | 1 | 1      | A |
| 23 | BICF2G630380408         | 24943975 | G | 0 | 0.5714 | A |
| 23 | BICF2P878589            | 24957394 | C | 0 | 0      | A |
| 23 | BICF2G630380378         | 24967203 | A | 1 | 0.4286 | G |
| 23 | BICF2G630380373         | 24983779 | A | 0 | 0.5833 | G |
| 23 | BICF2P885833            | 24999314 | A | 0 | 0      | G |
| 23 | BICF2P1311064           | 25011512 | A | 1 | 0.4286 | G |
| 23 | BICF2G630380369         | 25013399 | A | 0 | 0.2857 | G |
| 23 | BICF2G630380350         | 25026096 | A | 0 | 0.2857 | G |
| 23 | BICF2P648768            | 25038807 | A | 1 | 0.7143 | C |
| 23 | BICF2P1110387           | 25053591 | A | 1 | 0.4167 | C |
| 23 | BICF2G630380322         | 25058176 | G | 1 | 0.4286 | A |
| 23 | BICF2G630380315         | 25060595 | A | 1 | 0.4286 | G |
| 23 | TIGRP2P303020_rs9086183 | 25073892 | A | 0 | 0      | G |
| 23 | TIGRP2P303032_rs8942826 | 25087945 | A | 1 | 0.4286 | G |
| 23 | BICF2G630380267         | 25094278 | C | 1 | 0.7143 | A |
| 23 | BICF2G630380251         | 25105951 | G | 0 | 0.2857 | A |
| 23 | BICF2G630380247         | 25123142 | A | 1 | 0.4286 | G |
| 23 | BICF2G630380228         | 25140652 | A | 1 | 0.4286 | G |
| 23 | BICF2G630380216         | 25153199 | G | 1 | 0.4286 | A |
| 23 | BICF2G630380209         | 25164368 | A | 1 | 0.4286 | G |
| 23 | BICF2G630380186         | 25175605 | A | 1 | 0.4286 | G |
| 23 | BICF2G630380173         | 25200952 | G | 0 | 0.2857 | A |
| 23 | BICF2G630380156         | 25210165 | A | 1 | 0.75   | C |
| 23 | TIGRP2P303054_rs8518757 | 25244580 | C | 0 | 0.2857 | A |
| 23 | BICF2G630380127         | 25260254 | G | 0 | 0.5714 | A |
| 23 | BICF2P40509             | 25272641 | 0 | 0 | 0      | G |
| 23 | BICF2P1386737           | 25283748 | A | 0 | 0.5714 | G |
| 23 | BICF2G630380113         | 25313552 | A | 0 | 0      | C |
| 23 | G1226f18S149            | 25339496 | 0 | 0 | 0      | C |
| 23 | TIGRP2P303062_rs9108791 | 25353707 | 0 | 0 | 0      | A |

|    |                         |          |   |   |        |   |
|----|-------------------------|----------|---|---|--------|---|
| 23 | BICF2G630380111         | 25357696 | A | 0 | 0      | G |
| 23 | BICF2G630380082         | 25375190 | C | 0 | 0      | A |
| 23 | BICF2P1166841           | 25395556 | 0 | 0 | 0      | G |
| 23 | BICF2G630380065         | 25410441 | C | 0 | 0      | G |
| 23 | BICF2P272118            | 25418222 | 0 | 0 | 0      | C |
| 23 | BICF2P1084165           | 25434453 | A | 1 | 0.7143 | G |
| 23 | BICF2P577113            | 25439571 | A | 1 | 0.7143 | C |
| 23 | BICF2P231017            | 25452121 | 0 | 0 | 0      | A |
| 23 | BICF2G630380060         | 25468254 | A | 1 | 1      | C |
| 23 | BICF2G630380046         | 25475417 | G | 0 | 0      | A |
| 23 | TIGRP2P303066_rs8994652 | 25486339 | A | 0 | 0      | C |
| 23 | TIGRP2P303070_rs9229445 | 25501493 | G | 0 | 0      | A |
| 23 | BICF2P1510499           | 25508967 | A | 1 | 0.7143 | G |
| 23 | TIGRP2P303074_rs9052886 | 25524143 | T | 1 | 0.7143 | A |
| 23 | TIGRP2P303076_rs8922618 | 25540305 | C | 1 | 0.7143 | A |
| 23 | TIGRP2P303077_rs8910819 | 25542480 | A | 1 | 0.7143 | G |
| 23 | BICF2P840338            | 25561437 | A | 1 | 0.3571 | G |
| 23 | TIGRP2P303090_rs8877953 | 25581850 | G | 0 | 0      | A |
| 23 | BICF2P1391539           | 25597429 | C | 1 | 0.3333 | A |
| 23 | BICF2S23623483          | 25603935 | A | 0 | 0      | G |
| 23 | TIGRP2P303106_rs9021008 | 25617027 | G | 0 | 0      | A |
| 23 | TIGRP2P303111_rs9042301 | 25625060 | G | 1 | 0.3    | A |
| 23 | BICF2P140358            | 25642658 | C | 0 | 0.2857 | A |
| 23 | BICF2G630380032         | 25651038 | G | 0 | 0.2857 | C |
| 23 | BICF2S23128008          | 25673071 | A | 0 | 0      | G |
| 23 | BICF2P805683            | 25682329 | 0 | 0 | 0      | A |
| 23 | BICF2G630380030         | 25692294 | A | 0 | 0.2857 | G |
| 23 | BICF2G630380026         | 25704786 | G | 0 | 0      | A |
| 23 | BICF2G630379979         | 25724518 | A | 0 | 0      | G |
| 23 | BICF2G630379968         | 25734019 | G | 0 | 0.3571 | A |
| 23 | BICF2G630379960         | 25745702 | G | 1 | 0.7143 | A |
| 23 | BICF2G630379955         | 25748778 | A | 1 | 0.7143 | G |
| 23 | BICF2P610549            | 25767919 | G | 1 | 0.3571 | A |
| 23 | BICF2G630379931         | 25779263 | G | 0 | 0      | A |
| 23 | TIGRP2P303140_rs9105795 | 25784580 | A | 1 | 0.3571 | G |
| 23 | BICF2G630379908         | 25802254 | 0 | 0 | 0      | A |
| 23 | BICF2P526260            | 25809335 | 0 | 0 | 0      | C |
| 23 | BICF2S23428487          | 25819096 | A | 0 | 0      | G |
| 23 | BICF2G630379893         | 25832880 | G | 0 | 0      | A |
| 23 | BICF2P1328325           | 25845103 | G | 1 | 0.3571 | A |
| 23 | BICF2G630379884         | 25862027 | A | 0 | 0.6429 | G |
| 23 | BICF2P230469            | 25867451 | A | 0 | 0.2857 | G |
| 23 | BICF2G630379878         | 25883180 | A | 0 | 0.2857 | G |
| 23 | BICF2G630379873         | 25893229 | G | 0 | 0.2857 | A |
| 23 | BICF2G630379864         | 25918473 | A | 0 | 0      | G |
| 23 | BICF2G630379855         | 25936523 | G | 1 | 1      | A |
| 23 | BICF2G630379850         | 25946849 | A | 0 | 0.2857 | G |

|    |                         |          |   |   |        |   |
|----|-------------------------|----------|---|---|--------|---|
| 23 | BICF2G630379845         | 25957446 | G | 1 | 1      | A |
| 23 | BICF2G630379816         | 25981328 | G | 1 | 1      | A |
| 23 | BICF2G630379808         | 25990504 | G | 1 | 1      | A |
| 23 | BICF2G630379785         | 26003337 | A | 0 | 0      | C |
| 23 | BICF2P95782             | 26006705 | G | 1 | 0.3571 | A |
| 23 | BICF2G630379765         | 26033368 | A | 1 | 0.6429 | G |
| 23 | BICF2G630379754         | 26048716 | G | 1 | 0.6429 | A |
| 23 | BICF2G630379729         | 26060560 | A | 1 | 0.6429 | C |
| 23 | BICF2G630379707         | 26072267 | A | 1 | 0.6667 | G |
| 23 | BICF2G630379662         | 26103447 | G | 1 | 1      | A |
| 23 | BICF2G630379657         | 26105616 | G | 0 | 0      | A |
| 23 | BICF2G630379623         | 26125445 | A | 1 | 0.6429 | C |
| 23 | BICF2P432848            | 26133672 | C | 1 | 1      | A |
| 23 | BICF2G630379608         | 26140914 | G | 0 | 0      | C |
| 23 | BICF2G630379587         | 26158345 | A | 1 | 0.6429 | C |
| 23 | BICF2G630379579         | 26167478 | A | 1 | 0.6429 | G |
| 23 | BICF2G630379569         | 26178110 | T | 1 | 1      | A |
| 23 | BICF2G630379558         | 26189618 | A | 0 | 0.6429 | C |
| 23 | BICF2G630379546         | 26197961 | 0 | 0 | 0      | A |
| 23 | TIGRP2P303194_rs9045631 | 26217937 | A | 0 | 0      | G |
| 23 | BICF2P539769            | 26222453 | G | 0 | 0      | A |
| 23 | BICF2P194261            | 26243359 | A | 0 | 0      | C |
| 23 | TIGRP2P303208_rs8661315 | 26258575 | G | 1 | 1      | A |
| 23 | BICF2P119650            | 26273631 | 0 | 0 | 0      | A |
| 23 | BICF2P673981            | 26276164 | A | 1 | 0.7143 | G |
| 23 | BICF2P932801            | 26280298 | 0 | 0 | 0      | A |
| 23 | TIGRP2P303209_rs9075554 | 26289293 | A | 1 | 0.7143 | G |
| 23 | BICF2P739266            | 26301676 | G | 0 | 0      | A |
| 23 | BICF2P739267            | 26301867 | A | 0 | 0.3571 | G |
| 23 | BICF2G630379537         | 26318480 | 0 | 0 | 0      | G |
| 23 | BICF2P575015            | 26327351 | G | 0 | 0      | A |
| 23 | BICF2G630379523         | 26340748 | 0 | 0 | 0      | G |
| 23 | BICF2P492357            | 26350704 | A | 0 | 0      | G |
| 23 | BICF2S2301931           | 26358117 | G | 1 | 1      | A |
| 23 | BICF2P615475            | 26370162 | G | 0 | 0      | A |
| 23 | BICF2G630379509         | 26381062 | A | 1 | 1      | G |
| 23 | BICF2G630379499         | 26393024 | A | 1 | 1      | G |
| 23 | BICF2G630379474         | 26404634 | G | 0 | 0      | A |
| 23 | BICF2G630379442         | 26420772 | G | 1 | 0.3571 | A |
| 23 | BICF2G630379432         | 26436033 | A | 0 | 0      | G |
| 23 | BICF2G630379427         | 26441914 | A | 0 | 0.6429 | G |
| 23 | BICF2G630379406         | 26462758 | A | 1 | 0.3571 | C |
| 23 | BICF2G630379386         | 26475947 | G | 1 | 0.3571 | A |
| 23 | BICF2G630379357         | 26492544 | A | 0 | 0      | G |
| 23 | BICF2G630379353         | 26507715 | A | 0 | 0.6429 | T |
| 23 | BICF2G630379345         | 26520815 | A | 0 | 0.6429 | G |
| 23 | BICF2P856241            | 26543001 | A | 0 | 0.3571 | G |



|    |                         |          |   |   |        |   |
|----|-------------------------|----------|---|---|--------|---|
| 23 | BICF2P337583            | 26553673 | 0 | 0 | 0      | G |
| 23 | BICF2P1092663           | 26570760 | A | 0 | 0      | C |
| 23 | BICF2G630379295         | 26578336 | G | 0 | 0.6429 | A |
| 23 | BICF2P373011            | 26610499 | 0 | 0 | 0      | A |
| 23 | BICF2P1207524           | 26616811 | G | 1 | 1      | A |
| 23 | BICF2G630379262         | 26621735 | 0 | 0 | 0      | A |
| 23 | BICF2G630379260         | 26623658 | A | 0 | 0.6429 | G |
| 23 | BICF2G630379239         | 26651164 | A | 0 | 0      | G |
| 23 | BICF2G630379231         | 26659556 | A | 0 | 0      | G |
| 23 | TIGRP2P303306_rs9208402 | 26676341 | A | 0 | 0.2857 | G |
| 23 | BICF2P1222674           | 26680786 | A | 0 | 0      | G |
| 23 | BICF2G630379187         | 26694970 | A | 1 | 0.7143 | G |
| 23 | BICF2P551881            | 26706035 | G | 0 | 0.2857 | A |
| 23 | BICF2P511460            | 26723225 | 0 | 0 | 0      | G |
| 23 | BICF2P1410706           | 26727947 | A | 0 | 0      | G |
| 23 | BICF2P323458            | 26740024 | G | 0 | 0.3571 | A |
| 23 | BICF2G630379143         | 26752313 | A | 1 | 1      | T |
| 23 | BICF2G630379133         | 26771498 | A | 1 | 0.6429 | G |
| 23 | BICF2G630379132         | 26772057 | A | 1 | 1      | G |
| 23 | BICF2G630379118         | 26789785 | A | 0 | 0      | G |
| 23 | BICF2S23121295          | 26815999 | A | 0 | 0      | G |
| 23 | BICF2P1131737           | 26818665 | A | 0 | 0      | C |
| 23 | BICF2P1434957           | 26836782 | G | 0 | 0      | A |
| 23 | TIGRP2P303354_rs9153660 | 26844271 | G | 0 | 0.2857 | A |
| 23 | TIGRP2P303356_rs8801205 | 26856504 | A | 0 | 0      | G |
| 23 | TIGRP2P303357_rs9133788 | 26866942 | A | 0 | 0      | C |
| 23 | BICF2G630379074         | 26883327 | G | 0 | 0.6429 | A |
| 23 | BICF2G630379068         | 26887538 | G | 0 | 0.6429 | A |
| 23 | BICF2G630379039         | 26901471 | C | 0 | 0.6429 | A |
| 23 | BICF2G630378983         | 26911683 | A | 0 | 0.6667 | G |
| 23 | BICF2G630378958         | 26921643 | A | 0 | 0.6429 | G |
| 23 | BICF2G630378928         | 26943447 | A | 1 | 0.7143 | G |
| 23 | BICF2G630378923         | 26945540 | C | 1 | 1      | A |
| 23 | BICF2G630378911         | 26960718 | C | 0 | 0      | G |
| 23 | BICF2P1033428           | 26985640 | G | 0 | 0      | A |
| 23 | BICF2G630378905         | 26997900 | A | 0 | 0.6429 | G |
| 23 | BICF2G630378882         | 27012589 | A | 0 | 0      | G |
| 23 | BICF2G630378875         | 27015616 | C | 0 | 0      | A |
| 23 | BICF2G630378868         | 27028941 | G | 0 | 0.6429 | A |
| 23 | BICF2P659316            | 27044657 | A | 0 | 0.2857 | G |
| 23 | BICF2P643704            | 27049088 | A | 0 | 0      | G |
| 23 | TIGRP2P303379_rs8555055 | 27064666 | G | 1 | 0.7143 | A |
| 23 | BICF2P721935            | 27073235 | G | 1 | 0.7143 | A |
| 23 | BICF2P408085            | 27094425 | A | 1 | 0.3571 | G |
| 23 | BICF2P1129927           | 27115782 | A | 1 | 0.3571 | G |
| 23 | TIGRP2P303436_rs8976172 | 27126419 | G | 0 | 0      | A |
| 23 | TIGRP2P303447_rs8746427 | 27136252 | C | 0 | 0      | A |

|    |                         |          |   |   |        |   |
|----|-------------------------|----------|---|---|--------|---|
| 23 | BICF2P968565            | 27143182 | G | 0 | 0      | A |
| 23 | BICF2G630378840         | 27152472 | A | 0 | 0.3571 | G |
| 23 | BICF2G630378816         | 27167973 | A | 0 | 0      | G |
| 23 | BICF2P1031395           | 27179843 | A | 0 | 0      | G |
| 23 | BICF2G630378773         | 27189201 | A | 1 | 0.3571 | G |
| 23 | TIGRP2P303467_rs8873829 | 27203107 | G | 0 | 0      | A |
| 23 | BICF2G630378736         | 27209543 | G | 0 | 0      | A |
| 23 | BICF2S22917981          | 27225190 | A | 0 | 0      | G |
| 23 | BICF2S23529626          | 27234807 | G | 0 | 0.3571 | A |
| 23 | BICF2P372390            | 27246885 | 0 | 0 | 0      | A |
| 23 | BICF2S23339304          | 27288680 | G | 0 | 0      | A |
| 23 | BICF2P517639            | 27297724 | G | 1 | 0.3571 | A |
| 23 | BICF2P416995            | 27310326 | A | 1 | 0.3571 | C |
| 23 | BICF2P530844            | 27314402 | 0 | 0 | 0      | A |
| 23 | BICF2P933090            | 27328880 | G | 0 | 0.3571 | A |
| 23 | BICF2P251367            | 27336687 | G | 0 | 0.2857 | A |
| 23 | BICF2G630378674         | 27352177 | A | 0 | 0.3571 | G |
| 23 | BICF2G630378671         | 27352557 | A | 0 | 0.3571 | G |
| 23 | BICF2G630378670         | 27352636 | A | 0 | 0.3571 | G |
| 23 | BICF2P953908            | 27379146 | A | 0 | 0      | C |
| 23 | BICF2S2435664           | 27392729 | A | 1 | 1      | T |
| 23 | BICF2G630378649         | 27393943 | 0 | 0 | 0      | C |
| 23 | BICF2P1160565           | 27407446 | A | 0 | 0      | G |
| 23 | BICF2G630378648         | 27424496 | G | 1 | 0.3571 | A |
| 23 | BICF2G630378633         | 27430675 | A | 0 | 0.6429 | G |
| 23 | BICF2G630378625         | 27439608 | C | 0 | 0.6429 | A |
| 23 | BICF2S23514135          | 27454570 | G | 0 | 0      | A |
| 23 | BICF2G630378594         | 27463306 | A | 1 | 0.3571 | G |
| 23 | BICF2G630378572         | 27475580 | 0 | 0 | 0      | G |
| 23 | BICF2P241401            | 27490920 | G | 1 | 0.6429 | A |
| 23 | BICF2G630378536         | 27502497 | A | 0 | 0.6429 | G |
| 23 | BICF2P536340            | 27515783 | G | 0 | 0.6429 | A |
| 23 | BICF2P1044937           | 27521371 | A | 1 | 0.3571 | G |
| 23 | BICF2G630378523         | 27525631 | A | 1 | 1      | C |
| 23 | BICF2G630378520         | 27530109 | A | 1 | 1      | G |
| 23 | BICF2G630378516         | 27533294 | A | 0 | 0.6667 | G |
| 23 | BICF2G630378507         | 27542703 | C | 0 | 0.6429 | A |
| 23 | BICF2G630378505         | 27543574 | G | 0 | 0.6429 | A |
| 23 | BICF2P250888            | 27554686 | G | 1 | 0.3571 | A |
| 23 | BICF2G630378456         | 27568287 | A | 1 | 1      | G |
| 23 | BICF2G630378447         | 27582523 | A | 0 | 0.2857 | G |
| 23 | BICF2P262119            | 27589325 | A | 0 | 0      | C |
| 23 | BICF2G630378438         | 27609501 | T | 0 | 0      | A |
| 23 | BICF2G630378435         | 27612559 | A | 0 | 0      | G |
| 23 | BICF2S23637081          | 27626126 | 0 | 0 | 0      | A |
| 23 | BICF2G630378418         | 27652773 | 0 | 0 | 0      | G |
| 23 | BICF2S233919            | 27662449 | G | 0 | 0      | C |

|    |                         |          |   |   |        |   |
|----|-------------------------|----------|---|---|--------|---|
| 23 | BICF2P458380            | 27679000 | 0 | 0 | 0      | C |
| 23 | BICF2P1078618           | 27691453 | G | 1 | 0.6429 | A |
| 23 | BICF2P1078616           | 27692241 | G | 1 | 0.6429 | A |
| 23 | BICF2P695728            | 27712724 | G | 1 | 0.6429 | A |
| 23 | BICF2G630378417         | 27718759 | A | 1 | 0.6429 | C |
| 23 | BICF2P1034576           | 27735290 | 0 | 0 | 0      | G |
| 23 | BICF2S23411636          | 27746257 | 0 | 0 | 0      | T |
| 23 | BICF2P1277422           | 27760368 | G | 0 | 0.2857 | A |
| 23 | BICF2P1277421           | 27760618 | A | 0 | 0.2857 | G |
| 23 | BICF2G630378393         | 27767862 | C | 0 | 0      | A |
| 23 | BICF2G630378390         | 27773499 | A | 0 | 0      | G |
| 23 | BICF2P570324            | 27790460 | A | 0 | 0.2857 | G |
| 23 | TIGRP2P303535_rs9089343 | 27794306 | A | 0 | 0.2857 | C |
| 23 | BICF2P1094210           | 27803204 | G | 0 | 0.2857 | A |
| 23 | BICF2P1056235           | 27816345 | G | 0 | 0.2857 | A |
| 23 | BICF2P1266004           | 27825569 | A | 0 | 0.3571 | G |
| 23 | BICF2G630378378         | 27835845 | A | 1 | 0.6429 | C |
| 23 | BICF2G630378356         | 27845747 | A | 1 | 0.6667 | G |
| 23 | TIGRP2P303553_rs8888935 | 27864309 | A | 1 | 0.6429 | G |
| 23 | BICF2G630378318         | 27892936 | C | 1 | 0.3571 | A |
| 23 | BICF2G630378282         | 27906280 | T | 1 | 0.3571 | A |
| 23 | TIGRP2P303562_rs9054206 | 27921332 | G | 1 | 0.3571 | A |
| 23 | BICF2P308043            | 27927247 | A | 0 | 0      | G |
| 23 | TIGRP2P303568_rs8838548 | 27934261 | A | 1 | 0.3333 | G |
| 23 | BICF2G630378270         | 27953917 | A | 0 | 0.2857 | G |
| 23 | TIGRP2P303573_rs8769399 | 27963577 | A | 1 | 0.6429 | C |
| 23 | BICF2P922271            | 27985992 | C | 1 | 0.3571 | A |
| 23 | BICF2G630378268         | 27998298 | A | 0 | 0.2857 | T |
| 23 | BICF2S23133649          | 28005796 | C | 0 | 0      | A |
| 23 | BICF2P8039              | 28018946 | A | 0 | 0      | G |
| 23 | BICF2S23657331          | 28052637 | A | 0 | 0      | G |
| 23 | BICF2G630378253         | 28066589 | G | 1 | 0.3571 | A |
| 23 | BICF2G630378252         | 28076470 | G | 0 | 0.2857 | A |
| 23 | BICF2G630378248         | 28083650 | A | 1 | 0.7    | C |
| 23 | BICF2G630378247         | 28105131 | G | 0 | 0      | A |
| 23 | BICF2P480419            | 28110928 | A | 0 | 0      | G |
| 23 | BICF2P1053365           | 28119858 | A | 0 | 0      | G |
| 23 | BICF2S23210353          | 28132607 | 0 | 0 | 0      | A |
| 23 | BICF2P763565            | 28143702 | A | 0 | 0.2857 | G |
| 23 | BICF2G630378240         | 28159296 | A | 0 | 0      | G |
| 23 | BICF2S2304379           | 28170904 | A | 0 | 0      | G |
| 23 | TIGRP2P303591_rs8561594 | 28183382 | 0 | 0 | 0      | A |
| 23 | BICF2G630378211         | 28192844 | A | 0 | 0      | G |
| 23 | BICF2P1019827           | 28216165 | 0 | 0 | 0      | G |
| 23 | TIGRP2P303605_rs8910284 | 28226904 | 0 | 0 | 0      | G |
| 23 | BICF2G630378200         | 28232580 | G | 0 | 0      | A |
| 23 | BICF2P511670            | 28275680 | G | 0 | 0      | A |

|    |                         |          |   |   |        |   |
|----|-------------------------|----------|---|---|--------|---|
| 23 | BICF2P817632            | 28284898 | G | 0 | 0      | A |
| 23 | TIGRP2P303611_rs9029719 | 28295601 | G | 1 | 0.3571 | A |
| 23 | BICF2P675107            | 28319273 | 0 | 0 | 0      | A |
| 23 | TIGRP2P303615_rs8702903 | 28326175 | A | 0 | 0      | C |
| 23 | TIGRP2P303619_rs9002548 | 28342954 | G | 0 | 0      | A |
| 23 | BICF2P304806            | 28347623 | G | 0 | 0      | A |
| 23 | BICF2P1314647           | 28362284 | A | 0 | 0      | G |
| 23 | BICF2P841022            | 28382112 | C | 0 | 0      | A |
| 23 | BICF2P1250438           | 28394312 | C | 0 | 0      | A |
| 23 | BICF2P315602            | 28412790 | A | 0 | 0      | C |
| 23 | BICF2P964761            | 28417459 | T | 0 | 0      | A |
| 23 | BICF2P94596             | 28437290 | 0 | 0 | 0      | A |
| 23 | BICF2G630378193         | 28446088 | A | 0 | 0.3571 | G |
| 23 | BICF2G630378190         | 28465949 | A | 0 | 0.6429 | C |
| 23 | BICF2P333599            | 28482300 | A | 0 | 0      | G |
| 23 | BICF2P664506            | 28508418 | A | 0 | 0      | G |
| 23 | BICF2S23627226          | 28508918 | A | 0 | 0      | G |
| 23 | BICF2P1042109           | 28520988 | T | 0 | 0      | A |
| 23 | TIGRP2P303655_rs9120446 | 28539922 | A | 0 | 0      | G |
| 23 | BICF2P1074052           | 28546610 | G | 0 | 0      | A |
| 23 | BICF2P9017              | 28555432 | A | 0 | 0      | G |
| 23 | BICF2P1128015           | 28567297 | A | 0 | 0      | G |
| 23 | BICF2P521367            | 28582884 | 0 | 0 | 0      | G |
| 23 | BICF2S23623060          | 28591891 | G | 0 | 0      | A |
| 23 | BICF2P687015            | 28606654 | 0 | 0 | 0      | A |
| 23 | TIGRP2P303671_rs8887434 | 28623921 | 0 | 0 | 0      | G |
| 23 | BICF2S24510251          | 28639957 | G | 0 | 0      | A |
| 23 | BICF2P520188            | 28652800 | G | 0 | 0      | A |
| 23 | BICF2P109873            | 28666504 | 0 | 0 | 0      | A |
| 23 | BICF2P517849            | 28692125 | 0 | 0 | 0      | T |
| 23 | TIGRP2P303673_rs9137966 | 28702233 | 0 | 0 | 0      | G |
| 23 | BICF2G630378181         | 28735526 | A | 0 | 0      | G |
| 23 | BICF2G630378180         | 28739258 | G | 0 | 0      | A |
| 23 | BICF2S22947761          | 28756940 | G | 0 | 0      | A |
| 23 | BICF2G630378171         | 28763059 | A | 1 | 0.3571 | G |
| 23 | BICF2G630378140         | 28775232 | G | 1 | 0.6429 | A |
| 23 | BICF2G630378131         | 28792330 | A | 1 | 0.3571 | G |
| 23 | BICF2P1082474           | 28796328 | C | 0 | 0.25   | A |
| 23 | BICF2P140741            | 28809250 | 0 | 0 | 0      | G |
| 23 | TIGRP2P303682_rs8961677 | 28821741 | A | 1 | 0.6429 | C |
| 23 | TIGRP2P303692_rs8559828 | 28835866 | G | 0 | 0.2857 | A |
| 23 | BICF2P1455763           | 28849590 | A | 0 | 0.2857 | G |
| 23 | TIGRP2P303709_rs9019133 | 28862319 | A | 0 | 0.2857 | G |
| 23 | BICF2S22916871          | 28875317 | G | 0 | 0.6429 | A |
| 23 | BICF2S2321372           | 28881477 | A | 1 | 0.3571 | G |
| 23 | BICF2G630378107         | 28897781 | C | 0 | 0      | G |
| 23 | BICF2G630378094         | 28907338 | A | 0 | 0      | G |

|    |                         |          |   |   |        |   |
|----|-------------------------|----------|---|---|--------|---|
| 23 | BICF2G630378089         | 28913243 | G | 0 | 0      | A |
| 23 | BICF2G630378079         | 28926813 | A | 0 | 0      | G |
| 23 | BICF2G630378071         | 28936650 | A | 0 | 0      | G |
| 23 | BICF2P678304            | 28953714 | A | 0 | 0.2857 | C |
| 23 | BICF2G630378068         | 28953878 | C | 1 | 0.7143 | G |
| 23 | BICF2G630378058         | 28957601 | C | 1 | 0.7143 | G |
| 23 | BICF2G630378050         | 28970297 | A | 0 | 0      | T |
| 23 | BICF2S23757859          | 28986055 | G | 0 | 0.2857 | C |
| 23 | TIGRP2P303730_rs9132178 | 28992582 | A | 0 | 0      | C |
| 23 | TIGRP2P303733_rs8629063 | 29014923 | G | 0 | 0.3333 | A |
| 23 | BICF2G630378040         | 29027820 | G | 0 | 0      | A |
| 23 | BICF2G630378039         | 29048476 | A | 1 | 0.3571 | G |
| 23 | BICF2G630378038         | 29053899 | G | 0 | 0.3571 | C |
| 23 | BICF2G630378037         | 29062910 | A | 0 | 0.6429 | G |
| 23 | BICF2G630378033         | 29079377 | G | 0 | 0      | A |
| 23 | BICF2G630378022         | 29092813 | A | 0 | 0.6429 | G |
| 23 | BICF2G630378016         | 29100439 | A | 1 | 0.3571 | G |
| 23 | TIGRP2P303740_rs8845636 | 29119538 | G | 0 | 0.3571 | A |
| 23 | BICF2P1426224           | 29135332 | G | 0 | 0.3571 | A |
| 23 | BICF2P920486            | 29146081 | G | 0 | 0.3571 | A |
| 23 | BICF2P1068602           | 29165674 | 0 | 0 | 0      | G |
| 23 | BICF2P1160758           | 29192002 | T | 0 | 0.3571 | A |
| 23 | TIGRP2P303751_rs8873754 | 29200026 | G | 0 | 0.3571 | A |
| 23 | TIGRP2P303760_rs8532115 | 29213576 | C | 0 | 0.3571 | G |
| 23 | TIGRP2P303762_rs9039360 | 29221580 | C | 0 | 0.3571 | A |
| 23 | TIGRP2P303764_rs8754818 | 29244070 | G | 0 | 0.3571 | A |
| 23 | BICF2P490717            | 29244911 | A | 0 | 0.3571 | G |
| 23 | BICF2P193762            | 29267007 | G | 0 | 0      | A |
| 23 | BICF2P1033250           | 29279138 | A | 0 | 0      | T |
| 23 | BICF2G630378011         | 29291836 | T | 0 | 0      | A |
| 23 | BICF2P490920            | 29307974 | A | 0 | 0.3571 | G |
| 23 | TIGRP2P303792_rs8881472 | 29317468 | A | 0 | 0.3571 | G |
| 23 | BICF2G630378003         | 29332528 | G | 0 | 0.2857 | A |
| 23 | BICF2G630378002         | 29337936 | A | 0 | 0      | G |
| 23 | BICF2G630377995         | 29351327 | A | 0 | 0.2857 | G |
| 23 | TIGRP2P303810_rs9042084 | 29363946 | 0 | 0 | 0      | A |
| 23 | BICF2G630377983         | 29371876 | A | 0 | 0      | C |
| 23 | TIGRP2P303816_rs8489572 | 29388460 | G | 1 | 1      | C |
| 23 | BICF2G630377981         | 29397031 | A | 1 | 1      | G |
| 23 | BICF2G630377976         | 29397542 | A | 1 | 1      | G |
| 23 | BICF2S22954431          | 29405741 | A | 1 | 1      | T |
| 23 | BICF2G630377972         | 29420819 | A | 0 | 0      | G |
| 23 | BICF2P321081            | 29428857 | A | 1 | 1      | G |
| 23 | TIGRP2P303837_rs9175677 | 29441097 | A | 1 | 1      | G |
| 23 | BICF2G630377971         | 29461267 | A | 0 | 0      | G |
| 23 | TIGRP2P303844_rs9006464 | 29469527 | A | 1 | 0.7143 | G |
| 23 | TIGRP2P303846_rs8489456 | 29475946 | A | 0 | 0      | G |

|    |                         |          |   |   |        |   |
|----|-------------------------|----------|---|---|--------|---|
| 23 | BICF2S2412435           | 29484957 | G | 0 | 0      | A |
| 23 | BICF2S2412434           | 29485045 | G | 0 | 0      | C |
| 23 | BICF2G630377970         | 29486770 | C | 0 | 0.3    | A |
| 23 | BICF2G630377967         | 29519551 | G | 0 | 0      | A |
| 23 | BICF2S2365120           | 29520568 | G | 0 | 0.2857 | A |
| 23 | BICF2P172195            | 29555447 | 0 | 0 | 0      | G |
| 23 | BICF2S23120402          | 29572289 | C | 0 | 0.2857 | G |
| 23 | BICF2G630377966         | 29586646 | 0 | 0 | 0      | G |
| 23 | BICF2G630377964         | 29593121 | A | 0 | 0      | G |
| 23 | BICF2G630377954         | 29602918 | G | 0 | 0      | A |
| 23 | BICF2G630377930         | 29614263 | G | 0 | 0      | A |
| 23 | BICF2G630377927         | 29615201 | A | 0 | 0      | G |
| 23 | BICF2G630377915         | 29627051 | C | 0 | 0      | A |
| 23 | BICF2G630377908         | 29635577 | C | 0 | 0      | A |
| 23 | BICF2P1026542           | 29638405 | T | 1 | 0.3571 | A |
| 23 | BICF2P1364033           | 29654844 | A | 0 | 0.3571 | G |
| 23 | BICF2G630377889         | 29660489 | A | 1 | 1      | G |
| 23 | BICF2P475904            | 29671093 | A | 0 | 0.3571 | C |
| 23 | BICF2G630377864         | 29687441 | G | 0 | 0      | A |
| 23 | BICF2G630377839         | 29697484 | 0 | 0 | 0      | G |
| 23 | BICF2G630377814         | 29707097 | A | 0 | 0.3571 | G |
| 23 | BICF2P1427645           | 29722002 | A | 0 | 0.3571 | G |
| 23 | BICF2P1438595           | 29736248 | G | 0 | 0      | A |
| 23 | BICF2G630377786         | 29739284 | G | 0 | 0      | C |
| 23 | BICF2G630377777         | 29743009 | G | 0 | 0.3571 | A |
| 23 | BICF2G630377760         | 29753714 | G | 1 | 1      | A |
| 23 | BICF2G630377731         | 29767445 | 0 | 0 | 0      | G |
| 23 | BICF2G630377723         | 29776483 | G | 0 | 0.3571 | A |
| 23 | BICF2G630377711         | 29793045 | G | 0 | 0      | A |
| 23 | BICF2G630377705         | 29799136 | G | 0 | 0.6429 | A |
| 23 | BICF2G630377685         | 29808764 | G | 0 | 0.3571 | A |
| 23 | BICF2P1393409           | 29822671 | G | 0 | 0.6429 | A |
| 23 | BICF2P657103            | 29834892 | G | 0 | 0.6429 | A |
| 23 | BICF2P146811            | 29843027 | A | 0 | 0.3571 | G |
| 23 | BICF2S23646393          | 29857489 | A | 0 | 0.2857 | G |
| 23 | BICF2P1275661           | 29876358 | A | 0 | 0      | G |
| 23 | BICF2P1275662           | 29877605 | G | 0 | 0.3571 | A |
| 23 | BICF2S23718777          | 29918052 | G | 0 | 0.3571 | A |
| 23 | BICF2G630377664         | 29930912 | G | 1 | 0.3571 | A |
| 23 | TIGRP2P303890_rs9086689 | 29936190 | 0 | 0 | 0      | A |
| 23 | BICF2G630377662         | 29957602 | A | 1 | 0.3571 | G |
| 23 | BICF2P579998            | 30009610 | A | 0 | 0      | G |
| 23 | BICF2P493322            | 30025357 | A | 0 | 0.3571 | G |
| 23 | TIGRP2P303895_rs8776510 | 30033308 | 0 | 0 | 0      | G |
| 23 | BICF2G630377656         | 30042796 | A | 1 | 0.3571 | G |
| 23 | BICF2P103695            | 30053038 | 0 | 0 | 0      | A |
| 23 | BICF2G630377653         | 30068216 | A | 1 | 0.3571 | G |

|    |                         |          |   |   |        |   |
|----|-------------------------|----------|---|---|--------|---|
| 23 | BICF2P168108            | 30079555 | A | 1 | 0.6429 | C |
| 23 | BICF2G630377646         | 30084342 | A | 0 | 0.6429 | G |
| 23 | BICF2G630377642         | 30096850 | A | 0 | 0.2857 | G |
| 23 | BICF2G630377632         | 30114730 | A | 1 | 0.6429 | G |
| 23 | BICF2G630377621         | 30119481 | A | 1 | 0.6429 | C |
| 23 | BICF2G630377604         | 30131139 | 0 | 0 | 0      | G |
| 23 | BICF2G630377591         | 30148959 | G | 0 | 0      | A |
| 23 | BICF2G630377583         | 30161982 | A | 0 | 0.2857 | G |
| 23 | BICF2G630377574         | 30170259 | A | 0 | 0      | G |
| 23 | BICF2G630377564         | 30177663 | C | 0 | 0.3571 | A |
| 23 | BICF2G630377559         | 30187525 | C | 0 | 0.2857 | A |
| 23 | BICF2G630377555         | 30219550 | C | 0 | 0      | G |
| 23 | BICF2G630377551         | 30226328 | G | 1 | 1      | A |
| 23 | BICF2G630377546         | 30239075 | A | 0 | 0      | G |
| 23 | BICF2G630377542         | 30247553 | G | 0 | 0.3571 | C |
| 23 | BICF2G630377528         | 30260723 | G | 0 | 0.3571 | A |
| 23 | BICF2G630377526         | 30271306 | A | 0 | 0.3571 | G |
| 23 | BICF2G630377520         | 30291202 | G | 1 | 0.3571 | A |
| 23 | BICF2G630377507         | 30295363 | G | 0 | 0.3571 | A |
| 23 | BICF2P1325882           | 30309058 | A | 0 | 0.3571 | G |
| 23 | BICF2P1399666           | 30322484 | A | 0 | 0.3333 | C |
| 23 | BICF2P1369936           | 30331269 | A | 0 | 0.3571 | G |
| 23 | BICF2G630377486         | 30336299 | C | 0 | 0.6429 | A |
| 23 | BICF2G630377481         | 30337753 | A | 0 | 0.6667 | G |
| 23 | BICF2G630377470         | 30357595 | G | 0 | 0.6429 | C |
| 23 | BICF2G630377469         | 30365458 | A | 1 | 0.3571 | G |
| 23 | BICF2G630377445         | 30380743 | A | 0 | 0.6429 | G |
| 23 | BICF2G630377436         | 30384280 | C | 0 | 0.6429 | A |
| 23 | BICF2G630377423         | 30396411 | G | 0 | 0.6429 | A |
| 23 | BICF2G630377395         | 30420165 | G | 0 | 0.6429 | A |
| 23 | TIGRP2P303940_rs9056194 | 30456923 | A | 0 | 0.6429 | G |
| 23 | TIGRP2P303949_rs8849531 | 30470711 | G | 0 | 0.6429 | A |
| 23 | BICF2P583925            | 30479264 | C | 0 | 0.6429 | A |
| 23 | BICF2P144155            | 30489185 | G | 0 | 0.6429 | A |
| 23 | BICF2G630377373         | 30498003 | T | 0 | 0.6429 | A |
| 23 | BICF2G630377368         | 30513417 | G | 0 | 0.6429 | A |
| 23 | BICF2G630377359         | 30526255 | 0 | 0 | 0      | G |
| 23 | BICF2G630377351         | 30534130 | A | 0 | 0.6429 | G |
| 23 | BICF2G630377326         | 30555346 | 0 | 0 | 0      | A |
| 23 | TIGRP2P303963_rs9202130 | 30563801 | A | 0 | 0      | G |
| 23 | BICF2G630377309         | 30567557 | 0 | 0 | 0      | C |
| 23 | BICF2P917826            | 30580891 | A | 0 | 0.3571 | G |
| 23 | TIGRP2P303969_rs8767484 | 30592800 | G | 0 | 0.3571 | A |
| 23 | BICF2P446149            | 30611639 | G | 0 | 0      | A |
| 23 | BICF2P568312            | 30617443 | G | 0 | 0      | A |
| 23 | BICF2P274919            | 30626241 | G | 0 | 0      | A |
| 23 | BICF2S23511396          | 30642106 | A | 0 | 0      | G |

|    |                         |          |   |   |        |   |
|----|-------------------------|----------|---|---|--------|---|
| 23 | BICF2P719782            | 30654948 | A | 0 | 0      | G |
| 23 | BICF2G630377298         | 30691406 | G | 0 | 0      | A |
| 23 | TIGRP2P303986_rs8988773 | 30697843 | A | 0 | 0      | G |
| 23 | BICF2G630377255         | 30710790 | G | 0 | 0      | C |
| 23 | BICF2G630377250         | 30722769 | A | 0 | 0.6429 | G |
| 23 | BICF2S23238630          | 30734770 | A | 1 | 0.3571 | T |
| 23 | BICF2P516186            | 30742812 | A | 0 | 0.2857 | G |
| 23 | BICF2P707960            | 30761278 | C | 1 | 0.3571 | A |
| 23 | BICF2S2347267           | 30766252 | A | 0 | 0      | C |
| 23 | TIGRP2P303990_rs8491508 | 30778850 | A | 0 | 0.3571 | G |
| 23 | BICF2P314629            | 30790029 | A | 0 | 0.3571 | G |
| 23 | BICF2S23317270          | 30800470 | A | 0 | 0.3571 | G |
| 23 | TIGRP2P304025_rs9235070 | 30816521 | G | 0 | 0.3571 | A |
| 23 | BICF2P1501150           | 30822629 | A | 0 | 0.3571 | G |
| 23 | BICF2P275539            | 30840515 | G | 1 | 0.6429 | C |
| 23 | TIGRP2P304045_rs8586355 | 30864196 | A | 0 | 0.3571 | G |
| 23 | TIGRP2P304048_rs8507520 | 30871801 | A | 1 | 0.7143 | C |
| 23 | BICF2P656870            | 30879198 | A | 0 | 0.3571 | G |
| 23 | TIGRP2P304067_rs8872933 | 30897851 | A | 0 | 0.3571 | G |
| 23 | TIGRP2P304077_rs8704748 | 30910610 | A | 0 | 0      | C |
| 23 | BICF2G630377187         | 30920016 | A | 0 | 0      | G |
| 23 | BICF2G630377180         | 30923263 | A | 0 | 0      | G |
| 23 | BICF2G630377174         | 30930313 | G | 0 | 0      | A |
| 23 | BICF2P147054            | 30935247 | G | 1 | 0.7143 | A |
| 23 | BICF2S23658621          | 30937688 | T | 0 | 0      | A |
| 23 | BICF2G630377160         | 30946134 | C | 0 | 0.2857 | A |
| 23 | BICF2G630377159         | 30946967 | A | 1 | 0.7143 | G |
| 23 | BICF2G630377138         | 30959220 | A | 1 | 0.7143 | G |
| 23 | BICF2G630377118         | 30980316 | G | 1 | 0.7143 | A |
| 23 | BICF2G630377116         | 30982387 | A | 1 | 0.7143 | C |
| 23 | BICF2G630377094         | 30998448 | C | 0 | 0      | A |
| 23 | BICF2G630377077         | 31012363 | G | 0 | 0.2857 | A |
| 23 | BICF2P930275            | 31020609 | A | 0 | 0      | G |
| 23 | BICF2G630377034         | 31044343 | G | 1 | 0.7143 | A |
| 23 | BICF2G630377029         | 31050556 | G | 0 | 0      | A |
| 23 | BICF2G630376984         | 31070043 | A | 0 | 0      | G |
| 23 | BICF2G630376976         | 31074043 | A | 0 | 0      | G |
| 23 | BICF2G630376964         | 31084886 | C | 0 | 0      | A |
| 23 | BICF2S23535705          | 31097929 | 0 | 0 | 0      | A |
| 23 | BICF2P368677            | 31110099 | A | 0 | 0      | G |
| 23 | BICF2G630376915         | 31121751 | G | 0 | 0      | A |
| 23 | BICF2G630376899         | 31134728 | G | 0 | 0      | A |
| 23 | BICF2G630376887         | 31144445 | G | 0 | 0      | A |
| 23 | BICF2P1004770           | 31154303 | A | 0 | 0.3571 | G |
| 23 | BICF2G630376877         | 31166130 | A | 0 | 0      | G |
| 23 | BICF2P169326            | 31188280 | C | 0 | 0.3333 | A |
| 23 | BICF2G630376844         | 31206950 | G | 0 | 0.3571 | A |



|    |                         |          |   |   |        |   |
|----|-------------------------|----------|---|---|--------|---|
| 23 | BICF2S23420290          | 31218919 | C | 0 | 0      | A |
| 23 | BICF2G630376828         | 31226770 | A | 0 | 0      | G |
| 23 | BICF2G630376820         | 31236318 | G | 0 | 0      | A |
| 23 | BICF2G630376814         | 31252239 | C | 0 | 0      | A |
| 23 | BICF2G630376808         | 31261526 | A | 0 | 0      | G |
| 23 | BICF2G630376803         | 31270847 | G | 0 | 0      | A |
| 23 | BICF2G630376780         | 31298673 | A | 1 | 0.3571 | G |
| 23 | BICF2P806548            | 31306390 | A | 1 | 0.3    | G |
| 23 | BICF2S23053655          | 31318128 | G | 0 | 0      | A |
| 23 | BICF2G630376757         | 31335120 | A | 1 | 0.3333 | G |
| 23 | BICF2G630376749         | 31342529 | G | 1 | 0.3571 | A |
| 23 | BICF2G630376745         | 31350512 | C | 1 | 0.3571 | A |
| 23 | BICF2G630376743         | 31373381 | 0 | 0 | 0      | C |
| 23 | BICF2P364630            | 31406335 | A | 0 | 0.3571 | C |
| 23 | BICF2S23431584          | 31409868 | A | 0 | 0      | G |
| 23 | BICF2P919525            | 31426604 | A | 0 | 0.3571 | G |
| 23 | BICF2S23740698          | 31429930 | G | 0 | 0      | A |
| 23 | BICF2G630376740         | 31462869 | A | 1 | 0.3571 | G |
| 23 | BICF2G630376739         | 31471721 | A | 0 | 0.3571 | C |
| 23 | BICF2G630376738         | 31478155 | G | 0 | 0.3571 | A |
| 23 | BICF2P384052            | 31495117 | G | 1 | 0.6429 | A |
| 23 | BICF2G630376725         | 31498770 | A | 0 | 0      | C |
| 23 | BICF2G630376682         | 31517666 | A | 1 | 0.7143 | G |
| 23 | BICF2G630376661         | 31523495 | G | 1 | 0.3571 | A |
| 23 | BICF2G630376658         | 31524773 | A | 1 | 0.3571 | C |
| 23 | BICF2P1036781           | 31544290 | G | 0 | 0.3571 | A |
| 23 | BICF2G630376618         | 31545082 | G | 0 | 0.3571 | A |
| 23 | BICF2G630376607         | 31564011 | G | 1 | 0.7143 | A |
| 23 | BICF2G630376583         | 31574653 | G | 1 | 0.3571 | A |
| 23 | BICF2G630376562         | 31580153 | A | 1 | 0.3571 | C |
| 23 | BICF2G630376528         | 31592090 | G | 1 | 0.3571 | A |
| 23 | BICF2G630376491         | 31602782 | G | 1 | 0.3571 | A |
| 23 | BICF2S22920110          | 31619581 | C | 0 | 0      | A |
| 23 | BICF2G630376426         | 31627966 | A | 1 | 0.7143 | G |
| 23 | BICF2G630376409         | 31638939 | A | 1 | 0.7143 | G |
| 23 | BICF2G630376397         | 31650332 | C | 0 | 0      | A |
| 23 | BICF2S23610830          | 31664162 | A | 0 | 0.3571 | G |
| 23 | TIGRP2P304133_rs9128773 | 31678639 | A | 0 | 0.3571 | G |
| 23 | BICF2S22960904          | 31689317 | A | 0 | 0      | G |
| 23 | BICF2G630376374         | 31698033 | A | 0 | 0.3571 | G |
| 23 | TIGRP2P304137_rs8837946 | 31702554 | G | 1 | 0.7143 | A |
| 23 | BICF2P910167            | 31702999 | G | 1 | 0.3571 | A |
| 23 | BICF2G630376367         | 31709397 | G | 1 | 0.3571 | C |
| 23 | BICF2G630376345         | 31719762 | A | 1 | 0.3571 | C |
| 23 | BICF2G630376331         | 31736366 | G | 1 | 0.3571 | A |
| 23 | BICF2P1141363           | 31740565 | A | 1 | 0.3571 | C |
| 23 | BICF2G630376314         | 31751605 | G | 1 | 0.3571 | C |

|    |                         |          |   |   |        |   |
|----|-------------------------|----------|---|---|--------|---|
| 23 | BICF2P425040            | 31765926 | A | 1 | 0.7143 | G |
| 23 | BICF2P987656            | 31785498 | G | 0 | 0.2857 | A |
| 23 | BICF2G630376238         | 31787457 | A | 0 | 0      | G |
| 23 | BICF2G630376198         | 31804469 | C | 0 | 0.3571 | A |
| 23 | BICF2P207269            | 31816503 | G | 1 | 0.7143 | A |
| 23 | BICF2G630376176         | 31824888 | G | 1 | 0.3571 | A |
| 23 | BICF2P818316            | 31834344 | G | 1 | 0.3571 | A |
| 23 | BICF2G630376123         | 31854128 | G | 0 | 0      | A |
| 23 | BICF2P1389886           | 31854541 | A | 1 | 0.3571 | G |
| 23 | BICF2G630376122         | 31856236 | A | 0 | 0      | G |
| 23 | BICF2G630376107         | 31867485 | A | 0 | 0      | G |
| 23 | BICF2G630376094         | 31878445 | G | 0 | 0      | A |
| 23 | BICF2G630376061         | 31896235 | A | 1 | 0.6429 | G |
| 23 | BICF2P1253854           | 31901965 | G | 1 | 0.6429 | A |
| 23 | BICF2S23315414          | 31917199 | G | 0 | 0      | A |
| 23 | BICF2G630376038         | 31926555 | G | 1 | 0.3571 | A |
| 23 | BICF2G630376035         | 31929592 | G | 1 | 0.3571 | A |
| 23 | BICF2G630376005         | 31943714 | G | 0 | 0      | A |
| 23 | BICF2P681877            | 31950965 | 0 | 0 | 0      | A |
| 23 | BICF2G630375997         | 31968603 | A | 0 | 0      | T |
| 23 | BICF2P1363210           | 31988968 | G | 0 | 0.2857 | A |
| 23 | TIGRP2P304198_rs9061580 | 31996191 | A | 0 | 0.2857 | G |
| 23 | TIGRP2P304205_rs8788268 | 32012628 | C | 0 | 0.3571 | A |
| 23 | BICF2P262255            | 32020948 | C | 0 | 0.3571 | A |
| 23 | BICF2P1414412           | 32029753 | A | 0 | 0.3571 | C |
| 23 | BICF2G630375950         | 32042392 | A | 0 | 0      | C |
| 23 | BICF2G630375946         | 32068109 | G | 0 | 0      | A |
| 23 | BICF2S23446375          | 32083921 | A | 0 | 0      | T |
| 23 | BICF2P582291            | 32086188 | 0 | 0 | 0      | A |
| 23 | BICF2S23212908          | 32097081 | A | 0 | 0.3571 | G |
| 23 | BICF2G630375943         | 32119344 | A | 0 | 0.2857 | C |
| 23 | BICF2G630375938         | 32121825 | G | 1 | 0.3571 | A |
| 23 | BICF2G630375921         | 32150569 | A | 0 | 0.2857 | G |
| 23 | BICF2G630375897         | 32156321 | A | 0 | 0      | G |
| 23 | BICF2P362738            | 32166855 | A | 1 | 0.3571 | G |
| 23 | BICF2G630375860         | 32187971 | G | 0 | 0.2857 | A |
| 23 | BICF2G630375855         | 32192776 | G | 0 | 0.3571 | C |
| 23 | BICF2G630375841         | 32200814 | A | 0 | 0.2857 | T |
| 23 | BICF2G630375807         | 32217018 | G | 1 | 0.3571 | A |
| 23 | BICF2G630375805         | 32219846 | A | 1 | 0.7143 | G |
| 23 | BICF2S23526893          | 32228162 | C | 0 | 0      | A |
| 23 | BICF2P728383            | 32235661 | A | 1 | 0.6429 | G |
| 23 | TIGRP2P304248_rs8791529 | 32253572 | A | 1 | 0.3571 | G |
| 23 | BICF2G630375752         | 32271706 | A | 0 | 0.2857 | T |
| 23 | BICF2G630375720         | 32289392 | C | 0 | 0.2857 | G |
| 23 | BICF2P765380            | 32303157 | G | 1 | 0.7143 | A |
| 23 | BICF2P1123253           | 32308091 | A | 1 | 0.7143 | G |

|    |                         |          |   |   |        |   |
|----|-------------------------|----------|---|---|--------|---|
| 23 | BICF2S23542923          | 32318540 | C | 1 | 0.7143 | A |
| 23 | BICF2G630375709         | 32348762 | A | 0 | 0      | G |
| 23 | BICF2G630375706         | 32353028 | A | 0 | 0      | G |
| 23 | BICF2G630375662         | 32371025 | A | 0 | 0      | T |
| 23 | BICF2G630375632         | 32383003 | C | 0 | 0.2857 | A |
| 23 | BICF2S2302628           | 32398101 | A | 0 | 0      | G |
| 23 | BICF2S23734037          | 32434171 | G | 0 | 0      | A |
| 23 | BICF2G630375607         | 32447143 | C | 0 | 0      | A |
| 23 | BICF2G630375602         | 32459859 | A | 1 | 1      | C |
| 23 | BICF2G630375598         | 32467466 | T | 1 | 0.7143 | A |
| 23 | BICF2G630375592         | 32493204 | A | 1 | 0.7143 | G |
| 23 | BICF2G630375590         | 32500396 | A | 0 | 0      | C |
| 23 | BICF2G630375582         | 32512174 | G | 0 | 0      | A |
| 23 | BICF2G630375568         | 32530184 | A | 0 | 0      | G |
| 23 | BICF2P406301            | 32538159 | 0 | 0 | 0      | A |
| 23 | BICF2G630375565         | 32551058 | C | 1 | 0.7143 | A |
| 23 | BICF2G630375551         | 32566480 | G | 1 | 1      | A |
| 23 | BICF2G630375543         | 32568574 | A | 1 | 1      | C |
| 23 | BICF2G630375505         | 32583495 | G | 1 | 1      | A |
| 23 | BICF2G630375496         | 32591773 | A | 1 | 1      | G |
| 23 | BICF2G630375486         | 32603962 | A | 1 | 1      | G |
| 23 | BICF2G630375471         | 32623383 | C | 1 | 0.7143 | A |
| 23 | BICF2G630375457         | 32636810 | A | 0 | 0      | T |
| 23 | BICF2G630375455         | 32644362 | G | 1 | 0.7143 | A |
| 23 | BICF2G630375454         | 32649474 | C | 1 | 0.7143 | A |
| 23 | BICF2G630375434         | 32665947 | A | 0 | 0      | C |
| 23 | BICF2G630375429         | 32681694 | A | 0 | 0      | C |
| 23 | BICF2S23539245          | 32684749 | A | 0 | 0.2857 | G |
| 23 | BICF2G630375421         | 32695793 | G | 0 | 0.2857 | A |
| 23 | BICF2P151771            | 32711196 | 0 | 0 | 0      | A |
| 23 | G1227f55S172            | 32735674 | 0 | 0 | 0      | A |
| 23 | BICF2P240762            | 32762849 | 0 | 0 | 0      | A |
| 23 | BICF2G630375420         | 32793933 | A | 1 | 0.3    | G |
| 23 | G1228f28S202            | 32823819 | 0 | 0 | 0      | C |
| 23 | BICF2P571297            | 32854122 | 0 | 0 | 0      | A |
| 23 | BICF2P1228710           | 32867835 | 0 | 0 | 0      | G |
| 23 | BICF2P473926            | 32882334 | 0 | 0 | 0      | C |
| 23 | BICF2P245110            | 32900597 | 0 | 0 | 0      | A |
| 23 | TIGRP2P304307_rs8562534 | 32962735 | A | 0 | 0      | G |
| 23 | BICF2P694890            | 32978573 | A | 0 | 0      | G |
| 23 | TIGRP2P304316_rs9142896 | 32982106 | A | 0 | 0      | C |
| 23 | BICF2P1454244           | 32994188 | C | 0 | 0      | A |
| 23 | BICF2P683271            | 33011886 | C | 0 | 0.3571 | A |
| 23 | BICF2S23447525          | 33023015 | A | 0 | 0.3571 | G |
| 23 | TIGRP2P304341_rs8624778 | 33035330 | G | 0 | 0.3571 | A |
| 23 | BICF2G630375407         | 33039523 | A | 0 | 0      | G |
| 23 | BICF2G630375397         | 33061300 | G | 0 | 0      | A |

|    |                         |          |   |   |        |   |
|----|-------------------------|----------|---|---|--------|---|
| 23 | BICF2P239887            | 33080816 | 0 | 0 | 0      | T |
| 23 | BICF2G630375384         | 33089199 | C | 0 | 0      | A |
| 23 | BICF2G630375378         | 33104149 | T | 0 | 0      | A |
| 23 | BICF2G630375375         | 33112273 | A | 0 | 0      | G |
| 23 | BICF2G630375373         | 33120717 | G | 0 | 0      | A |
| 23 | BICF2G630375366         | 33133454 | A | 0 | 0      | G |
| 23 | BICF2G630375364         | 33147765 | A | 0 | 0      | G |
| 23 | BICF2G630375355         | 33168337 | A | 1 | 0.3571 | T |
| 23 | BICF2G630375350         | 33181472 | A | 0 | 0      | G |
| 23 | BICF2G630375346         | 33189267 | G | 0 | 0      | A |
| 23 | TIGRP2P304343_rs8511674 | 33208749 | G | 1 | 0.3571 | A |
| 23 | BICF2G630375334         | 33213875 | A | 0 | 0      | G |
| 23 | BICF2G630375331         | 33225531 | G | 1 | 0.3571 | A |
| 23 | TIGRP2P304344_rs8734704 | 33254916 | 0 | 0 | 0      | C |
| 23 | BICF2G630375317         | 33262295 | A | 0 | 0      | G |
| 23 | BICF2G630375312         | 33273131 | A | 0 | 0      | G |
| 23 | BICF2G630375304         | 33283335 | C | 0 | 0      | A |
| 23 | BICF2G630375299         | 33302408 | A | 1 | 0.3571 | G |
| 23 | BICF2P1204454           | 33307740 | 0 | 0 | 0      | G |
| 23 | BICF2G630375293         | 33319387 | 0 | 0 | 0      | G |
| 23 | BICF2G630375292         | 33329108 | 0 | 0 | 0      | G |
| 23 | BICF2G630375288         | 33339995 | C | 0 | 0      | A |
| 23 | BICF2G630375278         | 33360016 | A | 0 | 0      | G |
| 23 | BICF2P480511            | 33367713 | C | 0 | 0      | A |
| 23 | BICF2G630375268         | 33376383 | G | 0 | 0.6429 | A |
| 23 | BICF2P1115914           | 33388069 | G | 0 | 0      | A |
| 23 | BICF2P403098            | 33401748 | G | 0 | 0      | A |
| 23 | TIGRP2P304372_rs9205159 | 33413056 | A | 1 | 1      | G |
| 23 | BICF2G630375261         | 33428358 | A | 0 | 0      | G |
| 23 | BICF2P1333073           | 33437184 | A | 0 | 0      | T |
| 23 | BICF2G630375241         | 33442953 | A | 0 | 0.6429 | G |
| 23 | BICF2G630375239         | 33443650 | A | 0 | 0.6429 | G |
| 23 | BICF2G630375234         | 33446251 | A | 0 | 0.2857 | G |
| 23 | BICF2P869194            | 33452473 | G | 0 | 0      | A |
| 23 | TIGRP2P304384_rs9051496 | 33454706 | A | 1 | 0.6429 | G |
| 23 | TIGRP2P304400_rs9048140 | 33474549 | G | 0 | 0      | A |
| 23 | BICF2G630375212         | 33480899 | G | 0 | 0      | A |
| 23 | BICF2G630375201         | 33488197 | G | 0 | 0      | A |
| 23 | BICF2S23020090          | 33502056 | A | 0 | 0.2857 | G |
| 23 | BICF2G630375168         | 33512172 | G | 0 | 0.25   | A |
| 23 | BICF2G630375151         | 33522811 | C | 0 | 0      | G |
| 23 | BICF2P1414801           | 33535513 | 0 | 0 | 0      | G |
| 23 | BICF2P45450             | 33550227 | A | 0 | 0      | G |
| 23 | BICF2G630375090         | 33570062 | G | 0 | 0      | A |
| 23 | BICF2G630375079         | 33580499 | G | 0 | 0      | A |
| 23 | BICF2P1203558           | 33596028 | A | 0 | 0      | C |
| 23 | TIGRP2P304414_rs8671944 | 33603387 | A | 0 | 0      | G |

|    |                         |          |   |   |        |   |
|----|-------------------------|----------|---|---|--------|---|
| 23 | BICF2P440015            | 33621995 | G | 0 | 0      | A |
| 23 | TIGRP2P304423_rs8620403 | 33628514 | 0 | 0 | 0      | G |
| 23 | BICF2P1460149           | 33638600 | A | 1 | 0.3571 | G |
| 23 | BICF2P955301            | 33650090 | G | 1 | 0.6429 | A |
| 23 | BICF2P1427229           | 33667327 | A | 1 | 1      | G |
| 23 | BICF2P740967            | 33672798 | A | 1 | 1      | G |
| 23 | BICF2P3318              | 33686372 | 0 | 0 | 0      | A |
| 23 | BICF2G630375041         | 33695275 | A | 0 | 0      | C |
| 23 | TIGRP2P304429_rs8844634 | 33717669 | 0 | 0 | 0      | G |
| 23 | BICF2S2449058           | 33718062 | G | 0 | 0      | A |
| 23 | BICF2P944712            | 33735788 | 0 | 0 | 0      | G |
| 23 | BICF2G630375008         | 33742722 | C | 0 | 0.3333 | A |
| 23 | BICF2G630374975         | 33752608 | A | 0 | 0.3571 | C |
| 23 | BICF2G630374947         | 33764391 | A | 0 | 0.3571 | G |
| 23 | BICF2G630374942         | 33764558 | A | 0 | 0.3571 | G |
| 23 | BICF2G630374900         | 33780993 | G | 0 | 0      | A |
| 23 | TIGRP2P304444_rs8756604 | 33792992 | C | 0 | 0      | G |
| 23 | BICF2P22838             | 33800953 | A | 0 | 0      | G |
| 23 | BICF2P277486            | 33819591 | C | 0 | 0      | A |
| 23 | BICF2S23032181          | 33823191 | G | 0 | 0      | A |
| 23 | BICF2G630374893         | 33837857 | A | 1 | 0.3571 | G |
| 23 | BICF2G630374879         | 33845849 | G | 0 | 0      | A |
| 23 | BICF2P926596            | 33863823 | G | 0 | 0      | A |
| 23 | BICF2P926594            | 33863938 | G | 0 | 0      | A |
| 23 | BICF2S23248165          | 33874543 | 0 | 0 | 0      | G |
| 23 | BICF2S2372197           | 33888462 | A | 0 | 0      | G |
| 23 | BICF2G630374856         | 33898188 | A | 0 | 0      | G |
| 23 | BICF2G630374848         | 33902648 | A | 0 | 0      | G |
| 23 | TIGRP2P304490_rs8723968 | 33919743 | G | 1 | 1      | A |
| 23 | BICF2G630374824         | 33932360 | G | 1 | 0.3571 | A |
| 23 | BICF2P1270370           | 33943387 | A | 0 | 0      | G |
| 23 | BICF2P375377            | 33965600 | A | 0 | 0.2857 | G |
| 23 | G1229f34S38             | 33990035 | 0 | 0 | 0      | A |
| 23 | BICF2G630374816         | 34012522 | 0 | 0 | 0      | C |
| 23 | BICF2P341518            | 34020504 | 0 | 0 | 0      | A |
| 23 | BICF2P1434440           | 34045728 | 0 | 0 | 0      | A |
| 23 | BICF2G630374813         | 34067309 | 0 | 0 | 0      | G |
| 23 | BICF2P400543            | 34075422 | G | 0 | 0.6429 | A |
| 23 | BICF2P449101            | 34086614 | G | 0 | 0.6429 | A |
| 23 | BICF2P1080084           | 34103256 | G | 0 | 0.6429 | A |
| 23 | TIGRP2P304501_rs8980867 | 34113311 | A | 1 | 1      | C |
| 23 | BICF2G630374806         | 34127054 | G | 1 | 1      | A |
| 23 | TIGRP2P304512_rs8914536 | 34137472 | A | 1 | 1      | C |
| 23 | BICF2G630374782         | 34155018 | A | 1 | 1      | G |
| 23 | BICF2G630374762         | 34167926 | A | 0 | 0.6429 | C |
| 23 | BICF2G630374761         | 34168764 | G | 0 | 0.6429 | A |
| 23 | BICF2G630374754         | 34183383 | G | 0 | 0.6429 | A |

|    |                         |          |   |   |        |   |
|----|-------------------------|----------|---|---|--------|---|
| 23 | BICF2G630374736         | 34197333 | A | 0 | 0      | G |
| 23 | BICF2G630374731         | 34202178 | A | 0 | 0.6429 | G |
| 23 | BICF2P346251            | 34214335 | G | 0 | 0      | A |
| 23 | BICF2G630374724         | 34229002 | A | 0 | 0      | G |
| 23 | BICF2G630374701         | 34241941 | G | 1 | 0.3571 | A |
| 23 | BICF2G630374682         | 34259163 | A | 1 | 1      | C |
| 23 | BICF2P775526            | 34270821 | G | 1 | 1      | A |
| 23 | BICF2P563756            | 34290533 | G | 0 | 0.3571 | A |
| 23 | BICF2P1040931           | 34299591 | A | 0 | 0.2857 | G |
| 23 | BICF2G630374665         | 34314848 | A | 0 | 0      | G |
| 23 | BICF2G630374659         | 34345882 | G | 1 | 0.3571 | A |
| 23 | BICF2P18696             | 34353223 | 0 | 0 | 0      | A |
| 23 | BICF2G630374642         | 34370715 | A | 0 | 0.6429 | G |
| 23 | BICF2G630374636         | 34374305 | A | 0 | 0.3571 | G |
| 23 | BICF2G630374628         | 34386298 | A | 1 | 0.6429 | C |
| 23 | BICF2G630374617         | 34400663 | A | 0 | 0      | G |
| 23 | BICF2P175200            | 34405190 | A | 0 | 0      | G |
| 23 | BICF2P171957            | 34413057 | C | 0 | 0      | A |
| 23 | TIGRP2P304539_rs8630734 | 34430768 | G | 0 | 0      | A |
| 23 | BICF2G630374578         | 34447404 | 0 | 0 | 0      | G |
| 23 | BICF2G630374574         | 34455726 | A | 0 | 0.2857 | G |
| 23 | BICF2P366112            | 34472550 | 0 | 0 | 0      | C |
| 23 | BICF2G630374555         | 34478812 | A | 0 | 0.6429 | G |
| 23 | BICF2P719382            | 34499366 | G | 0 | 0.2857 | A |
| 23 | TIGRP2P304543_rs8936793 | 34500797 | A | 1 | 0.3571 | G |
| 23 | BICF2S233609            | 34511852 | A | 0 | 0.2857 | G |
| 23 | BICF2S23448679          | 34523018 | A | 0 | 0      | G |
| 23 | BICF2G630374510         | 34544817 | G | 0 | 0      | A |
| 23 | BICF2P712742            | 34546949 | A | 0 | 0      | G |
| 23 | BICF2S23515068          | 34561166 | A | 1 | 0.3571 | G |
| 23 | BICF2G630374460         | 34569652 | A | 0 | 0      | G |
| 23 | BICF2G630374437         | 34581412 | A | 0 | 0      | G |
| 23 | BICF2G630374429         | 34593519 | G | 1 | 0.3571 | A |
| 23 | BICF2G630374413         | 34605300 | A | 0 | 0      | G |
| 23 | BICF2G630374406         | 34624020 | A | 0 | 0.6429 | G |
| 23 | BICF2G630374393         | 34628000 | A | 0 | 0.6667 | G |
| 23 | BICF2G630374376         | 34642049 | G | 0 | 0.6429 | A |
| 23 | BICF2S23333027          | 34656406 | A | 0 | 0.6429 | G |
| 23 | BICF2G630374351         | 34665263 | A | 0 | 0.6429 | G |
| 23 | BICF2G630374326         | 34675932 | A | 0 | 0      | G |
| 23 | BICF2G630374320         | 34684816 | G | 0 | 0      | A |
| 23 | BICF2G630374282         | 34694093 | G | 0 | 0      | A |
| 23 | BICF2G630374278         | 34696697 | G | 0 | 0      | A |
| 23 | BICF2S23331180          | 34716108 | C | 1 | 1      | A |
| 23 | TIGRP2P304600_rs9228322 | 34727220 | C | 0 | 0      | A |
| 23 | TIGRP2P304610_rs9228307 | 34730081 | C | 0 | 0      | A |
| 23 | BICF2G630374203         | 34752850 | A | 1 | 0.75   | T |

|    |                         |          |   |   |        |   |
|----|-------------------------|----------|---|---|--------|---|
| 23 | BICF2G630374202         | 34753995 | G | 0 | 0      | A |
| 23 | BICF2G630374158         | 34768105 | A | 0 | 0      | G |
| 23 | BICF2G630374128         | 34781550 | G | 0 | 0.2857 | A |
| 23 | TIGRP2P304613_rs8932730 | 34794987 | A | 0 | 0.2857 | G |
| 23 | BICF2G630374119         | 34804572 | A | 0 | 0.3571 | G |
| 23 | BICF2G630374113         | 34817848 | A | 1 | 1      | G |
| 23 | BICF2G630374109         | 34827224 | A | 0 | 0.2857 | C |
| 23 | BICF2S23123620          | 34833804 | G | 1 | 0.7143 | A |
| 23 | BICF2S23616591          | 34836621 | A | 0 | 0.2857 | G |
| 23 | BICF2G630374086         | 34848422 | G | 0 | 0      | A |
| 23 | BICF2G630374053         | 34861716 | A | 0 | 0      | G |
| 23 | BICF2G630374032         | 34869484 | C | 0 | 0.2857 | A |
| 23 | BICF2G630373993         | 34885150 | A | 0 | 0.3571 | C |
| 23 | BICF2G630373974         | 34898506 | C | 0 | 0.2857 | G |
| 23 | BICF2G630373967         | 34904278 | A | 0 | 0      | C |
| 23 | BICF2S2318521           | 34919732 | A | 1 | 0.6429 | G |
| 23 | BICF2P1195125           | 34934411 | 0 | 0 | 0      | C |
| 23 | BICF2G630373870         | 34945252 | A | 1 | 0.6429 | G |
| 23 | BICF2G630373865         | 34951413 | C | 0 | 0      | A |
| 23 | BICF2S23526507          | 34968108 | A | 0 | 0      | G |
| 23 | BICF2S23615484          | 34974993 | 0 | 0 | 0      | G |
| 23 | BICF2G630373836         | 34984201 | A | 0 | 0      | C |
| 23 | BICF2G630373834         | 34986049 | A | 0 | 0      | C |
| 23 | BICF2G630373797         | 34999197 | T | 0 | 0      | A |
| 23 | BICF2G630373764         | 35009886 | G | 0 | 0      | A |
| 23 | BICF2G630373763         | 35011534 | 0 | 0 | 0      | G |
| 23 | TIGRP2P304653_rs9187373 | 35017752 | A | 0 | 0.3571 | G |
| 23 | BICF2P1053663           | 35035888 | A | 1 | 0.6429 | G |
| 23 | BICF2G630373728         | 35041979 | G | 0 | 0.3571 | A |
| 23 | BICF2G630373727         | 35047809 | G | 0 | 0      | A |
| 23 | BICF2G630373708         | 35053175 | A | 0 | 0      | G |
| 23 | BICF2G630373685         | 35072050 | A | 1 | 1      | G |
| 23 | BICF2G630373681         | 35083155 | 0 | 0 | 0      | C |
| 23 | BICF2P467288            | 35093250 | G | 0 | 0      | A |
| 23 | TIGRP2P304654_rs8788411 | 35107039 | 0 | 0 | 0      | A |
| 23 | BICF2P1028177           | 35116692 | A | 0 | 0      | G |
| 23 | BICF2G630373634         | 35121944 | 0 | 0 | 0      | G |
| 23 | BICF2P472654            | 35135710 | A | 0 | 0      | G |
| 23 | BICF2G630373554         | 35144332 | 0 | 0 | 0      | G |
| 23 | BICF2S23525766          | 35144755 | A | 0 | 0      | G |
| 23 | BICF2S23648329          | 35157171 | A | 0 | 0      | G |
| 23 | BICF2G630373531         | 35168010 | 0 | 0 | 0      | G |
| 23 | BICF2G630373509         | 35187466 | G | 0 | 0.3571 | A |
| 23 | BICF2G630373487         | 35195574 | A | 0 | 0.3571 | C |
| 23 | BICF2P557745            | 35206099 | A | 0 | 0      | G |
| 23 | BICF2G630373467         | 35214163 | A | 0 | 0      | G |
| 23 | BICF2G630373443         | 35234277 | A | 0 | 0.3571 | G |

|    |                         |          |   |   |        |   |
|----|-------------------------|----------|---|---|--------|---|
| 23 | BICF2G630373427         | 35242620 | G | 0 | 0      | A |
| 23 | BICF2G630373412         | 35250240 | G | 0 | 0      | A |
| 23 | BICF2G630373396         | 35262851 | G | 0 | 0      | A |
| 23 | BICF2S2333038           | 35279731 | A | 0 | 0.2857 | G |
| 23 | BICF2S2332898           | 35282527 | G | 0 | 0.2857 | C |
| 23 | BICF2G630373387         | 35308851 | A | 0 | 0.3571 | G |
| 23 | BICF2S24117364          | 35343894 | 0 | 0 | 0      | G |
| 23 | BICF2G630373386         | 35348357 | G | 1 | 0.7143 | A |
| 23 | BICF2G630373376         | 35368731 | A | 0 | 0.2857 | G |
| 23 | BICF2G630373364         | 35379504 | G | 1 | 0.6429 | A |
| 23 | BICF2G630373360         | 35388174 | A | 1 | 0.3571 | G |
| 23 | BICF2G630373355         | 35392765 | A | 1 | 0.3571 | T |
| 23 | BICF2G630373346         | 35397729 | A | 1 | 0.6429 | G |
| 23 | BICF2G630373341         | 35398123 | G | 1 | 0.6429 | A |
| 23 | BICF2G630373322         | 35409166 | A | 1 | 0.6429 | G |
| 23 | BICF2G630373309         | 35428041 | G | 1 | 0.6429 | A |
| 23 | BICF2G630373300         | 35438683 | C | 1 | 0.6429 | G |
| 23 | BICF2G630373282         | 35449621 | A | 0 | 0.25   | G |
| 23 | BICF2G630373254         | 35465051 | A | 1 | 0.6429 | C |
| 23 | BICF2G630373231         | 35474437 | A | 0 | 0      | G |
| 23 | BICF2P866425            | 35475041 | C | 0 | 0      | A |
| 23 | BICF2G630373227         | 35480932 | A | 0 | 0      | G |
| 23 | BICF2P808177            | 35499915 | 0 | 0 | 0      | C |
| 23 | BICF2P293986            | 35510081 | 0 | 0 | 0      | G |
| 23 | BICF2S22926609          | 35513361 | A | 0 | 0      | G |
| 23 | BICF2S23145424          | 35555211 | 0 | 0 | 0      | A |
| 23 | BICF2P103123            | 35566065 | 0 | 0 | 0      | A |
| 23 | BICF2S2378067           | 35575347 | C | 0 | 0      | A |
| 23 | G1230f41S222            | 35634532 | 0 | 0 | 0      | C |
| 23 | G1231f31S13             | 35674046 | A | 1 | 1      | C |
| 23 | TIGRP2P304670_rs8750900 | 35685925 | 0 | 0 | 0      | G |
| 23 | BICF2G630373208         | 35697197 | G | 0 | 0      | A |
| 23 | BICF2P1358847           | 35727861 | A | 0 | 0      | C |
| 23 | BICF2P783013            | 35730860 | C | 0 | 0.2857 | G |
| 23 | BICF2P1064097           | 35742320 | C | 0 | 0      | A |
| 23 | BICF2G630373205         | 35765203 | G | 0 | 0      | A |
| 23 | BICF2S23128688          | 35779606 | G | 0 | 0.3571 | A |
| 23 | G1232f7S314             | 35813941 | 0 | 0 | 0      | C |
| 23 | BICF2S23722996          | 35833990 | A | 0 | 0.3571 | G |
| 23 | TIGRP2P304697_rs8707596 | 35842610 | A | 0 | 0.3571 | G |
| 23 | TIGRP2P304699_rs8943481 | 35848266 | G | 0 | 0.3571 | A |
| 23 | BICF2P605578            | 35868932 | T | 0 | 0.3571 | A |
| 23 | BICF2S23116435          | 35885482 | G | 0 | 0.3571 | A |
| 23 | BICF2P1203522           | 35897215 | C | 0 | 0.3    | A |
| 23 | BICF2P344052            | 35916471 | A | 0 | 0.3333 | T |
| 23 | BICF2P927830            | 35936864 | C | 0 | 0.3571 | G |
| 23 | BICF2P820412            | 35940517 | G | 0 | 0.3571 | A |



|    |                         |          |   |   |        |   |
|----|-------------------------|----------|---|---|--------|---|
| 23 | BICF2P1420439           | 35955693 | 0 | 0 | 0      | C |
| 23 | TIGRP2P304716_rs8936024 | 35963787 | G | 0 | 0.3571 | A |
| 23 | BICF2P557849            | 35973282 | A | 0 | 0.3571 | G |
| 23 | BICF2P65100             | 35989938 | A | 0 | 0.3    | G |
| 23 | BICF2P450178            | 36005334 | G | 0 | 0.3571 | A |
| 23 | TIGRP2P304731_rs9150978 | 36008715 | A | 0 | 0.3571 | C |
| 23 | BICF2G630373191         | 36028750 | G | 0 | 0      | A |
| 23 | TIGRP2P304733_rs8977811 | 36029594 | A | 0 | 0.3571 | C |
| 23 | BICF2P357569            | 36063831 | C | 0 | 0.3571 | A |
| 23 | BICF2P595445            | 36081298 | A | 0 | 0.3571 | G |
| 23 | BICF2P912117            | 36103549 | A | 0 | 0.3333 | G |
| 23 | BICF2S23911984          | 36118784 | A | 0 | 0.3    | G |
| 23 | BICF2P985426            | 36129196 | G | 0 | 0.3    | A |
| 23 | BICF2P52672             | 36134385 | A | 0 | 0.3571 | G |
| 23 | TIGRP2P304759_rs9178224 | 36148754 | 0 | 0 | 0      | G |
| 23 | BICF2G630373186         | 36172850 | A | 0 | 0      | G |
| 23 | BICF2P272127            | 36179093 | G | 0 | 0.3571 | A |
| 23 | BICF2P1287247           | 36229023 | G | 0 | 0.3571 | A |
| 23 | BICF2P1030583           | 36236737 | G | 0 | 0      | A |
| 23 | BICF2P1200460           | 36268176 | G | 0 | 0      | A |
| 23 | TIGRP2P304779_rs9174310 | 36301394 | A | 0 | 0      | G |
| 23 | BICF2G630373172         | 36329686 | A | 0 | 0      | G |
| 23 | TIGRP2P304787_rs9169794 | 36350216 | C | 0 | 0      | A |
| 23 | BICF2P374887            | 36359427 | A | 0 | 0      | C |
| 23 | BICF2G630373163         | 36366242 | A | 0 | 0      | G |
| 23 | BICF2P1233163           | 36378012 | G | 1 | 1      | A |
| 23 | BICF2S2399390           | 36392516 | 0 | 0 | 0      | A |
| 23 | BICF2G630373146         | 36427249 | A | 0 | 0      | G |
| 23 | BICF2G630373143         | 36439252 | A | 0 | 0      | C |
| 23 | TIGRP2P304796_rs9060553 | 36466256 | A | 0 | 0      | G |
| 23 | BICF2S23763194          | 36470558 | A | 0 | 0      | G |
| 23 | BICF2P530167            | 36481694 | G | 1 | 0.7143 | A |
| 23 | TIGRP2P304810_rs8956172 | 36494792 | G | 0 | 0      | A |
| 23 | BICF2P680952            | 36495440 | G | 0 | 0      | A |
| 23 | BICF2P356541            | 36501922 | A | 1 | 0.3571 | G |
| 23 | BICF2P356542            | 36502099 | A | 1 | 0.3333 | G |
| 23 | TIGRP2P304818_rs8886812 | 36514899 | A | 0 | 0.6429 | G |
| 23 | BICF2P1006996           | 36528734 | G | 1 | 0.3571 | A |
| 23 | BICF2S23332654          | 36555880 | A | 1 | 0.3571 | G |
| 23 | TIGRP2P304838_rs9110667 | 36564323 | A | 1 | 0.3571 | G |
| 23 | BICF2P791549            | 36570063 | C | 1 | 0.3    | A |
| 23 | BICF2P142906            | 36581875 | A | 1 | 0.3571 | C |
| 23 | BICF2P383705            | 36601459 | A | 0 | 0.3571 | G |
| 23 | BICF2G630373135         | 36607299 | A | 0 | 0      | G |
| 23 | BICF2P845341            | 36625397 | G | 1 | 0.3571 | A |
| 23 | BICF2G630373134         | 36633066 | A | 0 | 0      | G |
| 23 | BICF2S23659909          | 36647058 | A | 1 | 0.3571 | G |

|    |                         |          |   |   |        |   |
|----|-------------------------|----------|---|---|--------|---|
| 23 | BICF2P495575            | 36659820 | A | 1 | 0.3571 | G |
| 23 | BICF2P1344398           | 36667826 | C | 0 | 0.6429 | A |
| 23 | BICF2G630373129         | 36728337 | A | 0 | 0      | C |
| 23 | BICF2P169827            | 36731619 | G | 1 | 0.3571 | A |
| 23 | BICF2P717985            | 36742709 | G | 1 | 0.3571 | A |
| 23 | BICF2P62230             | 36759354 | 0 | 0 | 0      | C |
| 23 | BICF2S23154800          | 36769290 | G | 1 | 0.3571 | A |
| 23 | BICF2P508395            | 36782069 | G | 0 | 0.2857 | A |
| 23 | BICF2G630373114         | 36799256 | A | 0 | 0      | G |
| 23 | BICF2G630373112         | 36801184 | A | 0 | 0      | G |
| 23 | BICF2G630373082         | 36817118 | C | 0 | 0      | A |
| 23 | BICF2G630373074         | 36830909 | G | 0 | 0      | A |
| 23 | BICF2G630373063         | 36837864 | C | 0 | 0      | A |
| 23 | BICF2G630373050         | 36849277 | A | 0 | 0      | G |
| 23 | BICF2S2299959           | 36862869 | G | 0 | 0      | A |
| 23 | BICF2P493959            | 36878531 | G | 0 | 0      | A |
| 23 | BICF2P1389647           | 36882357 | G | 0 | 0      | A |
| 23 | BICF2P500369            | 36893831 | A | 0 | 0      | C |
| 23 | BICF2P666918            | 36906804 | A | 0 | 0      | G |
| 23 | BICF2P215607            | 36915166 | G | 0 | 0      | A |
| 23 | BICF2P1423277           | 36927722 | A | 0 | 0      | G |
| 23 | BICF2P1169501           | 36942575 | G | 0 | 0      | A |
| 23 | BICF2P779125            | 36951639 | A | 0 | 0      | G |
| 23 | TIGRP2P304933_rs8675516 | 36982495 | 0 | 0 | 0      | A |
| 23 | BICF2S23427082          | 36992559 | A | 0 | 0.2857 | G |
| 23 | BICF2G630373038         | 37002314 | G | 0 | 0.2857 | A |
| 23 | BICF2G630373033         | 37009090 | A | 0 | 0.2857 | C |
| 23 | TIGRP2P304943_rs8887650 | 37020407 | 0 | 0 | 0      | A |
| 23 | BICF2G630373007         | 37032395 | C | 0 | 0.2857 | A |
| 23 | BICF2G630372993         | 37044256 | G | 0 | 0.2857 | A |
| 23 | BICF2G630372978         | 37060337 | C | 0 | 0.2857 | A |
| 23 | BICF2P479300            | 37073835 | G | 0 | 0      | A |
| 23 | BICF2P1157888           | 37080704 | A | 0 | 0      | G |
| 23 | BICF2G630372973         | 37108738 | A | 0 | 0      | G |
| 23 | BICF2G630372958         | 37118711 | G | 0 | 0.2857 | A |
| 23 | BICF2G630372939         | 37126046 | A | 0 | 0.2857 | G |
| 23 | BICF2P1428202           | 37137768 | 0 | 0 | 0      | G |
| 23 | TIGRP2P304978_rs8887826 | 37148088 | A | 1 | 1      | G |
| 23 | BICF2S23327738          | 37163368 | A | 1 | 1      | G |
| 23 | BICF2P1138665           | 37176060 | T | 1 | 1      | A |
| 23 | BICF2G630372919         | 37184563 | A | 0 | 0      | G |
| 23 | BICF2P762819            | 37211993 | G | 1 | 1      | A |
| 23 | BICF2P932316            | 37216313 | A | 1 | 1      | C |
| 23 | BICF2S23749862          | 37229717 | G | 0 | 0.2857 | A |
| 23 | BICF2G630372916         | 37237505 | A | 0 | 0      | G |
| 23 | BICF2S22915789          | 37264798 | A | 0 | 0      | G |
| 23 | BICF2P693268            | 37281628 | 0 | 0 | 0      | A |

|    |                         |          |   |   |        |   |
|----|-------------------------|----------|---|---|--------|---|
| 23 | TIGRP2P305038_rs9204762 | 37287340 | 0 | 0 | 0      | G |
| 23 | BICF2S23612318          | 37298685 | 0 | 0 | 0      | A |
| 23 | TIGRP2P305039_rs8736269 | 37312630 | A | 0 | 0      | G |
| 23 | TIGRP2P305047_rs9188172 | 37324422 | A | 0 | 0      | G |
| 23 | BICF2G630372909         | 37333113 | A | 1 | 0.7143 | G |
| 23 | BICF2G630372829         | 37377075 | A | 1 | 0.7143 | G |
| 23 | BICF2G630372823         | 37386862 | G | 1 | 0.7143 | A |
| 23 | TIGRP2P305084_rs9167060 | 37409730 | 0 | 0 | 0      | C |
| 23 | BICF2G630372775         | 37424136 | A | 1 | 0.7143 | T |
| 23 | BICF2P166167            | 37440190 | 0 | 0 | 0      | A |
| 23 | BICF2G630372761         | 37450249 | G | 1 | 0.7143 | A |
| 23 | BICF2G630372759         | 37458228 | A | 1 | 0.7143 | G |
| 23 | BICF2G630372735         | 37471850 | G | 1 | 0.75   | A |
| 23 | BICF2G630372716         | 37491533 | A | 1 | 0.7143 | G |
| 23 | BICF2G630372704         | 37504388 | G | 1 | 0.7143 | A |
| 23 | BICF2G630372677         | 37519387 | G | 1 | 0.7143 | A |
| 23 | BICF2G630372673         | 37526607 | A | 1 | 0.7143 | G |
| 23 | BICF2G630372657         | 37540841 | C | 1 | 0.7143 | G |
| 23 | BICF2P1150075           | 37550831 | 0 | 0 | 0      | G |
| 23 | TIGRP2P305094_rs8540039 | 37561022 | 0 | 0 | 0      | G |
| 23 | BICF2P18072             | 37580324 | A | 0 | 0      | G |
| 23 | BICF2P354021            | 37583898 | C | 1 | 1      | A |
| 23 | BICF2S23239151          | 37614717 | G | 0 | 0      | A |
| 23 | BICF2P1427653           | 37620096 | G | 0 | 0      | A |
| 23 | TIGRP2P305120_rs9141117 | 37630025 | A | 0 | 0      | G |
| 23 | BICF2G630372636         | 37649988 | A | 0 | 0      | G |
| 23 | BICF2S22961866          | 37651806 | A | 0 | 0      | G |
| 23 | BICF2G630372608         | 37664501 | G | 0 | 0      | A |
| 23 | BICF2S22959699          | 37699076 | G | 0 | 0      | A |
| 23 | BICF2G630372597         | 37716934 | G | 0 | 0      | A |
| 23 | BICF2G630372581         | 37724990 | G | 0 | 0      | A |
| 23 | BICF2G630372555         | 37731747 | A | 0 | 0.2857 | G |
| 23 | BICF2P226459            | 37759501 | 0 | 0 | 0      | C |
| 23 | BICF2S23715901          | 37780241 | G | 0 | 0      | A |
| 23 | BICF2S23729777          | 37795391 | A | 0 | 0      | G |
| 23 | BICF2P842691            | 37822812 | 0 | 0 | 0      | C |
| 23 | BICF2P379294            | 37861452 | 0 | 0 | 0      | G |
| 23 | BICF2P180740            | 37878958 | A | 0 | 0      | G |
| 23 | BICF2G630372536         | 37893798 | G | 1 | 0.7    | A |
| 23 | BICF2G630372531         | 37913366 | G | 1 | 0.7    | A |
| 23 | BICF2G630372527         | 37926039 | G | 1 | 0.6429 | A |
| 23 | BICF2G630372522         | 37938218 | C | 1 | 0.6429 | A |
| 23 | BICF2G630372517         | 37945830 | A | 1 | 0.6429 | G |
| 23 | BICF2P346317            | 37957549 | G | 1 | 0.6429 | A |
| 23 | TIGRP2P305172_rs9147501 | 37970905 | 0 | 0 | 0      | A |
| 23 | BICF2G630372503         | 37976679 | A | 1 | 0.6429 | G |
| 23 | BICF2G630372499         | 37985943 | G | 1 | 0.6429 | A |

|    |                         |          |   |   |        |   |
|----|-------------------------|----------|---|---|--------|---|
| 23 | TIGRP2P305175_rs9063705 | 38002956 | 0 | 0 | 0      | A |
| 23 | BICF2G630372489         | 38016207 | A | 1 | 0.6429 | C |
| 23 | BICF2G630372487         | 38024140 | A | 1 | 0.6429 | G |
| 23 | BICF2G630372486         | 38033605 | G | 1 | 0.6429 | A |
| 23 | BICF2P642420            | 38044217 | A | 1 | 0.6429 | G |
| 23 | BICF2P541127            | 38068174 | 0 | 0 | 0      | G |
| 23 | BICF2G630372466         | 38079600 | G | 1 | 0.6429 | A |
| 23 | BICF2G630372454         | 38107894 | A | 0 | 0.2857 | C |
| 23 | BICF2G630372451         | 38138610 | G | 1 | 0.6429 | A |
| 23 | BICF2G630372435         | 38161841 | A | 0 | 0.2    | G |
| 23 | BICF2P125414            | 38171250 | G | 0 | 0.2857 | A |
| 23 | BICF2G630372411         | 38180914 | G | 1 | 0.7143 | A |
| 23 | TIGRP2P305186_rs8817975 | 38196470 | 0 | 0 | 0      | C |
| 23 | BICF2G630372405         | 38205682 | G | 0 | 0.6429 | A |
| 23 | BICF2G630372368         | 38236130 | A | 0 | 0.2857 | G |
| 23 | BICF2P564212            | 38246829 | A | 1 | 1      | G |
| 23 | BICF2G630372334         | 38259187 | A | 0 | 0.2857 | C |
| 23 | BICF2G630372310         | 38278291 | G | 1 | 0.7143 | A |
| 23 | BICF2G630372277         | 38307922 | C | 1 | 0.25   | A |
| 23 | BICF2G630372269         | 38318848 | C | 1 | 0.3571 | A |
| 23 | BICF2G630372264         | 38340072 | 0 | 0 | 0      | C |
| 23 | BICF2P94076             | 38349094 | G | 1 | 0.3571 | A |
| 23 | BICF2P14521             | 38355292 | A | 0 | 0      | G |
| 23 | BICF2G630372263         | 38365391 | 0 | 0 | 0      | G |
| 23 | BICF2G630372241         | 38378673 | C | 1 | 0.3571 | A |
| 23 | BICF2S23325540          | 38392559 | A | 1 | 0.3571 | G |
| 23 | BICF2G630372210         | 38403266 | 0 | 0 | 0      | A |
| 23 | BICF2G630372206         | 38411252 | G | 0 | 0.3571 | A |
| 23 | BICF2G630372180         | 38432271 | A | 0 | 0      | G |
| 23 | BICF2G630372171         | 38440387 | G | 0 | 0      | A |
| 23 | BICF2S23059148          | 38452617 | A | 0 | 0      | G |
| 23 | BICF2S23059149          | 38452916 | A | 0 | 0      | G |
| 23 | BICF2S23335144          | 38467331 | A | 1 | 0.7143 | G |
| 23 | BICF2G630372150         | 38469018 | A | 1 | 0.7143 | G |
| 23 | BICF2G630372137         | 38484337 | A | 1 | 0.7143 | C |
| 23 | BICF2G630372133         | 38491118 | A | 1 | 0.7143 | G |
| 23 | BICF2G630372115         | 38507757 | G | 1 | 0.3571 | A |
| 23 | BICF2G630372104         | 38520045 | G | 1 | 0.7143 | A |
| 23 | BICF2P793411            | 38529385 | G | 1 | 0.7143 | A |
| 23 | BICF2P1137132           | 38547834 | G | 0 | 0      | A |
| 23 | BICF2P408362            | 38548831 | G | 0 | 0      | A |
| 23 | BICF2G630372068         | 38564414 | G | 0 | 0.3571 | A |
| 23 | BICF2P902310            | 38590018 | C | 0 | 0      | A |
| 23 | BICF2G630372045         | 38595068 | A | 0 | 0.3571 | G |
| 23 | BICF2G630372041         | 38606701 | 0 | 0 | 0      | G |
| 23 | BICF2G630372039         | 38619595 | 0 | 0 | 0      | G |
| 23 | BICF2G630372024         | 38630713 | G | 0 | 0.3571 | A |

|    |                         |          |   |   |        |   |
|----|-------------------------|----------|---|---|--------|---|
| 23 | BICF2P24909             | 38650936 | A | 0 | 0      | G |
| 23 | BICF2G630372011         | 38651886 | A | 0 | 0      | G |
| 23 | BICF2G630371984         | 38669495 | A | 0 | 0      | G |
| 23 | BICF2S23440441          | 38678474 | A | 0 | 0      | G |
| 23 | BICF2G630371956         | 38687480 | A | 0 | 0      | G |
| 23 | BICF2S23218301          | 38705643 | A | 0 | 0.3571 | G |
| 23 | BICF2G630371924         | 38717517 | G | 0 | 0.3571 | A |
| 23 | BICF2G630371899         | 38754558 | A | 0 | 0.3333 | C |
| 23 | BICF2G630371892         | 38755628 | A | 0 | 0.3571 | G |
| 23 | BICF2G630371851         | 38775368 | G | 0 | 0.3571 | A |
| 23 | BICF2G630371833         | 38787035 | 0 | 0 | 0      | G |
| 23 | BICF2G630371802         | 38792324 | 0 | 0 | 0      | G |
| 23 | BICF2G630371792         | 38801325 | G | 0 | 0.3571 | A |
| 23 | BICF2G630371785         | 38804213 | G | 0 | 0      | A |
| 23 | BICF2G630371774         | 38812673 | 0 | 0 | 0      | G |
| 23 | BICF2G630371756         | 38834672 | 0 | 0 | 0      | G |
| 23 | BICF2G630371755         | 38839127 | 0 | 0 | 0      | A |
| 23 | BICF2G630371725         | 38858274 | A | 1 | 0.3571 | G |
| 23 | BICF2G630371712         | 38875802 | G | 0 | 0      | A |
| 23 | BICF2G630371692         | 38888728 | A | 0 | 0.6429 | C |
| 23 | BICF2G630371681         | 38897815 | A | 1 | 0.3571 | G |
| 23 | BICF2G630371667         | 38912459 | A | 1 | 0.3571 | C |
| 23 | TIGRP2P305284_rs8990612 | 38921157 | A | 0 | 0.2857 | G |
| 23 | BICF2P1110368           | 38929356 | A | 1 | 0.6429 | C |
| 23 | BICF2G630371596         | 38946128 | G | 0 | 0      | A |
| 23 | BICF2G630371591         | 38951897 | A | 0 | 0      | G |
| 23 | BICF2P128572            | 38970865 | G | 0 | 0      | A |
| 23 | BICF2G630371544         | 38974244 | G | 0 | 0.3571 | A |
| 23 | BICF2G630371512         | 38989072 | 0 | 0 | 0      | G |
| 23 | BICF2P821088            | 39004247 | A | 0 | 0.2857 | G |
| 23 | BICF2G630371503         | 39009583 | G | 0 | 0.2857 | A |
| 23 | BICF2G630371493         | 39015605 | C | 0 | 0.6429 | G |
| 23 | BICF2G630371476         | 39020291 | A | 0 | 0      | G |
| 23 | BICF2G630371444         | 39032771 | G | 1 | 0.3571 | A |
| 23 | BICF2G630371435         | 39051661 | G | 1 | 0.3571 | A |
| 23 | BICF2G630371426         | 39061761 | C | 1 | 0.3571 | A |
| 23 | BICF2G630371423         | 39062046 | G | 0 | 0.6429 | A |
| 23 | BICF2G630371411         | 39085679 | G | 0 | 0      | A |
| 23 | BICF2G630371385         | 39106204 | C | 1 | 0.3571 | A |
| 23 | BICF2G630371373         | 39115942 | G | 1 | 1      | A |
| 23 | BICF2P546166            | 39125558 | C | 1 | 0.3571 | A |
| 23 | BICF2G630371339         | 39138102 | G | 0 | 0      | A |
| 23 | BICF2G630371328         | 39153975 | G | 0 | 0      | A |
| 23 | BICF2G630371322         | 39157046 | T | 0 | 0      | A |
| 23 | BICF2G630371314         | 39164910 | A | 0 | 0      | T |
| 23 | BICF2G630371306         | 39169309 | G | 0 | 0      | A |
| 23 | BICF2P761195            | 39187054 | A | 0 | 0      | G |

|    |                         |          |   |   |        |   |
|----|-------------------------|----------|---|---|--------|---|
| 23 | TIGRP2P305352_rs8603589 | 39189482 | G | 0 | 0.6429 | A |
| 23 | BICF2P877558            | 39194895 | G | 0 | 0      | A |
| 23 | BICF2P1174581           | 39209352 | G | 0 | 0      | A |
| 23 | BICF2G630371264         | 39218789 | G | 0 | 0      | A |
| 23 | BICF2G630371254         | 39227971 | A | 0 | 0      | G |
| 23 | BICF2G630371215         | 39246371 | A | 0 | 0      | C |
| 23 | BICF2G630371198         | 39251672 | A | 0 | 0      | G |
| 23 | BICF2P1185802           | 39261279 | 0 | 0 | 0      | A |
| 23 | BICF2G630371184         | 39274458 | 0 | 0 | 0      | G |
| 23 | G1233f36S151            | 39297740 | A | 0 | 0      | G |
| 23 | TIGRP2P305378_rs8856298 | 39315078 | 0 | 0 | 0      | G |
| 23 | BICF2P94274             | 39319299 | 0 | 0 | 0      | G |
| 23 | BICF2P312668            | 39337750 | A | 0 | 0      | G |
| 23 | BICF2G630371178         | 39347929 | A | 0 | 0      | G |
| 23 | BICF2G630371171         | 39352449 | 0 | 0 | 0      | G |
| 23 | BICF2P567998            | 39352834 | G | 0 | 0      | A |
| 23 | BICF2G630371154         | 39371671 | G | 0 | 0      | A |
| 23 | BICF2P369619            | 39379357 | A | 0 | 0      | G |
| 23 | BICF2G630371127         | 39379450 | G | 0 | 0      | A |
| 23 | BICF2G630371114         | 39386817 | 0 | 0 | 0      | A |
| 23 | BICF2G630371104         | 39391677 | A | 0 | 0      | G |
| 23 | BICF2G630371055         | 39408882 | A | 0 | 0      | G |
| 23 | BICF2P1251594           | 39410583 | A | 0 | 0      | G |
| 23 | BICF2G630371014         | 39424938 | A | 0 | 0.2857 | G |
| 23 | BICF2G630370983         | 39436752 | G | 0 | 0.2857 | A |
| 23 | BICF2G630370982         | 39437735 | A | 1 | 0.6429 | G |
| 23 | BICF2G630370959         | 39445376 | G | 0 | 0      | A |
| 23 | BICF2G630370954         | 39452799 | G | 0 | 0      | A |
| 23 | BICF2G630370939         | 39459092 | G | 0 | 0      | A |
| 23 | BICF2S23621512          | 39482352 | A | 0 | 0.2857 | G |
| 23 | BICF2G630370897         | 39492270 | 0 | 0 | 0      | G |
| 23 | BICF2G630370883         | 39512262 | C | 1 | 0.3571 | G |
| 23 | BICF2G630370840         | 39523054 | G | 1 | 1      | A |
| 23 | BICF2G630370831         | 39530937 | A | 0 | 0      | G |
| 23 | TIGRP2P305414_rs9047204 | 39539330 | A | 0 | 0.3    | G |
| 23 | BICF2G630370786         | 39549605 | A | 0 | 0      | C |
| 23 | BICF2G630370762         | 39560719 | A | 0 | 0.2857 | G |
| 23 | BICF2G630370728         | 39572738 | A | 1 | 0.3571 | G |
| 23 | BICF2P1030449           | 39591964 | A | 0 | 0.2857 | G |
| 23 | BICF2G630370664         | 39595918 | A | 0 | 0.2857 | C |
| 23 | BICF2G630370628         | 39607096 | A | 0 | 0.2857 | C |
| 23 | BICF2S23136573          | 39623254 | A | 0 | 0.2857 | G |
| 23 | BICF2P818320            | 39629124 | A | 0 | 0.2857 | G |
| 23 | BICF2P911284            | 39657738 | A | 0 | 0.6429 | G |
| 23 | BICF2P737229            | 39664180 | A | 0 | 0      | G |
| 23 | BICF2S23633940          | 39686016 | A | 0 | 0.2857 | C |
| 23 | BICF2P237736            | 39686649 | A | 0 | 0.2857 | G |

|    |                         |          |   |   |        |   |
|----|-------------------------|----------|---|---|--------|---|
| 23 | BICF2P237735            | 39686666 | G | 0 | 0.2857 | A |
| 23 | BICF2P422296            | 39693193 | G | 0 | 0.3571 | A |
| 23 | BICF2P806805            | 39695772 | C | 0 | 0      | A |
| 23 | BICF2P69415             | 39715568 | G | 0 | 0.6429 | A |
| 23 | BICF2S23243089          | 39727447 | G | 1 | 0.7143 | A |
| 23 | TIGRP2P305463_rs9057028 | 39741204 | A | 0 | 0      | G |
| 23 | BICF2P1383805           | 39745591 | G | 0 | 0      | A |
| 23 | BICF2P737918            | 39767289 | A | 0 | 0.3571 | C |
| 23 | BICF2P1419915           | 39776564 | G | 0 | 0.6667 | A |
| 23 | BICF2P1054773           | 39781375 | A | 0 | 0.6429 | G |
| 23 | BICF2P149521            | 39796809 | G | 0 | 0.2857 | A |
| 23 | BICF2P887776            | 39808390 | G | 0 | 0.6429 | A |
| 23 | BICF2P500240            | 39816763 | 0 | 0 | 0      | G |
| 23 | BICF2P1178871           | 39824753 | A | 0 | 0.3333 | G |
| 23 | BICF2P409179            | 39837652 | A | 0 | 0      | G |
| 23 | BICF2P721706            | 39862712 | A | 0 | 0.3571 | C |
| 23 | BICF2P729651            | 39872790 | A | 0 | 0      | G |
| 23 | BICF2S23162407          | 39891184 | G | 1 | 0.7143 | A |
| 23 | BICF2S23155152          | 39907737 | A | 0 | 0      | G |
| 23 | BICF2S22927695          | 39935772 | A | 0 | 0      | C |
| 23 | BICF2S2364169           | 39948365 | C | 0 | 0      | A |
| 23 | BICF2P941324            | 39955944 | A | 0 | 0      | G |
| 23 | TIGRP2P305539_rs8588414 | 39964536 | A | 0 | 0      | G |
| 23 | BICF2P1216494           | 39987358 | G | 0 | 0      | A |
| 23 | TIGRP2P305555_rs8730111 | 40003431 | G | 0 | 0.3571 | A |
| 23 | BICF2S23336993          | 40012179 | A | 0 | 0      | G |
| 23 | BICF2S23435708          | 40030864 | A | 0 | 0.3571 | G |
| 23 | TIGRP2P305559_rs9184133 | 40041882 | A | 0 | 0.3571 | G |
| 23 | BICF2P95656             | 40059689 | 0 | 0 | 0      | G |
| 23 | TIGRP2P305564_rs8891899 | 40072772 | A | 1 | 0.3571 | G |
| 23 | BICF2P1092050           | 40078556 | G | 1 | 0.3571 | A |
| 23 | BICF2S23639158          | 40099472 | G | 0 | 0.3571 | A |
| 23 | BICF2P1440696           | 40118375 | A | 0 | 0      | C |
| 23 | BICF2P1243142           | 40131572 | 0 | 0 | 0      | G |
| 23 | BICF2P1171186           | 40135571 | 0 | 0 | 0      | T |
| 23 | BICF2S23732193          | 40147171 | G | 0 | 0      | C |
| 23 | BICF2P950516            | 40150012 | G | 0 | 0      | A |
| 23 | BICF2P636128            | 40158402 | A | 0 | 0      | G |
| 23 | BICF2P983640            | 40176155 | C | 0 | 0      | A |
| 23 | BICF2S2327121           | 40186124 | A | 1 | 1      | C |
| 23 | BICF2S2327122           | 40186143 | A | 1 | 1      | G |
| 23 | BICF2S2327123           | 40186235 | G | 1 | 1      | A |
| 23 | TIGRP2P305616_rs9184417 | 40192846 | G | 1 | 1      | A |
| 23 | BICF2P960228            | 40206076 | G | 1 | 1      | A |
| 23 | BICF2P678147            | 40218743 | G | 1 | 1      | A |
| 23 | BICF2S23514449          | 40236541 | G | 0 | 0.6429 | A |
| 23 | BICF2P401122            | 40238804 | G | 1 | 1      | A |

|    |                         |          |   |   |        |   |
|----|-------------------------|----------|---|---|--------|---|
| 23 | BICF2P1174783           | 40267504 | T | 0 | 0      | A |
| 23 | BICF2P1387355           | 40283702 | G | 1 | 0.3571 | A |
| 23 | BICF2P1506813           | 40295662 | A | 1 | 0.3571 | G |
| 23 | BICF2P438232            | 40306051 | C | 0 | 0      | A |
| 23 | BICF2P667659            | 40313276 | A | 1 | 0.3571 | C |
| 23 | BICF2P882955            | 40320667 | 0 | 0 | 0      | G |
| 23 | BICF2P163200            | 40330696 | G | 0 | 0      | A |
| 23 | BICF2S23726752          | 40348784 | G | 0 | 0.6429 | A |
| 23 | BICF2P1156029           | 40367065 | G | 1 | 0.3571 | A |
| 23 | BICF2P1234230           | 40380550 | A | 1 | 0.3571 | G |
| 23 | BICF2P1372526           | 40399457 | A | 0 | 0.6429 | G |
| 23 | BICF2S23024486          | 40408849 | A | 0 | 0.6429 | G |
| 23 | BICF2P1358852           | 40415278 | G | 1 | 0.3571 | A |
| 23 | BICF2S23160963          | 40425981 | A | 1 | 1      | G |
| 23 | BICF2P367935            | 40444042 | G | 1 | 0.3571 | A |
| 23 | BICF2P1405112           | 40461279 | A | 1 | 0.3571 | G |
| 23 | BICF2P245194            | 40474625 | G | 1 | 0.3571 | A |
| 23 | BICF2P1338180           | 40485148 | A | 1 | 0.3571 | G |
| 23 | BICF2P1225823           | 40512058 | G | 1 | 1      | A |
| 23 | BICF2P742810            | 40517010 | A | 1 | 0.3571 | G |
| 23 | BICF2P1259291           | 40530884 | A | 0 | 0.6429 | G |
| 23 | TIGRP2P305719_rs8923820 | 40561767 | A | 1 | 0.3571 | G |
| 23 | BICF2P1427241           | 40573918 | A | 1 | 0.3571 | G |
| 23 | TIGRP2P305728_rs8630928 | 40592092 | G | 0 | 0.6429 | A |
| 23 | BICF2P1061583           | 40602347 | G | 0 | 0.6429 | A |
| 23 | BICF2P442891            | 40610241 | A | 0 | 0.6429 | G |
| 23 | BICF2P1143851           | 40628474 | A | 1 | 0.3571 | G |
| 23 | BICF2S23234629          | 40630957 | C | 0 | 0      | A |
| 23 | TIGRP2P305744_rs8642479 | 40642224 | A | 0 | 0      | G |
| 23 | TIGRP2P305749_rs8953230 | 40661488 | A | 0 | 0.6429 | G |
| 23 | BICF2P406912            | 40671517 | C | 0 | 0      | A |
| 23 | BICF2P196607            | 40685575 | A | 0 | 0      | G |
| 23 | BICF2P990032            | 40689497 | C | 0 | 0.6429 | A |
| 23 | BICF2P59018             | 40707873 | A | 0 | 0      | G |
| 23 | BICF2P59014             | 40710425 | A | 0 | 0      | G |
| 23 | BICF2P912375            | 40725910 | G | 0 | 0.6429 | A |
| 23 | BICF2P981367            | 40746195 | A | 0 | 0      | G |
| 23 | BICF2P806470            | 40759910 | G | 0 | 0.6429 | A |
| 23 | BICF2P681737            | 40778427 | A | 0 | 0      | G |
| 23 | BICF2S23235992          | 40782579 | G | 0 | 0.6429 | A |
| 23 | BICF2S23512214          | 40797590 | A | 0 | 0.6429 | G |
| 23 | TIGRP2P305798_rs8798083 | 40806445 | A | 0 | 0.6429 | G |
| 23 | TIGRP2P305801_rs8624675 | 40815710 | A | 0 | 0      | G |
| 23 | BICF2P177645            | 40825287 | A | 0 | 0      | G |
| 23 | BICF2S233665            | 40838806 | G | 0 | 0      | A |
| 23 | TIGRP2P305805_rs8972160 | 40858277 | A | 0 | 0      | G |
| 23 | BICF2S23612816          | 40877069 | 0 | 0 | 0      | C |



|    |                         |          |   |   |        |   |
|----|-------------------------|----------|---|---|--------|---|
| 23 | BICF2P755605            | 40883826 | 0 | 0 | 0      | A |
| 23 | TIGRP2P305815_rs8964210 | 40906610 | G | 0 | 0      | A |
| 23 | BICF2P203235            | 40925060 | A | 0 | 0      | G |
| 23 | BICF2S2374403           | 40936302 | G | 0 | 0      | A |
| 23 | BICF2S23653878          | 40965317 | G | 0 | 0      | A |
| 23 | BICF2P1062              | 40982387 | A | 1 | 0.25   | C |
| 23 | BICF2S23451958          | 40992611 | C | 0 | 0      | A |
| 23 | BICF2P104413            | 41007099 | A | 1 | 0.3333 | G |
| 23 | BICF2P1099725           | 41012451 | A | 1 | 0.3571 | G |
| 23 | TIGRP2P305870_rs8666432 | 41027899 | A | 1 | 0.3571 | C |
| 23 | BICF2P830478            | 41032243 | A | 1 | 0.3571 | G |
| 23 | BICF2P278208            | 41048877 | 0 | 0 | 0      | G |
| 23 | BICF2P265702            | 41063321 | 0 | 0 | 0      | A |
| 23 | BICF2P653276            | 41071860 | G | 1 | 0.3571 | A |
| 23 | BICF2P432400            | 41079415 | 0 | 0 | 0      | G |
| 23 | BICF2P432399            | 41079613 | A | 1 | 0.3571 | G |
| 23 | BICF2P181652            | 41105590 | G | 1 | 0.3571 | A |
| 23 | BICF2P1143068           | 41113955 | T | 1 | 0.3571 | A |
| 23 | BICF2P138360            | 41125210 | A | 1 | 0.3571 | C |
| 23 | BICF2P518280            | 41144141 | G | 1 | 0.3571 | A |
| 23 | BICF2S22942123          | 41156510 | G | 0 | 0      | A |
| 23 | BICF2P6463              | 41163232 | 0 | 0 | 0      | A |
| 23 | BICF2P400703            | 41175144 | A | 0 | 0.6429 | G |
| 23 | BICF2P1433625           | 41188365 | G | 1 | 1      | A |
| 23 | BICF2S2364422           | 41199761 | 0 | 0 | 0      | G |
| 23 | BICF2P1258777           | 41205530 | C | 1 | 1      | A |
| 23 | BICF2P1125366           | 41217453 | A | 1 | 1      | G |
| 23 | BICF2P409665            | 41235510 | G | 1 | 1      | A |
| 23 | BICF2P10938             | 41250996 | G | 1 | 1      | A |
| 23 | BICF2S23617925          | 41297501 | A | 0 | 0      | G |
| 23 | BICF2P1324022           | 41318680 | 0 | 0 | 0      | G |
| 23 | BICF2S23012547          | 41333140 | G | 0 | 0.6429 | A |
| 23 | BICF2S23143718          | 41350374 | A | 0 | 0.6429 | C |
| 23 | BICF2P1085067           | 41355784 | 0 | 0 | 0      | G |
| 23 | BICF2P629691            | 41370049 | 0 | 0 | 0      | G |
| 23 | BICF2P30424             | 41380869 | 0 | 0 | 0      | A |
| 23 | BICF2S2328582           | 41401199 | A | 0 | 0      | C |
| 23 | BICF2P606117            | 41415537 | 0 | 0 | 0      | A |
| 23 | BICF2S2357009           | 41427957 | T | 1 | 0.3571 | A |
| 23 | BICF2S23514439          | 41435426 | G | 1 | 0.3333 | A |
| 23 | BICF2P982230            | 41464309 | G | 0 | 0      | A |
| 23 | BICF2P972625            | 41505902 | 0 | 0 | 0      | A |
| 23 | BICF2S2445389           | 41536499 | G | 0 | 0      | A |
| 23 | BICF2P874045            | 41540146 | 0 | 0 | 0      | G |
| 23 | BICF2P1063838           | 41560175 | A | 0 | 0      | G |
| 23 | TIGRP2P305907_rs8550769 | 41571901 | A | 1 | 1      | G |
| 23 | BICF2P881951            | 41578495 | G | 1 | 1      | A |

|    |                         |          |   |   |        |   |
|----|-------------------------|----------|---|---|--------|---|
| 23 | BICF2S23322214          | 41585214 | A | 1 | 1      | G |
| 23 | BICF2P569497            | 41601524 | 0 | 0 | 0      | G |
| 23 | BICF2P1058165           | 41608234 | A | 0 | 0      | C |
| 23 | TIGRP2P305924_rs9201666 | 41623140 | A | 0 | 0      | G |
| 23 | BICF2S23718644          | 41636558 | C | 0 | 0.6429 | G |
| 23 | TIGRP2P305926_rs9048396 | 41642220 | G | 0 | 0.6429 | A |
| 23 | BICF2P546121            | 41695955 | A | 0 | 0      | G |
| 23 | BICF2S23244464          | 41700517 | G | 0 | 0      | A |
| 23 | TIGRP2P305930_rs8881248 | 41720405 | A | 1 | 1      | G |
| 23 | BICF2S23259111          | 41723204 | C | 0 | 0      | A |
| 23 | BICF2P214096            | 41741139 | G | 0 | 0.6429 | A |
| 23 | BICF2P1198756           | 41754932 | G | 0 | 0      | A |
| 23 | BICF2P421248            | 41764227 | A | 0 | 0.6429 | G |
| 23 | TIGRP2P305950_rs9092701 | 41773614 | G | 0 | 0.6429 | A |
| 23 | BICF2P325034            | 41786505 | A | 0 | 0      | G |
| 23 | BICF2P103100            | 41794322 | A | 0 | 0      | G |
| 23 | BICF2P1403112           | 41804293 | A | 0 | 0      | C |
| 23 | BICF2P1403115           | 41805605 | A | 0 | 0.6429 | G |
| 23 | BICF2P76753             | 41835334 | G | 0 | 0.6429 | C |
| 23 | BICF2P853806            | 41846175 | A | 0 | 0      | T |
| 23 | BICF2S22914651          | 41851151 | G | 0 | 0      | A |
| 23 | BICF2P1211681           | 41860159 | G | 0 | 0      | A |
| 23 | BICF2P1278860           | 41872461 | A | 0 | 0      | G |
| 23 | BICF2P1099127           | 41893674 | T | 0 | 0      | A |
| 23 | BICF2P521644            | 41905656 | A | 0 | 0.2857 | G |
| 23 | BICF2P989001            | 41910765 | A | 0 | 0.2857 | G |
| 23 | BICF2S23041707          | 41924493 | A | 1 | 1      | G |
| 23 | BICF2P1038474           | 41929772 | G | 0 | 0.2857 | A |
| 23 | BICF2P870380            | 41947670 | G | 1 | 0.7143 | A |
| 23 | BICF2S23552922          | 41952727 | A | 1 | 0.75   | C |
| 23 | BICF2S22945124          | 41964558 | G | 1 | 0.7143 | A |
| 23 | BICF2S2352812           | 41980275 | G | 1 | 0.7143 | A |
| 23 | BICF2S23331147          | 41995382 | A | 0 | 0      | G |
| 23 | BICF2P153598            | 41999259 | G | 1 | 1      | C |
| 23 | BICF2S23158214          | 42022700 | G | 1 | 1      | A |
| 23 | TIGRP2P305986_rs8836579 | 42032683 | A | 0 | 0.2857 | G |
| 23 | BICF2P738162            | 42044041 | A | 0 | 0.25   | C |
| 23 | BICF2S22942224          | 42064417 | 0 | 0 | 0      | G |
| 23 | BICF2P469423            | 42067943 | A | 1 | 0.7143 | G |
| 23 | TIGRP2P306003_rs8593710 | 42086122 | G | 0 | 0      | A |
| 23 | TIGRP2P306011_rs8949284 | 42109379 | A | 1 | 1      | G |
| 23 | BICF2P231715            | 42121075 | G | 1 | 0.7143 | C |
| 23 | BICF2P132704            | 42126597 | G | 0 | 0      | A |
| 23 | TIGRP2P306018_rs8806962 | 42147311 | A | 1 | 1      | G |
| 23 | BICF2P1252557           | 42157115 | G | 0 | 0      | A |
| 23 | BICF2P1252556           | 42157518 | G | 0 | 0      | A |
| 23 | BICF2P372925            | 42165282 | G | 0 | 0      | A |

|    |                         |          |   |   |        |   |
|----|-------------------------|----------|---|---|--------|---|
| 23 | BICF2S23350534          | 42171390 | A | 1 | 0.3333 | C |
| 23 | BICF2P183479            | 42184210 | A | 0 | 0.2857 | T |
| 23 | BICF2P820378            | 42194137 | 0 | 0 | 0      | C |
| 23 | BICF2P1035796           | 42208934 | A | 1 | 1      | G |
| 23 | BICF2P647136            | 42226743 | C | 1 | 0.7143 | A |
| 23 | BICF2P1188655           | 42232155 | C | 0 | 0      | A |
| 23 | BICF2P1188656           | 42232559 | A | 1 | 1      | G |
| 23 | BICF2S2329222           | 42240649 | 0 | 0 | 0      | G |
| 23 | BICF2S23151082          | 42256015 | A | 0 | 0      | G |
| 23 | TIGRP2P306045_rs8776712 | 42270183 | C | 0 | 0      | A |
| 23 | TIGRP2P306052_rs9129208 | 42279148 | G | 0 | 0      | A |
| 23 | BICF2S23046258          | 42295373 | G | 0 | 0      | A |
| 23 | BICF2S23740292          | 42301636 | G | 0 | 0.2857 | A |
| 23 | TIGRP2P306084_rs8940898 | 42315525 | C | 1 | 0.6429 | G |
| 23 | BICF2P1248355           | 42321770 | G | 1 | 0.6429 | C |
| 23 | BICF2P743193            | 42342246 | A | 0 | 0.2857 | G |
| 23 | BICF2P823209            | 42351330 | A | 0 | 0.2857 | G |
| 23 | BICF2S2335948           | 42362151 | A | 0 | 0.2857 | G |
| 23 | BICF2S24511683          | 42367945 | A | 0 | 0.6429 | G |
| 23 | BICF2S23021083          | 42381306 | G | 0 | 0      | A |
| 23 | BICF2P1145575           | 42395436 | G | 0 | 0.6429 | A |
| 23 | BICF2S23453397          | 42401428 | A | 0 | 0.25   | G |
| 23 | TIGRP2P306114_rs8981370 | 42412176 | A | 1 | 0.4286 | G |
| 23 | TIGRP2P306119_rs8492617 | 42427976 | A | 0 | 0      | G |
| 23 | BICF2S23218827          | 42435710 | A | 0 | 0.2143 | G |
| 23 | BICF2S23720800          | 42447466 | A | 1 | 0.7857 | G |
| 23 | BICF2P493175            | 42471608 | 0 | 0 | 0      | G |
| 23 | BICF2S23544334          | 42484228 | A | 0 | 0.3571 | G |
| 23 | BICF2S235967            | 42494977 | A | 1 | 0.4286 | G |
| 23 | BICF2S23431992          | 42520536 | A | 0 | 0.3    | G |
| 23 | BICF2S2318816           | 42532331 | G | 0 | 0      | A |
| 23 | BICF2P863775            | 42560900 | 0 | 0 | 0      | A |
| 23 | BICF2S23349181          | 42563440 | A | 0 | 0      | C |
| 23 | TIGRP2P306156_rs8725292 | 42576471 | G | 0 | 0.2143 | A |
| 23 | TIGRP2P306164_rs9121446 | 42585370 | A | 0 | 0.5714 | G |
| 23 | BICF2P1353081           | 42601853 | C | 1 | 0.6429 | A |
| 23 | BICF2P1193771           | 42606829 | G | 0 | 0      | A |
| 23 | BICF2P1193773           | 42608541 | G | 0 | 0.2143 | A |
| 23 | BICF2P894422            | 42619672 | A | 1 | 0.7857 | G |
| 23 | TIGRP2P306183_rs9173848 | 42633962 | T | 0 | 0      | A |
| 23 | BICF2P815885            | 42650081 | G | 1 | 0.4286 | A |
| 23 | BICF2S23038752          | 42656437 | 0 | 0 | 0      | G |
| 23 | BICF2P546393            | 42669790 | G | 0 | 0.3571 | A |
| 23 | BICF2P781179            | 42680248 | A | 1 | 0.4286 | G |
| 23 | BICF2P376948            | 42684738 | T | 0 | 0.3571 | A |
| 23 | BICF2P1156012           | 42695086 | A | 0 | 0      | T |
| 23 | BICF2P104442            | 42725212 | 0 | 0 | 0      | A |

|    |                         |          |   |   |        |   |
|----|-------------------------|----------|---|---|--------|---|
| 23 | BICF2P621110            | 42745166 | A | 0 | 0.5714 | G |
| 23 | BICF2P834360            | 42750249 | G | 1 | 1      | A |
| 23 | BICF2P1269015           | 42758327 | A | 0 | 0.5714 | G |
| 23 | BICF2S23260538          | 42766834 | A | 0 | 0.5714 | G |
| 23 | TIGRP2P306215_rs9229824 | 42778188 | G | 1 | 0.4286 | A |
| 23 | BICF2P793060            | 42791566 | A | 0 | 0.3571 | G |
| 23 | BICF2S23730986          | 42820859 | A | 1 | 0.7857 | C |
| 23 | BICF2S23713895          | 42832462 | A | 1 | 0.7857 | G |
| 23 | TIGRP2P306222_rs8787122 | 42842975 | 0 | 0 | 0      | A |
| 23 | TIGRP2P306224_rs8763593 | 42851692 | 0 | 0 | 0      | G |
| 23 | G1234f39S73             | 42878444 | A | 1 | 0.7857 | C |
| 23 | BICF2P771847            | 42901658 | 0 | 0 | 0      | A |
| 23 | BICF2S22927669          | 42911036 | G | 0 | 0.2143 | A |
| 23 | BICF2S23751841          | 42940955 | A | 0 | 0      | C |
| 23 | BICF2P318244            | 42943191 | 0 | 0 | 0      | G |
| 23 | BICF2S22962096          | 42960631 | G | 0 | 0.3333 | A |
| 23 | BICF2S22962355          | 42964436 | C | 0 | 0.3571 | G |
| 23 | BICF2P1030407           | 42996277 | A | 0 | 0      | C |
| 23 | BICF2P1366070           | 43004260 | A | 0 | 0      | G |
| 23 | BICF2P186193            | 43021065 | 0 | 0 | 0      | C |
| 23 | BICF2P551172            | 43024669 | A | 0 | 0.5833 | G |
| 23 | BICF2P1188629           | 43037837 | G | 1 | 0.4286 | A |
| 23 | BICF2P1427951           | 43054683 | A | 0 | 0.2143 | G |
| 23 | BICF2P8065              | 43058239 | G | 0 | 0.2143 | A |
| 23 | BICF2P790354            | 43070526 | C | 0 | 0      | G |
| 23 | BICF2P1414094           | 43094782 | A | 0 | 0      | C |
| 23 | BICF2S2375344           | 43094850 | G | 0 | 0      | A |
| 23 | BICF2P367016            | 43102781 | A | 1 | 0.7857 | G |
| 23 | BICF2P979029            | 43104394 | G | 1 | 0.4286 | A |
| 23 | BICF2P697262            | 43123818 | A | 0 | 0      | G |
| 23 | TIGRP2P306247_rs8871382 | 43126855 | A | 0 | 0      | G |
| 23 | BICF2P225942            | 43138975 | 0 | 0 | 0      | G |
| 23 | BICF2P823732            | 43150859 | 0 | 0 | 0      | A |
| 23 | BICF2P438395            | 43169359 | C | 0 | 0      | G |
| 23 | TIGRP2P306257_rs9067162 | 43173666 | A | 0 | 0      | C |
| 23 | BICF2P1029799           | 43203389 | A | 0 | 0      | G |
| 23 | BICF2P1454741           | 43210885 | A | 1 | 0.4286 | C |
| 23 | BICF2P293062            | 43217146 | G | 0 | 0.1667 | A |
| 23 | BICF2P556894            | 43230407 | G | 1 | 0.4286 | A |
| 23 | TIGRP2P306292_rs9041144 | 43247327 | A | 0 | 0      | T |
| 23 | BICF2P148022            | 43272438 | A | 0 | 0      | G |
| 23 | BICF2P94413             | 43279533 | G | 0 | 0.2143 | A |
| 23 | BICF2S23432511          | 43308637 | G | 0 | 0.2143 | A |
| 23 | BICF2P199761            | 43314918 | A | 1 | 0.6429 | C |
| 23 | BICF2P105603            | 43326481 | A | 0 | 0.2143 | G |
| 23 | BICF2P251151            | 43336895 | G | 0 | 0.2143 | A |
| 23 | BICF2P57124             | 43346880 | A | 0 | 0.2143 | G |

|    |                         |          |   |   |        |   |
|----|-------------------------|----------|---|---|--------|---|
| 23 | BICF2P517997            | 43362096 | A | 1 | 0.6429 | G |
| 23 | BICF2P439945            | 43372745 | 0 | 0 | 0      | G |
| 23 | BICF2P236141            | 43384544 | A | 0 | 0.2143 | G |
| 23 | BICF2P200182            | 43385126 | A | 1 | 1      | G |
| 23 | BICF2P533996            | 43395452 | A | 0 | 0      | G |
| 23 | TIGRP2P306306_rs8926625 | 43406693 | 0 | 0 | 0      | A |
| 23 | TIGRP2P306324_rs8993896 | 43423623 | T | 0 | 0.3571 | A |
| 23 | BICF2P1049325           | 43426609 | T | 0 | 0.3571 | A |
| 23 | BICF2P1179168           | 43449637 | A | 1 | 0.4286 | G |
| 23 | BICF2P1253490           | 43466705 | A | 0 | 0      | T |
| 23 | BICF2P871102            | 43484125 | A | 1 | 0.7857 | G |
| 23 | BICF2P425647            | 43500138 | A | 0 | 0.3571 | G |
| 23 | TIGRP2P306370_rs9064756 | 43514493 | A | 1 | 0.4286 | G |
| 23 | TIGRP2P306371_rs8857715 | 43518749 | G | 1 | 0.4286 | A |
| 23 | BICF2P472925            | 43530367 | G | 1 | 0.6429 | A |
| 23 | BICF2P1393341           | 43549027 | A | 1 | 0.4286 | C |
| 23 | TIGRP2P306383_rs9170804 | 43552903 | A | 1 | 0.6429 | G |
| 23 | BICF2S23229071          | 43569694 | A | 0 | 0.3571 | G |
| 23 | BICF2P414296            | 43586235 | A | 0 | 0      | G |
| 23 | BICF2S23758404          | 43604767 | C | 0 | 0.3333 | A |
| 23 | BICF2P797806            | 43612185 | 0 | 0 | 0      | A |
| 23 | BICF2P404119            | 43627997 | C | 0 | 0.5714 | G |
| 23 | BICF2P531271            | 43635161 | A | 0 | 0.5714 | G |
| 23 | BICF2P921418            | 43646291 | G | 0 | 0      | A |
| 23 | BICF2P1148836           | 43657982 | G | 1 | 1      | A |
| 23 | BICF2S23530215          | 43668882 | A | 0 | 0      | G |
| 23 | BICF2P249608            | 43678191 | C | 0 | 0      | A |
| 23 | BICF2P456924            | 43693506 | A | 1 | 0.4286 | G |
| 23 | BICF2P825058            | 43705160 | G | 1 | 0.4286 | A |
| 23 | BICF2P797468            | 43726560 | A | 0 | 0      | G |
| 23 | BICF2P700726            | 43739023 | G | 0 | 0      | A |
| 23 | BICF2S2413418           | 43747391 | A | 0 | 0      | G |
| 23 | BICF2P61759             | 43761067 | A | 1 | 0.6667 | G |
| 23 | BICF2P347079            | 43789959 | A | 0 | 0.3571 | C |
| 23 | BICF2P745403            | 43802616 | G | 0 | 0      | A |
| 23 | BICF2P713649            | 43809677 | 0 | 0 | 0      | G |
| 23 | BICF2S2303966           | 43819052 | G | 0 | 0.2143 | A |
| 23 | BICF2S2324015           | 43829699 | A | 0 | 0      | G |
| 23 | TIGRP2P306486_rs9115088 | 43842775 | G | 1 | 0.6429 | A |
| 23 | BICF2S23629682          | 43854235 | A | 0 | 0.2143 | G |
| 23 | BICF2P1437017           | 43866306 | G | 0 | 0      | A |
| 23 | BICF2S23712658          | 43883322 | A | 1 | 0.6429 | C |
| 23 | BICF2S23538496          | 43886196 | A | 0 | 0      | G |
| 23 | BICF2P192940            | 43897677 | 0 | 0 | 0      | A |
| 23 | BICF2S23231567          | 43915422 | A | 0 | 0.2143 | G |
| 23 | BICF2P1338460           | 43933399 | 0 | 0 | 0      | A |
| 23 | TIGRP2P306505_rs8994887 | 43946235 | 0 | 0 | 0      | A |

|    |                         |          |   |   |        |   |
|----|-------------------------|----------|---|---|--------|---|
| 23 | BICF2S24110205          | 43962398 | A | 0 | 0      | G |
| 23 | G1235f39S275            | 43983437 | G | 1 | 0.6429 | A |
| 23 | BICF2S2378346           | 44001025 | C | 1 | 0.6429 | A |
| 23 | BICF2S23315132          | 44013903 | A | 1 | 0.6429 | G |
| 23 | BICF2P1415290           | 44029077 | A | 0 | 0.3571 | G |
| 23 | BICF2P1192865           | 44036593 | 0 | 0 | 0      | A |
| 23 | BICF2P432034            | 44050261 | A | 0 | 0      | T |
| 23 | BICF2P457418            | 44061028 | G | 1 | 1      | A |
| 23 | BICF2P461500            | 44074861 | A | 0 | 0      | G |
| 23 | BICF2P275043            | 44086773 | G | 0 | 0      | A |
| 23 | BICF2P138119            | 44102379 | G | 0 | 0      | A |
| 23 | BICF2P1072420           | 44111360 | G | 0 | 0      | A |
| 23 | BICF2P583197            | 44126189 | A | 0 | 0      | C |
| 23 | BICF2P290450            | 44138717 | C | 0 | 0      | A |
| 23 | BICF2P1272280           | 44165048 | A | 0 | 0      | G |
| 23 | BICF2S23439949          | 44182599 | G | 1 | 0.7    | A |
| 23 | BICF2P463710            | 44196630 | A | 0 | 0      | G |
| 23 | BICF2P1284520           | 44209583 | G | 0 | 0      | A |
| 23 | TIGRP2P306526_rs8596322 | 44226343 | 0 | 0 | 0      | G |
| 23 | BICF2S23031515          | 44240098 | G | 1 | 0.6429 | A |
| 23 | BICF2P960780            | 44251628 | 0 | 0 | 0      | A |
| 23 | BICF2P1066818           | 44259098 | 0 | 0 | 0      | A |
| 23 | BICF2P366471            | 44267744 | G | 0 | 0      | A |
| 23 | BICF2P263751            | 44284984 | G | 0 | 0      | C |
| 23 | BICF2P94312             | 44305852 | A | 0 | 0      | G |
| 23 | BICF2P1385541           | 44310556 | G | 0 | 0      | A |
| 23 | BICF2P329457            | 44331177 | G | 0 | 0      | A |
| 23 | BICF2P1261185           | 44339014 | A | 0 | 0      | G |
| 23 | BICF2S23316382          | 44349751 | G | 1 | 0.4286 | A |
| 23 | BICF2P1142479           | 44361543 | G | 0 | 0      | A |
| 23 | BICF2S23148746          | 44377429 | A | 1 | 0.4286 | G |
| 23 | TIGRP2P306546_rs8764631 | 44379015 | A | 0 | 0.3571 | G |
| 23 | BICF2S22933213          | 44392329 | 0 | 0 | 0      | A |
| 23 | BICF2S23253945          | 44401822 | A | 0 | 0.3571 | T |
| 23 | TIGRP2P306562_rs8892935 | 44418291 | A | 0 | 0.2143 | G |
| 23 | BICF2S22933334          | 44433351 | A | 0 | 0      | C |
| 23 | BICF2P908000            | 44444684 | G | 0 | 0.2143 | A |
| 23 | BICF2P383035            | 44452402 | A | 0 | 0.3571 | G |
| 23 | BICF2P324626            | 44472876 | G | 0 | 0      | A |
| 23 | BICF2P278352            | 44483233 | A | 0 | 0      | G |
| 23 | BICF2S2319632           | 44504021 | A | 0 | 0.2143 | G |
| 23 | BICF2P991623            | 44527314 | G | 1 | 0.4286 | A |
| 23 | BICF2P991619            | 44529064 | A | 0 | 0      | G |
| 23 | BICF2P1284348           | 44540627 | C | 1 | 0.4286 | A |
| 23 | BICF2S23147710          | 44553825 | C | 1 | 0.4286 | A |
| 23 | BICF2S23156313          | 44565862 | A | 0 | 0.5714 | G |
| 23 | BICF2P1046846           | 44574640 | G | 0 | 0.5714 | A |

|    |                         |          |   |   |        |   |
|----|-------------------------|----------|---|---|--------|---|
| 23 | BICF2P703585            | 44596301 | A | 0 | 0.5714 | G |
| 23 | BICF2P988572            | 44611642 | G | 0 | 0      | A |
| 23 | BICF2P210815            | 44625449 | A | 0 | 0      | C |
| 23 | BICF2S23533343          | 44642741 | G | 0 | 0      | A |
| 23 | BICF2P1112997           | 44661686 | 0 | 0 | 0      | A |
| 23 | TIGRP2P306662_rs8613244 | 44677588 | G | 1 | 0.4286 | C |
| 23 | TIGRP2P306673_rs8609770 | 44690148 | C | 0 | 0.3571 | G |
| 23 | BICF2P990881            | 44701189 | A | 0 | 0      | G |
| 23 | BICF2P1127186           | 44715797 | C | 1 | 0.4286 | G |
| 23 | BICF2P234104            | 44756450 | A | 1 | 0.4286 | C |
| 23 | BICF2P172891            | 44760851 | A | 0 | 0.2143 | G |
| 23 | BICF2P124614            | 44778679 | G | 0 | 0      | A |
| 23 | BICF2S23233931          | 44787148 | A | 1 | 0.4286 | G |
| 23 | BICF2P864569            | 44814053 | A | 0 | 0.3571 | G |
| 23 | BICF2P762664            | 44822035 | G | 0 | 0.5714 | A |
| 23 | BICF2S23021112          | 44835248 | G | 0 | 0      | A |
| 23 | BICF2P777080            | 44842718 | G | 0 | 0      | A |
| 23 | TIGRP2P306711_rs9231825 | 44859063 | G | 0 | 0.5714 | A |
| 23 | TIGRP2P306713_rs8698364 | 44864431 | G | 0 | 0.5714 | A |
| 23 | BICF2S23661805          | 44881411 | G | 0 | 0      | A |
| 23 | BICF2S2363127           | 44887856 | A | 0 | 0      | C |
| 23 | BICF2P1494550           | 44906081 | A | 1 | 1      | C |
| 23 | BICF2S23426578          | 44939947 | A | 0 | 0      | G |
| 23 | BICF2P73986             | 44946087 | A | 0 | 0      | G |
| 23 | BICF2P290518            | 44957819 | T | 1 | 0.7857 | A |
| 23 | BICF2P769247            | 44970169 | 0 | 0 | 0      | G |
| 23 | BICF2S24110546          | 44981216 | 0 | 0 | 0      | A |
| 23 | TIGRP2P306732_rs8880121 | 45009272 | 0 | 0 | 0      | G |
| 23 | BICF2P153488            | 45023711 | 0 | 0 | 0      | C |
| 23 | BICF2P235175            | 45049563 | G | 0 | 0.3571 | A |
| 23 | BICF2P153858            | 45058234 | G | 0 | 0      | A |
| 23 | TIGRP2P306740_rs8607513 | 45072495 | T | 1 | 0.7857 | A |
| 23 | BICF2P1177130           | 45075941 | G | 0 | 0      | A |
| 23 | BICF2S2314411           | 45085997 | A | 0 | 0      | C |
| 23 | BICF2P1284999           | 45093173 | G | 0 | 0      | A |
| 23 | BICF2P1376175           | 45108651 | C | 0 | 0      | A |
| 23 | BICF2P99124             | 45120037 | G | 1 | 0.4286 | A |
| 23 | TIGRP2P306755_rs8511939 | 45127859 | A | 0 | 0.3571 | G |
| 23 | BICF2P372627            | 45144536 | C | 1 | 0.6429 | A |
| 23 | BICF2P187265            | 45155312 | G | 1 | 0.4286 | A |
| 23 | BICF2S23631304          | 45163005 | 0 | 0 | 0      | G |
| 23 | TIGRP2P306763_rs8974003 | 45175049 | A | 1 | 0.4167 | G |
| 23 | TIGRP2P306768_rs8982601 | 45198760 | A | 1 | 0.4286 | G |
| 23 | BICF2P1190421           | 45210054 | A | 0 | 0.2143 | G |
| 23 | BICF2P361218            | 45219826 | A | 0 | 0.2143 | G |
| 23 | BICF2P934656            | 45230908 | G | 1 | 0.4286 | A |
| 23 | BICF2P407928            | 45246248 | C | 0 | 0.2143 | A |

|    |                         |          |   |    |        |   |
|----|-------------------------|----------|---|----|--------|---|
| 23 | BICF2P799970            | 45252811 | G | 0  | 0.2143 | A |
| 23 | BICF2S23518981          | 45265515 | G | 0  | 0.2143 | A |
| 23 | BICF2P88225             | 45280813 | A | 1  | 0.6429 | G |
| 23 | BICF2S23619360          | 45296344 | A | 0  | 0.2143 | G |
| 23 | BICF2P986280            | 45299361 | A | 0  | 0.2143 | T |
| 23 | BICF2P364821            | 45320734 | 0 | 0  | 0      | G |
| 23 | BICF2S23440459          | 45334851 | G | 0  | 0      | A |
| 23 | BICF2P762700            | 45348897 | G | 0  | 0      | A |
| 23 | BICF2P365804            | 45381895 | 0 | 0  | 0      | A |
| 23 | BICF2P1166195           | 45391727 | A | 0  | 0      | C |
| 23 | TIGRP2P306808_rs9027638 | 45419665 | A | 0  | 0      | G |
| 23 | BICF2P392033            | 45432825 | A | 0  | 0      | T |
| 23 | TIGRP2P306816_rs8778910 | 45437159 | A | 0  | 0      | C |
| 23 | TIGRP2P306824_rs9123749 | 45452027 | G | 0  | 0      | A |
| 23 | BICF2P258753            | 45461628 | A | 0  | 0      | C |
| 23 | TIGRP2P306839_rs8745718 | 45485220 | G | 1  | 0.6429 | A |
| 23 | BICF2P115565            | 45497779 | G | 1  | 1      | A |
| 23 | TIGRP2P306852_rs8956012 | 45505597 | A | 1  | 1      | C |
| 23 | BICF2S241326            | 45523675 | G | 0  | 0      | A |
| 23 | BICF2P7791              | 45530709 | A | NA | 0.3333 | C |
| 23 | BICF2P789674            | 45549471 | G | 1  | 0.7857 | A |
| 23 | BICF2P508775            | 45556883 | A | 1  | 1      | G |
| 23 | BICF2S2376773           | 45565749 | A | 0  | 0.2143 | G |
| 23 | BICF2P1284837           | 45583784 | A | 1  | 0.4286 | G |
| 23 | BICF2P905624            | 45596179 | C | 1  | 0.6429 | A |
| 23 | BICF2P827545            | 45603382 | T | 1  | 0.7143 | A |
| 23 | TIGRP2P306866_rs8710909 | 45610423 | A | 0  | 0.6429 | G |
| 23 | BICF2S23025317          | 45631055 | G | 1  | 0.7143 | A |
| 23 | BICF2P1274431           | 45634234 | G | 0  | 0.2857 | A |
| 23 | BICF2P779267            | 45652053 | G | 1  | 0.3571 | A |
| 23 | BICF2P621103            | 45659674 | A | 1  | 1      | G |
| 23 | TIGRP2P306898_rs8606978 | 45668165 | G | 1  | 1      | A |
| 23 | TIGRP2P306899_rs8839783 | 45685563 | 0 | 0  | 0      | G |
| 23 | BICF2P141523            | 45689816 | A | 0  | 0.2857 | C |
| 23 | BICF2P598634            | 45720739 | 0 | 0  | 0      | G |
| 23 | BICF2S23136188          | 45730253 | A | 1  | 0.7143 | G |
| 23 | TIGRP2P306919_rs8517513 | 45738600 | G | 1  | 0.3571 | A |
| 23 | TIGRP2P306952_rs8567604 | 45759813 | G | 0  | 0      | A |
| 23 | BICF2S23340761          | 45774812 | A | 0  | 0      | C |
| 23 | BICF2P888943            | 45785785 | A | 0  | 0      | G |
| 23 | BICF2P735426            | 45797338 | G | 0  | 0      | A |
| 23 | TIGRP2P306964_rs8929540 | 45815069 | A | 0  | 0      | G |
| 23 | BICF2P373838            | 45827274 | A | 0  | 0      | G |
| 23 | TIGRP2P306975_rs8850187 | 45845981 | A | 0  | 0      | G |
| 23 | BICF2P1144428           | 45856072 | A | 0  | 0      | G |
| 23 | BICF2P458186            | 45865422 | A | 0  | 0      | G |
| 23 | BICF2P10455             | 45879822 | A | 0  | 0      | G |



|    |                         |          |   |   |        |   |
|----|-------------------------|----------|---|---|--------|---|
| 23 | BICF2S22914284          | 45885977 | G | 0 | 0      | A |
| 23 | BICF2P710798            | 45898386 | G | 0 | 0      | A |
| 23 | BICF2P810727            | 45913684 | 0 | 0 | 0      | C |
| 23 | BICF2S23143573          | 45923809 | A | 0 | 0.3571 | C |
| 23 | TIGRP2P307005_rs8593362 | 45938171 | A | 1 | 0.7143 | C |
| 23 | BICF2S23132017          | 45940162 | A | 0 | 0      | G |
| 23 | TIGRP2P307007_rs8580852 | 45944017 | 0 | 0 | 0      | G |
| 23 | TIGRP2P307011_rs9073481 | 45958418 | A | 0 | 0      | C |
| 23 | TIGRP2P307017_rs9081478 | 45966816 | A | 0 | 0      | G |
| 23 | BICF2S23741797          | 45978957 | A | 0 | 0      | G |
| 23 | TIGRP2P307033_rs8792556 | 45980067 | G | 0 | 0      | A |
| 23 | BICF2S23142721          | 45989697 | A | 1 | 0.6429 | G |
| 23 | BICF2P1118796           | 46002523 | G | 0 | 0      | A |
| 23 | BICF2S23639532          | 46021603 | A | 0 | 0      | G |
| 23 | BICF2S23637187          | 46025703 | A | 0 | 0.3571 | G |
| 23 | BICF2P372053            | 46036546 | A | 0 | 0      | T |
| 23 | TIGRP2P307057_rs8910102 | 46047315 | A | 0 | 0      | G |
| 23 | BICF2P660709            | 46052279 | T | 0 | 0      | A |
| 23 | TIGRP2P307067_rs9089922 | 46065851 | A | 0 | 0.3333 | G |
| 23 | BICF2P236658            | 46073138 | A | 0 | 0.3571 | T |
| 23 | BICF2P794044            | 46082031 | A | 0 | 0.4167 | T |
| 23 | BICF2S2368377           | 46096194 | 0 | 0 | 0      | G |
| 23 | BICF2P476182            | 46105898 | A | 0 | 0      | G |
| 23 | BICF2P1151536           | 46118124 | C | 0 | 0      | G |
| 23 | BICF2S22929711          | 46135144 | A | 0 | 0      | C |
| 23 | TIGRP2P307090_rs8712144 | 46139339 | G | 1 | 1      | A |
| 23 | BICF2S23313393          | 46151325 | G | 0 | 0.3333 | A |
| 23 | BICF2S23253302          | 46165566 | 0 | 0 | 0      | C |
| 23 | BICF2P618985            | 46177388 | A | 1 | 0.6429 | G |
| 23 | BICF2P618987            | 46177626 | A | 1 | 0.6429 | G |
| 23 | BICF2P1060408           | 46184418 | A | 1 | 0.6667 | G |
| 23 | BICF2P777876            | 46195779 | 0 | 0 | 0      | A |
| 23 | TIGRP2P307109_rs9060238 | 46215812 | T | 1 | 0.6429 | A |
| 23 | TIGRP2P307110_rs9107060 | 46227179 | G | 0 | 0      | A |
| 23 | BICF2P216801            | 46230570 | G | 0 | 0.6429 | A |
| 23 | BICF2P925876            | 46242346 | G | 1 | 1      | A |
| 23 | BICF2P478327            | 46263393 | A | 1 | 0.7143 | G |
| 23 | BICF2P1184255           | 46267271 | A | 0 | 0.3571 | G |
| 23 | BICF2P1141271           | 46276920 | A | 1 | 0.6429 | G |
| 23 | BICF2S23752895          | 46292490 | A | 1 | 1      | G |
| 23 | TIGRP2P307119_rs9222542 | 46301398 | A | 1 | 1      | G |
| 23 | BICF2P407362            | 46312081 | G | 1 | 1      | A |
| 23 | BICF2P571541            | 46323066 | A | 0 | 0      | G |
| 23 | BICF2P363035            | 46344873 | G | 0 | 0.25   | A |
| 23 | BICF2P263640            | 46351213 | 0 | 0 | 0      | A |
| 23 | BICF2P643442            | 46361717 | G | 0 | 0      | A |
| 23 | TIGRP2P307153_rs8883433 | 46371883 | A | 0 | 0      | G |

|    |                         |          |   |   |        |   |
|----|-------------------------|----------|---|---|--------|---|
| 23 | BICF2P1350811           | 46380108 | A | 0 | 0      | G |
| 23 | BICF2P245068            | 46397970 | G | 0 | 0      | A |
| 23 | TIGRP2P307171_rs9077745 | 46407220 | C | 0 | 0      | A |
| 23 | TIGRP2P307174_rs8908101 | 46416192 | G | 0 | 0      | A |
| 23 | BICF2P168434            | 46435045 | A | 0 | 0.2857 | G |
| 23 | BICF2P99739             | 46436890 | A | 0 | 0.25   | G |
| 23 | BICF2P1159996           | 46448289 | A | 0 | 0      | G |
| 23 | TIGRP2P307184_rs8772492 | 46459124 | A | 0 | 0      | G |
| 23 | BICF2P667239            | 46460740 | 0 | 0 | 0      | G |
| 23 | TIGRP2P307192_rs8620518 | 46482575 | G | 1 | 0.7143 | A |
| 23 | TIGRP2P307202_rs8620521 | 46484481 | A | 1 | 1      | G |
| 23 | TIGRP2P307204_rs8588204 | 46500912 | A | 0 | 0      | G |
| 23 | BICF2S23226074          | 46506799 | G | 0 | 0      | A |
| 23 | BICF2P814118            | 46521647 | A | 0 | 0.2857 | G |
| 23 | BICF2P1096141           | 46529481 | A | 0 | 0.2857 | T |
| 23 | BICF2S22961722          | 46551622 | C | 1 | 0.7143 | A |
| 23 | BICF2G630370610         | 46555648 | A | 0 | 0      | G |
| 23 | BICF2G630370599         | 46569344 | A | 0 | 0      | G |
| 23 | BICF2G630370588         | 46575593 | A | 0 | 0      | G |
| 23 | BICF2P880848            | 46599779 | G | 0 | 0      | A |
| 23 | BICF2G630370574         | 46603429 | G | 0 | 0      | A |
| 23 | BICF2P530457            | 46608013 | C | 0 | 0      | A |
| 23 | BICF2G630370562         | 46618472 | 0 | 0 | 0      | C |
| 23 | BICF2G630370541         | 46637809 | A | 0 | 0      | G |
| 23 | BICF2S23729371          | 46655383 | A | 0 | 0      | G |
| 23 | BICF2P216684            | 46660574 | A | 0 | 0      | G |
| 23 | BICF2P1017382           | 46669887 | C | 1 | 0.875  | A |
| 23 | BICF2P1010858           | 46680039 | C | 1 | 0.7143 | A |
| 23 | BICF2G630370504         | 46680139 | C | 1 | 0.7143 | A |
| 23 | BICF2G630370495         | 46684290 | A | 0 | 0      | G |
| 23 | BICF2G630370467         | 46699627 | G | 0 | 0      | A |
| 23 | BICF2G630370464         | 46704897 | 0 | 0 | 0      | G |
| 23 | BICF2G630370461         | 46708592 | G | 0 | 0      | A |
| 23 | BICF2G630370450         | 46718430 | G | 1 | 1      | A |
| 23 | BICF2G630370434         | 46737407 | A | 0 | 0.2857 | G |
| 23 | BICF2P345228            | 46750085 | G | 0 | 0.2857 | C |
| 23 | BICF2G630370410         | 46760489 | G | 1 | 0.6429 | A |
| 23 | BICF2G630370400         | 46770676 | A | 0 | 0      | G |
| 23 | BICF2G630370379         | 46782945 | G | 0 | 0      | A |
| 23 | BICF2G630370345         | 46794786 | A | 1 | 0.3571 | G |
| 23 | BICF2G630370314         | 46811249 | A | 1 | 0.3571 | C |
| 23 | BICF2P1084660           | 46817532 | A | 0 | 0.3571 | G |
| 23 | BICF2G630370301         | 46832847 | A | 0 | 0.6429 | G |
| 23 | BICF2G630370287         | 46846324 | T | 0 | 0.3571 | A |
| 23 | BICF2G630370272         | 46854309 | A | 0 | 0      | C |
| 23 | TIGRP2P307308_rs8872921 | 46860127 | A | 0 | 0      | G |
| 23 | BICF2P845063            | 46860363 | A | 0 | 0.2857 | G |

|    |                         |          |   |     |        |   |
|----|-------------------------|----------|---|-----|--------|---|
| 23 | BICF2P979396            | 46867018 | G | 0   | 0.3571 | A |
| 23 | BICF2P265682            | 46883176 | C | 0   | 0.2857 | G |
| 23 | TIGRP2P307323_rs8969253 | 46887206 | G | 0   | 0      | A |
| 23 | BICF2G630370219         | 46898503 | A | 0   | 0.2857 | G |
| 23 | BICF2G630370182         | 46917180 | 0 | 0   | 0      | C |
| 23 | BICF2G630370173         | 46933155 | C | 0   | 0      | A |
| 23 | BICF2G630370167         | 46949081 | G | 0   | 0      | A |
| 23 | BICF2P501438            | 46955227 | A | 0   | 0      | G |
| 23 | BICF2G630370158         | 46969773 | G | 0   | 0.6429 | A |
| 23 | BICF2G630370141         | 46991470 | T | 0   | 0.2857 | A |
| 23 | BICF2P1012882           | 47002370 | G | 0   | 0.2857 | A |
| 23 | BICF2G630370109         | 47012292 | G | 0   | 0.2857 | A |
| 23 | BICF2P687152            | 47037449 | 0 | 0   | 0      | A |
| 23 | BICF2G630370062         | 47062928 | A | 0   | 0.6429 | G |
| 23 | TIGRP2P307344_rs9194023 | 47073016 | G | 0   | 0      | A |
| 23 | BICF2P842856            | 47083471 | A | 1   | 0.3571 | G |
| 23 | BICF2G630370005         | 47097832 | A | 1   | 0.3571 | G |
| 23 | BICF2G630369976         | 47113536 | G | 0   | 0      | A |
| 23 | BICF2S23658901          | 47116723 | A | 0   | 0      | G |
| 23 | BICF2P1269165           | 47127833 | A | 0   | 0      | G |
| 23 | BICF2G630369929         | 47141299 | G | 0   | 0      | A |
| 23 | BICF2G630369896         | 47153488 | A | 0   | 0      | G |
| 23 | BICF2P139911            | 47166698 | A | 0   | 0      | C |
| 23 | BICF2G630369855         | 47183293 | A | 1   | 1      | G |
| 23 | BICF2G630369849         | 47185924 | G | 1   | 1      | A |
| 23 | BICF2G630369801         | 47204258 | A | 0   | 0      | C |
| 23 | BICF2G630369796         | 47208202 | A | 1   | 1      | G |
| 23 | BICF2G630369784         | 47223464 | G | 0   | 0      | A |
| 23 | BICF2G630369759         | 47242852 | A | 0.5 | 0.5714 | G |
| 23 | BICF2G630369721         | 47254042 | A | 0.5 | 0.5714 | G |
| 23 | BICF2G630369705         | 47273708 | A | 0.5 | 0.2143 | C |
| 23 | BICF2G630369686         | 47277667 | A | 0   | 0      | G |
| 23 | BICF2G630369647         | 47293145 | A | 0.5 | 0.2143 | C |
| 23 | BICF2G630369637         | 47302034 | A | 0   | 0.3571 | T |
| 23 | BICF2G630369587         | 47322617 | A | 0.5 | 0.4286 | C |
| 23 | BICF2P954976            | 47340570 | A | 0   | 0      | G |
| 23 | BICF2P79345             | 47350401 | A | 0   | 0.3571 | G |
| 23 | BICF2G630369576         | 47362337 | A | 0   | 0      | G |
| 23 | BICF2P87666             | 47364324 | A | 0   | 0      | G |
| 23 | BICF2G630369570         | 47364401 | A | 1   | 0.6429 | G |
| 23 | BICF2G630369564         | 47368856 | A | 0   | 0      | G |
| 23 | BICF2S23127709          | 47380092 | C | 0   | 0.3571 | A |
| 23 | BICF2G630369535         | 47392402 | A | 0   | 0      | G |
| 23 | TIGRP2P307480_rs8848213 | 47411922 | A | 0   | 0      | G |
| 23 | BICF2P748632            | 47419076 | G | 0   | 0.3571 | A |
| 23 | BICF2G630369530         | 47432789 | A | 0   | 0.3    | G |
| 23 | BICF2G630369528         | 47441187 | 0 | 0   | 0      | G |

|    |                         |          |   |     |        |   |
|----|-------------------------|----------|---|-----|--------|---|
| 23 | BICF2P1165968           | 47460406 | G | 1   | 1      | A |
| 23 | BICF2P702275            | 47462263 | G | 1   | 0.6667 | A |
| 23 | BICF2G630369505         | 47473867 | A | 0.5 | 0.2143 | G |
| 23 | BICF2G630369496         | 47484170 | A | 0   | 0      | G |
| 23 | BICF2G630369475         | 47503632 | A | 0.5 | 0.2143 | C |
| 23 | BICF2G630369461         | 47513535 | G | 0.5 | 0.2143 | A |
| 23 | BICF2G630369445         | 47522653 | T | 0   | 0      | A |
| 23 | BICF2G630369429         | 47531834 | A | 0   | 0      | C |
| 23 | BICF2G630369421         | 47541035 | A | 0   | 0      | G |
| 23 | BICF2G630369413         | 47559491 | A | 0.5 | 0.4286 | G |
| 23 | BICF2G630369412         | 47564841 | G | 0.5 | 0.4167 | A |
| 23 | BICF2G630369391         | 47586304 | A | 0.5 | 0.4286 | G |
| 23 | BICF2G630369389         | 47587863 | G | 0.5 | 0.4286 | A |
| 23 | BICF2G630369342         | 47608721 | C | 0   | 0      | A |
| 23 | BICF2G630369337         | 47610468 | G | 0.5 | 0.4286 | C |
| 23 | BICF2S23624203          | 47621795 | G | 0   | 0      | A |
| 23 | BICF2G630369306         | 47652558 | C | 0   | 0      | A |
| 23 | BICF2S23316034          | 47671448 | C | 0   | 0      | A |
| 23 | BICF2P1368171           | 47679867 | G | 0   | 0.3571 | A |
| 23 | BICF2P1414717           | 47693258 | C | 0   | 0      | A |
| 23 | BICF2P112904            | 47723304 | A | 0.5 | 0.5714 | T |
| 23 | BICF2G630369276         | 47735039 | G | 0.5 | 0.4286 | A |
| 23 | BICF2G630369270         | 47738614 | A | 0   | 0      | G |
| 23 | BICF2P310786            | 47754408 | A | 1   | 0.6429 | G |
| 23 | BICF2P764638            | 47765267 | A | 0   | 0      | G |
| 23 | BICF2G630369241         | 47775250 | A | 0   | 0      | C |
| 23 | BICF2P965904            | 47793691 | A | 0   | 0      | G |
| 23 | BICF2P965901            | 47794264 | C | 1   | 0.6429 | A |
| 23 | BICF2P1145357           | 47813050 | A | 0   | 0      | G |
| 23 | BICF2G630369237         | 47817227 | A | 0   | 0      | G |
| 23 | BICF2S2414806           | 47832080 | G | 0   | 0      | C |
| 23 | BICF2P59542             | 47842817 | A | 0   | 0      | G |
| 23 | BICF2S22940519          | 47853378 | G | 0.5 | 0.7857 | A |
| 23 | BICF2S234828            | 47865802 | A | 0   | 0      | G |
| 23 | BICF2S23534804          | 47890973 | A | 0   | 0      | G |
| 23 | BICF2S23120721          | 47899936 | 0 | 0   | 0      | G |
| 23 | BICF2P778798            | 47913781 | A | 0   | 0.3571 | G |
| 23 | TIGRP2P307585_rs9085211 | 47930758 | A | 0.5 | 0.7857 | G |
| 23 | BICF2S23632001          | 47939317 | G | 0.5 | 0.7857 | A |
| 23 | TIGRP2P307589_rs8711121 | 47944291 | A | 0   | 0      | G |
| 23 | BICF2G630369203         | 47965202 | G | 0.5 | 0.4286 | A |
| 23 | BICF2P1380846           | 47970997 | A | 1   | 0.6429 | C |
| 23 | BICF2G630369188         | 47978082 | 0 | 0   | 0      | G |
| 23 | BICF2G630369149         | 47989505 | G | 0.5 | 0.2143 | C |
| 23 | BICF2G630369145         | 47992703 | A | 0   | 0      | G |
| 23 | BICF2P141814            | 48010776 | C | 0.5 | 0.5714 | A |
| 23 | BICF2P54083             | 48016569 | A | 0.5 | 0.5714 | G |

|    |                         |          |   |     |        |   |
|----|-------------------------|----------|---|-----|--------|---|
| 23 | BICF2S23244970          | 48030816 | A | 0   | 0      | G |
| 23 | BICF2G630369046         | 48057984 | A | 0   | 0.3571 | G |
| 23 | TIGRP2P307626_rs8759361 | 48060042 | A | 0   | 0.3571 | G |
| 23 | BICF2G630369012         | 48075496 | G | 0   | 0      | A |
| 23 | BICF2G630369003         | 48082370 | A | 0.5 | 0.7857 | C |
| 23 | BICF2P940696            | 48093129 | A | 0   | 0      | G |
| 23 | BICF2G630368947         | 48111894 | G | 0   | 0      | A |
| 23 | BICF2G630368934         | 48122069 | G | 0.5 | 0.4286 | A |
| 23 | BICF2G630368927         | 48137797 | A | 0   | 0      | G |
| 23 | BICF2G630368924         | 48139262 | A | 0.5 | 0.2143 | C |
| 23 | BICF2P446849            | 48152665 | G | 0   | 0.3571 | A |
| 23 | BICF2G630368919         | 48167116 | A | 0.5 | 0.2143 | G |
| 23 | BICF2G630368917         | 48177763 | G | 0.5 | 0.2143 | A |
| 23 | BICF2S23436260          | 48194616 | 0 | 0   | 0      | A |
| 23 | BICF2G630368909         | 48203044 | A | 1   | 0.6429 | T |
| 23 | BICF2G630368897         | 48208587 | A | 0.5 | 0.2143 | C |
| 23 | BICF2G630368878         | 48226501 | A | 0   | 0      | G |
| 23 | BICF2G630368865         | 48232338 | A | 0   | 0      | G |
| 23 | BICF2G630368816         | 48254461 | A | 0.5 | 0.5714 | G |
| 23 | BICF2G630368814         | 48270922 | A | 0   | 0      | G |
| 23 | BICF2G630368796         | 48292292 | A | 0   | 0.3571 | C |
| 23 | BICF2G630368770         | 48304297 | G | 0.5 | 0.5714 | A |
| 23 | BICF2P22816             | 48318176 | C | 0   | 0      | G |
| 23 | TIGRP2P307687_rs8960982 | 48326776 | A | 0.5 | 0.2143 | C |
| 23 | BICF2G630368753         | 48337389 | A | 0.5 | 0.2143 | G |
| 23 | BICF2G630368719         | 48352352 | A | 0   | 0      | G |
| 23 | BICF2G630368706         | 48364555 | G | 0   | 0.3571 | C |
| 23 | BICF2G630368692         | 48375856 | G | 0   | 0.3571 | A |
| 23 | BICF2P681676            | 48382548 | A | 0   | 0.3571 | G |
| 23 | BICF2G630368670         | 48395481 | A | 0.5 | 0.4286 | G |
| 23 | BICF2G630368663         | 48407356 | A | 0.5 | 0.4286 | G |
| 23 | BICF2G630368620         | 48419900 | G | 0.5 | 0.5714 | A |
| 23 | BICF2G630368619         | 48419988 | A | 0   | 0      | G |
| 23 | BICF2P481544            | 48424020 | G | 0   | 0      | A |
| 23 | BICF2G630368609         | 48426569 | A | 0.5 | 0.5714 | G |
| 23 | BICF2S23528797          | 48443754 | A | 0   | 0      | G |
| 23 | BICF2P1406490           | 48452335 | G | 0.5 | 0.4286 | A |
| 23 | BICF2P1037125           | 48459495 | A | 0.5 | 0.4286 | G |
| 23 | BICF2G630368566         | 48467993 | C | 0   | 0      | A |
| 23 | BICF2P721069            | 48475710 | A | 0   | 0      | G |
| 23 | BICF2P1293175           | 48485073 | A | 0   | 0      | G |
| 23 | BICF2S23258608          | 48513125 | A | 0   | 0      | C |
| 23 | BICF2G630368483         | 48524591 | A | 0.5 | 0.5833 | G |
| 23 | BICF2G630368465         | 48537156 | A | 0   | 0      | G |
| 23 | BICF2G630368455         | 48544546 | A | 0   | 0      | G |
| 23 | BICF2S2294860           | 48563627 | A | 0.5 | 0.5714 | G |
| 23 | BICF2G630368382         | 48572991 | G | 0   | 0      | A |

|    |                         |          |   |     |        |   |
|----|-------------------------|----------|---|-----|--------|---|
| 23 | BICF2G630368377         | 48578241 | A | 0   | 0      | G |
| 23 | BICF2P1266274           | 48596400 | A | 0   | 0      | G |
| 23 | BICF2G630368343         | 48603280 | A | 0   | 0      | G |
| 23 | BICF2G630368329         | 48612576 | C | 0   | 0.3571 | A |
| 23 | BICF2G630368304         | 48625353 | G | 0   | 0      | A |
| 23 | BICF2P340979            | 48643601 | C | 0   | 0      | A |
| 23 | BICF2P448024            | 48645606 | A | 0   | 0      | G |
| 23 | BICF2G630368266         | 48665887 | A | 0.5 | 0.2143 | C |
| 23 | BICF2G630368264         | 48687576 | G | 0   | 0      | A |
| 23 | BICF2G630368262         | 48693729 | G | 0.5 | 0.4286 | A |
| 23 | BICF2G630368253         | 48697370 | A | 0   | 0      | T |
| 23 | BICF2S23736977          | 48705218 | A | 0.5 | 0.5714 | G |
| 23 | BICF2G630368222         | 48714324 | G | 0   | 0      | C |
| 23 | BICF2G630368213         | 48734292 | A | 1   | 0.6429 | G |
| 23 | BICF2G630368209         | 48737532 | G | 1   | 0.6429 | A |
| 23 | BICF2G630368194         | 48755369 | G | 1   | 0.6429 | A |
| 23 | BICF2G630368174         | 48769952 | A | 0.5 | 0.4286 | G |
| 23 | BICF2G630368171         | 48771962 | G | 0.5 | 0.5714 | A |
| 23 | BICF2P799322            | 48778821 | G | 0.5 | 0.2143 | A |
| 23 | BICF2P235501            | 48783081 | A | 1   | 0.6429 | C |
| 23 | BICF2G630368157         | 48804470 | A | 0   | 0      | G |
| 23 | BICF2G630368137         | 48815132 | A | 1   | 0.6429 | G |
| 23 | BICF2G630368132         | 48817567 | A | 0   | 0      | G |
| 23 | BICF2S23441149          | 48839840 | G | 0   | 0      | C |
| 23 | BICF2S23441791          | 48842315 | G | 0   | 0      | A |
| 23 | BICF2G630368054         | 48852208 | A | 1   | 0.6429 | G |
| 23 | BICF2G630368026         | 48865622 | G | 1   | 0.6429 | A |
| 23 | BICF2G630368021         | 48875181 | A | 1   | 0.6429 | G |
| 23 | BICF2G630368003         | 48890076 | G | 1   | 0.6429 | A |
| 23 | BICF2G630367975         | 48903176 | A | 1   | 0.6429 | G |
| 23 | BICF2S23356422          | 48919581 | G | 0   | 0      | A |
| 23 | BICF2P938248            | 48927814 | A | 0   | 0      | G |
| 23 | BICF2S23350290          | 48947354 | C | 0   | 0.3571 | A |
| 23 | BICF2S23350289          | 48947494 | G | 0   | 0.3571 | A |
| 23 | BICF2G630367907         | 48957196 | G | 0   | 0      | A |
| 23 | BICF2G630367898         | 48969187 | 0 | 0   | 0      | G |
| 23 | BICF2G630367896         | 48984492 | 0 | 0   | 0      | A |
| 23 | BICF2P1160763           | 48993172 | G | 0.5 | 0.2143 | A |
| 23 | BICF2P514995            | 49005158 | T | 0.5 | 0.3    | A |
| 23 | BICF2P481183            | 49014550 | G | 0.5 | 0.7857 | A |
| 23 | BICF2S23454485          | 49025645 | A | 0   | 0      | G |
| 23 | BICF2G630367861         | 49053291 | A | 0   | 0      | C |
| 23 | BICF2G630367843         | 49063059 | A | 0   | 0      | G |
| 23 | BICF2G630367822         | 49095313 | A | 0   | 0.3333 | G |
| 23 | BICF2G630367804         | 49111091 | A | 0.5 | 0.4286 | C |
| 23 | TIGRP2P307862_rs8689845 | 49118380 | A | 0.5 | 0.2143 | G |
| 23 | BICF2G630367797         | 49129024 | A | 0.5 | 0.7857 | C |

|    |                         |          |   |     |        |   |
|----|-------------------------|----------|---|-----|--------|---|
| 23 | BICF2S2315219           | 49143324 | G | 0   | 0.3571 | A |
| 23 | BICF2P174576            | 49158790 | G | 0   | 0      | A |
| 23 | BICF2S23123230          | 49170243 | A | 0.5 | 0.4286 | G |
| 23 | TIGRP2P307885_rs9178379 | 49185307 | 0 | 0   | 0      | A |
| 23 | BICF2G630367753         | 49186028 | A | 0   | 0      | G |
| 23 | BICF2P773014            | 49207182 | C | 0.5 | 0.7857 | A |
| 23 | BICF2S23429291          | 49213260 | 0 | 0   | 0      | A |
| 23 | BICF2G630367713         | 49232153 | G | 0.5 | 0.7857 | A |
| 23 | BICF2G630367701         | 49244801 | A | 0   | 0      | G |
| 23 | TIGRP2P307912_rs9078818 | 49255395 | A | 0   | 0      | G |
| 23 | TIGRP2P307924_rs8722154 | 49269240 | 0 | 0   | 0      | G |
| 23 | BICF2S23517161          | 49287199 | G | 0   | 0      | A |
| 23 | BICF2P586274            | 49294377 | G | 0   | 0      | A |
| 23 | BICF2P385011            | 49296372 | C | 1   | 0.6429 | A |
| 23 | BICF2G630367648         | 49307747 | A | 0   | 0      | C |
| 23 | BICF2G630367632         | 49315009 | G | 0   | 0      | A |
| 23 | TIGRP2P307937_rs9187921 | 49324609 | 0 | 0   | 0      | G |
| 23 | BICF2P711262            | 49342618 | 0 | 0   | 0      | A |
| 23 | BICF2P723023            | 49355268 | A | 0.5 | 0.4286 | G |
| 23 | BICF2P834364            | 49361955 | G | 0.5 | 0.2143 | A |
| 23 | BICF2G630367598         | 49380644 | A | 0.5 | 0.2143 | C |
| 23 | BICF2G630367589         | 49389162 | G | 0.5 | 0.4286 | A |
| 23 | BICF2G630367577         | 49393154 | G | 0.5 | 0.7857 | A |
| 23 | BICF2P409762            | 49407851 | A | 0   | 0      | G |
| 23 | BICF2P200221            | 49421747 | G | 0   | 0      | A |
| 23 | BICF2S23126158          | 49432146 | T | 0   | 0      | A |
| 23 | BICF2P864762            | 49438880 | A | 0   | 0      | G |
| 23 | BICF2P297568            | 49458506 | G | 0   | 0      | A |
| 23 | BICF2P580549            | 49471629 | G | 0.5 | 0.2143 | A |
| 23 | TIGRP2P308005_rs8939852 | 49481188 | T | 0   | 0.3571 | A |
| 23 | BICF2P26740             | 49489335 | A | 1   | 0.6429 | C |
| 23 | BICF2S23013600          | 49506030 | G | 0   | 0      | A |
| 23 | TIGRP2P308025_rs9136853 | 49512635 | A | 0   | 0      | C |
| 23 | BICF2G630367562         | 49512825 | G | 0   | 0.3571 | A |
| 23 | BICF2G630367555         | 49519101 | G | 0.5 | 0.5714 | A |
| 23 | TIGRP2P308028_rs9106822 | 49540407 | A | 0   | 0      | G |
| 23 | BICF2G630367528         | 49549605 | G | 1   | 1      | A |
| 23 | BICF2G630367493         | 49555949 | A | 1   | 1      | G |
| 23 | BICF2G630367448         | 49570589 | A | 1   | 0.6429 | G |
| 23 | BICF2G630367439         | 49577051 | C | 0   | 0      | A |
| 23 | BICF2S23411957          | 49594860 | A | 0.5 | 0.2143 | G |
| 23 | BICF2G630367403         | 49603786 | G | 0   | 0      | A |
| 23 | BICF2G630367395         | 49611123 | C | 0.5 | 0.2143 | A |
| 23 | BICF2G630367368         | 49628674 | A | 0   | 0      | G |
| 23 | BICF2G630367359         | 49637536 | A | 0.5 | 0.7857 | G |
| 23 | BICF2P1438070           | 49645792 | A | 0.5 | 0.1667 | G |
| 23 | BICF2G630367335         | 49665942 | A | 1   | 1      | G |

|    |                         |          |   |      |        |   |
|----|-------------------------|----------|---|------|--------|---|
| 23 | BICF2G630367328         | 49670588 | G | 0.5  | 0.5714 | A |
| 23 | BICF2G630367305         | 49681971 | A | 0    | 0      | G |
| 23 | BICF2G630367294         | 49695977 | A | 0    | 0      | G |
| 23 | BICF2G630367281         | 49704787 | A | 0    | 0.3571 | G |
| 23 | BICF2G630367263         | 49715517 | A | 0    | 0      | G |
| 23 | BICF2G630367248         | 49727243 | A | 0    | 0      | G |
| 23 | BICF2G630367236         | 49737605 | G | 0.5  | 0.2143 | A |
| 23 | BICF2G630367220         | 49753556 | A | 0    | 0      | G |
| 23 | BICF2G630367203         | 49761364 | G | 0.5  | 0.4286 | A |
| 23 | BICF2G630367177         | 49772883 | C | 0.5  | 0.4286 | A |
| 23 | BICF2G630367156         | 49792616 | G | 0    | 0      | A |
| 23 | BICF2G630367140         | 49799087 | C | 1    | 1      | G |
| 23 | BICF2G630367117         | 49814077 | A | 0    | 0.3571 | G |
| 23 | TIGRP2P308081_rs9171813 | 49825788 | A | 0.5  | 0.4286 | G |
| 23 | BICF2G630367098         | 49837566 | A | 0.5  | 0.375  | G |
| 23 | BICF2G630367095         | 49844062 | G | 0    | 0      | A |
| 23 | BICF2G630367092         | 49854209 | G | 0.75 | 0.6429 | A |
| 23 | TIGRP2P308095_rs8565908 | 49881109 | G | 0.5  | 0.1667 | A |
| 23 | BICF2P1032775           | 49895493 | A | 1    | 1      | G |
| 23 | BICF2G630367057         | 49912437 | A | 0.25 | 0.4286 | G |
| 23 | BICF2G630367041         | 49928241 | A | 0.75 | 0.6429 | C |
| 23 | BICF2P619524            | 49943371 | A | 0.5  | 0.2143 | C |
| 23 | BICF2G630367001         | 49952191 | A | 0    | 0      | G |
| 23 | BICF2G630366996         | 49956803 | G | 0    | 0      | A |
| 23 | BICF2G630366983         | 49971623 | G | 0.5  | 0.1    | A |
| 23 | BICF2P608706            | 49973951 | T | 0.5  | 0.2143 | A |
| 23 | BICF2P759542            | 49989477 | 0 | 0    | 0      | A |
| 23 | BICF2P752688            | 49994508 | A | 0.5  | 0.8333 | G |
| 23 | BICF2G630366968         | 50013413 | A | 0.5  | 0.2143 | C |
| 23 | BICF2S2352581           | 50013584 | A | 0.25 | 0.3571 | G |
| 23 | BICF2G630366967         | 50014149 | A | 0.5  | 0.2143 | G |
| 23 | BICF2P1259212           | 50029529 | C | 1    | 1      | A |
| 23 | BICF2G630366943         | 50040662 | A | 1    | 1      | G |
| 23 | BICF2P57284             | 50049111 | A | 0.25 | 0.3571 | G |
| 23 | BICF2P1100506           | 50061738 | A | 0.25 | 0.4286 | G |
| 23 | BICF2S23118727          | 50062261 | T | 0.25 | 0.4286 | A |
| 23 | BICF2G630366917         | 50079463 | G | 0    | 0      | A |
| 23 | BICF2P272658            | 50085005 | A | 0    | 0      | G |
| 23 | BICF2P365524            | 50103101 | G | 0    | 0      | A |
| 23 | TIGRP2P308147_rs9028125 | 50107206 | G | 0    | 0      | A |
| 23 | BICF2G630366835         | 50119273 | G | 0    | 0      | A |
| 23 | BICF2P141769            | 50135703 | G | 0    | 0      | A |
| 23 | BICF2P1459395           | 50147692 | G | 1    | 1      | A |
| 23 | BICF2S22914829          | 50154283 | A | 0    | 0      | G |
| 23 | BICF2P1026855           | 50172563 | A | 1    | 1      | G |
| 23 | BICF2G630366792         | 50183553 | A | 0    | 0      | C |
| 23 | BICF2G630366786         | 50195911 | A | 0.25 | 0.4286 | G |



|    |                         |          |   |      |        |   |
|----|-------------------------|----------|---|------|--------|---|
| 23 | TIGRP2P308173_rs8567260 | 50199189 | 0 | 0    | 0      | A |
| 23 | BICF2G630366768         | 50220263 | A | 0    | 0      | C |
| 23 | BICF2G630366766         | 50221608 | A | 0    | 0      | C |
| 23 | BICF2P147477            | 50236347 | A | 0.25 | 0.3571 | G |
| 23 | BICF2G630366751         | 50244122 | A | 0.5  | 0.2143 | G |
| 23 | BICF2G630366729         | 50259525 | G | 0.5  | 0.2143 | A |
| 23 | BICF2G630366707         | 50267352 | G | 0.5  | 0.2143 | A |
| 23 | BICF2P978411            | 50277911 | C | 0.5  | 0.7857 | A |
| 23 | TIGRP2P308187_rs8800980 | 50278795 | 0 | 0    | 0      | A |
| 23 | BICF2P135171            | 50291215 | G | 0    | 0      | A |
| 23 | BICF2S2337990           | 50305889 | G | 0.5  | 0.2143 | A |
| 23 | BICF2P269527            | 50313382 | 0 | 0    | 0      | A |
| 23 | BICF2G630366694         | 50325752 | G | 0    | 0      | A |
| 23 | BICF2G630366681         | 50336020 | G | 0    | 0      | A |
| 23 | BICF2S22942834          | 50352993 | C | 0    | 0      | A |
| 23 | BICF2G630366657         | 50363999 | A | 0.25 | 0.4286 | G |
| 23 | BICF2P222970            | 50378077 | G | 0.5  | 0.2143 | A |
| 23 | TIGRP2P308232_rs8868841 | 50389761 | G | 0.25 | 0.3571 | A |
| 23 | BICF2P1407777           | 50403976 | C | 0    | 0      | A |
| 23 | BICF2S2419112           | 50410836 | G | 0    | 0      | A |
| 23 | BICF2G630366602         | 50427535 | G | 0    | 0      | A |
| 23 | BICF2G630366583         | 50449475 | A | 0.5  | 0.2143 | G |
| 23 | BICF2G630366574         | 50450561 | C | 0.5  | 0.2143 | A |
| 23 | BICF2G630366534         | 50462296 | G | 0    | 0      | A |
| 23 | BICF2G630366485         | 50473897 | G | 0.75 | 0.6429 | A |
| 23 | BICF2G630366450         | 50486546 | A | 0    | 0      | G |
| 23 | BICF2G630366448         | 50500986 | G | 0.5  | 0.7857 | A |
| 23 | BICF2G630366432         | 50515752 | G | 0.75 | 0.5714 | A |
| 23 | BICF2P441504            | 50519822 | G | 1    | 1      | A |
| 23 | BICF2G630366412         | 50533260 | G | 0    | 0      | A |
| 23 | BICF2G630366387         | 50543554 | G | 1    | 1      | A |
| 23 | BICF2G630366365         | 50565107 | G | 0.75 | 0.5714 | A |
| 23 | BICF2G630366364         | 50566327 | G | 0.25 | 0.3571 | A |
| 23 | BICF2G630366353         | 50581413 | A | 0.5  | 0.2143 | C |
| 23 | BICF2G630366315         | 50597686 | T | 0.25 | 0.3571 | A |
| 23 | BICF2S23437169          | 50607303 | A | 0    | 0      | G |
| 23 | BICF2G630366308         | 50619013 | G | 0.5  | 0.2143 | A |
| 23 | BICF2G630366293         | 50630335 | G | 0.75 | 0.6429 | A |
| 23 | BICF2P27212             | 50635945 | C | 1    | 1      | A |
| 23 | BICF2G630366263         | 50651255 | A | 0.25 | 0.3571 | C |
| 23 | BICF2S2432347           | 50658125 | A | 0.25 | 0.3333 | T |
| 23 | BICF2G630366230         | 50670359 | G | 0    | 0      | A |
| 23 | BICF2G630366210         | 50682573 | A | 0    | 0      | G |
| 23 | BICF2G630366192         | 50694258 | A | 0.25 | 0.4286 | G |
| 23 | BICF2P385332            | 50703076 | A | 1    | 0.6    | C |
| 23 | BICF2G630366184         | 50709578 | 0 | 0    | 0      | G |
| 23 | BICF2G630366179         | 50716303 | G | 0.5  | 0.2143 | A |

|    |                         |          |   |      |        |   |
|----|-------------------------|----------|---|------|--------|---|
| 23 | BICF2G630366159         | 50736132 | A | 0    | 0      | G |
| 23 | BICF2G630366151         | 50741181 | G | 0.75 | 0.5714 | A |
| 23 | BICF2P86572             | 50754333 | G | 0.25 | 0.3571 | A |
| 23 | BICF2P315173            | 50761452 | A | 1    | 1      | C |
| 23 | BICF2G630366141         | 50775522 | G | 0.25 | 0.3571 | A |
| 23 | BICF2G630366122         | 50786644 | G | 0.25 | 0.3571 | A |
| 23 | BICF2S23141605          | 50804690 | G | 0.75 | 0.6429 | A |
| 23 | BICF2P328799            | 50809591 | G | 0    | 0      | A |
| 23 | BICF2S23247916          | 50825665 | G | 0.25 | 0.3571 | A |
| 23 | BICF2G630366087         | 50831027 | 0 | 0    | 0      | G |
| 23 | BICF2G630366069         | 50847940 | A | 0    | 0      | C |
| 23 | BICF2S22938497          | 50854968 | G | 0.25 | 0.3571 | A |
| 23 | BICF2P228984            | 50872606 | A | 0.5  | 0.2143 | G |
| 23 | BICF2G630366003         | 50876026 | A | 0    | 0      | G |
| 23 | BICF2S23024254          | 50889242 | G | 0.5  | 0.3571 | A |
| 23 | TIGRP2P308355_rs8930421 | 50899021 | A | 0.5  | 0.2143 | G |
| 23 | BICF2P63246             | 50919365 | A | NA   | 1      | G |
| 23 | BICF2G630365936         | 50925411 | A | 0    | 0      | G |
| 23 | BICF2G630365914         | 50937368 | C | 0    | 0      | G |
| 23 | BICF2G630365869         | 50953900 | A | 0    | 0      | G |
| 23 | BICF2G630365859         | 50957351 | G | 0.5  | 0.3571 | A |
| 23 | BICF2S23431305          | 50974564 | 0 | 0    | 0      | G |
| 23 | BICF2P780356            | 51001456 | A | 1    | 1      | G |
| 23 | BICF2G630365844         | 51006375 | G | 0.5  | 0.3571 | A |
| 23 | BICF2G630365823         | 51019685 | G | 0    | 0      | A |
| 23 | BICF2G630365791         | 51028186 | A | 0.5  | 0.3571 | G |
| 23 | BICF2P217718            | 51044385 | 0 | 0    | 0      | A |
| 23 | BICF2P736858            | 51050800 | 0 | 0    | 0      | A |
| 23 | BICF2P1176223           | 51069751 | 0 | 0    | 0      | A |
| 23 | BICF2P985488            | 51079273 | 0 | 0    | 0      | A |
| 23 | BICF2S22959120          | 51088724 | A | 0    | 0      | G |
| 23 | BICF2S23254318          | 51098174 | G | 0.5  | 0.3571 | A |
| 23 | BICF2G630365778         | 51108850 | C | 0.5  | 0.6429 | A |
| 23 | BICF2G630365764         | 51124083 | G | 0    | 0      | A |
| 23 | BICF2G630365758         | 51132111 | A | 0    | 0      | T |
| 23 | BICF2G630365733         | 51148205 | A | 0    | 0      | G |
| 23 | BICF2G630365725         | 51155117 | A | 0    | 0      | C |
| 23 | BICF2P956409            | 51164815 | A | 0    | 0      | G |
| 23 | BICF2P563086            | 51180916 | A | 0    | 0      | C |
| 23 | BICF2S23258782          | 51187391 | A | 0.5  | 0.3571 | G |
| 23 | BICF2P1072137           | 51198536 | 0 | 0    | 0      | C |
| 23 | BICF2S23443139          | 51213058 | A | 0.5  | 0.6429 | G |
| 23 | BICF2G630365690         | 51224060 | A | 0.5  | 0.6429 | C |
| 23 | BICF2S2351426           | 51235978 | 0 | 0    | 0      | G |
| 23 | BICF2P477965            | 51244647 | G | 0.5  | 0.6429 | A |
| 23 | BICF2G630365659         | 51265780 | C | 0    | 0      | A |
| 23 | BICF2G630365657         | 51267845 | A | 0    | 0      | G |

|    |                         |          |   |     |        |   |
|----|-------------------------|----------|---|-----|--------|---|
| 23 | BICF2G630365617         | 51300681 | G | 0.5 | 0.6429 | A |
| 23 | BICF2P292653            | 51312174 | C | 0   | 0      | A |
| 23 | BICF2S22928785          | 51315445 | A | 0.5 | 0.6429 | G |
| 23 | BICF2G630365587         | 51337913 | A | 0.5 | 0.3571 | G |
| 23 | BICF2S23210844          | 51349690 | G | 1   | 0.8571 | A |
| 23 | BICF2G630365576         | 51350303 | G | 0   | 0.1429 | A |
| 23 | BICF2P389796            | 51350687 | A | 0.5 | 0.3571 | G |
| 23 | BICF2G630365522         | 51370341 | A | 0.5 | 0.5    | G |
| 23 | BICF2G630365502         | 51387076 | A | 0   | 0      | G |
| 23 | BICF2P1077737           | 51394651 | G | 0.5 | 0.5    | A |
| 23 | TIGRP2P308436_rs8987603 | 51407838 | G | 1   | 0.8571 | A |
| 23 | BICF2S23716592          | 51417373 | A | 0.5 | 0.5    | G |
| 23 | BICF2P311635            | 51429239 | A | 0.5 | 0.5    | G |
| 23 | BICF2S2377206           | 51439855 | A | 0.5 | 0.5    | G |
| 23 | BICF2G630365454         | 51452640 | G | 0   | 0      | A |
| 23 | BICF2P567319            | 51463085 | A | 0.5 | 0.5    | G |
| 23 | BICF2G630365443         | 51493827 | G | 0.5 | 0.3571 | A |
| 23 | BICF2P243022            | 51498245 | 0 | 0   | 0      | A |
| 23 | BICF2S23050564          | 51526409 | A | 1   | 0.8571 | T |
| 23 | BICF2G630365408         | 51542483 | A | 0   | 0      | C |
| 23 | BICF2G630365405         | 51543056 | A | 0   | 0      | G |
| 23 | BICF2G630365393         | 51559886 | C | 0   | 0      | A |
| 23 | BICF2P1115892           | 51567073 | A | 0   | 0      | G |
| 23 | BICF2G630365359         | 51589964 | C | 0   | 0      | A |
| 23 | BICF2G630365326         | 51607468 | G | 0   | 0      | A |
| 23 | BICF2G630365322         | 51612216 | A | 0   | 0.1429 | G |
| 23 | BICF2G630365285         | 51626593 | A | 0.5 | 0.6429 | G |
| 23 | BICF2G630365259         | 51637811 | A | 0.5 | 0.3571 | G |
| 23 | BICF2G630365256         | 51645434 | A | 0   | 0.1429 | C |
| 23 | BICF2G630365247         | 51649733 | A | 0   | 0.1429 | C |
| 23 | BICF2G630365216         | 51664187 | A | 0   | 0      | G |
| 23 | BICF2P17537             | 51669670 | G | 0   | 0      | A |
| 23 | BICF2P1040068           | 51683106 | A | 0.5 | 0.3571 | G |
| 23 | BICF2G630365198         | 51696895 | A | 0   | 0      | G |
| 23 | BICF2S22913772          | 51712758 | A | 0.5 | 0.3571 | G |
| 23 | BICF2G630365172         | 51722894 | C | 0.5 | 0.3571 | A |
| 23 | BICF2G630365162         | 51728537 | G | 0   | 0      | A |
| 23 | BICF2G630365117         | 51742193 | G | 0   | 0      | A |
| 23 | BICF2P58742             | 51768322 | G | 0   | 0.1429 | A |
| 23 | BICF2G630365042         | 51777482 | 0 | 0   | 0      | C |
| 23 | BICF2G630365011         | 51794501 | G | 0.5 | 0.5    | A |
| 23 | BICF2G630365006         | 51796454 | A | 0   | 0      | G |
| 23 | BICF2G630364992         | 51817275 | A | 0   | 0      | G |
| 23 | BICF2G630364988         | 51823539 | G | 0   | 0      | A |
| 23 | BICF2G630364982         | 51826862 | A | 1   | 0.8571 | G |
| 23 | BICF2G630364971         | 51830839 | A | 0   | 0      | G |
| 23 | BICF2G630364951         | 51845631 | A | 0.5 | 0.3571 | G |

|    |                         |          |   |     |        |   |
|----|-------------------------|----------|---|-----|--------|---|
| 23 | BICF2G630364929         | 51856910 | A | 1   | 0.8571 | C |
| 23 | BICF2G630364915         | 51866622 | C | 0   | 0.1429 | A |
| 23 | BICF2G630364886         | 51879693 | G | 0.5 | 0.5    | A |
| 23 | BICF2G630364864         | 51888031 | A | 0.5 | 0.5    | G |
| 23 | BICF2G630364841         | 51901147 | 0 | 0   | 0      | A |
| 23 | BICF2P335079            | 51911646 | C | 0.5 | 0.5    | A |
| 23 | BICF2G630364815         | 51927782 | 0 | 0   | 0      | G |
| 23 | BICF2G630364803         | 51942290 | G | 0   | 0.1429 | A |
| 23 | BICF2G630364794         | 51950029 | 0 | 0   | 0      | A |
| 23 | BICF2G630364783         | 51960279 | G | 0.5 | 0.2143 | A |
| 23 | BICF2G630364748         | 51977147 | A | 1   | 0.5714 | G |
| 23 | BICF2G630364735         | 51988096 | A | 0.5 | 0.2143 | G |
| 23 | BICF2G630364718         | 52000892 | G | 0.5 | 0.5    | A |
| 23 | BICF2G630364711         | 52006450 | G | 1   | 0.5714 | A |
| 23 | BICF2S23126394          | 52022189 | A | 0.5 | 0.3571 | G |
| 23 | BICF2G630364686         | 52025037 | C | 0   | 0.2857 | A |
| 23 | BICF2G630364674         | 52026093 | A | 0   | 0      | G |
| 23 | BICF2G630364655         | 52044761 | A | 0   | 0.2857 | G |
| 23 | BICF2G630364619         | 52063003 | A | 0.5 | 0.3571 | G |
| 23 | BICF2G630364604         | 52074189 | G | 0   | 0.1429 | A |
| 23 | BICF2G630364581         | 52084578 | C | 0   | 0.1429 | A |
| 23 | BICF2G630364572         | 52095430 | A | 0   | 0      | G |
| 23 | BICF2S23160660          | 52104345 | A | 1   | 0.8571 | G |
| 23 | BICF2S23040067          | 52117081 | C | 1   | 0.8571 | A |
| 23 | TIGRP2P308568_rs8575949 | 52120529 | A | 0   | 0.1429 | G |
| 23 | TIGRP2P308576_rs8728533 | 52131169 | G | 1   | 1      | A |
| 23 | BICF2G630364526         | 52143305 | A | 0   | 0      | G |
| 23 | BICF2G630364517         | 52145930 | A | 0   | 0.1429 | G |
| 23 | BICF2P428166            | 52153372 | A | 0   | 0      | G |
| 23 | BICF2S23020766          | 52164101 | C | 1   | 0.5714 | A |
| 23 | BICF2S23147194          | 52178154 | C | 0   | 0      | A |
| 23 | BICF2P1502986           | 52197388 | A | 0   | 0      | G |
| 23 | BICF2G630364491         | 52205724 | A | 0   | 0.4286 | C |
| 23 | BICF2G630364485         | 52212480 | G | 0   | 0.4286 | A |
| 23 | BICF2S23753202          | 52224642 | G | 0.5 | 0.3571 | A |
| 23 | BICF2G630364465         | 52233992 | G | 0   | 0      | A |
| 23 | BICF2P1436029           | 52246986 | A | 0   | 0      | G |
| 23 | BICF2P1213069           | 52263617 | 0 | 0   | 0      | A |
| 23 | BICF2G630364437         | 52267505 | G | 0.5 | 0.3571 | A |
| 23 | BICF2G630364424         | 52282389 | A | 0.5 | 0.6429 | G |
| 23 | TIGRP2P308628_rs8768171 | 52290761 | 0 | 0   | 0      | C |
| 23 | BICF2G630364393         | 52302023 | G | 0.5 | 0.3571 | A |
| 23 | BICF2G630364375         | 52313510 | C | 0.5 | 0.5    | A |
| 23 | TIGRP2P308633_rs9035933 | 52313533 | A | 0   | 0      | G |
| 23 | BICF2G630364334         | 52331949 | G | 0   | 0.1429 | A |
| 23 | BICF2P966033            | 52336855 | A | 0.5 | 0.2143 | G |
| 23 | BICF2G630364330         | 52348719 | A | 0   | 0.2857 | G |

|    |                         |          |   |     |        |   |
|----|-------------------------|----------|---|-----|--------|---|
| 23 | BICF2G630364305         | 52359598 | G | 0   | 0.2857 | A |
| 23 | BICF2G630364283         | 52375669 | G | 0   | 0      | A |
| 23 | BICF2P1010078           | 52400669 | G | 0.5 | 0.2143 | A |
| 23 | BICF2G630364276         | 52442932 | A | 0   | 0      | C |
| 23 | BICF2G630364259         | 52454062 | T | 0   | 0      | A |
| 23 | BICF2G630364248         | 52466784 | A | 0.5 | 0.6429 | G |
| 23 | BICF2P1262546           | 52476288 | G | 0   | 0      | A |
| 23 | BICF2P596722            | 52486953 | 0 | 0   | 0      | A |
| 23 | BICF2P1180636           | 52505047 | A | 0   | 0      | G |
| 23 | BICF2P913452            | 52511363 | G | 0   | 0      | C |
| 23 | BICF2G630364231         | 52530782 | C | 0   | 0      | G |
| 23 | BICF2G630364204         | 52544977 | A | 0.5 | 0.3571 | G |
| 23 | BICF2G630364180         | 52557522 | G | 0   | 0      | A |
| 23 | BICF2G630364164         | 52574549 | A | 0.5 | 0.3571 | G |
| 23 | BICF2G630364152         | 52581061 | G | 0.5 | 0.3571 | A |
| 23 | BICF2G630364132         | 52597465 | C | 0.5 | 0.3571 | A |
| 23 | BICF2G630364122         | 52607541 | C | 0.5 | 0.5    | A |
| 23 | BICF2G630364116         | 52612666 | G | 0.5 | 0.3571 | A |
| 23 | BICF2G630364072         | 52633554 | A | 0   | 0.1429 | G |
| 23 | BICF2G630364067         | 52635958 | A | 0   | 0      | G |
| 23 | BICF2G630364062         | 52651273 | G | 0.5 | 0.2143 | A |
| 23 | BICF2G630364055         | 52660569 | G | 0.5 | 0.3571 | A |
| 23 | BICF2G630364040         | 52686892 | 0 | 0   | 0      | T |
| 23 | BICF2G630364032         | 52711652 | A | 0   | 0.2857 | G |
| 23 | BICF2P104564            | 52718423 | G | 0   | 0.2857 | A |
| 23 | BICF2P473470            | 52733437 | G | 0   | 0.2857 | A |
| 23 | BICF2P135327            | 52749626 | G | 0   | 0      | A |
| 23 | BICF2P137631            | 52766339 | G | 1   | 0.5714 | A |
| 23 | TIGRP2P308737_rs8720126 | 52774042 | C | 0   | 0.1429 | A |
| 23 | BICF2G630363988         | 52787176 | A | 1   | 0.5714 | G |
| 23 | TIGRP2P308749_rs8804533 | 52793447 | G | 0   | 0      | A |
| 23 | BICF2G630363941         | 52802699 | A | 0   | 0.4286 | G |
| 23 | BICF2G630363913         | 52810958 | A | 0.5 | 0.2143 | G |
| 23 | BICF2G630363879         | 52830417 | A | 0   | 0      | C |
| 23 | BICF2G630363866         | 52839897 | A | 0   | 0      | G |
| 23 | BICF2P121985            | 52844544 | G | 0   | 0.2857 | A |
| 23 | BICF2G630363860         | 52859510 | 0 | 0   | 0      | G |
| 23 | BICF2P545825            | 52870330 | C | 0   | 0      | A |
| 23 | BICF2G630363815         | 52882887 | C | 0   | 0      | A |
| 23 | BICF2S23432078          | 52890270 | G | 0   | 0      | A |
| 23 | BICF2P290932            | 52901603 | A | 0   | 0      | C |
| 23 | BICF2G630363795         | 52912119 | G | 0   | 0.2857 | A |
| 23 | BICF2G630363780         | 52921470 | A | 0   | 0      | G |
| 23 | BICF2G630363768         | 52923046 | C | 0   | 0      | A |
| 23 | BICF2G630363697         | 52939583 | C | 0.5 | 0.2143 | G |
| 23 | BICF2G630363687         | 52946488 | G | 0.5 | 0.2143 | A |
| 23 | BICF2P954158            | 52968440 | A | 0   | 0      | G |

|    |                         |          |   |     |        |   |
|----|-------------------------|----------|---|-----|--------|---|
| 23 | BICF2G630363632         | 52980375 | 0 | 0   | 0      | G |
| 23 | BICF2G630363603         | 52987980 | A | 0.5 | 0.6429 | G |
| 23 | BICF2G630363601         | 52988940 | G | 0   | 0.1429 | A |
| 23 | BICF2G630363596         | 52992312 | G | 0   | 0      | A |
| 23 | BICF2P295707            | 53003526 | G | 0   | 0      | A |
| 23 | BICF2G630363579         | 53008770 | A | 0.5 | 0.7857 | G |
| 23 | BICF2G630363577         | 53008851 | A | 0.5 | 0.7857 | G |
| 23 | BICF2G630363536         | 53019979 | G | 0   | 0      | A |
| 23 | BICF2G630363517         | 53029935 | A | 0   | 0      | G |
| 23 | BICF2G630363511         | 53042533 | G | 0.5 | 0.3571 | A |
| 23 | TIGRP2P308819_rs8677801 | 53055008 | 0 | 0   | 0      | G |
| 23 | BICF2G630363503         | 53080358 | C | 0.5 | 0.2143 | A |
| 23 | TIGRP2P308824_rs9071123 | 53094120 | A | 0   | 0      | G |
| 23 | BICF2G630363500         | 53102081 | A | 0.5 | 0.2143 | C |
| 23 | BICF2S23635475          | 53114394 | 0 | 0   | 0      | G |
| 23 | BICF2G630363499         | 53149905 | T | 0   | 0      | A |
| 23 | BICF2G630363498         | 53163124 | 0 | 0   | 0      | G |
| 23 | BICF2P310870            | 53167049 | 0 | 0   | 0      | G |
| 23 | BICF2P327763            | 53176289 | 0 | 0   | 0      | G |
| 23 | BICF2P1100308           | 53195930 | 0 | 0   | 0      | G |
| 23 | BICF2G630363497         | 53204788 | A | 0   | 0.1429 | G |
| 23 | BICF2G630363495         | 53208845 | C | 0.5 | 0.5    | A |
| 23 | BICF2G630363483         | 53214137 | A | 0   | 0.1429 | G |
| 23 | BICF2S23413232          | 53273162 | A | 0   | 0.1429 | G |
| 23 | BICF2G630363476         | 53282353 | A | 0   | 0      | G |
| 23 | TIGRP2P308829_rs8983190 | 53311753 | A | 0   | 0      | G |
| 23 | BICF2G630363475         | 53319711 | 0 | 0   | 0      | G |
| 23 | BICF2P277235            | 53327498 | 0 | 0   | 0      | C |
| 23 | BICF2G630363474         | 53346135 | A | 0   | 0      | C |
| 23 | BICF2G630363471         | 53352280 | A | 0.5 | 0.3571 | G |
| 23 | BICF2P389710            | 53363981 | A | 0   | 0      | G |
| 23 | BICF2G630363464         | 53376506 | A | 0.5 | 0.2143 | C |
| 23 | BICF2S23541735          | 53376961 | A | 0   | 0      | G |
| 23 | BICF2G630363448         | 53385356 | A | 0   | 0      | G |
| 23 | BICF2G630363410         | 53394500 | A | 0   | 0      | G |
| 23 | BICF2S23715111          | 53412383 | G | 0   | 0      | A |
| 23 | BICF2G630363366         | 53426439 | A | 1   | 0.5714 | G |
| 23 | BICF2G630363364         | 53430948 | A | 0   | 0.4286 | G |
| 23 | BICF2G630363360         | 53441335 | G | 1   | 1      | A |
| 23 | BICF2G630363328         | 53458855 | A | 0   | 0      | G |
| 23 | BICF2G630363298         | 53472489 | A | 0   | 0      | G |
| 23 | TIGRP2P308865_rs8730452 | 53488561 | 0 | 0   | 0      | C |
| 23 | BICF2G630363273         | 53501722 | G | 0   | 0      | A |
| 23 | BICF2G630363230         | 53519454 | A | 0   | 0      | G |
| 23 | BICF2G630363226         | 53527389 | G | 0.5 | 0.5    | A |
| 23 | BICF2G630363208         | 53538809 | A | 0   | 0      | G |
| 23 | BICF2G630363202         | 53545851 | A | 0.5 | 0.5    | G |

|    |                         |          |   |     |        |   |
|----|-------------------------|----------|---|-----|--------|---|
| 23 | BICF2P398463            | 53563548 | A | 0.5 | 0.5    | G |
| 23 | BICF2G630363162         | 53566857 | A | 0.5 | 0.5    | C |
| 23 | BICF2G630363159         | 53568438 | C | 0   | 0      | A |
| 23 | BICF2G630363149         | 53581299 | A | 0.5 | 0.2143 | G |
| 23 | BICF2S2339357           | 53595112 | G | 0.5 | 0.5    | A |
| 23 | BICF2G630363119         | 53605497 | A | 0.5 | 0.2143 | G |
| 23 | BICF2G630363098         | 53621427 | A | 0.5 | 0.2143 | G |
| 23 | BICF2G630363072         | 53628484 | A | 0.5 | 0.5    | G |
| 23 | BICF2G630363038         | 53643605 | O | 0   | 0      | C |
| 23 | BICF2P724645            | 53658038 | G | 0   | 0      | A |
| 23 | BICF2P1368226           | 53667311 | A | 0   | 0      | G |
| 23 | BICF2G630363008         | 53671718 | A | 0   | 0      | C |
| 23 | BICF2G630362972         | 53686887 | G | 0.5 | 0.7857 | A |
| 23 | BICF2G630362961         | 53702199 | C | 0.5 | 0.6429 | A |
| 23 | BICF2G630362959         | 53709022 | A | 0   | 0      | C |
| 23 | BICF2G630362836         | 53767253 | G | 0.5 | 0.5    | A |
| 23 | BICF2G630362803         | 53783469 | A | 0   | 0      | G |
| 23 | BICF2P327010            | 53785558 | G | 0.5 | 0.2143 | A |
| 23 | BICF2G630362752         | 53800687 | A | 0   | 0.1429 | G |
| 23 | BICF2S23730962          | 53809871 | G | 0   | 0      | A |
| 23 | BICF2P277987            | 53824354 | A | 1   | 1      | G |
| 23 | BICF2P808500            | 53829073 | A | 0   | 0.4    | C |
| 23 | BICF2S2294322           | 53839768 | G | 0   | 0      | A |
| 23 | BICF2G630362728         | 53843106 | A | 0   | 0.25   | G |
| 23 | BICF2G630362709         | 53868191 | A | 0   | 0.4286 | G |
| 23 | BICF2G630362686         | 53877831 | A | 0   | 0      | G |
| 23 | BICF2P1121373           | 53889497 | A | 0   | 0      | G |
| 23 | BICF2G630362669         | 53903867 | A | 0   | 0      | C |
| 23 | BICF2G630362648         | 53915762 | A | 0   | 0.2857 | G |
| 23 | BICF2G630362622         | 53933498 | C | 0   | 0      | A |
| 23 | BICF2G630362617         | 53935732 | A | 0   | 0      | G |
| 23 | BICF2G630362554         | 53959176 | C | 0   | 0.4286 | A |
| 23 | BICF2G630362536         | 53968913 | C | 1   | 0.7143 | G |
| 23 | BICF2G630362527         | 53972027 | A | 0.5 | 0.3571 | G |
| 23 | BICF2G630362504         | 53982710 | T | 0.5 | 0.5    | A |
| 23 | BICF2G630362463         | 54002375 | A | 0   | 0      | G |
| 23 | BICF2G630362457         | 54006537 | G | 1   | 0.7143 | A |
| 23 | TIGRP2P309075_rs9250534 | 54022243 | G | 0   | 0.1429 | A |
| 23 | BICF2P1173214           | 54032705 | A | 0.5 | 0.2143 | G |
| 23 | BICF2S22954587          | 54044347 | A | 0   | 0.4286 | T |
| 23 | G1238f4S149             | 54050754 | A | 1   | 0.5714 | G |
| 23 | BICF2P895506            | 54116640 | A | 0   | 0      | G |
| 23 | BICF2G630362435         | 54123505 | A | 1   | 0.8571 | G |
| 23 | BICF2G630362347         | 54140155 | G | 0   | 0.1429 | A |
| 23 | BICF2G630362340         | 54142648 | G | 0   | 0.1429 | A |
| 23 | BICF2G630362289         | 54170131 | A | 0   | 0      | G |
| 23 | BICF2P224510            | 54170213 | G | 0   | 0.1429 | A |

|    |                         |          |   |    |        |   |
|----|-------------------------|----------|---|----|--------|---|
| 23 | BICF2P645223            | 54176288 | A | 1  | 0.8571 | G |
| 23 | BICF2G630362271         | 54178795 | A | 0  | 0      | G |
| 23 | BICF2P581234            | 54189681 | A | 0  | 0      | G |
| 23 | TIGRP2P309140_rs8815982 | 54200867 | G | 0  | 0      | A |
| 23 | BICF2G630362261         | 54224482 | 0 | 0  | 0      | G |
| 23 | BICF2P1108097           | 54236017 | A | 0  | 0.2857 | G |
| 23 | BICF2S23242285          | 54254043 | C | 1  | 0.7143 | A |
| 23 | BICF2P674777            | 54257188 | A | 0  | 0      | G |
| 23 | BICF2P829141            | 54271874 | A | 0  | 0      | G |
| 23 | BICF2G630362226         | 54281197 | A | 0  | 0      | G |
| 23 | BICF2S23316408          | 54299868 | G | 1  | 0.5714 | A |
| 23 | BICF2G630362187         | 54303881 | A | NA | 0      | G |
| 23 | BICF2G630362182         | 54318189 | G | 1  | 0.8571 | A |
| 23 | TIGRP2P309197_rs8963646 | 54329710 | A | 1  | 0.5714 | G |
| 23 | BICF2P1028731           | 54343135 | G | 0  | 0      | A |
| 23 | BICF2G630362157         | 54349152 | G | 1  | 1      | A |
| 23 | BICF2G630362119         | 54370893 | G | 0  | 0      | A |
| 23 | BICF2G630362118         | 54375159 | G | 0  | 0      | A |
| 23 | BICF2S2315825           | 54389717 | A | 0  | 0      | G |
| 23 | BICF2G630362114         | 54406734 | G | 1  | 0.5714 | A |
| 23 | TIGRP2P309220_rs8853974 | 54421486 | 0 | 0  | 0      | G |
| 23 | TIGRP2P309225_rs8940718 | 54437096 | A | 0  | 0      | C |
| 23 | BICF2G630362094         | 54447441 | G | 0  | 0      | A |
| 23 | BICF2P974620            | 54456582 | A | 0  | 0      | G |
| 23 | BICF2P913691            | 54466487 | G | 0  | 0      | A |
| 23 | BICF2P251422            | 54477950 | 0 | 0  | 0      | C |
| 23 | BICF2P879933            | 54487522 | C | 0  | 0      | A |
| 23 | BICF2P968356            | 54525643 | C | 0  | 0      | A |
| 23 | BICF2P573961            | 54533076 | A | 0  | 0.2143 | C |
| 23 | BICF2S23444402          | 54554181 | 0 | 0  | 0      | A |
| 23 | BICF2P184357            | 54590008 | 0 | 0  | 0      | A |
| 23 | BICF2P24589             | 54596495 | 0 | 0  | 0      | A |
| 23 | BICF2P434381            | 54606608 | A | 0  | 0      | G |
| 23 | TIGRP2P309317_rs9099930 | 54613864 | G | 0  | 0      | A |
| 23 | BICF2P1050829           | 54637804 | G | 0  | 0.2143 | A |
| 23 | BICF2P604265            | 54688715 | 0 | 0  | 0      | A |
| 23 | BICF2P73529             | 54722111 | A | 1  | 0.6429 | G |
| 23 | BICF2P1129395           | 54736390 | 0 | 0  | 0      | G |
| 23 | BICF2P413810            | 54762359 | A | 0  | 0      | G |
| 23 | BICF2S23430158          | 54770061 | G | 0  | 0      | A |
| 23 | BICF2P205119            | 54782161 | C | 0  | 0      | A |
| 23 | BICF2P958705            | 54789536 | 0 | 0  | 0      | A |
| 23 | BICF2S23043275          | 54814648 | A | 0  | 0      | G |
| 23 | BICF2P202327            | 54837446 | A | 0  | 0.1429 | G |
| 23 | TIGRP2P309344_rs8764344 | 54845403 | A | 0  | 0.3571 | T |
| 23 | BICF2P897025            | 54860348 | A | 0  | 0.2143 | G |
| 23 | BICF2P141645            | 54871457 | A | 0  | 0.2143 | G |



|    |                         |          |   |   |        |   |
|----|-------------------------|----------|---|---|--------|---|
| 23 | BICF2P726678            | 54880683 | G | 0 | 0.1429 | A |
| 23 | BICF2P1079607           | 54897046 | A | 0 | 0.1429 | G |
| 23 | BICF2S23528933          | 54911155 | A | 1 | 0.6429 | G |
| 23 | BICF2P1120160           | 54919283 | A | 0 | 0.3571 | G |
| 23 | BICF2P373712            | 54932409 | G | 0 | 0.3571 | A |
| 23 | BICF2S23018422          | 54946691 | G | 0 | 0.3571 | A |
| 23 | BICF2P28941             | 54953316 | A | 0 | 0.1429 | G |
| 23 | BICF2S23549391          | 54967548 | A | 1 | 0.75   | G |
| 23 | BICF2S23758423          | 54974608 | A | 0 | 0.1429 | C |
| 23 | BICF2P707837            | 54984112 | A | 0 | 0      | G |
| 23 | BICF2S2345578           | 55011526 | C | 0 | 0.1429 | G |
| 23 | TIGRP2P310242_rs8586287 | 55022912 | A | 0 | 0      | G |
| 23 | BICF2S23627140          | 55035158 | A | 0 | 0.1429 | C |
| 23 | BICF2P65610             | 55053383 | G | 0 | 0      | A |
| 23 | TIGRP2P310256_rs9078179 | 55062523 | G | 0 | 0      | A |
| 23 | BICF2P810953            | 55079914 | A | 0 | 0.1429 | G |
| 23 | BICF2S2299071           | 55092974 | C | 0 | 0      | G |
| 23 | BICF2P195051            | 55103040 | A | 0 | 0.1429 | G |
| 23 | BICF2P668892            | 55109441 | A | 0 | 0      | C |
| 23 | TIGRP2P310283_rs9136155 | 55121865 | A | 0 | 0.2143 | G |
| 23 | BICF2P533503            | 55140965 | 0 | 0 | 0      | A |
| 23 | BICF2S23739950          | 55144505 | C | 0 | 0      | G |
| 23 | BICF2P670832            | 55156907 | A | 0 | 0      | G |
| 23 | BICF2P792546            | 55165867 | G | 0 | 0      | A |
| 23 | TIGRP2P310295_rs8918423 | 55182536 | A | 0 | 0.3571 | G |
| 23 | BICF2S23146892          | 55191847 | G | 0 | 0      | A |
| 23 | BICF2S23157961          | 55207227 | A | 0 | 0      | G |
| 23 | BICF2S23426173          | 55216895 | A | 0 | 0      | G |
| 23 | BICF2S23426176          | 55217286 | A | 0 | 0      | G |
| 23 | BICF2S23425789          | 55220474 | A | 0 | 0      | G |
| 23 | BICF2P693477            | 55228631 | G | 0 | 0      | A |
| 23 | BICF2S23751169          | 55239008 | A | 0 | 0      | G |
| 23 | BICF2P1357095           | 55265217 | G | 0 | 0      | A |
| 23 | TIGRP2P310369_rs8849956 | 55272716 | A | 0 | 0      | G |
| 23 | BICF2S23051382          | 55299696 | G | 0 | 0.1429 | A |
| 23 | BICF2S23630013          | 55314264 | 0 | 0 | 0      | G |
| 23 | G1240f8S151             | 55323023 | A | 0 | 0      | G |
| 23 | G1240f12S188            | 55360537 | A | 0 | 0      | G |
| 23 | G1240f13S213            | 55361087 | 0 | 0 | 0      | G |
| 23 | BICF2P374432            | 55386667 | A | 0 | 0.1429 | G |
| 25 | BICF2P440936            | 3106641  | 0 | 0 | 0      | A |
| 25 | BICF2P292988            | 3137113  | G | 0 | 0.2857 | A |
| 25 | BICF2P687621            | 3151188  | C | 0 | 0      | G |
| 25 | BICF2S24322550          | 3165926  | 0 | 0 | 0      | A |
| 25 | BICF2P455377            | 3198135  | 0 | 0 | 0      | G |
| 25 | TIGRP2P323741_rs8542112 | 3209672  | 0 | 0 | 0      | A |
| 25 | G1264f13S136            | 3235300  | 0 | 0 | 0      | A |

|    |                         |         |   |     |        |   |
|----|-------------------------|---------|---|-----|--------|---|
| 25 | TIGRP2P323749_rs8843851 | 3264720 | 0 | 0   | 0      | A |
| 25 | TIGRP2P323965_rs9026338 | 3298982 | 0 | 0   | 0      | G |
| 25 | BICF2P1269718           | 3347661 | 0 | 0   | 0      | C |
| 25 | BICF2P935494            | 3379959 | C | 0   | 0      | A |
| 25 | BICF2P862104            | 3424154 | 0 | 0   | 0      | A |
| 25 | BICF2P6074              | 3429962 | 0 | 0   | 0      | A |
| 25 | BICF2P1401214           | 3472621 | 0 | 0   | 0      | T |
| 25 | BICF2P1418949           | 3507411 | A | 0.5 | 0.5    | G |
| 25 | BICF2P1021649           | 3511020 | 0 | 0   | 0      | A |
| 25 | BICF2S2452310           | 3529567 | G | 0   | 0      | A |
| 25 | BICF2P455589            | 3531567 | 0 | 0   | 0      | A |
| 25 | G1269f49S146            | 3603872 | A | 0   | 0      | G |
| 25 | TIGRP2P323984_rs9197833 | 3617199 | 0 | 0   | 0      | A |
| 25 | BICF2P237659            | 3626990 | 0 | 0   | 0      | A |
| 25 | BICF2P228588            | 3639672 | 0 | 0   | 0      | G |
| 25 | BICF2S23125406          | 3654036 | G | 0   | 0      | A |
| 25 | BICF2S23217283          | 3661895 | G | 0.5 | 0.7857 | A |
| 25 | BICF2P257741            | 3680074 | 0 | 0   | 0      | C |
| 25 | TIGRP2P323985_rs8829356 | 3696744 | 0 | 0   | 0      | G |
| 25 | G1270f26S101            | 3710732 | A | 0   | 0      | C |
| 25 | BICF2P781481            | 3736739 | A | 0.5 | 0.7857 | C |
| 25 | BICF2P1082541           | 3740109 | 0 | 0   | 0      | G |
| 25 | BICF2P42017             | 3771647 | 0 | 0   | 0      | A |
| 25 | TIGRP2P323990_rs9036810 | 3777047 | 0 | 0   | 0      | G |
| 25 | BICF2P1512064           | 3785978 | 0 | 0   | 0      | G |
| 25 | BICF2P954395            | 3813167 | A | 0.5 | 0.7857 | G |
| 25 | BICF2P887964            | 3836652 | 0 | 0   | 0      | C |
| 25 | BICF2P606523            | 3848770 | 0 | 0   | 0      | C |
| 25 | BICF2S2294459           | 3871074 | 0 | 0   | 0      | A |
| 25 | TIGRP2P323991_rs8865507 | 3887580 | 0 | 0   | 0      | A |
| 25 | G1271f51S55             | 3917711 | G | 0   | 0      | A |
| 25 | BICF2S23410129          | 3945323 | A | 0   | 0      | G |
| 25 | BICF2P680279            | 3958317 | A | 0.5 | 0.7857 | G |
| 25 | G1272f29S266            | 3982677 | 0 | 0   | 0      | G |
| 25 | BICF2P319462            | 4008411 | C | 0   | 0      | G |
| 25 | TIGRP2P323994_rs9067427 | 4026380 | 0 | 0   | 0      | A |
| 25 | TIGRP2P323996_rs8542313 | 4059026 | 0 | 0   | 0      | A |
| 25 | G1273f44S196            | 4065978 | A | 0   | 0      | G |
| 25 | TIGRP2P323997_rs8577210 | 4085293 | C | 0.5 | 0.7857 | A |
| 25 | BICF2P246399            | 4099957 | 0 | 0   | 0      | C |
| 25 | BICF2P1468700           | 4122303 | 0 | 0   | 0      | G |
| 25 | BICF2P557453            | 4138739 | 0 | 0   | 0      | G |
| 25 | BICF2P1252176           | 4146352 | 0 | 0   | 0      | T |
| 25 | G1274f64S207            | 4166476 | G | 0   | 0      | A |
| 25 | BICF2S2445408           | 4215258 | G | 0   | 0      | A |
| 25 | BICF2P364169            | 4245951 | A | 0   | 0      | G |
| 25 | BICF2P770120            | 4259722 | 0 | 0   | 0      | A |

|    |                |         |   |     |        |   |
|----|----------------|---------|---|-----|--------|---|
| 25 | BICF2S22918372 | 4270440 | G | 0   | 0      | A |
| 25 | G1276f43S106   | 4291721 | 0 | 0   | 0      | C |
| 25 | BICF2S2393772  | 4312321 | 0 | 0   | 0      | A |
| 25 | BICF2P1368125  | 4312886 | 0 | 0   | 0      | G |
| 25 | BICF2S23337362 | 4326633 | A | 0.5 | 0.7857 | G |
| 25 | BICF2P1404199  | 4337127 | 0 | 0   | 0      | T |
| 25 | BICF2P519214   | 4385776 | G | 0   | 0      | A |
| 25 | G1277f37S114   | 4407372 | A | 0   | 0      | T |
| 25 | BICF2P18632    | 4426599 | 0 | 0   | 0      | A |
| 25 | BICF2P688745   | 4437742 | 0 | 0   | 0      | T |
| 25 | G1278f13S193   | 4459836 | C | NA  | 0      | A |
| 25 | BICF2P1121530  | 4483387 | G | 0   | 0      | A |
| 25 | BICF2P182456   | 4487699 | 0 | 0   | 0      | A |
| 25 | BICF2P801522   | 4498370 | 0 | 0   | 0      | A |
| 25 | G1279f35S56    | 4523552 | A | 0   | 0      | G |
| 25 | BICF2P1219963  | 4555664 | 0 | 0   | 0      | A |
| 25 | BICF2P364423   | 4583877 | G | 0.5 | 0.7857 | A |
| 25 | BICF2P495109   | 4595401 | A | 0.5 | 0.7857 | G |
| 25 | BICF2P946231   | 4600671 | A | 0.5 | 0.7857 | G |
| 25 | BICF2P585436   | 4614074 | G | 0.5 | 0.7857 | A |
| 25 | BICF2P693853   | 4618303 | G | 0.5 | 0.8333 | A |
| 25 | BICF2P695970   | 4624918 | G | 0.5 | 0.7857 | A |
| 25 | BICF2P222877   | 4634589 | A | 0.5 | 0.7857 | G |
| 25 | BICF2P437225   | 4652475 | A | 0.5 | 0.7857 | G |
| 25 | BICF2P1068788  | 4664038 | A | 0.5 | 0.7857 | G |
| 25 | BICF2P152959   | 4673552 | A | 0   | 0      | G |
| 25 | BICF2P323490   | 4692536 | G | 0.5 | 0.7857 | A |
| 25 | BICF2P729516   | 4725020 | A | 0.5 | 0.7857 | G |
| 25 | BICF2P1103811  | 4737902 | C | 0.5 | 0.7857 | A |
| 25 | BICF2P652815   | 4740903 | A | 0.5 | 0.7857 | G |
| 25 | BICF2P652814   | 4741072 | G | 0.5 | 0.7857 | A |
| 25 | BICF2P549319   | 4752645 | G | 0.5 | 0.7857 | A |
| 25 | BICF2S23448384 | 4771639 | A | 0.5 | 0.8333 | G |
| 25 | BICF2P1211008  | 4779938 | 0 | 0   | 0      | A |
| 25 | BICF2P1136156  | 4787977 | 0 | 0   | 0      | A |
| 25 | BICF2S23050265 | 4807669 | G | 0.5 | 0.7857 | A |
| 25 | BICF2S23624872 | 4828638 | G | 0.5 | 0.7857 | A |
| 25 | BICF2P523083   | 4848097 | C | 0   | 0      | G |
| 25 | BICF2P520164   | 4869589 | 0 | 0   | 0      | A |
| 25 | BICF2P899218   | 4892327 | 0 | 0   | 0      | G |
| 25 | BICF2S23610498 | 4903222 | A | 0   | 0      | G |
| 25 | BICF2P1207662  | 4915672 | 0 | 0   | 0      | C |
| 25 | BICF2S23448405 | 4937679 | A | 0   | 0      | T |
| 25 | BICF2S23441182 | 4948469 | G | 0   | 0      | A |
| 25 | BICF2S23413171 | 4957263 | A | 0   | 0      | C |
| 25 | BICF2P721472   | 4977227 | 0 | 0   | 0      | G |
| 25 | BICF2S23450351 | 5009967 | A | 0   | 0      | G |

|    |                         |         |   |     |        |   |
|----|-------------------------|---------|---|-----|--------|---|
| 25 | BICF2P58377             | 5022208 | A | 0   | 0      | C |
| 25 | BICF2S23217090          | 5036578 | G | 0   | 0      | A |
| 25 | TIGRP2P335689_rs9153039 | 5040240 | C | 0.5 | 0.7857 | A |
| 25 | TIGRP2P335691_rs9121881 | 5057787 | A | 0.5 | 0.7857 | C |
| 25 | BICF2P505496            | 5061072 | A | 0.5 | 0.7857 | G |
| 25 | BICF2P795092            | 5076008 | A | 0   | 0      | G |
| 25 | BICF2P621393            | 5084716 | A | 0.5 | 0.7857 | C |
| 25 | BICF2P865907            | 5094729 | 0 | 0   | 0      | G |
| 25 | BICF2P375949            | 5106928 | A | 0   | 0      | G |
| 25 | BICF2P79555             | 5122413 | G | 0   | 0      | A |
| 25 | BICF2P975188            | 5132478 | G | 0   | 0      | A |
| 25 | TIGRP2P335730_rs8551022 | 5141416 | A | 0.5 | 0.7857 | G |
| 25 | BICF2P930330            | 5160521 | A | 0   | 0      | G |
| 25 | BICF2P840626            | 5165793 | A | 0.5 | 0.7857 | G |
| 25 | BICF2P1341002           | 5189159 | A | 0   | 0      | C |
| 25 | BICF2P1096478           | 5198303 | C | 1   | 1      | A |
| 25 | BICF2P698772            | 5209894 | 0 | 0   | 0      | G |
| 25 | BICF2S23242124          | 5225121 | 0 | 0   | 0      | C |
| 25 | BICF2P450490            | 5243289 | 0 | 0   | 0      | A |
| 25 | BICF2P1386393           | 5252248 | A | 1   | 1      | G |
| 25 | BICF2P1077626           | 5263869 | A | 1   | 1      | G |
| 25 | BICF2P482053            | 5269169 | C | 1   | 1      | A |
| 25 | BICF2P448956            | 5280720 | A | NA  | 0      | C |
| 25 | TIGRP2P335773_rs9173721 | 5295543 | A | 1   | 1      | G |
| 25 | BICF2P573302            | 5308706 | A | 1   | 1      | G |
| 25 | BICF2P1065296           | 5315384 | G | 1   | 1      | A |
| 25 | BICF2P961616            | 5326472 | G | 1   | 1      | A |
| 25 | BICF2P60855             | 5339258 | G | 1   | 1      | A |
| 25 | BICF2P443223            | 5377908 | G | 1   | 1      | A |
| 25 | BICF2P658727            | 5391929 | A | 1   | 1      | G |
| 25 | BICF2P55825             | 5401651 | C | 1   | 1      | A |
| 25 | BICF2P1216095           | 5405581 | G | 1   | 1      | A |
| 25 | TIGRP2P335820_rs8847362 | 5420418 | A | 1   | 1      | G |
| 25 | TIGRP2P335825_rs9230918 | 5436749 | A | 1   | 1      | G |
| 25 | BICF2P353039            | 5440491 | G | 1   | 1      | A |
| 25 | TIGRP2P335829_rs8584985 | 5463055 | A | 1   | 1      | G |
| 25 | BICF2P733613            | 5479902 | C | 1   | 1      | A |
| 25 | BICF2P1247607           | 5491314 | A | 1   | 1      | G |
| 25 | BICF2P1431777           | 5503734 | G | 0   | 0      | A |
| 25 | BICF2P1071734           | 5517822 | A | 0   | 0      | C |
| 25 | TIGRP2P335854_rs8738742 | 5529024 | A | 1   | 1      | C |
| 25 | TIGRP2P335856_rs8988095 | 5532699 | G | 0   | 0      | A |
| 25 | BICF2P831513            | 5563500 | A | 0   | 0      | G |
| 25 | TIGRP2P335867_rs9091020 | 5567339 | A | 0   | 0      | G |
| 25 | BICF2P297033            | 5584086 | 0 | 0   | 0      | A |
| 25 | BICF2P157084            | 5589345 | G | 0   | 0      | A |
| 25 | BICF2P1385678           | 5606977 | C | 0   | 0      | A |

|    |                         |         |   |   |   |   |
|----|-------------------------|---------|---|---|---|---|
| 25 | TIGRP2P335881_rs8889447 | 5617160 | G | 0 | 0 | A |
| 25 | BICF2P1341691           | 5632194 | 0 | 0 | 0 | G |
| 25 | TIGRP2P335887_rs8543860 | 5639671 | A | 0 | 0 | C |
| 25 | BICF2P718503            | 5654418 | A | 0 | 0 | G |
| 25 | BICF2P1378360           | 5662321 | C | 0 | 0 | A |
| 25 | BICF2P430642            | 5672242 | C | 0 | 0 | A |
| 25 | BICF2P323858            | 5698253 | 0 | 0 | 0 | A |
| 25 | BICF2P232542            | 5710902 | 0 | 0 | 0 | A |
| 25 | BICF2P411508            | 5716770 | 0 | 0 | 0 | G |
| 25 | TIGRP2P335910_rs9117020 | 5727246 | G | 0 | 0 | A |
| 25 | BICF2P486297            | 5745911 | G | 1 | 1 | A |
| 25 | TIGRP2P335921_rs8748842 | 5771591 | 0 | 0 | 0 | G |
| 25 | BICF2S23733505          | 5787296 | 0 | 0 | 0 | T |
| 25 | BICF2P1205529           | 5799986 | A | 0 | 0 | T |
| 25 | BICF2P337961            | 5816424 | T | 0 | 0 | A |
| 25 | BICF2P1472184           | 5821920 | G | 0 | 0 | A |
| 25 | BICF2S2445745           | 5830915 | A | 1 | 1 | G |
| 25 | BICF2P582906            | 5842879 | G | 0 | 0 | A |
| 25 | BICF2P1324669           | 5856413 | A | 1 | 1 | G |
| 25 | TIGRP2P335949_rs8827130 | 5870751 | A | 0 | 0 | C |
| 25 | TIGRP2P335951_rs8812883 | 5893370 | G | 0 | 0 | A |
| 25 | BICF2S23553327          | 5904645 | G | 0 | 0 | A |
| 25 | BICF2S23316136          | 5918027 | G | 0 | 0 | A |
| 25 | BICF2P1378615           | 5924822 | G | 0 | 0 | A |
| 25 | BICF2P1377640           | 5937813 | G | 0 | 0 | A |
| 25 | BICF2P656792            | 5952928 | G | 0 | 0 | A |
| 25 | BICF2P837055            | 5958865 | G | 0 | 0 | A |
| 25 | TIGRP2P335954_rs9157478 | 5977396 | G | 1 | 1 | A |
| 25 | BICF2P1403711           | 5994452 | A | 0 | 0 | G |
| 25 | TIGRP2P335956_rs9042076 | 6011402 | 0 | 0 | 0 | A |
| 25 | BICF2S23639459          | 6014776 | G | 0 | 0 | A |
| 25 | BICF2S23114450          | 6035956 | C | 0 | 0 | A |
| 25 | BICF2P1068834           | 6045585 | A | 0 | 0 | G |
| 25 | BICF2P894837            | 6049534 | A | 0 | 0 | G |
| 25 | BICF2P1039271           | 6068291 | G | 0 | 0 | A |
| 25 | BICF2P1100037           | 6073775 | G | 0 | 0 | A |
| 25 | BICF2P626044            | 6091591 | G | 0 | 0 | A |
| 25 | BICF2S23710199          | 6104918 | 0 | 0 | 0 | A |
| 25 | BICF2P1014595           | 6115389 | A | 0 | 0 | C |
| 25 | BICF2P332239            | 6118759 | G | 0 | 0 | A |
| 25 | BICF2P221473            | 6145155 | A | 0 | 0 | C |
| 25 | BICF2P1019199           | 6154993 | A | 0 | 0 | C |
| 25 | BICF2P1389028           | 6168839 | G | 0 | 0 | A |
| 25 | BICF2P131102            | 6179675 | A | 0 | 0 | G |
| 25 | BICF2P848049            | 6195186 | G | 0 | 0 | A |
| 25 | TIGRP2P335970_rs8650928 | 6206369 | A | 0 | 0 | G |
| 25 | TIGRP2P335973_rs9154399 | 6213123 | G | 0 | 0 | A |

|    |                         |         |   |   |   |   |
|----|-------------------------|---------|---|---|---|---|
| 25 | BICF2P152560            | 6224422 | A | 0 | 0 | G |
| 25 | BICF2P269               | 6237067 | G | 0 | 0 | A |
| 25 | BICF2P926765            | 6251796 | A | 0 | 0 | G |
| 25 | TIGRP2P335982_rs9090253 | 6256590 | C | 0 | 0 | A |
| 25 | BICF2P391500            | 6269919 | A | 0 | 0 | G |
| 25 | BICF2S23020566          | 6290627 | A | 0 | 0 | G |
| 25 | BICF2S23647117          | 6303590 | A | 0 | 0 | G |
| 25 | BICF2P1227410           | 6319400 | A | 0 | 0 | G |
| 25 | BICF2P1277613           | 6327388 | A | 0 | 0 | G |
| 25 | BICF2S2334892           | 6341681 | A | 0 | 0 | G |
| 25 | BICF2P723251            | 6350302 | G | 0 | 0 | A |
| 25 | BICF2P1314216           | 6363909 | A | 0 | 0 | G |
| 25 | BICF2P246237            | 6380577 | 0 | 0 | 0 | G |
| 25 | BICF2P281678            | 6397101 | A | 0 | 0 | C |
| 25 | TIGRP2P336011_rs8641183 | 6433664 | A | 0 | 0 | C |
| 25 | BICF2P81316             | 6458136 | 0 | 0 | 0 | A |
| 25 | BICF2P1361869           | 6474381 | G | 0 | 0 | A |
| 25 | BICF2S2393527           | 6476047 | C | 0 | 0 | G |
| 25 | BICF2P1345394           | 6490642 | G | 0 | 0 | A |
| 25 | BICF2P276059            | 6507821 | A | 0 | 0 | G |
| 25 | TIGRP2P336022_rs9153545 | 6519653 | C | 0 | 0 | A |
| 25 | BICF2P1021988           | 6530033 | G | 0 | 0 | A |
| 25 | BICF2P465926            | 6532105 | 0 | 0 | 0 | A |
| 25 | BICF2P837744            | 6548096 | G | 0 | 0 | A |
| 25 | BICF2S2373505           | 6556225 | A | 0 | 0 | G |
| 25 | BICF2P1194896           | 6574160 | 0 | 0 | 0 | G |
| 25 | BICF2P1205861           | 6588770 | A | 0 | 0 | G |
| 25 | BICF2P544880            | 6596083 | G | 0 | 0 | A |
| 25 | BICF2P499158            | 6613589 | C | 0 | 0 | A |
| 25 | BICF2P378371            | 6627762 | A | 0 | 0 | G |
| 25 | BICF2P929020            | 6644383 | A | 0 | 0 | G |
| 25 | BICF2P99615             | 6656637 | A | 0 | 0 | G |
| 25 | TIGRP2P336055_rs9171607 | 6664340 | A | 0 | 0 | C |
| 25 | BICF2S2295760           | 6679886 | A | 0 | 0 | G |
| 25 | BICF2S22936426          | 6682283 | A | 0 | 0 | G |
| 25 | TIGRP2P336066_rs9171774 | 6698424 | A | 0 | 0 | G |
| 25 | TIGRP2P336069_rs9136697 | 6706166 | G | 0 | 0 | A |
| 25 | BICF2P1179136           | 6753887 | C | 0 | 0 | A |
| 25 | BICF2S23116109          | 6775531 | G | 0 | 0 | A |
| 25 | BICF2P1138593           | 6796325 | G | 0 | 0 | A |
| 25 | BICF2P183049            | 6800442 | C | 0 | 0 | A |
| 25 | BICF2P1115114           | 6801189 | G | 0 | 0 | A |
| 25 | BICF2P814961            | 6817356 | C | 0 | 0 | A |
| 25 | BICF2P92343             | 6824472 | A | 0 | 0 | G |
| 25 | BICF2S23317257          | 6831860 | G | 0 | 0 | A |
| 25 | BICF2P493568            | 6846546 | A | 0 | 0 | G |
| 25 | BICF2S23751649          | 6860953 | G | 0 | 0 | A |

|    |                         |         |   |     |     |   |
|----|-------------------------|---------|---|-----|-----|---|
| 25 | BICF2S23130071          | 6871038 | C | 0   | 0   | G |
| 25 | BICF2P856260            | 6892597 | C | 0   | 0   | A |
| 25 | BICF2S23332769          | 6910205 | T | 0   | 0   | A |
| 25 | BICF2P105775            | 6914687 | C | 0   | 0   | A |
| 25 | BICF2P280109            | 6925173 | A | 0   | 0   | C |
| 25 | BICF2P985840            | 6940857 | A | 0   | 0   | G |
| 25 | BICF2P97563             | 6947059 | A | 0   | 0   | G |
| 25 | TIGRP2P336135_rs8843198 | 6966988 | A | 0   | 0   | C |
| 25 | BICF2P719243            | 6972271 | 0 | 0   | 0   | G |
| 25 | G1280f31S245            | 7001966 | 0 | 0   | 0   | C |
| 25 | TIGRP2P336143_rs8703313 | 7018885 | A | 0.5 | 0.5 | C |
| 25 | BICF2P1246294           | 7029949 | G | 0.5 | 0.5 | A |
| 25 | TIGRP2P336153_rs8876546 | 7053675 | G | 0.5 | 0.5 | A |
| 25 | TIGRP2P336157_rs9063839 | 7074606 | A | 0.5 | 0.5 | G |
| 25 | TIGRP2P336169_rs9107164 | 7088339 | G | 0.5 | 0.5 | A |
| 25 | TIGRP2P336179_rs8563051 | 7111462 | G | 0.5 | 0.7 | A |
| 25 | BICF2S23355386          | 7128259 | A | 0.5 | 0.5 | G |
| 25 | BICF2P815416            | 7132990 | G | 0.5 | 0.5 | A |
| 25 | BICF2P184323            | 7141704 | C | 0.5 | 0.5 | A |
| 25 | BICF2S2359141           | 7142202 | C | 0.5 | 0.5 | G |
| 25 | BICF2P60406             | 7154990 | G | 0.5 | 0.5 | A |
| 25 | BICF2P1238933           | 7172163 | C | 0.5 | 0.5 | G |
| 25 | TIGRP2P336204_rs8991574 | 7178631 | A | 0.5 | 0.5 | G |
| 25 | BICF2P177820            | 7200136 | C | 0.5 | 0.5 | G |
| 25 | TIGRP2P336234_rs8626505 | 7230870 | 0 | 0   | 0   | G |
| 25 | BICF2P424639            | 7243218 | C | 0   | 0   | A |
| 25 | BICF2S23547392          | 7251461 | A | 0   | 0   | G |
| 25 | BICF2P294249            | 7271327 | A | 0   | 0   | G |
| 25 | BICF2P1360795           | 7286389 | A | 1   | 1   | C |
| 25 | BICF2P376560            | 7296129 | G | 0   | 0   | A |
| 25 | TIGRP2P336240_rs8529799 | 7335862 | G | 1   | 1   | A |
| 25 | TIGRP2P336245_rs9194076 | 7341214 | A | 0   | 0   | G |
| 25 | BICF2P104830            | 7353147 | G | 1   | 1   | A |
| 25 | BICF2S22950994          | 7365320 | A | 1   | 1   | G |
| 25 | BICF2P1169113           | 7373152 | C | 1   | 1   | A |
| 25 | BICF2S23217020          | 7390038 | G | 0   | 0   | A |
| 25 | BICF2P312914            | 7398239 | 0 | 0   | 0   | C |
| 25 | BICF2S23339320          | 7416315 | G | 1   | 1   | A |
| 25 | TIGRP2P336261_rs8741419 | 7428616 | G | 0   | 0   | A |
| 25 | TIGRP2P336264_rs8855203 | 7432354 | G | 0   | 0   | A |
| 25 | BICF2P182571            | 7443265 | A | 1   | 1   | G |
| 25 | BICF2P224736            | 7460739 | A | 0   | 0   | G |
| 25 | BICF2P1174072           | 7468345 | G | 1   | 1   | A |
| 25 | BICF2P1345156           | 7483874 | G | 1   | 1   | A |
| 25 | BICF2P1110638           | 7496627 | G | 1   | 1   | A |
| 25 | BICF2P866817            | 7508544 | A | 1   | 1   | C |
| 25 | BICF2P274397            | 7516841 | C | 1   | 1   | G |

|    |                         |         |   |     |     |   |
|----|-------------------------|---------|---|-----|-----|---|
| 25 | BICF2P496245            | 7531081 | A | 1   | 1   | G |
| 25 | BICF2P520236            | 7542355 | A | 0   | 0   | G |
| 25 | BICF2P1038011           | 7548211 | G | 1   | 1   | A |
| 25 | BICF2P717722            | 7561601 | A | 1   | 1   | G |
| 25 | BICF2P1394334           | 7567811 | C | 1   | 1   | G |
| 25 | BICF2P913121            | 7585744 | C | 1   | 1   | A |
| 25 | BICF2P1362405           | 7600291 | G | 0.5 | 0.5 | A |
| 25 | BICF2P845052            | 7604354 | 0 | 0   | 0   | C |
| 25 | BICF2P596319            | 7616133 | A | 1   | 1   | G |
| 25 | BICF2P869597            | 7630121 | C | 0   | 0   | A |
| 25 | BICF2P315460            | 7657498 | A | 0   | 0   | G |
| 25 | BICF2P713157            | 7679172 | A | 0   | 0   | G |
| 25 | BICF2P811110            | 7683215 | G | 0   | 0   | A |
| 25 | BICF2P1165371           | 7696525 | A | 1   | 1   | G |
| 25 | BICF2P1201715           | 7708654 | A | 0.5 | 0.5 | C |
| 25 | BICF2P1448194           | 7722282 | A | 0   | 0   | T |
| 25 | BICF2P975365            | 7735263 | A | 0   | 0   | G |
| 25 | BICF2P532633            | 7748579 | A | 0   | 0   | G |
| 25 | BICF2P1033853           | 7761485 | G | 0   | 0   | C |
| 25 | BICF2P235819            | 7770306 | A | 0   | 0   | G |
| 25 | TIGRP2P336283_rs8890460 | 7778076 | A | 0   | 0   | G |
| 25 | BICF2P137430            | 7790255 | A | 0   | 0   | G |
| 25 | BICF2P1064106           | 7802347 | G | 0   | 0   | A |
| 25 | BICF2P994403            | 7806443 | G | 0   | 0   | A |
| 25 | BICF2P312434            | 7813246 | T | 0   | 0   | A |
| 25 | TIGRP2P336296_rs8861912 | 7820591 | A | 0   | 0   | G |
| 25 | BICF2P430779            | 7840658 | C | 0.5 | 0.5 | G |
| 25 | BICF2P430780            | 7840795 | A | 0.5 | 0.5 | G |
| 25 | BICF2P998344            | 7845709 | A | 0.5 | 0.5 | C |
| 25 | BICF2P1180750           | 7854901 | A | 0.5 | 0.5 | G |
| 25 | BICF2P38124             | 7872488 | A | 0.5 | 0.5 | G |
| 25 | BICF2S23454088          | 7876418 | A | 0.5 | 0.5 | G |
| 25 | BICF2S23454089          | 7876511 | G | 0.5 | 0.5 | A |
| 25 | BICF2P1257047           | 7880047 | G | 0.5 | 0.5 | A |
| 25 | BICF2P977066            | 7898575 | G | 0.5 | 0.5 | A |
| 25 | BICF2P1300419           | 7905160 | C | 0.5 | 0.5 | A |
| 25 | BICF2P845784            | 7913730 | A | 0.5 | 0.5 | C |
| 25 | BICF2S23234581          | 7923605 | 0 | 0   | 0   | G |
| 25 | BICF2P935650            | 7937603 | A | 0.5 | 0.5 | G |
| 25 | TIGRP2P336299_rs8966046 | 7970774 | 0 | 0   | 0   | A |
| 25 | BICF2P877170            | 7991180 | A | 0.5 | 0.5 | G |
| 25 | BICF2P852005            | 7992814 | A | 0   | 0   | G |
| 25 | BICF2P240408            | 8010815 | 0 | 0   | 0   | G |
| 25 | TIGRP2P336303_rs9115026 | 8019882 | G | 0.5 | 0.5 | A |
| 25 | BICF2P665129            | 8027636 | G | 0.5 | 0.5 | A |
| 25 | BICF2P687807            | 8043749 | A | 0   | 0   | G |
| 25 | TIGRP2P336316_rs8843224 | 8053141 | G | 0   | 0   | A |



|    |                         |         |   |     |     |   |
|----|-------------------------|---------|---|-----|-----|---|
| 25 | TIGRP2P336318_rs8661597 | 8071248 | A | 0.5 | 0.5 | G |
| 25 | BICF2P152038            | 8081568 | G | 0   | 0   | A |
| 25 | TIGRP2P336319_rs8672156 | 8103044 | 0 | 0   | 0   | A |
| 25 | BICF2S23134922          | 8128723 | A | 0   | 0   | G |
| 25 | BICF2P1096316           | 8145166 | G | 0   | 0   | C |
| 25 | BICF2P450584            | 8158024 | A | 0   | 0   | G |
| 25 | BICF2P348249            | 8213628 | C | 0   | 0   | A |
| 25 | BICF2P1098827           | 8231073 | A | 0.5 | 0.5 | G |
| 25 | BICF2P540545            | 8250193 | 0 | 0   | 0   | C |
| 25 | BICF2P707621            | 8277225 | 0 | 0   | 0   | A |
| 25 | BICF2P92196             | 8285545 | A | 0   | 0   | G |
| 25 | BICF2P252483            | 8303197 | G | 0   | 0   | A |
| 25 | BICF2P318502            | 8362462 | G | 0   | 0   | A |
| 25 | BICF2P103467            | 8375354 | C | 0   | 0   | A |
| 25 | BICF2S2298923           | 8385645 | G | 0   | 0   | A |
| 25 | BICF2P215140            | 8399825 | 0 | 0   | 0   | G |
| 25 | BICF2P460912            | 8420243 | C | 0   | 0   | A |
| 25 | BICF2P1095006           | 8431087 | G | 0   | 0   | A |
| 25 | BICF2P185826            | 8445718 | T | 0   | 0   | A |
| 25 | BICF2P748411            | 8459837 | 0 | 0   | 0   | A |
| 25 | BICF2S23550629          | 8481465 | A | 0   | 0   | G |
| 25 | BICF2P124939            | 8487185 | G | 0   | 0   | A |
| 25 | BICF2P193465            | 8517584 | T | 0   | 0   | A |
| 25 | BICF2S22941967          | 8523479 | G | 0.5 | 0.5 | A |
| 25 | TIGRP2P336338_rs8617896 | 8538995 | G | 0   | 0   | C |
| 25 | BICF2P134984            | 8545326 | A | 0   | 0   | G |
| 25 | BICF2P445353            | 8557417 | A | 0   | 0   | G |
| 25 | BICF2P291827            | 8570558 | G | 0   | 0   | C |
| 25 | BICF2S23650270          | 8580254 | 0 | 0   | 0   | A |
| 25 | TIGRP2P336369_rs9252788 | 8612155 | A | 0   | 0   | G |
| 25 | BICF2P918481            | 8623269 | A | 0   | 0   | G |
| 25 | BICF2P950025            | 8630882 | A | 0   | 0   | G |
| 25 | BICF2P1072764           | 8636861 | G | 0   | 0   | A |
| 25 | TIGRP2P336384_rs8739610 | 8648052 | G | 0   | 0   | A |
| 25 | TIGRP2P336393_rs8507905 | 8664745 | G | 0   | 0   | A |
| 25 | BICF2P551598            | 8674379 | A | 0.5 | 0.5 | G |
| 25 | BICF2P776019            | 8690337 | A | 0   | 0   | G |
| 25 | BICF2P132334            | 8694143 | A | 0   | 0   | G |
| 25 | TIGRP2P336415_rs9084998 | 8720727 | G | 0   | 0   | A |
| 25 | BICF2P568427            | 8736554 | G | 0.5 | 0.5 | A |
| 25 | BICF2P909368            | 8741954 | C | 0   | 0   | A |
| 25 | BICF2S2352265           | 8752002 | A | 0.5 | 0.5 | G |
| 25 | BICF2S23148168          | 8772816 | G | 0   | 0   | A |
| 25 | BICF2P794055            | 8778796 | G | 0   | 0   | A |
| 25 | BICF2P1090293           | 8789826 | G | 0.5 | 0.5 | A |
| 25 | BICF2P1290725           | 8797879 | A | 1   | 1   | C |
| 25 | BICF2P1290730           | 8801064 | T | 0   | 0   | A |

|    |                         |         |   |     |        |   |
|----|-------------------------|---------|---|-----|--------|---|
| 25 | BICF2S231728            | 8809710 | G | 0.5 | 0.5    | A |
| 25 | BICF2P744293            | 8824535 | A | 0   | 0      | G |
| 25 | BICF2P602651            | 8832472 | C | 0   | 0      | A |
| 25 | BICF2P1118205           | 8846299 | G | 0   | 0      | A |
| 25 | BICF2P1012856           | 8856088 | A | 0   | 0      | G |
| 25 | BICF2P506467            | 8869516 | A | 0   | 0      | G |
| 25 | BICF2P776124            | 8894413 | G | 0   | 0      | A |
| 25 | BICF2P810280            | 8909380 | A | 0   | 0      | C |
| 25 | BICF2P1303288           | 8920121 | G | 0   | 0      | A |
| 25 | BICF2P1322084           | 8925569 | C | 0   | 0      | A |
| 25 | BICF2S23619201          | 8939406 | A | 0   | 0      | G |
| 25 | BICF2P413357            | 8954083 | A | 0   | 0      | G |
| 25 | BICF2P1143586           | 8960305 | 0 | 0   | 0      | C |
| 25 | BICF2S22940709          | 8980179 | A | 0   | 0      | G |
| 25 | BICF2S23345102          | 8982378 | A | 0   | 0      | G |
| 25 | BICF2S23625747          | 9004285 | A | 0   | 0      | G |
| 25 | BICF2P590946            | 9012526 | G | 0   | 0      | A |
| 25 | BICF2S22920197          | 9024070 | G | 0   | 0      | A |
| 25 | BICF2P130110            | 9032872 | 0 | 0   | 0      | A |
| 25 | BICF2S23657143          | 9105395 | 0 | 0   | 0      | A |
| 25 | BICF2P669023            | 9110548 | C | 0   | 0      | A |
| 25 | G1282f26S135            | 9127036 | A | 1   | 1      | G |
| 25 | BICF2P1090386           | 9153092 | 0 | 0   | 0      | G |
| 25 | BICF2P607551            | 9161387 | 0 | 0   | 0      | A |
| 25 | BICF2P1286673           | 9167189 | 0 | 0   | 0      | A |
| 25 | BICF2P1339950           | 9183433 | G | 0   | 0      | A |
| 25 | BICF2S2295985           | 9198009 | G | 1   | 1      | A |
| 25 | BICF2P312504            | 9216991 | 0 | 0   | 0      | A |
| 25 | BICF2S23761322          | 9230351 | G | 1   | 1      | A |
| 25 | BICF2S23051911          | 9254245 | A | 1   | 1      | G |
| 25 | BICF2S23612373          | 9267804 | A | 0   | 0      | G |
| 25 | BICF2S23620737          | 9272209 | 0 | 0   | 0      | A |
| 25 | BICF2P1408155           | 9302907 | A | 0.5 | 0.4286 | G |
| 25 | BICF2S23516087          | 9321459 | A | 0.5 | 0.4286 | T |
| 25 | BICF2S23043848          | 9358151 | A | 0.5 | 0.4286 | C |
| 25 | BICF2P1191835           | 9375742 | G | 0.5 | 0.4167 | A |
| 25 | TIGRP2P336489_rs9254950 | 9386499 | A | 0   | 0      | C |
| 25 | BICF2P1108942           | 9410436 | A | 0   | 0      | G |
| 25 | TIGRP2P336506_rs9011718 | 9432754 | G | 0   | 0      | A |
| 25 | BICF2P1086801           | 9449851 | G | 0   | 0      | A |
| 25 | BICF2P533909            | 9458054 | A | 0   | 0      | G |
| 25 | BICF2S23524323          | 9483406 | A | 0.5 | 0.4286 | G |
| 25 | BICF2S23055043          | 9497340 | G | 0.5 | 0.4286 | A |
| 25 | BICF2S23055134          | 9499873 | G | 0   | 0      | A |
| 25 | BICF2S23336011          | 9525423 | A | 0.5 | 0.4286 | C |
| 25 | TIGRP2P336533_rs8751386 | 9539929 | A | 0.5 | 0.5714 | G |
| 25 | TIGRP2P336535_rs8757679 | 9548923 | 0 | 0   | 0      | G |

|    |                         |          |   |     |        |   |
|----|-------------------------|----------|---|-----|--------|---|
| 25 | BICF2G630470672         | 9566528  | A | 0   | 0      | T |
| 25 | BICF2S23011468          | 9568442  | A | 1   | 1      | G |
| 25 | BICF2G630470629         | 9589284  | A | 1   | 1      | G |
| 25 | BICF2G630470626         | 9593124  | C | 1   | 1      | A |
| 25 | BICF2G630470610         | 9609131  | A | 0   | 0      | G |
| 25 | BICF2G630470591         | 9620966  | G | 0   | 0      | A |
| 25 | BICF2G630470579         | 9629126  | A | 0   | 0      | G |
| 25 | BICF2G630470566         | 9643474  | G | 0.5 | 0.4286 | A |
| 25 | BICF2G630470554         | 9650871  | A | 0.5 | 0.4286 | G |
| 25 | BICF2S2369276           | 9715831  | A | 0   | 0      | G |
| 25 | G1283f54S184            | 9740779  | 0 | 0   | 0      | C |
| 25 | BICF2P124538            | 9788679  | 0 | 0   | 0      | G |
| 25 | BICF2S2295984           | 9804447  | C | 0   | 0      | A |
| 25 | BICF2G630470547         | 9819870  | G | 0   | 0      | C |
| 25 | BICF2P113999            | 9830934  | 0 | 0   | 0      | A |
| 25 | BICF2G630470546         | 9833933  | G | 0.5 | 0.4286 | C |
| 25 | BICF2S2313988           | 9848364  | A | 0.5 | 0.4286 | G |
| 25 | BICF2G630470543         | 9866308  | G | 0.5 | 0.4286 | A |
| 25 | BICF2G630470525         | 9881031  | C | 0   | 0      | A |
| 25 | BICF2G630470520         | 9891240  | A | 1   | 1      | G |
| 25 | BICF2G630470513         | 9921770  | G | 1   | 1      | A |
| 25 | BICF2P376062            | 9932076  | A | 0   | 0      | T |
| 25 | BICF2G630470497         | 9946798  | A | 1   | 1      | G |
| 25 | BICF2P988044            | 9957905  | A | 0   | 0      | G |
| 25 | BICF2P351486            | 9961804  | T | 0   | 0      | A |
| 25 | BICF2P1334483           | 9973320  | 0 | 0   | 0      | T |
| 25 | BICF2P759227            | 9983318  | 0 | 0   | 0      | C |
| 25 | BICF2P921904            | 9996519  | 0 | 0   | 0      | A |
| 25 | BICF2P729742            | 10038577 | 0 | 0   | 0      | C |
| 25 | BICF2G630470487         | 10054528 | G | 0.5 | 0.5714 | A |
| 25 | BICF2P915887            | 10072359 | C | 0.5 | 0.5714 | A |
| 25 | BICF2G630470473         | 10082915 | A | 0   | 0      | G |
| 25 | BICF2P1395632           | 10093241 | G | 0.5 | 0.5714 | A |
| 25 | BICF2G630470464         | 10094864 | G | 0.5 | 0.5714 | A |
| 25 | BICF2P383328            | 10098128 | A | 0.5 | 0.5714 | G |
| 25 | BICF2G630470455         | 10098151 | A | 0   | 0      | G |
| 25 | BICF2G630470425         | 10129255 | A | 0   | 0      | G |
| 25 | BICF2S23727949          | 10134429 | G | 0   | 0      | A |
| 25 | BICF2G630470412         | 10144813 | A | 0.5 | 0.5714 | G |
| 25 | BICF2G630470387         | 10160224 | A | 0   | 0      | G |
| 25 | BICF2P1344621           | 10176521 | A | 0   | 0      | G |
| 25 | TIGRP2P324048_rs8851640 | 10183068 | G | 0.5 | 0.5714 | A |
| 25 | BICF2G630470376         | 10193076 | A | 0   | 0      | G |
| 25 | BICF2P504596            | 10218285 | G | 0   | 0      | A |
| 25 | BICF2P1106986           | 10227774 | A | 0   | 0      | G |
| 25 | TIGRP2P324067_rs8698965 | 10241280 | G | 0   | 0      | A |
| 25 | BICF2P439876            | 10250474 | G | 0   | 0      | A |

|    |                         |          |   |     |        |   |
|----|-------------------------|----------|---|-----|--------|---|
| 25 | BICF2G630470375         | 10259069 | A | 0   | 0      | G |
| 25 | TIGRP2P324073_rs8871003 | 10271700 | A | 0   | 0      | G |
| 25 | BICF2P761551            | 10290097 | G | 0   | 0      | A |
| 25 | BICF2P701656            | 10294429 | A | 0   | 0      | G |
| 25 | TIGRP2P324077_rs8788643 | 10298712 | A | 1   | 1      | G |
| 25 | BICF2P1265108           | 10313193 | G | 0   | 0      | A |
| 25 | TIGRP2P324091_rs8823594 | 10336946 | G | 0   | 0      | A |
| 25 | BICF2P270218            | 10339456 | G | 0   | 0      | A |
| 25 | BICF2G630470350         | 10359862 | C | 0   | 0      | A |
| 25 | BICF2G630470347         | 10362326 | A | 0   | 0      | G |
| 25 | BICF2G630470320         | 10387880 | A | 0   | 0      | T |
| 25 | BICF2G630470312         | 10399713 | 0 | 0   | 0      | C |
| 25 | BICF2S23329743          | 10412341 | A | 0   | 0      | G |
| 25 | BICF2P1137348           | 10429244 | G | 1   | 1      | A |
| 25 | BICF2G630470302         | 10432203 | 0 | 0   | 0      | C |
| 25 | BICF2G630470294         | 10443760 | 0 | 0   | 0      | A |
| 25 | BICF2G630470288         | 10458152 | 0 | 0   | 0      | A |
| 25 | BICF2P1451652           | 10480817 | G | 0   | 0      | A |
| 25 | TIGRP2P324121_rs8489570 | 10492256 | A | 0   | 0      | C |
| 25 | BICF2G630470268         | 10509945 | 0 | 0   | 0      | G |
| 25 | BICF2P1053280           | 10517500 | G | 0   | 0      | A |
| 25 | BICF2G630470256         | 10528910 | 0 | 0   | 0      | G |
| 25 | BICF2G630470254         | 10535404 | 0 | 0   | 0      | G |
| 25 | BICF2G630470249         | 10546954 | 0 | 0   | 0      | A |
| 25 | BICF2S23341099          | 10563563 | C | 0   | 0      | A |
| 25 | TIGRP2P324128_rs8836758 | 10573983 | A | 0   | 0      | G |
| 25 | TIGRP2P324144_rs8732899 | 10594374 | A | 0   | 0      | G |
| 25 | BICF2G630470232         | 10607038 | G | 0.5 | 0.4286 | A |
| 25 | TIGRP2P324151_rs8810475 | 10617741 | A | 0.5 | 0.4286 | G |
| 25 | BICF2G630470222         | 10646204 | A | 0.5 | 0.4286 | G |
| 25 | BICF2G630470219         | 10655818 | G | 0.5 | 0.4286 | A |
| 25 | BICF2G630470216         | 10671611 | 0 | 0   | 0      | A |
| 25 | BICF2G630470215         | 10673312 | 0 | 0   | 0      | G |
| 25 | TIGRP2P324156_rs8837342 | 10686362 | A | 0   | 0      | C |
| 25 | TIGRP2P324160_rs8700014 | 10708143 | 0 | 0   | 0      | G |
| 25 | BICF2G630470214         | 10729442 | 0 | 0   | 0      | C |
| 25 | TIGRP2P324166_rs8676219 | 10757887 | G | 0   | 0      | A |
| 25 | BICF2P918004            | 10771796 | G | 0   | 0      | A |
| 25 | BICF2G630470212         | 10777791 | C | 0   | 0      | A |
| 25 | BICF2G630470206         | 10787846 | C | 0   | 0      | A |
| 25 | BICF2G630470192         | 10802614 | G | 0   | 0      | A |
| 25 | BICF2G630470181         | 10818706 | G | 0   | 0      | A |
| 25 | BICF2G630470170         | 10830684 | A | 0   | 0      | G |
| 25 | BICF2G630470164         | 10837742 | G | 0   | 0      | A |
| 25 | BICF2G630470141         | 10847528 | A | 0   | 0      | G |
| 25 | BICF2G630470134         | 10856776 | A | 0   | 0      | G |
| 25 | BICF2G630470124         | 10864302 | A | 0   | 0      | C |

|    |                         |          |   |     |        |   |
|----|-------------------------|----------|---|-----|--------|---|
| 25 | BICF2G630470119         | 10870569 | G | 0   | 0      | A |
| 25 | BICF2G630470104         | 10882679 | G | 0   | 0      | A |
| 25 | BICF2G630470093         | 10893218 | C | 0   | 0      | A |
| 25 | BICF2S22914836          | 10907021 | G | 0   | 0      | A |
| 25 | BICF2P428899            | 10931766 | C | 0.5 | 0.5714 | G |
| 25 | BICF2G630470070         | 10939178 | A | 0   | 0      | G |
| 25 | BICF2G630470068         | 10948136 | G | 0   | 0      | A |
| 25 | BICF2G630470058         | 10965685 | G | 0   | 0      | A |
| 25 | BICF2G630470043         | 10986283 | G | 0   | 0      | A |
| 25 | BICF2G630470039         | 11001872 | G | 0   | 0      | A |
| 25 | TIGRP2P324190_rs9129405 | 11008624 | A | 0   | 0      | G |
| 25 | BICF2G630470025         | 11023742 | A | 0   | 0      | G |
| 25 | BICF2P917482            | 11029511 | A | 0   | 0      | C |
| 25 | BICF2P399961            | 11047756 | A | 0   | 0      | G |
| 25 | BICF2G630470013         | 11051524 | A | 1   | 1      | T |
| 25 | TIGRP2P324205_rs8949416 | 11065113 | C | 0.5 | 0.5714 | A |
| 25 | BICF2G630469987         | 11087815 | A | 0   | 0      | G |
| 25 | BICF2G630469971         | 11101939 | A | 0.5 | 0.4286 | G |
| 25 | BICF2G630469952         | 11119747 | G | 0.5 | 0.4286 | A |
| 25 | BICF2G630469945         | 11129733 | A | 0.5 | 0.4286 | C |
| 25 | TIGRP2P324215_rs8536822 | 11143370 | G | 0.5 | 0.5714 | A |
| 25 | BICF2S2302015           | 11149792 | A | 0.5 | 0.4286 | G |
| 25 | BICF2G630469931         | 11155289 | A | 0.5 | 0.5714 | G |
| 25 | BICF2G630469913         | 11167905 | A | 0   | 0      | G |
| 25 | BICF2G630469885         | 11181083 | G | 0   | 0      | A |
| 25 | BICF2G630469872         | 11193335 | G | 0.5 | 0.5714 | A |
| 25 | BICF2G630469860         | 11208657 | G | 0.5 | 0.5714 | A |
| 25 | BICF2S23158159          | 11209313 | A | 0.5 | 0.5833 | G |
| 25 | BICF2S23158194          | 11213538 | A | 0.5 | 0.5714 | G |
| 25 | BICF2G630469853         | 11218502 | G | 0.5 | 0.5714 | A |
| 25 | BICF2G630469845         | 11230072 | G | 0   | 0      | A |
| 25 | BICF2G630469841         | 11239673 | A | 0.5 | 0.4286 | G |
| 25 | BICF2G630469838         | 11247075 | A | 0   | 0      | G |
| 25 | BICF2P763263            | 11263477 | 0 | 0   | 0      | A |
| 25 | BICF2P611859            | 11270073 | 0 | 0   | 0      | A |
| 25 | BICF2P727494            | 11293074 | T | 0   | 0      | A |
| 25 | BICF2G630469821         | 11305492 | A | 0   | 0      | G |
| 25 | BICF2S23649896          | 11321561 | 0 | 0   | 0      | A |
| 25 | BICF2G630469810         | 11333576 | A | 0   | 0      | G |
| 25 | BICF2G630469801         | 11350375 | A | 0   | 0      | C |
| 25 | BICF2G630469793         | 11353258 | A | 0   | 0      | G |
| 25 | BICF2P575531            | 11366350 | G | 0.5 | 0.5714 | A |
| 25 | BICF2G630469768         | 11377792 | G | 0.5 | 0.5714 | A |
| 25 | BICF2G630469760         | 11384993 | A | 0   | 0      | C |
| 25 | BICF2G630469756         | 11385883 | G | 0   | 0      | A |
| 25 | BICF2G630469726         | 11407569 | G | 0   | 0      | C |
| 25 | BICF2G630469724         | 11412761 | A | 0   | 0      | C |

|    |                         |          |   |     |        |   |
|----|-------------------------|----------|---|-----|--------|---|
| 25 | BICF2G630469717         | 11420574 | A | 0   | 0      | C |
| 25 | BICF2P499982            | 11441841 | G | 0   | 0      | C |
| 25 | BICF2P1417710           | 11480314 | G | 0   | 0      | A |
| 25 | BICF2P1266977           | 11490744 | A | 0   | 0      | G |
| 25 | BICF2P1151640           | 11506899 | A | 0   | 0      | G |
| 25 | BICF2S23246603          | 11513261 | C | 0   | 0      | A |
| 25 | BICF2P982326            | 11523797 | A | 0   | 0      | G |
| 25 | BICF2P982327            | 11524125 | C | 0   | 0      | A |
| 25 | BICF2S23628837          | 11538150 | 0 | 0   | 0      | G |
| 25 | BICF2S2316094           | 11548703 | 0 | 0   | 0      | C |
| 25 | BICF2G630469691         | 11562071 | C | 0.5 | 0.5714 | A |
| 25 | BICF2S23060484          | 11570990 | A | 0   | 0      | G |
| 25 | BICF2P1028987           | 11583265 | A | 0   | 0      | C |
| 25 | BICF2P842229            | 11591319 | A | 0   | 0      | G |
| 25 | BICF2G630469688         | 11603054 | 0 | 0   | 0      | G |
| 25 | BICF2P1173318           | 11622029 | G | 0.5 | 0.5714 | A |
| 25 | BICF2P850211            | 11627936 | G | 0   | 0      | A |
| 25 | BICF2P367901            | 11655030 | A | 0.5 | 0.5714 | G |
| 25 | BICF2P598596            | 11661185 | A | 0   | 0      | G |
| 25 | BICF2P1147693           | 11685307 | G | 0.5 | 0.5714 | A |
| 25 | TIGRP2P324350_rs8774750 | 11697692 | C | 0   | 0      | A |
| 25 | BICF2P901705            | 11726528 | A | 0   | 0      | G |
| 25 | BICF2G630469687         | 11728686 | 0 | 0   | 0      | G |
| 25 | BICF2G630469686         | 11733135 | G | 0   | 0      | A |
| 25 | TIGRP2P324367_rs8724432 | 11748528 | A | 0   | 0      | G |
| 25 | TIGRP2P324369_rs9091302 | 11757378 | G | 0   | 0      | A |
| 25 | BICF2P380456            | 11773146 | G | 0   | 0      | A |
| 25 | BICF2P93106             | 11786897 | A | 0   | 0      | G |
| 25 | BICF2P1368741           | 11793979 | A | 0   | 0      | C |
| 25 | BICF2P1293705           | 11803143 | C | 0   | 0      | A |
| 25 | BICF2S23626625          | 11821186 | C | 0   | 0      | G |
| 25 | BICF2P65472             | 11829458 | A | 0   | 0      | G |
| 25 | BICF2P1306317           | 11849538 | G | 0   | 0      | A |
| 25 | BICF2S23529094          | 11885348 | A | 0   | 0      | G |
| 25 | BICF2P562464            | 11893306 | 0 | 0   | 0      | G |
| 25 | BICF2G630469683         | 11912582 | 0 | 0   | 0      | G |
| 25 | BICF2S23232437          | 11918373 | A | 0   | 0      | G |
| 25 | BICF2P179659            | 11946372 | G | 1   | 1      | A |
| 25 | BICF2P1352026           | 11948579 | A | 0.5 | 0.4286 | G |
| 25 | TIGRP2P324381_rs9021222 | 11970029 | 0 | 0   | 0      | A |
| 25 | G1284f54S263            | 11977687 | G | 0   | 0      | A |
| 25 | BICF2S2453461           | 11984880 | 0 | 0   | 0      | A |
| 25 | BICF2P1386053           | 11997892 | G | 0.5 | 0.5714 | A |
| 25 | BICF2G630469682         | 12006086 | 0 | 0   | 0      | G |
| 25 | BICF2G630469681         | 12022787 | 0 | 0   | 0      | G |
| 25 | BICF2P104834            | 12048273 | G | 0.5 | 0.5714 | A |
| 25 | BICF2P607052            | 12055148 | G | 0.5 | 0.5714 | A |

|    |                         |          |   |     |        |   |
|----|-------------------------|----------|---|-----|--------|---|
| 25 | BICF2P635083            | 12057586 | A | 0   | 0      | G |
| 25 | BICF2P342349            | 12064978 | A | 0.5 | 0.5714 | G |
| 25 | TIGRP2P324408_rs9009834 | 12085296 | A | 0   | 0      | G |
| 25 | TIGRP2P324413_rs8916192 | 12090409 | A | 0.5 | 0.4286 | G |
| 25 | BICF2P494057            | 12100937 | G | 0.5 | 0.5714 | A |
| 25 | BICF2P734262            | 12118443 | G | 0   | 0      | A |
| 25 | BICF2P674474            | 12126462 | G | 0.5 | 0.4286 | A |
| 25 | BICF2S2325627           | 12137589 | G | 0.5 | 0.4286 | A |
| 25 | BICF2P1267724           | 12152238 | A | 0   | 0      | G |
| 25 | TIGRP2P324435_rs8801577 | 12164736 | A | 0   | 0      | C |
| 25 | BICF2G630469678         | 12174807 | G | 0.5 | 0.4286 | A |
| 25 | BICF2P253782            | 12185163 | G | 0.5 | 0.4286 | A |
| 25 | BICF2P1442725           | 12194314 | 0 | 0   | 0      | C |
| 25 | TIGRP2P324444_rs9096681 | 12201757 | G | 0   | 0      | A |
| 25 | BICF2P1173515           | 12213189 | G | 1   | 1      | A |
| 25 | BICF2P854153            | 12233215 | A | 0   | 0      | G |
| 25 | BICF2G630469674         | 12254039 | G | 0   | 0      | A |
| 25 | TIGRP2P324455_rs9163328 | 12260095 | G | 0   | 0      | A |
| 25 | TIGRP2P324461_rs8815018 | 12271967 | G | 0   | 0      | A |
| 25 | BICF2P229447            | 12278666 | G | 0   | 0      | C |
| 25 | BICF2P86620             | 12293478 | A | 0   | 0      | C |
| 25 | BICF2P935008            | 12300160 | G | 1   | 1      | A |
| 25 | BICF2P64939             | 12307783 | A | 0   | 0      | T |
| 25 | BICF2P862027            | 12330476 | A | 0.5 | 0.5714 | G |
| 25 | BICF2G630469670         | 12336538 | G | 0.5 | 0.5714 | A |
| 25 | BICF2G630469648         | 12347843 | A | 0   | 0      | G |
| 25 | BICF2G630469644         | 12355563 | A | 0   | 0      | G |
| 25 | BICF2G630469628         | 12368661 | A | 0   | 0      | G |
| 25 | BICF2G630469619         | 12376247 | A | 0   | 0      | G |
| 25 | BICF2P580942            | 12416968 | C | 0   | 0      | A |
| 25 | BICF2G630469569         | 12426369 | G | 0   | 0      | A |
| 25 | BICF2P446703            | 12442176 | 0 | 0   | 0      | T |
| 25 | BICF2G630469554         | 12445041 | G | 0   | 0      | A |
| 25 | BICF2G630469545         | 12462274 | C | 0   | 0      | A |
| 25 | BICF2G630469543         | 12470370 | A | 0   | 0      | G |
| 25 | BICF2G630469518         | 12490855 | A | 0   | 0      | G |
| 25 | BICF2G630469510         | 12505619 | 0 | 0   | 0      | A |
| 25 | BICF2G630469498         | 12512635 | A | 0.5 | 0.5714 | C |
| 25 | BICF2G630469493         | 12530257 | G | 0   | 0      | A |
| 25 | BICF2G630469490         | 12536412 | A | 0   | 0      | C |
| 25 | BICF2P1415285           | 12578596 | G | 0.5 | 0.4286 | A |
| 25 | BICF2G630469464         | 12595534 | G | 0.5 | 0.4286 | A |
| 25 | BICF2G630469458         | 12604829 | G | 1   | 1      | A |
| 25 | BICF2G630469451         | 12617191 | A | 0   | 0      | G |
| 25 | BICF2G630469436         | 12628087 | G | 1   | 1      | A |
| 25 | BICF2G630469415         | 12649578 | A | 1   | 1      | G |
| 25 | BICF2G630469408         | 12651027 | G | 1   | 1      | A |

|    |                         |          |   |     |        |   |
|----|-------------------------|----------|---|-----|--------|---|
| 25 | BICF2G630469377         | 12665425 | A | 0   | 0      | G |
| 25 | BICF2S23016021          | 12676376 | A | 0   | 0      | G |
| 25 | BICF2P358052            | 12698204 | A | 0.5 | 0.4286 | G |
| 25 | BICF2G630469339         | 12711940 | A | 0   | 0      | G |
| 25 | BICF2G630469323         | 12730235 | A | 0   | 0      | G |
| 25 | BICF2G630469319         | 12740510 | G | 0.5 | 0.5714 | A |
| 25 | BICF2G630469315         | 12752901 | A | 0   | 0      | G |
| 25 | BICF2G630469312         | 12760134 | A | 0   | 0      | G |
| 25 | BICF2G630469296         | 12769882 | C | 0   | 0      | A |
| 25 | BICF2G630469292         | 12778407 | A | 0.5 | 0.5714 | G |
| 25 | BICF2G630469270         | 12811877 | A | 0   | 0      | G |
| 25 | BICF2G630469260         | 12823596 | A | 0   | 0      | G |
| 25 | BICF2G630469248         | 12839764 | 0 | 0   | 0      | T |
| 25 | BICF2G630469241         | 12879194 | G | 0   | 0      | A |
| 25 | BICF2G630469238         | 12880009 | A | 0   | 0      | G |
| 25 | TIGRP2P324540_rs9182364 | 12892776 | A | 0.5 | 0.5714 | G |
| 25 | BICF2P430298            | 12914431 | A | 0   | 0      | G |
| 25 | BICF2G630469195         | 12917997 | A | 0   | 0      | G |
| 25 | BICF2G630469182         | 12925597 | A | 0.5 | 0.5714 | G |
| 25 | BICF2G630469178         | 12927970 | A | 0.5 | 0.5714 | G |
| 25 | BICF2G630469171         | 12937692 | A | 0   | 0      | C |
| 25 | BICF2P1153495           | 12955749 | A | 0   | 0      | G |
| 25 | TIGRP2P324566_rs8996466 | 12963235 | A | 0   | 0      | G |
| 25 | BICF2G630469148         | 12983181 | A | 0   | 0      | C |
| 25 | BICF2S2363834           | 12992984 | G | 0   | 0      | A |
| 25 | BICF2G630469144         | 12997472 | A | 0.5 | 0.5714 | G |
| 25 | TIGRP2P324573_rs9009298 | 13008083 | A | 0   | 0      | G |
| 25 | BICF2G630469131         | 13019612 | A | 0   | 0      | G |
| 25 | BICF2G630469114         | 13024074 | A | 0   | 0      | G |
| 25 | TIGRP2P324583_rs9234191 | 13025525 | G | 0   | 0      | A |
| 25 | BICF2G630469092         | 13049790 | A | 1   | 1      | G |
| 25 | BICF2P998945            | 13053761 | A | 1   | 1      | G |
| 25 | BICF2P991198            | 13067599 | 0 | 0   | 0      | A |
| 25 | BICF2G630469072         | 13077688 | A | 0   | 0      | G |
| 25 | BICF2P1010739           | 13089161 | C | 1   | 1      | A |
| 25 | BICF2P696280            | 13102318 | A | 0   | 0      | G |
| 25 | BICF2G630469056         | 13118310 | T | 0.5 | 0.5714 | A |
| 25 | BICF2P1115893           | 13131489 | G | 0   | 0      | A |
| 25 | BICF2P157733            | 13134465 | T | 0   | 0      | A |
| 25 | BICF2G630469048         | 13163663 | G | 0.5 | 0.5714 | A |
| 25 | BICF2G630469038         | 13171675 | G | 0.5 | 0.4286 | A |
| 25 | BICF2G630469010         | 13179564 | A | 0.5 | 0.4286 | C |
| 25 | BICF2P1087163           | 13194458 | A | 0.5 | 0.5714 | G |
| 25 | BICF2G630469000         | 13194541 | G | 0.5 | 0.5714 | A |
| 25 | BICF2G630468991         | 13204284 | A | 0   | 0      | G |
| 25 | BICF2G630468986         | 13215087 | A | 1   | 1      | G |
| 25 | BICF2P29454             | 13229804 | A | 1   | 1      | G |



|    |                         |          |   |     |        |   |
|----|-------------------------|----------|---|-----|--------|---|
| 25 | BICF2S22940260          | 13243984 | G | 1   | 1      | A |
| 25 | BICF2P539503            | 13249991 | A | 1   | 1      | G |
| 25 | BICF2S22965090          | 13254460 | A | 0.5 | 0.4286 | G |
| 25 | BICF2P1262815           | 13259815 | A | 1   | 1      | G |
| 25 | BICF2G630468969         | 13282199 | A | 0.5 | 0.5714 | C |
| 25 | BICF2G630468961         | 13289310 | C | 0   | 0      | A |
| 25 | BICF2G630468949         | 13296868 | A | 0.5 | 0.5714 | G |
| 25 | BICF2G630468941         | 13310896 | 0 | 0   | 0      | T |
| 25 | BICF2G630468937         | 13314549 | A | 0   | 0      | T |
| 25 | BICF2G630468935         | 13315672 | A | 0.5 | 0.5714 | T |
| 25 | BICF2G630468933         | 13317455 | C | 0.5 | 0.5714 | A |
| 25 | BICF2G630468922         | 13331425 | G | 0.5 | 0.5714 | A |
| 25 | BICF2G630468900         | 13355443 | A | 0.5 | 0.5714 | G |
| 25 | BICF2P107682            | 13366502 | T | 0.5 | 0.4286 | A |
| 25 | BICF2G630468888         | 13375576 | A | 0.5 | 0.4286 | G |
| 25 | BICF2G630468856         | 13393736 | A | 0   | 0      | G |
| 25 | BICF2G630468845         | 13404329 | 0 | 0   | 0      | A |
| 25 | BICF2G630468835         | 13420120 | 0 | 0   | 0      | C |
| 25 | BICF2G630468834         | 13420998 | G | 0   | 0      | A |
| 25 | BICF2G630468819         | 13432244 | 0 | 0   | 0      | G |
| 25 | BICF2G630468798         | 13452463 | A | 0.5 | 0.4286 | G |
| 25 | BICF2G630468790         | 13455486 | G | 0.5 | 0.4286 | A |
| 25 | BICF2P485354            | 13469369 | T | 0   | 0      | A |
| 25 | BICF2G630468758         | 13488076 | A | 0.5 | 0.4286 | G |
| 25 | BICF2S23723039          | 13496167 | G | 0   | 0      | A |
| 25 | BICF2G630468746         | 13502725 | 0 | 0   | 0      | G |
| 25 | BICF2G630468725         | 13516153 | 0 | 0   | 0      | G |
| 25 | BICF2G630468709         | 13531221 | G | 0.5 | 0.4286 | A |
| 25 | BICF2G630468689         | 13546772 | A | 0.5 | 0.4286 | T |
| 25 | BICF2G630468680         | 13552400 | A | 0.5 | 0.4286 | C |
| 25 | BICF2G630468675         | 13561195 | A | 0.5 | 0.4286 | G |
| 25 | BICF2G630468656         | 13568548 | A | 0.5 | 0.4167 | C |
| 25 | BICF2G630468642         | 13571808 | A | 0.5 | 0.4286 | C |
| 25 | BICF2G630468634         | 13576126 | G | 0.5 | 0.4286 | A |
| 25 | BICF2G630468607         | 13601314 | T | 0.5 | 0.4286 | A |
| 25 | BICF2G630468605         | 13602659 | A | 0.5 | 0.4286 | G |
| 25 | BICF2G630468596         | 13612371 | G | 0.5 | 0.4286 | A |
| 25 | BICF2P265840            | 13632828 | A | 0   | 0      | C |
| 25 | BICF2G630468561         | 13641219 | A | 0.5 | 0.4286 | G |
| 25 | BICF2P1457107           | 13666544 | 0 | 0   | 0      | A |
| 25 | TIGRP2P324702_rs8743390 | 13675930 | G | 0   | 0      | A |
| 25 | BICF2P1045640           | 13686072 | G | 0   | 0      | A |
| 25 | G1285f26S258            | 13713231 | 0 | 0   | 0      | C |
| 25 | BICF2G630468547         | 13739473 | G | 0   | 0      | A |
| 25 | BICF2S23055765          | 13748653 | A | 0   | 0      | G |
| 25 | BICF2S23114860          | 13765862 | G | 0   | 0      | A |
| 25 | BICF2G630468545         | 13780904 | C | 0   | 0      | A |

|    |                         |          |   |     |        |   |
|----|-------------------------|----------|---|-----|--------|---|
| 25 | BICF2G630468544         | 13795932 | A | 0   | 0      | G |
| 25 | BICF2P1385550           | 13817825 | 0 | 0   | 0      | G |
| 25 | BICF2G630468541         | 13827982 | G | 0   | 0      | A |
| 25 | BICF2G630468526         | 13845073 | A | 0   | 0      | G |
| 25 | BICF2G630468496         | 13857037 | A | 0   | 0      | T |
| 25 | BICF2G630468472         | 13866718 | A | 0   | 0      | C |
| 25 | BICF2G630468466         | 13869249 | A | 0   | 0      | G |
| 25 | BICF2G630468461         | 13881989 | G | 0   | 0      | A |
| 25 | BICF2G630468447         | 13896647 | C | 0   | 0      | A |
| 25 | BICF2G630468427         | 13903575 | A | 0   | 0      | G |
| 25 | BICF2G630468402         | 13925536 | T | 0   | 0      | A |
| 25 | BICF2G630468393         | 13929604 | G | 0   | 0      | A |
| 25 | BICF2G630468377         | 13939912 | A | 1   | 1      | G |
| 25 | BICF2P1154587           | 13960230 | A | 1   | 1      | G |
| 25 | BICF2G630468364         | 13966925 | A | 1   | 1      | G |
| 25 | BICF2G630468353         | 13970913 | G | 1   | 1      | A |
| 25 | BICF2G630468345         | 13975580 | G | 1   | 1      | A |
| 25 | BICF2G630468305         | 13987487 | A | 1   | 1      | G |
| 25 | BICF2G630468286         | 14002508 | C | 0   | 0      | A |
| 25 | BICF2G630468265         | 14007459 | G | 1   | 1      | A |
| 25 | BICF2G630468263         | 14036907 | G | 0   | 0      | A |
| 25 | BICF2P609662            | 14064362 | 0 | 0   | 0      | G |
| 25 | BICF2G630468259         | 14071172 | A | 0   | 0      | G |
| 25 | BICF2S23916178          | 14084245 | G | 0   | 0      | A |
| 25 | BICF2G630468255         | 14092166 | C | 0   | 0      | A |
| 25 | BICF2G630468253         | 14099478 | A | 0   | 0      | G |
| 25 | BICF2G630468249         | 14121874 | A | 0   | 0      | G |
| 25 | BICF2S23413740          | 14129546 | A | 0   | 0      | G |
| 25 | BICF2G630468233         | 14138394 | A | 0   | 0      | G |
| 25 | BICF2G630468226         | 14145237 | A | 0   | 0      | C |
| 25 | BICF2S23437827          | 14166896 | A | 0   | 0      | G |
| 25 | BICF2G630468170         | 14169314 | C | 0   | 0      | A |
| 25 | BICF2G630468137         | 14189652 | G | 0   | 0      | A |
| 25 | BICF2G630468130         | 14201627 | A | 0   | 0      | C |
| 25 | BICF2P862004            | 14211253 | C | 0   | 0      | A |
| 25 | BICF2G630468122         | 14217507 | A | 0   | 0      | C |
| 25 | BICF2G630468120         | 14226910 | G | 0   | 0      | A |
| 25 | BICF2G630468116         | 14244273 | A | 0.5 | 0.4286 | G |
| 25 | BICF2P833934            | 14253477 | A | 0.5 | 0.4286 | C |
| 25 | BICF2P302907            | 14268927 | A | 0.5 | 0.4286 | G |
| 25 | BICF2P1423759           | 14272060 | A | 0.5 | 0.4286 | C |
| 25 | TIGRP2P324759_rs8642464 | 14284856 | G | 0.5 | 0.4286 | A |
| 25 | BICF2G630468107         | 14296878 | A | 0   | 0      | G |
| 25 | BICF2P995800            | 14307233 | 0 | 0   | 0      | G |
| 25 | TIGRP2P324763_rs8994971 | 14322734 | 0 | 0   | 0      | G |
| 25 | BICF2P424705            | 14331811 | G | 0   | 0      | A |
| 25 | BICF2S23432367          | 14343986 | A | 0.5 | 0.4286 | C |

|    |                         |          |   |     |        |   |
|----|-------------------------|----------|---|-----|--------|---|
| 25 | BICF2P172910            | 14361994 | 0 | 0   | 0      | A |
| 25 | BICF2G630468105         | 14367153 | A | 0.5 | 0.4286 | G |
| 25 | BICF2S23629448          | 14380099 | A | 0   | 0      | G |
| 25 | BICF2G630468091         | 14383927 | G | 0.5 | 0.4286 | A |
| 25 | BICF2S24320631          | 14391930 | A | 0   | 0      | G |
| 25 | BICF2P583588            | 14405736 | A | 0.5 | 0.4286 | G |
| 25 | BICF2P999812            | 14431578 | G | 0.5 | 0.4286 | C |
| 25 | BICF2P759746            | 14440336 | 0 | 0   | 0      | A |
| 25 | BICF2G630468074         | 14452926 | A | 0.5 | 0.5714 | T |
| 25 | TIGRP2P324783_rs8607517 | 14460188 | G | 0.5 | 0.4286 | A |
| 25 | BICF2P1307822           | 14470280 | 0 | 0   | 0      | G |
| 25 | TIGRP2P324787_rs8794856 | 14481233 | G | 0.5 | 0.4167 | A |
| 25 | BICF2P750353            | 14493817 | G | 0.5 | 0.4286 | A |
| 25 | BICF2G630468067         | 14506358 | G | 0   | 0      | A |
| 25 | BICF2G630468066         | 14513832 | G | 0.5 | 0.4286 | C |
| 25 | BICF2P80649             | 14536683 | 0 | 0   | 0      | A |
| 25 | BICF2G630468059         | 14547993 | G | 0   | 0      | A |
| 25 | BICF2P1358869           | 14567472 | A | 0   | 0      | G |
| 25 | BICF2G630468028         | 14573438 | A | 0.5 | 0.4286 | C |
| 25 | BICF2G630468026         | 14575839 | A | 0   | 0      | G |
| 25 | TIGRP2P324815_rs9195299 | 14582517 | A | 0.5 | 0.4286 | G |
| 25 | TIGRP2P324820_rs9047242 | 14615742 | C | 0.5 | 0.4286 | A |
| 25 | BICF2S2324709           | 14621581 | G | 0.5 | 0.4286 | A |
| 25 | BICF2G630468009         | 14630490 | A | 0   | 0      | G |
| 25 | BICF2P1339698           | 14640032 | G | 0.5 | 0.4286 | A |
| 25 | BICF2S22963714          | 14661516 | C | 0   | 0      | A |
| 25 | TIGRP2P324832_rs9013428 | 14666859 | A | 0.5 | 0.4286 | G |
| 25 | BICF2G630467933         | 14678374 | G | 0.5 | 0.4286 | A |
| 25 | BICF2G630467924         | 14685523 | G | 0   | 0      | A |
| 25 | BICF2G630467913         | 14704093 | G | 0.5 | 0.4286 | A |
| 25 | BICF2P1210857           | 14714809 | A | 0   | 0      | G |
| 25 | BICF2P1223257           | 14724594 | G | 0.5 | 0.5714 | A |
| 25 | BICF2P942228            | 14735387 | A | 0   | 0      | G |
| 25 | BICF2P266213            | 14750535 | A | 0.5 | 0.4286 | G |
| 25 | BICF2S23026222          | 14758359 | C | 0   | 0      | A |
| 25 | TIGRP2P324870_rs9129189 | 14773599 | G | 0.5 | 0.4286 | A |
| 25 | TIGRP2P324873_rs8915134 | 14787306 | C | 0   | 0      | A |
| 25 | TIGRP2P324877_rs8591064 | 14792801 | A | 0.5 | 0.4286 | G |
| 25 | TIGRP2P324884_rs8774092 | 14806716 | A | 0.5 | 0.4286 | G |
| 25 | BICF2P1088329           | 14820635 | A | 0.5 | 0.5714 | G |
| 25 | BICF2P1051604           | 14827437 | A | 0.5 | 0.5714 | G |
| 25 | BICF2P1055899           | 14836480 | A | 0.5 | 0.5714 | G |
| 25 | BICF2P274379            | 14850439 | A | 0.5 | 0.4286 | G |
| 25 | BICF2P270117            | 14862522 | T | 0   | 0      | A |
| 25 | BICF2P874765            | 14869886 | A | 0   | 0      | C |
| 25 | BICF2S23356407          | 14883074 | 0 | 0   | 0      | G |
| 25 | TIGRP2P324927_rs9007588 | 14899294 | G | 0   | 0      | A |

|    |                         |          |   |     |        |   |
|----|-------------------------|----------|---|-----|--------|---|
| 25 | BICF2G630467863         | 14908335 | G | 0.5 | 0.4286 | A |
| 25 | BICF2P833353            | 14925586 | A | 0   | 0      | T |
| 25 | BICF2G630467826         | 14936656 | T | 0.5 | 0.4286 | A |
| 25 | BICF2G630467800         | 14961459 | G | 0   | 0      | A |
| 25 | BICF2P904356            | 14967418 | C | 0   | 0      | G |
| 25 | BICF2G630467784         | 14973271 | A | 0   | 0      | C |
| 25 | BICF2G630467775         | 14988626 | C | 0.5 | 0.5714 | A |
| 25 | BICF2G630467760         | 15006700 | G | 0.5 | 0.5714 | A |
| 25 | BICF2G630467757         | 15011040 | G | 0.5 | 0.5714 | A |
| 25 | BICF2G630467748         | 15020896 | A | 0.5 | 0.5714 | C |
| 25 | BICF2P987558            | 15039432 | 0 | 0   | 0      | A |
| 25 | BICF2P165886            | 15048707 | 0 | 0   | 0      | G |
| 25 | BICF2G630467728         | 15058957 | A | 0   | 0      | T |
| 25 | BICF2G630467726         | 15067493 | A | 0   | 0      | G |
| 25 | BICF2G630467711         | 15082805 | 0 | 0   | 0      | G |
| 25 | BICF2G630467708         | 15097782 | A | 0.5 | 0.5714 | G |
| 25 | BICF2S23641097          | 15109882 | A | 0.5 | 0.4286 | G |
| 25 | TIGRP2P324957_rs8555158 | 15127163 | G | 0   | 0      | A |
| 25 | BICF2P1072984           | 15143982 | G | 0   | 0      | A |
| 25 | BICF2P928060            | 15154354 | G | 0.5 | 0.4286 | A |
| 25 | BICF2S2366764           | 15156184 | G | 0.5 | 0.4286 | C |
| 25 | BICF2P1319433           | 15159779 | A | 0.5 | 0.4286 | T |
| 25 | BICF2P471910            | 15172132 | G | 0.5 | 0.4167 | A |
| 25 | BICF2P471911            | 15172277 | C | 0.5 | 0.5714 | G |
| 25 | BICF2P224117            | 15189536 | G | 0   | 0      | A |
| 25 | BICF2S22936694          | 15194117 | G | 0.5 | 0.5714 | A |
| 25 | BICF2S23038702          | 15225922 | C | 1   | 1      | A |
| 25 | BICF2P932990            | 15234573 | G | 0.5 | 0.5714 | A |
| 25 | BICF2P1210295           | 15242589 | A | 0.5 | 0.5714 | G |
| 25 | BICF2P729823            | 15250818 | G | 0   | 0      | A |
| 25 | BICF2P1183465           | 15264892 | T | 1   | 1      | A |
| 25 | TIGRP2P325026_rs9197388 | 15276926 | G | 0.5 | 0.5714 | A |
| 25 | BICF2S23728316          | 15287882 | A | 0   | 0      | G |
| 25 | BICF2P41054             | 15301483 | G | 0   | 0      | A |
| 25 | BICF2P766871            | 15320107 | 0 | 0   | 0      | G |
| 25 | TIGRP2P325049_rs8830924 | 15343896 | A | 0   | 0      | G |
| 25 | BICF2P530748            | 15354459 | 0 | 0   | 0      | G |
| 25 | BICF2P789417            | 15367821 | G | 0   | 0      | A |
| 25 | BICF2P736117            | 15379674 | A | 0   | 0      | G |
| 25 | TIGRP2P325059_rs8967668 | 15395593 | G | 0   | 0      | A |
| 25 | BICF2P638042            | 15417354 | G | 0   | 0      | A |
| 25 | TIGRP2P325066_rs8664894 | 15425680 | G | 0   | 0      | A |
| 25 | TIGRP2P325071_rs8732924 | 15436595 | G | 0   | 0      | A |
| 25 | BICF2P157056            | 15446105 | G | 0   | 0      | A |
| 25 | TIGRP2P325076_rs9008299 | 15457668 | C | 0   | 0      | A |
| 25 | BICF2P389757            | 15470977 | A | 0.5 | 0.5714 | G |
| 25 | TIGRP2P325085_rs8529110 | 15486826 | A | 0.5 | 0.5714 | G |

|    |                         |          |   |     |        |   |
|----|-------------------------|----------|---|-----|--------|---|
| 25 | TIGRP2P325091_rs8811349 | 15497137 | A | 0.5 | 0.5714 | C |
| 25 | BICF2P480318            | 15510339 | G | 0.5 | 0.5714 | A |
| 25 | TIGRP2P325107_rs9088133 | 15514430 | A | 0.5 | 0.5714 | G |
| 25 | BICF2S23748686          | 15535460 | G | 0.5 | 0.5714 | A |
| 25 | BICF2P1368543           | 15545067 | C | 0.5 | 0.5714 | A |
| 25 | BICF2P1371165           | 15552670 | G | 0   | 0      | A |
| 25 | BICF2P773910            | 15563293 | G | 1   | 1      | C |
| 25 | BICF2P418308            | 15572909 | A | 1   | 1      | G |
| 25 | BICF2P860388            | 15592405 | G | 1   | 1      | A |
| 25 | BICF2P686991            | 15605085 | G | 1   | 1      | A |
| 25 | BICF2P1167055           | 15608765 | A | 1   | 1      | C |
| 25 | BICF2P1167049           | 15609169 | G | 1   | 1      | A |
| 25 | BICF2P1167043           | 15609495 | A | 1   | 1      | G |
| 25 | BICF2S23215198          | 15626246 | A | 0.5 | 0.5714 | G |
| 25 | BICF2P436610            | 15637551 | A | 0.5 | 0.5714 | G |
| 25 | BICF2P280420            | 15656073 | A | 0.5 | 0.5714 | G |
| 25 | BICF2P1014344           | 15673486 | G | 1   | 1      | A |
| 25 | BICF2P872673            | 15674690 | C | 1   | 1      | A |
| 25 | BICF2P747455            | 15697042 | G | 0.5 | 0.4286 | A |
| 25 | BICF2S23245479          | 15700184 | G | 0   | 0      | A |
| 25 | BICF2P167323            | 15710039 | A | 0   | 0      | T |
| 25 | BICF2P632442            | 15723664 | A | 0   | 0      | G |
| 25 | BICF2P441185            | 15732447 | A | 0   | 0      | G |
| 25 | BICF2P588070            | 15743909 | A | 0.5 | 0.5714 | G |
| 25 | BICF2P111198            | 15762335 | C | 0.5 | 0.5714 | A |
| 25 | BICF2P1058657           | 15772436 | A | 0   | 0      | G |
| 25 | BICF2P832301            | 15781122 | A | 0   | 0      | G |
| 25 | BICF2S23713251          | 15819437 | 0 | 0   | 0      | A |
| 25 | BICF2P1398661           | 15831708 | 0 | 0   | 0      | G |
| 25 | BICF2P573592            | 15849695 | 0 | 0   | 0      | G |
| 25 | BICF2P466550            | 15858931 | 0 | 0   | 0      | G |
| 25 | BICF2P1326210           | 15872065 | 0 | 0   | 0      | G |
| 25 | BICF2S23748935          | 15937311 | A | 0   | 0      | C |
| 25 | BICF2S23743654          | 15940622 | A | 0   | 0      | G |
| 25 | BICF2S23111545          | 15955950 | G | 0   | 0      | A |
| 25 | BICF2S2369606           | 15963364 | A | 0   | 0      | G |
| 25 | BICF2P378364            | 15977569 | A | 0.5 | 0.5714 | G |
| 25 | BICF2P735800            | 16005438 | G | 0.5 | 0.5714 | A |
| 25 | BICF2P611032            | 16008434 | A | 0.5 | 0.5714 | G |
| 25 | BICF2P937509            | 16026054 | G | 0.5 | 0.5714 | A |
| 25 | BICF2S23724998          | 16053016 | A | 1   | 1      | C |
| 25 | BICF2S23161375          | 16113109 | A | 0.5 | 0.5714 | G |
| 25 | BICF2P576932            | 16143522 | 0 | 0   | 0      | C |
| 25 | BICF2P760407            | 16176104 | C | 0.5 | 0.5833 | A |
| 25 | TIGRP2P325181_rs9192839 | 16190535 | 0 | 0   | 0      | A |
| 25 | BICF2G630467684         | 16225216 | 0 | 0   | 0      | G |
| 25 | BICF2G630467683         | 16256410 | G | 0   | 0      | A |

|    |                         |          |   |     |        |   |
|----|-------------------------|----------|---|-----|--------|---|
| 25 | G1286f17S93             | 16314343 | 0 | 0   | 0      | C |
| 25 | BICF2P1167986           | 16338578 | 0 | 0   | 0      | A |
| 25 | BICF2G630467677         | 16405822 | G | 0   | 0      | A |
| 25 | BICF2G630467669         | 16420886 | A | 0   | 0      | G |
| 25 | BICF2G630467646         | 16429950 | A | 0   | 0      | G |
| 25 | BICF2P754913            | 16442737 | A | 0   | 0      | G |
| 25 | BICF2P1257929           | 16448139 | 0 | 0   | 0      | C |
| 25 | BICF2P1403479           | 16457808 | A | 0.5 | 0.5714 | G |
| 25 | BICF2P1080719           | 16474082 | A | 1   | 1      | C |
| 25 | BICF2G630467635         | 16483524 | A | 0.5 | 0.5714 | G |
| 25 | BICF2G630467631         | 16484487 | G | 0.5 | 0.5714 | A |
| 25 | TIGRP2P325193_rs9184209 | 16490466 | G | 0.5 | 0.5714 | A |
| 25 | BICF2G630467607         | 16493435 | A | 0.5 | 0.5714 | C |
| 25 | BICF2G630467586         | 16506620 | C | 0.5 | 0.4286 | G |
| 25 | BICF2G630467569         | 16522528 | G | 0.5 | 0.4286 | A |
| 25 | BICF2P1266549           | 16530897 | A | 0.5 | 0.4286 | G |
| 25 | BICF2G630467546         | 16539912 | A | 0.5 | 0.5714 | G |
| 25 | BICF2G630467539         | 16555788 | A | 0.5 | 0.5714 | G |
| 25 | BICF2G630467531         | 16562636 | A | 0.5 | 0.5714 | C |
| 25 | BICF2G630467522         | 16580042 | A | 0.5 | 0.5714 | C |
| 25 | BICF2G630467518         | 16588785 | A | 0   | 0      | G |
| 25 | BICF2G630467492         | 16604536 | A | 0   | 0      | G |
| 25 | BICF2G630467465         | 16619828 | G | 1   | 1      | A |
| 25 | TIGRP2P325200_rs8580127 | 16629489 | G | 0   | 0      | A |
| 25 | BICF2P338762            | 16647120 | G | 0   | 0      | A |
| 25 | BICF2G630467422         | 16651959 | A | 1   | 1      | G |
| 25 | BICF2G630467419         | 16657430 | A | 1   | 1      | G |
| 25 | BICF2G630467388         | 16671288 | G | 1   | 1      | A |
| 25 | TIGRP2P325209_rs8822490 | 16689443 | A | 1   | 1      | G |
| 25 | BICF2P975834            | 16698240 | G | 1   | 1      | A |
| 25 | BICF2G630467344         | 16718063 | A | 0.5 | 0.4286 | C |
| 25 | BICF2G630467331         | 16728203 | A | 1   | 1      | T |
| 25 | BICF2G630467329         | 16733068 | A | 0.5 | 0.4286 | G |
| 25 | BICF2G630467322         | 16746828 | A | 1   | 1      | G |
| 25 | TIGRP2P325214_rs8582567 | 16756138 | G | 0.5 | 0.5714 | A |
| 25 | BICF2S23157995          | 16770840 | A | 0   | 0      | G |
| 25 | BICF2S2375793           | 16785858 | 0 | 0   | 0      | G |
| 25 | BICF2P1177054           | 16796007 | G | 0.5 | 0.5714 | A |
| 25 | BICF2P1346176           | 16811776 | 0 | 0   | 0      | G |
| 25 | BICF2G630467316         | 16822600 | A | 0   | 0      | G |
| 25 | BICF2P329190            | 16832606 | 0 | 0   | 0      | A |
| 25 | BICF2G630467314         | 16868387 | C | 0   | 0      | A |
| 25 | BICF2G630467312         | 16871959 | A | 1   | 1      | G |
| 25 | BICF2G630467310         | 16874414 | G | 0   | 0      | A |
| 25 | BICF2G630467298         | 16887065 | A | 0   | 0      | G |
| 25 | BICF2G630467297         | 16887093 | C | 0   | 0      | A |
| 25 | BICF2G630467279         | 16893762 | G | 0   | 0      | A |

|    |                         |          |   |     |        |   |
|----|-------------------------|----------|---|-----|--------|---|
| 25 | BICF2G630467263         | 16906910 | A | 0   | 0      | C |
| 25 | BICF2P1351586           | 16923184 | C | 0   | 0      | G |
| 25 | BICF2S23326518          | 16929869 | A | 1   | 1      | G |
| 25 | BICF2G630467214         | 16946717 | A | 1   | 1      | C |
| 25 | BICF2P696793            | 16961244 | G | 0.5 | 0.5714 | A |
| 25 | BICF2P632319            | 16964039 | A | 0.5 | 0.5714 | G |
| 25 | BICF2P592797            | 16980152 | G | 0.5 | 0.5714 | A |
| 25 | TIGRP2P325233_rs8745971 | 16995772 | G | 0   | 0      | A |
| 25 | BICF2P1076954           | 16997479 | A | 0   | 0      | G |
| 25 | BICF2P227563            | 17009023 | A | 0   | 0      | G |
| 25 | TIGRP2P325253_rs8988870 | 17024009 | A | 0   | 0      | G |
| 25 | BICF2G630467202         | 17033119 | 0 | 0   | 0      | G |
| 25 | BICF2G630467199         | 17054233 | A | 1   | 1      | C |
| 25 | BICF2G630467190         | 17065071 | C | 0   | 0      | A |
| 25 | BICF2G630467183         | 17067711 | C | 0   | 0      | A |
| 25 | BICF2G630467181         | 17082796 | A | 0.5 | 0.4286 | G |
| 25 | BICF2G630467178         | 17095680 | A | 0   | 0      | G |
| 25 | TIGRP2P325270_rs8757903 | 17101444 | C | 0.5 | 0.4286 | A |
| 25 | BICF2P1078785           | 17118818 | G | 0.5 | 0.4286 | A |
| 25 | BICF2G630467177         | 17133625 | A | 0   | 0      | G |
| 25 | BICF2G630467175         | 17140451 | G | 0   | 0      | A |
| 25 | BICF2G630467138         | 17161583 | A | 0   | 0      | G |
| 25 | BICF2P227628            | 17174637 | A | 0   | 0      | G |
| 25 | BICF2G630467101         | 17183503 | A | 0   | 0      | G |
| 25 | BICF2S23238719          | 17195856 | G | 0   | 0      | A |
| 25 | TIGRP2P325289_rs9139342 | 17204507 | C | 0   | 0      | A |
| 25 | BICF2P851222            | 17225694 | G | 0   | 0      | A |
| 25 | TIGRP2P325297_rs8510594 | 17230676 | A | 0   | 0      | G |
| 25 | BICF2P1276784           | 17239936 | C | 0   | 0      | G |
| 25 | BICF2S24318564          | 17256774 | A | 0.5 | 0.5714 | G |
| 25 | TIGRP2P325314_rs9114385 | 17266469 | A | 0.5 | 0.4286 | T |
| 25 | BICF2S23255839          | 17275881 | T | 0.5 | 0.4286 | A |
| 25 | TIGRP2P325320_rs8762174 | 17289279 | G | 0   | 0      | A |
| 25 | TIGRP2P325324_rs8914750 | 17298712 | G | 1   | 1      | A |
| 25 | BICF2P800181            | 17316683 | G | 0.5 | 0.5714 | A |
| 25 | BICF2P441558            | 17325686 | G | 0.5 | 0.5714 | A |
| 25 | BICF2G630467027         | 17340122 | C | 0   | 0      | A |
| 25 | BICF2P218516            | 17343097 | G | 0   | 0      | A |
| 25 | BICF2G630466994         | 17359268 | A | 1   | 1      | G |
| 25 | BICF2G630466944         | 17374363 | A | 0   | 0      | G |
| 25 | BICF2G630466934         | 17381082 | A | 0   | 0      | G |
| 25 | BICF2G630466933         | 17381220 | G | 0.5 | 0.5714 | A |
| 25 | BICF2G630466926         | 17388181 | A | 0   | 0      | C |
| 25 | BICF2G630466907         | 17405578 | A | 0.5 | 0.5714 | G |
| 25 | BICF2S23627682          | 17413093 | A | 0.5 | 0.5714 | G |
| 25 | BICF2G630466881         | 17419809 | A | 0   | 0      | G |
| 25 | BICF2G630466868         | 17422770 | A | 0   | 0      | C |

|    |                         |          |   |     |        |   |
|----|-------------------------|----------|---|-----|--------|---|
| 25 | BICF2P266202            | 17437130 | A | 0   | 0      | C |
| 25 | BICF2P798712            | 17443723 | G | 0   | 0      | A |
| 25 | BICF2P810709            | 17446213 | G | 0   | 0      | A |
| 25 | BICF2G630466796         | 17466510 | A | 0   | 0      | G |
| 25 | BICF2G630466772         | 17481400 | A | 0   | 0      | G |
| 25 | BICF2G630466746         | 17505535 | A | 0.5 | 0.4286 | C |
| 25 | BICF2S23132653          | 17528264 | G | 0.5 | 0.4286 | A |
| 25 | TIGRP2P325355_rs9133937 | 17541208 | G | 0   | 0      | A |
| 25 | BICF2P1150935           | 17558536 | A | 0   | 0      | G |
| 25 | BICF2P930327            | 17570581 | O | 0   | 0      | A |
| 25 | BICF2S23642300          | 17578107 | T | 0   | 0      | A |
| 25 | BICF2G630466645         | 17584188 | G | 0   | 0      | A |
| 25 | BICF2G630466639         | 17587367 | G | 0   | 0      | A |
| 25 | BICF2P646054            | 17603770 | G | 0.5 | 0.4286 | A |
| 25 | BICF2G630466624         | 17607103 | G | 0   | 0      | A |
| 25 | TIGRP2P325395_rs9141944 | 17621316 | G | 0   | 0      | A |
| 25 | BICF2S2348107           | 17632045 | A | 0   | 0      | G |
| 25 | TIGRP2P325405_rs9248782 | 17648524 | O | 0   | 0      | A |
| 25 | BICF2G630466581         | 17653741 | A | 0   | 0      | G |
| 25 | BICF2G630466569         | 17664610 | O | 0   | 0      | G |
| 25 | BICF2P1328532           | 17685126 | A | 0.5 | 0.4286 | G |
| 25 | BICF2G630466565         | 17687558 | G | 1   | 1      | A |
| 25 | BICF2G630466564         | 17688503 | G | 1   | 1      | A |
| 25 | TIGRP2P325430_rs8965560 | 17699462 | A | 0.5 | 0.5714 | G |
| 25 | BICF2G630466551         | 17710329 | A | 0.5 | 0.4286 | G |
| 25 | BICF2G630466512         | 17733568 | G | 0.5 | 0.4286 | A |
| 25 | BICF2G630466500         | 17744643 | A | 0   | 0      | G |
| 25 | BICF2P466366            | 17770109 | A | 0   | 0      | T |
| 25 | BICF2P728349            | 17785988 | A | 0   | 0      | G |
| 25 | BICF2S23034400          | 17803997 | A | 0   | 0      | G |
| 25 | BICF2G630466495         | 17833216 | O | 0   | 0      | G |
| 25 | TIGRP2P325459_rs8545797 | 17837987 | A | 0   | 0      | G |
| 25 | TIGRP2P325467_rs8917483 | 17848201 | A | 0   | 0      | G |
| 25 | BICF2P1136054           | 17862311 | G | 0   | 0      | C |
| 25 | BICF2P314688            | 17881631 | A | 1   | 1      | G |
| 25 | BICF2P388183            | 17888918 | C | 1   | 1      | A |
| 25 | BICF2P1190574           | 17901355 | A | 1   | 1      | G |
| 25 | BICF2G630466494         | 17908276 | A | 0   | 0      | G |
| 25 | BICF2P1071872           | 17928262 | A | 0   | 0      | G |
| 25 | BICF2G630466492         | 17937561 | A | 0   | 0      | C |
| 25 | BICF2G630466489         | 17950251 | G | 0   | 0      | A |
| 25 | BICF2G630466476         | 17953942 | A | 0   | 0      | G |
| 25 | BICF2P1294828           | 17968793 | C | 1   | 1      | G |
| 25 | BICF2P1294829           | 17968821 | G | 1   | 1      | A |
| 25 | BICF2P240618            | 17976690 | A | 1   | 1      | G |
| 25 | BICF2G630466436         | 17987533 | C | 0   | 0      | A |
| 25 | BICF2P1291127           | 18008445 | A | 1   | 1      | G |



|    |                         |          |   |     |        |   |
|----|-------------------------|----------|---|-----|--------|---|
| 25 | TIGRP2P325484_rs8616041 | 18009014 | G | 1   | 1      | A |
| 25 | TIGRP2P325488_rs8793775 | 18021797 | C | 1   | 1      | G |
| 25 | BICF2G630466433         | 18034491 | A | 0   | 0      | G |
| 25 | TIGRP2P325494_rs8982179 | 18054493 | G | 0   | 0      | A |
| 25 | BICF2P1000685           | 18058505 | G | 1   | 1      | A |
| 25 | BICF2P429109            | 18072608 | G | 0   | 0      | A |
| 25 | BICF2P46265             | 18078566 | C | 0   | 0      | A |
| 25 | BICF2P824497            | 18089936 | A | 0   | 0      | G |
| 25 | BICF2P277108            | 18097744 | C | 0   | 0      | A |
| 25 | BICF2G630466421         | 18105386 | G | 0   | 0      | A |
| 25 | BICF2P214217            | 18118418 | A | 0   | 0      | G |
| 25 | TIGRP2P325513_rs8856314 | 18125246 | A | 0   | 0      | C |
| 25 | BICF2P1260575           | 18158348 | G | 0   | 0      | A |
| 25 | BICF2S22955324          | 18165927 | C | 0   | 0      | A |
| 25 | BICF2P1052504           | 18175296 | A | 0   | 0      | T |
| 25 | BICF2P62278             | 18188776 | G | 1   | 1      | A |
| 25 | BICF2G630466415         | 18194995 | A | 0   | 0      | G |
| 25 | TIGRP2P325564_rs9128066 | 18216069 | A | 0.5 | 0.3571 | G |
| 25 | BICF2S23764793          | 18230656 | G | 0.5 | 0.3571 | A |
| 25 | BICF2P532088            | 18241686 | A | 0   | 0      | G |
| 25 | BICF2P1074695           | 18256112 | A | 0.5 | 0.6429 | G |
| 25 | BICF2P1066357           | 18265345 | C | 0.5 | 0.3571 | A |
| 25 | BICF2P1036885           | 18283135 | C | 0   | 0      | A |
| 25 | BICF2P1309207           | 18285714 | A | 0.5 | 0.6429 | G |
| 25 | TIGRP2P325592_rs8983523 | 18310890 | C | 0.5 | 0.6429 | A |
| 25 | BICF2P733835            | 18322094 | G | 1   | 1      | A |
| 25 | BICF2P554584            | 18350370 | A | 0   | 0      | G |
| 25 | BICF2P432875            | 18355201 | G | 0   | 0      | A |
| 25 | TIGRP2P325604_rs8936659 | 18375965 | A | 0.5 | 0.6429 | G |
| 25 | BICF2S23237883          | 18384877 | 0 | 0   | 0      | G |
| 25 | BICF2P251437            | 18388528 | A | 0.5 | 0.3571 | G |
| 25 | BICF2G630466407         | 18405223 | A | 0.5 | 0.3571 | G |
| 25 | BICF2G630466400         | 18411629 | A | 0.5 | 0.3571 | G |
| 25 | BICF2G630466387         | 18432868 | G | 0   | 0      | A |
| 25 | BICF2S2345846           | 18445038 | G | 0.5 | 0.3571 | A |
| 25 | BICF2P1425914           | 18449052 | 0 | 0   | 0      | A |
| 25 | BICF2G630466348         | 18463008 | A | 0   | 0      | G |
| 25 | BICF2G630466328         | 18475978 | A | 0   | 0      | G |
| 25 | BICF2G630466322         | 18484401 | A | 0.5 | 0.3571 | C |
| 25 | BICF2G630466294         | 18501832 | A | 0.5 | 0.3571 | G |
| 25 | BICF2G630466290         | 18506278 | A | 0   | 0      | G |
| 25 | BICF2P938287            | 18515285 | G | 0   | 0      | A |
| 25 | BICF2G630466235         | 18532121 | A | 0.5 | 0.3571 | G |
| 25 | BICF2G630466222         | 18543877 | G | 0   | 0      | A |
| 25 | BICF2G630466221         | 18546108 | C | 0   | 0      | G |
| 25 | BICF2G630466210         | 18551995 | A | 0   | 0      | C |
| 25 | TIGRP2P325645_rs8821330 | 18562754 | A | 0   | 0      | T |

|    |                         |          |   |     |        |   |
|----|-------------------------|----------|---|-----|--------|---|
| 25 | BICF2P156683            | 18590498 | C | 0.5 | 0.6429 | A |
| 25 | BICF2G630466172         | 18601277 | G | 0.5 | 0.6429 | A |
| 25 | BICF2G630466155         | 18608359 | A | 0   | 0      | C |
| 25 | BICF2P1434742           | 18629709 | A | 0.5 | 0.3571 | G |
| 25 | BICF2S23615744          | 18633368 | 0 | 0   | 0      | A |
| 25 | BICF2G630466089         | 18642466 | T | 0   | 0      | A |
| 25 | BICF2P829681            | 18653938 | A | 0.5 | 0.3571 | G |
| 25 | BICF2G630466060         | 18665027 | A | 0   | 0      | G |
| 25 | BICF2G630466041         | 18682284 | G | 0   | 0      | A |
| 25 | BICF2G630466040         | 18696113 | C | 0   | 0      | G |
| 25 | BICF2S2331910           | 18702489 | G | 0.5 | 0.6429 | A |
| 25 | BICF2S23740313          | 18712803 | 0 | 0   | 0      | T |
| 25 | BICF2P1217318           | 18722427 | 0 | 0   | 0      | G |
| 25 | BICF2S23454105          | 18740047 | A | 0.5 | 0.6429 | G |
| 25 | BICF2P186580            | 18752312 | G | 0.5 | 0.3571 | A |
| 25 | BICF2P650367            | 18784161 | 0 | 0   | 0      | A |
| 25 | BICF2P831093            | 18796558 | A | 0.5 | 0.6429 | T |
| 25 | TIGRP2P325712_rs9176302 | 18813897 | A | 0.5 | 0.6429 | G |
| 25 | TIGRP2P325719_rs8942199 | 18825275 | A | 0.5 | 0.6429 | G |
| 25 | BICF2P329807            | 18832469 | A | 0.5 | 0.6429 | G |
| 25 | BICF2G630466032         | 18837998 | A | 0   | 0      | G |
| 25 | BICF2P270994            | 18858521 | A | 0   | 0      | G |
| 25 | BICF2P886369            | 18877009 | C | 0.5 | 0.3571 | A |
| 25 | BICF2G630466023         | 18888758 | A | 0.5 | 0.3571 | C |
| 25 | BICF2G630466007         | 18898148 | A | 0.5 | 0.3571 | G |
| 25 | BICF2G630466001         | 18911813 | A | 0   | 0      | G |
| 25 | BICF2G630465987         | 18918638 | A | 0.5 | 0.3571 | T |
| 25 | BICF2G630465974         | 18934376 | A | 0.5 | 0.6429 | G |
| 25 | BICF2P105876            | 18940912 | A | 0.5 | 0.6429 | G |
| 25 | BICF2G630465970         | 18958865 | C | 0.5 | 0.6429 | G |
| 25 | BICF2P820324            | 18974542 | A | 0   | 0      | G |
| 25 | BICF2G630465963         | 18979124 | A | 0   | 0      | G |
| 25 | BICF2S2365083           | 18990407 | G | 0.5 | 0.6429 | A |
| 25 | BICF2G630465937         | 19001779 | A | 0.5 | 0.6429 | G |
| 25 | TIGRP2P325742_rs9063631 | 19015460 | A | 0   | 0      | G |
| 25 | BICF2S23027839          | 19023090 | A | 0.5 | 0.6429 | G |
| 25 | BICF2G630465925         | 19040429 | C | 0   | 0      | A |
| 25 | BICF2G630465921         | 19044328 | G | 0   | 0      | A |
| 25 | BICF2G630465898         | 19063648 | G | 0.5 | 0.6429 | A |
| 25 | BICF2G630465891         | 19069344 | G | 0.5 | 0.8571 | A |
| 25 | BICF2G630465882         | 19081065 | A | 0.5 | 0.8571 | C |
| 25 | BICF2G630465861         | 19096422 | G | 0.5 | 0.8571 | A |
| 25 | BICF2G630465849         | 19102610 | G | 0.5 | 0.9167 | A |
| 25 | BICF2G630465835         | 19123101 | C | 1   | 1      | A |
| 25 | BICF2G630465830         | 19123857 | T | 1   | 1      | A |
| 25 | BICF2P539407            | 19141008 | 0 | 0   | 0      | G |
| 25 | BICF2G630465768         | 19153167 | A | 0.5 | 0.6429 | G |

|    |                         |          |   |     |        |   |
|----|-------------------------|----------|---|-----|--------|---|
| 25 | BICF2G630465742         | 19165147 | A | 0.5 | 0.6429 | G |
| 25 | BICF2G630465735         | 19170965 | G | 0   | 0      | C |
| 25 | BICF2G630465734         | 19176692 | A | 0   | 0      | G |
| 25 | BICF2G630465731         | 19182228 | C | 1   | 1      | A |
| 25 | BICF2G630465717         | 19194142 | A | 0.5 | 0.6429 | G |
| 25 | BICF2G630465708         | 19214677 | A | 0   | 0.2143 | G |
| 25 | BICF2G630465707         | 19217270 | A | 0.5 | 0.75   | C |
| 25 | BICF2G630465695         | 19236335 | C | 0.5 | 0.1429 | A |
| 25 | BICF2G630465692         | 19250043 | G | 1   | 1      | A |
| 25 | BICF2G630465678         | 19258191 | G | 0.5 | 0.8571 | A |
| 25 | BICF2G630465675         | 19264136 | G | 0   | 0      | A |
| 25 | BICF2G630465639         | 19272427 | G | 0.5 | 0.8571 | A |
| 25 | BICF2G630465628         | 19276656 | G | 1   | 0.7857 | A |
| 25 | BICF2P1096601           | 19294742 | A | 0.5 | 0.6429 | G |
| 25 | BICF2S23753135          | 19301543 | G | 1   | 1      | A |
| 25 | BICF2G630465614         | 19309603 | A | 0   | 0      | G |
| 25 | BICF2G630465605         | 19324590 | A | 1   | 1      | G |
| 25 | BICF2G630465592         | 19335706 | T | 0   | 0      | A |
| 25 | BICF2G630465575         | 19348611 | C | 0   | 0      | A |
| 25 | TIGRP2P325789_rs8852060 | 19358401 | A | 0.5 | 0.6429 | G |
| 25 | BICF2G630465529         | 19376052 | A | 0.5 | 0.8571 | G |
| 25 | BICF2S22938566          | 19376204 | C | 0.5 | 0.8571 | A |
| 25 | BICF2G630465526         | 19380144 | A | 0   | 0      | G |
| 25 | BICF2G630465505         | 19390811 | A | 0.5 | 0.6429 | G |
| 25 | BICF2G630465494         | 19396876 | C | 0.5 | 0.1429 | A |
| 25 | BICF2P1115404           | 19406943 | A | 0   | 0      | G |
| 25 | BICF2P976360            | 19422149 | G | 1   | 1      | A |
| 25 | BICF2S2397410           | 19432962 | A | 0   | 0.2143 | G |
| 25 | BICF2P1227004           | 19433106 | A | 0   | 0      | G |
| 25 | BICF2P1039156           | 19440033 | A | 1   | 0.7857 | G |
| 25 | TIGRP2P325812_rs8624499 | 19452427 | A | 0   | 0      | G |
| 25 | BICF2P381645            | 19463573 | A | 0   | 0      | G |
| 25 | BICF2P908345            | 19474855 | G | 0.5 | 0.8571 | A |
| 25 | BICF2P1279929           | 19481769 | A | 0.5 | 0.3    | G |
| 25 | BICF2P848181            | 19505005 | G | 0   | 0.2143 | A |
| 25 | BICF2G630465466         | 19517859 | A | 0   | 0      | G |
| 25 | BICF2P1002966           | 19528578 | A | 0   | 0      | C |
| 25 | BICF2G630465418         | 19553375 | A | 0   | 0      | G |
| 25 | BICF2G630465413         | 19563225 | A | 0   | 0      | G |
| 25 | TIGRP2P325851_rs8766786 | 19573956 | 0 | 0   | 0      | G |
| 25 | BICF2G630465383         | 19594620 | G | 0   | 0      | A |
| 25 | BICF2G630465377         | 19599385 | A | 0.5 | 0.1429 | G |
| 25 | BICF2G630465365         | 19612759 | G | 1   | 0.7857 | A |
| 25 | BICF2G630465361         | 19622266 | A | 0   | 0      | G |
| 25 | BICF2G630465360         | 19628219 | A | 0   | 0      | G |
| 25 | BICF2P167584            | 19632638 | G | 0   | 0      | A |
| 25 | BICF2S23624829          | 19652889 | A | 0.5 | 0.6429 | G |

|    |                         |          |   |     |        |   |
|----|-------------------------|----------|---|-----|--------|---|
| 25 | BICF2S23637753          | 19657946 | A | 0   | 0.2143 | G |
| 25 | BICF2S23449636          | 19678758 | A | 0.5 | 0.1429 | G |
| 25 | TIGRP2P325890_rs8708648 | 19695408 | A | 0   | 0      | G |
| 25 | BICF2S23061402          | 19706084 | G | 0.5 | 0.8571 | A |
| 25 | BICF2P268305            | 19711212 | G | 0.5 | 0.8571 | A |
| 25 | BICF2P854934            | 19725059 | G | 0   | 0.2143 | A |
| 25 | BICF2P1295045           | 19742525 | G | 0   | 0.2143 | A |
| 25 | TIGRP2P325895_rs9146181 | 19782516 | 0 | 0   | 0      | C |
| 25 | BICF2P756236            | 19791602 | A | 0   | 0      | C |
| 25 | BICF2P424103            | 19809460 | G | 0   | 0.2143 | A |
| 25 | BICF2P196177            | 19821233 | 0 | 0   | 0      | A |
| 25 | BICF2P1160139           | 19834209 | 0 | 0   | 0      | A |
| 25 | BICF2P114568            | 19838526 | G | 0   | 0.2143 | A |
| 25 | BICF2P1016942           | 19851164 | A | 0   | 0      | G |
| 25 | BICF2P180006            | 19868370 | C | 0.5 | 0.75   | G |
| 25 | TIGRP2P325913_rs9115264 | 19876961 | 0 | 0   | 0      | A |
| 25 | BICF2P344438            | 19883939 | G | 0.5 | 0.3571 | A |
| 25 | BICF2P823340            | 19895211 | A | 0   | 0.2143 | G |
| 25 | BICF2P277612            | 19913833 | 0 | 0   | 0      | A |
| 25 | TIGRP2P325923_rs9073800 | 19927711 | 0 | 0   | 0      | A |
| 25 | TIGRP2P325925_rs8811206 | 19936752 | 0 | 0   | 0      | G |
| 25 | BICF2S23060896          | 19941620 | G | 0.5 | 0.3571 | C |
| 25 | BICF2P229565            | 19956319 | A | 0   | 0      | G |
| 25 | BICF2S23118163          | 19975472 | G | 0.5 | 0.1429 | A |
| 25 | BICF2P713774            | 19976219 | A | 0.5 | 0.1429 | G |
| 25 | BICF2P758115            | 19987067 | A | 1   | 1      | G |
| 25 | BICF2P1021921           | 20010673 | G | 0.5 | 0.1429 | A |
| 25 | BICF2P200922            | 20024242 | 0 | 0   | 0      | C |
| 25 | BICF2P73864             | 20043997 | G | 0.5 | 0.75   | A |
| 25 | TIGRP2P325954_rs8820191 | 20045879 | A | 0.5 | 0.8571 | G |
| 25 | BICF2P395655            | 20064274 | G | 0.5 | 0.8571 | A |
| 25 | BICF2P1309405           | 20071239 | 0 | 0   | 0      | A |
| 25 | BICF2P328815            | 20084168 | A | 0.5 | 0.8571 | G |
| 25 | BICF2P1373776           | 20094271 | 0 | 0   | 0      | G |
| 25 | BICF2S23621528          | 20123263 | C | 0   | 0      | A |
| 25 | TIGRP2P325963_rs9165179 | 20144057 | G | 0.5 | 0.8571 | A |
| 25 | BICF2P792274            | 20150085 | G | 0   | 0      | A |
| 25 | BICF2S23153700          | 20164293 | A | 0   | 0.2143 | G |
| 25 | BICF2P379743            | 20185843 | A | 0.5 | 0.8571 | G |
| 25 | TIGRP2P325974_rs8951078 | 20213473 | 0 | 0   | 0      | C |
| 25 | BICF2S2343040           | 20220306 | C | 0   | 0      | A |
| 25 | BICF2P602699            | 20242086 | 0 | 0   | 0      | G |
| 25 | BICF2P26674             | 20256263 | A | 0   | 0      | G |
| 25 | BICF2P990253            | 20264773 | A | 0   | 0      | G |
| 25 | TIGRP2P325977_rs8907971 | 20296385 | 0 | 0   | 0      | G |
| 25 | BICF2P902652            | 20297823 | A | 0   | 0      | C |
| 25 | BICF2P142706            | 20315060 | G | 0   | 0      | A |

|    |                         |          |   |     |        |   |
|----|-------------------------|----------|---|-----|--------|---|
| 25 | BICF2P353431            | 20342552 | G | 0   | 0.2143 | A |
| 25 | BICF2P1381152           | 20348264 | 0 | 0   | 0      | G |
| 25 | BICF2P55882             | 20358713 | C | 0   | 0.2143 | A |
| 25 | BICF2S23548297          | 20365679 | A | 0   | 0      | G |
| 25 | BICF2S2327478           | 20374308 | C | 0   | 0.2143 | A |
| 25 | BICF2P879221            | 20399873 | 0 | 0   | 0      | A |
| 25 | BICF2P1106744           | 20416282 | 0 | 0   | 0      | A |
| 25 | BICF2S23762030          | 20433658 | A | 0.5 | 0.6429 | G |
| 25 | BICF2S23356823          | 20451166 | G | 0.5 | 0.8571 | A |
| 25 | BICF2P766575            | 20485165 | A | 0   | 0      | T |
| 25 | BICF2P638694            | 20535581 | A | NA  | 0      | G |
| 25 | BICF2P1281572           | 20543438 | A | 0   | 0      | G |
| 25 | BICF2S23331793          | 20560697 | G | 0.5 | 0.6429 | A |
| 25 | TIGRP2P326021_rs8842805 | 20566792 | 0 | 0   | 0      | G |
| 25 | BICF2P1241934           | 20573582 | A | 0   | 0      | G |
| 25 | BICF2P314365            | 20596104 | A | 0   | 0      | C |
| 25 | BICF2P569169            | 20607805 | C | 0   | 0      | A |
| 25 | BICF2P569168            | 20608440 | 0 | 0   | 0      | A |
| 25 | BICF2S23259396          | 20644926 | A | 0   | 0      | G |
| 25 | BICF2P961667            | 20655330 | C | 0   | 0      | A |
| 25 | BICF2P17812             | 20675082 | A | 0   | 0      | G |
| 25 | BICF2P894647            | 20688158 | A | 0   | 0      | G |
| 25 | BICF2P331533            | 20691029 | G | 0   | 0      | A |
| 25 | TIGRP2P326026_rs8738523 | 20701865 | 0 | 0   | 0      | C |
| 25 | BICF2P59898             | 20733822 | A | 0   | 0      | G |
| 25 | BICF2S23053385          | 20741725 | G | 0   | 0      | A |
| 25 | BICF2P519713            | 20746535 | 0 | 0   | 0      | A |
| 25 | BICF2P107372            | 20762786 | 0 | 0   | 0      | A |
| 25 | BICF2P1051342           | 20776352 | A | 0   | 0      | G |
| 25 | BICF2S23745226          | 20783587 | G | 0   | 0      | A |
| 25 | BICF2P1317216           | 20808758 | G | 0   | 0.2143 | A |
| 25 | BICF2P716511            | 20815090 | A | 0   | 0      | G |
| 25 | BICF2S23449533          | 20828891 | C | 0   | 0.2143 | A |
| 25 | BICF2S2319853           | 20844714 | G | 0   | 0.2143 | A |
| 25 | BICF2P1266815           | 20872498 | C | 0   | 0      | G |
| 25 | BICF2P304068            | 20875803 | G | 0   | 0      | A |
| 25 | BICF2P500784            | 20891565 | C | 0   | 0.2143 | A |
| 25 | BICF2P609839            | 20900831 | A | 0   | 0.2143 | C |
| 25 | BICF2P1376501           | 20923206 | 0 | 0   | 0      | G |
| 25 | BICF2P441348            | 20932530 | 0 | 0   | 0      | G |
| 25 | BICF2S23418255          | 20945391 | G | 0   | 0      | A |
| 25 | BICF2P673660            | 20967405 | 0 | 0   | 0      | C |
| 25 | BICF2P336834            | 20977402 | G | 0   | 0      | A |
| 25 | BICF2P336836            | 20977961 | A | 0   | 0      | G |
| 25 | BICF2P1173163           | 20989069 | G | 0   | 0      | A |
| 25 | BICF2S23440346          | 21003557 | A | 1   | 1      | G |
| 25 | BICF2P308358            | 21011762 | G | 1   | 1      | A |

|    |                         |          |   |     |        |   |
|----|-------------------------|----------|---|-----|--------|---|
| 25 | BICF2S23117331          | 21020826 | A | 0   | 0      | G |
| 25 | BICF2P151011            | 21025960 | 0 | 0   | 0      | G |
| 25 | BICF2S23623257          | 21039358 | 0 | 0   | 0      | G |
| 25 | BICF2P271202            | 21055266 | A | 0   | 0      | G |
| 25 | BICF2P118545            | 21067225 | A | 0   | 0      | G |
| 25 | BICF2P785931            | 21072931 | G | 0   | 0      | A |
| 25 | BICF2P522742            | 21087958 | A | 1   | 1      | G |
| 25 | BICF2P226348            | 21099211 | A | 0   | 0      | G |
| 25 | BICF2P138390            | 21112510 | G | 1   | 1      | A |
| 25 | BICF2P231765            | 21143766 | A | 0   | 0      | G |
| 25 | BICF2P721197            | 21164419 | A | 0   | 0      | G |
| 25 | BICF2P1161651           | 21204535 | G | 0   | 0      | A |
| 25 | BICF2P558047            | 21215313 | A | 0   | 0      | G |
| 25 | BICF2P1201422           | 21230562 | G | 0   | 0      | A |
| 25 | BICF2P678745            | 21250307 | G | 0   | 0      | A |
| 25 | BICF2P942205            | 21274406 | A | 0.5 | 0.3571 | G |
| 25 | TIGRP2P326033_rs8973360 | 21276068 | 0 | 0   | 0      | C |
| 25 | BICF2P721712            | 21305795 | A | 0.5 | 0.3571 | G |
| 25 | TIGRP2P326036_rs8956659 | 21310838 | A | 0.5 | 0.3571 | G |
| 25 | BICF2S23731713          | 21325465 | A | 0.5 | 0.3571 | C |
| 25 | TIGRP2P326044_rs8952957 | 21341730 | G | 0.5 | 0.3571 | A |
| 25 | BICF2P754207            | 21344013 | 0 | 0   | 0      | A |
| 25 | BICF2P1136046           | 21363746 | A | 0.5 | 0.3571 | G |
| 25 | TIGRP2P326049_rs9031233 | 21376042 | G | 0.5 | 0.3571 | A |
| 25 | TIGRP2P326051_rs9204735 | 21381305 | C | 0.5 | 0.3571 | A |
| 25 | BICF2P583528            | 21405517 | A | 0.5 | 0.3571 | G |
| 25 | BICF2P1367433           | 21417045 | A | 0.5 | 0.3571 | G |
| 25 | BICF2P544298            | 21431619 | A | 0.5 | 0.6429 | G |
| 25 | BICF2P496795            | 21432718 | T | 0.5 | 0.6429 | A |
| 25 | TIGRP2P326070_rs8557163 | 21451684 | G | 0.5 | 0.6429 | A |
| 25 | BICF2P629807            | 21466510 | G | 1   | 1      | A |
| 25 | BICF2P100920            | 21471695 | G | 1   | 1      | A |
| 25 | BICF2S23621218          | 21485046 | A | 0.5 | 0.1429 | G |
| 25 | TIGRP2P326077_rs8855659 | 21494481 | A | 0.5 | 0.6429 | G |
| 25 | BICF2P1416713           | 21507306 | A | 1   | 0.8333 | G |
| 25 | BICF2P947597            | 21520139 | G | 0.5 | 0.1429 | A |
| 25 | BICF2P214041            | 21531984 | A | 0   | 0      | G |
| 25 | BICF2P1129248           | 21539901 | A | 0   | 0.2143 | G |
| 25 | BICF2P1434072           | 21567953 | A | 0   | 0      | C |
| 25 | TIGRP2P326082_rs8627888 | 21584665 | G | 0.5 | 0.8571 | C |
| 25 | BICF2P569797            | 21587801 | A | 0.5 | 0.8571 | T |
| 25 | TIGRP2P326085_rs9177572 | 21600259 | 0 | 0   | 0      | G |
| 25 | TIGRP2P326089_rs8795290 | 21628675 | A | 0.5 | 0.8571 | G |
| 25 | BICF2P311482            | 21680143 | 0 | 0   | 0      | A |
| 25 | BICF2P691268            | 21692029 | 0 | 0   | 0      | C |
| 25 | BICF2P765777            | 21703318 | C | 0   | 0.2143 | A |
| 25 | BICF2P823079            | 21723782 | 0 | 0   | 0      | C |

|    |                         |          |   |     |        |   |
|----|-------------------------|----------|---|-----|--------|---|
| 25 | TIGRP2P326096_rs8973722 | 21746088 | A | 0.5 | 0.1429 | G |
| 25 | TIGRP2P326100_rs9221922 | 21749774 | A | 0.5 | 0.1429 | G |
| 25 | BICF2P554451            | 21759007 | A | 0.5 | 0.1429 | G |
| 25 | BICF2P547446            | 21772994 | G | 0.5 | 0.1429 | A |
| 25 | BICF2P86649             | 21798423 | C | 0.5 | 0.1429 | A |
| 25 | BICF2P149503            | 21826125 | G | 0.5 | 0.1429 | A |
| 25 | BICF2S23425698          | 21831579 | A | 0   | 0      | G |
| 25 | BICF2P765580            | 21846080 | A | 0   | 0      | G |
| 25 | BICF2P811222            | 21856115 | A | 0   | 0      | G |
| 25 | BICF2P811227            | 21857586 | C | 0   | 0      | A |
| 25 | BICF2P1340261           | 21870333 | G | 0   | 0      | A |
| 25 | BICF2S23541806          | 21873701 | G | 0   | 0.2143 | A |
| 25 | BICF2P729771            | 21894924 | G | 0   | 0      | A |
| 25 | BICF2S23522137          | 21898097 | G | 1   | 1      | A |
| 25 | BICF2S23325120          | 21912859 | T | 0.5 | 0.8571 | A |
| 25 | BICF2P740200            | 21914402 | G | 0.5 | 0.8571 | A |
| 25 | BICF2P363499            | 21921257 | G | 0.5 | 0.8571 | A |
| 25 | TIGRP2P326163_rs9104941 | 21921938 | A | 0.5 | 0.8571 | G |
| 25 | TIGRP2P326173_rs8527028 | 21941233 | G | 0.5 | 0.8571 | A |
| 25 | BICF2S23353913          | 21956228 | G | 0.5 | 0.8571 | A |
| 25 | BICF2P606256            | 21970325 | A | 0.5 | 0.8571 | G |
| 25 | BICF2S2356184           | 21978098 | C | 1   | 1      | A |
| 25 | BICF2P588696            | 22008756 | C | 0   | 0      | G |
| 25 | BICF2P466539            | 22014726 | G | 0   | 0      | C |
| 25 | BICF2S23256087          | 22039568 | A | 0.5 | 0.8571 | G |
| 25 | BICF2P1469593           | 22046775 | G | 1   | 1      | A |
| 25 | BICF2P464092            | 22078856 | A | 0   | 0      | G |
| 25 | BICF2P681922            | 22085538 | G | 0.5 | 0.1429 | A |
| 25 | BICF2S23647437          | 22095277 | C | 1   | 1      | A |
| 25 | BICF2S23259861          | 22107149 | A | 1   | 1      | C |
| 25 | BICF2S2335119           | 22124721 | A | NA  | 0.6667 | G |
| 25 | TIGRP2P326261_rs8691520 | 22135337 | A | 0.5 | 0.8571 | C |
| 25 | BICF2P559599            | 22156254 | A | 0   | 0.2143 | G |
| 25 | TIGRP2P326277_rs9165217 | 22170436 | G | 0.5 | 0.1429 | A |
| 25 | BICF2P893575            | 22172492 | A | 0.5 | 0.1429 | G |
| 25 | BICF2P1462715           | 22189012 | 0 | 0   | 0      | A |
| 25 | BICF2S23518882          | 22202316 | G | 0.5 | 0.1429 | A |
| 25 | BICF2S23211073          | 22212729 | A | 0.5 | 0.1429 | G |
| 25 | TIGRP2P326282_rs8964593 | 22219705 | 0 | 0   | 0      | A |
| 25 | BICF2P19219             | 22231374 | 0 | 0   | 0      | A |
| 25 | BICF2S23454614          | 22242001 | C | 0.5 | 0.6429 | A |
| 25 | BICF2S23421299          | 22260653 | G | 0.5 | 0.3571 | A |
| 25 | BICF2P124356            | 22268464 | C | 0   | 0.2143 | A |
| 25 | BICF2S23043575          | 22290113 | A | 1   | 1      | G |
| 25 | BICF2P628057            | 22301457 | A | 0   | 0      | G |
| 25 | BICF2P1205586           | 22310370 | A | NA  | NA     | G |
| 25 | TIGRP2P326307_rs8641498 | 22324634 | A | 0   | 0      | G |

|    |                         |          |   |     |        |   |
|----|-------------------------|----------|---|-----|--------|---|
| 25 | BICF2S245433            | 22340814 | G | 0.5 | 0.1429 | A |
| 25 | BICF2S22911015          | 22360953 | A | 1   | 1      | C |
| 25 | TIGRP2P326323_rs8753378 | 22370654 | G | 0.5 | 0.1429 | A |
| 25 | BICF2S23720560          | 22379565 | 0 | 0   | 0      | G |
| 25 | TIGRP2P326326_rs8928566 | 22394156 | A | 0   | 0.2143 | G |
| 25 | BICF2P779216            | 22404991 | G | 0   | 0      | A |
| 25 | BICF2P1248584           | 22418175 | G | 0   | 0.2143 | A |
| 25 | TIGRP2P326349_rs8728288 | 22425329 | A | 1   | 0.7857 | G |
| 25 | TIGRP2P326351_rs9212861 | 22427836 | G | 1   | 0.7857 | A |
| 25 | BICF2P462950            | 22445841 | A | 1   | 1      | T |
| 25 | BICF2S2439562           | 22456377 | A | 0   | 0      | G |
| 25 | TIGRP2P326371_rs8794333 | 22460534 | G | 0   | 0.2143 | A |
| 25 | BICF2P462240            | 22478272 | A | 0.5 | 0.8571 | C |
| 25 | BICF2P168329            | 22485505 | A | 0   | 0      | G |
| 25 | TIGRP2P326387_rs9208778 | 22498339 | G | 0.5 | 0.8571 | A |
| 25 | BICF2S23762951          | 22507272 | C | 0.5 | 0.1429 | A |
| 25 | BICF2P1468350           | 22529775 | A | 0.5 | 0.1429 | C |
| 25 | TIGRP2P326402_rs8490469 | 22551019 | A | 1   | 0.6667 | C |
| 25 | TIGRP2P326412_rs9112082 | 22580125 | A | 0.5 | 0.1429 | G |
| 25 | TIGRP2P326413_rs9146062 | 22587869 | A | 0.5 | 0.1429 | G |
| 25 | BICF2P581216            | 22599206 | A | 0   | 0      | G |
| 25 | BICF2P177301            | 22618433 | 0 | 0   | 0      | A |
| 25 | BICF2P388705            | 22620702 | A | 0.5 | 0.3571 | G |
| 25 | BICF2P1253155           | 22640027 | A | 1   | 0.7857 | G |
| 25 | BICF2P71004             | 22645241 | G | 1   | 0.7857 | A |
| 25 | TIGRP2P326458_rs9245895 | 22667865 | G | 0.5 | 0.25   | A |
| 25 | BICF2P1424830           | 22700038 | A | 0   | 0.1667 | G |
| 25 | BICF2S24112173          | 22850423 | 0 | NA  | 0      | G |
| 25 | BICF2P203867            | 22898994 | G | 0   | 0      | A |
| 25 | TIGRP2P326754_rs8462637 | 22937769 | 0 | 0   | 0      | G |
| 25 | BICF2P337378            | 22971093 | A | 0   | 0      | G |
| 25 | BICF2P1091633           | 22993015 | G | 0   | 0      | A |
| 25 | BICF2S23437181          | 23001518 | G | 0   | 0      | C |
| 25 | BICF2P414443            | 23011089 | C | 0   | 0      | A |
| 25 | BICF2S22948336          | 23041247 | G | 0   | 0      | A |
| 25 | BICF2P783141            | 23075522 | A | 0   | 0      | G |
| 25 | BICF2S23435951          | 23086816 | G | 0   | 0      | A |
| 25 | BICF2S23155266          | 23101197 | A | 0.5 | 0.6429 | G |
| 25 | TIGRP2P326761_rs8763377 | 23105910 | 0 | 0   | 0      | A |
| 25 | BICF2P362062            | 23126074 | 0 | 0   | 0      | A |
| 25 | BICF2S23434942          | 23148665 | A | 0   | 0      | C |
| 25 | BICF2P245449            | 23158897 | A | 0   | 0      | G |
| 25 | BICF2S23226348          | 23162190 | G | 0   | 0      | A |
| 25 | BICF2G63093596          | 23172737 | G | 0   | 0      | A |
| 25 | BICF2G63093601          | 23184973 | A | 1   | 1      | G |
| 25 | BICF2P560004            | 23196852 | 0 | 0   | 0      | G |
| 25 | BICF2G63093628          | 23221240 | A | 0.5 | 0.1429 | G |



|    |                         |          |   |     |        |   |
|----|-------------------------|----------|---|-----|--------|---|
| 25 | BICF2G63093653          | 23246425 | C | 0.5 | 0.1429 | A |
| 25 | BICF2P862614            | 23258426 | G | 0.5 | 0.6429 | A |
| 25 | BICF2G63093686          | 23279781 | G | 0   | 0.2143 | A |
| 25 | BICF2G63093695          | 23291287 | G | 0.5 | 0.8571 | A |
| 25 | BICF2G63093698          | 23302355 | A | 0.5 | 0.8571 | G |
| 25 | BICF2G63093709          | 23311969 | G | 0   | 0      | A |
| 25 | BICF2G63093723          | 23326725 | G | 0   | 0      | A |
| 25 | BICF2G63093736          | 23339992 | A | 0   | 0.2143 | G |
| 25 | BICF2G63093753          | 23363007 | G | 0   | 0      | A |
| 25 | BICF2S23011835          | 23376261 | G | 0.5 | 0.6429 | A |
| 25 | BICF2G63093769          | 23387115 | A | 0   | 0.2143 | C |
| 25 | BICF2G63093778          | 23394470 | T | 0   | 0.2143 | A |
| 25 | BICF2G63093793          | 23412521 | G | 0   | 0.2143 | A |
| 25 | BICF2G63093797          | 23415965 | G | 0.5 | 0.8571 | A |
| 25 | BICF2G63093815          | 23433844 | G | 0   | 0.2143 | A |
| 25 | BICF2G63093821          | 23440592 | A | 0   | 0.5    | G |
| 25 | BICF2G63093846          | 23455814 | C | 0   | 0.1667 | A |
| 25 | BICF2G63093863          | 23467693 | A | 0   | 0.2143 | G |
| 25 | BICF2G63093868          | 23472083 | G | 0   | 0.2143 | A |
| 25 | BICF2G63093889          | 23489946 | A | 0   | 0      | T |
| 25 | TIGRP2P326769_rs8662530 | 23502616 | A | 0.5 | 0.8571 | C |
| 25 | BICF2S23127151          | 23511828 | A | 0.5 | 0.6429 | C |
| 25 | BICF2G63093921          | 23528744 | G | 0.5 | 0.6429 | A |
| 25 | BICF2P1337844           | 23530520 | G | 0.5 | 0.8571 | A |
| 25 | BICF2G63093925          | 23546241 | G | 0.5 | 0.6429 | A |
| 25 | BICF2G63093942          | 23560070 | C | 0.5 | 0.6429 | A |
| 25 | BICF2S23738434          | 23570980 | G | 0.5 | 0.6429 | A |
| 25 | BICF2G63093963          | 23575537 | G | 0.5 | 0.6429 | A |
| 25 | BICF2G63093981          | 23588057 | G | 0.5 | 0.6429 | A |
| 25 | BICF2G63093997          | 23602189 | A | 0.5 | 0.6429 | C |
| 25 | BICF2G63094008          | 23615778 | A | 0   | 0.2143 | G |
| 25 | BICF2G63094010          | 23622576 | G | 0   | 0      | A |
| 25 | BICF2P244184            | 23635759 | A | 0.5 | 0.1429 | G |
| 25 | BICF2G63094043          | 23650987 | A | 0   | 0      | G |
| 25 | BICF2G63094047          | 23657478 | A | 1   | 0.7857 | G |
| 25 | TIGRP2P326785_rs8509320 | 23667228 | A | 0   | 0.2143 | G |
| 25 | BICF2G63094090          | 23688300 | G | 0.5 | 0.6429 | A |
| 25 | BICF2G63094098          | 23692741 | A | 0.5 | 0.6429 | G |
| 25 | BICF2G63094102          | 23702872 | A | 1   | 0.8333 | C |
| 25 | BICF2G63094118          | 23714503 | A | 0   | 0      | G |
| 25 | BICF2S23741731          | 23735065 | G | 0.5 | 0.6429 | A |
| 25 | BICF2G63094142          | 23737534 | G | 0.5 | 0.1429 | A |
| 25 | BICF2G63094152          | 23747930 | G | 0   | 0      | A |
| 25 | BICF2G63094177          | 23770060 | A | 0   | 0      | G |
| 25 | BICF2G63094181          | 23772340 | A | 0.5 | 0.6429 | G |
| 25 | TIGRP2P326803_rs8584772 | 23785479 | C | 0.5 | 0.1429 | A |
| 25 | BICF2G63094202          | 23798967 | G | 0   | 0      | A |

|    |                         |          |   |     |        |   |
|----|-------------------------|----------|---|-----|--------|---|
| 25 | BICF2G63094218          | 23805275 | A | 0   | 0      | G |
| 25 | BICF2G63094238          | 23818253 | G | 0   | 0      | A |
| 25 | BICF2S23518035          | 23828807 | A | 0.5 | 0.1429 | G |
| 25 | BICF2G63094260          | 23843231 | C | 0   | 0      | G |
| 25 | BICF2P1458061           | 23850981 | A | 0.5 | 0.6429 | G |
| 25 | BICF2P1458060           | 23852133 | A | 0.5 | 0.6429 | G |
| 25 | BICF2P878947            | 23863002 | C | 0   | 0      | A |
| 25 | BICF2P1158421           | 23874635 | 0 | 0   | 0      | A |
| 25 | BICF2P721347            | 23893722 | A | 0   | 0.2143 | C |
| 25 | BICF2P760513            | 23910462 | A | 1   | 0.7857 | G |
| 25 | BICF2P535892            | 23926794 | 0 | 0   | 0      | A |
| 25 | BICF2P119538            | 23946569 | A | 0   | 0      | G |
| 25 | BICF2P941485            | 23958807 | G | 0   | 0      | A |
| 25 | BICF2P636561            | 23974537 | A | 0   | 0      | G |
| 25 | BICF2P318920            | 23980153 | G | 0   | 0      | A |
| 25 | BICF2P86336             | 23991923 | 0 | 0   | 0      | A |
| 25 | BICF2P92268             | 24000526 | A | 1   | 0.7857 | G |
| 25 | BICF2P422558            | 24018268 | A | 0   | 0      | G |
| 25 | BICF2P1049282           | 24024375 | A | 0   | 0      | C |
| 25 | BICF2P258073            | 24035091 | C | 0   | 0      | A |
| 25 | BICF2P220526            | 24057046 | A | 0.5 | 0.6429 | G |
| 25 | BICF2P772860            | 24061094 | C | 0.5 | 0.6429 | A |
| 25 | BICF2P590481            | 24073769 | G | 0.5 | 0.6429 | A |
| 25 | BICF2P549143            | 24130056 | G | 0.5 | 0.6429 | C |
| 25 | BICF2S23447195          | 24147200 | A | 0.5 | 0.6429 | G |
| 25 | BICF2P641040            | 24160745 | A | 0.5 | 0.6429 | G |
| 25 | BICF2P1012648           | 24184481 | A | 0.5 | 0.6429 | G |
| 25 | BICF2P998087            | 24190832 | G | 0.5 | 0.3571 | A |
| 25 | BICF2P1025374           | 24196397 | A | 0.5 | 0.3571 | G |
| 25 | BICF2P805236            | 24210796 | C | 0   | 0.2143 | A |
| 25 | BICF2P539181            | 24219657 | 0 | 0   | 0      | T |
| 25 | TIGRP2P326808_rs8681817 | 24231675 | A | 0   | 0.2143 | T |
| 25 | BICF2P327092            | 24252637 | A | 0   | 0      | G |
| 25 | BICF2S24117233          | 24259797 | A | 0.5 | 0.8571 | G |
| 25 | BICF2P1079386           | 24269564 | G | 0.5 | 0.6429 | A |
| 25 | BICF2P1079383           | 24270144 | A | 0.5 | 0.8571 | G |
| 25 | BICF2P182195            | 24280203 | G | 0.5 | 0.6429 | A |
| 25 | BICF2S23619765          | 24293240 | G | 0.5 | 0.3571 | A |
| 25 | BICF2P749018            | 24306885 | A | 0   | 0      | G |
| 25 | BICF2P865408            | 24315413 | A | 0   | 0      | G |
| 25 | BICF2P456231            | 24323586 | G | 1   | 1      | A |
| 25 | BICF2S23414927          | 24340132 | G | 1   | 1      | A |
| 25 | BICF2S23521210          | 24346942 | A | 0   | 0      | G |
| 25 | BICF2S236314            | 24364469 | C | 0.5 | 0.1429 | G |
| 25 | BICF2P924041            | 24375725 | A | 0   | 0.2143 | G |
| 25 | BICF2P1179383           | 24383484 | G | 0.5 | 0.3571 | A |
| 25 | BICF2P1376936           | 24396430 | A | 0.5 | 0.6429 | G |

|    |                         |          |   |     |        |   |
|----|-------------------------|----------|---|-----|--------|---|
| 25 | BICF2S23011459          | 24430650 | G | 1   | 1      | A |
| 25 | BICF2P1060014           | 24439482 | 0 | 0   | 0      | A |
| 25 | BICF2P185316            | 24469700 | G | 0   | 0      | A |
| 25 | BICF2S23518866          | 24479501 | C | 0   | 0.2143 | A |
| 25 | BICF2P1356867           | 24493534 | A | 0.5 | 0.6429 | C |
| 25 | BICF2S23532324          | 24508858 | C | 0   | 0.2143 | A |
| 25 | BICF2S23427424          | 24519288 | A | 0   | 0      | G |
| 25 | BICF2P1299132           | 24539527 | G | 1   | 1      | A |
| 25 | BICF2P776998            | 24543985 | 0 | 0   | 0      | G |
| 25 | BICF2P454735            | 24561891 | A | 0   | 0      | G |
| 25 | BICF2P802148            | 24565124 | 0 | 0   | 0      | G |
| 25 | BICF2S23429109          | 24576970 | G | 1   | 1      | A |
| 25 | BICF2S23536335          | 24595771 | A | 0   | 0      | G |
| 25 | BICF2S23253095          | 24611424 | A | 0   | 0      | G |
| 25 | BICF2P182198            | 24627976 | A | 0   | 0      | G |
| 25 | BICF2P1021353           | 24636683 | A | 0   | 0.2143 | C |
| 25 | BICF2P297565            | 24650057 | G | 0   | 0.2143 | A |
| 25 | BICF2P76386             | 24660614 | A | 0   | 0      | G |
| 25 | BICF2P1148085           | 24671879 | A | 0   | 0      | C |
| 25 | BICF2P173709            | 24683246 | G | 0.5 | 0.6429 | A |
| 25 | BICF2S23537598          | 24700570 | G | 1   | 0.7857 | A |
| 25 | BICF2P813339            | 24704217 | A | 0.5 | 0.8571 | C |
| 25 | BICF2S23510975          | 24716202 | G | 0.5 | 0.1429 | A |
| 25 | BICF2P422060            | 24732542 | A | 0   | 0      | G |
| 25 | BICF2P699608            | 24739394 | G | 0   | 0      | A |
| 25 | BICF2P604554            | 24755010 | A | 0.5 | 0.1429 | G |
| 25 | BICF2P690068            | 24786532 | G | 0   | 0      | A |
| 25 | BICF2P823312            | 24803865 | 0 | 0   | 0      | A |
| 25 | BICF2P1391706           | 24815140 | G | 0.5 | 0.8571 | A |
| 25 | BICF2P873836            | 24822891 | A | 0   | 0.2143 | G |
| 25 | BICF2P580020            | 24830692 | G | 0.5 | 0.6429 | A |
| 25 | BICF2P171975            | 24840072 | G | 0.5 | 0.8571 | A |
| 25 | BICF2P389942            | 24851772 | A | 0.5 | 0.6429 | G |
| 25 | BICF2S22912306          | 24870271 | A | 0.5 | 0.3571 | G |
| 25 | BICF2P1026870           | 24882846 | C | 1   | 0.7857 | A |
| 25 | BICF2P519791            | 24898102 | A | 0   | 0.2143 | C |
| 25 | BICF2S23422963          | 24909469 | G | 1   | 0.7857 | A |
| 25 | BICF2P1044393           | 24921839 | A | 0   | 0.2143 | G |
| 25 | BICF2P1193016           | 24935165 | 0 | 0   | 0      | A |
| 25 | BICF2S2344105           | 24947801 | G | 0   | 0.2143 | A |
| 25 | BICF2S23437272          | 24971004 | T | 0   | 0      | A |
| 25 | BICF2S23428876          | 24992029 | G | 1   | 0.7857 | A |
| 25 | BICF2P114314            | 25011253 | A | 0   | 0      | G |
| 25 | BICF2S2413367           | 25012962 | 0 | 0   | 0      | T |
| 25 | BICF2P270747            | 25042818 | 0 | 0   | 0      | A |
| 25 | TIGRP2P326826_rs9203545 | 25067733 | 0 | 0   | 0      | C |
| 25 | BICF2P271434            | 25070447 | 0 | 0   | 0      | A |

|    |                         |          |   |     |        |   |
|----|-------------------------|----------|---|-----|--------|---|
| 25 | TIGRP2P326827_rs8932991 | 25091354 | 0 | 0   | 0      | A |
| 25 | BICF2S22913457          | 25112552 | A | 0   | 0      | G |
| 25 | BICF2S23529492          | 25117662 | A | 0.5 | 0.3571 | G |
| 25 | BICF2P834036            | 25134990 | 0 | 0   | 0      | C |
| 25 | TIGRP2P326828_rs9149740 | 25143007 | 0 | 0   | 0      | A |
| 25 | BICF2S23328700          | 25154357 | A | 0   | 0      | C |
| 25 | BICF2P209723            | 25171104 | 0 | 0   | 0      | A |
| 25 | BICF2S2348514           | 25182366 | A | 0   | 0      | G |
| 25 | BICF2S2348615           | 25185741 | A | 0   | 0      | G |
| 25 | BICF2P541976            | 25196723 | G | 0   | 0      | A |
| 25 | BICF2P509913            | 25211976 | G | 1   | 1      | A |
| 25 | BICF2P573325            | 25222737 | A | 0   | 0      | G |
| 25 | BICF2P139057            | 25229326 | A | 0.5 | 0.6429 | G |
| 25 | BICF2P1187023           | 25245712 | A | 0.5 | 0.6429 | G |
| 25 | BICF2S23032087          | 25270237 | A | 0   | 0      | G |
| 25 | BICF2P702774            | 25287108 | G | 0   | 0      | A |
| 25 | BICF2P1186338           | 25291483 | C | 0.5 | 0.6429 | A |
| 25 | TIGRP2P326834_rs9028837 | 25303838 | A | 0   | 0      | G |
| 25 | BICF2S23260261          | 25319703 | G | 0   | 0      | A |
| 25 | BICF2P276654            | 25333535 | G | 1   | 1      | A |
| 25 | BICF2P146425            | 25335172 | A | 1   | 1      | T |
| 25 | BICF2P1426120           | 25362762 | A | 0   | 0      | C |
| 25 | BICF2S23417604          | 25379068 | C | 0.5 | 0.6429 | A |
| 25 | BICF2S23412736          | 25388234 | A | 0.5 | 0.6429 | G |
| 25 | BICF2P6343              | 25394072 | C | 1   | 1      | A |
| 25 | BICF2S23552712          | 25407588 | A | 0.5 | 0.6429 | G |
| 25 | BICF2P1136594           | 25415283 | A | 0.5 | 0.3571 | G |
| 25 | BICF2P63910             | 25437190 | C | 0.5 | 0.6429 | G |
| 25 | BICF2S22931408          | 25447684 | G | 0.5 | 0.3571 | A |
| 25 | TIGRP2P326898_rs9030322 | 25460809 | A | 0   | 0      | C |
| 25 | BICF2P829595            | 25471486 | A | 0   | 0      | G |
| 25 | BICF2S23061407          | 25478005 | G | 0.5 | 0.3571 | A |
| 25 | BICF2S23610447          | 25496871 | A | 0.5 | 0.6429 | G |
| 25 | BICF2P1140543           | 25515445 | A | 0.5 | 0.6667 | G |
| 25 | BICF2P295851            | 25521903 | T | 0.5 | 0.6429 | A |
| 25 | BICF2S2298087           | 25549775 | 0 | 0   | 0      | A |
| 25 | BICF2P18101             | 25553206 | C | 0.5 | 0.6429 | G |
| 25 | BICF2P516472            | 25574559 | G | 0   | 0      | A |
| 25 | BICF2P620735            | 25577313 | A | 0   | 0      | T |
| 25 | BICF2P1127369           | 25603323 | G | 0   | 0      | A |
| 25 | BICF2P728249            | 25629024 | A | 0   | 0      | G |
| 25 | BICF2P92227             | 25647551 | A | 0   | 0      | G |
| 25 | BICF2S2292724           | 25661942 | A | 1   | 1      | G |
| 25 | BICF2S23519579          | 25671972 | A | 1   | 1      | T |
| 25 | TIGRP2P326976_rs8890140 | 25686971 | G | 0.5 | 0.3571 | A |
| 25 | BICF2P205884            | 25697478 | A | 0   | 0      | C |
| 25 | BICF2S2335741           | 25711353 | A | 1   | 1      | G |

|    |                         |          |   |     |        |   |
|----|-------------------------|----------|---|-----|--------|---|
| 25 | TIGRP2P327016_rs8652540 | 25718934 | A | 0.5 | 0.6429 | G |
| 25 | BICF2S23239767          | 25727818 | A | 0.5 | 0.3571 | G |
| 25 | TIGRP2P327025_rs8781777 | 25736750 | G | 0   | 0      | A |
| 25 | BICF2S23228531          | 25747962 | G | 0   | 0      | A |
| 25 | BICF2P267198            | 25758180 | A | 0   | 0      | G |
| 25 | TIGRP2P327029_rs9178352 | 25770864 | G | 0   | 0      | A |
| 25 | BICF2S23059620          | 25775116 | G | 0   | 0      | A |
| 25 | BICF2P1043667           | 25783764 | A | 0   | 0      | C |
| 25 | BICF2P405037            | 25804817 | G | 0.5 | 0.1429 | A |
| 25 | BICF2P1378459           | 25814075 | G | 1   | 1      | C |
| 25 | BICF2P1355644           | 25826032 | A | 0   | 0      | T |
| 25 | BICF2P1166727           | 25829357 | A | 1   | 1      | G |
| 25 | BICF2P871789            | 25840644 | A | 0   | 0      | G |
| 25 | BICF2P992693            | 25858811 | G | 0.5 | 0.1429 | A |
| 25 | BICF2S23131903          | 25866929 | C | 1   | 0.7857 | A |
| 25 | TIGRP2P327083_rs9138246 | 25876231 | A | 0   | 0.2143 | G |
| 25 | TIGRP2P327089_rs8778851 | 25888825 | A | 0   | 0.2143 | G |
| 25 | BICF2P306064            | 25900953 | A | 0   | 0.2143 | G |
| 25 | TIGRP2P327096_rs9064843 | 25912173 | A | 0.5 | 0.3571 | G |
| 25 | BICF2P1179542           | 25927327 | A | 0   | 0.2143 | C |
| 25 | BICF2S23155576          | 25935148 | G | 0   | 0.2143 | A |
| 25 | BICF2P32167             | 25945361 | A | 0.5 | 0.8571 | G |
| 25 | BICF2P263541            | 25956899 | G | NA  | 0.1429 | A |
| 25 | BICF2P242316            | 25981237 | 0 | 0   | 0      | A |
| 25 | BICF2P222213            | 26000062 | G | 0.5 | 0.1429 | A |
| 25 | BICF2P726664            | 26006340 | G | 0.5 | 0.1429 | A |
| 25 | BICF2P872848            | 26021961 | 0 | 0   | 0      | A |
| 25 | BICF2P1267290           | 26031224 | A | 0.5 | 0.3571 | G |
| 25 | BICF2S2294261           | 26037511 | C | NA  | 0.3    | A |
| 25 | BICF2P818712            | 26048826 | G | 0.5 | 0.3571 | A |
| 25 | BICF2P695461            | 26061394 | A | 0   | 0.2143 | C |
| 25 | BICF2P519223            | 26080631 | A | 1   | 1      | G |
| 25 | BICF2P134134            | 26086198 | 0 | 0   | 0      | A |
| 25 | BICF2S23640883          | 26110093 | G | 0   | 0.2143 | A |
| 25 | BICF2P690328            | 26124752 | 0 | 0   | 0      | C |
| 25 | BICF2P1210943           | 26137114 | 0 | 0   | 0      | A |
| 25 | BICF2P1099774           | 26146852 | A | 0.5 | 0.6429 | G |
| 25 | BICF2S22911058          | 26158228 | 0 | 0   | 0      | G |
| 25 | BICF2P1182114           | 26169147 | 0 | 0   | 0      | A |
| 25 | TIGRP2P327126_rs8981021 | 26190125 | 0 | 0   | 0      | A |
| 25 | BICF2P116575            | 26204622 | G | 0   | 0      | A |
| 25 | BICF2P601229            | 26213564 | G | 0   | 0      | A |
| 25 | BICF2P832557            | 26220790 | A | 0.5 | 0.3571 | C |
| 25 | BICF2P1287754           | 26233186 | A | 0.5 | 0.1429 | G |
| 25 | BICF2P1499710           | 26252946 | T | 1   | 1      | A |
| 25 | BICF2S2347156           | 26256005 | G | 1   | 1      | C |
| 25 | BICF2P1457399           | 26274247 | A | 0   | 0      | T |

|    |                         |          |   |     |        |   |
|----|-------------------------|----------|---|-----|--------|---|
| 25 | BICF2S23241474          | 26288304 | A | 0.5 | 0.3571 | G |
| 25 | BICF2P1009809           | 26290144 | A | 0.5 | 0.3571 | G |
| 25 | BICF2P605178            | 26310310 | G | 0.5 | 0.3571 | A |
| 25 | BICF2P798845            | 26312956 | C | 0.5 | 0.3571 | A |
| 25 | BICF2P630699            | 26334990 | G | 0.5 | 0.1429 | A |
| 25 | BICF2P604691            | 26337562 | A | 0   | 0      | G |
| 25 | TIGRP2P327151_rs8720823 | 26351723 | A | 0.5 | 0.3571 | G |
| 25 | BICF2P943103            | 26360376 | G | 0   | 0      | A |
| 25 | BICF2P112149            | 26392497 | A | 0   | 0      | G |
| 25 | BICF2P459706            | 26406445 | A | 0   | 0      | C |
| 25 | TIGRP2P327187_rs8633215 | 26420791 | A | 0   | 0      | G |
| 25 | BICF2P765254            | 26427645 | A | 0   | 0      | G |
| 25 | BICF2P189082            | 26442964 | A | 0   | 0      | G |
| 25 | BICF2P1241656           | 26456532 | A | 0.5 | 0.3571 | G |
| 25 | BICF2P566670            | 26464939 | A | 0.5 | 0.1429 | T |
| 25 | TIGRP2P327203_rs9211865 | 26473690 | A | 0.5 | 0.1429 | G |
| 25 | BICF2S2363417           | 26485350 | C | 0   | 0.2143 | A |
| 25 | BICF2P1105468           | 26500086 | A | 0.5 | 0.1429 | G |
| 25 | BICF2P1395480           | 26508088 | A | 0.5 | 0.1429 | G |
| 25 | BICF2P1214394           | 26519229 | G | 0.5 | 0.1429 | A |
| 25 | BICF2P415607            | 26533850 | G | 0   | 0.2143 | A |
| 25 | BICF2P1063033           | 26545533 | G | 0   | 0      | A |
| 25 | BICF2P1499571           | 26560803 | A | 0.5 | 0.1429 | C |
| 25 | BICF2P457224            | 26565875 | 0 | 0   | 0      | A |
| 25 | BICF2P299246            | 26577794 | A | 0.5 | 0.8571 | G |
| 25 | BICF2P786804            | 26594744 | A | 0.5 | 0.8571 | G |
| 25 | BICF2P1227427           | 26606730 | C | NA  | 0      | A |
| 25 | BICF2S2365989           | 26612063 | G | 0   | 0      | A |
| 25 | BICF2P432321            | 26624743 | G | 1   | 1      | A |
| 25 | BICF2P59701             | 26636156 | A | 0   | 0      | C |
| 25 | BICF2P945823            | 26649533 | G | 0   | 0      | A |
| 25 | BICF2P1210358           | 26651971 | A | 0   | 0      | G |
| 25 | TIGRP2P327262_rs9002864 | 26665207 | C | 0   | 0.2143 | A |
| 25 | BICF2S23321609          | 26674873 | 0 | 0   | 0      | G |
| 25 | BICF2P1086471           | 26684726 | A | 1   | 1      | G |
| 25 | BICF2P243177            | 26700956 | G | 1   | 0.7857 | A |
| 25 | BICF2S23140663          | 26708244 | A | 0   | 0      | G |
| 25 | BICF2P1165443           | 26714586 | 0 | 0   | 0      | A |
| 25 | BICF2P182192            | 26736306 | 0 | 0   | 0      | G |
| 25 | TIGRP2P327282_rs8789692 | 26745543 | A | 1   | 0.7857 | G |
| 25 | BICF2S23112888          | 26749334 | G | 0   | 0      | A |
| 25 | BICF2P566293            | 26762050 | 0 | 0   | 0      | A |
| 25 | BICF2S23056261          | 26779863 | G | 1   | 0.7857 | A |
| 25 | BICF2P167368            | 26790185 | G | 0   | 0      | A |
| 25 | BICF2S23253958          | 26796167 | A | 0   | 0      | G |
| 25 | BICF2S23141109          | 26814693 | 0 | 0   | 0      | A |
| 25 | BICF2P921617            | 26820376 | 0 | 0   | 0      | G |

|    |                         |          |   |   |        |   |
|----|-------------------------|----------|---|---|--------|---|
| 25 | BICF2P581011            | 26839154 | C | 0 | 0.2143 | A |
| 25 | BICF2P708931            | 26841448 | 0 | 0 | 0      | G |
| 25 | BICF2P823431            | 26861496 | G | 1 | 0.7857 | A |
| 25 | TIGRP2P327298_rs9255255 | 26868424 | C | 0 | 0      | A |
| 25 | BICF2P356556            | 26880498 | G | 1 | 0.7857 | A |
| 25 | BICF2P1058737           | 26896331 | G | 1 | 0.7857 | A |
| 25 | BICF2P1012960           | 26902171 | C | 0 | 0.2143 | G |
| 25 | BICF2P405811            | 26918413 | C | 1 | 0.7857 | A |
| 25 | BICF2S23322547          | 26932635 | C | 1 | 1      | A |
| 25 | BICF2S23052386          | 26935751 | C | 1 | 1      | A |
| 25 | BICF2S23254793          | 26953845 | G | 1 | 1      | A |
| 25 | TIGRP2P327322_rs8794079 | 26966884 | G | 0 | 0      | C |
| 25 | BICF2P738855            | 26972516 | G | 0 | 0      | A |
| 25 | BICF2P660694            | 26986699 | G | 0 | 0      | A |
| 25 | BICF2P68237             | 26999280 | G | 0 | 0.2143 | C |
| 25 | BICF2S23634140          | 27010370 | 0 | 0 | 0      | G |
| 25 | BICF2P558512            | 27020238 | 0 | 0 | 0      | A |
| 25 | BICF2P16507             | 27032974 | A | 0 | 0      | G |
| 25 | TIGRP2P327327_rs8933208 | 27038132 | G | 0 | 0      | A |
| 25 | TIGRP2P327332_rs8825825 | 27054955 | G | 0 | 0.2143 | C |
| 25 | TIGRP2P327337_rs8877108 | 27069856 | G | 0 | 0      | A |
| 25 | BICF2P1073663           | 27076580 | G | 1 | 0.7857 | A |
| 25 | BICF2P1051833           | 27087015 | A | 0 | 0      | G |
| 25 | BICF2S23752592          | 27096671 | A | 1 | 1      | G |
| 25 | TIGRP2P327348_rs8594822 | 27105706 | A | 0 | 0      | G |
| 25 | BICF2P272169            | 27118118 | A | 0 | 0.2143 | G |
| 25 | BICF2P322102            | 27134047 | G | 0 | 0.2143 | A |
| 25 | BICF2S23225310          | 27149322 | C | 0 | 0      | A |
| 25 | BICF2S23526986          | 27151773 | A | 0 | 0      | C |
| 25 | TIGRP2P327357_rs8941729 | 27171287 | C | 0 | 0      | A |
| 25 | BICF2S2346623           | 27180369 | A | 0 | 0      | C |
| 25 | TIGRP2P327359_rs9167181 | 27187542 | C | 1 | 1      | A |
| 25 | BICF2P352622            | 27216922 | A | 1 | 0.7857 | C |
| 25 | TIGRP2P327367_rs9067652 | 27225291 | 0 | 0 | 0      | A |
| 25 | TIGRP2P327375_rs9002871 | 27243309 | T | 0 | 0.2143 | A |
| 25 | BICF2P747163            | 27244921 | A | 0 | 0.2143 | T |
| 25 | BICF2P86659             | 27264678 | G | 0 | 0      | A |
| 25 | BICF2P1361425           | 27277899 | G | 0 | 0.2143 | A |
| 25 | BICF2P1361423           | 27278323 | A | 0 | 0.2143 | G |
| 25 | BICF2S23514086          | 27286329 | C | 0 | 0.2143 | A |
| 25 | BICF2P450413            | 27293666 | 0 | 0 | 0      | A |
| 25 | BICF2P501452            | 27311711 | C | 1 | 0.7857 | G |
| 25 | BICF2P909384            | 27320335 | A | 1 | 0.7857 | C |
| 25 | BICF2P618186            | 27332401 | A | 1 | 0.7857 | G |
| 25 | TIGRP2P327409_rs9064866 | 27338535 | G | 1 | 0.7857 | A |
| 25 | BICF2P259832            | 27347224 | A | 1 | 0.7857 | C |
| 25 | BICF2P399823            | 27367611 | G | 0 | 0      | A |

|    |                         |          |   |     |        |   |
|----|-------------------------|----------|---|-----|--------|---|
| 25 | BICF2S23053913          | 27374429 | A | 0   | 0.2143 | C |
| 25 | BICF2G63094280          | 27382824 | A | 1   | 0.7857 | G |
| 25 | BICF2S23349480          | 27394238 | A | 0   | 0      | G |
| 25 | TIGRP2P327423_rs9065869 | 27412068 | A | 0   | 0      | G |
| 25 | BICF2P1418953           | 27416887 | A | 0.5 | 0.1429 | G |
| 25 | BICF2P559569            | 27432856 | A | 0.5 | 0.1429 | C |
| 25 | BICF2P638264            | 27446536 | G | 0   | 0.2143 | A |
| 25 | BICF2P1265315           | 27461384 | A | 0   | 0.2143 | C |
| 25 | BICF2G63094296          | 27480241 | G | 0.5 | 0.3571 | A |
| 25 | BICF2G63094315          | 27494044 | G | 0   | 0      | A |
| 25 | BICF2G63094318          | 27496678 | A | 0.5 | 0.75   | C |
| 25 | BICF2G63094320          | 27497374 | A | 0   | 0      | G |
| 25 | BICF2G63094322          | 27520199 | 0 | 0   | 0      | G |
| 25 | BICF2G63094325          | 27545285 | 0 | 0   | 0      | G |
| 25 | BICF2S2317316           | 27557971 | G | 0   | 0      | A |
| 25 | BICF2G63094342          | 27568368 | G | 0   | 0      | A |
| 25 | BICF2G63094355          | 27583158 | A | 0.5 | 0.1429 | G |
| 25 | BICF2G63094363          | 27590228 | A | 1   | 0.7857 | G |
| 25 | BICF2P1050240           | 27608839 | G | 0   | 0      | A |
| 25 | BICF2P556152            | 27622369 | A | 0.5 | 0.1429 | G |
| 25 | BICF2G63094384          | 27627106 | A | 0.5 | 0.1429 | C |
| 25 | BICF2G63094390          | 27639197 | T | 0.5 | 0.8571 | A |
| 25 | BICF2G63094392          | 27646168 | T | 0   | 0      | A |
| 25 | BICF2S23149670          | 27646221 | C | 0   | 0      | A |
| 25 | BICF2G63094396          | 27653314 | G | 0.5 | 0.1429 | A |
| 25 | BICF2G63094397          | 27653617 | A | 0.5 | 0.1429 | G |
| 25 | BICF2G63094404          | 27659875 | G | 0   | 0      | A |
| 25 | BICF2G63094427          | 27681070 | C | 0   | 0.2143 | A |
| 25 | BICF2G63094434          | 27693451 | G | 1   | 1      | A |
| 25 | BICF2G63094451          | 27709177 | A | 0   | 0      | G |
| 25 | BICF2P344551            | 27718106 | 0 | 0   | 0      | A |
| 25 | BICF2P1361980           | 27726968 | G | 0.5 | 0.3571 | A |
| 25 | BICF2P582445            | 27738362 | A | 0.5 | 0      | G |
| 25 | BICF2S23712322          | 27749531 | G | 0   | 0      | A |
| 25 | BICF2P1231301           | 27769013 | A | 0.5 | 0.3571 | G |
| 25 | BICF2P1329950           | 27781314 | G | 0.5 | 0.1429 | C |
| 25 | BICF2P911364            | 27792982 | A | 0.5 | 0.6429 | G |
| 25 | BICF2P396236            | 27829719 | A | 0.5 | 0.8571 | G |
| 25 | TIGRP2P327453_rs9088696 | 27833761 | A | 0.5 | 0.7857 | G |
| 25 | BICF2S23335118          | 27843503 | C | 0.5 | 0.6429 | G |
| 25 | BICF2S24114308          | 27856564 | G | 0   | 0.1667 | A |
| 25 | TIGRP2P327470_rs8752312 | 27867020 | A | 0   | 0      | G |
| 25 | TIGRP2P327475_rs8514085 | 27880599 | A | 0.5 | 0.6429 | G |
| 25 | TIGRP2P327483_rs9193115 | 27896429 | A | 0.5 | 0.1429 | G |
| 25 | TIGRP2P327486_rs8938146 | 27904381 | G | 0.5 | 0.3571 | A |
| 25 | BICF2P471428            | 27915635 | G | 0.5 | 0.3571 | A |
| 25 | BICF2P1082276           | 27931930 | G | 0.5 | 0.1429 | A |



|    |                         |          |   |     |        |   |
|----|-------------------------|----------|---|-----|--------|---|
| 25 | BICF2P1097576           | 27940420 | A | 0   | 0.2143 | G |
| 25 | BICF2S23040611          | 27947256 | G | 0.5 | 0.3571 | A |
| 25 | BICF2P1027715           | 27966100 | A | 0   | 0.3571 | C |
| 25 | TIGRP2P327501_rs9118675 | 27977086 | G | 0   | 0      | A |
| 25 | BICF2G63094467          | 27983615 | 0 | 0   | 0      | G |
| 25 | BICF2G63094490          | 27995455 | C | 0   | 0      | G |
| 25 | BICF2P876428            | 28006568 | G | 0   | 0.2143 | C |
| 25 | BICF2S23510807          | 28025243 | A | 0.5 | 0.6429 | G |
| 25 | BICF2S23217198          | 28026800 | A | 0.5 | 0.8571 | G |
| 25 | BICF2P721589            | 28044988 | C | 1   | 0.6429 | A |
| 25 | BICF2P313530            | 28051255 | A | 0   | 0      | C |
| 25 | BICF2P262740            | 28067293 | 0 | 0   | 0      | G |
| 25 | BICF2P734937            | 28094765 | A | 0.5 | 0.1429 | G |
| 25 | BICF2G63094501          | 28107059 | A | 0   | 0      | G |
| 25 | BICF2G63094515          | 28121218 | C | 0   | 0      | A |
| 25 | BICF2G63094529          | 28138895 | G | 0   | 0.2143 | A |
| 25 | BICF2S23053495          | 28141743 | G | 0   | 0      | A |
| 25 | BICF2G63094545          | 28158662 | A | 0.5 | 0.7143 | G |
| 25 | BICF2G63094557          | 28164427 | A | 0   | 0      | C |
| 25 | BICF2G63094575          | 28175621 | G | 0.5 | 0.3571 | A |
| 25 | BICF2G63094588          | 28189694 | A | 0   | 0      | C |
| 25 | BICF2G63094638          | 28216244 | G | 0.5 | 0.3571 | A |
| 25 | BICF2G63094644          | 28223114 | G | 0.5 | 0.3571 | A |
| 25 | BICF2G63094671          | 28237105 | A | 0.5 | 0.2857 | G |
| 25 | BICF2G63094680          | 28247139 | G | 1   | 0.6429 | A |
| 25 | BICF2G63094712          | 28259565 | G | 0   | 0      | A |
| 25 | BICF2G63094740          | 28276084 | C | 1   | 0.6429 | A |
| 25 | BICF2G63094746          | 28291891 | G | 1   | 1      | A |
| 25 | BICF2G63094754          | 28303489 | G | 1   | 1      | A |
| 25 | BICF2P337004            | 28313917 | A | 1   | 1      | G |
| 25 | TIGRP2P327529_rs8986847 | 28341039 | C | 1   | 1      | A |
| 25 | BICF2P858755            | 28356431 | A | 1   | 1      | G |
| 25 | BICF2P450899            | 28379041 | G | 1   | 1      | A |
| 25 | BICF2P278794            | 28397318 | 0 | 0   | 0      | A |
| 25 | BICF2G63094772          | 28435891 | A | 0.5 | 0.2857 | G |
| 25 | BICF2S2344969           | 28442021 | A | 0.5 | 0.2857 | G |
| 25 | BICF2G63094787          | 28453019 | A | 0   | 0      | G |
| 25 | BICF2G63094814          | 28467240 | C | 0.5 | 0.5    | G |
| 25 | BICF2G63094840          | 28485162 | A | 0.5 | 0.5    | G |
| 25 | BICF2G63094853          | 28500405 | A | 0.5 | 0.5    | G |
| 25 | BICF2G63094856          | 28504401 | A | 0.5 | 0.5    | G |
| 25 | BICF2S2365327           | 28509087 | A | 0.5 | 0.2857 | G |
| 25 | BICF2S22952827          | 28523316 | A | NA  | 0.25   | G |
| 25 | BICF2G63094891          | 28534200 | A | 0.5 | 0.5    | G |
| 25 | BICF2G63094900          | 28547270 | A | 0   | 0      | G |
| 25 | BICF2G63094922          | 28558139 | A | 0   | 0      | G |
| 25 | TIGRP2P327597_rs8669090 | 28575597 | T | 0.5 | 0.6429 | A |

|    |                         |          |   |     |        |   |
|----|-------------------------|----------|---|-----|--------|---|
| 25 | TIGRP2P327600_rs8806292 | 28579566 | A | 0.5 | 0.6429 | G |
| 25 | BICF2P457367            | 28596391 | A | 0.5 | 0.6429 | G |
| 25 | BICF2G63094965          | 28621700 | A | 0.5 | 0.2857 | G |
| 25 | BICF2P926437            | 28631463 | A | 0   | 0.2143 | G |
| 25 | BICF2G63094989          | 28645242 | C | 0   | 0.2143 | A |
| 25 | BICF2G63094997          | 28660137 | A | NA  | 0.7    | C |
| 25 | BICF2G63095003          | 28671347 | C | 0.5 | 0.6429 | G |
| 25 | BICF2G63095015          | 28681761 | A | 0.5 | 0.2857 | G |
| 25 | TIGRP2P327630_rs8648592 | 28682094 | G | 0   | 0.3571 | A |
| 25 | BICF2G63095023          | 28695169 | A | 0.5 | 0.1429 | G |
| 25 | BICF2G63095035          | 28704031 | A | 0   | 0      | G |
| 25 | TIGRP2P327641_rs8531636 | 28718251 | A | 1   | 0.4286 | G |
| 25 | BICF2G63095053          | 28732185 | A | 0   | 0.5714 | G |
| 25 | BICF2G63095058          | 28738664 | A | 0   | 0      | G |
| 25 | BICF2G63095091          | 28761037 | A | 0   | 0      | G |
| 25 | TIGRP2P327667_rs8881527 | 28772691 | G | 1   | 0.4286 | A |
| 25 | BICF2P292322            | 28791238 | G | 0.5 | 0.1429 | C |
| 25 | BICF2G63095133          | 28797923 | G | 0   | 0.3571 | A |
| 25 | BICF2G63095162          | 28811303 | A | 0   | 0.2143 | C |
| 25 | BICF2P613995            | 28825432 | 0 | 0   | 0      | A |
| 25 | TIGRP2P327686_rs8687905 | 28833666 | G | 0   | 0.5714 | A |
| 25 | TIGRP2P327700_rs8648670 | 28849303 | A | 0   | 0.5833 | G |
| 25 | G1290f21S220            | 28872519 | A | 0.5 | 0.7143 | G |
| 25 | BICF2S23335045          | 28900545 | C | 0.5 | 0.5    | G |
| 25 | BICF2P1001256           | 28921495 | A | 0.5 | 0.1429 | G |
| 25 | BICF2P1001250           | 28923652 | A | 0   | 0      | G |
| 25 | BICF2P968782            | 28938434 | C | 0.5 | 0.3571 | A |
| 25 | TIGRP2P327708_rs9148637 | 28950622 | A | 0   | 0.2143 | G |
| 25 | BICF2P298191            | 28960163 | G | 0   | 0      | A |
| 25 | BICF2P726741            | 28974413 | C | 0   | 0      | A |
| 25 | BICF2P140959            | 28994756 | A | 0   | 0      | G |
| 25 | BICF2P986356            | 29013136 | T | 0   | 0.2143 | A |
| 25 | BICF2P211498            | 29021093 | G | 0   | 0.2143 | A |
| 25 | TIGRP2P327716_rs9077246 | 29030161 | G | 0.5 | 0.5    | A |
| 25 | TIGRP2P327725_rs9185876 | 29042431 | A | 0.5 | 0.5    | G |
| 25 | TIGRP2P327727_rs8646779 | 29054789 | T | 0   | 0      | A |
| 25 | BICF2P1249115           | 29066443 | A | 0.5 | 0.5    | C |
| 25 | BICF2P286568            | 29073103 | A | 0.5 | 0.7143 | G |
| 25 | BICF2P933234            | 29087246 | A | 0   | 0      | G |
| 25 | BICF2P60017             | 29100476 | G | 1   | 1      | A |
| 25 | BICF2P1209962           | 29110586 | A | 0.5 | 0.2857 | G |
| 25 | TIGRP2P327739_rs8716264 | 29125483 | A | 0.5 | 0.1429 | G |
| 25 | BICF2P1289071           | 29131593 | C | 0   | 0      | A |
| 25 | TIGRP2P327743_rs8895412 | 29141053 | A | 0   | 0      | G |
| 25 | BICF2P98964             | 29162149 | G | 0.5 | 0.1429 | A |
| 25 | BICF2S2292500           | 29172844 | A | 0.5 | 0.2857 | G |
| 25 | BICF2S2321735           | 29178211 | G | 0.5 | 0.2857 | A |

|    |                         |          |   |     |        |   |
|----|-------------------------|----------|---|-----|--------|---|
| 25 | BICF2P702684            | 29195143 | G | 0.5 | 0.5    | A |
| 25 | BICF2P1052311           | 29201353 | G | 0   | 0.2143 | A |
| 25 | BICF2S23057685          | 29201543 | 0 | 0   | 0      | A |
| 25 | TIGRP2P327760_rs8808693 | 29220995 | A | 0.5 | 0.8571 | C |
| 25 | BICF2P1392705           | 29229793 | G | 0   | 0.3571 | A |
| 25 | BICF2P1222687           | 29240670 | G | 0.5 | 0.5    | A |
| 25 | BICF2P306450            | 29246316 | A | 0.5 | 0.5    | T |
| 25 | BICF2S23148152          | 29257802 | T | 0   | 0.2143 | A |
| 25 | BICF2S23762016          | 29277557 | A | 0.5 | 0.3571 | C |
| 25 | BICF2S23762208          | 29281285 | G | 0   | 0.5714 | A |
| 25 | BICF2G63095187          | 29298903 | G | 0   | 0.2143 | A |
| 25 | BICF2S23129266          | 29306495 | A | 0.5 | 0.3333 | G |
| 25 | BICF2G63095195          | 29321329 | 0 | 0   | 0      | G |
| 25 | BICF2S2295809           | 29327388 | A | 1   | 0.7857 | G |
| 25 | BICF2G63095196          | 29345801 | G | 0.5 | 0.5    | A |
| 25 | BICF2S23040620          | 29358837 | G | 1   | 0.7857 | A |
| 25 | BICF2S22915744          | 29360847 | G | 1   | 0.7857 | A |
| 25 | G1291f52S109            | 29395983 | A | 0   | 0.2143 | G |
| 25 | BICF2S23060299          | 29438154 | A | 0.5 | 0.1429 | T |
| 25 | BICF2G63095251          | 29450707 | A | 1   | 0.4286 | G |
| 25 | BICF2G63095252          | 29452156 | A | 0   | 0.3571 | G |
| 25 | BICF2G63095281          | 29463356 | A | 0.5 | 0.6429 | G |
| 25 | BICF2G63095301          | 29485667 | A | 0.5 | 0.1429 | G |
| 25 | BICF2G63095302          | 29485983 | A | 0.5 | 0.6429 | G |
| 25 | BICF2G63095312          | 29490533 | A | 0.5 | 0.6429 | G |
| 25 | BICF2G63095323          | 29501262 | G | 0.5 | 0.5    | A |
| 25 | BICF2G63095335          | 29515786 | G | 0   | 0.2143 | C |
| 25 | BICF2G63095342          | 29523831 | G | 1   | 0.6429 | A |
| 25 | BICF2G63095358          | 29534687 | 0 | 0   | 0      | A |
| 25 | BICF2P1025839           | 29558631 | G | 0.5 | 0.1429 | A |
| 25 | BICF2G63095391          | 29566662 | A | 0.5 | 0.1429 | G |
| 25 | BICF2G63095407          | 29578325 | G | 1   | 1      | A |
| 25 | BICF2P105881            | 29593088 | G | 0.5 | 0.1429 | A |
| 25 | BICF2G63095467          | 29609342 | G | 0.5 | 0.1429 | A |
| 25 | BICF2G63095472          | 29626078 | A | 0.5 | 0.6429 | G |
| 25 | BICF2G63095500          | 29645752 | G | 0.5 | 0.2857 | A |
| 25 | BICF2G63095509          | 29649717 | G | 0.5 | 0.2857 | A |
| 25 | BICF2G63095533          | 29658977 | A | 0.5 | 0.2857 | G |
| 25 | BICF2G63095567          | 29671618 | G | 0.5 | 0.8571 | A |
| 25 | BICF2G63095608          | 29693487 | C | 0.5 | 0.8571 | A |
| 25 | BICF2G63095630          | 29713336 | A | 0.5 | 0.8571 | G |
| 25 | BICF2G63095645          | 29736474 | A | 0.5 | 0.1429 | G |
| 25 | BICF2G63095650          | 29758499 | G | 0.5 | 0.6429 | A |
| 25 | BICF2G63095651          | 29767165 | A | 0.5 | 0.1429 | G |
| 25 | BICF2G63095656          | 29779763 | G | 0.5 | 0.6429 | A |
| 25 | BICF2G63095663          | 29787757 | A | 0.5 | 0.2857 | G |
| 25 | BICF2G63095671          | 29799585 | A | 0.5 | 0.2857 | C |

|    |                |          |   |     |        |   |
|----|----------------|----------|---|-----|--------|---|
| 25 | BICF2G63095673 | 29802277 | A | 0.5 | 0.1429 | G |
| 25 | BICF2G63095684 | 29809403 | G | 0.5 | 0.2857 | A |
| 25 | BICF2S24115743 | 29822851 | 0 | 0   | 0      | A |
| 25 | BICF2S23530899 | 29834469 | A | 1   | 0.7857 | G |
| 25 | BICF2G63095688 | 29864490 | G | 0.5 | 0.7143 | A |
| 25 | BICF2P1168126  | 29876312 | G | 0.5 | 0.5    | A |
| 25 | BICF2S23534846 | 29879486 | G | 1   | 0.7857 | A |
| 25 | BICF2G63095760 | 29889176 | A | 0.5 | 0.2857 | G |
| 25 | BICF2P1316685  | 29921242 | 0 | 0   | 0      | G |
| 25 | BICF2S2443935  | 29925745 | 0 | 0   | 0      | A |
| 25 | BICF2G63095765 | 29935748 | G | 0.5 | 0.2857 | A |
| 25 | BICF2G63095769 | 29967508 | G | 0.5 | 0.5    | A |
| 25 | BICF2G63095785 | 29970703 | C | 0.5 | 0.5    | A |
| 25 | BICF2G63095787 | 29977944 | A | 0.5 | 0.5    | G |
| 25 | BICF2G63095791 | 29980933 | G | 0.5 | 0.5    | A |
| 25 | BICF2P62930    | 30012268 | 0 | 0   | 0      | C |
| 25 | BICF2P730539   | 30020534 | C | 0.5 | 0.1429 | G |
| 25 | BICF2G63095822 | 30030063 | G | 0.5 | 0.5    | A |
| 25 | BICF2P1321466  | 30040139 | 0 | 0   | 0      | A |
| 25 | BICF2P463633   | 30055838 | G | 0.5 | 0.25   | A |
| 25 | BICF2G63095842 | 30065899 | G | 0.5 | 0.5    | A |
| 25 | BICF2G63095879 | 30078294 | G | 0.5 | 0.5    | A |
| 25 | BICF2S23046789 | 30101489 | A | 0   | 0.2143 | G |
| 25 | BICF2G63095891 | 30113007 | G | 0.5 | 0.5    | A |
| 25 | BICF2G63095895 | 30122609 | C | 0.5 | 0.1429 | A |
| 25 | BICF2G63095904 | 30135874 | G | 0.5 | 0.5    | A |
| 25 | BICF2G63095908 | 30142213 | A | 0.5 | 0.2857 | G |
| 25 | BICF2G63095915 | 30162280 | G | 0   | 0      | A |
| 25 | BICF2G63095922 | 30164948 | A | 0   | 0      | G |
| 25 | BICF2G63095943 | 30178173 | A | 0   | 0      | G |
| 25 | BICF2G63095975 | 30195798 | G | 0   | 0      | A |
| 25 | BICF2S23750643 | 30208682 | G | 0.5 | 0.6429 | A |
| 25 | BICF2P915886   | 30227279 | G | 1   | 1      | A |
| 25 | BICF2P915884   | 30227418 | G | 1   | 1      | A |
| 25 | BICF2S23331142 | 30229608 | G | 0.5 | 0.6429 | A |
| 25 | BICF2S23040802 | 30233557 | G | 1   | 1      | A |
| 25 | BICF2G63095992 | 30253160 | G | 1   | 1      | A |
| 25 | BICF2S23734042 | 30264806 | A | 0.5 | 0.6429 | G |
| 25 | BICF2G63096007 | 30273993 | A | 0.5 | 0.8571 | G |
| 25 | BICF2G63096009 | 30287705 | A | 0   | 0      | G |
| 25 | BICF2G63096026 | 30292838 | G | 0.5 | 0.1429 | A |
| 25 | BICF2G63096049 | 30313606 | G | 1   | 1      | A |
| 25 | BICF2G63096050 | 30313696 | G | 0.5 | 0.8571 | C |
| 25 | BICF2G63096052 | 30314588 | G | 0.5 | 0.8571 | A |
| 25 | BICF2P482485   | 30338012 | G | 0.5 | 0.3571 | A |
| 25 | BICF2G63096072 | 30355268 | A | 1   | 1      | G |
| 25 | BICF2G63096077 | 30360146 | G | 0.5 | 0.8571 | A |

|    |                         |          |   |     |        |   |
|----|-------------------------|----------|---|-----|--------|---|
| 25 | BICF2G63096086          | 30373872 | G | 0.5 | 0.3571 | A |
| 25 | BICF2G63096097          | 30384184 | C | 0.5 | 0.3571 | A |
| 25 | TIGRP2P327889_rs8602307 | 30405177 | G | 1   | 0.7857 | A |
| 25 | BICF2G63096111          | 30406533 | A | 0.5 | 0.6429 | G |
| 25 | BICF2S23658503          | 30418557 | A | 0   | 0      | G |
| 25 | BICF2P916074            | 30434399 | T | 1   | 0.7857 | A |
| 25 | BICF2G63096145          | 30444813 | G | 0.5 | 0.6429 | A |
| 25 | BICF2S23615589          | 30459723 | G | 0   | 0      | A |
| 25 | BICF2G63096165          | 30471663 | G | 1   | 0.7857 | A |
| 25 | BICF2P1158262           | 30483517 | A | 0.5 | 0.1429 | C |
| 25 | BICF2S23621197          | 30484858 | G | 0   | 0      | A |
| 25 | BICF2G63096199          | 30487968 | A | 0   | 0      | G |
| 25 | BICF2G63096212          | 30508753 | A | 1   | 1      | G |
| 25 | BICF2G63096215          | 30511067 | A | 1   | 1      | C |
| 25 | BICF2G63096229          | 30523320 | C | 1   | 1      | A |
| 25 | BICF2G63096239          | 30533128 | G | 1   | 1      | A |
| 25 | BICF2G63096275          | 30554676 | G | 0.5 | 0.8571 | A |
| 25 | BICF2G63096303          | 30560452 | A | 0   | 0      | C |
| 25 | TIGRP2P327954_rs8988894 | 30567313 | G | 0.5 | 0.1429 | A |
| 25 | BICF2G63096341          | 30587150 | A | 0   | 0      | G |
| 25 | BICF2G63096371          | 30609401 | A | 0   | 0      | G |
| 25 | BICF2G63096372          | 30616250 | A | 0   | 0      | G |
| 25 | BICF2G63096400          | 30632406 | O | 0   | 0      | G |
| 25 | BICF2G63096414          | 30637991 | G | 0   | 0      | A |
| 25 | BICF2G63096422          | 30649416 | A | 0   | 0.2143 | G |
| 25 | BICF2G63096429          | 30660686 | G | 0   | 0.2143 | A |
| 25 | BICF2G63096438          | 30674777 | A | 0   | 0.2143 | G |
| 25 | BICF2P563446            | 30684040 | A | 0   | 0.2143 | C |
| 25 | BICF2G63096456          | 30685115 | G | 0.5 | 0.1429 | A |
| 25 | BICF2P1128747           | 30695177 | G | 0   | 0.3571 | A |
| 25 | BICF2P741357            | 30712516 | O | 0   | 0      | G |
| 25 | TIGRP2P328030_rs9238476 | 30732617 | G | 0.5 | 0.6429 | A |
| 25 | BICF2S23143617          | 30749511 | G | 0.5 | 0.3571 | A |
| 25 | BICF2G63096461          | 30753667 | A | 0   | 0      | G |
| 25 | BICF2G63096485          | 30766530 | G | 1   | 0.7857 | A |
| 25 | BICF2G63096494          | 30778353 | A | 1   | 0.8333 | G |
| 25 | BICF2G63096500          | 30791615 | G | 0   | 0.3571 | A |
| 25 | BICF2G63096503          | 30800265 | G | 0   | 0.3571 | A |
| 25 | BICF2G63096505          | 30811703 | A | 0   | 0.2143 | G |
| 25 | BICF2P615642            | 30821757 | A | 0   | 0.2143 | G |
| 25 | BICF2G63096506          | 30834716 | A | 0   | 0.2143 | G |
| 25 | BICF2G63096516          | 30843063 | G | 0   | 0.2143 | A |
| 25 | TIGRP2P328041_rs9138771 | 30857097 | C | 0.5 | 0.3571 | A |
| 25 | BICF2G63096534          | 30866389 | O | 0   | 0      | G |
| 25 | BICF2G63096543          | 30882168 | G | 0.5 | 0.1429 | A |
| 25 | BICF2S23350450          | 30890527 | A | 0.5 | 0.3571 | G |
| 25 | BICF2G63096552          | 30896656 | A | 0   | 0.2143 | C |

|    |                         |          |   |     |        |   |
|----|-------------------------|----------|---|-----|--------|---|
| 25 | BICF2G63096555          | 30903406 | A | 0.5 | 0.1429 | C |
| 25 | BICF2G63096575          | 30925861 | A | 0.5 | 0.1429 | G |
| 25 | BICF2P551150            | 30937114 | T | 0   | 0      | A |
| 25 | BICF2G63096608          | 30955538 | A | 0   | 0      | C |
| 25 | BICF2G63096610          | 30960135 | G | 0   | 0      | A |
| 25 | BICF2G63096620          | 30973547 | T | 1   | 1      | A |
| 25 | BICF2P316025            | 30984165 | G | 0.5 | 0.8571 | A |
| 25 | TIGRP2P328051_rs8783860 | 30999412 | 0 | 0   | 0      | G |
| 25 | BICF2G63096633          | 31013061 | A | 1   | 0.6429 | G |
| 25 | BICF2G63096636          | 31017273 | A | 1   | 0.6429 | G |
| 25 | BICF2G63096658          | 31027207 | G | 0.5 | 0.5    | A |
| 25 | BICF2G63096672          | 31039345 | A | 0.5 | 0.2857 | G |
| 25 | BICF2G63096711          | 31058381 | G | 0.5 | 0.7143 | A |
| 25 | BICF2G63096720          | 31062211 | A | 0.5 | 0.2857 | C |
| 25 | BICF2G63096765          | 31078190 | G | 0.5 | 0.2857 | A |
| 25 | BICF2G63096770          | 31083243 | C | 0.5 | 0.2857 | A |
| 25 | BICF2G63096774          | 31085035 | G | 0.5 | 0.2857 | A |
| 25 | BICF2G63096800          | 31101794 | A | 0   | 0.5714 | G |
| 25 | BICF2G63096807          | 31108212 | A | 0.5 | 0.2857 | G |
| 25 | TIGRP2P328068_rs8568667 | 31126060 | G | 0.5 | 0.1429 | A |
| 25 | BICF2P721866            | 31144009 | A | 0.5 | 0.8571 | G |
| 25 | BICF2P1151597           | 31158893 | A | 0.5 | 0.1429 | G |
| 25 | BICF2P1151598           | 31159042 | A | 0   | 0.5714 | G |
| 25 | BICF2G63096818          | 31160759 | 0 | 0   | 0      | A |
| 25 | TIGRP2P328076_rs8791149 | 31165997 | G | 0.5 | 0.1429 | A |
| 25 | BICF2G63096820          | 31178236 | G | 0   | 0.3571 | A |
| 25 | BICF2P517449            | 31205389 | 0 | 0   | 0      | A |
| 25 | BICF2G63096837          | 31238345 | A | 0   | 0.5714 | G |
| 25 | BICF2G63096839          | 31238971 | A | 0   | 0.5714 | G |
| 25 | BICF2G63096855          | 31255515 | G | 0   | 0      | A |
| 25 | BICF2G63096859          | 31258191 | A | 0   | 0.2143 | G |
| 25 | BICF2G63096879          | 31271708 | G | 0   | 0      | A |
| 25 | BICF2G63096882          | 31290910 | A | 0.5 | 0.2857 | G |
| 25 | TIGRP2P328083_rs8699849 | 31294605 | 0 | 0   | 0      | G |
| 25 | BICF2G63096889          | 31311468 | G | 0.5 | 0.2857 | C |
| 25 | BICF2G63096890          | 31319082 | G | 0.5 | 0.25   | A |
| 25 | BICF2G63096893          | 31330939 | G | 0.5 | 0.2857 | A |
| 25 | BICF2G63096898          | 31346858 | A | 0.5 | 0.2857 | G |
| 25 | BICF2G63096900          | 31350898 | A | 0.5 | 0.2857 | G |
| 25 | BICF2G63096902          | 31361164 | G | 0.5 | 0.2857 | A |
| 25 | BICF2P1091351           | 31374613 | A | 0.5 | 0.2857 | G |
| 25 | BICF2G63096911          | 31385521 | A | 0   | 0      | G |
| 25 | BICF2G63096918          | 31395215 | G | 0.5 | 0.2857 | A |
| 25 | BICF2G63096934          | 31406601 | A | 0.5 | 0.2857 | G |
| 25 | BICF2G63096943          | 31427715 | A | 1   | 0.4286 | G |
| 25 | BICF2P740589            | 31437464 | G | 1   | 0.4286 | A |
| 25 | BICF2P740588            | 31437789 | A | 0.5 | 0.2857 | G |

|    |                         |          |   |     |        |   |
|----|-------------------------|----------|---|-----|--------|---|
| 25 | BICF2G63096948          | 31445607 | A | 1   | 0.4286 | G |
| 25 | BICF2G63096953          | 31458185 | A | 0.5 | 0.2857 | G |
| 25 | BICF2G63096960          | 31464449 | A | 0   | 0      | G |
| 25 | BICF2G63096977          | 31482779 | A | 0   | 0      | G |
| 25 | BICF2G63096986          | 31487495 | C | 0.5 | 0.2857 | A |
| 25 | BICF2P1131464           | 31504490 | 0 | 0   | 0      | G |
| 25 | BICF2G63096995          | 31514363 | G | 0   | 0      | A |
| 25 | BICF2G63097000          | 31536956 | C | 1   | 0.3333 | A |
| 25 | BICF2G63097011          | 31548819 | 0 | 0   | 0      | A |
| 25 | BICF2G63097030          | 31562665 | G | 1   | 0.4286 | A |
| 25 | BICF2G63097044          | 31570584 | A | 1   | 0.4    | C |
| 25 | BICF2G63097056          | 31580631 | A | 1   | 0.4286 | G |
| 25 | BICF2G63097067          | 31592127 | G | 0   | 0      | A |
| 25 | BICF2G63097085          | 31610640 | C | 1   | 0.4286 | A |
| 25 | BICF2G63097090          | 31616168 | A | 1   | 0.4286 | G |
| 25 | BICF2G63097107          | 31636345 | T | 1   | 0.4286 | A |
| 25 | BICF2G63097114          | 31641134 | A | 1   | 0.4286 | C |
| 25 | BICF2G63097121          | 31648575 | G | 0.5 | 0.2857 | A |
| 25 | BICF2G63097129          | 31662118 | G | 1   | 0.4286 | A |
| 25 | BICF2P605423            | 31672961 | G | 0.5 | 0.1429 | A |
| 25 | BICF2G63097135          | 31690201 | G | 0   | 0      | A |
| 25 | BICF2G63097141          | 31704565 | A | 0   | 0      | G |
| 25 | TIGRP2P328107_rs8908871 | 31714774 | 0 | 0   | 0      | T |
| 25 | BICF2G63097147          | 31722847 | 0 | 0   | 0      | G |
| 25 | BICF2G63097151          | 31733975 | A | 0.5 | 0.1429 | G |
| 25 | BICF2P798820            | 31744584 | A | 0   | 0.2143 | G |
| 25 | BICF2G63097157          | 31760309 | A | 0   | 0      | G |
| 25 | BICF2P1715              | 31763133 | G | 0   | 0.2143 | A |
| 25 | BICF2G63097161          | 31767138 | G | 0   | 0.6    | A |
| 25 | BICF2G63097169          | 31776190 | A | 0   | 0.5714 | G |
| 25 | BICF2G63097205          | 31795279 | C | 0   | 0.5714 | A |
| 25 | BICF2G63097219          | 31806187 | A | 0   | 0.5714 | T |
| 25 | BICF2G63097228          | 31817113 | A | 1   | 0.4286 | G |
| 25 | BICF2G63097234          | 31821553 | A | 0   | 0      | C |
| 25 | BICF2G63097249          | 31832333 | C | 0   | 0      | A |
| 25 | BICF2G63097272          | 31850269 | G | 0   | 0.2143 | A |
| 25 | BICF2G63097282          | 31857582 | G | 0   | 0.1667 | A |
| 25 | BICF2G63097308          | 31874603 | G | 0   | 0      | A |
| 25 | TIGRP2P328140_rs9027241 | 31883433 | C | 0.5 | 0.1429 | A |
| 25 | BICF2P1234348           | 31896402 | A | 0.5 | 0.1429 | C |
| 25 | BICF2P650204            | 31912339 | T | 0   | 0.3571 | A |
| 25 | BICF2G63097320          | 31918105 | A | 0.5 | 0.1429 | G |
| 25 | BICF2G63097325          | 31922302 | A | 0   | 0.2143 | G |
| 25 | BICF2G63097350          | 31941009 | A | 0.5 | 0.2857 | G |
| 25 | BICF2G63097380          | 31949476 | G | 0   | 0      | A |
| 25 | TIGRP2P328160_rs8552977 | 31960327 | 0 | 0   | 0      | A |
| 25 | BICF2G63097386          | 31971819 | A | 0   | 0      | G |

|    |                         |          |   |     |        |   |
|----|-------------------------|----------|---|-----|--------|---|
| 25 | BICF2G63097393          | 31985487 | A | 0   | 0.3571 | G |
| 25 | BICF2G63097397          | 31998963 | A | 0   | 0      | G |
| 25 | BICF2S23014867          | 32012150 | A | 0   | 0.3571 | G |
| 25 | BICF2G63097402          | 32020024 | A | 0   | 0      | G |
| 25 | TIGRP2P328168_rs8838924 | 32047121 | G | 0   | 0      | A |
| 25 | BICF2P601252            | 32057036 | A | 0   | 0      | C |
| 25 | BICF2G63097411          | 32064295 | C | 0   | 0.3571 | A |
| 25 | BICF2G63097428          | 32081746 | 0 | 0   | 0      | G |
| 25 | BICF2G63097432          | 32088523 | A | 0.5 | 0.2857 | G |
| 25 | BICF2G63097437          | 32095113 | A | 0.5 | 0.2857 | C |
| 25 | TIGRP2P328171_rs8825774 | 32100987 | G | 0.5 | 0.1429 | A |
| 25 | BICF2G63097445          | 32113735 | G | 0   | 0      | A |
| 25 | BICF2G63097456          | 32126867 | G | 0.5 | 0.1429 | A |
| 25 | BICF2G63097468          | 32139680 | A | 0.5 | 0.2857 | G |
| 25 | BICF2S23622361          | 32141449 | C | 0   | 0      | G |
| 25 | BICF2G63097483          | 32143744 | C | 0   | 0      | G |
| 25 | BICF2G63097486          | 32158861 | A | 0   | 0      | G |
| 25 | BICF2G63097487          | 32167877 | G | 0   | 0      | A |
| 25 | BICF2G63097499          | 32180266 | A | 0   | 0      | G |
| 25 | BICF2S23032222          | 32184160 | T | 0   | 0      | A |
| 25 | TIGRP2P328185_rs8697128 | 32188674 | A | 0   | 0      | G |
| 25 | BICF2G63097520          | 32203266 | G | 0   | 0      | A |
| 25 | BICF2G63097528          | 32212648 | A | 0   | 0      | G |
| 25 | BICF2G63097546          | 32232875 | C | 0.5 | 0.5    | A |
| 25 | BICF2G63097551          | 32238364 | A | 1   | 1      | G |
| 25 | BICF2G63097561          | 32247217 | G | 0.5 | 0.3571 | A |
| 25 | BICF2G63097590          | 32260467 | A | 0.5 | 0.7143 | G |
| 25 | BICF2G63097602          | 32269540 | A | 0.5 | 0.7143 | G |
| 25 | BICF2G63097610          | 32291847 | G | 0.5 | 0.3    | A |
| 25 | BICF2G63097613          | 32293070 | A | 0.5 | 0.3571 | C |
| 25 | BICF2G63097665          | 32340631 | G | 0   | 0      | A |
| 25 | BICF2G63097678          | 32350359 | A | 0.5 | 0.7143 | G |
| 25 | BICF2G63097703          | 32371593 | T | 1   | 0.4286 | A |
| 25 | BICF2G63097713          | 32381265 | A | 1   | 0.4286 | G |
| 25 | BICF2P610839            | 32384482 | G | 0   | 0      | A |
| 25 | BICF2G63097746          | 32396666 | A | 1   | 0.6429 | G |
| 25 | TIGRP2P328214_rs9090932 | 32409528 | 0 | 0   | 0      | G |
| 25 | BICF2P1081972           | 32425193 | A | 1   | 1      | G |
| 25 | BICF2P1147355           | 32433865 | G | 1   | 0.7857 | A |
| 25 | BICF2G63097770          | 32448623 | A | 0.5 | 0.6429 | C |
| 25 | BICF2G63097772          | 32458680 | A | 0.5 | 0.1429 | G |
| 25 | BICF2G63097780          | 32465267 | A | 0.5 | 0.8571 | G |
| 25 | BICF2G63097804          | 32476716 | C | NA  | 0.1429 | A |
| 25 | BICF2G63097860          | 32491722 | G | 0.5 | 0.1429 | A |
| 25 | BICF2P1274501           | 32508745 | A | 0   | 0      | G |
| 25 | BICF2P1211625           | 32519124 | G | 0   | 0.2143 | A |
| 25 | BICF2P389501            | 32532681 | C | 0   | 0      | A |



|    |                         |          |   |     |        |   |
|----|-------------------------|----------|---|-----|--------|---|
| 25 | BICF2P711562            | 32536251 | G | 0   | 0      | A |
| 25 | BICF2P846022            | 32546275 | G | 0   | 0.2143 | A |
| 25 | BICF2G63097874          | 32559989 | G | 0.5 | 0.5    | A |
| 25 | BICF2P1047051           | 32568094 | A | 1   | 1      | G |
| 25 | BICF2G63097881          | 32583530 | A | 0   | 0      | G |
| 25 | BICF2G63097887          | 32591262 | 0 | 0   | 0      | G |
| 25 | BICF2P617416            | 32610770 | G | 0.5 | 0.6429 | A |
| 25 | BICF2G63097918          | 32611409 | G | 0   | 0      | A |
| 25 | BICF2P482276            | 32614298 | A | 0   | 0      | G |
| 25 | TIGRP2P328288_rs9094899 | 32626350 | A | 0   | 0      | G |
| 25 | BICF2P114203            | 32643632 | A | 1   | 1      | G |
| 25 | BICF2G63097955          | 32649915 | A | 0.5 | 0.5    | G |
| 25 | TIGRP2P328303_rs8531882 | 32659782 | C | 1   | 1      | A |
| 25 | BICF2G63097981          | 32660792 | A | 1   | 1      | G |
| 25 | BICF2G63098015          | 32676559 | G | 1   | 0.7857 | A |
| 25 | BICF2G63098037          | 32683160 | C | 1   | 1      | A |
| 25 | BICF2G63098055          | 32700368 | A | 0   | 0      | G |
| 25 | BICF2P188056            | 32706287 | A | 1   | 1      | G |
| 25 | BICF2P343122            | 32725546 | T | 0   | 0      | A |
| 25 | BICF2P891040            | 32736153 | A | 0   | 0.2143 | C |
| 25 | BICF2G63098061          | 32742160 | 0 | 0   | 0      | A |
| 25 | TIGRP2P328328_rs9136796 | 32756863 | G | 0   | 0.2143 | A |
| 25 | BICF2G63098096          | 32772794 | 0 | 0   | 0      | A |
| 25 | BICF2G63098098          | 32776528 | G | 0   | 0.2143 | A |
| 25 | BICF2G63098106          | 32788171 | 0 | 0   | 0      | G |
| 25 | BICF2G63098114          | 32801775 | A | 0   | 0      | G |
| 25 | BICF2G63098119          | 32816365 | G | 0   | 0.2143 | A |
| 25 | BICF2G63098120          | 32825665 | 0 | 0   | 0      | A |
| 25 | BICF2G63098126          | 32838370 | A | 0   | 0      | G |
| 25 | BICF2G63098163          | 32849582 | 0 | 0   | 0      | C |
| 25 | BICF2G63098171          | 32857651 | 0 | 0   | 0      | A |
| 25 | BICF2G63098189          | 32869594 | G | 0   | 0.2143 | A |
| 25 | BICF2P417024            | 32887765 | A | 0   | 0.2143 | G |
| 25 | BICF2S23619651          | 32899679 | A | 0.5 | 0.1429 | G |
| 25 | BICF2G63098200          | 32910281 | A | 0   | 0      | C |
| 25 | BICF2S22925806          | 32915279 | C | 0   | 0.2143 | A |
| 25 | BICF2G63098202          | 32926544 | A | 0   | 0      | C |
| 25 | BICF2G63098218          | 32943471 | G | 1   | 0.6429 | A |
| 25 | BICF2G63098227          | 32949740 | A | 0.5 | 0.1429 | G |
| 25 | BICF2P523103            | 32969661 | A | 0   | 0      | G |
| 25 | BICF2S23355154          | 32977379 | A | 0   | 0.3571 | G |
| 25 | BICF2G63098257          | 32986891 | A | 0.5 | 0.2857 | G |
| 25 | TIGRP2P328388_rs9011733 | 32995077 | A | 0.5 | 0.2857 | G |
| 25 | BICF2G63098274          | 33005804 | G | 0   | 0      | A |
| 25 | BICF2G63098297          | 33021996 | C | 0   | 0      | A |
| 25 | BICF2S23631293          | 33031112 | C | 0.5 | 0.8571 | A |
| 25 | BICF2G63098327          | 33041063 | A | 0.5 | 0.5    | G |

|    |                         |          |   |     |        |   |
|----|-------------------------|----------|---|-----|--------|---|
| 25 | TIGRP2P328400_rs8505412 | 33058302 | G | 0.5 | 0.8571 | A |
| 25 | BICF2S23351296          | 33071665 | A | 0.5 | 0.8571 | G |
| 25 | BICF2G63098345          | 33083134 | A | 0.5 | 0.8571 | G |
| 25 | BICF2G63098358          | 33090207 | G | 0   | 0.5714 | A |
| 25 | BICF2G63098367          | 33098854 | A | 0   | 0.5714 | G |
| 25 | BICF2G63098370          | 33100674 | A | 0   | 0.5714 | G |
| 25 | BICF2G63098383          | 33117193 | A | 0.5 | 0.7143 | C |
| 25 | TIGRP2P328430_rs9163676 | 33125451 | A | 0   | 0.5714 | G |
| 25 | TIGRP2P328432_rs8958711 | 33134643 | A | 0   | 0.3571 | G |
| 25 | BICF2P1279020           | 33145540 | T | 0.5 | 0.8571 | A |
| 25 | BICF2G63098396          | 33160431 | A | 0   | 0      | G |
| 25 | BICF2G63098417          | 33171067 | A | 0.5 | 0.6429 | G |
| 25 | BICF2G63098421          | 33173454 | A | 0.5 | 0.6429 | G |
| 25 | BICF2G63098442          | 33185514 | G | 0.5 | 0.1429 | A |
| 25 | BICF2G63098460          | 33197314 | A | 0.5 | 0.5    | G |
| 25 | BICF2S2372192           | 33197438 | G | 0   | 0      | A |
| 25 | TIGRP2P328460_rs8794249 | 33202484 | A | 0   | 0      | G |
| 25 | BICF2G63098467          | 33216188 | A | 0   | 0      | G |
| 25 | BICF2G63098485          | 33229989 | A | 0.5 | 0.3571 | G |
| 25 | BICF2G63098510          | 33236750 | G | 0.5 | 0.1429 | A |
| 25 | BICF2G63098533          | 33253675 | A | 0.5 | 0.5    | G |
| 25 | BICF2G63098549          | 33262554 | C | 0   | 0.2143 | A |
| 25 | BICF2G63098561          | 33279234 | G | 0.5 | 0.5    | A |
| 25 | BICF2S23260635          | 33284155 | A | 0   | 0      | C |
| 25 | BICF2G63098562          | 33300802 | A | 0   | 0.3571 | G |
| 25 | TIGRP2P328477_rs9139817 | 33311191 | 0 | 0   | 0      | A |
| 25 | BICF2G63098589          | 33318104 | A | 0.5 | 0.6429 | G |
| 25 | BICF2P1008016           | 33330380 | A | 0.5 | 0.2857 | G |
| 25 | BICF2G63098604          | 33343025 | A | 0   | 0.2143 | G |
| 25 | BICF2G63098621          | 33354047 | A | 0.5 | 0.2857 | G |
| 25 | BICF2G63098653          | 33372486 | A | 0.5 | 0.2857 | G |
| 25 | BICF2G63098669          | 33384487 | A | 0.5 | 0.2857 | G |
| 25 | TIGRP2P328489_rs8572802 | 33399316 | A | 0   | 0      | G |
| 25 | BICF2G63098703          | 33412249 | G | 0.5 | 0.2857 | A |
| 25 | BICF2G63098734          | 33426770 | A | 0.5 | 0.2857 | G |
| 25 | BICF2G63098759          | 33437968 | G | 0.5 | 0.2857 | A |
| 25 | BICF2G63098771          | 33445036 | G | 0.5 | 0.2857 | A |
| 25 | BICF2S23044151          | 33455832 | A | 0   | 0      | G |
| 25 | BICF2S2335803           | 33465447 | A | 0.5 | 0.6429 | G |
| 25 | BICF2G63098853          | 33478157 | G | 0.5 | 0.5833 | A |
| 25 | BICF2P929835            | 33489095 | A | 0   | 0      | G |
| 25 | BICF2P919324            | 33492386 | A | 0   | 0      | G |
| 25 | BICF2G63098906          | 33506734 | G | 0   | 0      | A |
| 25 | BICF2G63098913          | 33521677 | A | 0   | 0      | G |
| 25 | BICF2G63098921          | 33526181 | G | 0   | 0      | A |
| 25 | BICF2G63098936          | 33537955 | C | 0   | 0      | A |
| 25 | BICF2S2331235           | 33548408 | A | 0   | 0      | G |

|    |                         |          |   |     |        |   |
|----|-------------------------|----------|---|-----|--------|---|
| 25 | BICF2G63098960          | 33557745 | G | 0   | 0      | A |
| 25 | BICF2G63098985          | 33579709 | G | 1   | 1      | A |
| 25 | BICF2G63098986          | 33580272 | G | 0.5 | 0.6429 | C |
| 25 | BICF2P259055            | 33599500 | 0 | 0   | 0      | G |
| 25 | BICF2G63099022          | 33614247 | C | 0.5 | 0.6429 | G |
| 25 | BICF2G63099034          | 33619112 | A | 0   | 0.3571 | G |
| 25 | BICF2G63099046          | 33629625 | A | 0.5 | 0.2857 | G |
| 25 | BICF2P646552            | 33644123 | G | 1   | 0.6429 | A |
| 25 | BICF2P986045            | 33649407 | A | 0   | 0      | G |
| 25 | BICF2G63099114          | 33662203 | G | 1   | 1      | A |
| 25 | BICF2P932252            | 33680740 | A | 0.5 | 0.1429 | C |
| 25 | BICF2P281685            | 33693643 | G | 0   | 0.2143 | A |
| 25 | BICF2G63099159          | 33705001 | G | 0.5 | 0.8571 | A |
| 25 | BICF2P253507            | 33711679 | C | 0   | 0.3571 | G |
| 25 | BICF2S23764728          | 33716596 | A | 0.5 | 0.1429 | G |
| 25 | BICF2G63099178          | 33722717 | G | 0   | 0.2143 | A |
| 25 | BICF2S23738331          | 33723057 | A | 0   | 0.3571 | T |
| 25 | BICF2G63099236          | 33749408 | A | 0   | 0.2143 | G |
| 25 | BICF2G63099242          | 33760210 | T | 0   | 0      | A |
| 25 | TIGRP2P328608_rs8905114 | 33764329 | G | 0   | 0.5714 | A |
| 25 | BICF2P1100182           | 33773410 | A | 0   | 0.5714 | T |
| 25 | BICF2S24312723          | 33784450 | T | 0   | 0.3571 | A |
| 25 | BICF2P1029036           | 33789428 | A | 0   | 0.3571 | G |
| 25 | BICF2G63099296          | 33799269 | A | 0   | 0      | G |
| 25 | BICF2G63099305          | 33811242 | C | 0   | 0      | A |
| 25 | BICF2P84371             | 33821533 | A | 0   | 0      | G |
| 25 | BICF2P6698              | 33835158 | A | 0.5 | 0.3571 | G |
| 25 | BICF2P453774            | 33845842 | G | 0.5 | 0.3    | A |
| 25 | BICF2P290041            | 33848521 | G | 0.5 | 0.3571 | A |
| 25 | BICF2P582229            | 33850138 | C | 0   | 0      | A |
| 25 | BICF2G63099343          | 33860515 | A | 0   | 0      | G |
| 25 | BICF2G63099370          | 33871598 | A | 0.5 | 0.3571 | C |
| 25 | BICF2S23519048          | 33879063 | A | 0.5 | 0.3571 | C |
| 25 | BICF2P867064            | 33890765 | A | 0   | 0.3571 | G |
| 25 | TIGRP2P328654_rs8512855 | 33906224 | 0 | 0   | 0      | A |
| 25 | BICF2S23018297          | 33919794 | A | 1   | 0.6429 | G |
| 25 | BICF2G63099444          | 33930263 | A | 0   | 0      | G |
| 25 | BICF2S23519748          | 33937179 | G | 0   | 0.5714 | A |
| 25 | BICF2G63099487          | 33950189 | A | 0.5 | 0.5    | G |
| 25 | BICF2G63099509          | 33960775 | G | 0   | 0      | A |
| 25 | BICF2G63099515          | 33962314 | G | 0.5 | 0.1429 | A |
| 25 | BICF2P402696            | 33978264 | G | 0   | 0      | A |
| 25 | BICF2G63099554          | 33992766 | A | 1   | 1      | G |
| 25 | BICF2G63099561          | 33998994 | G | 1   | 1      | A |
| 25 | BICF2G63099588          | 34012807 | G | 0   | 0.3571 | A |
| 25 | BICF2G63099608          | 34021440 | G | 0   | 0      | A |
| 25 | BICF2G63099625          | 34032121 | A | 0.5 | 0.1429 | G |

|    |                         |          |   |     |        |   |
|----|-------------------------|----------|---|-----|--------|---|
| 25 | BICF2P1382432           | 34040917 | G | 0.5 | 0.7143 | A |
| 25 | BICF2P526972            | 34062524 | A | 0.5 | 0.1429 | C |
| 25 | BICF2S23018314          | 34063792 | G | 0.5 | 0.5    | A |
| 25 | BICF2P663724            | 34077947 | C | 0   | 0      | A |
| 25 | BICF2G63099663          | 34089477 | A | 0   | 0.2143 | G |
| 25 | BICF2G63099671          | 34101200 | A | 0   | 0.2143 | C |
| 25 | BICF2P473716            | 34113918 | 0 | 0   | 0      | A |
| 25 | BICF2P501715            | 34135920 | 0 | 0   | 0      | A |
| 25 | BICF2G63099689          | 34150641 | G | 0   | 0.3571 | A |
| 25 | BICF2G63099736          | 34176960 | C | 0   | 0.3571 | A |
| 25 | BICF2G63099746          | 34188338 | A | 0   | 0.3571 | G |
| 25 | BICF2G63099748          | 34192815 | G | 0   | 0.3571 | A |
| 25 | BICF2G63099751          | 34205192 | A | 0   | 0.3571 | G |
| 25 | BICF2G63099760          | 34216065 | A | 0   | 0.3571 | G |
| 25 | BICF2G63099767          | 34224164 | G | 0   | 0.3571 | A |
| 25 | BICF2G63099797          | 34239390 | G | 0   | 0.3571 | A |
| 25 | BICF2G63099810          | 34256514 | A | 0   | 0.3571 | G |
| 25 | BICF2G63099814          | 34273218 | G | 0.5 | 0.1429 | A |
| 25 | BICF2G63099827          | 34282404 | A | 0   | 0.2143 | G |
| 25 | BICF2G63099833          | 34293042 | A | 1   | 0.7857 | G |
| 25 | BICF2G63099852          | 34312908 | G | 1   | 0.4286 | A |
| 25 | TIGRP2P328729_rs8604078 | 34317633 | C | 0   | 0      | A |
| 25 | BICF2G63099859          | 34317761 | G | 1   | 0.7857 | A |
| 25 | TIGRP2P328732_rs8604077 | 34320733 | A | 0.5 | 0.2857 | G |
| 25 | BICF2G63099877          | 34330025 | G | 1   | 0.7857 | A |
| 25 | BICF2P612959            | 34342577 | A | 0.5 | 0.1429 | G |
| 25 | BICF2P882478            | 34351692 | G | 0.5 | 0.1429 | C |
| 25 | BICF2P927341            | 34368179 | G | 1   | 0.6429 | C |
| 25 | BICF2P1087073           | 34380338 | A | 0.5 | 0.3571 | G |
| 25 | BICF2P1086649           | 34389978 | A | 0   | 0      | G |
| 25 | BICF2G63099883          | 34400667 | A | 0.5 | 0.1429 | G |
| 25 | BICF2P1149585           | 34410632 | G | 0   | 0.2143 | A |
| 25 | BICF2P1076478           | 34426937 | A | 0.5 | 0.1429 | C |
| 25 | BICF2P1075906           | 34437235 | G | 0.5 | 0.2857 | A |
| 25 | BICF2P316093            | 34449565 | G | 0.5 | 0.2857 | A |
| 25 | BICF2G63099889          | 34456394 | G | 0.5 | 0.2857 | A |
| 25 | TIGRP2P328792_rs9178794 | 34467799 | 0 | 0   | 0      | G |
| 25 | BICF2G63099922          | 34478541 | A | 0   | 0.2143 | G |
| 25 | BICF2S23249392          | 34494482 | A | 0.5 | 0.2857 | G |
| 25 | BICF2G63099944          | 34500994 | A | 0.5 | 0.3571 | G |
| 25 | BICF2G63099962          | 34512849 | G | 0.5 | 0.5    | A |
| 25 | BICF2S23736436          | 34529666 | 0 | 0   | 0      | C |
| 25 | BICF2P1330344           | 34534961 | A | 0   | 0      | C |
| 25 | BICF2G630100019         | 34549096 | A | 0   | 0      | G |
| 25 | BICF2G630100032         | 34560607 | A | 1   | 1      | G |
| 25 | BICF2G630100034         | 34561954 | A | 0   | 0.3571 | G |
| 25 | TIGRP2P328813_rs9017715 | 34579686 | A | 0.5 | 0.5    | G |

|    |                         |          |   |     |         |   |
|----|-------------------------|----------|---|-----|---------|---|
| 25 | BICF2G630100043         | 34587072 | G | 0.5 | 0.08333 | A |
| 25 | BICF2P568275            | 34599665 | C | 0.5 | 0.1429  | A |
| 25 | BICF2G630100054         | 34604596 | G | 0   | 0       | A |
| 25 | BICF2G630100063         | 34615165 | A | 1   | 0.7857  | G |
| 25 | BICF2S22917149          | 34631091 | 0 | 0   | 0       | G |
| 25 | BICF2G630100075         | 34638645 | C | 0   | 0       | A |
| 25 | BICF2S23422685          | 34659431 | G | 0   | 0       | A |
| 25 | BICF2P1192709           | 34672183 | A | 0   | 0       | G |
| 25 | BICF2G630100090         | 34688200 | A | 0   | 0       | G |
| 25 | BICF2G630100094         | 34689509 | A | 0   | 0       | T |
| 25 | BICF2G630100114         | 34706906 | A | 0   | 0       | G |
| 25 | BICF2G630100129         | 34720916 | T | 0   | 0       | A |
| 25 | BICF2P630829            | 34733623 | 0 | 0   | 0       | A |
| 25 | BICF2G630100157         | 34757484 | A | 0.5 | 0.3571  | C |
| 25 | BICF2P1349139           | 34775547 | C | 0.5 | 0.5     | G |
| 25 | BICF2G630100197         | 34783041 | A | 0   | 0.1667  | G |
| 25 | BICF2P750143            | 34796604 | G | 0   | 0       | A |
| 25 | BICF2G630100209         | 34802950 | G | 0   | 0.2143  | A |
| 25 | TIGRP2P328852_rs8515667 | 34822112 | A | 0   | 0.2143  | C |
| 25 | BICF2G630100251         | 34837371 | G | 0   | 0.2143  | A |
| 25 | TIGRP2P328863_rs8658652 | 34862672 | A | 0   | 0.2143  | G |
| 25 | TIGRP2P328865_rs8709447 | 34874565 | A | 0.5 | 0.1429  | G |
| 25 | BICF2G630100257         | 34890335 | A | 0   | 0.3571  | G |
| 25 | BICF2G630100260         | 34893234 | C | 1   | 0.4286  | A |
| 25 | BICF2G630100288         | 34911496 | A | 0   | 0       | G |
| 25 | BICF2G630100310         | 34915601 | A | 0   | 0       | G |
| 25 | BICF2P683246            | 34917875 | G | 0   | 0.2143  | A |
| 25 | BICF2G630100323         | 34926482 | G | 1   | 0.6429  | A |
| 25 | BICF2G630100341         | 34939931 | C | 0   | 0.3571  | A |
| 25 | BICF2G630100360         | 34953480 | A | 0   | 0.3571  | G |
| 25 | BICF2G630100393         | 34960164 | G | 0   | 0.3571  | A |
| 25 | BICF2G630100410         | 34978554 | A | 0   | 0.3571  | G |
| 25 | BICF2G630100419         | 34984626 | G | 0   | 0.2143  | A |
| 25 | BICF2G630100446         | 34998504 | G | 0   | 0       | A |
| 25 | BICF2P820229            | 35008813 | C | 0   | 0       | A |
| 25 | BICF2P809103            | 35021066 | A | 0   | 0       | G |
| 25 | BICF2G630100467         | 35032238 | A | 0   | 0       | G |
| 25 | BICF2S23219613          | 35058053 | A | 0   | 0       | G |
| 25 | BICF2G630100504         | 35065919 | G | 0   | 0       | A |
| 25 | BICF2G630100527         | 35077955 | A | 0   | 0.2143  | C |
| 25 | BICF2G630100543         | 35090928 | A | 0   | 0.2143  | G |
| 25 | BICF2G630100556         | 35101338 | 0 | 0   | 0       | C |
| 25 | BICF2G630100573         | 35110266 | A | 0.5 | 0.2857  | G |
| 25 | BICF2P1047516           | 35128495 | A | 0.5 | 0.5     | C |
| 25 | BICF2P1047515           | 35128532 | A | 0   | 0       | G |
| 25 | BICF2P1176218           | 35143142 | A | 0   | 0.2143  | G |
| 25 | BICF2S23752214          | 35147882 | A | 0   | 0       | G |

|    |                         |          |   |     |        |   |
|----|-------------------------|----------|---|-----|--------|---|
| 25 | TIGRP2P328949_rs8890385 | 35156159 | G | 0   | 0      | A |
| 25 | BICF2P911034            | 35170429 | A | 0   | 0      | G |
| 25 | BICF2P568916            | 35182663 | 0 | 0   | 0      | A |
| 25 | BICF2G630100613         | 35190361 | C | 0   | 0.2143 | G |
| 25 | BICF2G630100635         | 35209516 | A | 0   | 0.2143 | C |
| 25 | BICF2G630100647         | 35222157 | A | 0   | 0      | C |
| 25 | BICF2P434476            | 35225825 | C | 0.5 | 0.5    | A |
| 25 | BICF2P865607            | 35243906 | A | 0   | 0      | G |
| 25 | BICF2S23325459          | 35259421 | A | 0   | 0      | G |
| 25 | TIGRP2P328978_rs8716745 | 35278759 | A | 0.5 | 0.1429 | G |
| 25 | BICF2P686163            | 35285793 | G | 0.5 | 0.1429 | A |
| 25 | TIGRP2P328986_rs8594972 | 35302028 | A | 0   | 0      | G |
| 25 | BICF2P1338380           | 35312968 | A | 1   | 0.4286 | G |
| 25 | BICF2S23534788          | 35318619 | G | 0   | 0      | A |
| 25 | BICF2P870780            | 35329419 | A | 0.5 | 0.2857 | G |
| 25 | TIGRP2P329015_rs9054978 | 35347625 | G | 0   | 0      | A |
| 25 | BICF2S2309919           | 35355082 | C | 0   | 0.3571 | A |
| 25 | BICF2G630100653         | 35362603 | 0 | 0   | 0      | A |
| 25 | BICF2P660437            | 35378726 | 0 | 0   | 0      | A |
| 25 | BICF2G630100669         | 35388957 | A | 0   | 0.3571 | C |
| 25 | BICF2P1161943           | 35403742 | A | 0.5 | 0.6429 | G |
| 25 | BICF2G630100703         | 35413170 | C | 0   | 0      | A |
| 25 | BICF2S23512429          | 35415163 | G | 0.5 | 0.1429 | C |
| 25 | BICF2G630100715         | 35420743 | A | 0   | 0.2143 | G |
| 25 | BICF2G630100738         | 35436329 | A | 0   | 0      | T |
| 25 | BICF2S23210643          | 35443506 | A | 1   | 0.7857 | G |
| 25 | BICF2G630100774         | 35457490 | A | 1   | 1      | G |
| 25 | BICF2G630100779         | 35462433 | C | 1   | 1      | A |
| 25 | BICF2G630100784         | 35467143 | G | 0.5 | 0.7143 | A |
| 25 | TIGRP2P329032_rs8966978 | 35482920 | 0 | 0   | 0      | G |
| 25 | BICF2P470040            | 35494081 | G | 1   | 1      | A |
| 25 | BICF2G630100804         | 35502371 | C | 1   | 1      | A |
| 25 | BICF2G630100811         | 35518703 | G | 0   | 0.2143 | A |
| 25 | BICF2P482077            | 35533692 | C | 0   | 0      | G |
| 25 | BICF2P445429            | 35541306 | A | 0   | 0      | C |
| 25 | BICF2P397538            | 35552538 | G | 1   | 0.7857 | A |
| 25 | BICF2G630100846         | 35558591 | T | 0.5 | 0.6429 | A |
| 25 | BICF2G630100870         | 35577230 | A | 0.5 | 0.3571 | G |
| 25 | BICF2G630100903         | 35585984 | A | 0.5 | 0.3571 | G |
| 25 | BICF2G630100931         | 35609749 | G | 0.5 | 0.7143 | A |
| 25 | BICF2P1286062           | 35628689 | C | 1   | 1      | A |
| 25 | BICF2P1101551           | 35645640 | 0 | 0   | 0      | A |
| 25 | BICF2G630100970         | 35654418 | A | 0   | 0.3571 | G |
| 25 | BICF2P1127880           | 35668862 | A | 0   | 0      | G |
| 25 | BICF2G630100998         | 35673365 | A | 0   | 0.3571 | G |
| 25 | BICF2S23124662          | 35695866 | A | 1   | 0.7857 | G |
| 25 | BICF2G630101029         | 35698927 | C | 1   | 0.7857 | A |

|    |                         |          |   |     |        |   |
|----|-------------------------|----------|---|-----|--------|---|
| 25 | BICF2G630101046         | 35709669 | G | 0   | 0.3571 | A |
| 25 | BICF2G630101065         | 35719510 | A | 1   | 1      | C |
| 25 | BICF2P370276            | 35734361 | C | 1   | 1      | A |
| 25 | BICF2G630101083         | 35740911 | G | 0   | 0.2143 | A |
| 25 | BICF2G630101091         | 35749416 | A | 0   | 0      | C |
| 25 | BICF2G630101108         | 35762935 | G | 0.5 | 0.1429 | C |
| 25 | BICF2G630101122         | 35770357 | A | 0   | 0      | G |
| 25 | TIGRP2P329094_rs9139064 | 35779811 | A | 0   | 0      | G |
| 25 | BICF2G630101146         | 35794460 | A | 0.5 | 0.2857 | C |
| 25 | BICF2P1501310           | 35806293 | A | 0   | 0.2143 | G |
| 25 | BICF2P736791            | 35814527 | G | 0   | 0.2143 | A |
| 25 | BICF2G630101149         | 35826192 | G | 0   | 0      | A |
| 25 | BICF2G630101153         | 35844633 | G | 0   | 0      | A |
| 25 | BICF2G630101159         | 35848156 | 0 | 0   | 0      | A |
| 25 | BICF2G630101191         | 35857531 | A | 0   | 0      | G |
| 25 | BICF2S23217623          | 35868990 | G | 0   | 0.3571 | A |
| 25 | BICF2G630101205         | 35889947 | 0 | 0   | 0      | A |
| 25 | BICF2G630101207         | 35902718 | A | 0   | 0      | G |
| 25 | TIGRP2P329136_rs8948274 | 35905579 | 0 | 0   | 0      | C |
| 25 | TIGRP2P329137_rs9201942 | 35915721 | G | 0.5 | 0.2857 | A |
| 25 | BICF2G630101214         | 35929812 | C | 1   | 1      | A |
| 25 | BICF2G630101238         | 35952729 | A | 0   | 0      | C |
| 25 | TIGRP2P329158_rs8640133 | 35963253 | A | 0   | 0      | G |
| 25 | BICF2G630101244         | 35963316 | A | 1   | 1      | G |
| 25 | BICF2G630101269         | 35980269 | A | 0.5 | 0.7143 | G |
| 25 | BICF2P231896            | 35981423 | G | 1   | 0.4286 | A |
| 25 | BICF2G630101272         | 35988723 | A | 0   | 0.5714 | G |
| 25 | BICF2G630101284         | 36002965 | G | 0.5 | 0.2857 | A |
| 25 | BICF2G630101305         | 36009020 | G | 0   | 0.2143 | A |
| 25 | BICF2G630101308         | 36025452 | A | 0.5 | 0.7143 | G |
| 25 | TIGRP2P329189_rs8888614 | 36027933 | G | 0   | 0      | C |
| 25 | BICF2P15864             | 36029756 | G | 0   | 0      | A |
| 25 | BICF2G630101310         | 36041083 | G | 0   | 0.2143 | A |
| 25 | BICF2G630101341         | 36062054 | G | 0   | 0.3333 | A |
| 25 | TIGRP2P329214_rs8878624 | 36068891 | A | 0   | 0      | G |
| 25 | BICF2P318890            | 36079804 | A | 0   | 0      | C |
| 25 | BICF2G630101376         | 36094865 | A | 0.5 | 0.2857 | C |
| 25 | BICF2P30214             | 36104825 | A | 0   | 0      | C |
| 25 | BICF2P888289            | 36120185 | 0 | 0   | 0      | A |
| 25 | BICF2S23639947          | 36131771 | C | 0.5 | 0.3571 | A |
| 25 | BICF2G630101391         | 36138125 | A | 0   | 0      | G |
| 25 | BICF2G630101413         | 36154697 | G | 0.5 | 0.1429 | A |
| 25 | BICF2G630101443         | 36171117 | G | 0   | 0      | A |
| 25 | BICF2P602231            | 36180272 | A | 0   | 0.2143 | C |
| 25 | BICF2G630101472         | 36201637 | G | 0.5 | 0.3571 | A |
| 25 | BICF2P45610             | 36211522 | 0 | 0   | 0      | G |
| 25 | BICF2P599432            | 36219815 | A | 0   | 0.3571 | G |

|    |                         |          |   |     |        |   |
|----|-------------------------|----------|---|-----|--------|---|
| 25 | BICF2G630101537         | 36244283 | C | 0   | 0.2143 | A |
| 25 | BICF2G630101540         | 36255491 | A | 1   | 0.7857 | G |
| 25 | BICF2G630101553         | 36269674 | A | 0.5 | 0.2857 | G |
| 25 | TIGRP2P329281_rs9062540 | 36272940 | A | 0   | 0      | G |
| 25 | BICF2G630101572         | 36286336 | 0 | 0   | 0      | G |
| 25 | BICF2G630101580         | 36304823 | A | 0   | 0      | C |
| 25 | BICF2S2365634           | 36306564 | A | 0   | 0      | G |
| 25 | BICF2P539461            | 36320452 | G | 1   | 1      | A |
| 25 | BICF2P942563            | 36337763 | G | 0.5 | 0.5    | A |
| 25 | BICF2G630101606         | 36341777 | A | 0   | 0      | G |
| 25 | BICF2G630101633         | 36357363 | G | 0.5 | 0.5    | A |
| 25 | BICF2P220228            | 36372174 | A | 0.5 | 0.5    | G |
| 25 | BICF2S23650359          | 36374560 | A | 0   | 0      | G |
| 25 | BICF2P1171048           | 36388720 | A | 0   | 0      | C |
| 25 | BICF2P1193638           | 36398832 | A | 0   | 0      | G |
| 25 | BICF2G630101662         | 36413019 | A | 0   | 0      | G |
| 25 | TIGRP2P329331_rs9154185 | 36425454 | A | 0   | 0      | G |
| 25 | BICF2P1195656           | 36432201 | A | 0   | 0      | G |
| 25 | BICF2S22928602          | 36449619 | A | 0   | 0      | G |
| 25 | BICF2G630101707         | 36450681 | T | 1   | 0.6429 | A |
| 25 | BICF2G630101710         | 36456252 | A | 0   | 0      | G |
| 25 | BICF2G630101733         | 36475777 | G | 0   | 0      | A |
| 25 | BICF2G630101744         | 36487177 | A | 1   | 0.7857 | G |
| 25 | BICF2G630101746         | 36490277 | A | 1   | 0.4286 | G |
| 25 | BICF2G630101781         | 36517135 | G | 1   | 0.4286 | A |
| 25 | BICF2G630101804         | 36531073 | A | 0.5 | 0.3571 | G |
| 25 | BICF2P1440387           | 36543830 | T | 0   | 0      | A |
| 25 | BICF2G630101816         | 36554553 | A | 0   | 0      | G |
| 25 | BICF2G630101831         | 36569329 | A | 0   | 0      | G |
| 25 | BICF2G630101844         | 36572840 | G | 0   | 0      | A |
| 25 | BICF2P306641            | 36600145 | G | 0   | 0.3571 | A |
| 25 | BICF2G630101859         | 36610730 | C | 0   | 0      | A |
| 25 | BICF2G630101865         | 36616482 | 0 | 0   | 0      | G |
| 25 | BICF2S23111606          | 36620084 | A | 0.5 | 0.3571 | G |
| 25 | BICF2G630101880         | 36634119 | A | 1   | 1      | G |
| 25 | BICF2P363521            | 36672337 | G | 0.5 | 0.2857 | A |
| 25 | BICF2G630101896         | 36684794 | A | 0.5 | 0.6429 | C |
| 25 | BICF2G630101906         | 36693556 | A | 0   | 0.2143 | G |
| 25 | BICF2G630101938         | 36709119 | C | 0.5 | 0.2857 | G |
| 25 | BICF2G630101947         | 36712701 | G | 0   | 0      | A |
| 25 | TIGRP2P329363_rs9067713 | 36730668 | A | 0.5 | 0.2857 | G |
| 25 | BICF2S22957085          | 36732285 | G | 0.5 | 0.3571 | A |
| 25 | BICF2G630101969         | 36743214 | A | 0.5 | 0.7143 | G |
| 25 | BICF2G630101972         | 36759774 | G | 0   | 0      | A |
| 25 | BICF2G630101991         | 36767486 | G | 0.5 | 0.6429 | A |
| 25 | BICF2P661272            | 36779413 | G | 0.5 | 0.3571 | C |
| 25 | BICF2G630102016         | 36779783 | 0 | 0   | 0      | G |



|    |                         |          |   |     |        |   |
|----|-------------------------|----------|---|-----|--------|---|
| 25 | BICF2G630102017         | 36780487 | C | 0.5 | 0.6429 | A |
| 25 | BICF2S23628706          | 36790481 | A | 0.5 | 0.3571 | C |
| 25 | BICF2S23523644          | 36803726 | G | 0   | 0      | A |
| 25 | BICF2P118962            | 36815528 | 0 | 0   | 0      | A |
| 25 | BICF2P911772            | 36830487 | 0 | 0   | 0      | G |
| 25 | BICF2G630102018         | 36862617 | A | 1   | 1      | G |
| 25 | BICF2G630102025         | 36869790 | G | 0   | 0      | A |
| 25 | BICF2G630102057         | 36881306 | A | 0   | 0      | G |
| 25 | BICF2G630102059         | 36903269 | G | 0.5 | 0.3571 | A |
| 25 | BICF2G630102064         | 36904602 | A | 0.5 | 0.3571 | G |
| 25 | BICF2G630102107         | 36923026 | G | 0   | 0      | A |
| 25 | BICF2P787632            | 36928247 | G | 0.5 | 0.6429 | A |
| 25 | BICF2G630102126         | 36932359 | A | 0.5 | 0.3571 | G |
| 25 | BICF2P1261378           | 36942150 | G | 0   | 0      | A |
| 25 | BICF2P574375            | 36958185 | G | 0.5 | 0.3571 | A |
| 25 | BICF2P277073            | 36966524 | A | 0.5 | 0.3571 | G |
| 25 | BICF2G630102146         | 36974263 | A | 1   | 0.6429 | G |
| 25 | BICF2G630102165         | 36992740 | G | 0.5 | 0.2857 | A |
| 25 | BICF2G630102185         | 37006309 | C | 0.5 | 0.2857 | A |
| 25 | BICF2S23341634          | 37013169 | A | 0   | 0      | G |
| 25 | BICF2G630102213         | 37021128 | C | 0   | 0      | A |
| 25 | BICF2G630102219         | 37030254 | G | 0.5 | 0.2857 | A |
| 25 | BICF2G630102228         | 37042778 | A | 0.5 | 0.2857 | G |
| 25 | BICF2P211209            | 37049135 | G | 0   | 0      | A |
| 25 | BICF2G630102241         | 37059490 | G | 0.5 | 0.2857 | A |
| 25 | BICF2G630102256         | 37070140 | T | 0.5 | 0.3571 | A |
| 25 | BICF2P535192            | 37079134 | A | 0.5 | 0.3571 | G |
| 25 | BICF2G630102287         | 37087870 | A | 0   | 0      | G |
| 25 | BICF2G630102303         | 37099773 | A | 0   | 0      | G |
| 25 | BICF2G630102332         | 37121314 | G | 0.5 | 0.3571 | A |
| 25 | BICF2G630102350         | 37122677 | A | 0.5 | 0.3571 | G |
| 25 | BICF2G630102368         | 37136865 | A | 0   | 0.3571 | C |
| 25 | BICF2G630102380         | 37141821 | A | 0   | 0      | G |
| 25 | BICF2G630102398         | 37150372 | G | 1   | 1      | A |
| 25 | BICF2G630102404         | 37159702 | A | 0   | 0      | T |
| 25 | BICF2P586603            | 37166851 | A | 0   | 0      | C |
| 25 | BICF2S24320072          | 37174611 | A | 0.5 | 0.6429 | C |
| 25 | BICF2G630102413         | 37182640 | A | 0   | 0      | G |
| 25 | BICF2G630102414         | 37193100 | A | 0   | 0      | G |
| 25 | TIGRP2P329497_rs9216494 | 37219060 | A | 0   | 0      | G |
| 25 | BICF2P769722            | 37227206 | A | 0   | 0      | G |
| 25 | BICF2P400426            | 37242346 | G | 0   | 0.3571 | A |
| 25 | TIGRP2P329508_rs9216929 | 37259474 | A | 1   | 1      | G |
| 25 | BICF2S23413966          | 37278827 | A | 1   | 1      | G |
| 25 | BICF2P451790            | 37283194 | C | 1   | 1      | A |
| 25 | BICF2P520022            | 37301366 | 0 | 0   | 0      | G |
| 25 | BICF2P772163            | 37309534 | G | 0   | 0      | A |

|    |                         |          |   |     |        |   |
|----|-------------------------|----------|---|-----|--------|---|
| 25 | BICF2S23731537          | 37318574 | A | 0   | 0      | G |
| 25 | BICF2S23742789          | 37329639 | G | 0   | 0      | A |
| 25 | TIGRP2P329548_rs9249947 | 37350850 | A | 0.5 | 0.3571 | G |
| 25 | BICF2P386432            | 37361499 | G | 0   | 0      | A |
| 25 | BICF2P1463299           | 37370845 | A | 0.5 | 0.6429 | G |
| 25 | BICF2P1196897           | 37376488 | A | 1   | 1      | G |
| 25 | BICF2P258415            | 37389771 | A | 0.5 | 0.6429 | T |
| 25 | BICF2S2442814           | 37400376 | G | 1   | 1      | A |
| 25 | BICF2P627059            | 37413420 | A | 0   | 0      | G |
| 25 | BICF2S23632434          | 37428693 | A | 0   | 0      | T |
| 25 | BICF2P462870            | 37435462 | G | 1   | 1      | A |
| 25 | TIGRP2P329582_rs8910874 | 37444290 | A | 1   | 1      | G |
| 25 | BICF2P1139157           | 37456030 | A | 1   | 1      | G |
| 25 | BICF2P250850            | 37468876 | C | 0   | 0      | A |
| 25 | TIGRP2P329593_rs8956401 | 37481496 | G | 1   | 0.7857 | A |
| 25 | TIGRP2P329603_rs8928409 | 37490332 | G | 1   | 0.7857 | C |
| 25 | TIGRP2P329607_rs9117628 | 37494467 | G | 1   | 0.7857 | A |
| 25 | BICF2P332625            | 37494562 | G | 1   | 0.7857 | A |
| 25 | BICF2P263013            | 37512670 | A | 0   | 0      | G |
| 25 | BICF2P1331362           | 37518449 | C | NA  | 1      | G |
| 25 | BICF2P13106             | 37524140 | A | 0.5 | 0.6429 | G |
| 25 | TIGRP2P329625_rs8874321 | 37526855 | A | 0   | 0      | G |
| 25 | BICF2P1419166           | 37541914 | G | 0.5 | 0.1429 | A |
| 25 | BICF2P644201            | 37554190 | A | 0.5 | 0.3571 | G |
| 25 | TIGRP2P329638_rs9127619 | 37567919 | G | 0.5 | 0.3571 | A |
| 25 | BICF2S2305535           | 37571102 | A | 0.5 | 0.1429 | G |
| 25 | BICF2P290681            | 37587589 | A | 0.5 | 0.6429 | G |
| 25 | BICF2P662793            | 37598032 | 0 | 0   | 0      | C |
| 25 | TIGRP2P329646_rs8540182 | 37615094 | A | 0.5 | 0.6429 | G |
| 25 | TIGRP2P329649_rs8686560 | 37637528 | A | NA  | 0.6667 | G |
| 25 | TIGRP2P329650_rs8722133 | 37644527 | A | 0   | 0      | G |
| 25 | BICF2S2327293           | 37656377 | A | 0   | 0      | G |
| 25 | TIGRP2P329651_rs9043346 | 37665018 | A | NA  | NA     | G |
| 25 | BICF2P833918            | 37679928 | G | 0   | 0.2143 | A |
| 25 | BICF2P199939            | 37695437 | A | 1   | 0.7857 | G |
| 25 | BICF2S23534472          | 37707121 | A | 0   | 0      | T |
| 25 | BICF2P912772            | 37717934 | G | 1   | 1      | A |
| 25 | TIGRP2P329670_rs8819579 | 37724464 | A | 0   | 0      | G |
| 25 | BICF2P1278438           | 37732701 | 0 | 0   | 0      | T |
| 25 | TIGRP2P329677_rs8638871 | 37747323 | A | 1   | 1      | G |
| 25 | BICF2P959038            | 37765076 | G | 1   | 1      | A |
| 25 | BICF2P38622             | 37775850 | C | 1   | 1      | G |
| 25 | BICF2S23038391          | 37780578 | A | 1   | 1      | G |
| 25 | BICF2P889737            | 37800128 | G | 1   | 1      | A |
| 25 | BICF2S23424585          | 37808907 | G | 1   | 1      | A |
| 25 | BICF2P63013             | 37818161 | G | 1   | 1      | A |
| 25 | BICF2P1178109           | 37823519 | A | 1   | 1      | G |

|    |                         |          |   |     |         |   |
|----|-------------------------|----------|---|-----|---------|---|
| 25 | TIGRP2P329713_rs8641405 | 37844425 | C | 0.5 | 0.6429  | A |
| 25 | BICF2S23651866          | 37854327 | 0 | 0   | 0       | C |
| 25 | BICF2P689445            | 37863726 | A | 0   | 0.5714  | C |
| 25 | BICF2P159291            | 37873299 | G | 0   | 0.5714  | A |
| 25 | TIGRP2P329722_rs9179539 | 37873536 | C | 0   | 0.2143  | G |
| 25 | TIGRP2P329728_rs9159236 | 37887060 | 0 | 0   | 0       | A |
| 25 | BICF2P750808            | 37903908 | G | 0.5 | 0.7143  | A |
| 25 | BICF2P463886            | 37907411 | A | 0.5 | 1       | G |
| 25 | BICF2P1175539           | 37929979 | A | 0.5 | 0.1429  | G |
| 25 | BICF2P1020448           | 37939656 | G | 0.5 | 0.7143  | A |
| 25 | BICF2S23518972          | 37952992 | G | 0.5 | 0.7143  | A |
| 25 | BICF2S23354617          | 37971662 | A | 0   | 0.5714  | G |
| 25 | BICF2S2294469           | 37973927 | 0 | 0   | 0       | G |
| 25 | BICF2P409679            | 38000879 | C | 0.5 | 0.1429  | G |
| 25 | BICF2P911370            | 38011844 | A | 0.5 | 0.08333 | G |
| 25 | BICF2P1312212           | 38020254 | 0 | 0   | 0       | A |
| 25 | BICF2P1288835           | 38034890 | A | 0.5 | 0.7143  | G |
| 25 | BICF2P1345586           | 38039541 | A | 1   | 1       | G |
| 25 | BICF2P1117663           | 38051815 | 0 | 0   | 0       | G |
| 25 | BICF2P886119            | 38064552 | A | 0.5 | 0.6429  | G |
| 25 | BICF2S22939016          | 38073264 | A | 0   | 0       | G |
| 25 | BICF2S22911649          | 38080993 | A | 1   | 0.6429  | G |
| 25 | TIGRP2P329762_rs9093138 | 38096890 | C | 1   | 0.6667  | A |
| 25 | BICF2P389679            | 38102430 | A | 0   | 0.3333  | G |
| 25 | BICF2G630102419         | 38114949 | A | 0   | 0.3333  | G |
| 25 | BICF2G630102431         | 38123233 | G | 0   | 0.3571  | A |
| 25 | BICF2G630102443         | 38137483 | G | 0.5 | 0.5     | A |
| 25 | BICF2S2337873           | 38139032 | A | 0   | 0       | G |
| 25 | BICF2S236425            | 38146811 | 0 | 0   | 0       | A |
| 25 | BICF2G630102455         | 38164898 | G | 0   | 0       | A |
| 25 | BICF2G630102457         | 38179673 | G | 0   | 0.5714  | A |
| 25 | BICF2G630102459         | 38180853 | T | 0   | 0.2143  | A |
| 25 | BICF2G630102475         | 38222967 | A | 1   | 0.7857  | G |
| 25 | BICF2G630102479         | 38227584 | A | 0.5 | 0.6429  | G |
| 25 | BICF2P459281            | 38240356 | A | 0.5 | 0.6429  | G |
| 25 | BICF2G630102489         | 38250465 | A | 0.5 | 0.6429  | C |
| 25 | BICF2G630102500         | 38265365 | G | 1   | 0.7857  | A |
| 25 | BICF2G630102517         | 38280181 | A | 1   | 0.7857  | G |
| 25 | BICF2G630102523         | 38283810 | A | 1   | 0.7857  | G |
| 25 | BICF2G630102532         | 38288625 | A | 1   | 0.7857  | G |
| 25 | BICF2G630102541         | 38297338 | A | 0   | 0       | G |
| 25 | BICF2G630102555         | 38311485 | C | 0   | 0       | A |
| 25 | TIGRP2P329801_rs9039735 | 38320951 | A | 0   | 0       | G |
| 25 | BICF2P112905            | 38337116 | A | 0   | 0       | G |
| 25 | BICF2S23525507          | 38350967 | G | 0   | 0.2143  | A |
| 25 | BICF2G630102576         | 38369793 | A | 1   | 0.7857  | G |
| 25 | BICF2G630102598         | 38384313 | G | 1   | 0.7857  | A |

|    |                         |          |   |     |        |   |
|----|-------------------------|----------|---|-----|--------|---|
| 25 | TIGRP2P329806_rs8949291 | 38390718 | G | 1   | 0.7857 | A |
| 25 | BICF2G630102611         | 38399476 | G | 1   | 0.7857 | A |
| 25 | BICF2P27714             | 38418020 | 0 | 0   | 0      | C |
| 25 | BICF2G630102629         | 38428006 | A | 0.5 | 0.2857 | C |
| 25 | BICF2G630102632         | 38429894 | A | 0.5 | 0.2857 | G |
| 25 | BICF2G630102634         | 38436176 | G | 0   | 0.2143 | A |
| 25 | BICF2G630102651         | 38444726 | C | 0.5 | 0.2857 | G |
| 25 | BICF2G630102653         | 38457495 | G | 0.5 | 0.8571 | A |
| 25 | BICF2G630102672         | 38474112 | C | 0.5 | 0.8571 | A |
| 25 | BICF2G630102683         | 38484601 | A | 0.5 | 0.6429 | G |
| 25 | BICF2G630102691         | 38492384 | A | 0.5 | 0.3571 | G |
| 25 | BICF2G630102703         | 38507450 | C | 0   | 0      | G |
| 25 | BICF2P1388438           | 38515189 | G | 0.5 | 0.2857 | A |
| 25 | BICF2G630102705         | 38525189 | A | 0.5 | 0.3571 | G |
| 25 | BICF2G630102715         | 38533585 | G | 0.5 | 0.2857 | A |
| 25 | BICF2G630102730         | 38545915 | A | 0.5 | 0.25   | G |
| 25 | BICF2P1393857           | 38559149 | A | NA  | 0.25   | G |
| 25 | BICF2S22923964          | 38565111 | A | 0   | 0      | G |
| 25 | BICF2P978320            | 38571417 | A | 0   | 0      | G |
| 25 | BICF2P412669            | 38591744 | 0 | 0   | 0      | A |
| 25 | BICF2G630102755         | 38599762 | G | 0   | 0      | A |
| 25 | BICF2G630102765         | 38608661 | A | 0   | 0      | G |
| 25 | BICF2G630102768         | 38627044 | G | 1   | 1      | A |
| 25 | BICF2G630102774         | 38629709 | G | 0   | 0      | A |
| 25 | BICF2P825970            | 38643139 | C | 1   | 1      | A |
| 25 | TIGRP2P329864_rs9084556 | 38654074 | C | 0   | 0      | A |
| 25 | BICF2S23658596          | 38669613 | A | 0.5 | 0.6429 | G |
| 25 | BICF2G630102811         | 38677171 | A | 0   | 0      | G |
| 25 | BICF2S23337639          | 38686378 | C | 0   | 0      | A |
| 25 | BICF2S23331482          | 38696677 | G | 0.5 | 0.6429 | A |
| 25 | BICF2G630102825         | 38701838 | G | 0   | 0      | A |
| 25 | TIGRP2P329884_rs9255114 | 38712376 | 0 | 0   | 0      | G |
| 25 | BICF2G630102829         | 38715080 | A | 1   | 1      | G |
| 25 | BICF2G630102854         | 38726489 | A | 0.5 | 0.3571 | G |
| 25 | BICF2G630102866         | 38733402 | G | 0   | 0      | A |
| 25 | BICF2G630102894         | 38744680 | G | 0   | 0      | A |
| 25 | BICF2P1395572           | 38762625 | A | 0   | 0      | G |
| 25 | BICF2G630102896         | 38768801 | A | 0   | 0      | G |
| 25 | BICF2G630102902         | 38787951 | A | 0.5 | 0.6429 | G |
| 25 | BICF2G630102918         | 38795380 | A | 0.5 | 0.6429 | G |
| 25 | TIGRP2P329898_rs9039101 | 38807572 | G | 1   | 1      | A |
| 25 | BICF2P1123542           | 38811116 | A | 0.5 | 0.6429 | T |
| 25 | BICF2P1060544           | 38821831 | G | 1   | 1      | A |
| 25 | BICF2P1389326           | 38828463 | A | 0.5 | 0.6429 | G |
| 25 | TIGRP2P329919_rs8590143 | 38841538 | A | 0   | 0      | G |
| 25 | BICF2S22958488          | 38849492 | C | 0   | 0      | A |
| 25 | TIGRP2P329927_rs8868963 | 38865789 | 0 | 0   | 0      | A |

|    |                         |          |   |     |        |   |
|----|-------------------------|----------|---|-----|--------|---|
| 25 | BICF2P1297375           | 38875866 | A | 0   | 0      | G |
| 25 | BICF2P608311            | 38881797 | C | 0   | 0      | G |
| 25 | BICF2P1428159           | 38911551 | A | 0   | 0      | G |
| 25 | BICF2S23442977          | 38921051 | G | 0.5 | 0.6429 | A |
| 25 | BICF2G630102937         | 38930907 | A | 0.5 | 0.6429 | G |
| 25 | BICF2G630102977         | 38940151 | A | 0.5 | 0.3571 | G |
| 25 | BICF2P501247            | 38952227 | A | 0.5 | 0.6429 | G |
| 25 | TIGRP2P329949_rs8621198 | 38971038 | G | 1   | 1      | A |
| 25 | BICF2S23235190          | 38978005 | A | 0   | 0      | C |
| 25 | BICF2G630103026         | 38979040 | G | 0   | 0      | A |
| 25 | BICF2G630103060         | 38989747 | A | 0.5 | 0.6429 | G |
| 25 | BICF2P624159            | 39005280 | A | 0   | 0      | G |
| 25 | BICF2P551561            | 39008688 | A | 0   | 0      | G |
| 25 | BICF2P1078459           | 39032404 | A | 0   | 0      | G |
| 25 | BICF2P531478            | 39049122 | A | 0   | 0      | G |
| 25 | BICF2P1293832           | 39055556 | A | 0   | 0      | G |
| 25 | BICF2P482097            | 39068063 | C | 0.5 | 0.6429 | A |
| 25 | BICF2P323423            | 39084771 | G | 0.5 | 0.6429 | A |
| 25 | BICF2S23137608          | 39094501 | A | 0   | 0      | G |
| 25 | BICF2G630103089         | 39100604 | A | 0.5 | 0.6429 | G |
| 25 | BICF2G630103111         | 39111753 | A | 0.5 | 0.6429 | G |
| 25 | BICF2G630103151         | 39132513 | A | 1   | 1      | G |
| 25 | BICF2G630103169         | 39145523 | C | 1   | 1      | G |
| 25 | BICF2G630103183         | 39153020 | A | 0.5 | 0.6429 | C |
| 25 | BICF2G630103191         | 39157625 | A | 0.5 | 0.6429 | G |
| 25 | BICF2P543963            | 39169024 | A | 0   | 0      | C |
| 25 | BICF2G630103220         | 39186883 | C | 0.5 | 0.6429 | A |
| 25 | BICF2G630103242         | 39193096 | A | 0   | 0      | G |
| 25 | BICF2G630103256         | 39198507 | A | 0   | 0      | G |
| 25 | BICF2S23510677          | 39210185 | A | 0.5 | 0.6429 | G |
| 25 | BICF2P154937            | 39216579 | A | 0.5 | 0.3571 | C |
| 25 | BICF2G630103272         | 39227972 | G | 0   | 0      | A |
| 25 | BICF2G630103296         | 39238308 | G | 0   | 0      | A |
| 25 | BICF2G630103313         | 39254947 | A | 0   | 0      | G |
| 25 | BICF2G630103316         | 39263609 | A | 0   | 0      | G |
| 25 | BICF2P622699            | 39266369 | A | 0   | 0      | G |
| 25 | BICF2G630103317         | 39267891 | G | 0   | 0      | A |
| 25 | TIGRP2P329990_rs9093100 | 39281230 | G | 1   | 1      | A |
| 25 | BICF2S23356716          | 39282464 | G | 0   | 0      | A |
| 25 | BICF2G630103322         | 39285558 | 0 | 0   | 0      | A |
| 25 | TIGRP2P330007_rs9000358 | 39296421 | G | 0.5 | 0.6429 | A |
| 25 | TIGRP2P330009_rs8682628 | 39313795 | G | 0.5 | 0.3571 | A |
| 25 | BICF2G630103357         | 39331109 | G | 0   | 0      | A |
| 25 | BICF2P854154            | 39350315 | C | 0   | 0      | A |
| 25 | BICF2P527441            | 39354085 | 0 | 0   | 0      | G |
| 25 | BICF2P766974            | 39369436 | A | 0   | 0      | T |
| 25 | BICF2S23655742          | 39373381 | A | 0   | 0      | C |

|    |                         |          |   |     |        |   |
|----|-------------------------|----------|---|-----|--------|---|
| 25 | BICF2P1140804           | 39377234 | 0 | 0   | 0      | G |
| 25 | BICF2S23434393          | 39387930 | G | 1   | 1      | A |
| 25 | BICF2P1103473           | 39402918 | 0 | 0   | 0      | A |
| 25 | BICF2S23237047          | 39411827 | C | 0   | 0      | A |
| 25 | BICF2S23155569          | 39426329 | 0 | 0   | 0      | G |
| 25 | BICF2P428189            | 39456523 | A | 1   | 1      | G |
| 25 | BICF2P601488            | 39466982 | G | 0.5 | 0.3571 | A |
| 25 | BICF2P585267            | 39469329 | C | 0   | 0      | A |
| 25 | BICF2S23352689          | 39481574 | A | 0   | 0      | G |
| 25 | BICF2S2337532           | 39512800 | A | 0   | 0      | C |
| 25 | BICF2P287735            | 39524328 | G | 0.5 | 0.3571 | A |
| 25 | BICF2P1062311           | 39531891 | G | 0.5 | 0.6429 | A |
| 25 | TIGRP2P330034_rs8753830 | 39534405 | A | 0.5 | 0.6429 | G |
| 25 | BICF2P607815            | 39546034 | A | 0.5 | 0.6429 | T |
| 25 | BICF2P132962            | 39556478 | G | 1   | 1      | A |
| 25 | BICF2S2338837           | 39570884 | G | 0.5 | 0.3571 | A |
| 25 | BICF2S23125067          | 39597230 | A | 0   | 0      | G |
| 25 | BICF2P521561            | 39608924 | G | 0.5 | 0.6429 | A |
| 25 | BICF2S2313765           | 39621261 | G | 0.5 | 0.6429 | A |
| 25 | BICF2G630103359         | 39631698 | 0 | 0   | 0      | G |
| 25 | BICF2P578850            | 39672251 | G | 0   | 0      | A |
| 25 | BICF2P1456451           | 39676366 | A | 0   | 0      | G |
| 25 | TIGRP2P330072_rs8791007 | 39693210 | C | 1   | 1      | G |
| 25 | BICF2P381941            | 39696307 | A | 0.5 | 0.6429 | G |
| 25 | BICF2P1390118           | 39701887 | G | 1   | 1      | A |
| 25 | BICF2P399525            | 39715478 | 0 | 0   | 0      | G |
| 25 | BICF2P406685            | 39728531 | A | 0   | 0      | C |
| 25 | BICF2P1318714           | 39735757 | A | 0   | 0      | T |
| 25 | BICF2P1458262           | 39750993 | A | 0.5 | 0.7143 | G |
| 25 | BICF2P1383780           | 39760940 | C | 0.5 | 0.2857 | A |
| 25 | BICF2P1315460           | 39767257 | G | 0.5 | 0.7143 | A |
| 25 | BICF2P774145            | 39772149 | A | 0   | 0      | G |
| 25 | BICF2P1416352           | 39784949 | 0 | 0   | 0      | G |
| 25 | TIGRP2P330099_rs8691656 | 39791235 | 0 | 0   | 0      | A |
| 25 | BICF2S23654763          | 39811299 | A | 1   | 1      | G |
| 25 | BICF2P409841            | 39819616 | 0 | 0   | 0      | G |
| 25 | BICF2P1013325           | 39834540 | 0 | 0   | 0      | C |
| 25 | BICF2S23236847          | 39838845 | G | 0   | 0      | A |
| 25 | BICF2P809487            | 39865629 | 0 | 0   | 0      | A |
| 25 | BICF2S22922820          | 39877701 | C | 0.5 | 0.2857 | G |
| 25 | BICF2P741195            | 39883213 | A | 0.5 | 0.2857 | G |
| 25 | BICF2P427928            | 39895719 | 0 | 0   | 0      | A |
| 25 | BICF2P1097921           | 39916051 | 0 | 0   | 0      | G |
| 25 | TIGRP2P330138_rs9026657 | 39917747 | A | 0.5 | 0.7143 | G |
| 25 | BICF2P1496035           | 39931281 | G | 0.5 | 0.7143 | A |
| 25 | BICF2P848670            | 39939615 | A | 0   | 0      | G |
| 25 | BICF2P123866            | 39952905 | C | 0   | 0      | A |

|    |                         |          |   |     |        |   |
|----|-------------------------|----------|---|-----|--------|---|
| 25 | BICF2S23259173          | 39963786 | G | 1   | 1      | A |
| 25 | BICF2P374603            | 39982094 | A | 0   | 0      | G |
| 25 | BICF2P1405227           | 40005325 | G | 0.5 | 0.2857 | A |
| 25 | BICF2P572421            | 40018576 | G | 1   | 1      | A |
| 25 | BICF2P778837            | 40024016 | G | 1   | 1      | A |
| 25 | BICF2P325610            | 40039956 | A | 0   | 0      | G |
| 25 | TIGRP2P330196_rs8996086 | 40050764 | A | 1   | 1      | G |
| 25 | BICF2P805229            | 40054538 | 0 | 0   | 0      | A |
| 25 | BICF2P1373331           | 40066647 | A | 0.5 | 0.7143 | G |
| 25 | BICF2P868939            | 40081252 | A | 1   | 1      | G |
| 25 | BICF2S23610148          | 40089193 | 0 | 0   | 0      | A |
| 25 | BICF2P1279311           | 40104021 | A | 0.5 | 0.2857 | G |
| 25 | G1292f3S18              | 40153646 | C | 0.5 | 0.2857 | A |
| 25 | BICF2P263284            | 40159602 | G | 0   | 0      | C |
| 25 | BICF2P813396            | 40185522 | G | 0.5 | 0.7143 | A |
| 25 | BICF2P209696            | 40194527 | A | 0.5 | 0.7143 | G |
| 25 | BICF2P32177             | 40199658 | G | 0   | 0      | A |
| 25 | BICF2P1136630           | 40208625 | C | 0.5 | 0.7143 | A |
| 25 | BICF2S23037414          | 40226286 | 0 | 0   | 0      | G |
| 25 | BICF2P592527            | 40235338 | A | 0   | 0      | G |
| 25 | BICF2P289831            | 40238788 | A | 0.5 | 0.2857 | T |
| 25 | BICF2P975526            | 40254834 | A | 0.5 | 0.2857 | C |
| 25 | BICF2S23433282          | 40269476 | A | 0.5 | 0.2857 | G |
| 25 | TIGRP2P330267_rs8925958 | 40279922 | 0 | 0   | 0      | C |
| 25 | BICF2P1411564           | 40288845 | A | 0.5 | 0.2857 | C |
| 25 | BICF2S23041172          | 40302572 | C | 0.5 | 0.7143 | A |
| 25 | BICF2P355237            | 40315143 | G | 0   | 0      | C |
| 25 | BICF2P245834            | 40329920 | G | 0.5 | 0.7143 | A |
| 25 | BICF2S23150051          | 40346832 | A | 0   | 0      | G |
| 25 | BICF2P1196341           | 40353872 | G | 0   | 0      | A |
| 25 | BICF2P875925            | 40367601 | A | 0   | 0      | T |
| 25 | BICF2P461339            | 40378613 | G | 0.5 | 0.7143 | A |
| 25 | BICF2P227993            | 40397669 | 0 | 0   | 0      | G |
| 25 | BICF2P1353881           | 40402480 | 0 | 0   | 0      | A |
| 25 | BICF2P529301            | 40411149 | G | 0   | 0      | A |
| 25 | BICF2P999174            | 40424827 | A | 0   | 0      | G |
| 25 | BICF2P81865             | 40443209 | G | 0.5 | 0.7143 | A |
| 25 | BICF2P1443008           | 40448382 | G | 0.5 | 0.7143 | A |
| 25 | BICF2P1201324           | 40457086 | G | 0.5 | 0.7143 | A |
| 25 | BICF2S23020296          | 40472659 | G | 0   | 0      | A |
| 25 | BICF2P935642            | 40481305 | G | 0.5 | 0.7143 | A |
| 25 | BICF2P471722            | 40496988 | A | 0   | 0      | G |
| 25 | BICF2P302245            | 40512965 | A | 0.5 | 0.7143 | G |
| 25 | BICF2P1047799           | 40517217 | G | 0   | 0      | A |
| 25 | BICF2P1349538           | 40534004 | A | 0.5 | 0.2857 | G |
| 25 | BICF2P131200            | 40538998 | A | 0   | 0      | G |
| 25 | BICF2P372336            | 40551055 | G | 0   | 0      | A |

|    |                         |          |   |     |        |   |
|----|-------------------------|----------|---|-----|--------|---|
| 25 | BICF2P1346333           | 40563792 | G | 1   | 1      | A |
| 25 | TIGRP2P330308_rs8580372 | 40563946 | C | 0   | 0      | G |
| 25 | BICF2P1181787           | 40574947 | A | 0.5 | 0.7857 | G |
| 25 | BICF2P1181786           | 40575022 | A | 0.5 | 0.2143 | G |
| 25 | BICF2P1208120           | 40604655 | A | 0   | 0      | G |
| 25 | BICF2S2332015           | 40618090 | A | 0   | 0      | G |
| 25 | BICF2S2297074           | 40636977 | A | 0.5 | 0.2143 | G |
| 25 | TIGRP2P330341_rs9098648 | 40643104 | G | 0.5 | 0.7857 | A |
| 25 | TIGRP2P330346_rs8736388 | 40659386 | A | 1   | 1      | G |
| 25 | BICF2S22918529          | 40674108 | G | 1   | 1      | A |
| 25 | BICF2S2298000           | 40678168 | A | 0   | 0      | G |
| 25 | TIGRP2P330354_rs8952230 | 40687122 | A | 0   | 0      | C |
| 25 | TIGRP2P330365_rs8600168 | 40712225 | A | 0.5 | 0.7857 | G |
| 25 | BICF2P612669            | 40739099 | A | 0.5 | 0.7857 | G |
| 25 | BICF2S23045672          | 40749502 | C | 0   | 0      | A |
| 25 | BICF2P1158901           | 40759101 | C | 0   | 0      | A |
| 25 | BICF2P977016            | 40767724 | G | 0   | 0      | A |
| 25 | BICF2P27591             | 40782935 | A | 0   | 0      | G |
| 25 | BICF2S23038639          | 40808780 | A | 0   | 0      | G |
| 25 | BICF2P1332024           | 40819642 | 0 | 0   | 0      | G |
| 25 | BICF2S23051218          | 40845300 | A | 0   | 0      | C |
| 25 | BICF2S2458604           | 40882092 | A | 0   | 0      | G |
| 25 | BICF2P427634            | 40887406 | 0 | 0   | 0      | A |
| 25 | BICF2S23516711          | 40899116 | G | 0   | 0      | A |
| 25 | BICF2P663808            | 40912144 | C | 0   | 0      | G |
| 25 | BICF2P830253            | 40917556 | A | 0.5 | 0.2143 | G |
| 25 | BICF2P609574            | 40928649 | 0 | 0   | 0      | G |
| 25 | BICF2P1192892           | 40948807 | G | 0   | 0      | A |
| 25 | BICF2P54251             | 40956931 | G | 0   | 0      | A |
| 25 | BICF2P124829            | 40963941 | A | 0   | 0      | G |
| 25 | BICF2P815865            | 40989041 | A | 0   | 0      | G |
| 25 | BICF2P737154            | 40994644 | A | 0   | 0      | G |
| 25 | TIGRP2P330401_rs9227429 | 41003575 | G | 0   | 0      | A |
| 25 | BICF2S23554061          | 41017886 | G | 0   | 0      | A |
| 25 | BICF2P839035            | 41030415 | A | 0   | 0      | G |
| 25 | BICF2P839046            | 41032361 | G | 0   | 0      | A |
| 25 | BICF2P345921            | 41044632 | A | 0.5 | 0.8333 | C |
| 25 | BICF2P581453            | 41061834 | A | 0   | 0      | T |
| 25 | BICF2S23050210          | 41074763 | A | 0   | 0      | G |
| 25 | TIGRP2P330432_rs8487688 | 41084677 | G | 1   | 1      | A |
| 25 | BICF2P507504            | 41093673 | C | 0   | 0      | A |
| 25 | BICF2P908130            | 41109080 | G | 0   | 0      | A |
| 25 | BICF2P343047            | 41117559 | G | 0   | 0      | A |
| 25 | BICF2P1269033           | 41128511 | A | 0   | 0      | T |
| 25 | TIGRP2P330473_rs8609917 | 41136512 | G | 0   | 0      | A |
| 25 | BICF2P436780            | 41146946 | 0 | 0   | 0      | T |
| 25 | TIGRP2P330476_rs9073486 | 41153240 | A | 0.5 | 0.7857 | G |



|    |                         |          |   |     |        |   |
|----|-------------------------|----------|---|-----|--------|---|
| 25 | BICF2P435682            | 41155381 | G | 0.5 | 0.7857 | A |
| 25 | TIGRP2P330482_rs8833579 | 41157006 | G | 0.5 | 0.7857 | A |
| 25 | TIGRP2P330484_rs8816955 | 41161138 | A | 0.5 | 0.7857 | G |
| 25 | TIGRP2P330494_rs9045703 | 41171164 | 0 | 0   | 0      | A |
| 25 | BICF2S23712118          | 41184564 | A | 0   | 0      | G |
| 25 | BICF2S23723915          | 41196680 | A | 0.5 | 0.7857 | G |
| 25 | TIGRP2P330518_rs8634332 | 41204936 | G | 0   | 0      | A |
| 25 | BICF2P1201530           | 41216472 | A | 0   | 0      | G |
| 25 | BICF2S23661063          | 41233127 | G | 0.5 | 0.2143 | A |
| 25 | BICF2P1087940           | 41241213 | A | 0   | 0      | G |
| 25 | BICF2P742049            | 41255763 | 0 | 0   | 0      | A |
| 25 | BICF2P1120991           | 41265136 | 0 | 0   | 0      | G |
| 25 | BICF2P630072            | 41277437 | 0 | 0   | 0      | G |
| 25 | BICF2S2454521           | 41285013 | G | 0   | 0      | A |
| 25 | BICF2P362904            | 41297994 | 0 | 0   | 0      | A |
| 25 | BICF2P334862            | 41333850 | A | 0   | 0      | G |
| 25 | BICF2P1444519           | 41342948 | A | 0   | 0      | G |
| 25 | BICF2P1187230           | 41354504 | A | 0   | 0      | C |
| 25 | BICF2P712612            | 41368191 | G | 0.5 | 0.2143 | A |
| 25 | BICF2S23035343          | 41381138 | C | 0   | 0      | A |
| 25 | BICF2P319648            | 41388736 | G | 0   | 0      | A |
| 25 | BICF2P591924            | 41408334 | G | 0   | 0      | A |
| 25 | BICF2P961042            | 41422765 | A | 0   | 0      | G |
| 25 | BICF2P961044            | 41424171 | A | 0   | 0      | G |
| 25 | BICF2P695146            | 41442828 | T | 0.5 | 0.2143 | A |
| 25 | BICF2P1168344           | 41445859 | A | 0   | 0      | G |
| 25 | BICF2P994548            | 41449921 | C | 0.5 | 0.2143 | A |
| 25 | TIGRP2P330581_rs8917837 | 41464551 | C | 0.5 | 0.2143 | A |
| 25 | BICF2P1004045           | 41473674 | G | 0.5 | 0.2143 | A |
| 25 | BICF2P216679            | 41487126 | G | 0   | 0      | A |
| 25 | BICF2S23311180          | 41502872 | T | 0.5 | 0.2143 | A |
| 25 | TIGRP2P330594_rs8955556 | 41513132 | A | 0.5 | 0.2143 | G |
| 25 | BICF2P641416            | 41514680 | C | 0.5 | 0.2143 | A |
| 25 | BICF2P686026            | 41522432 | G | 0.5 | 0.2143 | A |
| 25 | BICF2P1297146           | 41529974 | A | 0.5 | 0.7857 | G |
| 25 | BICF2S23331999          | 41540749 | A | 0.5 | 0.7857 | G |
| 25 | BICF2S23023205          | 41552365 | C | 0.5 | 0.7857 | A |
| 25 | BICF2P282795            | 41566112 | 0 | 0   | 0      | A |
| 25 | BICF2P274583            | 41573439 | 0 | 0   | 0      | G |
| 25 | BICF2P609947            | 41585809 | A | 0   | 0      | G |
| 25 | BICF2S23438782          | 41597195 | T | 0.5 | 0.2143 | A |
| 25 | BICF2P842087            | 41617172 | A | 1   | 0.3571 | G |
| 25 | BICF2P228137            | 41621649 | A | 1   | 0.3571 | G |
| 25 | BICF2P250501            | 41634717 | A | 0   | 0      | G |
| 25 | BICF2P496673            | 41647774 | A | 0   | 0      | G |
| 25 | BICF2S23434084          | 41659491 | A | 0   | 0      | G |
| 25 | TIGRP2P330674_rs9032068 | 41671830 | A | 0   | 0.6429 | G |

|    |                         |          |   |   |        |   |
|----|-------------------------|----------|---|---|--------|---|
| 25 | BICF2S23314170          | 41678185 | G | 0 | 0      | A |
| 25 | BICF2S23143721          | 41690900 | A | 1 | 0.3571 | C |
| 25 | BICF2S23148580          | 41700279 | A | 0 | 0.6667 | G |
| 25 | BICF2P537011            | 41716639 | A | 0 | 0.6429 | G |
| 25 | BICF2S23239525          | 41721100 | 0 | 0 | 0      | G |
| 25 | TIGRP2P330683_rs8958652 | 41731883 | G | 0 | 0.6429 | A |
| 25 | BICF2P765771            | 41739461 | A | 0 | 0      | C |
| 25 | BICF2S23232897          | 41773341 | G | 0 | 0      | A |
| 25 | BICF2P366994            | 41790181 | A | 1 | 0.3571 | G |
| 25 | BICF2P1130452           | 41804380 | 0 | 0 | 0      | G |
| 25 | BICF2P651750            | 41816552 | A | 0 | 0.6429 | C |
| 25 | TIGRP2P330724_rs9131933 | 41831754 | A | 1 | 0.3571 | G |
| 25 | BICF2P1264687           | 41841884 | A | 1 | 0.3571 | G |
| 25 | BICF2P1341041           | 41848979 | G | 0 | 0      | A |
| 25 | BICF2P28442             | 41867376 | C | 0 | 0      | G |
| 25 | BICF2P172485            | 41880969 | A | 0 | 0      | G |
| 25 | BICF2P1055085           | 41887180 | A | 1 | 0.3571 | G |
| 25 | TIGRP2P330761_rs9003702 | 41897360 | A | 1 | NA     | G |
| 25 | BICF2S22918682          | 41906302 | A | 0 | 0      | C |
| 25 | BICF2P547864            | 41916804 | G | 0 | 0      | A |
| 25 | BICF2S23056681          | 41927215 | 0 | 0 | 0      | C |
| 25 | BICF2P299918            | 41933972 | G | 0 | 0      | A |
| 25 | BICF2S23652313          | 41941238 | 0 | 0 | 0      | G |
| 25 | BICF2S23510191          | 41959177 | G | 1 | 0.2857 | A |
| 25 | BICF2P300211            | 41969489 | 0 | 0 | 0      | A |
| 25 | BICF2P234268            | 41983572 | A | 0 | 0      | G |
| 25 | BICF2S2442003           | 41996870 | A | 0 | 0      | T |
| 25 | BICF2P118174            | 42008339 | A | 1 | 1      | G |
| 25 | TIGRP2P330803_rs9067895 | 42011224 | A | 0 | 0      | G |
| 25 | TIGRP2P330807_rs9063274 | 42030677 | 0 | 0 | 0      | A |
| 25 | BICF2P847846            | 42034701 | G | 0 | 0      | C |
| 25 | BICF2P651182            | 42050900 | A | 0 | 0.7143 | G |
| 25 | TIGRP2P330811_rs8863538 | 42057304 | C | 0 | 0      | A |
| 25 | BICF2P338728            | 42073251 | A | 0 | 0      | G |
| 25 | BICF2P686142            | 42081374 | G | 0 | 0      | A |
| 25 | BICF2P417796            | 42112520 | A | 0 | 0      | G |
| 25 | BICF2S24416435          | 42132408 | A | 0 | 0      | G |
| 25 | BICF2P821431            | 42140021 | G | 1 | 0.2857 | A |
| 25 | BICF2P468229            | 42172253 | A | 0 | 0      | G |
| 25 | BICF2S2304967           | 42186529 | 0 | 0 | 0      | G |
| 25 | BICF2S23723346          | 42196437 | C | 0 | 0      | A |
| 25 | BICF2S23512435          | 42225089 | A | 1 | 1      | G |
| 25 | BICF2P286869            | 42237279 | 0 | 0 | 0      | A |
| 25 | BICF2P933929            | 42250056 | G | 0 | 0      | A |
| 25 | BICF2P1300962           | 42257644 | A | 0 | 0      | G |
| 25 | BICF2P1199233           | 42262560 | A | 0 | 0      | C |
| 25 | BICF2S23624730          | 42262785 | 0 | 0 | 0      | G |

|    |                         |          |   |   |        |   |
|----|-------------------------|----------|---|---|--------|---|
| 25 | TIGRP2P330861_rs8911623 | 42278365 | A | 1 | 0.2857 | C |
| 25 | BICF2S23528667          | 42292591 | A | 0 | 0      | G |
| 25 | BICF2P1229703           | 42307409 | A | 1 | 1      | C |
| 25 | BICF2P1345556           | 42309109 | G | 1 | 1      | A |
| 25 | BICF2P1358763           | 42316298 | C | 1 | 1      | A |
| 25 | BICF2P359569            | 42328369 | G | 0 | 0      | A |
| 25 | BICF2P248502            | 42331606 | A | 0 | 0      | C |
| 25 | BICF2P215198            | 42344894 | C | 0 | 0.7143 | A |
| 25 | BICF2P850255            | 42358673 | A | 0 | 0.7143 | G |
| 25 | BICF2P1065436           | 42366063 | A | 0 | 0.7143 | G |
| 25 | TIGRP2P330873_rs9056741 | 42383694 | A | 0 | 0      | C |
| 25 | TIGRP2P330874_rs9193730 | 42394522 | C | 0 | 0.7143 | A |
| 25 | BICF2P230763            | 42403675 | G | 0 | 0.7143 | A |
| 25 | TIGRP2P330882_rs8868491 | 42407408 | A | 0 | 0.7143 | G |
| 25 | BICF2S23650525          | 42419186 | A | 0 | 0.7143 | G |
| 25 | BICF2P844742            | 42425150 | A | 0 | 0      | T |
| 25 | BICF2P333555            | 42440825 | A | 0 | 0      | T |
| 25 | TIGRP2P330907_rs8846929 | 42455569 | G | 0 | 0      | A |
| 25 | BICF2P361782            | 42465910 | G | 0 | 0      | C |
| 25 | BICF2S23422184          | 42477095 | A | 0 | 0      | T |
| 25 | BICF2P1264263           | 42508130 | G | 1 | 0.2857 | A |
| 25 | BICF2P229002            | 42519958 | G | 1 | 0.2857 | A |
| 25 | BICF2P1060744           | 42528143 | G | 0 | 0      | A |
| 25 | TIGRP2P330916_rs8608387 | 42533079 | G | 1 | 0.2857 | A |
| 25 | BICF2P541564            | 42540467 | 0 | 0 | 0      | G |
| 25 | BICF2P283247            | 42550271 | A | 1 | 1      | G |
| 25 | BICF2P1242204           | 42571433 | A | 0 | 0.7143 | G |
| 25 | TIGRP2P330934_rs8649842 | 42574165 | A | 0 | 0      | G |
| 25 | BICF2S23616817          | 42585353 | 0 | 0 | 0      | G |
| 25 | BICF2S23622368          | 42600048 | 0 | 0 | 0      | A |
| 25 | TIGRP2P330938_rs8843389 | 42614159 | G | 1 | 1      | A |
| 25 | BICF2S23152191          | 42630154 | A | 1 | 0.2    | G |
| 25 | BICF2P134711            | 42637035 | A | 1 | 1      | G |
| 25 | BICF2P222841            | 42643364 | A | 0 | 0.7143 | G |
| 25 | TIGRP2P330952_rs9010989 | 42654814 | A | 0 | 0      | G |
| 25 | BICF2S23022712          | 42673914 | G | 0 | 0.7143 | A |
| 25 | BICF2P956166            | 42676960 | A | 0 | 0      | G |
| 25 | BICF2P1221429           | 42691640 | G | 0 | 0.7143 | A |
| 25 | BICF2P1093862           | 42701681 | 0 | 0 | 0      | A |
| 25 | BICF2P910748            | 42721719 | A | 1 | 0.2857 | G |
| 25 | BICF2P910753            | 42722642 | C | 1 | 0.2857 | A |
| 25 | BICF2P708892            | 42735950 | A | 0 | 0      | G |
| 25 | BICF2P63496             | 42746240 | A | 0 | 0      | G |
| 25 | BICF2S23313270          | 42759707 | A | 0 | 0      | C |
| 25 | BICF2P1382531           | 42778584 | 0 | 0 | 0      | A |
| 25 | TIGRP2P330997_rs8981147 | 42781360 | 0 | 0 | 0      | G |
| 25 | TIGRP2P331001_rs9031680 | 42791762 | A | 0 | 0      | G |

|    |                          |          |   |     |        |   |
|----|--------------------------|----------|---|-----|--------|---|
| 25 | BICF2P339621             | 42804462 | G | 0   | 0      | A |
| 25 | BICF2P345801             | 42814837 | 0 | 0   | 0      | G |
| 25 | BICF2P1020735            | 42828517 | 0 | 0   | 0      | G |
| 25 | BICF2P1196029            | 42842123 | 0 | 0   | 0      | G |
| 25 | BICF2P447509             | 42853927 | 0 | 0   | 0      | G |
| 25 | BICF2P1244273            | 42874268 | 0 | 0   | 0      | C |
| 25 | BICF2P132625             | 42886561 | A | 0   | 0.7143 | G |
| 25 | TIGRP2P331049_rs17870187 | 42900994 | A | 0   | 0.7143 | C |
| 25 | BICF2P1195201            | 42908139 | G | 1   | 1      | A |
| 25 | BICF2P918012             | 42922577 | G | 1   | 1      | A |
| 25 | BICF2P1297524            | 42930222 | C | 0   | 0      | A |
| 25 | TIGRP2P331080_rs9190507  | 42943352 | A | 0   | 0      | C |
| 25 | TIGRP2P331092_rs8699043  | 42958105 | G | 0   | 0.7143 | A |
| 25 | BICF2P813790             | 42963999 | A | 0   | 0      | C |
| 25 | BICF2P1165915            | 42967770 | A | 0   | 0      | C |
| 25 | BICF2S24416189           | 42982265 | G | 0   | 0      | A |
| 25 | BICF2P970480             | 42982757 | A | 0   | 0      | G |
| 25 | BICF2P1004214            | 42999245 | G | 0   | 0.7143 | A |
| 25 | TIGRP2P331122_rs8706869  | 43014980 | A | 1   | 0.2857 | G |
| 25 | BICF2S23720674           | 43022711 | G | 0   | 0.7143 | A |
| 25 | BICF2S23413120           | 43047018 | A | 0   | 0      | G |
| 25 | TIGRP2P331133_rs17870194 | 43061952 | A | 1   | 1      | G |
| 25 | BICF2P601865             | 43076968 | C | 0   | 0.7143 | A |
| 25 | TIGRP2P331140_rs17870199 | 43079951 | 0 | 0   | 0      | G |
| 25 | BICF2P527280             | 43112611 | A | 1   | 1      | G |
| 25 | BICF2P754408             | 43114147 | C | 1   | 0.2857 | G |
| 25 | BICF2P869922             | 43118956 | G | 1   | 0.3333 | C |
| 25 | BICF2P378282             | 43137523 | A | 0   | 0.7143 | C |
| 25 | BICF2P737497             | 43151822 | A | 0   | 0      | G |
| 25 | BICF2P320283             | 43153643 | A | 0   | 0      | C |
| 25 | BICF2P517605             | 43163923 | A | 1   | 1      | C |
| 25 | TIGRP2P331156_rs9041413  | 43179230 | 0 | 0   | 0      | G |
| 25 | TIGRP2P331159_rs8562470  | 43182683 | G | 0.5 | 0.8571 | A |
| 25 | BICF2P1317883            | 43195141 | A | 0   | 0      | G |
| 25 | BICF2P554782             | 43210952 | G | 0.5 | 0.2    | A |
| 25 | BICF2S2294               | 43219106 | A | 0.5 | 0.8571 | G |
| 25 | BICF2P423828             | 43255059 | 0 | 0   | 0      | G |
| 25 | BICF2S22919659           | 43272339 | C | 0.5 | 0.1429 | G |
| 25 | BICF2P677933             | 43276700 | A | 0   | 0      | G |
| 25 | BICF2S2377054            | 43297232 | G | 0.5 | 0.1429 | C |
| 25 | BICF2P809854             | 43299187 | G | 0   | 0      | C |
| 25 | BICF2P1104874            | 43339156 | A | 0.5 | 0.8571 | G |
| 25 | TIGRP2P331192_rs8725749  | 43353258 | 0 | 0   | 0      | G |
| 25 | BICF2P615717             | 43355871 | G | 1   | 1      | A |
| 25 | BICF2P615713             | 43356501 | G | 0.5 | 0.1429 | A |
| 25 | BICF2P759749             | 43363567 | A | 0   | 0      | G |
| 25 | BICF2P1186614            | 43369071 | G | 1   | 1      | A |

|    |                         |          |   |     |         |   |
|----|-------------------------|----------|---|-----|---------|---|
| 25 | BICF2S23447362          | 43378312 | A | 1   | 1       | G |
| 25 | BICF2S23632728          | 43395946 | 0 | 0   | 0       | A |
| 25 | TIGRP2P331209_rs8914629 | 43405846 | 0 | 0   | 0       | A |
| 25 | BICF2P918821            | 43413086 | T | 0.5 | 0.8571  | A |
| 25 | BICF2S2447079           | 43432065 | A | 0   | 0       | G |
| 25 | BICF2P1281702           | 43446222 | G | 0   | 0       | A |
| 25 | BICF2P902534            | 43452851 | G | 0   | 0       | A |
| 25 | BICF2S23738308          | 43461283 | G | 0   | 0       | A |
| 25 | TIGRP2P331220_rs8895794 | 43476428 | G | 0.5 | 0.1429  | A |
| 25 | TIGRP2P331221_rs8630579 | 43485109 | G | 0.5 | 0.08333 | A |
| 25 | TIGRP2P331223_rs8933188 | 43495780 | G | 0.5 | 0.1429  | A |
| 25 | BICF2S23445991          | 43511232 | A | 0.5 | 0.1429  | G |
| 25 | TIGRP2P331236_rs9107817 | 43519306 | C | 0.5 | 0.1429  | A |
| 25 | BICF2S23726571          | 43528146 | G | 0.5 | 0.1429  | A |
| 25 | BICF2P216040            | 43542566 | 0 | 0   | 0       | G |
| 25 | BICF2P1421554           | 43550728 | A | 0   | 0       | G |
| 25 | BICF2P538355            | 43572078 | A | 1   | 1       | G |
| 25 | BICF2P1502754           | 43581680 | A | 1   | 1       | G |
| 25 | TIGRP2P331256_rs8930613 | 43595126 | G | 0   | 0       | A |
| 25 | BICF2P205353            | 43597217 | G | 0   | 0       | A |
| 25 | BICF2S23415629          | 43616087 | A | 0.5 | 0.8571  | G |
| 25 | BICF2P78829             | 43622204 | A | 0.5 | 0.1429  | G |
| 25 | BICF2P78845             | 43628638 | C | 0.5 | 0.8571  | A |
| 25 | BICF2P815614            | 43635898 | A | 0   | 0       | G |
| 25 | BICF2P803685            | 43646343 | G | 0   | 0       | A |
| 25 | BICF2P1120574           | 43658849 | C | 0   | 0       | A |
| 25 | BICF2P1378995           | 43683528 | 0 | 0   | 0       | C |
| 25 | BICF2S23014605          | 43698081 | A | 0   | 0       | G |
| 25 | BICF2S23715893          | 43706403 | A | 0   | 0       | G |
| 25 | BICF2P645905            | 43713950 | G | 0   | 0       | A |
| 25 | BICF2P1123049           | 43728251 | A | 0   | 0       | G |
| 25 | BICF2S23658299          | 43754687 | 0 | 0   | 0       | G |
| 25 | BICF2S233948            | 43776140 | G | 0   | 0       | A |
| 25 | BICF2S2358241           | 43790614 | C | 1   | 1       | A |
| 25 | TIGRP2P331283_rs9185919 | 43797274 | A | 0   | 0       | G |
| 25 | TIGRP2P331288_rs8904336 | 43823608 | G | 1   | 1       | A |
| 25 | BICF2S22918128          | 43831480 | G | 0.5 | 0.8571  | A |
| 25 | TIGRP2P331303_rs8996227 | 43840135 | G | 0.5 | 0.1429  | A |
| 25 | BICF2P1078891           | 43853880 | A | 0   | 0       | C |
| 25 | BICF2P700756            | 43862038 | G | 0   | 0       | A |
| 25 | TIGRP2P331319_rs8929793 | 43873881 | G | 0   | 0       | A |
| 25 | BICF2P427798            | 43891967 | 0 | 0   | 0       | A |
| 25 | BICF2S22963098          | 43906944 | 0 | 0   | 0       | G |
| 25 | BICF2P597947            | 43916275 | C | 0   | 0       | A |
| 25 | BICF2P743523            | 43926779 | 0 | 0   | 0       | A |
| 25 | BICF2S23737655          | 43930693 | G | 0.5 | 0.8571  | A |
| 25 | BICF2S2442565           | 43942478 | A | 0.5 | 0.8571  | G |

|    |                         |          |   |     |        |   |
|----|-------------------------|----------|---|-----|--------|---|
| 25 | BICF2P744762            | 43953605 | C | 0   | 0      | A |
| 25 | BICF2S23115371          | 43970193 | 0 | 0   | 0      | G |
| 25 | TIGRP2P331325_rs8705260 | 43980115 | A | 0   | 0      | C |
| 25 | BICF2S23622318          | 43992230 | 0 | 0   | 0      | A |
| 25 | BICF2P994265            | 44000132 | G | 0.5 | 0.1429 | A |
| 25 | BICF2P754871            | 44018604 | 0 | 0   | 0      | A |
| 25 | BICF2P321262            | 44022286 | A | 0   | 0      | G |
| 25 | BICF2P882309            | 44037153 | A | 0.5 | 0.1429 | G |
| 25 | BICF2P949446            | 44046798 | C | 0.5 | 0.8571 | A |
| 25 | BICF2P1225886           | 44055169 | G | 0   | 0      | A |
| 25 | BICF2S23234381          | 44059468 | G | 0   | 0      | A |
| 25 | BICF2P671531            | 44071047 | A | 0   | 0      | G |
| 25 | BICF2P181767            | 44080334 | G | 0   | 0      | A |
| 25 | BICF2P1305599           | 44096274 | A | 0   | 0      | T |
| 25 | TIGRP2P331353_rs8570694 | 44127252 | C | 0.5 | 0.1429 | A |
| 25 | BICF2P759159            | 44139921 | A | 0.5 | 0.1429 | G |
| 25 | TIGRP2P331359_rs8972178 | 44153312 | C | 0   | 0      | A |
| 25 | BICF2P1113241           | 44160158 | A | 0   | 0      | G |
| 25 | BICF2P755247            | 44179368 | C | 0   | 0      | A |
| 25 | BICF2P720990            | 44190996 | A | 0   | 0      | G |
| 25 | BICF2P695548            | 44195115 | A | 0   | 0      | G |
| 25 | BICF2P295656            | 44207644 | C | 0   | 0      | A |
| 25 | BICF2P392122            | 44225696 | G | 0   | 0      | A |
| 25 | BICF2S22942692          | 44232322 | G | 0   | 0      | A |
| 25 | BICF2P106536            | 44232863 | A | 0   | 0      | G |
| 25 | BICF2P923154            | 44247059 | A | 0   | 0      | C |
| 25 | TIGRP2P331394_rs8941786 | 44255984 | G | 0   | 0      | A |
| 25 | BICF2S24316157          | 44264150 | A | 0   | 0      | G |
| 25 | BICF2P1472793           | 44276918 | G | 0   | 0      | A |
| 25 | BICF2P795102            | 44287481 | A | 0.5 | 0.1429 | G |
| 25 | BICF2P1079954           | 44299318 | A | 0   | 0      | G |
| 25 | BICF2S23518262          | 44317659 | A | 0   | 0      | G |
| 25 | BICF2P896917            | 44321753 | G | 0.5 | 0.1429 | A |
| 25 | TIGRP2P331407_rs8631495 | 44364562 | 0 | 0   | 0      | G |
| 25 | BICF2S2295307           | 44368867 | C | 0   | 0      | G |
| 25 | TIGRP2P331409_rs8917355 | 44383582 | G | 0.5 | 0.1429 | A |
| 25 | BICF2S23425443          | 44400883 | A | 0   | 0      | G |
| 25 | BICF2P1128142           | 44411847 | G | 0.5 | 0.1429 | A |
| 25 | BICF2P1304989           | 44419645 | G | 0.5 | 0.1429 | A |
| 25 | BICF2P447686            | 44430138 | G | 0   | 0      | A |
| 25 | BICF2S23425816          | 44444836 | G | 0   | 0      | A |
| 25 | BICF2S23420233          | 44452308 | A | 0   | 0      | C |
| 25 | BICF2S2319300           | 44467568 | C | 0   | 0      | A |
| 25 | BICF2S22957148          | 44489697 | G | 0.5 | 0.8571 | A |
| 25 | BICF2G630103373         | 44494673 | A | 0   | 0      | G |
| 25 | BICF2S2317577           | 44505885 | A | 0.5 | 0.1429 | G |
| 25 | BICF2P113752            | 44530496 | 0 | 0   | 0      | C |

|    |                         |          |   |     |        |   |
|----|-------------------------|----------|---|-----|--------|---|
| 25 | BICF2S23343004          | 44542154 | A | 0   | 0      | G |
| 25 | BICF2G630103386         | 44551100 | G | 0.5 | 0.1429 | A |
| 25 | BICF2G630103396         | 44565982 | A | 1   | 1      | G |
| 25 | BICF2G630103414         | 44575501 | G | 0   | 0      | C |
| 25 | BICF2G630103437         | 44589050 | G | 0.5 | 0.1429 | A |
| 25 | BICF2G630103451         | 44598396 | C | 0   | 0      | A |
| 25 | BICF2G630103469         | 44609958 | A | 1   | 1      | G |
| 25 | BICF2P116413            | 44621602 | A | 0   | 0      | G |
| 25 | BICF2G630103484         | 44641654 | O | 0   | 0      | G |
| 25 | BICF2G630103487         | 44645880 | A | 1   | 1      | G |
| 25 | BICF2G630103497         | 44655133 | A | 0.5 | 0.8571 | C |
| 25 | BICF2S2445103           | 44674778 | A | 0   | 0      | G |
| 25 | BICF2G630103538         | 44679653 | A | 0.5 | 0.1429 | G |
| 25 | BICF2G630103558         | 44694433 | T | 0.5 | 0.1429 | A |
| 25 | BICF2G630103592         | 44708461 | A | 0   | 0      | G |
| 25 | BICF2S23655574          | 44727264 | A | 0   | 0      | C |
| 25 | BICF2G630103607         | 44750663 | A | 0   | 0      | C |
| 25 | BICF2G630103624         | 44759964 | C | 1   | 1      | A |
| 25 | BICF2G630103650         | 44771521 | G | 0.5 | 0.1429 | A |
| 25 | BICF2S23452653          | 44782222 | A | 0.5 | 0.8571 | C |
| 25 | BICF2G630103673         | 44793175 | G | 0   | 0      | A |
| 25 | BICF2P1325232           | 44807619 | G | 0   | 0      | A |
| 25 | BICF2G630103707         | 44821318 | A | 0.5 | 0.1429 | C |
| 25 | BICF2G630103733         | 44827258 | A | 0   | 0      | G |
| 25 | BICF2G630103736         | 44845067 | O | 0   | 0      | G |
| 25 | TIGRP2P331502_rs8701671 | 44850074 | A | 0.5 | 0.8571 | G |
| 25 | TIGRP2P331512_rs8996924 | 44878046 | A | 0.5 | 0.1429 | G |
| 25 | BICF2P394053            | 44892704 | A | 0   | 0      | G |
| 25 | BICF2P846217            | 44918318 | A | 0   | 0      | G |
| 25 | TIGRP2P331533_rs8915864 | 44930460 | A | 0.5 | 0.5    | G |
| 25 | TIGRP2P331535_rs8915869 | 44932144 | G | 0   | 0      | A |
| 25 | BICF2G630103813         | 44943078 | G | 0.5 | 0.5    | A |
| 25 | BICF2G630103849         | 44954874 | C | 0   | 0.3571 | A |
| 25 | TIGRP2P331554_rs8912259 | 44973838 | G | 0.5 | 0.5    | A |
| 25 | BICF2S23647442          | 45004303 | G | 0   | 0.3571 | A |
| 25 | BICF2G630103896         | 45012261 | A | 0   | 0.3571 | G |
| 25 | BICF2P1119425           | 45023424 | O | 0   | 0      | A |
| 25 | TIGRP2P331578_rs8753215 | 45038884 | G | 1   | 1      | A |
| 25 | BICF2P29536             | 45045709 | O | 0   | 0      | G |
| 25 | BICF2P721777            | 45057739 | G | 0.5 | 0.8571 | A |
| 25 | BICF2S23649497          | 45078844 | G | 0   | 0.3571 | A |
| 25 | TIGRP2P331606_rs9198176 | 45081116 | A | 0   | 0.3333 | G |
| 25 | TIGRP2P331614_rs8796788 | 45087979 | A | 0   | 0.3571 | G |
| 25 | BICF2P408515            | 45093136 | T | 0   | 0.3571 | A |
| 25 | BICF2P249835            | 45111722 | G | 0   | 0.3571 | A |
| 25 | BICF2G630103911         | 45118809 | A | 0   | 0      | T |
| 25 | BICF2P82089             | 45141106 | G | 0   | 0.3571 | C |

|    |                         |          |   |     |         |   |
|----|-------------------------|----------|---|-----|---------|---|
| 25 | BICF2P263232            | 45154335 | C | 0   | 0.3571  | A |
| 25 | BICF2P825143            | 45164787 | A | 0   | 0.25    | G |
| 25 | BICF2G630103916         | 45176037 | G | 0   | 0       | A |
| 25 | BICF2G630103917         | 45189398 | G | 0.5 | 0.8571  | A |
| 25 | BICF2G630103921         | 45197931 | A | 0.5 | 0.8571  | G |
| 25 | BICF2G630103934         | 45219909 | G | 0.5 | 0.08333 | A |
| 25 | BICF2G630103960         | 45239242 | A | 0.5 | 0.8571  | G |
| 25 | TIGRP2P331635_rs9238952 | 45246282 | A | 0   | 0       | G |
| 25 | BICF2G630103964         | 45258629 | A | 0.5 | 0.8571  | G |
| 25 | BICF2G630104011         | 45286299 | A | 0.5 | 0.1429  | G |
| 25 | BICF2S22916619          | 45298823 | G | 0.5 | 0.1429  | A |
| 25 | BICF2S2301652           | 45315585 | G | 0   | 0       | A |
| 25 | BICF2P663104            | 45329120 | 0 | 0   | 0       | A |
| 25 | BICF2P217508            | 45337160 | A | 0   | 0       | C |
| 25 | BICF2G630104044         | 45351419 | G | 0   | 0       | A |
| 25 | BICF2G630104048         | 45356032 | A | 0   | 0       | G |
| 25 | BICF2P1221999           | 45368233 | A | 0.5 | 0.8571  | C |
| 25 | BICF2G630104066         | 45386733 | G | 0   | 0       | A |
| 25 | BICF2P606658            | 45392740 | G | 0   | 0       | A |
| 25 | TIGRP2P331679_rs8780698 | 45404054 | A | 0   | 0       | C |
| 25 | BICF2P186480            | 45418893 | A | 0   | 0       | G |
| 25 | BICF2G630104103         | 45419239 | A | 0   | 0       | C |
| 25 | BICF2G630104132         | 45428074 | T | 0   | 0       | A |
| 25 | BICF2P960614            | 45430523 | G | 0   | 0       | C |
| 25 | BICF2G630104165         | 45443320 | G | 0.5 | 0.1429  | A |
| 25 | BICF2G630104177         | 45450095 | G | 0   | 0       | A |
| 25 | BICF2G630104201         | 45457655 | A | 0   | 0       | G |
| 25 | BICF2G630104205         | 45460041 | G | 0   | 0       | A |
| 25 | BICF2G630104223         | 45472761 | C | 0   | 0       | A |
| 25 | BICF2G630104232         | 45480381 | C | 0   | 0.3571  | A |
| 25 | BICF2G630104237         | 45484197 | G | 0   | 0.3571  | A |
| 25 | BICF2G630104258         | 45494270 | A | 0   | 0.3571  | G |
| 25 | BICF2S22943902          | 45499666 | A | 0   | 0.3571  | G |
| 25 | BICF2P59260             | 45510924 | A | 0   | 0       | G |
| 25 | BICF2G630104284         | 45523703 | G | 0   | 0.3571  | A |
| 25 | TIGRP2P331718_rs8890006 | 45531190 | G | 1   | 0.6429  | A |
| 25 | BICF2G630104329         | 45540443 | G | 1   | 0.6429  | A |
| 25 | BICF2P944322            | 45553465 | C | 1   | 1       | G |
| 25 | BICF2P40798             | 45572221 | 0 | 0   | 0       | A |
| 25 | BICF2P149497            | 45588311 | 0 | 0   | 0       | A |
| 25 | BICF2S23325704          | 45597939 | T | 0   | 0.3571  | A |
| 25 | BICF2S23536782          | 45615965 | A | 0.5 | 0.5     | C |
| 25 | BICF2G630104360         | 45628500 | G | 1   | 1       | A |
| 25 | BICF2S23449583          | 45645148 | A | 0   | 0.3571  | G |
| 25 | BICF2P693915            | 45661892 | A | 0.5 | 0.5     | G |
| 25 | BICF2G630104379         | 45676709 | A | 0.5 | 0.5     | G |
| 25 | BICF2G630104380         | 45678470 | A | 0.5 | 0.1429  | C |



|    |                         |          |   |     |        |   |
|----|-------------------------|----------|---|-----|--------|---|
| 25 | BICF2G630104399         | 45694195 | T | 0   | 0.3571 | A |
| 25 | BICF2P871632            | 45704657 | A | 0   | 0      | G |
| 25 | BICF2G630104403         | 45722246 | A | 0   | 0      | G |
| 25 | BICF2G630104404         | 45725340 | C | 0   | 0      | G |
| 25 | BICF2P1027020           | 45736805 | A | 0.5 | 0.5    | G |
| 25 | BICF2P1283125           | 45751989 | C | 0   | 0.3571 | A |
| 25 | BICF2G630104410         | 45769931 | A | 0   | 0.3571 | G |
| 25 | BICF2P955513            | 45775051 | 0 | 0   | 0      | G |
| 25 | BICF2P580112            | 45782802 | 0 | 0   | 0      | G |
| 25 | BICF2G630104414         | 45801933 | G | 1   | 0.2857 | A |
| 25 | BICF2S23713669          | 45807143 | A | 1   | 0.6429 | C |
| 25 | TIGRP2P331772_rs9179286 | 45826760 | 0 | 0   | 0      | C |
| 25 | BICF2G630104425         | 45829747 | A | 0   | 0.3571 | G |
| 25 | BICF2S23212357          | 45835001 | A | 0   | 0      | G |
| 25 | BICF2P693144            | 45841176 | A | 0   | 0      | G |
| 25 | TIGRP2P331779_rs8950198 | 45841438 | A | 0   | 0      | C |
| 25 | TIGRP2P331784_rs8871532 | 45852717 | 0 | 0   | 0      | G |
| 25 | BICF2P1342382           | 45870326 | G | 0.5 | 0.1429 | A |
| 25 | BICF2P850286            | 45876235 | G | 0   | 0      | A |
| 25 | BICF2G630104466         | 45895453 | A | 1   | 0.2857 | G |
| 25 | BICF2G630104471         | 45899981 | 0 | 0   | 0      | G |
| 25 | BICF2P211984            | 45914624 | A | 0   | 0      | G |
| 25 | BICF2G630104480         | 45921145 | 0 | 0   | 0      | A |
| 25 | BICF2G630104500         | 45935509 | G | 0.5 | 0.1429 | A |
| 25 | BICF2G630104535         | 45942785 | 0 | 0   | 0      | G |
| 25 | BICF2P23371             | 45955442 | A | 0.5 | 0.5    | G |
| 25 | BICF2G630104603         | 45972613 | G | 0.5 | 0.5    | A |
| 25 | BICF2G630104631         | 45985699 | A | 0.5 | 0.1429 | T |
| 25 | BICF2G630104643         | 45989742 | A | 0.5 | 0.1429 | G |
| 25 | TIGRP2P331828_rs8784611 | 46003578 | C | 0.5 | 0.5    | A |
| 25 | TIGRP2P331838_rs8860375 | 46011672 | 0 | 0   | 0      | A |
| 25 | BICF2P699121            | 46026048 | A | 0.5 | 0.5    | G |
| 25 | TIGRP2P331845_rs9008103 | 46030851 | A | 0   | 0      | G |
| 25 | BICF2P573043            | 46031126 | A | 0.5 | 0.5    | G |
| 25 | BICF2P474625            | 46035367 | A | 1   | 0.6429 | G |
| 25 | BICF2P184787            | 46047272 | C | 0   | 0      | G |
| 25 | BICF2P1351889           | 46063991 | 0 | 0   | 0      | A |
| 25 | BICF2P710014            | 46069725 | G | 0.5 | 0.5    | A |
| 25 | BICF2P1109290           | 46087462 | G | 1   | 0.6429 | A |
| 25 | TIGRP2P331874_rs8807429 | 46094829 | 0 | 0   | 0      | G |
| 25 | BICF2P1331319           | 46104034 | G | 0.5 | 0.1429 | A |
| 25 | TIGRP2P331888_rs8848459 | 46116798 | A | 0   | 0.7143 | G |
| 25 | TIGRP2P331905_rs8680489 | 46135709 | G | 0   | 0      | A |
| 25 | BICF2G630104681         | 46141580 | 0 | 0   | 0      | G |
| 25 | BICF2G630104709         | 46154144 | A | 0.5 | 0.1429 | G |
| 25 | BICF2G630104717         | 46157665 | A | 0.5 | 0.8571 | G |
| 25 | BICF2S23017434          | 46162014 | A | 0   | 0.3571 | G |

|    |                         |          |   |     |        |   |
|----|-------------------------|----------|---|-----|--------|---|
| 25 | BICF2G630104733         | 46174195 | A | 0.5 | 0.5    | G |
| 25 | BICF2G630104758         | 46191701 | 0 | 0   | 0      | T |
| 25 | BICF2G630104764         | 46195937 | A | 0.5 | 0.5    | C |
| 25 | BICF2S23122500          | 46217453 | C | 0.5 | 0.5    | A |
| 25 | BICF2S23536037          | 46221074 | G | 0.5 | 0.5    | A |
| 25 | BICF2G630104789         | 46234279 | A | 0.5 | 0.5    | G |
| 25 | BICF2G630104808         | 46241991 | G | 0   | 0.3571 | A |
| 25 | TIGRP2P331917_rs8618456 | 46253594 | G | 0.5 | 0.5    | C |
| 25 | BICF2G630104829         | 46255601 | G | 0.5 | 0.5    | A |
| 25 | TIGRP2P331922_rs8971548 | 46267935 | A | 0.5 | 0.5    | G |
| 25 | BICF2P280244            | 46281635 | A | 0   | 0      | G |
| 25 | BICF2P198684            | 46288150 | A | 0.5 | 0.5    | G |
| 25 | BICF2G630104900         | 46300235 | A | 0   | 0      | G |
| 25 | BICF2G630104964         | 46324187 | A | 0.5 | 0.5    | G |
| 25 | BICF2G630104989         | 46344241 | G | 0.5 | 0.1429 | A |
| 25 | BICF2P791567            | 46345608 | G | 0   | 0      | A |
| 25 | BICF2P529610            | 46356446 | A | 0   | 0      | G |
| 25 | BICF2G630105012         | 46357869 | A | 0.5 | 0.1429 | C |
| 25 | BICF2G630105028         | 46376882 | A | 0.5 | 0.1429 | G |
| 25 | BICF2P1457230           | 46379546 | A | 0   | 0      | G |
| 25 | BICF2S23139695          | 46392786 | 0 | 0   | 0      | G |
| 25 | BICF2S23752473          | 46403372 | G | 0.5 | 0.5    | A |
| 25 | BICF2P1036097           | 46415954 | 0 | 0   | 0      | A |
| 25 | BICF2G630105087         | 46428315 | G | 0.5 | 0.5    | A |
| 25 | BICF2G630105094         | 46438140 | A | 1   | 0.6429 | G |
| 25 | BICF2G630105110         | 46450807 | A | 0.5 | 0.8571 | G |
| 25 | BICF2G630105125         | 46465704 | 0 | 0   | 0      | G |
| 25 | BICF2G630105132         | 46474402 | A | 0.5 | 0.5    | G |
| 25 | BICF2P1436656           | 46486340 | A | 0.5 | 0.5    | G |
| 25 | BICF2P294005            | 46498711 | A | 0.5 | 0.5    | G |
| 25 | BICF2S23713385          | 46521486 | A | 0.5 | 0.5    | G |
| 25 | BICF2P321141            | 46525000 | A | 0.5 | 0.1429 | G |
| 25 | BICF2P767622            | 46535918 | G | 0.5 | 0.1429 | A |
| 25 | BICF2P231190            | 46551245 | C | 0.5 | 0.5    | A |
| 25 | BICF2S23322767          | 46553243 | A | 0   | 0.3571 | G |
| 25 | BICF2G630105163         | 46567908 | G | NA  | 0.8571 | A |
| 25 | BICF2G630105182         | 46577081 | G | 0   | 0.3571 | A |
| 25 | BICF2G630105207         | 46590178 | G | 0   | 0.3571 | A |
| 25 | BICF2S23345522          | 46607965 | A | 0   | 0.3571 | G |
| 25 | BICF2G630105221         | 46612458 | G | 0   | 0.3571 | A |
| 25 | BICF2G630105236         | 46622856 | A | 0   | 0      | T |
| 25 | BICF2P1188641           | 46635068 | 0 | 0   | 0      | A |
| 25 | BICF2P872193            | 46655807 | 0 | 0   | 0      | A |
| 25 | BICF2P367095            | 46668800 | 0 | 0   | 0      | T |
| 25 | BICF2S23048982          | 46681321 | G | 0.5 | 0.5    | A |
| 25 | BICF2P13066             | 46703318 | A | 0.5 | 0.5    | G |
| 25 | BICF2G630105259         | 46714798 | G | 0.5 | 0.5    | A |

|    |                         |          |   |     |        |   |
|----|-------------------------|----------|---|-----|--------|---|
| 25 | BICF2P90772             | 46725145 | A | 0.5 | 0.1429 | G |
| 25 | TIGRP2P332075_rs8919122 | 46744911 | 0 | 0   | 0      | A |
| 25 | BICF2P423055            | 46772444 | 0 | 0   | 0      | C |
| 25 | G1293f30S165            | 46799139 | G | 0   | 0      | A |
| 25 | BICF2P498952            | 46821129 | 0 | 0   | 0      | A |
| 25 | BICF2P546426            | 46831299 | 0 | 0   | 0      | C |
| 25 | BICF2G630105276         | 46843810 | 0 | 0   | 0      | G |
| 25 | BICF2P1255954           | 46857970 | 0 | 0   | 0      | A |
| 25 | BICF2P121841            | 46863898 | G | 0   | 0.3571 | A |
| 25 | G1294f49S204            | 46893645 | A | 0.5 | 0.1429 | G |
| 25 | TIGRP2P332081_rs9029778 | 46909735 | 0 | 0   | 0      | C |
| 25 | BICF2P133206            | 46923430 | 0 | 0   | 0      | A |
| 25 | G1295f36S48             | 46948121 | 0 | 0   | 0      | C |
| 25 | BICF2G630105279         | 46976927 | 0 | 0   | 0      | A |
| 25 | BICF2S23049709          | 46987850 | A | 0   | 0.3571 | C |
| 25 | BICF2P245245            | 46992655 | G | 0   | 0      | A |
| 25 | BICF2G630105281         | 47019934 | G | 0.5 | 0.1429 | A |
| 25 | BICF2P1411911           | 47030007 | A | 0.5 | 0.5    | G |
| 25 | BICF2S23330496          | 47045452 | G | 0   | 0      | A |
| 25 | BICF2S23629859          | 47056719 | G | 0.5 | 0.5    | A |
| 25 | TIGRP2P332089_rs8809971 | 47069161 | G | 0   | 0.3571 | A |
| 25 | BICF2S23240755          | 47075634 | 0 | 0   | 0      | C |
| 25 | BICF2G630105293         | 47086780 | 0 | 0   | 0      | T |
| 25 | BICF2G630105305         | 47092717 | A | 0   | 0      | G |
| 25 | BICF2S23257680          | 47108723 | G | 0.5 | 0.1429 | A |
| 25 | BICF2P307540            | 47125401 | A | 0   | 0.7143 | C |
| 25 | BICF2G630105309         | 47137204 | A | 0   | 0      | G |
| 25 | BICF2P268738            | 47139845 | C | 0.5 | 0.8571 | G |
| 25 | BICF2G630105321         | 47168388 | A | 1   | 0.2857 | C |
| 25 | BICF2G630105335         | 47175363 | C | 0.5 | 0.8571 | A |
| 25 | BICF2S23438367          | 47176674 | A | 0   | 0      | C |
| 25 | BICF2P984068            | 47189818 | G | 0.5 | 0.8571 | A |
| 25 | TIGRP2P332129_rs8797337 | 47190623 | A | 0.5 | 0.1429 | T |
| 25 | BICF2P971283            | 47199687 | 0 | 0   | 0      | G |
| 25 | TIGRP2P332133_rs9053811 | 47210823 | 0 | 0   | 0      | G |
| 25 | BICF2G630105353         | 47220256 | 0 | 0   | 0      | G |
| 25 | BICF2P1468733           | 47241274 | A | 0.5 | 0.8571 | G |
| 25 | TIGRP2P332150_rs8490326 | 47242183 | 0 | 0   | 0      | C |
| 25 | BICF2S23536272          | 47263483 | C | 0   | 0.7143 | A |
| 25 | BICF2G630105367         | 47264274 | G | 0   | 0.7143 | A |
| 25 | TIGRP2P332152_rs8869367 | 47270358 | A | 0   | 0      | G |
| 25 | BICF2G630105390         | 47279793 | G | 0   | 0      | A |
| 25 | BICF2G630105392         | 47280156 | A | 0   | 0      | G |
| 25 | BICF2G630105398         | 47305600 | G | 1   | 0.2857 | A |
| 25 | BICF2G630105413         | 47321422 | G | 0   | 0      | A |
| 25 | BICF2P1119332           | 47327568 | 0 | 0   | 0      | A |
| 25 | BICF2S23433289          | 47336832 | G | 0.5 | 0.1429 | A |

|    |                         |          |   |     |        |   |
|----|-------------------------|----------|---|-----|--------|---|
| 25 | BICF2P795784            | 47353024 | A | 0.5 | 0.8571 | T |
| 25 | BICF2G630105421         | 47369985 | G | 0   | 0      | A |
| 25 | BICF2G630105425         | 47386264 | A | 0   | 0      | C |
| 25 | BICF2G630105430         | 47400468 | A | 0   | 0      | G |
| 25 | BICF2P1366479           | 47419875 | 0 | 0   | 0      | G |
| 25 | BICF2G630105437         | 47430139 | G | 0   | 0      | A |
| 25 | BICF2G630105442         | 47442708 | G | 0   | 0      | A |
| 25 | BICF2P514342            | 47452430 | 0 | 0   | 0      | G |
| 25 | BICF2P526197            | 47471549 | A | 0   | 0.7143 | G |
| 25 | BICF2G630105449         | 47479963 | G | 0   | 0      | A |
| 25 | BICF2G630105453         | 47485899 | G | 0   | 0      | A |
| 25 | BICF2P393861            | 47495666 | A | 0.5 | 0.1429 | G |
| 25 | BICF2G630105494         | 47508960 | G | 0   | 0      | A |
| 25 | BICF2G630105512         | 47523118 | G | 0.5 | 0.1429 | A |
| 25 | BICF2P320510            | 47531764 | A | 1   | 1      | G |
| 25 | BICF2G630105524         | 47545756 | A | 0   | 0      | G |
| 25 | BICF2G630105540         | 47553844 | A | 0   | 0.7143 | G |
| 25 | BICF2G630105589         | 47577859 | A | 0   | 0      | C |
| 25 | BICF2G630105605         | 47588574 | G | 1   | 0.2857 | C |
| 25 | BICF2P282545            | 47590707 | G | 1   | 0.2857 | A |
| 25 | BICF2G630105632         | 47598892 | T | 0.5 | 0.1429 | A |
| 25 | BICF2G630105651         | 47612990 | G | 1   | 0.6429 | A |
| 25 | BICF2P368489            | 47615369 | A | 0   | 0.3571 | G |
| 25 | BICF2G630105674         | 47632781 | C | 0   | 0.3571 | G |
| 25 | BICF2G630105675         | 47632890 | G | 0   | 0.3571 | A |
| 25 | BICF2P1148703           | 47644091 | C | 0   | 0      | A |
| 25 | TIGRP2P332210_rs8704149 | 47644147 | G | 0   | 0      | A |
| 25 | BICF2P325555            | 47651064 | A | 0   | 0      | G |
| 25 | BICF2P106650            | 47658585 | A | 0   | 0      | G |
| 25 | BICF2P791136            | 47678345 | A | 0.5 | 0.1429 | G |
| 25 | BICF2G630105727         | 47680496 | G | 0.5 | 0.1429 | A |
| 25 | BICF2G630105772         | 47693441 | A | 0   | 0      | G |
| 25 | BICF2G630105791         | 47704326 | G | 0   | 0      | A |
| 25 | BICF2G630105808         | 47715149 | G | 0.5 | 0.1429 | A |
| 25 | BICF2P95485             | 47722024 | G | 0.5 | 0.1429 | A |
| 25 | BICF2G630105817         | 47732327 | G | 0   | 0.75   | A |
| 25 | BICF2G630105819         | 47737823 | G | 0   | 0      | A |
| 25 | BICF2P888287            | 47754526 | A | 0   | 0      | G |
| 25 | BICF2P137558            | 47770217 | G | 0   | 0      | A |
| 25 | TIGRP2P332259_rs9210244 | 47778707 | G | 0   | 0      | A |
| 25 | BICF2S23252222          | 47785111 | A | 0   | 0      | G |
| 25 | BICF2P585195            | 47799869 | A | 0   | 0      | G |
| 25 | BICF2S22963010          | 47807690 | A | 0   | 0      | G |
| 25 | BICF2P1468157           | 47819645 | A | 0   | 0      | G |
| 25 | BICF2P635621            | 47839621 | G | 0   | 0      | A |
| 25 | BICF2P635623            | 47839721 | A | 0   | 0      | G |
| 25 | BICF2P1177533           | 47850003 | G | 0   | 0      | A |

|    |                         |          |   |     |         |   |
|----|-------------------------|----------|---|-----|---------|---|
| 25 | BICF2P1317588           | 47856708 | A | 0   | 0       | G |
| 25 | BICF2P1318363           | 47869397 | A | 0   | 0       | G |
| 25 | TIGRP2P332321_rs8816126 | 47876597 | A | 0   | 0       | G |
| 25 | BICF2P942493            | 47896345 | C | 0   | 0       | A |
| 25 | BICF2P309588            | 47899484 | G | 0   | 0       | A |
| 25 | TIGRP2P332326_rs9161352 | 47909072 | C | 0   | 0.7143  | G |
| 25 | BICF2P647537            | 47921325 | G | 0   | 0       | A |
| 25 | BICF2P179973            | 47939328 | G | 0   | 0.7143  | A |
| 25 | BICF2P808668            | 47953431 | A | 0   | 0       | G |
| 25 | BICF2P720179            | 47960352 | 0 | 0   | 0       | G |
| 25 | BICF2P854324            | 47971878 | G | 0.5 | 0.1429  | A |
| 25 | BICF2S22917692          | 47980133 | C | 0.5 | 0.1429  | A |
| 25 | TIGRP2P332346_rs8534807 | 47991699 | C | 0.5 | 0.1429  | A |
| 25 | BICF2P598137            | 48004569 | G | 0   | 0       | A |
| 25 | TIGRP2P332354_rs9187730 | 48021832 | A | 0.5 | 0.08333 | G |
| 25 | BICF2P991752            | 48026912 | A | 0.5 | 0.1429  | C |
| 25 | TIGRP2P332372_rs8771596 | 48035974 | A | 0.5 | 0.1429  | G |
| 25 | BICF2S23647925          | 48047936 | A | 0   | 0       | G |
| 25 | BICF2G630105888         | 48082151 | G | 0   | 0       | A |
| 25 | BICF2P445940            | 48126213 | A | 0   | 0       | G |
| 25 | BICF2P28506             | 48134945 | G | 0.5 | 0.1429  | A |
| 25 | BICF2S23525581          | 48147815 | 0 | 0   | 0       | G |
| 25 | BICF2P366441            | 48168919 | A | 0   | 0       | C |
| 25 | TIGRP2P332533_rs9104189 | 48169176 | G | 0   | 0       | A |
| 25 | BICF2P1292952           | 48172529 | G | 0   | 0       | A |
| 25 | BICF2P1182378           | 48177212 | G | 0   | 0       | C |
| 25 | BICF2P261971            | 48180101 | T | 0   | 0       | A |
| 25 | BICF2P809152            | 48181331 | C | 0   | 0       | A |
| 25 | BICF2P740870            | 48186366 | A | 0   | 0       | C |
| 25 | BICF2P691524            | 48198488 | A | 0   | 0       | G |
| 25 | TIGRP2P332545_rs8557295 | 48213727 | G | 0.5 | 0.1429  | A |
| 25 | BICF2P103195            | 48229675 | 0 | 0   | 0       | A |
| 25 | BICF2P1411287           | 48241209 | C | 0   | 0       | A |
| 25 | BICF2P413866            | 48246591 | G | 0   | 0.7143  | A |
| 25 | BICF2P1289422           | 48263832 | 0 | 0   | 0       | C |
| 25 | TIGRP2P332570_rs8969952 | 48275257 | G | 0   | 0       | A |
| 25 | BICF2P634744            | 48281961 | A | 0   | 0       | T |
| 25 | TIGRP2P332593_rs8826811 | 48289685 | A | 0   | 0       | C |
| 25 | BICF2P287069            | 48306527 | A | NA  | 0       | G |
| 25 | BICF2S23330039          | 48313297 | A | NA  | 0       | G |
| 25 | BICF2P375869            | 48320833 | G | 0   | 0       | A |
| 25 | BICF2P375866            | 48321105 | A | 0   | 0       | G |
| 25 | BICF2P375863            | 48321482 | A | 0.5 | 0.1429  | G |
| 25 | TIGRP2P332662_rs9115525 | 48331785 | 0 | 0   | 0       | A |
| 25 | TIGRP2P332670_rs8569629 | 48340603 | G | 0   | 0       | A |
| 25 | BICF2P1207795           | 48350837 | C | 0.5 | 0.5     | G |
| 25 | BICF2S23527984          | 48360568 | A | 1   | 0.6429  | G |

|    |                         |          |   |     |        |   |
|----|-------------------------|----------|---|-----|--------|---|
| 25 | BICF2S23722419          | 48378443 | A | 0   | 0.3571 | G |
| 25 | BICF2S23547519          | 48380983 | T | 0   | 0.3571 | A |
| 25 | TIGRP2P332703_rs9142681 | 48395663 | G | 0.5 | 0.1429 | A |
| 25 | BICF2S23519543          | 48436684 | A | 0   | 0      | G |
| 25 | BICF2S23328697          | 48447455 | A | 0   | 0      | G |
| 25 | BICF2P1326525           | 48454294 | A | 0.5 | 0.5    | G |
| 25 | BICF2P1326531           | 48455885 | A | 0.5 | 0.5    | G |
| 25 | BICF2P1150083           | 48461215 | A | 0.5 | 0.5    | G |
| 25 | BICF2S23618735          | 48464150 | G | 0   | 0.3571 | A |
| 25 | BICF2P775646            | 48472107 | G | 0.5 | 0.5    | A |
| 25 | BICF2S23058329          | 48477519 | A | 0   | 0.3571 | G |
| 25 | TIGRP2P332730_rs8893058 | 48485903 | G | 1   | 1      | A |
| 25 | TIGRP2P332733_rs9139173 | 48498166 | A | 1   | 0.6429 | G |
| 25 | TIGRP2P332742_rs8577424 | 48516174 | A | 0.5 | 0.5    | G |
| 25 | BICF2S23439226          | 48526777 | A | 0.5 | 0.1429 | G |
| 25 | BICF2P502582            | 48530164 | G | 1   | 0.6429 | A |
| 25 | BICF2P947671            | 48550974 | A | 0.5 | 0.5    | G |
| 25 | BICF2P546834            | 48562664 | A | 0.5 | 0.5    | G |
| 25 | BICF2P574815            | 48572463 | A | 0   | 0      | G |
| 25 | BICF2P303534            | 48578216 | C | 0.5 | 0.5    | A |
| 25 | BICF2P1186918           | 48592630 | G | 0.5 | 0.5    | A |
| 25 | BICF2P414278            | 48599448 | C | 0.5 | 0.5    | A |
| 25 | TIGRP2P332801_rs8957303 | 48612213 | A | 0.5 | 0.1429 | G |
| 25 | BICF2P1324781           | 48631822 | A | 0   | 0      | G |
| 25 | BICF2P1345454           | 48635592 | 0 | 0   | 0      | G |
| 25 | BICF2P1006240           | 48645400 | G | 0   | 0      | A |
| 25 | BICF2S23649867          | 48663159 | A | 0   | 0      | G |
| 25 | BICF2P1282724           | 48673238 | A | 0   | 0      | G |
| 25 | BICF2S23757961          | 48690351 | A | 0.5 | 0.1429 | G |
| 25 | BICF2S23211082          | 48696598 | G | 0.5 | 0.1429 | A |
| 25 | BICF2P594212            | 48705847 | A | 0   | 0      | G |
| 25 | BICF2S234652            | 48714132 | A | 0   | 0      | G |
| 25 | BICF2S23011194          | 48726228 | A | 0.5 | 0.1429 | G |
| 25 | BICF2P743937            | 48746503 | 0 | 0   | 0      | C |
| 25 | BICF2S23130941          | 48756726 | A | 0   | 0      | G |
| 25 | BICF2P750483            | 48766910 | A | 0   | 0      | G |
| 25 | BICF2P1083085           | 48776175 | 0 | 0   | 0      | G |
| 25 | BICF2P196479            | 48792721 | T | 0   | 0      | A |
| 25 | BICF2S23543873          | 48793115 | A | 0   | 0      | G |
| 25 | BICF2S23544467          | 48796955 | A | 0.5 | 0.5    | G |
| 25 | TIGRP2P332930_rs9162513 | 48815410 | A | 0   | 0      | G |
| 25 | TIGRP2P332944_rs9039975 | 48825790 | A | 0.5 | 0.5    | G |
| 25 | BICF2P932489            | 48834807 | G | 0   | 0      | A |
| 25 | BICF2P1014254           | 48847783 | A | 0   | 0      | G |
| 25 | BICF2P30717             | 48857314 | A | 0   | 0      | G |
| 25 | BICF2S230229            | 48866846 | G | 0   | 0      | A |
| 25 | BICF2P1315799           | 48879978 | A | 0   | 0      | G |

|    |                         |          |   |      |        |   |
|----|-------------------------|----------|---|------|--------|---|
| 25 | BICF2S23529321          | 48892283 | A | 0    | 0      | C |
| 25 | BICF2P216829            | 48906876 | A | 0    | 0      | G |
| 25 | BICF2S23134431          | 48918968 | C | 1    | 1      | A |
| 25 | BICF2P284078            | 48927838 | A | 0    | 0      | G |
| 25 | TIGRP2P332999_rs8800391 | 48943151 | 0 | 0    | 0      | A |
| 25 | BICF2S23653533          | 48948856 | A | 0.5  | 0.5    | G |
| 25 | BICF2P519630            | 48963769 | A | 0.5  | 0.5    | G |
| 25 | TIGRP2P333008_rs8646888 | 48969871 | A | 0    | 0      | G |
| 25 | BICF2P715172            | 48972961 | A | 0    | 0      | G |
| 25 | BICF2S24321037          | 48980899 | G | 0    | 0.3571 | A |
| 25 | BICF2S23135796          | 48992407 | A | 0.5  | 0.5    | G |
| 25 | BICF2P128031            | 49005662 | A | 0.5  | 0.5    | G |
| 25 | BICF2P982542            | 49013595 | A | 0.75 | 0.6429 | G |
| 25 | BICF2S23041306          | 49029319 | G | 0    | 0      | C |
| 25 | BICF2P141543            | 49045607 | G | 0    | 0      | A |
| 25 | BICF2P241049            | 49049875 | A | 0.25 | 0.1429 | C |
| 25 | BICF2P1255884           | 49079990 | 0 | 0    | 0      | C |
| 25 | TIGRP2P333068_rs8856439 | 49085278 | G | 0    | 0      | A |
| 25 | TIGRP2P333071_rs9030410 | 49094035 | A | 0.75 | 0.6429 | G |
| 25 | BICF2P97673             | 49105198 | A | 0.5  | 0.5    | G |
| 25 | BICF2P1395278           | 49124165 | G | 0    | 0      | A |
| 25 | BICF2S2314886           | 49132713 | A | 0.25 | 0.1429 | G |
| 25 | BICF2S23026356          | 49148373 | A | 0    | 0      | G |
| 25 | BICF2P736896            | 49153607 | A | 0.75 | 0.8571 | G |
| 25 | BICF2S2324691           | 49157705 | A | 0.25 | 0.3571 | C |
| 25 | BICF2P435435            | 49160677 | A | 0.25 | 0.1429 | G |
| 25 | BICF2S22930116          | 49162527 | G | 0.5  | 0.5    | A |
| 25 | BICF2P596419            | 49177232 | A | 0.25 | 0.3571 | G |
| 25 | BICF2P319967            | 49194017 | G | 0.5  | 0.5    | A |
| 25 | BICF2P91250             | 49203639 | G | 0.75 | 0.6429 | A |
| 25 | BICF2P42167             | 49217491 | C | 0.75 | 0.6429 | A |
| 25 | BICF2P1229139           | 49230985 | G | 0.25 | 0.3571 | C |
| 25 | BICF2P830127            | 49241937 | G | 0.75 | 0.6429 | A |
| 25 | BICF2P830128            | 49242740 | A | 0.75 | 0.6429 | G |
| 25 | BICF2P1295383           | 49248684 | A | 1    | 1      | G |
| 25 | BICF2S23520078          | 49254841 | A | 0    | 0      | C |
| 25 | BICF2S23049088          | 49269356 | A | 0    | 0      | G |
| 25 | BICF2S23637054          | 49278617 | 0 | 0    | 0      | G |
| 25 | TIGRP2P333166_rs9067510 | 49306645 | A | 0    | 0      | G |
| 25 | BICF2P263072            | 49320429 | A | 0    | 0      | G |
| 25 | BICF2P621174            | 49323522 | G | 0    | 0      | A |
| 25 | BICF2S23357094          | 49341591 | A | 1    | 1      | G |
| 25 | BICF2P1453501           | 49350905 | A | 0    | 0      | G |
| 25 | BICF2P418213            | 49360463 | A | 0    | 0      | G |
| 25 | TIGRP2P333228_rs9039494 | 49375352 | G | 0    | 0      | A |
| 25 | BICF2P883164            | 49387324 | C | 0    | 0      | A |
| 25 | BICF2P1510678           | 49394000 | A | 0    | 0      | G |

|    |                         |          |   |      |        |   |
|----|-------------------------|----------|---|------|--------|---|
| 25 | TIGRP2P333253_rs8907891 | 49406692 | G | 0    | 0      | A |
| 25 | TIGRP2P333270_rs8521051 | 49415744 | G | 0    | 0      | A |
| 25 | TIGRP2P333303_rs9113943 | 49431920 | A | 1    | 1      | G |
| 25 | TIGRP2P333312_rs9040121 | 49446503 | G | 1    | 1      | A |
| 25 | TIGRP2P333319_rs9047041 | 49459781 | A | 0    | 0      | C |
| 25 | BICF2P488638            | 49459891 | C | 0    | 0      | A |
| 25 | BICF2P298790            | 49465352 | 0 | 0    | 0      | C |
| 25 | BICF2P1401014           | 49480295 | G | 0    | 0      | A |
| 25 | BICF2P311991            | 49488936 | 0 | 0    | 0      | G |
| 25 | BICF2G630160798         | 49496694 | A | 1    | 1      | G |
| 25 | BICF2P1297340           | 49517068 | A | 0    | 0      | G |
| 25 | TIGRP2P333338_rs9121235 | 49523463 | C | 0    | 0      | A |
| 25 | TIGRP2P333355_rs8928624 | 49537375 | A | 1    | 1      | G |
| 25 | BICF2S2349340           | 49543575 | A | 1    | 1      | G |
| 25 | BICF2G630160775         | 49552187 | A | 1    | 1      | G |
| 25 | BICF2G630160765         | 49553554 | C | 0    | 0      | A |
| 25 | BICF2G630160749         | 49568967 | A | 0    | 0      | G |
| 25 | BICF2G630160743         | 49579805 | G | 1    | 1      | A |
| 25 | BICF2G630160721         | 49596882 | G | 0    | 0      | A |
| 25 | BICF2G630160719         | 49599936 | A | 1    | 1      | G |
| 25 | TIGRP2P333387_rs9038649 | 49616212 | A | 0    | 0      | G |
| 25 | BICF2G630160695         | 49624533 | G | 1    | 1      | A |
| 25 | BICF2G630160626         | 49640776 | A | 0    | 0      | G |
| 25 | BICF2G630160584         | 49653135 | A | 1    | 1      | C |
| 25 | BICF2G630160583         | 49653347 | A | 0.25 | 0.3571 | C |
| 25 | BICF2G630160578         | 49657425 | G | 0    | 0      | A |
| 25 | BICF2G630160545         | 49669331 | G | 0.25 | 0.3571 | A |
| 25 | BICF2G630160518         | 49680998 | A | 1    | 1      | G |
| 25 | BICF2G630160493         | 49693461 | G | 0.75 | 0.6429 | C |
| 25 | BICF2S23147472          | 49705866 | G | 0    | 0      | A |
| 25 | TIGRP2P333405_rs8745631 | 49715550 | 0 | 0    | 0      | A |
| 25 | TIGRP2P333407_rs8697749 | 49732384 | 0 | 0    | 0      | C |
| 25 | BICF2P282365            | 49742117 | G | 0    | 0      | A |
| 25 | BICF2G630160424         | 49759646 | A | 0    | 0      | C |
| 25 | BICF2S23158773          | 49761338 | A | 0    | 0      | C |
| 25 | BICF2G630160389         | 49772142 | A | 0.75 | 0.6429 | G |
| 25 | BICF2G630160338         | 49794514 | G | 0.75 | 0.6429 | A |
| 25 | BICF2G630160294         | 49802933 | G | 1    | 1      | A |
| 25 | BICF2G630160285         | 49806746 | A | 0    | 0      | G |
| 25 | TIGRP2P333449_rs8885400 | 49818542 | A | 0.75 | 0.6429 | G |
| 25 | BICF2G630160271         | 49831902 | A | 1    | 0.6429 | G |
| 25 | BICF2G630160242         | 49840449 | A | 1    | 0.6429 | G |
| 25 | BICF2S22935949          | 49841761 | A | 0    | 0      | G |
| 25 | BICF2P1461096           | 49858895 | C | 0    | 0      | G |
| 25 | BICF2G630160240         | 49874459 | A | 1    | 1      | G |
| 25 | BICF2G630160236         | 49878032 | A | 1    | 1      | G |
| 25 | BICF2G630160225         | 49885408 | G | 0    | 0      | A |



|    |                         |          |   |      |        |   |
|----|-------------------------|----------|---|------|--------|---|
| 25 | BICF2G630160206         | 49897103 | G | 0    | 0      | A |
| 25 | BICF2G630160192         | 49900878 | A | 0    | 0      | G |
| 25 | BICF2S23215214          | 49914303 | 0 | 0    | 0      | G |
| 25 | BICF2G630160180         | 49941939 | A | 0    | 0      | G |
| 25 | BICF2P942081            | 49945744 | A | 0    | 0      | C |
| 25 | BICF2S23125237          | 49968174 | 0 | 0    | 0      | C |
| 25 | BICF2S23244578          | 50001702 | 0 | 0    | 0      | G |
| 25 | BICF2S23240316          | 50005245 | A | 0    | 0      | G |
| 25 | BICF2G630160157         | 50035507 | A | 0    | 0      | C |
| 25 | BICF2P169377            | 50051508 | A | 0    | 0      | C |
| 25 | BICF2P910432            | 50067112 | G | 0.75 | 0.2857 | C |
| 25 | BICF2P910427            | 50067396 | G | 0    | 0      | A |
| 25 | BICF2P910426            | 50067439 | A | 0.75 | 0.25   | C |
| 25 | BICF2P571312            | 50071454 | A | 0.75 | 0.2857 | G |
| 25 | BICF2P133706            | 50090253 | A | 0    | 0      | G |
| 25 | TIGRP2P333473_rs8840087 | 50105240 | G | 0    | 0      | A |
| 25 | BICF2P1087552           | 50113041 | G | 0.75 | 0.2857 | A |
| 25 | BICF2P306659            | 50123667 | A | 0    | 0      | G |
| 25 | BICF2P601240            | 50131092 | G | 0    | 0      | A |
| 25 | BICF2S23759410          | 50145266 | G | 0    | 0      | A |
| 25 | BICF2G630160090         | 50182570 | A | 0    | 0      | G |
| 25 | BICF2G630160086         | 50188771 | A | 0    | 0      | C |
| 25 | BICF2G630160062         | 50200893 | A | 0    | 0      | G |
| 25 | BICF2S24512480          | 50211213 | G | 0    | 0      | A |
| 25 | BICF2G630160027         | 50215021 | A | 0.25 | 0.7143 | G |
| 25 | BICF2G630160023         | 50216801 | G | 0.25 | 0.7143 | A |
| 25 | BICF2G630160005         | 50228063 | C | 0.25 | 0.7143 | G |
| 25 | BICF2G630159993         | 50234357 | G | 0    | 0      | A |
| 25 | BICF2G630159967         | 50247203 | G | 0.25 | 0.7143 | A |
| 25 | BICF2G630159925         | 50275822 | A | 0    | 0      | G |
| 25 | BICF2G630159923         | 50276695 | C | 0    | 0      | A |
| 25 | BICF2S22959473          | 50283059 | A | 0    | 0      | C |
| 25 | BICF2S23736509          | 50289702 | G | 0    | 0      | A |
| 25 | BICF2G630159874         | 50302471 | C | 0    | 0      | A |
| 25 | BICF2G630159817         | 50326040 | G | 0    | 0      | A |
| 25 | BICF2G630159792         | 50340563 | G | 0.5  | 0.1429 | A |
| 25 | BICF2G630159768         | 50357167 | A | 0.5  | 0.1429 | C |
| 25 | BICF2G630159751         | 50360809 | G | 0.5  | 0.1429 | A |
| 25 | BICF2P1097253           | 50366733 | A | 0    | 0      | T |
| 25 | BICF2G630159707         | 50386794 | G | 0.25 | 0.7143 | A |
| 25 | BICF2G630159679         | 50396524 | G | 0.25 | 0.7143 | A |
| 25 | BICF2G630159620         | 50413592 | A | 0    | 0.875  | C |
| 25 | BICF2G630159619         | 50414039 | A | 0.5  | 0.1429 | G |
| 25 | BICF2P1356389           | 50418923 | G | 0    | 0      | A |
| 25 | BICF2G630159571         | 50433276 | A | 0.5  | 0.1429 | G |
| 25 | BICF2P1129338           | 50443381 | G | 0    | 0      | A |
| 25 | BICF2S23326253          | 50458035 | A | 0    | 0      | G |

|    |                         |          |   |      |        |   |
|----|-------------------------|----------|---|------|--------|---|
| 25 | BICF2S23326254          | 50458146 | A | 1    | 1      | G |
| 25 | BICF2S2368608           | 50467175 | A | 0    | 0      | C |
| 25 | BICF2G630159401         | 50481172 | C | 0.5  | 0.8571 | G |
| 25 | BICF2G630159364         | 50495306 | A | 0.25 | 0.7143 | G |
| 25 | BICF2G630159359         | 50502059 | C | 1    | 0.25   | A |
| 25 | BICF2G630159350         | 50517562 | A | 0.25 | 0.75   | G |
| 25 | BICF2S23016577          | 50517898 | G | 0.25 | 0.1429 | A |
| 25 | BICF2P835304            | 50521455 | A | 0.25 | 0.1429 | G |
| 25 | TIGRP2P333636_rs8823900 | 50535390 | A | 0.25 | 0.1429 | C |
| 25 | BICF2P337804            | 50546625 | G | 0.25 | 0.1429 | A |
| 25 | BICF2P288301            | 50555663 | 0 | 0    | 0      | G |
| 25 | BICF2G630159333         | 50569528 | G | 0.5  | 0.1429 | A |
| 25 | BICF2G630159275         | 50579034 | A | 1    | 1      | G |
| 25 | BICF2S23437752          | 50589048 | A | 0    | 0      | G |
| 25 | BICF2P1416744           | 50608337 | A | 0    | 0      | G |
| 25 | BICF2S23443797          | 50621660 | A | 0    | 0      | G |
| 25 | BICF2S23442986          | 50624976 | G | 0    | 0      | A |
| 25 | BICF2G630159246         | 50637313 | A | 0.75 | 0.8571 | G |
| 25 | BICF2G630159225         | 50650222 | G | 0.75 | 0.8571 | A |
| 25 | BICF2P216732            | 50657854 | A | 0.75 | 0.8571 | G |
| 25 | BICF2S23344541          | 50664181 | T | 0    | 0      | A |
| 25 | BICF2G630159192         | 50667297 | A | 0    | 0      | G |
| 25 | BICF2S23654534          | 50671016 | G | 0    | 0      | A |
| 25 | BICF2S23159682          | 50681692 | G | 0    | 0      | A |
| 25 | BICF2P353343            | 50705185 | 0 | 0    | 0      | C |
| 25 | BICF2P1294390           | 50715312 | 0 | 0    | 0      | C |
| 25 | BICF2G630159183         | 50731731 | A | 0    | 0.1429 | G |
| 25 | BICF2G630159177         | 50747298 | A | 0    | 0      | G |
| 25 | BICF2G630159168         | 50751553 | A | 0.75 | 0.8571 | G |
| 25 | BICF2G630159142         | 50774487 | C | 0.25 | 0.1429 | A |
| 25 | BICF2P878461            | 50792545 | A | 0    | 0      | G |
| 25 | BICF2P878462            | 50793086 | A | 0    | 0      | G |
| 25 | BICF2G630159114         | 50798221 | G | 0    | 0      | A |
| 25 | BICF2S24112438          | 50815850 | A | 1    | 1      | G |
| 25 | TIGRP2P333746_rs8800385 | 50833362 | G | 1    | 1      | A |
| 25 | BICF2P431497            | 50848182 | A | 0    | 0      | G |
| 25 | BICF2P844744            | 50855430 | G | 0    | 0      | A |
| 25 | BICF2G630159091         | 50874269 | A | 0    | 0.25   | C |
| 25 | BICF2P830384            | 50894605 | A | 0    | 0      | G |
| 25 | TIGRP2P333790_rs9085656 | 50901013 | A | 0    | 0      | G |
| 25 | TIGRP2P333795_rs8600681 | 50912203 | A | 0    | 0      | G |
| 25 | TIGRP2P333798_rs9185460 | 50922208 | A | 0.25 | 0.1429 | G |
| 25 | BICF2G630159008         | 50940427 | G | 0.75 | 0.5714 | A |
| 25 | BICF2G630158964         | 50948142 | A | 0    | 0.2857 | G |
| 25 | BICF2G630158948         | 50957249 | A | 0    | 0.2857 | C |
| 25 | BICF2G630158945         | 50979276 | A | 0.75 | 0.5714 | G |
| 25 | BICF2G630158941         | 50980806 | G | 0    | 0.2857 | A |

|    |                         |          |   |      |        |   |
|----|-------------------------|----------|---|------|--------|---|
| 25 | BICF2P730502            | 50998233 | C | 0    | 0      | G |
| 25 | BICF2G630158903         | 51010615 | A | 0    | 0.2857 | C |
| 25 | TIGRP2P333832_rs8742184 | 51019817 | G | 0    | 0      | A |
| 25 | BICF2P1083123           | 51020856 | G | 0    | 0      | A |
| 25 | BICF2G630158873         | 51026062 | A | 0.75 | 0.5714 | C |
| 25 | BICF2S2305508           | 51047428 | G | 0    | 0.2857 | A |
| 25 | BICF2P518455            | 51057373 | C | 0.75 | 0.8571 | A |
| 25 | BICF2P815953            | 51063342 | T | 0    | 0      | A |
| 25 | BICF2P207369            | 51071516 | G | 0.25 | 0.1429 | A |
| 25 | TIGRP2P333894_rs9030847 | 51086791 | C | 0    | 0      | A |
| 25 | BICF2P1219656           | 51105133 | G | 0.75 | 0.8571 | A |
| 25 | BICF2P327990            | 51107060 | G | 0.75 | 0.8571 | A |
| 25 | BICF2P909436            | 51127510 | G | 0    | 0      | C |
| 25 | BICF2P770517            | 51155516 | G | 1    | 1      | A |
| 25 | TIGRP2P333930_rs8653998 | 51171508 | C | 0    | 0.25   | A |
| 25 | BICF2P952886            | 51175410 | A | 0.25 | 0.1429 | G |
| 25 | BICF2S23251862          | 51195734 | A | 0.25 | 0.4286 | G |
| 25 | TIGRP2P333972_rs8758243 | 51208992 | G | 0    | 0.2857 | A |
| 25 | TIGRP2P333976_rs9172721 | 51210952 | A | 0    | 0.2857 | G |
| 25 | BICF2P296614            | 51224436 | A | 0    | 0      | C |
| 25 | BICF2P229247            | 51232707 | A | 0.25 | 0.1429 | C |
| 25 | TIGRP2P334011_rs9149492 | 51243852 | 0 | 0    | 0      | G |
| 25 | BICF2P785021            | 51248640 | A | 0.25 | 0.4286 | G |
| 25 | BICF2G630158855         | 51256971 | C | 0.25 | 0.3571 | G |
| 25 | BICF2G630158852         | 51268148 | G | 0.5  | 0.5    | A |
| 25 | BICF2G630158814         | 51279914 | G | 0.5  | 0.5    | C |
| 25 | BICF2G630158809         | 51291316 | G | 0.5  | 0.5    | A |
| 25 | BICF2G630158793         | 51303898 | A | 0.25 | 0.3333 | G |
| 25 | BICF2P717656            | 51316260 | A | 0.75 | 0.5714 | G |
| 25 | BICF2G630158760         | 51327528 | C | 0.25 | 0.3571 | A |
| 25 | BICF2G630158733         | 51338200 | G | 0    | 0      | A |
| 25 | BICF2G630158724         | 51348630 | A | 0.5  | 0.2143 | C |
| 25 | BICF2G630158721         | 51367772 | A | 0    | 0      | G |
| 25 | BICF2P142443            | 51377120 | G | 0.25 | 0.6429 | A |
| 25 | BICF2P215158            | 51384861 | A | 0    | 0      | G |
| 25 | BICF2G630158714         | 51394737 | C | 0.25 | 0.3571 | G |
| 25 | TIGRP2P334046_rs8955278 | 51412233 | A | 0.25 | 0.3    | G |
| 25 | BICF2P794275            | 51416705 | G | 0.25 | 0.3571 | A |
| 25 | BICF2P1470915           | 51428517 | C | 0.75 | 0.6429 | A |
| 25 | BICF2P178908            | 51443421 | A | 0.25 | 0.3571 | G |
| 25 | BICF2G630158688         | 51467013 | G | 1    | 0.7143 | A |
| 25 | BICF2G630158674         | 51474236 | G | 0.75 | 0.5714 | A |
| 25 | TIGRP2P334066_rs8930173 | 51492437 | G | 0.25 | 0.3333 | A |
| 25 | BICF2P1131500           | 51506991 | G | 0    | 0      | A |
| 25 | BICF2S23554142          | 51514253 | G | 0    | 0      | A |
| 25 | BICF2G630158597         | 51521260 | A | 0    | 0      | G |
| 25 | BICF2G630158571         | 51538789 | A | 0    | 0      | C |

|    |                         |          |   |      |        |   |
|----|-------------------------|----------|---|------|--------|---|
| 25 | BICF2G630158565         | 51543204 | C | 0.75 | 0.3571 | A |
| 25 | BICF2P1053017           | 51558321 | G | 0.75 | 0.3571 | A |
| 25 | BICF2P359772            | 51571202 | A | 0    | 0      | G |
| 25 | TIGRP2P334107_rs9126274 | 51586724 | A | 1    | 0.7    | G |
| 25 | BICF2P524994            | 51590666 | G | 0    | 0      | A |
| 25 | BICF2G630158541         | 51611884 | A | 0.25 | 0.1429 | G |
| 25 | BICF2G630158540         | 51616742 | G | 0.25 | 0.1429 | A |
| 25 | BICF2P792692            | 51634597 | A | 0    | 0.2857 | G |
| 25 | BICF2G630158525         | 51636110 | A | 0.75 | 0.5714 | G |
| 25 | BICF2P699478            | 51648615 | A | 0    | 0.2857 | G |
| 25 | BICF2G630158522         | 51662610 | G | 0    | 0.25   | A |
| 25 | BICF2G630158504         | 51674610 | A | 0.25 | 0.1429 | G |
| 25 | BICF2G630158483         | 51685116 | A | 0    | 0      | G |
| 25 | BICF2G630158470         | 51698518 | A | 0    | 0      | G |
| 25 | BICF2G630158455         | 51705853 | A | 1    | 0.5714 | G |
| 25 | BICF2P1042698           | 51723988 | G | 0.25 | 0.2857 | A |
| 25 | BICF2G630158443         | 51736966 | G | 0.75 | 0.7143 | A |
| 25 | BICF2S2338106           | 51740479 | A | 0.5  | 0.5714 | G |
| 25 | BICF2G630158436         | 51750128 | G | 0.25 | 0.3571 | A |
| 25 | BICF2G630158429         | 51766280 | A | 0.75 | 0.8571 | G |
| 25 | BICF2G630158426         | 51777960 | A | 0.25 | 0.1429 | G |
| 25 | BICF2G630158423         | 51789602 | A | 0.75 | 0.6429 | G |
| 25 | BICF2G630158419         | 51797389 | A | 0.25 | 0.3571 | G |
| 25 | BICF2G630158405         | 51808086 | A | 0.25 | 0.1429 | G |
| 25 | BICF2G630158395         | 51819999 | G | 0.5  | 0.4286 | A |
| 25 | BICF2G630158382         | 51838689 | A | 0.25 | 0.1429 | G |
| 25 | BICF2G630158364         | 51847036 | C | 0.5  | 0.3571 | A |
| 25 | BICF2S23329899          | 51856452 | A | 0    | 0.25   | G |
| 25 | BICF2S23623536          | 51868961 | G | 0.25 | 0.2857 | A |
| 25 | BICF2P1379690           | 51881621 | T | 0    | 0      | A |
| 25 | BICF2G630158334         | 51895992 | A | 0    | 0      | C |
| 25 | BICF2S23545266          | 51903111 | A | 0.25 | 0.3571 | G |
| 25 | BICF2G630158321         | 51921768 | G | 0.25 | 0.3571 | A |
| 25 | BICF2G630158297         | 51934503 | G | 0.5  | 0.5    | A |
| 25 | BICF2G630158281         | 51953948 | A | 0    | 0      | G |
| 25 | BICF2G630158260         | 51960145 | G | 0.25 | 0.2143 | A |
| 25 | BICF2G630158222         | 51969535 | G | 1    | 1      | A |
| 25 | BICF2G630158179         | 51984564 | A | 0    | 0      | G |
| 25 | BICF2G630158169         | 51988084 | A | 0    | 0      | G |
| 25 | BICF2S23710364          | 52002138 | A | 0    | 0      | G |
| 25 | BICF2P1050330           | 52012979 | G | 0.25 | 0.2143 | A |
| 25 | BICF2P1275768           | 52025005 | A | 0.25 | 0.3571 | G |
| 25 | BICF2P1470672           | 52026292 | C | 0.5  | 0.3333 | A |
| 25 | BICF2G630158140         | 52045571 | A | 0.25 | 0.2143 | G |
| 25 | BICF2S23437004          | 52052154 | A | 0    | 0      | G |
| 25 | BICF2P227258            | 52064233 | G | 0.75 | 0.7143 | A |
| 25 | BICF2G630158073         | 52078348 | A | 0.25 | 0.2857 | G |

|    |                         |          |   |      |        |   |
|----|-------------------------|----------|---|------|--------|---|
| 25 | BICF2P68742             | 52084818 | G | 0.25 | 0.3571 | A |
| 25 | BICF2G630158067         | 52085123 | A | 0.25 | 0.2857 | G |
| 25 | BICF2P374462            | 52098130 | G | 0.75 | 0.7143 | A |
| 25 | BICF2S23310582          | 52098499 | G | 0.75 | 0.7143 | A |
| 25 | BICF2G630158020         | 52108271 | C | 0.5  | 0.5    | A |
| 25 | BICF2G630158014         | 52129103 | G | 0    | 0      | A |
| 25 | BICF2G630158010         | 52130409 | A | 0    | 0      | G |
| 25 | BICF2P641672            | 52149930 | A | 0.5  | 0.5714 | C |
| 25 | BICF2G630158004         | 52155080 | A | 0    | 0      | G |
| 25 | BICF2P169461            | 52166034 | G | 0.5  | 0.5714 | A |
| 25 | BICF2S23323441          | 52185619 | A | 0.25 | 0.2857 | C |
| 25 | BICF2G630158002         | 52195333 | A | 0.25 | 0.25   | G |
| 25 | BICF2G630157993         | 52200513 | G | 0    | 0      | A |
| 25 | BICF2G630157961         | 52212949 | A | 0    | 0      | G |
| 25 | BICF2P266191            | 52223681 | G | 0.5  | 0.4286 | A |
| 25 | BICF2P15098             | 52240853 | G | 0.5  | 0.5    | A |
| 25 | TIGRP2P334283_rs9004451 | 52245072 | A | 0    | 0      | G |
| 25 | BICF2P866658            | 52258675 | A | 0.25 | 0.3571 | G |
| 25 | BICF2G630157937         | 52285112 | A | 0.5  | 0.4286 | G |
| 25 | BICF2P487539            | 52299497 | A | 0.25 | 0.1429 | G |
| 25 | BICF2G630157932         | 52305866 | A | 0    | 0      | G |
| 25 | BICF2G630157914         | 52315252 | A | 0    | 0      | G |
| 25 | BICF2G630157881         | 52327794 | C | 0    | 0      | G |
| 25 | BICF2G630157859         | 52339380 | G | 0    | 0      | A |
| 25 | BICF2G630157853         | 52349780 | A | 0.25 | 0.2857 | G |
| 25 | BICF2G630157843         | 52359817 | C | 0.25 | 0.2857 | A |
| 25 | BICF2G630157792         | 52377868 | A | 0    | 0      | G |
| 25 | BICF2G630157767         | 52386736 | A | 0.25 | 0.1429 | C |
| 25 | BICF2G630157699         | 52406429 | G | 0.25 | 0.2143 | A |
| 25 | TIGRP2P334366_rs8951868 | 52438727 | 0 | 0    | 0      | C |
| 25 | BICF2G630157614         | 52450818 | G | 0    | 0      | A |
| 25 | BICF2S23439582          | 52454560 | G | 0.5  | 0.4286 | A |
| 25 | BICF2G630157609         | 52465894 | G | 0.5  | 0.4286 | A |
| 25 | BICF2G630157584         | 52474738 | A | 0    | 0      | G |
| 25 | BICF2S23333050          | 52488269 | A | 0    | 0      | G |
| 25 | BICF2G630157550         | 52504563 | A | 0.5  | 0.5714 | G |
| 25 | BICF2G630157507         | 52514231 | G | 1    | 1      | A |
| 25 | BICF2G630157496         | 52524247 | A | 0.5  | 0.4286 | G |
| 25 | BICF2S2364910           | 52534517 | 0 | 0    | 0      | G |
| 25 | BICF2G630157473         | 52544152 | G | 0.25 | 0.2143 | A |
| 25 | BICF2P1352483           | 52556754 | A | 0.5  | 0.5714 | G |
| 25 | TIGRP2P334406_rs8870642 | 52573191 | A | 0.5  | 0.5    | G |
| 25 | BICF2G630157446         | 52580945 | A | 0.5  | 0.6429 | C |
| 25 | BICF2G630157396         | 52606358 | C | 0.25 | 0.2857 | A |
| 25 | BICF2G630157390         | 52613834 | A | 0.25 | 0.2857 | G |
| 25 | BICF2G630157361         | 52628502 | A | 0.25 | 0.2857 | G |
| 25 | BICF2P33920             | 52638056 | G | 0.25 | 0.3571 | A |

|    |                         |          |   |      |        |   |
|----|-------------------------|----------|---|------|--------|---|
| 25 | BICF2P658362            | 52651334 | 0 | 0    | 0      | C |
| 25 | BICF2S22938072          | 52664449 | G | 0.5  | 0.5    | A |
| 25 | BICF2G630157296         | 52671993 | A | 0.25 | 0.2857 | G |
| 25 | BICF2G630157275         | 52687657 | A | 0.25 | 0.3571 | G |
| 25 | TIGRP2P334470_rs8595849 | 52693808 | T | 0.25 | 0.1429 | A |
| 25 | BICF2G630157250         | 52715268 | A | 0.75 | 0.8571 | G |
| 25 | TIGRP2P334480_rs8632775 | 52725342 | 0 | 0    | 0      | G |
| 25 | BICF2P1224922           | 52729803 | A | 0.25 | 0.3571 | G |
| 25 | BICF2P892733            | 52746958 | A | 0.25 | 0.2857 | G |
| 25 | BICF2G630157160         | 52750750 | A | 0.25 | 0.2857 | G |
| 25 | BICF2G630157126         | 52768538 | 0 | 0    | 0      | C |
| 25 | TIGRP2P334503_rs8671612 | 52783157 | G | 0.5  | 0.5    | A |
| 25 | BICF2G630157115         | 52804631 | A | 0.75 | 0.8571 | C |
| 25 | BICF2G630157112         | 52811356 | G | 0.75 | 0.7143 | A |
| 25 | BICF2G630157090         | 52824671 | A | 0.5  | 0.5    | C |
| 25 | BICF2G630157026         | 52836674 | A | 0.5  | 0.5    | G |
| 25 | BICF2S2453773           | 52850716 | G | 0.5  | 0.5    | A |
| 25 | BICF2P936423            | 52857854 | C | 0    | 0      | A |
| 25 | BICF2G630156994         | 52870057 | G | 0    | 0      | A |
| 25 | BICF2G630156984         | 52877161 | G | 0    | 0      | C |
| 25 | BICF2P320436            | 52892856 | A | 0.25 | 0.2143 | G |
| 25 | BICF2P339066            | 52900465 | A | 0    | 0      | G |
| 25 | BICF2P185037            | 52915922 | A | 0.25 | 0.2857 | G |
| 25 | BICF2G630156983         | 52932663 | G | 0.25 | 0.1429 | C |
| 25 | BICF2G630156959         | 52945368 | A | 0.25 | 0.1667 | G |
| 25 | BICF2G630156938         | 52954773 | A | 0.5  | 0.3571 | C |
| 25 | BICF2G630156925         | 52963676 | 0 | 0    | 0      | G |
| 25 | BICF2P728985            | 52969108 | 0 | 0    | 0      | G |
| 25 | BICF2G630156882         | 52986429 | T | 0.25 | 0.2143 | A |
| 25 | BICF2G630156810         | 53023726 | A | 0.25 | 0.1429 | C |
| 25 | BICF2G630156805         | 53029989 | A | 0.5  | 0.5    | G |
| 25 | BICF2G630156798         | 53032742 | G | 0.5  | 0.5    | A |
| 25 | BICF2G630156778         | 53039501 | G | 0.25 | 0.1429 | A |
| 25 | BICF2P236596            | 53084444 | G | NA   | 0      | A |
| 25 | TIGRP2P334781_rs8519662 | 53098350 | A | 0    | 0      | G |
| 25 | BICF2S23028088          | 53132241 | T | 0.25 | 0.1429 | A |
| 25 | BICF2S23627577          | 53189291 | A | 0.5  | 0.6667 | G |
| 25 | BICF2P689448            | 53199531 | A | 0    | 0      | G |
| 25 | TIGRP2P335182_rs8881763 | 53211869 | G | 0.25 | 0.1429 | A |
| 25 | BICF2G630156592         | 53245259 | T | 0    | 0      | A |
| 25 | BICF2G630156534         | 53284533 | T | 0.25 | 0.1429 | A |
| 25 | TIGRP2P335296_rs9184577 | 53316505 | A | 0    | 0      | G |
| 25 | BICF2P1062573           | 53326759 | A | 0.5  | 0.4286 | C |
| 25 | TIGRP2P335336_rs9166663 | 53341295 | A | 0    | 0      | G |
| 25 | BICF2G630156403         | 53362398 | A | 0    | 0      | G |
| 25 | BICF2G630156379         | 53372100 | A | 0.25 | 0.3571 | G |
| 25 | BICF2G630156348         | 53394124 | G | 0.5  | 0.5714 | A |

|    |                         |          |   |      |        |   |
|----|-------------------------|----------|---|------|--------|---|
| 25 | BICF2G630156344         | 53404560 | C | 0.75 | 0.6429 | A |
| 25 | BICF2G630156336         | 53408655 | A | 0    | 0      | G |
| 25 | BICF2G630156315         | 53422853 | A | 0.75 | 0.7857 | G |
| 25 | BICF2G630156295         | 53433485 | A | 0.25 | 0.3571 | G |
| 25 | BICF2P746659            | 53448722 | G | 0    | 0      | A |
| 25 | TIGRP2P335383_rs8846475 | 53452821 | 0 | 0    | 0      | C |
| 25 | BICF2G630156214         | 53464454 | G | 0    | 0      | A |
| 25 | TIGRP2P335405_rs8957817 | 53480416 | G | 0.25 | 0.2143 | C |
| 25 | BICF2P475303            | 53491007 | G | 0.25 | 0.1429 | A |
| 25 | BICF2P433376            | 53505342 | A | 0.25 | 0.3571 | G |
| 25 | BICF2G630156146         | 53509782 | G | 0.5  | 0.6    | A |
| 25 | BICF2G630156137         | 53526456 | G | 0.25 | 0.1429 | A |
| 25 | BICF2G630156122         | 53535207 | A | 0.5  | 0.3571 | G |
| 25 | TIGRP2P335467_rs8714990 | 53549340 | G | 0.5  | 0.4286 | A |
| 25 | BICF2G630156087         | 53562877 | A | 0    | 0      | G |
| 25 | BICF2G630156082         | 53572679 | A | 0    | 0      | G |
| 25 | BICF2P785525            | 53587432 | A | 0.25 | 0.2857 | G |
| 25 | BICF2G630156064         | 53595338 | T | 0.25 | 0.2857 | A |
| 25 | TIGRP2P335488_rs9160199 | 53603278 | G | 0.5  | 0.5    | A |
| 25 | G1296f1S159             | 53620593 | G | 0.75 | 0.6429 | A |
| 25 | BICF2P608594            | 53725383 | A | 0    | 0      | G |
| 25 | BICF2G630156042         | 53734621 | G | 0.25 | 0.2857 | A |
| 25 | BICF2G630156022         | 53743706 | A | 0    | 0      | G |
| 25 | BICF2P420282            | 53757641 | G | 0    | 0      | A |
| 25 | BICF2G630155979         | 53769881 | A | 1    | 1      | G |
| 25 | BICF2P414404            | 53777439 | A | 0    | 0      | C |
| 25 | BICF2G630155973         | 53787466 | A | 0.25 | 0.1429 | G |
| 25 | BICF2S22964554          | 53798315 | 0 | 0    | 0      | G |
| 25 | BICF2G630190334         | 53813657 | A | 0.75 | 0.7857 | G |
| 25 | BICF2P222180            | 53827419 | A | 0    | 0      | G |
| 25 | BICF2S23239882          | 53834864 | A | 0.25 | 0.2857 | G |
| 25 | BICF2P280062            | 53851797 | 0 | 0    | 0      | G |
| 25 | G1298f12S301            | 53864622 | G | 0    | 0      | A |
| 25 | BICF2G630190314         | 53961218 | A | 0.25 | 0.1429 | G |
| 25 | TIGRP2P335585_rs8834443 | 53978426 | A | 0.5  | 0.75   | C |
| 25 | BICF2G630190299         | 53982775 | C | 0.25 | 0.1429 | A |
| 25 | BICF2P632502            | 53998379 | A | 0    | 0      | C |
| 25 | BICF2P1416795           | 54008469 | 0 | 0    | 0      | G |
| 25 | BICF2P315396            | 54026297 | 0 | 0    | 0      | A |
| 25 | BICF2P506646            | 54028642 | 0 | 0    | 0      | G |
| 25 | TIGRP2P335591_rs8813470 | 54042422 | 0 | 0    | 0      | G |
| 25 | BICF2S24510691          | 54052988 | 0 | 0    | 0      | G |
| 25 | BICF2S23346639          | 54069321 | A | 0    | 0      | G |
| 25 | BICF2G630190278         | 54082405 | C | 0.75 | 0.7143 | A |
| 25 | BICF2G630190277         | 54082423 | A | 0.75 | 0.7143 | G |
| 25 | BICF2S23026944          | 54089378 | G | 0    | 0      | A |
| 25 | BICF2S22928770          | 54107045 | G | 0    | 0      | A |

|    |                         |          |   |      |        |   |
|----|-------------------------|----------|---|------|--------|---|
| 25 | BICF2G630190264         | 54108363 | A | 0.25 | 0.2143 | C |
| 25 | BICF2G630190238         | 54152087 | A | 0    | 0      | G |
| 25 | BICF2G630190225         | 54164256 | A | 0    | 0      | T |
| 25 | BICF2S23646693          | 54176271 | 0 | 0    | 0      | A |
| 25 | BICF2S23243453          | 54183174 | G | 0    | 0      | A |
| 25 | BICF2P35219             | 54188835 | A | 0    | 0      | G |
| 25 | BICF2S23042459          | 54200339 | A | 0    | 0      | G |
| 25 | BICF2P129305            | 54212762 | A | NA   | 0.5    | G |
| 25 | BICF2P205110            | 54225325 | 0 | 0    | 0      | C |
| 25 | BICF2S23611052          | 54252562 | G | 0    | 0      | A |
| 25 | BICF2P641234            | 54268572 | 0 | 0    | 0      | G |
| 25 | BICF2G630190217         | 54284200 | A | 0    | 0      | G |
| 25 | BICF2G630190213         | 54294033 | G | 0    | 0      | A |
| 25 | BICF2S23027253          | 54312071 | 0 | 0    | 0      | A |
| 25 | BICF2G630190206         | 54318201 | A | 0.25 | 0.1429 | T |
| 25 | BICF2G630190200         | 54336187 | G | 0    | 0      | A |
| 25 | BICF2G630190192         | 54347632 | G | 0.25 | 0.2857 | A |
| 25 | BICF2S2344842           | 54350593 | A | 0    | 0      | G |
| 25 | BICF2G630190178         | 54361742 | A | 0    | 0      | G |
| 25 | BICF2P109722            | 54379146 | 0 | 0    | 0      | G |
| 25 | BICF2G630190170         | 54387652 | A | 0    | 0      | G |
| 25 | BICF2G630190161         | 54400945 | A | 0    | 0      | G |
| 25 | BICF2S2308736           | 54407635 | 0 | 0    | 0      | G |
| 25 | BICF2G630190133         | 54422288 | C | 0    | 0      | A |
| 25 | BICF2G630190129         | 54430934 | A | 0.5  | 0.5714 | G |
| 25 | BICF2G630190124         | 54442701 | A | 0.25 | 0.3571 | G |
| 25 | BICF2G630190109         | 54457171 | G | 0    | 0      | A |
| 25 | BICF2S23646552          | 54480896 | A | 0.5  | 0.4286 | C |
| 25 | BICF2P1441053           | 54487337 | 0 | 0    | 0      | A |
| 25 | BICF2G630190105         | 54499209 | G | 0    | 0      | A |
| 25 | BICF2P1398453           | 54515903 | A | 0.25 | 0.2857 | G |
| 25 | BICF2P174039            | 54528822 | G | 0.25 | 0.2857 | A |
| 25 | TIGRP2P335674_rs8989446 | 54541905 | G | 0.25 | 0.2857 | A |
| 25 | TIGRP2P335678_rs9203335 | 54551661 | A | 0.25 | 0.1667 | G |
| 25 | BICF2P1388787           | 54562819 | G | 0.5  | 0.5    | C |
| 28 | BICF2S23614906          | 3033619  | A | 0.5  | 0.1429 | G |
| 28 | BICF2P544998            | 3068834  | T | 0    | 0      | A |
| 28 | BICF2P1244415           | 3079808  | 0 | 0    | 0      | A |
| 28 | TIGRP2P358290_rs8524108 | 3103813  | 0 | 0    | 0      | A |
| 28 | G1342f17S144            | 3158125  | 0 | 0    | 0      | T |
| 28 | BICF2P451031            | 3179702  | A | 0    | 0      | C |
| 28 | BICF2P71402             | 3194405  | 0 | 0    | 0      | A |
| 28 | BICF2P1499889           | 3204921  | A | 0.5  | 0.8571 | G |
| 28 | BICF2P793827            | 3214603  | G | 0.5  | 0.8571 | A |
| 28 | BICF2S23717195          | 3222756  | G | 0.5  | 0.8571 | A |
| 28 | BICF2P1440475           | 3242701  | G | 0.5  | 0.8571 | A |
| 28 | BICF2P1440476           | 3242986  | G | 0.5  | 0.8571 | A |



|    |                         |         |   |      |        |   |
|----|-------------------------|---------|---|------|--------|---|
| 28 | BICF2P272619            | 3257083 | C | 0.5  | 0.8571 | A |
| 28 | BICF2S23220161          | 3286590 | A | 0.5  | 0.8571 | G |
| 28 | BICF2P1386794           | 3294732 | G | 0.5  | 0.8571 | A |
| 28 | BICF2P695104            | 3306666 | A | 0.5  | 0.8571 | G |
| 28 | BICF2P1457621           | 3312994 | A | 0.5  | 0.8571 | G |
| 28 | BICF2P612576            | 3331385 | 0 | 0    | 0      | A |
| 28 | BICF2P814256            | 3351718 | A | 0.5  | 0.8571 | G |
| 28 | BICF2P26097             | 3366214 | G | 0.5  | 0.8571 | A |
| 28 | BICF2P627831            | 3377137 | C | 0.5  | 0.8571 | A |
| 28 | BICF2P1150934           | 3392313 | A | 0.5  | 0.8571 | G |
| 28 | BICF2P10777             | 3416915 | A | 0.5  | 0.8571 | G |
| 28 | BICF2P374575            | 3437863 | A | 0    | 0      | T |
| 28 | BICF2P383815            | 3439214 | C | 0    | 0      | A |
| 28 | BICF2P916401            | 3459818 | A | 0.5  | 0.1429 | G |
| 28 | BICF2P129593            | 3465506 | 0 | 0    | 0      | G |
| 28 | BICF2P1305057           | 3477135 | A | 0    | 0      | G |
| 28 | BICF2P1251902           | 3486906 | A | 0.5  | 0.1429 | G |
| 28 | BICF2S23118800          | 3501267 | G | 0    | 0      | A |
| 28 | BICF2P799867            | 3509950 | A | 0.5  | 0.1429 | G |
| 28 | BICF2S2432001           | 3527069 | G | 0    | 0      | A |
| 28 | BICF2P924114            | 3553194 | 0 | 0    | 0      | A |
| 28 | BICF2S2342395           | 3570075 | G | 0    | 0      | A |
| 28 | BICF2P1080313           | 3580421 | G | 0    | 0      | A |
| 28 | BICF2P539313            | 3600620 | A | 0.25 | 0.2857 | G |
| 28 | BICF2P253187            | 3651417 | 0 | 0    | 0      | A |
| 28 | BICF2P926851            | 3682389 | A | 0    | 0      | G |
| 28 | TIGRP2P358324_rs8854385 | 3708627 | 0 | 0    | 0      | C |
| 28 | BICF2S23436596          | 3715875 | 0 | 0    | 0      | G |
| 28 | BICF2P798155            | 3737187 | 0 | 0    | 0      | A |
| 28 | BICF2S22960110          | 3738815 | G | 0.25 | 0.5714 | A |
| 28 | BICF2P449610            | 3757787 | 0 | 0    | 0      | A |
| 28 | BICF2P771292            | 3769454 | A | 0    | 0      | G |
| 28 | BICF2S24410948          | 3776049 | A | 0    | 0.2    | G |
| 28 | BICF2P1024657           | 3804097 | 0 | 0    | 0      | C |
| 28 | BICF2P1210342           | 3840535 | G | 0.5  | 0.1429 | A |
| 28 | BICF2P670006            | 3841528 | A | 0.5  | 0.1429 | G |
| 28 | BICF2P460494            | 3845052 | A | 0.5  | 0.1429 | G |
| 28 | BICF2P709391            | 3857218 | T | 0    | 0      | A |
| 28 | BICF2P709388            | 3857961 | A | 0.5  | 0.1429 | G |
| 28 | BICF2P1118806           | 3861042 | A | 0.5  | 0.1429 | G |
| 28 | BICF2P1464870           | 3869836 | A | 0.5  | 0.1429 | G |
| 28 | BICF2P580658            | 3878536 | A | 0    | 0      | G |
| 28 | BICF2P511034            | 3894379 | G | 0.5  | 0.1429 | A |
| 28 | BICF2P1032531           | 3910404 | A | 0    | 0      | G |
| 28 | BICF2P699768            | 3913693 | A | 0    | 0      | G |
| 28 | BICF2P218503            | 3929223 | A | 0    | 0      | G |
| 28 | BICF2S2361060           | 3948448 | G | 0.5  | 0.1429 | A |

|    |                         |         |   |      |         |   |
|----|-------------------------|---------|---|------|---------|---|
| 28 | BICF2P264159            | 3963774 | C | 0.5  | 0.1429  | A |
| 28 | BICF2P729695            | 3969347 | 0 | 0    | 0       | G |
| 28 | BICF2P392768            | 3988577 | A | 0    | 0       | G |
| 28 | BICF2P1278582           | 3994539 | A | 0.5  | 0.1429  | G |
| 28 | BICF2P53805             | 4007164 | G | 0    | 0       | A |
| 28 | BICF2S23648110          | 4023867 | A | 0.5  | 0.08333 | G |
| 28 | BICF2P776651            | 4033493 | A | 0.5  | 0.1429  | C |
| 28 | BICF2P578650            | 4038897 | A | 0.5  | 0.1429  | G |
| 28 | BICF2S23633809          | 4066134 | G | 0.5  | 0.1429  | A |
| 28 | BICF2P710517            | 4080052 | G | 0.25 | 0.5714  | A |
| 28 | BICF2P894832            | 4085047 | A | 0.75 | 0.4286  | G |
| 28 | BICF2P74336             | 4106759 | G | 0.75 | 0.4286  | A |
| 28 | BICF2P731304            | 4126345 | 0 | 0    | 0       | G |
| 28 | BICF2P424861            | 4130579 | A | 0.75 | 0.4286  | C |
| 28 | BICF2P442754            | 4147239 | G | 0.75 | 0.4286  | A |
| 28 | BICF2P1219975           | 4155288 | 0 | 0    | 0       | G |
| 28 | BICF2P1104036           | 4166539 | A | 0.75 | 0.4286  | G |
| 28 | BICF2P1187085           | 4175884 | G | 0.75 | 0.4286  | A |
| 28 | BICF2P1465873           | 4180174 | G | 0.75 | 0.4286  | A |
| 28 | BICF2P1461336           | 4189733 | G | 0.75 | 0.4286  | A |
| 28 | BICF2P1314889           | 4199059 | A | 0.25 | 0.2857  | C |
| 28 | BICF2P165008            | 4209198 | G | 0.5  | 0.8571  | A |
| 28 | BICF2P839323            | 4223697 | 0 | 0    | 0       | G |
| 28 | BICF2P1323033           | 4237473 | A | 0.75 | 0.7143  | G |
| 28 | BICF2P96089             | 4244272 | 0 | 0    | 0       | G |
| 28 | BICF2S23621342          | 4263503 | A | 0    | 0       | G |
| 28 | BICF2P1233682           | 4280088 | C | 0.25 | 0.25    | A |
| 28 | BICF2S23636555          | 4311892 | G | 0.25 | 0.5714  | A |
| 28 | BICF2S2319010           | 4317855 | A | 0.25 | 0.5714  | G |
| 28 | TIGRP2P358339_rs9214623 | 4346081 | 0 | 0    | 0       | G |
| 28 | BICF2P102964            | 4363645 | G | 0.5  | 0.1429  | A |
| 28 | BICF2P306217            | 4370641 | A | 0.25 | 0.2857  | T |
| 28 | BICF2S2342876           | 4413439 | 0 | 0    | 0       | G |
| 28 | BICF2S23544977          | 4422645 | A | 0.25 | 0.5714  | G |
| 28 | G1343f35S36             | 4441641 | 0 | 0    | 0       | C |
| 28 | BICF2P1151838           | 4462765 | 0 | 0    | 0       | A |
| 28 | BICF2P1274409           | 4479114 | C | 0.25 | 0.2857  | A |
| 28 | BICF2P481331            | 4487715 | G | 0.5  | 0.1429  | A |
| 28 | BICF2S2335126           | 4504108 | A | 0    | 0       | G |
| 28 | BICF2P1337546           | 4513816 | A | 0.5  | 0.1429  | G |
| 28 | BICF2P572249            | 4528486 | A | 0.5  | 0.1429  | G |
| 28 | BICF2P400798            | 4533790 | G | 0.5  | 0.8571  | A |
| 28 | BICF2S23040227          | 4549006 | A | 0    | 0       | G |
| 28 | BICF2P1078576           | 4562072 | A | 0.5  | 0.8571  | G |
| 28 | BICF2P1078575           | 4562192 | G | 0.5  | 0.1429  | A |
| 28 | BICF2S23356329          | 4576532 | A | 0.5  | 0.8571  | G |
| 28 | BICF2P1153854           | 4579584 | G | 0.5  | 0.8571  | A |

|    |                         |         |   |      |        |   |
|----|-------------------------|---------|---|------|--------|---|
| 28 | BICF2S23744476          | 4592821 | G | 0.5  | 0.1429 | A |
| 28 | BICF2P504501            | 4604529 | A | 0.5  | 0.8571 | G |
| 28 | BICF2P387817            | 4614624 | A | 0.5  | 0.8571 | G |
| 28 | BICF2P1375537           | 4647945 | A | 0.5  | 0.1429 | C |
| 28 | BICF2S2369417           | 4661572 | A | 0    | 0      | G |
| 28 | BICF2P366698            | 4672204 | G | 0.5  | 0.1429 | C |
| 28 | BICF2P417486            | 4689556 | A | 0.5  | 0.1429 | G |
| 28 | BICF2P119870            | 4699764 | G | 0.5  | 0.1429 | A |
| 28 | TIGRP2P358344_rs9006144 | 4704616 | 0 | 0    | 0      | G |
| 28 | BICF2P424179            | 4718566 | A | 0.5  | 0.8571 | G |
| 28 | BICF2P815625            | 4732573 | A | 0.5  | 0.8571 | G |
| 28 | BICF2P558927            | 4738433 | G | 0.5  | 0.1429 | A |
| 28 | BICF2P99519             | 4756956 | A | 0.5  | 0.8571 | G |
| 28 | BICF2P1132360           | 4763314 | A | 0.5  | 0.1429 | G |
| 28 | BICF2P792033            | 4781706 | G | 0.5  | 0.8571 | A |
| 28 | BICF2P1178062           | 4784842 | A | 0.5  | 0.1429 | G |
| 28 | BICF2P446632            | 4803599 | G | 0.5  | 0.1429 | A |
| 28 | BICF2P1368102           | 4811471 | A | 0.5  | 0.8571 | G |
| 28 | BICF2P1127539           | 4823045 | A | 0.5  | 0.8571 | G |
| 28 | TIGRP2P358347_rs8563518 | 4843051 | 0 | 0    | 0      | A |
| 28 | BICF2S23737042          | 4871231 | C | 0.75 | 0.4286 | A |
| 28 | BICF2S23014346          | 4878928 | A | 0.25 | 0.5714 | C |
| 28 | BICF2P844736            | 4891573 | 0 | 0    | 0      | A |
| 28 | BICF2S2328201           | 4907315 | A | 0    | 0      | G |
| 28 | BICF2P918464            | 4919822 | A | 0.25 | 0.2857 | C |
| 28 | BICF2P784917            | 4954136 | A | 0.25 | 0.2857 | G |
| 28 | BICF2S22933715          | 4982093 | G | 0    | 0      | A |
| 28 | BICF2P503524            | 5006985 | A | 0.5  | 0.1429 | G |
| 28 | BICF2P1129203           | 5014220 | G | 0.5  | 0.1429 | A |
| 28 | BICF2P1139061           | 5036188 | A | 0.5  | 0.1429 | C |
| 28 | BICF2P35734             | 5042112 | G | 0.5  | 0.1429 | A |
| 28 | BICF2P527424            | 5055351 | A | 0    | 0      | G |
| 28 | BICF2P818932            | 5067558 | G | 0.5  | 0.1429 | A |
| 28 | G1344f15S133            | 5102777 | 0 | 0    | 0      | C |
| 28 | BICF2P774664            | 5114399 | A | 0.5  | 0.1429 | G |
| 28 | BICF2P1511489           | 5119148 | 0 | 0    | 0      | G |
| 28 | BICF2P318050            | 5134816 | G | 0.5  | 0.1429 | A |
| 28 | BICF2P926821            | 5146855 | G | 0.5  | 0.1429 | A |
| 28 | BICF2S22955280          | 5160923 | G | 0.5  | 0.1429 | A |
| 28 | BICF2P451009            | 5165206 | G | 0.5  | 0.1429 | A |
| 28 | BICF2P1341915           | 5176116 | A | 0.25 | 0.2857 | G |
| 28 | BICF2P990393            | 5207734 | 0 | 0    | 0      | A |
| 28 | BICF2P901305            | 5218247 | 0 | 0    | 0      | G |
| 28 | BICF2P1206109           | 5223157 | 0 | 0    | 0      | C |
| 28 | BICF2P373293            | 5259362 | 0 | 0    | 0      | A |
| 28 | BICF2P1282048           | 5278412 | G | 0.5  | 0.8571 | A |
| 28 | BICF2P761816            | 5292416 | C | 0.5  | 0.8571 | G |

|    |                |         |   |      |         |   |
|----|----------------|---------|---|------|---------|---|
| 28 | BICF2P571407   | 5331323 | A | 0.5  | 0.8333  | G |
| 28 | BICF2P349836   | 5339885 | G | 0.5  | 0.1429  | A |
| 28 | BICF2P1066550  | 5353298 | G | 0.5  | 0.1429  | A |
| 28 | BICF2S23160996 | 5382423 | C | 0.5  | 0.08333 | A |
| 28 | BICF2P688188   | 5404915 | C | 0.5  | 0.8571  | G |
| 28 | BICF2S23651585 | 5429134 | G | 0.5  | 0.8571  | A |
| 28 | BICF2P473888   | 5444511 | G | 0.5  | 0.1429  | A |
| 28 | BICF2P1002411  | 5460237 | G | 0.5  | 0.8571  | A |
| 28 | BICF2P552237   | 5468380 | G | 0.25 | 0.2857  | A |
| 28 | BICF2P889996   | 5469333 | A | 0.25 | 0.25    | C |
| 28 | BICF2P669195   | 5504894 | A | 0.75 | 0.7143  | G |
| 28 | BICF2S23321683 | 5514443 | A | 0    | 0       | G |
| 28 | BICF2P461921   | 5522014 | A | 0.5  | 0.1429  | G |
| 28 | BICF2P932049   | 5531562 | C | 0.5  | 0.1429  | A |
| 28 | BICF2P810679   | 5544202 | A | 0.25 | 0.2857  | G |
| 28 | BICF2P1065458  | 5556888 | G | 0.5  | 0.1429  | A |
| 28 | BICF2P621227   | 5573182 | 0 | 0    | 0       | A |
| 28 | BICF2S232797   | 5580371 | 0 | 0    | 0       | G |
| 28 | BICF2S22941191 | 5590457 | 0 | 0    | 0       | G |
| 28 | BICF2S23219668 | 5601078 | A | 0    | 0       | G |
| 28 | BICF2P63945    | 5621318 | A | 0.5  | 0.1429  | T |
| 28 | BICF2S23025224 | 5627161 | A | 1    | 1       | G |
| 28 | BICF2P1099559  | 5637548 | A | 0.25 | 0.2857  | G |
| 28 | BICF2P589424   | 5658278 | 0 | 0    | 0       | A |
| 28 | BICF2S23658197 | 5677682 | T | 0    | 0       | A |
| 28 | BICF2S2351445  | 5684339 | G | 0.25 | 0.5714  | A |
| 28 | BICF2P1364604  | 5709337 | A | 0.5  | 0.8571  | G |
| 28 | BICF2P1227348  | 5712848 | A | 0.5  | 0.1429  | G |
| 28 | BICF2P1227350  | 5714819 | A | 0.5  | 0.1429  | G |
| 28 | BICF2S2367368  | 5716366 | A | 0    | 0       | G |
| 28 | BICF2P767603   | 5727850 | G | 0.5  | 0.8571  | A |
| 28 | BICF2P657531   | 5738761 | A | 0.5  | 0.8571  | G |
| 28 | BICF2P874372   | 5750465 | G | 0.5  | 0.1429  | A |
| 28 | BICF2P870957   | 5771196 | A | 0.75 | 0.7143  | C |
| 28 | BICF2P945061   | 5776735 | A | 0.75 | 0.7143  | G |
| 28 | BICF2P524439   | 5782674 | G | 0.75 | 0.7143  | A |
| 28 | BICF2P1172799  | 5786322 | G | 0.25 | 0.2857  | A |
| 28 | BICF2P107107   | 5811228 | A | 1    | 1       | G |
| 28 | BICF2P565529   | 5815036 | A | 0.75 | 0.7143  | G |
| 28 | BICF2P1181176  | 5819034 | G | 0.75 | 0.7143  | A |
| 28 | BICF2P1040666  | 5830829 | A | 0.25 | 0.2857  | G |
| 28 | BICF2P142299   | 5842028 | A | 0    | 0       | G |
| 28 | BICF2P1326153  | 5859861 | 0 | 0    | 0       | A |
| 28 | BICF2P1090475  | 5879096 | A | 0    | 0       | T |
| 28 | BICF2P112466   | 5881543 | A | 0.5  | 0.1429  | C |
| 28 | BICF2S23638184 | 5888665 | G | 0    | 0       | A |
| 28 | BICF2S23058187 | 5903223 | G | 0    | 0       | A |

|    |                         |         |   |      |        |   |
|----|-------------------------|---------|---|------|--------|---|
| 28 | BICF2P1361091           | 5927099 | A | 0.25 | 0.2857 | G |
| 28 | BICF2S23727346          | 5952180 | A | 0.5  | 0.8571 | C |
| 28 | BICF2S23713033          | 5962012 | 0 | 0    | 0      | C |
| 28 | BICF2S23024689          | 5977092 | 0 | 0    | NA     | A |
| 28 | BICF2S2344552           | 5982757 | A | 0.75 | 0.4286 | G |
| 28 | BICF2S2362012           | 6000990 | G | 0.75 | 0.4286 | A |
| 28 | BICF2G630277718         | 6031631 | G | 0.25 | 0.5714 | A |
| 28 | BICF2G630277681         | 6047583 | A | 0    | 0      | G |
| 28 | BICF2G630277680         | 6048014 | A | 0.75 | 0.4286 | G |
| 28 | BICF2G630277670         | 6052349 | A | 0.75 | 0.4286 | G |
| 28 | BICF2G630277642         | 6063443 | A | 1    | 1      | G |
| 28 | BICF2G630277594         | 6078699 | A | 1    | 1      | C |
| 28 | BICF2G630277589         | 6084318 | A | 1    | 1      | G |
| 28 | BICF2S23453548          | 6099330 | C | 0.75 | 0.4286 | A |
| 28 | BICF2P467990            | 6101258 | A | 0.25 | 0.5714 | G |
| 28 | BICF2P199151            | 6108639 | A | 0.75 | 0.7143 | G |
| 28 | BICF2S23253647          | 6119144 | A | 0.75 | 0.4286 | G |
| 28 | BICF2G630277565         | 6138064 | A | 0    | 0      | C |
| 28 | BICF2G630277558         | 6142228 | A | 0    | 0      | G |
| 28 | BICF2G630277521         | 6157846 | G | 0.75 | 0.7143 | A |
| 28 | BICF2G630277513         | 6167702 | G | 0.5  | 0.1429 | A |
| 28 | BICF2G630277500         | 6176378 | A | 0.5  | 0.1429 | G |
| 28 | BICF2G630277485         | 6187944 | A | 0.5  | 0.1429 | G |
| 28 | BICF2G630277482         | 6199394 | A | 0.5  | 0.1429 | G |
| 28 | BICF2G630277461         | 6210913 | A | 0.5  | 0.1429 | G |
| 28 | BICF2G630277446         | 6222683 | G | 0.5  | 0.1429 | A |
| 28 | BICF2G630277433         | 6227621 | G | 0.5  | 0.1429 | A |
| 28 | BICF2G630277432         | 6227711 | A | 0.5  | 0.1429 | G |
| 28 | BICF2G630277431         | 6227740 | G | 0.5  | 0.1429 | A |
| 28 | BICF2G630277408         | 6236916 | G | 0.5  | 0.1429 | A |
| 28 | BICF2G630277384         | 6247033 | G | 0.5  | 0.1429 | A |
| 28 | BICF2P100443            | 6259198 | G | NA   | 0      | C |
| 28 | BICF2G630277356         | 6273213 | A | 0    | 0      | G |
| 28 | TIGRP2P363156_rs9223160 | 6283675 | 0 | 0    | 0      | G |
| 28 | BICF2G630277321         | 6292688 | A | 0.75 | 0.7143 | G |
| 28 | BICF2G630277308         | 6299523 | C | 0.75 | 0.7143 | A |
| 28 | BICF2G630277302         | 6304832 | A | 0    | 0      | G |
| 28 | BICF2P361383            | 6315023 | G | 1    | 1      | A |
| 28 | BICF2G630277280         | 6335926 | G | 0    | 0      | A |
| 28 | BICF2G630277279         | 6336695 | A | 0    | 0      | G |
| 28 | BICF2G630277247         | 6353309 | C | 0.5  | 0.8571 | A |
| 28 | BICF2S2328536           | 6358997 | G | 1    | 1      | A |
| 28 | BICF2G630277239         | 6361912 | A | 0.5  | 0.1429 | G |
| 28 | BICF2G630277213         | 6375853 | A | 0.5  | 0.1429 | G |
| 28 | BICF2G630277203         | 6382848 | A | 0.75 | 0.4286 | C |
| 28 | BICF2G630277185         | 6402784 | A | 0.5  | 0.1429 | C |
| 28 | BICF2P1148355           | 6423588 | A | 0    | 0      | G |

|    |                         |         |   |      |        |   |
|----|-------------------------|---------|---|------|--------|---|
| 28 | BICF2G630277166         | 6440320 | A | 0.5  | 0.1429 | G |
| 28 | BICF2G630277160         | 6455853 | A | 0.5  | 0.1429 | G |
| 28 | BICF2G630277154         | 6465813 | A | 0    | 0      | G |
| 28 | BICF2S236455            | 6480454 | A | 0    | 0      | G |
| 28 | BICF2G630277144         | 6481798 | A | 0    | 0      | G |
| 28 | BICF2S23541984          | 6508677 | C | 0.5  | 0.1429 | A |
| 28 | BICF2S23544258          | 6512515 | G | 0    | 0      | A |
| 28 | BICF2G630277127         | 6521398 | A | 0    | 0      | G |
| 28 | BICF2G630277115         | 6536693 | A | 0.5  | 0.8571 | G |
| 28 | BICF2G630277103         | 6552823 | G | 0    | 0      | A |
| 28 | BICF2G630277099         | 6557636 | A | 0    | 0      | G |
| 28 | BICF2G630277085         | 6573981 | G | 0    | 0      | A |
| 28 | BICF2G630277075         | 6589435 | A | 0    | 0      | G |
| 28 | BICF2S23530884          | 6611497 | A | 0.5  | 0.1429 | G |
| 28 | BICF2P540967            | 6620583 | 0 | 0    | 0      | A |
| 28 | BICF2P362153            | 6632340 | 0 | 0    | 0      | C |
| 28 | BICF2G630277066         | 6636224 | G | 0.25 | 0.5714 | A |
| 28 | BICF2G630277063         | 6687005 | A | 0    | 0      | C |
| 28 | BICF2P1334359           | 6695692 | C | 0    | 0      | A |
| 28 | BICF2P1322828           | 6717707 | A | 0    | 0      | G |
| 28 | BICF2S23018092          | 6756412 | 0 | 0    | 0      | G |
| 28 | TIGRP2P363159_rs8612872 | 6785113 | 0 | 0    | 0      | C |
| 28 | BICF2G630277054         | 6796970 | G | 0.5  | 0.1429 | A |
| 28 | BICF2G630277042         | 6827761 | A | 0.5  | 0.1429 | G |
| 28 | BICF2G630277039         | 6833973 | G | 1    | 1      | A |
| 28 | BICF2G630277038         | 6844092 | A | 0    | 0      | G |
| 28 | BICF2S2336694           | 6862028 | A | 0    | 0      | G |
| 28 | G1346f30S356            | 6883013 | 0 | 0    | 0      | C |
| 28 | BICF2S23641981          | 6907355 | G | 1    | 1      | A |
| 28 | BICF2G630277035         | 6930561 | 0 | 0    | 0      | G |
| 28 | BICF2G630277033         | 6949367 | A | 0    | 0      | G |
| 28 | BICF2P643145            | 6977143 | 0 | 0    | 0      | T |
| 28 | G1347f42S302            | 7014296 | G | 0.5  | 0.8571 | A |
| 28 | G1347f45S249            | 7016100 | 0 | 0    | 0      | C |
| 28 | BICF2G630277015         | 7047615 | A | 0.5  | 0.8571 | G |
| 28 | BICF2P647429            | 7055901 | G | 0.5  | 0.8571 | A |
| 28 | BICF2G630276998         | 7057731 | G | 0.5  | 0.8571 | A |
| 28 | BICF2G630276987         | 7064507 | A | 1    | 1      | G |
| 28 | BICF2G630276981         | 7066414 | A | 0    | 0      | G |
| 28 | BICF2G630276972         | 7067533 | G | 0    | 0      | A |
| 28 | BICF2G630276967         | 7068117 | A | 0    | 0      | G |
| 28 | BICF2G630276940         | 7081365 | A | 0.5  | 0.8571 | C |
| 28 | BICF2G630276930         | 7085119 | G | 0.5  | 0.8571 | A |
| 28 | BICF2P1397359           | 7095537 | G | 0.5  | 0.1429 | A |
| 28 | BICF2P1351216           | 7117416 | A | 1    | 1      | C |
| 28 | BICF2P932953            | 7127346 | A | 0    | 0      | G |
| 28 | BICF2P705465            | 7131345 | C | 0    | 0      | A |

|    |                         |         |   |     |        |   |
|----|-------------------------|---------|---|-----|--------|---|
| 28 | BICF2P623170            | 7149466 | A | 0   | 0      | G |
| 28 | BICF2P126115            | 7156463 | C | 0   | 0      | A |
| 28 | BICF2S2339484           | 7173101 | G | 0   | 0      | A |
| 28 | BICF2P1421057           | 7176612 | A | 0   | 0      | G |
| 28 | BICF2P642381            | 7189430 | G | 0   | 0      | A |
| 28 | BICF2P1024838           | 7212046 | A | 0   | 0      | C |
| 28 | BICF2P923826            | 7244367 | A | 0   | 0      | G |
| 28 | BICF2P923819            | 7245549 | A | 0   | 0      | C |
| 28 | BICF2P331374            | 7264773 | G | 0   | 0      | A |
| 28 | BICF2S23241689          | 7272505 | C | 0   | 0      | A |
| 28 | BICF2S23337831          | 7280822 | A | 0   | 0      | G |
| 28 | BICF2S23348852          | 7294852 | A | 0   | 0      | G |
| 28 | BICF2P1306278           | 7306061 | A | 0   | 0      | G |
| 28 | BICF2P14144             | 7324940 | A | 0   | 0      | G |
| 28 | BICF2P586607            | 7335084 | A | 0   | 0      | G |
| 28 | BICF2P154667            | 7342502 | A | 0   | 0      | G |
| 28 | BICF2P751524            | 7360497 | 0 | 0   | 0      | A |
| 28 | BICF2P450501            | 7411914 | A | 0   | 0      | G |
| 28 | BICF2S22954052          | 7424402 | A | 0   | 0      | C |
| 28 | BICF2S23414401          | 7444309 | A | 0   | 0      | G |
| 28 | BICF2P489426            | 7457527 | G | 0   | 0      | A |
| 28 | BICF2P881792            | 7477731 | 0 | 0   | 0      | A |
| 28 | BICF2P342491            | 7497309 | G | 0.5 | 0.8571 | A |
| 28 | BICF2P1172850           | 7499683 | A | 0   | 0      | G |
| 28 | BICF2S2354077           | 7513333 | G | 0.5 | 0.1429 | A |
| 28 | BICF2P253100            | 7523804 | A | 1   | 1      | G |
| 28 | BICF2P1213842           | 7534964 | G | 0   | 0      | A |
| 28 | G1348f23S120            | 7561391 | G | 0   | 0      | A |
| 28 | BICF2S23039509          | 7585910 | G | 0.5 | 0.1429 | A |
| 28 | BICF2S23530822          | 7596805 | G | 0.5 | 0.1429 | A |
| 28 | BICF2P284343            | 7608394 | 0 | 0   | 0      | A |
| 28 | BICF2S2359853           | 7645254 | A | 0.5 | 0.1429 | G |
| 28 | BICF2P994547            | 7672445 | 0 | 0   | 0      | G |
| 28 | BICF2P684729            | 7709015 | A | 0   | 0      | C |
| 28 | BICF2S2305020           | 7719288 | A | 0   | 0      | G |
| 28 | BICF2P186609            | 7736381 | A | 0   | 0      | G |
| 28 | BICF2S23025210          | 7754765 | A | 0   | 0      | T |
| 28 | BICF2P964044            | 7778907 | G | 0.5 | 0.8571 | A |
| 28 | BICF2P214298            | 7786608 | A | 0   | 0      | G |
| 28 | BICF2P974113            | 7801145 | 0 | 0   | 0      | G |
| 28 | BICF2S2328221           | 7820914 | A | 0.5 | 0.8571 | G |
| 28 | BICF2P607948            | 7843654 | 0 | 0   | 0      | C |
| 28 | BICF2P208737            | 7873939 | 0 | 0   | 0      | A |
| 28 | BICF2S2295535           | 7880748 | A | 0.5 | 0.1429 | G |
| 28 | BICF2S22962017          | 7897570 | A | 0   | 0      | G |
| 28 | TIGRP2P363188_rs8950082 | 7913353 | 0 | 0   | 0      | G |
| 28 | BICF2S23048769          | 7924563 | A | 0.5 | 0.1429 | G |

|    |                         |         |   |     |        |   |
|----|-------------------------|---------|---|-----|--------|---|
| 28 | BICF2P518514            | 7938612 | G | 0   | 0      | A |
| 28 | BICF2P1181274           | 7948652 | A | 0.5 | 0.1429 | G |
| 28 | BICF2S23640630          | 7972858 | G | 0.5 | 0.1429 | A |
| 28 | BICF2S239617            | 7987231 | 0 | 0   | 0      | G |
| 28 | BICF2P704249            | 7998063 | 0 | 0   | 0      | A |
| 28 | G1349f29S194            | 8027418 | G | 0.5 | 0.1429 | A |
| 28 | G1350f40S147            | 8081294 | G | 0   | 0      | A |
| 28 | TIGRP2P363197_rs8610906 | 8089687 | 0 | 0   | 0      | C |
| 28 | BICF2S23139838          | 8105793 | A | 0   | 0      | G |
| 28 | BICF2P294261            | 8108475 | 0 | 0   | 0      | A |
| 28 | BICF2S23253066          | 8123344 | A | 0   | 0      | G |
| 28 | BICF2S23019222          | 8138925 | G | 0   | 0      | A |
| 28 | BICF2S23058214          | 8148713 | A | 0   | 0      | G |
| 28 | BICF2P146098            | 8157584 | G | 0   | 0      | A |
| 28 | BICF2P106533            | 8166348 | A | 0   | 0      | G |
| 28 | BICF2P547974            | 8176819 | A | 0   | 0      | G |
| 28 | BICF2P462239            | 8188910 | G | 0   | 0      | A |
| 28 | BICF2P900602            | 8201647 | G | 0   | 0      | A |
| 28 | BICF2S23639764          | 8214068 | G | 0.5 | 0.1429 | A |
| 28 | BICF2P1088263           | 8224991 | G | 0.5 | 0.1429 | A |
| 28 | BICF2P1324060           | 8242969 | A | 0   | 0      | G |
| 28 | BICF2S23058600          | 8261862 | G | 0.5 | 0.1429 | A |
| 28 | BICF2P1026077           | 8277599 | G | 0.5 | 0.1429 | A |
| 28 | BICF2P208976            | 8280690 | A | 0.5 | 0.8571 | G |
| 28 | BICF2P741064            | 8291874 | A | 0   | 0      | G |
| 28 | BICF2S23446608          | 8305258 | A | 0   | 0      | C |
| 28 | BICF2P919147            | 8315136 | A | 0   | 0      | G |
| 28 | BICF2P1499895           | 8346619 | C | 0.5 | 0.1429 | A |
| 28 | BICF2P856791            | 8351601 | G | 0   | 0      | A |
| 28 | BICF2S23253571          | 8369886 | G | 0.5 | 0.1429 | A |
| 28 | BICF2P767804            | 8376174 | A | 0.5 | 0.1429 | G |
| 28 | BICF2S23023237          | 8386126 | A | 0.5 | 0.1429 | C |
| 28 | BICF2S23731618          | 8402913 | C | 0.5 | 0.1429 | A |
| 28 | BICF2S23037883          | 8409784 | C | 0.5 | 0.1429 | A |
| 28 | BICF2S23744717          | 8437505 | G | 0.5 | 0.1429 | A |
| 28 | BICF2S22931948          | 8459089 | C | 0.5 | 0.1429 | A |
| 28 | BICF2S2292019           | 8464563 | T | 0.5 | 0.1429 | A |
| 28 | BICF2P129694            | 8477997 | A | 0.5 | 0.1429 | G |
| 28 | BICF2P725547            | 8496256 | A | 0.5 | 0.1429 | G |
| 28 | BICF2P535710            | 8500186 | G | 0.5 | 0.1429 | A |
| 28 | BICF2P1272534           | 8521124 | A | 0.5 | 0.1429 | G |
| 28 | BICF2P844831            | 8524723 | G | 0.5 | 0.1429 | A |
| 28 | BICF2S23545635          | 8535865 | G | 0.5 | 0.8571 | A |
| 28 | BICF2P1009737           | 8562122 | 0 | 0   | 0      | A |
| 28 | BICF2S23020071          | 8577958 | A | 1   | 1      | G |
| 28 | BICF2S23025022          | 8610870 | G | 1   | 1      | A |
| 28 | BICF2S23522466          | 8631079 | A | 1   | 1      | G |



|    |                         |         |   |     |        |   |
|----|-------------------------|---------|---|-----|--------|---|
| 28 | BICF2P545419            | 8644964 | C | 1   | 1      | A |
| 28 | BICF2P811948            | 8653884 | A | 1   | 1      | G |
| 28 | BICF2S23634656          | 8667687 | A | 0   | 0      | G |
| 28 | BICF2S23029130          | 8674609 | 0 | 0   | 0      | A |
| 28 | BICF2P131445            | 8696051 | 0 | 0   | 0      | A |
| 28 | BICF2P524818            | 8722423 | 0 | 0   | 0      | A |
| 28 | G1351f39S240            | 8745885 | A | 0   | 0      | C |
| 28 | BICF2S24117415          | 8759434 | A | 0   | 0      | C |
| 28 | BICF2P643680            | 8790396 | 0 | 0   | 0      | A |
| 28 | BICF2P1223882           | 8803867 | 0 | 0   | 0      | A |
| 28 | BICF2S2459246           | 8832380 | A | 0.5 | 0.8571 | G |
| 28 | G1352f50S276            | 8848571 | A | 0   | 0      | G |
| 28 | BICF2P235045            | 8877986 | 0 | 0   | 0      | A |
| 28 | BICF2P449823            | 8881343 | 0 | 0   | 0      | A |
| 28 | BICF2P135497            | 8922338 | A | 0.5 | 0.8571 | G |
| 28 | BICF2P1361697           | 8927248 | A | 0.5 | 0.8571 | G |
| 28 | BICF2P308802            | 8958426 | 0 | 0   | 0      | G |
| 28 | BICF2P1438026           | 8959701 | 0 | 0   | 0      | G |
| 28 | BICF2S23711428          | 8981432 | C | 0   | 0      | A |
| 28 | TIGRP2P363212_rs8542123 | 9002198 | 0 | 0   | 0      | A |
| 28 | BICF2P226821            | 9011954 | G | 0   | 0      | A |
| 28 | BICF2P368521            | 9019303 | A | 0   | 0      | G |
| 28 | BICF2P1231191           | 9028986 | A | 0   | 0      | G |
| 28 | BICF2P872816            | 9043143 | A | 0   | 0      | G |
| 28 | BICF2P801398            | 9052695 | A | 0   | 0      | G |
| 28 | BICF2P861063            | 9063657 | A | 0   | 0      | G |
| 28 | BICF2P1517440           | 9081673 | 0 | 0   | 0      | G |
| 28 | BICF2P1512414           | 9086853 | G | 0   | 0      | A |
| 28 | BICF2P647665            | 9098096 | C | 0   | 0      | A |
| 28 | BICF2S23610056          | 9101550 | G | 0   | 0      | A |
| 28 | BICF2S23534925          | 9118709 | A | 0   | 0      | C |
| 28 | BICF2P995482            | 9119654 | A | 0   | 0      | C |
| 28 | BICF2P1352403           | 9134897 | A | 0   | 0      | G |
| 28 | TIGRP2P363214_rs9101384 | 9146495 | 0 | 0   | 0      | G |
| 28 | BICF2P1461043           | 9164455 | A | 0   | 0      | G |
| 28 | BICF2P1265669           | 9188044 | C | 1   | 1      | A |
| 28 | BICF2P251629            | 9199743 | G | 0   | 0      | A |
| 28 | BICF2P354791            | 9216320 | C | 0   | 0      | A |
| 28 | BICF2S23633249          | 9249174 | 0 | 0   | 0      | A |
| 28 | BICF2S23150193          | 9267232 | A | 0   | 0      | C |
| 28 | BICF2P1204205           | 9296378 | A | 0   | 0      | G |
| 28 | BICF2P433481            | 9308141 | A | 0   | 0      | G |
| 28 | BICF2P971747            | 9316343 | A | 0   | 0      | G |
| 28 | BICF2P1243196           | 9338227 | A | 0   | 0      | C |
| 28 | BICF2P1318537           | 9354396 | 0 | 0   | 0      | C |
| 28 | BICF2P68505             | 9362830 | A | 0   | 0      | C |
| 28 | BICF2S23019541          | 9397617 | G | 0   | 0      | A |

|    |                         |          |   |   |   |   |
|----|-------------------------|----------|---|---|---|---|
| 28 | BICF2P667369            | 9416193  | 0 | 0 | 0 | G |
| 28 | G1353f60S258            | 9459394  | G | 0 | 0 | A |
| 28 | BICF2P727415            | 9490716  | 0 | 0 | 0 | C |
| 28 | BICF2P916414            | 9506883  | 0 | 0 | 0 | A |
| 28 | G1354f67S107            | 9545771  | 0 | 0 | 0 | C |
| 28 | BICF2P437059            | 9583976  | 0 | 0 | 0 | G |
| 28 | BICF2G630276915         | 9621504  | A | 0 | 0 | G |
| 28 | BICF2G630276907         | 9655287  | G | 0 | 0 | A |
| 28 | BICF2P18496             | 9671491  | 0 | 0 | 0 | G |
| 28 | BICF2P396317            | 9693710  | 0 | 0 | 0 | G |
| 28 | BICF2G630276901         | 9702513  | A | 0 | 0 | G |
| 28 | BICF2G630276897         | 9716238  | A | 0 | 0 | G |
| 28 | BICF2P1389590           | 9738086  | 0 | 0 | 0 | A |
| 28 | BICF2G630276888         | 9752883  | A | 1 | 1 | C |
| 28 | BICF2G630276885         | 9767363  | C | 0 | 0 | A |
| 28 | BICF2S23554656          | 9802482  | A | 1 | 1 | G |
| 28 | G1355f49S150            | 9851792  | G | 1 | 1 | A |
| 28 | BICF2P250833            | 9882493  | 0 | 0 | 0 | A |
| 28 | BICF2P875612            | 9920962  | 0 | 0 | 0 | A |
| 28 | BICF2S23212775          | 9934842  | A | 0 | 0 | G |
| 28 | BICF2G630276874         | 9968478  | A | 1 | 1 | C |
| 28 | BICF2P247395            | 9980217  | G | 0 | 0 | A |
| 28 | BICF2G630276868         | 9985656  | G | 0 | 0 | A |
| 28 | BICF2G630276857         | 10008941 | A | 0 | 0 | G |
| 28 | BICF2G630276856         | 10017966 | C | 0 | 0 | A |
| 28 | BICF2G630276846         | 10031244 | A | 1 | 1 | G |
| 28 | BICF2G630276838         | 10054000 | A | 1 | 1 | C |
| 28 | G1356f28S358            | 10084716 | 0 | 0 | 0 | G |
| 28 | BICF2G630276834         | 10105500 | A | 0 | 0 | G |
| 28 | BICF2P791406            | 10145489 | 0 | 0 | 0 | A |
| 28 | BICF2P242157            | 10180868 | 0 | 0 | 0 | C |
| 28 | TIGRP2P358356_rs8878677 | 10191220 | 0 | 0 | 0 | A |
| 28 | BICF2S2414419           | 10217839 | G | 0 | 0 | A |
| 28 | BICF2G630276830         | 10270421 | G | 0 | 0 | A |
| 28 | BICF2S23720322          | 10301642 | C | 1 | 1 | A |
| 28 | BICF2P1378503           | 10346705 | A | 1 | 1 | G |
| 28 | TIGRP2P358366_rs8676670 | 10350385 | 0 | 0 | 0 | G |
| 28 | BICF2P1328646           | 10372082 | 0 | 0 | 0 | A |
| 28 | BICF2P1198367           | 10388500 | C | 0 | 0 | G |
| 28 | BICF2P831535            | 10398310 | 0 | 0 | 0 | A |
| 28 | BICF2P647493            | 10424064 | A | 0 | 0 | G |
| 28 | BICF2G630276818         | 10441404 | A | 0 | 0 | G |
| 28 | BICF2G630276816         | 10446730 | G | 0 | 0 | A |
| 28 | BICF2P924326            | 10454461 | A | 1 | 1 | G |
| 28 | BICF2G630276805         | 10467989 | G | 0 | 0 | A |
| 28 | BICF2G630276788         | 10483686 | A | 0 | 0 | G |
| 28 | BICF2G630276784         | 10493223 | G | 0 | 0 | A |

|    |                         |          |   |      |        |   |
|----|-------------------------|----------|---|------|--------|---|
| 28 | BICF2P1419832           | 10506084 | A | 0    | 0      | G |
| 28 | BICF2P122331            | 10526454 | 0 | 0    | 0      | G |
| 28 | BICF2P1507238           | 10560753 | 0 | 0    | 0      | G |
| 28 | TIGRP2P358368_rs9055303 | 10576761 | 0 | 0    | 0      | G |
| 28 | BICF2P1236478           | 10583870 | A | 0    | 0      | C |
| 28 | BICF2S23512426          | 10601728 | G | 0    | 0      | A |
| 28 | BICF2P1036636           | 10606562 | 0 | 0    | 0      | G |
| 28 | BICF2P1243444           | 10620031 | 0 | 0    | 0      | G |
| 28 | BICF2S23721327          | 10626218 | A | 0    | 0      | G |
| 28 | BICF2P157245            | 10644883 | 0 | 0    | 0      | A |
| 28 | BICF2S2445316           | 10664484 | G | 1    | 1      | A |
| 28 | TIGRP2P358370_rs8852096 | 10676174 | 0 | 0    | 0      | G |
| 28 | BICF2P38710             | 10690872 | 0 | 0    | 0      | G |
| 28 | BICF2S239347            | 10699696 | 0 | 0    | 0      | A |
| 28 | BICF2S23614176          | 10713203 | 0 | 0    | 0      | A |
| 28 | BICF2G630276750         | 10728062 | G | 0    | 0      | A |
| 28 | BICF2G630276743         | 10731718 | G | 0    | 0      | A |
| 28 | BICF2S23352923          | 10751868 | A | 0    | 0      | G |
| 28 | TIGRP2P358372_rs9066003 | 10762018 | 0 | 0    | 0      | A |
| 28 | BICF2S23324624          | 10768236 | G | 0    | 0      | A |
| 28 | BICF2P491731            | 10789215 | 0 | 0    | 0      | C |
| 28 | BICF2P80899             | 10802499 | 0 | 0    | 0      | G |
| 28 | BICF2P485460            | 10814405 | 0 | 0    | 0      | C |
| 28 | BICF2G630276733         | 10829836 | A | 1    | 1      | G |
| 28 | BICF2S2454506           | 10836489 | A | 0    | 0      | T |
| 28 | BICF2P777005            | 10852987 | 0 | 0    | 0      | A |
| 28 | BICF2S23555051          | 10859339 | A | 0    | 0      | G |
| 28 | BICF2P878074            | 10867526 | A | 0.75 | 0.7857 | G |
| 28 | BICF2P279944            | 10879733 | A | 0.75 | 0.7857 | G |
| 28 | BICF2P1188806           | 10891431 | A | 0.75 | 0.7857 | G |
| 28 | BICF2P310712            | 10908139 | G | 0.75 | 0.7857 | A |
| 28 | BICF2S23523176          | 10918037 | A | 0.75 | 0.7857 | G |
| 28 | BICF2G630276728         | 10931543 | G | 0.25 | 0.2143 | A |
| 28 | BICF2G630276717         | 10938695 | A | 0.25 | 0.2143 | G |
| 28 | BICF2G630276716         | 10939574 | A | 0.25 | 0.2143 | T |
| 28 | BICF2S22942115          | 10946397 | A | 0    | 0      | G |
| 28 | BICF2G630276694         | 10949956 | G | 0.25 | 0.2143 | A |
| 28 | BICF2G630276689         | 10968166 | G | 0.25 | 0.2143 | A |
| 28 | BICF2P482228            | 10985023 | 0 | 0    | 0      | G |
| 28 | BICF2S23418734          | 10995429 | G | 0    | 0      | A |
| 28 | BICF2G630276686         | 11014102 | A | 0    | 0.3571 | G |
| 28 | BICF2G630276680         | 11025207 | A | 1    | 1      | G |
| 28 | BICF2G630276668         | 11039907 | A | 0    | 0      | G |
| 28 | BICF2G630276663         | 11041035 | G | 0    | 0      | A |
| 28 | BICF2G630276648         | 11044935 | A | 0    | 0      | G |
| 28 | BICF2S23122727          | 11066266 | A | 0    | 0      | G |
| 28 | BICF2P388437            | 11082636 | 0 | 0    | 0      | A |

|    |                         |          |   |      |        |   |
|----|-------------------------|----------|---|------|--------|---|
| 28 | BICF2G630276587         | 11105522 | 0 | 0    | 0      | A |
| 28 | BICF2G630276586         | 11123803 | A | 0.75 | 0.4286 | G |
| 28 | BICF2G630276581         | 11134112 | G | 0    | 0      | A |
| 28 | BICF2G630276575         | 11143722 | A | 0    | 0      | G |
| 28 | BICF2G630276560         | 11155776 | A | 0.75 | 0.4286 | C |
| 28 | BICF2G630276547         | 11167230 | C | 0    | 0      | A |
| 28 | BICF2G630276534         | 11177758 | G | 0    | 0      | A |
| 28 | BICF2G630276532         | 11180394 | G | 0.75 | 0.4286 | A |
| 28 | BICF2G630276520         | 11189962 | A | 0.75 | 0.4286 | G |
| 28 | BICF2G630276506         | 11200236 | A | 0    | 0      | G |
| 28 | BICF2G630276496         | 11208853 | C | 0.75 | 0.4286 | A |
| 28 | BICF2G630276493         | 11214991 | G | 0    | 0      | A |
| 28 | BICF2G630276489         | 11228621 | G | 0    | 0      | A |
| 28 | BICF2G630276472         | 11256070 | A | 0    | 0      | G |
| 28 | BICF2G630276466         | 11261992 | A | 0    | 0      | G |
| 28 | BICF2G630276447         | 11274828 | C | 0    | 0      | A |
| 28 | BICF2G630276440         | 11284656 | G | 0    | 0      | A |
| 28 | BICF2G630276435         | 11289077 | A | 0    | 0      | G |
| 28 | BICF2G630276424         | 11298433 | A | 0    | 0      | G |
| 28 | BICF2G630276419         | 11304604 | G | 0    | 0      | A |
| 28 | BICF2G630276405         | 11321149 | G | 0    | 0      | A |
| 28 | BICF2P98547             | 11332875 | A | 0    | 0      | G |
| 28 | BICF2G630276399         | 11349708 | G | 0    | 0      | A |
| 28 | BICF2P964985            | 11350718 | G | 0    | 0      | A |
| 28 | BICF2P1028358           | 11364553 | G | 0.25 | 0.2143 | A |
| 28 | TIGRP2P358384_rs8636622 | 11384804 | 0 | 0    | 0      | G |
| 28 | BICF2P870042            | 11395086 | G | 0.25 | 0.2143 | C |
| 28 | BICF2P446962            | 11397886 | G | 1    | 1      | A |
| 28 | BICF2P160863            | 11411022 | G | 0.25 | 0.2143 | A |
| 28 | BICF2G630276389         | 11418984 | G | 0.25 | 0.2143 | A |
| 28 | BICF2G630276380         | 11424280 | A | 0    | 0      | G |
| 28 | BICF2G630276373         | 11429815 | A | 0.25 | 0.5714 | G |
| 28 | BICF2G630276362         | 11438537 | A | 0.75 | 0.4286 | C |
| 28 | BICF2S23511059          | 11444645 | A | 0.75 | 0.4286 | C |
| 28 | BICF2G630276341         | 11463630 | G | 0.75 | 0.4286 | A |
| 28 | BICF2G630276332         | 11469673 | G | 0.75 | 0.4286 | A |
| 28 | BICF2G630276316         | 11489950 | A | 0.75 | 0.4286 | G |
| 28 | BICF2P661907            | 11506248 | A | 0.25 | 0.5714 | G |
| 28 | BICF2G630276304         | 11514933 | A | 0    | 0      | G |
| 28 | BICF2S23038499          | 11537407 | G | 0    | 0      | A |
| 28 | BICF2S2397704           | 11553167 | A | 0    | 0      | C |
| 28 | BICF2P688715            | 11578470 | 0 | 0    | 0      | A |
| 28 | BICF2P983033            | 11580557 | 0 | 0    | 0      | G |
| 28 | BICF2S2307934           | 11632577 | G | 0    | 0      | A |
| 28 | BICF2S23541759          | 11659452 | 0 | 0    | 0      | A |
| 28 | BICF2S23541632          | 11671986 | G | 0    | 0.3571 | A |
| 28 | BICF2G630276302         | 11686215 | G | 0.25 | 0.2143 | A |

|    |                         |          |   |      |        |   |
|----|-------------------------|----------|---|------|--------|---|
| 28 | BICF2G630276297         | 11745498 | A | 0.25 | 0.5714 | G |
| 28 | BICF2S2345455           | 11760045 | G | 0.25 | 0.5714 | A |
| 28 | BICF2G630276275         | 11766264 | A | 0.25 | 0.5714 | G |
| 28 | BICF2G630276273         | 11776283 | A | 0.25 | 0.2143 | G |
| 28 | BICF2S2346078           | 11805355 | C | 0    | 0      | A |
| 28 | BICF2S22936591          | 11816964 | A | 0    | 0      | G |
| 28 | BICF2P77595             | 11831984 | 0 | 0    | 0      | G |
| 28 | BICF2P77597             | 11833914 | 0 | 0    | 0      | G |
| 28 | BICF2S233966            | 11867148 | G | 0    | 0      | A |
| 28 | BICF2S23031207          | 11869904 | A | 0    | 0      | C |
| 28 | BICF2G630276269         | 11882453 | A | 0    | 0.3571 | G |
| 28 | BICF2S23739385          | 11894422 | A | 0    | 0      | G |
| 28 | BICF2P1313065           | 11913668 | A | 0.75 | 0.7857 | G |
| 28 | BICF2P854920            | 11927761 | 0 | 0    | 0      | A |
| 28 | BICF2P1189541           | 11939054 | 0 | 0    | 0      | A |
| 28 | BICF2S2336046           | 11959180 | A | 0    | 0      | C |
| 28 | BICF2S23746029          | 11964830 | A | 0    | 0      | G |
| 28 | BICF2P1246116           | 11974499 | 0 | 0    | 0      | A |
| 28 | BICF2P921712            | 11994999 | 0 | 0    | 0      | A |
| 28 | G1359f39S220            | 12022949 | 0 | 0    | 0      | C |
| 28 | BICF2G630276267         | 12044891 | 0 | 0    | 0      | G |
| 28 | BICF2P1002169           | 12057073 | 0 | 0    | 0      | A |
| 28 | BICF2S2346363           | 12064879 | G | 0    | 0      | A |
| 28 | BICF2S2347395           | 12075848 | A | 0    | 0      | G |
| 28 | BICF2S23713661          | 12109961 | 0 | 0    | 0      | G |
| 28 | BICF2S23621555          | 12138367 | A | 0    | 0      | G |
| 28 | BICF2P123735            | 12146343 | 0 | 0    | 0      | G |
| 28 | BICF2S23661834          | 12188984 | 0 | 0    | 0      | G |
| 28 | BICF2P566534            | 12206453 | 0 | 0    | 0      | A |
| 28 | BICF2P412781            | 12226618 | 0 | 0    | 0      | A |
| 28 | G1360f43S130            | 12258240 | 0 | 0    | 0      | G |
| 28 | BICF2P419077            | 12286975 | 0 | 0    | 0      | G |
| 28 | G1361f39S247            | 12308519 | A | 0    | 0      | G |
| 28 | BICF2P661772            | 12368159 | G | 0.25 | 0.5833 | A |
| 28 | BICF2P1439831           | 12377510 | 0 | 0    | 0      | A |
| 28 | BICF2P891681            | 12389789 | 0 | 0    | 0      | A |
| 28 | TIGRP2P358419_rs8935481 | 12399046 | 0 | 0    | 0      | C |
| 28 | BICF2P320518            | 12423573 | 0 | 0    | 0      | G |
| 28 | BICF2P469318            | 12468668 | 0 | 0    | 0      | G |
| 28 | BICF2G630276241         | 12498893 | A | 0.75 | 0.4286 | G |
| 28 | BICF2G630276238         | 12500880 | A | 1    | 0.375  | G |
| 28 | BICF2S23344361          | 12519672 | A | 0    | 0      | G |
| 28 | BICF2S23344054          | 12536177 | G | 0    | 0      | A |
| 28 | BICF2S23615021          | 12565214 | A | 0.75 | 0.4286 | G |
| 28 | BICF2G630276218         | 12574324 | G | 0.75 | 0.4286 | C |
| 28 | BICF2G630276213         | 12582877 | A | 0.75 | 0.4167 | G |
| 28 | BICF2G630276209         | 12594285 | G | 0.75 | 0.4286 | A |

|    |                 |          |   |      |        |   |
|----|-----------------|----------|---|------|--------|---|
| 28 | BICF2S23443965  | 12622994 | G | 0.75 | 0.4286 | A |
| 28 | BICF2G630276189 | 12636275 | A | 0.75 | 0.4286 | G |
| 28 | BICF2G630276186 | 12643516 | G | 0.75 | 0.4286 | A |
| 28 | BICF2G630276171 | 12657012 | G | 0    | 0      | A |
| 28 | BICF2G630276155 | 12665419 | A | 0    | 0      | G |
| 28 | BICF2G630276141 | 12683617 | A | 0    | 0      | G |
| 28 | BICF2G630276138 | 12690714 | G | 0    | 0      | A |
| 28 | BICF2G630276136 | 12700841 | G | 0    | 0      | A |
| 28 | BICF2G630276125 | 12713432 | A | 0    | 0      | G |
| 28 | BICF2P70060     | 12739994 | A | 0    | 0      | G |
| 28 | BICF2G630276092 | 12748371 | A | 0    | 0      | G |
| 28 | BICF2S23055144  | 12754304 | G | 0.25 | 0.5714 | A |
| 28 | BICF2G630276088 | 12754653 | A | 0    | 0      | G |
| 28 | BICF2G630276066 | 12773801 | G | 0.25 | 0.5714 | A |
| 28 | BICF2G630276065 | 12775756 | A | 0    | 0      | G |
| 28 | BICF2S23342409  | 12776607 | A | 0    | 0      | G |
| 28 | BICF2G630276060 | 12790774 | A | 0    | 0      | G |
| 28 | BICF2P1225366   | 12801292 | A | 0.25 | 0.5714 | G |
| 28 | BICF2P425938    | 12813631 | A | 0    | 0      | G |
| 28 | BICF2S23341215  | 12827605 | C | 0    | 0      | A |
| 28 | BICF2P465570    | 12837532 | 0 | 0    | 0      | A |
| 28 | BICF2P781454    | 12845721 | A | 0.25 | 0.5714 | G |
| 28 | BICF2S23028914  | 12860897 | 0 | 0    | 0      | C |
| 28 | BICF2G630276039 | 12875153 | G | 0.25 | 0.5714 | A |
| 28 | BICF2G630276026 | 12880168 | A | 0    | 0      | G |
| 28 | BICF2G630276014 | 12897683 | A | 0    | 0      | G |
| 28 | BICF2G630276012 | 12906831 | A | 0    | 0      | G |
| 28 | BICF2G630276008 | 12914582 | A | 0    | 0      | G |
| 28 | BICF2P1054958   | 12931916 | A | 0    | 0      | G |
| 28 | BICF2G630275998 | 12941728 | A | 0    | 0      | G |
| 28 | BICF2G630275988 | 12954571 | G | 0    | 0      | A |
| 28 | BICF2P493261    | 12962149 | A | 0    | 0      | G |
| 28 | BICF2S2373722   | 12972256 | A | 0.75 | 0.4286 | G |
| 28 | BICF2S2417072   | 12993351 | A | 0.75 | 0.4286 | C |
| 28 | BICF2G630275979 | 13002453 | 0 | 0    | 0      | G |
| 28 | BICF2P364333    | 13009409 | 0 | 0    | 0      | G |
| 28 | BICF2G630275978 | 13023702 | A | 0    | 0      | G |
| 28 | BICF2P1290872   | 13035486 | 0 | 0    | 0      | A |
| 28 | BICF2S23529598  | 13045954 | 0 | 0    | 0      | G |
| 28 | BICF2G630275968 | 13055439 | A | 0.25 | 0.5714 | G |
| 28 | BICF2G630275958 | 13066059 | A | 0.75 | 0.4286 | G |
| 28 | BICF2P44441     | 13077452 | G | 0.25 | 0.5714 | A |
| 28 | BICF2P261728    | 13090783 | G | 0.75 | 0.4286 | A |
| 28 | BICF2P258511    | 13126465 | A | 0.25 | 0.5714 | G |
| 28 | BICF2G630275925 | 13165702 | A | 0    | 0      | G |
| 28 | BICF2P692542    | 13174053 | A | 0.25 | 0.5714 | G |
| 28 | BICF2G630275914 | 13188852 | C | 0.75 | 0.4286 | G |

|    |                         |          |   |      |        |   |
|----|-------------------------|----------|---|------|--------|---|
| 28 | BICF2G630275911         | 13192772 | 0 | 0    | 0      | G |
| 28 | BICF2P319912            | 13215741 | 0 | 0    | 0      | A |
| 28 | BICF2G630275893         | 13264426 | G | 0.75 | 0.4286 | A |
| 28 | BICF2G630275889         | 13277550 | A | 1    | 0.4286 | G |
| 28 | BICF2P1251075           | 13298329 | A | 0.75 | 0.4286 | G |
| 28 | BICF2P263995            | 13307228 | 0 | 0    | 0      | A |
| 28 | BICF2G630275883         | 13323523 | A | 0.75 | 0.4286 | T |
| 28 | BICF2G630275879         | 13350192 | A | 0    | 0      | C |
| 28 | TIGRP2P358457_rs8669386 | 13351848 | 0 | 0    | 0      | G |
| 28 | BICF2G630275871         | 13363298 | A | 0.75 | 0.4286 | G |
| 28 | BICF2P68978             | 13384809 | 0 | 0    | 0      | G |
| 28 | BICF2S23434682          | 13389493 | A | 0.75 | 0.4286 | C |
| 28 | BICF2G630275869         | 13421481 | 0 | 0    | 0      | G |
| 28 | BICF2G630275863         | 13451168 | A | 0    | 0      | G |
| 28 | BICF2G630275848         | 13466368 | 0 | 0    | 0      | G |
| 28 | BICF2G630275843         | 13468818 | 0 | 0    | 0      | A |
| 28 | BICF2G630275829         | 13478480 | G | 0    | 0      | A |
| 28 | BICF2G630275803         | 13494314 | G | 0    | 0      | A |
| 28 | BICF2G630275797         | 13506616 | C | 0    | 0      | A |
| 28 | BICF2G630275788         | 13512782 | A | 0    | 0      | G |
| 28 | BICF2P1090634           | 13514710 | A | 0    | 0      | G |
| 28 | BICF2P501546            | 13542452 | G | 0    | 0      | A |
| 28 | BICF2P330944            | 13549719 | 0 | 0    | 0      | C |
| 28 | BICF2P1364358           | 13561138 | A | 0    | 0      | G |
| 28 | BICF2S23060341          | 13572557 | G | 0    | 0      | A |
| 28 | BICF2P290172            | 13608709 | G | 0    | 0      | A |
| 28 | BICF2G630275777         | 13623550 | G | 0    | 0      | A |
| 28 | BICF2G630275768         | 13628065 | G | 0    | 0      | A |
| 28 | BICF2P1178523           | 13645229 | A | 0    | 0      | G |
| 28 | BICF2P1065252           | 13651949 | 0 | 0    | 0      | G |
| 28 | BICF2P732038            | 13672562 | G | 0    | 0      | A |
| 28 | BICF2P777351            | 13675452 | G | 0    | 0      | A |
| 28 | BICF2P314515            | 13706514 | G | 0    | 0      | A |
| 28 | BICF2G630275752         | 13708171 | 0 | 0    | 0      | G |
| 28 | BICF2P1175048           | 13722534 | 0 | 0    | 0      | A |
| 28 | BICF2P275677            | 13737327 | 0 | 0    | 0      | C |
| 28 | BICF2P1251196           | 13759237 | 0 | 0    | 0      | A |
| 28 | BICF2G630275751         | 13790025 | G | 0    | 0      | A |
| 28 | BICF2G630275741         | 13804884 | A | 0    | 0      | G |
| 28 | BICF2G630275725         | 13818198 | A | 0    | 0      | G |
| 28 | BICF2S23144435          | 13824707 | G | 0    | 0      | A |
| 28 | BICF2G630275696         | 13844225 | A | 0    | 0      | G |
| 28 | BICF2P682795            | 13849916 | A | 0    | 0      | G |
| 28 | BICF2P682794            | 13849976 | A | 0    | 0      | G |
| 28 | BICF2P204607            | 13860179 | A | 0    | 0      | G |
| 28 | BICF2G630275666         | 13873250 | A | 0    | 0      | G |
| 28 | BICF2G630275648         | 13880918 | A | 0    | 0      | C |

|    |                         |          |   |      |        |   |
|----|-------------------------|----------|---|------|--------|---|
| 28 | BICF2G630275626         | 13913302 | T | 0    | 0      | A |
| 28 | BICF2P830014            | 13923622 | A | 0    | 0      | G |
| 28 | BICF2G630275617         | 13930090 | A | 0.75 | 0.4286 | C |
| 28 | BICF2P732222            | 13942764 | A | 0.75 | 0.4286 | G |
| 28 | BICF2G630275595         | 13952839 | C | 0    | 0      | G |
| 28 | BICF2G630275584         | 13964531 | A | 1    | 1      | G |
| 28 | BICF2G630275558         | 13979294 | A | 0    | 0      | G |
| 28 | BICF2G630275548         | 13984928 | A | 0.25 | 0.6    | C |
| 28 | BICF2G630275518         | 14004486 | G | 0    | 0      | A |
| 28 | BICF2G630275514         | 14004765 | A | 0    | 0      | G |
| 28 | BICF2P847206            | 14015518 | G | 0.25 | 0.5714 | A |
| 28 | BICF2G630275484         | 14020989 | C | 0.25 | 0.5714 | A |
| 28 | BICF2G630275446         | 14033314 | A | 0.25 | 0.5714 | G |
| 28 | BICF2G630275421         | 14057823 | A | 0    | 0      | G |
| 28 | BICF2G630275407         | 14064935 | A | 0    | 0      | G |
| 28 | BICF2S23713513          | 14074852 | A | 0    | 0      | G |
| 28 | BICF2S23232215          | 14079028 | C | 0.75 | 0.4167 | A |
| 28 | BICF2G630275367         | 14095415 | A | 0    | 0      | C |
| 28 | BICF2G630275361         | 14099875 | A | 0    | 0      | G |
| 28 | BICF2G630275342         | 14112022 | 0 | 0    | 0      | A |
| 28 | BICF2P567581            | 14114017 | A | 0    | 0      | G |
| 28 | BICF2G630275323         | 14123785 | 0 | 0    | 0      | A |
| 28 | BICF2G630275306         | 14139465 | A | 0.25 | 0.5714 | T |
| 28 | BICF2P969529            | 14146239 | A | 0.25 | 0.5714 | G |
| 28 | BICF2G630275274         | 14165705 | G | 0.25 | 0.5714 | A |
| 28 | BICF2P557456            | 14168223 | 0 | 0    | 0      | G |
| 28 | BICF2G630275252         | 14190921 | 0 | 0    | 0      | C |
| 28 | BICF2S23236132          | 14194007 | A | 0    | 0      | G |
| 28 | BICF2P542223            | 14204786 | C | 0    | 0      | A |
| 28 | BICF2G630275236         | 14219803 | A | 0    | 0      | G |
| 28 | TIGRP2P358471_rs8810993 | 14226255 | 0 | 0    | 0      | G |
| 28 | BICF2P914456            | 14244259 | C | 0    | 0      | G |
| 28 | BICF2G630275218         | 14252415 | G | 0    | 0      | A |
| 28 | BICF2G630275212         | 14269118 | G | 0    | 0      | A |
| 28 | BICF2G630275209         | 14272548 | G | 0    | 0      | A |
| 28 | BICF2P1221083           | 14289152 | A | 0    | 0      | G |
| 28 | BICF2G630275182         | 14300389 | 0 | 0    | 0      | A |
| 28 | BICF2P949915            | 14301161 | G | 0    | 0      | A |
| 28 | BICF2G630275178         | 14308754 | A | 0.5  | 0      | G |
| 28 | BICF2S23711308          | 14319936 | G | 0    | 0      | A |
| 28 | BICF2P397159            | 14337802 | A | 0    | 0      | G |
| 28 | BICF2P237417            | 14348374 | 0 | 0    | 0      | A |
| 28 | BICF2S23757542          | 14373792 | A | 0    | 0      | G |
| 28 | BICF2P152736            | 14374323 | G | 0    | 0      | A |
| 28 | BICF2P266637            | 14382234 | G | 0    | 0      | A |
| 28 | BICF2P266638            | 14382757 | G | 0    | 0      | A |
| 28 | BICF2P1325422           | 14393378 | C | 0    | 0      | A |



|    |                 |          |   |      |        |   |
|----|-----------------|----------|---|------|--------|---|
| 28 | BICF2S23553093  | 14401778 | A | 0    | 0      | G |
| 28 | BICF2P913443    | 14418882 | C | 0    | 0      | A |
| 28 | BICF2P1046049   | 14422416 | A | 0.25 | 0.5714 | G |
| 28 | BICF2S22938401  | 14436047 | G | 1    | 1      | A |
| 28 | BICF2P917980    | 14453410 | G | 1    | 1      | A |
| 28 | BICF2P505937    | 14455652 | A | 0    | 0      | G |
| 28 | BICF2P13293     | 14468572 | A | 0.25 | 0.5714 | G |
| 28 | BICF2P13787     | 14480902 | G | 0    | 0      | A |
| 28 | BICF2P407965    | 14493972 | G | 0.25 | 0.5714 | A |
| 28 | BICF2S22940670  | 14504701 | C | 0.25 | 0.5714 | A |
| 28 | BICF2P389932    | 14514593 | 0 | 0    | 0      | G |
| 28 | BICF2P130971    | 14524731 | A | 0    | 0      | G |
| 28 | BICF2P1250448   | 14546278 | A | 1    | 1      | G |
| 28 | BICF2S23029228  | 14556761 | A | 1    | 1      | G |
| 28 | BICF2P1404121   | 14562208 | A | 0    | 0      | C |
| 28 | BICF2S23449623  | 14566648 | G | 0    | 0      | A |
| 28 | BICF2P705706    | 14577447 | G | 0    | 0      | A |
| 28 | BICF2S23117525  | 14588026 | A | 0    | 0      | G |
| 28 | BICF2P1037997   | 14591897 | A | 0    | 0      | G |
| 28 | BICF2P1076684   | 14599198 | C | 0.75 | 0.4286 | A |
| 28 | BICF2S23748143  | 14607510 | A | 0.25 | 0.5714 | G |
| 28 | BICF2P1185567   | 14627770 | G | 0    | 0      | A |
| 28 | BICF2S23758274  | 14640657 | G | 0.25 | 0.5714 | A |
| 28 | BICF2P1185551   | 14662046 | C | 0.25 | 0.5714 | A |
| 28 | BICF2P447352    | 14678923 | A | 0    | 0      | C |
| 28 | BICF2P256251    | 14695941 | G | 0    | 0      | A |
| 28 | BICF2P750568    | 14702373 | A | 0    | 0      | G |
| 28 | BICF2S23619546  | 14716041 | A | 1    | 1      | G |
| 28 | BICF2P1256434   | 14721401 | G | 0.75 | 0.4286 | A |
| 28 | BICF2P425013    | 14734148 | G | 0.25 | 0.5714 | A |
| 28 | BICF2S23131918  | 14748833 | G | 0    | 0      | A |
| 28 | BICF2P164106    | 14773285 | A | 0    | 0      | G |
| 28 | BICF2P1013271   | 14778734 | G | 0.25 | 0.5714 | A |
| 28 | BICF2S23428301  | 14807889 | A | 0.25 | 0.5714 | G |
| 28 | BICF2P720941    | 14819175 | A | 1    | 1      | T |
| 28 | BICF2S23536456  | 14832665 | A | 0.25 | 0.5714 | G |
| 28 | BICF2P1056344   | 14838365 | A | 0.25 | 0.5714 | G |
| 28 | BICF2S23416098  | 14853346 | G | 1    | 1      | A |
| 28 | BICF2P839120    | 14860142 | G | 0.25 | 0.5714 | A |
| 28 | BICF2S23234011  | 14871896 | A | 0.75 | 0.4286 | G |
| 28 | BICF2P1396956   | 14892364 | A | 0.75 | 0.4286 | G |
| 28 | BICF2P1396955   | 14894286 | C | 0.25 | 0.5714 | A |
| 28 | BICF2G630275163 | 14908488 | A | 1    | 1      | C |
| 28 | BICF2G630275148 | 14920608 | C | 0.75 | 0.4286 | G |
| 28 | BICF2G630275140 | 14935001 | A | 0.75 | 0.4286 | G |
| 28 | BICF2P158599    | 14943986 | 0 | 0    | 0      | A |
| 28 | BICF2G630275132 | 14970543 | T | 0    | 0      | A |

|    |                 |          |   |      |        |   |
|----|-----------------|----------|---|------|--------|---|
| 28 | BICF2G630275117 | 14989228 | A | 0    | 0      | G |
| 28 | BICF2G630275115 | 15001741 | A | 0    | 0      | G |
| 28 | BICF2G630275105 | 15018256 | G | 1    | 1      | A |
| 28 | BICF2G630275100 | 15022394 | C | 1    | 1      | G |
| 28 | BICF2G630275096 | 15030553 | A | 0    | 0      | G |
| 28 | BICF2G630275086 | 15044455 | G | 0    | 0      | A |
| 28 | BICF2G630275059 | 15062646 | G | 0    | 0      | C |
| 28 | BICF2G630275056 | 15065737 | G | 0    | 0      | A |
| 28 | BICF2G630275039 | 15076793 | A | 0    | 0      | C |
| 28 | BICF2G630275004 | 15099148 | A | 0    | 0      | G |
| 28 | BICF2G630275001 | 15100036 | A | 0    | 0      | T |
| 28 | BICF2P27917     | 15103478 | G | 0    | 0      | C |
| 28 | BICF2P1266913   | 15114771 | A | 0    | 0      | G |
| 28 | BICF2G630274979 | 15122785 | A | 0    | 0      | G |
| 28 | BICF2G630274945 | 15136806 | A | 0    | 0      | G |
| 28 | BICF2P362384    | 15145639 | 0 | 0    | 0      | A |
| 28 | BICF2G630274931 | 15178626 | A | 0    | 0      | G |
| 28 | BICF2G630274930 | 15180283 | A | 0    | 0      | G |
| 28 | BICF2P362314    | 15195975 | A | 0.25 | 0.5714 | G |
| 28 | BICF2G630274923 | 15204899 | A | 0    | 0      | G |
| 28 | BICF2G630274922 | 15206544 | G | 0    | 0      | A |
| 28 | BICF2G630274917 | 15214673 | C | 0    | 0      | A |
| 28 | BICF2G630274915 | 15231968 | A | 0    | 0      | G |
| 28 | BICF2G630274893 | 15245763 | A | 0    | 0      | G |
| 28 | BICF2G630274885 | 15251657 | C | 0    | 0      | A |
| 28 | BICF2P254378    | 15282457 | 0 | 0    | 0      | A |
| 28 | BICF2G630274866 | 15284875 | A | 0    | 0      | G |
| 28 | BICF2S229624    | 15301796 | 0 | 0    | 0      | A |
| 28 | BICF2S2416217   | 15309392 | G | 0    | 0      | A |
| 28 | BICF2G630274861 | 15341589 | A | 0    | 0      | G |
| 28 | BICF2P1153166   | 15374260 | 0 | 0    | 0      | C |
| 28 | BICF2P447821    | 15387907 | A | 0    | 0      | G |
| 28 | BICF2G630274840 | 15420417 | C | 1    | 1      | G |
| 28 | BICF2S23454540  | 15446959 | A | 0.25 | 0.5714 | G |
| 28 | BICF2G630274837 | 15458412 | G | 0.75 | 0.4167 | A |
| 28 | BICF2S24319400  | 15468829 | A | 0    | 0      | G |
| 28 | BICF2G630274832 | 15468951 | A | 0    | 0      | G |
| 28 | BICF2P715190    | 15488380 | A | 0    | 0      | G |
| 28 | BICF2G630274811 | 15500005 | A | 0    | 0      | G |
| 28 | BICF2G630274809 | 15503484 | A | 0    | 0      | G |
| 28 | BICF2G630274797 | 15519767 | A | 0    | 0      | G |
| 28 | BICF2S22915734  | 15526757 | A | 0    | 0      | G |
| 28 | BICF2G630274791 | 15538728 | G | 1    | 1      | A |
| 28 | BICF2G630274787 | 15560827 | A | 0.75 | 0.4286 | G |
| 28 | BICF2S2307580   | 15578751 | A | 0.25 | 0.5714 | G |
| 28 | BICF2G630274785 | 15621898 | A | 0    | 0      | G |
| 28 | BICF2G630274781 | 15632079 | 0 | 0    | 0      | G |

|    |                         |          |   |      |        |   |
|----|-------------------------|----------|---|------|--------|---|
| 28 | BICF2G630274775         | 15641270 | 0 | 0    | 0      | G |
| 28 | BICF2G630274769         | 15661670 | G | 0    | 0      | A |
| 28 | BICF2P1118608           | 15666992 | A | 0    | 0      | G |
| 28 | BICF2G630274758         | 15677411 | A | 0    | 0      | C |
| 28 | BICF2G630274745         | 15688180 | A | 0    | 0      | G |
| 28 | BICF2G630274741         | 15691067 | G | 0    | 0      | A |
| 28 | BICF2G630274734         | 15697993 | A | 0    | 0      | G |
| 28 | BICF2G630274714         | 15710365 | G | 0.75 | 0.4286 | A |
| 28 | BICF2G630274698         | 15722639 | A | 0    | 0      | C |
| 28 | BICF2G630274685         | 15733384 | C | 0    | 0      | G |
| 28 | BICF2G630274666         | 15758759 | G | 0    | 0      | A |
| 28 | BICF2S23738201          | 15772597 | G | 0    | 0      | A |
| 28 | BICF2G630274642         | 15786953 | A | 0    | 0      | G |
| 28 | BICF2G630274628         | 15800490 | G | 0    | 0      | A |
| 28 | BICF2G630274624         | 15807372 | A | 0    | 0      | G |
| 28 | BICF2G630274617         | 15819295 | G | 0.25 | 0.5714 | A |
| 28 | BICF2G630274610         | 15831221 | C | 0    | 0      | G |
| 28 | BICF2G630274591         | 15838922 | A | 0    | 0      | G |
| 28 | BICF2G630274575         | 15852809 | A | 0    | 0      | G |
| 28 | BICF2G630274553         | 15867654 | A | 0    | 0      | G |
| 28 | BICF2G630274545         | 15877406 | C | 0    | 0      | G |
| 28 | BICF2G630274540         | 15881828 | G | 0    | 0      | A |
| 28 | BICF2G630274513         | 15894794 | A | 1    | 1      | G |
| 28 | BICF2G630274474         | 15907982 | A | 1    | 1      | G |
| 28 | BICF2G630274465         | 15916102 | A | 0    | 0      | G |
| 28 | BICF2G630274460         | 15927985 | G | 1    | 1      | A |
| 28 | BICF2G630274455         | 15950003 | G | 0    | 0      | A |
| 28 | BICF2G630274451         | 15953428 | A | 0    | 0      | G |
| 28 | BICF2G630274445         | 15982650 | A | 1    | 1      | G |
| 28 | BICF2P611533            | 15988194 | 0 | 0    | 0      | C |
| 28 | BICF2G630274441         | 15997899 | A | 0    | 0      | G |
| 28 | BICF2G630274436         | 16012713 | G | 0    | 0      | A |
| 28 | BICF2S23316439          | 16023744 | G | 0    | 0      | A |
| 28 | BICF2G630274429         | 16039215 | A | 0    | 0      | G |
| 28 | BICF2G630274425         | 16043469 | G | 0    | 0      | A |
| 28 | BICF2S2332115           | 16060255 | A | 0.75 | 0.4286 | C |
| 28 | BICF2G630274410         | 16074084 | G | 0    | 0      | A |
| 28 | BICF2G630274365         | 16111105 | A | 0    | 0.5833 | G |
| 28 | BICF2G630274363         | 16113999 | G | 0    | 0      | A |
| 28 | BICF2G630274357         | 16124839 | A | 0.75 | 0.4286 | G |
| 28 | BICF2G630274349         | 16145937 | G | 1    | 1      | A |
| 28 | BICF2G630274348         | 16149061 | G | 0    | 0      | A |
| 28 | TIGRP2P358504_rs9071693 | 16158398 | 0 | 0    | 0      | G |
| 28 | BICF2G630274336         | 16177758 | G | 1    | 1      | A |
| 28 | BICF2P383668            | 16189971 | 0 | 0    | 0      | A |
| 28 | BICF2G630274330         | 16200538 | A | 1    | 1      | G |
| 28 | BICF2G630274324         | 16209473 | A | 0    | 0      | G |

|    |                         |          |   |      |        |   |
|----|-------------------------|----------|---|------|--------|---|
| 28 | BICF2G630274318         | 16223697 | A | 1    | 1      | G |
| 28 | BICF2G630274312         | 16239585 | G | 1    | 1      | A |
| 28 | BICF2S23053725          | 16259057 | G | 0    | 0      | A |
| 28 | BICF2S23642773          | 16278063 | A | 0.25 | 0.5714 | C |
| 28 | BICF2P296763            | 16285854 | G | 0    | 0      | A |
| 28 | BICF2P917904            | 16325572 | A | 0.75 | 0.4286 | G |
| 28 | BICF2G630274292         | 16330386 | A | 0    | 0      | C |
| 28 | BICF2P612192            | 16349849 | C | 0.25 | 0.5714 | A |
| 28 | BICF2P360668            | 16354022 | G | 0.25 | 0.5714 | A |
| 28 | BICF2G630274276         | 16366903 | A | 0.25 | 0.5714 | G |
| 28 | BICF2G630274273         | 16377903 | G | 0    | 0      | A |
| 28 | BICF2G630274270         | 16397080 | 0 | 0    | 0      | G |
| 28 | BICF2P1327156           | 16425029 | A | 0.25 | 0.5714 | G |
| 28 | BICF2G630274265         | 16436113 | A | 0    | 0      | G |
| 28 | TIGRP2P358506_rs8808749 | 16446104 | 0 | 0    | 0      | G |
| 28 | BICF2G630274254         | 16458531 | A | 0.25 | 0.5714 | G |
| 28 | BICF2P71788             | 16467099 | A | 0    | 0      | C |
| 28 | BICF2G630274247         | 16475564 | A | 0.75 | 0.4286 | G |
| 28 | BICF2P1424295           | 16482891 | G | 0    | 0      | A |
| 28 | BICF2P1204904           | 16490303 | G | 0    | 0      | A |
| 28 | BICF2P879800            | 16495700 | A | 0    | 0      | G |
| 28 | BICF2G630274242         | 16511123 | A | 0.25 | 0.5714 | G |
| 28 | BICF2G630274239         | 16520952 | A | 0    | 0      | G |
| 28 | BICF2P1207458           | 16549509 | C | 0.25 | 0.5714 | A |
| 28 | BICF2G630274213         | 16566308 | A | 0    | 0      | G |
| 28 | BICF2G630274210         | 16577507 | G | 0    | 0      | A |
| 28 | BICF2G630274207         | 16587113 | A | 0.25 | 0.5714 | T |
| 28 | BICF2G630274199         | 16595572 | A | 0    | 0      | C |
| 28 | BICF2S23348861          | 16611642 | A | 0    | 0      | G |
| 28 | BICF2G630274188         | 16619623 | A | 0.25 | 0.5714 | G |
| 28 | BICF2G630274175         | 16644571 | A | 0.25 | 0.5714 | C |
| 28 | BICF2P663630            | 16652852 | G | 0    | 0      | A |
| 28 | BICF2P1032812           | 16665284 | G | 0.25 | 0.5714 | A |
| 28 | BICF2G630274157         | 16689320 | A | 0    | 0.5833 | G |
| 28 | BICF2G630274128         | 16715953 | A | 0.25 | 0.5714 | G |
| 28 | BICF2P1123180           | 16731798 | A | 0    | 0      | G |
| 28 | BICF2P788432            | 16736897 | 0 | 0    | 0      | A |
| 28 | BICF2P1094360           | 16753726 | G | 0.75 | 0.4286 | A |
| 28 | BICF2P1047858           | 16762269 | A | 0.75 | 0.4    | G |
| 28 | BICF2P1092145           | 16789578 | A | 0.75 | 0.4167 | G |
| 28 | BICF2P1384041           | 16792086 | A | 0.25 | 0.5714 | G |
| 28 | BICF2P159333            | 16802892 | A | 0.75 | 0.4286 | C |
| 28 | BICF2P887204            | 16813801 | 0 | 0    | 0      | C |
| 28 | G1363f27S150            | 16835714 | 0 | 0    | 0      | C |
| 28 | BICF2S2363864           | 16857787 | G | 0    | 0      | A |
| 28 | BICF2S23033967          | 16860736 | A | 0    | 0      | G |
| 28 | BICF2P743377            | 16889384 | G | 0    | 0      | A |

|    |                         |          |   |      |        |   |
|----|-------------------------|----------|---|------|--------|---|
| 28 | BICF2S23738265          | 16902038 | C | 0    | 0      | A |
| 28 | BICF2P268103            | 16912692 | A | 0.25 | 0.5833 | C |
| 28 | BICF2P67960             | 16918359 | G | 0    | 0      | A |
| 28 | BICF2P213776            | 16934301 | A | 0    | 0      | C |
| 28 | BICF2P1135649           | 16942707 | A | 0    | 0      | G |
| 28 | BICF2P379960            | 16959919 | G | 0    | 0      | A |
| 28 | BICF2P487896            | 16966865 | 0 | 0    | 0      | C |
| 28 | BICF2P360405            | 16982042 | G | 0.25 | 0.5    | A |
| 28 | BICF2P737446            | 17048660 | 0 | 0    | 0      | A |
| 28 | BICF2P648636            | 17075943 | C | 0.75 | 0.5    | A |
| 28 | BICF2P158927            | 17092786 | 0 | 0    | 0      | A |
| 28 | BICF2P859614            | 17109565 | A | 0.75 | 0.5    | G |
| 28 | BICF2S23336699          | 17112677 | A | 1    | 0.5    | G |
| 28 | BICF2P498743            | 17124373 | G | 0    | 0      | A |
| 28 | G1365f48S57             | 17149571 | 0 | 0    | 0      | C |
| 28 | BICF2S2368182           | 17174804 | C | 0.75 | 0.5    | G |
| 28 | BICF2P29438             | 17198729 | 0 | 0    | 0      | A |
| 28 | G1366f81S151            | 17207322 | G | 0    | 0      | A |
| 28 | BICF2S2441082           | 17218300 | 0 | 0    | 0      | A |
| 28 | BICF2P373257            | 17240335 | G | 0.5  | 0.2143 | A |
| 28 | BICF2P702787            | 17254616 | A | 0.5  | 0.2143 | G |
| 28 | BICF2P1037272           | 17262605 | G | 0.5  | 0.2143 | A |
| 28 | BICF2P1061178           | 17276902 | G | 0.5  | 0.2143 | A |
| 28 | BICF2S23630848          | 17287544 | 0 | 0    | 0      | G |
| 28 | BICF2S23237027          | 17317072 | G | 0.75 | 0.7143 | A |
| 28 | BICF2P615230            | 17322901 | A | 0.75 | 0.7143 | G |
| 28 | BICF2P299379            | 17332888 | G | 0.75 | 0.8    | A |
| 28 | BICF2P460451            | 17336564 | C | 0.5  | 0.2143 | A |
| 28 | TIGRP2P358520_rs8803720 | 17351877 | 0 | 0    | 0      | G |
| 28 | BICF2G630274126         | 17360571 | G | 0.25 | 0.5    | A |
| 28 | BICF2G630274123         | 17373919 | A | 0    | 0      | T |
| 28 | BICF2G630274109         | 17385901 | G | 0.25 | 0.5    | A |
| 28 | BICF2G630274105         | 17391286 | G | 0.25 | 0.5    | A |
| 28 | BICF2G630274085         | 17404761 | A | 0.25 | 0.5    | G |
| 28 | BICF2P1008515           | 17420443 | C | 0.25 | 0.5    | A |
| 28 | BICF2G630274071         | 17436947 | C | 0    | 0      | A |
| 28 | BICF2G630274059         | 17456920 | G | 0.25 | 0.5    | A |
| 28 | BICF2G630274058         | 17457699 | G | 0    | 0      | A |
| 28 | BICF2G630274044         | 17474817 | G | 0    | 0      | A |
| 28 | BICF2G630274031         | 17509494 | A | 0    | 0      | C |
| 28 | BICF2G630274021         | 17525682 | G | 0    | 0      | A |
| 28 | TIGRP2P358525_rs8896977 | 17530637 | 0 | 0    | 0      | A |
| 28 | BICF2G630274010         | 17537678 | A | 0    | 0      | G |
| 28 | BICF2G630273998         | 17551601 | A | 0    | 0      | G |
| 28 | BICF2G630273994         | 17565974 | C | 0    | 0      | A |
| 28 | BICF2P1279075           | 17572156 | 0 | 0    | 0      | G |
| 28 | BICF2P1333516           | 17591106 | A | 0    | 0      | G |

|    |                         |          |   |      |        |   |
|----|-------------------------|----------|---|------|--------|---|
| 28 | BICF2G630273976         | 17595539 | A | 0    | 0      | G |
| 28 | BICF2G630273967         | 17614604 | A | 0    | 0      | G |
| 28 | BICF2P171634            | 17618125 | G | 0    | 0      | A |
| 28 | BICF2S23911084          | 17623693 | 0 | 0    | 0      | G |
| 28 | BICF2P63867             | 17639644 | G | 0.5  | 0.2143 | A |
| 28 | BICF2P174880            | 17645227 | A | 0.5  | 0.2143 | G |
| 28 | BICF2P762305            | 17665542 | A | 0.5  | 0.7857 | G |
| 28 | BICF2S23634522          | 17677289 | G | 0.5  | 0.7857 | A |
| 28 | BICF2P898601            | 17698077 | A | 0.25 | 0.2857 | G |
| 28 | BICF2P274728            | 17698624 | 0 | 0    | 0      | A |
| 28 | BICF2P242291            | 17711539 | C | 0.25 | 0.2857 | A |
| 28 | BICF2P161081            | 17722381 | A | 0.25 | 0.2857 | G |
| 28 | BICF2P544334            | 17735112 | G | 0.5  | 0.7857 | A |
| 28 | BICF2P1439464           | 17758978 | G | 0.25 | 0.5    | A |
| 28 | TIGRP2P358534_rs8934924 | 17776258 | 0 | 0    | 0      | A |
| 28 | BICF2P151382            | 17785182 | 0 | 0    | 0      | A |
| 28 | BICF2P172036            | 17806463 | 0 | 0    | 0      | G |
| 28 | BICF2P60358             | 17817802 | 0 | 0    | 0      | G |
| 28 | G1367f44S252            | 17848482 | 0 | 0    | 0      | C |
| 28 | BICF2P436534            | 17872618 | 0 | 0    | 0      | A |
| 28 | BICF2P254735            | 17903724 | 0 | 0    | 0      | C |
| 28 | BICF2P507038            | 17911194 | C | 0.25 | 0.2857 | A |
| 28 | BICF2P484008            | 17918608 | 0 | 0    | 0      | G |
| 28 | BICF2P1155349           | 17933749 | 0 | 0    | 0      | G |
| 28 | BICF2P973994            | 17949755 | 0 | 0    | 0      | G |
| 28 | BICF2P530491            | 17995670 | 0 | 0    | 0      | A |
| 28 | BICF2P738713            | 18004720 | A | 0.5  | 0.7857 | G |
| 28 | BICF2P1328384           | 18012760 | G | 0.5  | 0.2143 | A |
| 28 | BICF2P423735            | 18041722 | A | 0.5  | 0.7857 | G |
| 28 | BICF2P1314805           | 18046680 | G | 0.5  | 0.7857 | A |
| 28 | BICF2P773892            | 18061910 | A | 0.5  | 0.7857 | G |
| 28 | BICF2P474039            | 18084740 | G | 0.25 | 0.5    | A |
| 28 | TIGRP2P358541_rs8847717 | 18090247 | 0 | 0    | 0      | G |
| 28 | BICF2P1317385           | 18107070 | G | 0.25 | 0.5    | A |
| 28 | BICF2G630273946         | 18121817 | A | 0    | 0      | G |
| 28 | BICF2G630273938         | 18135059 | A | 0    | 0      | G |
| 28 | BICF2G630273935         | 18139684 | A | 0    | 0      | G |
| 28 | BICF2G630273930         | 18146434 | G | 0    | 0      | A |
| 28 | BICF2G630273925         | 18154878 | C | 0.75 | 0.75   | A |
| 28 | BICF2G630273924         | 18161375 | A | 0.75 | 0.7143 | G |
| 28 | BICF2P523937            | 18190079 | G | 0    | 0      | A |
| 28 | BICF2P81397             | 18193969 | A | 0    | 0      | G |
| 28 | BICF2G630273921         | 18205830 | A | 0    | 0      | G |
| 28 | BICF2G630273873         | 18235890 | A | 0.75 | 0.5    | G |
| 28 | BICF2P1288394           | 18243906 | A | 0    | 0      | C |
| 28 | BICF2P1098546           | 18251668 | 0 | 0    | 0      | A |
| 28 | BICF2P1181134           | 18269627 | A | 0    | 0      | G |

|    |                         |          |   |      |        |   |
|----|-------------------------|----------|---|------|--------|---|
| 28 | BICF2P446744            | 18284571 | G | 0.75 | 0.5    | A |
| 28 | BICF2S23340007          | 18294682 | A | 0.75 | 0.5    | G |
| 28 | BICF2G630273871         | 18297995 | C | 0.25 | 0.5    | G |
| 28 | BICF2G630273857         | 18307788 | G | 0    | 0      | A |
| 28 | BICF2P1170667           | 18323521 | C | 0.25 | 0.5    | A |
| 28 | BICF2P523978            | 18333866 | G | 0.25 | 0.5    | A |
| 28 | BICF2G630273827         | 18348290 | G | 0.25 | 0.5    | A |
| 28 | BICF2G630273820         | 18349488 | G | 0    | 0      | A |
| 28 | BICF2S2374768           | 18355745 | A | 0    | 0      | G |
| 28 | BICF2G630273793         | 18372855 | A | 0.25 | 0.5    | G |
| 28 | BICF2P1339030           | 18380218 | G | 0    | 0      | A |
| 28 | BICF2G630273768         | 18390670 | A | 0    | 0.5    | G |
| 28 | BICF2G630273757         | 18398636 | C | 0.25 | 0.5    | A |
| 28 | BICF2G630273749         | 18411447 | A | 0    | 0      | G |
| 28 | BICF2G630273740         | 18430142 | G | 0.25 | 0.5    | A |
| 28 | BICF2G630273732         | 18441180 | G | 1    | 1      | A |
| 28 | BICF2G630273730         | 18448411 | C | 0    | 0      | A |
| 28 | BICF2G630273728         | 18460052 | A | 0    | 0      | G |
| 28 | BICF2P488993            | 18479967 | A | 0.5  | 0.7857 | G |
| 28 | BICF2P488995            | 18482867 | A | 0    | 0      | G |
| 28 | BICF2G630273720         | 18499040 | G | 0    | 0      | A |
| 28 | BICF2S22932088          | 18513121 | A | 1    | 1      | G |
| 28 | BICF2G630273718         | 18518053 | A | 0.25 | 0.5    | G |
| 28 | BICF2S23255408          | 18547353 | G | 0.25 | 0.5    | A |
| 28 | BICF2S23123631          | 18551436 | A | 0.25 | 0.5    | G |
| 28 | BICF2G630273708         | 18562462 | T | 0.25 | 0.5    | A |
| 28 | BICF2S23755691          | 18579699 | G | 0    | 0      | A |
| 28 | BICF2G630273702         | 18592149 | A | 0.25 | 0.5    | G |
| 28 | BICF2S2292933           | 18599986 | G | 0    | 0      | A |
| 28 | BICF2P844325            | 18631015 | G | 0.5  | 0.2143 | A |
| 28 | BICF2S2351188           | 18664002 | A | 0    | 0      | G |
| 28 | BICF2G630273659         | 18664908 | A | 1    | 1      | G |
| 28 | BICF2G630273644         | 18681554 | 0 | 0    | 0      | A |
| 28 | BICF2G630273642         | 18693454 | G | 0    | 0      | A |
| 28 | BICF2G630273639         | 18700380 | G | 0    | 0      | A |
| 28 | BICF2P1059065           | 18728873 | 0 | 0    | 0      | A |
| 28 | BICF2G630273626         | 18735719 | A | 0.75 | 0.7143 | G |
| 28 | BICF2G630273623         | 18755066 | C | 0.75 | 0.7143 | A |
| 28 | TIGRP2P358571_rs8914720 | 18757502 | 0 | 0    | 0      | A |
| 28 | BICF2P985144            | 18777147 | A | 0    | 0      | C |
| 28 | BICF2P1394164           | 18792966 | A | 0.25 | 0.5    | G |
| 28 | BICF2P1394163           | 18793027 | C | 0.25 | 0.5    | A |
| 28 | BICF2P517094            | 18801166 | A | 0    | 0      | G |
| 28 | BICF2S23537623          | 18803093 | 0 | 0    | 0      | G |
| 28 | BICF2P32357             | 18806031 | A | 0    | 0      | G |
| 28 | BICF2P627562            | 18815431 | A | 0    | 0      | G |
| 28 | BICF2P627561            | 18815803 | A | 0.25 | 0.5    | G |

|    |                 |          |   |      |        |   |
|----|-----------------|----------|---|------|--------|---|
| 28 | BICF2P1238932   | 18829058 | A | 0    | 0      | G |
| 28 | BICF2G630273619 | 18830668 | A | 0.5  | 0.7857 | G |
| 28 | BICF2S23016952  | 18843939 | A | 0    | 0      | G |
| 28 | BICF2P1093393   | 18848468 | G | 0.25 | 0.5    | A |
| 28 | BICF2P586353    | 18859974 | 0 | 0    | 0      | G |
| 28 | BICF2S23340128  | 18862446 | T | 0.5  | 0.2143 | A |
| 28 | BICF2G630273602 | 18877234 | G | 0.5  | 0.2143 | A |
| 28 | BICF2P574071    | 18894152 | G | 0.5  | 0.2143 | A |
| 28 | BICF2P574066    | 18895682 | 0 | 0    | 0      | G |
| 28 | BICF2P134610    | 18907183 | G | 0    | 0      | A |
| 28 | BICF2P477285    | 18921453 | A | 0.25 | 0.5    | T |
| 28 | BICF2P642079    | 18933001 | A | 0.25 | 0.5    | G |
| 28 | BICF2G630273572 | 18950973 | G | 0.25 | 0.5    | A |
| 28 | BICF2G630273558 | 18962424 | G | 0.25 | 0.5    | A |
| 28 | BICF2G630273554 | 18965984 | G | 0.25 | 0.5    | A |
| 28 | BICF2P793734    | 18981254 | A | 0.75 | 0.5    | T |
| 28 | BICF2S23315969  | 18994401 | A | 0.5  | 0.7857 | C |
| 28 | BICF2G630273550 | 19003234 | A | 0    | 0      | G |
| 28 | BICF2G630273537 | 19012713 | G | 0.25 | 0.2857 | A |
| 28 | BICF2G630273521 | 19028947 | A | 0.5  | 0.2143 | G |
| 28 | BICF2S23334005  | 19039019 | A | 0.25 | 0.2857 | G |
| 28 | BICF2P271735    | 19050894 | A | 0.25 | 0.2857 | G |
| 28 | BICF2G630273497 | 19055857 | C | 0    | 0      | A |
| 28 | BICF2G630273466 | 19078356 | A | 0.25 | 0.2857 | G |
| 28 | BICF2P297078    | 19079648 | A | 0.25 | 0.25   | G |
| 28 | BICF2S23253999  | 19085030 | T | 0.5  | 0.7857 | A |
| 28 | BICF2G630273432 | 19096579 | G | 0.25 | 0.5    | A |
| 28 | BICF2P1141307   | 19101982 | G | 0.25 | 0.2857 | A |
| 28 | BICF2G630273425 | 19108753 | G | 0.25 | 0.5    | C |
| 28 | BICF2G630273424 | 19108962 | A | 0.25 | 0.25   | G |
| 28 | BICF2G630273416 | 19114703 | A | 0.25 | 0.2857 | G |
| 28 | BICF2G630273405 | 19125009 | G | 0.75 | 0.5    | A |
| 28 | BICF2G630273375 | 19139089 | 0 | 0    | 0      | G |
| 28 | BICF2S23044899  | 19157793 | G | 0.5  | 0.7857 | A |
| 28 | BICF2P1336487   | 19160883 | A | 0.5  | 0.7857 | G |
| 28 | BICF2S2308509   | 19187178 | G | 0    | 0      | A |
| 28 | BICF2G630273327 | 19196259 | G | 0    | 0      | A |
| 28 | BICF2G630273309 | 19205585 | G | 0    | 0      | A |
| 28 | BICF2G630273287 | 19226244 | A | 0    | 0      | G |
| 28 | BICF2G630273285 | 19229275 | G | 0    | 0      | A |
| 28 | BICF2G630273280 | 19240834 | A | 0    | 0      | G |
| 28 | BICF2G630273262 | 19259235 | A | 0    | 0      | G |
| 28 | BICF2G630273250 | 19261940 | A | 0    | 0      | G |
| 28 | BICF2G630273236 | 19270064 | A | 0    | 0      | G |
| 28 | BICF2G630273208 | 19281278 | G | 0    | 0      | A |
| 28 | BICF2G630273196 | 19285617 | A | 0    | 0      | G |
| 28 | BICF2G630273182 | 19312692 | C | 0    | 0      | A |



|    |                         |          |   |      |        |   |
|----|-------------------------|----------|---|------|--------|---|
| 28 | BICF2G630273175         | 19322814 | A | 1    | 1      | G |
| 28 | BICF2G630273168         | 19339287 | G | 1    | 1      | A |
| 28 | BICF2G630273159         | 19344307 | A | 1    | 1      | G |
| 28 | BICF2G630273157         | 19354316 | G | 0    | 0      | A |
| 28 | BICF2G630273148         | 19358780 | A | 0    | 0      | G |
| 28 | BICF2G630273135         | 19366113 | C | 0    | 0      | A |
| 28 | BICF2G630273096         | 19382226 | G | 0    | 0      | A |
| 28 | BICF2G630273095         | 19382310 | G | 0    | 0      | A |
| 28 | BICF2G630273062         | 19392507 | A | 0    | 0      | G |
| 28 | BICF2G630273056         | 19395761 | G | 0    | 0      | A |
| 28 | BICF2G630273042         | 19402232 | A | 0    | 0      | G |
| 28 | BICF2G630273017         | 19413204 | A | 1    | 1      | G |
| 28 | BICF2G630272995         | 19435829 | G | 1    | 1      | A |
| 28 | BICF2G630272974         | 19452385 | A | 1    | 1      | G |
| 28 | BICF2G630272958         | 19459431 | A | 1    | 1      | G |
| 28 | BICF2G630272957         | 19459564 | A | 1    | 1      | C |
| 28 | BICF2G630272937         | 19470334 | G | 1    | 1      | A |
| 28 | BICF2G630272887         | 19498556 | A | 0    | 0      | G |
| 28 | BICF2P55898             | 19504379 | G | 0.5  | 0.7857 | A |
| 28 | BICF2G630272875         | 19518436 | A | 0    | 0      | G |
| 28 | BICF2G630272870         | 19532071 | G | 1    | 1      | A |
| 28 | BICF2S23759765          | 19541334 | A | 0.75 | 0.5    | C |
| 28 | BICF2G630272833         | 19562031 | G | 0.25 | 0.5    | A |
| 28 | BICF2P696876            | 19589421 | G | 0    | 0      | A |
| 28 | TIGRP2P358586_rs9149363 | 19601353 | 0 | 0    | 0      | G |
| 28 | BICF2P379154            | 19613178 | 0 | 0    | 0      | G |
| 28 | BICF2G630272816         | 19619063 | A | 1    | 1      | C |
| 28 | BICF2G630272808         | 19642961 | 0 | 0    | 0      | C |
| 28 | BICF2P1163688           | 19661852 | A | 0.25 | 0.5    | C |
| 28 | BICF2G630272796         | 19672501 | A | 0.25 | 0.5    | T |
| 28 | BICF2P270200            | 19679578 | 0 | 0    | 0      | G |
| 28 | BICF2G630272783         | 19695233 | G | 0    | 0.5    | A |
| 28 | TIGRP2P358589_rs8957137 | 19704412 | 0 | 0    | 0      | G |
| 28 | BICF2G630272776         | 19713059 | A | 0.25 | 0.5    | G |
| 28 | BICF2G630272750         | 19729326 | A | 0.25 | 0.5    | G |
| 28 | BICF2G630272729         | 19744585 | A | 0.25 | 0.5    | G |
| 28 | BICF2G630272713         | 19751644 | G | 0.25 | 0.5    | A |
| 28 | BICF2G630272697         | 19757000 | A | 0.25 | 0.5    | G |
| 28 | BICF2G630272664         | 19769949 | A | 0    | 0      | G |
| 28 | BICF2G630272659         | 19777852 | 0 | 0    | 0      | G |
| 28 | BICF2P758863            | 19789842 | T | 0.25 | 0.5    | A |
| 28 | BICF2P758862            | 19790512 | A | 0.25 | 0.5    | G |
| 28 | BICF2G630272642         | 19801605 | A | 0    | 0      | C |
| 28 | BICF2P1338176           | 19813124 | A | 0    | 0      | G |
| 28 | BICF2G630272610         | 19823112 | A | 0.25 | 0.5    | G |
| 28 | BICF2P741343            | 19826595 | G | 0    | 0      | A |
| 28 | BICF2P344617            | 19843917 | G | 0    | 0      | A |

|    |                 |          |   |      |        |   |
|----|-----------------|----------|---|------|--------|---|
| 28 | BICF2P344620    | 19844109 | A | 0    | 0      | T |
| 28 | BICF2P323326    | 19852209 | A | 0.25 | 0.5    | G |
| 28 | BICF2P633280    | 19857702 | A | 0    | 0      | G |
| 28 | BICF2G630272578 | 19857821 | C | 0.25 | 0.5    | G |
| 28 | BICF2G630272570 | 19860745 | G | 0.25 | 0.5    | A |
| 28 | BICF2P554736    | 19876193 | A | 0    | 0      | G |
| 28 | BICF2P395516    | 19883965 | 0 | 0    | 0      | A |
| 28 | BICF2P852048    | 19897055 | G | 0    | 0      | A |
| 28 | BICF2G630272563 | 19915669 | A | 0    | 0      | G |
| 28 | BICF2G630272551 | 19919898 | C | 0    | 0      | A |
| 28 | BICF2S23516325  | 19935485 | A | 0.5  | 0.2143 | G |
| 28 | BICF2G630272523 | 19945116 | A | 0.75 | 0.5    | G |
| 28 | BICF2G630272503 | 19957809 | G | 0.5  | 0.2143 | A |
| 28 | BICF2G630272482 | 19965122 | G | 0    | 0      | A |
| 28 | BICF2G630272454 | 19979408 | A | 0.5  | 0.2143 | G |
| 28 | BICF2S22925113  | 19989761 | G | 0.75 | 0.7143 | A |
| 28 | BICF2P216434    | 20002430 | A | 1    | 1      | C |
| 28 | BICF2G630272424 | 20011270 | A | 0.5  | 0.7857 | G |
| 28 | BICF2P691544    | 20021746 | G | 1    | 1      | A |
| 28 | BICF2G630272409 | 20039037 | G | 0.25 | 0.5    | A |
| 28 | BICF2G630272407 | 20048165 | A | 0    | 0      | G |
| 28 | BICF2G630272387 | 20066978 | C | 0    | 0      | G |
| 28 | BICF2G630272381 | 20067886 | A | 0.25 | 0.5    | G |
| 28 | BICF2S23315646  | 20086204 | A | 0    | 0      | G |
| 28 | BICF2P351268    | 20110252 | 0 | 0    | 0      | A |
| 28 | BICF2S22913187  | 20115734 | A | 0.25 | 0.5    | G |
| 28 | BICF2P236327    | 20126667 | 0 | 0    | 0      | A |
| 28 | BICF2P386862    | 20138224 | 0 | 0    | 0      | G |
| 28 | BICF2S23215322  | 20141408 | C | 0.75 | 0.7143 | A |
| 28 | BICF2S2374111   | 20150008 | G | 0    | 0      | A |
| 28 | BICF2P528734    | 20166990 | A | 0    | 0      | C |
| 28 | BICF2S23453573  | 20178572 | G | 0.25 | 0.5    | A |
| 28 | BICF2P333561    | 20185410 | G | 0.25 | 0.5    | A |
| 28 | BICF2P1132244   | 20194080 | 0 | 0    | 0      | G |
| 28 | BICF2P1132243   | 20194138 | G | 0    | 0      | A |
| 28 | BICF2S23033345  | 20206558 | G | 0    | 0      | A |
| 28 | BICF2P1116104   | 20218229 | A | 0.5  | 0.2143 | C |
| 28 | BICF2S23111993  | 20237946 | G | 0.25 | 0.2857 | A |
| 28 | BICF2S2301467   | 20251130 | A | 0    | 0      | G |
| 28 | BICF2P1022012   | 20267774 | C | 0    | 0      | A |
| 28 | BICF2S23528049  | 20293294 | A | 0    | 0      | G |
| 28 | BICF2S23528050  | 20293382 | G | 0    | 0      | C |
| 28 | BICF2S2412952   | 20305096 | G | 0.5  | 0.2143 | A |
| 28 | BICF2P244376    | 20313175 | G | 0.5  | 0.2143 | A |
| 28 | BICF2P1366036   | 20323236 | A | 0.25 | 0.2857 | G |
| 28 | BICF2S2313888   | 20337347 | A | 0.25 | 0.2857 | C |
| 28 | BICF2P41163     | 20350909 | A | 1    | 1      | G |

|    |                         |          |   |      |        |   |
|----|-------------------------|----------|---|------|--------|---|
| 28 | BICF2P1500513           | 20357544 | A | 0.5  | 0.7857 | G |
| 28 | BICF2P1412210           | 20370899 | A | 0.5  | 0.2143 | G |
| 28 | BICF2P261871            | 20383064 | A | 0    | 0      | C |
| 28 | BICF2S23334964          | 20392766 | A | 0.5  | 0.2143 | G |
| 28 | BICF2S23757994          | 20402926 | C | 0    | 0      | A |
| 28 | BICF2P337029            | 20418688 | A | 1    | 1      | G |
| 28 | BICF2S23764393          | 20431380 | A | 0.5  | 0.7857 | G |
| 28 | BICF2P1041039           | 20446571 | A | 0    | 0      | T |
| 28 | BICF2P1065837           | 20456983 | A | 0    | 0      | G |
| 28 | BICF2P1102236           | 20458899 | G | 0.25 | 0.2857 | A |
| 28 | BICF2S22933137          | 20475956 | A | 0.75 | 0.7143 | G |
| 28 | BICF2P1050558           | 20484069 | 0 | 0    | 0      | G |
| 28 | BICF2S2327558           | 20512856 | G | 0    | 0      | A |
| 28 | BICF2S23048419          | 20524048 | G | 0.5  | 0.2143 | A |
| 28 | BICF2P554810            | 20537150 | A | 0    | 0      | G |
| 28 | BICF2P1038959           | 20545069 | A | 0.25 | 0.2857 | G |
| 28 | BICF2P1021119           | 20551237 | G | 0    | 0.25   | A |
| 28 | BICF2S23419158          | 20563231 | T | 0.75 | 0.7143 | A |
| 28 | BICF2P1382559           | 20575628 | A | 0.75 | 0.5    | C |
| 28 | TIGRP2P358599_rs8688213 | 20585248 | 0 | 0    | 0      | A |
| 28 | BICF2P547199            | 20599206 | G | 0.5  | 0.7857 | A |
| 28 | BICF2P151042            | 20618559 | A | 1    | 1      | G |
| 28 | BICF2P1025459           | 20631762 | G | 1    | 1      | A |
| 28 | BICF2P1039992           | 20643320 | G | 0.5  | 0.7857 | A |
| 28 | BICF2P296185            | 20662029 | G | 0.25 | 0.2857 | A |
| 28 | BICF2S2415907           | 20665138 | A | 0.5  | 0.2143 | C |
| 28 | BICF2S23310821          | 20673623 | A | 0.75 | 0.5    | C |
| 28 | BICF2S23515285          | 20688173 | G | 0.5  | 0.2143 | A |
| 28 | BICF2P1002930           | 20689663 | G | 0.25 | 0.2857 | A |
| 28 | BICF2P1329045           | 20702291 | C | 0    | 0      | A |
| 28 | BICF2P657238            | 20713093 | A | 0.25 | 0.2857 | G |
| 28 | BICF2P1423714           | 20728153 | G | 0.75 | 0.5    | A |
| 28 | BICF2P1028541           | 20741347 | G | 0.75 | 0.5    | A |
| 28 | BICF2P11224             | 20750103 | C | 1    | 1      | A |
| 28 | BICF2P868022            | 20782442 | 0 | 0    | 0      | A |
| 28 | BICF2G630272350         | 20797406 | A | 0    | 0      | G |
| 28 | BICF2G630272300         | 20823913 | A | 0    | 0      | C |
| 28 | TIGRP2P358607_rs9100788 | 20831462 | 0 | 0    | 0      | G |
| 28 | BICF2G630272278         | 20839547 | A | 0.75 | 0.7143 | G |
| 28 | BICF2G630272255         | 20850684 | G | 0.25 | 0.2857 | A |
| 28 | BICF2S23512107          | 20866099 | A | 0.5  | 0.7857 | G |
| 28 | BICF2S23118671          | 20882024 | G | 0.5  | 0.2143 | A |
| 28 | TIGRP2P358610_rs8786829 | 20886665 | 0 | 0    | 0      | A |
| 28 | BICF2S2357008           | 20896853 | G | 0.25 | 0.2857 | A |
| 28 | BICF2G630272223         | 20914291 | A | 0    | 0      | G |
| 28 | BICF2G630272208         | 20928039 | A | 0.75 | 0.5    | G |
| 28 | BICF2S2415449           | 20928993 | A | 0.25 | 0.5    | G |

|    |                         |          |   |      |        |   |
|----|-------------------------|----------|---|------|--------|---|
| 28 | BICF2G630272207         | 20930970 | G | 0.25 | 0.5    | A |
| 28 | BICF2G630272184         | 20943382 | A | 0.5  | 0.2143 | G |
| 28 | BICF2G630272176         | 20953125 | A | 0.75 | 0.5    | C |
| 28 | BICF2G630272169         | 20968335 | G | 0.75 | 0.7143 | A |
| 28 | BICF2G630272165         | 20976044 | G | 0.75 | 0.7143 | A |
| 28 | BICF2P1082079           | 20990595 | G | 0    | 0      | A |
| 28 | BICF2G630272145         | 20991002 | G | 0    | 0      | A |
| 28 | BICF2G630272116         | 21005650 | A | 0.75 | 0.7143 | T |
| 28 | BICF2G630272107         | 21029103 | A | 0.25 | 0.2857 | G |
| 28 | BICF2G630272104         | 21038123 | G | 0.25 | 0.2857 | A |
| 28 | BICF2G630272072         | 21049587 | A | 0.75 | 0.7143 | G |
| 28 | BICF2G630272065         | 21058687 | A | 0.75 | 0.7143 | G |
| 28 | BICF2G630272047         | 21068722 | G | 0.25 | 0.5    | A |
| 28 | BICF2G630272024         | 21081705 | A | 0.75 | 0.5    | G |
| 28 | BICF2S23325658          | 21103362 | C | 0.5  | 0.7857 | A |
| 28 | BICF2S22928725          | 21116376 | A | 0.25 | 0.5    | G |
| 28 | BICF2S23642570          | 21125597 | A | 0.25 | 0.5    | G |
| 28 | BICF2S2338284           | 21158689 | C | 0.25 | 0.5    | A |
| 28 | G1368f26S242            | 21183721 | A | 0.25 | 0.5    | G |
| 28 | BICF2S23736123          | 21211542 | A | 0.25 | 0.5    | C |
| 28 | BICF2S23152889          | 21226901 | A | 0.5  | 0.2143 | G |
| 28 | BICF2P828965            | 21234073 | 0 | 0    | 0      | A |
| 28 | BICF2S23159506          | 21250847 | A | 0.5  | 0.2143 | G |
| 28 | BICF2G630272013         | 21252183 | A | 0.25 | 0.2857 | G |
| 28 | BICF2S23020872          | 21269303 | 0 | 0    | 0      | G |
| 28 | BICF2S23332603          | 21286204 | A | 0    | 0      | G |
| 28 | BICF2P716962            | 21293807 | 0 | 0    | 0      | A |
| 28 | BICF2S23051521          | 21308214 | A | 0.25 | 0.2857 | G |
| 28 | BICF2S23712290          | 21314447 | G | 0    | 0      | A |
| 28 | TIGRP2P358619_rs8711115 | 21339947 | 0 | 0    | 0      | A |
| 28 | BICF2S23719325          | 21389422 | C | 0.25 | 0.25   | A |
| 28 | BICF2G630271999         | 21415396 | G | 0.25 | 0.2857 | A |
| 28 | BICF2S23435174          | 21425147 | G | 0    | 0      | A |
| 28 | BICF2S23710122          | 21436058 | A | 0.25 | 0.2857 | C |
| 28 | BICF2S23411105          | 21448019 | G | 0    | 0      | A |
| 28 | BICF2S2437154           | 21466823 | A | 0.25 | 0.2857 | G |
| 28 | BICF2S23113419          | 21478714 | A | 0    | 0      | C |
| 28 | BICF2G630271991         | 21490457 | C | 0.5  | 0.7857 | G |
| 28 | BICF2G630271966         | 21511250 | G | 0.5  | 0.7857 | A |
| 28 | BICF2S23712904          | 21520220 | G | 0.25 | 0.5    | A |
| 28 | BICF2G630271929         | 21529896 | G | 0.5  | 0.2143 | A |
| 28 | BICF2G630271921         | 21550748 | A | 0.75 | 0.5    | G |
| 28 | BICF2G630271917         | 21551647 | A | 0.75 | 0.5    | C |
| 28 | BICF2G630271908         | 21565968 | G | 0.75 | 0.5    | A |
| 28 | BICF2G630271888         | 21575844 | A | 0.75 | 0.5    | G |
| 28 | BICF2S23631389          | 21587091 | C | 0    | 0      | A |
| 28 | BICF2G630271853         | 21598546 | G | 0.5  | 0.2143 | A |

|    |                         |          |   |      |        |   |
|----|-------------------------|----------|---|------|--------|---|
| 28 | BICF2S23061281          | 21618399 | A | 0    | 0      | C |
| 28 | BICF2S23414639          | 21622171 | G | 0.25 | 0.2857 | A |
| 28 | BICF2S23722463          | 21632956 | G | 0    | 0      | A |
| 28 | BICF2S23011750          | 21651382 | G | 0    | 0      | A |
| 28 | BICF2G630271841         | 21657684 | G | 0.5  | 0.7857 | A |
| 28 | TIGRP2P358624_rs8802781 | 21669820 | 0 | 0    | 0      | G |
| 28 | BICF2G630271814         | 21677719 | G | 0.5  | 0.2143 | A |
| 28 | BICF2G630271774         | 21699367 | A | 0    | 0      | G |
| 28 | BICF2S2339932           | 21702990 | A | 0.5  | 0.7857 | C |
| 28 | BICF2G630271763         | 21712881 | G | 0.25 | 0.5    | A |
| 28 | BICF2S22939190          | 21725928 | G | 0.75 | 0.5    | A |
| 28 | BICF2P750619            | 21745917 | A | 0.25 | 0.5    | G |
| 28 | BICF2G630271723         | 21754663 | G | 0.25 | 0.5    | A |
| 28 | BICF2P15583             | 21764625 | A | 0.75 | 0.5    | G |
| 28 | BICF2G630271675         | 21770739 | A | 0.25 | 0.5    | G |
| 28 | BICF2G630271668         | 21783677 | C | 0.75 | 0.5    | A |
| 28 | BICF2G630271656         | 21803517 | G | 0.25 | 0.2857 | A |
| 28 | BICF2G630271644         | 21811200 | A | 0.25 | 0.2857 | G |
| 28 | BICF2P704802            | 21822941 | A | 0    | 0      | C |
| 28 | BICF2P677609            | 21825320 | G | 0    | 0      | A |
| 28 | BICF2G630271618         | 21837933 | G | 0.25 | 0.2857 | A |
| 28 | BICF2S23515065          | 21840353 | A | 0.25 | 0.2857 | G |
| 28 | BICF2G630271608         | 21855809 | A | 0.25 | 0.2857 | G |
| 28 | BICF2G630271598         | 21862419 | C | 0.25 | 0.2857 | A |
| 28 | BICF2G630271568         | 21873728 | A | 0.25 | 0.2857 | G |
| 28 | BICF2P1052049           | 21886408 | A | 0.25 | 0.2857 | G |
| 28 | BICF2G630271525         | 21896868 | G | 1    | 1      | A |
| 28 | BICF2G630271514         | 21910880 | A | 0.75 | 0.7143 | G |
| 28 | BICF2G630271505         | 21920985 | A | 0    | 0      | G |
| 28 | BICF2G630271482         | 21936584 | A | 0    | 0      | G |
| 28 | BICF2G630271471         | 21944096 | G | 0.75 | 0.7143 | A |
| 28 | BICF2G630271454         | 21962607 | A | 0.75 | 0.7143 | G |
| 28 | BICF2G630271450         | 21966150 | G | 0    | 0      | A |
| 28 | BICF2G630271428         | 21978445 | A | 0.75 | 0.7143 | C |
| 28 | BICF2G630271391         | 21990642 | G | 0.75 | 0.7143 | A |
| 28 | BICF2P1014403           | 22001151 | A | 0.75 | 0.7143 | G |
| 28 | BICF2P475651            | 22013688 | A | 0.75 | 0.7143 | G |
| 28 | BICF2P1455226           | 22023991 | A | 0.75 | 0.7143 | G |
| 28 | BICF2P165070            | 22036263 | 0 | 0    | 0      | G |
| 28 | TIGRP2P358632_rs9060839 | 22054546 | 0 | 0    | 0      | A |
| 28 | BICF2P466875            | 22058475 | C | 0.75 | 0.7143 | A |
| 28 | BICF2S22951455          | 22070153 | A | 0.75 | 0.7143 | G |
| 28 | BICF2G630271364         | 22102203 | 0 | 0    | 0      | A |
| 28 | BICF2S23724253          | 22108420 | A | 0    | 0      | G |
| 28 | BICF2G630271362         | 22117865 | A | 0.75 | 0.7143 | C |
| 28 | BICF2P248412            | 22142136 | C | 0.75 | 0.7143 | A |
| 28 | BICF2P762629            | 22150477 | G | 0.75 | 0.7143 | A |

|    |                 |          |   |      |        |   |
|----|-----------------|----------|---|------|--------|---|
| 28 | BICF2G630271353 | 22161642 | G | 0.75 | 0.7143 | A |
| 28 | BICF2S23430844  | 22181189 | A | 0.75 | 0.7143 | C |
| 28 | BICF2G630271317 | 22187260 | A | 0.75 | 0.7143 | C |
| 28 | BICF2G630271283 | 22197806 | A | 0.25 | 0.2857 | G |
| 28 | BICF2G630271246 | 22210681 | A | 0.75 | 0.7143 | G |
| 28 | BICF2G630271221 | 22221618 | G | 0.75 | 0.7143 | A |
| 28 | BICF2P943264    | 22229508 | G | 0.25 | 0.2857 | A |
| 28 | BICF2P943271    | 22247601 | C | 0    | 0      | A |
| 28 | BICF2P1244093   | 22261334 | A | 0    | 0      | G |
| 28 | BICF2P95831     | 22263868 | A | 0    | 0      | C |
| 28 | BICF2G630271203 | 22272596 | A | 0.75 | 0.7143 | T |
| 28 | BICF2G630271191 | 22285733 | A | 0.75 | 0.7143 | C |
| 28 | BICF2G630271181 | 22292946 | A | 0    | 0      | C |
| 28 | BICF2G630271167 | 22310138 | A | 0.75 | 0.75   | G |
| 28 | BICF2G630271142 | 22333061 | G | 0.75 | 0.7143 | A |
| 28 | BICF2G630271125 | 22348297 | A | 0    | 0      | G |
| 28 | BICF2G630271101 | 22360446 | G | 0    | 0      | C |
| 28 | BICF2G630271100 | 22360552 | G | 0    | 0      | A |
| 28 | BICF2P1276779   | 22366920 | G | 0    | 0      | A |
| 28 | BICF2G630271084 | 22367407 | A | 0    | 0      | T |
| 28 | BICF2G630271081 | 22368464 | G | 0    | 0      | A |
| 28 | BICF2G630271061 | 22379689 | A | 0    | 0      | G |
| 28 | BICF2P930894    | 22397501 | 0 | 0    | 0      | A |
| 28 | BICF2P689737    | 22424525 | 0 | 0    | 0      | C |
| 28 | BICF2P280788    | 22430745 | G | 0    | 0      | A |
| 28 | BICF2P570143    | 22438751 | G | 0    | 0      | A |
| 28 | BICF2P196384    | 22470007 | G | 0    | 0      | A |
| 28 | BICF2P1246105   | 22477128 | G | 0    | 0      | A |
| 28 | BICF2P456063    | 22483988 | A | 0    | 0      | G |
| 28 | BICF2G630271032 | 22501414 | A | 0    | 0      | G |
| 28 | BICF2G630271022 | 22515895 | G | 0.25 | 0.5    | A |
| 28 | BICF2G630271015 | 22519113 | A | 0.25 | 0.5    | G |
| 28 | BICF2G630270990 | 22539135 | C | 0.5  | 0.4167 | A |
| 28 | BICF2G630270989 | 22540467 | A | 0    | 0      | G |
| 28 | BICF2G630270981 | 22545967 | G | 0.25 | 0.5    | A |
| 28 | BICF2G630270955 | 22559619 | G | 0.25 | 0.5    | A |
| 28 | BICF2G630270954 | 22559692 | A | 0    | 0      | G |
| 28 | BICF2G630270950 | 22561751 | A | 0.25 | 0.5    | T |
| 28 | BICF2P1107187   | 22563663 | 0 | 0    | 0      | A |
| 28 | BICF2G630270923 | 22590443 | A | 0    | 0      | G |
| 28 | BICF2G630270905 | 22599768 | A | 0    | 0      | G |
| 28 | BICF2G630270882 | 22607509 | A | 0    | 0      | G |
| 28 | BICF2G630270878 | 22609409 | G | 0    | 0      | A |
| 28 | BICF2G630270873 | 22634080 | A | 0    | 0      | G |
| 28 | BICF2P931791    | 22656255 | 0 | 0    | 0      | A |
| 28 | BICF2P780633    | 22675614 | G | 1    | 1      | A |
| 28 | BICF2G630270864 | 22675949 | A | 1    | 1      | G |

|    |                 |          |   |      |     |   |
|----|-----------------|----------|---|------|-----|---|
| 28 | BICF2G630270858 | 22681774 | G | 0.75 | 0.5 | A |
| 28 | BICF2P1380222   | 22689875 | A | 0.25 | 0.5 | G |
| 28 | BICF2G630270834 | 22690183 | G | 0.75 | 0.5 | A |
| 28 | BICF2G630270812 | 22701984 | G | 0.75 | 0.5 | A |
| 28 | BICF2G630270786 | 22721432 | A | 0.75 | 0.5 | G |
| 28 | BICF2G630270780 | 22724577 | G | 0.75 | 0.5 | A |
| 28 | BICF2P151813    | 22751701 | G | 0.75 | 0.5 | A |
| 28 | BICF2P1177495   | 22764469 | G | 0    | 0   | A |
| 28 | BICF2P1437113   | 22783254 | A | 0    | 0.5 | G |
| 28 | BICF2G630270753 | 22794504 | A | 0    | 0   | T |
| 28 | BICF2P477926    | 22803416 | C | 0    | 0   | A |
| 28 | BICF2P163586    | 22811934 | G | 0    | 0   | A |
| 28 | BICF2G630270723 | 22823215 | C | 0.75 | 0.5 | A |
| 28 | BICF2G630270710 | 22828823 | A | 0.25 | 0.5 | G |
| 28 | BICF2G630270704 | 22839061 | A | 0.25 | 0.5 | G |
| 28 | BICF2G630270691 | 22866203 | G | 0    | 0   | A |
| 28 | BICF2G630270685 | 22874819 | G | 1    | 1   | A |
| 28 | BICF2G630270677 | 22886363 | C | 1    | 1   | A |
| 28 | BICF2S2308630   | 22930617 | C | 0.25 | 0.5 | G |
| 28 | BICF2S23030814  | 22934397 | G | 0    | 0   | A |
| 28 | BICF2G630270648 | 22943841 | G | 0    | 0   | A |
| 28 | BICF2S23422371  | 22959103 | A | 1    | 1   | C |
| 28 | BICF2G630270622 | 22973197 | G | 1    | 1   | A |
| 28 | BICF2P159642    | 22987830 | C | 0    | 0   | A |
| 28 | BICF2S2362158   | 22995393 | G | 0.25 | 0.5 | A |
| 28 | BICF2P1038538   | 23001743 | A | 0    | 0   | G |
| 28 | BICF2P420630    | 23013453 | G | 0    | 0   | A |
| 28 | BICF2G630270610 | 23023710 | G | 0.25 | 0.5 | C |
| 28 | BICF2G630270607 | 23037705 | G | 0.75 | 0.5 | A |
| 28 | BICF2G630270583 | 23056312 | G | 0.75 | 0.5 | A |
| 28 | BICF2S23660782  | 23078818 | 0 | 0    | 0   | T |
| 28 | BICF2S23316418  | 23090857 | A | 0    | 0   | G |
| 28 | BICF2G630270579 | 23102979 | A | 0    | 0   | G |
| 28 | BICF2G630270576 | 23108423 | G | 0.25 | 0.5 | A |
| 28 | BICF2P565063    | 23117422 | G | 0.25 | 0.5 | A |
| 28 | BICF2G630270545 | 23133944 | A | 0    | 0   | G |
| 28 | BICF2P884654    | 23143262 | G | 0.25 | 0.5 | A |
| 28 | BICF2G630270530 | 23151867 | A | 0    | 0   | T |
| 28 | BICF2G630270514 | 23169135 | G | 0.75 | 0.5 | A |
| 28 | BICF2G630270500 | 23177224 | A | 0.25 | 0.5 | G |
| 28 | BICF2G630270491 | 23192425 | G | 0.25 | 0.5 | A |
| 28 | BICF2G630270489 | 23198565 | G | 0    | 0   | A |
| 28 | BICF2G630270476 | 23207852 | A | 0    | 0   | G |
| 28 | BICF2G630270472 | 23219855 | G | 0.75 | 0.5 | A |
| 28 | BICF2G630270465 | 23237259 | A | 0    | 0   | G |
| 28 | BICF2G630270464 | 23250405 | G | 0    | 0   | A |
| 28 | BICF2G630270454 | 23262099 | C | 0    | 0   | A |

|    |                         |          |   |      |     |   |
|----|-------------------------|----------|---|------|-----|---|
| 28 | BICF2P49876             | 23282087 | G | 0    | 0   | A |
| 28 | BICF2P248390            | 23293899 | C | 0.75 | 0.5 | G |
| 28 | BICF2P866757            | 23299686 | G | 0.75 | 0.5 | A |
| 28 | BICF2P227084            | 23315412 | 0 | 0    | 0   | G |
| 28 | BICF2G630270450         | 23339732 | A | 0    | 0   | G |
| 28 | BICF2G630270440         | 23351427 | A | 0    | 0   | G |
| 28 | BICF2P451670            | 23366386 | C | 0.75 | 0.5 | A |
| 28 | TIGRP2P358650_rs8939540 | 23368347 | 0 | 0    | 0   | A |
| 28 | BICF2G630270423         | 23390010 | A | 0    | 0   | G |
| 28 | BICF2G630270399         | 23394284 | G | 0    | 0   | A |
| 28 | BICF2P88462             | 23405918 | G | 0.75 | 0.5 | A |
| 28 | BICF2G630270373         | 23415991 | C | 0.75 | 0.5 | A |
| 28 | BICF2G630270355         | 23441729 | A | 0    | 0   | G |
| 28 | BICF2P1376023           | 23460700 | G | 0.75 | 0.5 | A |
| 28 | BICF2G630270336         | 23476582 | A | 0    | 0   | G |
| 28 | BICF2G630270323         | 23489682 | G | 0    | 0   | A |
| 28 | BICF2G630270313         | 23497732 | A | 0    | 0   | G |
| 28 | BICF2S23221871          | 23512133 | A | 0.75 | 0.5 | C |
| 28 | BICF2G630270297         | 23524462 | G | 0    | 0   | A |
| 28 | BICF2P824563            | 23529186 | A | 0    | 0   | G |
| 28 | BICF2P698353            | 23535689 | A | 0.75 | 0.5 | C |
| 28 | BICF2G630270292         | 23551482 | A | 0.75 | 0.5 | G |
| 28 | BICF2G630270284         | 23559951 | G | 0    | 0   | A |
| 28 | BICF2G630270280         | 23564139 | A | 0.75 | 0.5 | G |
| 28 | BICF2P1453257           | 23581408 | A | 0    | 0   | C |
| 28 | BICF2G630270244         | 23591839 | A | 0    | 0   | G |
| 28 | BICF2G630270231         | 23605482 | A | 0    | 0   | G |
| 28 | BICF2P511045            | 23609657 | G | 0    | 0   | A |
| 28 | BICF2G630270227         | 23627187 | C | 0    | 0   | A |
| 28 | BICF2G630270223         | 23633283 | A | 1    | 1   | G |
| 28 | BICF2G630270206         | 23652227 | G | 0    | 0   | A |
| 28 | BICF2S2319559           | 23658662 | A | 0    | 0   | G |
| 28 | BICF2G630270172         | 23669636 | A | 0    | 0   | G |
| 28 | BICF2G630270148         | 23678666 | G | 0    | 0   | A |
| 28 | BICF2S2362382           | 23695005 | G | 0    | 0   | A |
| 28 | BICF2G630270137         | 23701665 | C | 0.25 | 0.5 | G |
| 28 | BICF2P566828            | 23719873 | A | 0    | 0   | G |
| 28 | BICF2G630270116         | 23720414 | A | 0.75 | 0.5 | G |
| 28 | BICF2P553778            | 23725984 | C | 0.25 | 0.5 | A |
| 28 | BICF2G630270076         | 23740669 | A | 0    | 0   | G |
| 28 | BICF2P666917            | 23748170 | C | 0    | 0   | A |
| 28 | BICF2S23731030          | 23759341 | A | 0    | 0   | C |
| 28 | BICF2G630270053         | 23764479 | G | 0.25 | 0.5 | A |
| 28 | BICF2G630270031         | 23771742 | A | 0.25 | 0.5 | G |
| 28 | BICF2G630270020         | 23783110 | A | 0    | 0   | G |
| 28 | BICF2G630269974         | 23797097 | G | 0    | 0   | A |
| 28 | BICF2G630269965         | 23805426 | G | 0    | 0   | A |



|    |                         |          |   |      |        |   |
|----|-------------------------|----------|---|------|--------|---|
| 28 | BICF2G630269955         | 23810896 | G | 0    | 0      | A |
| 28 | BICF2G630269937         | 23820362 | G | 0.75 | 0.5    | A |
| 28 | BICF2G630269911         | 23831790 | A | 0.75 | 0.5    | C |
| 28 | BICF2G630269882         | 23842590 | A | 0.75 | 0.5    | C |
| 28 | BICF2G630269871         | 23851913 | G | 0.75 | 0.5    | A |
| 28 | BICF2P611139            | 23883363 | 0 | 0    | 0      | A |
| 28 | BICF2P791590            | 23885925 | 0 | 0    | 0      | C |
| 28 | BICF2G630269861         | 23907523 | C | 0    | 0      | A |
| 28 | BICF2G630269859         | 23916412 | C | 0    | 0      | A |
| 28 | BICF2G630269848         | 23928655 | A | 1    | 1      | G |
| 28 | BICF2G630269841         | 23931970 | A | 1    | 1      | G |
| 28 | BICF2G630269811         | 23943354 | A | 0    | 0      | G |
| 28 | BICF2P1050594           | 23957610 | A | 1    | 1      | G |
| 28 | BICF2S23739302          | 23959518 | A | 1    | 1      | G |
| 28 | BICF2G630269777         | 23967598 | A | 0    | 0      | G |
| 28 | BICF2G630269773         | 23972501 | A | 0    | 0      | G |
| 28 | BICF2S2295143           | 23979442 | C | 0    | 0      | A |
| 28 | BICF2G630269769         | 23989774 | G | 0    | 0      | A |
| 28 | BICF2G630269751         | 24006551 | A | 0    | 0      | G |
| 28 | BICF2G630269745         | 24015529 | G | 0    | 0      | A |
| 28 | TIGRP2P358665_rs8644548 | 24029161 | 0 | 0    | 0      | G |
| 28 | BICF2G630269723         | 24036338 | G | 0    | 0      | A |
| 28 | BICF2G630269695         | 24051573 | G | 0.25 | 0.5    | A |
| 28 | BICF2G630269688         | 24061336 | A | 0    | 0      | G |
| 28 | BICF2P1185683           | 24071542 | A | 0    | 0      | G |
| 28 | BICF2G630269665         | 24087830 | C | 0    | 0      | A |
| 28 | BICF2G630269645         | 24107093 | G | 0    | 0      | A |
| 28 | BICF2G630269626         | 24116036 | G | 0.25 | 0.5    | A |
| 28 | BICF2G630269614         | 24127015 | A | 0    | 0      | G |
| 28 | BICF2G630269611         | 24147709 | A | 0    | 0      | G |
| 28 | BICF2G630269598         | 24160446 | G | 0    | 0      | A |
| 28 | BICF2P1436056           | 24174510 | 0 | 0    | 0      | G |
| 28 | BICF2S23648419          | 24203986 | A | 0    | 0      | G |
| 28 | BICF2G630269575         | 24211031 | A | 0    | 0      | G |
| 28 | BICF2G630269538         | 24226031 | A | 0    | 0      | G |
| 28 | BICF2G630269524         | 24230536 | G | 0.75 | 0.5    | A |
| 28 | BICF2S23735820          | 24246698 | A | 0    | 0      | G |
| 28 | BICF2G630269480         | 24263620 | G | 0.25 | 0.4286 | A |
| 28 | BICF2G630269474         | 24271505 | A | 0.75 | 0.5    | C |
| 28 | BICF2G630269459         | 24283754 | C | 0.25 | 0.5    | A |
| 28 | BICF2G630269454         | 24291736 | A | 0.25 | 0.5    | G |
| 28 | BICF2P1315863           | 24301239 | C | 0.75 | 0.5    | A |
| 28 | BICF2G630269441         | 24308268 | G | 0    | 0      | A |
| 28 | BICF2G630269430         | 24322491 | G | 0.75 | 0.5    | A |
| 28 | BICF2G630269424         | 24326475 | A | 0    | 0      | G |
| 28 | BICF2G630269420         | 24339141 | A | 0    | 0      | G |
| 28 | BICF2G630269418         | 24353635 | A | 1    | 1      | C |

|    |                 |          |   |      |     |   |
|----|-----------------|----------|---|------|-----|---|
| 28 | BICF2G630269393 | 24368282 | A | 0.25 | 0.5 | G |
| 28 | BICF2G630269388 | 24372226 | A | 0.25 | 0.5 | G |
| 28 | BICF2G630269381 | 24384087 | G | 1    | 1   | A |
| 28 | BICF2S2299921   | 24394415 | A | 0.75 | 0.5 | C |
| 28 | BICF2P1311409   | 24407666 | A | 0.75 | 0.5 | G |
| 28 | BICF2G630269365 | 24416220 | A | 0.25 | 0.5 | T |
| 28 | BICF2P457921    | 24430467 | A | 0    | 0   | G |
| 28 | BICF2G630269344 | 24437536 | G | 0    | 0   | A |
| 28 | BICF2S23619735  | 24451932 | 0 | 0    | 0   | A |
| 28 | BICF2P1344063   | 24469565 | 0 | 0    | 0   | G |
| 28 | BICF2S23237011  | 24476133 | G | 0    | 0   | A |
| 28 | BICF2G630269340 | 24484685 | G | 0    | 0   | A |
| 28 | BICF2S23640208  | 24496648 | A | 0    | 0   | G |
| 28 | BICF2S23259280  | 24507206 | 0 | 0    | 0   | G |
| 28 | BICF2G630269333 | 24508184 | A | 0    | 0   | G |
| 28 | BICF2G630269322 | 24517297 | G | 0    | 0   | A |
| 28 | BICF2G630269321 | 24518294 | C | 0    | 0   | A |
| 28 | BICF2G630269308 | 24546060 | A | 0    | 0   | G |
| 28 | BICF2G630269296 | 24552730 | A | 0    | 0   | G |
| 28 | BICF2G630269282 | 24567030 | G | 0.25 | 0.5 | A |
| 28 | BICF2G630269266 | 24577050 | A | 0    | 0   | G |
| 28 | BICF2G630269258 | 24589975 | 0 | 0    | 0   | A |
| 28 | BICF2G630269255 | 24606766 | A | 0.75 | 0.5 | G |
| 28 | BICF2G630269254 | 24622790 | A | 0    | 0   | G |
| 28 | BICF2S2338553   | 24638344 | G | 0    | 0   | A |
| 28 | BICF2P5540      | 24654566 | 0 | 0    | 0   | G |
| 28 | BICF2G630269248 | 24658137 | A | 0    | 0   | G |
| 28 | BICF2G630269241 | 24667624 | G | 0.25 | 0.5 | A |
| 28 | BICF2G630269232 | 24684495 | C | 0    | 0   | A |
| 28 | BICF2G630269224 | 24692905 | A | 0.75 | 0.5 | G |
| 28 | BICF2G630269212 | 24698833 | G | 0    | 0   | A |
| 28 | BICF2G630269202 | 24703813 | C | 0    | 0   | A |
| 28 | BICF2P142560    | 24717355 | A | 0    | 0   | G |
| 28 | BICF2G630269157 | 24727734 | G | 0.25 | 0.5 | A |
| 28 | BICF2S23034462  | 24741993 | A | 0    | 0   | G |
| 28 | BICF2P285442    | 24753238 | G | 0.25 | 0.5 | A |
| 28 | BICF2G630269108 | 24761663 | A | 0.75 | 0.5 | G |
| 28 | BICF2G630269080 | 24781688 | 0 | 0    | 0   | T |
| 28 | BICF2G630269067 | 24789749 | A | 1    | 1   | G |
| 28 | BICF2G630269062 | 24794682 | A | 0.25 | 0.5 | G |
| 28 | BICF2G630269049 | 24807368 | G | 0    | 0   | A |
| 28 | BICF2G630269046 | 24817869 | A | 0    | 0   | G |
| 28 | BICF2G630269045 | 24819808 | A | 0.25 | 0.5 | C |
| 28 | BICF2P1256797   | 24836111 | A | 0    | 0   | C |
| 28 | BICF2P928818    | 24838807 | G | 0.75 | 0.5 | A |
| 28 | BICF2P367419    | 24845929 | A | 0    | 0   | G |
| 28 | BICF2P1458428   | 24857142 | 0 | 0    | 0   | G |

|    |                         |          |   |      |        |   |
|----|-------------------------|----------|---|------|--------|---|
| 28 | BICF2G630269027         | 24869962 | G | 0    | 0      | A |
| 28 | BICF2G630269023         | 24874642 | A | 0    | 0      | G |
| 28 | BICF2P279733            | 24886050 | 0 | 0    | 0      | A |
| 28 | BICF2G630269011         | 24899982 | G | 0    | 0      | A |
| 28 | BICF2G630269002         | 24910067 | C | 0    | 0      | A |
| 28 | BICF2G630268980         | 24920581 | A | 0    | 0      | G |
| 28 | BICF2G630268971         | 24934252 | G | 0    | 0      | A |
| 28 | BICF2G630268954         | 24951639 | A | 0    | 0      | G |
| 28 | BICF2P246719            | 24965091 | A | 0    | 0      | G |
| 28 | BICF2G630268933         | 24974857 | G | 0.75 | 0.5    | A |
| 28 | BICF2G630268925         | 24987789 | A | 0.75 | 0.5    | G |
| 28 | BICF2G630268921         | 24989882 | A | 0.75 | 0.5    | C |
| 28 | BICF2P712865            | 25006818 | C | 0.75 | 0.5    | A |
| 28 | BICF2P149638            | 25023467 | G | 0.5  | 0.2143 | A |
| 28 | BICF2G630268912         | 25034623 | A | 0.75 | 0.5    | G |
| 28 | BICF2G630268905         | 25038710 | C | 0.75 | 0.5    | A |
| 28 | BICF2G630268885         | 25052425 | G | 0.75 | 0.5    | A |
| 28 | BICF2P636676            | 25059980 | G | 0    | 0      | A |
| 28 | BICF2P767578            | 25064322 | A | 0    | 0      | C |
| 28 | BICF2P571630            | 25073131 | A | 0.25 | 0.5    | G |
| 28 | BICF2P1047234           | 25089476 | A | 0.25 | 0.5    | G |
| 28 | BICF2S23258177          | 25093182 | 0 | 0    | 0      | C |
| 28 | TIGRP2P358691_rs8878979 | 25107675 | G | 0.25 | 0.2857 | A |
| 28 | BICF2S23447609          | 25116942 | G | 0.75 | 0.5    | A |
| 28 | BICF2P769552            | 25128300 | G | 0.75 | 0.5    | A |
| 28 | BICF2P1415702           | 25140973 | G | 0.75 | 0.5    | A |
| 28 | BICF2P1423416           | 25163479 | A | 0.25 | 0.2857 | C |
| 28 | BICF2P187983            | 25184348 | G | 0.25 | 0.2857 | A |
| 28 | BICF2S23232119          | 25194094 | A | 0.75 | 0.5    | G |
| 28 | BICF2P294965            | 25197824 | A | 0.75 | 0.5    | C |
| 28 | TIGRP2P358728_rs8511679 | 25212108 | A | 0    | 0      | G |
| 28 | BICF2P1041022           | 25231008 | A | 0.25 | 0.2857 | G |
| 28 | BICF2G630268862         | 25263868 | G | 0.25 | 0.25   | A |
| 28 | BICF2G630268850         | 25282280 | A | 0.25 | 0.2857 | G |
| 28 | BICF2G630268839         | 25319056 | G | 0.25 | 0.2857 | A |
| 28 | BICF2G630268834         | 25333001 | A | 0.25 | 0.2857 | G |
| 28 | BICF2P623010            | 25345421 | A | 0.25 | 0.2857 | G |
| 28 | BICF2S22947252          | 25363433 | A | 0    | 0      | G |
| 28 | BICF2G630268824         | 25372844 | G | 0.25 | 0.5    | A |
| 28 | TIGRP2P358748_rs8498932 | 25387774 | A | 0    | 0      | G |
| 28 | BICF2S23342389          | 25395274 | A | 0    | 0      | G |
| 28 | BICF2P425327            | 25404785 | 0 | 0    | 0      | C |
| 28 | BICF2P564307            | 25432695 | 0 | 0    | 0      | A |
| 28 | BICF2P809832            | 25446107 | 0 | 0    | 0      | C |
| 28 | TIGRP2P358753_rs9056055 | 25460500 | 0 | 0    | 0      | C |
| 28 | BICF2S23737690          | 25478215 | G | 0    | 0      | A |
| 28 | BICF2S22946651          | 25487216 | G | 0    | 0      | A |

|    |                         |          |   |      |        |   |
|----|-------------------------|----------|---|------|--------|---|
| 28 | BICF2P1376996           | 25506319 | A | 0    | 0      | G |
| 28 | BICF2P1251813           | 25511265 | A | 0    | 0      | C |
| 28 | BICF2S22943373          | 25520347 | G | 0    | 0      | A |
| 28 | BICF2P1367127           | 25533936 | A | 0    | 0      | G |
| 28 | BICF2P1253063           | 25550602 | A | 0    | 0      | C |
| 28 | TIGRP2P358795_rs8931248 | 25554627 | C | 0    | 0      | A |
| 28 | BICF2S23452743          | 25579429 | A | 0    | 0      | G |
| 28 | BICF2S23640515          | 25588371 | A | 0    | 0      | G |
| 28 | BICF2S23318063          | 25601333 | G | 0    | 0      | A |
| 28 | BICF2P629428            | 25620884 | G | 0.75 | 0.7143 | C |
| 28 | BICF2P503734            | 25627113 | 0 | 0    | 0      | G |
| 28 | BICF2S23656440          | 25641648 | C | 0    | 0      | A |
| 28 | BICF2S23443416          | 25649819 | A | 0    | 0      | G |
| 28 | BICF2S23644817          | 25661721 | G | 1    | 1      | A |
| 28 | BICF2P70536             | 25670988 | G | 1    | 1      | C |
| 28 | BICF2P208157            | 25704590 | A | 1    | 1      | G |
| 28 | BICF2G630268786         | 25714748 | A | 1    | 1      | G |
| 28 | BICF2P976213            | 25718404 | A | 0.75 | 0.5    | G |
| 28 | TIGRP2P358834_rs9189959 | 25729113 | 0 | 0    | 0      | G |
| 28 | BICF2P96890             | 25758023 | 0 | 0    | 0      | A |
| 28 | TIGRP2P358843_rs8845915 | 25764225 | A | 0.25 | 0.5    | G |
| 28 | BICF2G630268784         | 25768243 | A | 1    | 1      | G |
| 28 | BICF2G630268777         | 25777665 | A | 0.75 | 0.5    | G |
| 28 | BICF2G630268776         | 25783475 | G | 0.75 | 0.5    | A |
| 28 | BICF2G630268762         | 25795304 | A | 1    | 1      | G |
| 28 | BICF2G630268735         | 25815358 | A | 0.75 | 0.5    | C |
| 28 | BICF2S2291001           | 25827451 | G | 0.75 | 0.5    | A |
| 28 | BICF2G630268727         | 25832821 | A | 0.75 | 0.5    | G |
| 28 | BICF2G630268693         | 25858347 | A | 0    | 0      | C |
| 28 | BICF2S23611292          | 25864793 | 0 | 0    | 0      | G |
| 28 | BICF2P938700            | 25882457 | 0 | 0    | 0      | A |
| 28 | BICF2G630268686         | 25891851 | A | 0    | 0      | C |
| 28 | TIGRP2P358848_rs8889810 | 25904590 | G | 1    | 1      | A |
| 28 | BICF2S23028269          | 25913787 | G | 0    | 0      | A |
| 28 | BICF2P215820            | 25925940 | A | 0.25 | 0.5    | C |
| 28 | BICF2P549772            | 25933225 | G | 0    | 0      | A |
| 28 | BICF2P1293541           | 25951277 | A | 0    | 0      | C |
| 28 | BICF2P475093            | 25957101 | A | 0    | 0      | C |
| 28 | BICF2S23764832          | 25972101 | A | 0.25 | 0.5    | G |
| 28 | BICF2G630268685         | 25985221 | A | 0.25 | 0.5    | C |
| 28 | BICF2G630268682         | 25998267 | G | 0.75 | 0.5    | A |
| 28 | BICF2P1173685           | 26004699 | G | 0    | 0      | A |
| 28 | BICF2G630268656         | 26021048 | A | 0.5  | 0.2143 | G |
| 28 | BICF2G630268655         | 26021877 | A | 0.5  | 0.2143 | G |
| 28 | BICF2G630268647         | 26025968 | C | 0.5  | 0.2143 | A |
| 28 | BICF2G630268606         | 26057711 | G | 0.5  | 0.2143 | A |
| 28 | BICF2G630268604         | 26059243 | G | 0.5  | 0.2143 | A |

|    |                         |          |   |      |        |   |
|----|-------------------------|----------|---|------|--------|---|
| 28 | BICF2G630268599         | 26061835 | A | 0.5  | 0.2143 | G |
| 28 | BICF2G630268581         | 26071013 | G | 0.5  | 0.2143 | A |
| 28 | BICF2P303963            | 26088259 | G | 0.5  | 0.2143 | A |
| 28 | BICF2G630268537         | 26098340 | C | 0.25 | 0.2857 | A |
| 28 | BICF2G630268524         | 26107669 | A | 0    | 0      | G |
| 28 | BICF2G630268521         | 26108139 | G | 0    | 0      | A |
| 28 | TIGRP2P358895_rs9198758 | 26125336 | C | 0    | 0      | A |
| 28 | BICF2G630268503         | 26132886 | A | 0    | 0      | G |
| 28 | TIGRP2P358898_rs8790111 | 26145632 | G | 0.25 | 0.2857 | A |
| 28 | BICF2P922809            | 26153207 | C | 0.25 | 0.2857 | A |
| 28 | BICF2G630268476         | 26162650 | A | 0    | 0      | G |
| 28 | BICF2G630268463         | 26170579 | G | 0    | 0      | A |
| 28 | TIGRP2P358906_rs9248946 | 26175974 | A | 0    | 0      | G |
| 28 | BICF2P749640            | 26191281 | A | 1    | 1      | G |
| 28 | BICF2G630268418         | 26193470 | A | 1    | 1      | G |
| 28 | BICF2G630268405         | 26197606 | A | 1    | 1      | G |
| 28 | BICF2P644047            | 26214599 | G | 0    | 0      | A |
| 28 | BICF2G630268386         | 26220226 | G | 0    | 0      | A |
| 28 | BICF2G630268373         | 26231795 | A | 0    | 0      | G |
| 28 | BICF2P1229445           | 26246802 | A | 0    | 0      | C |
| 28 | BICF2G630268361         | 26256531 | A | 0.75 | 0.7143 | G |
| 28 | BICF2G630268357         | 26266475 | G | 0.75 | 0.7143 | A |
| 28 | BICF2G630268345         | 26282581 | A | 0.75 | 0.7143 | G |
| 28 | BICF2S23054430          | 26292471 | A | 0    | 0      | G |
| 28 | BICF2S22932740          | 26305630 | A | 0    | 0      | G |
| 28 | BICF2G630268319         | 26313208 | G | 0.75 | 0.7143 | A |
| 28 | BICF2G630268305         | 26318152 | G | 0.75 | 0.7143 | A |
| 28 | BICF2G630268277         | 26329426 | A | 0.5  | 0.2857 | G |
| 28 | BICF2S23248110          | 26339713 | A | 0.5  | 0.2143 | C |
| 28 | BICF2S24110940          | 26349544 | A | 0.25 | 0.5    | G |
| 28 | BICF2P245954            | 26362096 | G | 0    | 0      | A |
| 28 | BICF2P674000            | 26371304 | C | 0.25 | 0.5    | A |
| 28 | BICF2G630268258         | 26385520 | G | 0.25 | 0.2857 | A |
| 28 | BICF2G630268251         | 26394769 | 0 | 0    | 0      | G |
| 28 | BICF2P781852            | 26410442 | A | 0.25 | 0.5    | G |
| 28 | BICF2G630268242         | 26418920 | A | 0    | 0      | G |
| 28 | BICF2P823273            | 26428813 | A | 0.75 | 0.5    | G |
| 28 | BICF2P293218            | 26441958 | G | 0.75 | 0.5    | A |
| 28 | BICF2S2348301           | 26452908 | A | 0.25 | 0.2857 | G |
| 28 | TIGRP2P358976_rs8784170 | 26467522 | G | 0.75 | 0.5    | A |
| 28 | BICF2P81124             | 26475654 | A | 0.75 | 0.5    | G |
| 28 | BICF2P338375            | 26493816 | A | 0.75 | 0.5    | C |
| 28 | BICF2G630268223         | 26496953 | G | 0.75 | 0.5    | A |
| 28 | BICF2G630268202         | 26512795 | A | 0.75 | 0.5    | G |
| 28 | BICF2G630268193         | 26521718 | A | 0.75 | 0.5    | C |
| 28 | BICF2G630268184         | 26531267 | 0 | 0    | 0      | A |
| 28 | BICF2P1110548           | 26572663 | 0 | 0    | 0      | A |

|    |                         |          |   |      |        |   |
|----|-------------------------|----------|---|------|--------|---|
| 28 | BICF2G630268171         | 26587067 | A | 0.25 | 0.2857 | G |
| 28 | BICF2G630268170         | 26589012 | A | 0.25 | 0.2857 | G |
| 28 | BICF2G630268162         | 26600702 | G | 0.25 | 0.2857 | A |
| 28 | BICF2P742105            | 26617939 | 0 | 0    | 0      | A |
| 28 | BICF2G630268157         | 26625193 | G | 0.25 | 0.2857 | A |
| 28 | BICF2G630268148         | 26644383 | A | 0    | 0      | G |
| 28 | BICF2G630268145         | 26646125 | G | 0.25 | 0.2857 | C |
| 28 | BICF2P328690            | 26646832 | G | 0.25 | 0.2857 | A |
| 28 | BICF2G630268144         | 26677208 | G | 0.75 | 0.5    | A |
| 28 | BICF2P394718            | 26683449 | A | 0.75 | 0.5    | C |
| 28 | BICF2S23539144          | 26700708 | G | 0.75 | 0.5    | A |
| 28 | BICF2P1406821           | 26703752 | A | 0.75 | 0.5    | G |
| 28 | BICF2P1171836           | 26705707 | C | 0.75 | 0.5    | A |
| 28 | BICF2P491364            | 26727320 | A | 0.25 | 0.2857 | G |
| 28 | BICF2P1444187           | 26738400 | A | 0.25 | 0.2857 | C |
| 28 | BICF2G630268122         | 26756149 | A | 0.25 | 0.2857 | G |
| 28 | BICF2G630268113         | 26760654 | A | 0.25 | 0.5    | G |
| 28 | BICF2P1294863           | 26775310 | A | 0.75 | 0.7143 | C |
| 28 | BICF2G630268092         | 26783624 | G | 0.75 | 0.7143 | A |
| 28 | BICF2G630268074         | 26799126 | A | 0.5  | 0.2143 | G |
| 28 | BICF2G630268062         | 26804101 | G | 0.75 | 0.5    | A |
| 28 | BICF2G630268056         | 26812490 | A | 0    | 0      | G |
| 28 | BICF2S23429826          | 26822971 | G | 0.25 | 0.2857 | A |
| 28 | BICF2G630268026         | 26832789 | A | 1    | 1      | G |
| 28 | BICF2G630267995         | 26853843 | G | 0.5  | 0.2143 | A |
| 28 | BICF2G630267938         | 26875258 | G | 1    | 1      | A |
| 28 | BICF2G630267931         | 26882400 | G | 1    | 1      | A |
| 28 | BICF2G630267915         | 26887718 | A | 0.5  | 0.2143 | G |
| 28 | BICF2S23653955          | 26909100 | 0 | 0    | 0      | G |
| 28 | TIGRP2P359036_rs9100300 | 26913753 | G | 0.5  | 0.7857 | A |
| 28 | BICF2G630267891         | 26932519 | A | 0    | 0      | G |
| 28 | BICF2P1247739           | 26971862 | G | 1    | 1      | A |
| 28 | BICF2G630267885         | 27000617 | A | 0    | 0      | C |
| 28 | BICF2G630267883         | 27003779 | G | 0    | 0      | A |
| 28 | BICF2G630267863         | 27021762 | A | 1    | 1      | G |
| 28 | BICF2G630267858         | 27030452 | A | 0    | 0      | G |
| 28 | BICF2G630267846         | 27041085 | A | 0    | 0      | G |
| 28 | BICF2P759711            | 27051625 | 0 | 0    | 0      | A |
| 28 | BICF2P206705            | 27063156 | 0 | 0    | 0      | G |
| 28 | BICF2S23516723          | 27073612 | 0 | 0    | 0      | G |
| 28 | BICF2G630267839         | 27083663 | A | 0    | 0      | C |
| 28 | BICF2S23511521          | 27100917 | 0 | 0    | 0      | G |
| 28 | BICF2P1225085           | 27111115 | A | 0    | 0      | G |
| 28 | BICF2G630267818         | 27126398 | A | 0    | 0      | C |
| 28 | BICF2G630267805         | 27142098 | G | 1    | 1      | A |
| 28 | BICF2G630267798         | 27150571 | G | 1    | 1      | A |
| 28 | BICF2G630267789         | 27159839 | A | 0    | 0      | G |

|    |                         |          |   |   |   |   |
|----|-------------------------|----------|---|---|---|---|
| 28 | BICF2P1237323           | 27177010 | G | 0 | 0 | A |
| 28 | BICF2G630267788         | 27203162 | G | 0 | 0 | A |
| 28 | BICF2G630267770         | 27214252 | A | 1 | 1 | C |
| 28 | BICF2G630267733         | 27230933 | C | 0 | 0 | A |
| 28 | BICF2G630267705         | 27242009 | A | 0 | 0 | G |
| 28 | BICF2G630267695         | 27248430 | A | 1 | 1 | G |
| 28 | BICF2G630267682         | 27260683 | A | 0 | 0 | G |
| 28 | BICF2G630267669         | 27268202 | G | 0 | 0 | A |
| 28 | BICF2G630267650         | 27282489 | G | 1 | 1 | A |
| 28 | BICF2P1318392           | 27290946 | A | 0 | 0 | G |
| 28 | BICF2G630267644         | 27295811 | C | 1 | 1 | G |
| 28 | BICF2P499665            | 27305098 | A | 0 | 0 | G |
| 28 | BICF2G630267598         | 27313168 | G | 0 | 0 | A |
| 28 | BICF2G630267588         | 27320562 | A | 0 | 0 | C |
| 28 | BICF2G630267583         | 27323719 | G | 0 | 0 | A |
| 28 | BICF2G630267578         | 27326031 | A | 0 | 0 | G |
| 28 | BICF2G630267541         | 27342734 | A | 1 | 1 | G |
| 28 | BICF2G630267533         | 27345468 | A | 1 | 1 | G |
| 28 | BICF2G630267531         | 27347275 | C | 1 | 1 | A |
| 28 | BICF2G630267520         | 27367623 | A | 1 | 1 | G |
| 28 | BICF2G630267504         | 27374422 | G | 1 | 1 | A |
| 28 | BICF2S23638592          | 27379046 | A | 1 | 1 | G |
| 28 | BICF2G630267501         | 27379257 | A | 0 | 0 | G |
| 28 | BICF2G630267498         | 27386508 | A | 0 | 0 | G |
| 28 | BICF2P1204714           | 27398146 | A | 0 | 0 | G |
| 28 | BICF2G630267482         | 27407804 | G | 0 | 0 | A |
| 28 | BICF2S23345766          | 27420322 | A | 1 | 1 | T |
| 28 | BICF2S2336816           | 27435196 | G | 1 | 1 | A |
| 28 | TIGRP2P359056_rs8654728 | 27440704 | 0 | 0 | 0 | G |
| 28 | BICF2P21102             | 27461011 | G | 0 | 0 | A |
| 28 | BICF2P1014367           | 27462517 | A | 0 | 0 | G |
| 28 | BICF2P832669            | 27466449 | G | 0 | 0 | A |
| 28 | BICF2P1380271           | 27483608 | A | 0 | 0 | G |
| 28 | BICF2P1380275           | 27484380 | A | 0 | 0 | G |
| 28 | BICF2S22959899          | 27489785 | A | 1 | 1 | C |
| 28 | BICF2P864470            | 27497451 | C | 0 | 0 | G |
| 28 | BICF2P716175            | 27510673 | G | 1 | 1 | C |
| 28 | BICF2S23643131          | 27521754 | A | 0 | 0 | G |
| 28 | BICF2P386250            | 27534708 | G | 1 | 1 | A |
| 28 | BICF2P323622            | 27535940 | G | 1 | 1 | A |
| 28 | BICF2P179175            | 27547106 | A | 1 | 1 | G |
| 28 | TIGRP2P359058_rs8792533 | 27559191 | 0 | 0 | 0 | G |
| 28 | BICF2P1035436           | 27576589 | 0 | 0 | 0 | A |
| 28 | BICF2S23453038          | 27616985 | G | 0 | 0 | A |
| 28 | BICF2P1296395           | 27628351 | A | 0 | 0 | C |
| 28 | BICF2P379834            | 27635748 | G | 0 | 0 | A |
| 28 | BICF2G630267464         | 27655562 | A | 0 | 0 | G |

|    |                         |          |   |   |   |   |
|----|-------------------------|----------|---|---|---|---|
| 28 | BICF2S23514464          | 27658395 | G | 0 | 0 | A |
| 28 | BICF2P1095026           | 27670658 | G | 0 | 0 | A |
| 28 | BICF2P202895            | 27684490 | 0 | 0 | 0 | G |
| 28 | BICF2G630267454         | 27699801 | A | 0 | 0 | G |
| 28 | BICF2G630267450         | 27704831 | A | 0 | 0 | G |
| 28 | BICF2S2364965           | 27720074 | A | 0 | 0 | G |
| 28 | BICF2P263376            | 27728347 | G | 0 | 0 | A |
| 28 | BICF2P1059290           | 27747365 | A | 0 | 0 | G |
| 28 | BICF2P1291694           | 27770930 | 0 | 0 | 0 | A |
| 28 | TIGRP2P359062_rs8799036 | 27776020 | 0 | 0 | 0 | C |
| 28 | BICF2P1359923           | 27787100 | G | 0 | 0 | A |
| 28 | G1369f41S177            | 27814512 | A | 0 | 0 | G |
| 28 | BICF2S2361397           | 27866673 | A | 1 | 1 | G |
| 28 | BICF2P622150            | 27882463 | 0 | 0 | 0 | G |
| 28 | BICF2P853497            | 27915721 | 0 | 0 | 0 | G |
| 28 | BICF2S23217197          | 27931693 | G | 1 | 1 | A |
| 28 | BICF2S23620686          | 27944789 | A | 0 | 0 | G |
| 28 | BICF2P259344            | 27957036 | 0 | 0 | 0 | G |
| 28 | BICF2S23753887          | 27977098 | G | 0 | 0 | A |
| 28 | TIGRP2P359067_rs9028069 | 27990417 | 0 | 0 | 0 | C |
| 28 | BICF2P604505            | 27998166 | 0 | 0 | 0 | A |
| 28 | BICF2P190127            | 28011880 | 0 | 0 | 0 | T |
| 28 | BICF2P920424            | 28036066 | G | 1 | 1 | A |
| 28 | BICF2P920426            | 28037920 | A | 1 | 1 | G |
| 28 | BICF2S23447579          | 28055739 | A | 1 | 1 | G |
| 28 | BICF2P609242            | 28060959 | G | 1 | 1 | A |
| 28 | BICF2P218150            | 28073505 | A | 1 | 1 | G |
| 28 | BICF2G630267435         | 28110956 | A | 0 | 0 | G |
| 28 | BICF2G630267409         | 28125226 | A | 0 | 0 | G |
| 28 | BICF2G630267398         | 28128638 | G | 0 | 0 | A |
| 28 | BICF2S23617225          | 28131791 | 0 | 0 | 0 | G |
| 28 | BICF2G630267377         | 28141522 | A | 0 | 0 | G |
| 28 | BICF2G630267353         | 28153633 | A | 0 | 0 | C |
| 28 | BICF2G630267329         | 28165262 | G | 0 | 0 | A |
| 28 | BICF2G630267314         | 28175480 | G | 0 | 0 | A |
| 28 | BICF2P475864            | 28197950 | G | 0 | 0 | A |
| 28 | BICF2G630267292         | 28206358 | C | 0 | 0 | A |
| 28 | BICF2G630267291         | 28210303 | A | 0 | 0 | G |
| 28 | BICF2G630267276         | 28228371 | G | 0 | 0 | A |
| 28 | BICF2G630267265         | 28240536 | A | 1 | 1 | G |
| 28 | BICF2G630267260         | 28244009 | G | 0 | 0 | A |
| 28 | TIGRP2P359068_rs8524449 | 28260815 | 0 | 0 | 0 | G |
| 28 | BICF2P1289598           | 28268420 | A | 0 | 0 | T |
| 28 | BICF2G630267254         | 28294415 | G | 0 | 0 | A |
| 28 | BICF2G630267247         | 28302817 | C | 0 | 0 | A |
| 28 | BICF2G630267224         | 28320220 | G | 0 | 0 | A |
| 28 | BICF2G630267218         | 28325351 | G | 0 | 0 | A |



|    |                         |          |   |      |        |   |
|----|-------------------------|----------|---|------|--------|---|
| 28 | BICF2G630267214         | 28338587 | A | 0    | 0      | G |
| 28 | BICF2G630267206         | 28346671 | G | 1    | 1      | A |
| 28 | BICF2G630267200         | 28348611 | A | 1    | 1      | C |
| 28 | BICF2P1065182           | 28368718 | A | 0    | 0      | G |
| 28 | BICF2P991177            | 28378324 | G | 0    | 0      | A |
| 28 | BICF2P1065869           | 28382362 | A | 0    | 0      | G |
| 28 | BICF2P1118451           | 28398914 | A | 0    | 0      | T |
| 28 | BICF2P1083775           | 28402634 | G | 0    | 0      | A |
| 28 | BICF2P505231            | 28412591 | A | 0    | 0      | G |
| 28 | BICF2P894666            | 28417467 | A | 0    | 0      | G |
| 28 | BICF2P204904            | 28424044 | A | 0    | 0      | G |
| 28 | TIGRP2P359074_rs8686822 | 28431163 | 0 | 0    | 0      | C |
| 28 | BICF2P814666            | 28439763 | A | 0    | 0      | G |
| 28 | BICF2P1324              | 28459769 | G | 0    | 0      | A |
| 28 | BICF2P1348357           | 28467824 | A | 0    | 0      | G |
| 28 | BICF2P386567            | 28474654 | G | 1    | 1      | A |
| 28 | BICF2S23912335          | 28486945 | A | 0    | 0      | G |
| 28 | BICF2P177126            | 28497090 | A | 0    | 0      | G |
| 28 | BICF2P619077            | 28512524 | 0 | 0    | 0      | C |
| 28 | BICF2P738469            | 28522197 | G | 0    | 0      | A |
| 28 | BICF2S23655666          | 28536852 | G | 0.5  | 0.2143 | A |
| 28 | BICF2P881412            | 28547068 | A | 0.25 | 0.5    | G |
| 28 | BICF2P778344            | 28556986 | G | 0    | 0      | A |
| 28 | TIGRP2P359090_rs8580380 | 28569501 | 0 | 0    | 0      | A |
| 28 | BICF2S23437890          | 28599985 | G | 0.25 | 0.5    | A |
| 28 | BICF2S23249364          | 28604359 | G | 1    | 1      | A |
| 28 | BICF2S23011729          | 28620651 | G | 0.5  | 0.2143 | A |
| 28 | BICF2S23027787          | 28625034 | G | 0.5  | 0.2143 | A |
| 28 | TIGRP2P359098_rs8991182 | 28637472 | 0 | 0    | 0      | G |
| 28 | TIGRP2P359104_rs8756293 | 28648750 | A | 0    | 0      | G |
| 28 | BICF2S23053102          | 28663421 | C | 0.25 | 0.5    | A |
| 28 | TIGRP2P359120_rs9192695 | 28691170 | A | 0    | 0      | G |
| 28 | BICF2P1075500           | 28697142 | G | 0    | 0      | A |
| 28 | BICF2P1042183           | 28700911 | G | 0    | 0      | A |
| 28 | BICF2P1060796           | 28709512 | A | 0    | 0      | G |
| 28 | BICF2P253430            | 28725967 | G | 0    | 0      | A |
| 28 | BICF2P961387            | 28727923 | A | 0    | 0      | G |
| 28 | BICF2S234569            | 28744262 | G | 0.75 | 0.5    | A |
| 28 | TIGRP2P359140_rs9183293 | 28754754 | A | 0    | 0      | G |
| 28 | BICF2P1300199           | 28762181 | G | 0    | 0      | A |
| 28 | BICF2P1300090           | 28764055 | G | 0.25 | 0.2857 | A |
| 28 | BICF2S23510617          | 28772172 | G | 0.5  | 0.2143 | A |
| 28 | BICF2S2447764           | 28779828 | G | 0.5  | 0.2143 | A |
| 28 | BICF2P183309            | 28784949 | A | 0    | 0      | G |
| 28 | BICF2S23732874          | 28802215 | A | 0    | 0      | G |
| 28 | BICF2P969081            | 28814877 | 0 | 0    | 0      | G |
| 28 | BICF2P297637            | 28836713 | G | 0.25 | 0.5    | A |

|    |                         |          |   |      |        |   |
|----|-------------------------|----------|---|------|--------|---|
| 28 | BICF2P1492527           | 28852461 | 0 | 0    | 0      | A |
| 28 | BICF2P955741            | 28873025 | 0 | 0    | 0      | G |
| 28 | BICF2P179984            | 28879342 | T | 0.25 | 0.5    | A |
| 28 | BICF2P474422            | 28895480 | 0 | 0    | 0      | C |
| 28 | G1370f15S145            | 28916394 | A | 0    | 0      | G |
| 28 | BICF2P517240            | 28922626 | C | 0    | 0.5    | A |
| 28 | BICF2G630267190         | 28944339 | T | 0    | 0      | A |
| 28 | BICF2P601702            | 28950254 | 0 | 0    | 0      | A |
| 28 | G1371f49S222            | 28996709 | 0 | 0    | 0      | G |
| 28 | BICF2G630267173         | 29029481 | A | 0    | 0      | G |
| 28 | BICF2G630267162         | 29046328 | A | 0.25 | 0.5    | C |
| 28 | TIGRP2P359172_rs9056273 | 29056798 | 0 | 0    | 0      | T |
| 28 | BICF2G630267152         | 29071152 | A | 0    | 0      | G |
| 28 | BICF2P1292038           | 29081082 | 0 | 0    | 0      | A |
| 28 | TIGRP2P359174_rs8780035 | 29103447 | A | 0.25 | 0.5    | C |
| 28 | BICF2P104065            | 29107022 | 0 | 0    | 0      | C |
| 28 | BICF2P198682            | 29128234 | G | 0    | 0.5    | A |
| 28 | BICF2P315909            | 29143901 | A | 0.25 | 0.5    | C |
| 28 | BICF2P752290            | 29173887 | 0 | 0    | 0      | A |
| 28 | BICF2P1353155           | 29190823 | 0 | 0    | 0      | G |
| 28 | G1372f34S204            | 29212321 | G | 0    | 0      | A |
| 28 | BICF2S23036975          | 29231929 | A | 0    | 0      | G |
| 28 | G1373f53S96             | 29265747 | 0 | 0    | 0      | C |
| 28 | BICF2G630267148         | 29304645 | A | 0    | 0      | C |
| 28 | BICF2G630267119         | 29317692 | C | 0    | 0      | A |
| 28 | BICF2G630267100         | 29328897 | A | 0    | 0      | C |
| 28 | BICF2S2376006           | 29341094 | T | 0    | 0      | A |
| 28 | BICF2G630267079         | 29354557 | G | 0    | 0      | A |
| 28 | BICF2P1174293           | 29359905 | 0 | 0    | 0      | A |
| 28 | BICF2G630267075         | 29381064 | G | 0    | 0      | A |
| 28 | BICF2G630267072         | 29383651 | G | 0    | 0      | A |
| 28 | BICF2P404370            | 29397473 | 0 | 0    | 0      | C |
| 28 | BICF2G630267040         | 29407650 | G | 0    | 0      | A |
| 28 | BICF2P1389408           | 29417289 | G | 0    | 0      | A |
| 28 | BICF2P38722             | 29435297 | 0 | 0    | 0      | A |
| 28 | BICF2P1205894           | 29441358 | G | 0    | 0      | A |
| 28 | BICF2G630267031         | 29456076 | A | 0    | 0      | C |
| 28 | BICF2G630267018         | 29467422 | G | 0    | 0      | A |
| 28 | BICF2S2449062           | 29481311 | G | 0    | 0      | A |
| 28 | TIGRP2P359211_rs8522163 | 29495014 | A | 0    | 0      | C |
| 28 | BICF2P1004594           | 29502069 | C | 0    | 0      | G |
| 28 | BICF2G630266978         | 29545895 | G | 0    | 0      | A |
| 28 | BICF2G630266967         | 29557721 | C | 0    | 0      | A |
| 28 | BICF2G630266952         | 29571684 | G | 0    | 0      | A |
| 28 | TIGRP2P359227_rs8822480 | 29580639 | G | 0    | 0      | A |
| 28 | BICF2G630266946         | 29596615 | A | 0.25 | 0.4286 | G |
| 28 | BICF2P649799            | 29603699 | A | 0    | 0      | G |

|    |                         |          |   |      |        |   |
|----|-------------------------|----------|---|------|--------|---|
| 28 | TIGRP2P359239_rs8921997 | 29620760 | G | 0.25 | 0.2857 | A |
| 28 | BICF2P682283            | 29631108 | C | 0    | 0      | G |
| 28 | BICF2P1280094           | 29638647 | G | 0    | 0      | A |
| 28 | BICF2P1280097           | 29639382 | A | 0.25 | 0.4286 | G |
| 28 | BICF2P1280098           | 29639467 | G | 0.25 | 0.4286 | A |
| 28 | BICF2G630266918         | 29647213 | G | 0.5  | 0.7143 | A |
| 28 | BICF2G630266889         | 29663169 | G | 0    | 0      | A |
| 28 | BICF2S23713455          | 29680765 | 0 | 0    | 0      | C |
| 28 | BICF2P820989            | 29688397 | A | 0    | 0      | G |
| 28 | BICF2S23634548          | 29693423 | G | 0    | 0      | A |
| 28 | BICF2P361809            | 29695583 | G | 0.5  | 0.2857 | A |
| 28 | BICF2P375462            | 29708913 | A | 0    | 0      | G |
| 28 | TIGRP2P359262_rs9081336 | 29722224 | 0 | 0    | 0      | G |
| 28 | BICF2P1202732           | 29729820 | A | 0.5  | 0.2857 | G |
| 28 | BICF2P675456            | 29741520 | 0 | 0    | 0      | G |
| 28 | BICF2P273614            | 29757319 | A | 0.5  | 0.2857 | G |
| 28 | TIGRP2P359283_rs8906699 | 29765105 | A | 0.5  | 0.7143 | G |
| 28 | TIGRP2P359286_rs8612437 | 29774047 | A | 0.5  | 0.7143 | C |
| 28 | BICF2S23739838          | 29786501 | A | 0    | 0      | G |
| 28 | BICF2P605040            | 29802220 | A | 0    | 0      | G |
| 28 | BICF2P860329            | 29807072 | A | 0    | 0      | G |
| 28 | BICF2P860325            | 29809154 | A | 0.25 | 0.4286 | G |
| 28 | BICF2P713078            | 29823752 | A | 0.25 | 0.4286 | C |
| 28 | BICF2P1093140           | 29834357 | C | 0.25 | 0.4286 | G |
| 28 | BICF2P1367901           | 29849363 | A | 0.5  | 0.7143 | G |
| 28 | BICF2P1235465           | 29865313 | A | 0.5  | 0.7857 | G |
| 28 | TIGRP2P359320_rs8651306 | 29866778 | C | 0.5  | 0.7857 | A |
| 28 | BICF2P164906            | 29883449 | T | 0.5  | 0.7857 | A |
| 28 | BICF2P785536            | 29898726 | G | 0.75 | 0.7143 | A |
| 28 | BICF2S23243414          | 29905668 | G | 0.75 | 0.7143 | A |
| 28 | BICF2P76711             | 29915044 | A | 0    | 0      | G |
| 28 | TIGRP2P359338_rs9243008 | 29924945 | A | 0    | 0      | G |
| 28 | TIGRP2P359346_rs8819266 | 29935607 | A | 0    | 0      | G |
| 28 | BICF2P461951            | 29944090 | A | 0    | 0      | G |
| 28 | TIGRP2P359354_rs9101075 | 29946029 | G | 0    | 0      | A |
| 28 | BICF2S23729435          | 30008030 | C | 0    | 0      | G |
| 28 | BICF2S23526349          | 30024218 | A | 0    | 0      | G |
| 28 | BICF2S23131560          | 30031371 | A | 0    | 0      | C |
| 28 | TIGRP2P359363_rs9097100 | 30041273 | A | 0    | 0      | G |
| 28 | BICF2P1074256           | 30056275 | A | 0    | 0      | G |
| 28 | BICF2S23544212          | 30064991 | A | 0    | 0      | C |
| 28 | TIGRP2P359378_rs8611444 | 30083314 | A | 0    | 0      | G |
| 28 | TIGRP2P359379_rs8923256 | 30084823 | A | 0    | 0      | C |
| 28 | BICF2P789251            | 30106701 | A | 0.5  | 0.2143 | G |
| 28 | TIGRP2P359384_rs8901377 | 30107080 | G | 0.5  | 0.2143 | A |
| 28 | BICF2S23415978          | 30124885 | T | 0.25 | 0.2857 | A |
| 28 | BICF2G630266879         | 30147868 | C | 0    | 0      | A |

|    |                         |          |   |      |        |   |
|----|-------------------------|----------|---|------|--------|---|
| 28 | BICF2P206726            | 30153190 | 0 | 0    | 0      | G |
| 28 | TIGRP2P359393_rs9182327 | 30176521 | 0 | 0    | 0      | A |
| 28 | BICF2G630266849         | 30195558 | A | 0.5  | 0.7857 | C |
| 28 | BICF2P326833            | 30203088 | C | 0    | 0      | A |
| 28 | BICF2P1352035           | 30219772 | T | 0    | 0      | A |
| 28 | BICF2P1208873           | 30227208 | G | 0    | 0      | A |
| 28 | BICF2S23144313          | 30230605 | A | 0    | 0      | G |
| 28 | BICF2S2329424           | 30248931 | 0 | 0    | 0      | C |
| 28 | TIGRP2P359430_rs9161754 | 30275373 | 0 | 0    | 0      | C |
| 28 | BICF2P890532            | 30283526 | 0 | 0    | 0      | G |
| 28 | BICF2P460026            | 30307073 | 0 | 0    | 0      | G |
| 28 | TIGRP2P359431_rs8851443 | 30330008 | 0 | 0    | 0      | C |
| 28 | BICF2S23638600          | 30343189 | G | 0    | 0      | A |
| 28 | TIGRP2P359432_rs8702744 | 30353419 | 0 | 0    | 0      | C |
| 28 | BICF2P768151            | 30363966 | 0 | 0    | 0      | G |
| 28 | BICF2P1195404           | 30387322 | 0 | 0    | 0      | A |
| 28 | BICF2P44035             | 30403737 | A | 0.5  | 0.7857 | G |
| 28 | BICF2S2443360           | 30406232 | 0 | 0    | 0      | G |
| 28 | BICF2S23251497          | 30424325 | G | 0.5  | 0.7857 | A |
| 28 | BICF2P1224237           | 30430154 | T | 0    | 0      | A |
| 28 | BICF2P786555            | 30440537 | A | 0    | 0      | G |
| 28 | BICF2P576881            | 30452030 | G | 0    | 0      | A |
| 28 | BICF2S23542543          | 30472423 | C | 0.5  | 0.7857 | A |
| 28 | BICF2P731977            | 30485348 | A | 0    | 0      | G |
| 28 | BICF2P1157709           | 30492777 | G | 0.5  | 0.7857 | A |
| 28 | BICF2P1185187           | 30508193 | G | 0.5  | 0.7857 | A |
| 28 | BICF2P1085247           | 30529590 | A | 0.5  | 0.7857 | G |
| 28 | BICF2P113296            | 30553893 | 0 | 0    | 0      | C |
| 28 | BICF2P283420            | 30557668 | A | 0    | 0      | G |
| 28 | BICF2P422266            | 30575446 | A | 0.5  | 0.2143 | G |
| 28 | BICF2P146383            | 30579569 | 0 | 0    | 0      | A |
| 28 | BICF2P211886            | 30591627 | G | 1    | 1      | A |
| 28 | BICF2P979102            | 30600842 | A | 0    | 0      | G |
| 28 | BICF2P1146992           | 30604475 | A | 0.5  | 0.2143 | G |
| 28 | BICF2P387998            | 30623690 | A | 0.5  | 0.2143 | C |
| 28 | BICF2P939295            | 30633111 | C | 0.5  | 0.7857 | A |
| 28 | TIGRP2P359438_rs8711302 | 30640429 | A | 0    | 0      | G |
| 28 | TIGRP2P359442_rs8841520 | 30653501 | A | 0.5  | 0.7857 | C |
| 28 | BICF2P1346402           | 30666214 | A | 0    | 0      | G |
| 28 | BICF2P536966            | 30684806 | A | 0    | 0      | T |
| 28 | BICF2P1182512           | 30698229 | A | 0.5  | 0.2143 | G |
| 28 | BICF2P318200            | 30704989 | A | 0    | 0      | G |
| 28 | BICF2P1200584           | 30712002 | G | 0    | 0      | A |
| 28 | BICF2P1442598           | 30726881 | A | 0.25 | 0.2143 | G |
| 28 | BICF2P637263            | 30735100 | A | 0    | 0      | G |
| 28 | BICF2P1355699           | 30739952 | G | 0    | 0      | A |
| 28 | TIGRP2P359477_rs9004589 | 30754905 | C | 0.25 | 0.2143 | A |

|    |                         |          |   |      |        |   |
|----|-------------------------|----------|---|------|--------|---|
| 28 | BICF2P152354            | 30777071 | 0 | 0    | 0      | G |
| 28 | BICF2G630266835         | 30792055 | 0 | 0    | 0      | A |
| 28 | TIGRP2P359511_rs8623667 | 30809451 | 0 | 0    | 0      | G |
| 28 | TIGRP2P359522_rs9195777 | 30826899 | 0 | 0    | 0      | A |
| 28 | TIGRP2P359524_rs8514571 | 30834524 | A | 0    | 0      | G |
| 28 | TIGRP2P359529_rs8587142 | 30848713 | 0 | 0    | 0      | G |
| 28 | BICF2S23331481          | 30857865 | G | 0.25 | 0.2143 | A |
| 28 | BICF2P359233            | 30867959 | 0 | 0    | 0      | G |
| 28 | BICF2P542593            | 30884525 | A | 0    | 0      | G |
| 28 | BICF2S23155757          | 30905296 | A | 0.25 | 0.2143 | C |
| 28 | BICF2S23218949          | 30923283 | G | 0.75 | 0.7857 | A |
| 28 | TIGRP2P359583_rs8937466 | 30928562 | 0 | 0    | 0      | A |
| 28 | BICF2S23252115          | 30929263 | A | 0.75 | 0.7857 | T |
| 28 | BICF2P1101128           | 30955307 | 0 | 0    | 0      | C |
| 28 | TIGRP2P359593_rs9086811 | 30965391 | G | 0    | 0      | A |
| 28 | BICF2P781438            | 30968816 | A | 1    | 1      | G |
| 28 | BICF2P781445            | 30971109 | A | 0    | 0      | G |
| 28 | BICF2S23037252          | 30982284 | A | 0    | 0      | G |
| 28 | BICF2P1377825           | 30995644 | A | 0.25 | 0.2143 | C |
| 28 | BICF2P1292280           | 31015429 | A | 0.25 | 0.2143 | C |
| 28 | BICF2P738204            | 31019400 | A | 0    | 0      | C |
| 28 | BICF2S23216822          | 31029075 | A | 0.25 | 0.2143 | G |
| 28 | BICF2P1038282           | 31038875 | A | 0.25 | 0.2143 | C |
| 28 | BICF2S2298007           | 31048859 | A | 0.75 | 0.7857 | G |
| 28 | BICF2P987225            | 31060266 | A | 0.75 | 0.7857 | G |
| 28 | BICF2S23748889          | 31069174 | 0 | 0    | 0      | G |
| 28 | BICF2P747434            | 31081476 | A | 0.75 | 0.7857 | C |
| 28 | BICF2P50770             | 31089904 | A | 0.75 | 0.7857 | C |
| 28 | BICF2P1213104           | 31102054 | G | 0.75 | 0.7857 | A |
| 28 | BICF2P582701            | 31114087 | A | 0.25 | 0.2143 | G |
| 28 | BICF2P319450            | 31122240 | A | 0.75 | 0.7857 | G |
| 28 | BICF2P542532            | 31132206 | A | 0.75 | 0.7857 | G |
| 28 | BICF2P840900            | 31143774 | G | 0.75 | 0.7857 | C |
| 28 | BICF2P12825             | 31160221 | A | 0.75 | 0.7857 | G |
| 28 | BICF2P540535            | 31172963 | 0 | 0    | 0      | A |
| 28 | BICF2P1361147           | 31181079 | 0 | 0    | 0      | G |
| 28 | BICF2S23610515          | 31204502 | G | 0    | 0      | A |
| 28 | BICF2P1377011           | 31219302 | 0 | 0    | 0      | G |
| 28 | BICF2S22948924          | 31229720 | A | 0    | 0      | G |
| 28 | BICF2S23438790          | 31234129 | G | 0    | 0      | A |
| 28 | BICF2S23344610          | 31251158 | G | 0.75 | 0.7857 | A |
| 28 | BICF2S23642629          | 31259407 | A | 0    | 0      | G |
| 28 | BICF2S23340306          | 31290669 | G | 0.75 | 0.7857 | A |
| 28 | BICF2S23519370          | 31300481 | T | 0.25 | 0.2143 | A |
| 28 | BICF2S23023420          | 31307222 | A | 0.25 | 0.2143 | G |
| 28 | BICF2S23732579          | 31369553 | G | 0.75 | 0.7857 | A |
| 28 | BICF2S23528453          | 31373500 | G | 0    | 0      | A |

|    |                |          |   |      |        |   |
|----|----------------|----------|---|------|--------|---|
| 28 | BICF2P252424   | 31389983 | 0 | 0    | 0      | A |
| 28 | BICF2P507432   | 31401269 | A | 0    | 0      | G |
| 28 | BICF2P1174597  | 31443446 | A | 0    | 0      | G |
| 28 | BICF2S23657259 | 31461713 | 0 | 0    | 0      | G |
| 28 | BICF2P568768   | 31474096 | 0 | 0    | 0      | A |
| 28 | BICF2P268676   | 31480320 | 0 | 0    | 0      | G |
| 28 | BICF2P435385   | 31497218 | 0 | 0    | 0      | A |
| 28 | BICF2P395090   | 31503958 | G | 1    | 1      | A |
| 28 | BICF2P128045   | 31511542 | 0 | 0    | 0      | A |
| 28 | BICF2P482746   | 31524313 | 0 | 0    | 0      | G |
| 28 | BICF2P761135   | 31529191 | A | 0.25 | 0.2143 | G |
| 28 | BICF2P143598   | 31543496 | A | 0    | 0      | G |
| 28 | BICF2S23417245 | 31544538 | C | 0    | 0      | A |
| 28 | BICF2P917284   | 31557920 | G | 0    | 0      | A |
| 28 | BICF2P644848   | 31568362 | G | 0    | 0      | A |
| 28 | BICF2P1107949  | 31583562 | A | 0    | 0      | G |
| 28 | BICF2P304359   | 31597816 | A | 0    | 0      | C |
| 28 | BICF2P933497   | 31608989 | A | 0.25 | 0.2143 | G |
| 28 | BICF2P170783   | 31623597 | A | 0    | 0      | G |
| 28 | BICF2P173563   | 31632848 | A | 0    | 0      | G |
| 28 | BICF2S23127070 | 31640044 | A | 0    | 0      | G |
| 28 | BICF2P1039800  | 31656517 | 0 | 0    | 0      | T |
| 28 | BICF2P118288   | 31673263 | G | 0.25 | 0.2143 | A |
| 28 | BICF2P516091   | 31680712 | A | 0    | 0      | G |
| 28 | BICF2P217694   | 31689879 | A | 0    | 0      | G |
| 28 | BICF2P993400   | 31702108 | G | 0    | 0      | A |
| 28 | BICF2P199261   | 31707590 | A | 0    | 0      | G |
| 28 | BICF2P154876   | 31718162 | G | 0    | 0      | A |
| 28 | BICF2P575328   | 31719170 | G | 0    | 0      | A |
| 28 | BICF2S23451129 | 31745450 | G | 0.25 | 0.2143 | A |
| 28 | BICF2P434237   | 31759122 | A | 0.25 | 0.2143 | G |
| 28 | BICF2S22949775 | 31765752 | 0 | 0    | 0      | A |
| 28 | BICF2P111357   | 31779462 | G | 0    | 0      | A |
| 28 | BICF2S23117318 | 31786581 | A | 0    | 0.2143 | C |
| 28 | BICF2S23228213 | 31798082 | A | 0.75 | 0.7857 | G |
| 28 | BICF2P564540   | 31810831 | G | 0    | 0      | A |
| 28 | BICF2P569448   | 31819878 | C | 0.75 | 0.7857 | A |
| 28 | BICF2P547635   | 31826646 | G | 0.75 | 0.7857 | A |
| 28 | BICF2P655142   | 31833227 | G | 0.75 | 0.7857 | A |
| 28 | BICF2P1082289  | 31848247 | C | 0    | 0      | A |
| 28 | BICF2P852567   | 31862331 | G | 0.75 | 0.7857 | A |
| 28 | BICF2P1325601  | 31866588 | A | 0.75 | 0.7857 | G |
| 28 | BICF2P1101448  | 31868667 | A | 0.75 | 0.7857 | G |
| 28 | BICF2P353217   | 31881499 | A | 0    | 0      | G |
| 28 | BICF2S23053827 | 31897674 | A | 0    | 0      | G |
| 28 | BICF2P1190324  | 31901854 | G | 0    | 0      | A |
| 28 | BICF2P716112   | 31919106 | A | 0    | 0      | G |

|    |                |          |   |      |        |   |
|----|----------------|----------|---|------|--------|---|
| 28 | BICF2P6583     | 31929066 | A | 0    | 0      | G |
| 28 | BICF2P898879   | 31936484 | A | 0.75 | 0.7857 | C |
| 28 | BICF2P612876   | 31948606 | A | 0    | 0      | G |
| 28 | BICF2P178359   | 31962021 | A | 0.25 | 0.2143 | G |
| 28 | BICF2P348762   | 31970047 | A | 0.75 | 0.7857 | G |
| 28 | BICF2P382676   | 31986276 | A | 0    | 0      | G |
| 28 | BICF2P497257   | 32007061 | G | 0.25 | 0.2143 | A |
| 28 | BICF2P838704   | 32023720 | A | 0    | 0      | G |
| 28 | BICF2P136914   | 32033569 | C | 0.75 | 0.7857 | A |
| 28 | BICF2P1345648  | 32044381 | A | 0.25 | 0.2143 | G |
| 28 | BICF2P1122577  | 32059012 | A | 0.75 | 0.7857 | G |
| 28 | BICF2P54324    | 32069670 | 0 | 0    | 0      | G |
| 28 | BICF2S23149665 | 32084966 | G | 0    | 0      | C |
| 28 | BICF2P1046032  | 32112300 | A | 1    | 1      | C |
| 28 | BICF2P895332   | 32123720 | A | 0    | 0      | G |
| 28 | BICF2P417230   | 32132658 | A | 0    | 0      | G |
| 28 | BICF2P1020964  | 32144727 | G | 0    | 0      | A |
| 28 | BICF2P1190530  | 32176968 | C | 0    | 0      | G |
| 28 | BICF2P1190529  | 32177193 | G | 0    | 0      | A |
| 28 | BICF2P1396561  | 32201555 | A | 0    | 0      | G |
| 28 | BICF2P1027161  | 32215236 | G | 0.25 | 0.2143 | A |
| 28 | BICF2S23510607 | 32230015 | G | 0.75 | 0.7857 | C |
| 28 | BICF2S23642779 | 32235018 | G | 0.75 | 0.7857 | A |
| 28 | BICF2P26893    | 32248584 | G | 0    | 0      | A |
| 28 | BICF2P811811   | 32264636 | A | 0    | 0      | G |
| 28 | BICF2S23638791 | 32280211 | G | 0    | 0      | A |
| 28 | BICF2S23256321 | 32290140 | G | 0    | 0      | A |
| 28 | BICF2P445612   | 32321902 | A | 0    | 0      | G |
| 28 | BICF2P309569   | 32336561 | G | 0.25 | 0.2143 | A |
| 28 | BICF2P1131088  | 32355640 | 0 | 0    | 0      | A |
| 28 | BICF2P1383866  | 32371565 | C | 0    | 0      | A |
| 28 | BICF2S23625737 | 32381461 | G | 0    | 0      | C |
| 28 | BICF2S23728077 | 32392936 | G | 0    | 0      | A |
| 28 | BICF2S23450605 | 32409757 | A | 0    | 0      | G |
| 28 | BICF2S2311276  | 32426027 | G | 0    | 0      | A |
| 28 | BICF2P837846   | 32434280 | G | 0.25 | 0.2143 | A |
| 28 | BICF2P648711   | 32447606 | A | 0    | 0      | G |
| 28 | BICF2S23644375 | 32457429 | G | 0    | 0      | A |
| 28 | BICF2P181775   | 32465953 | C | 0.75 | 0.7857 | A |
| 28 | BICF2P997883   | 32482760 | A | 0    | 0      | G |
| 28 | BICF2P834493   | 32496810 | G | 0.75 | 0.7857 | A |
| 28 | BICF2P834485   | 32500106 | A | 0.75 | 0.7857 | T |
| 28 | BICF2S23313350 | 32506800 | G | 0    | 0      | A |
| 28 | BICF2P929605   | 32514556 | A | 0    | 0      | G |
| 28 | BICF2S23613252 | 32524848 | A | 0.75 | 0.7857 | C |
| 28 | BICF2S2311788  | 32546022 | A | 0    | 0      | G |
| 28 | BICF2S23428160 | 32559187 | A | 0.75 | 0.7857 | G |

|    |                         |          |   |      |        |   |
|----|-------------------------|----------|---|------|--------|---|
| 28 | BICF2P851555            | 32572151 | A | 0.75 | 0.7857 | G |
| 28 | BICF2P913195            | 32586035 | G | 0.75 | 0.7857 | A |
| 28 | BICF2S23536995          | 32596902 | A | 0.75 | 0.7857 | G |
| 28 | BICF2P807867            | 32604108 | 0 | 0    | 0      | C |
| 28 | BICF2P1205860           | 32615998 | A | 0.25 | 0.2143 | C |
| 28 | BICF2S23516321          | 32627558 | C | 0.25 | 0.2857 | A |
| 28 | BICF2P184204            | 32646970 | A | 0    | 0      | G |
| 28 | BICF2P86732             | 32651391 | C | 0.5  | 0.5    | A |
| 28 | BICF2P1252506           | 32676786 | G | 0.75 | 0.7857 | A |
| 28 | BICF2P410956            | 32691212 | 0 | 0    | 0      | C |
| 28 | BICF2P730722            | 32699190 | A | 0    | 0      | G |
| 28 | BICF2P630416            | 32707561 | A | 0    | 0      | G |
| 28 | BICF2P1401008           | 32710725 | C | 0.75 | 0.7857 | A |
| 28 | BICF2P1401010           | 32711178 | G | 0.75 | 0.7857 | A |
| 28 | BICF2P1221852           | 32737360 | 0 | 0    | 0      | G |
| 28 | BICF2P837467            | 32748835 | A | 0    | 0      | T |
| 28 | BICF2P483466            | 32760399 | G | 0.25 | 0.2143 | A |
| 28 | BICF2P984960            | 32763710 | A | 0.25 | 0.2143 | G |
| 28 | BICF2S2316018           | 32776839 | A | 0.25 | 0.2857 | T |
| 28 | BICF2P982248            | 32790648 | 0 | 0    | 0      | G |
| 28 | BICF2P736028            | 32799096 | A | 0    | 0      | G |
| 28 | BICF2S23255441          | 32812149 | A | 0.25 | 0.2857 | G |
| 28 | BICF2P1366958           | 32831671 | G | 0    | 0      | A |
| 28 | BICF2P1366959           | 32831720 | A | 0    | 0      | G |
| 28 | BICF2S23150396          | 32843674 | A | 0    | 0      | G |
| 28 | BICF2P26370             | 32860801 | G | 1    | 1      | A |
| 28 | BICF2P905912            | 32868293 | C | 0    | 0      | A |
| 28 | BICF2S23110243          | 32885374 | A | 0.25 | 0.2857 | G |
| 28 | BICF2P118756            | 32891621 | A | 0.75 | 0.7143 | G |
| 28 | BICF2S23119311          | 32912162 | A | 0    | 0      | G |
| 28 | BICF2P1167338           | 32915862 | A | 0.75 | 0.7143 | G |
| 28 | BICF2P467298            | 32931685 | G | 0.75 | 0.7143 | A |
| 28 | BICF2P375458            | 32944373 | A | 0    | 0      | G |
| 28 | TIGRP2P359617_rs8696465 | 32955598 | C | 0.25 | 0.2857 | A |
| 28 | BICF2S2456333           | 32966020 | A | NA   | NA     | G |
| 28 | BICF2P693868            | 32995718 | A | 0.25 | 0.2857 | G |
| 28 | BICF2P602157            | 33008047 | G | 0.25 | 0.2857 | A |
| 28 | BICF2S23722925          | 33022525 | A | 0.5  | 0.5    | G |
| 28 | BICF2P420662            | 33030142 | A | 0.25 | 0.2143 | G |
| 28 | TIGRP2P359680_rs8906215 | 33047013 | A | 0    | 0      | G |
| 28 | BICF2P423576            | 33052536 | A | 0    | 0      | G |
| 28 | TIGRP2P359684_rs8904786 | 33066358 | A | 0.5  | 0.5    | G |
| 28 | BICF2S23446454          | 33078715 | A | 0.25 | 0.2857 | G |
| 28 | BICF2P1243343           | 33087797 | A | 0.25 | 0.2143 | T |
| 28 | BICF2S23344132          | 33100774 | A | 0.25 | 0.2857 | G |
| 28 | BICF2P1125776           | 33110775 | A | 0    | 0      | C |
| 28 | TIGRP2P359712_rs8701763 | 33121346 | G | 0    | 0      | A |



|    |                         |          |   |      |        |   |
|----|-------------------------|----------|---|------|--------|---|
| 28 | TIGRP2P359718_rs8971524 | 33139098 | G | 0.5  | 0.5714 | A |
| 28 | BICF2S2354805           | 33150599 | A | 0.25 | 0.2143 | G |
| 28 | TIGRP2P359727_rs8892825 | 33157078 | A | 0.75 | 0.6667 | G |
| 28 | BICF2P902122            | 33158530 | A | 0.75 | 0.6429 | G |
| 28 | TIGRP2P359745_rs8603553 | 33176700 | T | 0.75 | 0.7857 | A |
| 28 | BICF2P1310337           | 33177021 | A | 0.75 | 0.7857 | G |
| 28 | TIGRP2P359752_rs9072677 | 33192525 | A | 0.75 | 0.7857 | G |
| 28 | BICF2S23122107          | 33207247 | A | 0.25 | 0.2857 | G |
| 28 | BICF2P829835            | 33218449 | A | 0.25 | 0.2857 | G |
| 28 | TIGRP2P359767_rs8941120 | 33232105 | C | 0.5  | 0.5714 | A |
| 28 | BICF2P376943            | 33237931 | A | 0.25 | 0.2857 | G |
| 28 | BICF2P812404            | 33250876 | G | 0    | 0      | A |
| 28 | BICF2P765236            | 33262581 | G | 0    | 0      | A |
| 28 | TIGRP2P359799_rs8651879 | 33292878 | A | 0.25 | 0.2143 | G |
| 28 | BICF2S23750957          | 33294764 | G | 0    | 0.2143 | A |
| 28 | BICF2P680720            | 33308909 | T | 0    | 0      | A |
| 28 | BICF2P1280822           | 33323171 | A | 0    | 0      | G |
| 28 | BICF2P571023            | 33330731 | G | 0.25 | 0.2857 | A |
| 28 | BICF2P439401            | 33339600 | A | 0    | 0      | G |
| 28 | TIGRP2P359839_rs8907400 | 33352026 | A | 0    | 0      | G |
| 28 | TIGRP2P359849_rs8872221 | 33365610 | A | 0    | 0      | G |
| 28 | BICF2P1099489           | 33373374 | G | 0.5  | 0.5    | A |
| 28 | BICF2P655541            | 33394399 | G | 0.25 | 0.2857 | A |
| 28 | BICF2P233477            | 33400916 | G | 0.5  | 0.5714 | A |
| 28 | BICF2P481060            | 33404794 | G | 0.5  | 0.5714 | A |
| 28 | BICF2P299321            | 33413525 | A | 0.5  | 0.4286 | C |
| 28 | BICF2P782829            | 33439138 | A | 0    | 0      | C |
| 28 | BICF2P1351578           | 33444984 | A | 0.25 | 0.2143 | G |
| 28 | BICF2P475113            | 33455763 | A | 0    | 0      | G |
| 28 | TIGRP2P359881_rs8727634 | 33465087 | A | 0.5  | 0.5714 | G |
| 28 | BICF2S23657699          | 33485926 | G | 0.75 | 0.7857 | A |
| 28 | BICF2P1453414           | 33491709 | A | 0.75 | 0.7857 | G |
| 28 | BICF2P813916            | 33501193 | G | 0.25 | 0.2143 | A |
| 28 | BICF2P92302             | 33521650 | A | 0.75 | 0.7857 | G |
| 28 | BICF2S2378280           | 33522694 | G | 0.25 | 0.2143 | A |
| 28 | BICF2P912171            | 33528472 | C | 0.25 | 0.2143 | A |
| 28 | BICF2S2361512           | 33551054 | G | 0.25 | 0.2143 | A |
| 28 | BICF2P1344588           | 33562594 | G | 0    | 0      | A |
| 28 | BICF2P970255            | 33574726 | A | 0.5  | 0.4286 | G |
| 28 | TIGRP2P359957_rs8712128 | 33578695 | A | 0.5  | 0.4286 | G |
| 28 | BICF2S22962329          | 33582428 | A | 0.5  | 0.5    | G |
| 28 | TIGRP2P359981_rs8878252 | 33594044 | G | 1    | 1      | A |
| 28 | BICF2P1165189           | 33613778 | G | 0    | 0      | A |
| 28 | BICF2P1152935           | 33618384 | G | 0.5  | 0.5    | A |
| 28 | BICF2S23551520          | 33635414 | A | 0    | 0      | G |
| 28 | BICF2S23526112          | 33641056 | A | 0.25 | 0.2143 | G |
| 28 | TIGRP2P360005_rs9100905 | 33651979 | A | 0.75 | 0.7857 | G |

|    |                         |          |   |      |        |   |
|----|-------------------------|----------|---|------|--------|---|
| 28 | BICF2P648597            | 33663483 | G | 0.75 | 0.7857 | A |
| 28 | BICF2S22930398          | 33674717 | G | 0.25 | 0.2143 | A |
| 28 | BICF2S23420109          | 33694613 | A | 0.25 | 0.2143 | G |
| 28 | BICF2P1138175           | 33699706 | A | 0.25 | 0.2857 | G |
| 28 | BICF2P1138176           | 33699856 | A | 0.25 | 0.2857 | G |
| 28 | BICF2S23418537          | 33709161 | G | 0.25 | 0.2143 | A |
| 28 | BICF2S23528158          | 33737752 | 0 | 0    | 0      | C |
| 28 | TIGRP2P360037_rs8692339 | 33745808 | 0 | 0    | 0      | G |
| 28 | BICF2P152960            | 33752987 | C | 0    | 0      | A |
| 28 | BICF2P245661            | 33770326 | C | 0    | 0      | A |
| 28 | BICF2P624991            | 33776958 | A | 1    | 1      | C |
| 28 | BICF2P1340095           | 33794268 | C | 0.75 | 0.7857 | A |
| 28 | BICF2P129724            | 33832027 | A | 0.75 | 0.7857 | G |
| 28 | BICF2P474942            | 33837873 | G | 0    | 0      | A |
| 28 | BICF2P994851            | 33846163 | A | 0.5  | 0.5    | G |
| 28 | BICF2P875158            | 33859323 | 0 | 0    | 0      | G |
| 28 | BICF2P905439            | 33873676 | A | 0.25 | 0.2857 | C |
| 28 | BICF2P1378280           | 33882510 | A | 0.75 | 0.7143 | G |
| 28 | TIGRP2P360068_rs8569389 | 33891370 | 0 | 0    | 0      | C |
| 28 | BICF2P497308            | 33920026 | G | 0    | 0      | A |
| 28 | TIGRP2P360077_rs9048799 | 33926259 | A | 0    | 0      | G |
| 28 | BICF2P865971            | 33946217 | A | 0.25 | 0.2143 | G |
| 28 | TIGRP2P360082_rs9015785 | 33954521 | A | 0.5  | 0.5    | G |
| 28 | BICF2P421067            | 33963079 | A | 0.25 | 0.2857 | G |
| 28 | BICF2P455596            | 33974416 | C | 0.5  | 0.4286 | A |
| 28 | TIGRP2P360097_rs8780787 | 33987144 | G | 0.25 | 0.2857 | A |
| 28 | BICF2P844367            | 33990594 | A | 0.25 | 0.2857 | G |
| 28 | BICF2P1297467           | 34004720 | A | 0.5  | 0.5    | G |
| 28 | BICF2S22948013          | 34015585 | A | 0    | 0      | G |
| 28 | BICF2P481223            | 34026217 | A | 0.5  | 0.5    | G |
| 28 | BICF2S23634798          | 34038586 | A | 0.25 | 0.25   | G |
| 28 | BICF2S23745325          | 34041172 | A | 0.25 | 0.2143 | C |
| 28 | TIGRP2P360122_rs8759395 | 34055066 | G | 0.5  | 0.4286 | A |
| 28 | BICF2P393597            | 34064275 | A | 0    | 0      | G |
| 28 | BICF2P66419             | 34077674 | G | 0.5  | 0.5    | A |
| 28 | BICF2P79405             | 34089767 | A | 0    | 0      | G |
| 28 | BICF2P1166650           | 34099395 | A | 0.5  | 0.5    | G |
| 28 | BICF2P151008            | 34110892 | G | 0.5  | 0.4286 | A |
| 28 | TIGRP2P360154_rs9176137 | 34122691 | A | 0.25 | 0.2857 | G |
| 28 | BICF2P1346918           | 34134349 | C | 0.25 | 0.2857 | A |
| 28 | BICF2P965815            | 34147435 | A | 0    | 0      | G |
| 28 | TIGRP2P360175_rs8537171 | 34161506 | G | 0.75 | 0.7143 | A |
| 28 | BICF2P41735             | 34168488 | G | 0.25 | 0.2857 | A |
| 28 | BICF2P41732             | 34168904 | G | 0.25 | 0.2857 | A |
| 28 | TIGRP2P360182_rs8573717 | 34182421 | G | 0.5  | 0.4286 | A |
| 28 | TIGRP2P360187_rs9038403 | 34190382 | A | 0    | 0      | G |
| 28 | BICF2P520039            | 34203638 | T | 0.25 | 0.25   | A |

|    |                         |          |   |      |        |   |
|----|-------------------------|----------|---|------|--------|---|
| 28 | BICF2S23135171          | 34205272 | C | 0.5  | 0.5    | A |
| 28 | TIGRP2P360213_rs9184273 | 34213253 | A | 0.25 | 0.2857 | G |
| 28 | BICF2P139903            | 34224613 | A | 0.25 | 0.2857 | G |
| 28 | TIGRP2P360257_rs8684995 | 34246862 | A | 0.25 | 0.2143 | G |
| 28 | TIGRP2P360269_rs8960057 | 34261735 | 0 | 0    | 0      | G |
| 28 | BICF2P656631            | 34275514 | A | 0.5  | 0.5    | C |
| 28 | BICF2P1257800           | 34285351 | A | 0.25 | 0.2143 | C |
| 28 | BICF2S23626734          | 34296055 | 0 | 0    | 0      | C |
| 28 | BICF2G630266822         | 34308654 | G | 0.5  | 0.5714 | A |
| 28 | BICF2P1083847           | 34321168 | G | 0.5  | 0.5    | A |
| 28 | BICF2G630266809         | 34332123 | A | 0.5  | 0.4286 | G |
| 28 | BICF2G630266801         | 34344639 | A | 0    | 0      | G |
| 28 | BICF2G630266792         | 34349682 | A | 0    | 0      | G |
| 28 | BICF2G630266753         | 34369456 | G | 0.25 | 0.2143 | A |
| 28 | BICF2G630266750         | 34373532 | G | 0.5  | 0.5    | A |
| 28 | BICF2G630266722         | 34390108 | A | 0.25 | 0.2143 | G |
| 28 | BICF2P641311            | 34397257 | A | 0    | 0      | G |
| 28 | BICF2G630266693         | 34415593 | G | 0    | 0      | A |
| 28 | TIGRP2P360326_rs8928851 | 34427670 | A | 0    | 0      | G |
| 28 | BICF2G630266682         | 34434393 | G | 0    | 0      | A |
| 28 | TIGRP2P360338_rs8679267 | 34444653 | A | 0.25 | 0.2857 | G |
| 28 | BICF2G630266671         | 34466367 | A | 0.5  | 0.5    | G |
| 28 | BICF2P768331            | 34484729 | A | 0.25 | 0.2857 | C |
| 28 | BICF2G630266627         | 34495191 | C | 0.25 | 0.2143 | A |
| 28 | BICF2G630266626         | 34502443 | A | 0.75 | 0.7857 | T |
| 28 | BICF2G630266615         | 34513851 | T | 0.75 | 0.7857 | A |
| 28 | BICF2P1130157           | 34523695 | A | 0.5  | 0.5    | G |
| 28 | BICF2S23653957          | 34538801 | A | 0.5  | 0.5    | C |
| 28 | BICF2S23612754          | 34555482 | 0 | 0    | 0      | G |
| 28 | BICF2P967865            | 34558735 | G | 0.5  | 0.5    | A |
| 28 | BICF2S2337181           | 34569000 | G | 0    | 0      | C |
| 28 | TIGRP2P360372_rs8652804 | 34580733 | A | 0.5  | 0.5    | C |
| 28 | BICF2P159880            | 34595031 | A | 0    | 0      | G |
| 28 | BICF2P636385            | 34604945 | A | 0    | 0      | G |
| 28 | BICF2S2358984           | 34626425 | G | 0    | 0      | A |
| 28 | BICF2S23038631          | 34647721 | G | 0.5  | 0.5    | A |
| 28 | BICF2S22925550          | 34652538 | A | 0    | 0      | C |
| 28 | BICF2P1002387           | 34669330 | C | 0    | 0      | A |
| 28 | BICF2G630266603         | 34674817 | A | 0.25 | 0.2143 | G |
| 28 | TIGRP2P360403_rs8648164 | 34685405 | A | 0    | 0      | G |
| 28 | BICF2G630266592         | 34703729 | A | 0.5  | 0.5    | G |
| 28 | BICF2G630266591         | 34705148 | A | 0.5  | 0.5    | T |
| 28 | BICF2G630266587         | 34709329 | G | 0.5  | 0.5    | A |
| 28 | BICF2P1131708           | 34718776 | G | 0.5  | 0.5    | A |
| 28 | BICF2G630266577         | 34719862 | G | 0.5  | 0.5    | A |
| 28 | BICF2G630266567         | 34737651 | A | 0.5  | 0.5    | C |
| 28 | BICF2G630266553         | 34743651 | G | 0.5  | 0.5    | A |

|    |                         |          |   |      |        |   |
|----|-------------------------|----------|---|------|--------|---|
| 28 | BICF2G630266512         | 34754414 | G | 1    | 1      | A |
| 28 | BICF2P548343            | 34768086 | G | 0.5  | 0.5    | A |
| 28 | BICF2G630266505         | 34768656 | A | 0    | 0      | G |
| 28 | BICF2G630266497         | 34785862 | G | 0.25 | 0.2143 | A |
| 28 | BICF2G630266483         | 34789308 | C | 0.5  | 0.5    | A |
| 28 | BICF2G630266462         | 34801243 | T | 0    | 0      | A |
| 28 | BICF2G630266437         | 34820229 | G | 0.25 | 0.2857 | A |
| 28 | BICF2S22927244          | 34824790 | A | 0.25 | 0.2857 | G |
| 28 | BICF2G630266408         | 34837841 | G | 1    | 1      | A |
| 28 | BICF2S23653269          | 34856691 | A | 0    | 0      | G |
| 28 | BICF2G630266380         | 34870650 | A | 0.25 | 0.2143 | G |
| 28 | BICF2G630266342         | 34887292 | A | 0    | 0      | C |
| 28 | BICF2G630266330         | 34891560 | A | 0    | 0      | G |
| 28 | BICF2P308497            | 34905955 | A | 0.25 | 0.2143 | G |
| 28 | BICF2G630266311         | 34918601 | A | 0.25 | 0.2143 | G |
| 28 | BICF2S23436005          | 34921023 | A | 0    | 0      | G |
| 28 | BICF2G630266292         | 34925888 | G | 0.75 | 0.7857 | A |
| 28 | BICF2P513614            | 34938085 | A | 0.25 | 0.2857 | G |
| 28 | BICF2G630266222         | 34950676 | G | 0.5  | 0.5    | A |
| 28 | BICF2G630266188         | 34961697 | G | 0.5  | 0.5    | A |
| 28 | BICF2G630266175         | 34967932 | 0 | 0    | 0      | A |
| 28 | BICF2G630266160         | 34973522 | A | 0    | 0      | G |
| 28 | BICF2S2369429           | 34984810 | 0 | 0    | 0      | G |
| 28 | BICF2P816908            | 35002133 | 0 | 0    | 0      | G |
| 28 | BICF2G630266114         | 35006049 | G | 0.25 | 0.2143 | C |
| 28 | TIGRP2P360492_rs9089094 | 35029888 | 0 | 0    | 0      | A |
| 28 | BICF2G630266097         | 35043790 | G | 0.5  | 0.5    | A |
| 28 | BICF2P517106            | 35052214 | G | 0    | 0      | A |
| 28 | BICF2P271175            | 35068428 | G | 0    | 0      | A |
| 28 | BICF2P333659            | 35085323 | G | 0.5  | 0.5    | A |
| 28 | BICF2G630266068         | 35096280 | G | 0.5  | 0.5    | A |
| 28 | BICF2P390044            | 35101841 | A | 1    | 1      | G |
| 28 | TIGRP2P360512_rs8524157 | 35111641 | C | 0    | 0      | G |
| 28 | TIGRP2P360517_rs8987253 | 35121040 | A | 0    | 0      | G |
| 28 | BICF2G630266011         | 35130220 | A | 0.25 | 0.2857 | G |
| 28 | BICF2S23638199          | 35137860 | G | 0.25 | 0.2143 | A |
| 28 | BICF2P975744            | 35144543 | T | 0.25 | 0.2857 | A |
| 28 | BICF2G630265976         | 35159726 | C | 0    | 0      | A |
| 28 | BICF2G630265949         | 35179281 | A | 0    | 0      | G |
| 28 | TIGRP2P360538_rs9075304 | 35194050 | 0 | 0    | 0      | G |
| 28 | BICF2S23433356          | 35201501 | A | 0.5  | 0.5    | G |
| 28 | BICF2S22937508          | 35222047 | A | 0.5  | 0.5    | G |
| 28 | BICF2G630265803         | 35259123 | 0 | 0    | 0      | G |
| 28 | BICF2P1339748           | 35278015 | A | 0.5  | 0.5    | G |
| 28 | BICF2S23616783          | 35282572 | 0 | 0    | 0      | G |
| 28 | BICF2G630265674         | 35322332 | A | 0    | 0      | C |
| 28 | BICF2P209259            | 35336029 | 0 | 0    | 0      | A |

|    |                         |          |   |      |        |   |
|----|-------------------------|----------|---|------|--------|---|
| 28 | BICF2G630265653         | 35348277 | C | 0    | 0      | A |
| 28 | BICF2G630265640         | 35352139 | A | 0    | 0      | C |
| 28 | BICF2P114685            | 35369286 | A | 0.25 | 0.2143 | C |
| 28 | BICF2P550087            | 35375515 | A | 0    | 0      | G |
| 28 | BICF2P502255            | 35394166 | G | 0.25 | 0.2143 | A |
| 28 | BICF2P1075967           | 35399077 | A | 0.5  | 0.4286 | G |
| 28 | BICF2P983792            | 35411435 | G | 0.25 | 0.2143 | A |
| 28 | BICF2P836320            | 35419967 | T | 0.25 | 0.2143 | A |
| 28 | BICF2G630265615         | 35425388 | G | 0.25 | 0.2143 | A |
| 28 | BICF2G630265588         | 35435799 | A | 0    | 0      | G |
| 28 | BICF2G630265567         | 35443929 | A | 1    | 1      | G |
| 28 | BICF2G630265545         | 35451038 | G | 0.75 | 0.7857 | A |
| 28 | BICF2G630265491         | 35466860 | A | 0    | 0      | G |
| 28 | BICF2G630265488         | 35467679 | G | 0    | 0      | A |
| 28 | BICF2G630265475         | 35486677 | A | 0.5  | 0.5    | G |
| 28 | BICF2G630265448         | 35506791 | G | 0.5  | 0.5    | A |
| 28 | BICF2G630265433         | 35512322 | G | 0.5  | 0.5    | A |
| 28 | BICF2S23338641          | 35523720 | T | 0.5  | 0.5    | A |
| 28 | BICF2G630265383         | 35542857 | A | 0    | 0      | G |
| 28 | BICF2G630265372         | 35555508 | G | 0.25 | 0.2857 | A |
| 28 | BICF2P650748            | 35560110 | G | 0    | 0      | A |
| 28 | BICF2P627489            | 35569729 | A | 0.5  | 0.5714 | G |
| 28 | BICF2P1259747           | 35584458 | G | 0.75 | 0.7857 | A |
| 28 | BICF2P1467581           | 35595659 | A | 0    | 0      | G |
| 28 | BICF2P708179            | 35611041 | A | 0.75 | 0.7857 | G |
| 28 | BICF2G630265350         | 35625457 | A | 0.75 | 0.7857 | G |
| 28 | BICF2G630265335         | 35630771 | A | 0    | 0      | C |
| 28 | BICF2S23758182          | 35642983 | G | 0.25 | 0.2857 | A |
| 28 | BICF2P712973            | 35652860 | G | 0.25 | 0.2857 | A |
| 28 | BICF2G630265323         | 35663697 | A | 0    | 0      | G |
| 28 | BICF2G630265313         | 35682924 | A | 0.75 | 0.7143 | T |
| 28 | BICF2G630265305         | 35685196 | G | 0    | 0      | A |
| 28 | BICF2P1064323           | 35700888 | A | 0.25 | 0.2857 | C |
| 28 | BICF2S23047362          | 35712077 | A | 0.75 | 0.7143 | C |
| 28 | BICF2S2331225           | 35724033 | G | 0.75 | 0.7143 | A |
| 28 | BICF2P1322747           | 35739762 | A | 0    | 0      | G |
| 28 | BICF2P1322744           | 35742040 | A | 0    | 0      | G |
| 28 | BICF2P314653            | 35753548 | A | 0    | 0      | T |
| 28 | BICF2P772661            | 35773372 | A | 0    | 0      | G |
| 28 | BICF2P1370886           | 35781765 | G | 0    | 0      | A |
| 28 | BICF2P455484            | 35790070 | A | 0    | 0      | G |
| 28 | BICF2S23013378          | 35806380 | G | 0    | 0      | A |
| 28 | BICF2S23725118          | 35816791 | G | 0.25 | 0.2857 | A |
| 28 | TIGRP2P360831_rs8529256 | 35824739 | 0 | 0    | 0      | C |
| 28 | BICF2S23764794          | 35836287 | G | 0    | 0      | A |
| 28 | BICF2P1383329           | 35850116 | A | 0.5  | 0.5    | G |
| 28 | BICF2S23718935          | 35860806 | G | 0.5  | 0.5    | A |

|    |                |          |   |      |        |   |
|----|----------------|----------|---|------|--------|---|
| 28 | BICF2S23711138 | 35870285 | A | 0.25 | 0.2143 | G |
| 28 | BICF2P521135   | 35888961 | A | 0.25 | 0.2143 | G |
| 28 | BICF2P632920   | 35892743 | G | 0.25 | 0.2143 | A |
| 28 | BICF2P215020   | 35903372 | G | 0.5  | 0.5    | A |
| 28 | BICF2S23552971 | 35915469 | G | 0.5  | 0.5    | A |
| 28 | BICF2P1009325  | 35936999 | A | 0.25 | 0.2143 | G |
| 28 | BICF2P638115   | 35942178 | G | 0.75 | 0.7143 | A |
| 28 | BICF2P1217210  | 35951107 | A | 0.25 | 0.1667 | G |
| 28 | BICF2P149903   | 35974245 | A | 0.25 | 0.2857 | G |
| 28 | BICF2S2379347  | 36001937 | G | 0.25 | 0.2143 | A |
| 28 | BICF2P553986   | 36011479 | G | 0.5  | 0.5    | A |
| 28 | BICF2P1132890  | 36050750 | G | 0.5  | 0.5    | A |
| 28 | BICF2S22912134 | 36058765 | G | 0    | 0      | A |
| 28 | BICF2P547800   | 36070868 | 0 | 0    | 0      | G |
| 28 | BICF2P53148    | 36086972 | G | 0.25 | 0.2143 | A |
| 28 | BICF2P20734    | 36102949 | 0 | 0    | 0      | G |
| 28 | BICF2P1340023  | 36115130 | A | 0    | 0      | G |
| 28 | BICF2P302000   | 36127779 | G | 0.25 | 0.2143 | A |
| 28 | BICF2P578612   | 36135680 | G | 0    | 0      | A |
| 28 | BICF2P1141676  | 36138568 | 0 | 0    | 0      | G |
| 28 | BICF2P372855   | 36149577 | A | 0    | 0      | C |
| 28 | BICF2P882855   | 36167374 | A | 0.25 | 0.2143 | T |
| 28 | BICF2P1219979  | 36177807 | A | 0.25 | 0.2143 | G |
| 28 | BICF2P1457093  | 36181071 | A | 0.25 | 0.2143 | G |
| 28 | BICF2P580493   | 36199386 | G | 0    | 0      | A |
| 28 | BICF2P105927   | 36207852 | A | 0.75 | 0.7857 | G |
| 28 | BICF2P373799   | 36223017 | 0 | 0    | 0      | G |
| 28 | BICF2P638897   | 36224473 | 0 | 0    | 0      | A |
| 28 | BICF2P666839   | 36225138 | A | 0    | 0      | G |
| 28 | BICF2S22921191 | 36239983 | G | 0    | 0      | A |
| 28 | BICF2P406056   | 36250581 | A | 0.25 | 0.2143 | G |
| 28 | BICF2P92531    | 36254853 | A | 0    | 0      | G |
| 28 | BICF2P1462171  | 36264985 | A | 0.25 | 0.2143 | G |
| 28 | BICF2S23136088 | 36271579 | A | 0.5  | 0.4286 | G |
| 28 | BICF2P632176   | 36281639 | A | 0.75 | 0.7857 | G |
| 28 | BICF2P736885   | 36286519 | A | 0.75 | 0.7857 | G |
| 28 | BICF2P701412   | 36292570 | 0 | 0    | 0      | A |
| 28 | BICF2P1027392  | 36294040 | A | 0.5  | 0.5    | G |
| 28 | BICF2P330519   | 36310012 | G | 0.25 | 0.2143 | A |
| 28 | BICF2P419340   | 36321918 | A | 0.25 | 0.2857 | T |
| 28 | BICF2P479179   | 36324979 | 0 | 0    | 0      | A |
| 28 | BICF2P251474   | 36334176 | A | 0.25 | 0.2857 | G |
| 28 | BICF2P601142   | 36351648 | A | 0    | 0      | G |
| 28 | BICF2P1362970  | 36366395 | A | 0.25 | 0.2143 | G |
| 28 | BICF2S23713476 | 36406961 | A | 0.5  | 0.5    | G |
| 28 | BICF2S23312723 | 36416132 | A | 0    | 0      | G |
| 28 | BICF2P1276005  | 36428542 | A | 0    | 0      | G |

|    |                         |          |   |      |        |   |
|----|-------------------------|----------|---|------|--------|---|
| 28 | BICF2P182430            | 36433224 | A | 0.25 | 0.2857 | G |
| 28 | BICF2P820871            | 36450714 | 0 | 0    | 0      | G |
| 28 | BICF2P1414090           | 36461908 | A | 0.25 | 0.2857 | G |
| 28 | BICF2S23616264          | 36476271 | A | 0.25 | 0.2143 | G |
| 28 | BICF2S23641175          | 36487047 | G | 0.5  | 0.5    | A |
| 28 | BICF2S23647773          | 36491113 | A | 0.5  | 0.5    | G |
| 28 | BICF2P1398635           | 36505441 | A | 0.25 | 0.25   | C |
| 28 | BICF2P514889            | 36527700 | A | 0.5  | 0.5714 | C |
| 28 | BICF2S23435944          | 36545369 | G | 0.5  | 0.5    | A |
| 28 | BICF2P1216470           | 36551133 | A | 0.25 | 0.2857 | G |
| 28 | BICF2P369176            | 36561517 | G | 0    | 0      | A |
| 28 | BICF2P234879            | 36565696 | A | 0.75 | 0.7857 | G |
| 28 | BICF2S23646489          | 36571942 | A | 0    | 0      | G |
| 28 | BICF2P526500            | 36575831 | A | 0.75 | 0.7143 | G |
| 28 | BICF2S22913299          | 36579145 | A | 0.25 | 0.2857 | C |
| 28 | BICF2P929098            | 36590692 | A | 0.25 | 0.2857 | G |
| 28 | BICF2P970706            | 36594209 | A | 0.75 | 0.7143 | G |
| 28 | BICF2S2391501           | 36614332 | A | 0.25 | 0.2143 | G |
| 28 | BICF2P1401115           | 36621711 | A | 0    | 0      | G |
| 28 | BICF2S235121            | 36637397 | A | 0    | 0      | T |
| 28 | BICF2S23019573          | 36640950 | G | 0    | 0      | A |
| 28 | BICF2P474452            | 36658898 | A | 0    | 0      | G |
| 28 | BICF2P1202181           | 36677252 | A | 0.25 | 0.2143 | G |
| 28 | BICF2P509682            | 36685078 | A | 1    | 1      | G |
| 28 | BICF2P533524            | 36687090 | G | 1    | 1      | A |
| 28 | BICF2P242217            | 36707541 | A | 0    | 0      | G |
| 28 | BICF2P1009385           | 36718732 | A | 0.25 | 0.2143 | C |
| 28 | BICF2S2334703           | 36729795 | G | 0.5  | 0.4286 | A |
| 28 | BICF2P373781            | 36742134 | G | 0.5  | 0.5714 | A |
| 28 | BICF2P1417579           | 36752502 | G | 0.5  | 0.5714 | A |
| 28 | BICF2P726032            | 36755453 | A | 0    | 0      | G |
| 28 | BICF2P531241            | 36765587 | G | 0.75 | 0.7857 | A |
| 28 | BICF2S23140514          | 36783904 | A | 0.25 | 0.1667 | G |
| 28 | BICF2P93712             | 36791887 | T | 0    | 0      | A |
| 28 | BICF2P863977            | 36800264 | A | 0    | 0      | G |
| 28 | BICF2S23629771          | 36814270 | G | 0    | 0      | A |
| 28 | BICF2P836718            | 36824134 | A | 0.25 | 0.2857 | C |
| 28 | BICF2P239750            | 36834605 | G | 0.25 | 0.2857 | A |
| 28 | BICF2P998270            | 36855517 | A | 0    | 0      | G |
| 28 | BICF2P350272            | 36868572 | A | 0.25 | 0.2143 | G |
| 28 | BICF2P1062708           | 36872003 | G | 0    | 0      | A |
| 28 | TIGRP2P360839_rs9039405 | 36880809 | 0 | 0    | 0      | C |
| 28 | BICF2P355153            | 36893213 | A | 0.5  | 0.5    | C |
| 28 | BICF2P1393884           | 36903632 | A | 0.25 | 0.2143 | G |
| 28 | TIGRP2P360840_rs8703944 | 36923943 | 0 | 0    | 0      | C |
| 28 | BICF2S2308585           | 36927470 | G | 0.25 | 0.2857 | A |
| 28 | BICF2P638713            | 36940891 | A | 0.75 | 0.7857 | G |

|    |                         |          |   |      |        |   |
|----|-------------------------|----------|---|------|--------|---|
| 28 | BICF2S23745365          | 36958039 | A | 0    | 0      | G |
| 28 | BICF2P803288            | 36961070 | A | 0.5  | 0.5    | G |
| 28 | BICF2P603181            | 36973418 | C | 0    | 0      | A |
| 28 | BICF2P1439687           | 36995053 | A | 0    | 0      | G |
| 28 | BICF2P757342            | 36997533 | A | 0    | 0      | G |
| 28 | BICF2S23636216          | 37013223 | G | 0.25 | 0.2143 | A |
| 28 | BICF2P775352            | 37020849 | A | 0.25 | 0.2857 | G |
| 28 | BICF2S23117272          | 37045188 | A | 0.25 | 0.2857 | G |
| 28 | BICF2P127523            | 37054587 | 0 | 0    | 0      | G |
| 28 | BICF2G630265271         | 37074692 | A | 0.25 | 0.2857 | C |
| 28 | BICF2G630265268         | 37080395 | G | 0    | 0      | A |
| 28 | BICF2P1329011           | 37098501 | 0 | 0    | 0      | G |
| 28 | BICF2S23111761          | 37109177 | A | 0.25 | 0.2143 | G |
| 28 | BICF2G630265258         | 37123202 | A | 0    | 0      | G |
| 28 | BICF2G630265247         | 37139966 | A | 0.5  | 0.5714 | G |
| 28 | BICF2S23653305          | 37156263 | 0 | 0    | 0      | A |
| 28 | BICF2P1289759           | 37163570 | G | 0.25 | 0.2143 | A |
| 28 | BICF2S2333001           | 37176392 | A | 0.25 | 0.2143 | G |
| 28 | BICF2P1026497           | 37180386 | A | 0.5  | 0.5714 | G |
| 28 | BICF2G630265235         | 37196287 | C | 0    | 0      | G |
| 28 | BICF2G630265226         | 37211316 | A | 0.25 | 0.2143 | G |
| 28 | BICF2P163018            | 37218803 | 0 | 0    | 0      | G |
| 28 | BICF2G630265225         | 37231404 | A | 0    | 0      | C |
| 28 | BICF2G630265223         | 37242645 | A | 0    | 0      | G |
| 28 | BICF2G630265219         | 37250877 | 0 | 0    | 0      | C |
| 28 | TIGRP2P360848_rs8661529 | 37260994 | 0 | 0    | 0      | A |
| 28 | BICF2G630265194         | 37276538 | G | 0.75 | 0.7857 | A |
| 28 | BICF2G630265172         | 37283949 | A | 0    | 0      | C |
| 28 | BICF2G630265156         | 37297156 | G | 0    | 0      | A |
| 28 | BICF2G630265154         | 37310963 | G | 0.75 | 0.7857 | A |
| 28 | BICF2G630265152         | 37319362 | 0 | 0    | 0      | G |
| 28 | BICF2G630265133         | 37329168 | A | 0.25 | 0.2857 | C |
| 28 | BICF2S23031404          | 37330919 | C | 0    | 0      | G |
| 28 | BICF2G630265092         | 37363063 | A | 0    | 0      | G |
| 28 | BICF2G630265083         | 37370352 | A | 0    | 0      | G |
| 28 | BICF2G630265077         | 37379595 | A | 0    | 0      | G |
| 28 | BICF2S23612503          | 37395845 | C | 1    | 1      | A |
| 28 | BICF2S23426675          | 37406408 | G | 0.5  | 0.5    | C |
| 28 | BICF2G630265066         | 37422369 | G | 0.75 | 0.7143 | A |
| 28 | BICF2P1401321           | 37437033 | A | 0.25 | 0.2143 | G |
| 28 | BICF2G630265043         | 37450320 | A | 0.25 | 0.2143 | G |
| 28 | BICF2S2328913           | 37461725 | A | 0.75 | 0.7857 | C |
| 28 | BICF2P755709            | 37469033 | G | 0.25 | 0.2143 | C |
| 28 | BICF2G630264994         | 37479528 | G | 1    | 1      | A |
| 28 | BICF2G630264978         | 37497623 | A | 1    | 1      | G |
| 28 | BICF2S23641047          | 37506672 | A | 1    | 1      | C |
| 28 | BICF2G630264968         | 37514374 | A | 0.75 | 0.7857 | G |



|    |                         |          |   |      |        |   |
|----|-------------------------|----------|---|------|--------|---|
| 28 | BICF2G630264958         | 37528252 | A | 0.75 | 0.7857 | G |
| 28 | BICF2G630264944         | 37536540 | C | 0.75 | 0.7857 | A |
| 28 | BICF2S23034766          | 37569109 | A | 0.25 | 0.2143 | C |
| 28 | BICF2P1413863           | 37573269 | G | 0.25 | 0.2857 | A |
| 28 | BICF2P742592            | 37589623 | G | 0.5  | 0.5    | A |
| 28 | BICF2G630264910         | 37594019 | A | 0.5  | 0.5    | C |
| 28 | BICF2G630264897         | 37608164 | G | 0.75 | 0.7143 | A |
| 28 | BICF2P1432557           | 37634343 | 0 | 0    | 0      | A |
| 28 | BICF2S2351832           | 37642012 | C | 0.75 | 0.7857 | A |
| 28 | BICF2P838112            | 37656494 | A | 0    | 0      | C |
| 28 | BICF2S23332389          | 37674732 | A | 0.5  | 0.5    | C |
| 28 | BICF2G630264876         | 37694332 | G | 0    | 0      | A |
| 28 | BICF2G630264869         | 37699316 | G | 0.25 | 0.2857 | A |
| 28 | BICF2P560100            | 37708544 | G | 0.25 | 0.2857 | A |
| 28 | BICF2G630264825         | 37724484 | A | 0    | 0      | G |
| 28 | BICF2G630264813         | 37736059 | G | 0    | 0      | A |
| 28 | BICF2G630264800         | 37745398 | C | 0.5  | 0.5    | A |
| 28 | BICF2G630264790         | 37747712 | A | 0.25 | 0.2143 | G |
| 28 | BICF2P1175283           | 37764727 | G | 0.25 | 0.2143 | A |
| 28 | BICF2G630264768         | 37769876 | A | 0    | 0      | G |
| 28 | BICF2P1037207           | 37778219 | C | 0.5  | 0.5    | A |
| 28 | BICF2G630264728         | 37793664 | A | 0    | 0      | G |
| 28 | TIGRP2P360975_rs9063557 | 37806576 | A | 0.5  | 0.5    | G |
| 28 | BICF2S23733777          | 37812923 | C | 0    | 0      | A |
| 28 | BICF2G630264685         | 37831983 | 0 | 0    | 0      | G |
| 28 | BICF2P136198            | 37846056 | C | 0.25 | 0.2143 | G |
| 28 | BICF2G630264655         | 37846115 | A | 0    | 0      | G |
| 28 | BICF2P350450            | 37854605 | C | 0    | 0      | A |
| 28 | BICF2G630264628         | 37862512 | C | 0    | 0      | A |
| 28 | BICF2G630264617         | 37871361 | A | 0    | 0      | G |
| 28 | BICF2G630264584         | 37882118 | A | 0    | 0      | G |
| 28 | BICF2G630264568         | 37892955 | A | 0    | 0      | G |
| 28 | BICF2G630264519         | 37904618 | G | 0.25 | 0.2857 | C |
| 28 | BICF2S23048076          | 37912111 | A | 0.25 | 0.2857 | G |
| 28 | BICF2G630264498         | 37916002 | A | 0    | 0      | C |
| 28 | BICF2G630264476         | 37935653 | A | 0.25 | 0.2857 | G |
| 28 | BICF2P291863            | 37948553 | 0 | 0    | 0      | A |
| 28 | BICF2G630264459         | 37954408 | A | 0    | 0      | G |
| 28 | BICF2S23034184          | 37971600 | G | 0.5  | 0.5    | C |
| 28 | TIGRP2P361023_rs8831280 | 37978739 | A | 0.25 | 0.2857 | G |
| 28 | BICF2P714195            | 37988311 | G | 0.25 | 0.2143 | A |
| 28 | TIGRP2P361037_rs8847281 | 37997882 | 0 | 0    | 0      | G |
| 28 | BICF2P225352            | 38016529 | G | 0.5  | 0.4286 | C |
| 28 | BICF2G630264431         | 38018900 | A | 0.5  | 0.4286 | T |
| 28 | BICF2G630264430         | 38027571 | G | 0    | 0      | A |
| 28 | BICF2G630264423         | 38030664 | A | 0.5  | 0.5714 | G |
| 28 | BICF2G630264394         | 38048348 | G | 0    | 0      | A |

|    |                         |          |   |      |        |   |
|----|-------------------------|----------|---|------|--------|---|
| 28 | BICF2G630264393         | 38053906 | 0 | 0    | 0      | G |
| 28 | BICF2G630264385         | 38067478 | A | 0    | 0      | C |
| 28 | BICF2P650372            | 38087921 | G | 1    | 1      | A |
| 28 | BICF2P1226838           | 38104148 | A | 0.25 | 0.3571 | G |
| 28 | BICF2G630264364         | 38113112 | A | 0    | 0      | C |
| 28 | BICF2G630264357         | 38123635 | G | 0.25 | 0.3571 | A |
| 28 | BICF2S23630804          | 38133107 | A | 0    | 0      | G |
| 28 | BICF2P616883            | 38133152 | A | 0    | 0      | G |
| 28 | BICF2P135539            | 38138200 | A | 0    | 0      | C |
| 28 | BICF2G630264327         | 38152495 | A | 0    | 0      | G |
| 28 | BICF2G630264320         | 38158269 | A | 0.25 | 0.2143 | G |
| 28 | BICF2G630264297         | 38171954 | 0 | 0    | 0      | A |
| 28 | BICF2P514006            | 38174178 | A | 0    | 0      | C |
| 28 | BICF2G630264289         | 38180124 | G | 0.25 | 0.2143 | A |
| 28 | BICF2G630264258         | 38191704 | 0 | 0    | 0      | G |
| 28 | BICF2P16082             | 38204927 | 0 | 0    | 0      | T |
| 28 | BICF2G630264224         | 38221016 | A | 0.25 | 0.3571 | C |
| 28 | BICF2G630264222         | 38228648 | A | 0.75 | 0.6429 | G |
| 28 | BICF2G630264213         | 38238613 | A | 1    | 1      | G |
| 28 | BICF2P579545            | 38251507 | 0 | 0    | 0      | A |
| 28 | BICF2G630264188         | 38263379 | C | 0.5  | 0.4286 | A |
| 28 | BICF2G630264171         | 38272306 | G | 0.75 | 0.7857 | A |
| 28 | BICF2P163793            | 38285421 | G | 0    | 0      | A |
| 28 | BICF2P99063             | 38305529 | 0 | 0    | 0      | A |
| 28 | BICF2P722756            | 38314074 | A | 0    | 0      | G |
| 28 | TIGRP2P361141_rs8490900 | 38318564 | G | 0    | 0      | A |
| 28 | BICF2G630264141         | 38331252 | G | 0    | 0      | A |
| 28 | BICF2G630264129         | 38341634 | G | 0    | 0      | A |
| 28 | BICF2G630264112         | 38352521 | A | 0    | 0      | C |
| 28 | BICF2P1070875           | 38373735 | A | 0.5  | 0.4286 | G |
| 28 | BICF2G630264051         | 38382139 | G | 0.75 | 0.8333 | A |
| 28 | BICF2P952107            | 38389442 | C | 0    | 0      | G |
| 28 | BICF2S23525520          | 38396806 | A | 0.5  | 0.5714 | G |
| 28 | BICF2G630264036         | 38402035 | G | 0    | 0      | A |
| 28 | BICF2S2346889           | 38407116 | A | 0    | 0      | C |
| 28 | BICF2G630263995         | 38413000 | A | 0    | 0      | G |
| 28 | BICF2G630263971         | 38425302 | A | 0.5  | 0.4286 | G |
| 28 | BICF2S23440940          | 38439001 | G | 0.5  | 0.4286 | A |
| 28 | BICF2G630263945         | 38453804 | A | 0    | 0      | G |
| 28 | BICF2S23454566          | 38460604 | A | 0.25 | 0.3571 | G |
| 28 | TIGRP2P361201_rs8812087 | 38470428 | 0 | 0    | 0      | G |
| 28 | TIGRP2P361208_rs8563253 | 38485700 | A | 0    | 0      | G |
| 28 | BICF2S23431929          | 38490901 | A | 0    | 0      | G |
| 28 | BICF2P629275            | 38510039 | A | 0.75 | 0.6429 | G |
| 28 | BICF2S23526546          | 38520162 | A | 0.75 | 0.6429 | G |
| 28 | BICF2P551741            | 38526225 | A | 0    | 0      | G |
| 28 | BICF2G630263898         | 38537644 | A | 0    | 0      | G |

|    |                         |          |   |      |        |   |
|----|-------------------------|----------|---|------|--------|---|
| 28 | BICF2G630263897         | 38537991 | A | 0.25 | 0.3571 | G |
| 28 | BICF2G630263847         | 38563586 | G | 0.25 | 0.3571 | A |
| 28 | BICF2P1031141           | 38572746 | G | 0.25 | 0.2143 | A |
| 28 | BICF2G630263830         | 38578335 | A | 0.75 | 0.6429 | C |
| 28 | BICF2G630263822         | 38583868 | A | 0.75 | 0.6429 | G |
| 28 | BICF2G630263805         | 38588108 | A | 0    | 0      | G |
| 28 | BICF2G630263797         | 38599937 | G | 0.75 | 0.7857 | A |
| 28 | TIGRP2P361272_rs8748172 | 38611675 | G | 1    | 0.8333 | A |
| 28 | BICF2G630263742         | 38627751 | A | 0.5  | 0.4286 | T |
| 28 | BICF2G630263736         | 38628567 | A | 0.75 | 0.7857 | G |
| 28 | BICF2G630263686         | 38649738 | G | 0.25 | 0.3571 | A |
| 28 | BICF2S23527706          | 38650375 | G | 0.25 | 0.3571 | A |
| 28 | BICF2G630263680         | 38652981 | A | 0    | 0      | G |
| 28 | TIGRP2P361309_rs8898866 | 38663637 | G | 0    | 0      | A |
| 28 | TIGRP2P361314_rs9017812 | 38676529 | G | 0    | 0      | A |
| 28 | BICF2G630263599         | 38689587 | G | 0.25 | 0.3571 | A |
| 28 | BICF2G630263593         | 38692554 | A | 0.25 | 0.3571 | G |
| 28 | BICF2G630263592         | 38692572 | A | 0.25 | 0.3571 | G |
| 28 | BICF2G630263591         | 38692805 | C | 0.25 | 0.3571 | G |
| 28 | BICF2G630263575         | 38698032 | C | 0.25 | 0.3571 | A |
| 28 | BICF2G630263556         | 38709005 | A | 0.75 | 0.7857 | C |
| 28 | BICF2S23720339          | 38714042 | G | 0.75 | 0.7857 | A |
| 28 | BICF2S23720341          | 38714121 | C | 0.75 | 0.7857 | A |
| 28 | BICF2P436289            | 38714578 | A | 0.25 | 0.3571 | C |
| 28 | BICF2P735544            | 38731292 | A | 0.75 | 0.7857 | G |
| 28 | BICF2G630263495         | 38737810 | A | 0.25 | 0.2143 | G |
| 28 | BICF2G630263466         | 38747240 | A | 0.5  | 0.5714 | G |
| 28 | BICF2P318642            | 38775076 | A | 0.25 | 0.3571 | C |
| 28 | BICF2P106457            | 38778959 | C | 0.25 | 0.3571 | A |
| 28 | TIGRP2P361374_rs9225192 | 38789915 | C | 0.5  | 0.4286 | A |
| 28 | BICF2G630263337         | 38809083 | A | 0.25 | 0.3571 | G |
| 28 | BICF2G630263334         | 38812544 | G | 0    | 0.1    | A |
| 28 | TIGRP2P361388_rs9240604 | 38834439 | A | 0.5  | 0.4286 | G |
| 28 | BICF2G630263281         | 38844060 | A | 0    | 0      | G |
| 28 | BICF2P220586            | 38858192 | A | 0.75 | 0.7857 | G |
| 28 | TIGRP2P361398_rs9136279 | 38858978 | G | 0.25 | 0.2143 | A |
| 28 | BICF2P1226007           | 38875427 | G | 0    | 0      | C |
| 28 | BICF2G630263218         | 38897845 | G | 0.25 | 0.2143 | A |
| 28 | BICF2G630263206         | 38920948 | A | 1    | 1      | G |
| 28 | BICF2G630263196         | 38925855 | A | 0    | 0      | G |
| 28 | BICF2G630263187         | 38936419 | G | 0    | 0      | A |
| 28 | BICF2G630263181         | 38942985 | A | 0    | 0      | G |
| 28 | TIGRP2P361453_rs9118227 | 38945584 | A | 0    | 0      | G |
| 28 | BICF2G630263165         | 38953428 | A | 0.25 | 0.2143 | G |
| 28 | BICF2P654856            | 38964136 | A | 0    | 0      | G |
| 28 | BICF2G630263157         | 38973955 | A | 0    | 0      | G |
| 28 | TIGRP2P361464_rs9100179 | 38992577 | G | 0.25 | 0.2143 | A |

|    |                         |          |   |      |        |   |
|----|-------------------------|----------|---|------|--------|---|
| 28 | BICF2G630263134         | 38997394 | A | 0    | 0      | G |
| 28 | BICF2G630263101         | 39008336 | G | 0    | 0      | A |
| 28 | BICF2S23729722          | 39011962 | G | 0.25 | 0.2143 | A |
| 28 | TIGRP2P361487_rs8580784 | 39029594 | A | 0    | 0      | G |
| 28 | TIGRP2P361489_rs9084404 | 39031026 | A | 0    | 0      | G |
| 28 | BICF2P1375273           | 39043376 | A | 0.25 | 0.2143 | C |
| 28 | BICF2G630263061         | 39044552 | G | 0.25 | 0.2143 | A |
| 28 | BICF2G630263047         | 39056763 | G | 0.5  | 0.4286 | A |
| 28 | BICF2P1380961           | 39066688 | G | 0.5  | 0.4286 | A |
| 28 | BICF2P134239            | 39072487 | G | 0    | 0      | A |
| 28 | BICF2G630263043         | 39082068 | A | 0    | 0      | C |
| 28 | BICF2P906123            | 39088637 | A | 0    | 0      | G |
| 28 | BICF2P766837            | 39105294 | C | 0    | 0      | A |
| 28 | BICF2G630263026         | 39114287 | G | 0.75 | 0.6429 | A |
| 28 | BICF2S23417138          | 39123644 | A | 0.75 | 0.6429 | G |
| 28 | BICF2S23418032          | 39126915 | A | 0.75 | 0.6429 | G |
| 28 | BICF2G630263012         | 39129076 | G | 0.75 | 0.6429 | A |
| 28 | BICF2G630263010         | 39129691 | G | 0.75 | 0.6429 | A |
| 28 | BICF2G630263002         | 39143609 | A | 0    | 0      | C |
| 28 | BICF2G630262999         | 39146613 | G | 0    | 0      | A |
| 28 | TIGRP2P361534_rs8989367 | 39162445 | A | 0    | 0      | C |
| 28 | BICF2P1465474           | 39173519 | A | 0    | 0      | G |
| 28 | BICF2P772776            | 39184420 | A | 0    | 0      | G |
| 28 | TIGRP2P361550_rs8750817 | 39198521 | G | 0    | 0      | A |
| 28 | BICF2G630262993         | 39211211 | A | 0    | 0      | G |
| 28 | BICF2P415505            | 39215515 | G | 0.25 | 0.3571 | A |
| 28 | BICF2G630262983         | 39233566 | A | 0.25 | 0.2857 | T |
| 28 | BICF2G630262947         | 39245383 | G | 0.25 | 0.2857 | A |
| 28 | BICF2P798507            | 39257921 | G | 0.25 | 0.2857 | A |
| 28 | BICF2G630262927         | 39262797 | C | 0.25 | 0.2857 | A |
| 28 | BICF2P1424299           | 39277956 | G | 1    | 1      | A |
| 28 | BICF2G630262904         | 39284700 | G | 0.75 | 0.7857 | A |
| 28 | BICF2G630262853         | 39301436 | C | 0.5  | 0.5    | A |
| 28 | BICF2G630262851         | 39302800 | C | 0.5  | 0.5    | A |
| 28 | BICF2G630262849         | 39303112 | A | 1    | 1      | G |
| 28 | BICF2G630262840         | 39316580 | A | 0    | 0      | G |
| 28 | BICF2P1026500           | 39320501 | A | 0    | 0      | G |
| 28 | TIGRP2P361603_rs8725986 | 39341572 | A | 0.25 | 0.2857 | G |
| 28 | BICF2G630262753         | 39353547 | G | 0    | 0      | A |
| 28 | BICF2G630262729         | 39369138 | A | 0.5  | 0.5    | G |
| 28 | BICF2G630262711         | 39376750 | G | 0    | 0      | A |
| 28 | BICF2P929579            | 39393388 | A | 0    | 0      | G |
| 28 | BICF2G630262650         | 39410179 | G | 0.5  | 0.6429 | A |
| 28 | BICF2G630262644         | 39411946 | A | 0.5  | 0.6429 | G |
| 28 | BICF2P31405             | 39426178 | A | 0    | 0      | G |
| 28 | BICF2G630262586         | 39439143 | G | 0.5  | 0.5    | A |
| 28 | BICF2G630262573         | 39441389 | G | 0.5  | 0.5    | A |

|    |                         |          |   |      |        |   |
|----|-------------------------|----------|---|------|--------|---|
| 28 | BICF2S23347840          | 39456154 | G | 0.25 | 0.2143 | A |
| 28 | BICF2G630262563         | 39457850 | A | 0.25 | 0.2143 | G |
| 28 | TIGRP2P361639_rs8906323 | 39469815 | A | 0    | 0      | G |
| 28 | BICF2P493139            | 39482612 | A | 0    | 0      | G |
| 28 | BICF2P1063448           | 39495116 | A | 0    | 0      | G |
| 28 | TIGRP2P361651_rs8929416 | 39507168 | A | 0.25 | 0.2857 | G |
| 28 | BICF2G630262508         | 39515910 | G | 0.25 | 0.2143 | A |
| 28 | BICF2G630262491         | 39527508 | A | 0.25 | 0.2143 | G |
| 28 | TIGRP2P361660_rs8999693 | 39546699 | A | 0.25 | 0.2857 | G |
| 28 | BICF2P946956            | 39549405 | A | 0    | 0      | G |
| 28 | BICF2P630930            | 39567309 | A | 0    | 0      | G |
| 28 | BICF2P1296654           | 39574956 | G | 0    | 0      | A |
| 28 | BICF2G630262479         | 39576434 | A | 0.5  | 0.5    | G |
| 28 | BICF2G630262435         | 39593405 | G | 1    | 1      | A |
| 28 | BICF2G630262429         | 39596581 | 0 | 0    | 0      | C |
| 28 | BICF2S2459095           | 39613352 | A | 0.5  | 0.5    | G |
| 28 | BICF2G630262411         | 39630494 | 0 | 0    | 0      | G |
| 28 | BICF2G630262395         | 39641104 | A | 0    | 0      | G |
| 28 | TIGRP2P361731_rs9068888 | 39652036 | A | 0.25 | 0.2857 | G |
| 28 | BICF2G630262345         | 39663980 | A | 0.25 | 0.2143 | G |
| 28 | BICF2P845413            | 39686467 | C | 0.75 | 0.7857 | A |
| 28 | TIGRP2P361762_rs8887383 | 39695991 | G | 0.25 | 0.2857 | C |
| 28 | TIGRP2P361769_rs8616678 | 39700539 | A | 0.5  | 0.5    | G |
| 28 | BICF2S23723350          | 39719707 | G | 0    | 0      | A |
| 28 | TIGRP2P361792_rs9149567 | 39725648 | A | 0    | 0      | G |
| 28 | TIGRP2P361818_rs8944829 | 39743635 | G | 1    | 1      | A |
| 28 | TIGRP2P361822_rs8592882 | 39752857 | A | 0    | 0      | C |
| 28 | BICF2P1270969           | 39759246 | A | 0.25 | 0.2857 | G |
| 28 | BICF2G630262289         | 39767415 | A | 0.5  | 0.5714 | C |
| 28 | BICF2G630262287         | 39789117 | 0 | 0    | 0      | G |
| 28 | BICF2P710791            | 39797691 | A | 0.5  | 0.5    | T |
| 28 | BICF2G630262266         | 39797816 | G | 0.25 | 0.2143 | A |
| 28 | BICF2P1211199           | 39809917 | G | 0.25 | 0.2857 | C |
| 28 | BICF2G630262248         | 39816952 | G | 0.5  | 0.4286 | A |
| 28 | TIGRP2P361840_rs9016357 | 39828046 | A | 0.25 | 0.2857 | G |
| 28 | BICF2S23641634          | 39837589 | G | 0.25 | 0.2857 | A |
| 28 | BICF2G630262177         | 39852915 | G | 0    | 0      | A |
| 28 | BICF2S23539397          | 39855680 | G | 0    | 0      | A |
| 28 | BICF2G630262157         | 39864638 | A | 0    | 0      | G |
| 28 | BICF2P32057             | 39873314 | 0 | 0    | 0      | A |
| 28 | BICF2G630262149         | 39888427 | G | 0.25 | 0.2143 | A |
| 28 | BICF2G630262146         | 39896884 | G | 0.5  | 0.5    | A |
| 28 | BICF2S23531693          | 39912752 | G | 0.5  | 0.4167 | A |
| 28 | BICF2P664787            | 39919735 | G | 0    | 0      | A |
| 28 | BICF2P327858            | 39935167 | G | 0.25 | 0.2857 | A |
| 28 | BICF2G630262110         | 39940868 | A | 1    | 1      | G |
| 28 | BICF2P402513            | 39952546 | A | 0.25 | 0.2857 | G |

|    |                         |          |   |      |        |   |
|----|-------------------------|----------|---|------|--------|---|
| 28 | BICF2G630262050         | 39962017 | A | 0.5  | 0.5    | G |
| 28 | BICF2P374965            | 39966340 | A | 0    | 0      | G |
| 28 | BICF2G630262030         | 39966446 | A | 0.75 | 0.7857 | G |
| 28 | BICF2P658539            | 39984906 | A | 0    | 0      | C |
| 28 | BICF2G630261985         | 39985830 | A | 0.5  | 0.5    | G |
| 28 | BICF2P1291551           | 40004086 | 0 | 0    | 0      | C |
| 28 | BICF2P657927            | 40008635 | A | 0    | 0      | G |
| 28 | BICF2P857428            | 40020222 | A | 0.5  | 0.5    | G |
| 28 | BICF2S2335711           | 40032052 | A | 0.5  | 0.5714 | G |
| 28 | BICF2P41924             | 40051509 | 0 | 0    | 0      | G |
| 28 | BICF2P926694            | 40064530 | A | 0    | 0      | T |
| 28 | BICF2G630261832         | 40082910 | A | 0    | 0.1667 | G |
| 28 | BICF2G630261813         | 40089814 | C | 0    | 0      | A |
| 28 | BICF2G630261787         | 40100670 | G | 0.75 | 0.7143 | A |
| 28 | BICF2P774701            | 40114047 | G | 0.75 | 0.7143 | A |
| 28 | TIGRP2P361954_rs8579423 | 40130484 | A | 0.25 | 0.2857 | G |
| 28 | BICF2P488169            | 40138626 | C | 0.5  | 0.5    | A |
| 28 | TIGRP2P361965_rs8856415 | 40148337 | A | 0.5  | 0.5    | G |
| 28 | BICF2G630261762         | 40167761 | A | 0.25 | 0.2857 | G |
| 28 | TIGRP2P361968_rs8859115 | 40175752 | A | 0.25 | 0.2857 | G |
| 28 | BICF2S23651287          | 40187828 | A | 0.5  | 0.5    | G |
| 28 | TIGRP2P361980_rs8676652 | 40199843 | 0 | 0    | 0      | C |
| 28 | BICF2P1293215           | 40206134 | A | 0.5  | 0.5    | G |
| 28 | BICF2G630261742         | 40215540 | A | 0    | 0      | G |
| 28 | BICF2G630261705         | 40234283 | A | 0.5  | 0.5714 | G |
| 28 | BICF2G630261641         | 40252946 | G | 0.25 | 0.2143 | A |
| 28 | BICF2P1132306           | 40262544 | G | 0.5  | 0.5714 | A |
| 28 | BICF2G630261607         | 40262818 | A | 0.5  | 0.5714 | G |
| 28 | BICF2G630261564         | 40276068 | A | 0.5  | 0.5714 | G |
| 28 | BICF2G630261545         | 40285434 | A | 0    | 0      | G |
| 28 | BICF2G630261505         | 40299190 | A | 0.5  | 0.4286 | G |
| 28 | BICF2G630261501         | 40310272 | 0 | 0    | 0      | A |
| 28 | BICF2P271841            | 40310530 | A | 0.75 | 0.7143 | G |
| 28 | BICF2G630261469         | 40323820 | T | 0.5  | 0.5714 | A |
| 28 | BICF2G630261452         | 40331000 | G | 0    | 0      | A |
| 28 | BICF2G630261417         | 40344904 | G | 0.75 | 0.7857 | A |
| 28 | BICF2S23747706          | 40353827 | G | 0.5  | 0.5    | A |
| 28 | BICF2G630261348         | 40365993 | A | 0.5  | 0.5    | G |
| 28 | BICF2G630261336         | 40383267 | 0 | 0    | 0      | G |
| 28 | BICF2P1166776           | 40397736 | A | 0.25 | 0.2857 | G |
| 28 | BICF2G630261334         | 40404322 | G | 0.75 | 0.7857 | A |
| 28 | BICF2G630261319         | 40421149 | G | 0.5  | 0.5    | A |
| 28 | BICF2G630261311         | 40424130 | G | 0.5  | 0.5    | A |
| 28 | BICF2P392926            | 40435562 | 0 | 0    | 0      | G |
| 28 | BICF2G630261295         | 40450495 | A | 0    | 0      | G |
| 28 | BICF2S23247051          | 40459073 | G | 0    | 0      | A |
| 28 | BICF2G630261292         | 40469231 | A | 0    | 0      | G |

|    |                         |          |   |      |        |   |
|----|-------------------------|----------|---|------|--------|---|
| 28 | BICF2P650993            | 40488776 | 0 | 0    | 0      | A |
| 28 | BICF2G630261289         | 40495217 | G | 0.25 | 0.2143 | A |
| 28 | BICF2G630261271         | 40505070 | A | 0    | 0      | G |
| 28 | BICF2G630261232         | 40515169 | 0 | 0    | 0      | G |
| 28 | BICF2G630261206         | 40547247 | G | 0.25 | 0.2857 | A |
| 28 | BICF2G630261193         | 40551051 | G | 0.75 | 0.7857 | A |
| 28 | TIGRP2P362028_rs9145750 | 40564540 | A | 1    | 1      | C |
| 28 | BICF2P1468079           | 40567398 | A | 0.75 | 0.7857 | C |
| 28 | BICF2P1468073           | 40568182 | A | 0.25 | 0.2143 | G |
| 28 | BICF2G630261128         | 40580119 | G | 0.25 | 0.2857 | A |
| 28 | BICF2P37121             | 40584660 | G | 0    | 0      | A |
| 28 | BICF2G630261111         | 40589203 | G | 1    | 1      | A |
| 28 | BICF2G630261106         | 40590098 | G | 0.75 | 0.7857 | A |
| 28 | BICF2P3199              | 40597161 | C | 0.75 | 0.7857 | G |
| 28 | BICF2P723743            | 40603365 | A | 0.75 | 0.7857 | G |
| 28 | BICF2P58860             | 40606650 | A | 0.25 | 0.2143 | G |
| 28 | BICF2G630261096         | 40622558 | A | 0    | 0      | G |
| 28 | BICF2G630261084         | 40631269 | 0 | 0    | 0      | G |
| 28 | BICF2G630261081         | 40645962 | C | 0    | 0      | A |
| 28 | BICF2G630261070         | 40662316 | A | 0    | 0      | G |
| 28 | BICF2G630261069         | 40671620 | A | 0.25 | 0.2857 | G |
| 28 | BICF2G630261064         | 40678774 | A | 0.75 | 0.7143 | G |
| 28 | BICF2S2301402           | 40691886 | A | 0    | 0      | G |
| 28 | BICF2P67993             | 40701951 | A | 0    | 0      | G |
| 28 | BICF2G630261029         | 40707778 | 0 | 0    | 0      | C |
| 28 | BICF2G630261014         | 40716505 | A | 0    | 0      | G |
| 28 | BICF2G630260965         | 40728053 | A | 0.5  | 0.5    | C |
| 28 | BICF2G630260964         | 40728347 | C | 0    | 0      | A |
| 28 | BICF2P497424            | 40733010 | G | 0.25 | 0.2143 | A |
| 28 | BICF2G630260940         | 40744525 | A | 0.25 | 0.2143 | G |
| 28 | BICF2S23732162          | 40765391 | 0 | 0    | 0      | G |
| 28 | BICF2G630260880         | 40769448 | A | 1    | 1      | G |
| 28 | BICF2P1167325           | 40783821 | G | 0.5  | 0.5    | A |
| 28 | BICF2G630260784         | 40796161 | A | 0.5  | 0.5    | G |
| 28 | BICF2G630260755         | 40810528 | A | 1    | 1      | G |
| 28 | BICF2G630260741         | 40817225 | G | 0.5  | 0.5    | A |
| 28 | BICF2P746289            | 40827016 | A | 1    | 1      | C |
| 28 | BICF2S23354783          | 40837183 | 0 | 0    | 0      | G |
| 28 | BICF2S23038218          | 40865270 | A | 0    | 0      | G |
| 28 | BICF2G630260703         | 40879288 | A | 0    | 0      | G |
| 28 | BICF2P1439179           | 40882412 | C | 0    | 0      | A |
| 28 | BICF2G630260701         | 40883745 | G | 0    | 0      | A |
| 28 | BICF2G630260686         | 40894623 | G | 1    | 1      | A |
| 28 | BICF2G630260657         | 40906891 | A | 0    | 0      | G |
| 28 | BICF2S23731107          | 40923700 | A | 0    | 0      | G |
| 28 | BICF2G630260610         | 40933345 | G | 0    | 0      | A |
| 28 | BICF2G630260602         | 40940451 | A | 0.25 | 0.2143 | G |

|    |                         |          |   |      |        |   |
|----|-------------------------|----------|---|------|--------|---|
| 28 | BICF2G630260560         | 40956291 | A | 0.75 | 0.7143 | G |
| 28 | BICF2G630260535         | 40963745 | G | 0.25 | 0.2143 | A |
| 28 | BICF2G630260475         | 40983439 | G | 0.5  | 0.5    | A |
| 28 | BICF2G630260463         | 40986523 | G | 0    | 0      | A |
| 28 | BICF2G630260415         | 41002639 | G | 1    | 1      | A |
| 28 | BICF2G630260414         | 41003354 | G | 0    | 0      | A |
| 28 | BICF2G630260409         | 41012384 | A | 0    | 0      | G |
| 28 | BICF2G630260373         | 41032458 | A | 0.5  | 0.5    | G |
| 28 | BICF2G630260340         | 41052407 | G | 0    | 0      | A |
| 28 | BICF2G630260337         | 41056313 | A | 0.25 | 0.2143 | C |
| 28 | BICF2G630260313         | 41072011 | A | 0.25 | 0.2857 | G |
| 28 | BICF2G630260302         | 41080333 | A | 0.25 | 0.2143 | G |
| 28 | TIGRP2P362153_rs8878811 | 41093805 | A | 0    | 0      | G |
| 28 | BICF2G630260252         | 41105630 | G | 0.5  | 0.5    | C |
| 28 | BICF2G630260248         | 41107224 | G | 0.5  | 0.5    | A |
| 28 | BICF2P240943            | 41119831 | G | 1    | 1      | A |
| 28 | BICF2P1245201           | 41133714 | G | 0.75 | 0.7857 | A |
| 28 | BICF2G630260211         | 41135732 | T | 0.25 | 0.2857 | A |
| 28 | BICF2G630260205         | 41156893 | A | 0.25 | 0.1667 | C |
| 28 | BICF2G630260174         | 41162422 | 0 | 0    | 0      | A |
| 28 | BICF2G630260150         | 41173104 | A | 0    | 0      | G |
| 28 | BICF2S23434957          | 41182690 | 0 | 0    | 0      | A |
| 28 | BICF2G630260105         | 41197747 | A | 0.25 | 0.2857 | G |
| 28 | BICF2G630260078         | 41208857 | 0 | 0    | 0      | G |
| 28 | BICF2P1107247           | 41217532 | G | 0.75 | 0.7143 | A |
| 28 | TIGRP2P362187_rs9255282 | 41229690 | A | 0    | 0      | C |
| 28 | BICF2G630260041         | 41244026 | A | 0    | 0      | G |
| 28 | BICF2G630260032         | 41251344 | A | 0.25 | 0.2857 | G |
| 28 | BICF2G630260018         | 41263626 | 0 | 0    | 0      | G |
| 28 | BICF2G630259991         | 41276926 | T | 0.75 | 0.7857 | A |
| 28 | BICF2P364701            | 41287029 | G | 0.5  | 0.5    | A |
| 28 | BICF2G630259959         | 41288470 | C | 0.5  | 0.5    | A |
| 28 | BICF2G630259958         | 41288585 | A | 0.5  | 0.5    | T |
| 28 | BICF2G630259926         | 41296703 | A | 0.25 | 0.2857 | G |
| 28 | BICF2G630259892         | 41314783 | A | 0.25 | 0.2857 | G |
| 28 | BICF2G630259877         | 41320453 | G | 0    | 0      | A |
| 28 | BICF2G630259843         | 41337416 | A | 0.25 | 0.2857 | G |
| 28 | BICF2G630259833         | 41349081 | G | 0.25 | 0.25   | A |
| 28 | BICF2G630259827         | 41353476 | A | 0.25 | 0.2857 | G |
| 28 | BICF2G630259819         | 41356297 | A | 0.25 | 0.2857 | G |
| 28 | TIGRP2P362234_rs8770078 | 41376035 | A | 0    | 0      | G |
| 28 | BICF2S23346408          | 41377128 | G | 0    | 0      | A |
| 28 | BICF2P1161679           | 41389419 | A | 0    | 0      | G |
| 28 | BICF2G630259802         | 41402983 | A | 0.25 | 0.2857 | G |
| 28 | BICF2G630259793         | 41412696 | G | 0.25 | 0.2857 | A |
| 28 | BICF2P1036553           | 41415228 | A | 0    | 0      | G |
| 28 | BICF2G630259779         | 41415372 | A | 0.25 | 0.2857 | G |



|    |                         |          |   |      |        |   |
|----|-------------------------|----------|---|------|--------|---|
| 28 | BICF2G630259764         | 41424237 | C | 0.5  | 0.5    | A |
| 28 | BICF2G630259703         | 41434951 | A | 0.75 | 0.7857 | G |
| 28 | BICF2G630259674         | 41449329 | A | 0    | 0      | C |
| 28 | BICF2G630259643         | 41464790 | A | 0    | 0      | G |
| 28 | TIGRP2P362292_rs9041585 | 41477443 | A | 0    | 0      | G |
| 28 | BICF2G630259627         | 41482888 | A | 0    | 0      | G |
| 28 | BICF2P293847            | 41501632 | A | 0    | 0      | G |
| 28 | TIGRP2P362302_rs8991720 | 41505065 | A | 0.75 | 0.7857 | G |
| 28 | BICF2P705027            | 41526414 | G | 0    | 0      | A |
| 28 | BICF2S23748326          | 41530926 | G | 0    | 0      | A |
| 28 | BICF2P517890            | 41544730 | A | 0    | 0      | G |
| 28 | BICF2S22960429          | 41563740 | A | 0.5  | 0.5    | G |
| 28 | BICF2P1187917           | 41573326 | A | 0    | 0      | G |
| 28 | BICF2P1262965           | 41585225 | G | 0.75 | 0.8333 | A |
| 28 | TIGRP2P362346_rs8778509 | 41598014 | G | 0.75 | 0.7143 | A |
| 28 | BICF2P388832            | 41611603 | A | 0.25 | 0.2143 | C |
| 28 | BICF2S23618939          | 41620455 | G | 0    | 0      | A |
| 28 | TIGRP2P362380_rs8838495 | 41630607 | A | 0    | 0      | G |
| 28 | BICF2P255051            | 41650139 | G | 0    | 0      | A |
| 28 | BICF2P788190            | 41653666 | A | 0    | 0      | G |
| 28 | BICF2P788189            | 41653815 | A | 0    | 0      | G |
| 28 | TIGRP2P362412_rs8779599 | 41666444 | A | 0.25 | 0.2857 | C |
| 28 | BICF2P576277            | 41678220 | C | 0    | 0      | A |
| 28 | TIGRP2P362416_rs8916571 | 41704669 | G | 0.25 | 0.2143 | A |
| 28 | BICF2P1079903           | 41715724 | C | 0    | 0      | A |
| 28 | BICF2P1085732           | 41723412 | G | 0.25 | 0.2857 | C |
| 28 | BICF2P321920            | 41744622 | C | 0.25 | 0.2857 | A |
| 28 | BICF2P734258            | 41748518 | A | 0    | 0      | G |
| 28 | BICF2P1047374           | 41763199 | G | 1    | 1      | A |
| 28 | BICF2P518077            | 41776897 | A | 0    | 0      | C |
| 28 | BICF2P445913            | 41786180 | A | 0.75 | 0.7143 | G |
| 28 | BICF2S23434575          | 41798149 | A | 0.5  | 0.5    | G |
| 28 | BICF2S23329008          | 41811189 | G | 0.25 | 0.2143 | A |
| 28 | TIGRP2P362468_rs8509322 | 41823779 | A | 0    | 0      | G |
| 28 | BICF2S22952777          | 41826012 | A | 0.25 | 0.2143 | G |
| 28 | BICF2P1280630           | 41840621 | A | 0    | 0      | G |
| 28 | TIGRP2P362507_rs8651898 | 41854518 | A | 0.5  | 0.5    | G |
| 28 | BICF2P869385            | 41860161 | C | 0.25 | 0.2143 | G |
| 28 | TIGRP2P362535_rs9130694 | 41882610 | A | 1    | 1      | G |
| 28 | BICF2P1404751           | 41903132 | G | 1    | 1      | A |
| 28 | BICF2S2368543           | 41911160 | G | 1    | 1      | A |
| 28 | BICF2S2295363           | 41919478 | A | 0.75 | 0.7857 | C |
| 28 | BICF2P238890            | 41937074 | G | 0    | 0      | A |
| 28 | BICF2P100315            | 41941213 | G | 0.5  | 0.5    | A |
| 28 | TIGRP2P362575_rs8653039 | 41958979 | G | 0.5  | 0.5    | A |
| 28 | BICF2P523477            | 41967791 | G | 0.5  | 0.5    | A |
| 28 | TIGRP2P362600_rs9241234 | 41981014 | A | 0    | 0      | G |

|    |                         |          |   |      |        |   |
|----|-------------------------|----------|---|------|--------|---|
| 28 | BICF2S23626060          | 41989028 | A | 0.5  | 0.5    | G |
| 28 | BICF2P367772            | 42001944 | A | 0    | 0      | G |
| 28 | BICF2S23442653          | 42015597 | G | 0    | 0      | A |
| 28 | BICF2P988967            | 42021588 | G | 0    | 0      | A |
| 28 | BICF2P649106            | 42041699 | G | 0    | 0      | A |
| 28 | BICF2P649115            | 42042910 | G | 0    | 0      | A |
| 28 | BICF2S23640424          | 42049349 | 0 | 0    | 0      | G |
| 28 | BICF2P154704            | 42056126 | 0 | 0    | 0      | G |
| 28 | BICF2P832870            | 42072614 | A | 0    | 0      | G |
| 28 | BICF2P1122620           | 42078144 | G | 0    | 0      | A |
| 28 | TIGRP2P362659_rs9063950 | 42084269 | 0 | 0    | 0      | G |
| 28 | BICF2S23157651          | 42091022 | A | 0    | 0      | G |
| 28 | BICF2P362568            | 42107191 | A | 0    | 0      | G |
| 28 | TIGRP2P362677_rs8985672 | 42126889 | C | 0.25 | 0.2143 | A |
| 28 | BICF2P47181             | 42135147 | 0 | 0    | 0      | G |
| 28 | BICF2P47189             | 42136594 | A | 0    | 0      | G |
| 28 | BICF2P367843            | 42153545 | 0 | 0    | 0      | G |
| 28 | BICF2P788414            | 42159448 | C | 0    | 0      | G |
| 28 | BICF2S2371952           | 42170970 | 0 | 0    | 0      | A |
| 28 | TIGRP2P362781_rs8531503 | 42191398 | G | 0.75 | 0.7857 | A |
| 28 | TIGRP2P362788_rs8731650 | 42195010 | C | 0    | 0      | A |
| 28 | BICF2P1161864           | 42211623 | G | 0    | 0      | A |
| 28 | TIGRP2P362850_rs8633219 | 42219077 | A | 0.25 | 0.2143 | C |
| 28 | BICF2P691768            | 42235397 | A | 0.75 | 0.7857 | G |
| 28 | BICF2S23445580          | 42239696 | A | 0    | 0      | C |
| 28 | BICF2P653589            | 42255234 | G | 0.75 | 0.7857 | A |
| 28 | BICF2P1392502           | 42256076 | G | 0    | 0      | A |
| 28 | BICF2P1392505           | 42256541 | A | 0    | 0      | T |
| 28 | BICF2S2348319           | 42258483 | G | 0    | 0      | A |
| 28 | TIGRP2P362903_rs8837293 | 42263679 | G | 0    | 0      | A |
| 28 | TIGRP2P362939_rs9035759 | 42274034 | C | 0    | 0      | A |
| 28 | BICF2P1214493           | 42291822 | C | 0    | 0      | G |
| 28 | BICF2S2354270           | 42304458 | A | 0    | 0      | C |
| 28 | BICF2S23744539          | 42312567 | G | 0    | 0      | A |
| 28 | TIGRP2P362998_rs9133117 | 42324552 | A | 0.75 | 0.7857 | G |
| 28 | TIGRP2P363001_rs8585359 | 42332543 | G | 0    | 0      | A |
| 28 | TIGRP2P363014_rs8932624 | 42348893 | A | 0    | 0      | G |
| 28 | BICF2P1094969           | 42354620 | A | 0    | 0      | G |
| 28 | BICF2P493711            | 42374779 | A | 0    | 0      | G |
| 28 | TIGRP2P363031_rs8846122 | 42381895 | A | 0    | 0      | G |
| 28 | TIGRP2P363038_rs8829374 | 42397357 | A | 0    | 0      | C |
| 28 | TIGRP2P363059_rs8996867 | 42406884 | G | 0    | 0      | A |
| 28 | BICF2S23056749          | 42413974 | C | 0    | 0      | A |
| 28 | BICF2P1153527           | 42426761 | A | 0.75 | 0.7857 | G |
| 28 | BICF2P1192639           | 42437874 | A | 0.25 | 0.1667 | G |
| 28 | BICF2S235622            | 42453696 | 0 | 0    | 0      | G |
| 28 | BICF2P243182            | 42460150 | A | 0    | 0      | C |

|    |                |          |   |      |        |   |
|----|----------------|----------|---|------|--------|---|
| 28 | BICF2S23760541 | 42480209 | A | 0    | 0      | G |
| 28 | BICF2S23638236 | 42486425 | 0 | 0    | 0      | G |
| 28 | BICF2P1032494  | 42499375 | G | 0    | 0      | A |
| 28 | BICF2P325865   | 42508953 | A | 0    | 0      | G |
| 28 | BICF2P965599   | 42518685 | A | 0    | 0      | G |
| 28 | BICF2P1082943  | 42531102 | A | 0    | 0      | G |
| 28 | BICF2P1075636  | 42540450 | G | 0.25 | 0.2143 | A |
| 28 | BICF2P886852   | 42553871 | A | 0    | 0      | G |
| 28 | BICF2P171455   | 42563135 | A | 0    | 0      | G |
| 28 | BICF2S23137833 | 42574905 | G | 0.75 | 0.7857 | A |
| 28 | BICF2P292009   | 42590456 | G | 0    | 0      | A |
| 28 | BICF2S23011657 | 42606122 | A | 0    | 0      | C |
| 28 | BICF2P1230775  | 42614335 | A | 0    | 0      | G |
| 28 | BICF2S2322395  | 42625465 | G | 0    | 0      | A |
| 28 | BICF2S2369514  | 42636858 | A | 0    | 0      | G |
| 28 | BICF2P697470   | 42647380 | A | 0.25 | 0.2143 | G |
| 28 | BICF2S23155768 | 42661388 | A | 0.5  | 0.5714 | G |
| 28 | BICF2S23430694 | 42665532 | A | 0    | 0      | C |
| 28 | BICF2S2346034  | 42680052 | A | 0.25 | 0.2143 | G |
| 28 | BICF2P733121   | 42691580 | G | 0    | 0      | A |
| 28 | BICF2P1471951  | 42709331 | A | 1    | 1      | G |
| 28 | BICF2S23139963 | 42718255 | A | 0    | 0      | C |
| 28 | BICF2P917395   | 42729157 | A | 0.25 | 0.2143 | G |
| 28 | BICF2P1099567  | 42743095 | 0 | 0    | 0      | G |
| 28 | BICF2S230836   | 42747083 | C | 0.75 | 0.7857 | A |
| 28 | BICF2P589343   | 42760877 | A | 0.25 | 0.1667 | C |
| 28 | BICF2S22921841 | 42774229 | A | 0.25 | 0.2143 | G |
| 28 | BICF2P1000801  | 42802918 | 0 | 0    | 0      | G |
| 28 | BICF2P234836   | 42811677 | G | 0.5  | 0.5714 | A |
| 28 | BICF2P204808   | 42815758 | G | 0.5  | 0.5714 | A |
| 28 | BICF2P461206   | 42824226 | G | 0.5  | 0.5714 | A |
| 28 | BICF2P1194919  | 42829055 | A | 0.5  | 0.5714 | G |
| 28 | BICF2P820347   | 42839907 | A | 0    | 0      | G |
| 28 | BICF2P207907   | 42862458 | A | 0    | 0      | G |
| 28 | BICF2S2294732  | 42876844 | C | 0.25 | 0.2143 | A |
| 28 | BICF2P1364123  | 42894999 | A | 0    | 0      | G |
| 28 | BICF2P343708   | 42907424 | G | 0.75 | 0.7857 | C |
| 28 | BICF2P224109   | 42922391 | 0 | 0    | 0      | C |
| 28 | BICF2S2369248  | 42936736 | G | 0.25 | 0.2143 | A |
| 28 | BICF2P794368   | 42943113 | A | 0    | 0      | G |
| 28 | BICF2S23538313 | 42960623 | G | 0    | 0      | A |
| 28 | BICF2S23110295 | 42986017 | G | 0    | 0      | A |
| 28 | BICF2P144412   | 42996411 | 0 | 0    | 0      | G |
| 28 | BICF2P255863   | 43005855 | G | 0    | 0      | A |
| 28 | BICF2P810994   | 43019120 | A | 0.5  | 0.5714 | G |
| 28 | BICF2S2313757  | 43021861 | 0 | 0    | 0      | G |
| 28 | BICF2P642687   | 43035397 | 0 | 0    | 0      | A |

|    |                 |          |   |   |   |   |
|----|-----------------|----------|---|---|---|---|
| 28 | BICF2S23013904  | 43046371 | G | 0 | 0 | A |
| 28 | BICF2P1279909   | 43064887 | A | 0 | 0 | G |
| 28 | BICF2P1264656   | 43067935 | A | 0 | 0 | G |
| 28 | BICF2P669276    | 43081699 | A | 0 | 0 | G |
| 28 | BICF2S23057372  | 43096726 | A | 0 | 0 | T |
| 28 | BICF2P884496    | 43102014 | 0 | 0 | 0 | G |
| 28 | BICF2S23041351  | 43117224 | A | 0 | 0 | G |
| 28 | BICF2P446230    | 43120126 | A | 0 | 0 | C |
| 28 | BICF2G630108699 | 43157083 | G | 0 | 0 | A |
| 28 | BICF2G630108702 | 43159892 | A | 0 | 0 | G |
| 28 | BICF2P1132814   | 43176040 | G | 0 | 0 | A |
| 28 | BICF2P897188    | 43185134 | A | 1 | 1 | G |
| 28 | BICF2G630108732 | 43195299 | A | 0 | 0 | G |
| 28 | BICF2P799359    | 43211875 | A | 0 | 0 | G |
| 28 | BICF2G630108751 | 43219665 | A | 0 | 0 | G |
| 28 | BICF2S23011652  | 43230332 | A | 0 | 0 | G |
| 28 | BICF2G630108765 | 43248444 | A | 0 | 0 | C |
| 28 | BICF2G630108773 | 43262147 | G | 1 | 1 | A |
| 28 | BICF2P1269257   | 43273167 | G | 0 | 0 | A |
| 28 | BICF2G630108798 | 43284702 | C | 0 | 0 | A |
| 28 | BICF2G630108823 | 43289353 | A | 1 | 1 | G |
| 28 | BICF2S2395766   | 43307534 | A | 0 | 0 | G |
| 28 | BICF2P319846    | 43315184 | 0 | 0 | 0 | G |
| 28 | BICF2P844260    | 43329762 | G | 0 | 0 | A |
| 28 | BICF2G630108844 | 43337963 | A | 1 | 1 | T |
| 28 | BICF2S23213193  | 43346172 | A | 0 | 0 | C |
| 28 | BICF2G630108870 | 43362169 | A | 0 | 0 | C |
| 28 | BICF2G630108882 | 43375189 | A | 0 | 0 | G |
| 28 | BICF2S23138686  | 43382674 | A | 1 | 1 | G |
| 28 | BICF2G630108915 | 43384022 | 0 | 0 | 0 | A |
| 28 | BICF2G630108925 | 43389803 | 0 | 0 | 0 | G |
| 28 | BICF2G630108954 | 43405420 | A | 0 | 0 | G |
| 28 | BICF2P1055792   | 43419218 | A | 0 | 0 | G |
| 28 | BICF2G630108989 | 43427456 | 0 | 0 | 0 | C |
| 28 | BICF2G630109007 | 43439164 | G | 0 | 0 | A |
| 28 | BICF2G630109015 | 43447557 | A | 1 | 1 | G |
| 28 | BICF2G630109026 | 43464107 | G | 0 | 0 | A |
| 28 | BICF2G630109037 | 43475176 | G | 0 | 0 | A |
| 28 | BICF2P355759    | 43487504 | G | 0 | 0 | A |
| 28 | BICF2G630109054 | 43496187 | A | 0 | 0 | C |
| 28 | BICF2P1247243   | 43506077 | 0 | 0 | 0 | G |
| 28 | BICF2G630109079 | 43517313 | A | 0 | 0 | G |
| 28 | BICF2S22918898  | 43540521 | A | 0 | 0 | G |
| 28 | BICF2G630109107 | 43554141 | A | 0 | 0 | T |
| 28 | BICF2G630109118 | 43570484 | A | 1 | 1 | G |
| 28 | BICF2G630109152 | 43581733 | A | 0 | 0 | G |
| 28 | BICF2G630109176 | 43589866 | A | 0 | 0 | G |

|    |                         |          |   |   |   |   |
|----|-------------------------|----------|---|---|---|---|
| 28 | BICF2G630109236         | 43605243 | A | 0 | 0 | G |
| 28 | BICF2S23746107          | 43608606 | A | 1 | 1 | G |
| 28 | BICF2G630109288         | 43630782 | G | 1 | 1 | A |
| 28 | BICF2G630109328         | 43638691 | A | 1 | 1 | G |
| 28 | BICF2G630109330         | 43638885 | A | 0 | 0 | G |
| 28 | BICF2G630109365         | 43650750 | A | 1 | 1 | G |
| 28 | BICF2G630109380         | 43661194 | A | 0 | 0 | G |
| 28 | BICF2G630109392         | 43674956 | G | 0 | 0 | A |
| 28 | BICF2G630109407         | 43680358 | C | 1 | 1 | A |
| 28 | BICF2G630109431         | 43690684 | A | 1 | 1 | G |
| 28 | BICF2P1025903           | 43708188 | G | 1 | 1 | A |
| 28 | BICF2G63064634          | 43722078 | G | 0 | 0 | A |
| 28 | BICF2G63064629          | 43723252 | A | 0 | 0 | C |
| 28 | BICF2G63064627          | 43745678 | A | 0 | 0 | G |
| 28 | BICF2G63064616          | 43746714 | A | 0 | 0 | C |
| 28 | BICF2G63064595          | 43763639 | G | 0 | 0 | A |
| 28 | BICF2G63064573          | 43769002 | A | 0 | 0 | G |
| 28 | BICF2G63064510          | 43792896 | G | 0 | 0 | A |
| 28 | BICF2P764276            | 43824316 | A | 1 | 1 | G |
| 28 | BICF2G63064495          | 43832273 | G | 0 | 0 | A |
| 28 | BICF2S23417373          | 43843427 | G | 1 | 1 | A |
| 28 | BICF2S23647581          | 43859769 | G | 0 | 0 | A |
| 28 | BICF2S23454269          | 43864907 | G | 0 | 0 | A |
| 28 | BICF2P672763            | 43896646 | G | 0 | 0 | A |
| 28 | BICF2P1175195           | 43907183 | G | 0 | 0 | A |
| 28 | BICF2P1293698           | 43919424 | A | 0 | 0 | G |
| 28 | BICF2P196556            | 43933520 | A | 0 | 0 | G |
| 28 | BICF2S2443300           | 43974648 | A | 0 | 0 | G |
| 28 | BICF2P625940            | 43976618 | A | 0 | 0 | G |
| 28 | BICF2S22935872          | 43993390 | G | 0 | 0 | A |
| 28 | BICF2P111596            | 44006433 | A | 0 | 0 | G |
| 28 | BICF2P936308            | 44011996 | G | 0 | 0 | A |
| 28 | BICF2S23158770          | 44031878 | G | 0 | 0 | A |
| 28 | BICF2P124519            | 44033718 | G | 0 | 0 | A |
| 28 | BICF2S23253219          | 44055434 | G | 1 | 1 | A |
| 28 | BICF2P609951            | 44068683 | 0 | 0 | 0 | C |
| 28 | BICF2P997456            | 44095477 | A | 1 | 1 | G |
| 28 | BICF2P1430226           | 44108470 | G | 1 | 1 | A |
| 28 | G1375f33S203            | 44132193 | 0 | 0 | 0 | C |
| 28 | BICF2P610014            | 44155612 | A | 1 | 1 | G |
| 28 | BICF2P1201455           | 44161646 | C | 0 | 0 | A |
| 28 | BICF2P1139789           | 44173932 | A | 0 | 0 | G |
| 28 | TIGRP2P278766_rs8517909 | 44185000 | 0 | 0 | 0 | G |
| 36 | BICF2P280574            | 3009126  | A | 0 | 0 | T |
| 36 | BICF2P463531            | 3017196  | A | 0 | 0 | G |
| 36 | BICF2P507105            | 3045246  | C | 0 | 0 | A |
| 36 | BICF2P1056718           | 3066525  | T | 0 | 0 | A |

|    |                         |         |   |      |        |   |
|----|-------------------------|---------|---|------|--------|---|
| 36 | TIGRP2P411343_rs8639454 | 3081043 | 0 | 0    | 0      | A |
| 36 | BICF2G630767244         | 3082947 | G | 0    | 0      | C |
| 36 | TIGRP2P411400_rs8904032 | 3116630 | G | 0    | 0      | A |
| 36 | BICF2P1268585           | 3133362 | A | 0    | 0      | G |
| 36 | BICF2P1374082           | 3143866 | 0 | 0    | 0      | G |
| 36 | BICF2S2354925           | 3158896 | G | 0    | 0      | A |
| 36 | BICF2P1271365           | 3166220 | A | 0.5  | 0.2857 | G |
| 36 | BICF2P672586            | 3190919 | 0 | 0    | 0      | C |
| 36 | TIGRP2P411407_rs8827839 | 3202236 | G | 0.5  | 0.2857 | A |
| 36 | BICF2G630767237         | 3227455 | A | 0    | 0      | G |
| 36 | BICF2S23512611          | 3242873 | G | 0.5  | 0.2857 | A |
| 36 | BICF2P355181            | 3252213 | G | 0.5  | 0.2857 | A |
| 36 | BICF2P1191930           | 3260911 | G | 0.5  | 0.2857 | A |
| 36 | TIGRP2P411435_rs8976479 | 3290884 | A | 0.5  | 0.125  | G |
| 36 | BICF2P1320447           | 3308437 | A | 0.5  | 0.25   | G |
| 36 | BICF2P1176061           | 3334038 | 0 | 0    | 0      | A |
| 36 | BICF2S23133290          | 3337920 | 0 | 0    | 0      | G |
| 36 | BICF2P490510            | 3347101 | G | 0.5  | 0.2857 | A |
| 36 | TIGRP2P411464_rs9149163 | 3380685 | 0 | 0    | 0      | G |
| 36 | BICF2P681712            | 3406754 | 0 | 0    | 0      | A |
| 36 | BICF2P1030491           | 3452285 | C | 0    | 0      | A |
| 36 | TIGRP2P411467_rs8743617 | 3479273 | 0 | 0    | 0      | A |
| 36 | BICF2G630767224         | 3492257 | G | 0.5  | 0.7143 | A |
| 36 | BICF2G630767219         | 3496825 | A | 0    | 0      | G |
| 36 | BICF2G630767200         | 3510825 | G | 0    | 0      | A |
| 36 | BICF2G630767188         | 3522571 | A | 0.5  | 0.7143 | C |
| 36 | BICF2G630767170         | 3534432 | G | 0.5  | 0.7143 | A |
| 36 | BICF2P1009394           | 3543814 | C | 0.5  | 0.7143 | A |
| 36 | BICF2G630767145         | 3559314 | C | 0.25 | 0.4286 | A |
| 36 | BICF2P348342            | 3566577 | G | 0.25 | 0.4286 | A |
| 36 | BICF2P240645            | 3584155 | A | 0    | 0      | G |
| 36 | BICF2P314649            | 3588597 | A | 0    | 0      | G |
| 36 | TIGRP2P411496_rs9033631 | 3605278 | A | 0    | 0      | G |
| 36 | BICF2S23618097          | 3613128 | G | 0.75 | 0.7143 | A |
| 36 | TIGRP2P411511_rs9157861 | 3636755 | 0 | 0    | 0      | A |
| 36 | BICF2S23655554          | 3669178 | A | 0.5  | 0.2857 | G |
| 36 | BICF2G630767082         | 3704216 | A | 0.5  | 0.2857 | G |
| 36 | BICF2G630767062         | 3720818 | A | 0.75 | 0.7143 | G |
| 36 | BICF2G630767058         | 3736441 | A | 0.5  | 0.2857 | G |
| 36 | BICF2G630767044         | 3751834 | G | 0.5  | 0.2857 | A |
| 36 | BICF2G630767024         | 3770273 | G | 0.5  | 0.2857 | A |
| 36 | BICF2G630767015         | 3776060 | A | 0.5  | 0.2857 | G |
| 36 | BICF2G630766993         | 3792747 | A | 0.5  | 0.25   | G |
| 36 | BICF2G630766979         | 3806679 | A | 0.5  | 0.2857 | G |
| 36 | BICF2G630766966         | 3824013 | G | 0.5  | 0.2857 | A |
| 36 | BICF2G630766944         | 3838861 | A | 0.5  | 0.25   | G |
| 36 | BICF2G630766927         | 3854728 | 0 | 0    | 0      | G |

|    |                         |         |   |      |        |   |
|----|-------------------------|---------|---|------|--------|---|
| 36 | BICF2P927990            | 3898124 | A | 0    | 0      | G |
| 36 | BICF2S24112931          | 3900823 | C | 0.5  | 0.2857 | A |
| 36 | BICF2G630766924         | 3924800 | G | 0.75 | 0.7143 | A |
| 36 | BICF2G630766904         | 3935681 | G | 0.25 | 0.4286 | A |
| 36 | BICF2G630766870         | 3946062 | G | 0    | 0      | A |
| 36 | BICF2G630766859         | 3954536 | G | 0.75 | 0.7143 | A |
| 36 | BICF2G630766852         | 3962121 | G | 0.75 | 0.7143 | A |
| 36 | BICF2G630766849         | 3971830 | A | 0    | 0      | C |
| 36 | BICF2G630766834         | 3979122 | 0 | 0    | 0      | C |
| 36 | BICF2G630766817         | 3991465 | 0 | 0    | 0      | G |
| 36 | BICF2P564171            | 3995509 | G | 0.25 | 0.4286 | A |
| 36 | BICF2G630766781         | 4014524 | 0 | 0    | 0      | G |
| 36 | BICF2G630766779         | 4032710 | 0 | 0    | 0      | C |
| 36 | BICF2P837329            | 4041320 | 0 | 0    | 0      | A |
| 36 | BICF2G630766777         | 4062816 | 0 | 0    | 0      | G |
| 36 | BICF2P1088754           | 4081894 | C | 0.5  | 0.2    | A |
| 36 | BICF2G630766771         | 4083100 | C | 0    | 0      | A |
| 36 | TIGRP2P411554_rs9102166 | 4095921 | A | 0    | 0      | T |
| 36 | BICF2G630766763         | 4112189 | A | 0    | 0      | G |
| 36 | BICF2G630766761         | 4117449 | A | 0    | 0      | G |
| 36 | TIGRP2P411557_rs9027841 | 4138522 | A | 0    | 0      | G |
| 36 | BICF2G630766750         | 4141472 | G | 0    | 0      | A |
| 36 | BICF2G630766737         | 4172950 | A | 0.5  | 0.2857 | T |
| 36 | BICF2S23636845          | 4179096 | A | 0    | 0      | G |
| 36 | BICF2G630766701         | 4193455 | C | 0.5  | 0.2857 | A |
| 36 | BICF2G630766699         | 4194096 | A | 0.5  | 0.2857 | G |
| 36 | BICF2G630766691         | 4197552 | C | 0.75 | 0.7143 | A |
| 36 | BICF2G630766661         | 4208362 | G | 1    | 0.7143 | A |
| 36 | BICF2G630766651         | 4216354 | A | 0.5  | 0.2857 | C |
| 36 | BICF2G630766642         | 4222329 | G | 0.5  | 0.2857 | A |
| 36 | BICF2S2361684           | 4265555 | G | 0    | 0      | C |
| 36 | BICF2S22962940          | 4271894 | C | 0    | 0      | A |
| 36 | BICF2P825083            | 4280862 | 0 | 0    | 0      | A |
| 36 | BICF2G630766635         | 4292393 | C | 0    | 0.2857 | A |
| 36 | BICF2G630766629         | 4311104 | 0 | 0    | 0      | G |
| 36 | BICF2G630766624         | 4323300 | 0 | 0    | 0      | A |
| 36 | BICF2G630766618         | 4334144 | 0 | 0    | 0      | A |
| 36 | BICF2G630766611         | 4337678 | 0 | 0    | 0      | G |
| 36 | BICF2P210206            | 4349563 | A | 0    | 0      | C |
| 36 | BICF2G630766596         | 4361782 | A | 0.5  | 0.7143 | G |
| 36 | BICF2G630766593         | 4371648 | A | 0.5  | 0.2857 | C |
| 36 | BICF2G630766585         | 4390156 | A | 0.5  | 0.2857 | G |
| 36 | BICF2G630766581         | 4393752 | G | 0.5  | 0.2857 | A |
| 36 | BICF2G630766572         | 4406659 | A | 0.5  | 0.2857 | G |
| 36 | BICF2G630766561         | 4422478 | G | 0    | 0      | A |
| 36 | BICF2G630766553         | 4427929 | G | 0    | 0      | A |
| 36 | BICF2S23351983          | 4439492 | 0 | 0    | 0      | A |

|    |                         |         |   |      |        |   |
|----|-------------------------|---------|---|------|--------|---|
| 36 | BICF2G630766520         | 4456441 | A | 1    | 0.7143 | G |
| 36 | BICF2P361542            | 4462311 | G | 0    | 0      | A |
| 36 | BICF2G630766511         | 4483301 | A | 0.5  | 0.2857 | C |
| 36 | BICF2G630766508         | 4486009 | A | 0.5  | 0.2857 | G |
| 36 | BICF2G630766501         | 4506725 | A | 0.5  | 0.2857 | C |
| 36 | BICF2G630766497         | 4508038 | G | 0.5  | 0.2857 | A |
| 36 | BICF2G630766481         | 4520303 | A | 0.5  | 0.2857 | G |
| 36 | BICF2P1433853           | 4552104 | G | 0.25 | 0.2857 | A |
| 36 | BICF2G630766466         | 4558360 | G | 0.25 | 0.2857 | A |
| 36 | BICF2S23243006          | 4568264 | A | 0.5  | 0.2857 | G |
| 36 | TIGRP2P411626_rs8804272 | 4579197 | 0 | 0    | 0      | G |
| 36 | BICF2G630766458         | 4610809 | A | 0.25 | 0.4286 | G |
| 36 | TIGRP2P411629_rs8622818 | 4613128 | A | 0    | 0      | G |
| 36 | BICF2G630766438         | 4627131 | A | 0    | 0      | G |
| 36 | BICF2G630766429         | 4643626 | G | 0    | 0      | A |
| 36 | BICF2P974507            | 4646185 | A | 0.25 | 0.2857 | G |
| 36 | BICF2G630766425         | 4651384 | G | 0.25 | 0.2857 | A |
| 36 | BICF2G630766416         | 4661517 | A | 0    | 0      | G |
| 36 | BICF2G630766410         | 4672124 | G | 1    | 1      | A |
| 36 | BICF2G630766407         | 4687203 | A | 0    | 0      | G |
| 36 | BICF2G630766400         | 4694345 | G | 0    | 0      | A |
| 36 | BICF2G630766378         | 4709352 | A | 1    | 1      | G |
| 36 | BICF2P753080            | 4715105 | 0 | 0    | 0      | A |
| 36 | BICF2P469885            | 4744134 | 0 | 0    | 0      | A |
| 36 | BICF2P646173            | 4763370 | 0 | 0    | 0      | A |
| 36 | BICF2P62684             | 4780834 | 0 | 0    | 0      | A |
| 36 | BICF2P1461610           | 4785925 | C | 0    | 0      | A |
| 36 | TIGRP2P411663_rs8971790 | 4819476 | 0 | 0    | 0      | C |
| 36 | TIGRP2P411667_rs9078604 | 4832241 | A | 0    | 0      | G |
| 36 | BICF2G630766349         | 4851099 | A | 0    | 0      | G |
| 36 | BICF2P575741            | 4856206 | G | 0    | 0      | A |
| 36 | TIGRP2P411674_rs9083218 | 4871412 | G | 0    | 0      | A |
| 36 | BICF2P1421914           | 4886998 | A | 0    | 0      | G |
| 36 | BICF2P1371215           | 4888183 | A | 0    | 0      | G |
| 36 | BICF2P156915            | 4899002 | 0 | 0    | 0      | G |
| 36 | BICF2P868169            | 4912953 | 0 | 0    | 0      | C |
| 36 | BICF2P636433            | 4922709 | 0 | 0    | 0      | C |
| 36 | BICF2G630766347         | 4944844 | 0 | 0    | 0      | G |
| 36 | BICF2P546957            | 4945855 | 0 | 0    | 0      | A |
| 36 | BICF2G630766346         | 4972342 | A | 0    | 0      | G |
| 36 | BICF2G630766343         | 5001703 | 0 | 0    | 0      | G |
| 36 | BICF2G630766342         | 5009320 | 0 | 0    | 0      | C |
| 36 | BICF2G630766333         | 5014665 | 0 | 0    | 0      | G |
| 36 | BICF2G630766314         | 5031771 | 0 | 0    | 0      | G |
| 36 | BICF2G630766312         | 5038511 | 0 | 0    | 0      | A |
| 36 | BICF2G630766298         | 5048680 | A | 0.25 | 0.5    | G |
| 36 | BICF2G630766283         | 5062651 | 0 | 0    | 0      | T |



|    |                         |         |   |      |        |   |
|----|-------------------------|---------|---|------|--------|---|
| 36 | TIGRP2P416156_rs8666162 | 5138252 | C | 0.5  | 0.8    | G |
| 36 | TIGRP2P416162_rs8711127 | 5145590 | A | 0.25 | 0.5    | G |
| 36 | TIGRP2P416169_rs8756339 | 5192174 | 0 | 0    | 0      | A |
| 36 | BICF2P1058928           | 5200873 | 0 | 0    | 0      | A |
| 36 | BICF2P972855            | 5219776 | G | 0    | 0      | A |
| 36 | TIGRP2P416183_rs8560628 | 5222025 | A | 0    | 0      | T |
| 36 | TIGRP2P416187_rs9061960 | 5248677 | 0 | 0    | 0      | G |
| 36 | BICF2G630766274         | 5262837 | G | 0.75 | 0.7857 | A |
| 36 | BICF2P318883            | 5292404 | 0 | 0    | 0      | G |
| 36 | BICF2P1047939           | 5307771 | A | 0    | 0      | G |
| 36 | BICF2P1012444           | 5316182 | 0 | 0    | 0      | G |
| 36 | BICF2P477220            | 5335141 | 0 | 0    | 0      | A |
| 36 | TIGRP2P416203_rs8737818 | 5342247 | 0 | 0    | 0      | G |
| 36 | BICF2P1418375           | 5357339 | A | 0.25 | 0.2143 | C |
| 36 | BICF2P294333            | 5360359 | G | 0.75 | 0.7857 | A |
| 36 | BICF2S23147324          | 5378996 | 0 | 0    | 0      | G |
| 36 | BICF2P520007            | 5386685 | G | 0.5  | 0.7143 | A |
| 36 | TIGRP2P416215_rs9211052 | 5393700 | A | 0.5  | 0.2857 | G |
| 36 | BICF2P1197125           | 5408001 | C | 0    | 0      | G |
| 36 | BICF2P487255            | 5425757 | A | 0.75 | 0.7857 | G |
| 36 | BICF2G630766268         | 5432662 | C | 0    | 0      | A |
| 36 | BICF2P822422            | 5442684 | A | 1    | 0.7857 | G |
| 36 | BICF2G630766247         | 5452698 | C | 0.25 | 0.5    | A |
| 36 | BICF2G630766234         | 5476785 | G | 0.5  | 0.2857 | A |
| 36 | BICF2G630766213         | 5489959 | G | 0.25 | 0.5    | A |
| 36 | BICF2G630766208         | 5501569 | G | 0    | 0      | A |
| 36 | BICF2S23158162          | 5518898 | C | 0.25 | 0.5    | A |
| 36 | BICF2G630766191         | 5523034 | G | 0.25 | 0.5    | A |
| 36 | BICF2P816717            | 5547820 | 0 | 0    | 0      | A |
| 36 | BICF2P614547            | 5559843 | A | 0.75 | 0.5    | G |
| 36 | BICF2G630766166         | 5567839 | A | 0    | 0      | G |
| 36 | BICF2G630766162         | 5581407 | G | 0.75 | 0.7857 | A |
| 36 | BICF2S23042790          | 5593990 | G | 0    | 0      | A |
| 36 | BICF2G630766124         | 5608504 | T | 0.75 | 0.7857 | A |
| 36 | BICF2P307865            | 5632609 | C | 0    | 0      | A |
| 36 | BICF2P580444            | 5636626 | 0 | 0    | 0      | A |
| 36 | BICF2G630766122         | 5650466 | A | 0    | 0      | C |
| 36 | BICF2P407433            | 5659662 | A | 0    | 0      | G |
| 36 | BICF2G630766119         | 5678585 | A | 1    | 1      | G |
| 36 | BICF2G630766103         | 5694082 | A | 1    | 1      | G |
| 36 | BICF2G630766090         | 5707984 | A | 1    | 1      | G |
| 36 | BICF2G630766071         | 5716084 | G | 1    | 1      | A |
| 36 | TIGRP2P416253_rs8663424 | 5736121 | 0 | 0    | 0      | C |
| 36 | BICF2G630766060         | 5743117 | A | 1    | 1      | G |
| 36 | BICF2S23637751          | 5765557 | G | 0.25 | 0.2143 | A |
| 36 | BICF2G630766053         | 5783734 | G | 0    | 0      | A |
| 36 | BICF2P231476            | 5788577 | A | 0.75 | 0.7857 | G |

|    |                         |         |   |      |        |   |
|----|-------------------------|---------|---|------|--------|---|
| 36 | TIGRP2P416258_rs9233119 | 5799501 | A | 0.5  | 0.2857 | G |
| 36 | BICF2P890125            | 5808288 | G | 0    | 0      | A |
| 36 | BICF2P936234            | 5822951 | A | 0.75 | 0.7857 | G |
| 36 | BICF2G630766005         | 5838759 | A | 0    | 0.2143 | G |
| 36 | BICF2G630765995         | 5842372 | G | 0.25 | 0.2143 | A |
| 36 | BICF2G630765975         | 5864061 | A | 0    | 0      | G |
| 36 | BICF2G630765971         | 5872184 | C | 0    | 0      | A |
| 36 | BICF2G630765965         | 5877105 | G | 0    | 0      | A |
| 36 | BICF2G630765955         | 5888469 | A | 0    | 0      | G |
| 36 | BICF2P1080532           | 5905408 | T | 0    | 0      | A |
| 36 | BICF2G630765934         | 5914349 | C | 0.75 | 0.7857 | A |
| 36 | BICF2G630765919         | 5924031 | C | 0    | 0      | A |
| 36 | BICF2G630765889         | 5937102 | G | 0    | 0      | A |
| 36 | BICF2G630765873         | 5947507 | A | 0    | 0      | G |
| 36 | BICF2P1424506           | 5959447 | 0 | 0    | 0      | A |
| 36 | BICF2P1365420           | 5969929 | 0 | 0    | 0      | A |
| 36 | BICF2G630765863         | 5984538 | A | 0    | 0.2143 | G |
| 36 | BICF2G630765822         | 5993162 | A | 0    | 0.4286 | G |
| 36 | BICF2G630765801         | 6024032 | A | 0    | 0      | G |
| 36 | BICF2S23110448          | 6029074 | A | 0.5  | 0.75   | C |
| 36 | BICF2P1216317           | 6037893 | G | 0    | 0      | A |
| 36 | TIGRP2P416333_rs8931728 | 6050730 | G | 1    | 0.7857 | A |
| 36 | BICF2G630765734         | 6071463 | T | 0.25 | 0.4286 | A |
| 36 | BICF2G630765728         | 6078126 | G | 0    | 0      | A |
| 36 | BICF2P251137            | 6087019 | G | 0    | 0.2143 | A |
| 36 | TIGRP2P416341_rs8898951 | 6099405 | G | 0.75 | 0.5714 | A |
| 36 | BICF2P758184            | 6107236 | C | 1    | 0.7857 | A |
| 36 | BICF2P1170520           | 6118007 | G | 1    | 0.7857 | A |
| 36 | BICF2P431314            | 6130958 | A | 0    | 0      | G |
| 36 | BICF2P1178308           | 6148569 | A | 0.25 | 0.2143 | G |
| 36 | TIGRP2P416350_rs8909311 | 6157858 | G | 0    | 0      | A |
| 36 | BICF2P1194373           | 6165082 | A | 0    | 0      | G |
| 36 | BICF2P539419            | 6181909 | 0 | 0    | 0      | G |
| 36 | TIGRP2P416362_rs9079913 | 6191275 | 0 | 0    | 0      | C |
| 36 | BICF2P976043            | 6205685 | 0 | 0    | 0      | T |
| 36 | BICF2P605828            | 6215575 | 0 | 0    | 0      | A |
| 36 | BICF2G630765715         | 6231993 | A | 0.25 | 0.4286 | G |
| 36 | BICF2G630765703         | 6235007 | G | 0.25 | 0.4286 | A |
| 36 | BICF2G630765690         | 6244803 | G | 0    | 0.2143 | A |
| 36 | BICF2G630765677         | 6259318 | T | 0    | 0.2143 | A |
| 36 | G1474f19S150            | 6283588 | A | 0.25 | 0.2143 | G |
| 36 | BICF2P982409            | 6302225 | 0 | 0    | 0      | G |
| 36 | TIGRP2P416366_rs8583812 | 6320753 | A | 0.25 | 0.2143 | C |
| 36 | TIGRP2P416375_rs8621264 | 6333278 | A | 0    | 0      | G |
| 36 | BICF2G630765674         | 6346502 | A | 0    | 0      | G |
| 36 | BICF2P975292            | 6347407 | A | 0.75 | 0.5714 | G |
| 36 | BICF2G630765667         | 6351018 | C | 0    | 0      | A |

|    |                         |         |   |      |        |   |
|----|-------------------------|---------|---|------|--------|---|
| 36 | BICF2P1029044           | 6359557 | A | 0    | 0      | G |
| 36 | BICF2P67465             | 6362974 | G | 0    | 0      | A |
| 36 | BICF2G630765652         | 6380904 | A | 0.25 | 0.2143 | G |
| 36 | BICF2G630765649         | 6382917 | G | 0.25 | 0.2143 | A |
| 36 | BICF2G630765615         | 6401232 | A | 0    | 0      | C |
| 36 | BICF2P536983            | 6409670 | 0 | 0    | 0      | A |
| 36 | BICF2G630765607         | 6417560 | G | 0    | 0      | A |
| 36 | BICF2P17739             | 6419785 | A | 0    | 0      | C |
| 36 | BICF2G630765601         | 6422994 | A | 0    | 0.2143 | G |
| 36 | BICF2G630765586         | 6434812 | A | 0    | 0.2143 | G |
| 36 | BICF2G630765575         | 6447047 | G | 0    | 0      | A |
| 36 | BICF2P1112040           | 6458775 | G | 0.25 | 0.4286 | A |
| 36 | BICF2G630765573         | 6468685 | 0 | 0    | 0      | G |
| 36 | BICF2P1472660           | 6479494 | 0 | 0    | 0      | A |
| 36 | BICF2P279942            | 6493198 | A | 0    | 0      | G |
| 36 | TIGRP2P416412_rs8999185 | 6502911 | G | 0    | 0      | A |
| 36 | BICF2P1353575           | 6523193 | 0 | 0    | 0      | A |
| 36 | BICF2P121973            | 6542913 | A | 0    | 0      | C |
| 36 | BICF2S23650898          | 6550005 | 0 | 0    | 0      | G |
| 36 | BICF2P1003943           | 6559744 | A | 0    | 0.2143 | G |
| 36 | BICF2P728698            | 6568975 | A | 0.25 | 0.4286 | G |
| 36 | BICF2P692226            | 6581690 | A | 0.75 | 0.5714 | C |
| 36 | BICF2P1463964           | 6599623 | G | 0.75 | 0.5833 | A |
| 36 | BICF2G630765569         | 6611456 | A | 0.25 | 0.2143 | G |
| 36 | BICF2G630765566         | 6612538 | 0 | 0    | 0      | G |
| 36 | BICF2G630765553         | 6629326 | A | 0    | 0      | G |
| 36 | TIGRP2P416432_rs8913262 | 6656656 | G | 0.25 | 0.2143 | A |
| 36 | BICF2P1086980           | 6672215 | A | 0.25 | 0.2143 | G |
| 36 | BICF2S2396915           | 6719341 | A | 0    | 0      | G |
| 36 | BICF2S24510397          | 6753670 | G | 0    | 0      | A |
| 36 | BICF2S23747617          | 6767307 | A | 0    | 0      | C |
| 36 | BICF2P1017971           | 6775073 | 0 | 0    | 0      | G |
| 36 | BICF2P449090            | 6795635 | 0 | 0    | 0      | A |
| 36 | BICF2G630765542         | 6820894 | A | 0    | 0      | G |
| 36 | BICF2P1260643           | 6833790 | 0 | 0    | 0      | G |
| 36 | BICF2P852957            | 6857963 | A | 0    | 0      | G |
| 36 | BICF2G630765534         | 6866389 | A | 0.25 | 0.2143 | G |
| 36 | BICF2G630765514         | 6879295 | A | 0.75 | 0.7857 | G |
| 36 | BICF2G630765492         | 6897700 | G | 0.25 | 0.2143 | A |
| 36 | BICF2G630765486         | 6899667 | G | 0.25 | 0.2143 | C |
| 36 | BICF2G630765480         | 6901502 | G | 0.75 | 0.7857 | A |
| 36 | BICF2S23915337          | 6918902 | 0 | 0    | 0      | A |
| 36 | BICF2P854797            | 6926948 | 0 | 0    | 0      | A |
| 36 | BICF2S23761947          | 6936387 | A | 0.75 | 0.7857 | G |
| 36 | BICF2P96217             | 6947803 | A | 0    | 0      | G |
| 36 | BICF2S23513493          | 6967942 | G | 0    | 0      | A |
| 36 | TIGRP2P416476_rs8620774 | 6979875 | A | 0    | 0      | G |

|    |                         |         |   |      |        |   |
|----|-------------------------|---------|---|------|--------|---|
| 36 | BICF2P1283695           | 6981668 | G | 0    | 0      | A |
| 36 | TIGRP2P416478_rs8875890 | 6995844 | G | 1    | 1      | A |
| 36 | BICF2G630765477         | 7020102 | A | 1    | 1      | G |
| 36 | TIGRP2P416483_rs8759388 | 7028579 | A | 0.75 | 0.7857 | G |
| 36 | TIGRP2P416505_rs8623043 | 7047029 | 0 | 0    | 0      | A |
| 36 | BICF2G630765464         | 7055679 | A | 0    | 0      | G |
| 36 | TIGRP2P416526_rs8584625 | 7067096 | A | 0    | 0      | G |
| 36 | BICF2G630765459         | 7080995 | A | 1    | 0.7857 | G |
| 36 | BICF2P142446            | 7093804 | 0 | 0    | 0      | T |
| 36 | BICF2G630765455         | 7101065 | A | 0.75 | 0.7857 | G |
| 36 | BICF2S23316979          | 7115725 | A | 0.75 | 0.7857 | G |
| 36 | BICF2P765360            | 7129038 | 0 | 0    | 0      | G |
| 36 | BICF2G630765443         | 7134636 | A | 0.75 | 0.7857 | G |
| 36 | BICF2G630765420         | 7144181 | C | 0.75 | 0.7857 | A |
| 36 | BICF2G630765386         | 7162005 | G | 0.75 | 0.7857 | A |
| 36 | BICF2G630765377         | 7167872 | G | 0    | 0      | A |
| 36 | BICF2S23539095          | 7181864 | A | 0    | 0      | G |
| 36 | BICF2G630765359         | 7188254 | G | 0    | 0      | A |
| 36 | BICF2G630765349         | 7210948 | A | 0    | 0      | G |
| 36 | BICF2G630765338         | 7226836 | C | 0    | 0      | G |
| 36 | BICF2G630765328         | 7241342 | G | 0.75 | 0.7857 | A |
| 36 | BICF2G630765317         | 7248618 | G | 0.75 | 0.7857 | A |
| 36 | BICF2G630765307         | 7265062 | 0 | 0    | 0      | G |
| 36 | BICF2G630765305         | 7269291 | G | 0.75 | 0.7857 | A |
| 36 | BICF2G630765295         | 7283925 | A | 0.75 | 0.7857 | G |
| 36 | BICF2G630765285         | 7300297 | G | 0.75 | 0.7857 | A |
| 36 | BICF2G630765283         | 7309867 | C | 0.25 | 0.2143 | A |
| 36 | BICF2G630765276         | 7321654 | G | 0    | 0      | A |
| 36 | BICF2P716396            | 7341379 | A | 0    | 0      | G |
| 36 | BICF2P873462            | 7351206 | A | 0    | 0      | G |
| 36 | BICF2G630765241         | 7361181 | A | 0    | 0      | G |
| 36 | BICF2G630765218         | 7375780 | G | 0    | 0      | A |
| 36 | BICF2S23210354          | 7392155 | A | 0.25 | 0.2143 | C |
| 36 | BICF2G630765182         | 7394781 | C | 0.25 | 0.2143 | A |
| 36 | BICF2G630765163         | 7409967 | A | 0    | 0      | G |
| 36 | BICF2G630765141         | 7428977 | G | 0.25 | 0.2143 | A |
| 36 | BICF2G630765138         | 7431917 | A | 0    | 0      | G |
| 36 | BICF2G630765115         | 7444416 | A | 0.25 | 0.2143 | G |
| 36 | BICF2G630765102         | 7454637 | A | 0.25 | 0.2143 | C |
| 36 | BICF2G630765090         | 7466952 | A | 0.25 | 0.2143 | G |
| 36 | BICF2G630765088         | 7471073 | A | 0.25 | 0.2143 | C |
| 36 | BICF2S23747008          | 7471649 | A | 0    | 0      | G |
| 36 | BICF2P505361            | 7489605 | A | 0.25 | 0.2143 | G |
| 36 | BICF2P677198            | 7500933 | G | 0.25 | 0.2143 | A |
| 36 | BICF2G630765063         | 7509636 | G | 0.25 | 0.2143 | A |
| 36 | BICF2S2372348           | 7522249 | A | 0    | 0      | G |
| 36 | BICF2G630765039         | 7533591 | A | 0    | 0      | G |

|    |                         |         |   |      |        |   |
|----|-------------------------|---------|---|------|--------|---|
| 36 | BICF2G630765022         | 7545012 | A | 0.25 | 0.2143 | C |
| 36 | BICF2G630765009         | 7558586 | A | 0    | 0      | G |
| 36 | BICF2G630764995         | 7568174 | G | 0    | 0      | A |
| 36 | BICF2P369024            | 7581247 | A | 0.25 | 0.2143 | C |
| 36 | BICF2P571291            | 7599250 | 0 | 0    | 0      | A |
| 36 | BICF2S23156996          | 7617379 | A | 0.25 | 0.2143 | C |
| 36 | BICF2S2339471           | 7626773 | G | 1    | 1      | A |
| 36 | BICF2P582187            | 7637712 | 0 | 0    | 0      | G |
| 36 | BICF2P219355            | 7661460 | A | 1    | 1      | T |
| 36 | BICF2S2295455           | 7672819 | G | 0    | 0      | A |
| 36 | TIGRP2P416636_rs8858510 | 7691463 | 0 | 0    | 0      | A |
| 36 | TIGRP2P416638_rs9137769 | 7701241 | A | 0    | 0      | G |
| 36 | TIGRP2P416641_rs8865686 | 7710739 | A | 0    | 0      | C |
| 36 | BICF2P31254             | 7717521 | A | 0    | 0      | G |
| 36 | BICF2G630764960         | 7744874 | G | 0    | 0      | A |
| 36 | BICF2G630764933         | 7755977 | G | 0    | 0      | A |
| 36 | BICF2G630764919         | 7763519 | A | 0    | 0      | G |
| 36 | BICF2P447792            | 7771866 | C | 0    | 0      | G |
| 36 | BICF2G630764900         | 7782494 | G | 0    | 0      | A |
| 36 | BICF2P312209            | 7803800 | G | 0    | 0      | A |
| 36 | BICF2G630764879         | 7818734 | G | 0    | 0      | A |
| 36 | BICF2G630764874         | 7822295 | G | 0    | 0      | A |
| 36 | TIGRP2P416683_rs9018503 | 7832409 | G | 0    | 0      | A |
| 36 | BICF2P62926             | 7849659 | A | 0    | 0      | G |
| 36 | BICF2P1055677           | 7855923 | A | 0    | 0      | T |
| 36 | BICF2G630764868         | 7869588 | A | 0    | 0      | G |
| 36 | BICF2G630764858         | 7878723 | A | 1    | 1      | C |
| 36 | BICF2G630764848         | 7889404 | A | 0    | 0      | G |
| 36 | BICF2G630764846         | 7908406 | G | 0    | 0      | A |
| 36 | BICF2G630764818         | 7917147 | A | 0    | 0      | G |
| 36 | TIGRP2P416701_rs8663192 | 7927703 | A | 1    | 1      | G |
| 36 | BICF2S22955709          | 7936173 | A | 0    | 0      | G |
| 36 | BICF2G630764784         | 7946921 | A | 0    | 0      | T |
| 36 | BICF2S23352004          | 7947388 | A | 1    | 1      | G |
| 36 | BICF2G630764767         | 7953342 | C | 0    | 0      | G |
| 36 | BICF2G630764747         | 7968675 | G | 0    | 0      | A |
| 36 | BICF2P1342977           | 7989580 | 0 | 0    | 0      | C |
| 36 | TIGRP2P416707_rs8672228 | 7998683 | A | 0    | 0      | G |
| 36 | BICF2P437140            | 8014908 | G | 0    | 0      | A |
| 36 | BICF2G630764738         | 8025339 | A | 0    | 0      | G |
| 36 | BICF2G630764734         | 8027765 | A | 0    | 0      | G |
| 36 | BICF2G630764712         | 8047635 | C | 0    | 0      | A |
| 36 | BICF2G630764710         | 8054014 | A | 0    | 0      | G |
| 36 | BICF2G630764695         | 8070375 | A | 0    | 0      | G |
| 36 | BICF2P62669             | 8091643 | G | 1    | 1      | A |
| 36 | BICF2P453259            | 8103791 | 0 | 0    | 0      | A |
| 36 | TIGRP2P416723_rs9195052 | 8119192 | A | 1    | 1      | G |

|    |                         |         |   |      |        |   |
|----|-------------------------|---------|---|------|--------|---|
| 36 | TIGRP2P416727_rs8724543 | 8135174 | A | 0    | 0      | C |
| 36 | BICF2G630764689         | 8144741 | A | 0    | 0      | G |
| 36 | BICF2P614531            | 8165226 | A | 0    | 0      | G |
| 36 | BICF2P277834            | 8181805 | G | 1    | 1      | A |
| 36 | BICF2P127372            | 8202206 | A | 1    | 1      | G |
| 36 | TIGRP2P416734_rs8597570 | 8212888 | G | 1    | 1      | A |
| 36 | TIGRP2P416737_rs9195120 | 8227712 | A | 1    | 1      | G |
| 36 | BICF2P1091742           | 8253975 | 0 | 0    | 0      | C |
| 36 | BICF2P492533            | 8257074 | C | 1    | 1      | G |
| 36 | BICF2S23248530          | 8276692 | T | 0    | 0      | A |
| 36 | BICF2P529314            | 8307328 | G | 1    | 1      | C |
| 36 | TIGRP2P416753_rs8709289 | 8315994 | A | 1    | 1      | G |
| 36 | BICF2P835171            | 8342949 | A | 1    | 1      | G |
| 36 | BICF2P250399            | 8371866 | A | 1    | 1      | G |
| 36 | TIGRP2P416761_rs8856898 | 8374449 | A | 1    | 1      | C |
| 36 | BICF2P1169963           | 8391040 | A | 0.75 | 0.7857 | G |
| 36 | BICF2G630764682         | 8420469 | G | 0    | 0      | A |
| 36 | BICF2G630764674         | 8455144 | C | 0    | 0      | G |
| 36 | BICF2P375753            | 8464912 | C | 0.75 | 0.7857 | A |
| 36 | BICF2G630764663         | 8486063 | G | 0    | 0      | A |
| 36 | BICF2S23011837          | 8501277 | G | 0    | 0      | C |
| 36 | BICF2P758960            | 8519874 | G | 0    | 0      | A |
| 36 | TIGRP2P369635_rs8651736 | 8528500 | 0 | 0    | 0      | A |
| 36 | BICF2G630764625         | 8533702 | G | 0    | 0      | A |
| 36 | BICF2G630764612         | 8547361 | A | 0    | 0      | G |
| 36 | BICF2G630764599         | 8559916 | G | 0    | 0      | A |
| 36 | TIGRP2P416792_rs8921291 | 8564818 | 0 | 0    | 0      | G |
| 36 | BICF2G630764590         | 8571559 | A | 0    | 0      | G |
| 36 | BICF2G630764583         | 8579153 | G | 0.25 | 0.2143 | A |
| 36 | BICF2G630764563         | 8592035 | A | 0    | 0      | G |
| 36 | BICF2G630764547         | 8603332 | G | 0    | 0      | A |
| 36 | BICF2G630764520         | 8629378 | A | 0    | 0      | G |
| 36 | TIGRP2P416824_rs9188708 | 8639025 | 0 | 0    | 0      | A |
| 36 | BICF2G630764488         | 8650594 | A | 0.75 | 0.7857 | G |
| 36 | BICF2G630764460         | 8669151 | G | 0.75 | 0.7857 | A |
| 36 | BICF2G630764457         | 8669815 | A | 0    | 0      | C |
| 36 | BICF2G630764450         | 8673226 | A | 0.75 | 0.7857 | C |
| 36 | BICF2P1310299           | 8685409 | C | 0.25 | 0.2143 | A |
| 36 | BICF2S23764783          | 8691059 | C | 0.25 | 0.2143 | G |
| 36 | BICF2G630764414         | 8694385 | A | 0.25 | 0.2143 | C |
| 36 | BICF2G630764389         | 8712400 | G | 0.25 | 0.2143 | A |
| 36 | BICF2G630764375         | 8720931 | G | 0    | 0      | A |
| 36 | BICF2P547531            | 8732934 | A | 0.25 | 0.2143 | G |
| 36 | BICF2G630764360         | 8741036 | G | 0.25 | 0.2143 | A |
| 36 | BICF2G630764350         | 8762877 | G | 0.75 | 0.7857 | A |
| 36 | BICF2P436573            | 8772185 | G | 0    | 0      | A |
| 36 | TIGRP2P416865_rs8571651 | 8799560 | G | 0.25 | 0.2143 | A |

|    |                         |         |   |      |        |   |
|----|-------------------------|---------|---|------|--------|---|
| 36 | BICF2P1015146           | 8813491 | C | 0.75 | 0.7857 | A |
| 36 | BICF2P631999            | 8825764 | A | 0.25 | 0.2143 | G |
| 36 | BICF2G630764314         | 8833830 | A | 0.25 | 0.2143 | G |
| 36 | BICF2G630764305         | 8843835 | A | 0.25 | 0.2143 | G |
| 36 | BICF2P717192            | 8858431 | A | 0    | 0.2143 | G |
| 36 | BICF2P892198            | 8873591 | A | 0    | 0      | T |
| 36 | BICF2S23061222          | 8874982 | C | 0    | 0      | G |
| 36 | BICF2G630764285         | 8882742 | 0 | 0    | 0      | G |
| 36 | BICF2G630764278         | 8890165 | A | 0    | 0      | G |
| 36 | TIGRP2P416901_rs8851183 | 8908426 | A | 0.25 | 0.2143 | C |
| 36 | BICF2G630764264         | 8912613 | A | 0    | 0      | G |
| 36 | BICF2P231146            | 8926965 | A | 0.25 | 0.2143 | C |
| 36 | BICF2G630764250         | 8933528 | T | 0.75 | 0.7857 | A |
| 36 | TIGRP2P416913_rs8810913 | 8936160 | G | 0.75 | 0.7857 | A |
| 36 | BICF2G630764219         | 8951130 | A | 1    | 1      | G |
| 36 | BICF2G630764215         | 8959055 | C | 0    | 0      | A |
| 36 | TIGRP2P416918_rs8781827 | 8974708 | G | 0.75 | 0.7857 | A |
| 36 | BICF2P780338            | 8986204 | A | 0    | 0      | G |
| 36 | BICF2P553194            | 8993715 | C | 0    | 0      | A |
| 36 | BICF2P599048            | 9015096 | A | 0    | 0      | G |
| 36 | BICF2S2307003           | 9029939 | A | 0    | 0      | C |
| 36 | BICF2S23325196          | 9035158 | G | 0    | 0      | A |
| 36 | TIGRP2P416932_rs9099566 | 9042154 | 0 | 0    | 0      | G |
| 36 | BICF2P509905            | 9054207 | A | 0    | 0      | G |
| 36 | TIGRP2P416934_rs8554754 | 9063765 | G | 0.75 | 0.7857 | A |
| 36 | BICF2P1359390           | 9079761 | A | 0.75 | 0.7857 | G |
| 36 | BICF2G630764203         | 9094802 | A | 0.75 | 0.7857 | G |
| 36 | BICF2S23161113          | 9098553 | G | 0    | 0.2143 | A |
| 36 | BICF2P149610            | 9109359 | A | 0    | 0      | G |
| 36 | BICF2P848810            | 9115913 | C | 0.25 | 0.2143 | A |
| 36 | TIGRP2P416944_rs8943839 | 9129309 | 0 | 0    | 0      | G |
| 36 | BICF2P337399            | 9132250 | C | 0    | 0      | A |
| 36 | BICF2P453026            | 9149498 | A | 0    | 0      | G |
| 36 | BICF2P1268478           | 9163930 | G | 0.75 | 0.7857 | A |
| 36 | BICF2P340192            | 9167738 | A | 0.75 | 0.7857 | G |
| 36 | BICF2P794648            | 9182329 | A | 0.75 | 0.7857 | G |
| 36 | BICF2P709101            | 9191687 | G | 0.75 | 0.7857 | A |
| 36 | BICF2S23216212          | 9198316 | G | 1    | 1      | A |
| 36 | BICF2P426258            | 9205172 | G | 0    | 0      | A |
| 36 | BICF2P156856            | 9219404 | G | 0.25 | 0.2143 | A |
| 36 | TIGRP2P416991_rs9197617 | 9252074 | A | 0.25 | 0.1667 | G |
| 36 | BICF2P450093            | 9278598 | G | 1    | 1      | A |
| 36 | TIGRP2P416999_rs8842016 | 9281158 | 0 | 0    | 0      | A |
| 36 | TIGRP2P417008_rs9069692 | 9301615 | A | 0    | 0      | G |
| 36 | BICF2P540675            | 9307517 | A | 0.75 | 0.7857 | G |
| 36 | BICF2P552982            | 9318087 | G | 0.75 | 0.7857 | A |
| 36 | TIGRP2P417020_rs8709299 | 9334300 | C | 0.25 | 0.2143 | A |

|    |                         |         |   |      |        |   |
|----|-------------------------|---------|---|------|--------|---|
| 36 | BICF2P180489            | 9355105 | A | 0.25 | 0.2143 | G |
| 36 | BICF2P431712            | 9365540 | G | 1    | 1      | A |
| 36 | TIGRP2P417024_rs8607451 | 9373334 | 0 | 0    | 0      | A |
| 36 | TIGRP2P417025_rs8920998 | 9393761 | A | 0    | 0      | G |
| 36 | BICF2S23145656          | 9398670 | A | 0    | 0      | G |
| 36 | TIGRP2P417029_rs9245639 | 9409493 | A | 0.25 | 0.2143 | G |
| 36 | BICF2S23913611          | 9424637 | A | 0    | 0      | G |
| 36 | TIGRP2P417034_rs8785693 | 9431842 | A | 0.25 | 0.2143 | G |
| 36 | BICF2S23451209          | 9444169 | G | 0.25 | 0.2143 | A |
| 36 | BICF2P618237            | 9455420 | 0 | 0    | 0      | A |
| 36 | BICF2S23428861          | 9476872 | G | 0    | 0      | A |
| 36 | BICF2S23447288          | 9496217 | G | 0.25 | 0.2143 | A |
| 36 | BICF2S22920284          | 9505318 | A | 0    | 0      | G |
| 36 | TIGRP2P417055_rs9038125 | 9513730 | G | 0    | 0      | A |
| 36 | TIGRP2P417063_rs8875588 | 9527936 | G | 0    | 0      | A |
| 36 | BICF2P1049609           | 9550395 | A | 0    | 0      | G |
| 36 | BICF2S2291656           | 9558928 | G | 0.25 | 0.2143 | A |
| 36 | BICF2P463821            | 9574839 | A | 0    | 0      | G |
| 36 | BICF2P1184631           | 9582619 | G | 0    | 0      | A |
| 36 | TIGRP2P417070_rs8543009 | 9594469 | A | 0    | 0      | G |
| 36 | BICF2P1191989           | 9619558 | G | 0.75 | 0.7857 | A |
| 36 | BICF2P99003             | 9634397 | A | 0.25 | 0.2143 | G |
| 36 | BICF2P1210875           | 9638431 | A | 0.25 | 0.2143 | C |
| 36 | TIGRP2P417091_rs8524517 | 9648883 | A | 0    | 0      | G |
| 36 | BICF2P314511            | 9663633 | 0 | 0    | 0      | G |
| 36 | BICF2P566547            | 9682130 | A | 0.75 | 0.7857 | C |
| 36 | BICF2P280305            | 9705868 | G | 0    | 0      | C |
| 36 | BICF2P747464            | 9707736 | A | 0    | 0      | G |
| 36 | TIGRP2P417101_rs9154055 | 9717869 | A | 0    | 0      | G |
| 36 | BICF2G630764168         | 9729908 | A | 0    | 0      | G |
| 36 | BICF2G630764145         | 9749562 | G | 1    | 1      | C |
| 36 | BICF2G630764141         | 9761921 | A | 0    | 0      | G |
| 36 | BICF2G630764137         | 9765095 | A | 0    | 0      | C |
| 36 | BICF2G630764134         | 9776893 | C | 0    | 0      | A |
| 36 | BICF2G630764121         | 9792476 | A | 0    | 0      | G |
| 36 | BICF2G630764112         | 9805899 | A | 0    | 0      | G |
| 36 | BICF2G630764105         | 9812994 | A | 0    | 0      | G |
| 36 | BICF2G630764095         | 9824392 | G | 0    | 0      | A |
| 36 | BICF2P826493            | 9843218 | 0 | 0    | 0      | A |
| 36 | TIGRP2P417112_rs9008053 | 9854278 | A | 0.75 | 0.7857 | G |
| 36 | BICF2P102152            | 9860440 | 0 | 0    | 0      | A |
| 36 | BICF2P309312            | 9867836 | A | 0    | 0      | G |
| 36 | TIGRP2P417116_rs8914862 | 9885260 | 0 | 0    | 0      | A |
| 36 | BICF2P62179             | 9894305 | 0 | 0    | 0      | A |
| 36 | BICF2G630764081         | 9906524 | 0 | 0    | 0      | A |
| 36 | BICF2G630764076         | 9924405 | G | 0    | 0      | A |
| 36 | BICF2G630764066         | 9960747 | G | 0    | 0      | A |



|    |                         |          |   |      |        |   |
|----|-------------------------|----------|---|------|--------|---|
| 36 | BICF2P1064882           | 9971876  | G | 0    | 0      | A |
| 36 | BICF2G630764065         | 9984185  | A | 0    | 0      | G |
| 36 | BICF2G630764062         | 9997952  | G | 0    | 0      | A |
| 36 | BICF2P857904            | 10008597 | G | 0    | 0      | A |
| 36 | BICF2P315740            | 10023761 | A | 0.25 | 0.2143 | G |
| 36 | BICF2P444883            | 10033126 | A | 0.25 | 0.2143 | C |
| 36 | BICF2P636820            | 10050265 | A | 0.25 | 0.2143 | G |
| 36 | BICF2P340096            | 10051611 | A | 0.25 | 0.2143 | G |
| 36 | BICF2G630764060         | 10074857 | G | 0    | 0      | A |
| 36 | BICF2P712488            | 10076763 | G | 0.25 | 0.2143 | C |
| 36 | BICF2G630764055         | 10092918 | A | 0.25 | 0.1667 | G |
| 36 | BICF2G630764046         | 10101592 | G | 0    | 0      | A |
| 36 | BICF2G630764035         | 10114000 | G | 0.25 | 0.2143 | C |
| 36 | BICF2G630764029         | 10119810 | G | 0    | 0      | A |
| 36 | BICF2G630764026         | 10129512 | A | 0    | 0      | C |
| 36 | BICF2G630764019         | 10132993 | G | 0    | 0      | A |
| 36 | BICF2G630764012         | 10146412 | G | 0    | 0      | A |
| 36 | BICF2G630764007         | 10154956 | A | 0.75 | 0.7857 | G |
| 36 | BICF2G630764002         | 10166606 | G | 0    | 0      | A |
| 36 | BICF2P916667            | 10180462 | C | 0    | 0      | A |
| 36 | BICF2G630763990         | 10197396 | G | 0    | 0      | A |
| 36 | BICF2G630763980         | 10210735 | A | 0    | 0      | C |
| 36 | BICF2G630763977         | 10217584 | C | 0    | 0      | A |
| 36 | BICF2P840778            | 10226892 | C | 1    | 1      | A |
| 36 | BICF2P718830            | 10245748 | A | 0    | 0      | G |
| 36 | TIGRP2P411712_rs8887248 | 10250108 | A | 1    | 1      | G |
| 36 | BICF2G630763951         | 10267160 | A | 0    | 0      | G |
| 36 | BICF2P427834            | 10285684 | A | 1    | 1      | G |
| 36 | BICF2P812810            | 10295367 | G | 0    | 0      | A |
| 36 | BICF2P1157822           | 10312846 | G | 0.25 | 0.2143 | A |
| 36 | BICF2P460503            | 10320324 | A | 0    | 0      | G |
| 36 | BICF2P447390            | 10335145 | A | 0.75 | 0.7857 | G |
| 36 | BICF2S23060459          | 10339418 | G | 1    | 1      | A |
| 36 | BICF2P167281            | 10360009 | C | 0    | 0      | A |
| 36 | BICF2S23313866          | 10362456 | A | 0    | 0      | G |
| 36 | BICF2P1242852           | 10375208 | G | 0    | 0      | A |
| 36 | TIGRP2P411765_rs9141332 | 10388276 | A | 0.25 | 0.2143 | C |
| 36 | BICF2P270450            | 10388516 | G | 0.25 | 0.1667 | A |
| 36 | TIGRP2P411769_rs9219630 | 10402600 | C | 0    | 0      | A |
| 36 | BICF2P688335            | 10408883 | A | 1    | 1      | G |
| 36 | BICF2G630763939         | 10425601 | A | 0    | 0      | G |
| 36 | BICF2G630763929         | 10436938 | C | 0    | 0      | G |
| 36 | BICF2S23326717          | 10437158 | C | 0    | 0      | A |
| 36 | BICF2P95574             | 10445650 | A | 0    | 0      | G |
| 36 | BICF2P429231            | 10454009 | A | 1    | 1      | C |
| 36 | BICF2G630763926         | 10466505 | 0 | 0    | 0      | C |
| 36 | BICF2P913441            | 10476819 | C | 0    | 0      | A |

|    |                         |          |   |    |   |   |
|----|-------------------------|----------|---|----|---|---|
| 36 | BICF2G630763924         | 10491501 | A | 1  | 1 | C |
| 36 | TIGRP2P411791_rs9153344 | 10515269 | C | 0  | 0 | A |
| 36 | BICF2S23323638          | 10522529 | A | 0  | 0 | G |
| 36 | BICF2G630763907         | 10537201 | A | 1  | 1 | G |
| 36 | BICF2G630763902         | 10562909 | A | NA | 1 | G |
| 36 | BICF2G630763892         | 10575749 | A | 0  | 0 | T |
| 36 | BICF2S23034767          | 10591334 | T | 0  | 0 | A |
| 36 | BICF2G630763866         | 10600518 | G | 0  | 0 | A |
| 36 | BICF2G630763849         | 10606952 | G | 0  | 0 | A |
| 36 | BICF2P818155            | 10615000 | G | 0  | 0 | A |
| 36 | BICF2G630763794         | 10628818 | A | 0  | 0 | G |
| 36 | BICF2P443952            | 10637601 | A | 1  | 1 | G |
| 36 | BICF2G630763772         | 10653684 | 0 | 0  | 0 | G |
| 36 | BICF2G630763762         | 10663403 | A | 1  | 1 | G |
| 36 | BICF2P1165820           | 10673600 | G | 0  | 0 | A |
| 36 | BICF2P105578            | 10694632 | 0 | 0  | 0 | A |
| 36 | BICF2G630763744         | 10702996 | A | 0  | 0 | G |
| 36 | BICF2P1379442           | 10715050 | G | 0  | 0 | A |
| 36 | BICF2P1349638           | 10719915 | G | 0  | 0 | A |
| 36 | BICF2G630763730         | 10729711 | G | 0  | 0 | A |
| 36 | BICF2G630763706         | 10747642 | A | 1  | 1 | C |
| 36 | BICF2P640695            | 10757106 | C | 0  | 0 | A |
| 36 | BICF2G630763695         | 10767086 | C | 0  | 0 | A |
| 36 | BICF2G630763692         | 10769788 | G | 1  | 1 | A |
| 36 | BICF2G630763679         | 10776233 | G | 1  | 1 | A |
| 36 | BICF2P1375321           | 10791677 | C | 0  | 0 | G |
| 36 | BICF2G630763671         | 10800402 | A | 1  | 1 | G |
| 36 | TIGRP2P411858_rs8499231 | 10819160 | A | 0  | 0 | G |
| 36 | BICF2P1457637           | 10823527 | G | 1  | 1 | A |
| 36 | TIGRP2P411869_rs8824784 | 10834662 | A | 0  | 0 | G |
| 36 | BICF2P1175620           | 10845634 | G | 0  | 0 | A |
| 36 | TIGRP2P411885_rs8492316 | 10856215 | A | 0  | 0 | C |
| 36 | BICF2G630763648         | 10876470 | 0 | 0  | 0 | G |
| 36 | BICF2G630763641         | 10902851 | C | 0  | 0 | A |
| 36 | BICF2P234913            | 10918019 | A | 0  | 0 | G |
| 36 | BICF2G630763618         | 10932872 | A | 0  | 0 | C |
| 36 | BICF2G630763610         | 10942276 | C | 0  | 0 | A |
| 36 | BICF2G630763607         | 10954570 | G | 0  | 0 | A |
| 36 | BICF2G630763601         | 10963443 | G | 1  | 1 | C |
| 36 | BICF2G630763592         | 10972668 | G | 0  | 0 | A |
| 36 | BICF2P583309            | 11007677 | G | 0  | 0 | A |
| 36 | BICF2G630763579         | 11022612 | A | 0  | 0 | G |
| 36 | BICF2G630763577         | 11048641 | A | 0  | 0 | G |
| 36 | BICF2G630763572         | 11051679 | A | 1  | 1 | G |
| 36 | BICF2P1019461           | 11063177 | A | 0  | 0 | G |
| 36 | BICF2G630763555         | 11064255 | A | 0  | 0 | G |
| 36 | BICF2G630763532         | 11076119 | G | 0  | 0 | A |

|    |                         |          |   |      |        |   |
|----|-------------------------|----------|---|------|--------|---|
| 36 | BICF2P327264            | 11095255 | T | 0    | 0      | A |
| 36 | BICF2G630763508         | 11102588 | G | 0    | 0      | A |
| 36 | BICF2G630763497         | 11128930 | G | 0    | 0      | A |
| 36 | BICF2P1445124           | 11143557 | A | 0    | 0      | G |
| 36 | BICF2G630763454         | 11163198 | G | 0    | 0      | A |
| 36 | BICF2S22911008          | 11168389 | A | 1    | 1      | C |
| 36 | BICF2P239223            | 11182025 | 0 | 0    | 0      | G |
| 36 | BICF2G630763445         | 11192157 | A | 0    | 0      | C |
| 36 | BICF2P516613            | 11207532 | 0 | 0    | 0      | A |
| 36 | BICF2S2352845           | 11215199 | G | 0    | 0      | A |
| 36 | BICF2G630763431         | 11224787 | C | 0    | 0      | A |
| 36 | BICF2S23117475          | 11243120 | A | 0    | 0      | G |
| 36 | BICF2G630763404         | 11253062 | A | 0    | 0      | G |
| 36 | BICF2G630763402         | 11262682 | G | 0    | 0      | A |
| 36 | BICF2P620315            | 11286067 | A | 0    | 0      | G |
| 36 | BICF2P1314712           | 11294426 | A | 0    | 0      | C |
| 36 | BICF2P133270            | 11307029 | G | 0    | 0      | A |
| 36 | BICF2P622668            | 11346460 | 0 | 0    | 0      | A |
| 36 | G1476f23S298            | 11367759 | A | 0    | 0      | T |
| 36 | BICF2P734563            | 11395573 | G | 0    | 0      | A |
| 36 | BICF2P1259301           | 11396909 | A | 0    | 0      | G |
| 36 | TIGRP2P412014_rs9142961 | 11411551 | A | 0    | 0      | G |
| 36 | BICF2G630763373         | 11463090 | G | 0    | 0      | A |
| 36 | BICF2G630763367         | 11472611 | A | 0    | 0      | G |
| 36 | TIGRP2P412034_rs9194205 | 11474607 | A | 1    | 1      | G |
| 36 | BICF2P406309            | 11492641 | G | 0    | 0      | A |
| 36 | BICF2G630763326         | 11501040 | G | 0    | 0      | A |
| 36 | BICF2P441416            | 11518058 | A | 0    | 0      | G |
| 36 | TIGRP2P412051_rs9147437 | 11527416 | G | 0    | 0      | A |
| 36 | BICF2G630763310         | 11542288 | C | 1    | 1      | A |
| 36 | BICF2S2363467           | 11551590 | T | 0    | 0      | A |
| 36 | BICF2G630763294         | 11561012 | G | 0    | 0      | A |
| 36 | BICF2G630763280         | 11575242 | G | 1    | 1      | A |
| 36 | BICF2G630763276         | 11581096 | G | 0    | 0      | A |
| 36 | BICF2G630763247         | 11594858 | A | 0    | 0      | G |
| 36 | BICF2G630763216         | 11607507 | A | 0    | 0      | G |
| 36 | BICF2G630763204         | 11616659 | C | 0.25 | 0.2143 | A |
| 36 | BICF2G630763190         | 11631354 | G | 0    | 0      | A |
| 36 | BICF2S23534370          | 11643324 | 0 | 0    | 0      | A |
| 36 | BICF2G630763176         | 11653989 | A | 0.75 | 0.7857 | G |
| 36 | BICF2G630763164         | 11661734 | G | 0    | 0      | C |
| 36 | BICF2G630763159         | 11680655 | A | 0    | 0      | G |
| 36 | BICF2G630763158         | 11686309 | A | 1    | 1      | G |
| 36 | BICF2G630763156         | 11700476 | G | 0.75 | 0.7857 | A |
| 36 | BICF2P1178319           | 11700907 | G | 0    | 0      | A |
| 36 | TIGRP2P412079_rs8688726 | 11716675 | G | 0    | 0      | A |
| 36 | BICF2G630763140         | 11728109 | A | 0.25 | 0.2143 | G |

|    |                         |          |   |      |        |   |
|----|-------------------------|----------|---|------|--------|---|
| 36 | BICF2G630763133         | 11732376 | A | 1    | 1      | G |
| 36 | BICF2G630763112         | 11744882 | A | 1    | 1      | G |
| 36 | BICF2G630763099         | 11754652 | A | 0    | 0      | G |
| 36 | BICF2S23718652          | 11766776 | A | 1    | 1      | G |
| 36 | BICF2P947447            | 11782912 | 0 | 0    | 0      | A |
| 36 | BICF2G630763078         | 11788971 | A | 0    | 0      | C |
| 36 | BICF2P762934            | 11807855 | G | 0    | 0      | A |
| 36 | BICF2P589984            | 11811797 | A | 0.25 | 0.2143 | G |
| 36 | TIGRP2P412094_rs9127467 | 11826418 | A | 0    | 0      | G |
| 36 | BICF2G630763076         | 11838250 | A | 0    | 0      | G |
| 36 | BICF2G630763059         | 11855033 | A | 0    | 0      | G |
| 36 | BICF2G630763052         | 11874192 | G | 0    | 0      | A |
| 36 | BICF2P1039626           | 11879572 | G | 0    | 0      | A |
| 36 | BICF2G630763049         | 11911362 | G | 0    | 0      | A |
| 36 | BICF2G630763045         | 11917517 | A | 0    | 0      | G |
| 36 | BICF2G630763025         | 11938800 | G | 0.25 | 0.2143 | A |
| 36 | BICF2P623692            | 11951704 | A | 0    | 0      | G |
| 36 | BICF2S2317255           | 11969765 | G | 0.75 | 0.7857 | A |
| 36 | BICF2G630763012         | 11972451 | G | 0.75 | 0.7857 | A |
| 36 | BICF2P363560            | 11992816 | A | 0    | 0      | C |
| 36 | BICF2G630763004         | 11998373 | A | 0    | 0      | G |
| 36 | BICF2P1392906           | 12010663 | A | 0    | 0      | C |
| 36 | BICF2S22916867          | 12016357 | A | 0.75 | 0.7857 | G |
| 36 | BICF2G630762989         | 12017625 | A | 1    | 1      | G |
| 36 | TIGRP2P412130_rs8878351 | 12030645 | G | 1    | 1      | A |
| 36 | BICF2G630762963         | 12041983 | C | 0.75 | 0.7857 | A |
| 36 | BICF2G630762960         | 12044312 | G | 0.75 | 0.7857 | C |
| 36 | BICF2G630762951         | 12062951 | G | 0.25 | 0.2143 | A |
| 36 | BICF2G630762949         | 12063578 | A | 1    | 1      | G |
| 36 | BICF2G630762930         | 12084033 | C | 1    | 1      | A |
| 36 | BICF2G630762925         | 12091127 | G | 1    | 1      | A |
| 36 | BICF2P1169958           | 12101396 | A | 0    | 0      | G |
| 36 | BICF2G630762908         | 12104162 | G | 0    | 0      | A |
| 36 | BICF2P860086            | 12117023 | G | 0    | 0      | C |
| 36 | TIGRP2P412144_rs9186637 | 12121740 | A | 0    | 0      | G |
| 36 | BICF2G630762868         | 12136156 | G | 0.75 | 0.7857 | A |
| 36 | BICF2P1106735           | 12144033 | G | 0    | 0      | A |
| 36 | TIGRP2P412156_rs9243349 | 12157705 | A | 0    | 0      | G |
| 36 | BICF2P545363            | 12171029 | G | 0.25 | 0.2143 | A |
| 36 | BICF2P545365            | 12171602 | A | 0.25 | 0.2143 | C |
| 36 | BICF2P766128            | 12180756 | A | 0.25 | 0.2143 | G |
| 36 | BICF2G630762815         | 12201198 | A | 0    | 0      | G |
| 36 | BICF2G630762801         | 12208506 | A | 1    | 1      | G |
| 36 | BICF2P734788            | 12220298 | A | 0    | 0      | C |
| 36 | BICF2G630762796         | 12226844 | G | 0    | 0      | A |
| 36 | BICF2P267530            | 12236226 | G | 0    | 0      | A |
| 36 | BICF2P1234195           | 12248859 | G | 0.25 | 0.2143 | A |

|    |                         |          |   |      |        |   |
|----|-------------------------|----------|---|------|--------|---|
| 36 | TIGRP2P412181_rs8663380 | 12269036 | A | 1    | 1      | G |
| 36 | BICF2G630762748         | 12280423 | G | 0    | 0      | A |
| 36 | BICF2P655629            | 12285610 | A | 1    | 1      | G |
| 36 | TIGRP2P412192_rs8927561 | 12292542 | A | 0    | 0      | G |
| 36 | BICF2G630762727         | 12295297 | G | 1    | 1      | A |
| 36 | TIGRP2P412201_rs8655481 | 12309609 | G | 0.75 | 0.7857 | A |
| 36 | BICF2G630762689         | 12317618 | A | 0.75 | 0.7857 | G |
| 36 | TIGRP2P412204_rs8638329 | 12328293 | G | 0.75 | 0.7857 | A |
| 36 | BICF2G630762675         | 12341104 | C | 0    | 0      | A |
| 36 | BICF2P218579            | 12359109 | G | 0    | 0      | A |
| 36 | BICF2P526371            | 12363058 | A | 1    | 1      | G |
| 36 | BICF2P476538            | 12374415 | A | 1    | 1      | G |
| 36 | BICF2P1081501           | 12386212 | A | 0    | 0      | G |
| 36 | BICF2P1424186           | 12406317 | 0 | 0    | 0      | C |
| 36 | BICF2G630762640         | 12406338 | A | 0.25 | 0.2143 | G |
| 36 | BICF2G630762631         | 12410894 | C | 0    | 0      | A |
| 36 | BICF2P1065373           | 12414470 | A | 0.25 | 0.2143 | G |
| 36 | BICF2G630762605         | 12431282 | 0 | 0    | 0      | G |
| 36 | BICF2G630762591         | 12440410 | A | 0    | 0      | G |
| 36 | BICF2P858630            | 12441071 | A | 0    | 0      | T |
| 36 | BICF2G630762590         | 12441165 | G | 0    | 0      | A |
| 36 | BICF2G630762586         | 12443150 | A | 0    | 0      | G |
| 36 | BICF2S23411869          | 12456639 | G | 0    | 0      | A |
| 36 | BICF2G630762574         | 12466286 | A | 0    | 0      | T |
| 36 | BICF2G630762573         | 12466329 | G | 0    | 0      | A |
| 36 | BICF2G630762570         | 12478917 | G | 0    | 0      | A |
| 36 | BICF2P677235            | 12502872 | A | 0.25 | 0.2143 | G |
| 36 | BICF2G630762557         | 12516566 | A | 0.25 | 0.2143 | G |
| 36 | BICF2G630762525         | 12553049 | 0 | 0    | 0      | G |
| 36 | BICF2P1307154           | 12574591 | A | 1    | 1      | G |
| 36 | BICF2G630762505         | 12589619 | A | 0.75 | 0.5714 | C |
| 36 | BICF2G630762504         | 12589759 | A | 0.75 | 0.5714 | G |
| 36 | BICF2P1082566           | 12595277 | A | 0    | 0      | G |
| 36 | BICF2S23050250          | 12605095 | G | 0    | 0      | A |
| 36 | BICF2P883776            | 12616646 | G | 0.25 | 0.2143 | A |
| 36 | BICF2G630762498         | 12631907 | A | 1    | 0.7857 | G |
| 36 | BICF2G630762484         | 12648095 | A | 0    | 0.2143 | G |
| 36 | BICF2G630762466         | 12655934 | A | 0    | 0.2143 | C |
| 36 | BICF2G630762459         | 12662909 | A | 0.25 | 0.2143 | C |
| 36 | BICF2G630762457         | 12680455 | 0 | 0    | 0      | G |
| 36 | BICF2P938883            | 12689777 | G | 1    | 0.7857 | A |
| 36 | BICF2S23116016          | 12698318 | 0 | 0    | 0      | G |
| 36 | BICF2G630762448         | 12709977 | T | 0    | 0      | A |
| 36 | BICF2G630762447         | 12711262 | 0 | 0    | 0      | G |
| 36 | BICF2G630762440         | 12719180 | G | 1    | 1      | A |
| 36 | BICF2G630762431         | 12730769 | G | 1    | 1      | A |
| 36 | BICF2S2374059           | 12751941 | 0 | 0    | 0      | A |

|    |                 |          |   |      |        |   |
|----|-----------------|----------|---|------|--------|---|
| 36 | BICF2G630762414 | 12757837 | G | 1    | 1      | A |
| 36 | BICF2G630762384 | 12773622 | A | 1    | 1      | C |
| 36 | BICF2P1105820   | 12777331 | 0 | 0    | 0      | A |
| 36 | BICF2P1107702   | 12797346 | 0 | 0    | 0      | A |
| 36 | BICF2S232647    | 12820822 | A | 1    | 0.7857 | G |
| 36 | BICF2P397119    | 12826080 | 0 | 0    | 0      | C |
| 36 | BICF2P237627    | 12859764 | 0 | 0    | 0      | A |
| 36 | BICF2P1381819   | 12874287 | A | 0    | 0      | C |
| 36 | BICF2P172883    | 12889158 | G | 1    | 0.7857 | A |
| 36 | BICF2P230826    | 12903072 | 0 | 0    | 0      | G |
| 36 | BICF2P285445    | 12920601 | G | 0    | 0      | A |
| 36 | BICF2P624960    | 12927442 | G | 1    | 1      | A |
| 36 | BICF2P811520    | 12941397 | A | 0    | 0      | G |
| 36 | BICF2P948602    | 12957898 | A | 0    | 0      | T |
| 36 | BICF2P948616    | 12960619 | A | 1    | 1      | G |
| 36 | BICF2P923456    | 12979557 | A | 0    | 0      | G |
| 36 | BICF2S23244986  | 12984007 | C | 0    | 0      | A |
| 36 | BICF2P580689    | 12995801 | A | 0    | 0      | G |
| 36 | BICF2S22915016  | 13008596 | A | 0    | 0      | G |
| 36 | BICF2S23634231  | 13012626 | A | 1    | 1      | T |
| 36 | BICF2S23651299  | 13031464 | A | 1    | 1      | C |
| 36 | BICF2S23512878  | 13043557 | A | 0    | 0      | G |
| 36 | BICF2S23339755  | 13053353 | G | 0    | 0      | A |
| 36 | BICF2S2361777   | 13081904 | A | 0    | 0      | T |
| 36 | BICF2P129670    | 13094751 | G | 1    | 0.7857 | A |
| 36 | BICF2P349922    | 13100817 | C | 1    | 1      | A |
| 36 | BICF2P506322    | 13116903 | 0 | 0    | 0      | A |
| 36 | BICF2P1390601   | 13129169 | A | 0    | 0      | G |
| 36 | BICF2P1028051   | 13140011 | A | 1    | 0.7857 | G |
| 36 | BICF2P1119225   | 13154520 | C | 0    | 0      | A |
| 36 | BICF2P244666    | 13159998 | 0 | 0    | 0      | C |
| 36 | BICF2P1139474   | 13168761 | 0 | 0    | 0      | C |
| 36 | BICF2S23343226  | 13186695 | C | 0    | 0      | G |
| 36 | BICF2P843030    | 13210180 | 0 | 0    | 0      | A |
| 36 | BICF2P511588    | 13214954 | C | 0.75 | 0.7143 | A |
| 36 | BICF2S23625218  | 13232932 | 0 | 0    | 0      | A |
| 36 | BICF2P694281    | 13238132 | G | 0.75 | 0.7143 | A |
| 36 | BICF2P1317997   | 13257502 | G | 0.25 | 0.2857 | A |
| 36 | BICF2P224481    | 13288385 | A | 0.25 | 0.2857 | G |
| 36 | BICF2S23718169  | 13321799 | G | 0    | 0      | A |
| 36 | BICF2P636659    | 13338330 | A | 0    | 0.2143 | G |
| 36 | BICF2P434913    | 13343627 | A | 0    | 0.1667 | G |
| 36 | BICF2S23735563  | 13353215 | A | 0    | 0      | G |
| 36 | BICF2P1081255   | 13374253 | 0 | 0    | 0      | A |
| 36 | BICF2S23644676  | 13379339 | A | 0    | 0      | G |
| 36 | BICF2P1105622   | 13387693 | 0 | 0    | 0      | G |
| 36 | BICF2S23722787  | 13400272 | C | 0    | 0      | A |

|    |                         |          |   |      |        |   |
|----|-------------------------|----------|---|------|--------|---|
| 36 | BICF2P804354            | 13454959 | A | 0    | 0.2143 | T |
| 36 | BICF2P1029676           | 13465556 | A | 0.75 | 0.5    | G |
| 36 | BICF2P1083097           | 13470945 | G | 1    | 1      | A |
| 36 | BICF2S23441272          | 13481138 | A | 0.25 | 0.5    | G |
| 36 | BICF2P1146814           | 13490131 | A | 1    | 1      | G |
| 36 | BICF2P251589            | 13508250 | 0 | 0    | 0      | A |
| 36 | BICF2P182894            | 13515509 | 0 | 0    | 0      | G |
| 36 | BICF2P1277166           | 13531327 | 0 | 0    | 0      | A |
| 36 | BICF2P969625            | 13544905 | A | 1    | 1      | G |
| 36 | BICF2S23514752          | 13562012 | 0 | 0    | 0      | A |
| 36 | BICF2P1349554           | 13574782 | 0 | 0    | 0      | G |
| 36 | BICF2P702682            | 13588877 | 0 | 0    | 0      | G |
| 36 | BICF2S23736084          | 13599694 | 0 | 0    | 0      | G |
| 36 | TIGRP2P412229_rs9243755 | 13611178 | 0 | 0    | 0      | A |
| 36 | BICF2S23639562          | 13617016 | 0 | 0    | 0      | G |
| 36 | BICF2S2337355           | 13628915 | G | 0    | 0.2143 | A |
| 36 | BICF2P494153            | 13639067 | A | 0    | 0.2143 | G |
| 36 | BICF2P969589            | 13669725 | G | 0    | 0      | A |
| 36 | BICF2P979965            | 13677628 | G | 0    | 0      | A |
| 36 | BICF2P784258            | 13695711 | A | 0    | 0      | G |
| 36 | BICF2S23294             | 13697099 | A | 0.75 | 0.5    | G |
| 36 | BICF2S22960125          | 13709731 | A | 1    | 1      | G |
| 36 | BICF2P1355804           | 13720667 | A | 0    | 0      | G |
| 36 | BICF2P1131684           | 13734870 | 0 | 0    | 0      | A |
| 36 | BICF2P572519            | 13742937 | A | 0.25 | 0.5    | G |
| 36 | BICF2P89886             | 13754875 | A | 0.75 | 0.5    | G |
| 36 | BICF2P979697            | 13771406 | A | 0    | 0      | G |
| 36 | BICF2P674728            | 13785660 | 0 | 0    | 0      | G |
| 36 | BICF2P911958            | 13799274 | 0 | 0    | 0      | A |
| 36 | BICF2P807466            | 13810540 | A | 1    | 1      | G |
| 36 | BICF2P1072763           | 13813846 | C | 0.25 | 0.5    | A |
| 36 | BICF2S23737162          | 13826925 | A | 1    | 1      | G |
| 36 | BICF2S24111719          | 13843099 | G | 0    | 0      | C |
| 36 | BICF2P164388            | 13851836 | G | 0.25 | 0.5    | A |
| 36 | BICF2S22936430          | 13860935 | C | 0    | 0      | A |
| 36 | BICF2P1321465           | 13887918 | C | 1    | 1      | A |
| 36 | BICF2P481330            | 13894283 | G | 0.75 | 0.5    | A |
| 36 | BICF2P499457            | 13920062 | A | 0    | 0      | T |
| 36 | BICF2P857934            | 13931225 | 0 | 0    | 0      | A |
| 36 | BICF2P997286            | 13948006 | A | 0    | 0      | C |
| 36 | BICF2P307639            | 13954019 | A | 1    | 1      | G |
| 36 | BICF2P1046291           | 13972050 | A | 0.25 | 0.5    | G |
| 36 | BICF2P1220295           | 13977290 | C | 0.25 | 0.5    | A |
| 36 | BICF2P921775            | 13986530 | A | 0.25 | 0.5    | G |
| 36 | BICF2P1060983           | 14000646 | 0 | 0    | 0      | G |
| 36 | TIGRP2P412239_rs9208423 | 14011925 | 0 | 0    | 0      | G |
| 36 | BICF2P459565            | 14019572 | A | 0    | 0      | G |

|    |                         |          |   |      |        |   |
|----|-------------------------|----------|---|------|--------|---|
| 36 | BICF2P704631            | 14040409 | G | 0.25 | 0.5    | A |
| 36 | BICF2P197170            | 14052089 | A | 0.25 | 0.5    | C |
| 36 | BICF2P496232            | 14060061 | G | 0.25 | 0.5    | A |
| 36 | BICF2S23751938          | 14071137 | A | 0.25 | 0.5    | C |
| 36 | BICF2P507970            | 14095039 | A | 0.25 | 0.5    | C |
| 36 | BICF2P322787            | 14103516 | G | 0.25 | 0.5    | A |
| 36 | TIGRP2P412241_rs8986526 | 14119956 | 0 | 0    | 0      | G |
| 36 | BICF2P152310            | 14124699 | G | 0.25 | 0.5    | A |
| 36 | BICF2P1424508           | 14137491 | A | 0.25 | 0.5    | G |
| 36 | BICF2S23344459          | 14155539 | A | 1    | 0.5    | C |
| 36 | BICF2P237112            | 14157826 | G | 1    | 1      | A |
| 36 | BICF2P1485930           | 14177896 | G | 0    | 0      | A |
| 36 | BICF2P437313            | 14186884 | A | 0.25 | 0.5    | C |
| 36 | BICF2P299076            | 14193490 | G | 0.25 | 0.5    | A |
| 36 | BICF2P294091            | 14224083 | G | 0    | 0      | A |
| 36 | BICF2S23311428          | 14234158 | G | 0    | 0      | A |
| 36 | BICF2P661564            | 14241759 | A | 0    | 0      | G |
| 36 | BICF2P1060448           | 14257306 | A | 1    | 1      | G |
| 36 | BICF2S2298229           | 14265020 | G | 1    | 1      | A |
| 36 | BICF2S2395010           | 14287773 | A | 0.75 | 0.5    | G |
| 36 | BICF2S234341            | 14314985 | A | 0.25 | 0.5    | G |
| 36 | BICF2P18174             | 14321278 | G | 0.75 | 0.5    | C |
| 36 | BICF2P1362335           | 14322084 | A | 0    | 0      | G |
| 36 | BICF2P1173232           | 14333934 | A | 0.25 | 0.5    | G |
| 36 | BICF2P1045367           | 14347102 | A | 0    | 0      | G |
| 36 | BICF2P171955            | 14354829 | 0 | 0    | 0      | G |
| 36 | BICF2P1120407           | 14373989 | G | 0    | 0      | A |
| 36 | BICF2S23613940          | 14375695 | A | 0    | 0      | G |
| 36 | BICF2P1031052           | 14389919 | C | 0    | 0      | A |
| 36 | BICF2P417801            | 14409280 | A | 0    | 0      | G |
| 36 | BICF2P892130            | 14414092 | G | 0.75 | 0.5    | A |
| 36 | BICF2P1207336           | 14430370 | G | 0.75 | 0.5    | A |
| 36 | BICF2P1110708           | 14442474 | 0 | 0    | 0      | A |
| 36 | BICF2P938662            | 14461375 | A | 1    | 1      | C |
| 36 | BICF2P1440514           | 14467513 | 0 | 0    | 0      | A |
| 36 | BICF2P1084469           | 14485105 | 0 | 0    | 0      | A |
| 36 | BICF2P634795            | 14499339 | G | 0.75 | 0.5    | A |
| 36 | BICF2P377389            | 14502955 | A | 0.75 | 0.5    | G |
| 36 | BICF2P143987            | 14513266 | G | 0    | 0      | A |
| 36 | BICF2P1222358           | 14532894 | A | 0.25 | 0.5    | C |
| 36 | BICF2S23029606          | 14566951 | 0 | 0    | 0      | G |
| 36 | BICF2S23036689          | 14579460 | A | 0    | 0.5    | G |
| 36 | BICF2S2315676           | 14588751 | G | 1    | 0.8571 | A |
| 36 | BICF2S23427097          | 14604707 | A | 0.25 | 0.5    | G |
| 36 | BICF2P530486            | 14611124 | A | 0.25 | 0.5    | G |
| 36 | BICF2P894281            | 14622169 | 0 | 0    | 0      | A |
| 36 | BICF2P21313             | 14631482 | 0 | 0    | 0      | A |



|    |                         |          |   |      |        |   |
|----|-------------------------|----------|---|------|--------|---|
| 36 | BICF2S23511280          | 14673756 | A | 0    | 0      | C |
| 36 | BICF2S2418051           | 14679932 | A | 1    | 1      | G |
| 36 | BICF2S23650649          | 14717358 | G | 0    | 0      | A |
| 36 | BICF2S2394760           | 14723146 | A | 0    | 0      | G |
| 36 | BICF2S2446727           | 14733396 | A | 1    | 1      | G |
| 36 | BICF2P356115            | 14749558 | G | 0    | 0      | A |
| 36 | BICF2P679236            | 14761633 | 0 | 0    | 0      | A |
| 36 | BICF2P796424            | 14776713 | 0 | 0    | 0      | G |
| 36 | BICF2P458622            | 14778284 | 0 | 0    | 0      | G |
| 36 | BICF2S23627021          | 14798926 | G | 0    | 0      | A |
| 36 | BICF2P675564            | 14810069 | A | 0    | 0      | T |
| 36 | BICF2P1068240           | 14821878 | A | 0    | 0      | G |
| 36 | BICF2P452220            | 14834620 | A | 0    | 0      | G |
| 36 | BICF2S23518133          | 14854514 | A | 0    | 0      | G |
| 36 | BICF2S23527301          | 14858019 | G | 0    | 0      | A |
| 36 | BICF2S24414681          | 14884521 | A | 0.25 | 0.5    | G |
| 36 | BICF2S23630270          | 14894552 | A | 0    | 0      | T |
| 36 | BICF2P884491            | 14909876 | 0 | 0    | 0      | A |
| 36 | BICF2P1165355           | 14932776 | 0 | 0    | 0      | A |
| 36 | BICF2S23613068          | 14972130 | C | 0.75 | 0.5    | A |
| 36 | BICF2S23231298          | 14987141 | G | 0    | 0      | A |
| 36 | BICF2P760383            | 14996847 | 0 | 0    | 0      | T |
| 36 | BICF2S23245773          | 15028509 | C | 0    | 0      | A |
| 36 | BICF2P346415            | 15053242 | G | 0    | 0      | A |
| 36 | TIGRP2P412264_rs8744830 | 15054846 | 0 | 0    | 0      | A |
| 36 | BICF2P696890            | 15075058 | G | 0.75 | 0.5    | A |
| 36 | BICF2P491239            | 15078849 | G | 0.25 | 0.2857 | A |
| 36 | BICF2P1324583           | 15094381 | A | 1    | 0.7857 | G |
| 36 | BICF2P826870            | 15100573 | A | 1    | 0.7857 | G |
| 36 | BICF2P1045233           | 15116179 | G | 0    | 0.2143 | A |
| 36 | BICF2P551326            | 15128612 | A | 0    | 0      | G |
| 36 | BICF2P908903            | 15140423 | 0 | 0    | 0      | A |
| 36 | BICF2P657983            | 15149758 | G | 0.25 | 0.5    | A |
| 36 | BICF2S23750034          | 15161890 | G | 0.25 | 0.5    | A |
| 36 | BICF2P1221213           | 15182518 | 0 | 0    | 0      | A |
| 36 | BICF2P882081            | 15209677 | 0 | 0    | 0      | A |
| 36 | BICF2P544172            | 15226026 | 0 | 0    | 0      | A |
| 36 | BICF2S23246452          | 15245087 | G | 0    | 0      | A |
| 36 | BICF2S23742213          | 15263489 | A | 0.25 | 0.2857 | C |
| 36 | BICF2S23638250          | 15272138 | G | 0    | 0      | A |
| 36 | BICF2S23319017          | 15291181 | A | 0    | 0.2143 | C |
| 36 | BICF2S2367034           | 15299767 | C | 1    | 0.7857 | A |
| 36 | BICF2P1460049           | 15323545 | G | 0    | 0      | A |
| 36 | BICF2P564484            | 15330144 | 0 | 0    | 0      | A |
| 36 | BICF2P492284            | 15341816 | 0 | 0    | 0      | A |
| 36 | BICF2S2325859           | 15356927 | A | 1    | 0.7857 | C |
| 36 | BICF2P1123975           | 15365927 | G | 0.25 | 0.5    | A |

|    |                 |          |   |      |        |   |
|----|-----------------|----------|---|------|--------|---|
| 36 | BICF2S2434367   | 15389393 | A | 0    | 0      | G |
| 36 | BICF2P1093332   | 15413569 | A | 0    | 0      | T |
| 36 | BICF2P275721    | 15439663 | 0 | 0    | 0      | A |
| 36 | BICF2P1385486   | 15446211 | G | 1    | 1      | A |
| 36 | BICF2S23523505  | 15464116 | G | 1    | 1      | A |
| 36 | BICF2P343009    | 15476980 | C | 1    | 1      | A |
| 36 | BICF2P549374    | 15483990 | G | 1    | 0.7857 | A |
| 36 | BICF2S23414423  | 15493895 | A | 0    | 0      | G |
| 36 | BICF2P245753    | 15504549 | A | 0    | 0      | G |
| 36 | BICF2P941101    | 15519540 | G | 0    | 0      | A |
| 36 | BICF2P478348    | 15533356 | G | 0    | 0      | A |
| 36 | BICF2P791621    | 15542921 | C | 0.25 | 0.5    | A |
| 36 | BICF2S23331848  | 15564214 | C | 0.25 | 0.5    | A |
| 36 | BICF2P355341    | 15579739 | G | 0    | 0      | A |
| 36 | BICF2P1340325   | 15593176 | A | 0    | 0      | G |
| 36 | BICF2P1340326   | 15595018 | G | 0    | 0      | A |
| 36 | BICF2P1238006   | 15606883 | A | 0    | 0      | G |
| 36 | BICF2P313584    | 15625687 | 0 | 0    | 0      | A |
| 36 | BICF2P1439424   | 15633668 | G | 0    | 0      | A |
| 36 | BICF2S23135820  | 15642439 | 0 | 0    | 0      | A |
| 36 | BICF2P956222    | 15666111 | 0 | 0    | 0      | A |
| 36 | BICF2P1367114   | 15684894 | A | 0    | 0      | G |
| 36 | BICF2P992304    | 15693889 | A | 0    | 0      | G |
| 36 | BICF2P664667    | 15704776 | G | 1    | 0.7857 | A |
| 36 | BICF2S23448311  | 15711488 | G | 0    | 0      | A |
| 36 | BICF2P1226745   | 15726542 | G | 0.25 | 0.5    | A |
| 36 | BICF2P70891     | 15735865 | C | 0.25 | 0.5    | A |
| 36 | BICF2P705144    | 15753510 | G | 0.25 | 0.5    | A |
| 36 | BICF2S2379706   | 15761596 | A | 0    | 0      | C |
| 36 | BICF2S23044647  | 15770910 | A | 0    | 0.2143 | G |
| 36 | BICF2P1378528   | 15782599 | T | 0    | 0.2143 | A |
| 36 | BICF2P1500508   | 15797639 | A | 0    | 0      | G |
| 36 | BICF2P664539    | 15801874 | G | 0    | 0      | A |
| 36 | BICF2P867689    | 15817953 | G | 0    | 0      | A |
| 36 | BICF2P906964    | 15832348 | 0 | 0    | 0      | C |
| 36 | BICF2P636730    | 15839266 | G | 0    | 0      | A |
| 36 | BICF2P488631    | 15897804 | C | 0.75 | 0.7143 | A |
| 36 | BICF2P1316950   | 15914246 | 0 | 0    | 0      | A |
| 36 | BICF2P780568    | 15924658 | A | 0    | 0      | G |
| 36 | BICF2P533119    | 15928233 | A | 0    | 0      | G |
| 36 | BICF2G630762362 | 15950426 | G | 0    | 0      | A |
| 36 | BICF2G630762340 | 15964413 | G | 0.25 | 0.2857 | A |
| 36 | BICF2G630762321 | 15980412 | G | 0.75 | 0.7143 | A |
| 36 | BICF2P461061    | 15983057 | A | 0    | 0      | G |
| 36 | BICF2G630762302 | 15992255 | G | 0.25 | 0.2857 | A |
| 36 | BICF2P699405    | 16009743 | C | 0    | 0      | A |
| 36 | BICF2G630762262 | 16032435 | A | 0.25 | 0.2857 | G |

|    |                 |          |   |      |        |   |
|----|-----------------|----------|---|------|--------|---|
| 36 | BICF2G630762230 | 16045813 | A | 0.25 | 0.2857 | G |
| 36 | BICF2G630762210 | 16055981 | C | 0.75 | 0.7143 | A |
| 36 | BICF2P1854      | 16077758 | A | 0.75 | 0.7143 | G |
| 36 | BICF2S23623102  | 16088586 | G | 0.75 | 0.7143 | A |
| 36 | G1477f60S317    | 16116960 | G | 0    | 0      | A |
| 36 | BICF2G630762189 | 16142020 | G | 0    | 0      | A |
| 36 | BICF2P325168    | 16146813 | G | 0    | 0      | A |
| 36 | BICF2S22963258  | 16163953 | A | 0    | 0      | G |
| 36 | BICF2P560477    | 16173944 | A | 0.25 | 0.25   | G |
| 36 | BICF2P1079104   | 16182278 | A | 0    | 0      | G |
| 36 | BICF2P1181603   | 16192796 | A | 0.25 | 0.25   | G |
| 36 | BICF2P723649    | 16204479 | G | 0    | 0.2857 | A |
| 36 | BICF2G630762172 | 16219407 | 0 | 0    | 0      | A |
| 36 | BICF2S23620787  | 16226840 | C | 0    | 0      | A |
| 36 | BICF2P985124    | 16271387 | 0 | 0    | 0      | A |
| 36 | BICF2P368060    | 16289131 | A | 0    | 0      | G |
| 36 | BICF2S2398236   | 16299254 | A | 0    | 0      | G |
| 36 | BICF2S23241489  | 16392364 | C | 0    | 0      | A |
| 36 | BICF2P136786    | 16410083 | 0 | 0    | 0      | G |
| 36 | BICF2S23523554  | 16433623 | C | 0    | 0      | A |
| 36 | BICF2P1351245   | 16466918 | A | 1    | 1      | G |
| 36 | BICF2P1351244   | 16468027 | A | 1    | 1      | G |
| 36 | BICF2S23630811  | 16486555 | G | 0.75 | 0.7143 | A |
| 36 | BICF2P1092047   | 16495678 | A | 0    | 0      | C |
| 36 | BICF2P1203537   | 16509692 | 0 | 0    | 0      | A |
| 36 | BICF2S23516972  | 16521662 | A | 0.75 | 0.7143 | G |
| 36 | BICF2S23525314  | 16569203 | A | 0    | 0      | G |
| 36 | BICF2S23622198  | 16593024 | C | 0    | 0      | G |
| 36 | BICF2P228033    | 16596917 | 0 | 0    | 0      | A |
| 36 | BICF2S23012339  | 16612419 | C | 0    | 0      | A |
| 36 | BICF2S2308174   | 16621546 | C | 0.25 | 0.25   | A |
| 36 | BICF2S23425273  | 16633212 | G | 0    | 0      | A |
| 36 | BICF2S23622348  | 16657881 | A | 0    | 0      | G |
| 36 | BICF2P634930    | 16664050 | A | 0    | 0      | C |
| 36 | BICF2P1308360   | 16676469 | G | 0.75 | 0.6    | A |
| 36 | BICF2P283049    | 16689009 | G | 1    | 0.5    | A |
| 36 | BICF2S23637222  | 16698403 | G | 0.5  | 0.375  | A |
| 36 | BICF2S23515988  | 16718988 | A | 0.25 | 0.2857 | G |
| 36 | BICF2S2348625   | 16749987 | G | 0.75 | 0.7    | A |
| 36 | BICF2S23157920  | 16756546 | A | 0.25 | 0.2857 | G |
| 36 | BICF2S23350889  | 16770295 | A | 0.25 | 0.2857 | G |
| 36 | BICF2S23023572  | 16781633 | A | 0.75 | 0.7143 | G |
| 36 | BICF2S2342138   | 16799059 | A | 0.25 | 0.2857 | G |
| 36 | BICF2S23244383  | 16810870 | C | 0.75 | 0.8    | A |
| 36 | BICF2P1227398   | 16830851 | 0 | 0    | 0      | G |
| 36 | BICF2P292691    | 16855815 | A | 0    | 0      | T |
| 36 | BICF2P1179933   | 16865894 | G | 0.75 | 0.7143 | A |

|    |                         |          |   |      |        |   |
|----|-------------------------|----------|---|------|--------|---|
| 36 | BICF2S23161873          | 16896237 | G | 1    | 1      | A |
| 36 | BICF2P5529              | 16912002 | A | 0    | 0      | C |
| 36 | BICF2P1302069           | 16923605 | C | 1    | 1      | A |
| 36 | BICF2P1302068           | 16923648 | G | 1    | 1      | C |
| 36 | BICF2S23736605          | 16927022 | T | 0    | 0      | A |
| 36 | BICF2P369918            | 16930109 | A | 1    | 1      | G |
| 36 | BICF2P908736            | 16943381 | C | NA   | NA     | A |
| 36 | BICF2P1307019           | 17000519 | A | 0.75 | 0.7143 | G |
| 36 | BICF2P160127            | 17017163 | A | 1    | 1      | G |
| 36 | BICF2P947469            | 17022234 | 0 | 0    | 0      | A |
| 36 | BICF2S2323451           | 17032971 | G | 1    | 1      | A |
| 36 | BICF2P79631             | 17048691 | G | 0    | 0      | A |
| 36 | BICF2P1021204           | 17065328 | 0 | 0    | 0      | C |
| 36 | BICF2S23533114          | 17095864 | G | 0.75 | 0.7143 | A |
| 36 | BICF2P684313            | 17110235 | A | 0    | 0      | G |
| 36 | BICF2P611451            | 17195852 | C | 0    | 0      | A |
| 36 | BICF2P1169409           | 17204374 | G | 0    | 0      | A |
| 36 | BICF2P516680            | 17230489 | A | 0    | 0      | G |
| 36 | BICF2P866869            | 17244342 | G | 1    | 1      | A |
| 36 | BICF2P694847            | 17280474 | A | 1    | 1      | G |
| 36 | BICF2P431212            | 17292869 | G | 1    | 1      | A |
| 36 | BICF2P947075            | 17315424 | T | 1    | 1      | A |
| 36 | BICF2P71033             | 17325583 | G | 0    | 0      | A |
| 36 | BICF2P560868            | 17338317 | A | 0    | 0      | G |
| 36 | BICF2P329217            | 17348601 | A | 0    | 0      | C |
| 36 | BICF2S23112685          | 17357538 | G | 0    | 0      | A |
| 36 | BICF2P596842            | 17382216 | T | 0    | 0      | A |
| 36 | BICF2P392385            | 17396318 | A | 0    | 0      | T |
| 36 | BICF2S22912828          | 17415609 | G | 1    | 1      | A |
| 36 | BICF2P43223             | 17427251 | C | 0    | 0      | A |
| 36 | BICF2P1262089           | 17435007 | G | 0    | 0      | A |
| 36 | BICF2P948577            | 17448299 | G | 0.25 | 0.2857 | A |
| 36 | BICF2P1322314           | 17468964 | 0 | 0    | 0      | A |
| 36 | BICF2P451012            | 17494806 | A | 0    | 0      | G |
| 36 | BICF2S23532769          | 17510850 | A | 0    | 0      | G |
| 36 | BICF2P882457            | 17554006 | 0 | 0    | 0      | G |
| 36 | BICF2P777793            | 17584199 | C | 0.25 | 0.2857 | A |
| 36 | BICF2P269622            | 17626866 | 0 | 0    | 0      | G |
| 36 | BICF2P251104            | 17639310 | 0 | 0    | 0      | A |
| 36 | BICF2S23151838          | 17657665 | C | 0.75 | 0.7143 | A |
| 36 | BICF2S23713787          | 17743689 | A | 0.5  | 0.6    | G |
| 36 | BICF2P313081            | 17753847 | 0 | 0    | 0      | G |
| 36 | BICF2P1201427           | 17788992 | A | 0    | 0      | G |
| 36 | BICF2P63278             | 17818726 | 0 | 0    | 0      | G |
| 36 | TIGRP2P412329_rs9199885 | 17869603 | 0 | 0    | 0      | A |
| 36 | BICF2P660476            | 17981875 | A | 0    | 0.2857 | G |
| 36 | G1481f49S235            | 18014108 | A | 0.25 | 0.2857 | G |

|    |                         |          |   |      |        |   |
|----|-------------------------|----------|---|------|--------|---|
| 36 | G1482f41S187            | 18059447 | A | 0.75 | 0.7143 | C |
| 36 | BICF2P1058504           | 18082478 | G | 0.25 | 0.2857 | A |
| 36 | BICF2P829287            | 18124187 | 0 | 0    | 0      | A |
| 36 | BICF2P987640            | 18164825 | 0 | 0    | 0      | G |
| 36 | BICF2S23623163          | 18255836 | A | 0    | 0      | G |
| 36 | BICF2S23030365          | 18263207 | G | 0.75 | 0.7143 | A |
| 36 | BICF2S2361476           | 18280992 | G | 0.75 | 0.7143 | A |
| 36 | BICF2P118790            | 18346949 | G | 0    | 0      | A |
| 36 | BICF2P1052995           | 18373931 | A | 1    | 1      | C |
| 36 | BICF2S23718157          | 18393129 | A | 0.25 | 0.2857 | G |
| 36 | BICF2P1183503           | 18425257 | C | 0    | 0      | G |
| 36 | BICF2P12960             | 18435352 | A | 0    | 0      | G |
| 36 | BICF2P486953            | 18445197 | G | 1    | 1      | A |
| 36 | BICF2S23156954          | 18452613 | G | 0    | 0      | A |
| 36 | BICF2S23059777          | 18471976 | A | 1    | 1      | G |
| 36 | BICF2P1232233           | 18491285 | A | 0    | 0      | G |
| 36 | BICF2P1232229           | 18493953 | C | 0    | 0      | G |
| 36 | BICF2P903932            | 18504449 | A | 0    | 0      | G |
| 36 | BICF2P1398741           | 18530562 | 0 | 0    | 0      | A |
| 36 | BICF2P632632            | 18552995 | G | 0.25 | 0.2857 | A |
| 36 | BICF2P1166122           | 18561205 | A | 0.25 | 0.2857 | C |
| 36 | BICF2P1107517           | 18576022 | A | 0    | 0      | T |
| 36 | BICF2S23717656          | 18597051 | A | 0.25 | 0.2857 | C |
| 36 | BICF2S23618631          | 18609372 | A | 0    | 0      | G |
| 36 | BICF2P995419            | 18625496 | A | 0    | 0      | C |
| 36 | BICF2S2308239           | 18634311 | A | 0.25 | 0.2857 | G |
| 36 | BICF2P927697            | 18659370 | A | 0.25 | 0.2857 | G |
| 36 | BICF2P1399555           | 18669195 | G | 0.25 | 0.2857 | A |
| 36 | BICF2P992329            | 18687233 | A | 0.5  | 0.4    | T |
| 36 | BICF2S2314997           | 18696895 | G | 0.5  | 0.5    | A |
| 36 | BICF2P822199            | 18709666 | 0 | 0    | 0      | G |
| 36 | TIGRP2P412340_rs8676763 | 18744728 | 0 | 0    | 0      | G |
| 36 | BICF2P764256            | 18750129 | C | 0.25 | 0.2857 | A |
| 36 | BICF2P1452837           | 18760786 | G | 0    | 0      | A |
| 36 | BICF2P327793            | 18775433 | G | NA   | 0      | A |
| 36 | BICF2S232272            | 18782394 | A | 0.75 | 0.7143 | G |
| 36 | BICF2P1357298           | 18810791 | A | 0    | 0      | C |
| 36 | BICF2P292053            | 18820366 | C | 1    | 1      | G |
| 36 | BICF2P1080684           | 18823713 | A | 1    | 1      | T |
| 36 | BICF2P781788            | 18828374 | G | 0    | 0      | A |
| 36 | BICF2P742183            | 18838099 | G | 0    | 0      | A |
| 36 | BICF2P188811            | 18857312 | G | 0    | 0      | A |
| 36 | BICF2P1188319           | 18861579 | G | 0.75 | 0.5    | A |
| 36 | G1485f22S245            | 18880881 | 0 | 0    | 0      | G |
| 36 | BICF2S23640350          | 18903534 | G | 0    | 0      | A |
| 36 | BICF2S23133120          | 18925068 | 0 | 0    | 0      | G |
| 36 | BICF2S23047398          | 18938158 | C | 0.75 | 0.7143 | G |

|    |                         |          |   |      |        |   |
|----|-------------------------|----------|---|------|--------|---|
| 36 | BICF2S23048265          | 18942169 | G | 0.75 | 0.7143 | A |
| 36 | BICF2P17463             | 18957389 | G | 0    | 0      | A |
| 36 | BICF2P753947            | 18981277 | 0 | 0    | 0      | A |
| 36 | BICF2S23043402          | 18989502 | G | 0.25 | 0.2857 | A |
| 36 | BICF2P789048            | 19002769 | A | 0    | 0      | G |
| 36 | BICF2P534867            | 19010057 | A | 0.75 | 0.7143 | G |
| 36 | BICF2P350268            | 19020561 | T | 0    | 0      | A |
| 36 | BICF2S22954340          | 19022049 | A | 0.25 | 0.2857 | G |
| 36 | BICF2S23161391          | 19032978 | A | 0.75 | 0.7143 | C |
| 36 | BICF2S23248542          | 19050593 | C | 0.75 | 0.7143 | A |
| 36 | BICF2P768702            | 19055772 | G | 0.25 | 0.2857 | A |
| 36 | TIGRP2P412362_rs9205338 | 19068819 | G | 0    | 0      | A |
| 36 | BICF2P1102968           | 19078999 | A | 0    | 0      | G |
| 36 | BICF2P812833            | 19095185 | A | NA   | 0      | G |
| 36 | TIGRP2P412389_rs8840383 | 19105782 | A | 0    | 0      | G |
| 36 | BICF2P941858            | 19121497 | T | 0    | 0      | A |
| 36 | BICF2P1059115           | 19135893 | A | 0    | 0      | G |
| 36 | BICF2P109713            | 19137051 | 0 | 0    | 0      | A |
| 36 | TIGRP2P412392_rs8969957 | 19160509 | G | 0    | 0      | A |
| 36 | BICF2P570679            | 19178021 | G | 0    | 0      | A |
| 36 | BICF2P802274            | 19186938 | G | 0    | 0      | A |
| 36 | TIGRP2P412400_rs8605990 | 19209623 | A | 0    | 0      | G |
| 36 | BICF2S23746958          | 19216118 | G | NA   | 0      | A |
| 36 | TIGRP2P412402_rs9061681 | 19218606 | A | 0    | 0      | G |
| 36 | BICF2P1166863           | 19246806 | G | 0.5  | 0.5    | A |
| 36 | BICF2P133005            | 19293019 | A | 0.5  | 0.5    | T |
| 36 | TIGRP2P412417_rs9215860 | 19306233 | G | 0.75 | 0.7143 | A |
| 36 | BICF2P281015            | 19317619 | 0 | 0    | 0      | G |
| 36 | BICF2P223847            | 19323840 | G | 0    | 0      | A |
| 36 | TIGRP2P412448_rs8508627 | 19341552 | A | 0    | 0      | G |
| 36 | BICF2P1185437           | 19346996 | A | 0.75 | 0.7143 | G |
| 36 | BICF2P738176            | 19356605 | C | 0.75 | 0.7143 | A |
| 36 | TIGRP2P412469_rs8955855 | 19369948 | G | 0.75 | 0.7143 | A |
| 36 | TIGRP2P412478_rs8841405 | 19385600 | G | 0.75 | 0.7143 | A |
| 36 | BICF2P1343608           | 19395625 | A | 1    | 0.7143 | G |
| 36 | TIGRP2P412487_rs8659893 | 19404068 | G | 0.75 | 0.7143 | A |
| 36 | BICF2P1363106           | 19420934 | A | 0    | 0      | G |
| 36 | TIGRP2P412503_rs8958927 | 19431672 | G | 0    | 0      | A |
| 36 | TIGRP2P412536_rs9128468 | 19444409 | A | 0    | 0      | C |
| 36 | TIGRP2P412538_rs8910401 | 19446789 | A | 0    | 0      | G |
| 36 | BICF2P169668            | 19461517 | A | 0    | 0      | G |
| 36 | BICF2P8433              | 19470629 | 0 | 0    | 0      | G |
| 36 | BICF2P790169            | 19482881 | G | 0.75 | 0.7143 | A |
| 36 | BICF2P1181631           | 19501884 | G | 0    | 0      | A |
| 36 | BICF2S2331174           | 19509847 | A | 0    | 0      | G |
| 36 | BICF2S23419749          | 19526576 | A | 0.25 | 0.2857 | G |
| 36 | BICF2P1238099           | 19530109 | T | 0.25 | 0.2857 | A |

|    |                         |          |   |      |        |   |
|----|-------------------------|----------|---|------|--------|---|
| 36 | TIGRP2P412569_rs9182871 | 19545778 | A | 0    | 0      | G |
| 36 | BICF2S23119670          | 19550209 | A | 0    | 0      | G |
| 36 | TIGRP2P412577_rs9244864 | 19570578 | G | 0    | 0      | A |
| 36 | BICF2P28396             | 19571326 | A | 0.25 | 0.2857 | G |
| 36 | BICF2S2322073           | 19575376 | A | 0    | 0      | G |
| 36 | TIGRP2P412582_rs9129167 | 19592268 | G | 0    | 0      | A |
| 36 | TIGRP2P412588_rs8738163 | 19601065 | 0 | 0    | 0      | C |
| 36 | BICF2P686410            | 19614539 | A | 0    | 0      | G |
| 36 | BICF2G630762141         | 19620666 | A | 0    | 0      | G |
| 36 | BICF2S23524181          | 19639939 | G | 0    | 0      | A |
| 36 | BICF2G630762102         | 19645021 | G | 0.25 | 0.25   | A |
| 36 | BICF2G630762081         | 19657734 | A | 0    | 0      | G |
| 36 | BICF2G630762041         | 19670791 | G | 0    | 0      | A |
| 36 | BICF2G630762030         | 19677514 | G | 0    | 0      | A |
| 36 | BICF2G630761997         | 19694834 | A | 0    | 0      | G |
| 36 | BICF2P1345496           | 19695516 | A | 0    | 0      | G |
| 36 | BICF2P578596            | 19703014 | A | 0    | 0.2857 | G |
| 36 | BICF2P526422            | 19714864 | A | 0    | 0      | G |
| 36 | BICF2P596084            | 19725902 | A | 0.75 | 0.7143 | G |
| 36 | BICF2P726353            | 19737644 | A | 0    | 0      | G |
| 36 | BICF2P587501            | 19755932 | T | 0    | 0      | A |
| 36 | BICF2P859044            | 19758316 | C | 0.25 | 0.2857 | A |
| 36 | BICF2P1049247           | 19770137 | C | 0    | 0      | A |
| 36 | TIGRP2P412628_rs8749847 | 19784707 | A | 0    | 0      | G |
| 36 | BICF2P1061337           | 19794645 | G | 0    | 0      | A |
| 36 | BICF2S23120937          | 19812608 | A | 0    | 0      | G |
| 36 | BICF2P626059            | 19816653 | G | 0    | 0      | A |
| 36 | BICF2S23443212          | 19836266 | A | 0.25 | 0.2857 | G |
| 36 | BICF2P3915              | 19844401 | A | 0.25 | 0.2857 | G |
| 36 | TIGRP2P412638_rs8742769 | 19853237 | G | 0    | 0      | A |
| 36 | BICF2P507169            | 19868979 | 0 | 0    | 0      | A |
| 36 | BICF2P66880             | 19873886 | 0 | 0    | 0      | A |
| 36 | BICF2P66884             | 19874082 | G | 1    | 1      | A |
| 36 | BICF2G630761948         | 19898851 | G | 1    | 1      | A |
| 36 | BICF2G630761938         | 19909223 | G | 0.25 | 0.2857 | A |
| 36 | BICF2G630761935         | 19910401 | G | 0.25 | 0.2857 | A |
| 36 | BICF2P406101            | 19934568 | C | 0.5  | 0.5    | A |
| 36 | BICF2S2449649           | 19951028 | A | 0.5  | 0.5    | G |
| 36 | BICF2P1276868           | 19960222 | G | 0.5  | 0.5    | A |
| 36 | TIGRP2P412677_rs8792276 | 19974725 | A | 0.5  | 0.5    | G |
| 36 | BICF2P593194            | 19977011 | G | 0.5  | 0.5    | A |
| 36 | BICF2P541345            | 19993216 | G | 0.5  | 0.5    | A |
| 36 | BICF2P975576            | 20005135 | G | 0.5  | 0.5    | A |
| 36 | BICF2S23329046          | 20011423 | G | 0.5  | 0.5    | C |
| 36 | BICF2G630761924         | 20025234 | A | 0.5  | 0.5    | C |
| 36 | BICF2G630761914         | 20033402 | A | 0.5  | 0.5    | G |
| 36 | BICF2G630761887         | 20051785 | A | 0.5  | 0.5    | G |

|    |                         |          |   |      |        |   |
|----|-------------------------|----------|---|------|--------|---|
| 36 | BICF2P770115            | 20056777 | G | 0.5  | 0.5    | A |
| 36 | BICF2G630761878         | 20073548 | G | 0    | 0      | A |
| 36 | TIGRP2P412693_rs8697614 | 20080969 | C | 0.75 | 0.7857 | A |
| 36 | BICF2S23240423          | 20103086 | A | 0    | 0      | G |
| 36 | BICF2S23347235          | 20118061 | G | 0.25 | 0.2857 | A |
| 36 | TIGRP2P412714_rs8900166 | 20129219 | A | 0.25 | 0.2857 | G |
| 36 | BICF2G630761857         | 20138504 | G | 0.25 | 0.2857 | A |
| 36 | BICF2G630761835         | 20149317 | 0 | 0    | 0      | C |
| 36 | BICF2G630761832         | 20171110 | A | 0.75 | 0.7143 | G |
| 36 | BICF2P1346456           | 20188742 | G | 0    | 0      | A |
| 36 | BICF2P1352051           | 20196669 | A | 0.75 | 0.7143 | G |
| 36 | BICF2G630761819         | 20211780 | 0 | 0    | 0      | G |
| 36 | TIGRP2P412735_rs8574622 | 20218383 | A | 0    | 0      | G |
| 36 | BICF2P1089372           | 20233172 | G | 0    | 0      | A |
| 36 | TIGRP2P412753_rs8758962 | 20242039 | A | 0    | 0      | G |
| 36 | BICF2P1024440           | 20252715 | A | 0    | 0      | T |
| 36 | BICF2P400499            | 20269801 | G | 0.25 | 0.2857 | A |
| 36 | BICF2S23617836          | 20272439 | A | 0.25 | 0.2857 | G |
| 36 | BICF2P393138            | 20272864 | A | 0.25 | 0.2857 | G |
| 36 | TIGRP2P412767_rs9186210 | 20284345 | C | 0    | 0      | G |
| 36 | BICF2G630761795         | 20295434 | G | 0.25 | 0.2143 | A |
| 36 | BICF2G630761789         | 20300830 | G | 0.25 | 0.2143 | A |
| 36 | BICF2G630761782         | 20312599 | A | 0    | 0      | G |
| 36 | BICF2G630761772         | 20321985 | C | 0.5  | 0.5    | A |
| 36 | BICF2P1273138           | 20334026 | G | 0.5  | 0.5    | A |
| 36 | BICF2S23634863          | 20350025 | C | 0    | 0      | A |
| 36 | BICF2P617327            | 20358964 | G | 0.25 | 0.2857 | A |
| 36 | BICF2S23050958          | 20381377 | G | 0    | 0      | C |
| 36 | BICF2G630761759         | 20395747 | A | 0    | 0.25   | C |
| 36 | BICF2G630761750         | 20411885 | C | 0.25 | 0.2143 | A |
| 36 | BICF2G630761749         | 20412159 | A | 0.75 | 0.7143 | G |
| 36 | BICF2P946548            | 20414053 | A | 0.25 | 0.2857 | G |
| 36 | BICF2G630761723         | 20425505 | G | 0.75 | 0.7143 | A |
| 36 | TIGRP2P412791_rs9024044 | 20435991 | G | 1    | 1      | A |
| 36 | BICF2G630761699         | 20452560 | A | 0.25 | 0.2143 | G |
| 36 | BICF2G630761693         | 20461530 | A | 1    | 1      | G |
| 36 | BICF2G630761685         | 20476454 | A | 0.5  | 0.5    | G |
| 36 | BICF2G630761680         | 20484660 | A | 0.75 | 0.7143 | G |
| 36 | BICF2G630761659         | 20494347 | A | 0.25 | 0.2857 | G |
| 36 | BICF2G630761653         | 20508115 | G | 0    | 0      | A |
| 36 | BICF2P204010            | 20525144 | 0 | 0    | 0      | G |
| 36 | BICF2G630761642         | 20538327 | C | 0    | 0      | A |
| 36 | BICF2P99223             | 20543205 | A | 0.5  | 0.5    | C |
| 36 | BICF2P409070            | 20578078 | G | 0    | 0      | A |
| 36 | BICF2G630761618         | 20589284 | A | 1    | 1      | G |
| 36 | BICF2G630761595         | 20600175 | T | 0    | 0      | A |
| 36 | BICF2G630761583         | 20613388 | G | 0    | 0      | A |



|    |                         |          |   |      |        |   |
|----|-------------------------|----------|---|------|--------|---|
| 36 | BICF2G630761571         | 20622413 | G | 0.25 | 0.2143 | A |
| 36 | BICF2G630761566         | 20633718 | G | 0.25 | 0.2143 | A |
| 36 | BICF2G630761564         | 20651889 | G | 0    | 0      | A |
| 36 | BICF2P1239712           | 20656850 | A | 0    | 0      | G |
| 36 | BICF2S23126171          | 20671349 | A | 0.5  | 0.5    | G |
| 36 | TIGRP2P412811_rs9104072 | 20684508 | G | 0.5  | 0.5    | A |
| 36 | BICF2G630761558         | 20686491 | C | 0    | 0      | A |
| 36 | BICF2S232448            | 20694477 | A | 0    | 0      | G |
| 36 | BICF2P1471963           | 20704432 | A | 0.5  | 0.5    | G |
| 36 | BICF2P986586            | 20711126 | G | 0    | 0      | A |
| 36 | BICF2P1305749           | 20713234 | A | 0    | 0.2857 | G |
| 36 | BICF2P388713            | 20731665 | 0 | 0    | 0      | C |
| 36 | BICF2G630761545         | 20735519 | G | 0.75 | 0.7857 | A |
| 36 | BICF2P243388            | 20756824 | A | 0.25 | 0.2857 | T |
| 36 | BICF2G630761524         | 20758916 | G | 0    | 0      | A |
| 36 | BICF2G630761509         | 20771430 | G | 0.25 | 0.2857 | C |
| 36 | BICF2S23730983          | 20774270 | G | 0    | 0      | A |
| 36 | BICF2G630761489         | 20783708 | A | 0.75 | 0.7143 | G |
| 36 | TIGRP2P412848_rs8839711 | 20796666 | A | 0    | 0      | G |
| 36 | BICF2G630761456         | 20807462 | 0 | 0    | 0      | A |
| 36 | TIGRP2P412861_rs8792613 | 20815163 | G | 0.75 | 0.7143 | A |
| 36 | BICF2G630761451         | 20827593 | A | 0.25 | 0.2143 | G |
| 36 | BICF2G630761430         | 20842328 | C | 0.25 | 0.2143 | A |
| 36 | TIGRP2P412877_rs8973350 | 20853062 | A | 0    | 0      | G |
| 36 | BICF2G630761420         | 20864034 | A | 0    | 0      | G |
| 36 | BICF2G630761392         | 20874440 | G | 0.25 | 0.2143 | A |
| 36 | BICF2G630761383         | 20891681 | 0 | 0    | 0      | G |
| 36 | BICF2P497794            | 20899471 | G | 0.25 | 0.2857 | A |
| 36 | BICF2G630761347         | 20907327 | C | 0.5  | 0.5    | A |
| 36 | BICF2P694569            | 20916974 | G | 1    | 1      | A |
| 36 | BICF2P186384            | 20919177 | A | 1    | 1      | G |
| 36 | BICF2S23425523          | 20933042 | A | 0    | 0      | G |
| 36 | BICF2P150269            | 20950239 | A | 0.25 | 0.2143 | G |
| 36 | BICF2G630761308         | 20954681 | G | 0    | 0      | A |
| 36 | BICF2G630761307         | 20964785 | G | 0    | 0      | A |
| 36 | BICF2G630761258         | 20983640 | A | 0.25 | 0.2143 | G |
| 36 | BICF2G630761255         | 20984330 | A | 0.25 | 0.2143 | G |
| 36 | BICF2G630761210         | 21002038 | 0 | 0    | 0      | G |
| 36 | BICF2G630761171         | 21014429 | G | 0    | 0      | A |
| 36 | BICF2P1258804           | 21023303 | G | 0    | 0      | A |
| 36 | BICF2G630761149         | 21038428 | C | NA   | 0.5    | A |
| 36 | BICF2P436381            | 21046880 | G | 1    | 1      | A |
| 36 | TIGRP2P412939_rs8587907 | 21061001 | G | 0.5  | 0.5    | A |
| 36 | BICF2P247556            | 21078879 | A | 1    | 1      | G |
| 36 | BICF2P690118            | 21099227 | 0 | 0    | 0      | A |
| 36 | BICF2G630761140         | 21107334 | G | 0.25 | 0.2857 | A |
| 36 | BICF2P964447            | 21116803 | A | 0.5  | 0.5    | G |

|    |                         |          |   |      |        |   |
|----|-------------------------|----------|---|------|--------|---|
| 36 | BICF2G630761135         | 21117018 | G | 0.5  | 0.5    | A |
| 36 | BICF2G630761124         | 21123122 | A | 0    | 0      | C |
| 36 | BICF2G630761113         | 21129284 | G | 0.5  | 0.5    | A |
| 36 | BICF2G630761086         | 21144929 | G | 0    | 0      | A |
| 36 | BICF2G630761068         | 21152511 | G | 0    | 0      | A |
| 36 | BICF2G630761046         | 21161406 | A | 0.75 | 0.7857 | G |
| 36 | BICF2S24320977          | 21179959 | A | 0.5  | 0.5    | G |
| 36 | BICF2G630761017         | 21184231 | A | 0.5  | 0.5    | G |
| 36 | BICF2P231369            | 21205207 | 0 | 0    | 0      | A |
| 36 | BICF2P1367378           | 21217184 | 0 | 0    | 0      | G |
| 36 | BICF2S2309349           | 21239039 | G | 0    | 0      | A |
| 36 | BICF2P556373            | 21243089 | 0 | 0    | 0      | G |
| 36 | BICF2S23227691          | 21257051 | G | 0    | 0      | A |
| 36 | BICF2P601109            | 21269968 | 0 | 0    | 0      | G |
| 36 | BICF2P925966            | 21276661 | C | 0.5  | 0.5    | G |
| 36 | G1486f30S210            | 21300588 | 0 | 0    | 0      | G |
| 36 | BICF2P633948            | 21323880 | 0 | 0    | 0      | A |
| 36 | BICF2S2368850           | 21361830 | A | 0    | 0      | G |
| 36 | BICF2G630760989         | 21367295 | G | 0    | 0      | A |
| 36 | BICF2S23763025          | 21383002 | A | 0.5  | 0.5    | G |
| 36 | BICF2S23717196          | 21401435 | A | 0.75 | 0.7857 | G |
| 36 | TIGRP2P412956_rs9125477 | 21403911 | A | 0    | 0      | G |
| 36 | BICF2P1185473           | 21416772 | C | 0.5  | 0.5    | A |
| 36 | BICF2P902483            | 21427112 | A | 0    | 0      | G |
| 36 | BICF2G630760946         | 21437514 | A | 0.25 | 0.2143 | G |
| 36 | BICF2S2308602           | 21459498 | A | 0.25 | 0.2143 | G |
| 36 | BICF2P252455            | 21480568 | A | 0.5  | 0.5    | G |
| 36 | BICF2S2309116           | 21488526 | G | 0.5  | 0.5    | A |
| 36 | BICF2S23454628          | 21494479 | C | 0.5  | 0.5    | A |
| 36 | BICF2P858282            | 21514511 | G | 1    | 1      | A |
| 36 | TIGRP2P412989_rs9125262 | 21518982 | A | 1    | 1      | C |
| 36 | BICF2P873267            | 21522245 | A | 1    | 1      | G |
| 36 | BICF2S23155366          | 21534178 | C | 1    | 1      | A |
| 36 | BICF2G630760936         | 21543185 | G | 1    | 1      | A |
| 36 | BICF2P504505            | 21554580 | 0 | 0    | 0      | A |
| 36 | BICF2P634808            | 21567480 | G | 0.5  | 0.5    | A |
| 36 | BICF2S22916502          | 21576744 | G | 0    | 0      | A |
| 36 | BICF2G630760924         | 21585961 | 0 | 0    | 0      | C |
| 36 | BICF2G630760903         | 21600734 | G | 0.75 | 0.7857 | A |
| 36 | BICF2S22913534          | 21608910 | G | 1    | 1      | A |
| 36 | BICF2G630760866         | 21620586 | A | 1    | 1      | C |
| 36 | TIGRP2P413001_rs9200809 | 21644492 | A | 0    | 0      | G |
| 36 | TIGRP2P413014_rs8563446 | 21660209 | A | 0.75 | 0.7143 | G |
| 36 | BICF2P967559            | 21665914 | A | 0.75 | 0.7143 | G |
| 36 | BICF2P330406            | 21668508 | G | 0    | 0      | A |
| 36 | BICF2G630760848         | 21678030 | A | 0.5  | 0.5    | C |
| 36 | BICF2P1088653           | 21691761 | G | 0    | 0      | A |

|    |                         |          |   |      |        |   |
|----|-------------------------|----------|---|------|--------|---|
| 36 | BICF2S23731694          | 21702287 | A | 0    | 0      | G |
| 36 | BICF2G630760833         | 21712378 | A | 0    | 0      | G |
| 36 | BICF2G630760829         | 21723683 | G | 0    | 0      | A |
| 36 | BICF2G630760815         | 21740295 | A | 0    | 0      | G |
| 36 | BICF2P1119394           | 21747058 | C | 0    | 0      | A |
| 36 | TIGRP2P413061_rs9061967 | 21778346 | 0 | 0    | 0      | A |
| 36 | BICF2G630760738         | 21783146 | C | 0.75 | 0.7857 | G |
| 36 | TIGRP2P413072_rs8920748 | 21800088 | G | 0.25 | 0.2143 | A |
| 36 | BICF2G630760683         | 21829558 | G | 0    | 0      | A |
| 36 | BICF2S23339289          | 21855731 | G | 0.25 | 0.2857 | A |
| 36 | BICF2G630760652         | 21864979 | T | 0.25 | 0.2857 | A |
| 36 | BICF2P343392            | 21865092 | A | 0.25 | 0.2857 | G |
| 36 | TIGRP2P413095_rs8617768 | 21893015 | G | 0    | 0      | A |
| 36 | TIGRP2P413098_rs8820639 | 21901756 | 0 | 0    | 0      | G |
| 36 | BICF2G630760616         | 21912970 | G | 0    | 0      | A |
| 36 | BICF2G630760611         | 21924767 | G | 0    | 0      | A |
| 36 | BICF2G630760609         | 21938510 | A | 0    | 0      | G |
| 36 | BICF2P996777            | 21957782 | G | 0.25 | 0.2857 | A |
| 36 | BICF2G630760603         | 21960123 | A | 0    | 0      | G |
| 36 | BICF2G630760597         | 21971863 | A | 0    | 0      | T |
| 36 | BICF2P1255895           | 21992120 | 0 | 0    | 0      | G |
| 36 | BICF2G630760589         | 22007197 | G | 0    | 0      | A |
| 36 | BICF2G630760584         | 22013922 | A | 0    | 0      | G |
| 36 | BICF2S23035563          | 22025970 | A | 0.5  | 0.5    | G |
| 36 | TIGRP2P413114_rs8695488 | 22037268 | C | 0    | 0      | A |
| 36 | BICF2G630760566         | 22055782 | G | 0.5  | 0.5    | A |
| 36 | BICF2G630760565         | 22062944 | G | 0.5  | 0.5    | A |
| 36 | BICF2G630760564         | 22071845 | 0 | 0    | 0      | A |
| 36 | BICF2G630760563         | 22082596 | A | 1    | 1      | G |
| 36 | BICF2G630760558         | 22092688 | A | 0.25 | 0.2857 | G |
| 36 | BICF2P936625            | 22105511 | A | 0.5  | 0.5    | G |
| 36 | BICF2G630760551         | 22122097 | A | 0.25 | 0.2857 | G |
| 36 | TIGRP2P413125_rs9096534 | 22127269 | G | 0    | 0      | A |
| 36 | BICF2G630760536         | 22148160 | A | 0.25 | 0.2857 | G |
| 36 | BICF2G630760534         | 22156438 | A | 0.25 | 0.2857 | T |
| 36 | BICF2G630760526         | 22163235 | A | 0.25 | 0.2857 | G |
| 36 | BICF2G630760496         | 22179273 | A | 0.25 | 0.2143 | G |
| 36 | BICF2G630760491         | 22184914 | A | 0    | 0      | G |
| 36 | BICF2S23453451          | 22195868 | A | 0.5  | 0.5    | G |
| 36 | BICF2G630760469         | 22207043 | C | 0.25 | 0.2857 | A |
| 36 | TIGRP2P413140_rs9148931 | 22218365 | A | 0.25 | 0.2143 | T |
| 36 | TIGRP2P413152_rs8988485 | 22240064 | A | 0.25 | 0.2143 | G |
| 36 | BICF2G630760438         | 22252211 | A | 0    | 0      | G |
| 36 | BICF2P1267811           | 22259080 | A | 0.25 | 0.2143 | G |
| 36 | TIGRP2P413160_rs9238739 | 22266077 | A | 0.25 | 0.2143 | G |
| 36 | BICF2G630760425         | 22280144 | G | 0.75 | 0.7143 | C |
| 36 | BICF2G630760416         | 22288686 | A | 0.5  | 0.5    | G |

|    |                         |          |   |      |        |   |
|----|-------------------------|----------|---|------|--------|---|
| 36 | TIGRP2P413168_rs8946211 | 22300122 | 0 | 0    | 0      | A |
| 36 | BICF2G630760406         | 22310601 | A | 1    | 0.7143 | G |
| 36 | BICF2G630760394         | 22328627 | G | 0.5  | 0.5    | A |
| 36 | BICF2G630760391         | 22331510 | A | 0.75 | 0.7143 | G |
| 36 | BICF2G630760375         | 22341726 | G | 0.75 | 0.7143 | C |
| 36 | BICF2G630760367         | 22349138 | A | 0.5  | 0.5    | G |
| 36 | BICF2S23323508          | 22356110 | A | 0.5  | 0.5    | G |
| 36 | BICF2P1152313           | 22369005 | A | 0.5  | 0.5    | G |
| 36 | TIGRP2P413177_rs8554232 | 22385580 | 0 | 0    | 0      | G |
| 36 | BICF2P296534            | 22398185 | A | 0.5  | 0.5    | G |
| 36 | BICF2P1295688           | 22400043 | A | 0.5  | 0.5    | G |
| 36 | BICF2S23434634          | 22403378 | G | 0.5  | 0.5    | A |
| 36 | BICF2G630760326         | 22421470 | A | 0.5  | 0.5    | G |
| 36 | BICF2G630760292         | 22434504 | 0 | 0    | 0      | T |
| 36 | BICF2G630760290         | 22444914 | A | 0.5  | 0.5    | G |
| 36 | BICF2G630760267         | 22453447 | A | 0.5  | 0.5    | G |
| 36 | BICF2G630760241         | 22460440 | G | 0.5  | 0.5    | A |
| 36 | BICF2G630760208         | 22472165 | G | 0.5  | 0.5    | A |
| 36 | TIGRP2P413202_rs8902400 | 22484725 | C | 0.75 | 0.7857 | A |
| 36 | BICF2G630760193         | 22495653 | G | 0    | 0      | A |
| 36 | BICF2G630760187         | 22503794 | A | 0    | 0      | G |
| 36 | BICF2G630760182         | 22505532 | G | 0    | 0      | A |
| 36 | BICF2P114562            | 22518503 | 0 | 0    | 0      | G |
| 36 | BICF2S23232725          | 22534595 | A | 1    | 1      | T |
| 36 | BICF2P660638            | 22549351 | A | 0.75 | 0.7143 | G |
| 36 | TIGRP2P413210_rs8970692 | 22552821 | A | 0    | 0      | G |
| 36 | BICF2G630760156         | 22565025 | A | 0.5  | 0.5    | G |
| 36 | BICF2G630760136         | 22582488 | G | 0.25 | 0.2143 | A |
| 36 | BICF2G630760117         | 22592338 | A | 0.25 | 0.2143 | G |
| 36 | BICF2P671969            | 22596028 | G | 0.25 | 0.2857 | A |
| 36 | BICF2S22948804          | 22604996 | A | 0    | 0      | C |
| 36 | TIGRP2P413226_rs8920935 | 22607748 | G | 1    | 0.7143 | A |
| 36 | BICF2G630760087         | 22610692 | G | 0.75 | 0.7143 | A |
| 36 | BICF2G630760075         | 22626357 | A | 0.75 | 0.7143 | G |
| 36 | TIGRP2P413246_rs8962909 | 22650826 | A | 0.25 | 0.2143 | G |
| 36 | BICF2G630760021         | 22661018 | A | 0    | 0      | C |
| 36 | TIGRP2P413254_rs9177516 | 22677223 | 0 | 0    | 0      | C |
| 36 | BICF2G630760005         | 22684883 | A | 0.5  | 0.5    | G |
| 36 | BICF2S23332507          | 22690088 | A | 0.25 | 0.2143 | G |
| 36 | BICF2G630759999         | 22703422 | A | 0    | 0      | G |
| 36 | BICF2P99722             | 22713182 | G | 0.25 | 0.2143 | A |
| 36 | BICF2G630759973         | 22731849 | A | 0.5  | 0.5    | G |
| 36 | BICF2G630759969         | 22735548 | A | 0    | 0      | G |
| 36 | BICF2G630759956         | 22752162 | A | 0    | 0      | G |
| 36 | BICF2G630759937         | 22765247 | G | 0    | 0      | A |
| 36 | BICF2P1096667           | 22785047 | 0 | 0    | 0      | G |
| 36 | BICF2G630759882         | 22795069 | A | 0    | 0      | G |

|    |                         |          |   |      |        |   |
|----|-------------------------|----------|---|------|--------|---|
| 36 | BICF2G630759879         | 22799281 | G | 0    | 0      | A |
| 36 | BICF2G630759850         | 22812622 | A | 1    | 1      | G |
| 36 | BICF2G630759840         | 22817754 | A | 0    | 0      | C |
| 36 | BICF2P453098            | 22830898 | A | 0    | 0      | G |
| 36 | BICF2G630759810         | 22856949 | C | 0.75 | 0.7143 | A |
| 36 | BICF2P567095            | 22866713 | G | 0.75 | 0.7143 | A |
| 36 | TIGRP2P413303_rs8533835 | 22879630 | A | 0    | 0      | G |
| 36 | BICF2G630759794         | 22885221 | A | 0    | 0      | C |
| 36 | TIGRP2P413312_rs9176920 | 22903340 | A | 0.75 | 0.7857 | G |
| 36 | BICF2G630759755         | 22909503 | G | 1    | 1      | C |
| 36 | BICF2P128945            | 22930987 | A | 0.25 | 0.2857 | G |
| 36 | TIGRP2P413315_rs8910416 | 22935867 | C | 1    | 1      | A |
| 36 | BICF2G630759744         | 22952646 | A | 0.75 | 0.7143 | G |
| 36 | BICF2G630759743         | 22955379 | G | 0.75 | 0.7143 | A |
| 36 | BICF2S24313485          | 22973603 | G | 0.5  | 0.5    | A |
| 36 | BICF2P653987            | 22979363 | A | 0    | 0      | G |
| 36 | TIGRP2P413324_rs8743258 | 22997796 | 0 | 0    | 0      | G |
| 36 | BICF2G630759732         | 23013839 | A | 0.75 | 0.7143 | G |
| 36 | BICF2P276096            | 23028382 | 0 | 0    | 0      | A |
| 36 | BICF2G630759716         | 23043947 | A | 0.75 | 0.7857 | G |
| 36 | BICF2G630759714         | 23047059 | A | 0.75 | 0.7857 | G |
| 36 | BICF2G630759698         | 23062005 | A | 0.75 | 0.75   | G |
| 36 | BICF2P598887            | 23069408 | A | 1    | 1      | G |
| 36 | BICF2G630759671         | 23080866 | A | 0.75 | 0.7857 | G |
| 36 | TIGRP2P413346_rs8962524 | 23095167 | T | 0    | 0      | A |
| 36 | TIGRP2P413347_rs8839788 | 23107698 | 0 | 0    | 0      | C |
| 36 | BICF2S2366621           | 23122707 | 0 | 0    | 0      | A |
| 36 | BICF2P1115828           | 23162241 | 0 | 0    | 0      | A |
| 36 | BICF2P290110            | 23175342 | 0 | 0    | 0      | A |
| 36 | BICF2P816302            | 23189112 | 0 | 0    | 0      | G |
| 36 | BICF2P915326            | 23199605 | G | 0.25 | 0.2857 | A |
| 36 | BICF2G630759626         | 23208866 | C | 0    | 0      | A |
| 36 | BICF2G630759606         | 23220249 | G | 0    | 0      | A |
| 36 | BICF2P315549            | 23223152 | G | 0    | 0      | A |
| 36 | BICF2G630759592         | 23233925 | A | 0    | 0      | G |
| 36 | BICF2S23219651          | 23234040 | G | 0.5  | 0.5    | A |
| 36 | BICF2G630759570         | 23252709 | C | 0    | 0      | A |
| 36 | BICF2G630759567         | 23253791 | G | 0    | 0      | A |
| 36 | BICF2G630759546         | 23267330 | G | 0.25 | 0.2857 | A |
| 36 | BICF2G630759525         | 23286089 | G | 1    | 0.7857 | A |
| 36 | BICF2G630759524         | 23287775 | G | 0.75 | 0.7857 | A |
| 36 | BICF2G630759500         | 23300398 | T | 0    | 0      | A |
| 36 | BICF2G630759479         | 23312243 | A | 0    | 0      | C |
| 36 | BICF2G630759441         | 23332128 | C | 0    | 0      | A |
| 36 | BICF2G630759439         | 23333819 | C | 0    | 0      | A |
| 36 | BICF2G630759429         | 23345967 | A | 0    | 0      | G |
| 36 | BICF2G630759412         | 23361502 | A | 0    | 0      | G |

|    |                 |          |   |      |        |   |
|----|-----------------|----------|---|------|--------|---|
| 36 | BICF2G630759408 | 23363202 | A | 0.25 | 0.2143 | G |
| 36 | BICF2G630759392 | 23378442 | A | 0    | 0      | G |
| 36 | BICF2G630759390 | 23383999 | A | 0    | 0      | G |
| 36 | BICF2P962509    | 23397034 | 0 | 0    | 0      | C |
| 36 | BICF2P1291915   | 23398925 | G | 0    | 0      | A |
| 36 | BICF2S23544600  | 23412954 | G | 0.25 | 0.2857 | A |
| 36 | BICF2G630759369 | 23414146 | A | 0    | 0      | C |
| 36 | BICF2G630759365 | 23419079 | A | 0.25 | 0.2143 | G |
| 36 | BICF2S230604    | 23419112 | A | 0.5  | 0.5    | G |
| 36 | BICF2G630759347 | 23427963 | A | 0.25 | 0.2143 | G |
| 36 | BICF2P496057    | 23437572 | T | 0.25 | 0.2857 | A |
| 36 | BICF2S23021426  | 23456857 | A | 0    | 0      | C |
| 36 | BICF2G630759326 | 23462568 | G | 0.5  | 0.5    | A |
| 36 | BICF2S23539332  | 23473988 | A | 0.5  | 0.5    | G |
| 36 | BICF2P894069    | 23487149 | 0 | 0    | 0      | G |
| 36 | BICF2G630759324 | 23500916 | A | 0.75 | 0.7143 | G |
| 36 | BICF2G630759313 | 23507086 | G | 0.5  | 0.5    | A |
| 36 | BICF2G630759299 | 23523319 | A | 0.25 | 0.2857 | G |
| 36 | BICF2G630759297 | 23523542 | A | 0.25 | 0.2857 | G |
| 36 | BICF2G630759293 | 23532350 | A | 0.5  | 0.5    | G |
| 36 | BICF2P1066674   | 23548503 | G | 0    | 0      | A |
| 36 | BICF2P419540    | 23552643 | T | 0    | 0      | A |
| 36 | BICF2P419539    | 23553294 | C | 0    | 0      | A |
| 36 | BICF2P1157039   | 23558183 | A | 0    | 0      | G |
| 36 | BICF2G630759284 | 23565854 | A | 0.5  | 0.5    | C |
| 36 | BICF2P49197     | 23571055 | G | 1    | 1      | A |
| 36 | BICF2G630759267 | 23582641 | A | 0.5  | 0.5    | G |
| 36 | BICF2G630759252 | 23589663 | G | 0.5  | 0.5    | A |
| 36 | BICF2G630759240 | 23605522 | G | 0.5  | 0.5    | A |
| 36 | BICF2G630759237 | 23610914 | A | 0.5  | 0.5    | G |
| 36 | BICF2G630759218 | 23629186 | A | 0.5  | 0.5    | G |
| 36 | BICF2P23436     | 23636623 | G | 0    | 0      | A |
| 36 | BICF2P424574    | 23644970 | A | 0    | 0      | G |
| 36 | BICF2G630759208 | 23657276 | G | 0.5  | 0.5    | A |
| 36 | BICF2G630759183 | 23677709 | G | 0.25 | 0.2857 | A |
| 36 | BICF2G630759181 | 23681911 | G | 0.5  | 0.5    | A |
| 36 | BICF2G630759153 | 23700315 | G | 0.5  | 0.5    | A |
| 36 | BICF2G630759149 | 23702414 | A | 0.5  | 0.5    | C |
| 36 | BICF2G630759144 | 23718123 | A | 0.5  | 0.5    | G |
| 36 | BICF2G630759138 | 23733031 | C | 0.5  | 0.5    | A |
| 36 | BICF2G630759134 | 23739698 | A | 0.5  | 0.5    | G |
| 36 | BICF2G630759128 | 23754516 | A | 0.5  | 0.5    | C |
| 36 | BICF2P426371    | 23764949 | G | 0    | 0      | A |
| 36 | BICF2P760146    | 23769751 | A | 0    | 0      | T |
| 36 | BICF2P150553    | 23784167 | A | 0    | 0      | C |
| 36 | BICF2G630759117 | 23796080 | A | 0.5  | 0.5    | C |
| 36 | BICF2P594452    | 23814723 | A | 0    | 0      | G |

|    |                         |          |   |      |        |   |
|----|-------------------------|----------|---|------|--------|---|
| 36 | BICF2P208497            | 23827332 | 0 | 0    | 0      | C |
| 36 | BICF2P409389            | 23831361 | G | 0.25 | 0.2143 | A |
| 36 | BICF2G630759106         | 23841903 | C | 0.5  | 0.5    | A |
| 36 | BICF2G630759095         | 23852809 | A | 0.5  | 0.5    | G |
| 36 | BICF2G630759072         | 23864413 | A | 0.25 | 0.2857 | G |
| 36 | BICF2G630759068         | 23883476 | G | 0.5  | 0.5    | A |
| 36 | BICF2G630759064         | 23889252 | A | 0.25 | 0.2857 | G |
| 36 | BICF2G630759055         | 23902880 | A | 0    | 0      | G |
| 36 | BICF2G630759043         | 23908693 | A | 0.25 | 0.2857 | G |
| 36 | BICF2G630759022         | 23922404 | G | 0.25 | 0.2857 | A |
| 36 | BICF2G630759007         | 23936304 | T | 0    | 0      | A |
| 36 | BICF2G630759002         | 23946914 | A | 0.25 | 0.2857 | G |
| 36 | BICF2G630758982         | 23957429 | C | 0.25 | 0.2857 | A |
| 36 | BICF2G630758960         | 23970937 | A | 0.25 | 0.2857 | G |
| 36 | BICF2S22960207          | 23982468 | G | 0.25 | 0.2857 | A |
| 36 | BICF2G630758906         | 23994821 | A | 0    | 0.25   | G |
| 36 | BICF2G630758903         | 24011661 | C | 0.25 | 0.2857 | A |
| 36 | BICF2G630758896         | 24019371 | G | 0.25 | 0.2857 | A |
| 36 | BICF2P242018            | 24023065 | G | 1    | 1      | A |
| 36 | BICF2P655638            | 24024782 | A | 0    | 0      | G |
| 36 | BICF2P1256567           | 24042125 | A | 0.25 | 0.2857 | G |
| 36 | BICF2S23636102          | 24047265 | A | 0.25 | 0.2143 | G |
| 36 | BICF2G630758863         | 24060990 | C | 0    | 0      | A |
| 36 | BICF2G630758859         | 24076717 | A | 0    | 0      | G |
| 36 | BICF2G630758855         | 24092420 | A | 0.25 | 0.25   | C |
| 36 | TIGRP2P413367_rs8666189 | 24093066 | 0 | 0    | 0      | A |
| 36 | BICF2G630758823         | 24113601 | A | 0.25 | 0.2857 | G |
| 36 | BICF2G630758815         | 24123487 | A | 0    | 0      | G |
| 36 | BICF2P215346            | 24130301 | 0 | 0    | 0      | A |
| 36 | BICF2G630758787         | 24149504 | A | 0.25 | 0.2857 | G |
| 36 | BICF2P1189942           | 24157477 | G | 0.25 | 0.2857 | A |
| 36 | BICF2P387422            | 24192003 | 0 | 0    | 0      | A |
| 36 | BICF2G630758769         | 24207167 | A | 0    | 0      | G |
| 36 | BICF2P247456            | 24210601 | A | 0.75 | 0.8    | G |
| 36 | BICF2P926599            | 24225229 | A | 0.75 | 0.7143 | C |
| 36 | BICF2P958590            | 24240271 | G | 0    | 0      | A |
| 36 | BICF2P785719            | 24245470 | G | 0.5  | 0.5    | A |
| 36 | BICF2G630758764         | 24253947 | C | 0.25 | 0.2857 | A |
| 36 | BICF2G630758759         | 24272398 | G | 0    | 0      | A |
| 36 | BICF2P966122            | 24284622 | A | 0.75 | 0.75   | G |
| 36 | BICF2G630758754         | 24302797 | C | 0.75 | 0.7857 | A |
| 36 | BICF2G630758740         | 24313885 | G | 0.75 | 0.7857 | A |
| 36 | BICF2G630758719         | 24322783 | G | 0.75 | 0.7857 | A |
| 36 | BICF2P894108            | 24329529 | G | 1    | 1      | A |
| 36 | BICF2G630758704         | 24339733 | G | 0.75 | 0.7857 | C |
| 36 | BICF2S23636213          | 24345881 | A | 0    | 0      | G |
| 36 | BICF2P676628            | 24375759 | A | 0.5  | 0.4286 | C |

|    |                         |          |   |      |        |   |
|----|-------------------------|----------|---|------|--------|---|
| 36 | BICF2P676631            | 24376029 | C | 0.5  | 0.5714 | G |
| 36 | BICF2S23661952          | 24384176 | A | 0.25 | 0.2143 | G |
| 36 | BICF2S23412153          | 24393140 | G | 0.25 | 0.2143 | A |
| 36 | BICF2P1300597           | 24397853 | G | 0.5  | 0.4286 | A |
| 36 | BICF2S23132988          | 24403852 | G | 0.25 | 0.2143 | A |
| 36 | BICF2P562080            | 24416801 | G | 0.25 | 0.2143 | A |
| 36 | BICF2P131830            | 24433598 | 0 | 0    | 0      | C |
| 36 | TIGRP2P413383_rs8951228 | 24468560 | 0 | 0    | 0      | C |
| 36 | BICF2P197135            | 24476500 | G | 0.25 | 0.2143 | A |
| 36 | BICF2P405847            | 24484892 | A | 0    | 0      | C |
| 36 | BICF2P648573            | 24496381 | G | 0    | 0      | A |
| 36 | BICF2P510935            | 24509176 | A | 0.75 | 0.7857 | T |
| 36 | BICF2P776806            | 24513952 | A | 1    | 1      | G |
| 36 | BICF2S2372878           | 24525353 | A | 1    | 1      | C |
| 36 | BICF2P990741            | 24533062 | A | 1    | 1      | G |
| 36 | BICF2P780099            | 24542309 | G | 1    | 1      | A |
| 36 | BICF2P482018            | 24560989 | A | 0.75 | 0.7857 | G |
| 36 | BICF2S23543650          | 24565294 | A | 0.75 | 0.7857 | G |
| 36 | BICF2P147159            | 24577050 | A | 0    | 0      | G |
| 36 | BICF2P305065            | 24596780 | A | 0    | 0      | G |
| 36 | BICF2P588408            | 24607660 | A | 0.75 | 0.7857 | G |
| 36 | BICF2P1434994           | 24629718 | A | 0    | 0      | T |
| 36 | BICF2P1344688           | 24639722 | G | 0.25 | 0.2143 | A |
| 36 | BICF2P436641            | 24659063 | G | 0.25 | 0.2143 | A |
| 36 | BICF2P322442            | 24688177 | A | 0.75 | 0.7857 | G |
| 36 | BICF2P505005            | 24691595 | 0 | 0    | 0      | T |
| 36 | BICF2P1160495           | 24711518 | G | 0.25 | 0.2143 | A |
| 36 | BICF2S23119497          | 24713523 | C | 0.25 | 0.2143 | A |
| 36 | BICF2P1045254           | 24725891 | G | 0.25 | 0.2143 | A |
| 36 | BICF2P111908            | 24736719 | G | 0.75 | 0.7857 | A |
| 36 | BICF2P1402750           | 24755520 | A | 0    | 0      | G |
| 36 | BICF2P1333208           | 24769170 | G | 0    | 0      | A |
| 36 | BICF2G630758697         | 24777894 | G | 0.5  | 0.5    | A |
| 36 | BICF2G630758682         | 24786356 | A | 0.5  | 0.5    | G |
| 36 | BICF2G630758669         | 24798792 | C | 0.5  | 0.5    | A |
| 36 | BICF2G630758654         | 24814140 | T | 0.5  | 0.5    | A |
| 36 | BICF2G630758645         | 24824512 | A | 0.5  | 0.5    | C |
| 36 | BICF2G630758636         | 24831189 | A | 0.5  | 0.5    | G |
| 36 | BICF2G630758629         | 24841741 | A | 1    | 1      | G |
| 36 | BICF2G630758620         | 24852364 | A | 0    | 0      | G |
| 36 | BICF2G630758594         | 24865384 | A | 1    | 1      | G |
| 36 | BICF2P857532            | 24877048 | G | 0    | 0      | A |
| 36 | BICF2G630758573         | 24882350 | A | 0.5  | 0.5    | C |
| 36 | BICF2G630758564         | 24889840 | A | 0    | 0      | G |
| 36 | BICF2G630758543         | 24900140 | G | 0.5  | 0.5    | A |
| 36 | BICF2P1445035           | 24925740 | G | 0.5  | 0.7143 | C |
| 36 | BICF2G630758506         | 24940869 | C | 1    | 0.7857 | A |



|    |                         |          |   |      |        |   |
|----|-------------------------|----------|---|------|--------|---|
| 36 | BICF2G630758469         | 24950734 | A | 0    | 0      | G |
| 36 | BICF2G630758467         | 24958926 | A | 0    | 0      | G |
| 36 | BICF2P267255            | 24970441 | 0 | 0    | 0      | A |
| 36 | BICF2G630758459         | 24979663 | G | 0    | 0.2143 | A |
| 36 | BICF2P1318325           | 24996631 | A | 0.5  | 0.7143 | G |
| 36 | BICF2G630758434         | 25001277 | A | 0.5  | 0.5    | G |
| 36 | BICF2P715051            | 25012533 | A | 0    | 0.2143 | T |
| 36 | BICF2P547551            | 25027605 | G | 1    | 1      | A |
| 36 | BICF2P616728            | 25051678 | 0 | 0    | 0      | A |
| 36 | BICF2P693744            | 25068319 | A | 0.25 | 0.1667 | C |
| 36 | BICF2S2417418           | 25074501 | A | 1    | 1      | G |
| 36 | BICF2G630758420         | 25088107 | A | 0.25 | 0.2143 | G |
| 36 | BICF2G630758399         | 25101300 | A | 0.25 | 0.2143 | G |
| 36 | BICF2G630758390         | 25108286 | A | 0    | 0      | G |
| 36 | BICF2P247895            | 25132320 | A | 0.5  | 0.5    | G |
| 36 | BICF2P27175             | 25149891 | 0 | 0    | 0      | A |
| 36 | BICF2P27176             | 25153508 | A | 0.5  | 0.5    | G |
| 36 | BICF2P222671            | 25169310 | G | 0.75 | 0.7857 | A |
| 36 | TIGRP2P413443_rs9150797 | 25176800 | A | 0.25 | 0.2857 | G |
| 36 | BICF2P506367            | 25191465 | A | 0.75 | 0.7143 | G |
| 36 | BICF2P506366            | 25191819 | A | 0    | 0      | G |
| 36 | BICF2S2357540           | 25202162 | G | 0    | 0      | A |
| 36 | BICF2S22941662          | 25208698 | A | 0.25 | 0.2857 | G |
| 36 | BICF2P1288426           | 25221340 | A | 0    | 0      | G |
| 36 | BICF2P1195431           | 25236684 | G | 0.75 | 0.7143 | A |
| 36 | BICF2P1329941           | 25243343 | 0 | 0    | 0      | G |
| 36 | BICF2S23727786          | 25268477 | A | 0.25 | 0.2857 | G |
| 36 | BICF2P354976            | 25283100 | G | 0.75 | 0.7143 | A |
| 36 | BICF2P851               | 25292102 | G | 0.25 | 0.2857 | A |
| 36 | BICF2P199827            | 25320990 | G | 0    | 0      | A |
| 36 | BICF2P355239            | 25323186 | G | 0.75 | 0.7857 | A |
| 36 | BICF2S2378077           | 25335278 | G | 0.75 | 0.7857 | A |
| 36 | BICF2P1251884           | 25349295 | G | 0.75 | 0.8333 | A |
| 36 | BICF2P459429            | 25360888 | G | 0.75 | 0.7857 | A |
| 36 | BICF2P816829            | 25375016 | A | 0.75 | 0.7857 | G |
| 36 | TIGRP2P413489_rs8886432 | 25384235 | A | 0    | 0      | G |
| 36 | BICF2P188094            | 25390743 | C | 0    | 0      | A |
| 36 | BICF2P536221            | 25401310 | G | 0    | 0      | A |
| 36 | TIGRP2P413491_rs9025571 | 25409407 | G | 0    | 0      | A |
| 36 | BICF2P728258            | 25424275 | A | 0.75 | 0.7143 | G |
| 36 | BICF2P1278400           | 25429345 | A | 0.25 | 0.2143 | G |
| 36 | BICF2P952394            | 25440346 | A | 0    | 0      | G |
| 36 | TIGRP2P413501_rs8890805 | 25460664 | G | 0.25 | 0.1667 | A |
| 36 | TIGRP2P413503_rs8736753 | 25469815 | G | 0    | 0      | A |
| 36 | BICF2S22923758          | 25478827 | A | 0.25 | 0.2143 | G |
| 36 | TIGRP2P413505_rs9186618 | 25491137 | 0 | 0    | 0      | C |
| 36 | TIGRP2P413508_rs8717724 | 25499556 | A | 0    | 0      | C |

|    |                         |          |   |      |        |   |
|----|-------------------------|----------|---|------|--------|---|
| 36 | BICF2P1193662           | 25512991 | C | 0.75 | 0.75   | A |
| 36 | TIGRP2P413513_rs8918369 | 25527098 | A | 0    | 0      | G |
| 36 | BICF2S23221644          | 25534764 | A | 0.75 | 0.7143 | C |
| 36 | BICF2S23056159          | 25543261 | A | 0.25 | 0.2143 | G |
| 36 | TIGRP2P413521_rs9226798 | 25559836 | A | 0.75 | 0.7143 | G |
| 36 | TIGRP2P413528_rs9070494 | 25570562 | G | 0.25 | 0.2857 | A |
| 36 | BICF2P928157            | 25584433 | A | 0    | 0      | G |
| 36 | BICF2P426645            | 25590664 | G | 0.75 | 0.7143 | A |
| 36 | BICF2P125742            | 25599812 | G | 0    | 0      | A |
| 36 | BICF2P584820            | 25611437 | G | 0.75 | 0.7143 | C |
| 36 | BICF2P166922            | 25625240 | G | 0.25 | 0.2857 | A |
| 36 | BICF2S23415533          | 25633744 | A | 0.25 | 0.2857 | G |
| 36 | BICF2P1136860           | 25653776 | C | 0.75 | 0.7143 | A |
| 36 | BICF2S23031216          | 25663925 | 0 | 0    | 0      | A |
| 36 | BICF2P1149130           | 25671906 | A | 0.25 | 0.2857 | G |
| 36 | TIGRP2P413571_rs8649145 | 25681576 | 0 | 0    | 0      | T |
| 36 | BICF2P1505207           | 25702091 | G | 0.75 | 0.7143 | A |
| 36 | BICF2P975448            | 25704983 | A | 0.25 | 0.2857 | G |
| 36 | BICF2P494390            | 25724189 | A | 0.25 | 0.2857 | G |
| 36 | BICF2P496001            | 25736017 | G | 0.25 | 0.2857 | A |
| 36 | TIGRP2P413580_rs8825609 | 25743501 | 0 | 0    | 0      | G |
| 36 | BICF2P1307753           | 25756637 | A | 0.75 | 0.7143 | G |
| 36 | BICF2P683203            | 25760870 | A | 0.25 | 0.2857 | G |
| 36 | BICF2P351283            | 25779307 | A | 0.25 | 0.2857 | C |
| 36 | BICF2P549799            | 25793596 | 0 | 0    | 0      | A |
| 36 | BICF2P793665            | 25795000 | G | 0.25 | 0.2857 | A |
| 36 | BICF2S2325919           | 25813204 | A | 0.25 | 0.2857 | T |
| 36 | BICF2P590756            | 25818116 | 0 | 0    | 0      | C |
| 36 | BICF2P745430            | 25838693 | A | 0    | 0      | C |
| 36 | BICF2P452174            | 25839360 | A | 0.25 | 0.2857 | C |
| 36 | BICF2P452183            | 25841095 | G | 0    | 0      | A |
| 36 | BICF2P1274301           | 25859362 | G | 1    | 0.7857 | A |
| 36 | BICF2P403723            | 25867382 | G | 0    | 0.2143 | A |
| 36 | BICF2P1361802           | 25877812 | A | 0.25 | 0.2857 | G |
| 36 | BICF2P457637            | 25895100 | G | 0.75 | 0.9    | A |
| 36 | BICF2P1366274           | 25901683 | G | 0    | 0      | A |
| 36 | BICF2P1144143           | 25913718 | A | 0    | 0.2143 | G |
| 36 | BICF2S23715595          | 25926242 | T | 0.25 | 0.2857 | A |
| 36 | BICF2S23514782          | 25938837 | C | 0.75 | 0.5    | A |
| 36 | BICF2P1010801           | 25949449 | G | 0    | 0.2143 | A |
| 36 | BICF2P904180            | 25953280 | A | 0    | 0      | C |
| 36 | TIGRP2P413643_rs9034310 | 25958173 | G | 0    | 0      | A |
| 36 | BICF2P676634            | 25968152 | A | 0.25 | 0.2857 | G |
| 36 | TIGRP2P413656_rs8900468 | 25987462 | A | 0    | 0      | G |
| 36 | BICF2P1094115           | 25993707 | G | 0.25 | 0.2857 | A |
| 36 | BICF2P32383             | 26005503 | A | 0    | 0      | C |
| 36 | TIGRP2P413682_rs9128386 | 26016574 | A | 0.25 | 0.2143 | G |

|    |                         |          |   |      |        |   |
|----|-------------------------|----------|---|------|--------|---|
| 36 | BICF2S23623248          | 26027420 | A | 0    | 0      | C |
| 36 | BICF2P22964             | 26041737 | G | 0.25 | 0.2143 | A |
| 36 | BICF2P1064115           | 26056600 | C | 0.25 | 0.2143 | A |
| 36 | BICF2S2311649           | 26067736 | A | 0.25 | 0.2143 | G |
| 36 | BICF2P957136            | 26076543 | A | 0.25 | 0.2143 | G |
| 36 | BICF2P453741            | 26082312 | A | 0.25 | 0.2143 | G |
| 36 | BICF2P79255             | 26105366 | G | 0    | 0      | A |
| 36 | BICF2S2291749           | 26121426 | C | 0    | 0      | A |
| 36 | TIGRP2P413720_rs9125259 | 26128263 | A | 0.25 | 0.2143 | G |
| 36 | BICF2P509719            | 26142125 | G | 0    | 0      | A |
| 36 | BICF2P574720            | 26160871 | G | 1    | 1      | A |
| 36 | BICF2S23056233          | 26164862 | A | 1    | 0.7857 | G |
| 36 | BICF2P645419            | 26175527 | G | 0    | 0      | A |
| 36 | BICF2S23228379          | 26190826 | A | 0    | 0.2143 | G |
| 36 | BICF2S23049533          | 26203775 | A | 0    | 0      | G |
| 36 | BICF2P1260772           | 26209316 | A | 0.75 | 0.5714 | G |
| 36 | TIGRP2P413753_rs8891488 | 26225739 | C | 0.25 | 0.2143 | A |
| 36 | BICF2S2293213           | 26236820 | G | 1    | 1      | A |
| 36 | TIGRP2P413759_rs9078070 | 26245703 | A | 0    | 0      | G |
| 36 | BICF2P620850            | 26255866 | A | 0    | 0      | G |
| 36 | BICF2S23533598          | 26272491 | A | 0    | 0      | G |
| 36 | BICF2P823189            | 26287614 | A | 0    | 0      | G |
| 36 | BICF2P266680            | 26293879 | A | 1    | 0.7857 | T |
| 36 | BICF2S23249171          | 26307179 | G | 0.75 | 0.7857 | A |
| 36 | BICF2S235315            | 26320019 | A | 0    | 0      | G |
| 36 | BICF2P975085            | 26329700 | C | 0.75 | 0.5    | A |
| 36 | BICF2S23029046          | 26335358 | A | 0.75 | 0.5    | G |
| 36 | BICF2S23016416          | 26349872 | A | 0.25 | 0.2143 | G |
| 36 | BICF2S23137915          | 26362178 | A | 0.25 | 0.5    | G |
| 36 | BICF2P125750            | 26373717 | A | 0.75 | 0.5    | C |
| 36 | TIGRP2P413810_rs8909035 | 26388442 | G | 0    | 0      | A |
| 36 | BICF2P55335             | 26398967 | G | 0    | 0.2143 | A |
| 36 | BICF2S23145418          | 26406215 | A | 0    | 0      | G |
| 36 | BICF2P932345            | 26415791 | A | 0    | 0.2143 | G |
| 36 | TIGRP2P413853_rs9140980 | 26429256 | A | 0    | 0.2143 | G |
| 36 | BICF2P1124187           | 26456517 | A | 0    | 0.2143 | G |
| 36 | BICF2P962657            | 26468001 | C | 0    | 0      | A |
| 36 | BICF2P935470            | 26485677 | A | 0.5  | 0.5    | G |
| 36 | TIGRP2P413876_rs8879925 | 26501125 | A | 0    | 0      | C |
| 36 | BICF2P756612            | 26517190 | 0 | 0    | 0      | G |
| 36 | BICF2S2359794           | 26530292 | G | 0.5  | 0.5    | A |
| 36 | BICF2S23533204          | 26538495 | T | 0.25 | 0.2143 | A |
| 36 | BICF2S2376990           | 26543451 | C | 0    | 0      | A |
| 36 | TIGRP2P413882_rs8641354 | 26554980 | A | 0.25 | 0.2857 | G |
| 36 | TIGRP2P413884_rs8544846 | 26566338 | A | 0.25 | 0.2857 | G |
| 36 | BICF2S23414568          | 26584813 | A | 0.5  | 0.5    | G |
| 36 | BICF2P697802            | 26591725 | C | 0    | 0.1    | A |

|    |                         |          |   |      |        |   |
|----|-------------------------|----------|---|------|--------|---|
| 36 | BICF2S23443984          | 26615436 | A | 0.5  | 0.7143 | G |
| 36 | TIGRP2P413891_rs8859672 | 26623520 | A | 0    | 0      | C |
| 36 | BICF2S22957605          | 26637078 | G | 0.75 | 0.5    | A |
| 36 | BICF2P609952            | 26647676 | G | 0.75 | 0.5    | A |
| 36 | TIGRP2P413897_rs9003439 | 26657300 | 0 | 0    | 0      | G |
| 36 | TIGRP2P413903_rs9096533 | 26677350 | A | 0    | 0      | G |
| 36 | BICF2S23012757          | 26686541 | A | 0    | 0.2143 | G |
| 36 | BICF2P1171691           | 26694960 | A | 0    | 0.2143 | T |
| 36 | BICF2P1405973           | 26705612 | G | 0.5  | 0.2857 | A |
| 36 | BICF2P1360623           | 26730139 | A | 0    | 0      | G |
| 36 | BICF2P559968            | 26740164 | A | 0.5  | 0.2857 | G |
| 36 | TIGRP2P413909_rs8647475 | 26758668 | C | 0    | 0.2143 | A |
| 36 | BICF2P477154            | 26761594 | A | 0    | 0      | G |
| 36 | BICF2P296394            | 26771091 | G | 0.5  | 0.2857 | A |
| 36 | BICF2P502700            | 26773032 | A | 0.75 | 0.3571 | G |
| 36 | BICF2S23619177          | 26802865 | A | 0.25 | 0.2857 | G |
| 36 | BICF2P361066            | 26815708 | A | 0.25 | 0.4286 | G |
| 36 | BICF2S23724952          | 26818856 | A | 0.25 | 0.4286 | C |
| 36 | TIGRP2P413940_rs8560064 | 26832438 | 0 | 0    | 0      | A |
| 36 | BICF2P54953             | 26844631 | A | 0    | 0      | G |
| 36 | BICF2P1372507           | 26853690 | G | 0.25 | 0.2857 | A |
| 36 | BICF2P1223434           | 26872714 | A | 0.75 | 0.5    | G |
| 36 | BICF2P181758            | 26877913 | G | 0    | 0      | A |
| 36 | BICF2S23529068          | 26897576 | A | 0.25 | 0.2143 | G |
| 36 | BICF2S23630529          | 26907812 | G | 0.25 | 0.2857 | A |
| 36 | BICF2P789551            | 26913964 | A | 0.5  | 0.5    | G |
| 36 | TIGRP2P413971_rs8769297 | 26928674 | G | 0    | 0.2143 | A |
| 36 | BICF2P1260606           | 26935661 | C | 0.5  | 0.5    | G |
| 36 | BICF2S23410722          | 26940690 | A | 1    | 0.7857 | G |
| 36 | TIGRP2P413989_rs9183950 | 26951766 | A | 0.5  | 0.2857 | G |
| 36 | BICF2P625169            | 26959343 | A | 0.75 | 0.7143 | G |
| 36 | BICF2P350169            | 26967591 | A | 0.5  | 0.2857 | G |
| 36 | BICF2P643341            | 26986091 | G | 0.25 | 0.1667 | A |
| 36 | BICF2P586803            | 26998250 | 0 | 0    | 0      | A |
| 36 | TIGRP2P414025_rs8843468 | 27003802 | C | 0    | 0      | A |
| 36 | BICF2S22958855          | 27010999 | A | 0    | 0.2143 | G |
| 36 | TIGRP2P414028_rs8652680 | 27019345 | A | 0    | 0      | C |
| 36 | BICF2P439846            | 27031842 | G | 0    | 0      | A |
| 36 | TIGRP2P414042_rs8893242 | 27040467 | G | 0.75 | 0.5714 | A |
| 36 | BICF2P785566            | 27058557 | G | 0.5  | 0.5    | A |
| 36 | BICF2P472226            | 27063777 | G | 0    | 0      | A |
| 36 | BICF2S23533674          | 27072187 | A | 0    | 0      | G |
| 36 | BICF2S23161295          | 27087971 | A | 0    | 0.2143 | G |
| 36 | BICF2P620738            | 27096904 | G | 1    | 0.7857 | A |
| 36 | BICF2S23231635          | 27106201 | A | 0    | 0.2143 | C |
| 36 | BICF2P142739            | 27124834 | A | 1    | 0.7857 | G |
| 36 | TIGRP2P414072_rs8568839 | 27130865 | A | 0.25 | 0.4286 | G |

|    |                         |          |   |      |        |   |
|----|-------------------------|----------|---|------|--------|---|
| 36 | TIGRP2P414079_rs8979328 | 27144669 | A | 0.25 | 0.2143 | G |
| 36 | TIGRP2P414082_rs8860828 | 27152561 | A | 0.25 | 0.5    | G |
| 36 | TIGRP2P414093_rs9041986 | 27165749 | G | 0.75 | 0.7143 | A |
| 36 | BICF2S23723153          | 27178274 | G | 0.5  | 0.2857 | A |
| 36 | BICF2P8490              | 27191638 | G | 0    | 0      | A |
| 36 | BICF2P985250            | 27202399 | A | 0    | 0      | G |
| 36 | BICF2P18332             | 27218111 | A | 0    | 0.2143 | G |
| 36 | G1487f43S242            | 27254582 | 0 | 0    | 0      | C |
| 36 | BICF2S23252738          | 27296847 | G | 0    | 0      | A |
| 36 | BICF2P240989            | 27303107 | 0 | 0    | 0      | A |
| 36 | BICF2S23240820          | 27315463 | G | 1    | 1      | A |
| 36 | BICF2P677858            | 27332452 | G | 1    | 1      | A |
| 36 | TIGRP2P414145_rs8728186 | 27337611 | A | 0.25 | 0.4167 | C |
| 36 | BICF2P1138277           | 27358243 | A | 0.75 | 0.7143 | G |
| 36 | BICF2P257989            | 27359533 | C | 0    | 0      | A |
| 36 | BICF2S23763533          | 27371778 | G | 0.75 | 0.7143 | A |
| 36 | BICF2P247151            | 27389902 | C | 0.5  | 0.2857 | G |
| 36 | BICF2P194198            | 27393882 | A | 0.75 | 0.7143 | C |
| 36 | BICF2P220241            | 27408700 | G | 0    | 0      | A |
| 36 | BICF2S2347966           | 27423795 | A | 0.25 | 0.4286 | G |
| 36 | BICF2P1148906           | 27428170 | C | 0.5  | 0.7143 | A |
| 36 | BICF2S23319275          | 27443990 | G | 0.25 | 0.4286 | A |
| 36 | BICF2P684630            | 27453716 | A | 0.5  | 0.7143 | G |
| 36 | BICF2P1339977           | 27463178 | G | 0.5  | 0.5    | A |
| 36 | BICF2S22956434          | 27473715 | A | 0.25 | 0.2143 | G |
| 36 | BICF2P1286121           | 27485932 | C | 0.25 | 0.2857 | A |
| 36 | BICF2P1286099           | 27500291 | G | 0.25 | 0.2857 | A |
| 36 | TIGRP2P414181_rs8967513 | 27511934 | A | 0.5  | 0.5    | C |
| 36 | BICF2P1459051           | 27519513 | G | 0.75 | 0.5714 | A |
| 36 | TIGRP2P414193_rs8569094 | 27534644 | A | 0    | 0.1667 | C |
| 36 | BICF2S23515980          | 27549536 | 0 | 0    | 0      | G |
| 36 | BICF2P822970            | 27558347 | G | 0.75 | 0.5714 | A |
| 36 | TIGRP2P414201_rs9157163 | 27571560 | A | 1    | 0.7857 | T |
| 36 | BICF2P599066            | 27586894 | A | 0.75 | 0.7143 | G |
| 36 | BICF2S23117014          | 27593871 | A | 0    | 0      | G |
| 36 | BICF2P206629            | 27603001 | A | 0    | 0      | G |
| 36 | BICF2P26250             | 27612318 | G | 0.5  | 0.4167 | A |
| 36 | BICF2P716913            | 27624549 | A | 0.75 | 0.7857 | T |
| 36 | BICF2P162491            | 27629027 | G | 0.5  | 0.2857 | A |
| 36 | BICF2P632810            | 27634662 | G | 0    | 0.2143 | A |
| 36 | BICF2P980238            | 27656087 | A | 0    | 0.2143 | T |
| 36 | BICF2P1067879           | 27660883 | A | 1    | 1      | G |
| 36 | BICF2P886043            | 27677280 | A | 0    | 0      | G |
| 36 | TIGRP2P414273_rs9228462 | 27685328 | A | 0    | 0      | G |
| 36 | BICF2P1165414           | 27695445 | A | 0    | 0      | G |
| 36 | BICF2P755924            | 27706611 | G | 0    | 0      | A |
| 36 | TIGRP2P414294_rs8749124 | 27721921 | C | 1    | 0.7857 | A |

|    |                         |          |   |      |        |   |
|----|-------------------------|----------|---|------|--------|---|
| 36 | TIGRP2P414308_rs8870941 | 27735759 | A | 0    | 0      | G |
| 36 | TIGRP2P414313_rs8952189 | 27740507 | A | 0    | 0      | G |
| 36 | TIGRP2P414323_rs8994706 | 27751150 | A | 0    | 0      | C |
| 36 | BICF2P596615            | 27760568 | G | 0    | 0      | A |
| 36 | BICF2P638092            | 27775012 | A | 0    | 0      | G |
| 36 | BICF2P1120784           | 27788402 | G | 0    | 0      | A |
| 36 | BICF2P1120783           | 27788871 | C | 0    | 0      | G |
| 36 | TIGRP2P414358_rs8929031 | 27805561 | A | 0    | 0      | C |
| 36 | BICF2P630233            | 27807141 | A | 1    | 1      | G |
| 36 | BICF2S22924052          | 27822843 | G | 0.25 | 0.2857 | A |
| 36 | BICF2S23453948          | 27831267 | G | 0.25 | 0.2857 | A |
| 36 | BICF2P1164601           | 27844191 | G | 0    | 0      | A |
| 36 | BICF2P1022125           | 27853475 | G | 1    | 1      | A |
| 36 | BICF2P177947            | 27875850 | G | 1    | 1      | A |
| 36 | BICF2P412264            | 27877703 | A | 0    | 0      | G |
| 36 | TIGRP2P414400_rs8721410 | 27891476 | G | 0    | 0      | A |
| 36 | BICF2P302373            | 27907478 | A | 0    | 0.2143 | G |
| 36 | BICF2P1289331           | 27912006 | G | 0    | 0.2143 | A |
| 36 | BICF2P1156106           | 27927423 | G | 1    | 1      | A |
| 36 | BICF2S23521773          | 27935997 | A | 1    | 1      | C |
| 36 | BICF2S23210563          | 27947926 | A | 0.5  | 0.5    | G |
| 36 | BICF2P894720            | 27964646 | A | 0    | 0      | G |
| 36 | BICF2S2378767           | 27975841 | A | 0.5  | 0.5    | G |
| 36 | BICF2P1209354           | 27980744 | G | 0    | 0      | A |
| 36 | BICF2S23754641          | 27997905 | A | 0    | 0      | G |
| 36 | BICF2P1017362           | 28007706 | G | 0    | 0.2143 | A |
| 36 | TIGRP2P414426_rs9135094 | 28017955 | A | 0.5  | 0.5    | T |
| 36 | TIGRP2P414427_rs8573599 | 28026920 | G | 0.5  | 0.5    | A |
| 36 | BICF2P183978            | 28042129 | G | 0    | 0      | A |
| 36 | BICF2S23054679          | 28058380 | A | 0    | 0      | G |
| 36 | TIGRP2P414436_rs8971838 | 28060298 | A | 1    | 0.7857 | T |
| 36 | BICF2S23241270          | 28077134 | A | 0    | 0      | G |
| 36 | BICF2P115231            | 28092419 | G | 0.5  | 0.5    | A |
| 36 | BICF2P1442804           | 28109831 | A | 0    | 0      | G |
| 36 | BICF2P610949            | 28125321 | G | 1    | 0.7857 | A |
| 36 | BICF2P694839            | 28133998 | G | 1    | 0.7857 | A |
| 36 | TIGRP2P414493_rs9158112 | 28142677 | G | 1    | 0.7857 | A |
| 36 | BICF2S23420726          | 28157367 | C | 1    | 0.7857 | A |
| 36 | BICF2P745949            | 28173431 | G | 0.5  | 0.5    | C |
| 36 | TIGRP2P414505_rs8805778 | 28178887 | A | 0.5  | 0.2857 | G |
| 36 | BICF2S23050611          | 28196380 | A | 0.5  | 0.2857 | G |
| 36 | BICF2S2306722           | 28199114 | A | 0    | 0      | G |
| 36 | TIGRP2P414526_rs8667015 | 28210142 | G | 0.5  | 0.7143 | A |
| 36 | TIGRP2P414538_rs8520340 | 28235024 | A | 0    | 0      | G |
| 36 | BICF2P328970            | 28247988 | 0 | 0    | 0      | A |
| 36 | BICF2P1308162           | 28264521 | C | 0    | 0      | A |
| 36 | TIGRP2P414549_rs8782963 | 28269721 | C | 0.5  | 0.2857 | A |

|    |                         |          |   |     |        |   |
|----|-------------------------|----------|---|-----|--------|---|
| 36 | BICF2P25617             | 28281491 | A | 0   | 0      | C |
| 36 | TIGRP2P414564_rs8926121 | 28291789 | G | 0.5 | 0.5    | A |
| 36 | BICF2P1286851           | 28312692 | T | 0.5 | 0.5    | A |
| 36 | BICF2S22934387          | 28316331 | G | 0.5 | 0.7143 | A |
| 36 | BICF2P482643            | 28325419 | A | 0   | 0      | G |
| 36 | BICF2P314325            | 28345986 | G | 0.5 | 0.5    | A |
| 36 | BICF2S2458942           | 28349823 | C | 0.5 | 0.7143 | A |
| 36 | BICF2P1380591           | 28362810 | A | 0.5 | 0.5    | G |
| 36 | BICF2P231550            | 28373103 | A | 0.5 | 0.5    | G |
| 36 | TIGRP2P414608_rs9040955 | 28389013 | A | NA  | 0.5    | C |
| 36 | TIGRP2P414620_rs8835373 | 28400756 | A | 0.5 | 0.7143 | C |
| 36 | BICF2P1038746           | 28413303 | A | 0.5 | 0.5    | G |
| 36 | BICF2S22921115          | 28417174 | G | 0.5 | 0.5    | A |
| 36 | BICF2P1466955           | 28419375 | G | 0.5 | 0.5    | C |
| 36 | BICF2P566290            | 28440789 | A | 0   | 0      | G |
| 36 | BICF2P996202            | 28451473 | A | 0.5 | 0.2857 | G |
| 36 | TIGRP2P414648_rs8711607 | 28472868 | A | 1   | 0.7857 | C |
| 36 | BICF2P1150415           | 28507060 | C | 0   | 0.2143 | A |
| 36 | TIGRP2P414654_rs8702993 | 28510322 | A | 0   | 0.2143 | G |
| 36 | TIGRP2P414661_rs8628201 | 28531226 | G | 0   | 0      | A |
| 36 | BICF2S23355492          | 28536111 | G | 0   | 0      | A |
| 36 | BICF2P281120            | 28558581 | G | 0   | 0      | A |
| 36 | BICF2P1412338           | 28574364 | A | 0   | 0      | T |
| 36 | BICF2P339509            | 28590156 | A | 0   | 0      | C |
| 36 | BICF2P824067            | 28600562 | A | 0   | 0      | G |
| 36 | BICF2P280881            | 28622504 | G | 0.5 | 0.5    | A |
| 36 | BICF2P222733            | 28626125 | A | 0.5 | 0.5    | G |
| 36 | BICF2P1328343           | 28640515 | A | 0.5 | 0.5    | G |
| 36 | BICF2P1000732           | 28650649 | A | 0.5 | 0.5    | G |
| 36 | BICF2P499682            | 28666231 | A | 0.5 | 0.5    | C |
| 36 | BICF2S23228234          | 28678080 | C | 0   | 0      | A |
| 36 | BICF2P995710            | 28683158 | A | 0   | 0      | G |
| 36 | BICF2S23010714          | 28701930 | G | 0   | 0      | A |
| 36 | BICF2P1139117           | 28704701 | G | 0.5 | 0.2857 | A |
| 36 | BICF2P1384166           | 28734211 | A | 0   | 0.2143 | G |
| 36 | BICF2P994601            | 28740029 | G | 0   | 0.2143 | A |
| 36 | BICF2P701468            | 28756132 | A | 0.5 | 0.5    | G |
| 36 | BICF2P63174             | 28766558 | O | 0   | 0      | A |
| 36 | BICF2P220533            | 28775559 | A | 0   | 0      | G |
| 36 | BICF2P969224            | 28787928 | A | 0   | 0.2143 | G |
| 36 | BICF2P650914            | 28804554 | G | 0.5 | 0.5    | A |
| 36 | TIGRP2P414677_rs8637079 | 28811902 | A | 0.5 | 0.5    | C |
| 36 | BICF2S23053601          | 28819640 | G | 0.5 | 0.5    | A |
| 36 | BICF2P593151            | 28839816 | G | 0.5 | 0.5    | A |
| 36 | BICF2S23521356          | 28844593 | T | 0.5 | 0.2857 | A |
| 36 | BICF2P829480            | 28857935 | O | 0   | 0      | A |
| 36 | BICF2S23129887          | 28865143 | G | 0.5 | 0.5    | A |

|    |                         |          |   |      |        |   |
|----|-------------------------|----------|---|------|--------|---|
| 36 | BICF2P933554            | 28893669 | G | 0.5  | 0.5    | A |
| 36 | BICF2S23322746          | 28907440 | C | 0.5  | 0.7143 | A |
| 36 | BICF2P677737            | 28913592 | A | 0    | 0      | G |
| 36 | BICF2P1202421           | 28924262 | G | 0.25 | 0.2143 | C |
| 36 | BICF2P725852            | 28925027 | A | 0    | 0      | G |
| 36 | BICF2P1407188           | 28942428 | A | 0    | 0.2143 | G |
| 36 | BICF2S23753199          | 28954773 | G | 0.25 | 0.4286 | A |
| 36 | BICF2P515897            | 28961516 | A | 0.25 | 0.4286 | G |
| 36 | BICF2S23038776          | 28970225 | C | 0    | 0      | A |
| 36 | BICF2S23731104          | 28983799 | G | 0.75 | 0.5714 | A |
| 36 | BICF2P418757            | 28997576 | A | 0    | 0      | G |
| 36 | BICF2P891931            | 29015835 | A | 1    | 0.7857 | G |
| 36 | BICF2P1015931           | 29048089 | A | 0.75 | 0.5714 | G |
| 36 | BICF2P832913            | 29056894 | A | 0.75 | 0.5714 | G |
| 36 | BICF2P78176             | 29066937 | G | 0.75 | 0.5714 | A |
| 36 | BICF2P1230289           | 29075340 | G | 0.75 | 0.5714 | A |
| 36 | BICF2P423036            | 29086910 | G | 1    | 0.7857 | A |
| 36 | BICF2G630758360         | 29105014 | C | 0    | 0      | A |
| 36 | BICF2G630758356         | 29108664 | G | 0.25 | 0.2143 | A |
| 36 | BICF2G630758354         | 29119226 | A | 0    | 0      | C |
| 36 | BICF2G630758346         | 29132526 | A | 0.25 | 0.2143 | G |
| 36 | TIGRP2P414801_rs9066736 | 29143061 | A | 0    | 0      | G |
| 36 | BICF2G630758335         | 29160522 | C | 0    | 0      | A |
| 36 | BICF2G630758332         | 29166004 | A | 0    | 0      | C |
| 36 | TIGRP2P414806_rs8653951 | 29175596 | 0 | 0    | 0      | C |
| 36 | BICF2G630758321         | 29194453 | A | 0    | 0      | G |
| 36 | BICF2G630758316         | 29208006 | G | 0    | 0      | A |
| 36 | BICF2G630758305         | 29213130 | A | 0.25 | 0.4286 | T |
| 36 | BICF2G630758293         | 29223556 | A | 0.75 | 0.5714 | G |
| 36 | BICF2G630758280         | 29234303 | A | 0.25 | 0.4286 | G |
| 36 | BICF2G630758265         | 29246033 | C | 0.75 | 0.5714 | G |
| 36 | BICF2G630758240         | 29259038 | A | 0.25 | 0.2857 | G |
| 36 | BICF2G630758235         | 29262269 | G | 0.25 | 0.2857 | A |
| 36 | TIGRP2P414815_rs9118616 | 29269324 | A | NA   | 0      | G |
| 36 | BICF2P501087            | 29287634 | A | 0    | 0      | C |
| 36 | BICF2G630758184         | 29293644 | A | 0.25 | 0.2857 | G |
| 36 | BICF2P292126            | 29304090 | G | 0.25 | 0.2143 | A |
| 36 | BICF2G630758123         | 29324192 | A | 0    | 0      | G |
| 36 | BICF2G630758116         | 29327148 | A | 0.25 | 0.2857 | C |
| 36 | TIGRP2P414823_rs8658697 | 29337033 | G | 0    | 0      | A |
| 36 | BICF2P1073468           | 29348700 | A | 0.75 | 0.75   | G |
| 36 | TIGRP2P414827_rs8512435 | 29368316 | A | 0    | 0      | G |
| 36 | TIGRP2P414828_rs8861814 | 29372205 | G | 0    | 0      | A |
| 36 | BICF2S23030747          | 29387754 | G | 0    | 0      | A |
| 36 | TIGRP2P414846_rs9026567 | 29394275 | A | 0    | 0      | C |
| 36 | BICF2S23414597          | 29412259 | A | 0    | 0      | G |
| 36 | BICF2P1071368           | 29437908 | A | 0    | 0      | G |



|    |                         |          |   |      |        |   |
|----|-------------------------|----------|---|------|--------|---|
| 36 | TIGRP2P414856_rs8565009 | 29445186 | G | 0.25 | 0.2857 | A |
| 36 | BICF2S2335695           | 29452954 | A | 0.5  | 0.5    | C |
| 36 | BICF2P61697             | 29464884 | G | 0.75 | 0.7857 | A |
| 36 | BICF2P1379415           | 29478088 | G | 0    | 0      | A |
| 36 | TIGRP2P414870_rs9045596 | 29493797 | G | 0.25 | 0.2143 | A |
| 36 | BICF2P1276041           | 29498868 | A | 0    | 0      | G |
| 36 | BICF2S23052635          | 29511168 | A | 0    | 0      | G |
| 36 | TIGRP2P414879_rs9150516 | 29511734 | G | 0.75 | 0.7857 | A |
| 36 | BICF2S23758106          | 29530590 | A | 0    | 0      | G |
| 36 | BICF2S23140650          | 29534544 | A | 0    | 0      | C |
| 36 | BICF2S22944651          | 29549762 | C | 0.75 | 0.7857 | A |
| 36 | BICF2G630758065         | 29557084 | G | 0    | 0      | A |
| 36 | BICF2G630758053         | 29560938 | A | 0.25 | 0.2857 | G |
| 36 | BICF2P283104            | 29576829 | T | 0.75 | 0.7857 | A |
| 36 | TIGRP2P414898_rs8936425 | 29578638 | G | 1    | 1      | A |
| 36 | BICF2G630758005         | 29596353 | G | 0.5  | 0.5    | A |
| 36 | BICF2G630757990         | 29608881 | A | 0.75 | 0.7857 | G |
| 36 | BICF2G630757971         | 29616088 | C | 0    | 0      | A |
| 36 | BICF2P1151690           | 29628516 | A | 0.5  | 0.5    | G |
| 36 | BICF2S2376338           | 29637803 | A | 0    | 0      | G |
| 36 | BICF2P92014             | 29651125 | G | 0.5  | 0.5    | A |
| 36 | BICF2G630757911         | 29663409 | A | 0.25 | 0.2857 | G |
| 36 | BICF2G630757891         | 29673565 | A | 0.25 | 0.2143 | G |
| 36 | BICF2G630757856         | 29690403 | G | 0.25 | 0.2857 | A |
| 36 | BICF2G630757848         | 29693814 | A | 0    | 0      | G |
| 36 | TIGRP2P414923_rs9170313 | 29709276 | A | 0.25 | 0.2857 | G |
| 36 | BICF2G630757805         | 29716454 | 0 | 0    | 0      | G |
| 36 | BICF2G630757793         | 29729449 | A | 0    | 0      | G |
| 36 | BICF2P851802            | 29743315 | C | 0.25 | 0.2143 | G |
| 36 | BICF2G630757782         | 29756417 | 0 | 0    | 0      | G |
| 36 | TIGRP2P414957_rs8523367 | 29762966 | A | 0    | 0      | G |
| 36 | BICF2P317223            | 29775602 | G | 0.75 | 0.7857 | A |
| 36 | BICF2G630757772         | 29793370 | A | 0.25 | 0.2143 | G |
| 36 | BICF2G630757765         | 29801878 | A | 0.75 | 0.7143 | G |
| 36 | BICF2G630757759         | 29811158 | G | 0.75 | 0.7143 | A |
| 36 | BICF2G630757744         | 29819958 | A | 0    | 0      | G |
| 36 | BICF2G630757694         | 29839856 | C | 0.5  | 0.5    | A |
| 36 | BICF2G630757693         | 29840039 | 0 | 0    | 0      | C |
| 36 | BICF2P698047            | 29844098 | A | 0.5  | 0.5    | G |
| 36 | BICF2P888360            | 29865343 | A | 0.25 | 0.2857 | G |
| 36 | TIGRP2P414980_rs9081103 | 29867923 | A | 0.25 | 0.2143 | G |
| 36 | BICF2S22964063          | 29886785 | A | 0.5  | 0.5    | C |
| 36 | BICF2G630757682         | 29893947 | C | 0.75 | 0.8333 | A |
| 36 | BICF2G630757678         | 29902163 | A | 0.25 | 0.2143 | C |
| 36 | BICF2S23750807          | 29913520 | G | 0.25 | 0.2143 | A |
| 36 | BICF2G630757671         | 29929584 | 0 | 0    | 0      | G |
| 36 | TIGRP2P414992_rs8450895 | 29943372 | 0 | 0    | 0      | A |

|    |                         |          |   |      |        |   |
|----|-------------------------|----------|---|------|--------|---|
| 36 | BICF2S23653724          | 29948386 | A | 0.25 | 0.2857 | G |
| 36 | BICF2G630757645         | 29954909 | A | 0    | 0      | G |
| 36 | BICF2G630757618         | 29965091 | G | 0    | 0      | A |
| 36 | BICF2G630757597         | 29971321 | C | 0    | 0      | G |
| 36 | BICF2G630757563         | 29985636 | 0 | 0    | 0      | G |
| 36 | BICF2G630757542         | 29999066 | A | 0    | 0      | G |
| 36 | BICF2G630757530         | 30010852 | A | 0    | 0      | G |
| 36 | BICF2G630757519         | 30018698 | A | 0    | 0      | G |
| 36 | BICF2G630757476         | 30037420 | 0 | 0    | 0      | A |
| 36 | BICF2P1024302           | 30040429 | G | 0    | 0      | A |
| 36 | TIGRP2P415015_rs8538209 | 30050392 | A | 0.25 | 0.2857 | G |
| 36 | BICF2S23437300          | 30061906 | A | 0    | 0      | G |
| 36 | BICF2G630757401         | 30076588 | G | 0    | 0      | A |
| 36 | BICF2G630757380         | 30085526 | A | 0.5  | 0.5    | G |
| 36 | BICF2G630757374         | 30106803 | C | 0    | 0      | A |
| 36 | BICF2G630757361         | 30112933 | A | 0.5  | 0.5    | G |
| 36 | BICF2G630757352         | 30129884 | G | 0.5  | 0.5    | A |
| 36 | BICF2G630757351         | 30130151 | A | 0.5  | 0.5    | G |
| 36 | BICF2G630757340         | 30133961 | G | 1    | 1      | A |
| 36 | BICF2S2348959           | 30147716 | A | 0.5  | 0.5    | G |
| 36 | BICF2G630757324         | 30167892 | A | 1    | 1      | C |
| 36 | BICF2G630757309         | 30185656 | G | 0    | 0      | A |
| 36 | BICF2P1506630           | 30191218 | A | 0.25 | 0.2143 | G |
| 36 | BICF2G630757286         | 30199309 | G | 0.5  | 0.5    | A |
| 36 | BICF2G630757281         | 30210510 | A | 0.75 | 0.75   | G |
| 36 | BICF2G630757269         | 30223916 | G | 0    | 0      | A |
| 36 | BICF2G630757239         | 30239747 | A | 0.75 | 0.7143 | G |
| 36 | BICF2G630757221         | 30245809 | G | 0    | 0      | A |
| 36 | BICF2G630757200         | 30258087 | A | 0.25 | 0.2143 | G |
| 36 | BICF2G630757182         | 30263753 | G | 0    | 0      | A |
| 36 | BICF2P199581            | 30268495 | G | 0.25 | 0.2857 | A |
| 36 | TIGRP2P415057_rs8919290 | 30295803 | G | 0.25 | 0.2143 | A |
| 36 | BICF2G630757129         | 30305386 | A | 0    | 0      | G |
| 36 | BICF2G630757124         | 30317153 | G | 0.25 | 0.2143 | A |
| 36 | BICF2G630757117         | 30325539 | A | 1    | 1      | G |
| 36 | BICF2G630757102         | 30339071 | A | 0    | 0      | G |
| 36 | TIGRP2P415076_rs8556254 | 30350837 | A | 0    | 0      | G |
| 36 | BICF2G630757064         | 30363051 | A | 0.25 | 0.2143 | G |
| 36 | BICF2P987764            | 30393934 | A | 0.25 | 0.2143 | G |
| 36 | BICF2G630757031         | 30397039 | A | 0    | 0      | G |
| 36 | TIGRP2P415096_rs8690639 | 30413932 | G | 0    | 0      | A |
| 36 | BICF2P158211            | 30418832 | 0 | 0    | 0      | A |
| 36 | BICF2G630757008         | 30432272 | A | 0    | 0      | G |
| 36 | BICF2G630756994         | 30441260 | A | 0    | 0      | G |
| 36 | TIGRP2P415103_rs8869999 | 30454943 | A | 0.25 | 0.2143 | C |
| 36 | TIGRP2P415116_rs8745554 | 30465951 | 0 | 0    | 0      | A |
| 36 | BICF2G630756991         | 30495170 | A | 0.5  | 0.5    | G |

|    |                         |          |   |      |        |   |
|----|-------------------------|----------|---|------|--------|---|
| 36 | BICF2G630756983         | 30509142 | G | 0    | 0      | A |
| 36 | BICF2G630756981         | 30510451 | A | 0.25 | 0.2857 | G |
| 36 | BICF2P1266781           | 30521017 | 0 | 0    | 0      | G |
| 36 | BICF2G630756925         | 30535535 | C | 0    | 0      | A |
| 36 | BICF2G630756908         | 30547537 | G | 0    | 0      | A |
| 36 | BICF2G630756876         | 30565287 | G | 0.5  | 0.5    | A |
| 36 | BICF2G630756871         | 30567180 | G | 0.5  | 0.5    | A |
| 36 | BICF2G630756841         | 30579800 | G | 0.25 | 0.2857 | A |
| 36 | BICF2G630756826         | 30593796 | A | 0    | 0      | G |
| 36 | BICF2G630756791         | 30606456 | A | 0.5  | 0.5    | G |
| 36 | BICF2G630756780         | 30613161 | A | 0    | 0.25   | C |
| 36 | BICF2G630756764         | 30625360 | G | 0    | 0      | A |
| 36 | BICF2G630756741         | 30637526 | G | 0    | 0      | A |
| 36 | TIGRP2P415177_rs8991618 | 30653141 | G | 0.25 | 0.2857 | A |
| 36 | BICF2P459425            | 30665052 | G | 0.25 | 0.2857 | A |
| 36 | BICF2P807253            | 30676324 | G | 0.75 | 0.7857 | A |
| 36 | BICF2P640443            | 30684384 | A | 0.25 | 0.2857 | C |
| 36 | BICF2G630756718         | 30704432 | A | 0.5  | 0.5    | G |
| 36 | BICF2G630756714         | 30706004 | G | 0    | 0      | A |
| 36 | BICF2G630756684         | 30721339 | A | 0    | 0      | G |
| 36 | BICF2G630756663         | 30729773 | G | 0    | 0      | A |
| 36 | BICF2G630756645         | 30745075 | 0 | 0    | 0      | A |
| 36 | BICF2S23524964          | 30762428 | G | 0.25 | 0.2143 | A |
| 36 | BICF2G630756631         | 30766310 | A | 0.75 | 0.7857 | G |
| 36 | TIGRP2P415219_rs8491182 | 30775808 | G | 0.5  | 0.5    | A |
| 36 | BICF2S23337505          | 30787485 | A | 0    | 0      | G |
| 36 | BICF2G630756576         | 30818239 | A | 0    | 0      | G |
| 36 | BICF2G630756575         | 30818266 | G | 0    | 0      | A |
| 36 | BICF2G630756572         | 30821256 | G | 0    | 0      | A |
| 36 | BICF2G630756554         | 30834917 | G | 0    | 0      | A |
| 36 | BICF2G630756528         | 30849588 | A | 0    | 0      | G |
| 36 | BICF2P602461            | 30861888 | A | 0.25 | 0.2143 | G |
| 36 | BICF2G630756520         | 30866014 | G | 0    | 0      | A |
| 36 | BICF2P233757            | 30880021 | A | 0.25 | 0.2857 | G |
| 36 | BICF2P180508            | 30913262 | A | 0.25 | 0.2857 | G |
| 36 | BICF2G630756431         | 30932583 | G | 0.5  | 0.5    | A |
| 36 | BICF2G630756429         | 30937852 | A | 1    | 1      | G |
| 36 | BICF2G630756415         | 30947302 | G | 0.5  | 0.5    | A |
| 36 | BICF2G630756392         | 30966425 | A | 0    | 0      | G |
| 36 | BICF2G630756387         | 30971276 | A | 0    | 0      | G |
| 36 | BICF2G630756369         | 30983070 | A | 0    | 0      | G |
| 36 | BICF2G630756348         | 30998901 | G | 0.25 | 0.2857 | A |
| 36 | BICF2P387730            | 31013948 | A | 0.5  | 0.5    | G |
| 36 | BICF2P1445758           | 31027921 | G | 0.5  | 0.5    | A |
| 36 | BICF2G630756285         | 31039259 | A | 0.75 | 0.7143 | C |
| 36 | BICF2S23310803          | 31056834 | G | 0.25 | 0.2143 | A |
| 36 | BICF2G630756261         | 31082731 | A | 0    | 0      | G |

|    |                         |          |   |      |        |   |
|----|-------------------------|----------|---|------|--------|---|
| 36 | BICF2P986700            | 31095085 | 0 | 0    | 0      | A |
| 36 | BICF2S2349729           | 31100406 | A | 0.5  | 0.5    | G |
| 36 | BICF2P854515            | 31108926 | 0 | 0    | 0      | A |
| 36 | BICF2P831555            | 31129084 | G | 0    | 0      | A |
| 36 | BICF2S22950054          | 31141202 | A | 0    | 0      | C |
| 36 | BICF2G630756239         | 31154013 | G | 0    | 0      | A |
| 36 | BICF2G630756211         | 31175618 | G | 0.5  | 0.5    | A |
| 36 | BICF2G630756201         | 31184853 | A | 0    | 0      | G |
| 36 | BICF2G630756197         | 31192170 | G | 0    | 0      | A |
| 36 | BICF2G630756190         | 31202159 | G | 0    | 0      | A |
| 36 | BICF2G630756165         | 31216101 | G | 0    | 0      | A |
| 36 | BICF2G630756152         | 31222892 | G | 0    | 0      | A |
| 36 | BICF2P1189680           | 31235213 | A | 0    | 0      | G |
| 36 | BICF2G630756129         | 31266304 | G | 0    | 0      | A |
| 36 | BICF2G630756126         | 31269931 | G | 0    | 0      | A |
| 36 | BICF2S22957006          | 31281341 | G | 0    | 0      | A |
| 36 | BICF2G630756114         | 31297321 | A | 1    | 1      | G |
| 36 | BICF2G630756108         | 31313893 | G | 0    | 0      | A |
| 36 | BICF2P775827            | 31320383 | A | 0    | 0      | G |
| 36 | BICF2S23441903          | 31330973 | 0 | 0    | 0      | G |
| 36 | BICF2P607886            | 31338524 | C | 1    | 1      | A |
| 36 | BICF2G630756059         | 31354684 | C | 0.75 | 0.7143 | A |
| 36 | BICF2S23540933          | 31369432 | A | 0.75 | 0.7143 | G |
| 36 | BICF2S23735623          | 31382876 | A | 0.75 | 0.7143 | G |
| 36 | BICF2G630756038         | 31384295 | 0 | 0    | 0      | A |
| 36 | BICF2G630756012         | 31401106 | A | 0.75 | 0.7143 | G |
| 36 | BICF2G630755988         | 31417601 | A | NA   | NA     | G |
| 36 | BICF2G630755982         | 31431827 | A | 0.25 | 0.2857 | G |
| 36 | BICF2G630755963         | 31446089 | C | 0    | 0      | G |
| 36 | BICF2P1095112           | 31449254 | A | 0    | 0      | C |
| 36 | BICF2G630755955         | 31456697 | G | 0    | 0      | A |
| 36 | BICF2G630755940         | 31467314 | A | 0    | 0      | C |
| 36 | BICF2G630755916         | 31478941 | G | 0.25 | 0.2857 | A |
| 36 | BICF2G630755879         | 31496755 | A | 0.75 | 0.7143 | G |
| 36 | BICF2G630755868         | 31502904 | 0 | 0    | 0      | A |
| 36 | BICF2G630755855         | 31514752 | A | 0.25 | 0.2857 | G |
| 36 | BICF2G630755846         | 31526202 | G | 0.25 | 0.2857 | A |
| 36 | BICF2G630755834         | 31535093 | A | 0    | 0      | C |
| 36 | BICF2S2337117           | 31544873 | A | 0.25 | 0.2857 | C |
| 36 | BICF2G630755819         | 31556972 | A | 0    | 0      | G |
| 36 | BICF2G630755783         | 31570105 | A | 0.75 | 0.7143 | C |
| 36 | BICF2P923039            | 31587233 | A | 0.25 | 0.2857 | G |
| 36 | BICF2G630755740         | 31591831 | A | 1    | 1      | G |
| 36 | TIGRP2P415397_rs8629542 | 31603582 | A | 0.25 | 0.2857 | C |
| 36 | BICF2P1194573           | 31614595 | C | 0    | 0      | A |
| 36 | BICF2S2317048           | 31631625 | A | 0    | 0      | G |
| 36 | BICF2G630755702         | 31635087 | C | 1    | 1      | A |

|    |                         |          |   |      |        |   |
|----|-------------------------|----------|---|------|--------|---|
| 36 | BICF2G630755701         | 31636554 | A | 0    | 0      | G |
| 36 | BICF2S2307638           | 31658855 | A | 0.75 | 0.7143 | T |
| 36 | BICF2S23431464          | 31660112 | G | 1    | 1      | A |
| 36 | BICF2G630755626         | 31671066 | G | 0.25 | 0.2857 | A |
| 36 | BICF2G630755595         | 31686228 | A | 1    | 1      | G |
| 36 | BICF2G630755594         | 31686247 | G | 1    | 1      | A |
| 36 | BICF2P766538            | 31689604 | A | 0    | 0      | G |
| 36 | BICF2P377860            | 31701979 | A | 0.75 | 0.7143 | C |
| 36 | BICF2G630755575         | 31707756 | A | 0.75 | 0.7143 | C |
| 36 | BICF2G630755559         | 31717409 | A | 0    | 0      | G |
| 36 | BICF2S244782            | 31728821 | G | 0.75 | 0.7143 | A |
| 36 | BICF2P521422            | 31748636 | A | 0    | 0.2857 | G |
| 36 | BICF2P1133661           | 31757724 | G | 0    | 0      | A |
| 36 | BICF2P827133            | 31774557 | C | 0    | 0      | A |
| 36 | BICF2P366174            | 31788359 | 0 | 0    | 0      | A |
| 36 | BICF2S23334654          | 31799684 | A | 0.25 | 0.2857 | G |
| 36 | BICF2G630755516         | 31811888 | 0 | 0    | 0      | A |
| 36 | BICF2P114406            | 31820726 | G | 0.25 | 0.2857 | C |
| 36 | TIGRP2P415481_rs9023351 | 31832089 | G | 0.25 | 0.2857 | A |
| 36 | BICF2G630755496         | 31844839 | A | 0.75 | 0.7143 | G |
| 36 | BICF2G630755472         | 31856058 | A | 0.75 | 0.7143 | C |
| 36 | BICF2G630755457         | 31867633 | C | 1    | 1      | A |
| 36 | BICF2G630755431         | 31878410 | A | 0.75 | 0.7143 | G |
| 36 | BICF2G630755392         | 31892859 | G | 1    | 1      | A |
| 36 | BICF2G630755365         | 31901758 | A | 0.75 | 0.7143 | G |
| 36 | BICF2G630755347         | 31915904 | G | 0.75 | 0.7143 | A |
| 36 | BICF2P561919            | 31930523 | A | 1    | 1      | G |
| 36 | BICF2G630755307         | 31943026 | G | 1    | 1      | A |
| 36 | BICF2G630755287         | 31950080 | 0 | 0    | 0      | G |
| 36 | BICF2S22933312          | 31960008 | G | 0    | 0      | A |
| 36 | BICF2G630755228         | 31972269 | C | 0.25 | 0.2857 | A |
| 36 | BICF2G630755207         | 31987407 | A | 0    | 0      | G |
| 36 | BICF2S23121625          | 32003302 | A | 0    | 0      | C |
| 36 | BICF2G630755182         | 32004598 | A | 0    | 0      | G |
| 36 | BICF2G630755151         | 32017643 | A | 1    | 1      | G |
| 36 | BICF2G630755136         | 32035011 | G | 0.75 | 0.7143 | A |
| 36 | BICF2G630755121         | 32042110 | G | 0.75 | 0.7143 | A |
| 36 | BICF2G630755114         | 32053790 | A | 1    | 0.75   | C |
| 36 | TIGRP2P415617_rs8932884 | 32062519 | A | 0.75 | 0.7143 | G |
| 36 | BICF2P684540            | 32074633 | A | 0.25 | 0.2857 | G |
| 36 | BICF2G630755083         | 32086112 | A | 0.25 | 0.4286 | G |
| 36 | BICF2G630755072         | 32107658 | A | 0.25 | 0.4286 | C |
| 36 | TIGRP2P415632_rs8653689 | 32118113 | G | 0.25 | 0.2857 | A |
| 36 | BICF2G630755037         | 32124405 | A | 0    | 0.4    | G |
| 36 | BICF2G630755022         | 32142355 | G | 0.25 | 0.4286 | A |
| 36 | BICF2G630755019         | 32146889 | A | 1    | 1      | C |
| 36 | BICF2P736841            | 32154112 | G | 0.5  | 0.2857 | A |

|    |                         |          |   |     |        |   |
|----|-------------------------|----------|---|-----|--------|---|
| 36 | BICF2P1143294           | 32165785 | G | 0.5 | 0.2857 | A |
| 36 | BICF2G630754984         | 32182229 | A | 0   | 0      | C |
| 36 | TIGRP2P415644_rs8578825 | 32196035 | A | 0.5 | 0.2857 | G |
| 36 | BICF2G630754950         | 32200380 | C | 0   | 0.2143 | A |
| 36 | BICF2G630754933         | 32214340 | A | 0   | 0      | G |
| 36 | BICF2P766833            | 32223152 | C | 0   | 0      | A |
| 36 | BICF2G630754888         | 32241787 | C | 1   | 1      | A |
| 36 | BICF2G630754880         | 32248929 | A | 0   | 0      | G |
| 36 | BICF2P528964            | 32260025 | A | 0.5 | 0.7143 | G |
| 36 | BICF2G630754857         | 32273213 | G | 0   | 0      | A |
| 36 | BICF2S2373491           | 32283414 | A | 0   | 0      | G |
| 36 | BICF2G630754801         | 32301558 | A | 0.5 | 0.2857 | T |
| 36 | BICF2G630754794         | 32307077 | G | 0.5 | 0.5    | A |
| 36 | BICF2G630754778         | 32320356 | A | 0.5 | 0.7143 | G |
| 36 | BICF2S23444479          | 32327366 | G | 0   | 0.2143 | A |
| 36 | BICF2P494494            | 32346254 | A | 0.5 | 0.5    | G |
| 36 | BICF2G630754754         | 32358152 | A | 0   | 0      | C |
| 36 | BICF2G630754733         | 32364306 | G | 0.5 | 0.2857 | A |
| 36 | BICF2G630754715         | 32381722 | G | 1   | 0.7857 | A |
| 36 | BICF2P785622            | 32386724 | A | 0.5 | 0.5    | C |
| 36 | BICF2P1276829           | 32396017 | A | 0.5 | 0.2857 | G |
| 36 | BICF2G630754698         | 32396238 | G | 1   | 0.7857 | A |
| 36 | TIGRP2P415690_rs8695175 | 32407125 | A | 0   | 0.2143 | C |
| 36 | BICF2G630754647         | 32419363 | A | 0   | 0.2143 | C |
| 36 | BICF2S2378410           | 32440675 | A | 0   | 0      | G |
| 36 | BICF2G630754624         | 32447686 | A | 0   | 0      | C |
| 36 | BICF2G630754598         | 32461189 | A | 0   | 0      | C |
| 36 | BICF2G630754583         | 32471942 | A | 0.5 | 0.5    | C |
| 36 | BICF2G630754572         | 32476428 | A | 0.5 | 0.5    | G |
| 36 | BICF2G630754530         | 32493844 | A | 1   | 1      | G |
| 36 | BICF2P1075943           | 32505072 | A | 0   | 0      | G |
| 36 | TIGRP2P415709_rs8544318 | 32512121 | A | 0   | 0      | G |
| 36 | BICF2P1057864           | 32527702 | 0 | 0   | 0      | C |
| 36 | TIGRP2P415724_rs9095157 | 32537262 | G | 0   | 0      | A |
| 36 | BICF2G630754509         | 32546123 | A | 0.5 | 0.5    | G |
| 36 | BICF2G630754494         | 32562832 | G | 1   | 1      | A |
| 36 | BICF2G630754470         | 32582072 | A | 0   | 0      | G |
| 36 | BICF2G630754451         | 32592924 | A | 0   | 0      | G |
| 36 | BICF2G630754427         | 32609657 | G | 0.5 | 0.2857 | A |
| 36 | BICF2G630754423         | 32619948 | A | 0.5 | 0.5    | G |
| 36 | BICF2G630754410         | 32630956 | A | 0.5 | 0.2857 | G |
| 36 | BICF2G630754390         | 32641103 | A | 0   | 0      | G |
| 36 | BICF2G630754378         | 32649913 | G | 0   | 0      | A |
| 36 | BICF2G630754353         | 32661141 | A | 0.5 | 0.2857 | G |
| 36 | BICF2G630754343         | 32673152 | A | 0   | 0      | G |
| 36 | BICF2G630754329         | 32683961 | A | 0   | 0.2143 | G |
| 36 | TIGRP2P415776_rs9154381 | 32698990 | 0 | 0   | 0      | A |

|    |                         |          |   |     |        |   |
|----|-------------------------|----------|---|-----|--------|---|
| 36 | BICF2P854594            | 32721728 | G | 0   | 0      | A |
| 36 | BICF2G630754278         | 32731886 | A | 0   | 0.2143 | G |
| 36 | BICF2S23744871          | 32747547 | 0 | 0   | 0      | A |
| 36 | TIGRP2P415795_rs8853536 | 32759461 | 0 | 0   | 0      | C |
| 36 | BICF2P1123972           | 32771539 | A | 0   | 0.4286 | C |
| 36 | BICF2P876362            | 32784798 | A | 0.5 | 0.2857 | G |
| 36 | BICF2P1163317           | 32787450 | A | 0.5 | 0.2857 | T |
| 36 | BICF2G630754236         | 32805932 | A | 0   | 0.4286 | G |
| 36 | TIGRP2P415816_rs8557545 | 32818535 | A | 0.5 | 0.7143 | T |
| 36 | BICF2G630754229         | 32823316 | 0 | 0   | 0      | G |
| 36 | BICF2G630754208         | 32836478 | G | 0.5 | 0.2857 | A |
| 36 | BICF2P18311             | 32848032 | A | 0   | 0      | G |
| 36 | BICF2G630754180         | 32863521 | C | 0   | 0      | A |
| 36 | BICF2G630754173         | 32872792 | G | 0.5 | 0.7143 | A |
| 36 | BICF2P335083            | 32880844 | G | 0.5 | 0.5    | A |
| 36 | TIGRP2P415826_rs9155064 | 32890291 | G | 0.5 | 0.5    | A |
| 36 | TIGRP2P415837_rs8647822 | 32916901 | A | 0   | 0      | G |
| 36 | BICF2G630754108         | 32927876 | A | 0.5 | 0.7143 | G |
| 36 | BICF2S23259262          | 32936207 | G | 0.5 | 0.7143 | A |
| 36 | BICF2G630754043         | 32949326 | A | 1   | 0.5714 | G |
| 36 | TIGRP2P415856_rs9109484 | 32963838 | G | 0.5 | 0.2857 | A |
| 36 | BICF2P329532            | 32974287 | G | 0   | 0.4286 | A |
| 36 | BICF2G630754022         | 32984705 | A | 0.5 | 0.2857 | G |
| 36 | BICF2G630753997         | 32998628 | A | 0   | 0      | G |
| 36 | BICF2G630753992         | 33009700 | A | 0.5 | 0.3571 | G |
| 36 | BICF2G630753986         | 33013064 | A | NA  | 0.3    | G |
| 36 | BICF2P237456            | 33019946 | A | 0.5 | 0.7143 | G |
| 36 | BICF2G630753944         | 33033907 | A | 0.5 | 0.2857 | G |
| 36 | BICF2G630753933         | 33040185 | G | 0   | 0      | A |
| 36 | BICF2S23336142          | 33051126 | A | 0   | 0      | G |
| 36 | TIGRP2P415906_rs8576856 | 33064203 | G | 0.5 | 0.2857 | A |
| 36 | BICF2G630753884         | 33080625 | G | 0.5 | 0.7143 | A |
| 36 | BICF2G630753881         | 33094066 | 0 | 0   | 0      | G |
| 36 | BICF2P536784            | 33097801 | G | 0   | 0.3571 | A |
| 36 | BICF2G630753846         | 33110001 | 0 | 0   | 0      | A |
| 36 | BICF2P948493            | 33124501 | A | 0   | 0.3571 | G |
| 36 | BICF2P1438153           | 33128832 | G | 1   | 0.75   | A |
| 36 | BICF2G630753820         | 33132798 | G | 0.5 | 0.7143 | A |
| 36 | BICF2G630753800         | 33153872 | A | 0.5 | 0.2857 | G |
| 36 | BICF2G630753797         | 33154134 | G | 0.5 | 0.2857 | A |
| 36 | BICF2G630753783         | 33168982 | G | 0   | 0      | A |
| 36 | BICF2G630753765         | 33176234 | A | 0.5 | 0.7143 | G |
| 36 | BICF2G630753745         | 33182959 | G | 0   | 0.3571 | A |
| 36 | BICF2G630753731         | 33189416 | A | 0   | 0      | G |
| 36 | BICF2G630753715         | 33202130 | G | 0.5 | 0.7143 | A |
| 36 | BICF2G630753682         | 33214188 | 0 | 0   | 0      | G |
| 36 | BICF2P1125689           | 33227473 | G | 0.5 | 0.2857 | A |

|    |                         |          |   |     |        |   |
|----|-------------------------|----------|---|-----|--------|---|
| 36 | BICF2P433648            | 33240903 | A | 0   | 0.3571 | T |
| 36 | BICF2G630753621         | 33253380 | A | 0.5 | 0.2857 | G |
| 36 | BICF2S2371516           | 33280621 | G | 0   | 0      | A |
| 36 | TIGRP2P415972_rs9149664 | 33286145 | G | 0.5 | 0.7143 | A |
| 36 | BICF2P323765            | 33299411 | A | 1   | 1      | G |
| 36 | BICF2S22931043          | 33314427 | A | 0.5 | 0.3571 | G |
| 36 | BICF2P1159147           | 33320232 | A | 0.5 | 0.4286 | G |
| 36 | BICF2P870662            | 33326945 | G | 0   | 0      | A |
| 36 | BICF2P146337            | 33335105 | C | 0   | 0.2143 | A |
| 36 | BICF2P1234161           | 33342513 | A | 0.5 | 0.2857 | C |
| 36 | BICF2S2309917           | 33352227 | A | 0.5 | 0.5    | G |
| 36 | BICF2P464896            | 33364997 | G | 0.5 | 0.2857 | A |
| 36 | BICF2P383338            | 33378399 | A | 0.5 | 0.5    | G |
| 36 | TIGRP2P416013_rs8981093 | 33386531 | A | 0   | 0.1429 | G |
| 36 | BICF2P1074499           | 33396732 | G | 0.5 | 0.4286 | C |
| 36 | BICF2S2337924           | 33419108 | A | 0.5 | 0.5    | G |
| 36 | BICF2P684216            | 33435133 | 0 | 0   | 0      | A |
| 36 | BICF2S23143053          | 33443646 | G | 0.5 | 0.5    | A |
| 36 | BICF2P286635            | 33461447 | C | 0   | 0      | A |
| 36 | TIGRP2P416027_rs8654948 | 33473405 | 0 | 0   | 0      | G |
| 36 | BICF2P1104708           | 33478194 | 0 | 0   | 0      | G |
| 36 | BICF2S23738844          | 33490187 | G | 0   | 0      | A |
| 36 | BICF2S23058886          | 33505336 | A | 0.5 | 0.2857 | G |
| 36 | TIGRP2P416031_rs8881506 | 33511888 | G | 0.5 | 0.3571 | A |
| 36 | BICF2P1321813           | 33526304 | C | 0   | 0.1429 | A |
| 36 | BICF2P412847            | 33541938 | A | 0   | 0.2143 | G |
| 36 | TIGRP2P416050_rs8907726 | 33552606 | A | 0.5 | 0.5714 | G |
| 36 | BICF2P339858            | 33557439 | A | 1   | 0.6429 | G |
| 36 | BICF2P556134            | 33575494 | G | 0   | 0.3571 | A |
| 36 | BICF2P431361            | 33584145 | C | 0.5 | 0.3571 | A |
| 36 | TIGRP2P416061_rs8947308 | 33601667 | A | 0.5 | 0.3571 | G |
| 36 | BICF2P1334767           | 33604230 | T | 0   | 0      | A |
| 36 | TIGRP2P416065_rs8885034 | 33623527 | G | 0.5 | 0.7143 | A |
| 36 | BICF2S2333945           | 33628899 | G | 0.5 | 0.3571 | A |
| 36 | BICF2P1159179           | 33638558 | 0 | 0   | 0      | A |
| 36 | BICF2S23450594          | 33657595 | A | 0.5 | 0.5    | G |
| 36 | BICF2S23450685          | 33660950 | C | 0   | 0.1429 | A |
| 36 | TIGRP2P416077_rs9072678 | 33694239 | 0 | 0   | 0      | C |
| 36 | BICF2P215944            | 33697549 | A | 0.5 | 0.4286 | G |
| 36 | BICF2P360880            | 33709544 | A | 0   | 0.2143 | G |
| 36 | BICF2P691323            | 33728250 | A | 0   | 0      | T |
| 36 | BICF2P1157195           | 33743426 | C | 0   | 0.3571 | A |
| 36 | BICF2P1114284           | 33763470 | A | 0   | 0      | C |
| 36 | BICF2S23427992          | 33766700 | A | 0   | 0.3571 | G |
| 36 | BICF2S23450770          | 33786472 | T | 0   | 0.3571 | A |
| 36 | BICF2S23428079          | 33795691 | G | 0   | 0.4    | A |
| 36 | BICF2S2322741           | 33800675 | A | 0   | 0.3571 | G |



|    |                |          |   |   |        |   |
|----|----------------|----------|---|---|--------|---|
| 36 | BICF2P909518   | 33814434 | G | 0 | 0.3571 | A |
| 36 | BICF2S23329161 | 33827475 | A | 0 | 0.3571 | G |
