# Supplementary material for: A COLQ Missense Mutation in Labrador Retrievers Having Congenital Myasthenic Syndrome
Source: PubMed Central journal article supplement (PMC4148433; doi:10.1371/journal.pone.0106425), 2014-08-28
Supplement: pone.0106425.s003.pdf [file pone.0106425.s003.pdf]

**Table S3. Dogs screened for the COLQ 14 Variant**

| Breed                          | Sample Number ( <i>n</i> ) | COLQ Exon 14 Variant Genotype |     |     |
|--------------------------------|----------------------------|-------------------------------|-----|-----|
|                                |                            | T/T                           | T/C | C/C |
| Labrador Retriever (related)   | 58                         | 40                            | 16  | 2   |
| Labrador Retriever (unrelated) | 288                        | 288                           |     |     |
| Afghan Hound                   | 1                          | 1                             |     |     |
| Airedale Terrier               | 2                          | 2                             |     |     |
| Akita                          | 3                          | 3                             |     |     |
| American Eskimo Dog            | 2                          | 2                             |     |     |
| Australian Shepherd            | 2                          | 2                             |     |     |
| Basenji                        | 2                          | 2                             |     |     |
| Bichon Frise                   | 1                          | 1                             |     |     |
| Blue Tick Hound                | 1                          | 1                             |     |     |
| Border Collie                  | 2                          | 2                             |     |     |
| Boston Terrier                 | 2                          | 2                             |     |     |
| Boxer                          | 2                          | 2                             |     |     |
| Briard                         | 2                          | 2                             |     |     |
| Bull Terrier                   | 1                          | 1                             |     |     |
| Cairn Terrier                  | 2                          | 2                             |     |     |
| Cardigan Welsh Corgi           | 2                          | 2                             |     |     |
| Catahoula Leopard Dog          | 2                          | 2                             |     |     |
| Cavalier King Charles Spaniel  | 2                          | 2                             |     |     |
| Chihuahua                      | 2                          | 2                             |     |     |
| Chinese Shar-Pei               | 1                          | 1                             |     |     |
| Chow Chow                      | 1                          | 1                             |     |     |
| Cocker Spaniel                 | 2                          | 2                             |     |     |
| Collie                         | 3                          | 3                             |     |     |
| Dachshund                      | 2                          | 2                             |     |     |
| Doberman Pinscher              | 1                          | 1                             |     |     |
| English Bulldog                | 2                          | 2                             |     |     |
| English Setter                 | 2                          | 2                             |     |     |
| English Springer Spaniel       | 2                          | 2                             |     |     |
| Flat-Coated Retriever          | 1                          | 1                             |     |     |
| German Shepherd Dog            | 2                          | 2                             |     |     |
| Golden Retriever               | 3                          | 3                             |     |     |
| Great Dane                     | 2                          | 2                             |     |     |
| Havanese                       | 1                          | 1                             |     |     |
| Irish Setter                   | 2                          | 2                             |     |     |
| Lhasa Apso                     | 1                          | 1                             |     |     |
| Maltese                        | 1                          | 1                             |     |     |
| Miniature Poodle               | 2                          | 2                             |     |     |
| Miniature Schnauzer            | 2                          | 2                             |     |     |
| New Guinea Singing Dog         | 2                          | 2                             |     |     |
| Newfoundland                   | 2                          | 2                             |     |     |
| Norwegian Elkhound             | 2                          | 2                             |     |     |
| Papillon                       | 1                          | 1                             |     |     |

|                              |   |   |  |  |
|------------------------------|---|---|--|--|
| Pekingese                    | 1 | 1 |  |  |
| Pembroke Welsh Corgi         | 2 | 2 |  |  |
| Petit Basset Griffon Vendéen | 2 | 2 |  |  |
| Podengo                      | 1 | 1 |  |  |
| Polish Lowland Sheepdog      | 1 | 1 |  |  |
| Portuguese Water Dog         | 1 | 1 |  |  |
| Pyrenean Shepherd            | 2 | 2 |  |  |
| Rhodesian Ridgeback          | 2 | 2 |  |  |
| Rottweiler                   | 1 | 1 |  |  |
| Saint Bernard                | 2 | 2 |  |  |
| Shetland Sheepdog            | 2 | 2 |  |  |
| Shih Tzu                     | 1 | 1 |  |  |
| Shiloh Shepherd              | 1 | 1 |  |  |
| Siberian Husky               | 2 | 2 |  |  |
| Silken Windhound             | 2 | 2 |  |  |
| Silky Terrier                | 1 | 1 |  |  |
| Swedish Vallhund             | 2 | 2 |  |  |
| Tibetan Terrier              | 2 | 2 |  |  |
| Vizsla                       | 1 | 1 |  |  |
| Weimaraner                   | 2 | 2 |  |  |
| Welsh Fox Terrier            | 2 | 2 |  |  |
| West Highland White Terrier  | 2 | 2 |  |  |
| Wire Fox Terrier             | 2 | 2 |  |  |
| Yorkshire Terrier            | 2 | 2 |  |  |
